# Supplementary material for: Proteomic analysis of breast tumors confirms the mRNA intrinsic molecular subtypes using different classifiers: a large-scale analysis of fresh frozen tissue samples
Source: Springer Nature journal article supplement (doi:10.1186/s13058-016-0732-2), 2016-06-29

sortie: Basal vs. Her2 . Number of peptides: 20  
ROC area = 0.65 p-value = 0.16

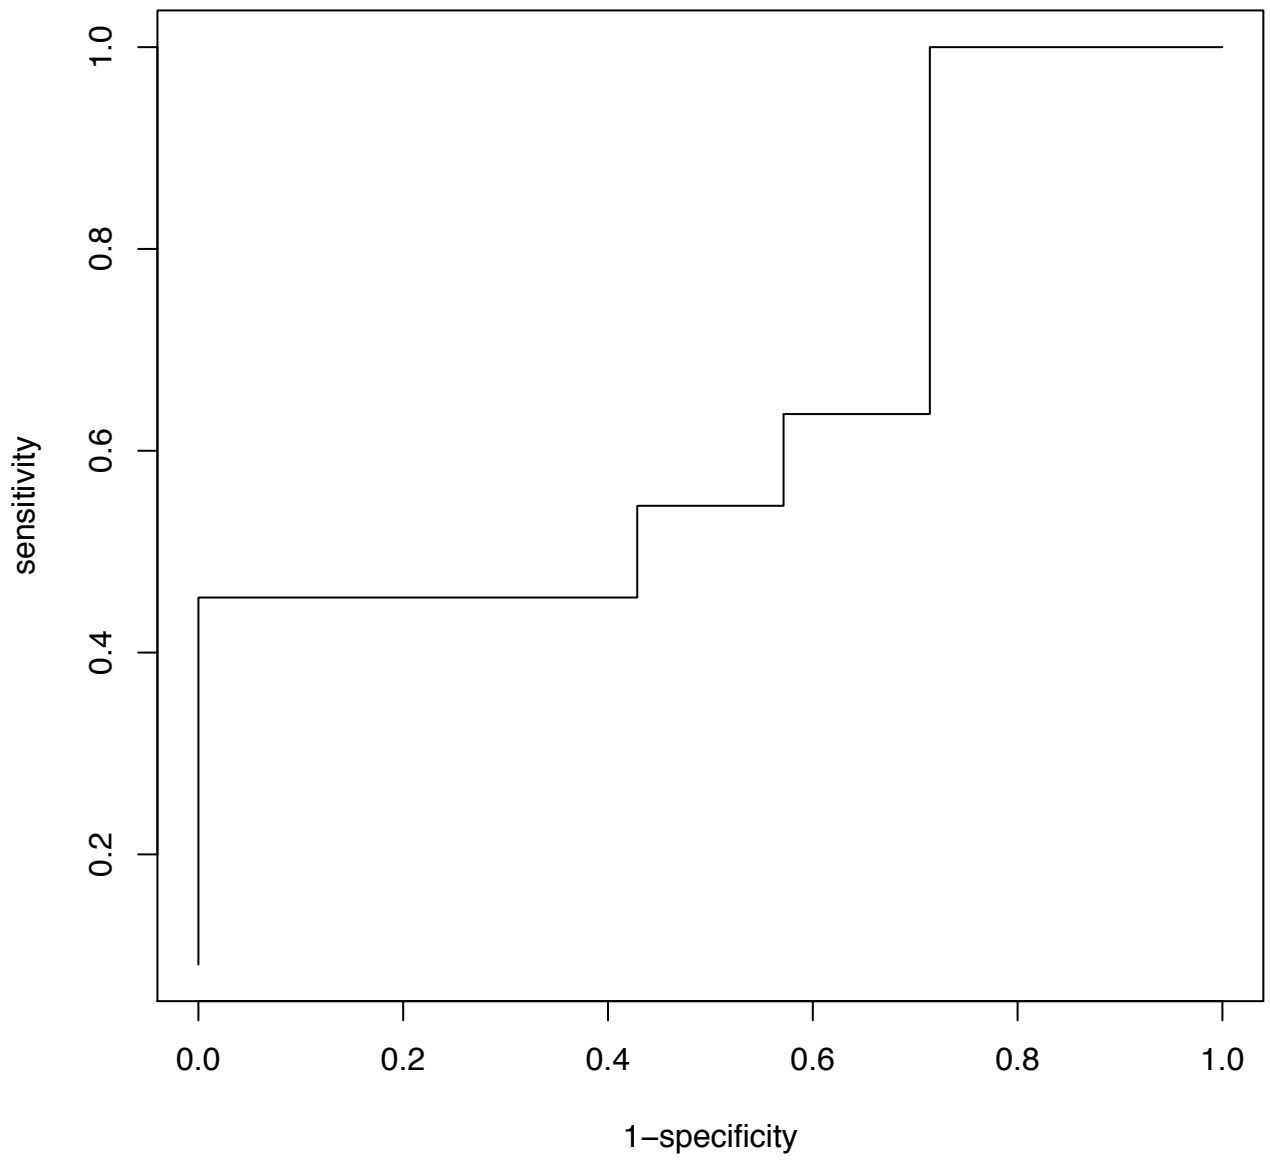

sortie: Basal vs. Her2 . Number of peptides: 30  
ROC area = 0.68 p-value = 0.12

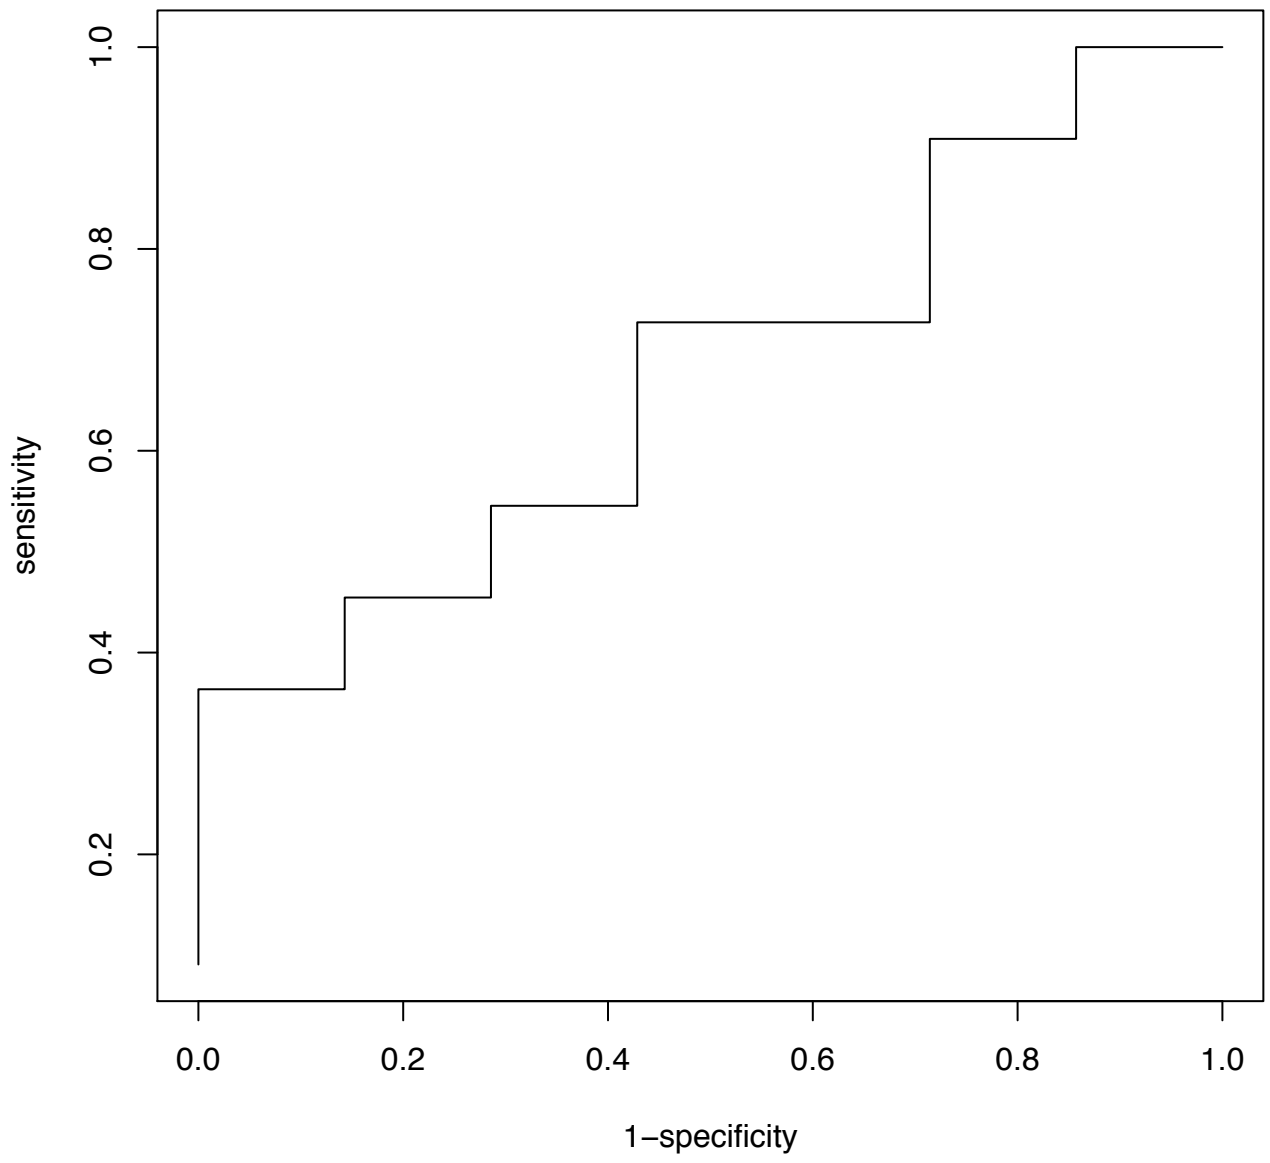

sortie: Basal vs. Her2 . Number of peptides: 40  
ROC area = 0.75 p-value = 0.043

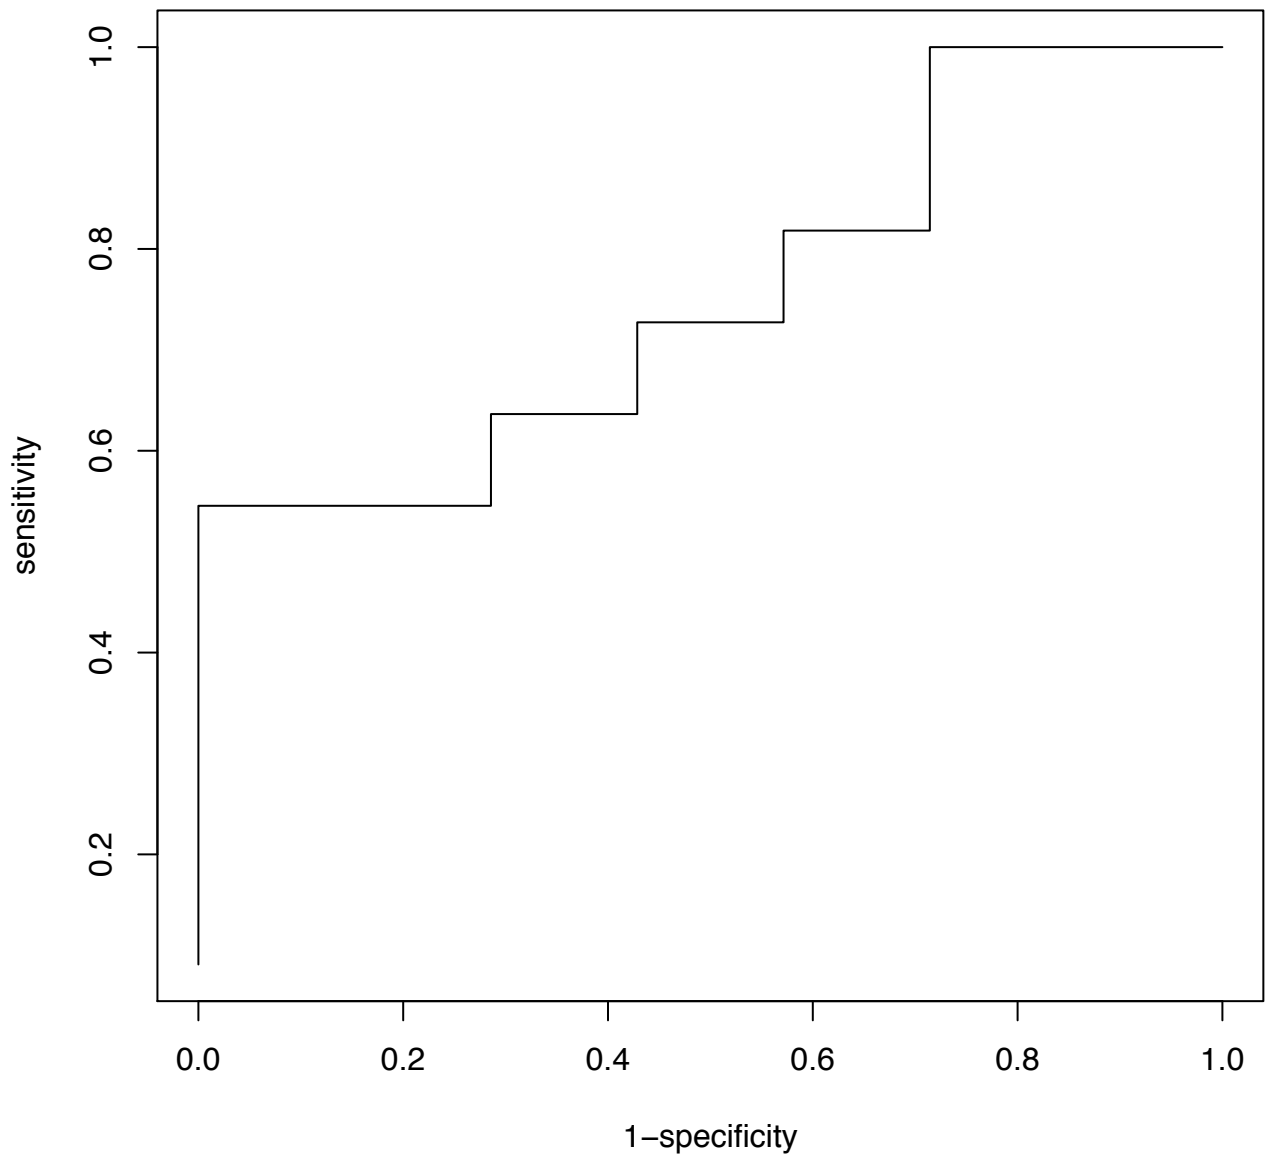

sorlie: Basal vs. Her2 . Number of peptides: 100

ROC area = 0.62 p-value = 0.21

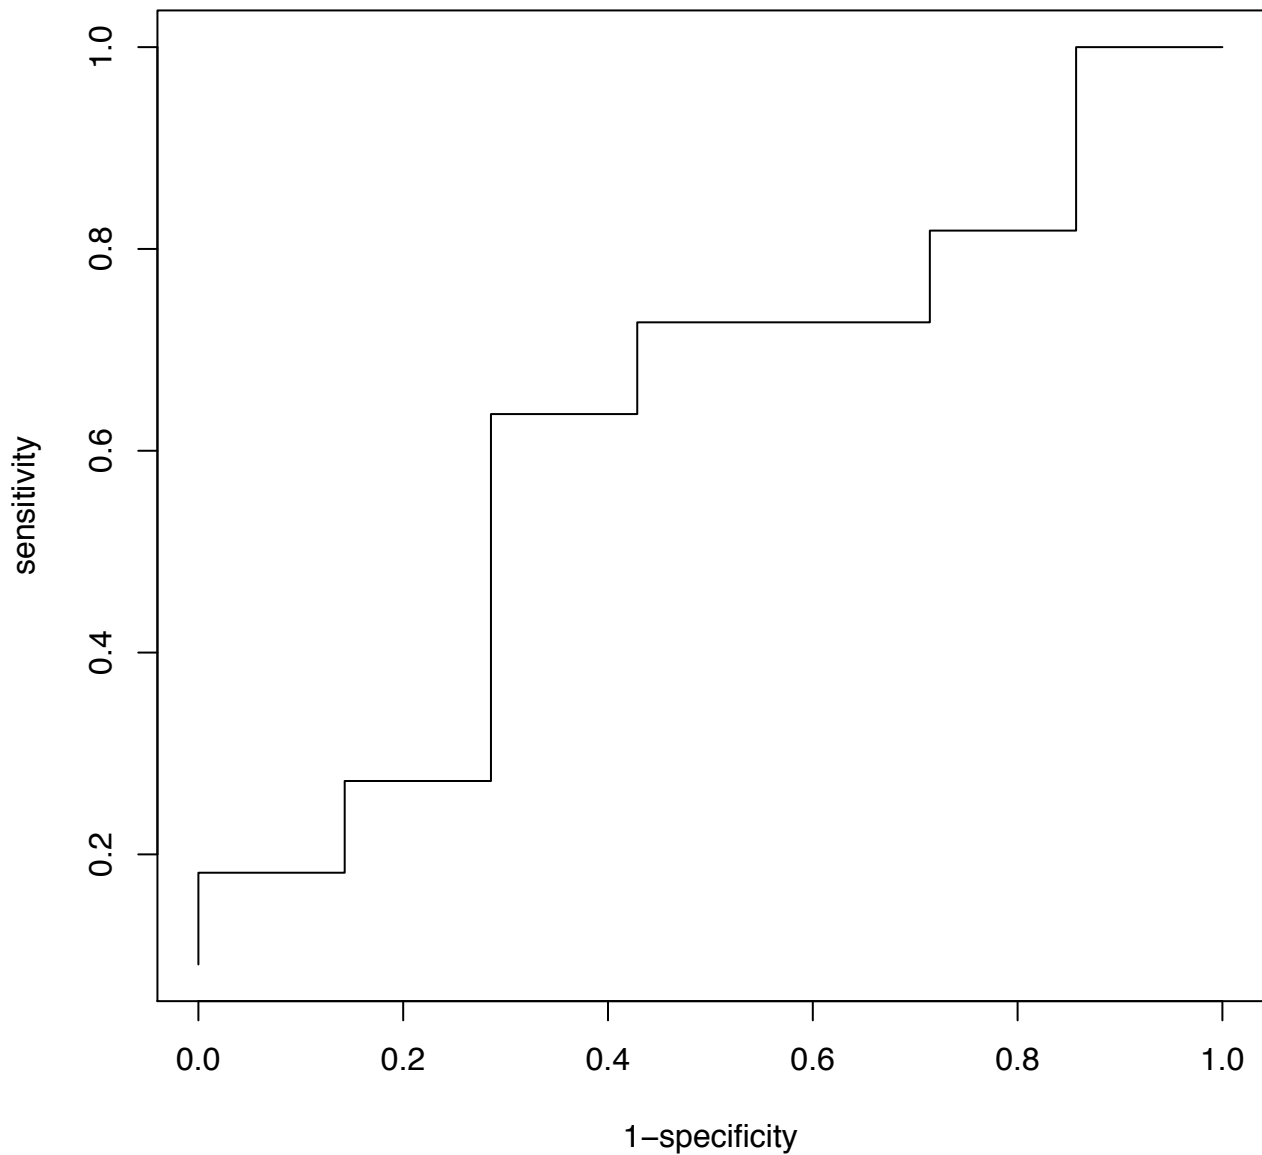

sorlie: Basal vs. Her2 . Number of peptides: NA  
ROC area = 0.58 p-value = 0.3

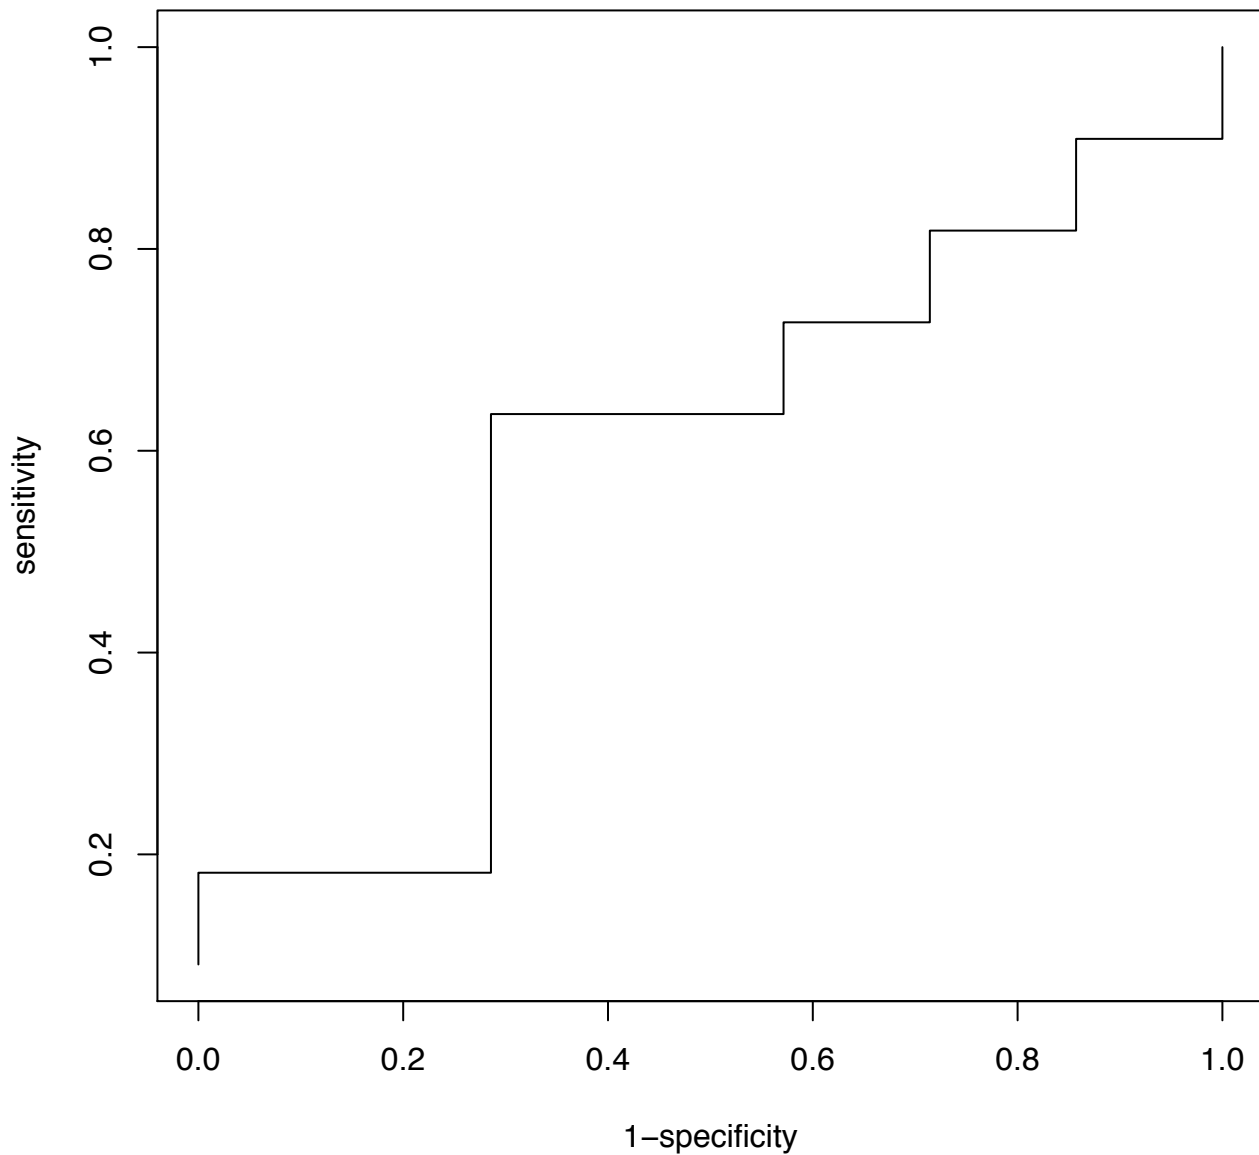

pam50: Basal vs. Her2 . Number of peptides: 20

ROC area = 0.71 p-value = 0.09

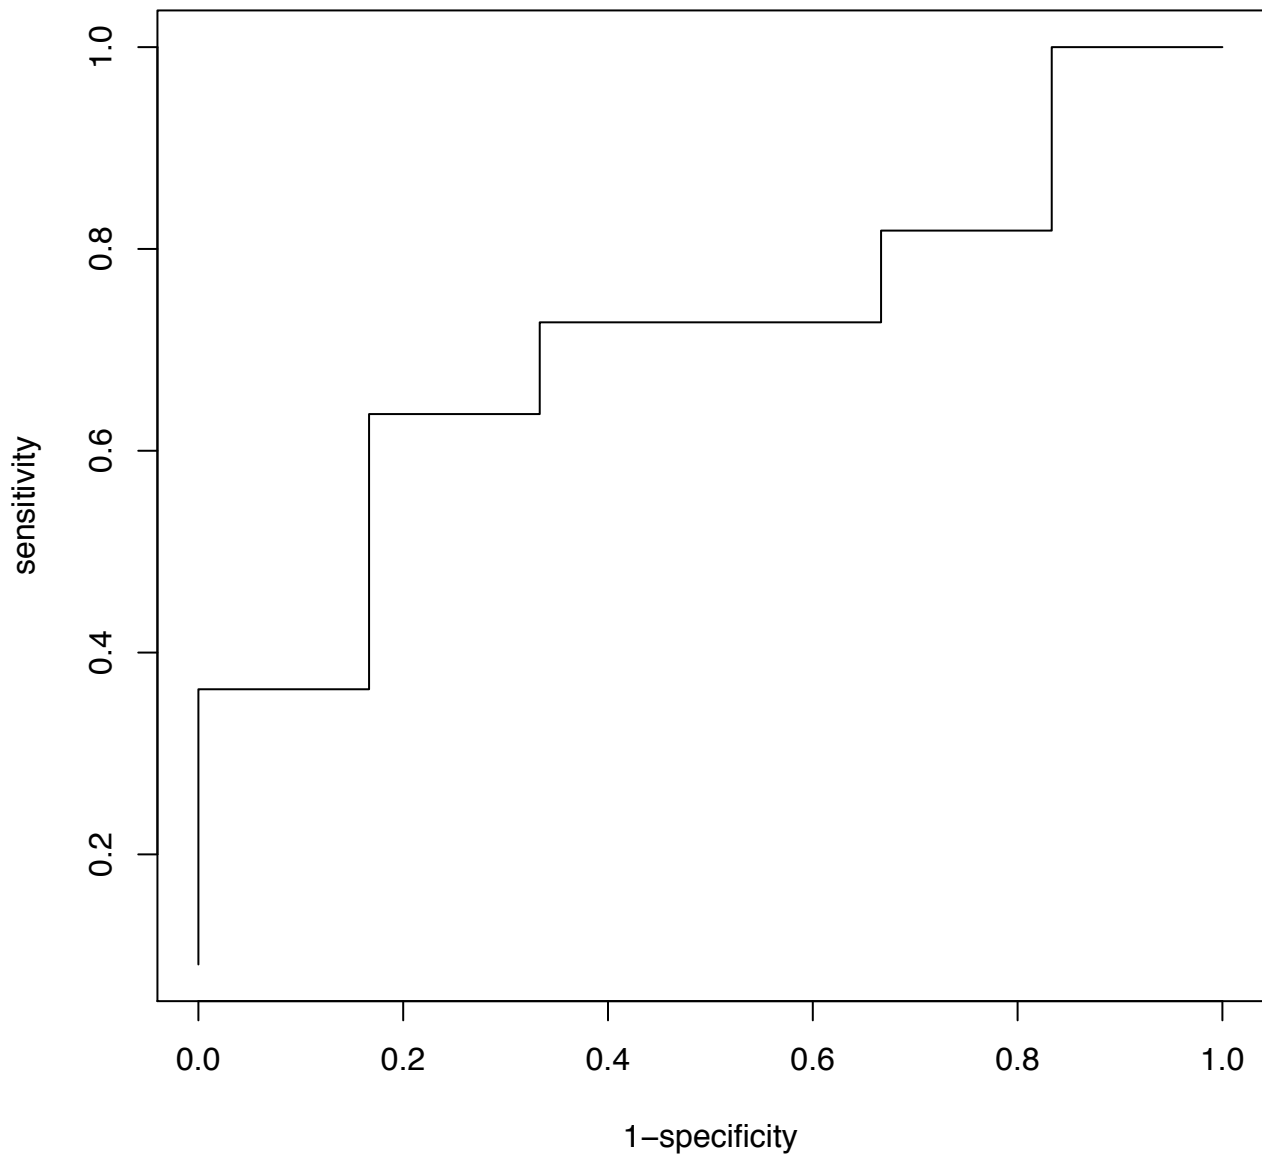

pam50: Basal vs. Her2 . Number of peptides: 30  
ROC area = 0.7 p-value = 0.11

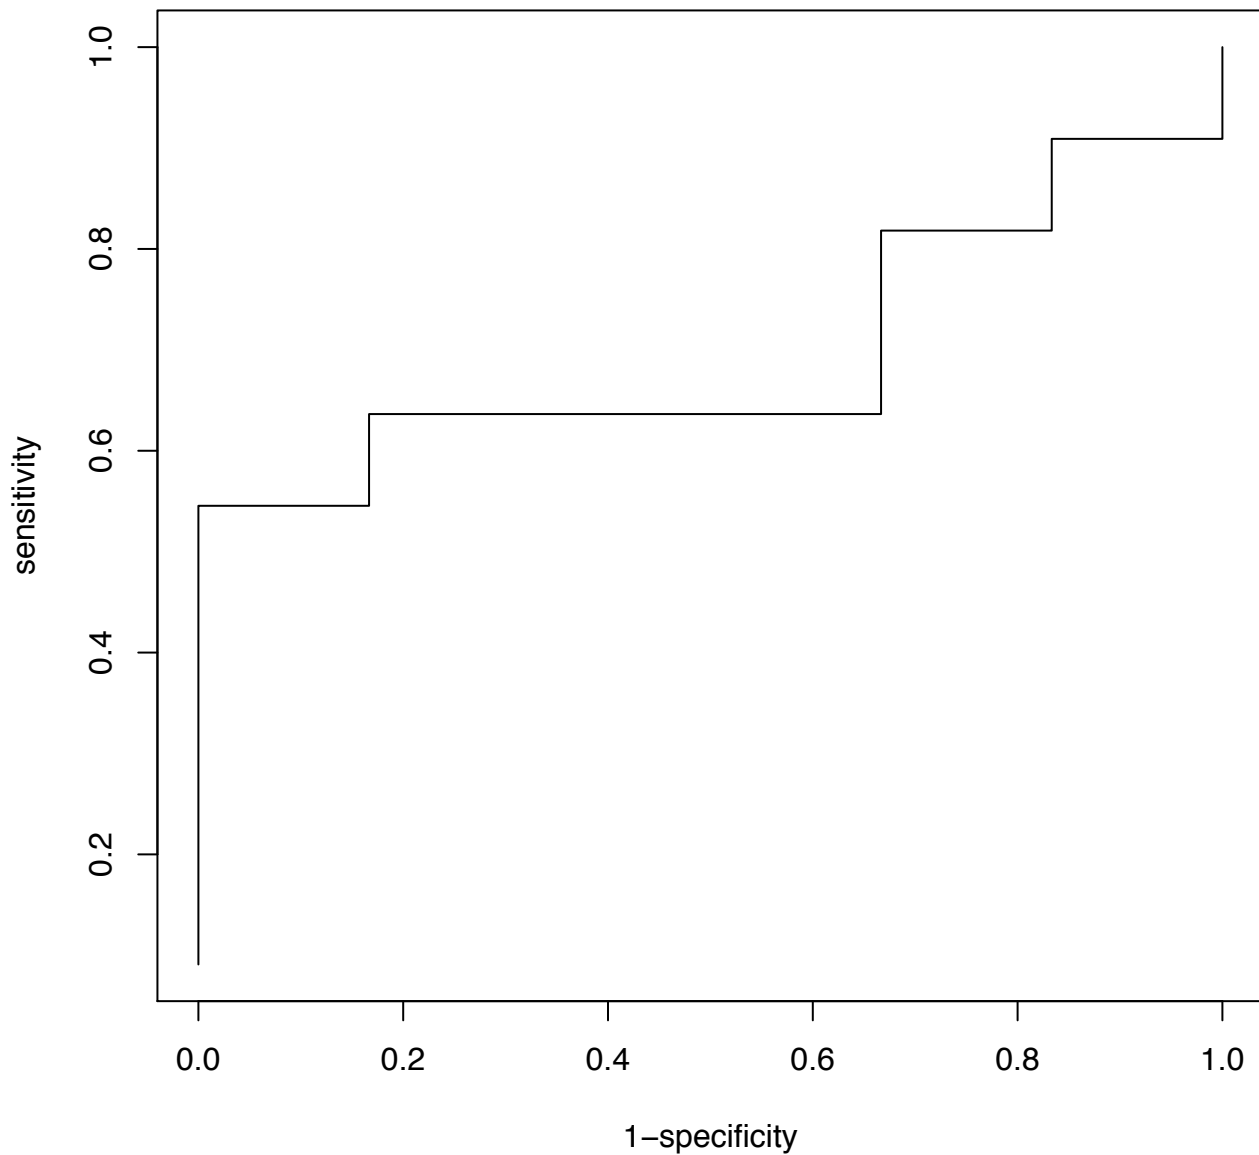

pam50: Basal vs. Her2 . Number of peptides: 40

ROC area = 0.61 p-value = 0.26

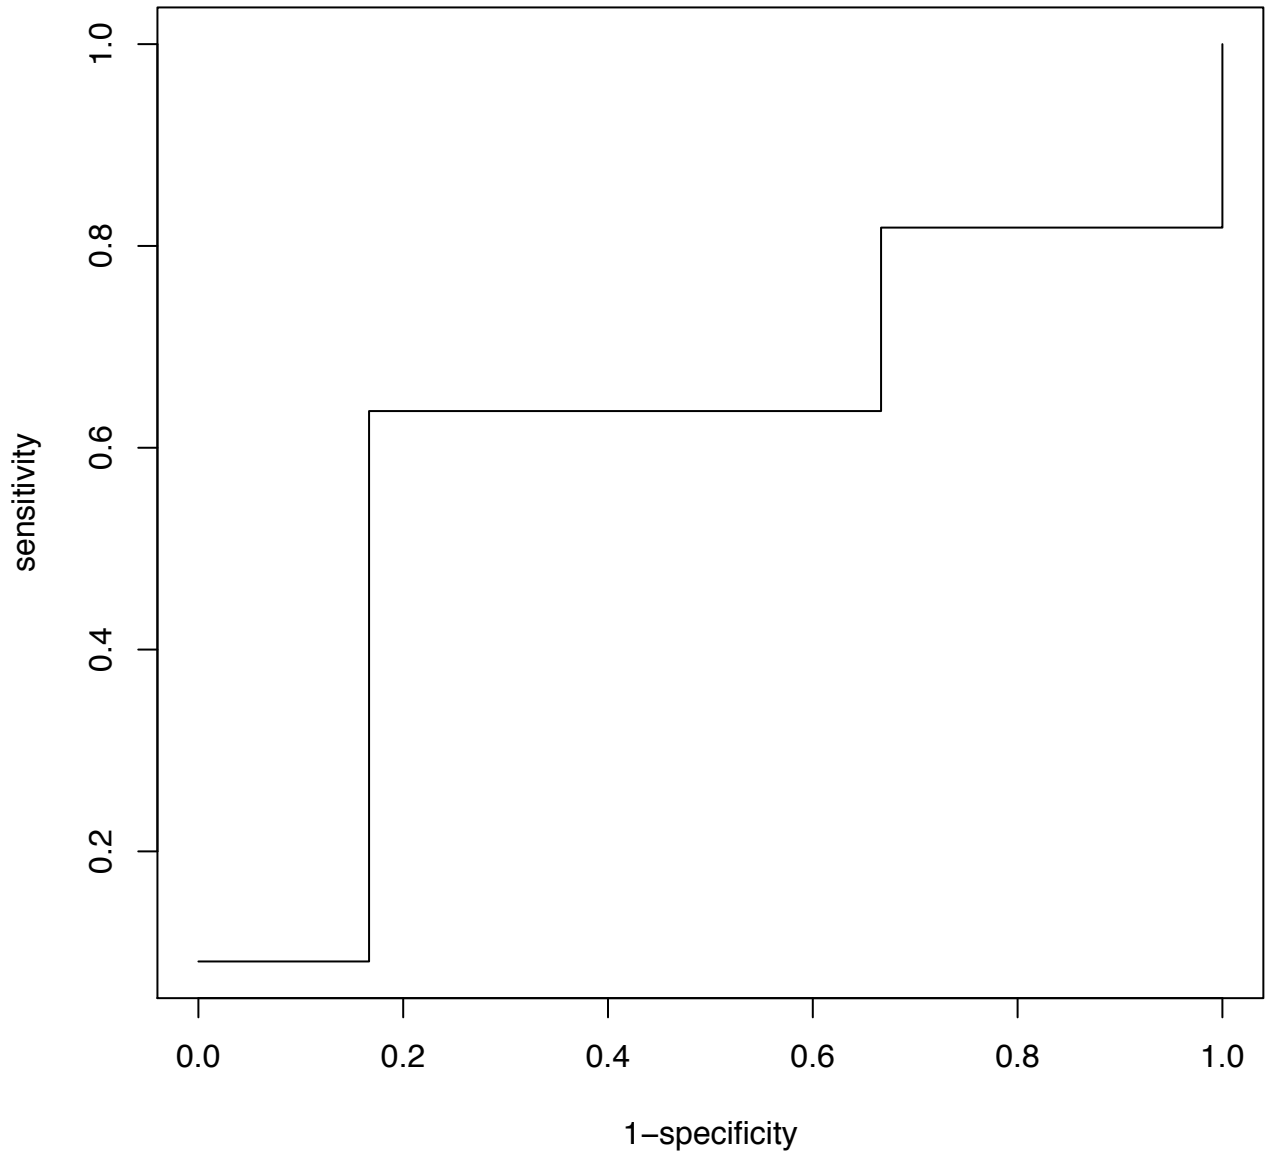



pam50: Basal vs. Her2 . Number of peptides: 100  
ROC area = 0.58 p-value = 0.33

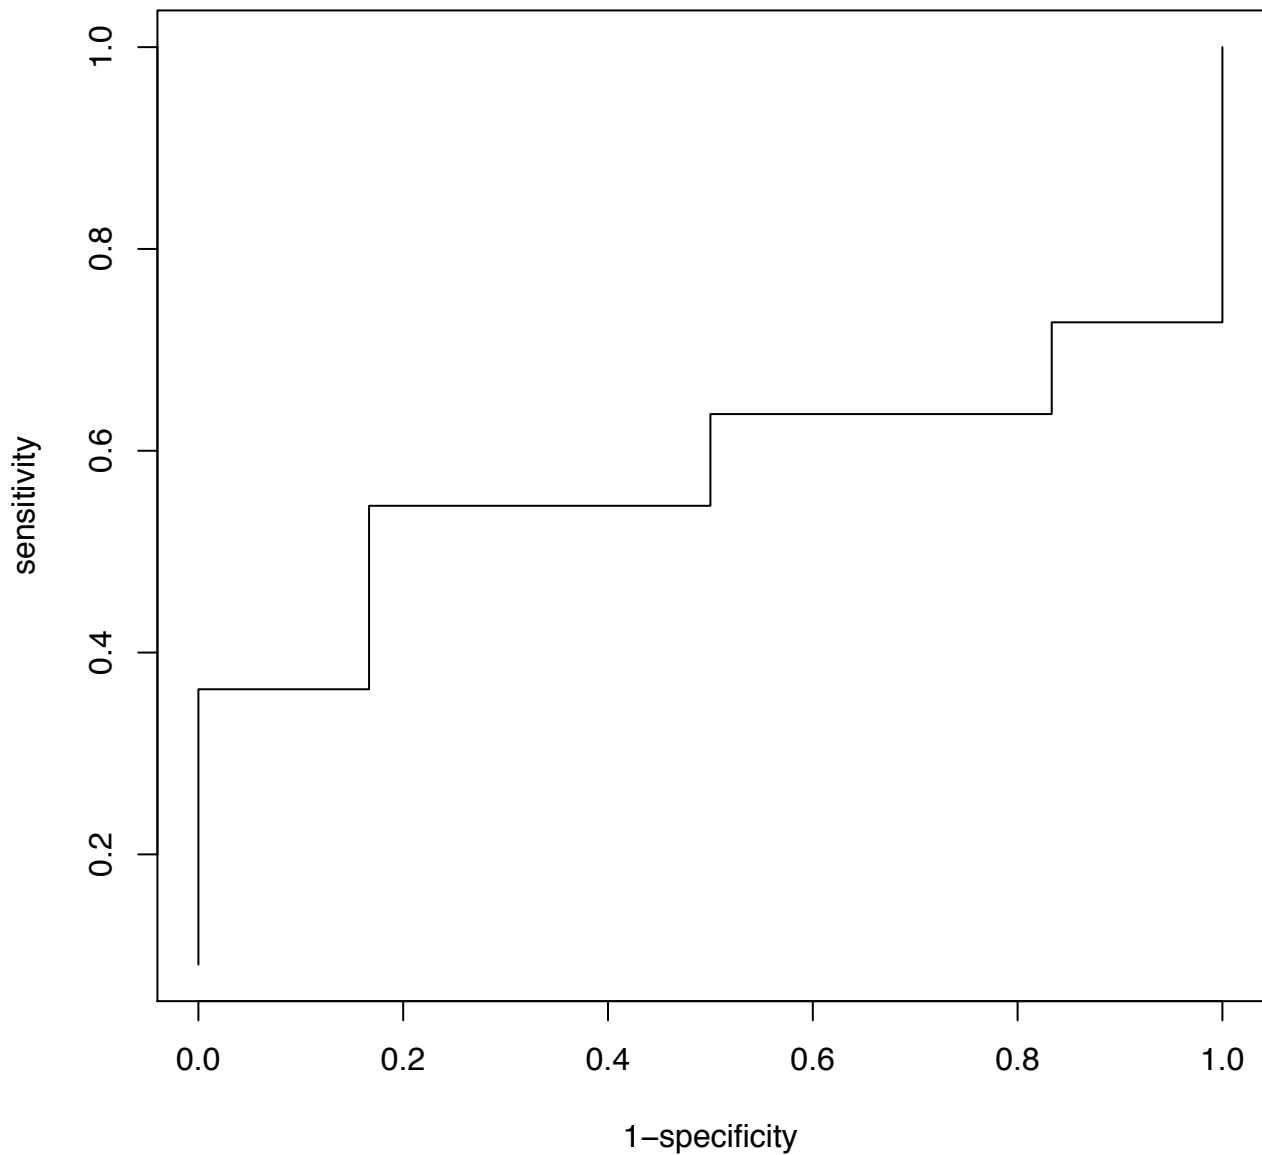

pam50: Basal vs. Her2 . Number of peptides: NA  
ROC area = 0.53 p-value = 0.44

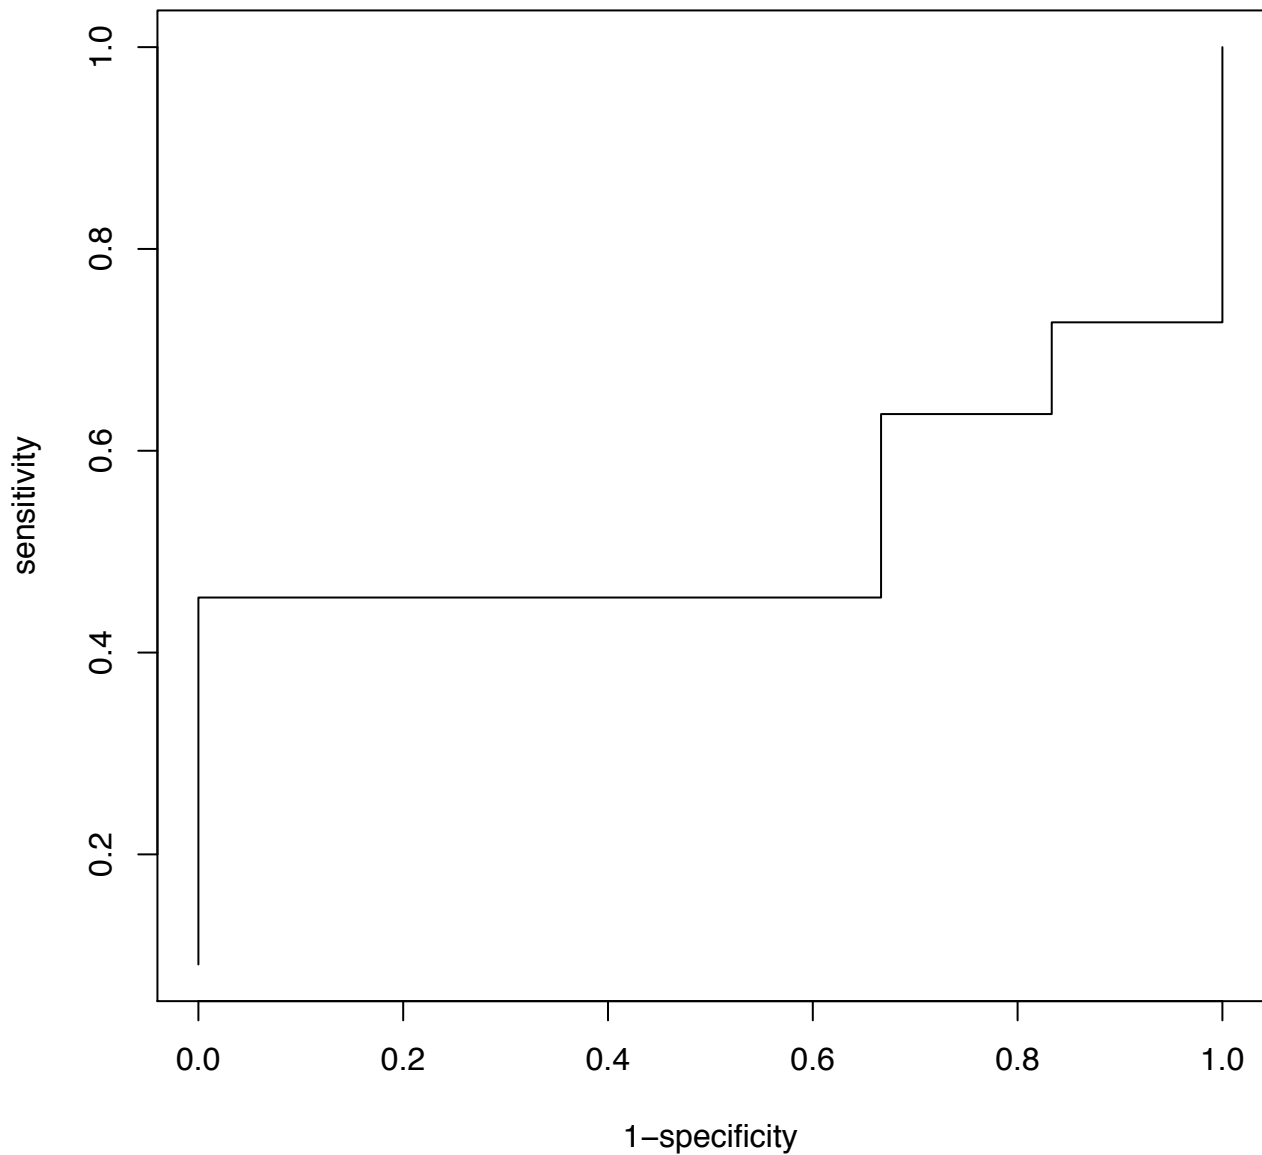

hu: Basal vs. Her2 . Number of peptides: 20

ROC area = 0.66 p-value = 0.19

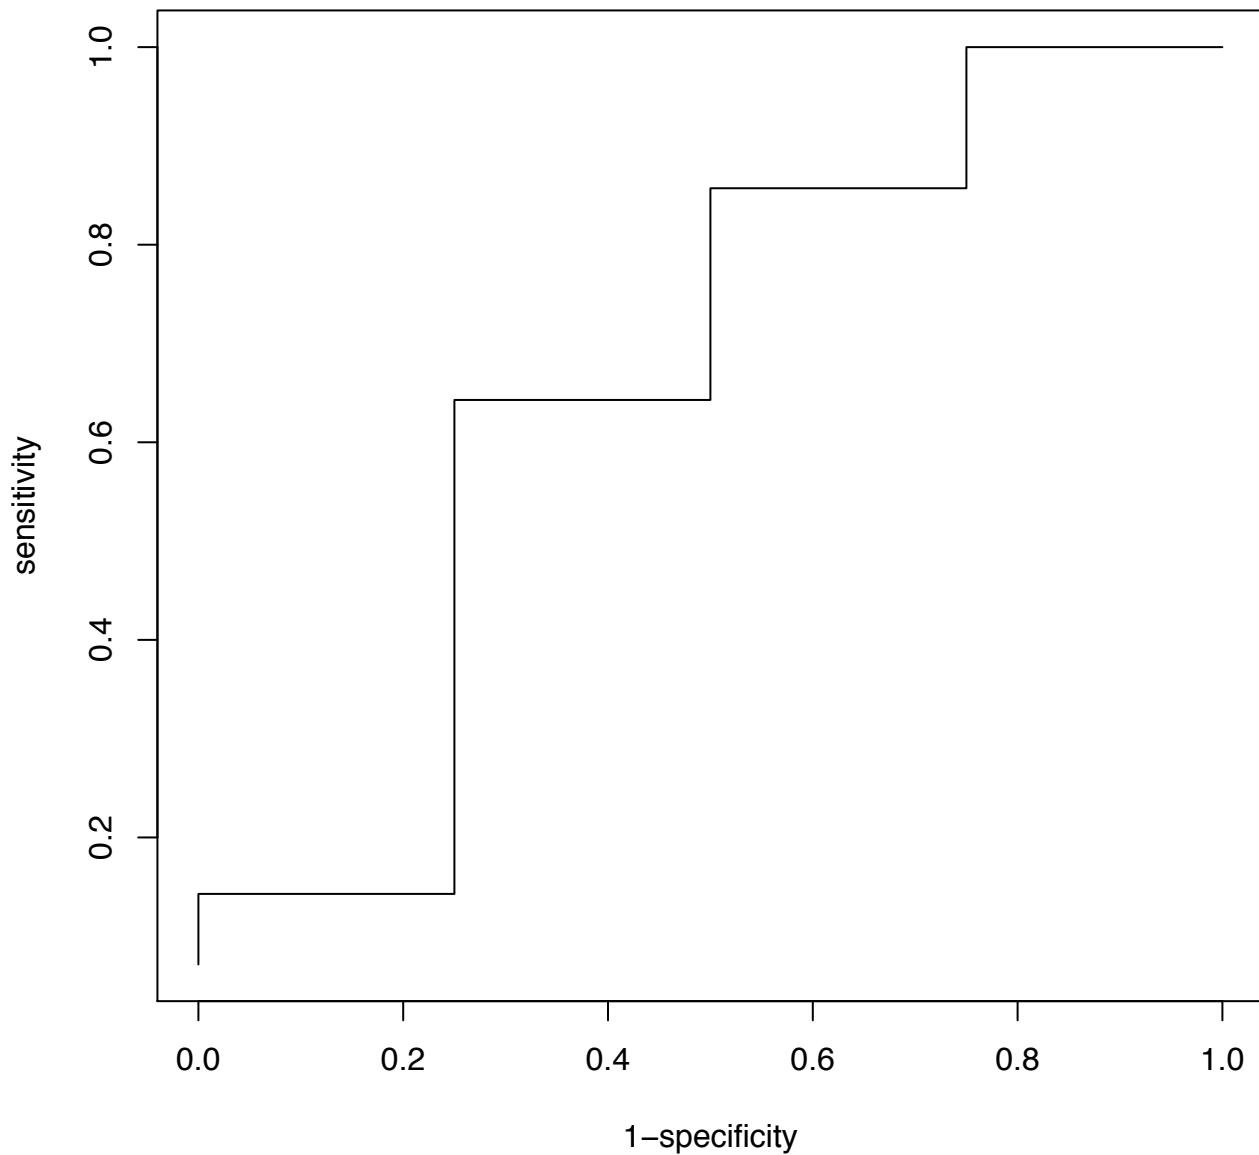

hu: Basal vs. Her2 . Number of peptides: 30

ROC area = 0.71 p-value = 0.12

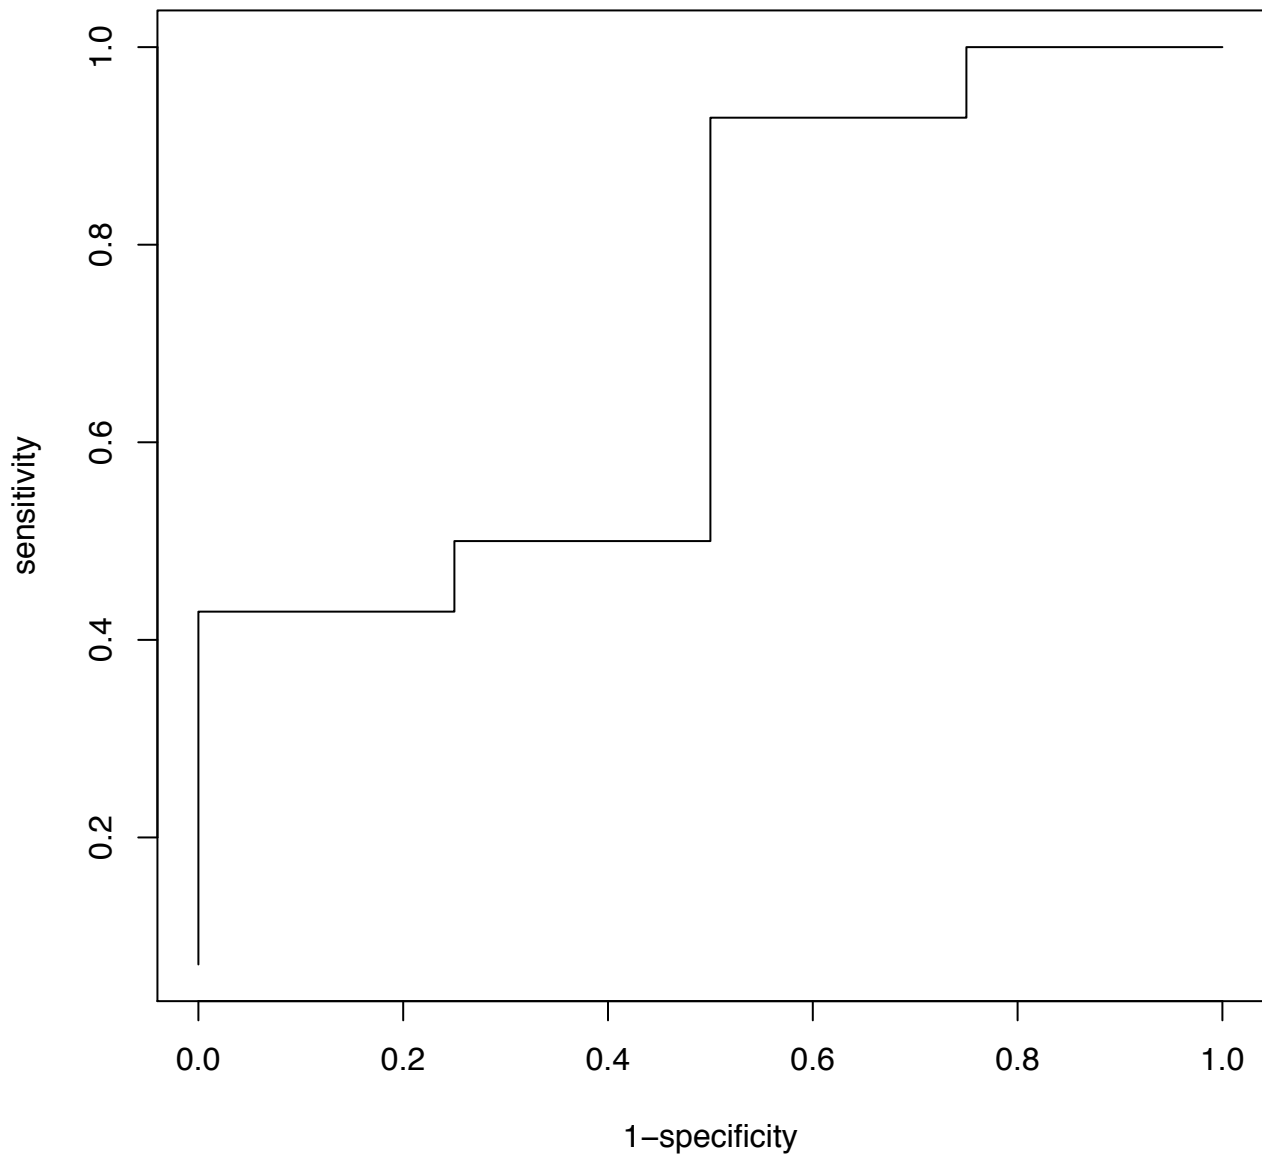

hu: Basal vs. Her2 . Number of peptides: 40

ROC area = 0.71 p-value = 0.12



hu: Basal vs. Her2 . Number of peptides: 100

ROC area = 0.73 p-value = 0.096

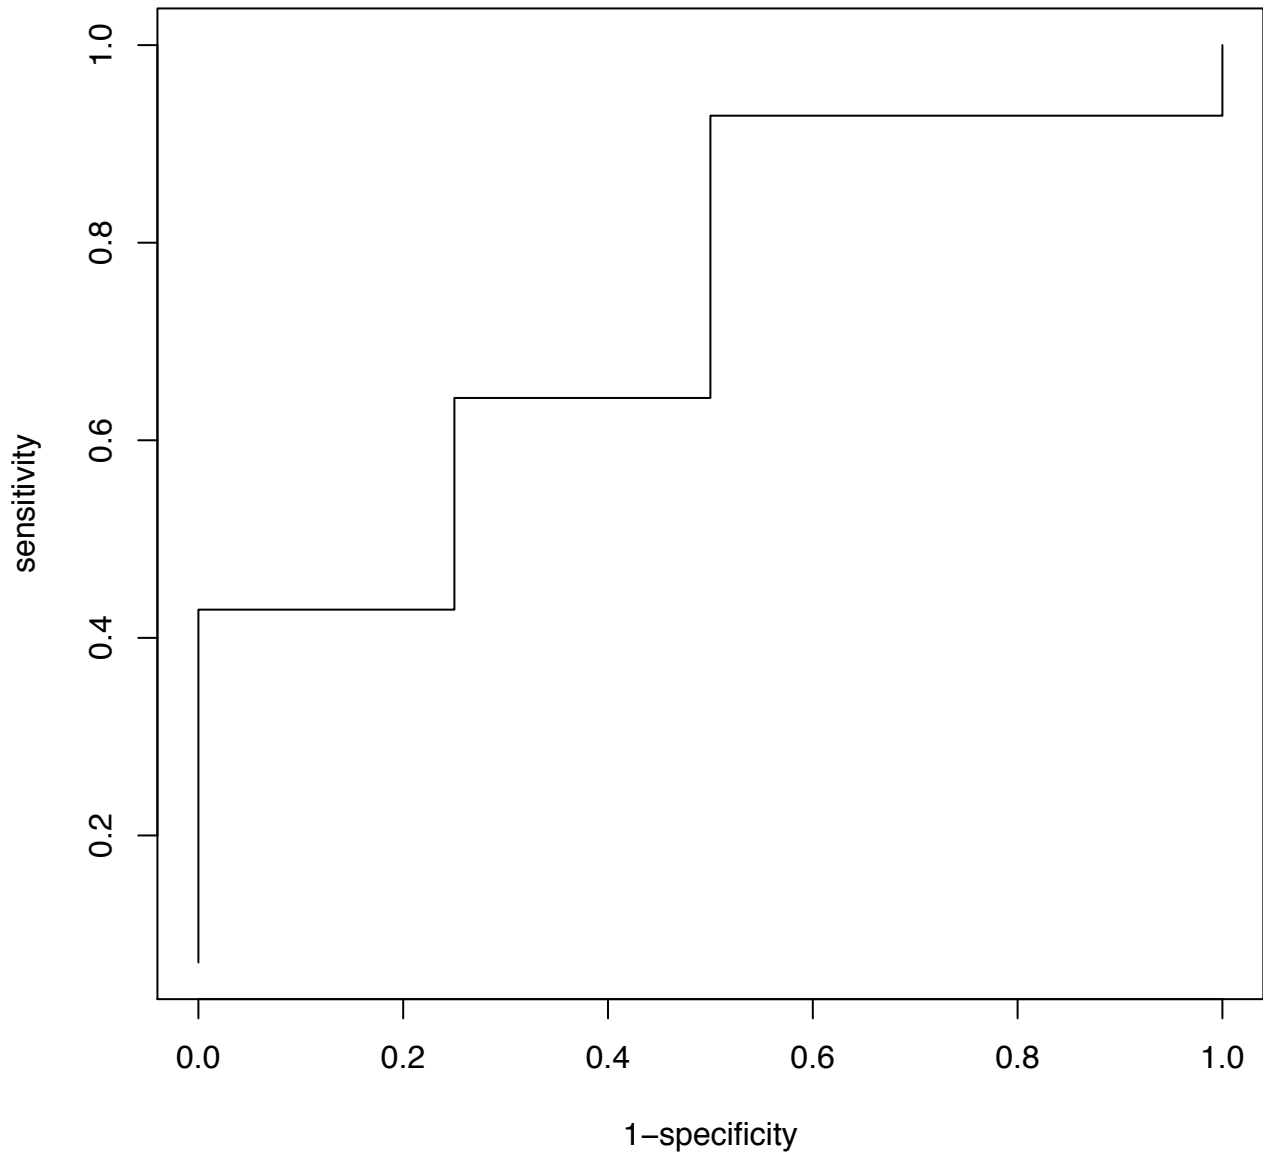

hu: Basal vs. Her2 . Number of peptides: NA  
ROC area = 0.71 p-value = 0.12

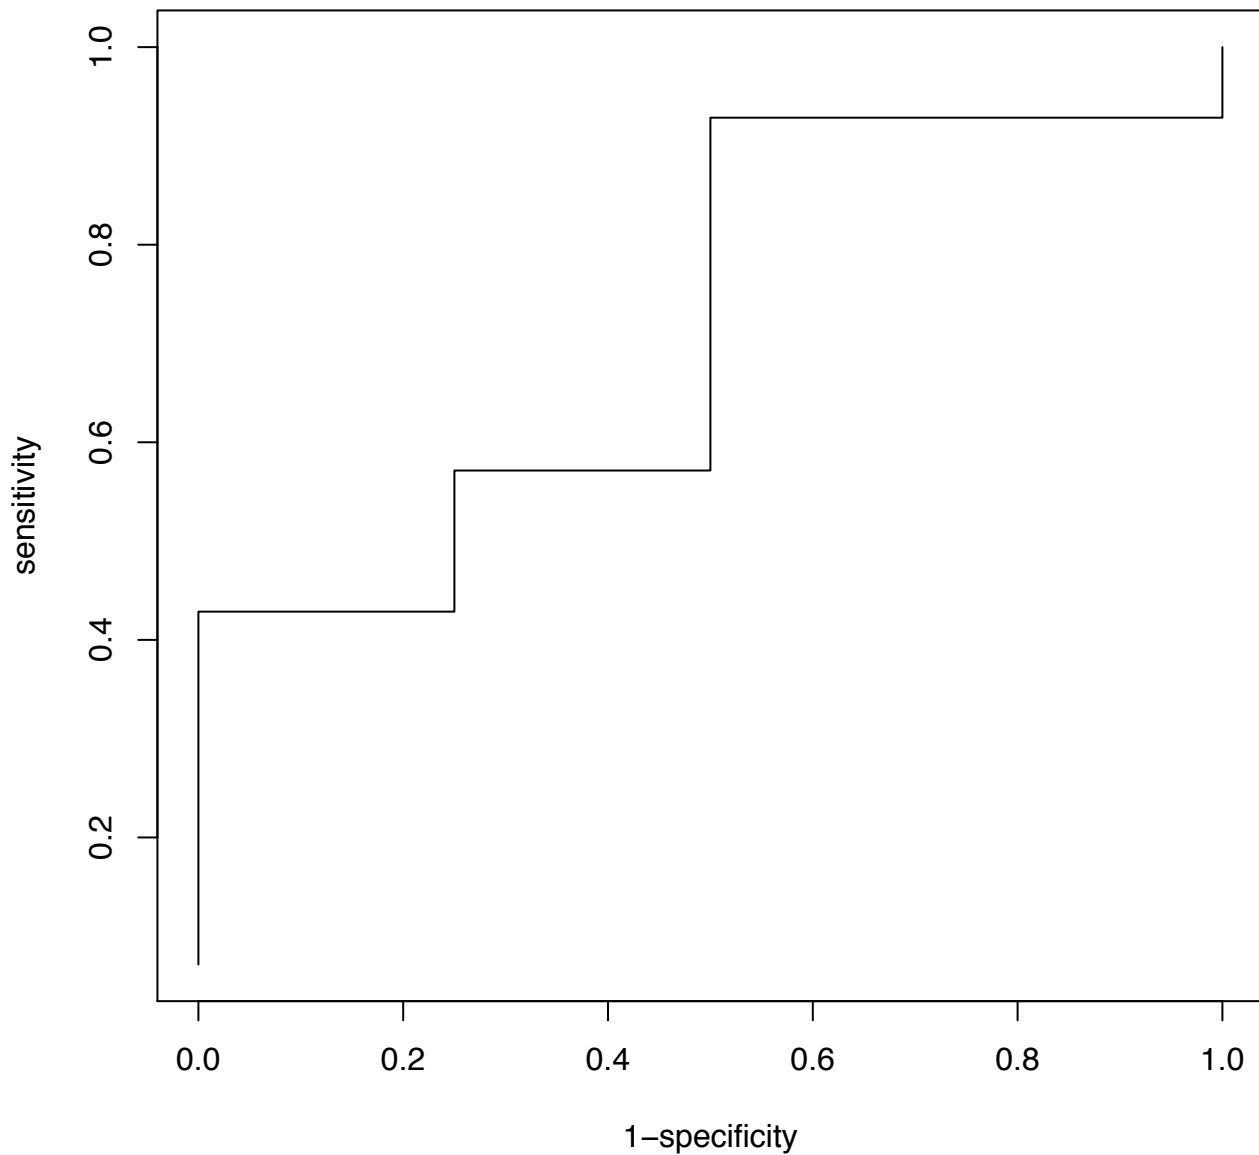

sortie: Basal vs. LumA . Number of peptides: 20

ROC area = 0.82 p-value = 0.0052

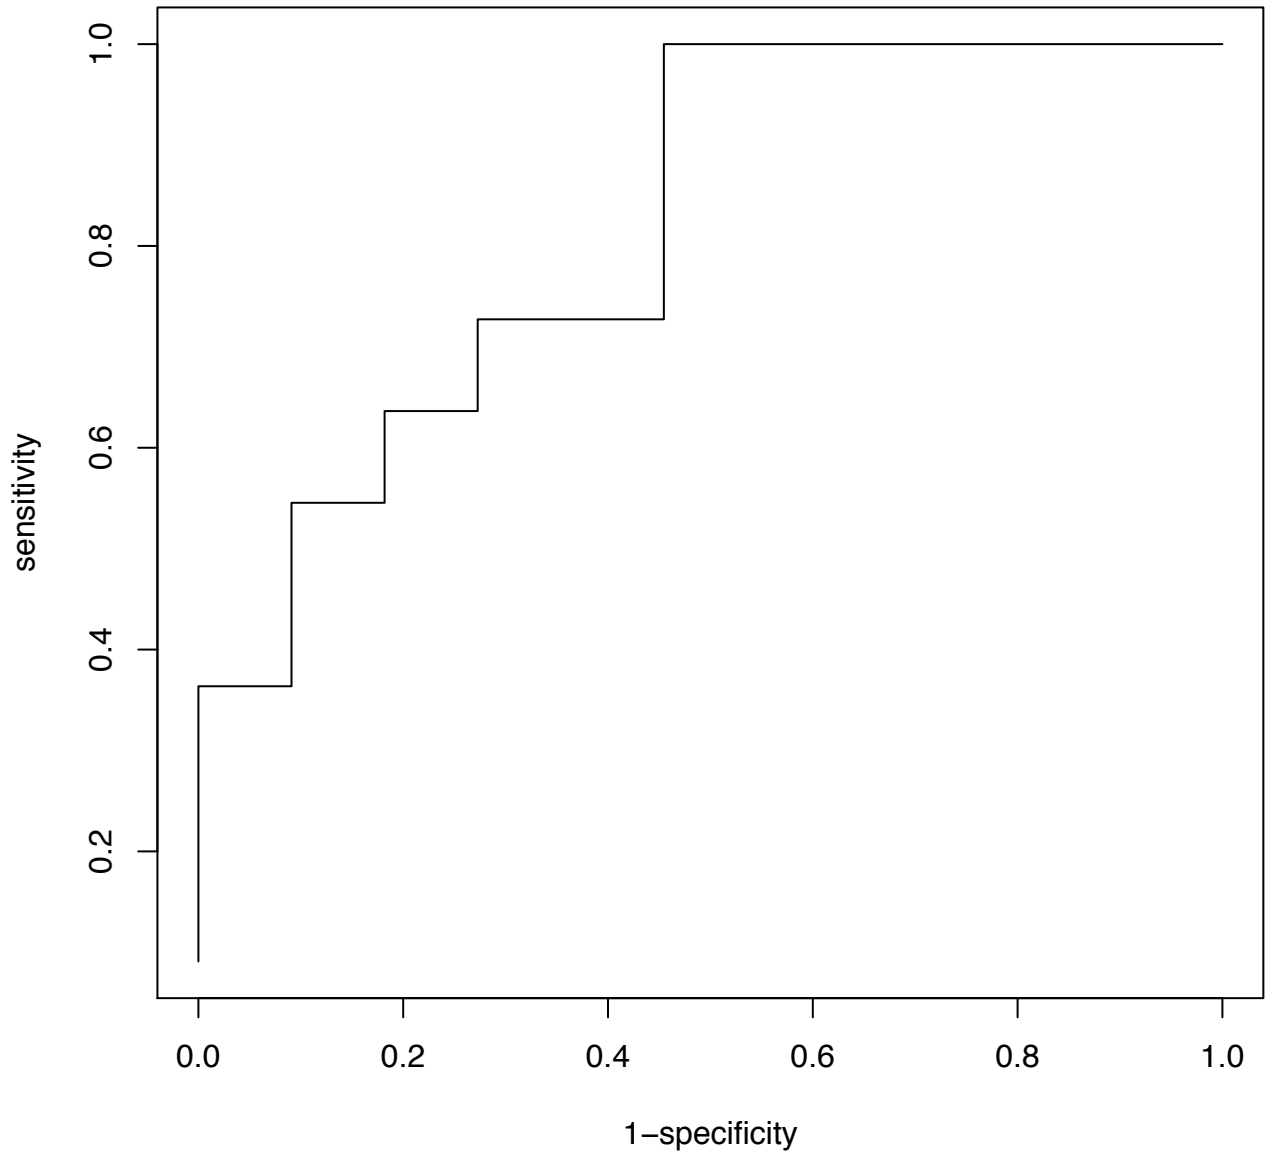



sortie: Basal vs. LumA . Number of peptides: 30

ROC area = 0.88 p-value = 0.00093

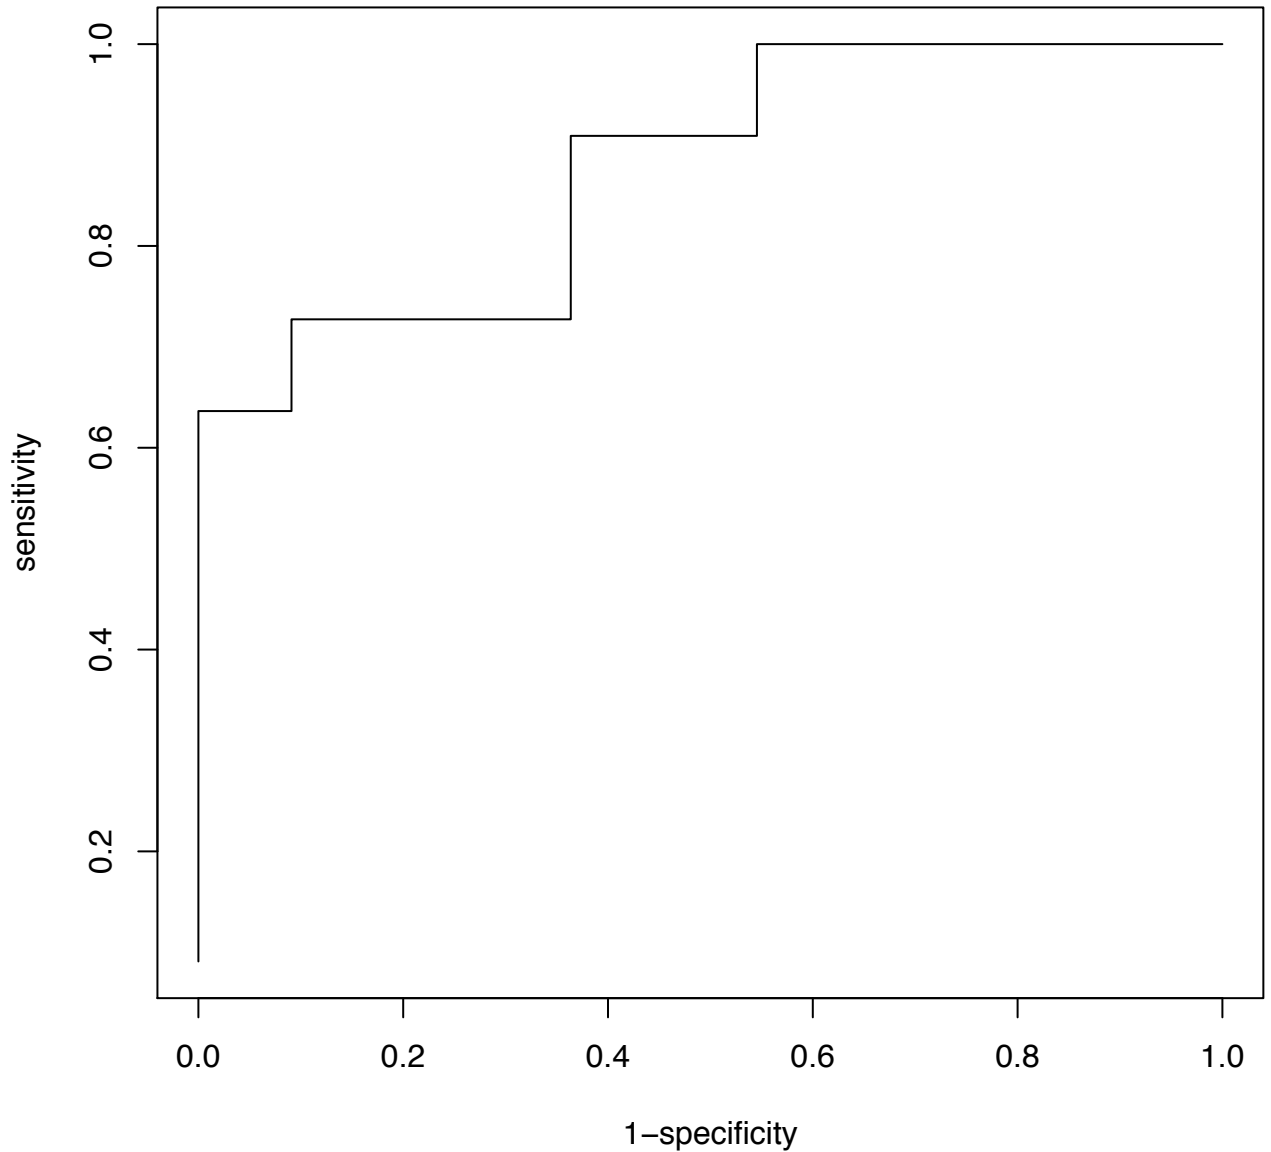

sortie: Basal vs. LumA . Number of peptides: 40

ROC area = 0.84 p-value = 0.0026

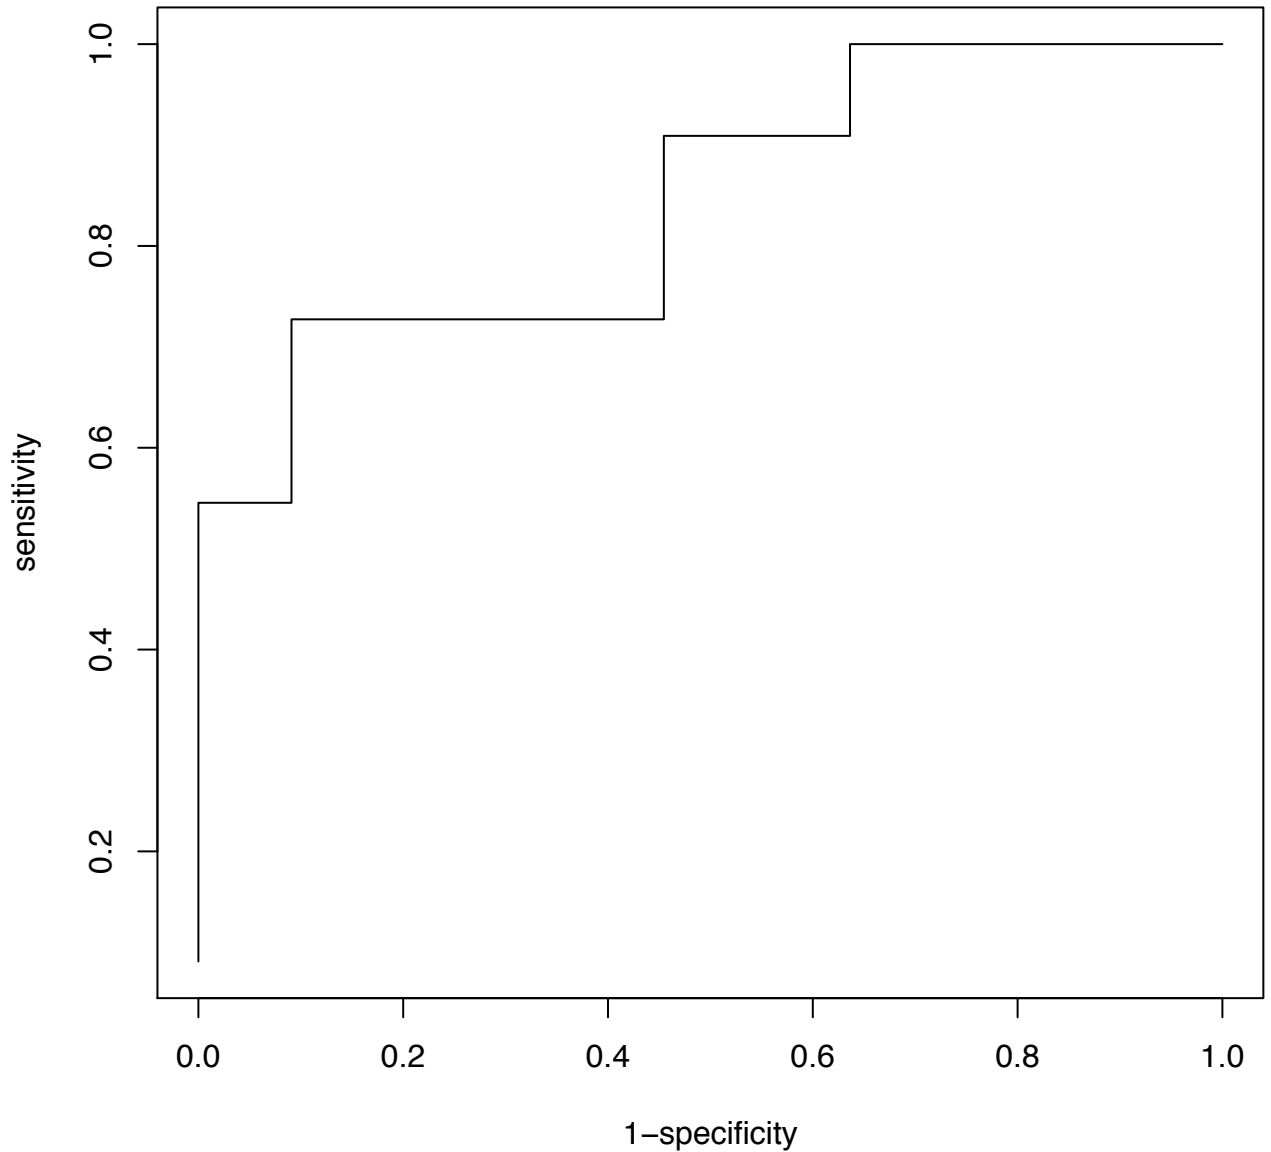

sorlie: Basal vs. LumA . Number of peptides: 100

ROC area = 0.83 p-value = 0.0033

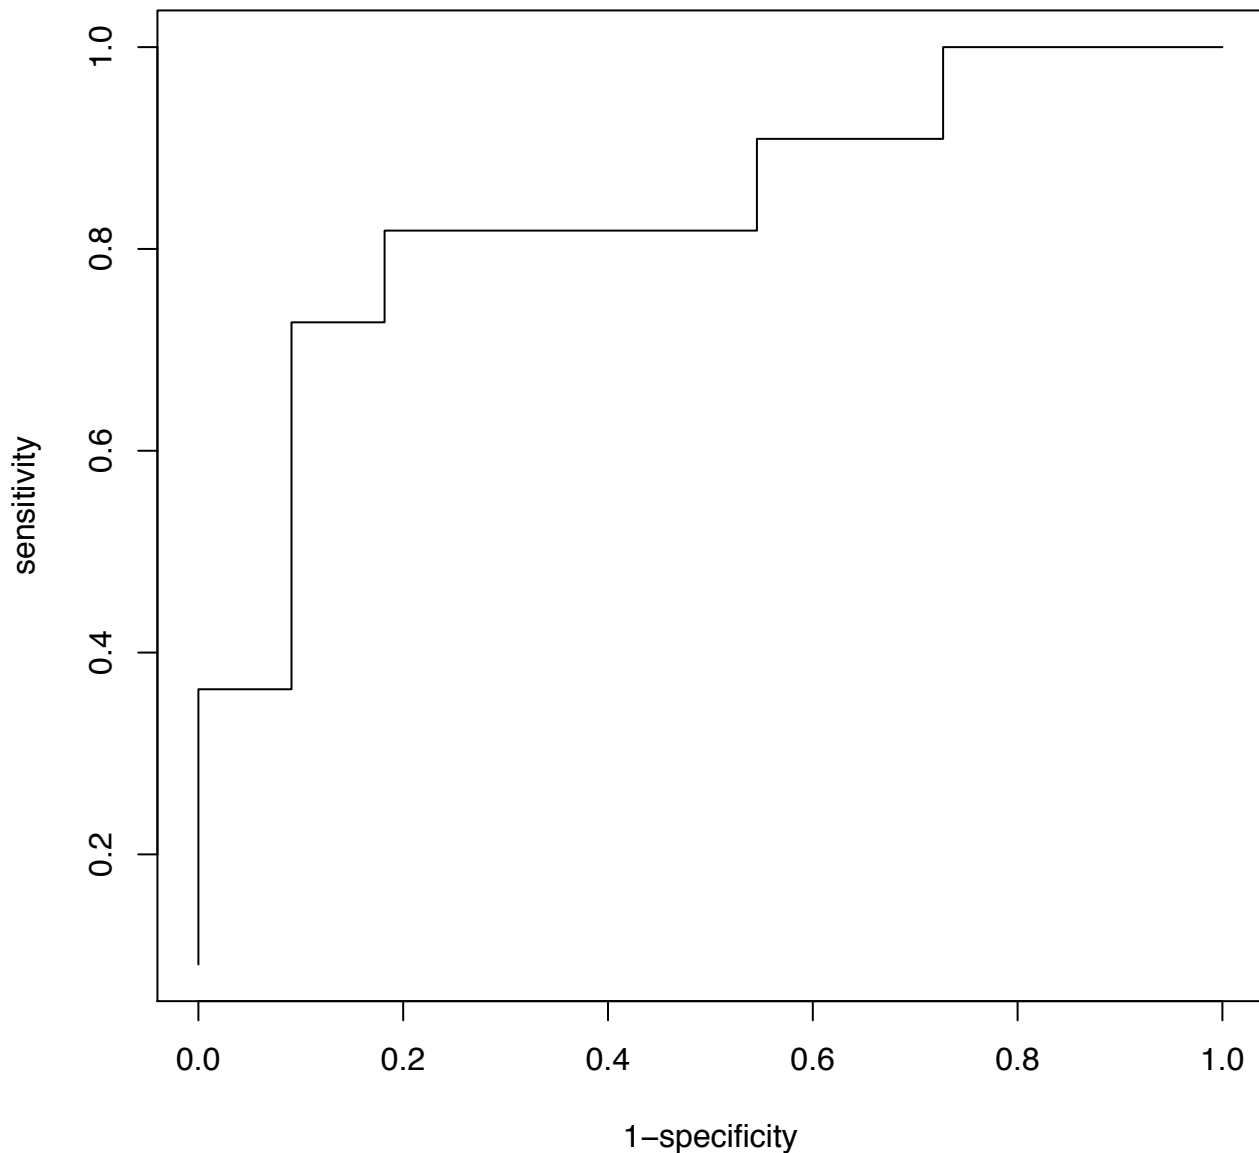

sorlie: Basal vs. LumA . Number of peptides: NA  
ROC area = 0.79 p-value = 0.0096

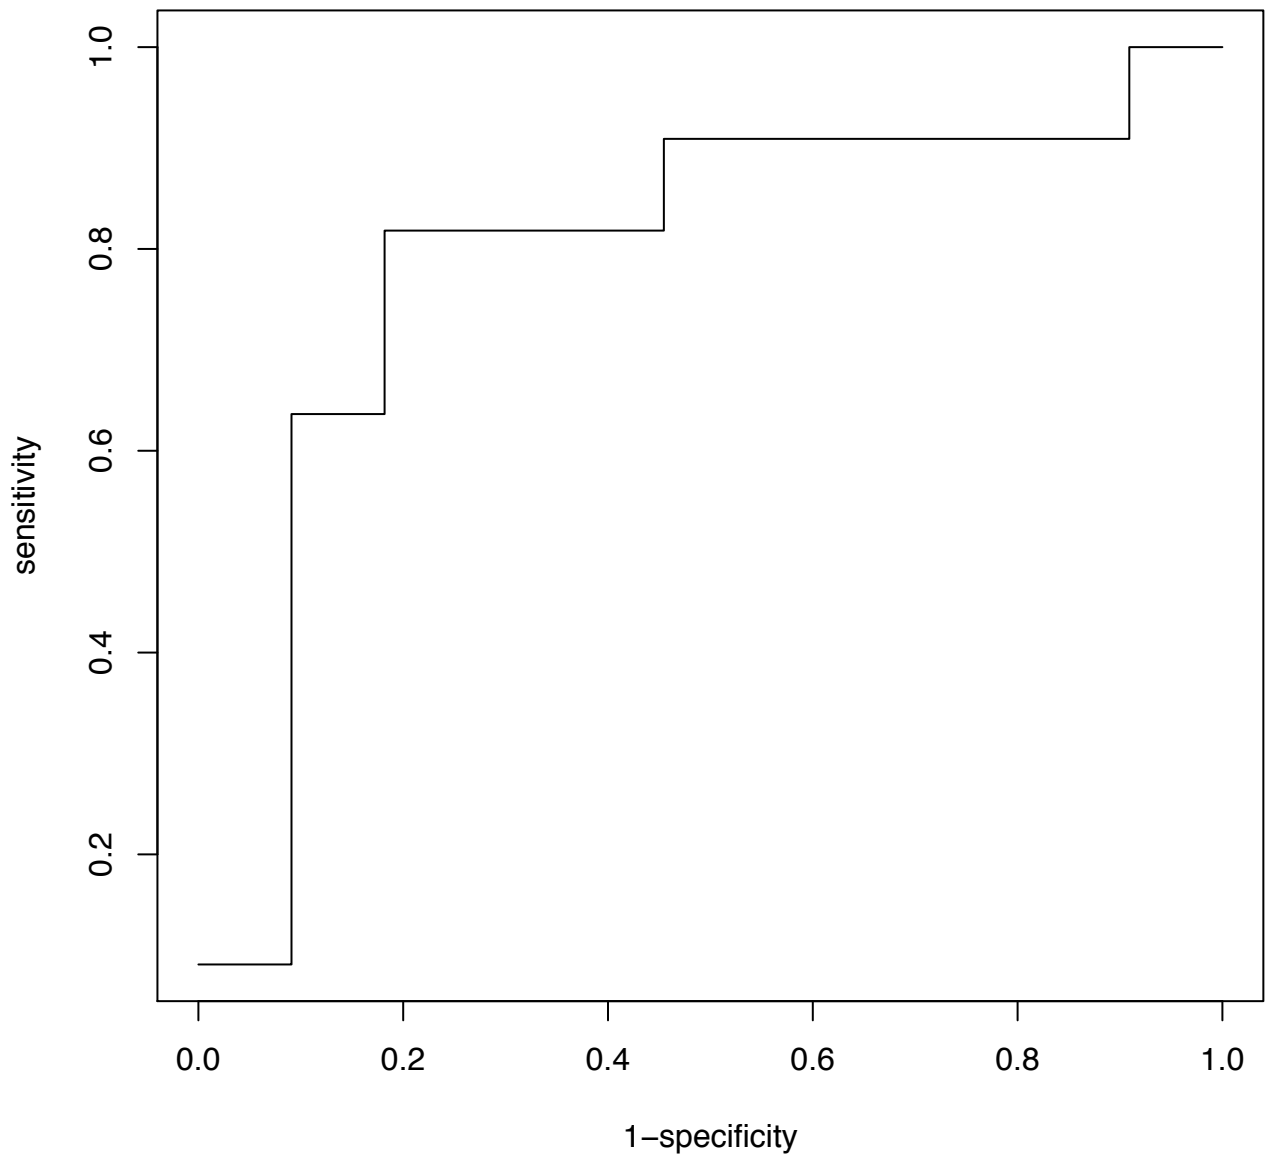

pam50: Basal vs. LumA . Number of peptides: 20

ROC area = 0.92 p-value = 0.00094

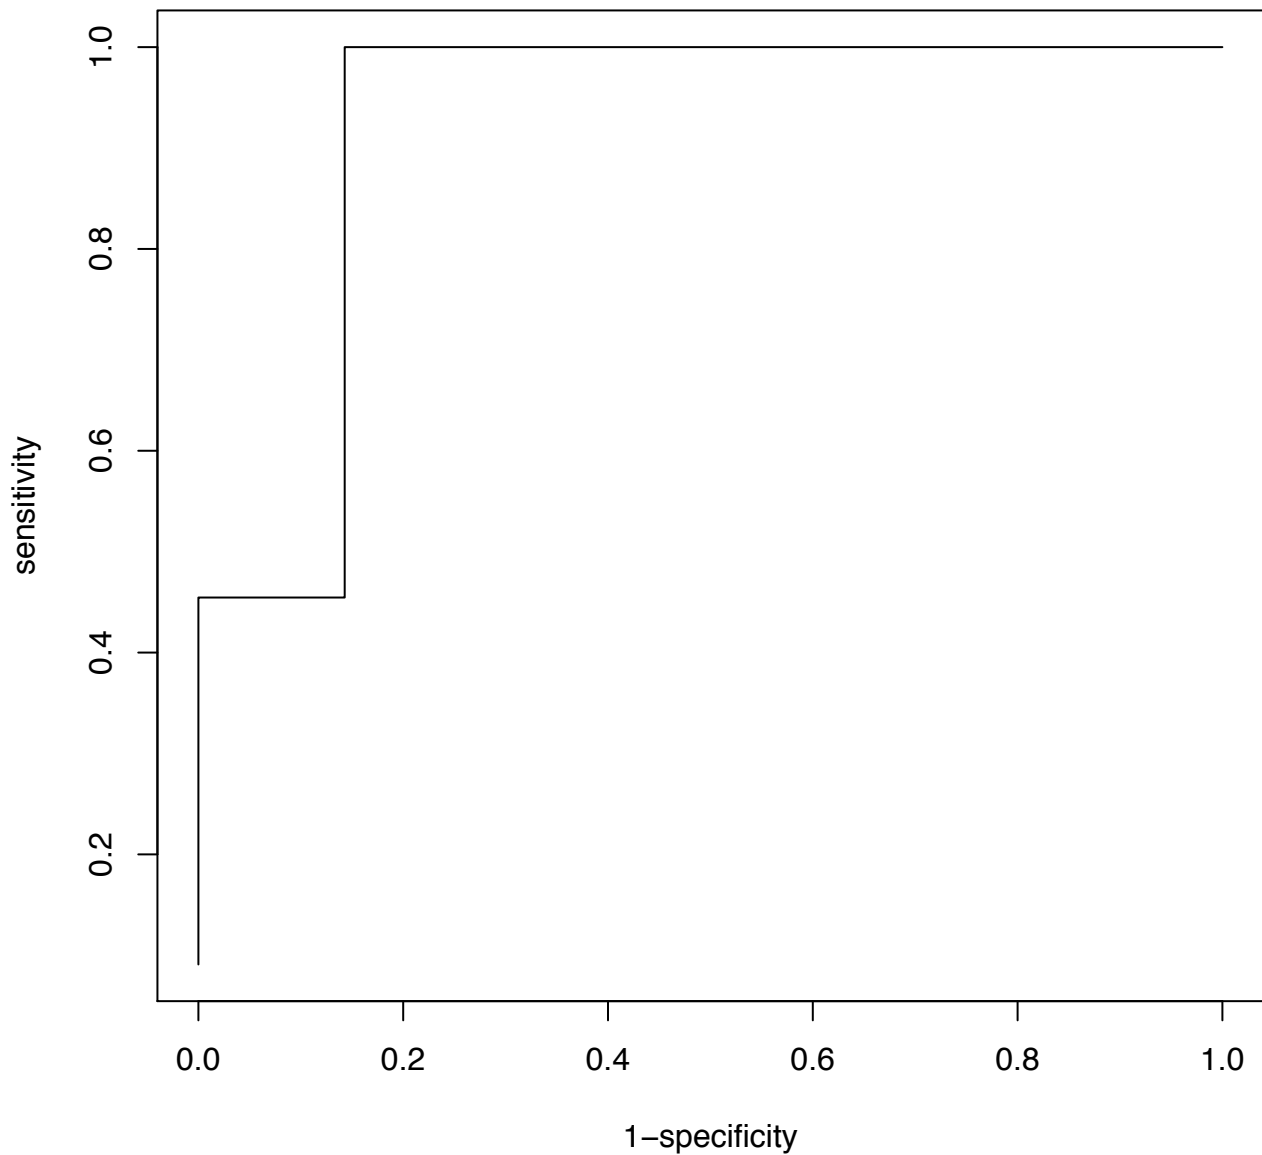

pam50: Basal vs. LumA . Number of peptides: 30

ROC area = 0.87 p-value = 0.0041

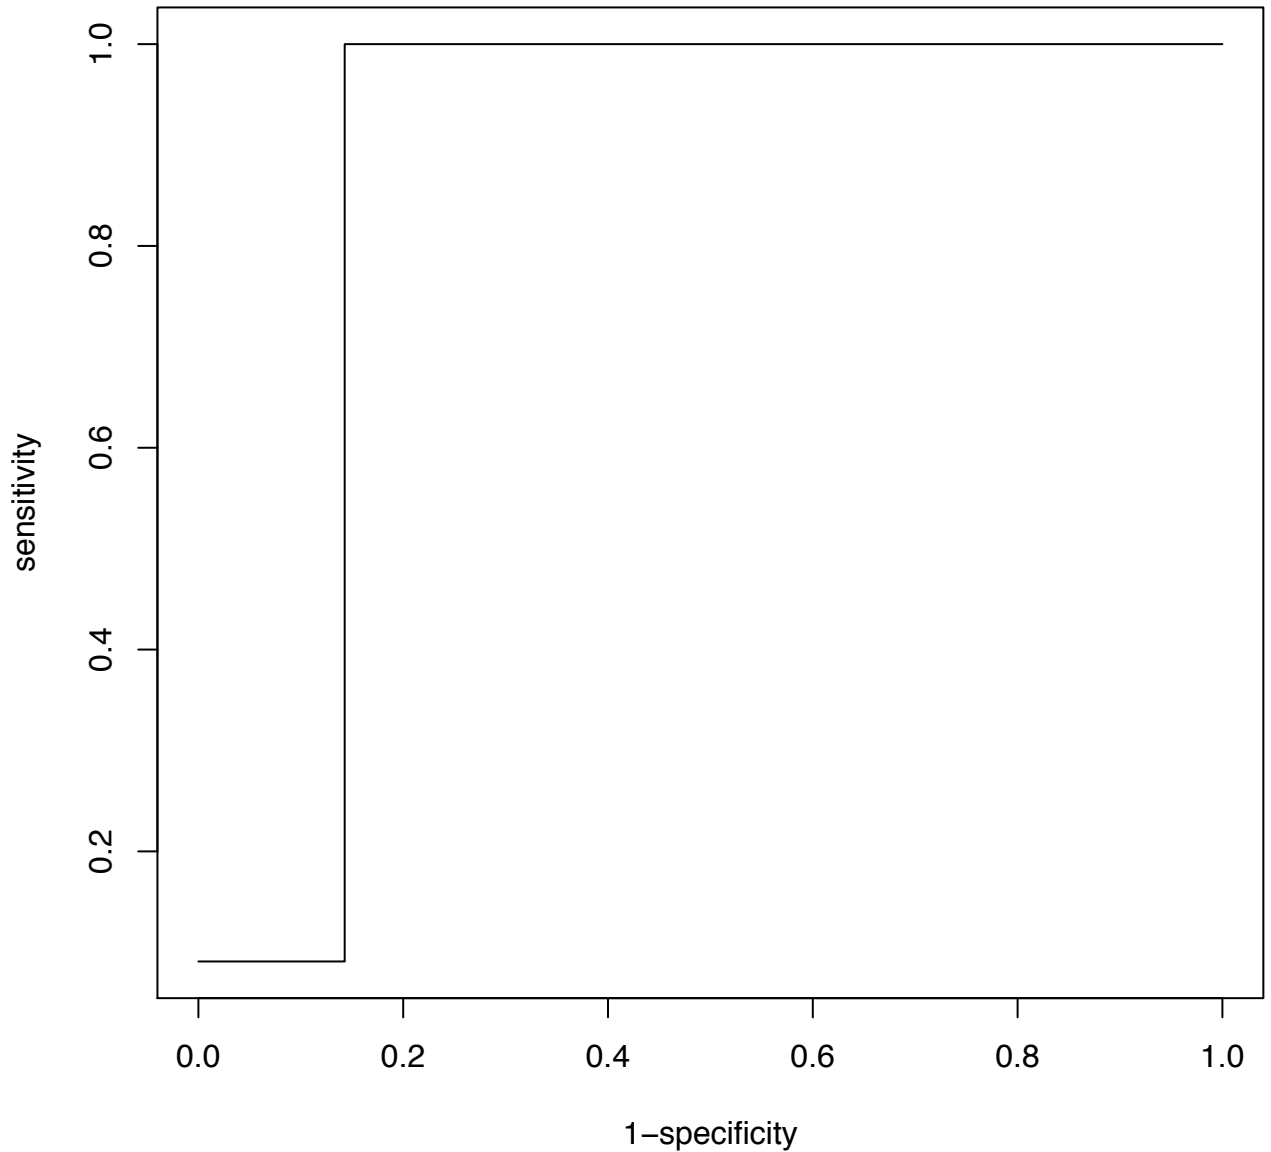

pam50: Basal vs. LumA . Number of peptides: 40

ROC area = 0.95 p-value = 0.00038

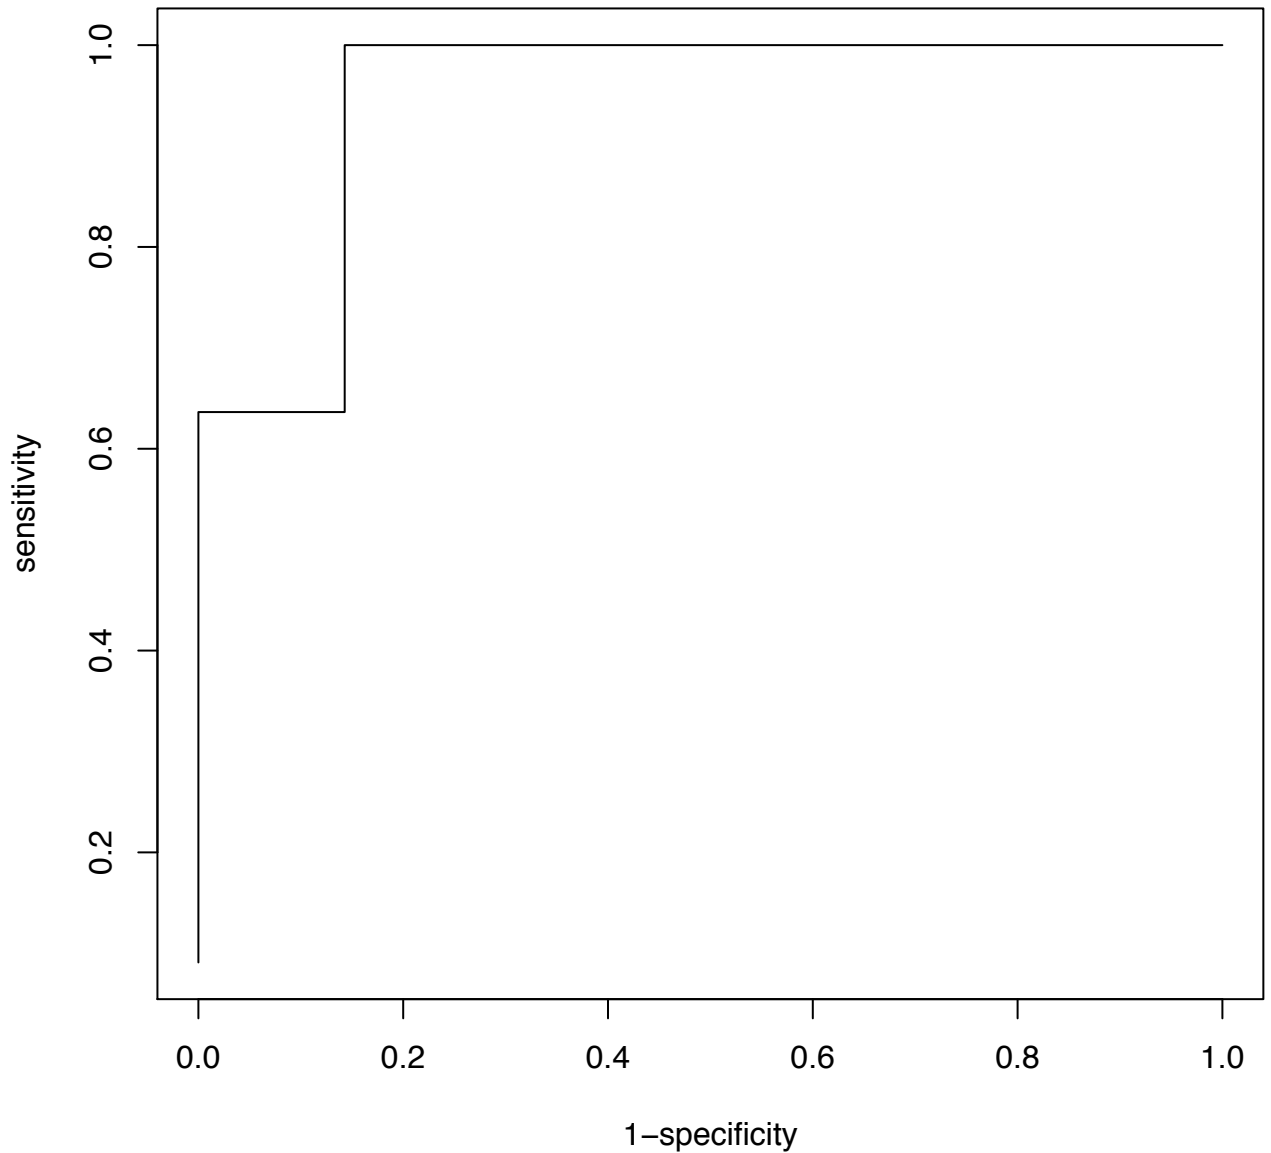

pam50: Basal vs. LumA . Number of peptides: 100  
ROC area = 0.87 p-value = 0.0041

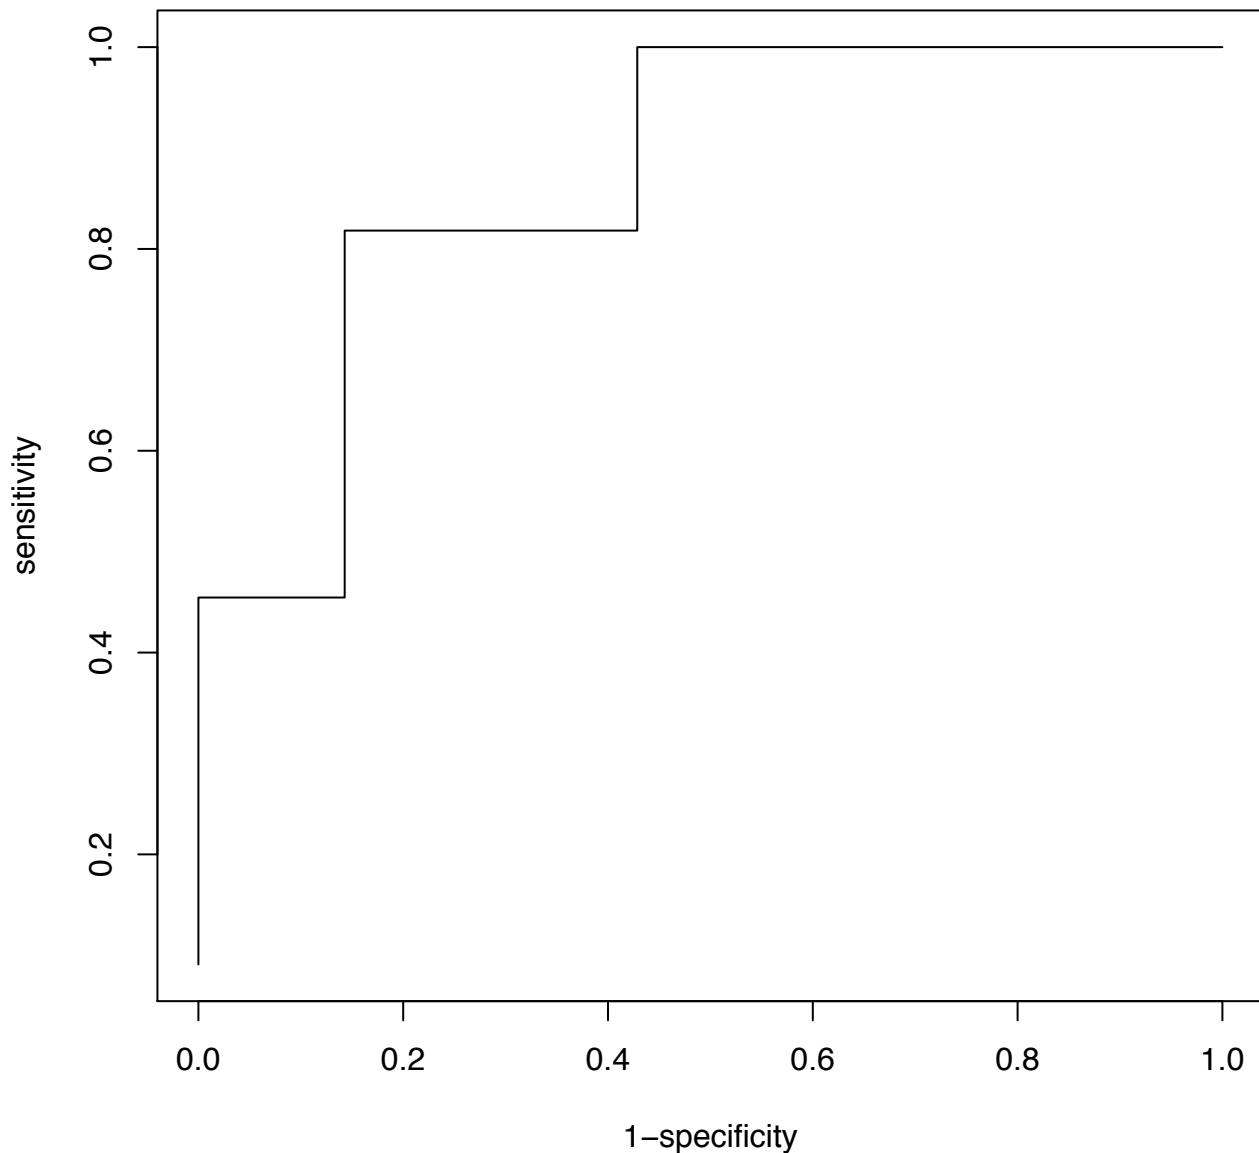



pam50: Basal vs. LumA . Number of peptides: NA  
ROC area = 0.88 p-value = 0.003

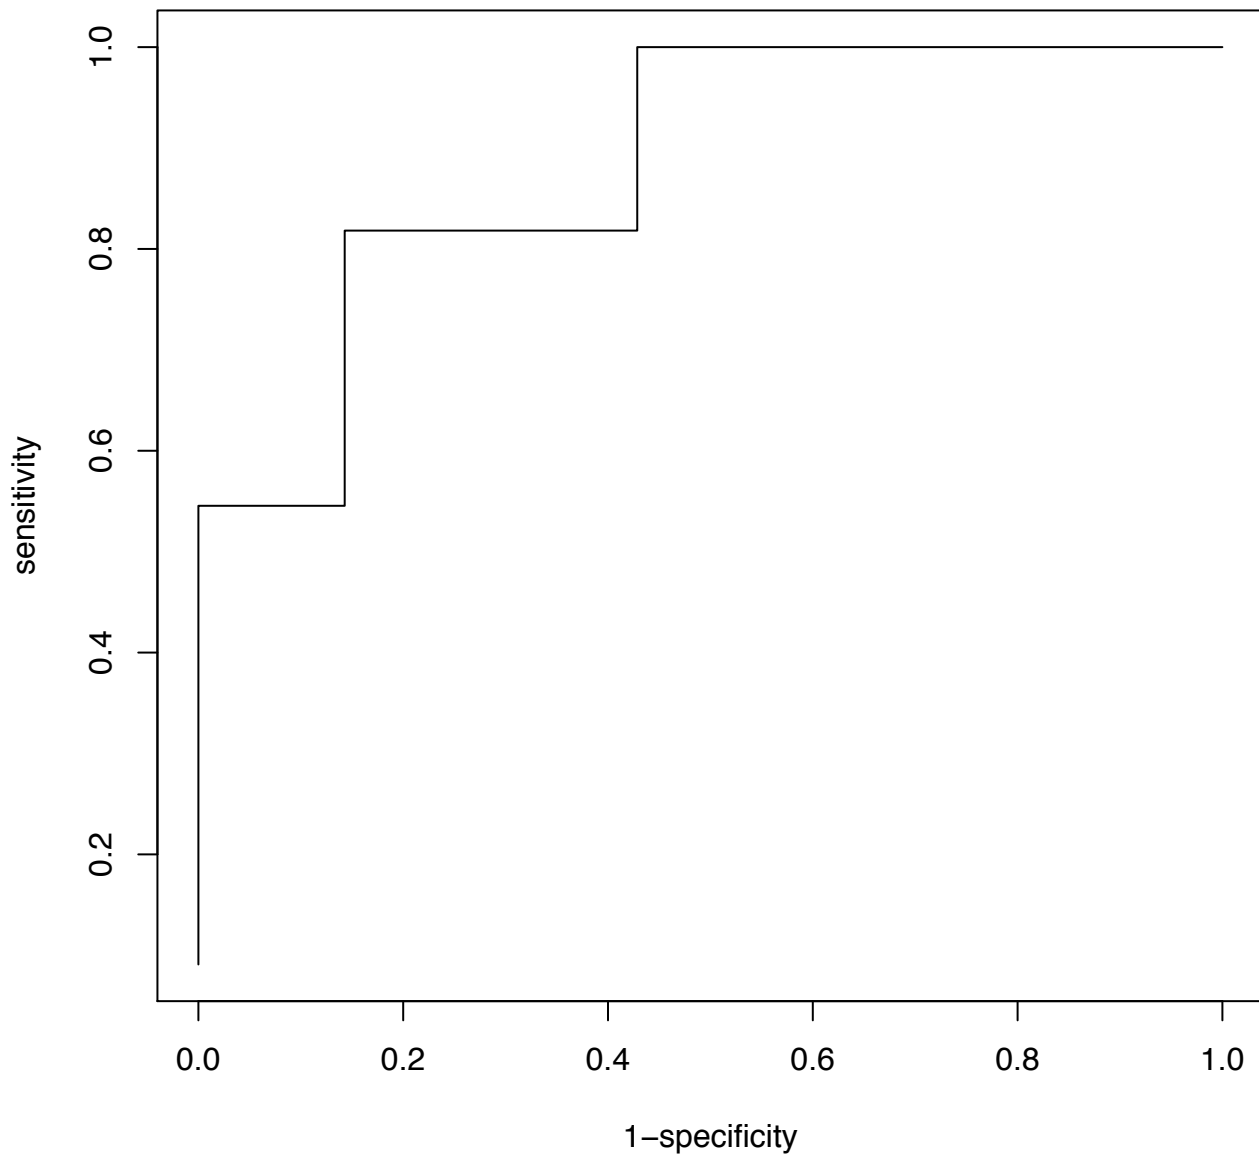

hu: Basal vs. LumA . Number of peptides: 20

ROC area = 0.92 p-value =  $8.3e-05$

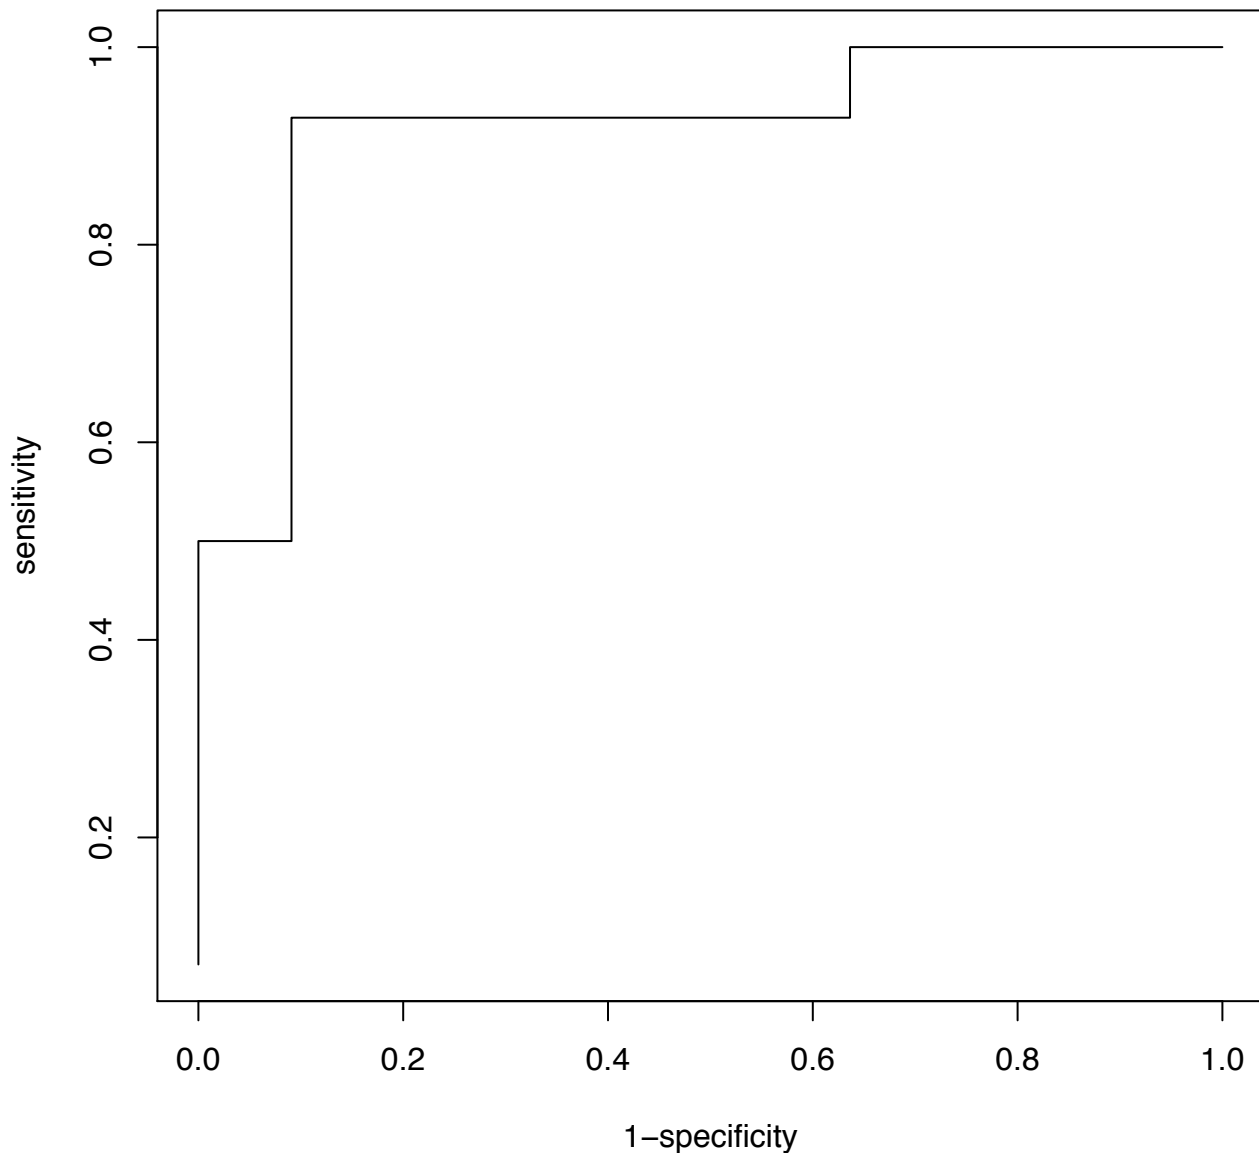

hu: Basal vs. LumA . Number of peptides: 30

ROC area = 0.92 p-value =  $6.1 \times 10^{-5}$

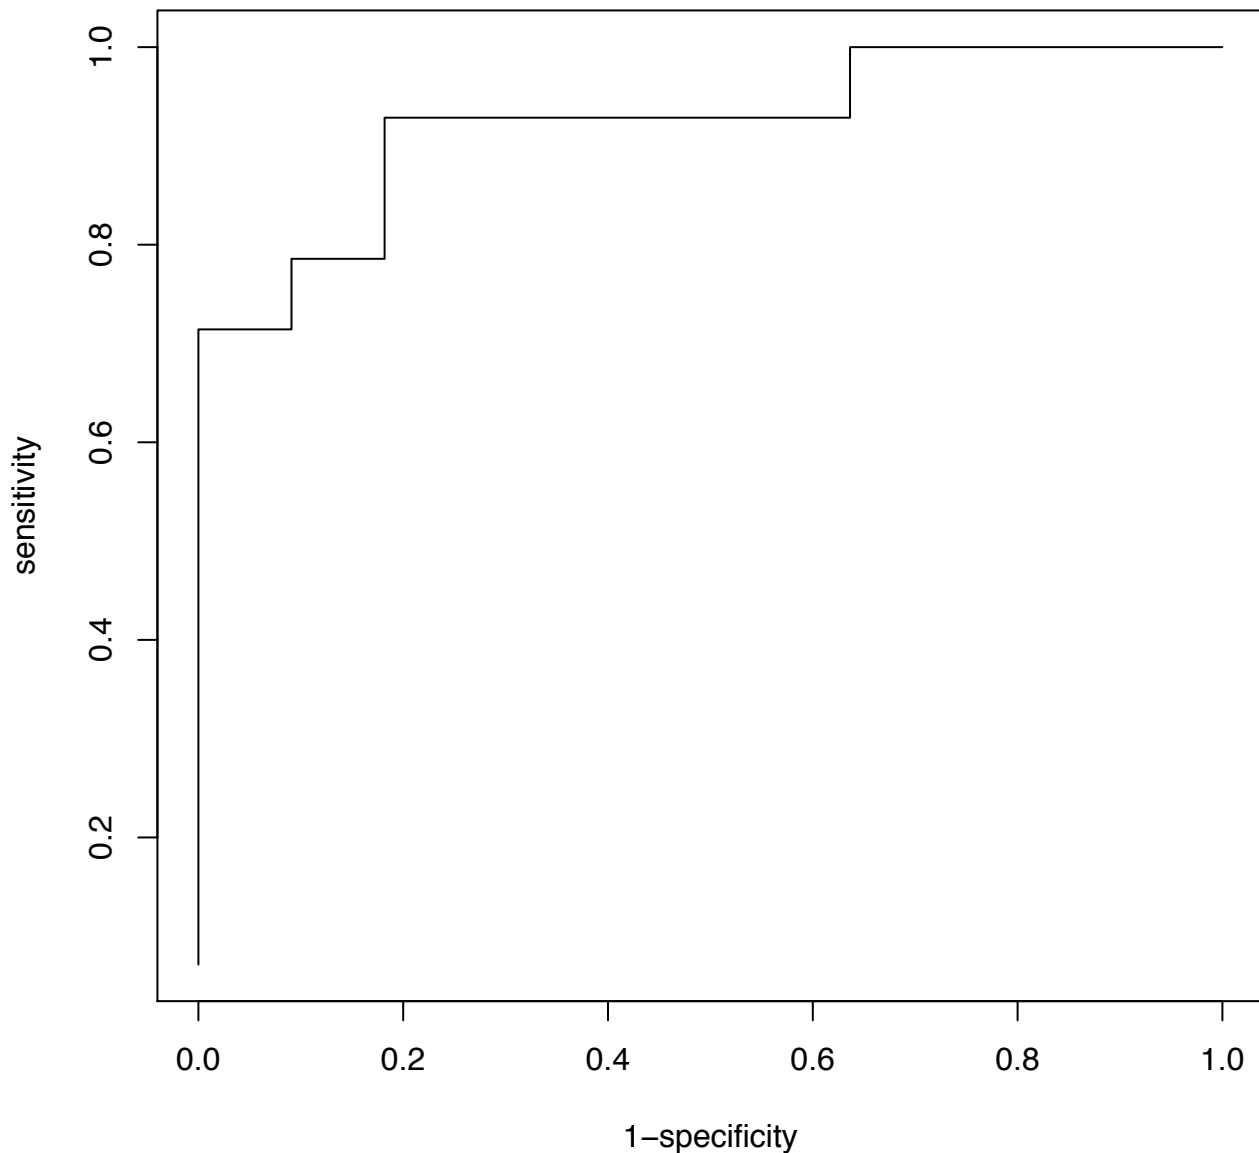

hu: Basal vs. LumA . Number of peptides: 40

ROC area = 0.94 p-value =  $3.1 \times 10^{-5}$

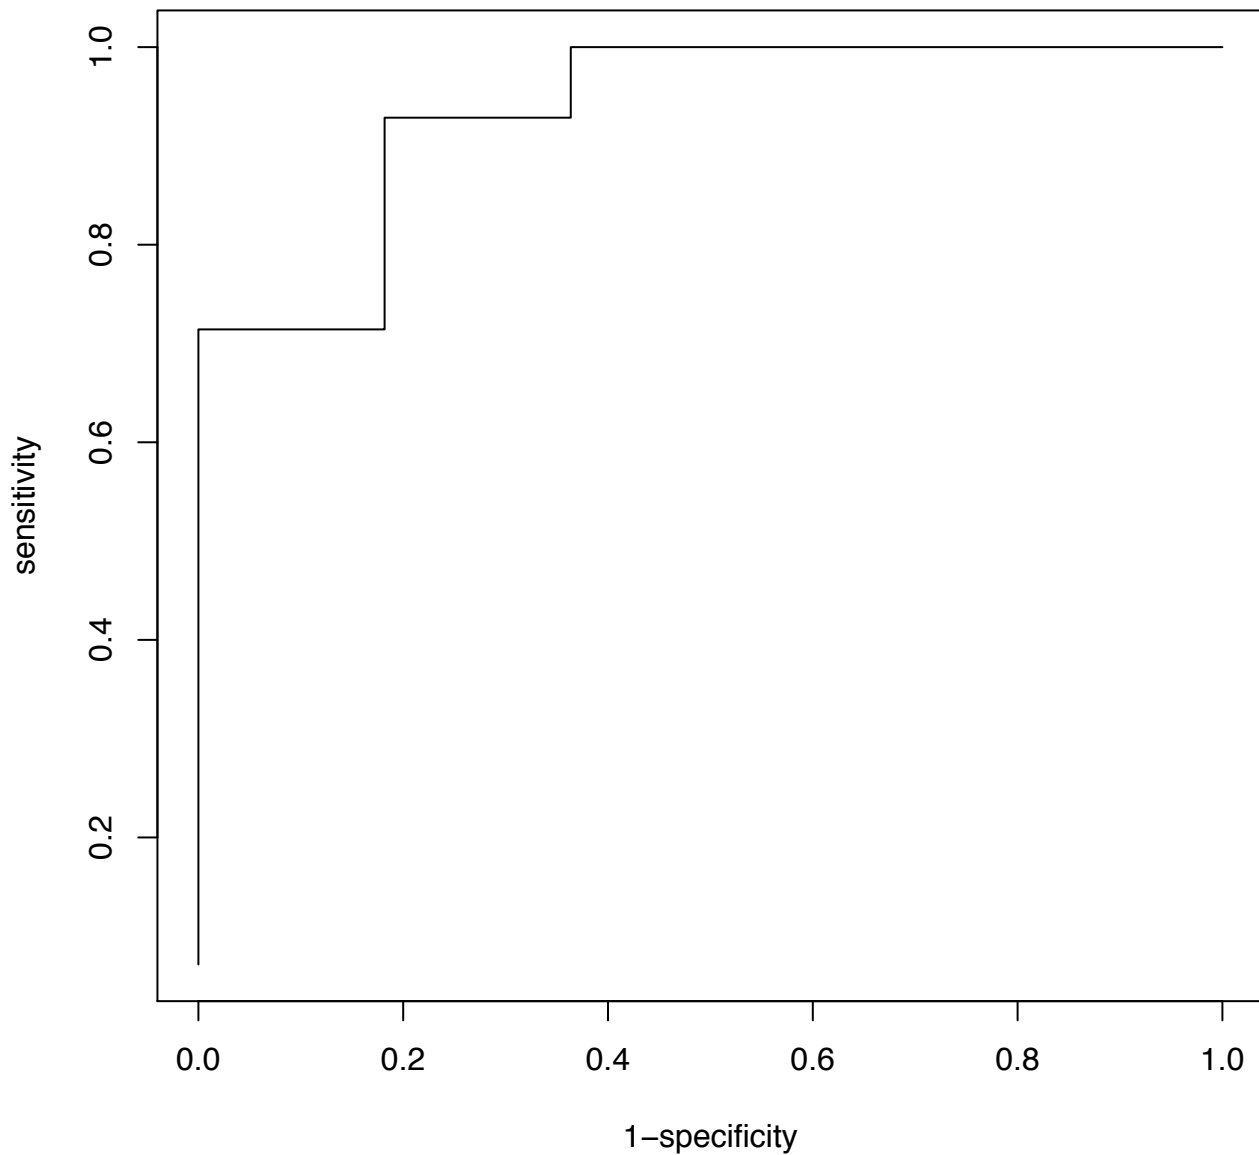

hu: Basal vs. LumA . Number of peptides: 100

ROC area = 0.94 p-value =  $3.1 \times 10^{-5}$

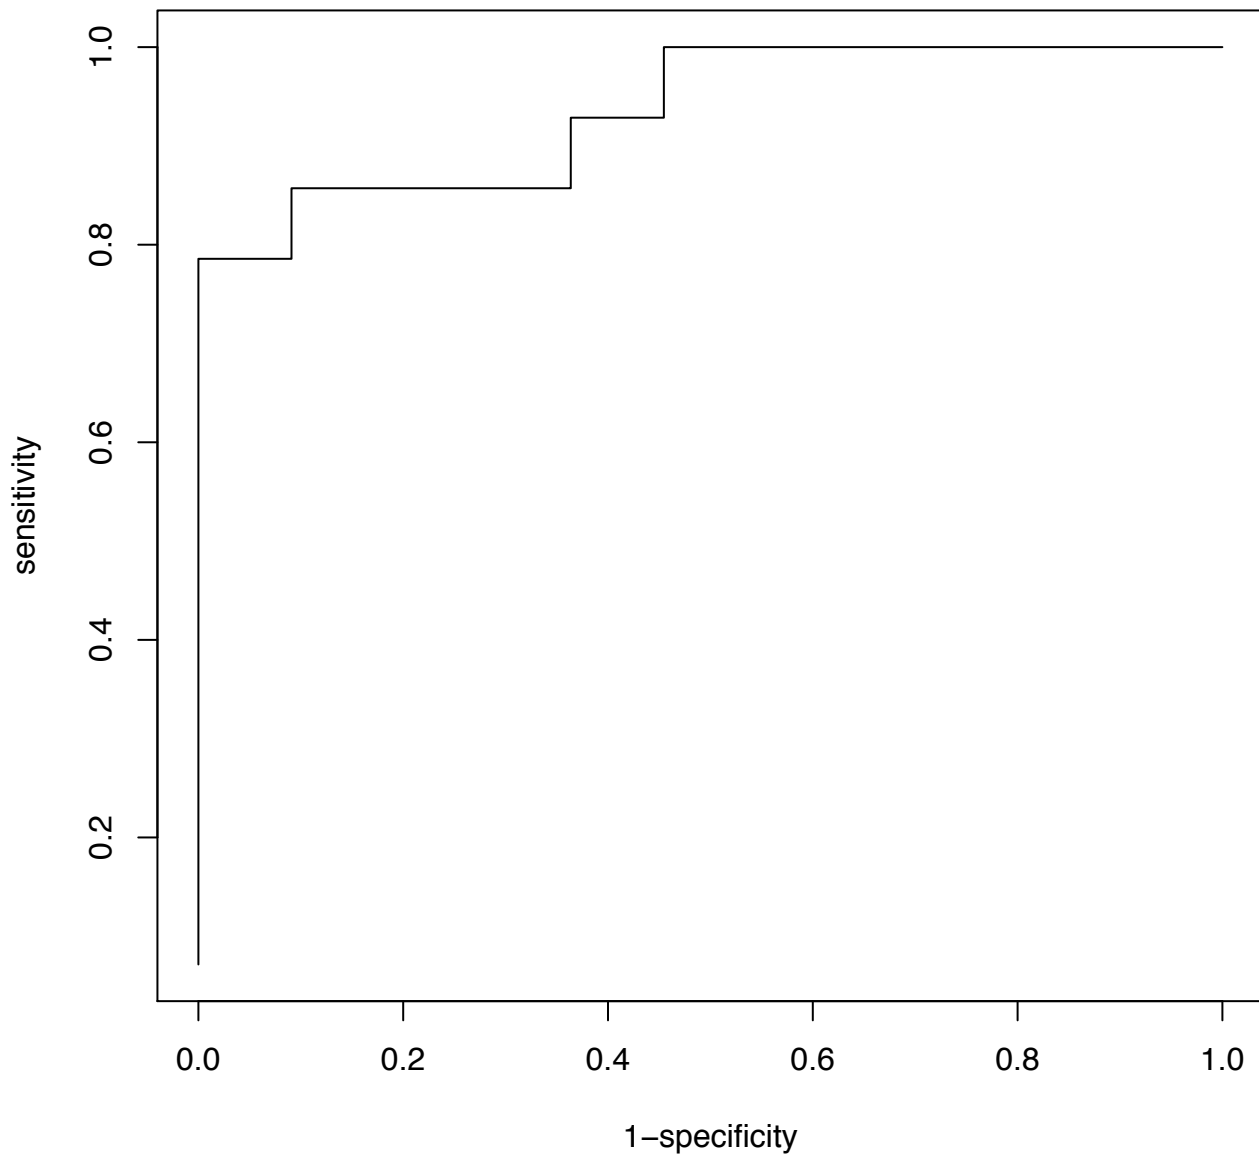

hu: Basal vs. LumA . Number of peptides: NA

ROC area = 0.88 p-value = 0.00044

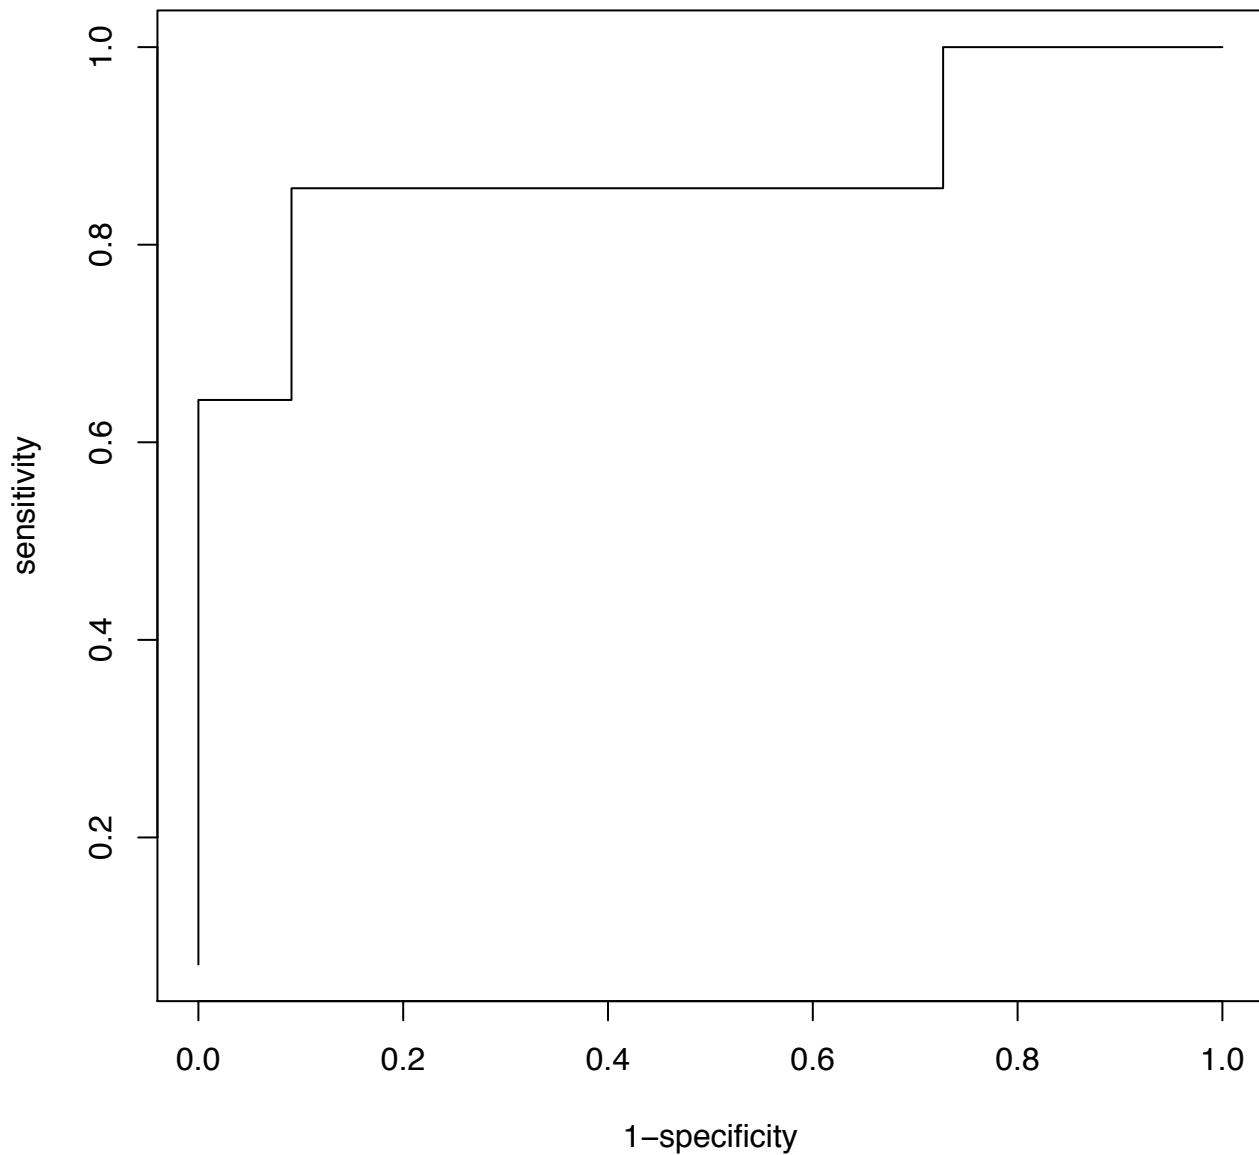

sortie: Basal vs. LumB . Number of peptides: 20  
ROC area = 0.57 p-value = 0.38

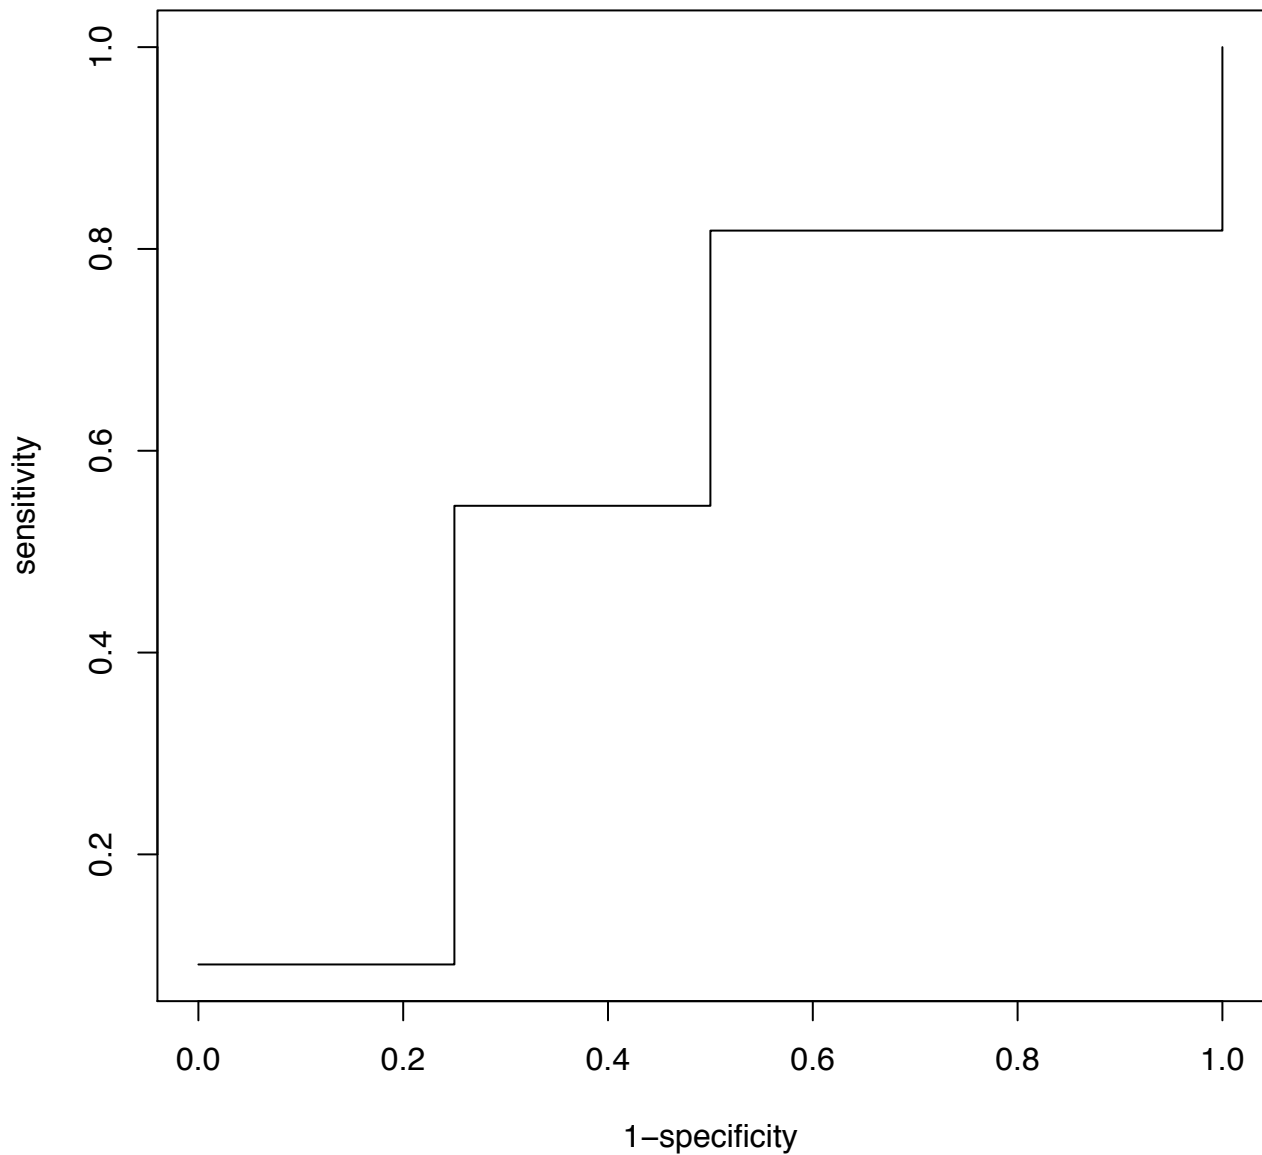

sortie: Basal vs. LumB . Number of peptides: 30

ROC area = 0.61 p-value = 0.29

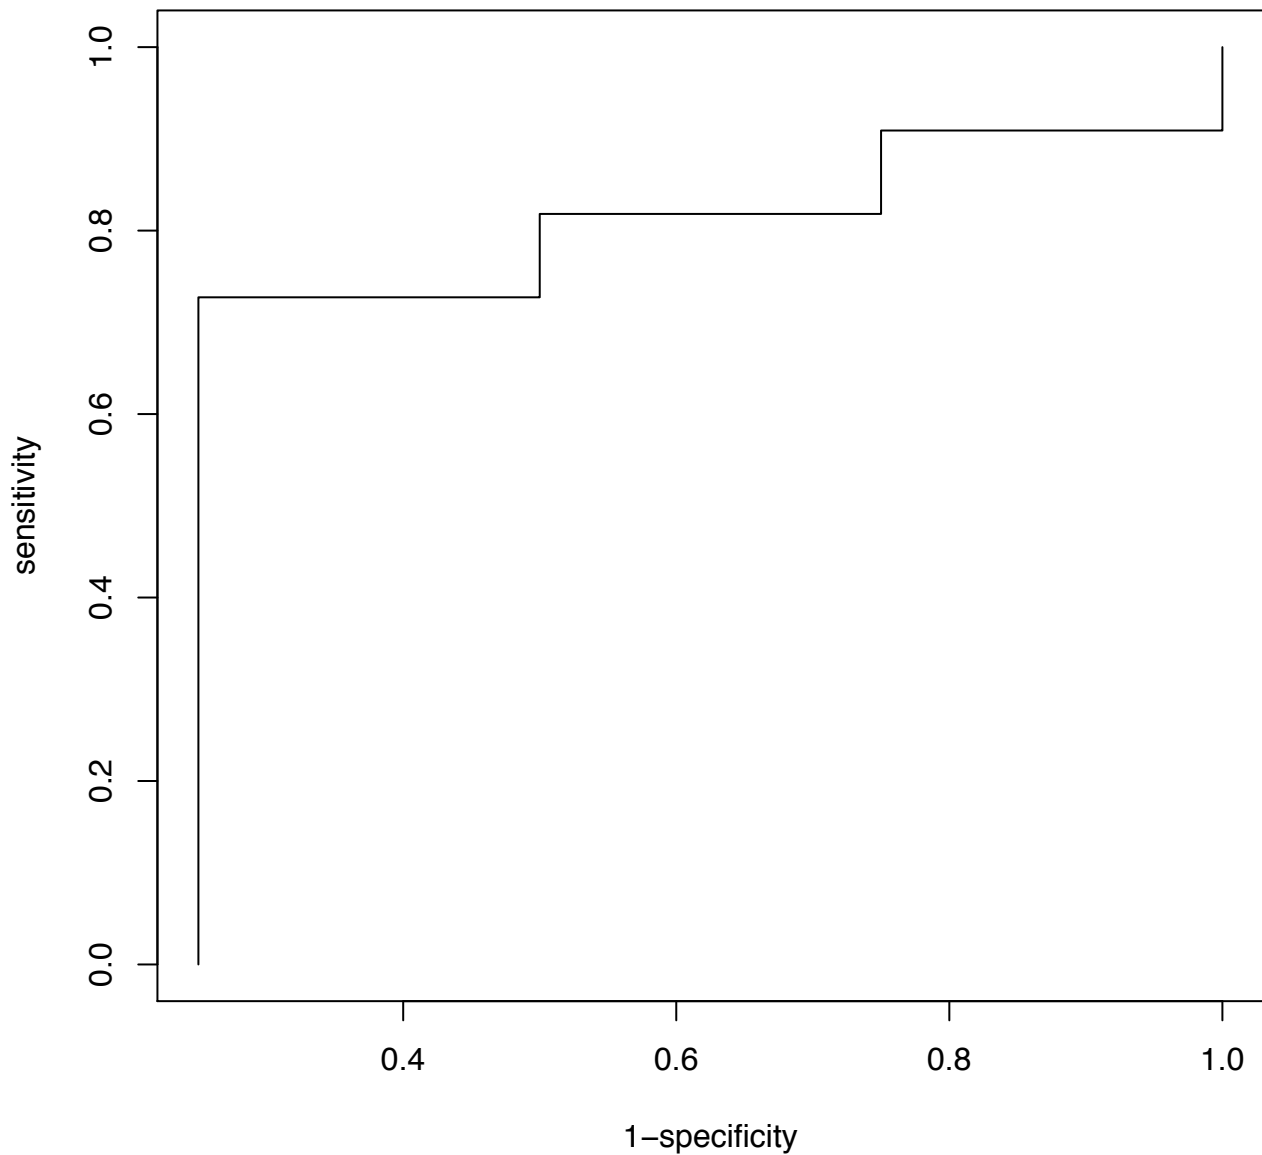



sortie: Basal vs. LumB . Number of peptides: 40  
ROC area = 0.59 p-value = 0.33

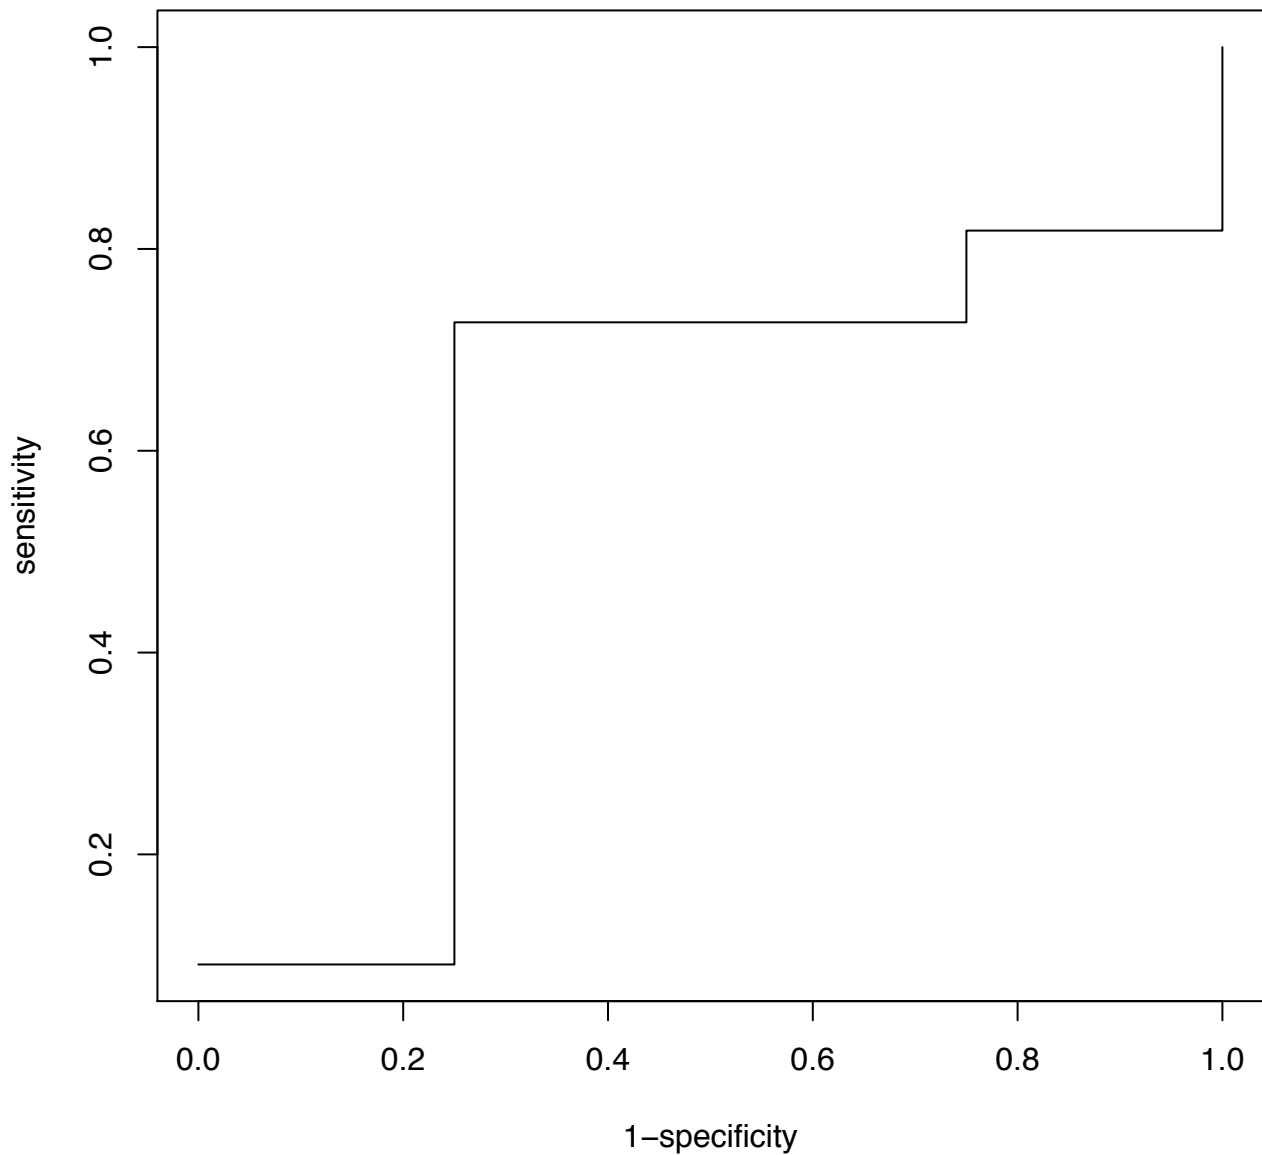

sorlie: Basal vs. LumB . Number of peptides: 100

ROC area = 0.61 p-value = 0.29

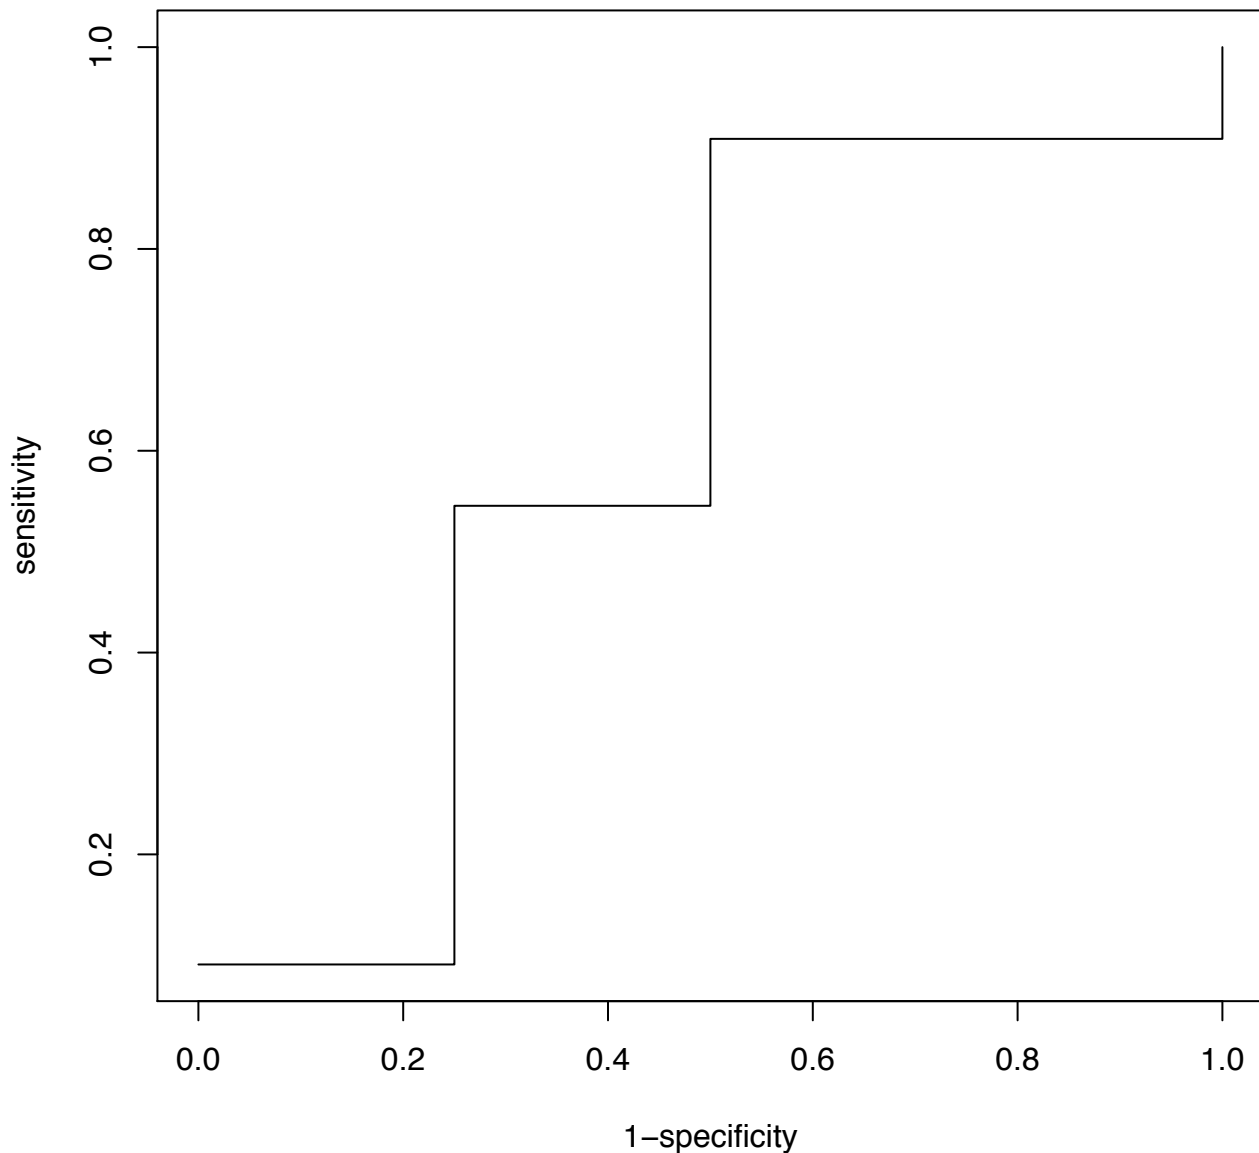

sorlie: Basal vs. LumB . Number of peptides: NA  
ROC area = 0.59 p-value = 0.33

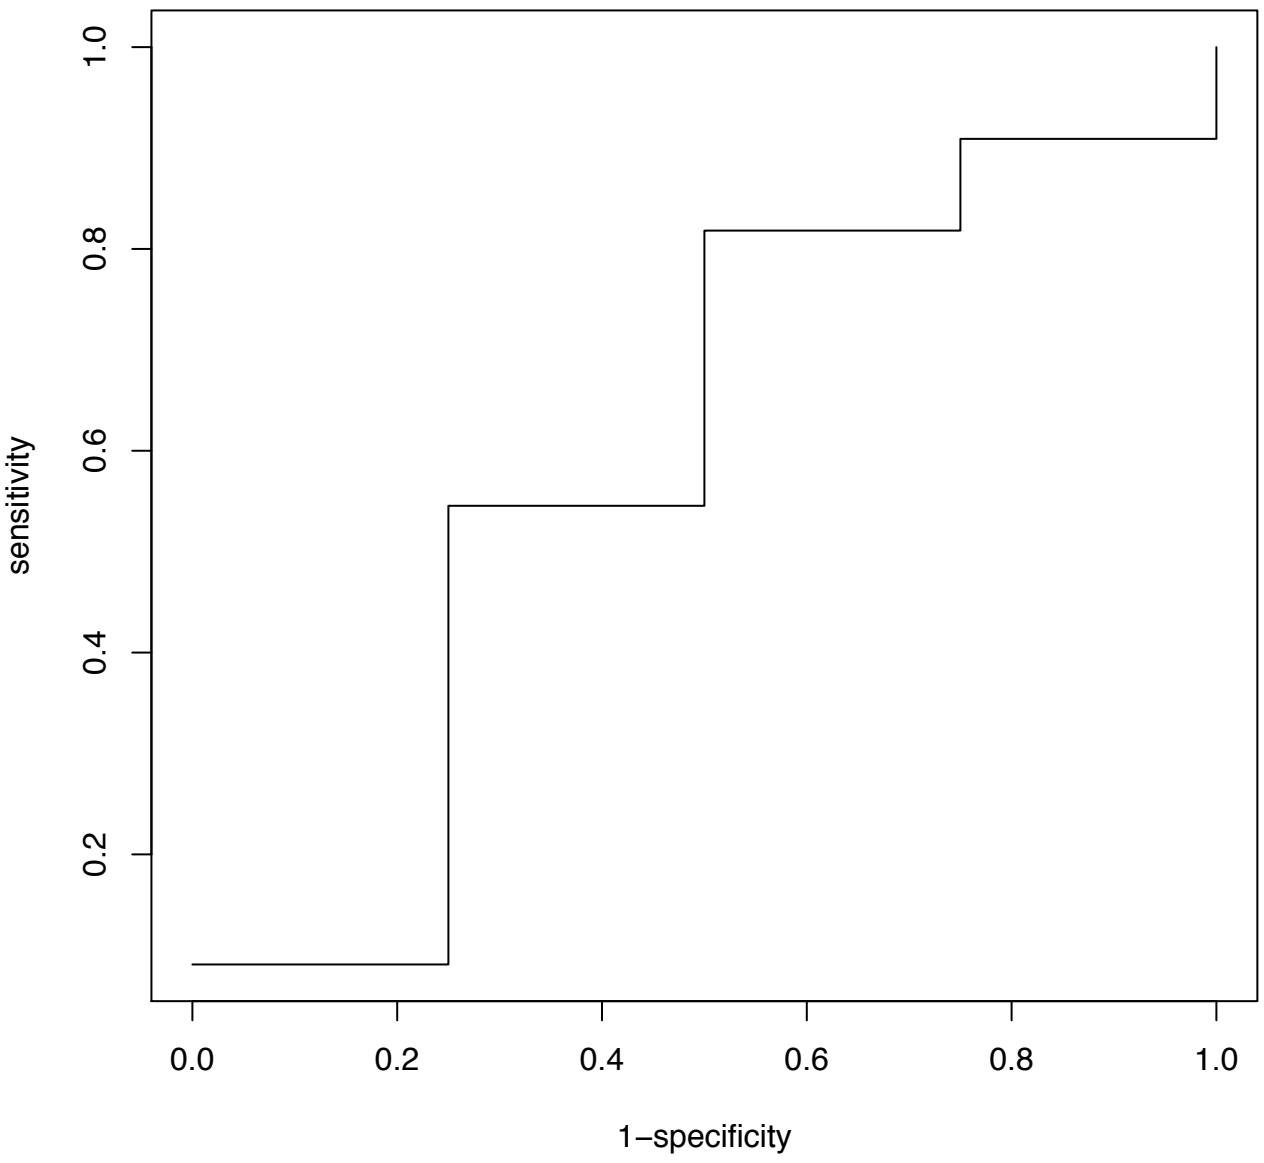

pam50: Basal vs. LumB . Number of peptides: 20  
ROC area = 0.7 p-value = 0.09

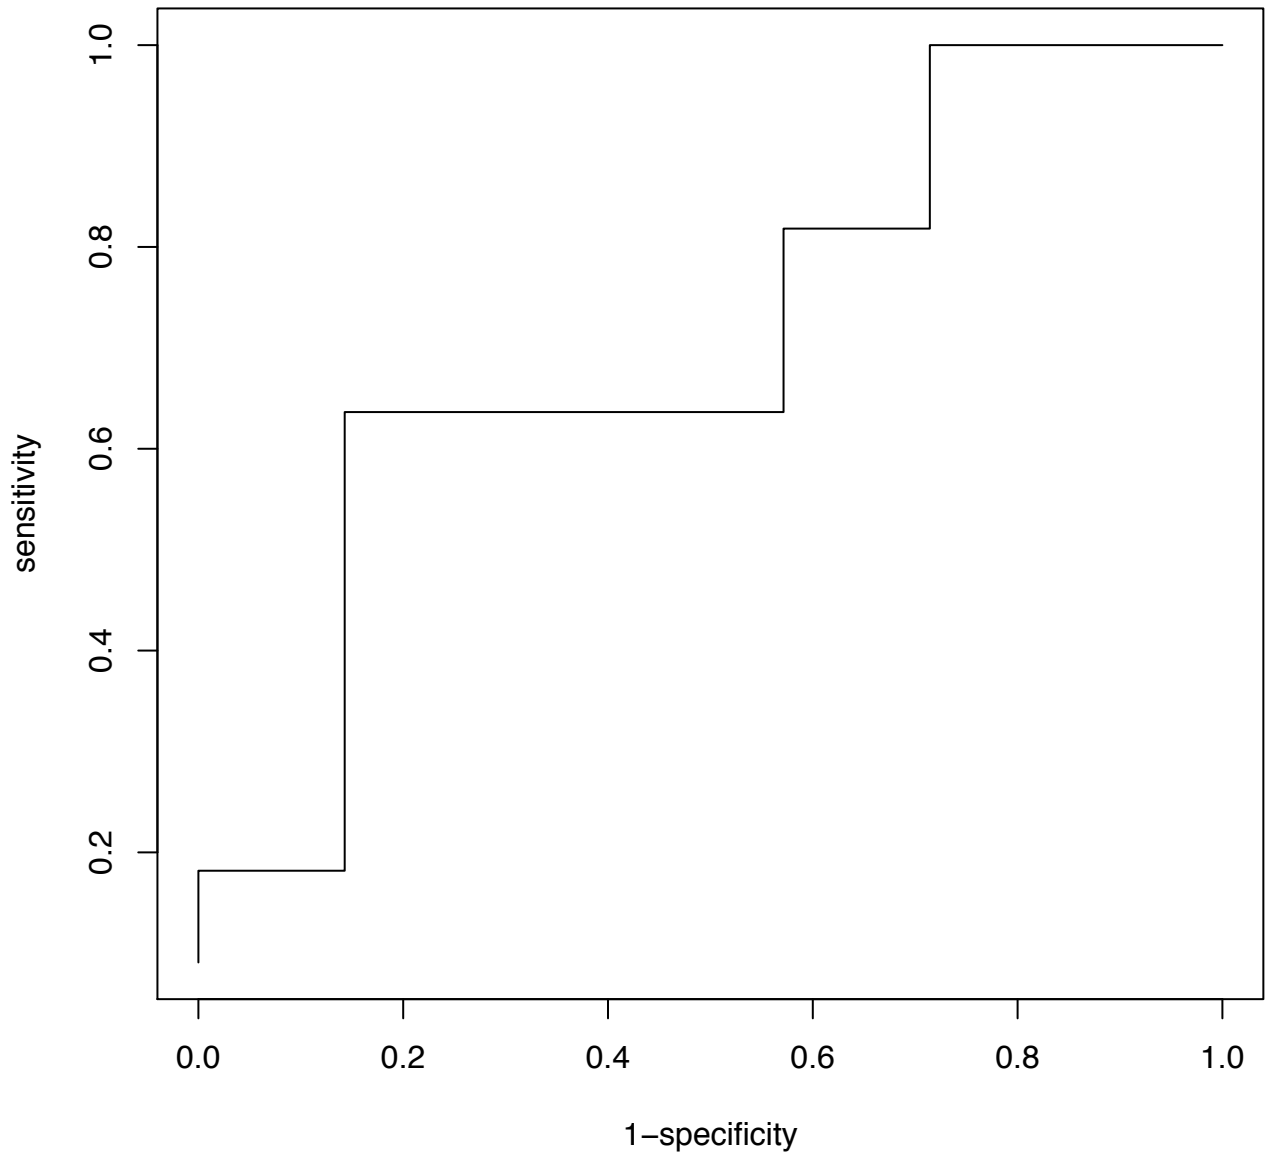

pam50: Basal vs. LumB . Number of peptides: 30

ROC area = 0.71 p-value = 0.075

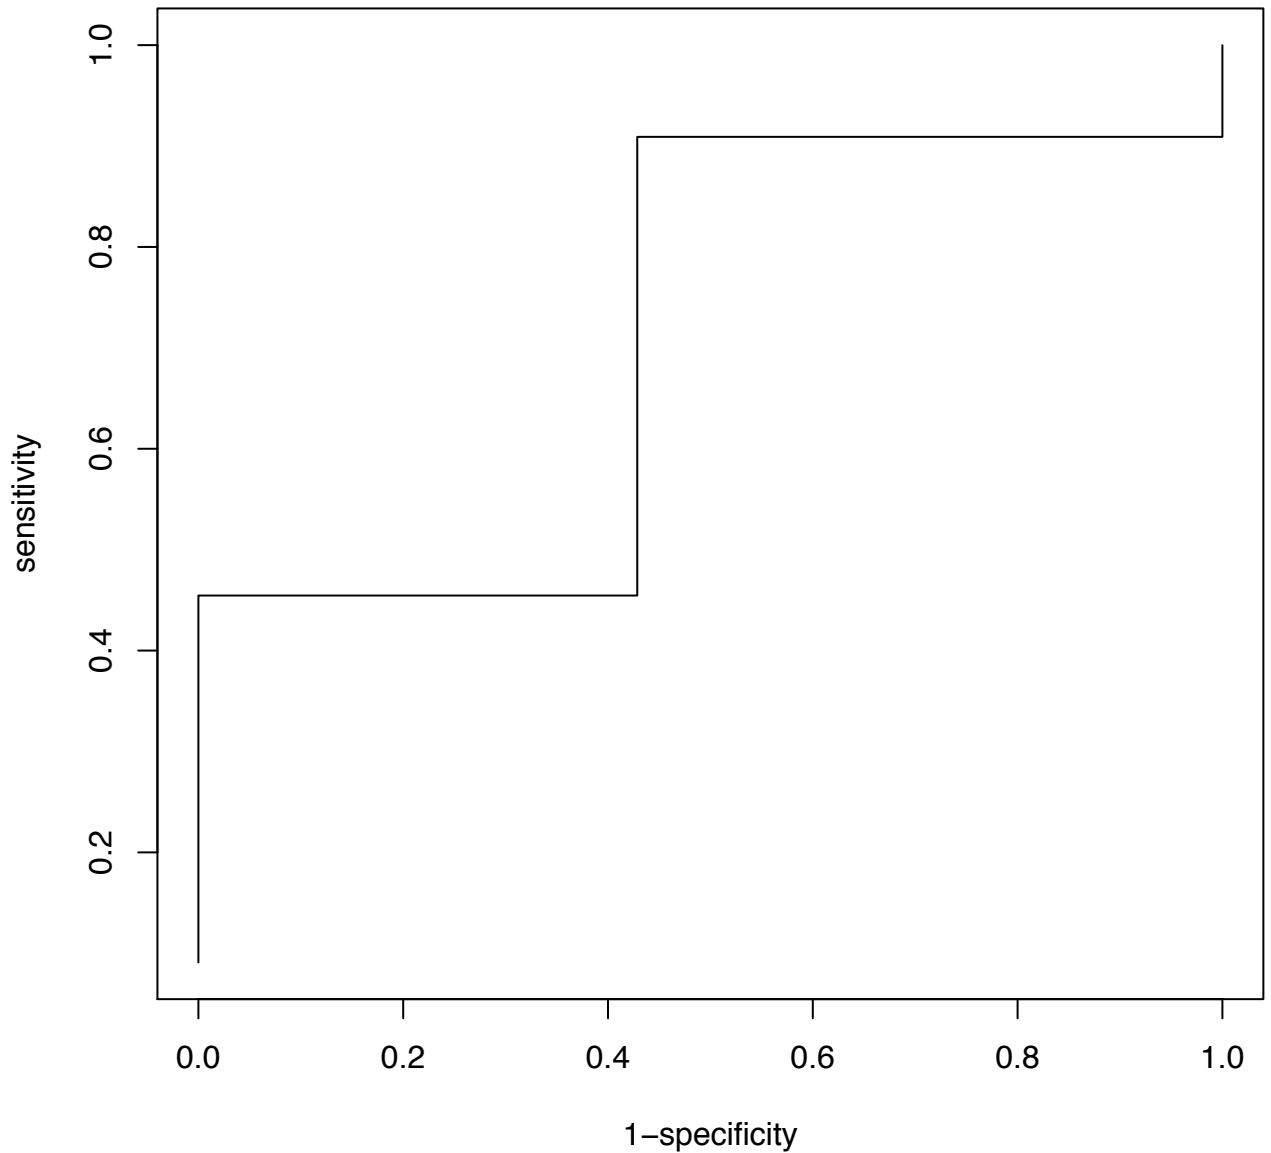

pam50: Basal vs. LumB . Number of peptides: 40

ROC area = 0.73 p-value = 0.063

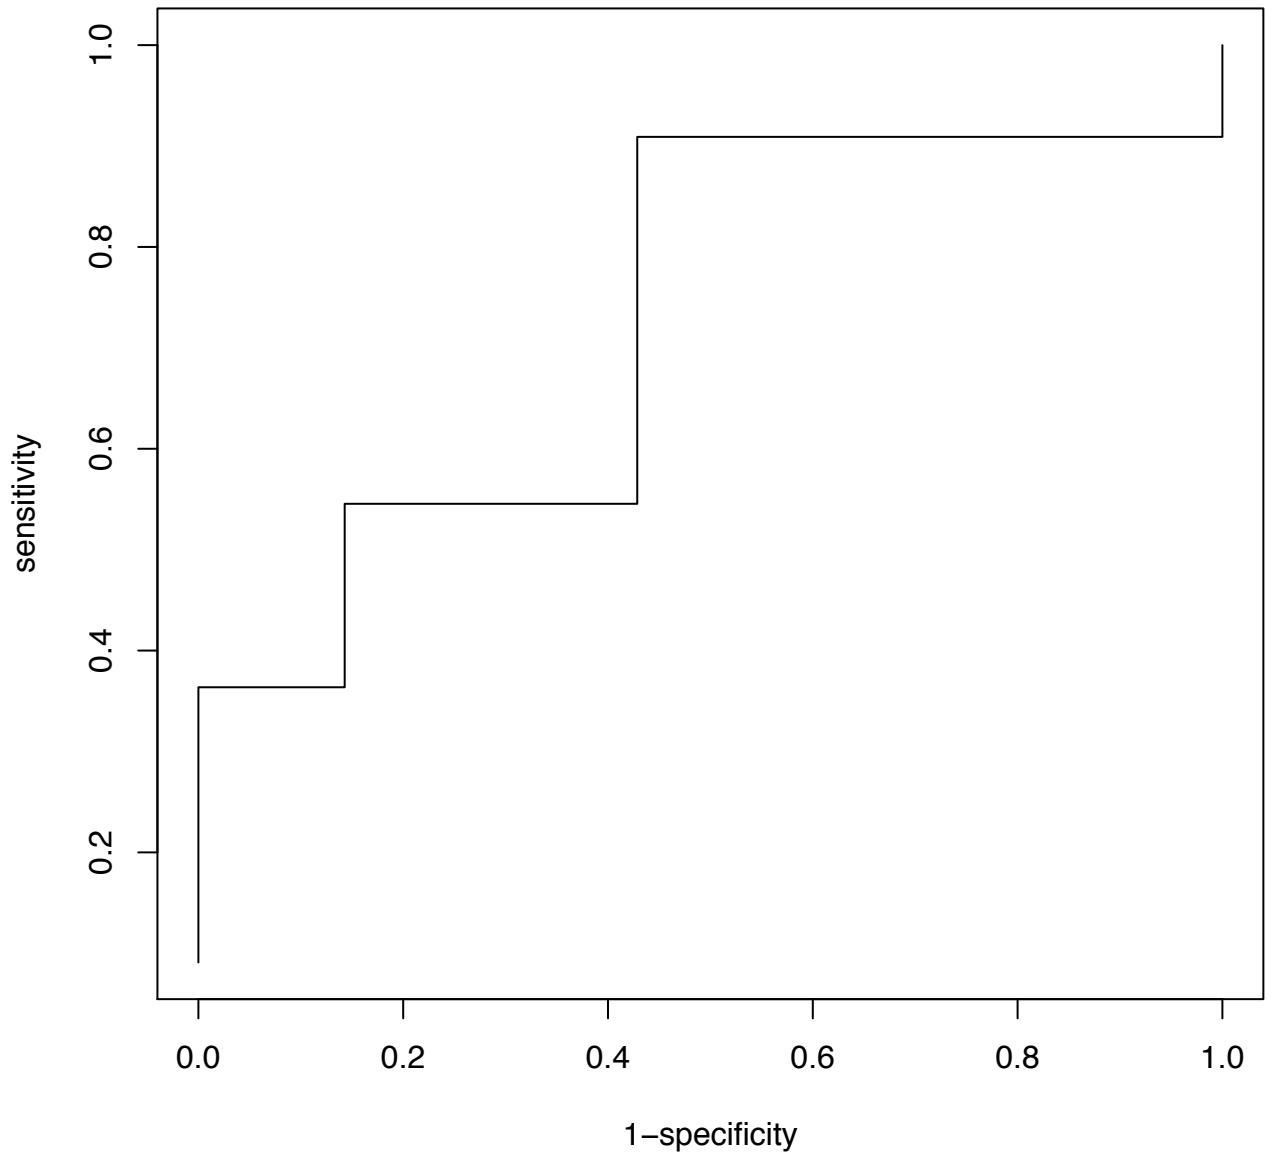

pam50: Basal vs. LumB . Number of peptides: 100

ROC area = 0.61 p-value = 0.24

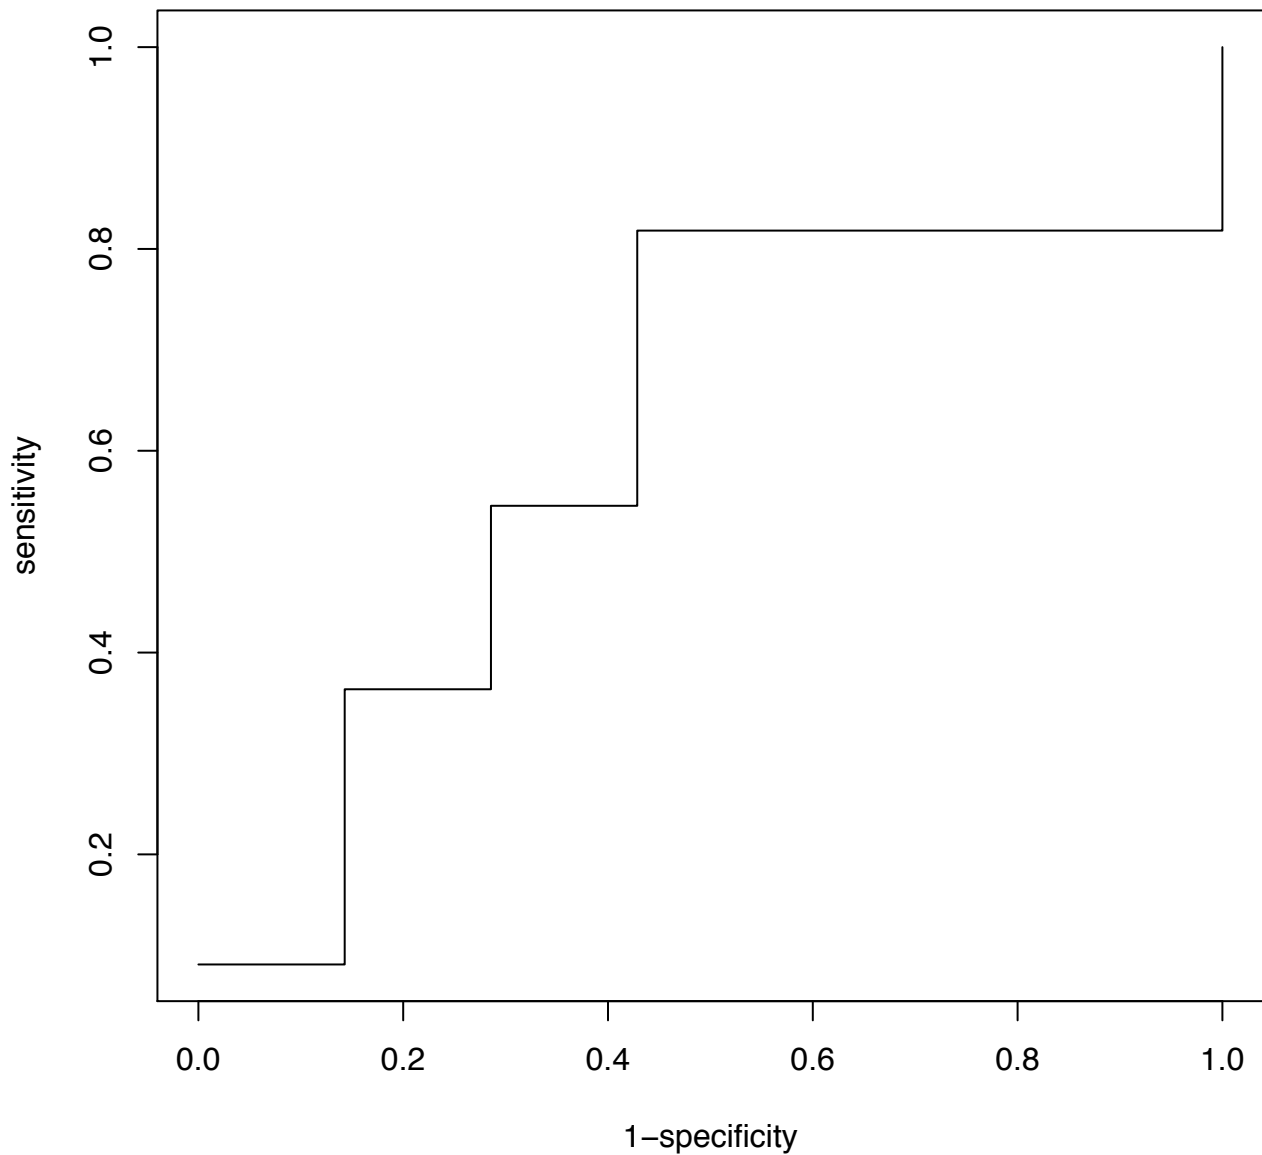

pam50: Basal vs. LumB . Number of peptides: NA  
ROC area = 0.62 p-value = 0.21

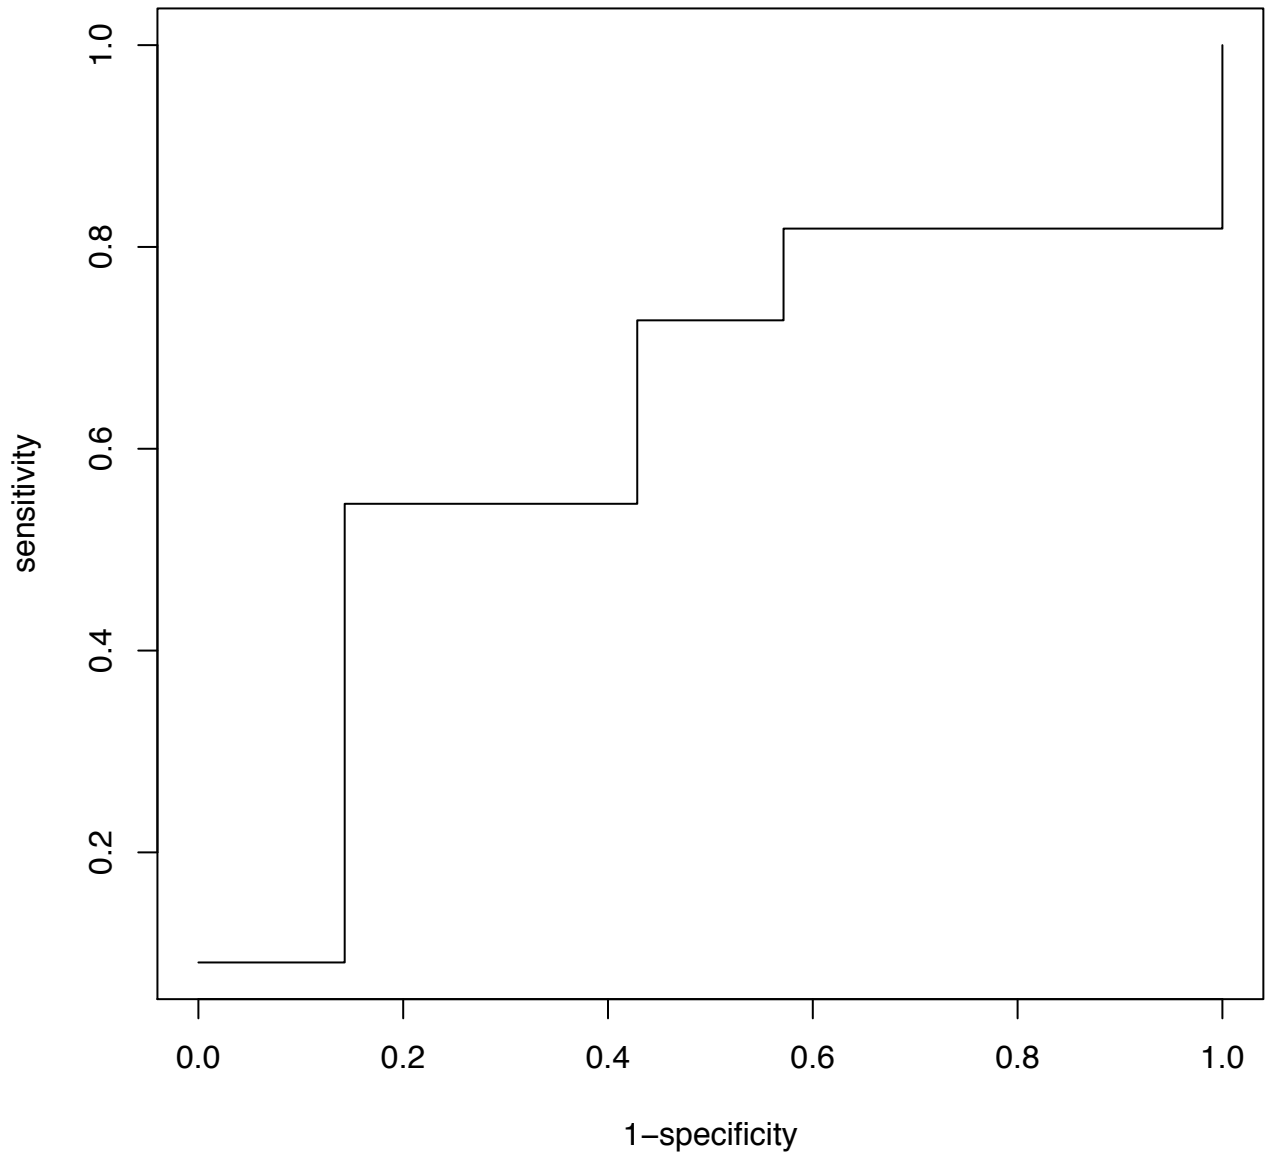



hu: Basal vs. LumB . Number of peptides: 20

ROC area = 0.82 p-value = 0.031

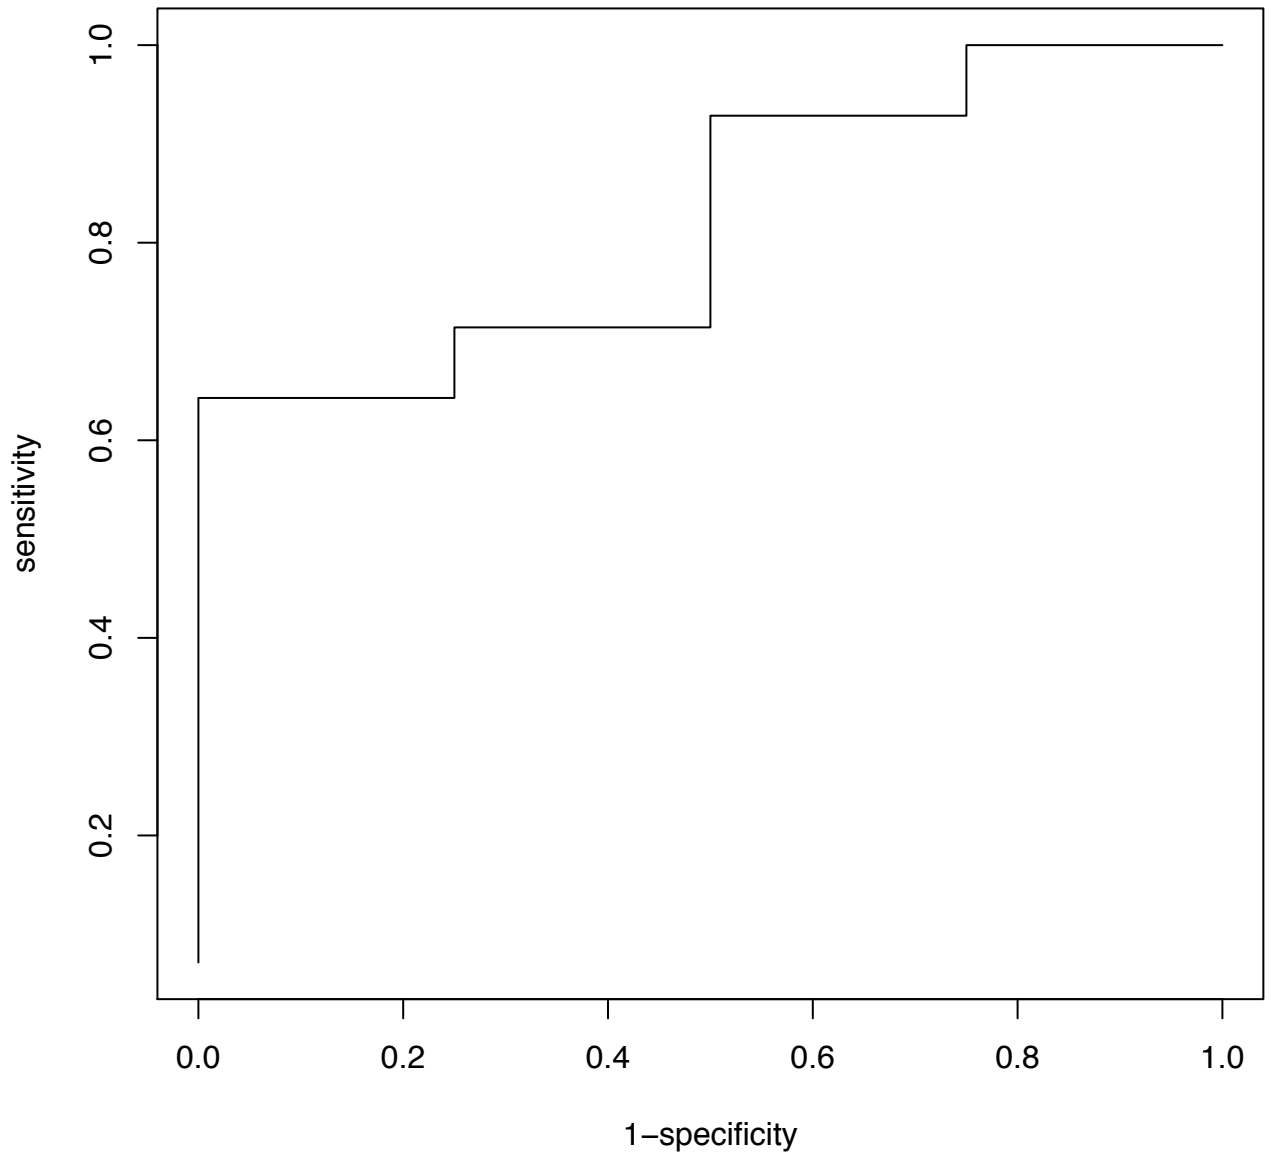

hu: Basal vs. LumB . Number of peptides: 30

ROC area = 0.75 p-value = 0.079

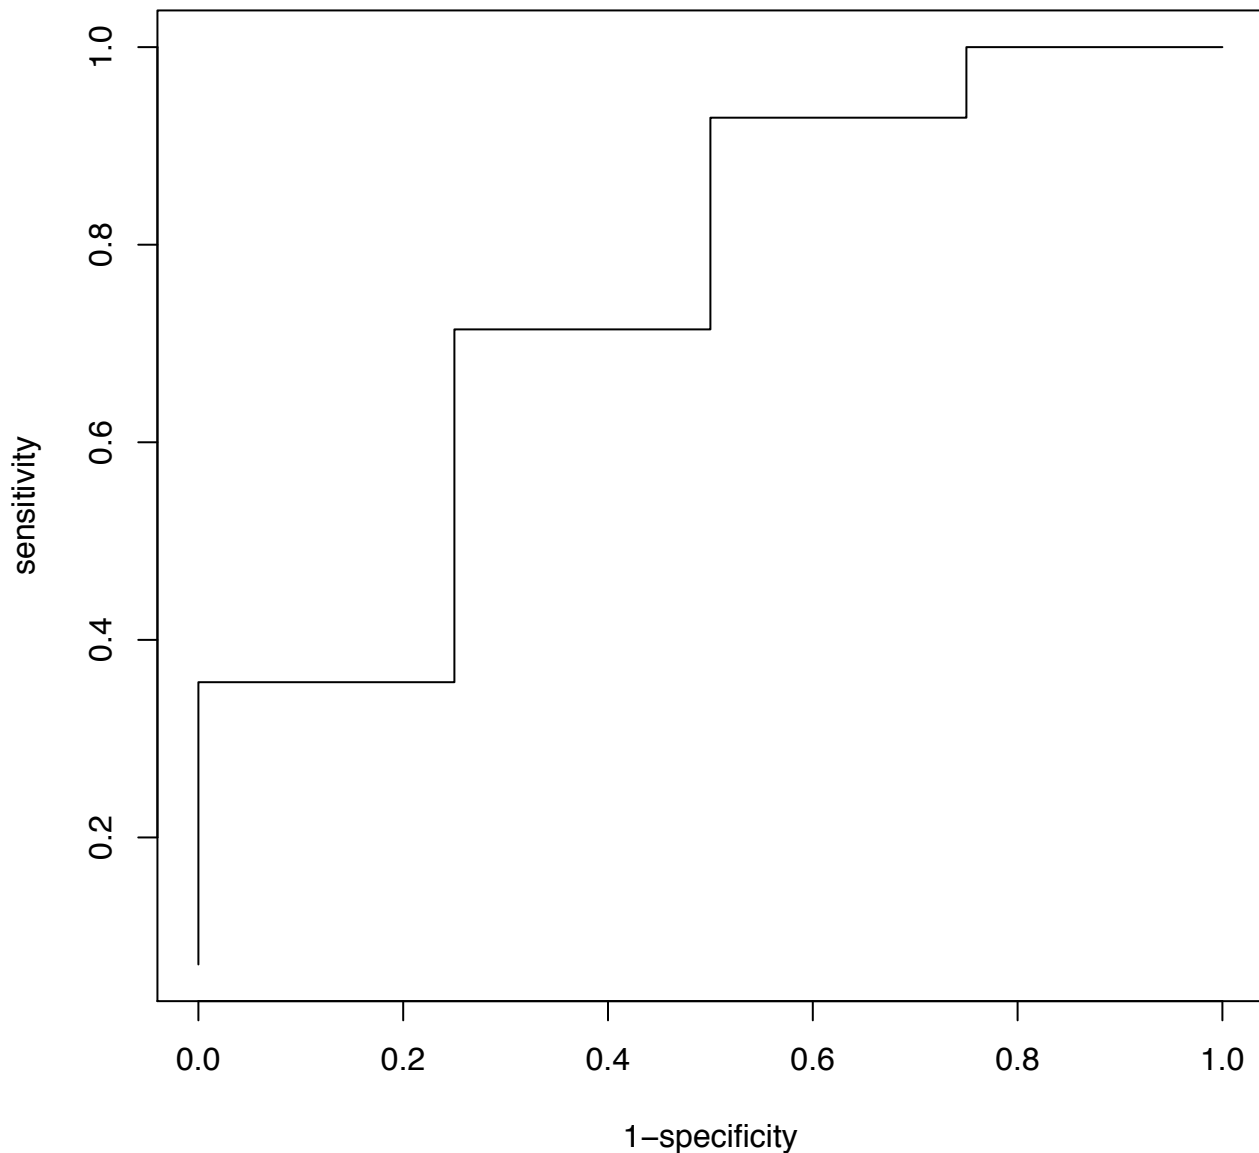

hu: Basal vs. LumB . Number of peptides: 40

ROC area = 0.75 p-value = 0.079

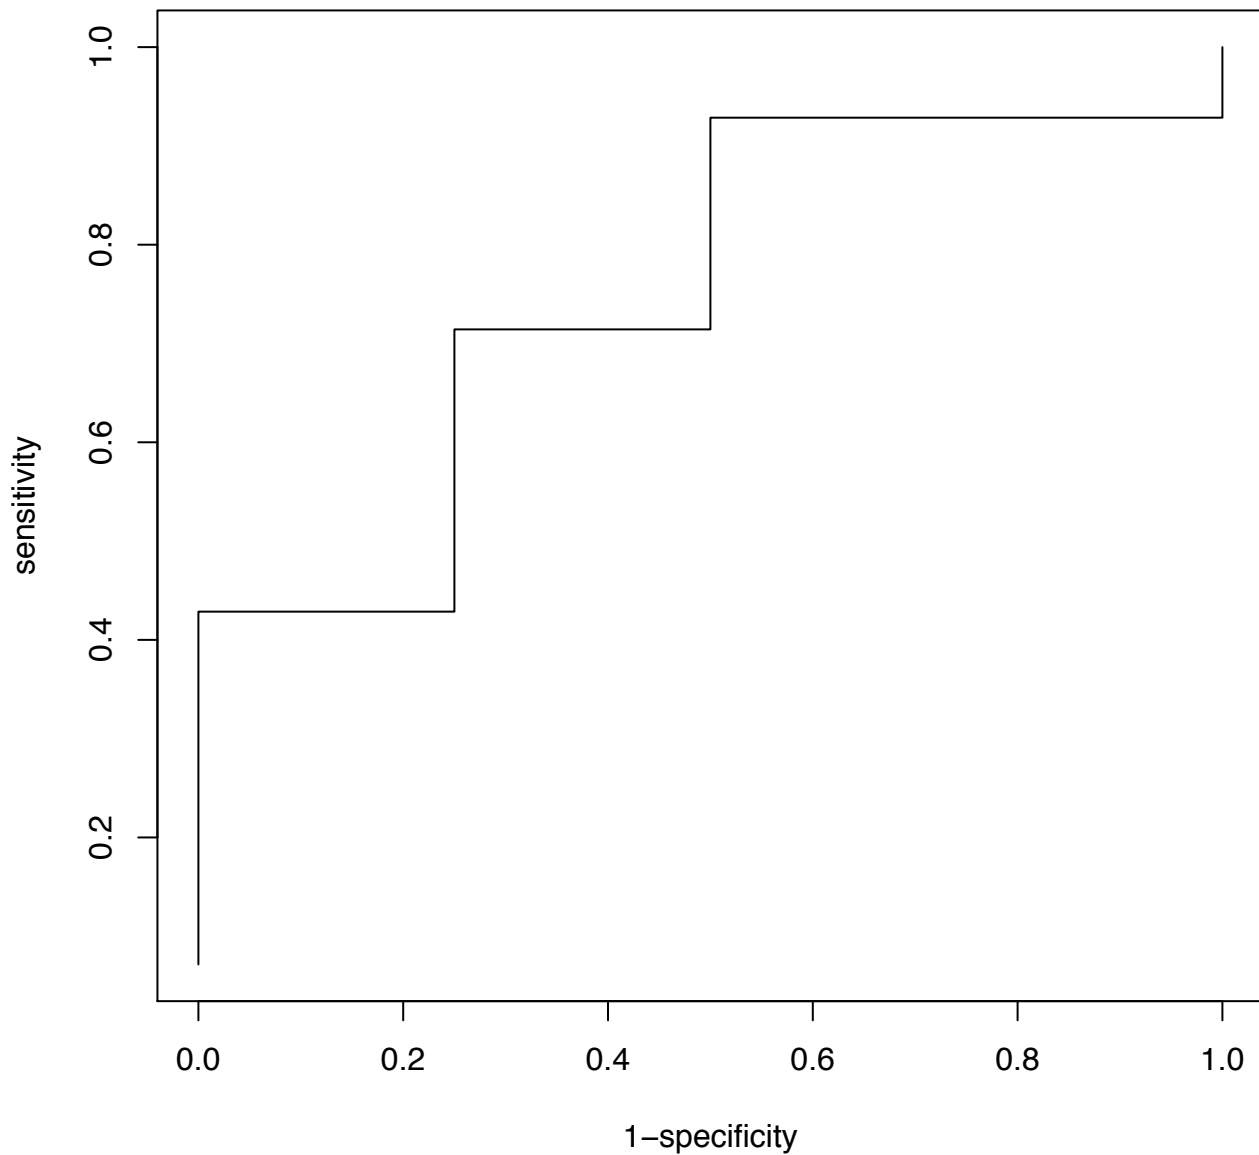

hu: Basal vs. LumB . Number of peptides: 100

ROC area = 0.86 p-value = 0.017

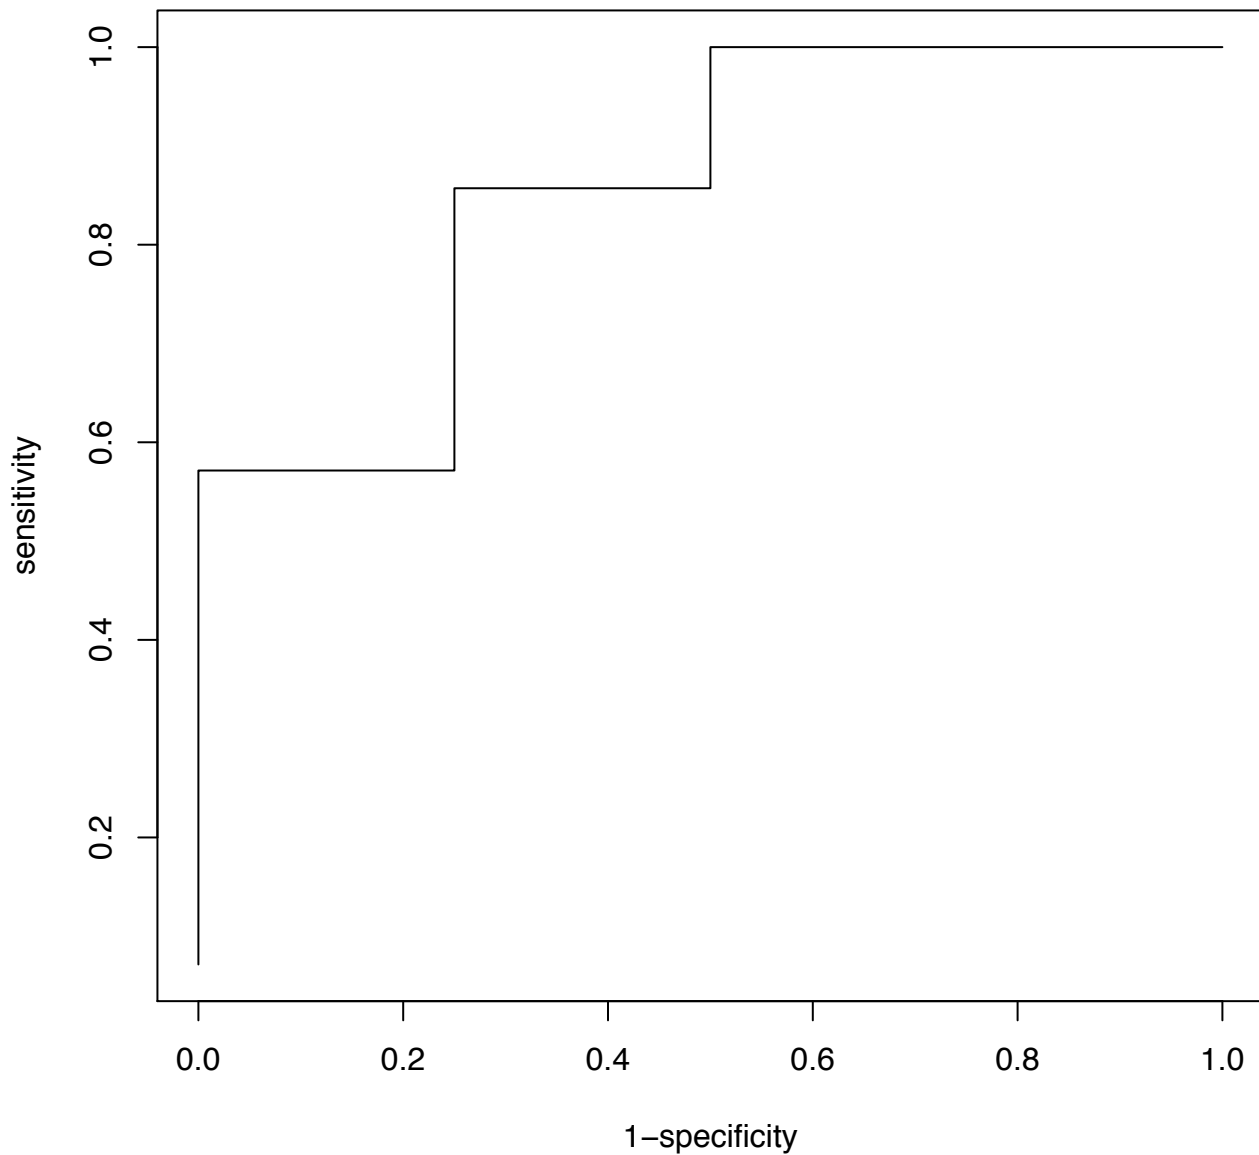

hu: Basal vs. LumB . Number of peptides: NA  
ROC area = 0.82 p-value = 0.031

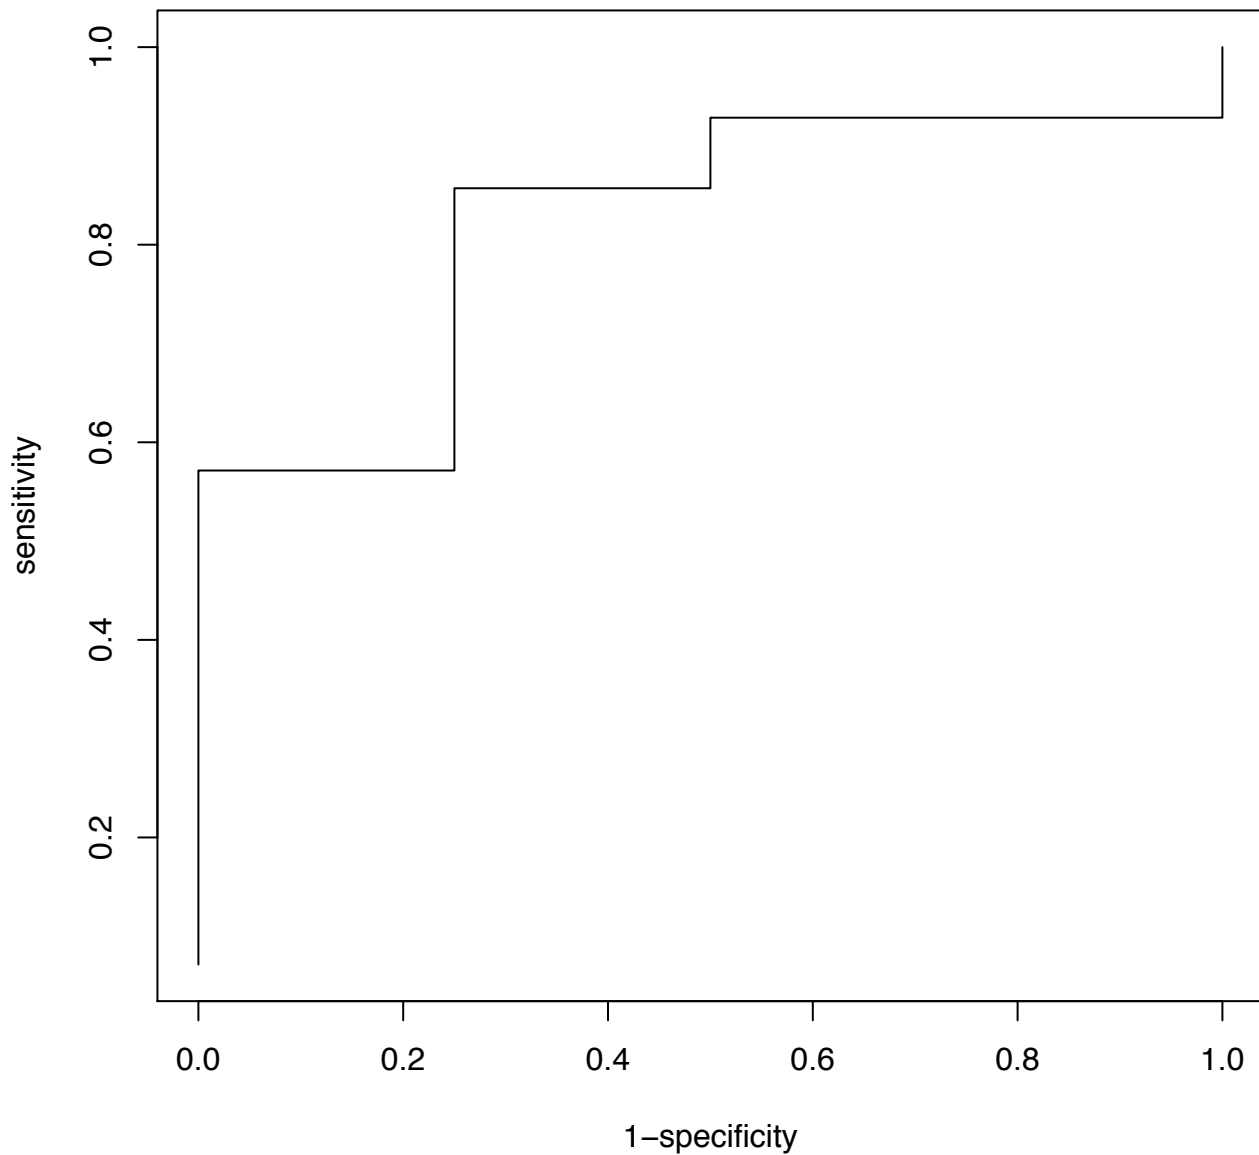

sorlie: Basal vs. Normal . Number of peptides: 20

ROC area = 0.66 p-value = 0.21

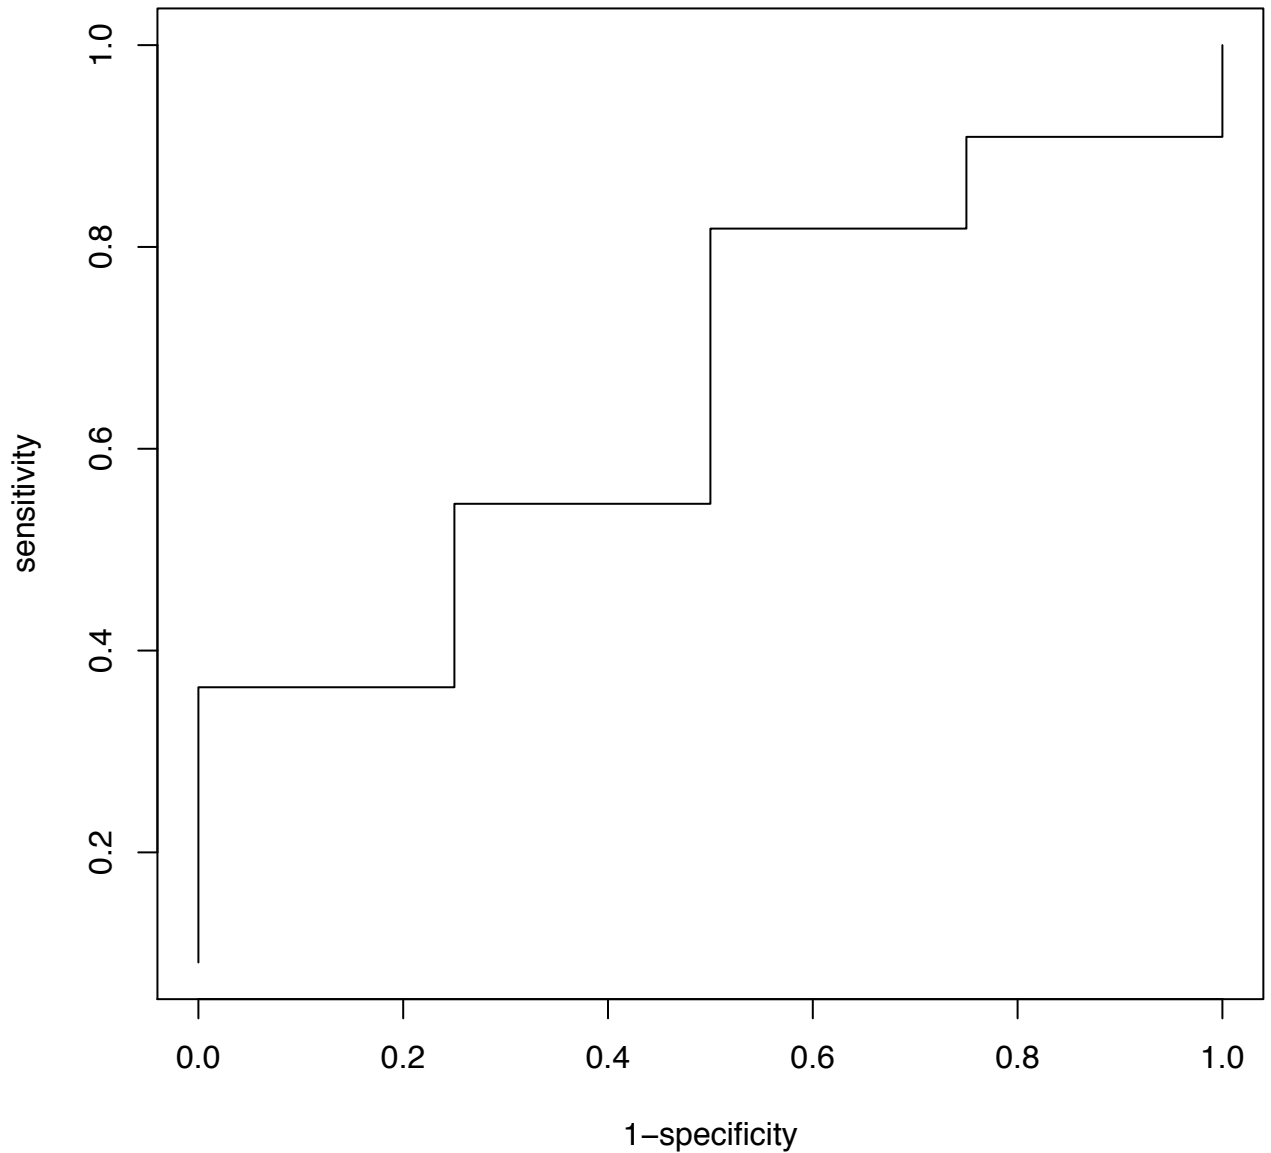

sortie: Basal vs. Normal . Number of peptides: 30

ROC area = 0.52 p-value = 0.47

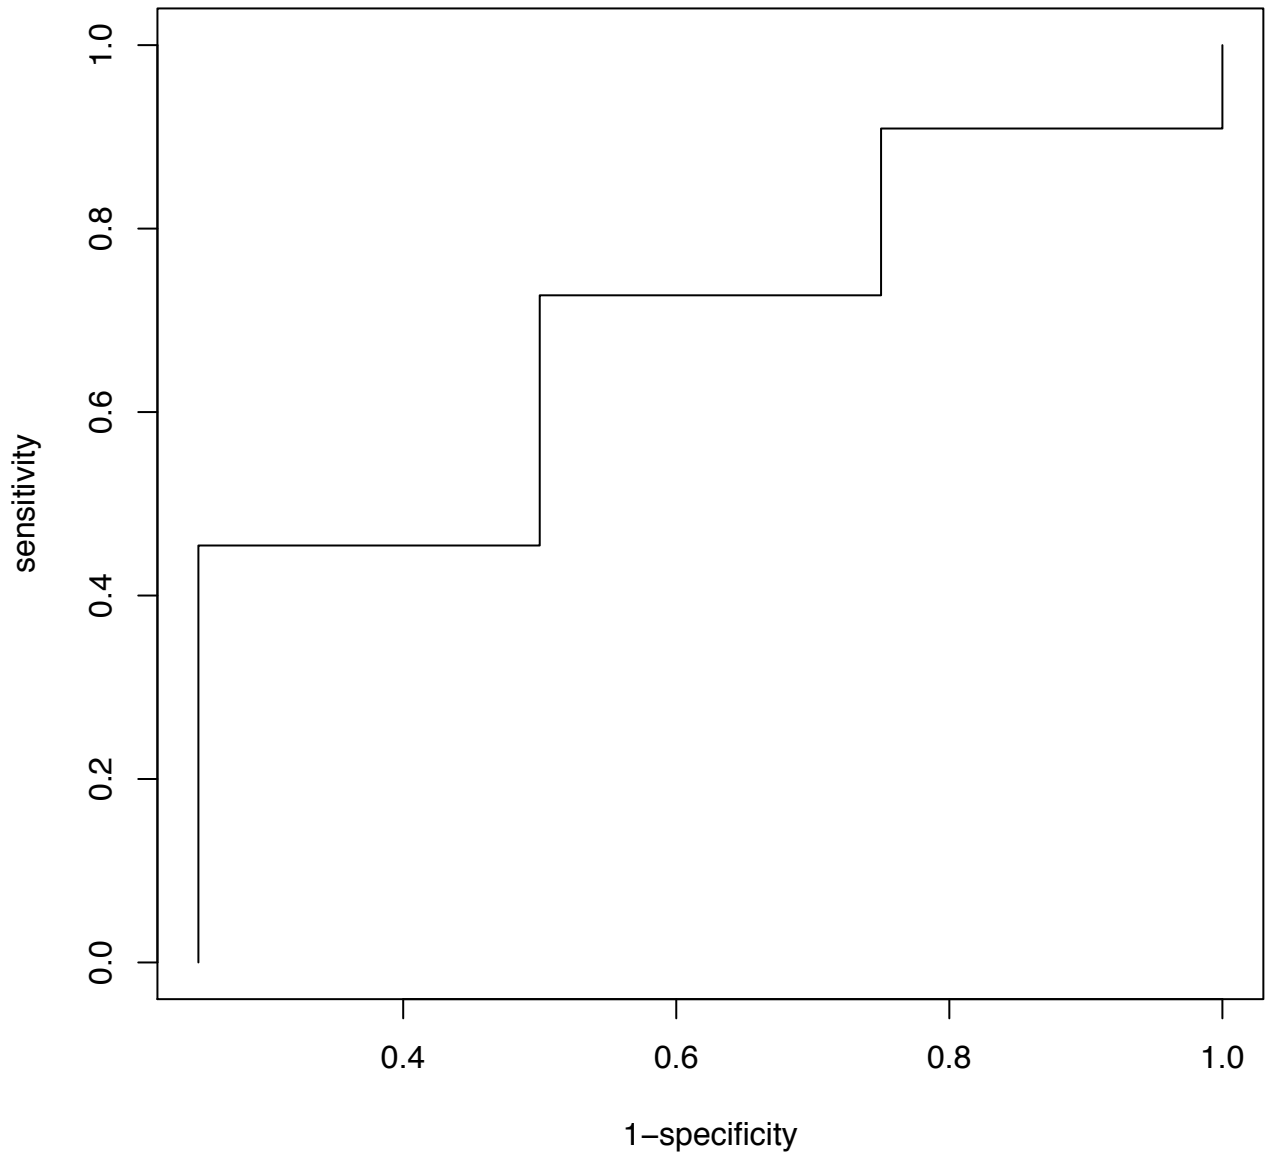

sorlie: Basal vs. Normal . Number of peptides: 40

ROC area = 0.64 p-value = 0.24

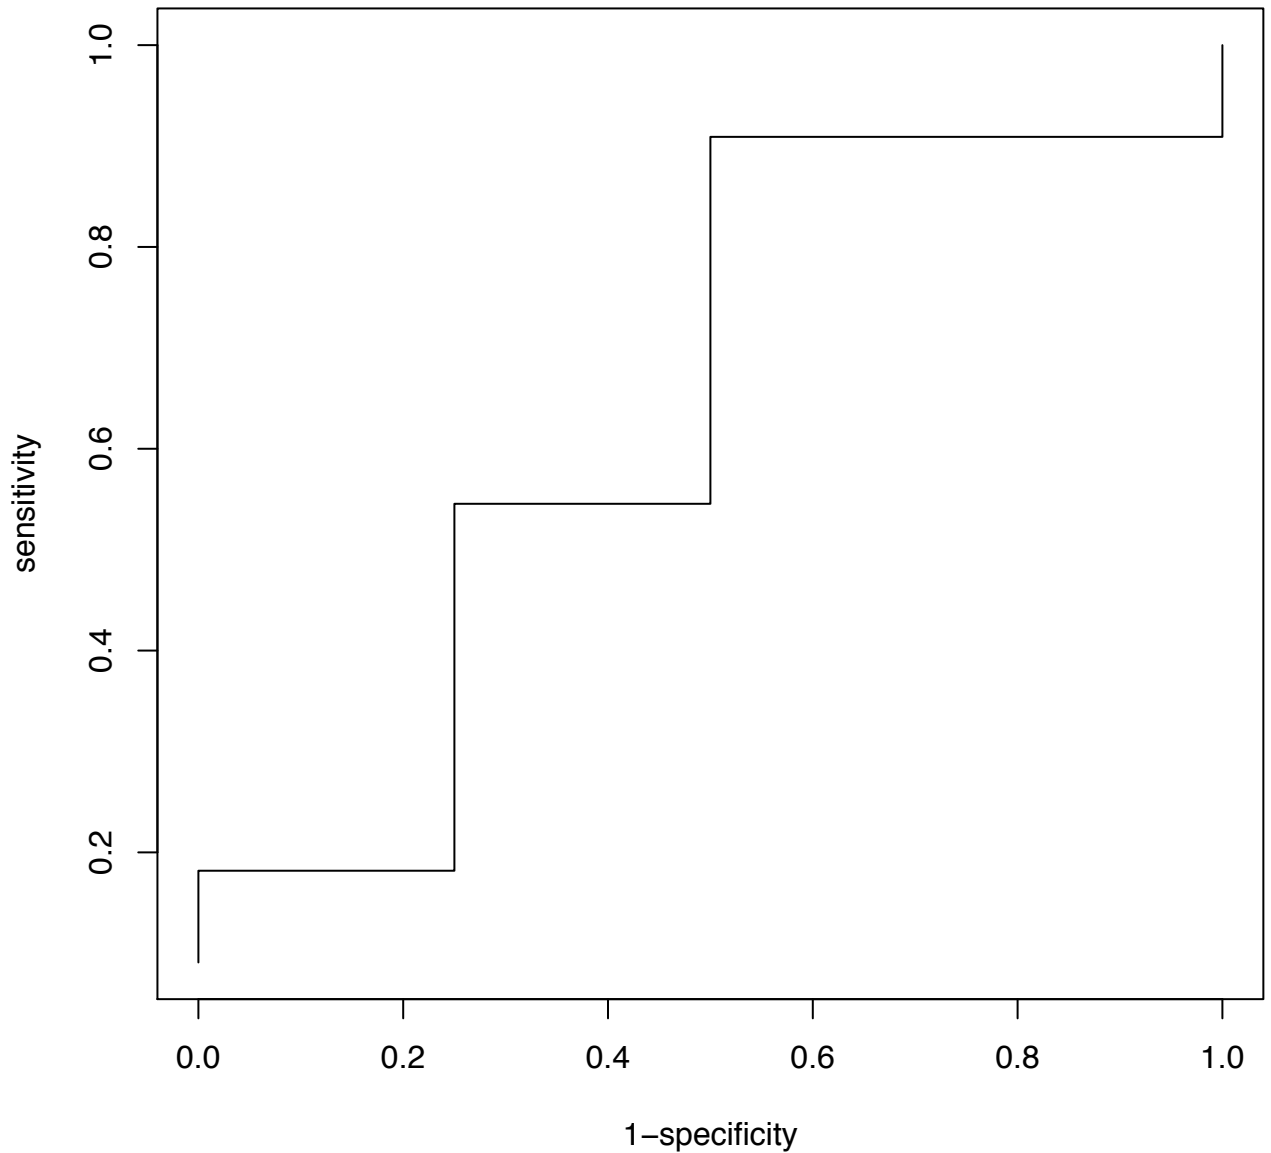



sorlie: Basal vs. Normal . Number of peptides: 100  
ROC area = 0.7 p-value = 0.14

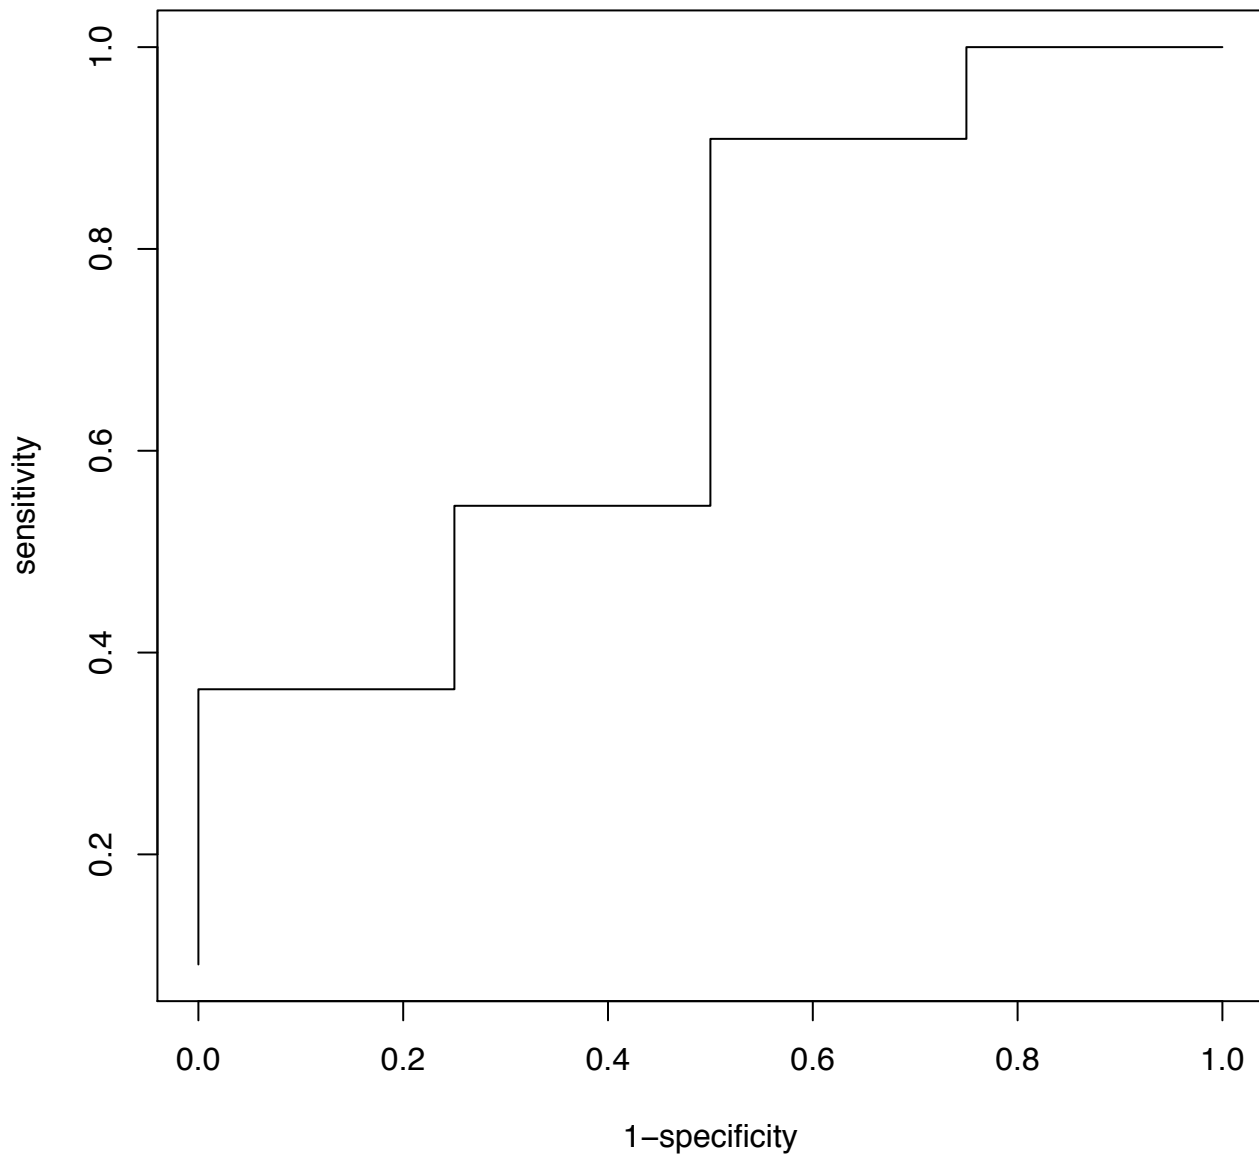

sorlie: Basal vs. Normal . Number of peptides: NA  
ROC area = 0.7 p-value = 0.14

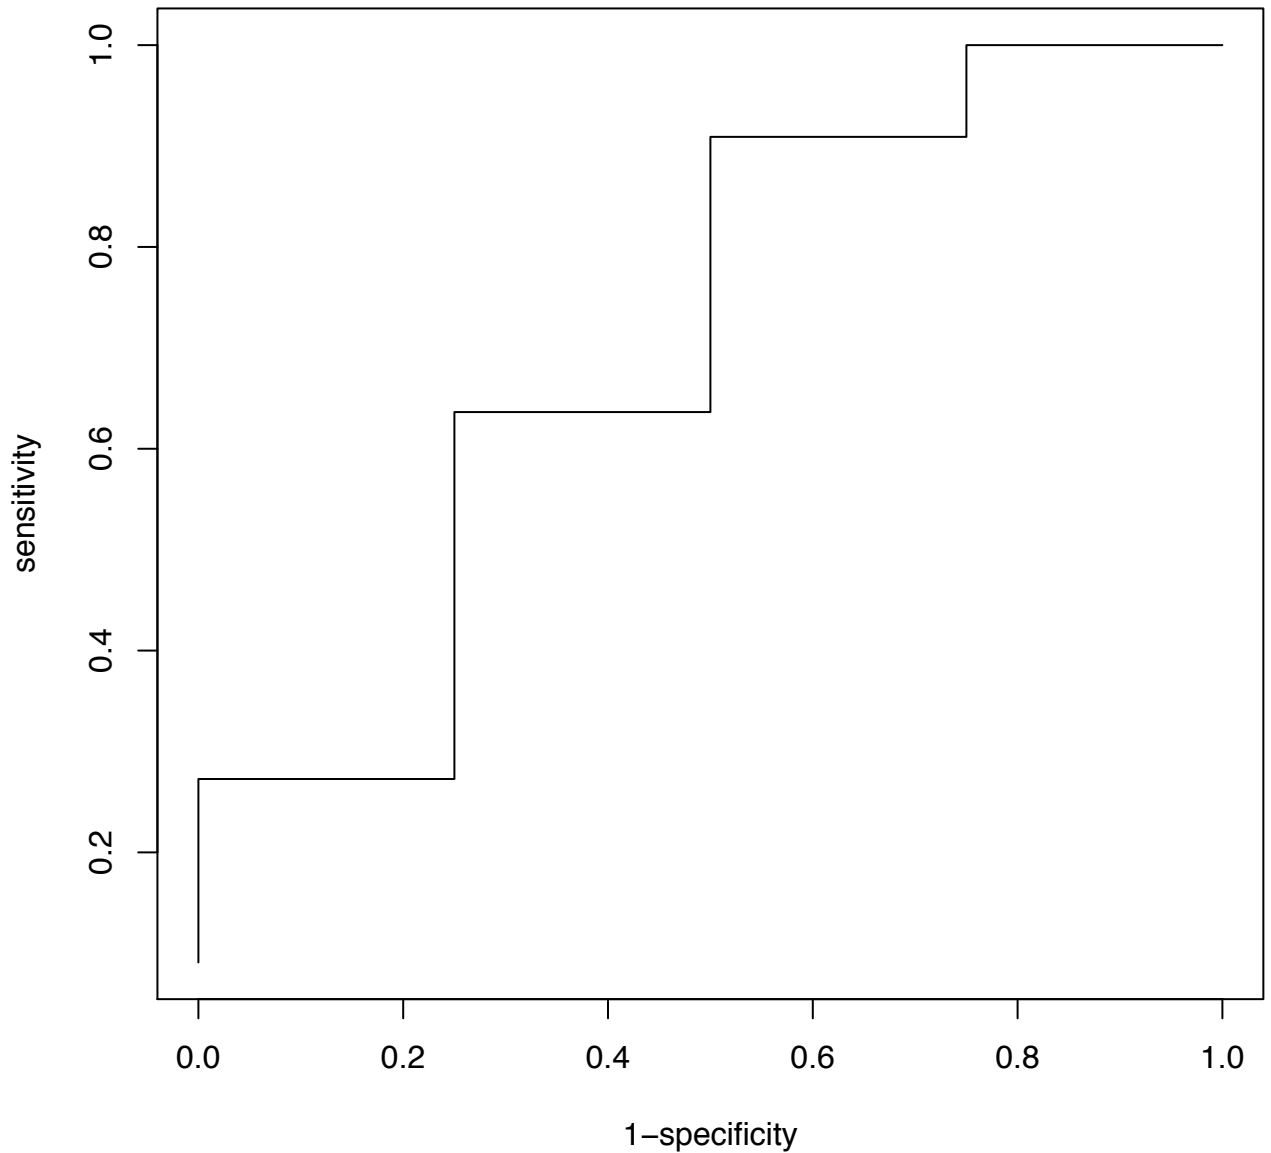

pam50: Basal vs. Normal . Number of peptides: 20  
ROC area = 0.73 p-value = 0.074

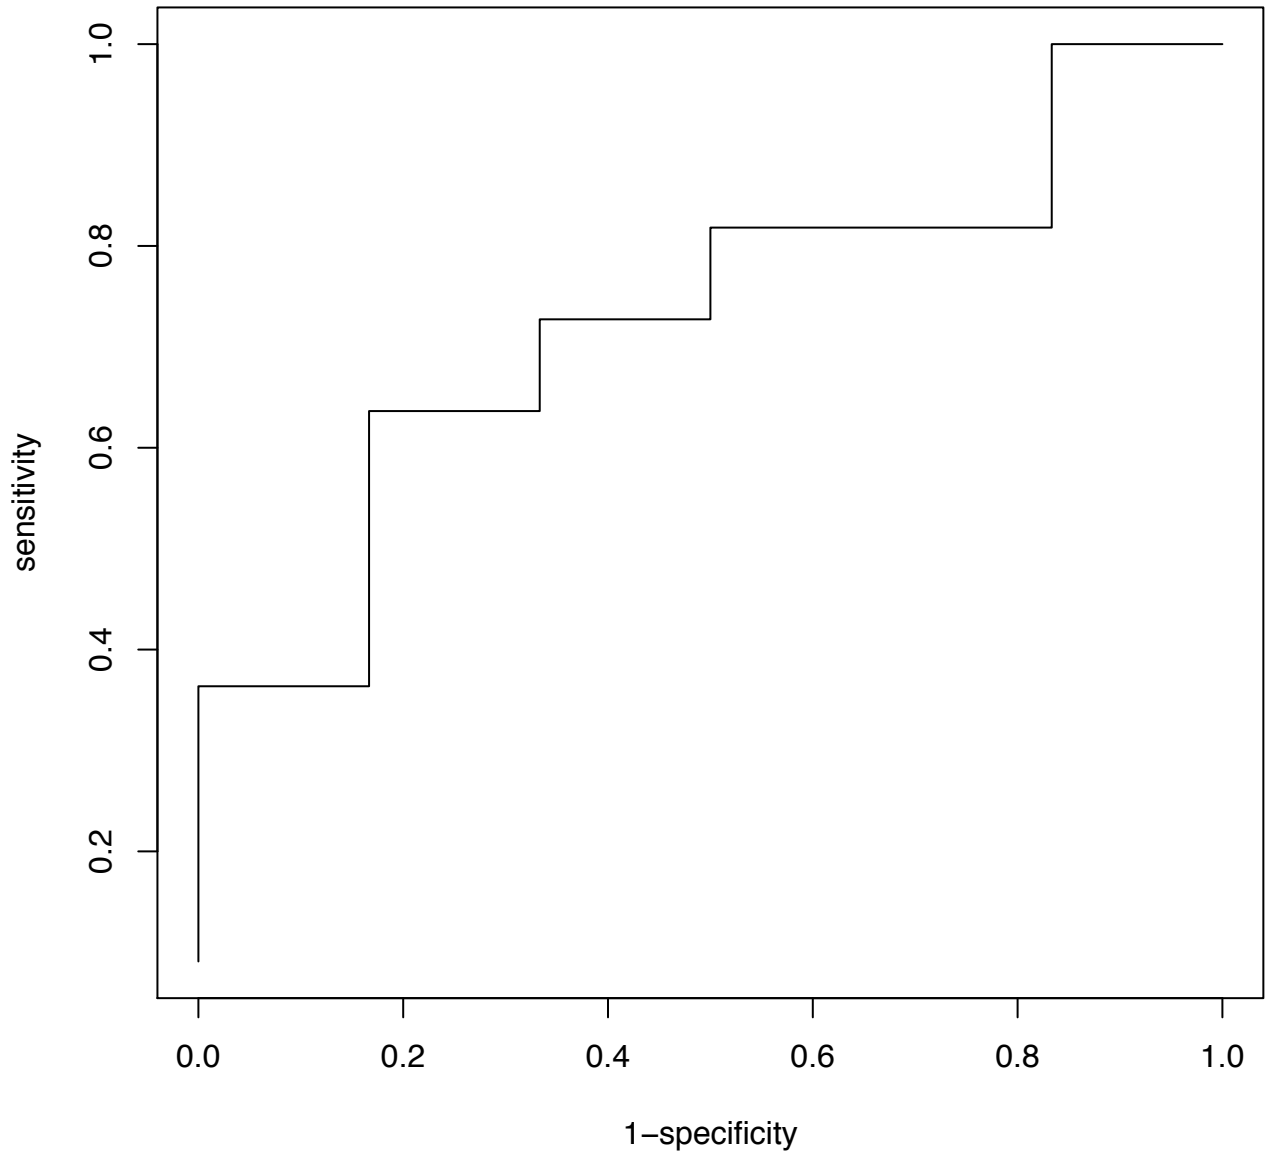

pam50: Basal vs. Normal . Number of peptides: 30  
ROC area = 0.77 p-value = 0.039

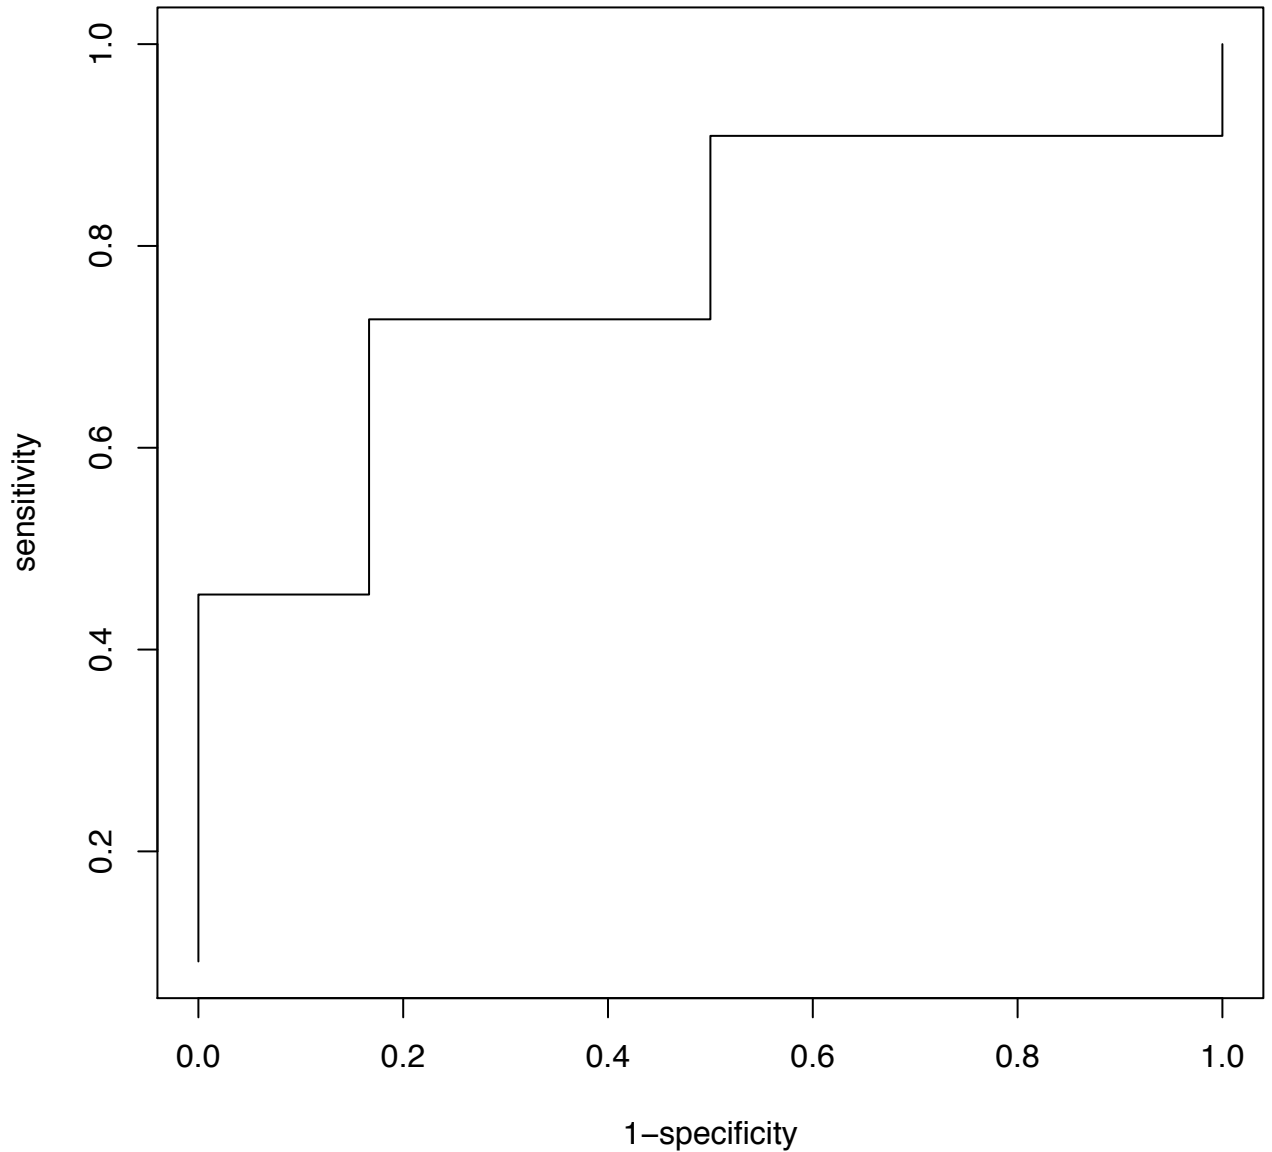

pam50: Basal vs. Normal . Number of peptides: 40  
ROC area = 0.83 p-value = 0.014

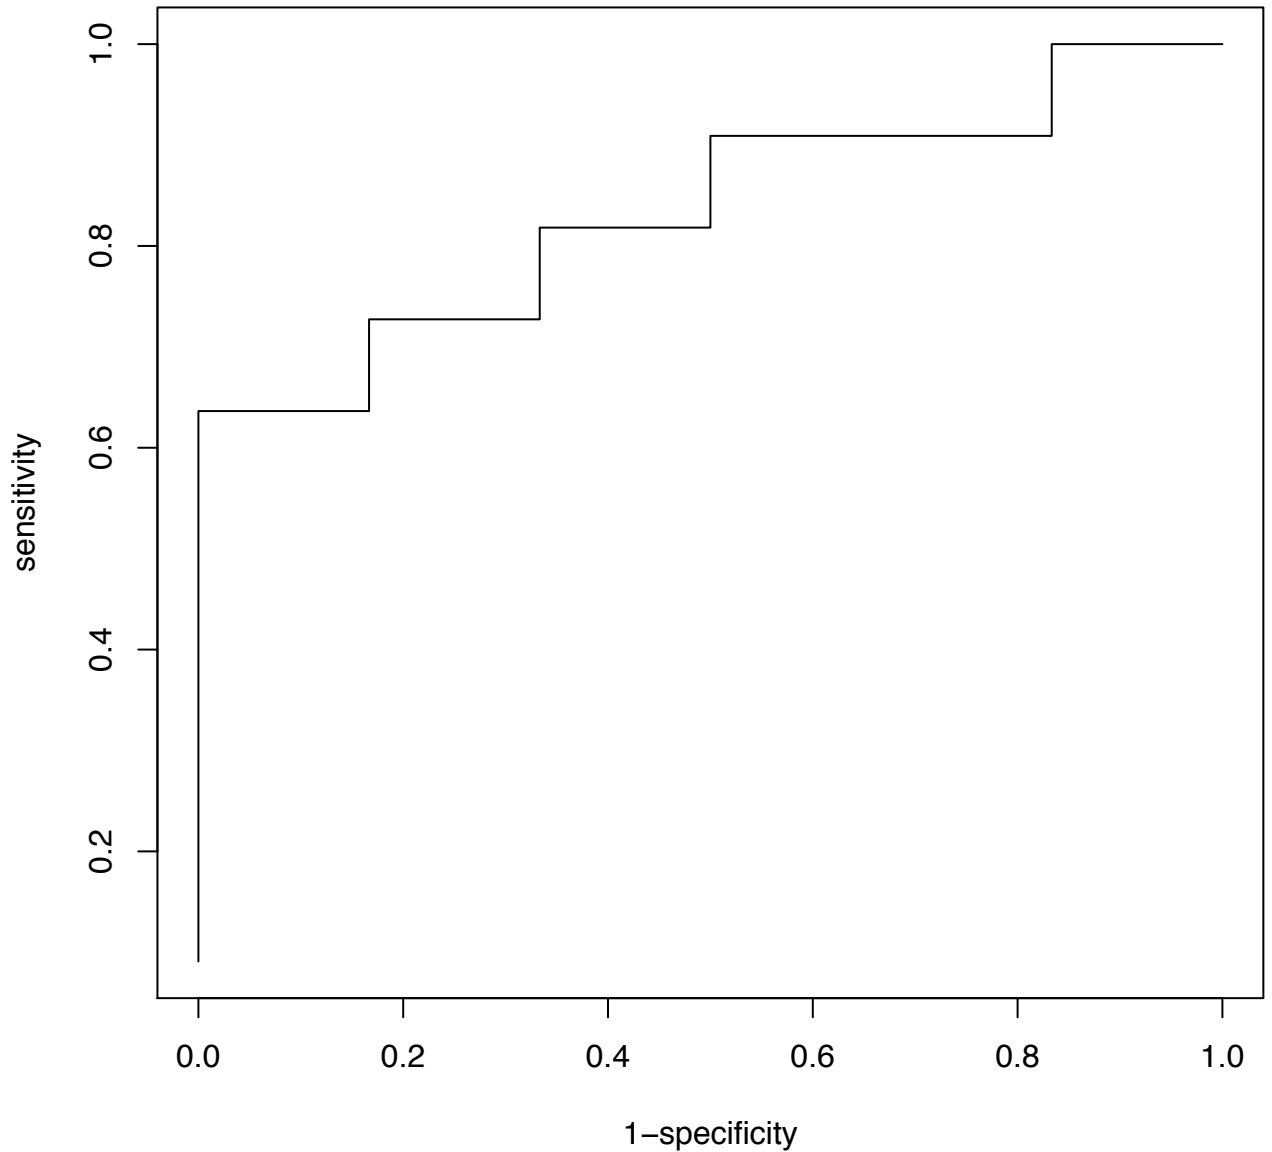

pam50: Basal vs. Normal . Number of peptides: 100

ROC area = 0.8 p-value = 0.024

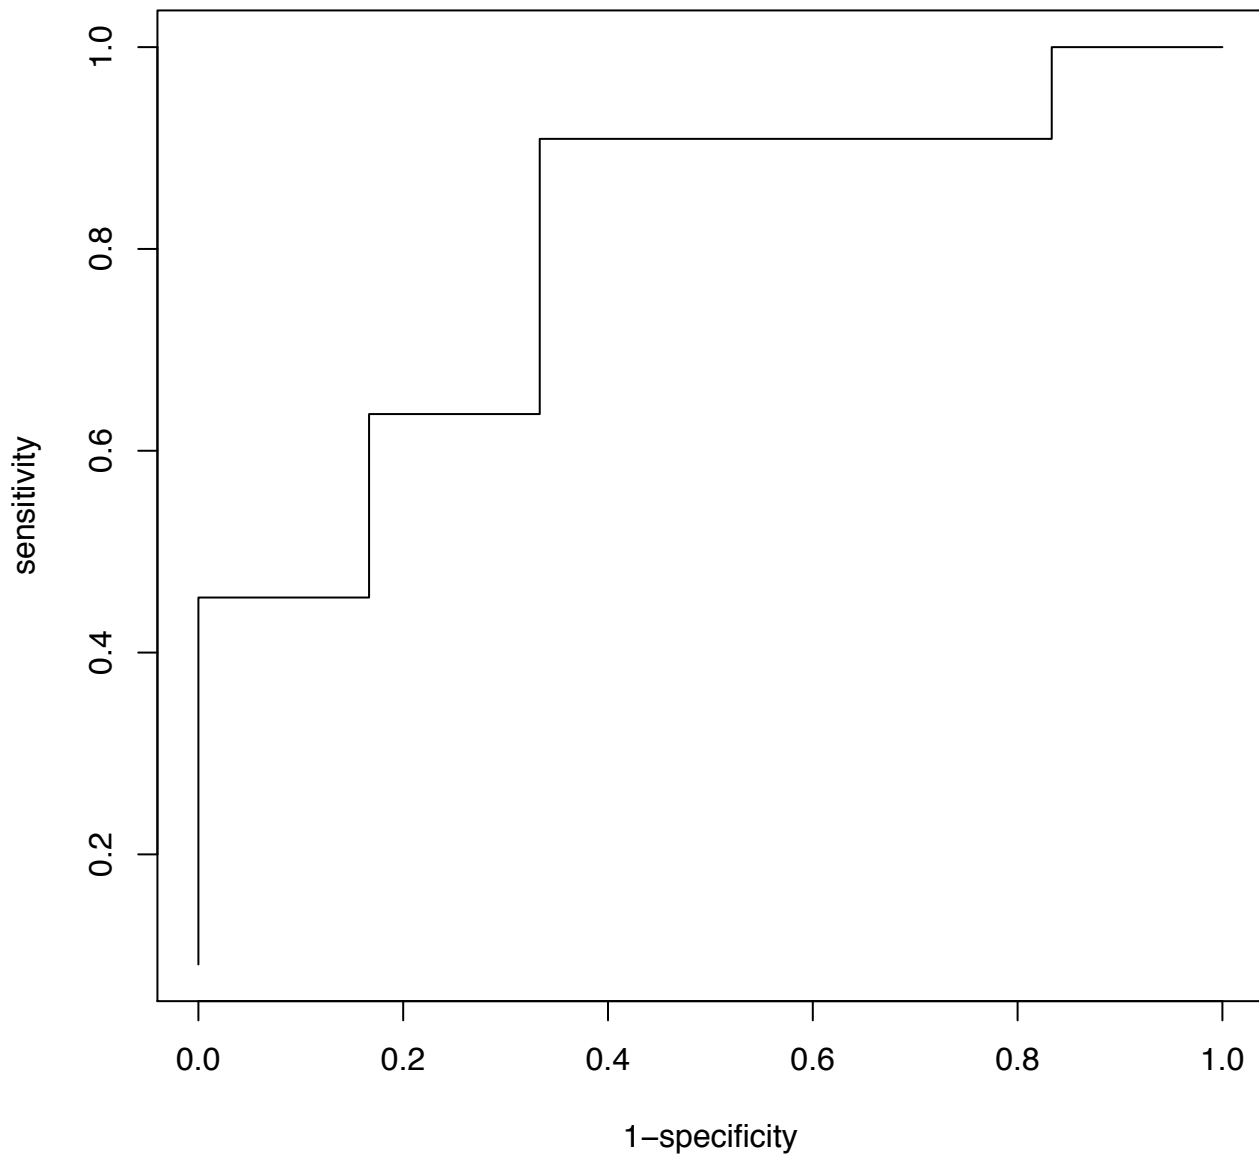

pam50: Basal vs. Normal . Number of peptides: NA  
ROC area = 0.76 p-value = 0.049

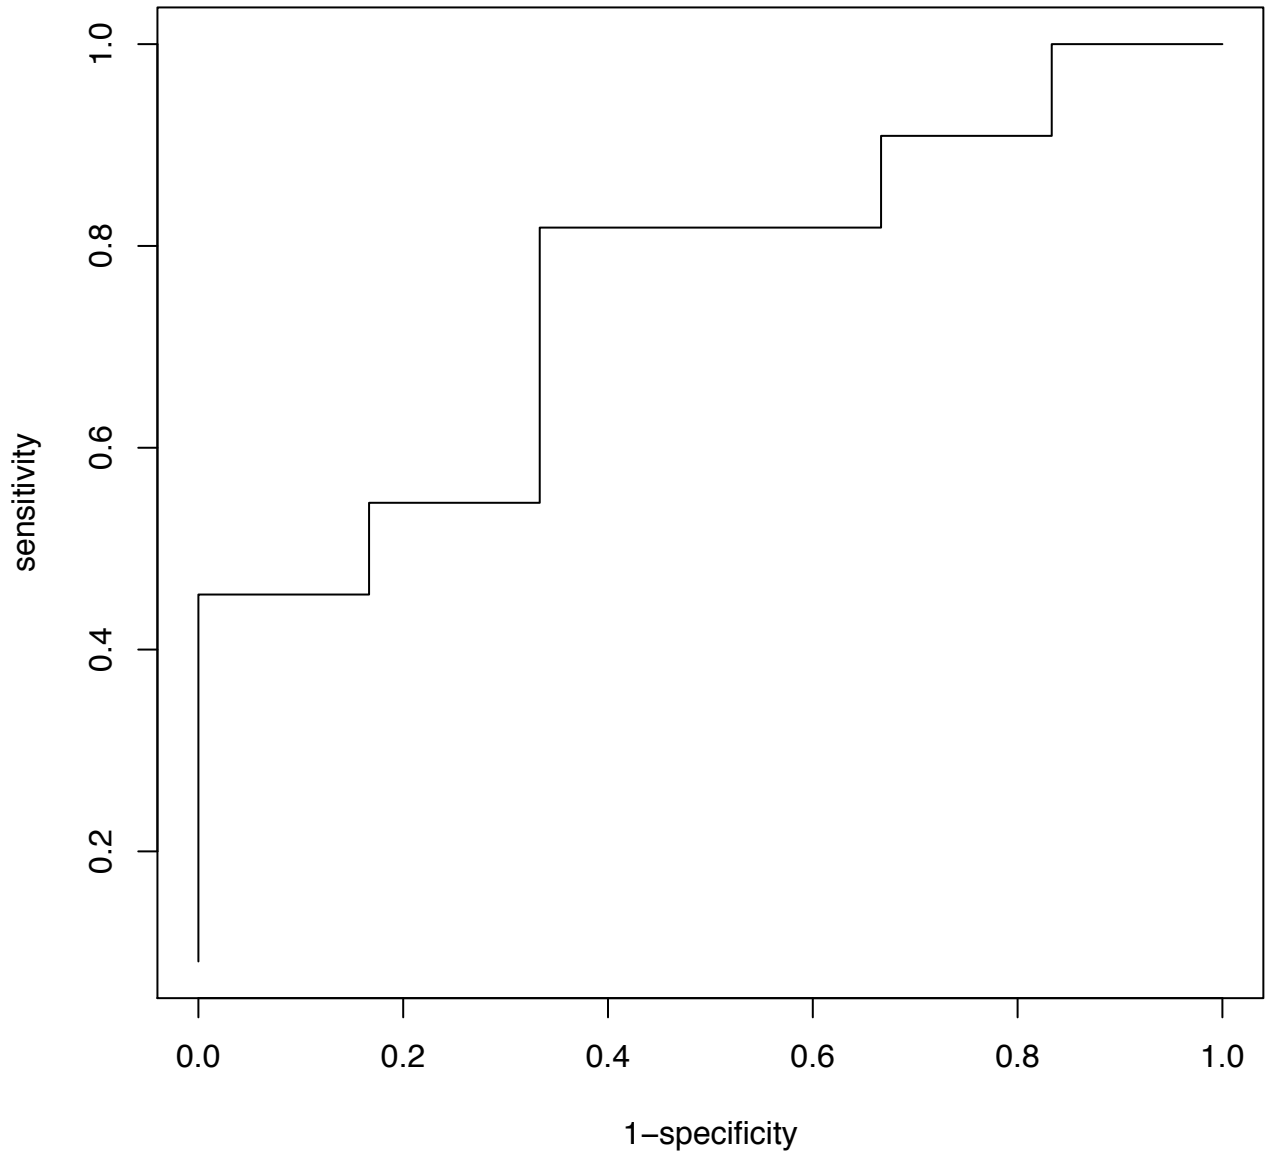

hu: Basal vs. Normal . Number of peptides: 20

ROC area = 0.71 p-value = 0.12

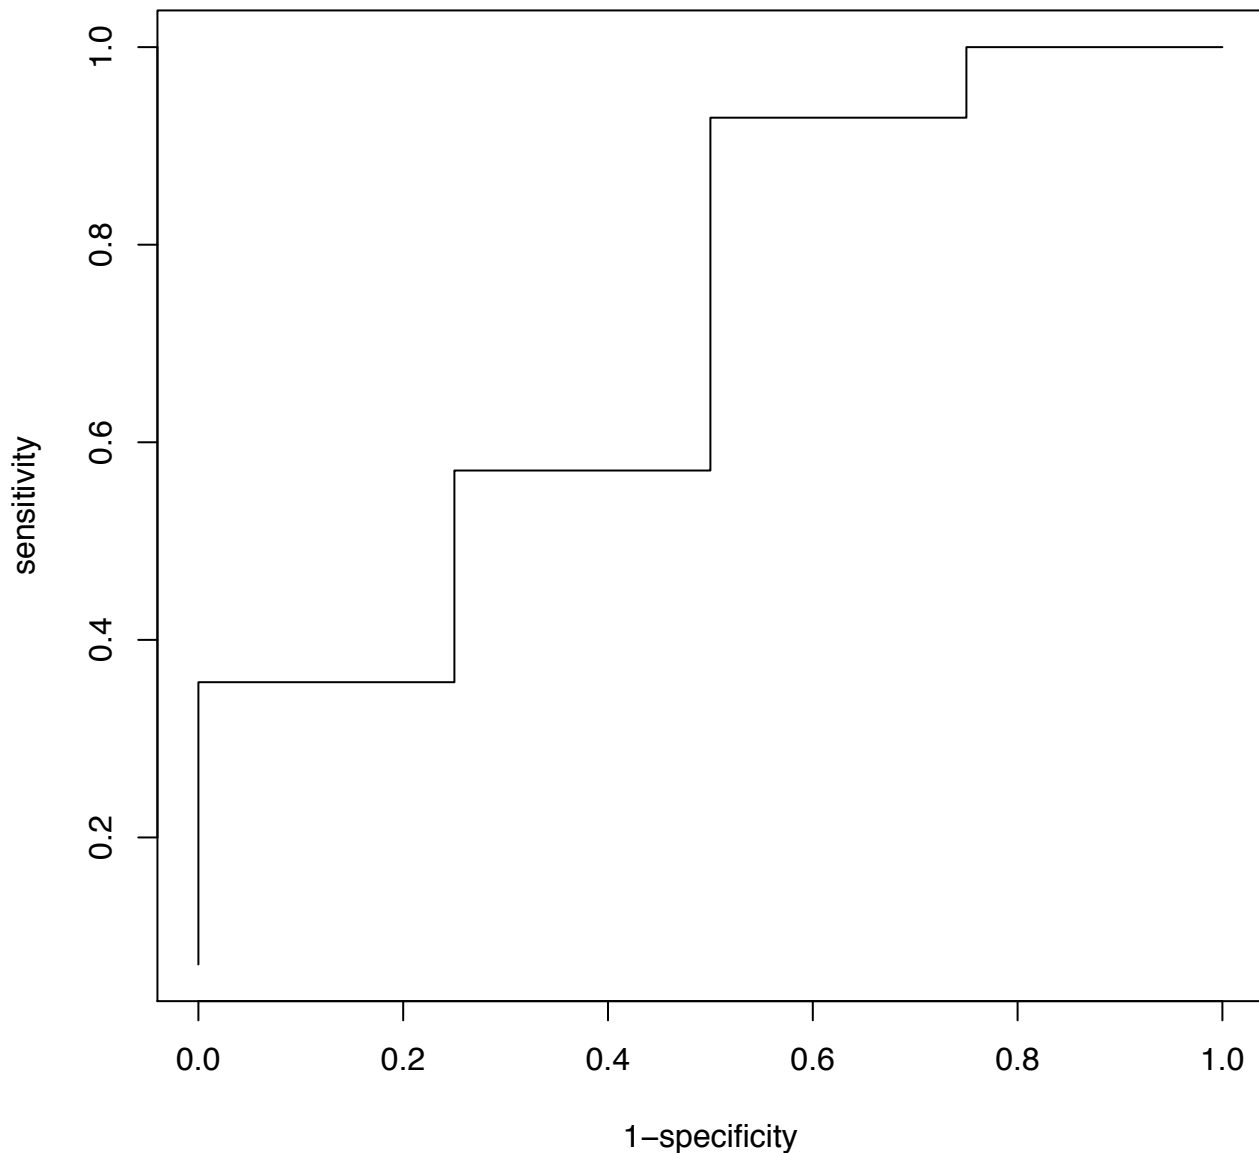



hu: Basal vs. Normal . Number of peptides: 30

ROC area = 0.64 p-value = 0.22

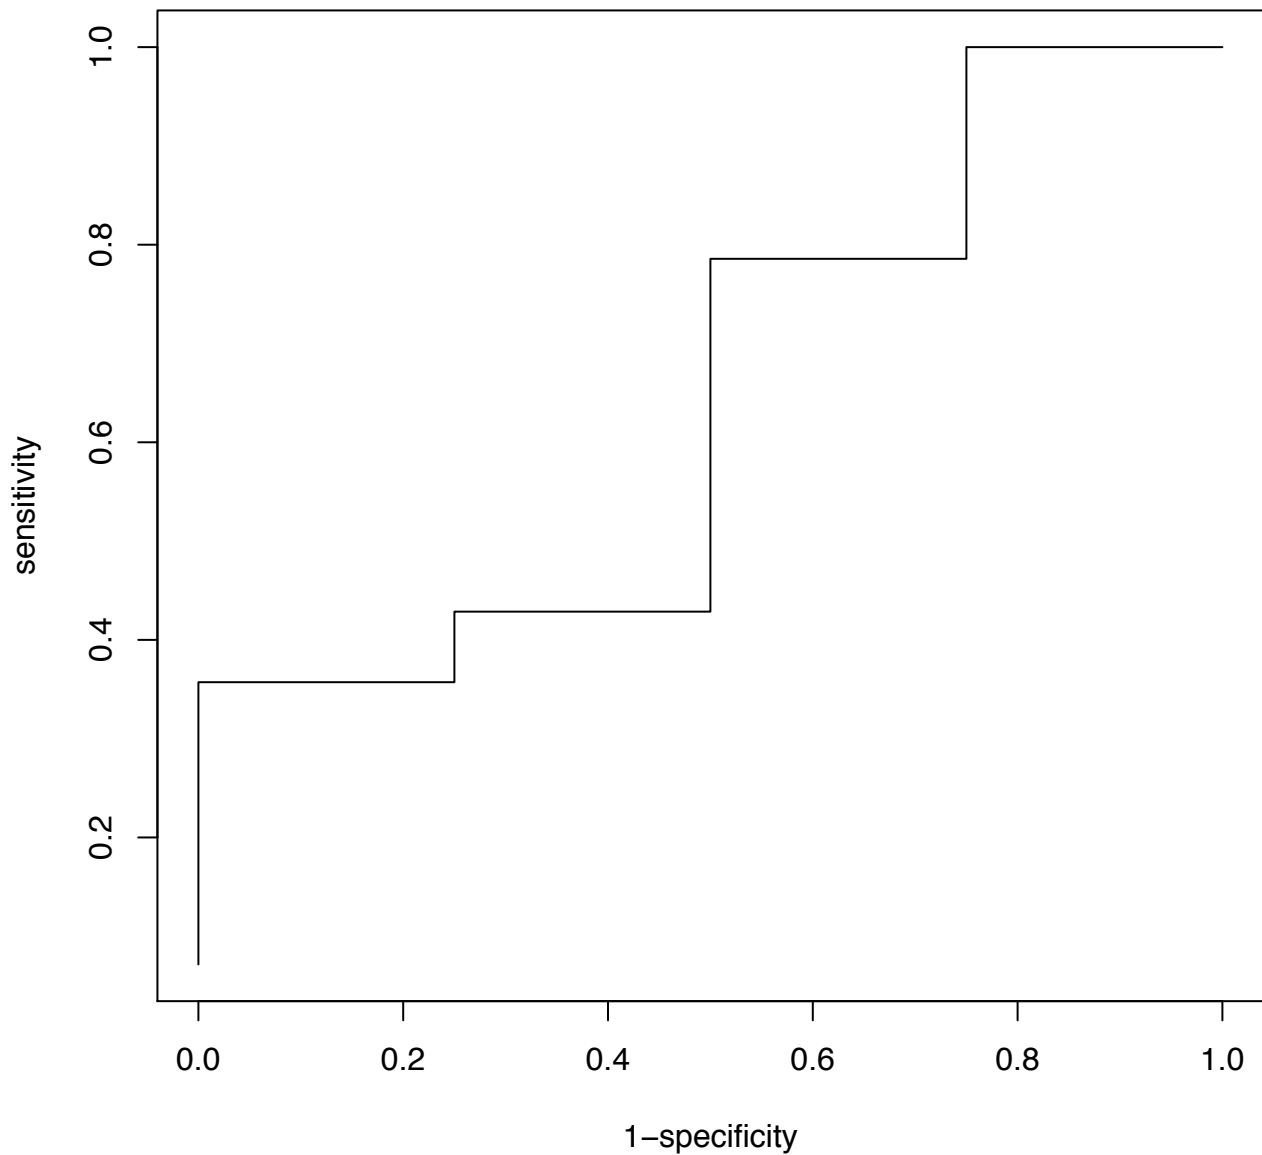

hu: Basal vs. Normal . Number of peptides: 40

ROC area = 0.7 p-value = 0.14

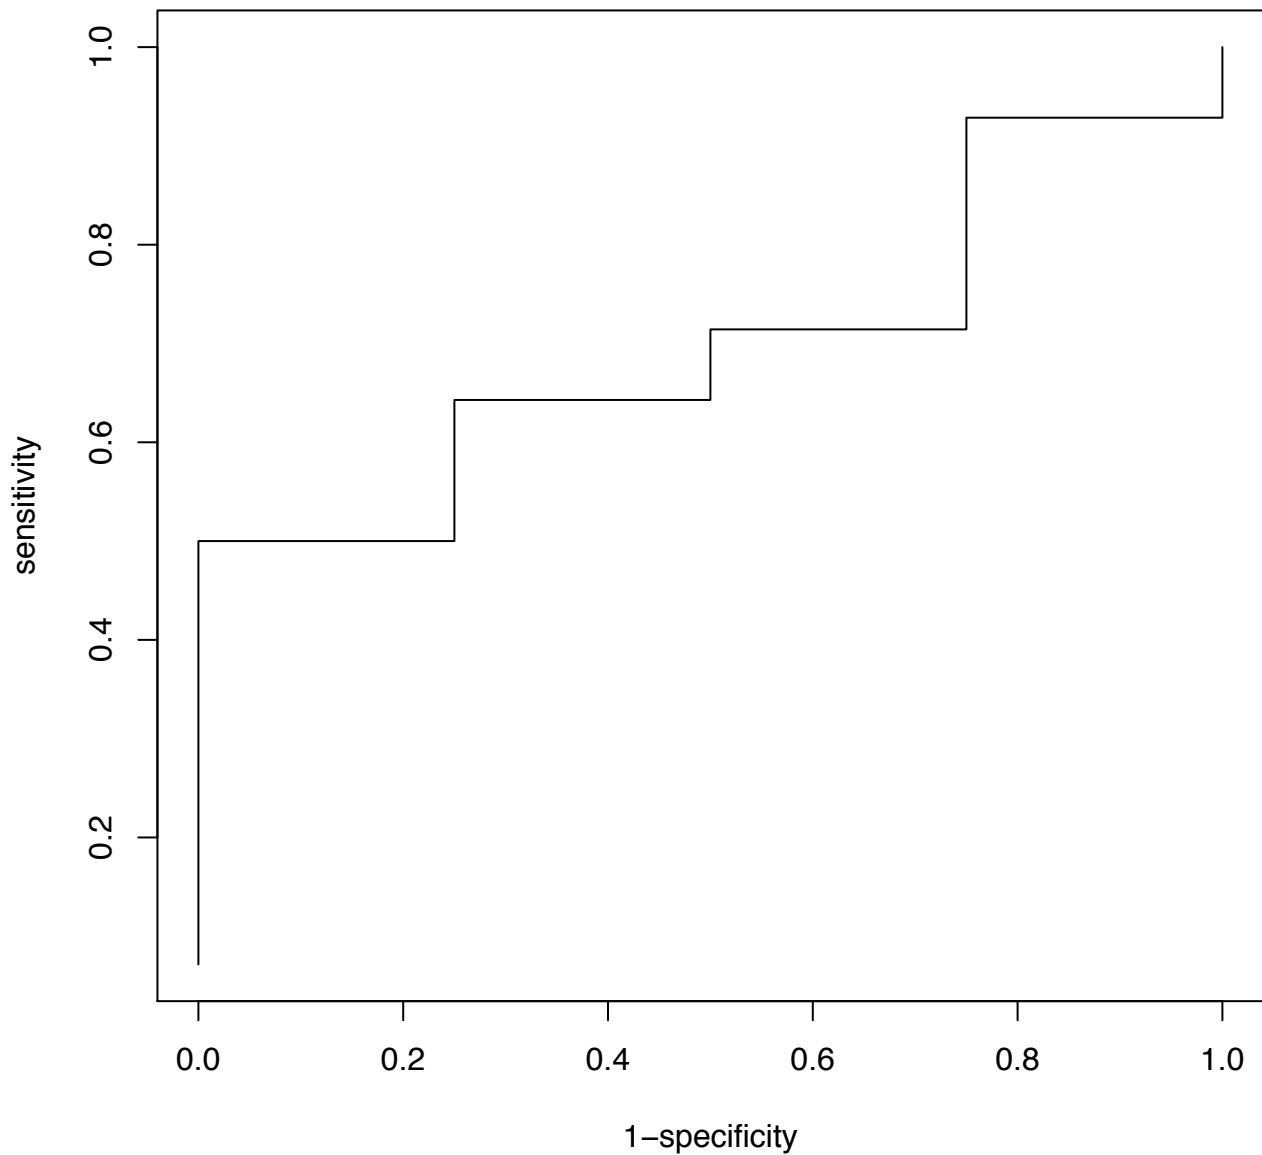

hu: Basal vs. Normal . Number of peptides: 100

ROC area = 0.75 p-value = 0.079

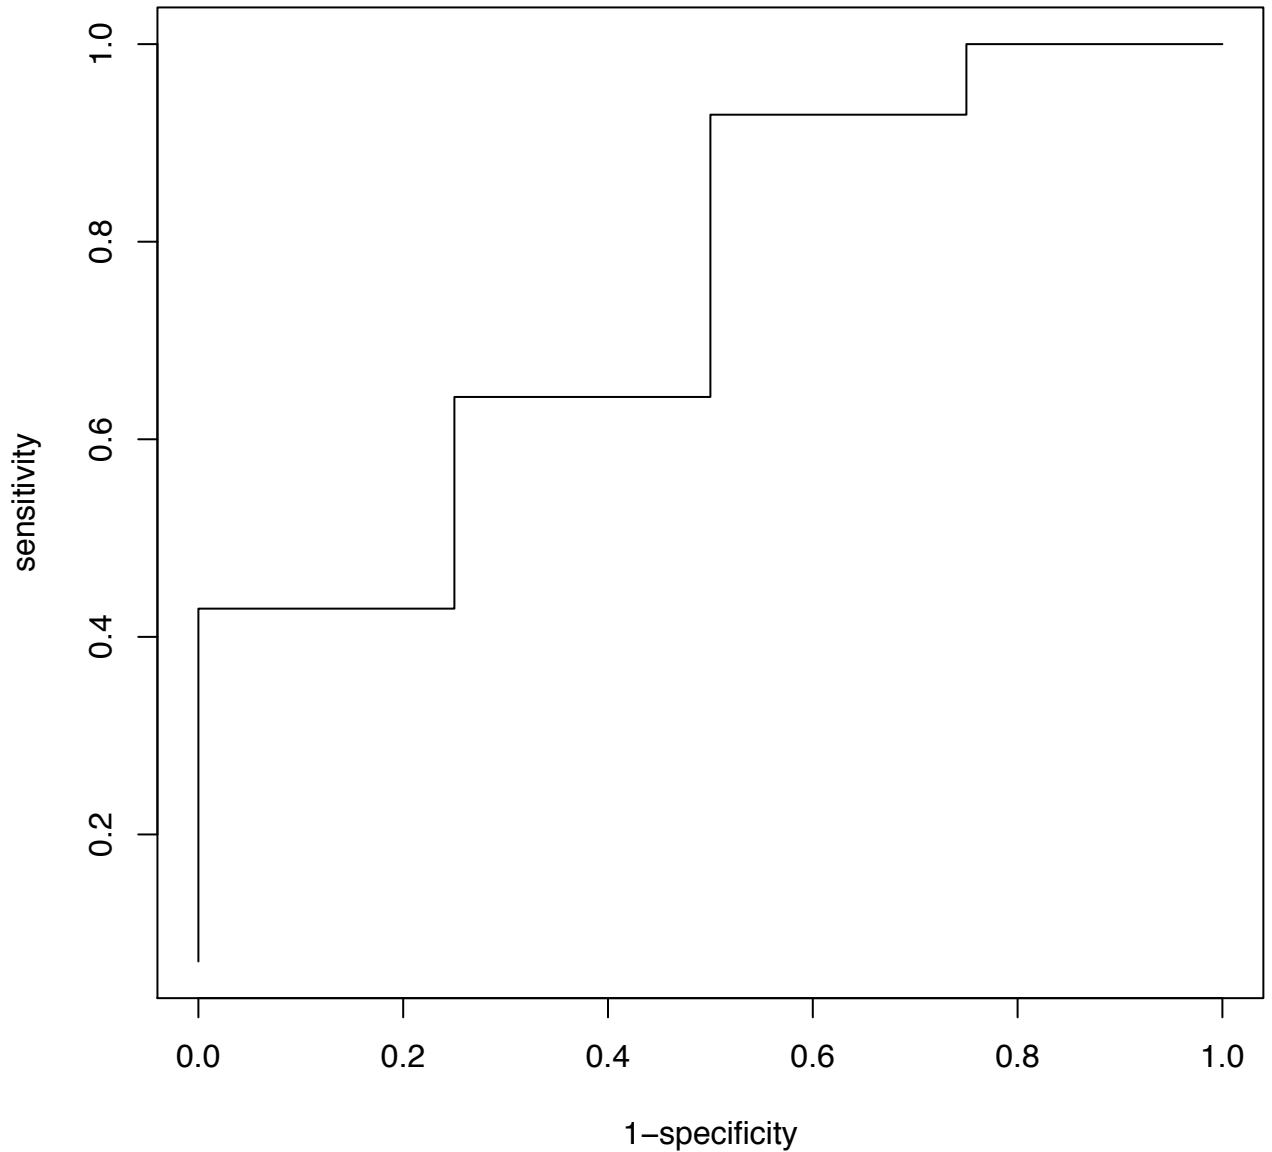

hu: Basal vs. Normal . Number of peptides: NA

ROC area = 0.64 p-value = 0.22

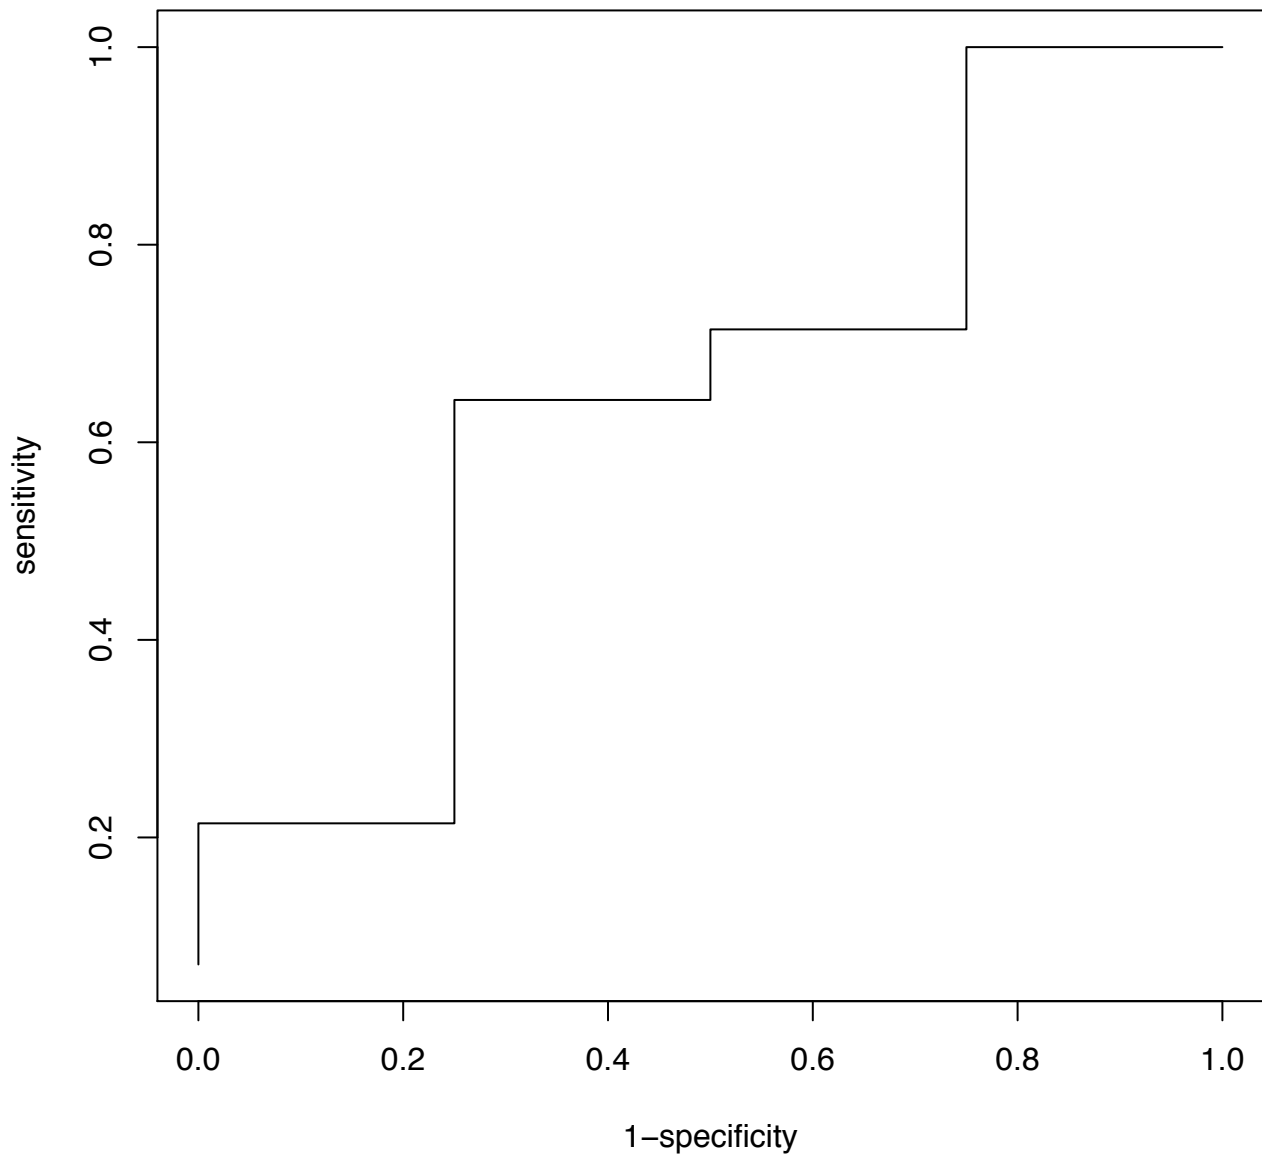

sortie: Her2 vs. LumA . Number of peptides: 20

ROC area = 0.75 p-value = 0.043

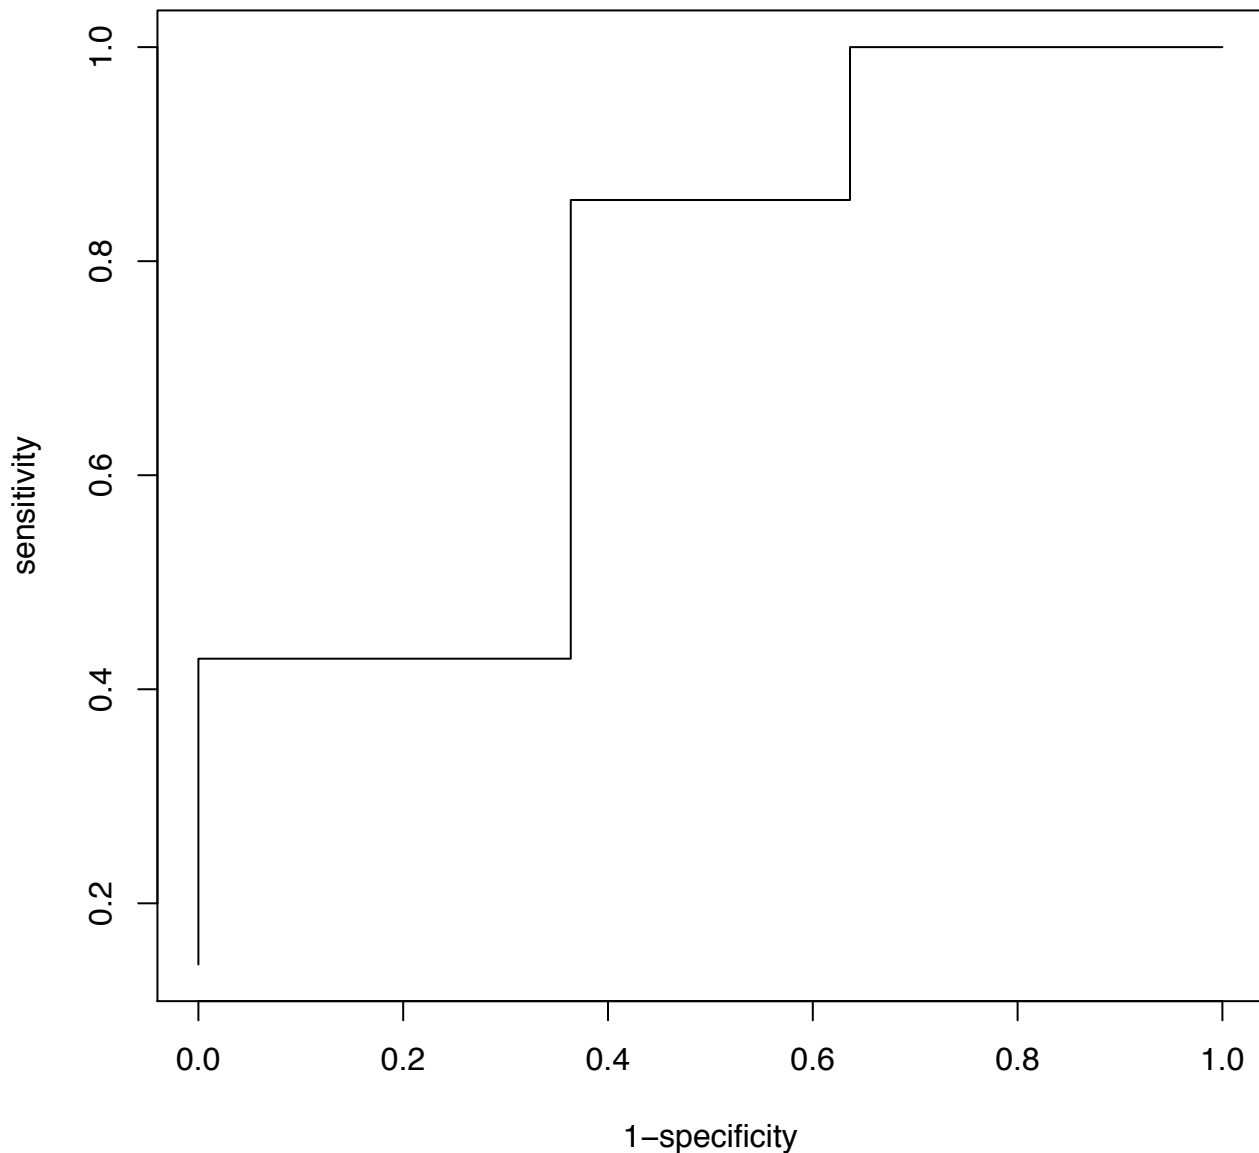

sortie: Her2 vs. LumA . Number of peptides: 30

ROC area = 0.69 p-value = 0.11

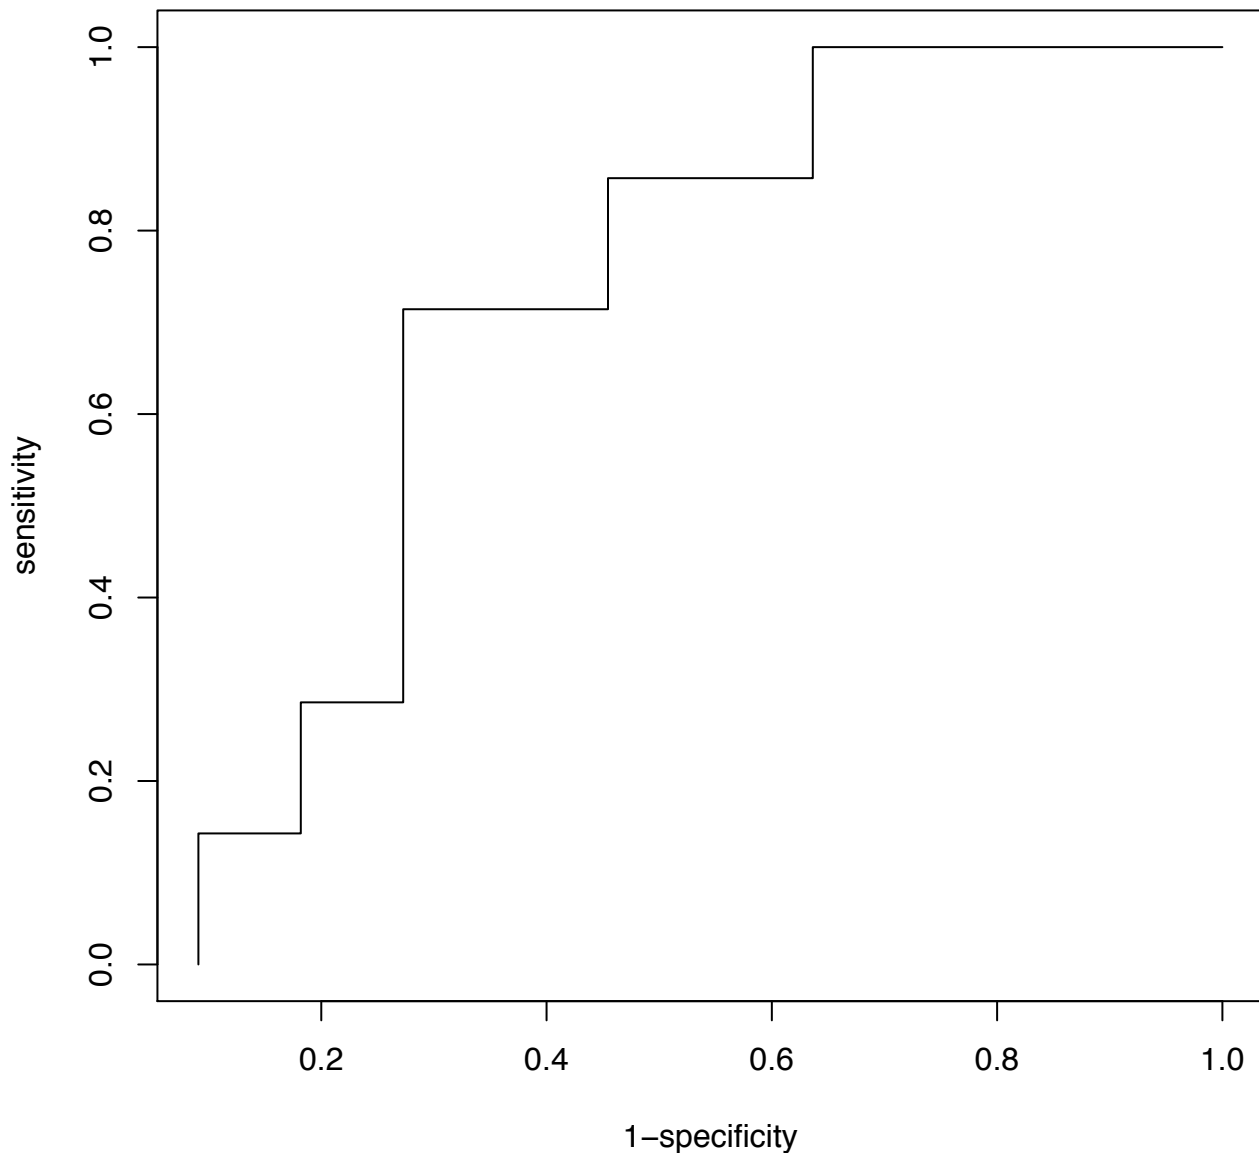

sortie: Her2 vs. LumA . Number of peptides: 40

ROC area = 0.62 p-value = 0.21

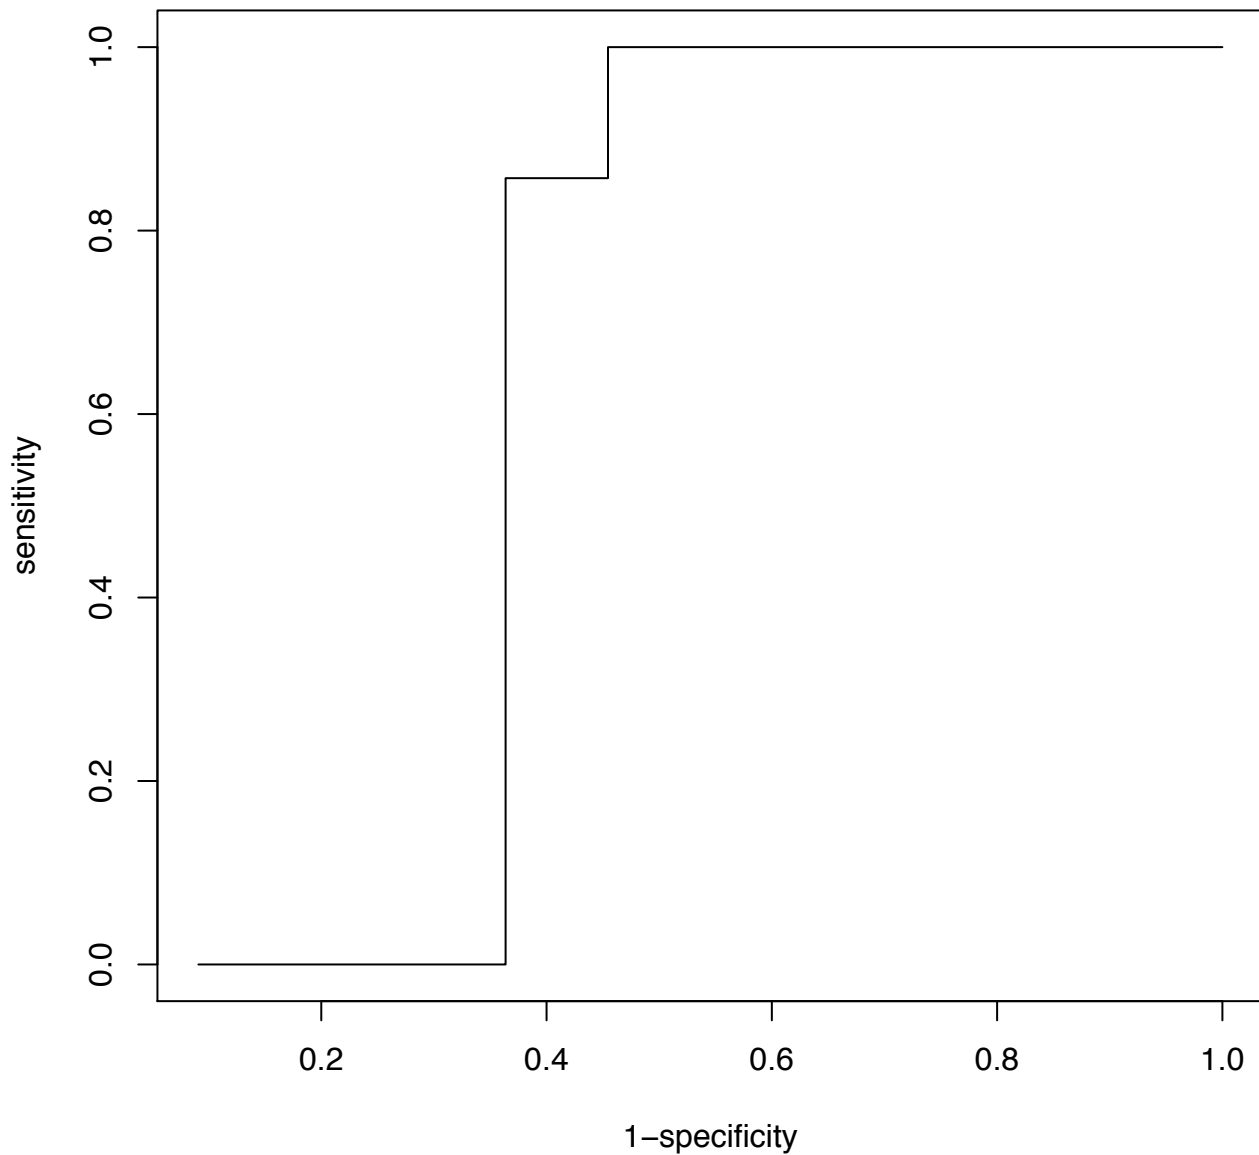

sorlie: Her2 vs. LumA . Number of peptides: 100

ROC area = 0.81 p-value = 0.017

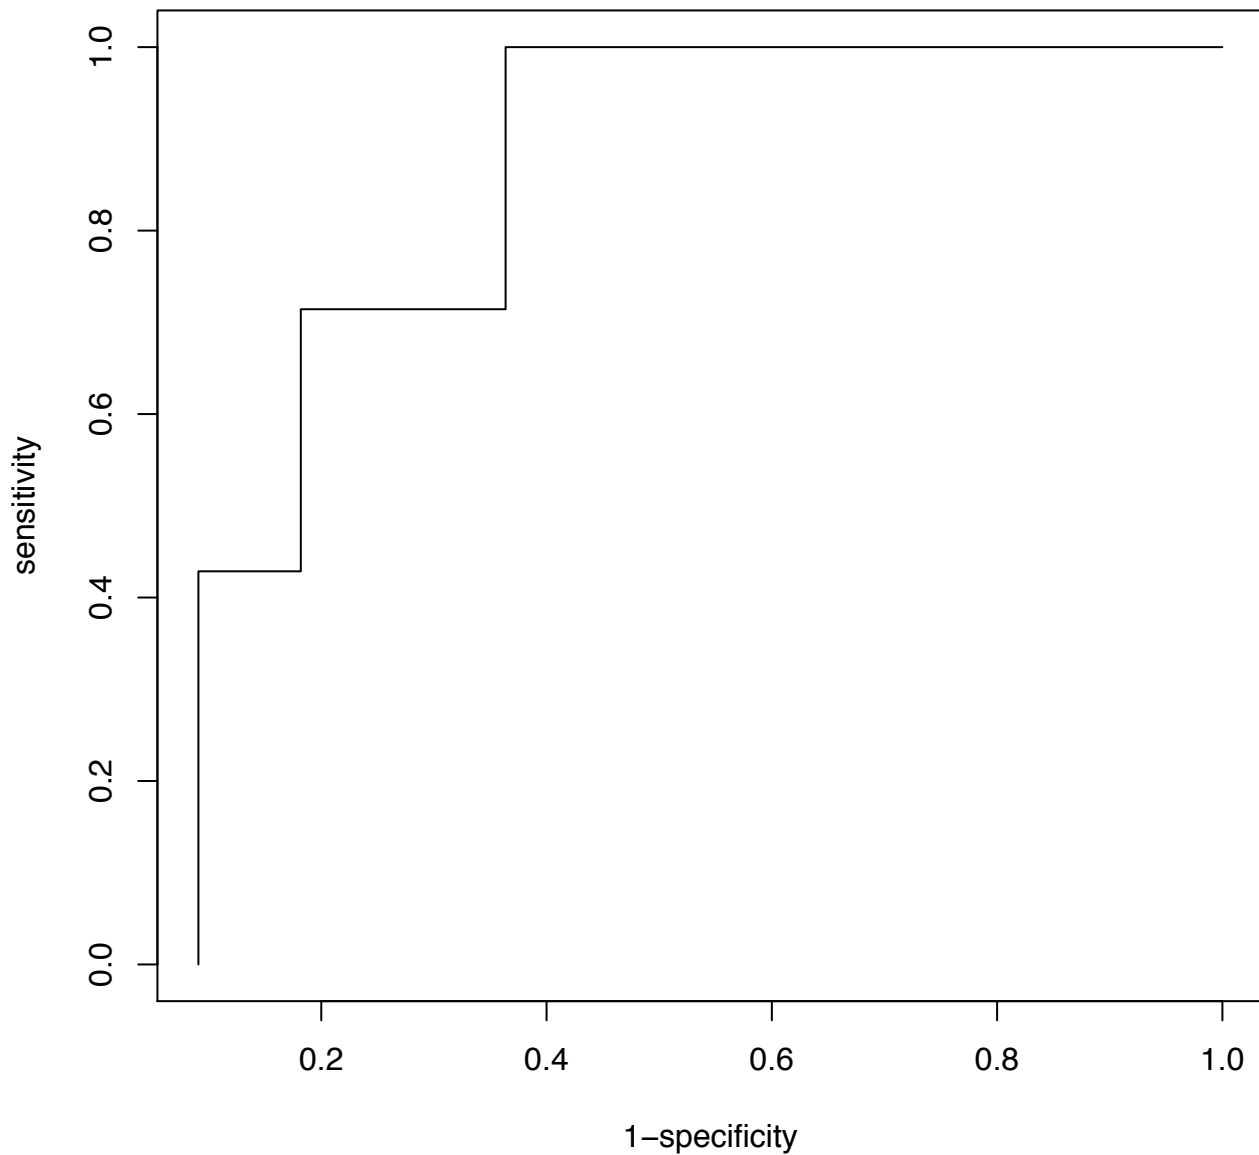



sortie: Her2 vs. LumA . Number of peptides: NA  
ROC area = 0.88 p-value = 0.003

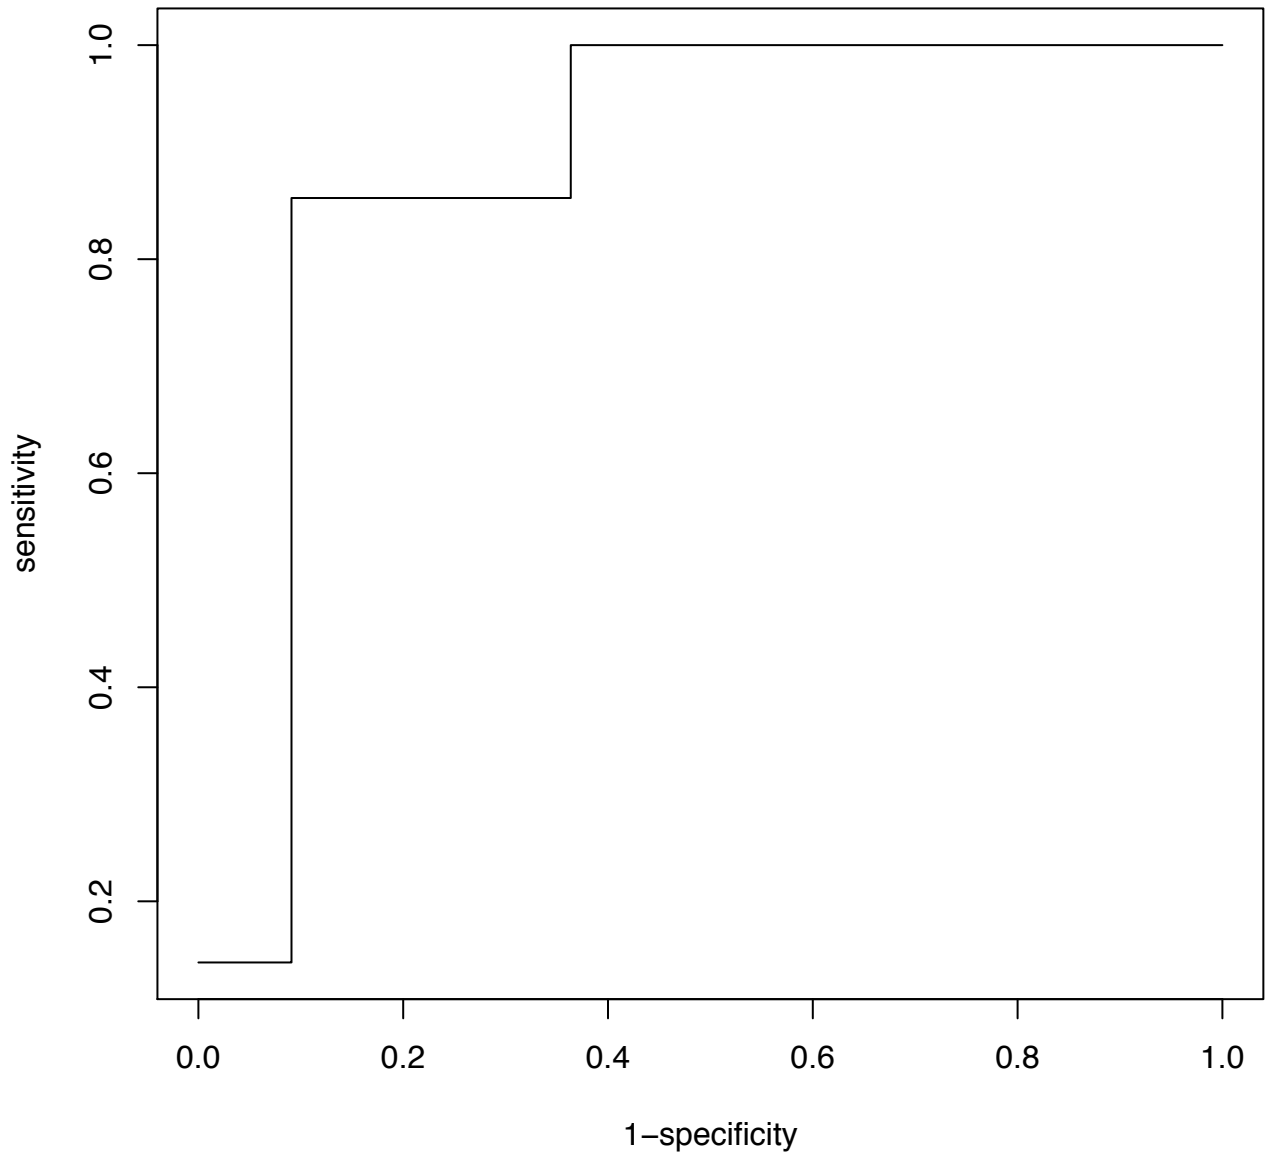

pam50: Her2 vs. LumA . Number of peptides: 20

ROC area = 1 p-value = 0.00058

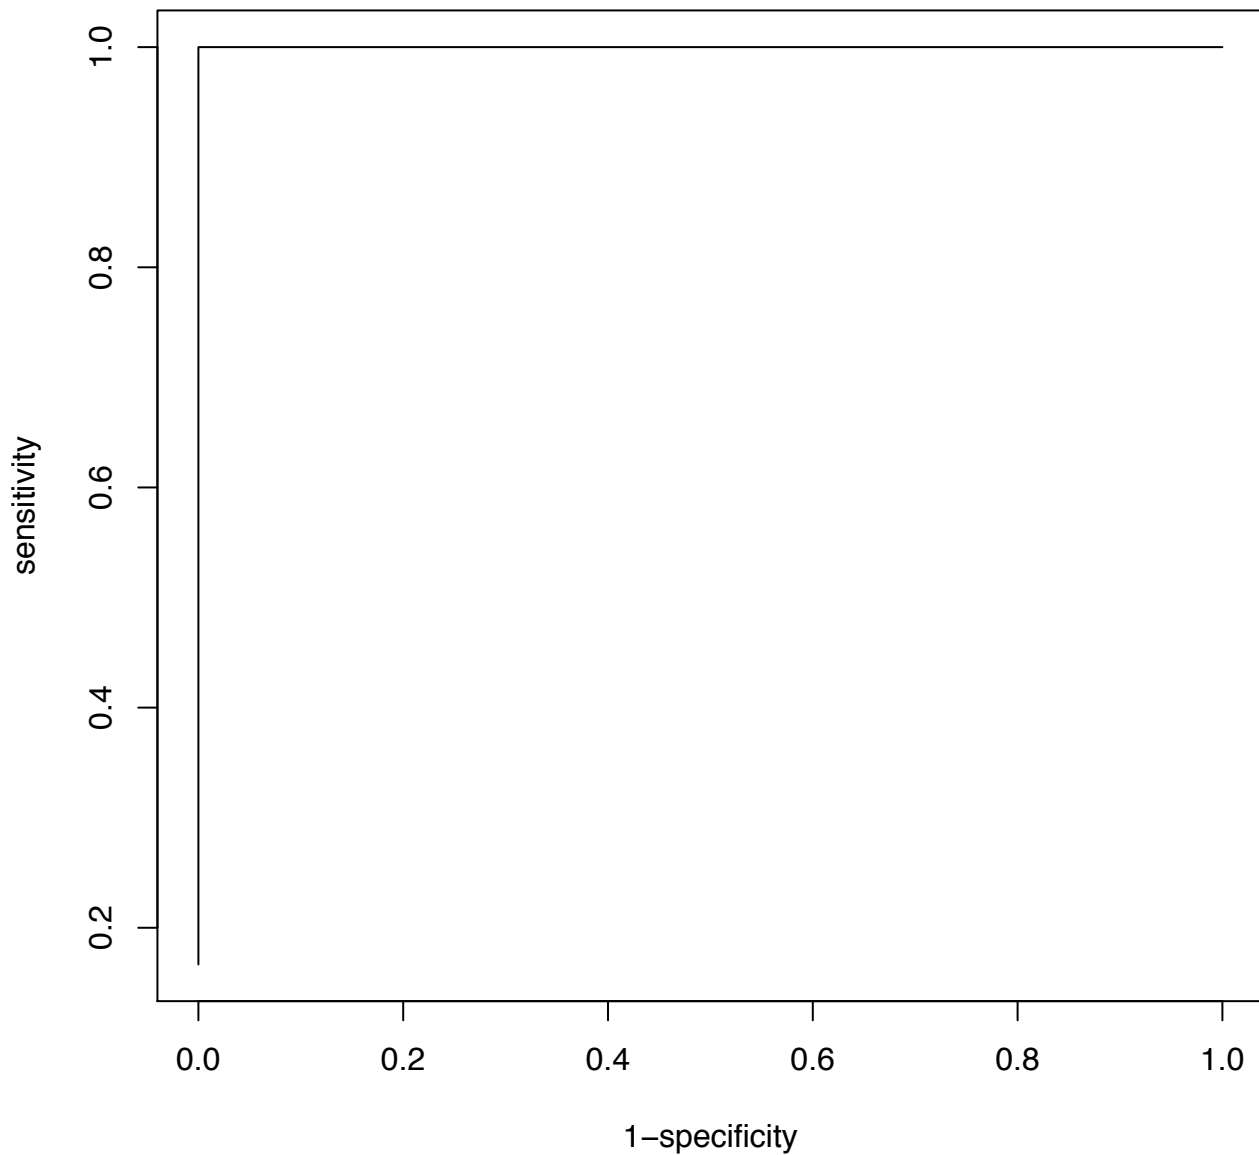

pam50: Her2 vs. LumA . Number of peptides: 30

ROC area = 0.98 p-value = 0.0012

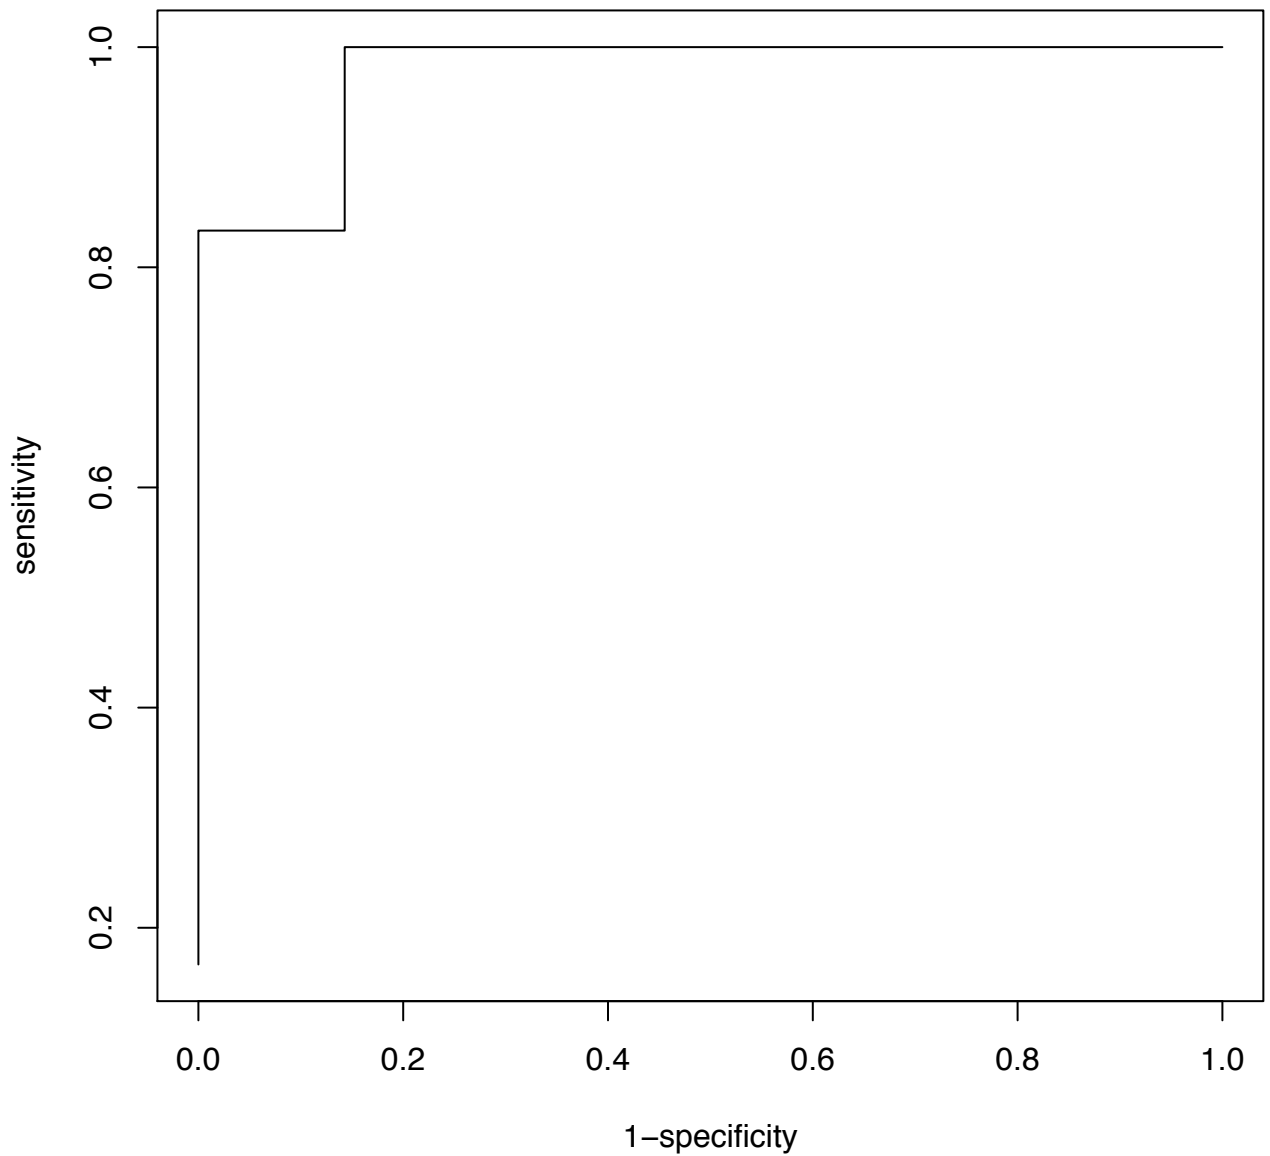

pam50: Her2 vs. LumA . Number of peptides: 40

ROC area = 1 p-value = 0.00058



pam50: Her2 vs. LumA . Number of peptides: 100

ROC area = 0.86 p-value = 0.017

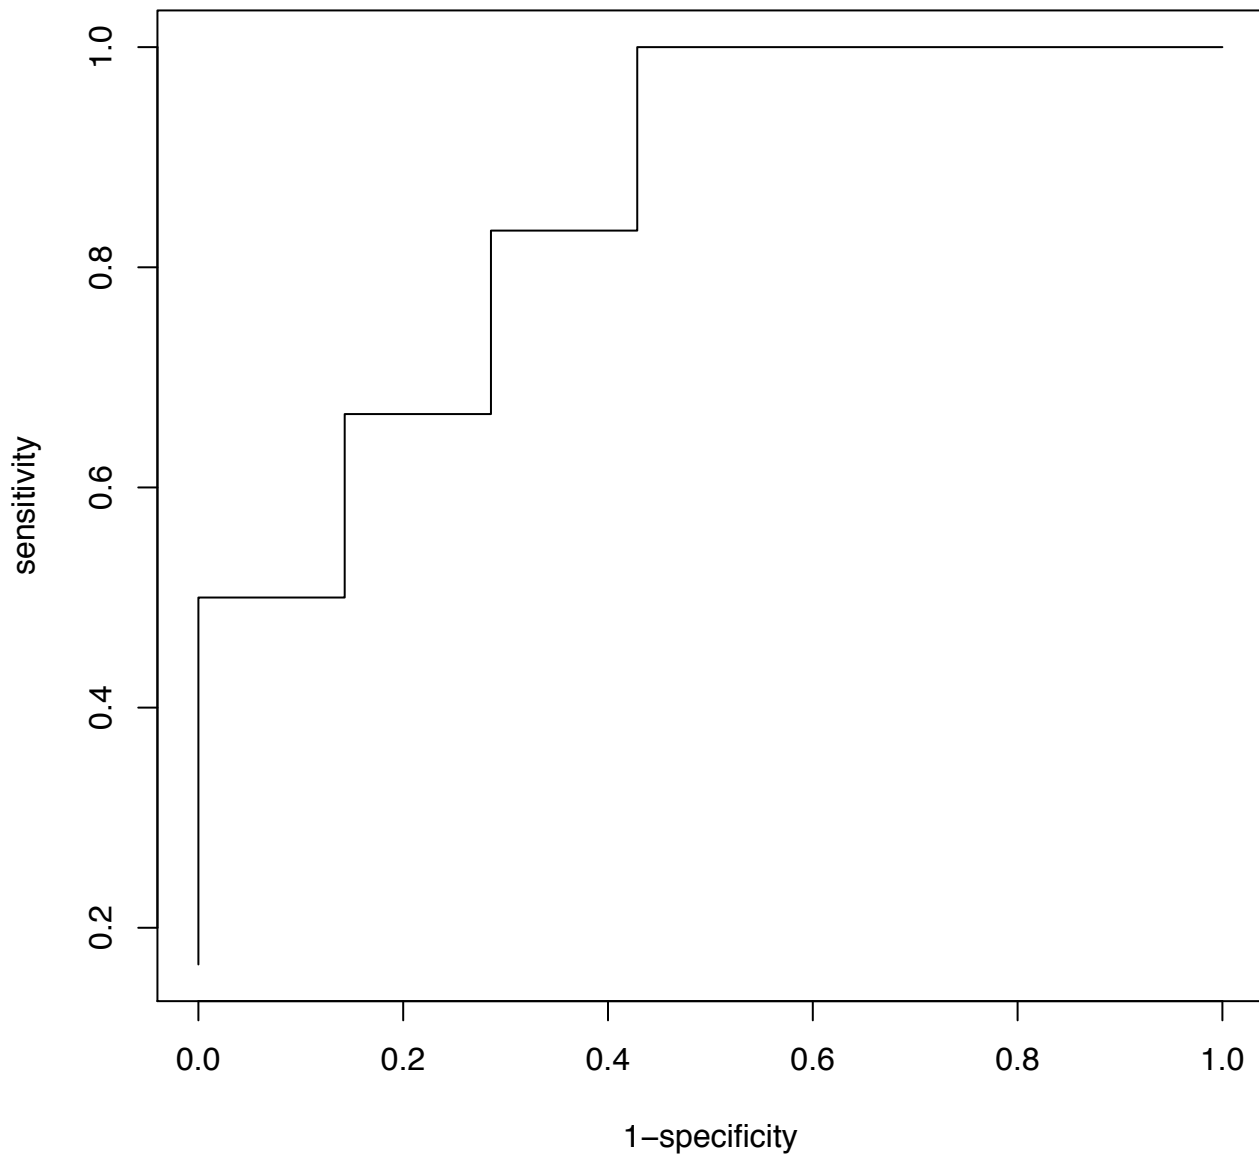

pam50: Her2 vs. LumA . Number of peptides: NA  
ROC area = 0.88 p-value = 0.011

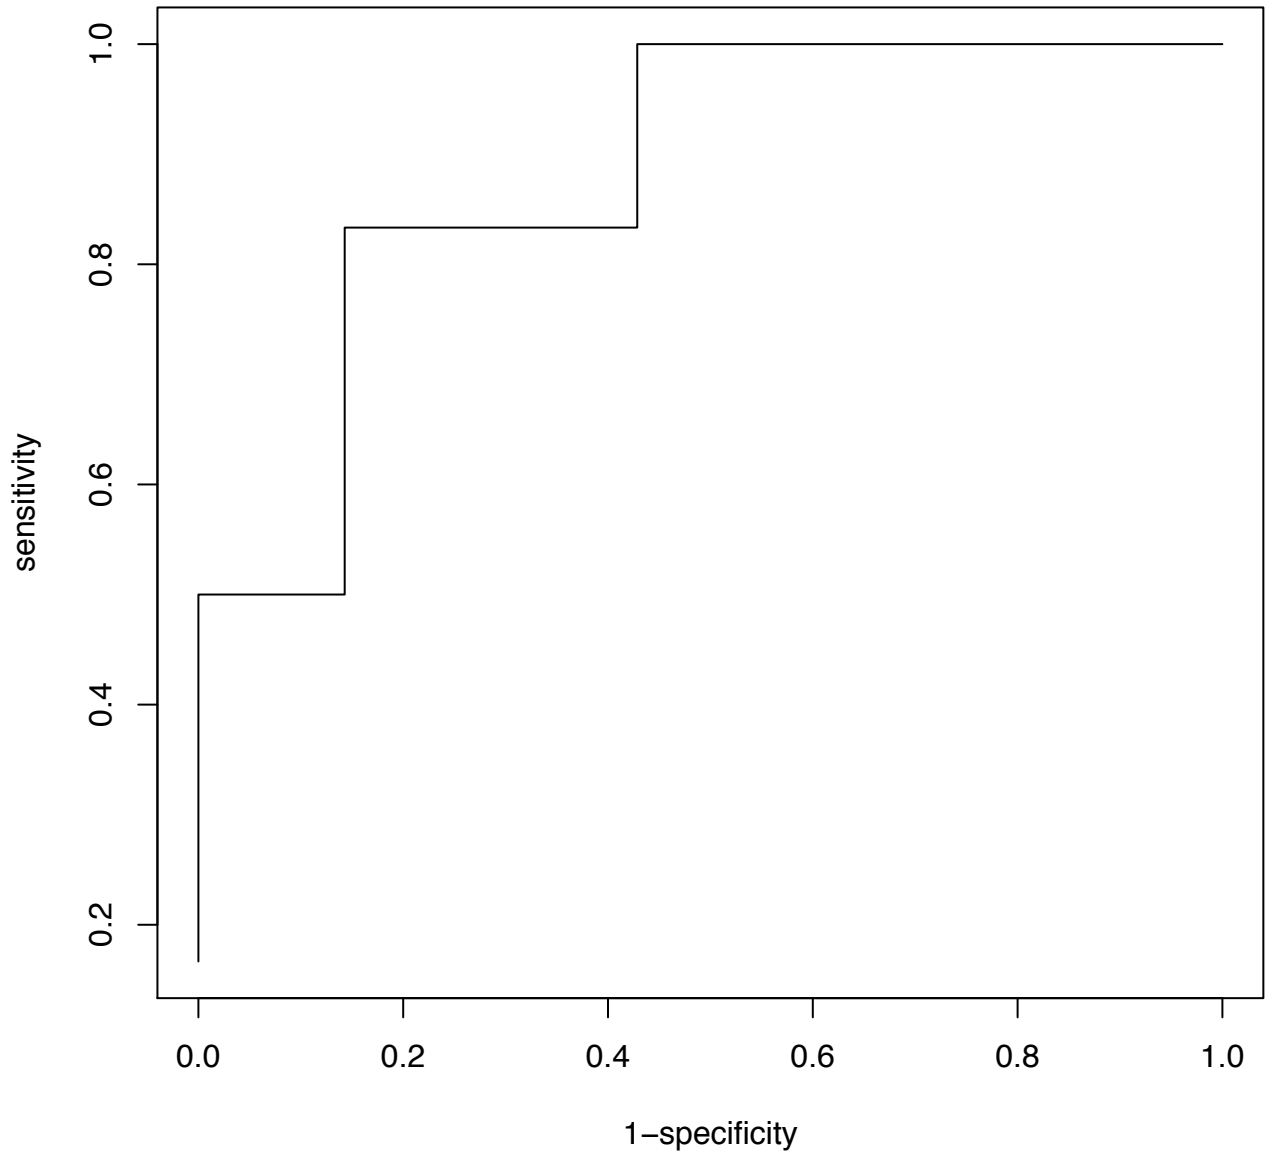

hu: Her2 vs. LumA . Number of peptides: 20

ROC area = 0.66 p-value = 0.21

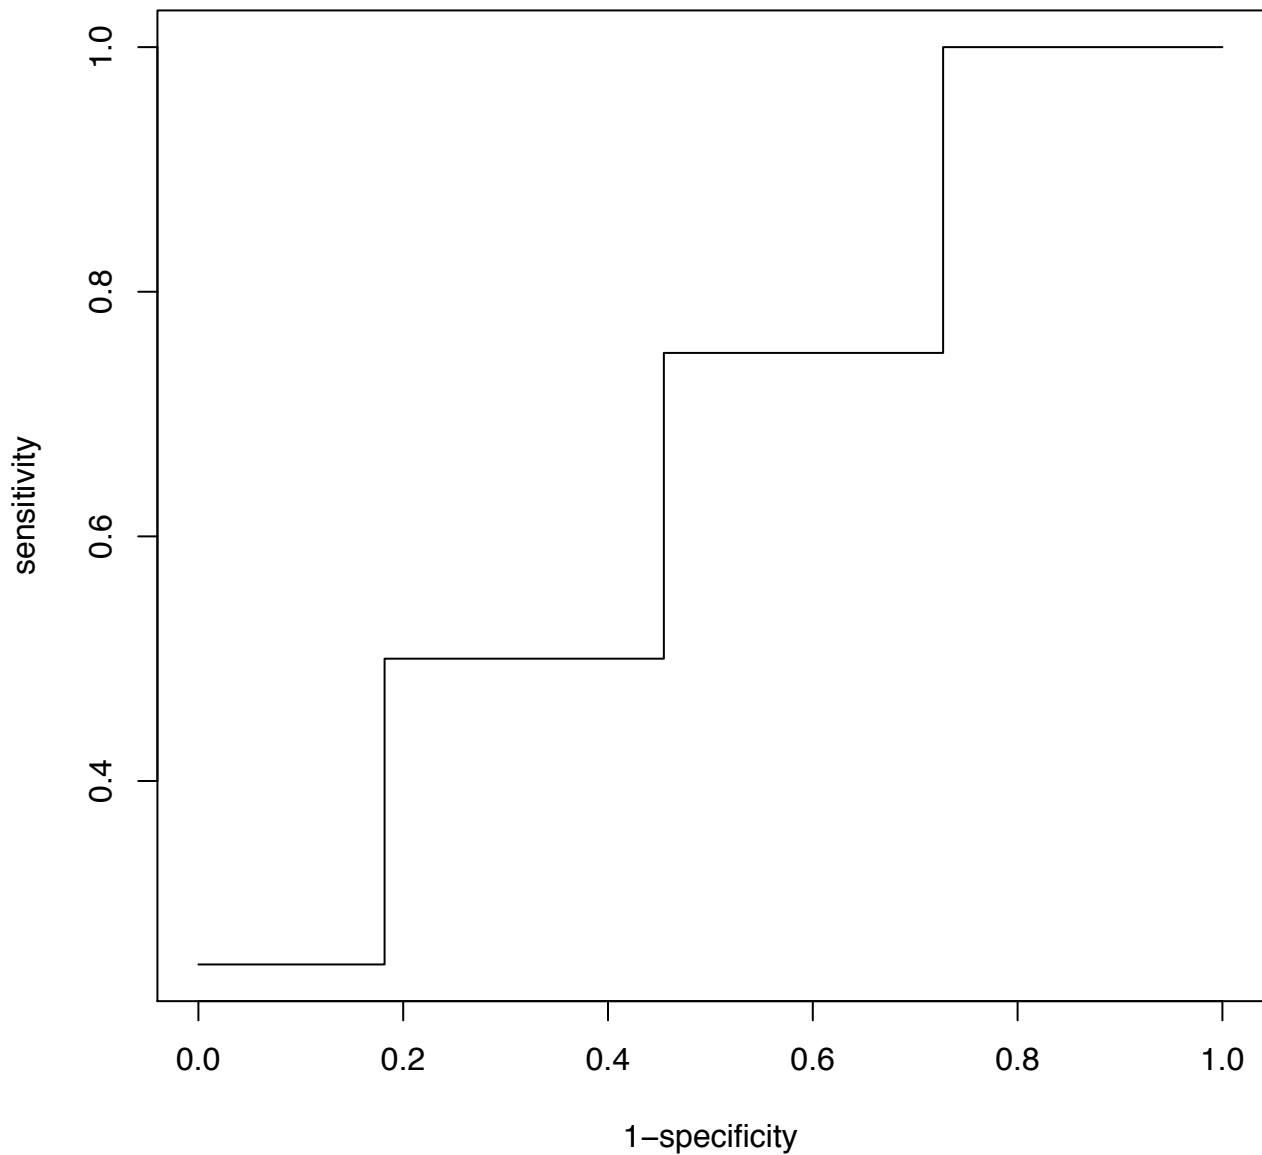

hu: Her2 vs. LumA . Number of peptides: 30

ROC area = 0.66 p-value = 0.21

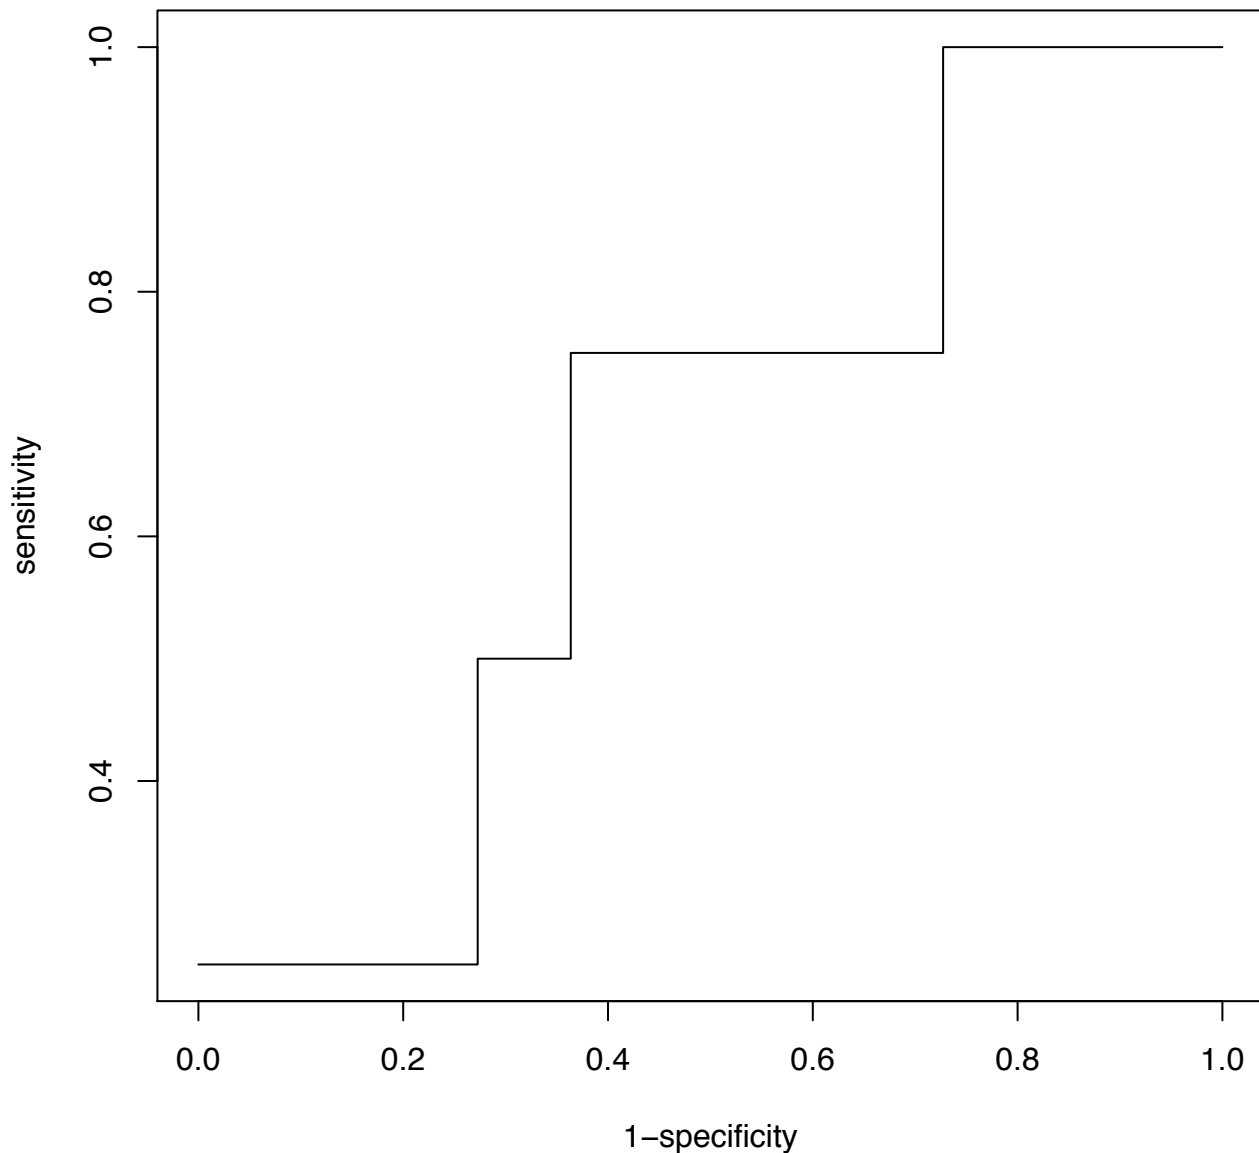



hu: Her2 vs. LumA . Number of peptides: 40

ROC area = 0.7 p-value = 0.14

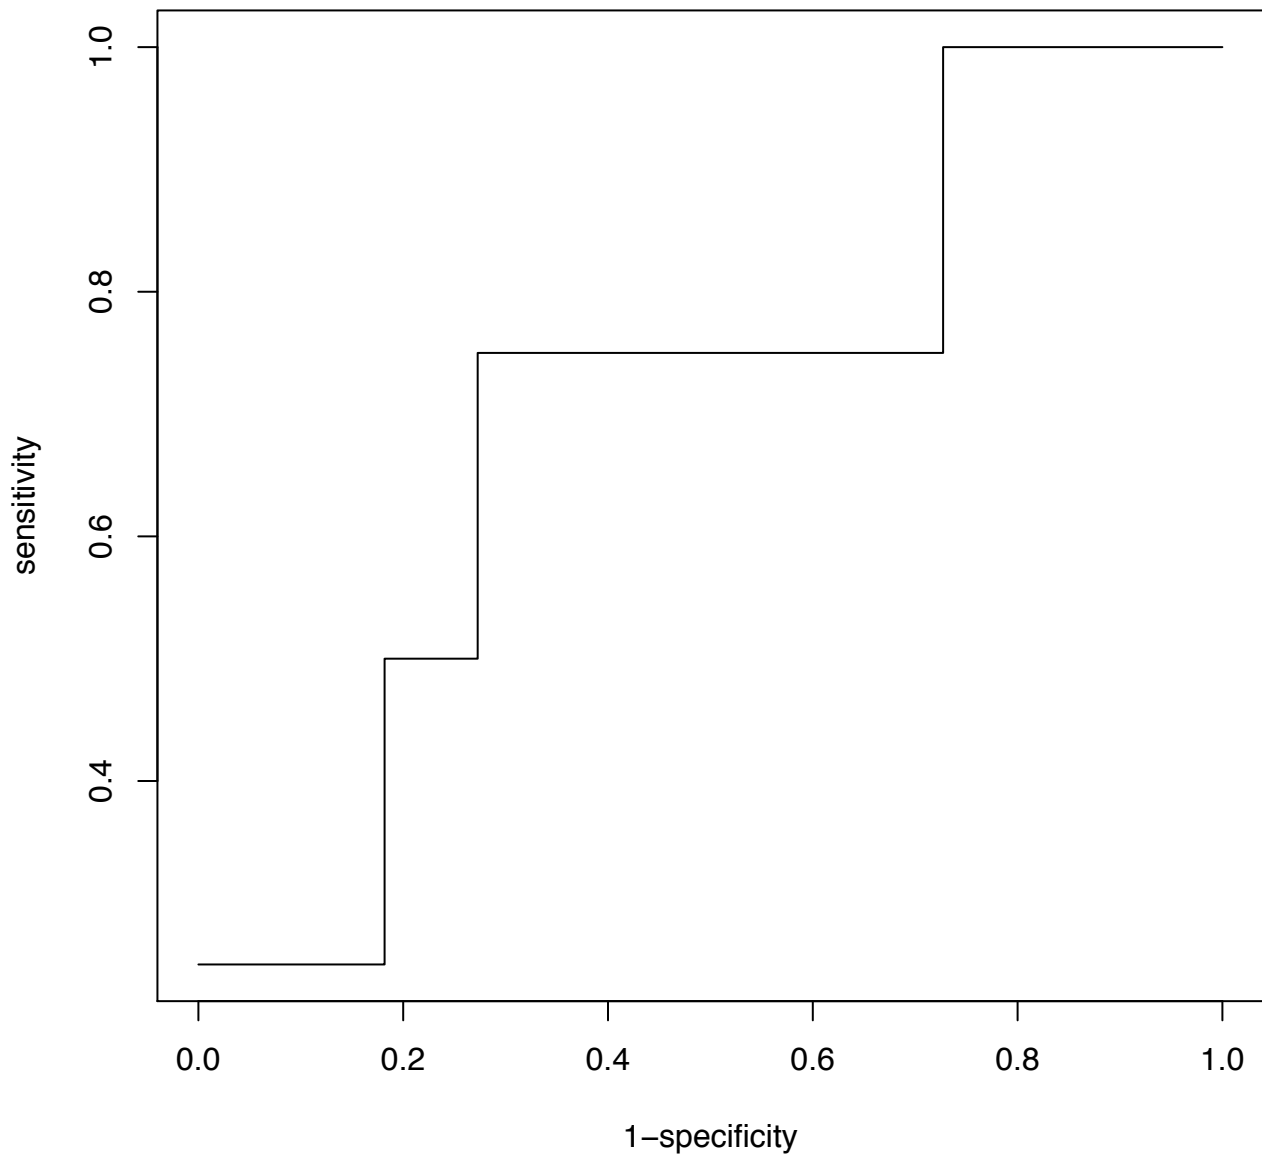

hu: Her2 vs. LumA . Number of peptides: 100

ROC area = 0.68 p-value = 0.17

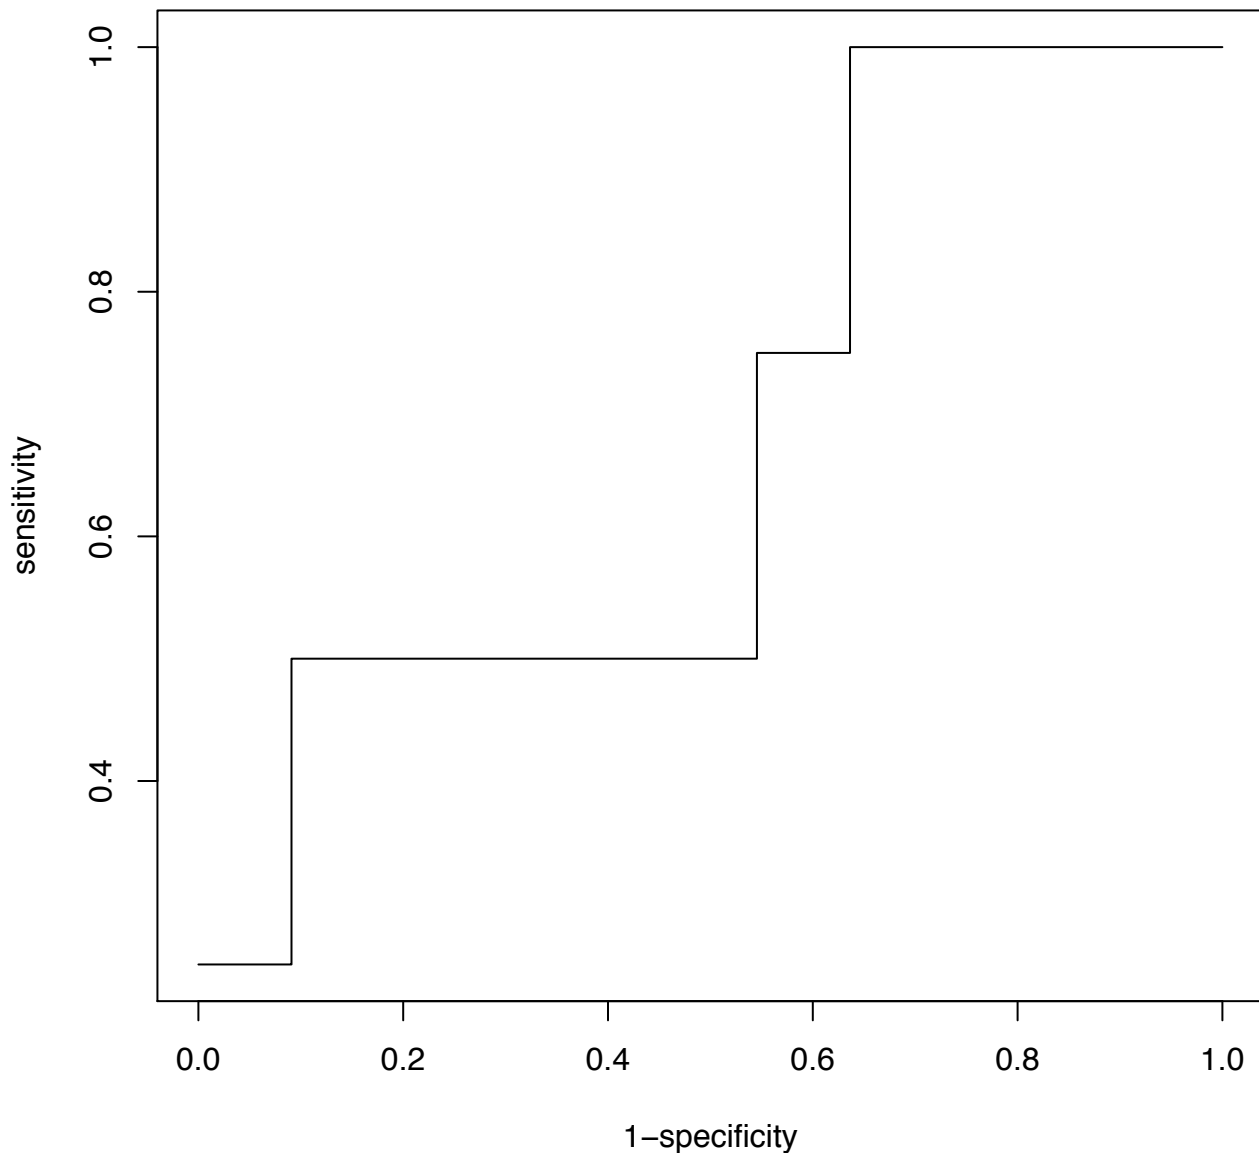

hu: Her2 vs. LumA . Number of peptides: NA

ROC area = 0.61 p-value = 0.29

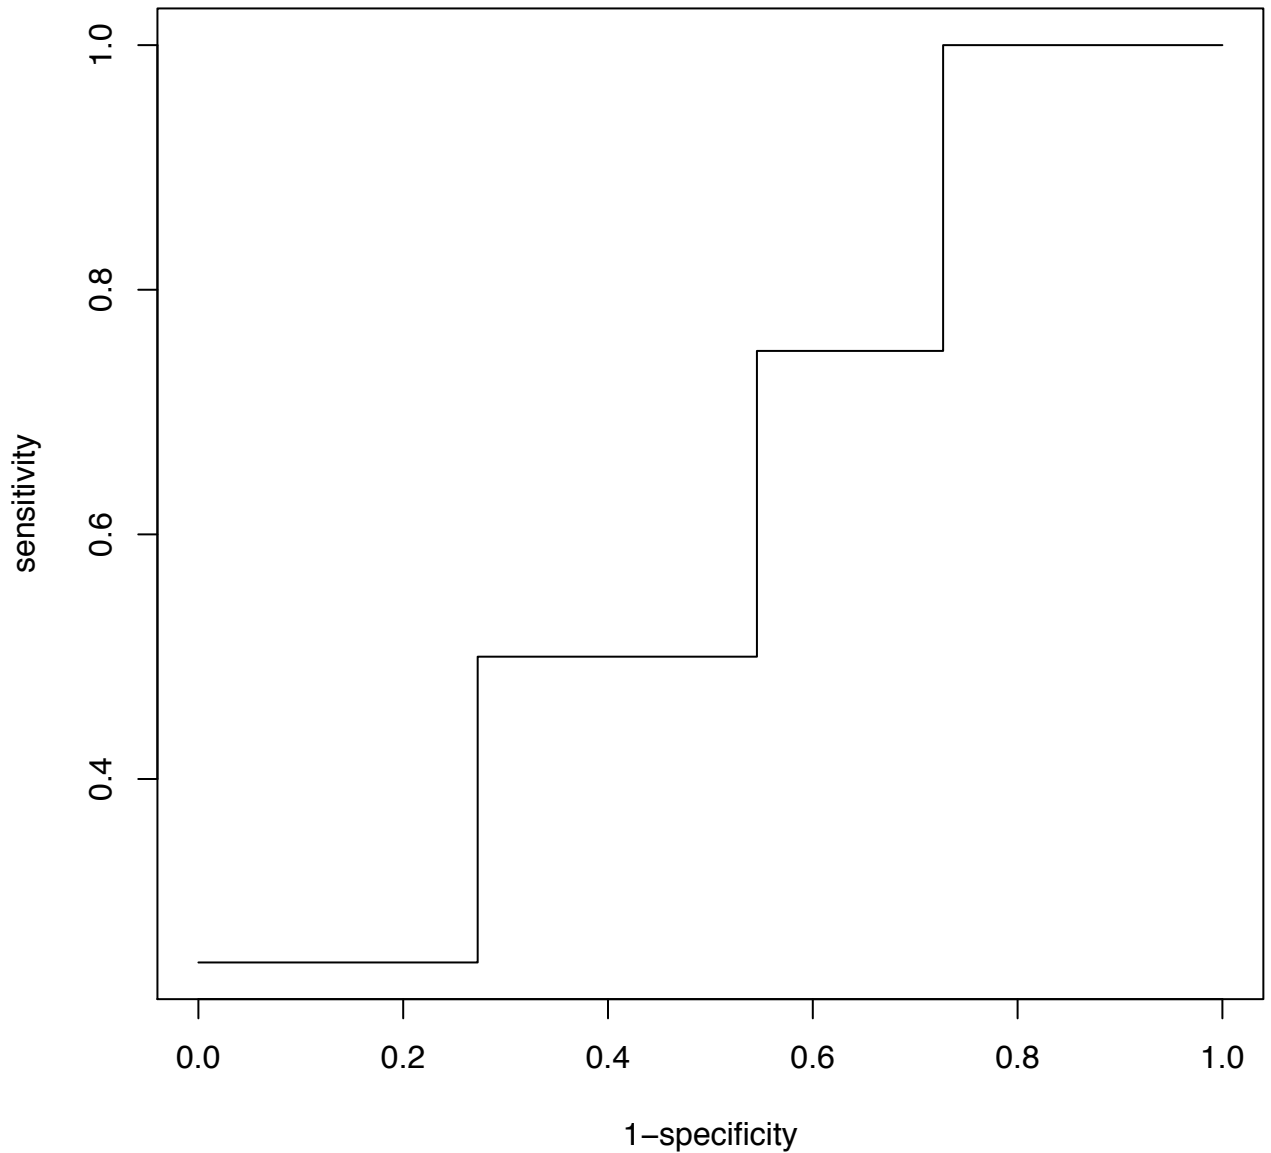

sortie: Her2 vs. LumB . Number of peptides: 20  
ROC area = 0.21 p-value = 0.95

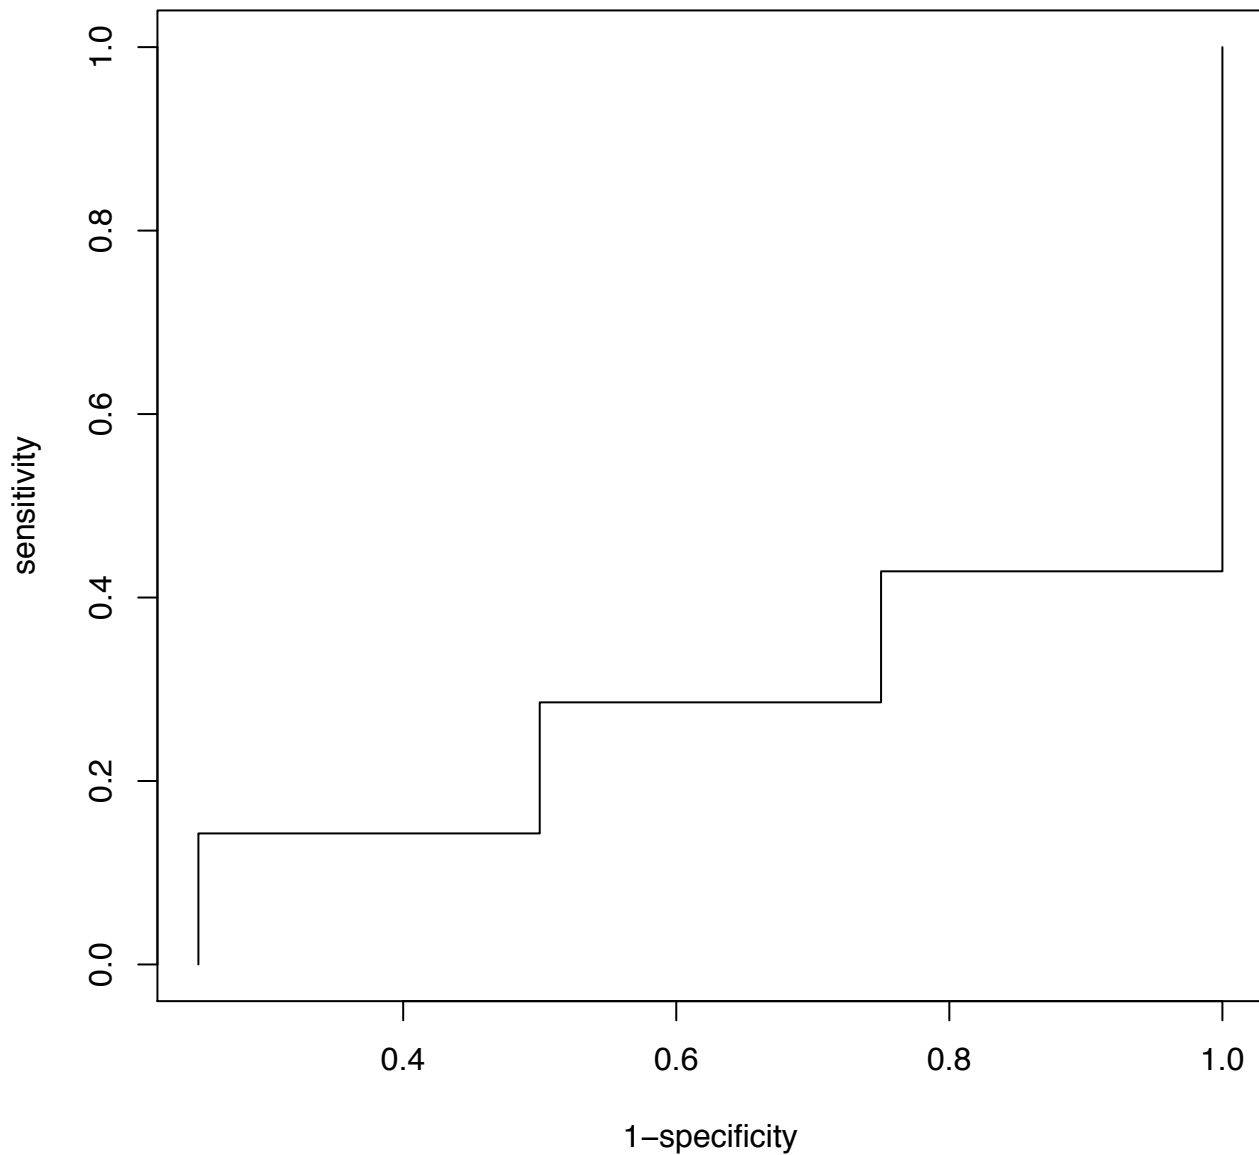

sortie: Her2 vs. LumB . Number of peptides: 30

ROC area = 0.21 p-value = 0.95

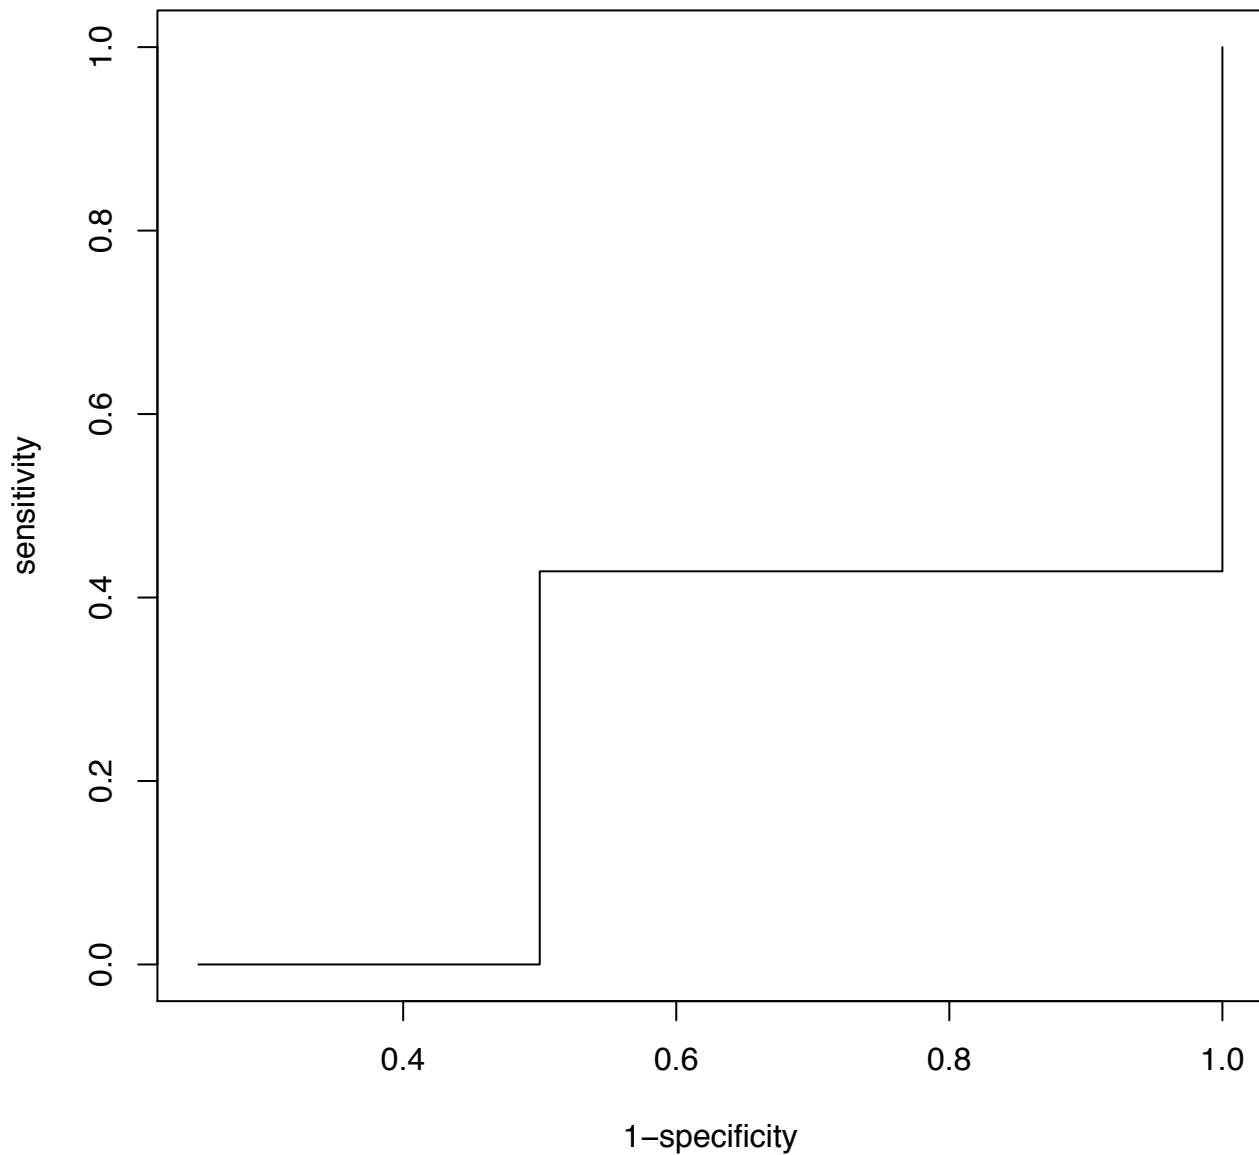

sortie: Her2 vs. LumB . Number of peptides: 40  
ROC area = 0.43 p-value = 0.68

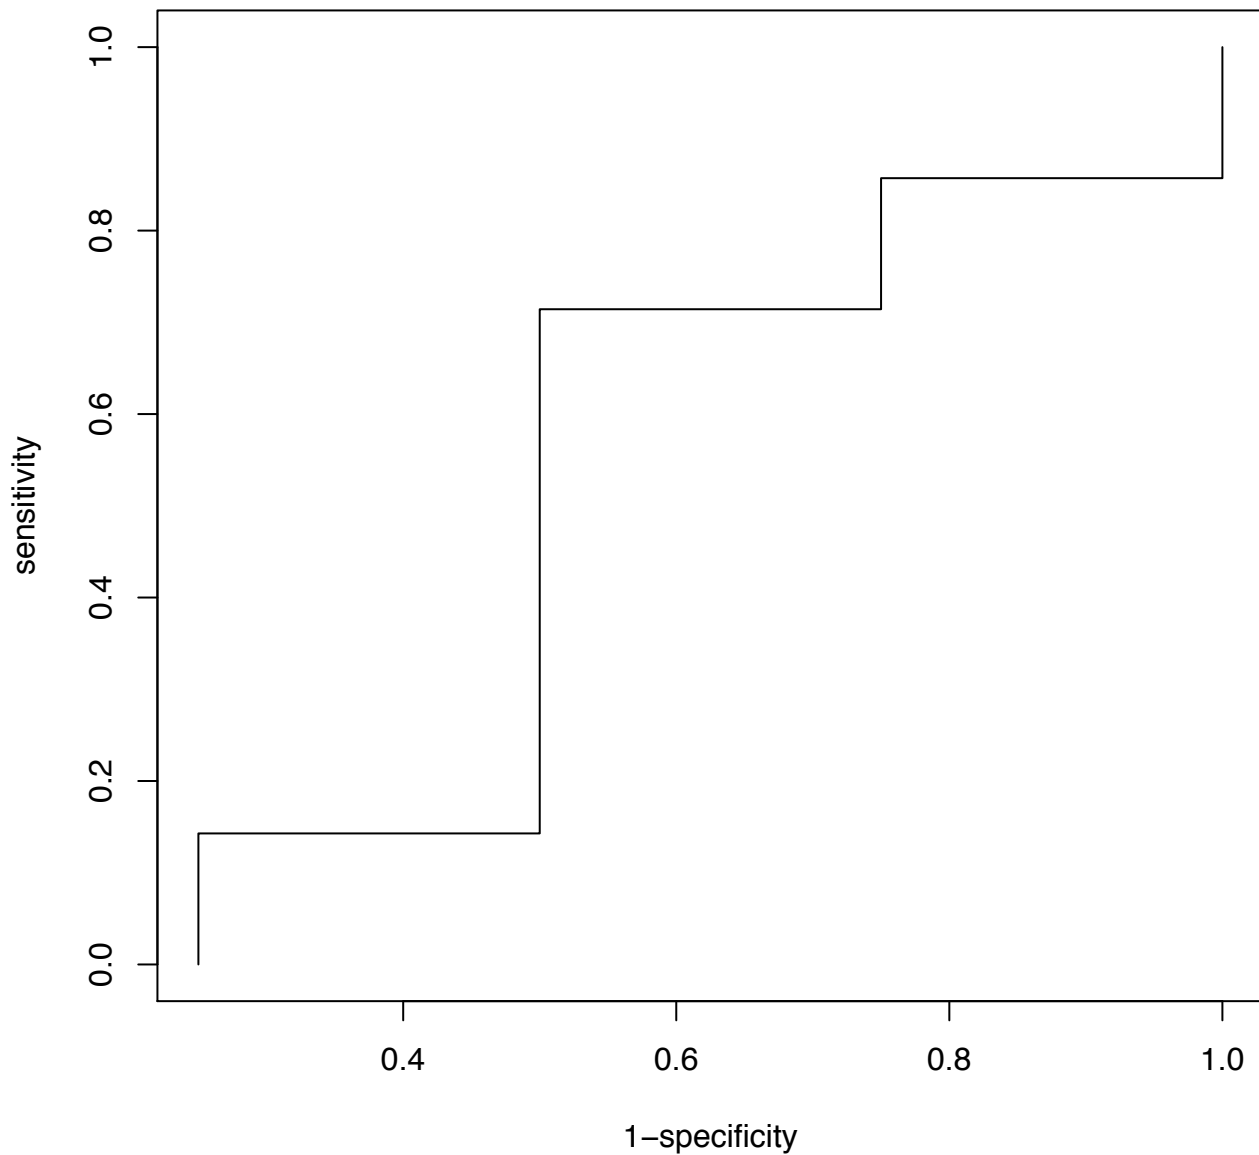

sorlie: Her2 vs. LumB . Number of peptides: 100

ROC area = 0.57 p-value = 0.39

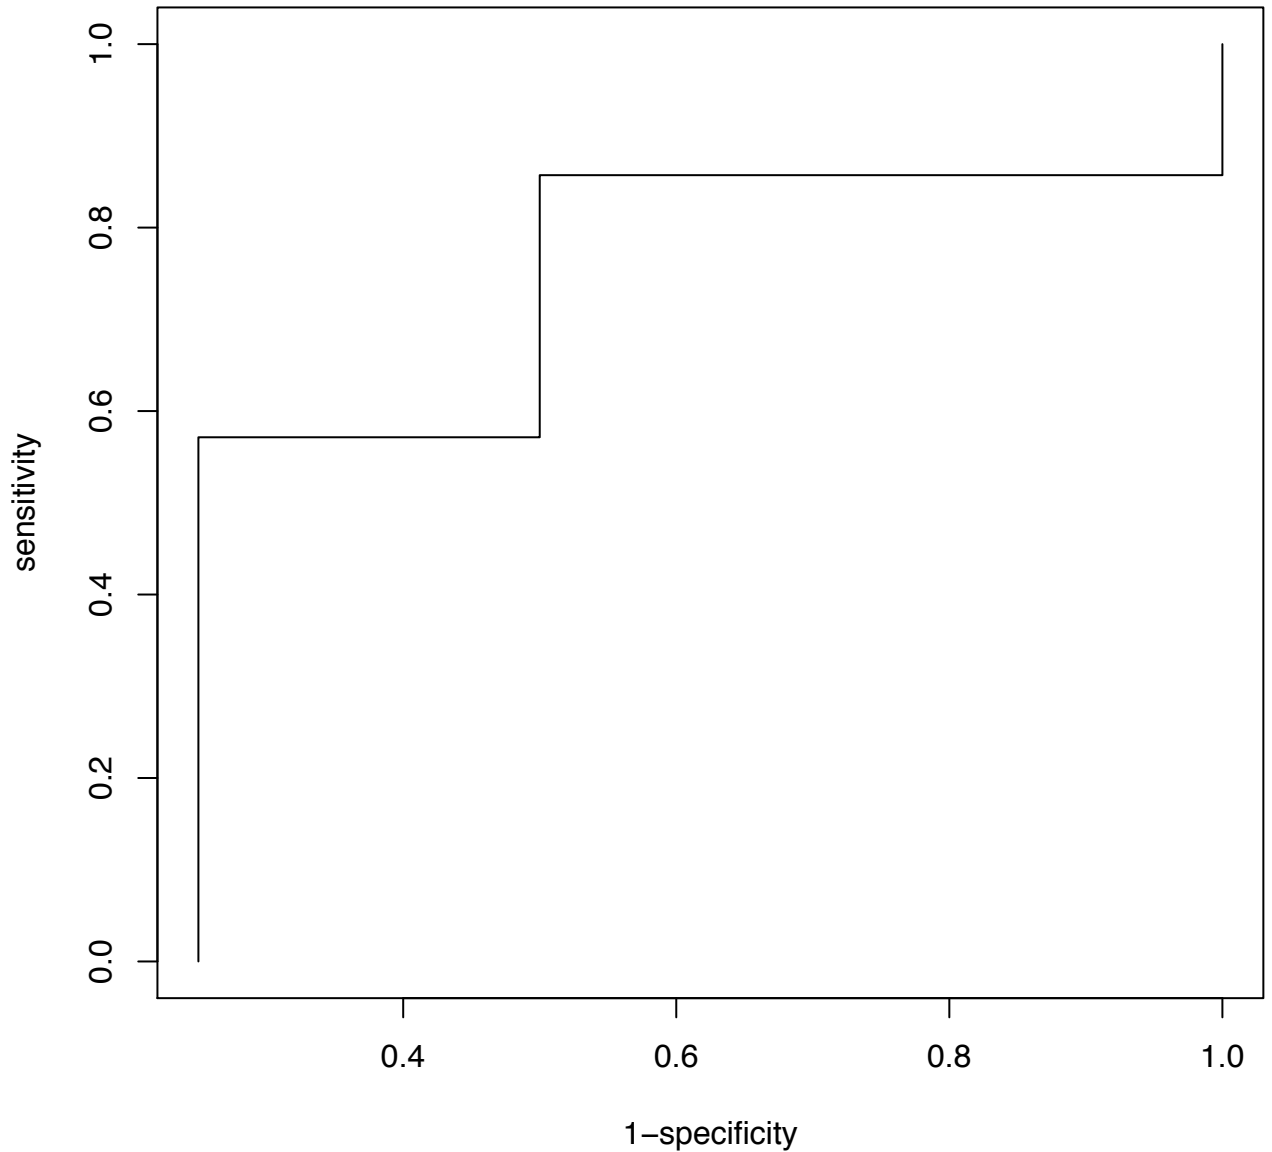

sortie: Her2 vs. LumB . Number of peptides: NA  
ROC area = 0.64 p-value = 0.26

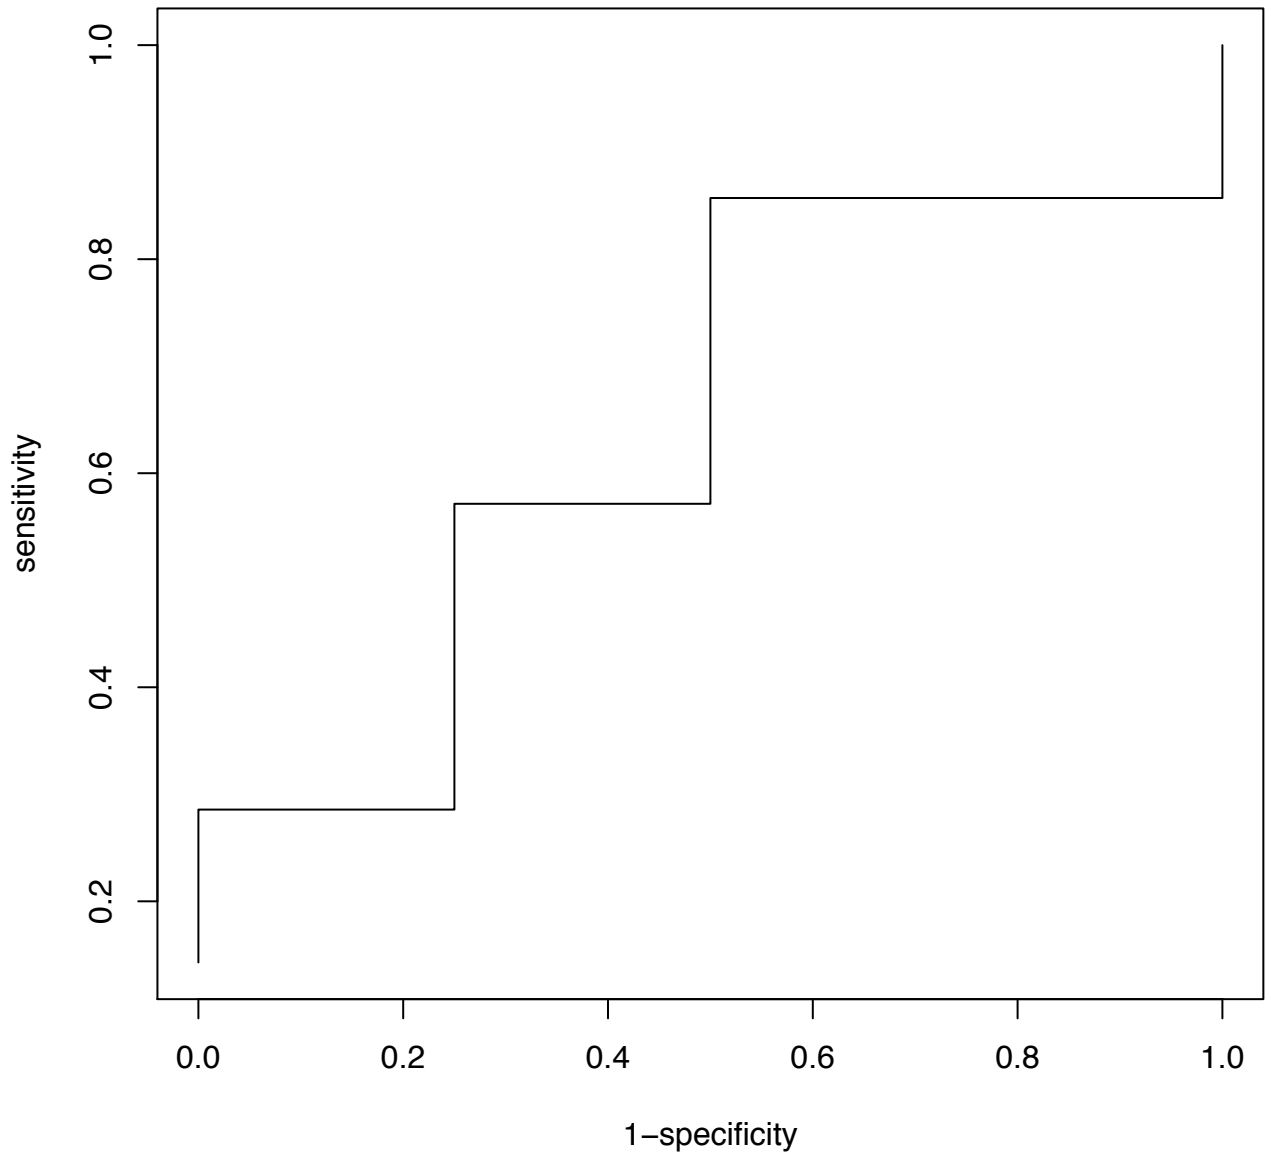



pam50: Her2 vs. LumB . Number of peptides: 20

ROC area = 0.43 p-value = 0.69

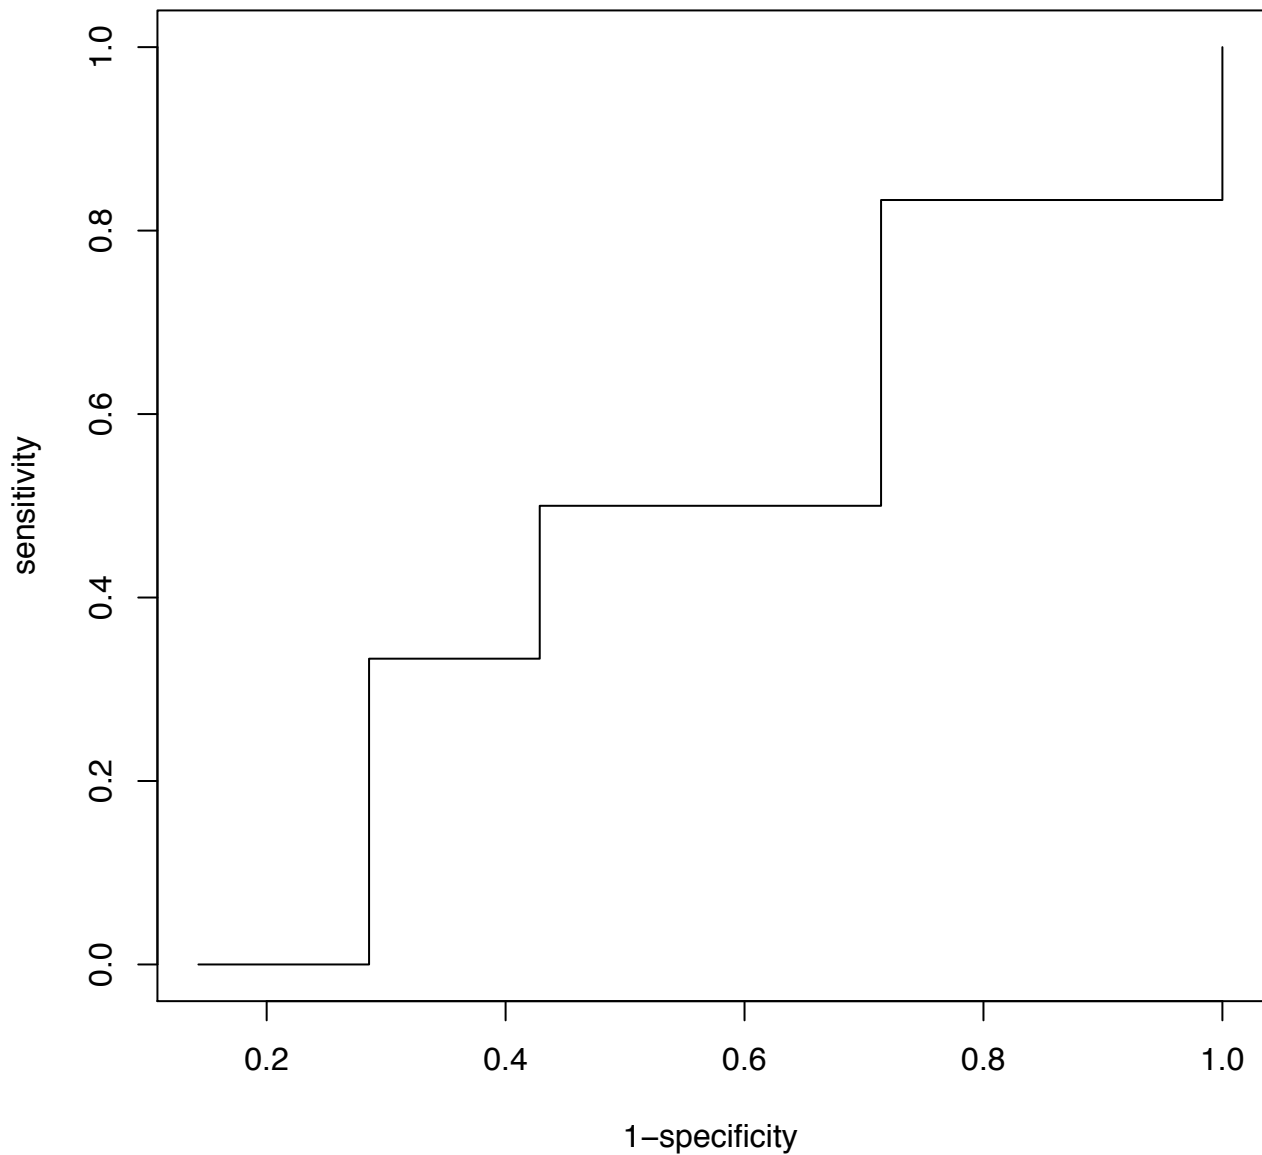

pam50: Her2 vs. LumB . Number of peptides: 30

ROC area = 0.24 p-value = 0.95

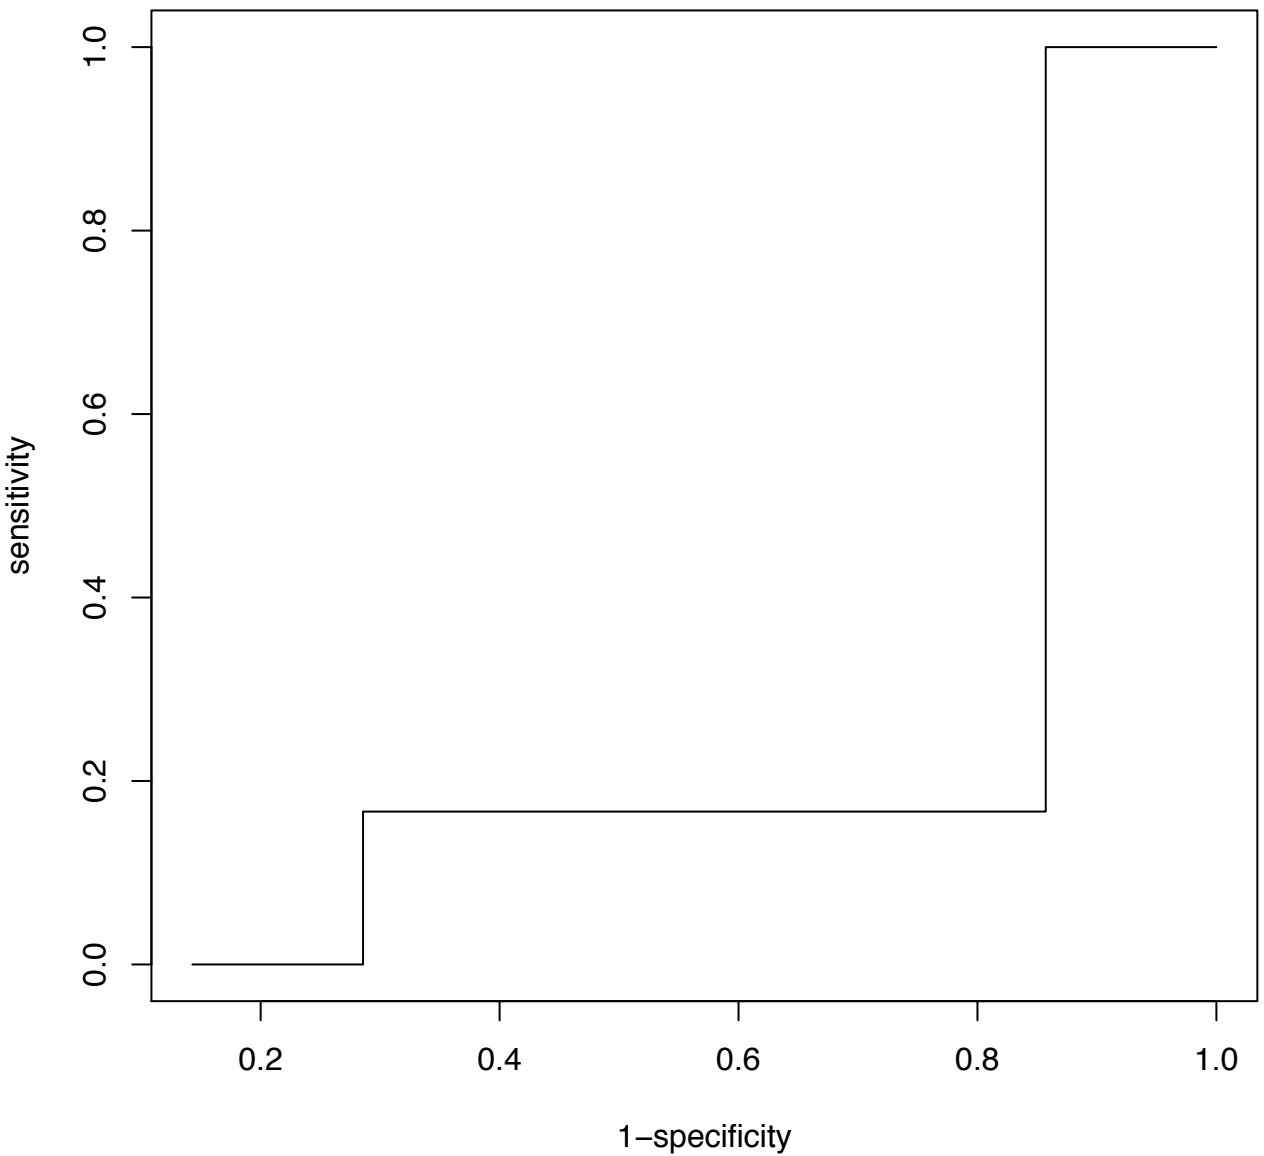

pam50: Her2 vs. LumB . Number of peptides: 40

ROC area = 0.26 p-value = 0.93

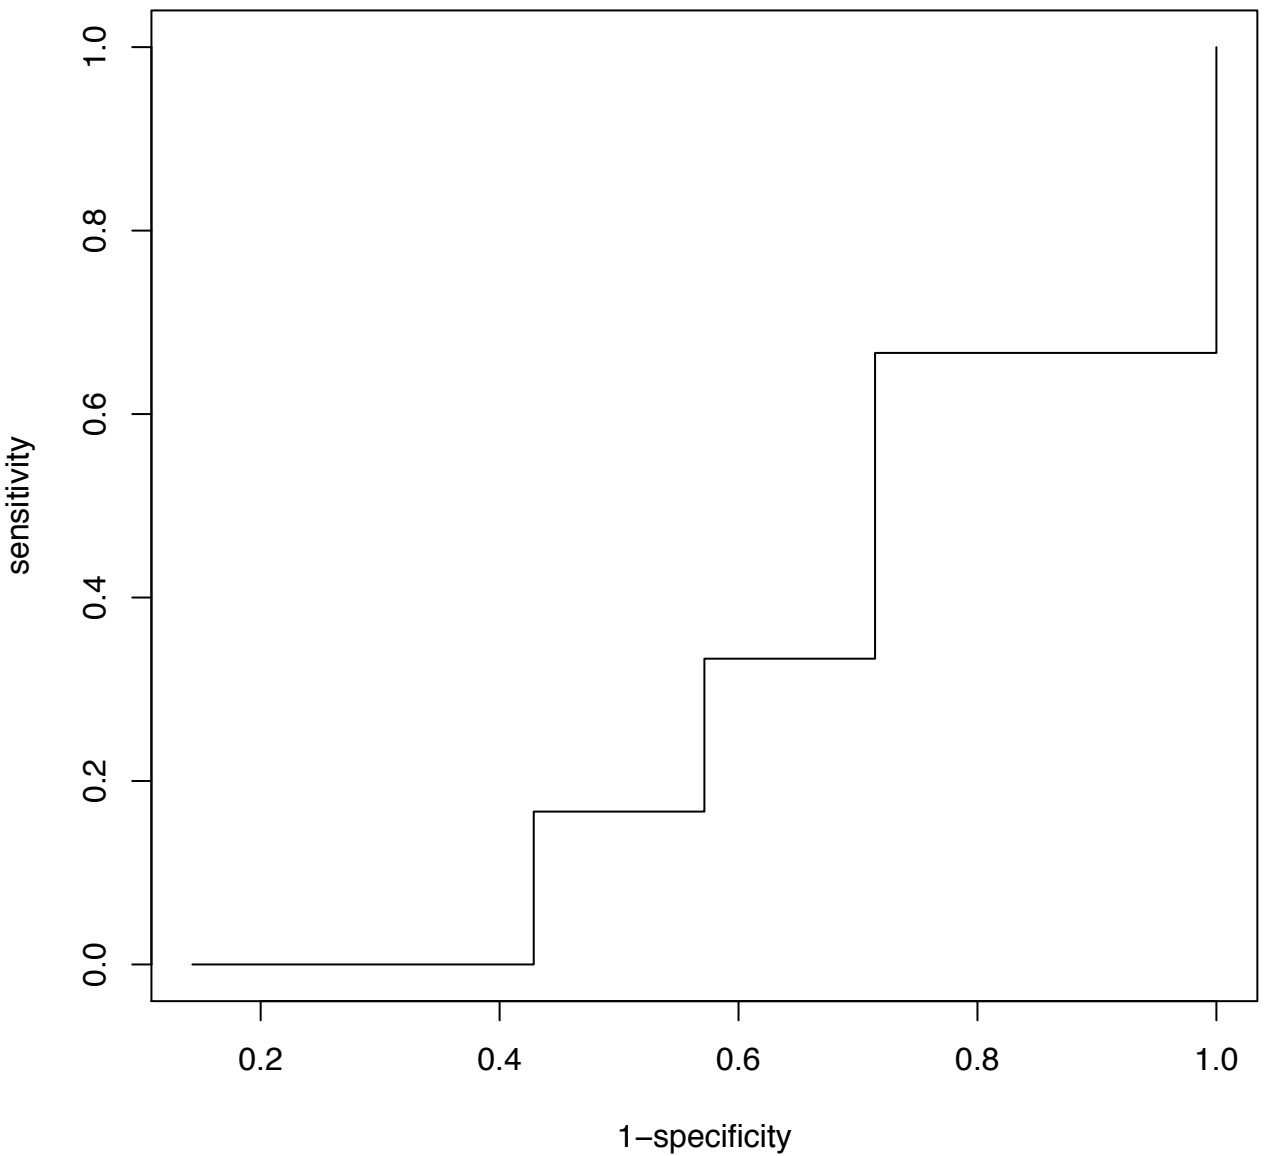

pam50: Her2 vs. LumB . Number of peptides: 100

ROC area = 0.26 p-value = 0.93

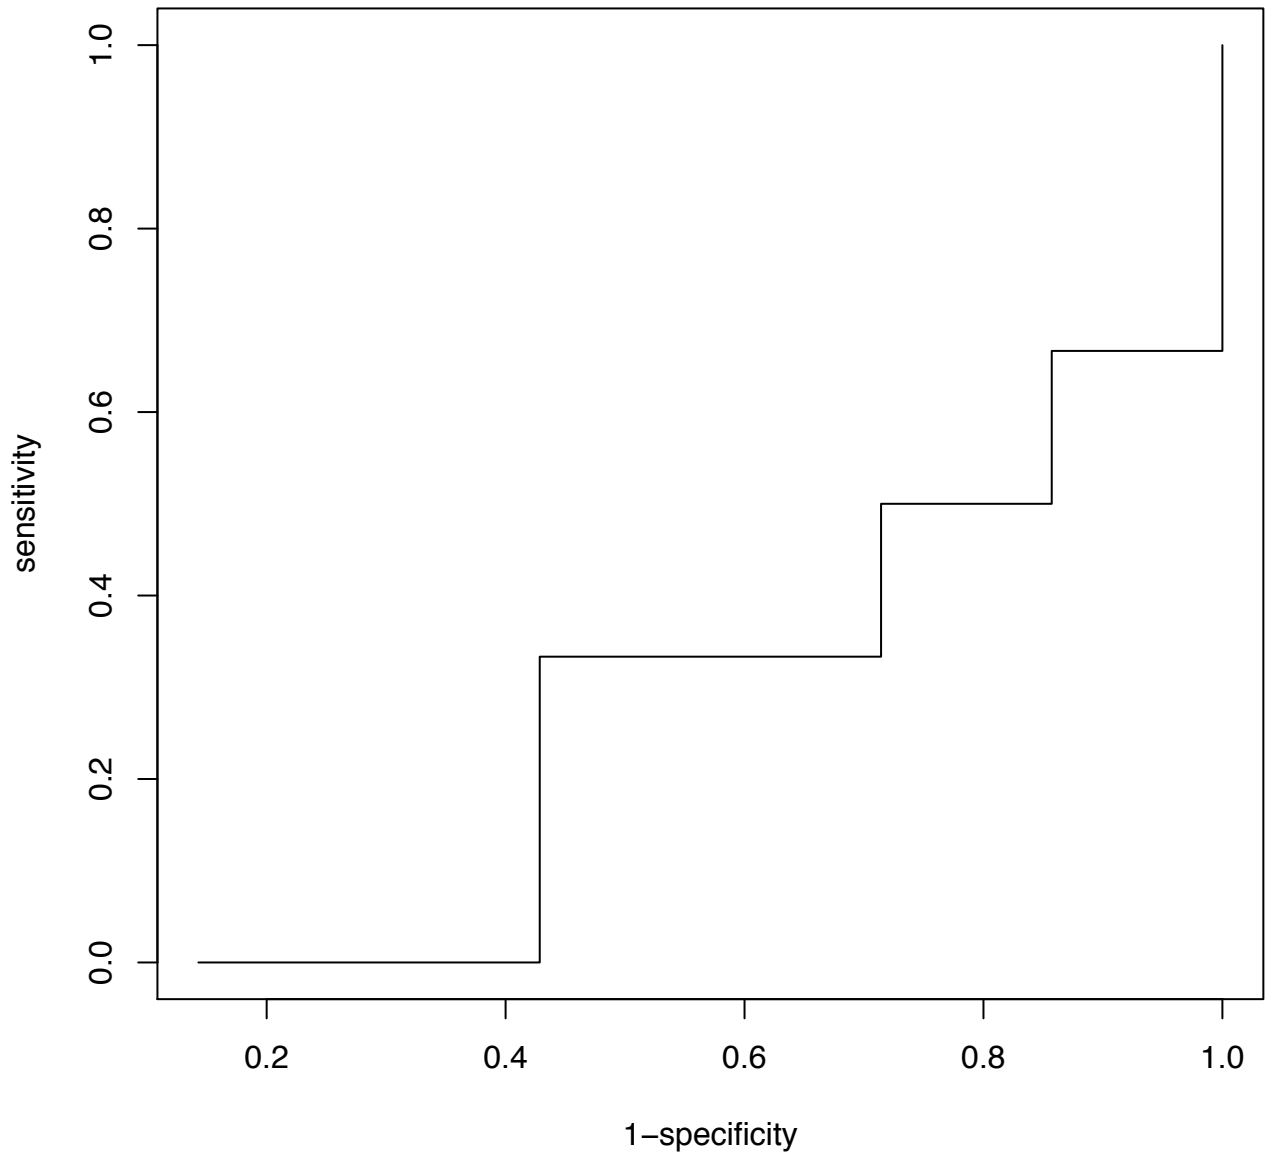

pam50: Her2 vs. LumB . Number of peptides: NA  
ROC area = 0.29 p-value = 0.91

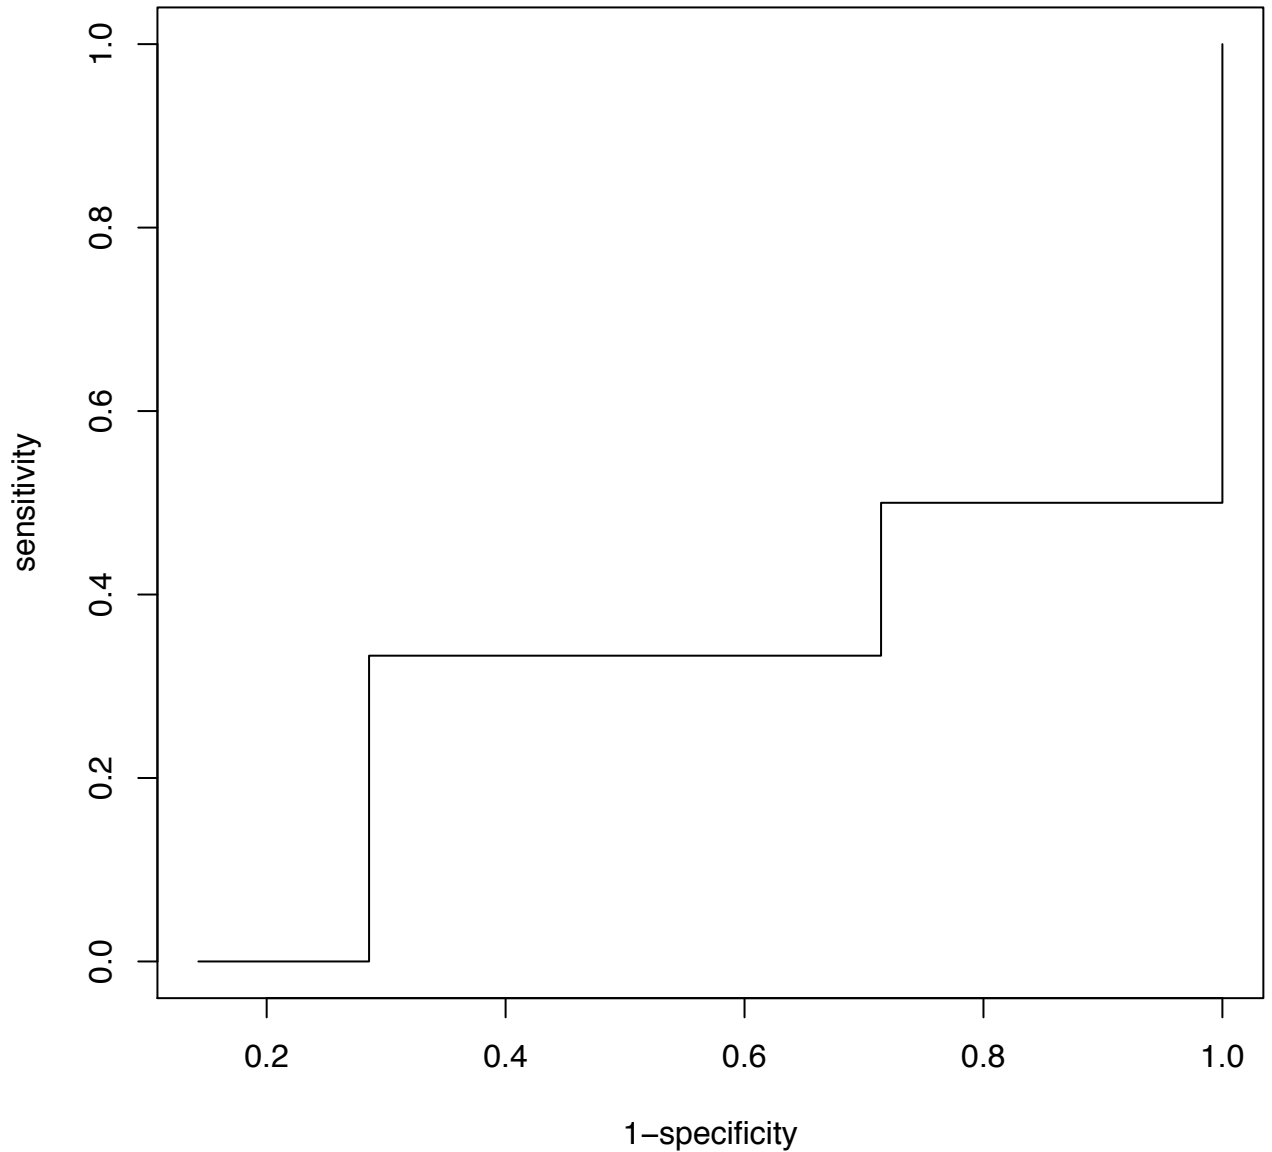

hu: Her2 vs. LumB . Number of peptides: 20

ROC area = 0.62 p-value = 0.34

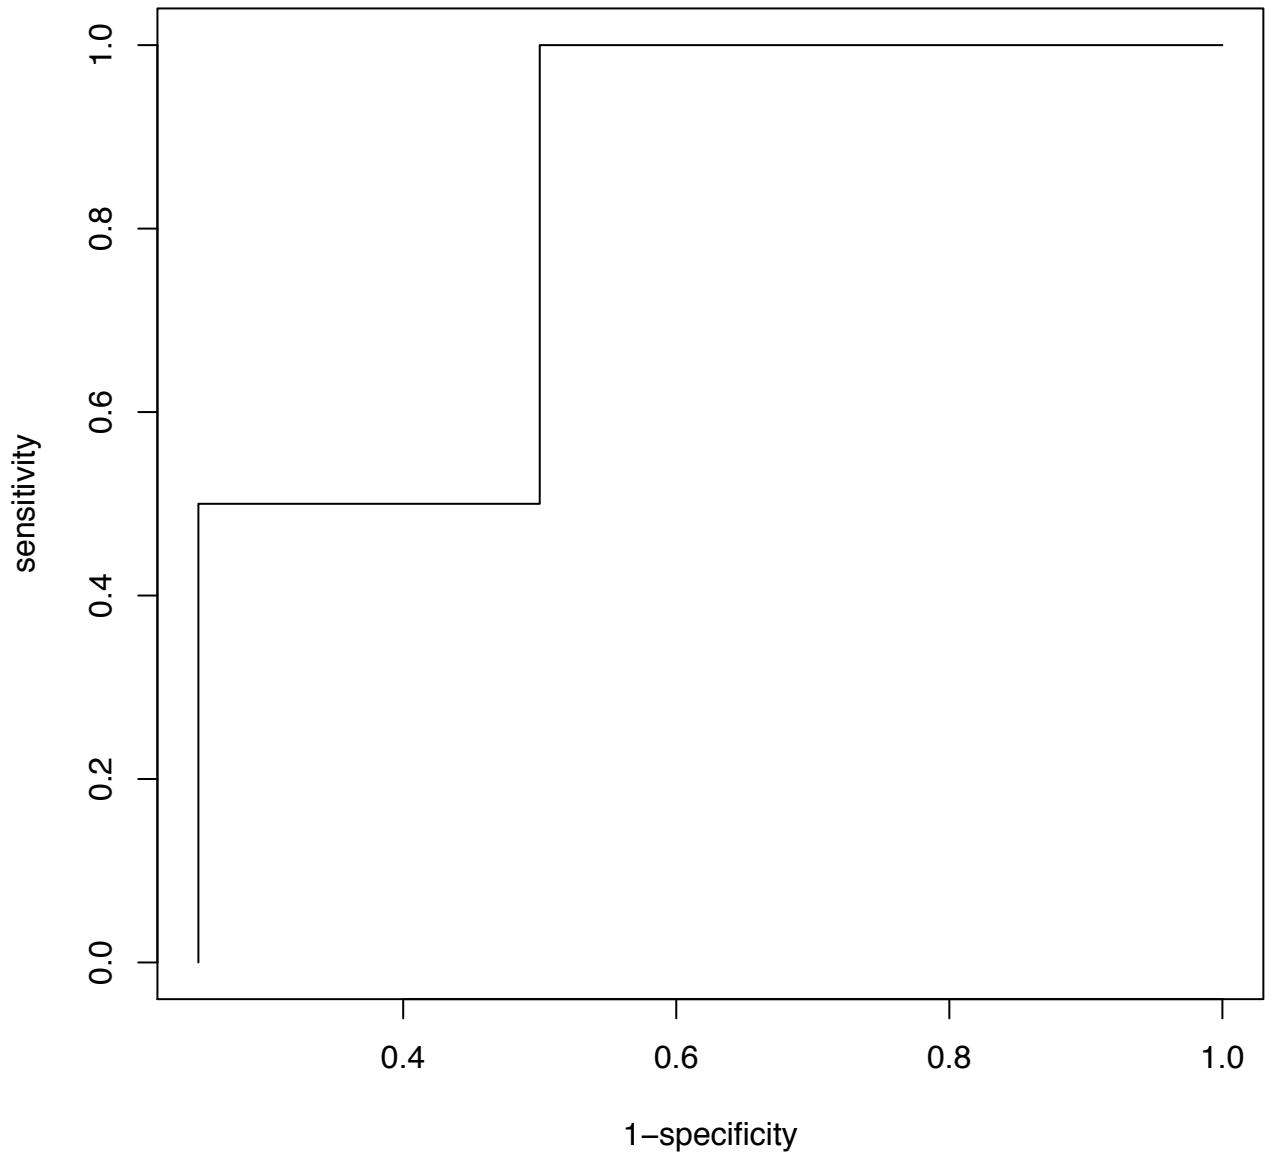

hu: Her2 vs. LumB . Number of peptides: 30

ROC area = 0.56 p-value = 0.44

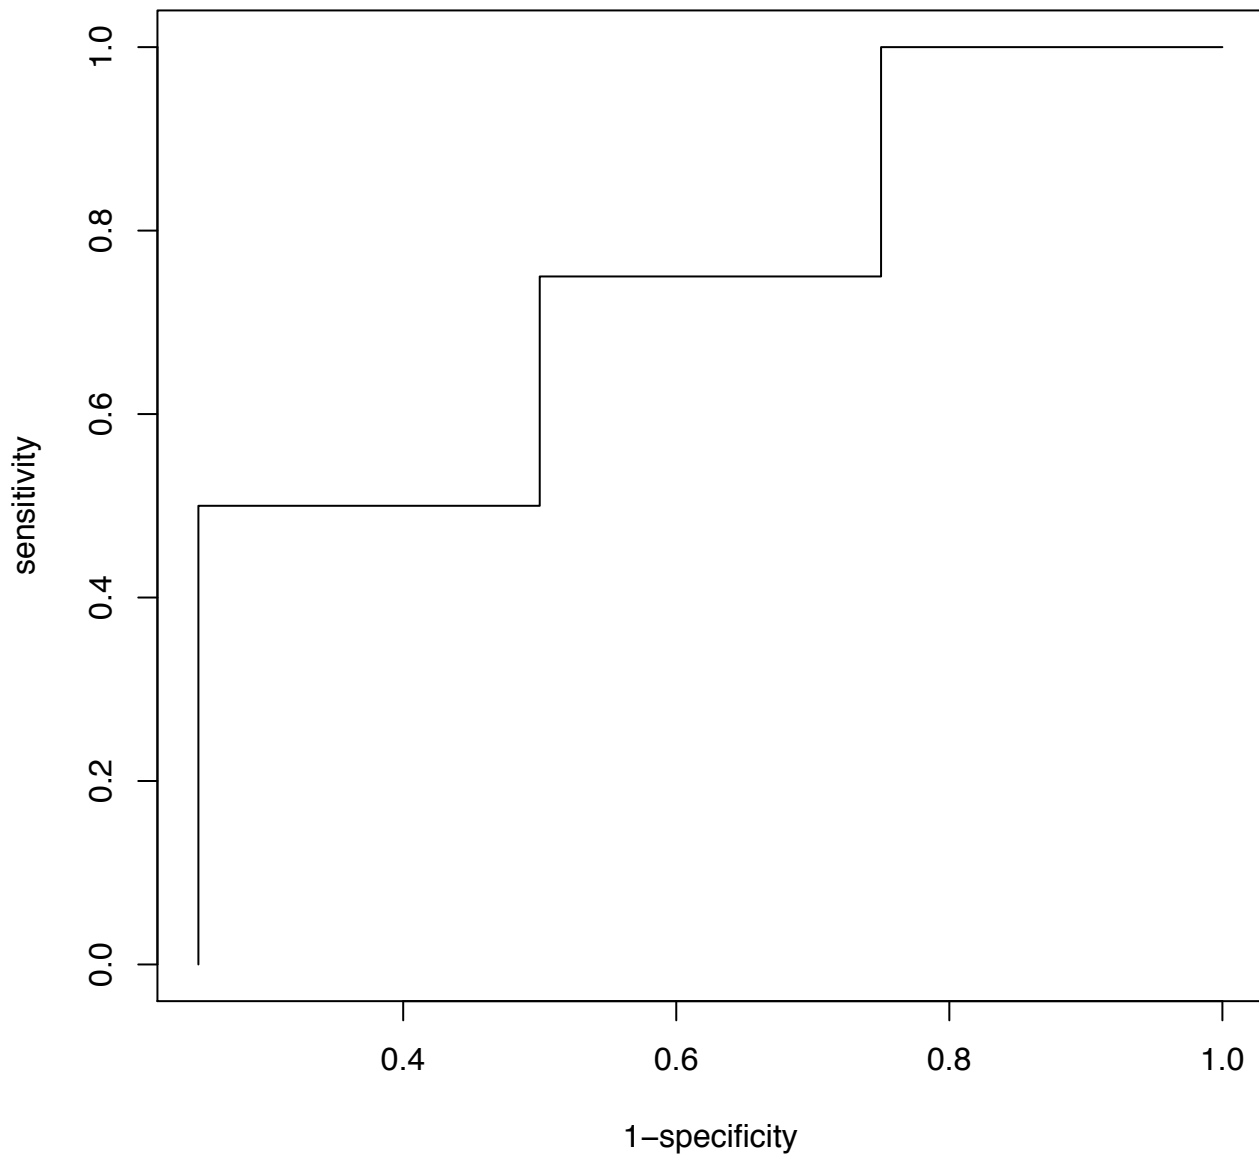

hu: Her2 vs. LumB . Number of peptides: 40

ROC area = 0.62 p-value = 0.34

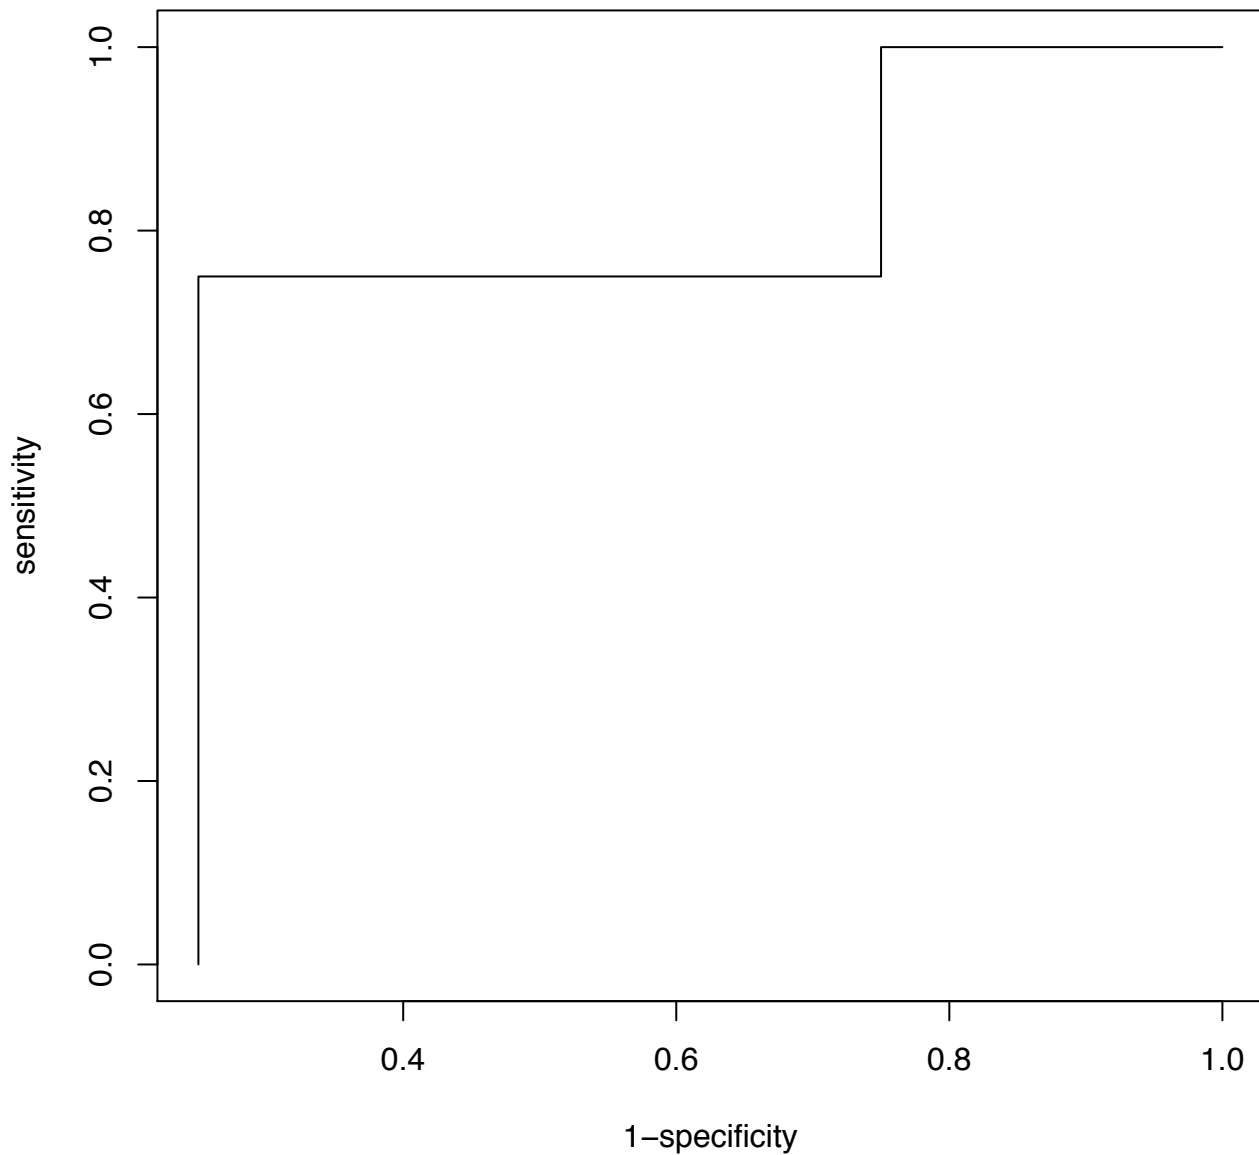



hu: Her2 vs. LumB . Number of peptides: 100

ROC area = 0.69 p-value = 0.24

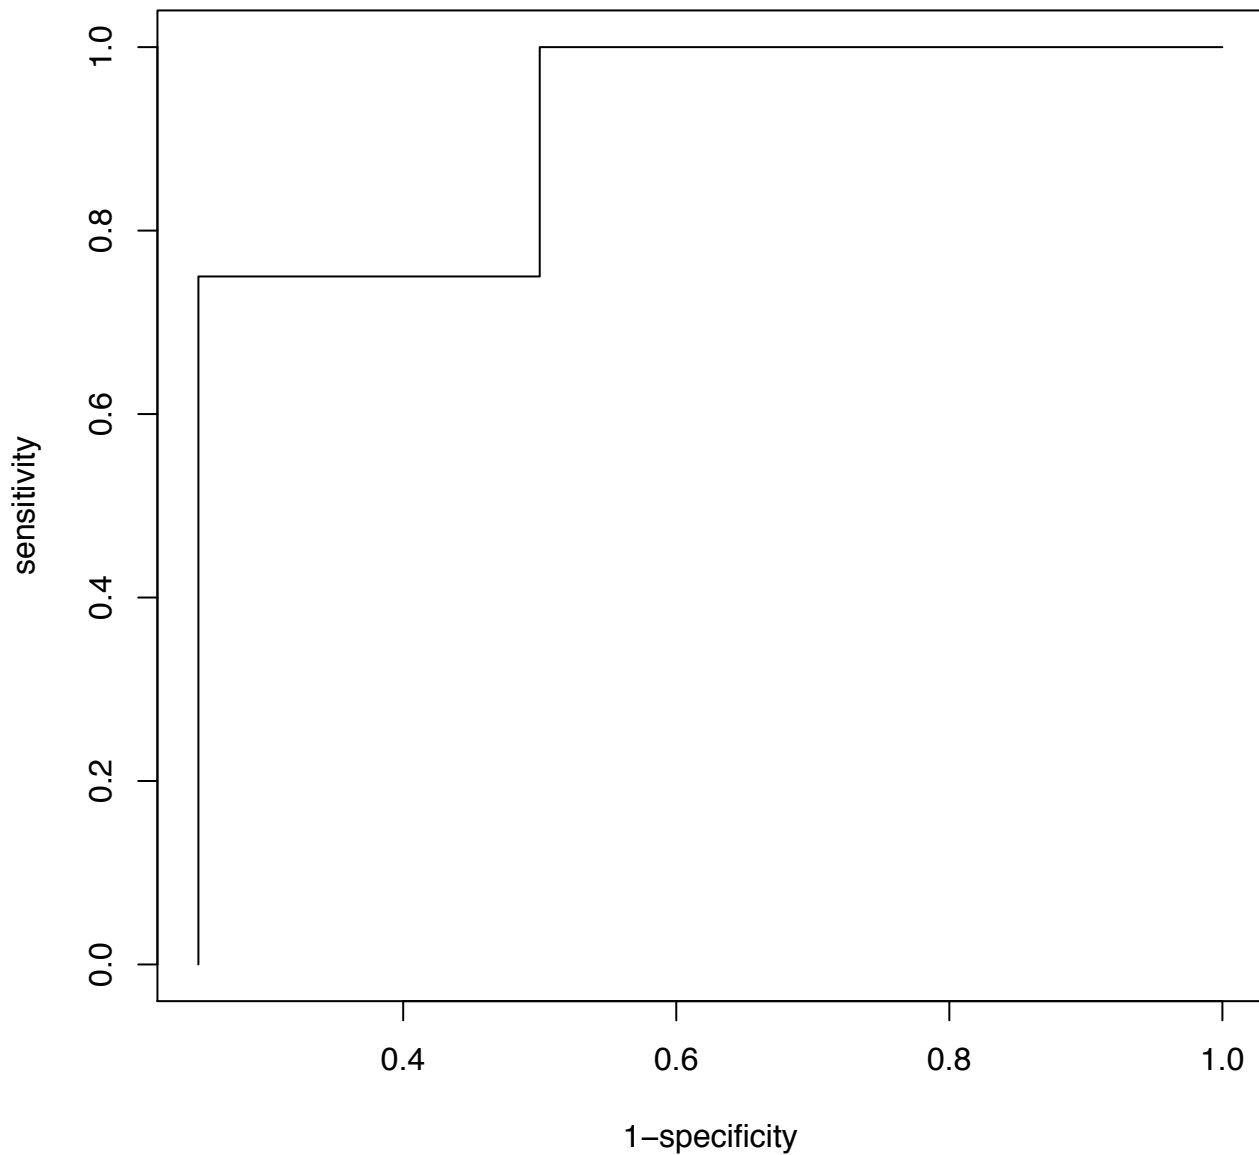

hu: Her2 vs. LumB . Number of peptides: NA

ROC area = 0.75 p-value = 0.17

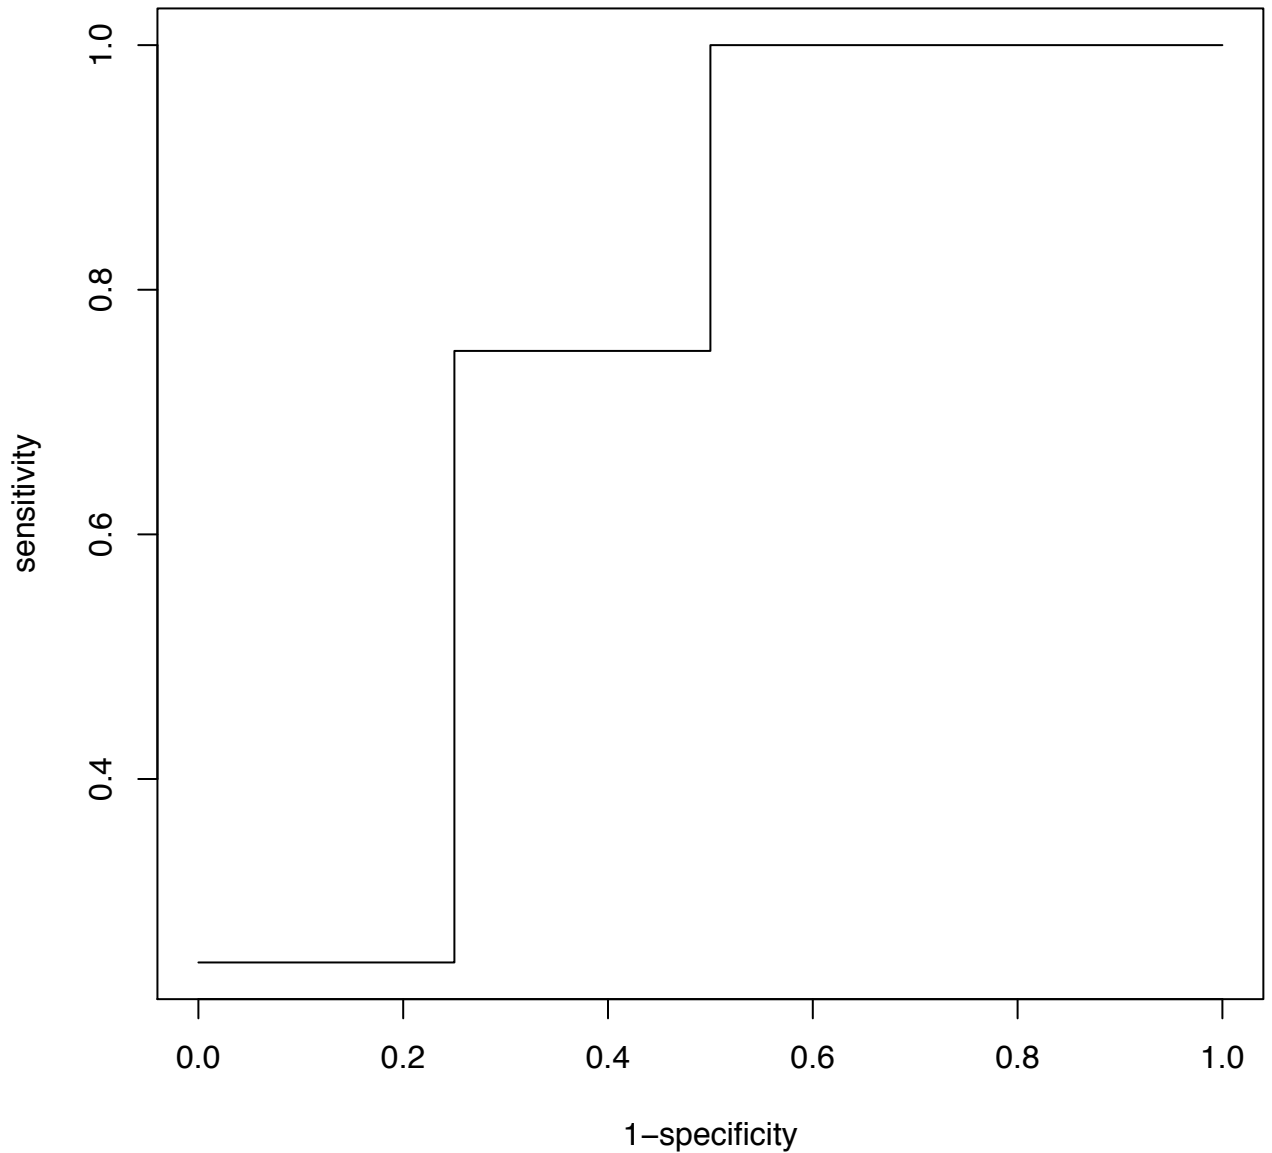

sorlie: Her2 vs. Normal . Number of peptides: 20

ROC area = 0.68 p-value = 0.21

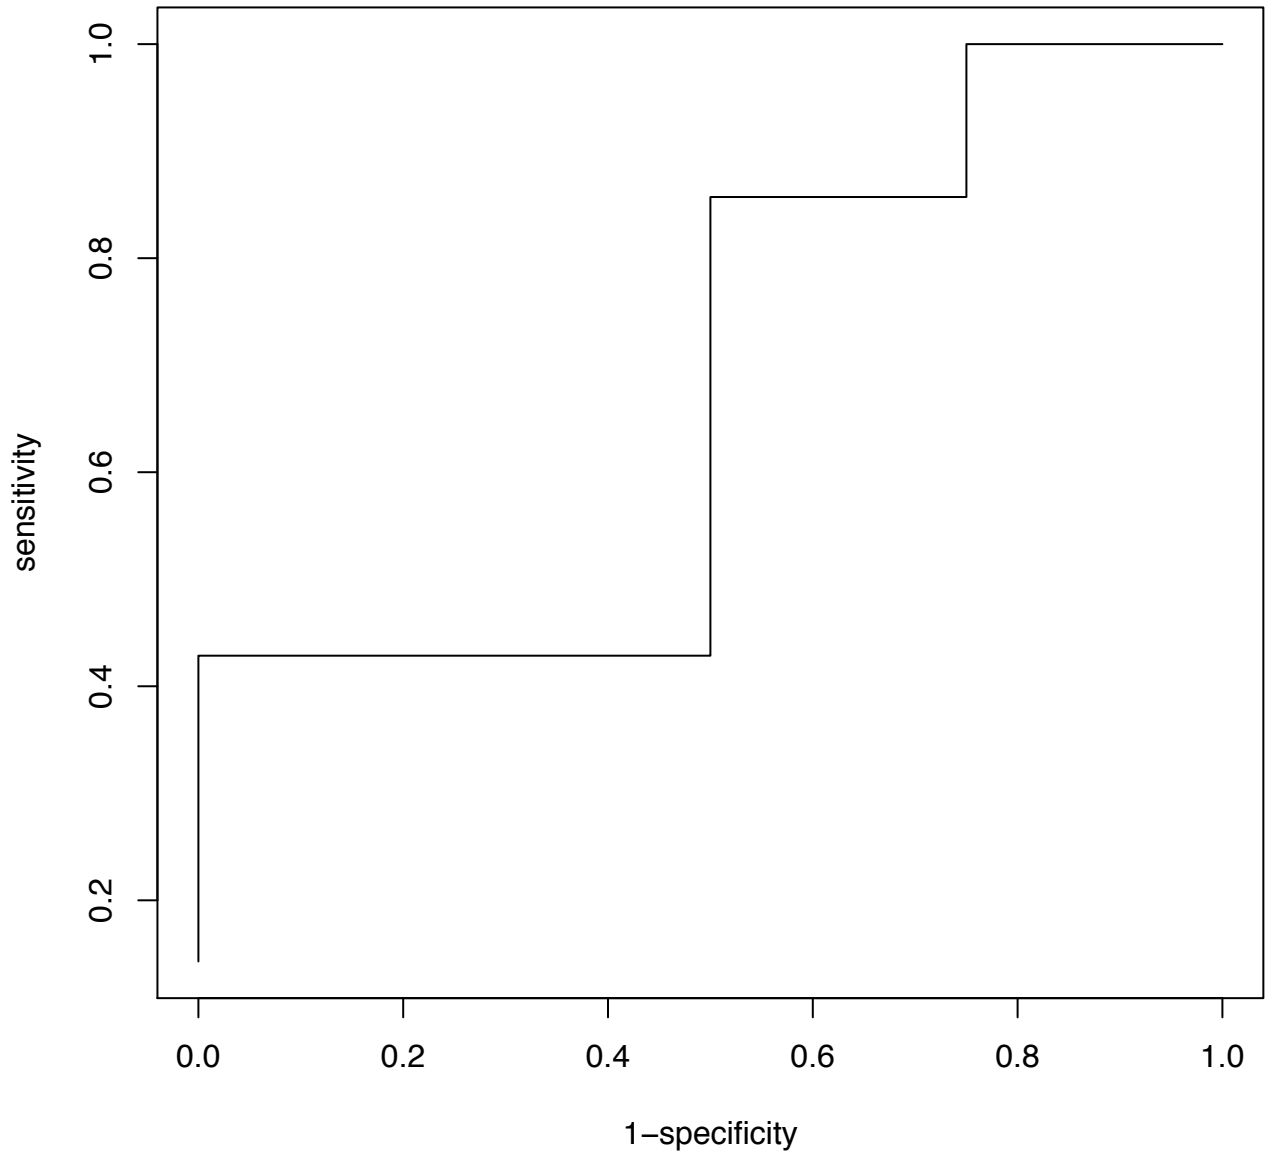

sorlie: Her2 vs. Normal . Number of peptides: 30

ROC area = 0.54 p-value = 0.46

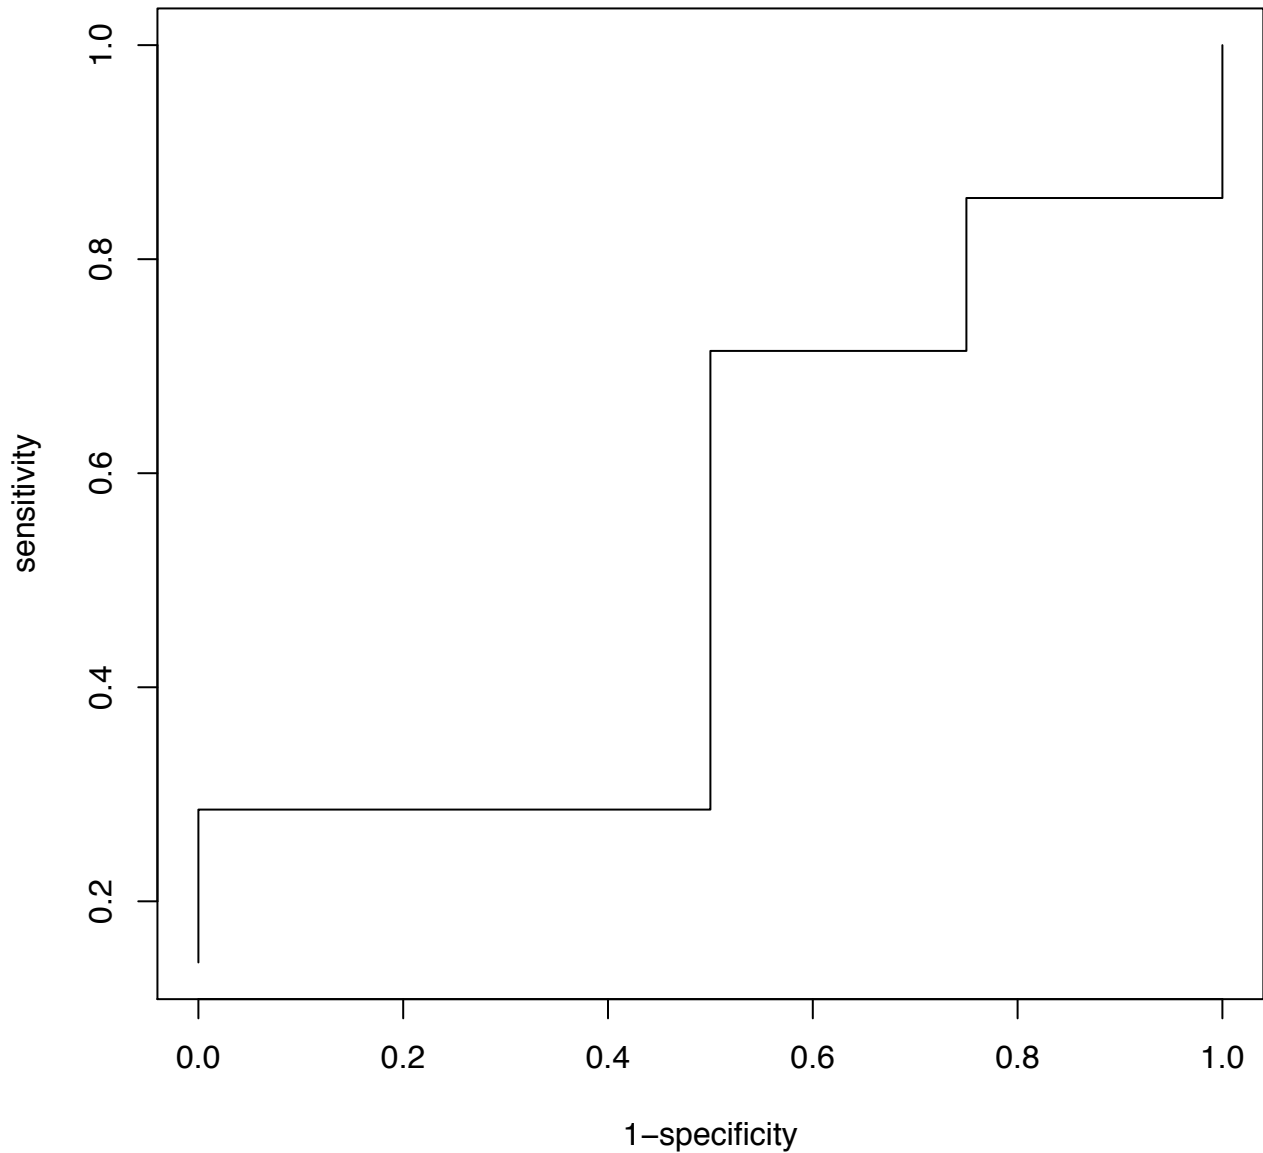

sorlie: Her2 vs. Normal . Number of peptides: 40

ROC area = 0.54 p-value = 0.46

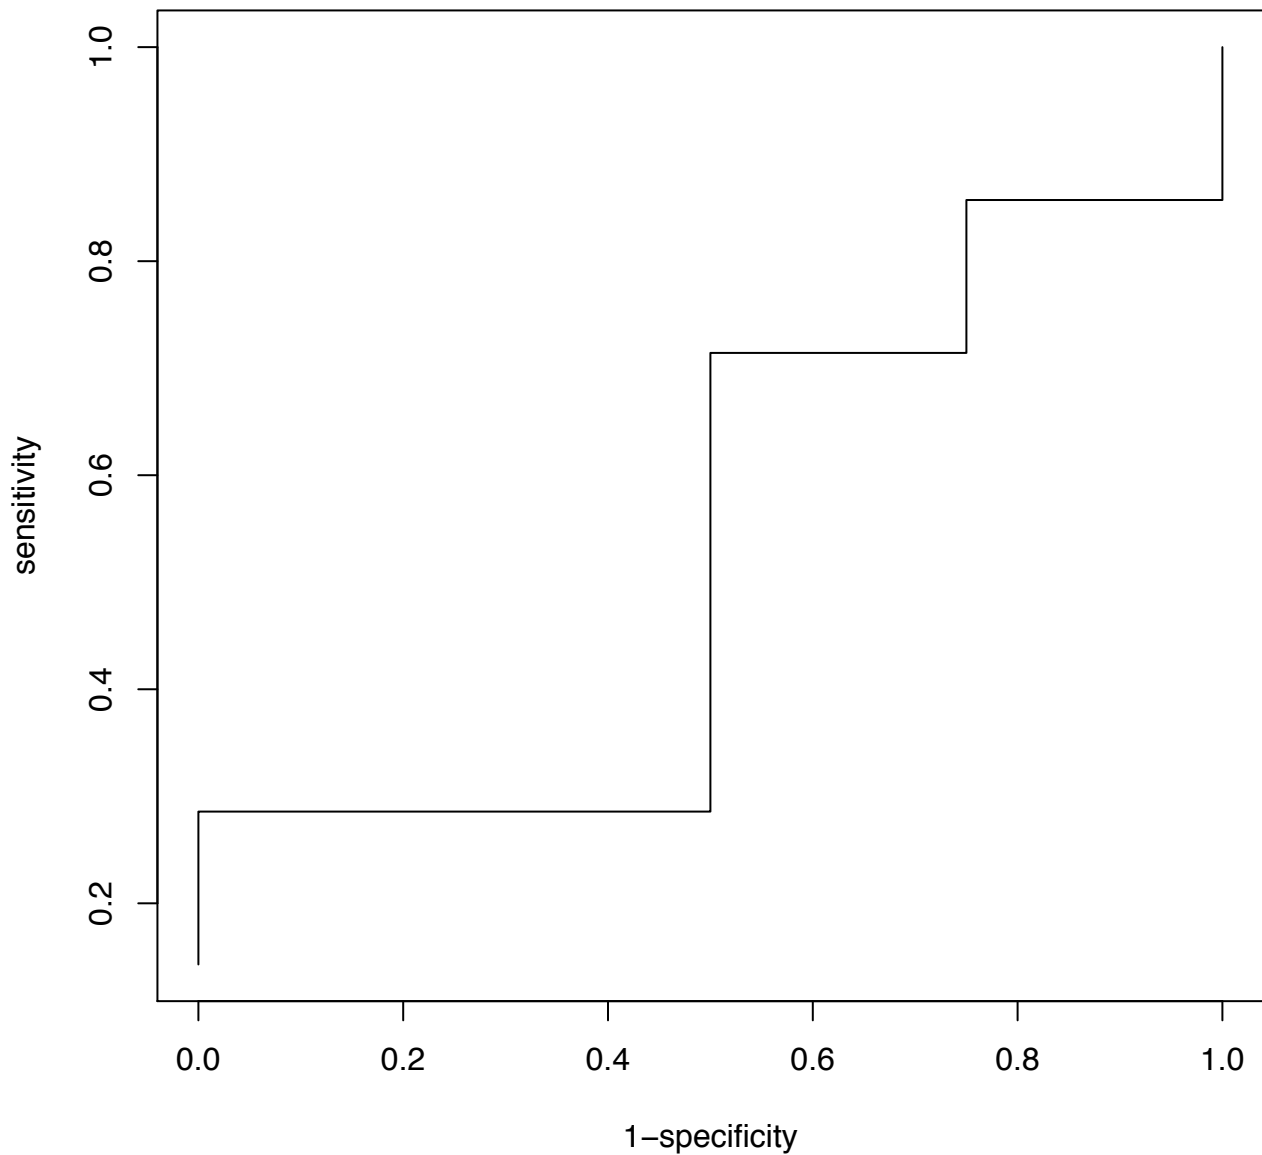

sorlie: Her2 vs. Normal . Number of peptides: 100

ROC area = 0.43 p-value = 0.68

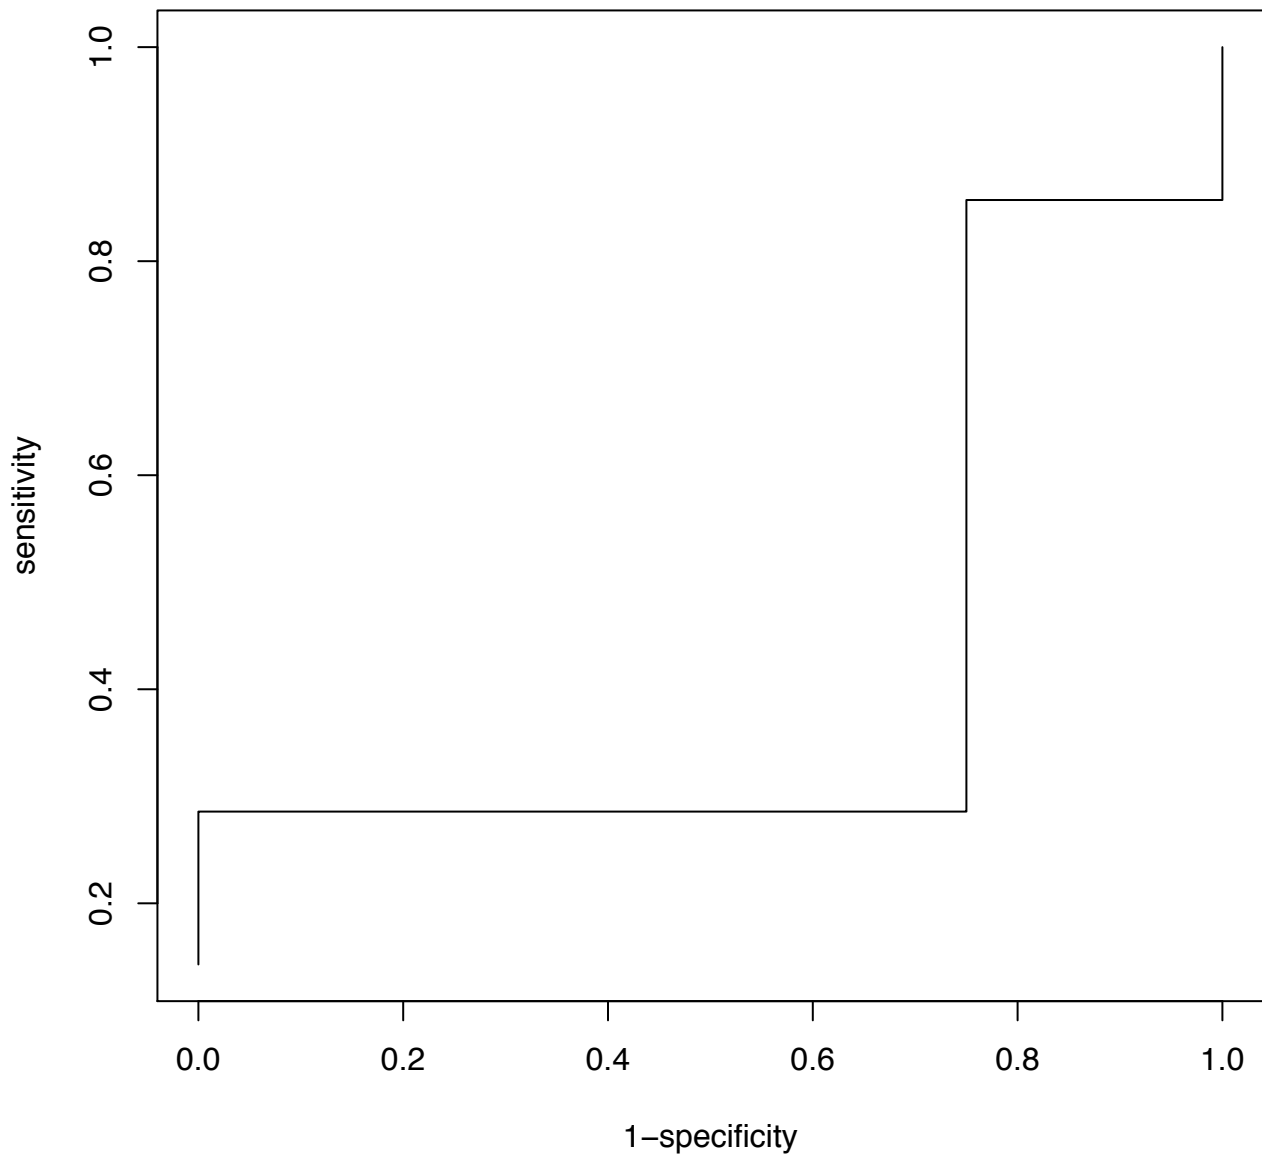

sorlie: Her2 vs. Normal . Number of peptides: NA

ROC area = 0.46 p-value = 0.61

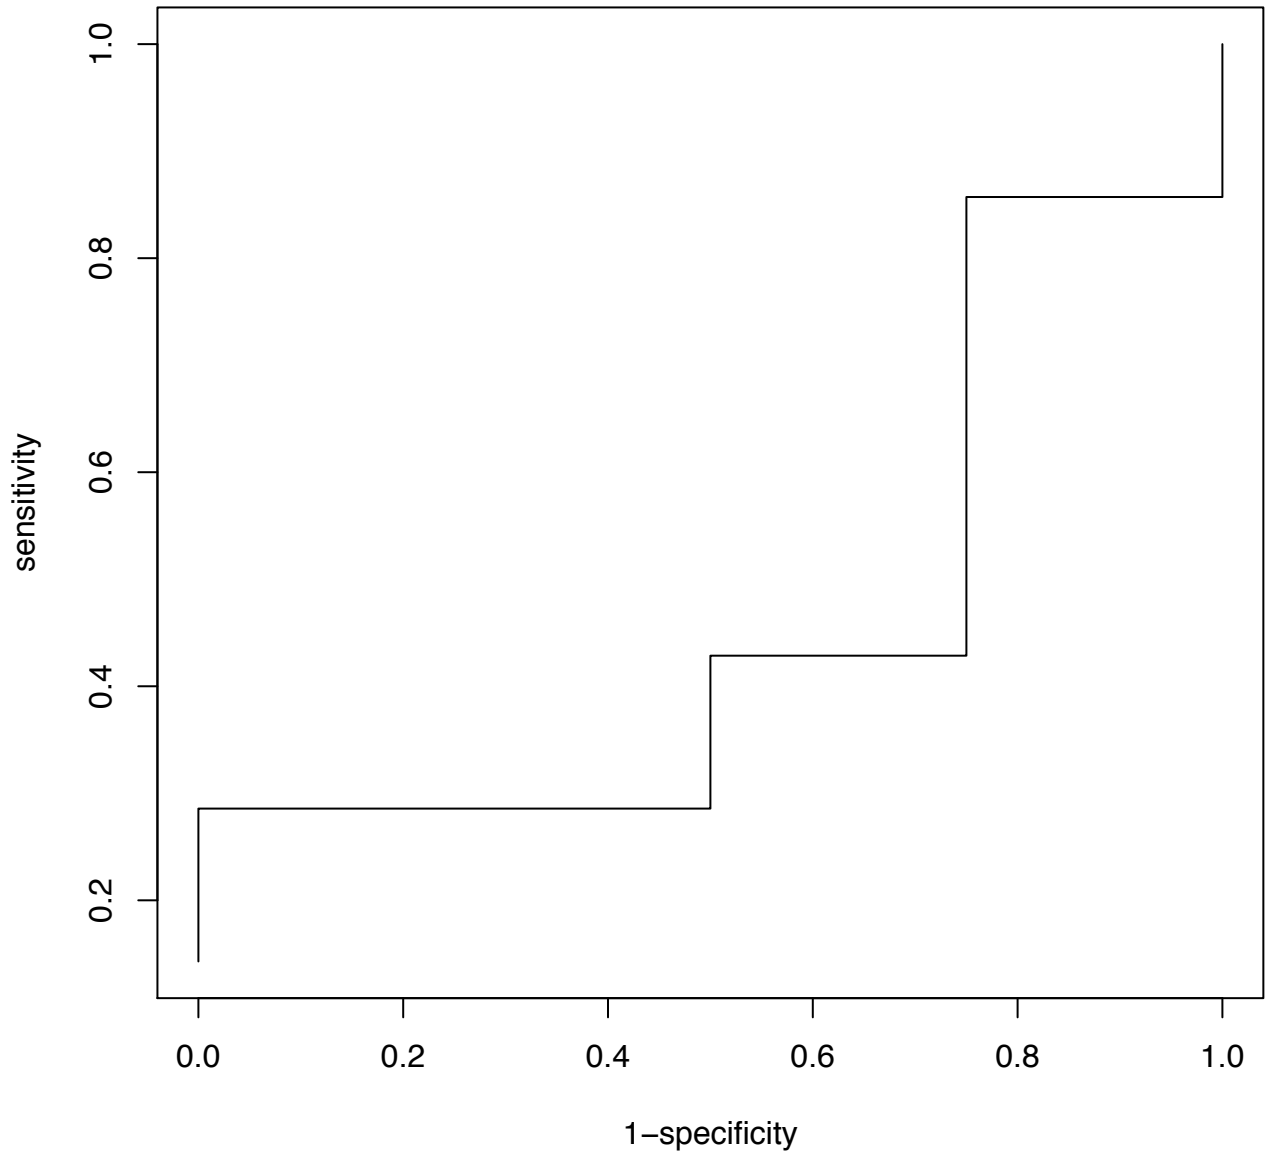

pam50: Her2 vs. Normal . Number of peptides: 20

ROC area = 0.83 p-value = 0.032

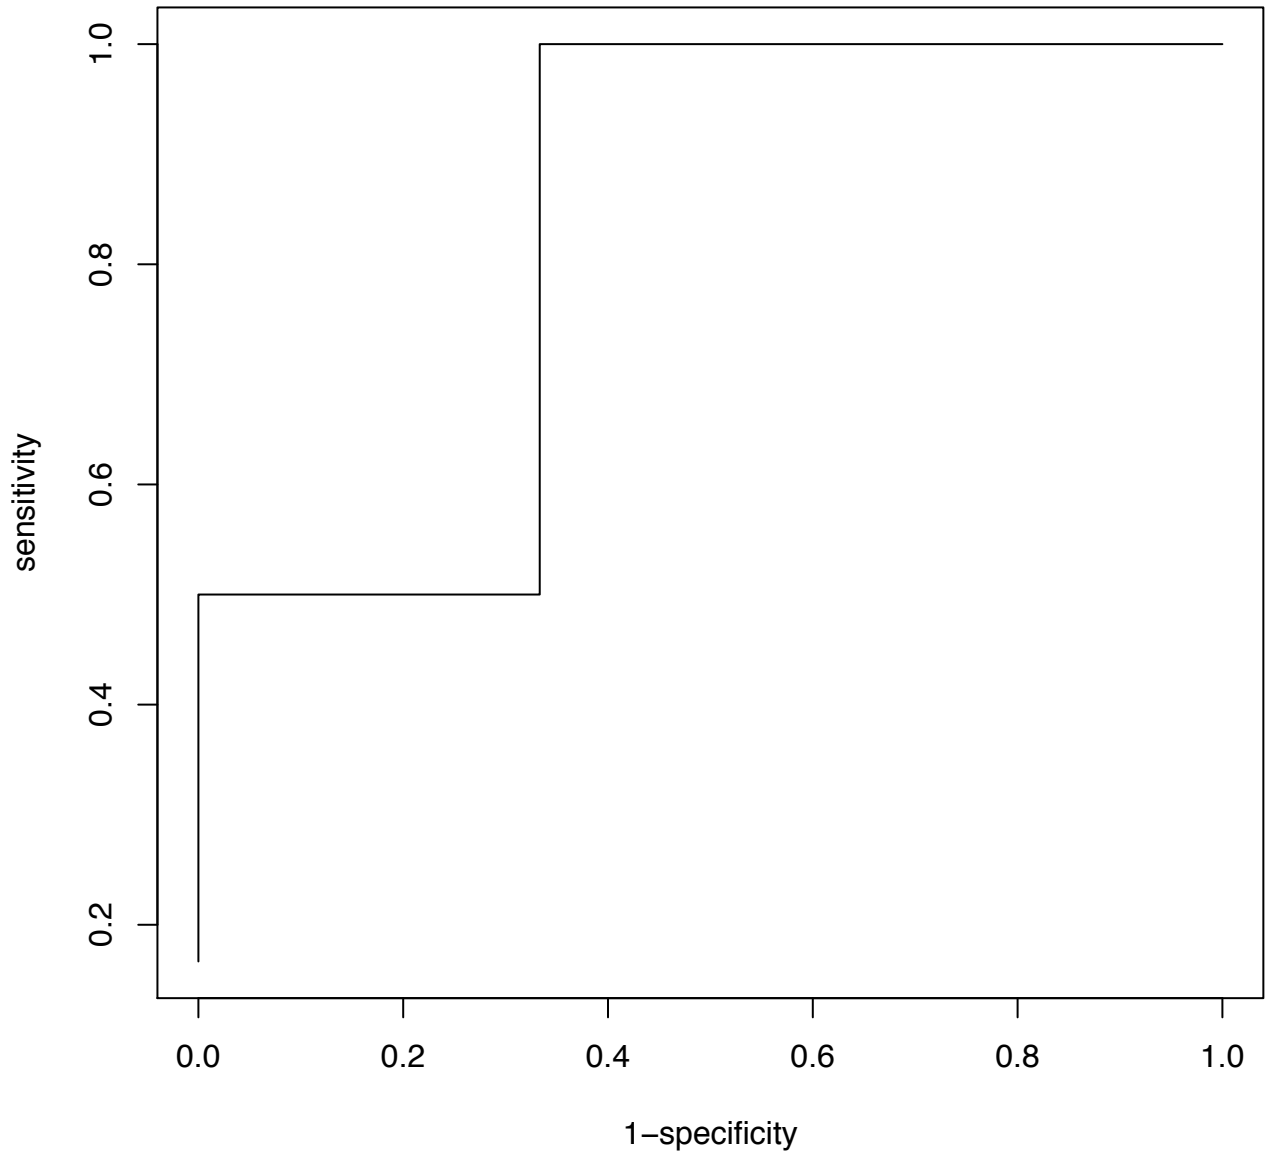



pam50: Her2 vs. Normal . Number of peptides: 30

ROC area = 0.78 p-value = 0.066

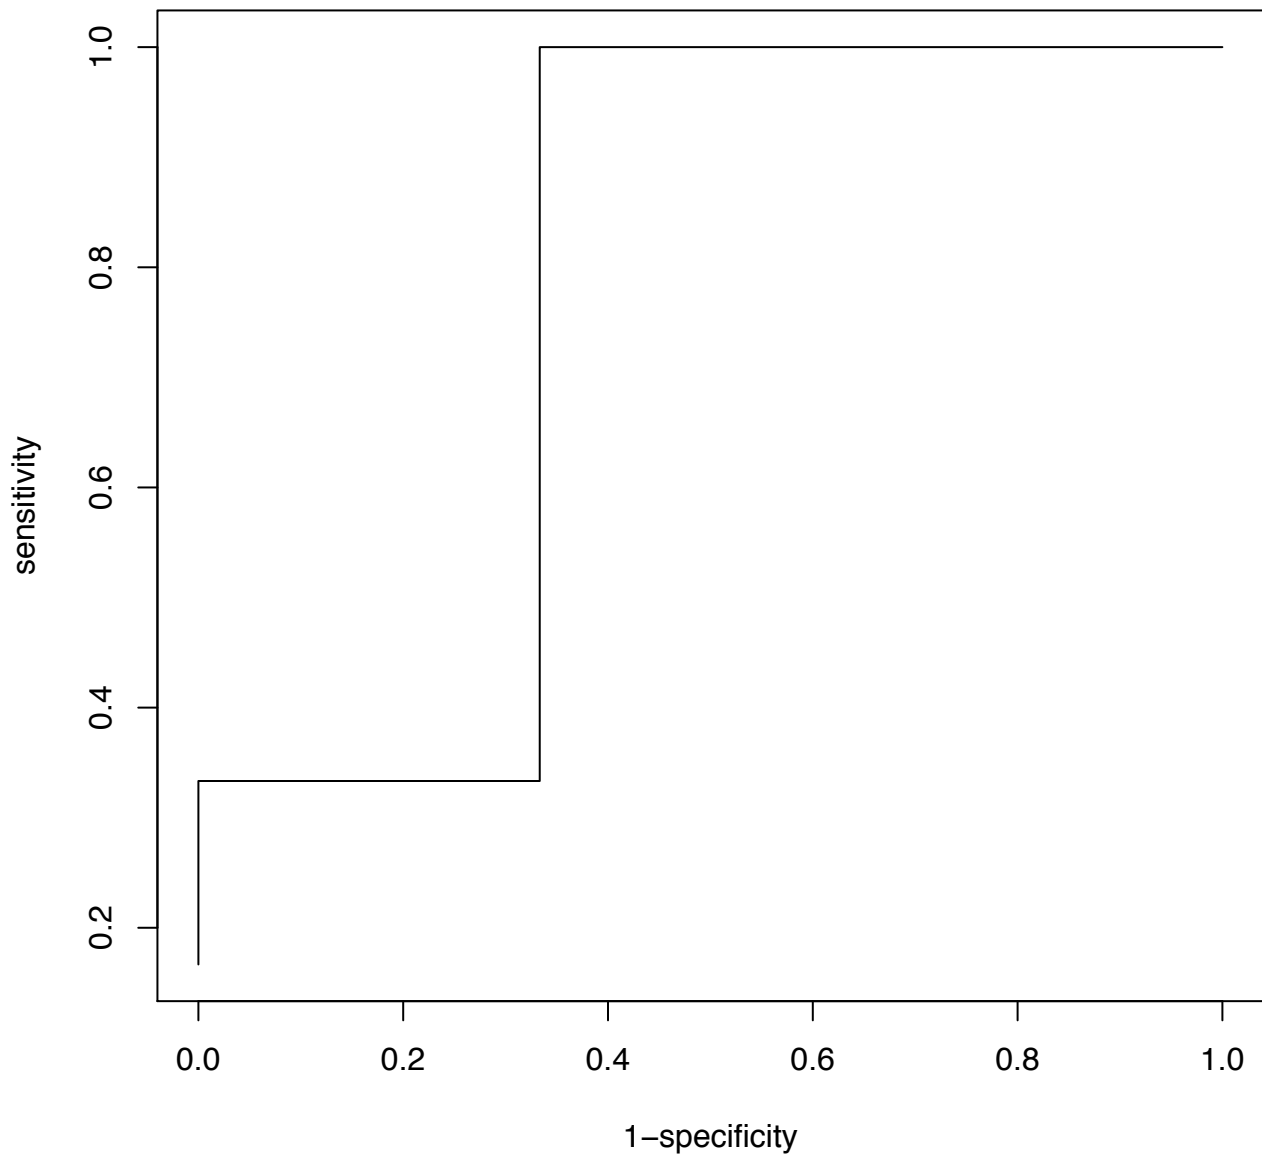

pam50: Her2 vs. Normal . Number of peptides: 40

ROC area = 0.89 p-value = 0.013

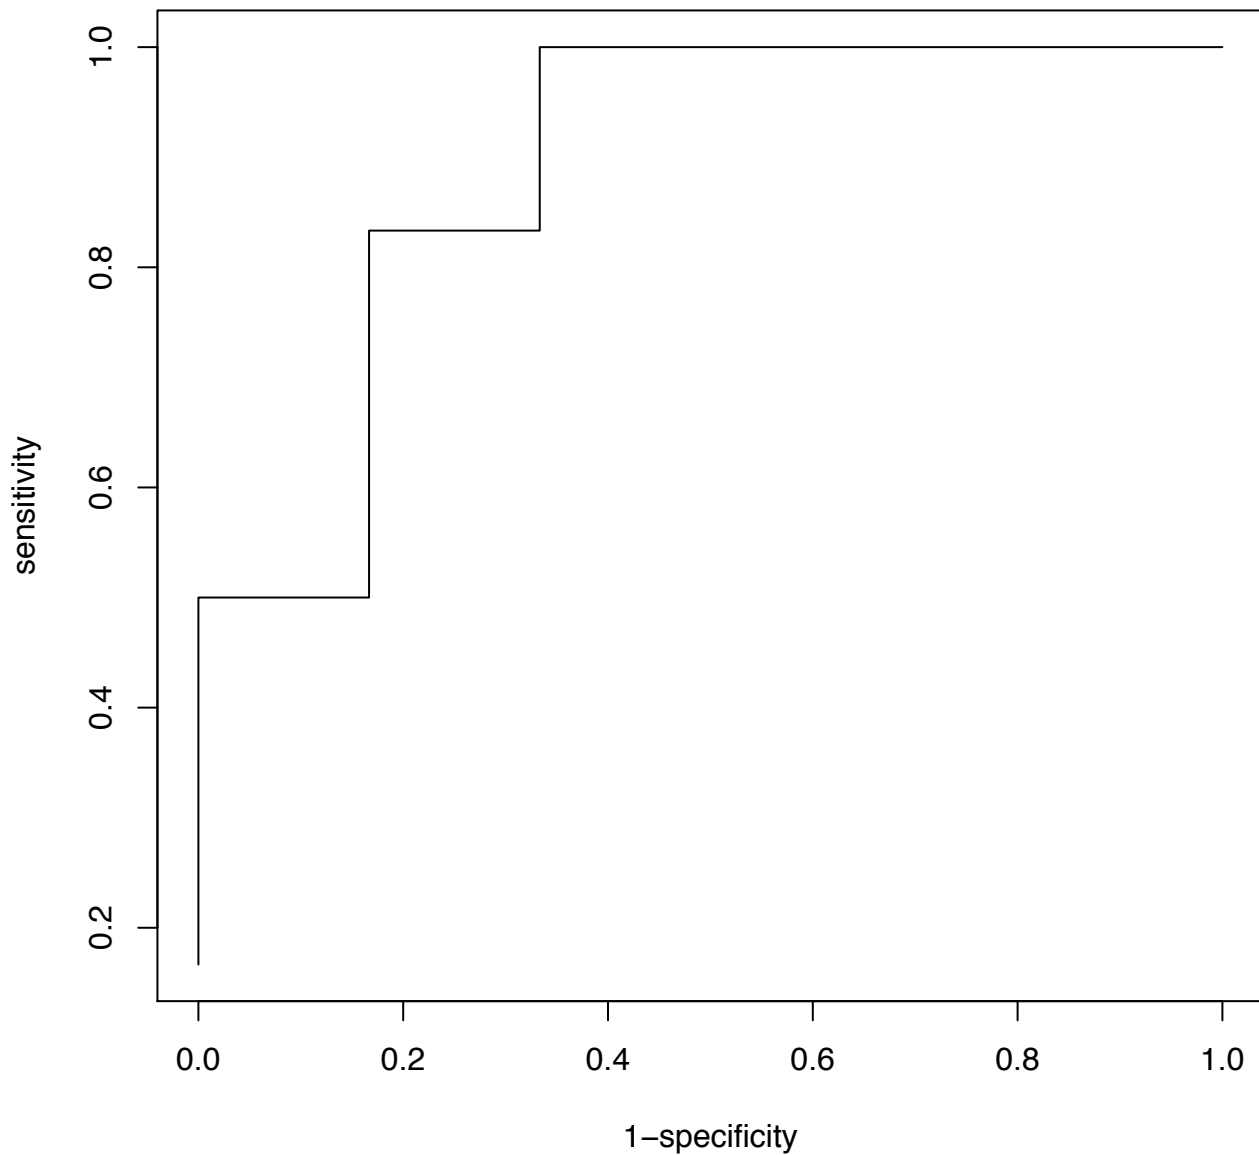

pam50: Her2 vs. Normal . Number of peptides: 100

ROC area = 0.67 p-value = 0.2

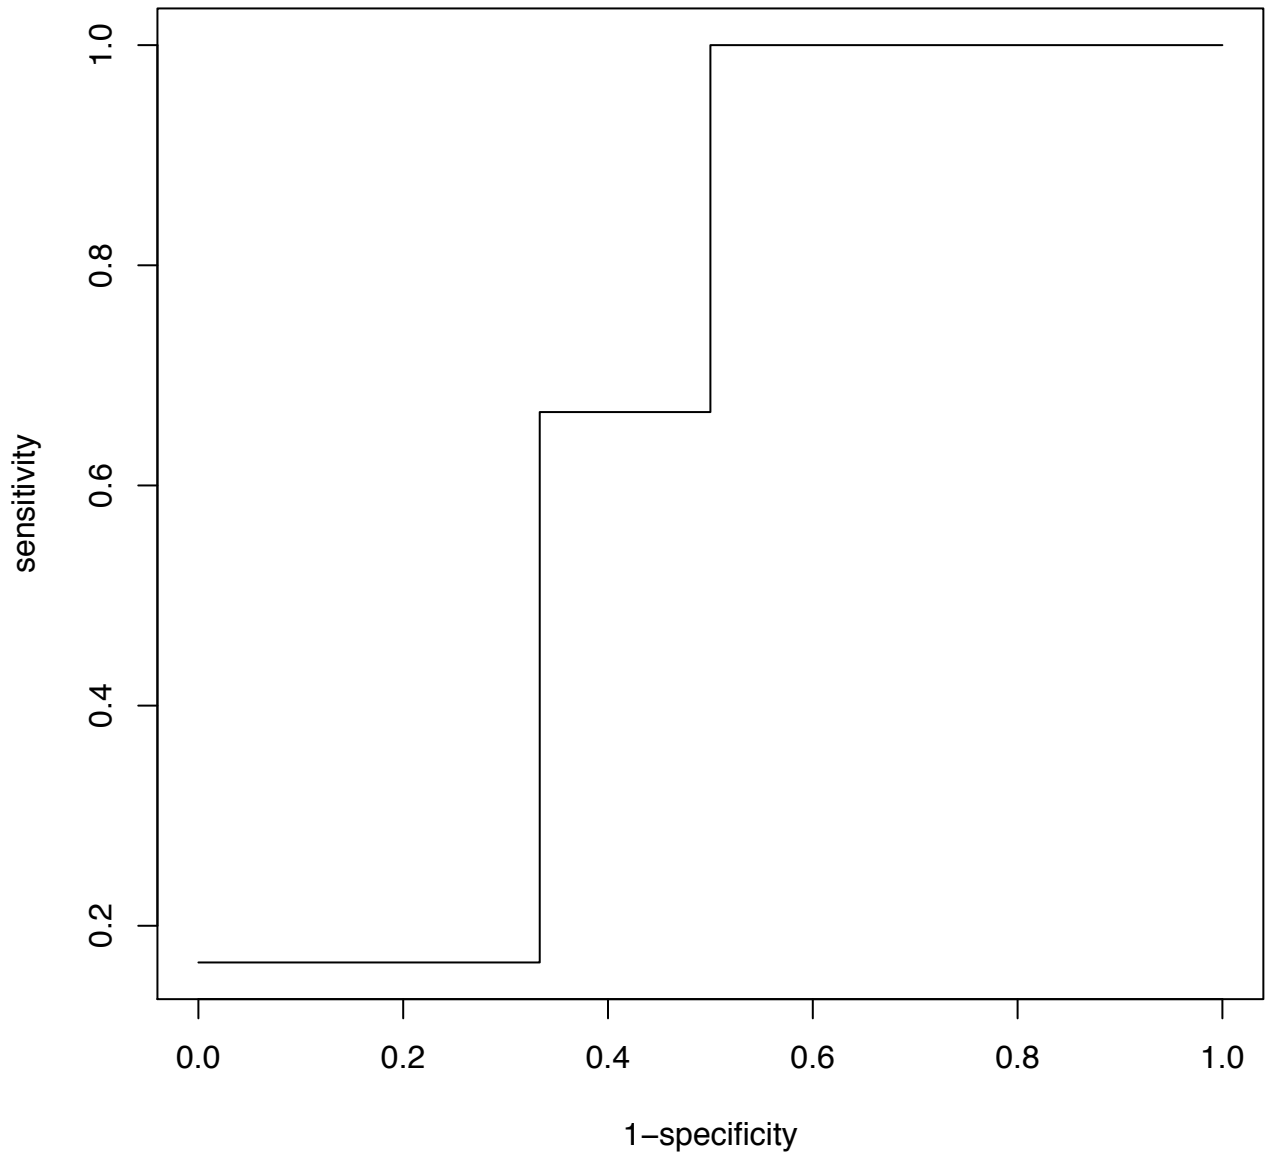

pam50: Her2 vs. Normal . Number of peptides: NA  
ROC area = 0.58 p-value = 0.35

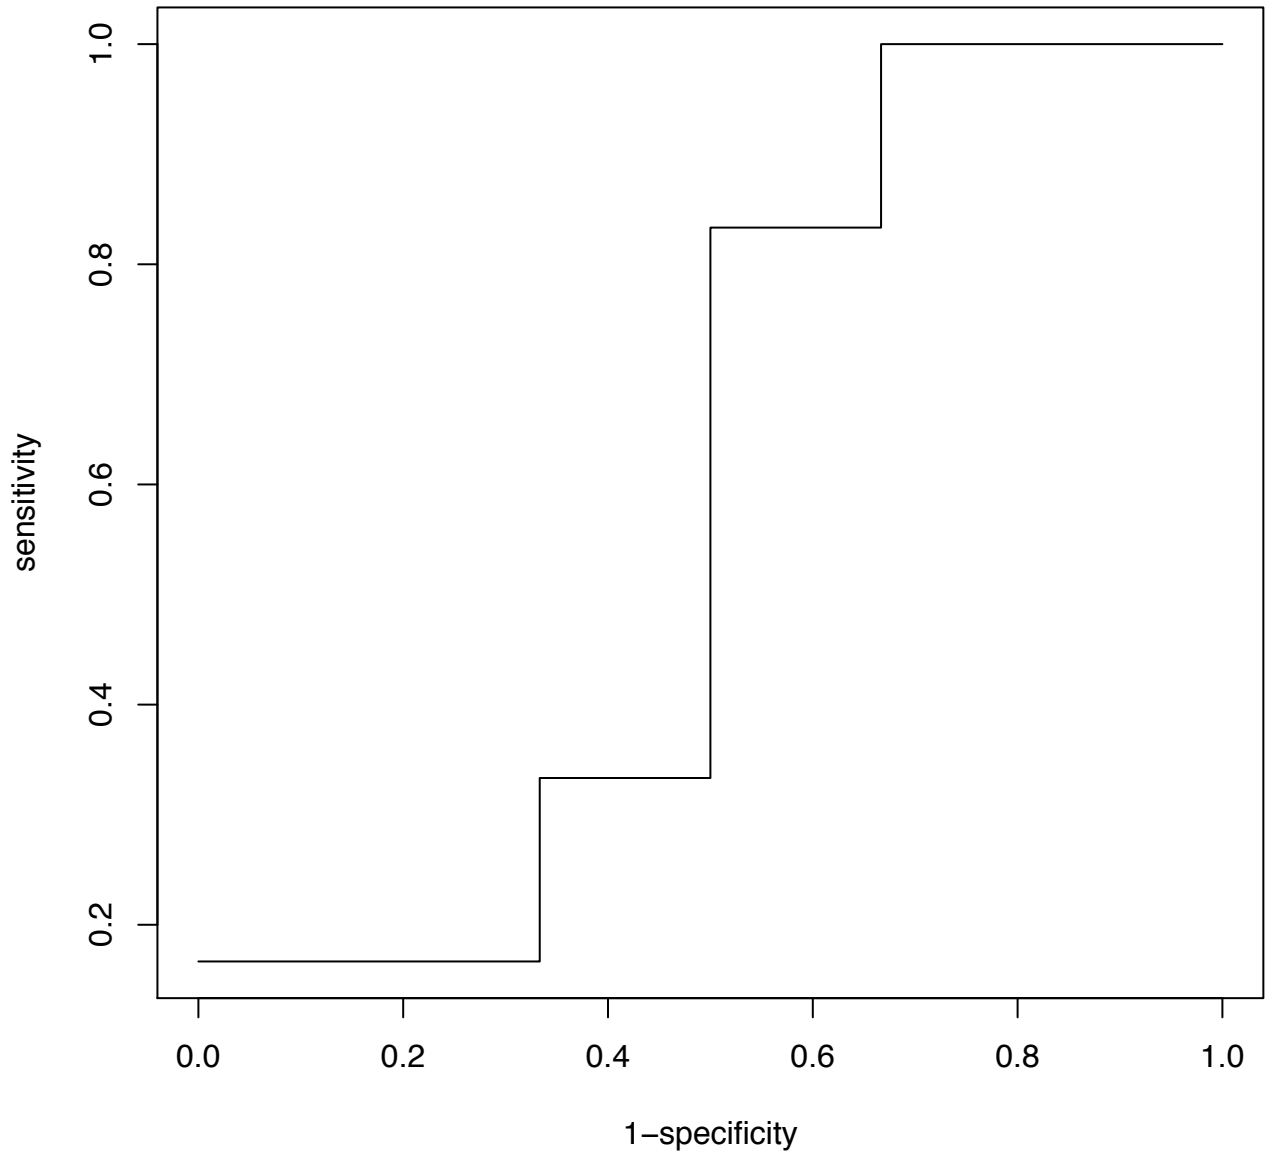

hu: Her2 vs. Normal . Number of peptides: 20

ROC area = 0.44 p-value = 0.66

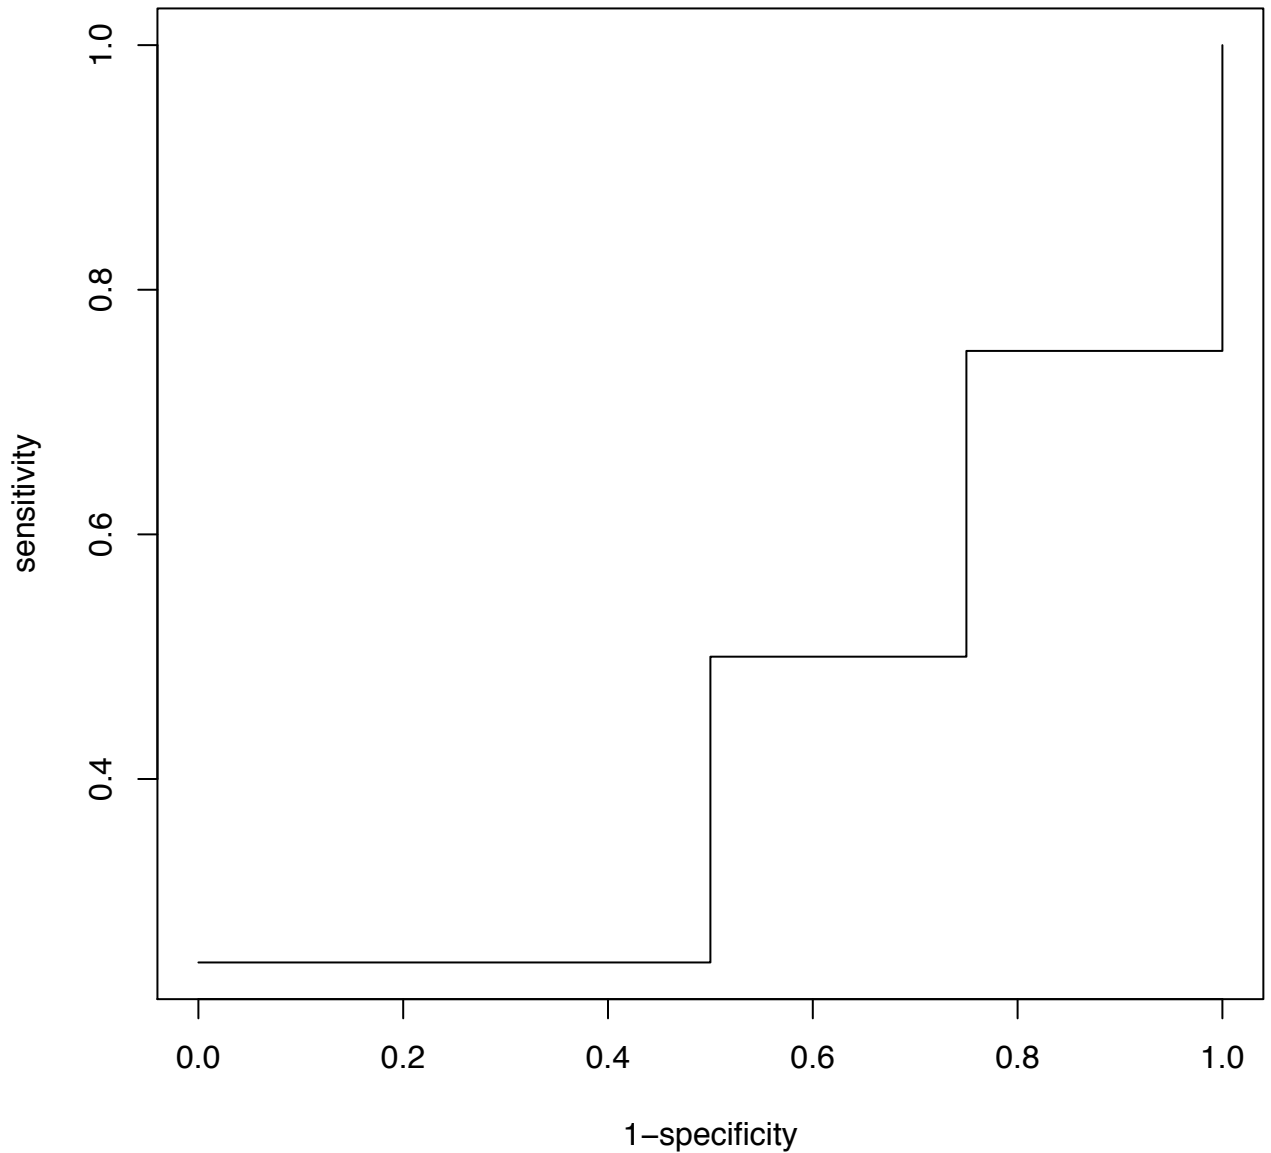

hu: Her2 vs. Normal . Number of peptides: 30

ROC area = 0.38 p-value = 0.76

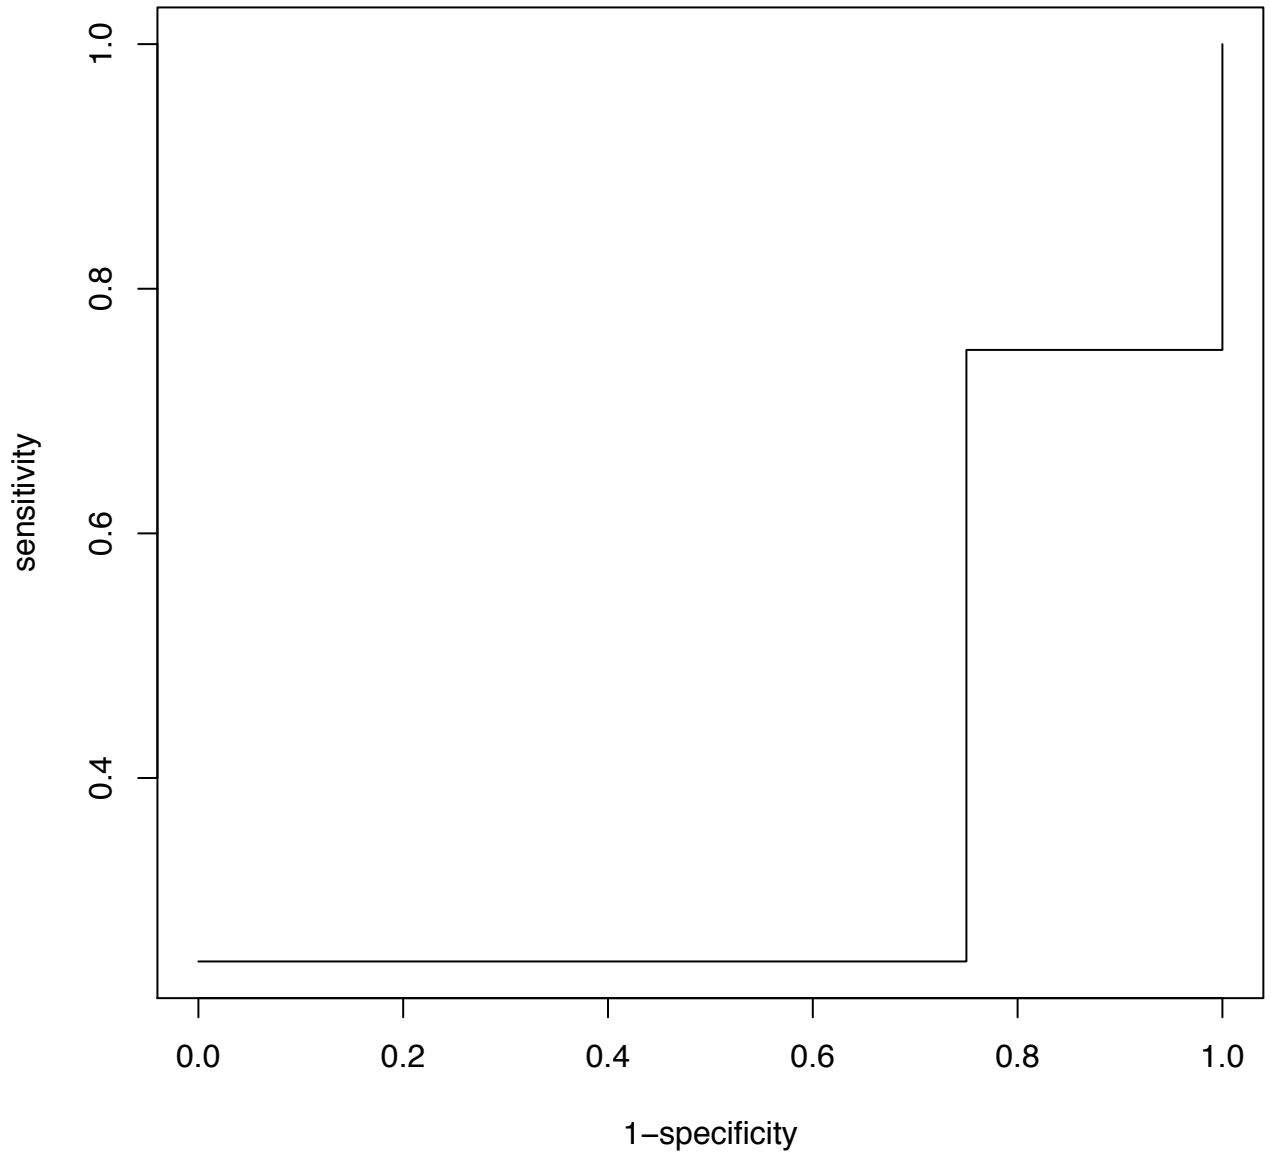

hu: Her2 vs. Normal . Number of peptides: 40

ROC area = 0.31 p-value = 0.83

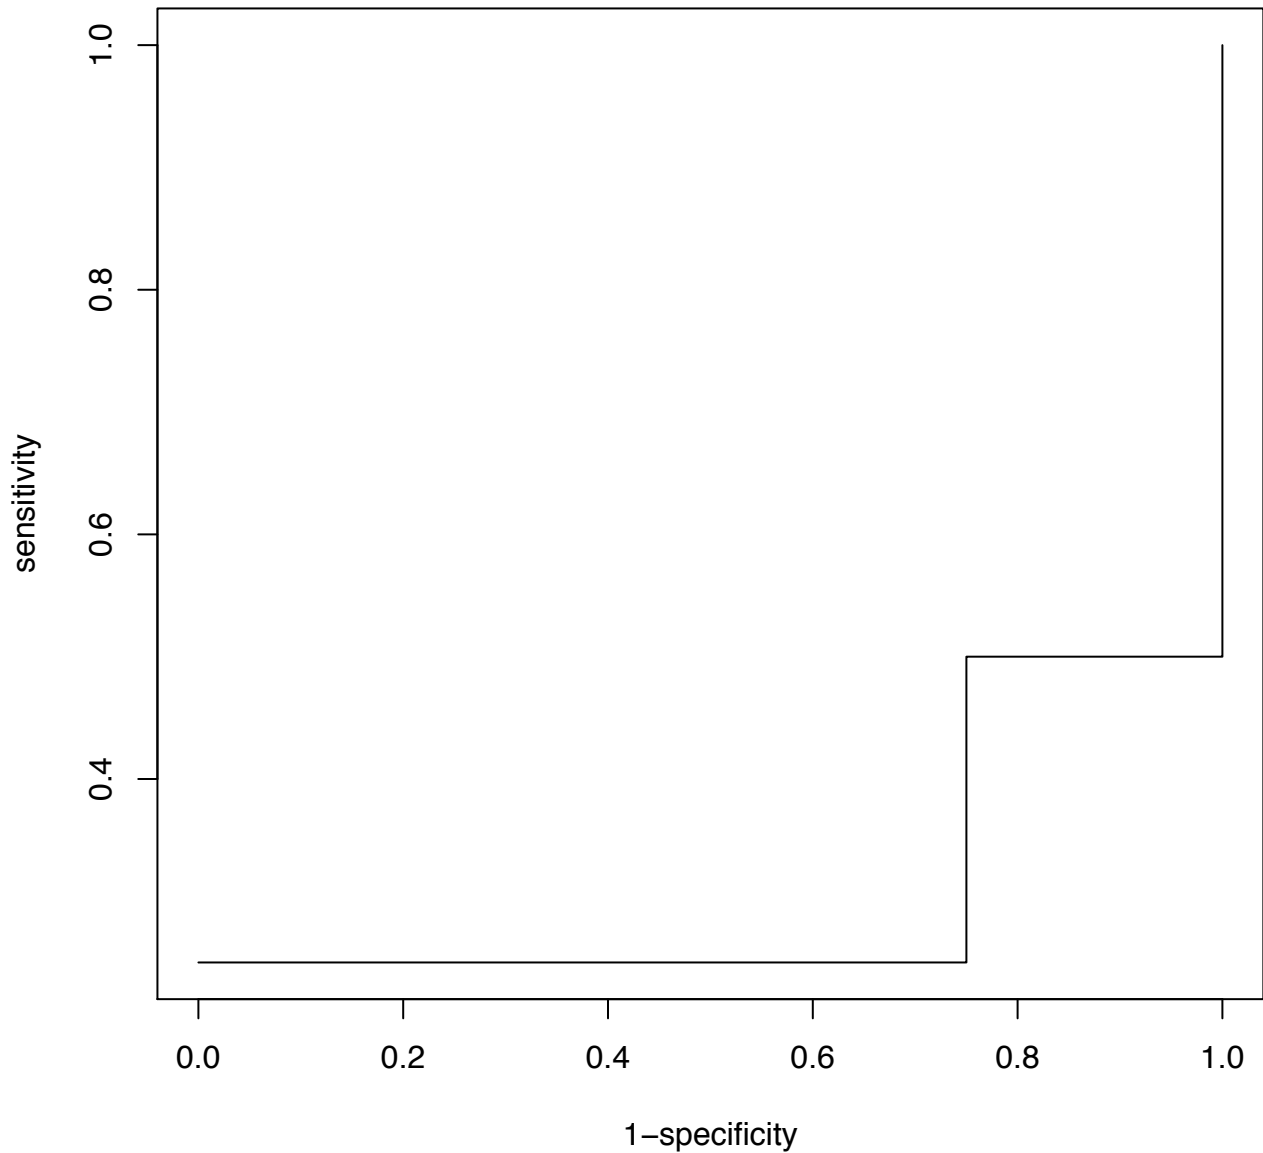

hu: Her2 vs. Normal . Number of peptides: 100

ROC area = 0.31 p-value = 0.83

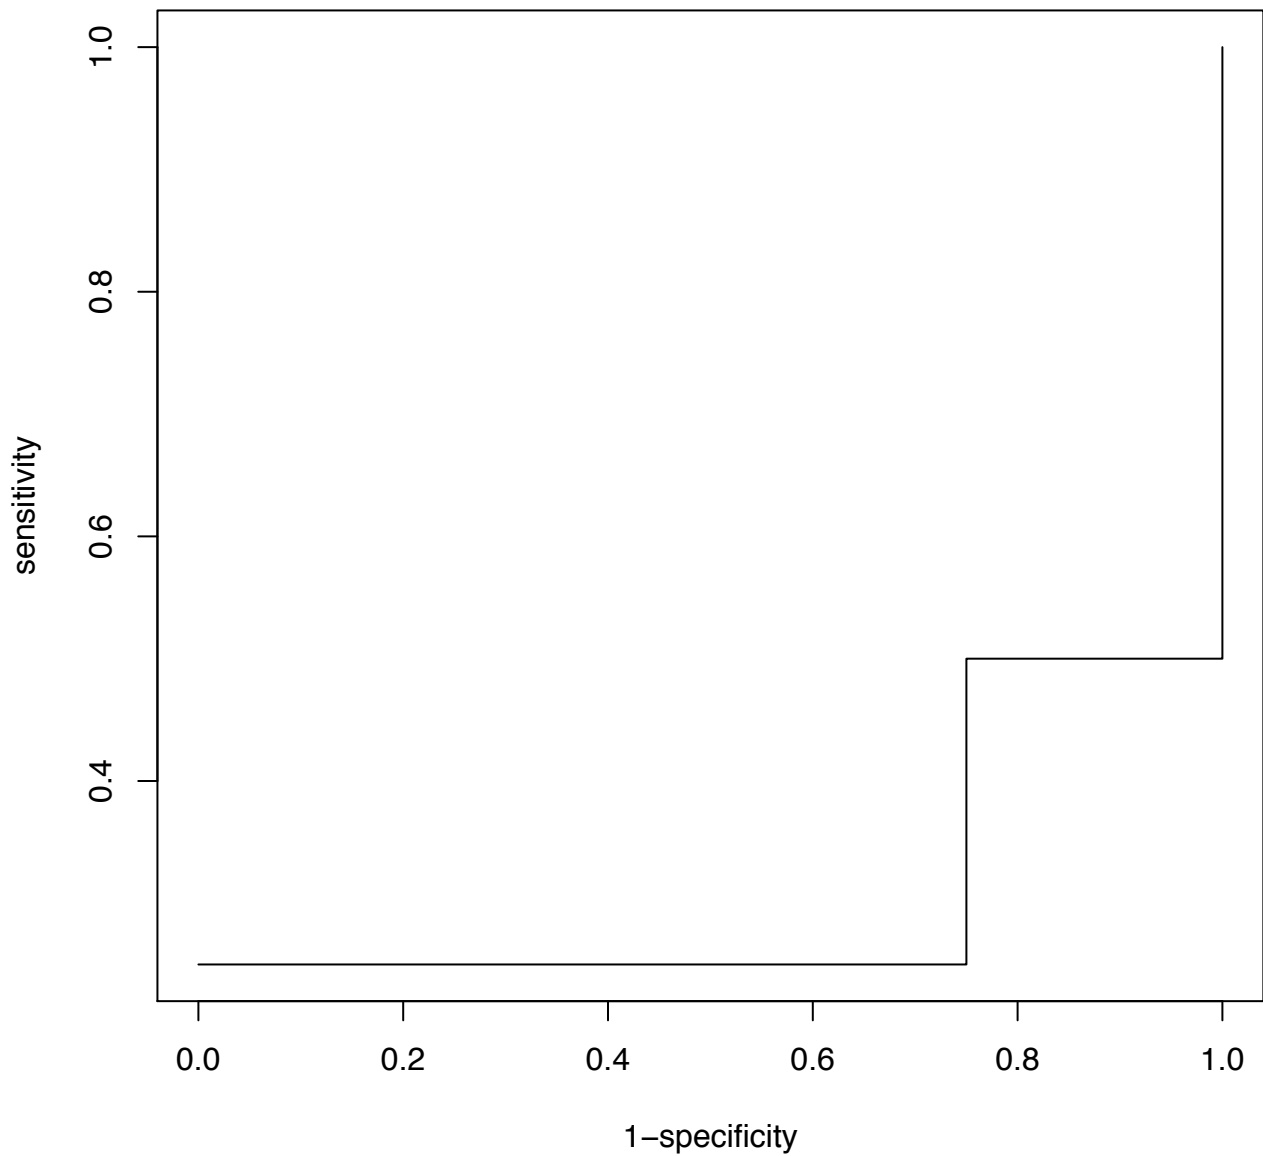



hu: Her2 vs. Normal . Number of peptides: NA  
ROC area = 0.25 p-value = 0.9

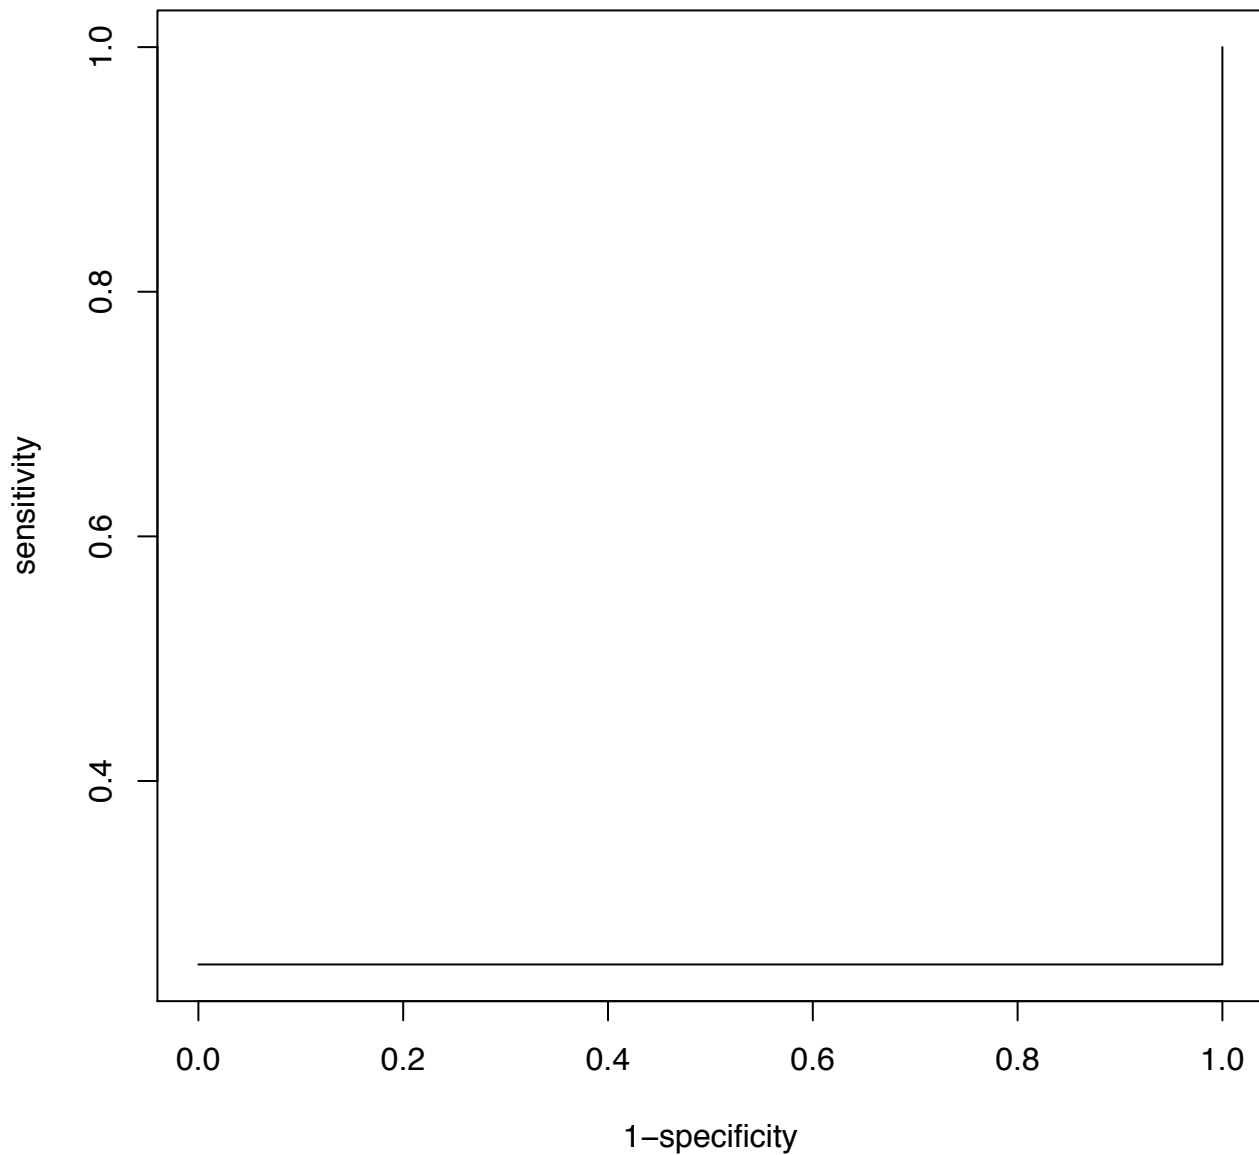

sorlie: LumA vs. LumB . Number of peptides: 20  
ROC area = 0.7 p-value = 0.14

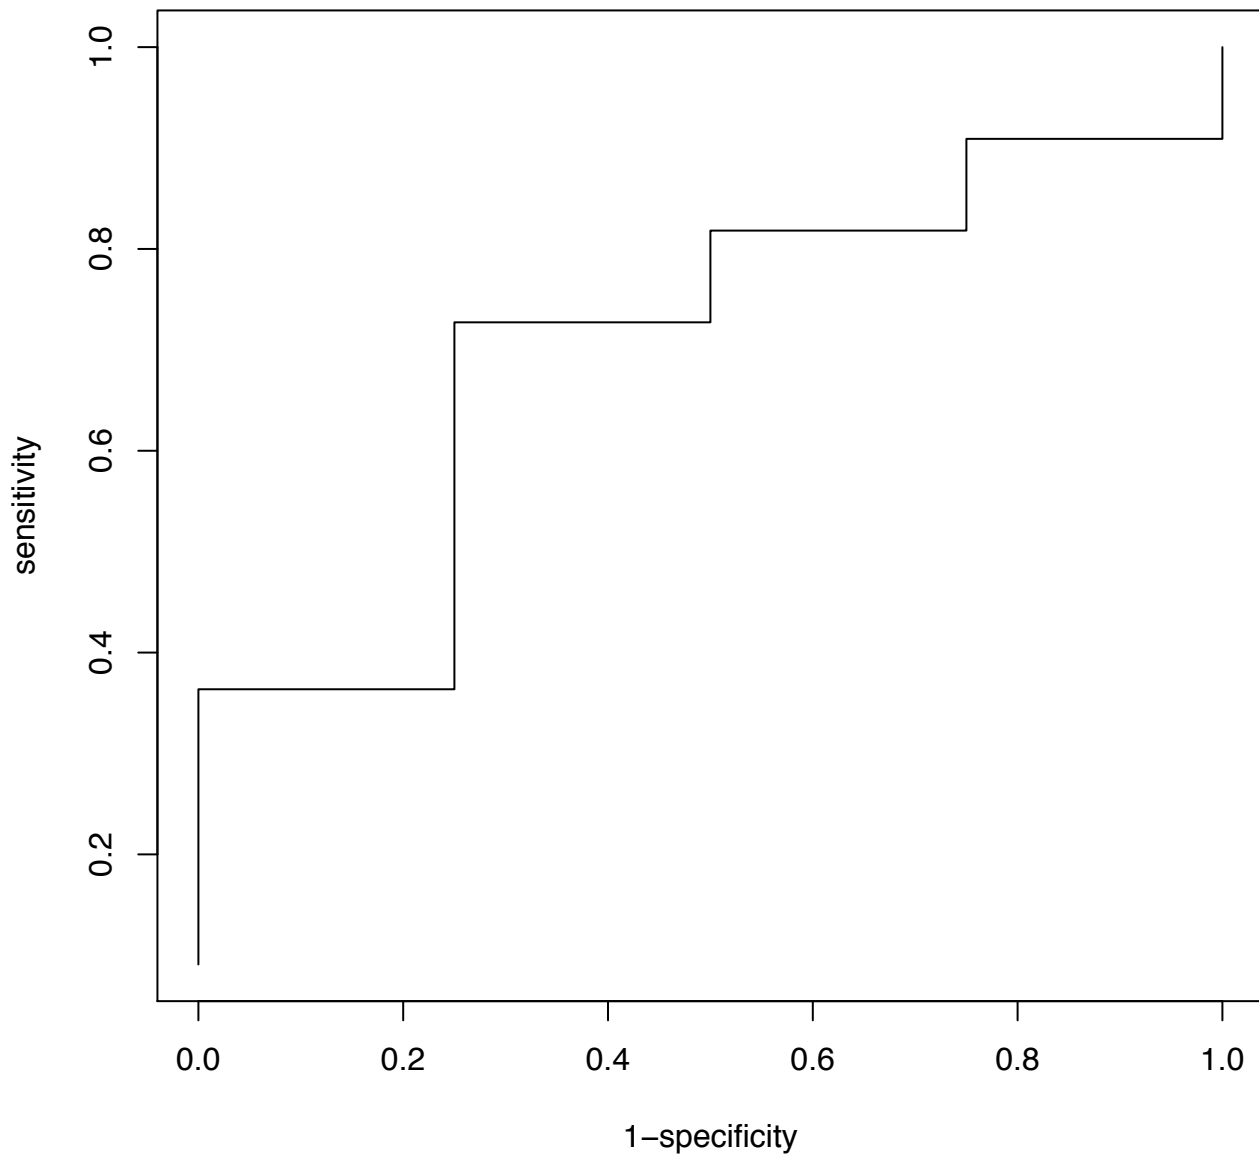

sortie: LumA vs. LumB . Number of peptides: 30

ROC area = 0.68 p-value = 0.17

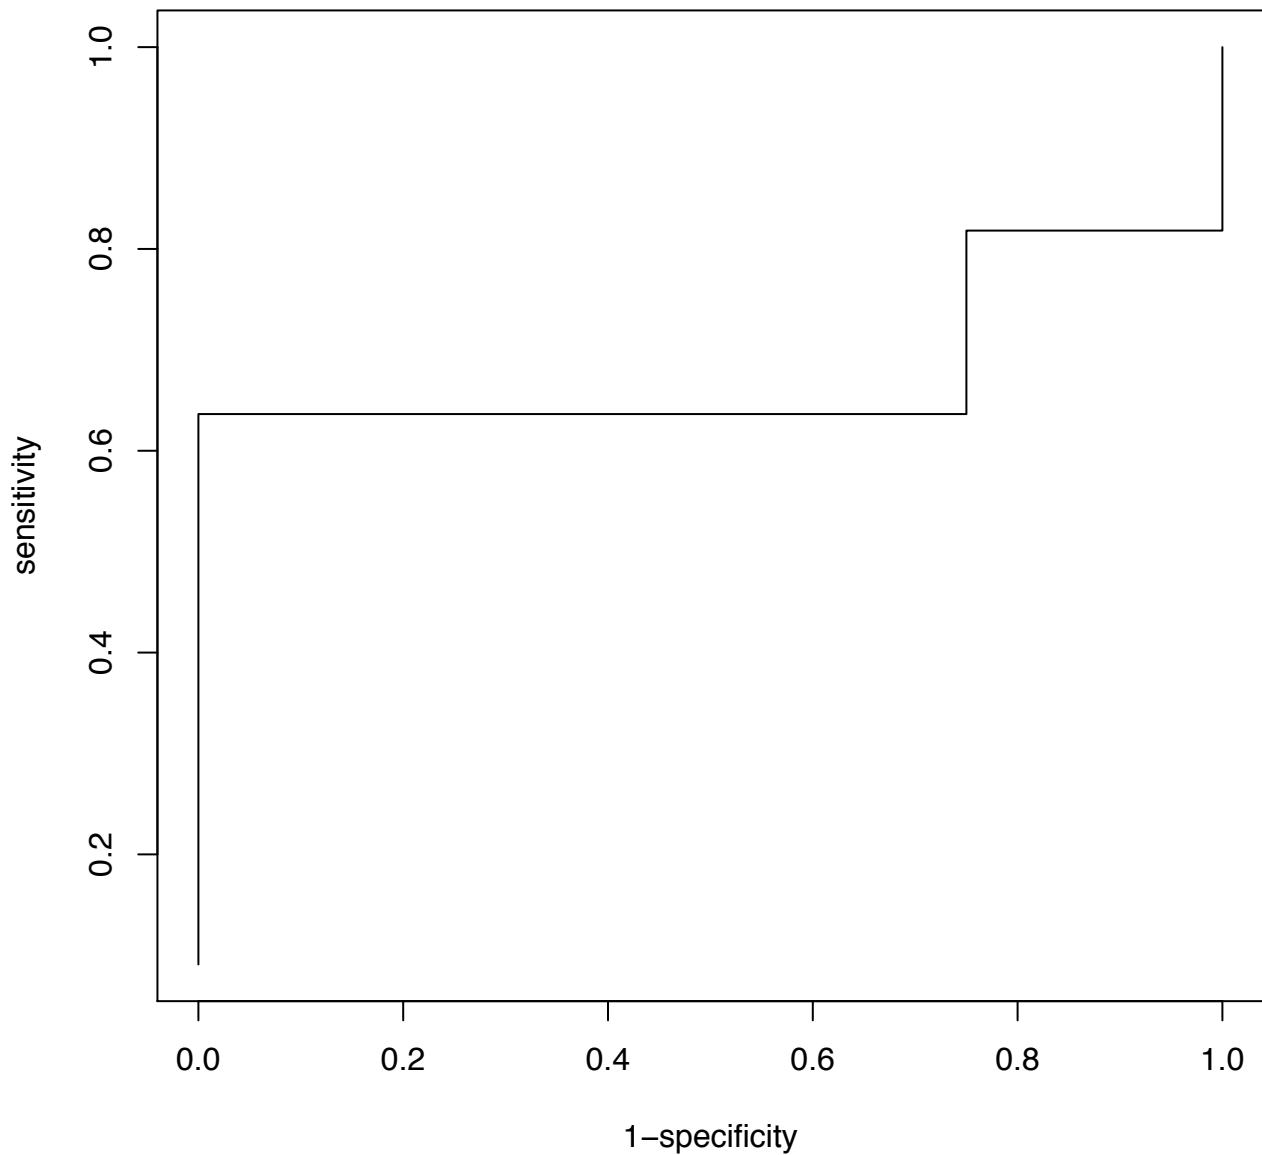

sorlie: LumA vs. LumB . Number of peptides: 40

ROC area = 0.73 p-value = 0.11

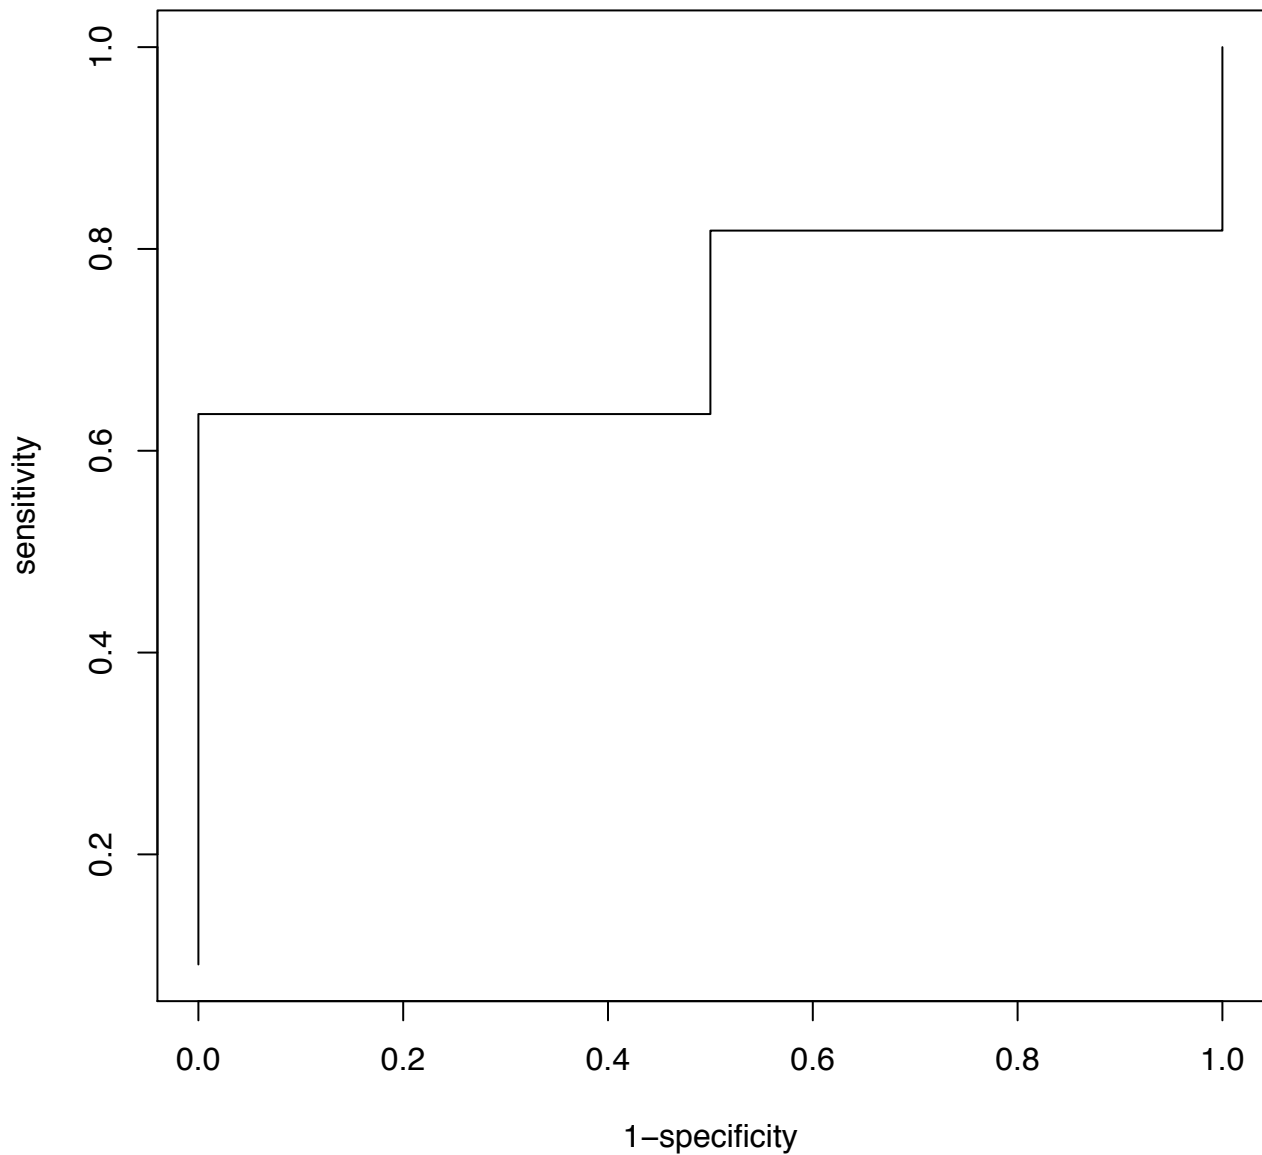

sortie: LumA vs. LumB . Number of peptides: 100

ROC area = 0.84 p-value = 0.028

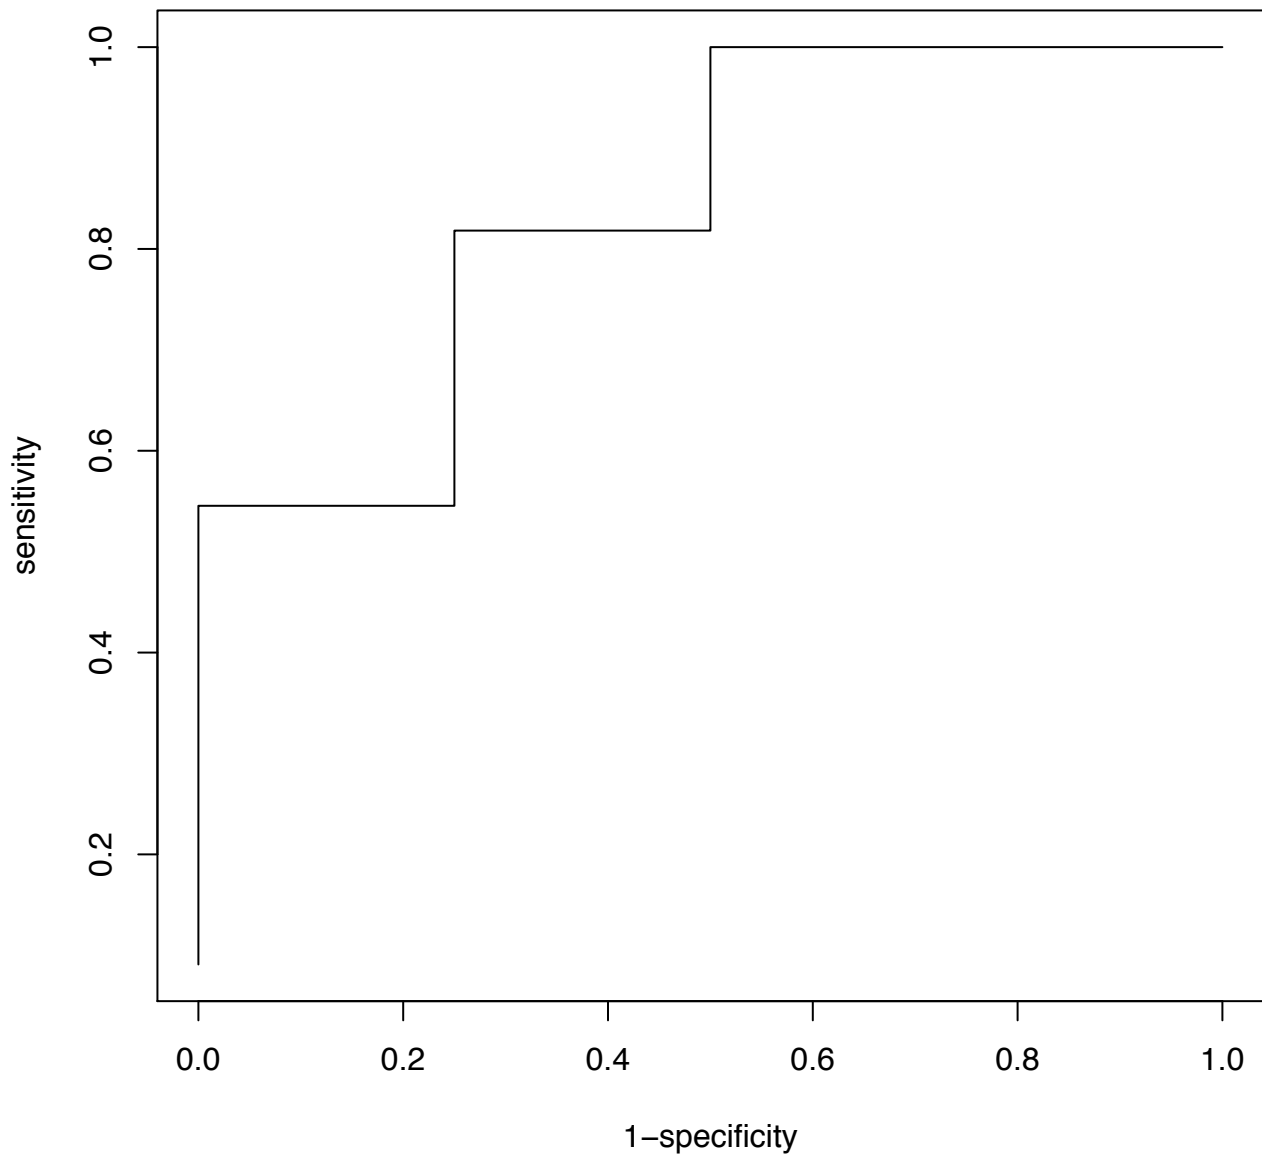

sorlie: LumA vs. LumB . Number of peptides: NA  
ROC area = 0.7 p-value = 0.14

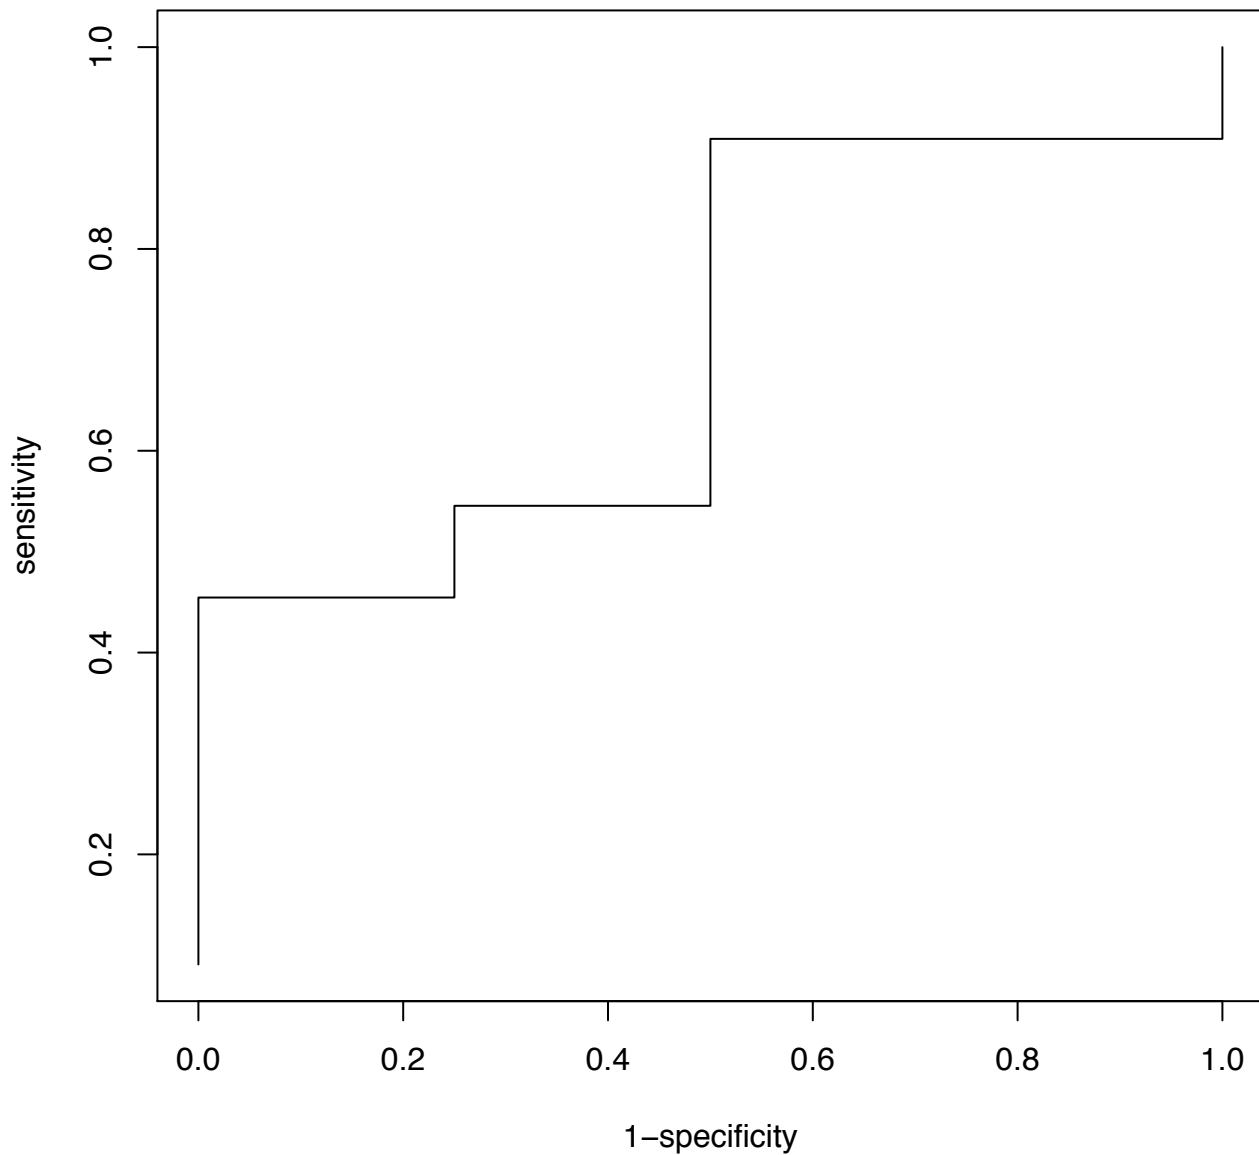

pam50: LumA vs. LumB . Number of peptides: 20  
ROC area = 0.33 p-value = 0.87

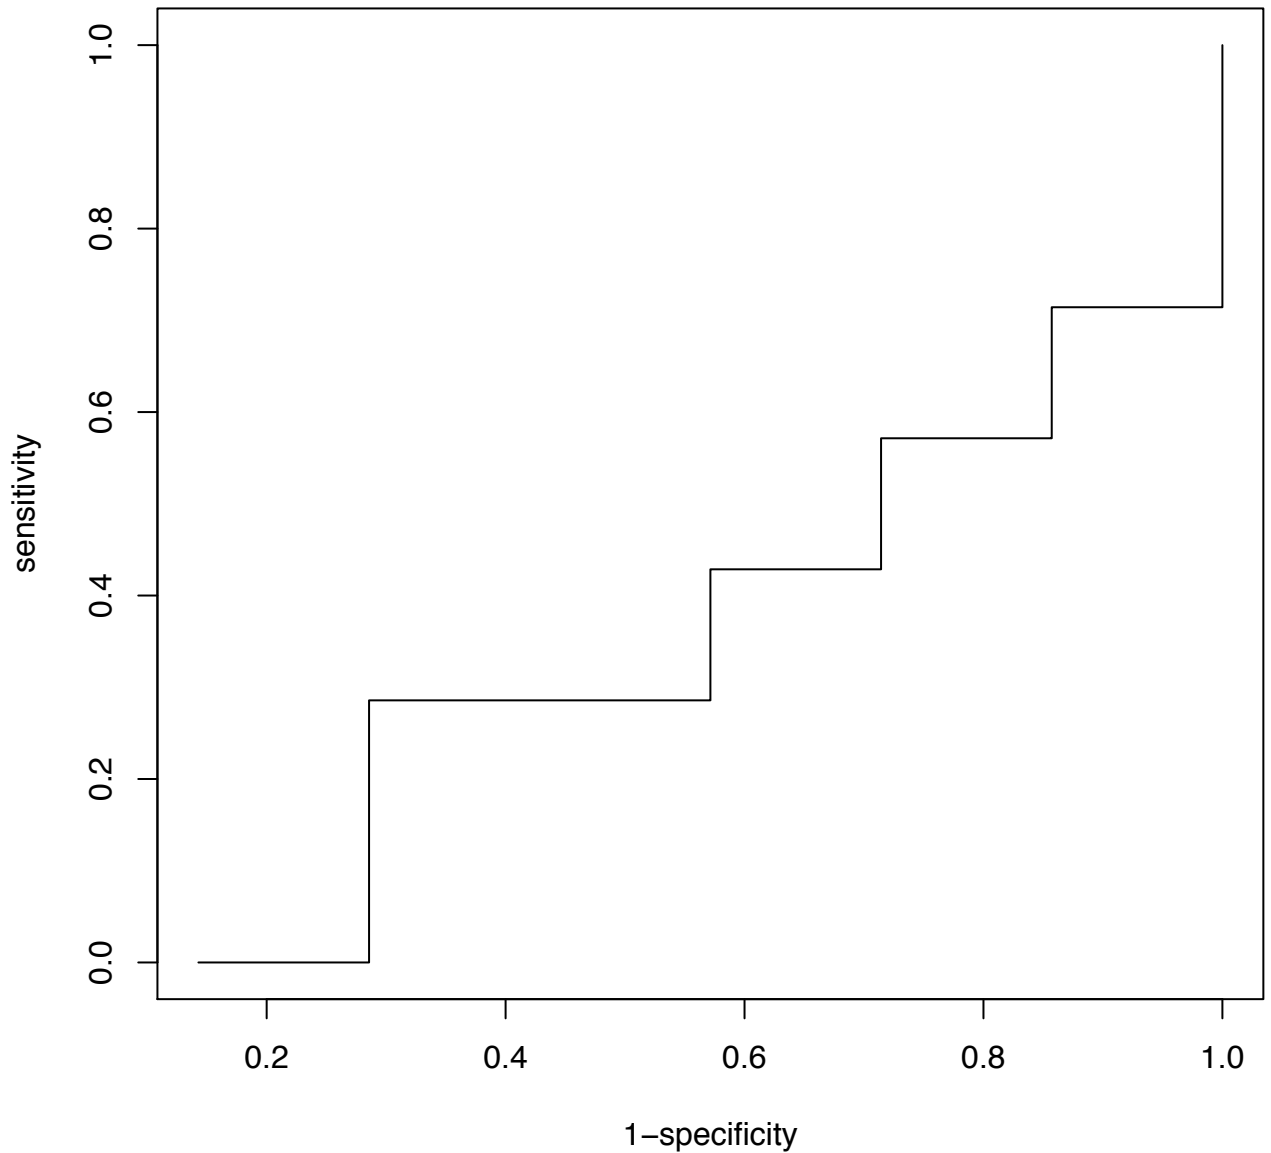

pam50: LumA vs. LumB . Number of peptides: 30

ROC area = 0.24 p-value = 0.95

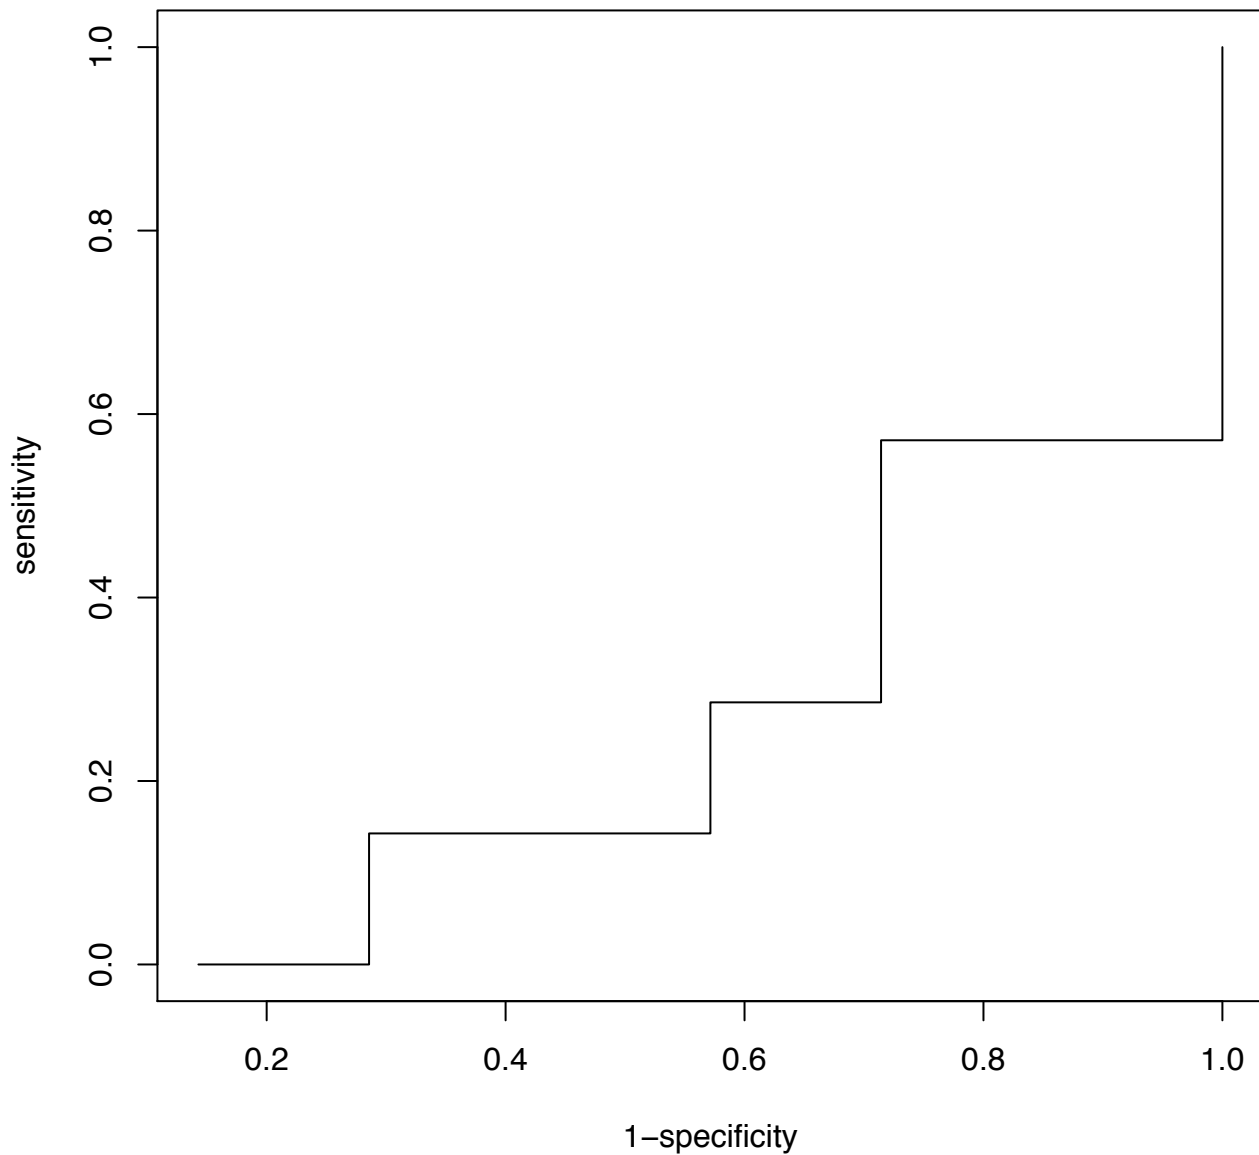



pam50: LumA vs. LumB . Number of peptides: 40

ROC area = 0.27 p-value = 0.94

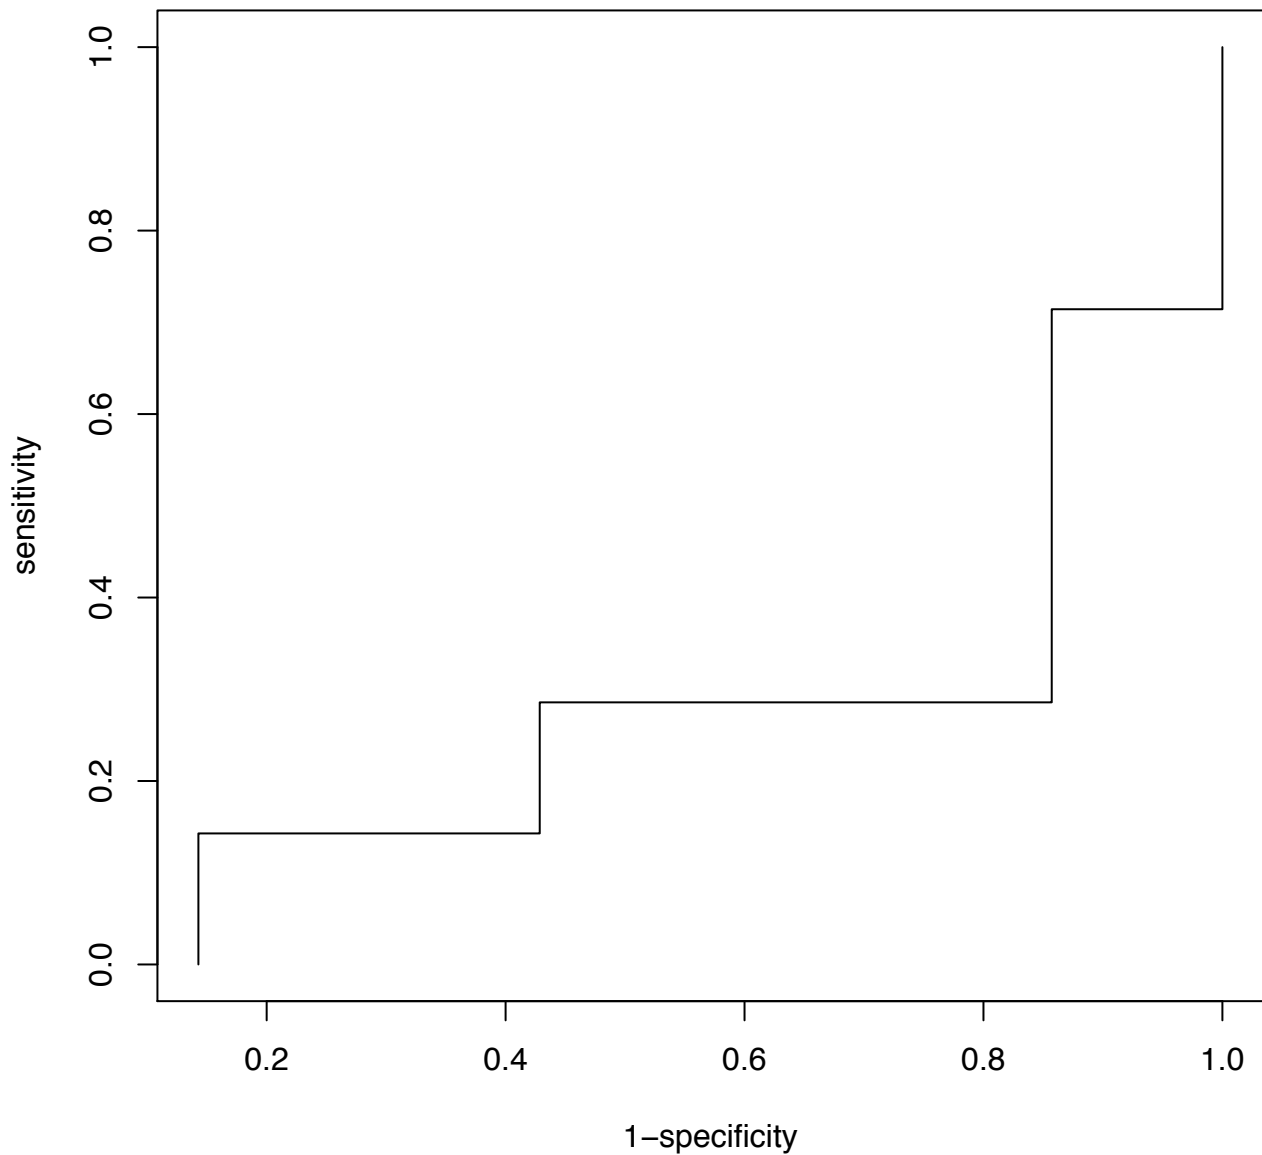

pam50: LumA vs. LumB . Number of peptides: 100

ROC area = 0.22 p-value = 0.96

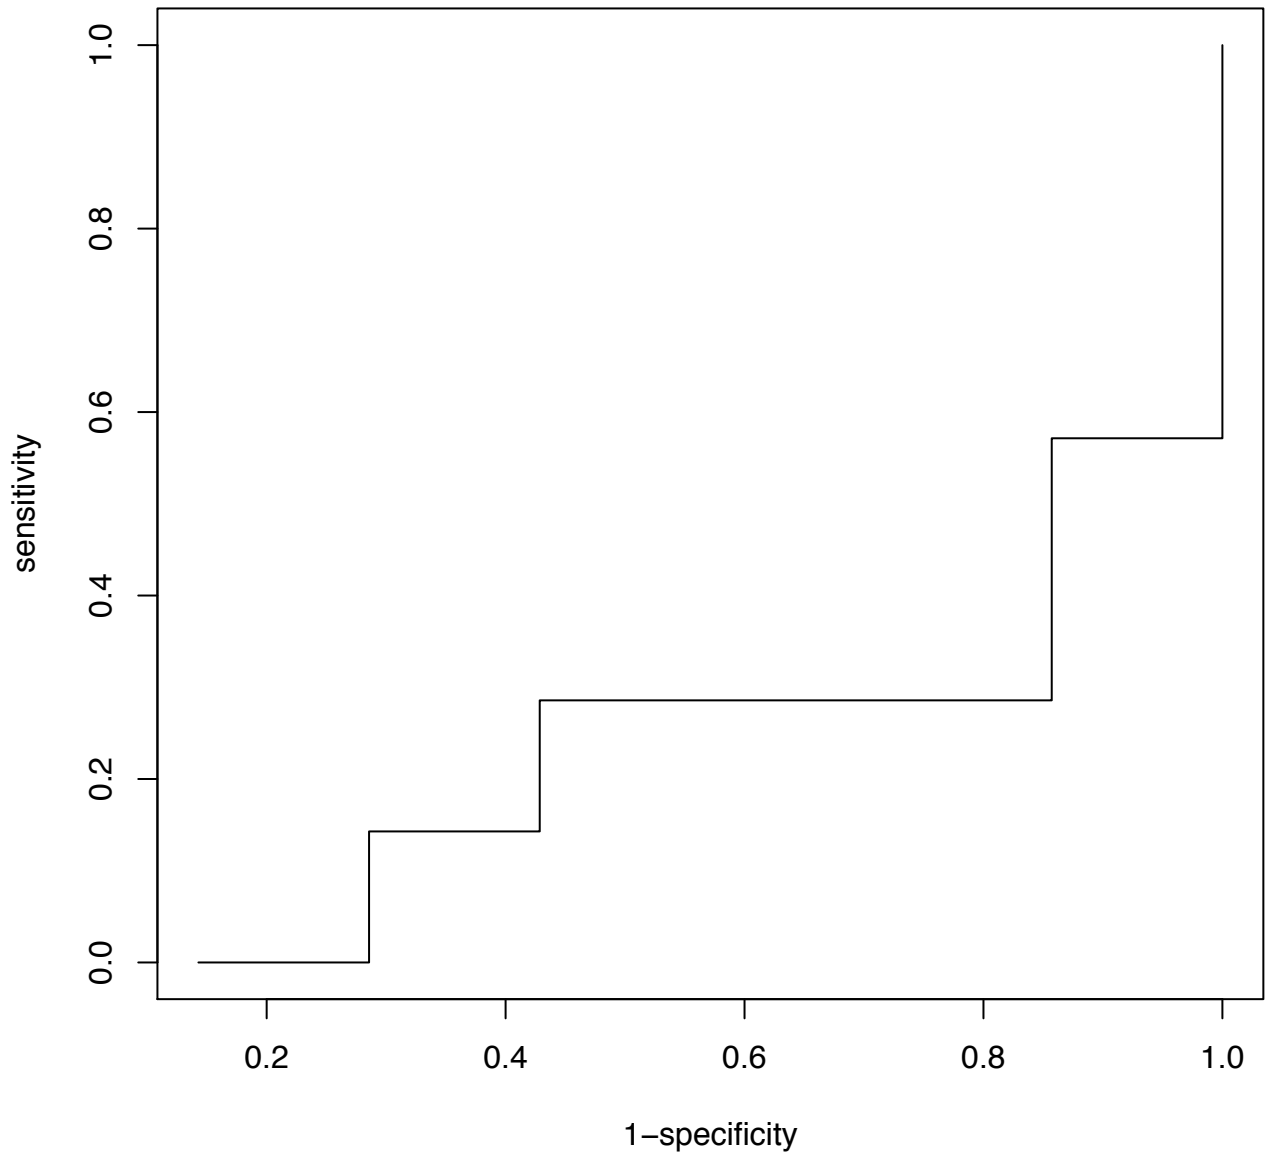

pam50: LumA vs. LumB . Number of peptides: NA  
ROC area = 0.27 p-value = 0.94

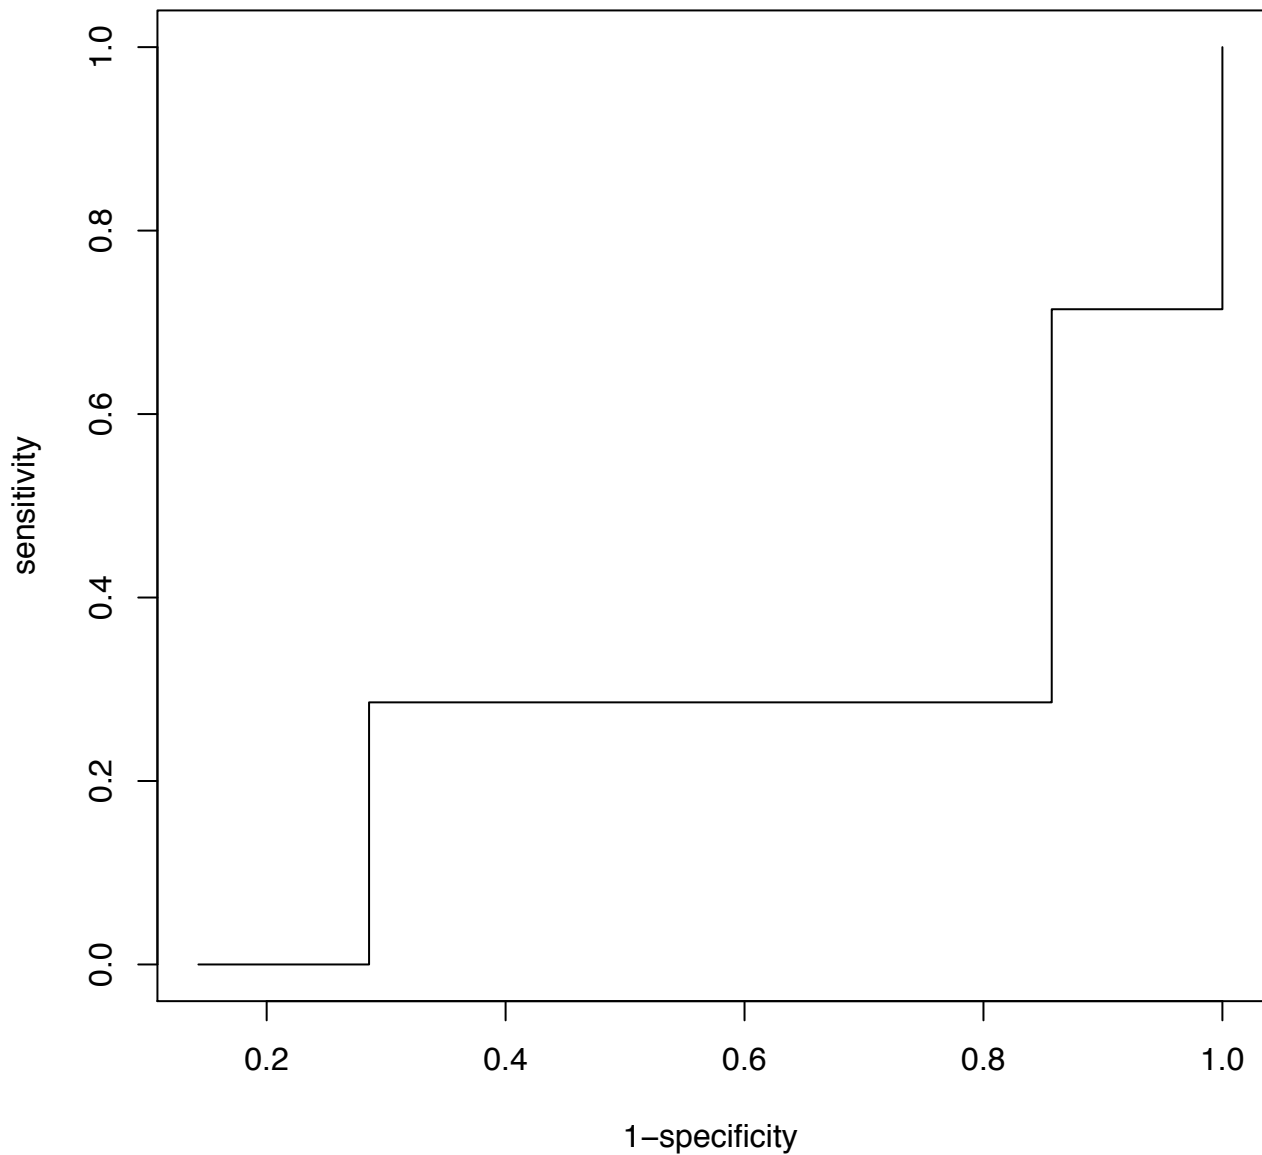

hu: LumA vs. LumB . Number of peptides: 20

ROC area = 0.75 p-value = 0.089

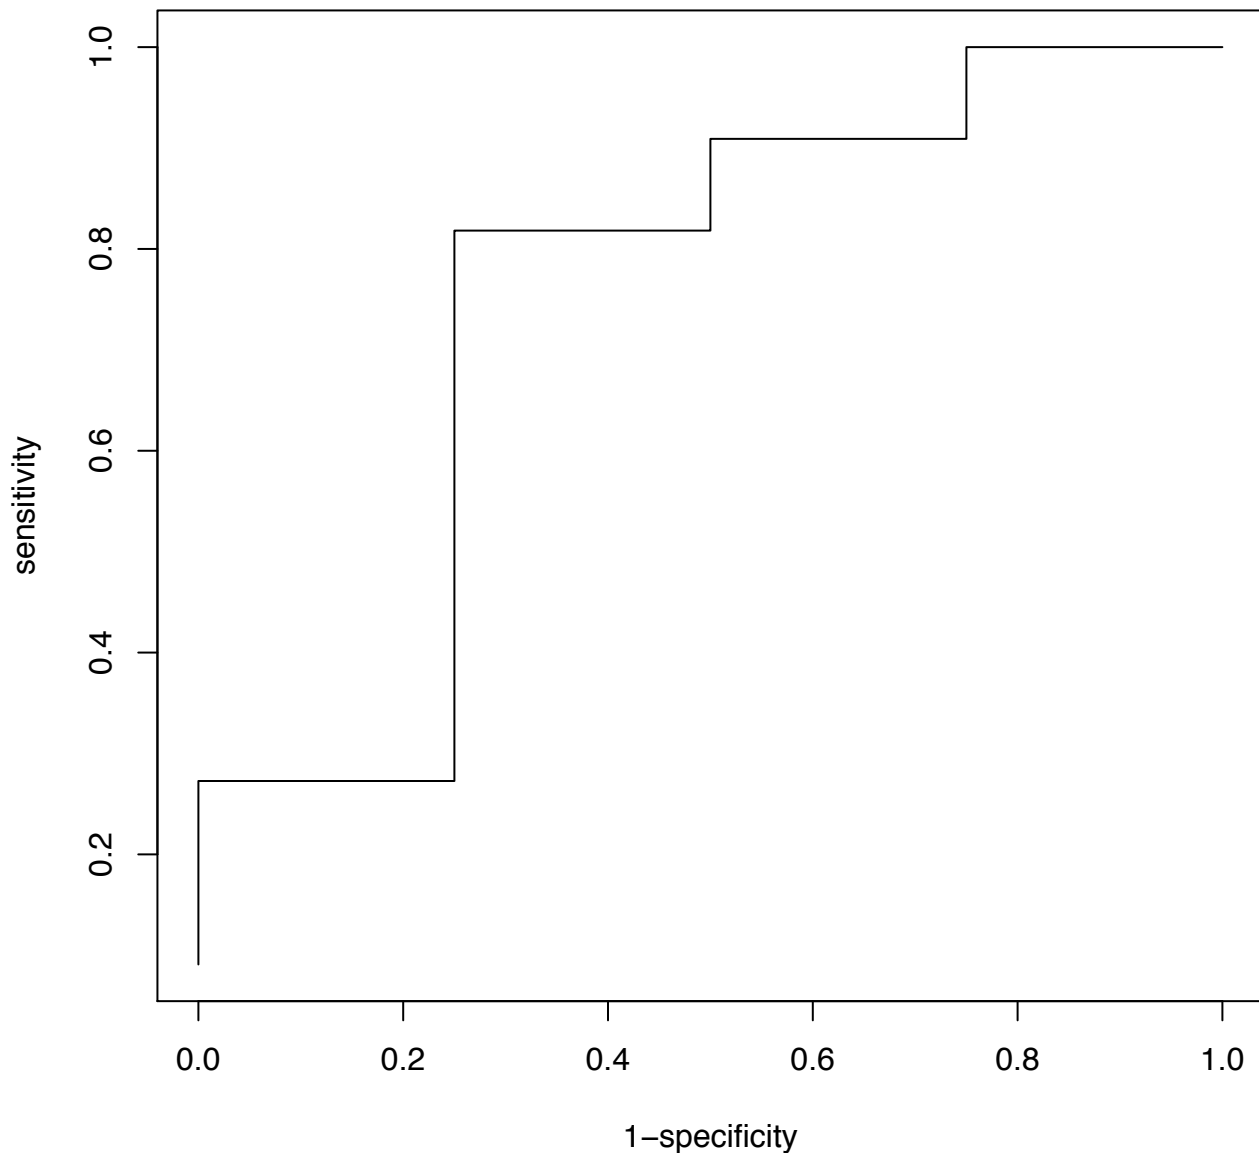

hu: LumA vs. LumB . Number of peptides: 30

ROC area = 0.73 p-value = 0.11

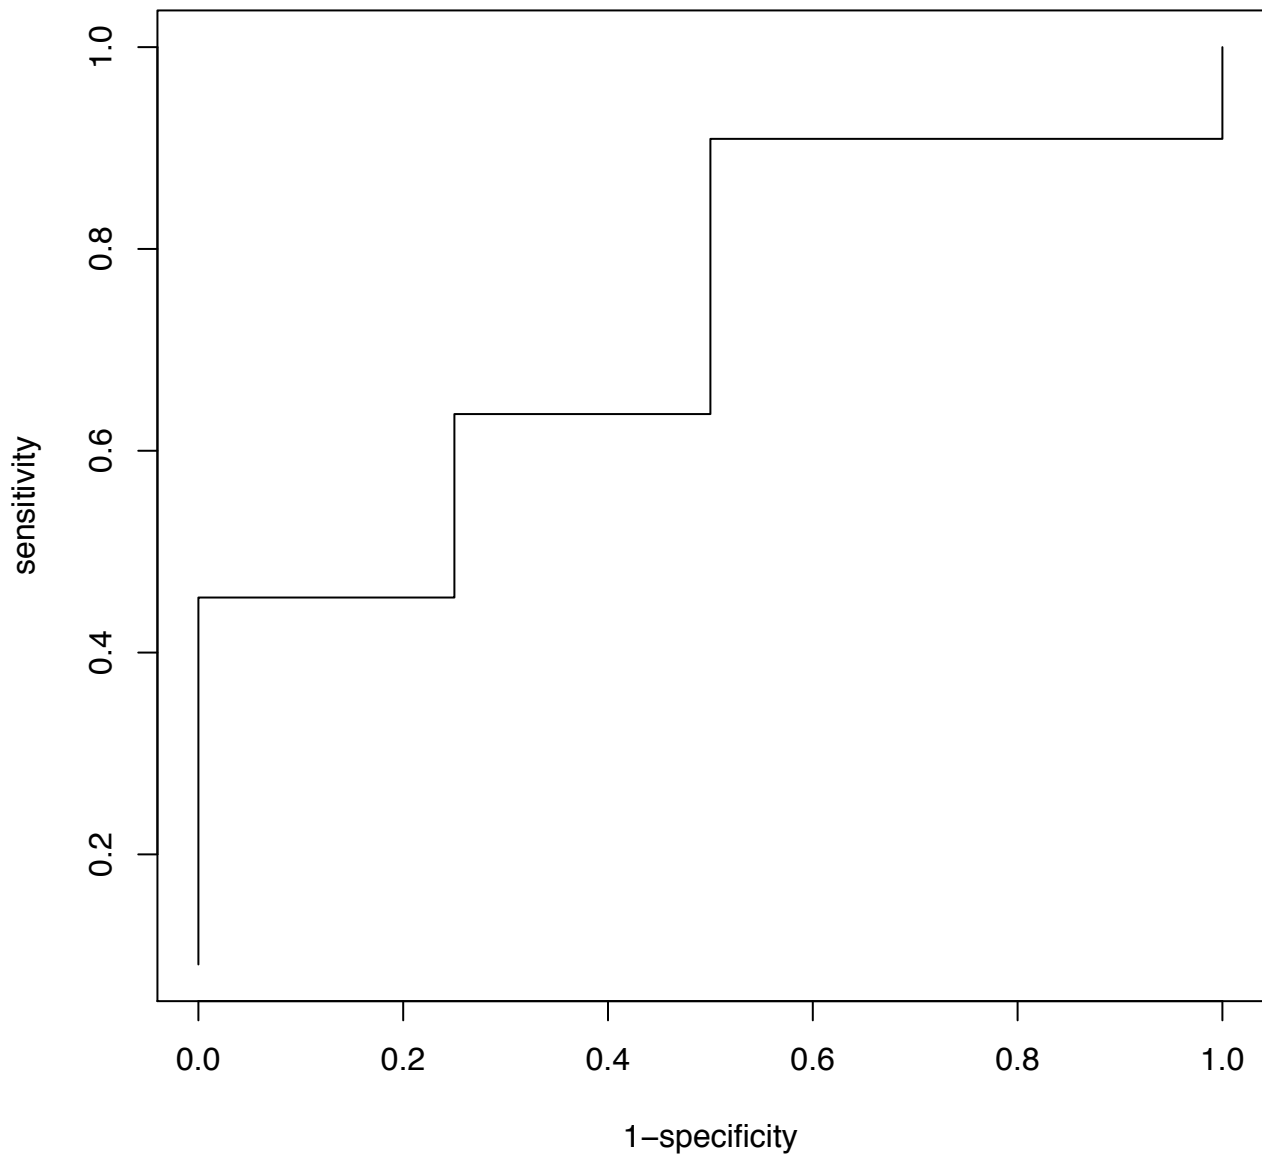

hu: LumA vs. LumB . Number of peptides: 40

ROC area = 0.75 p-value = 0.089

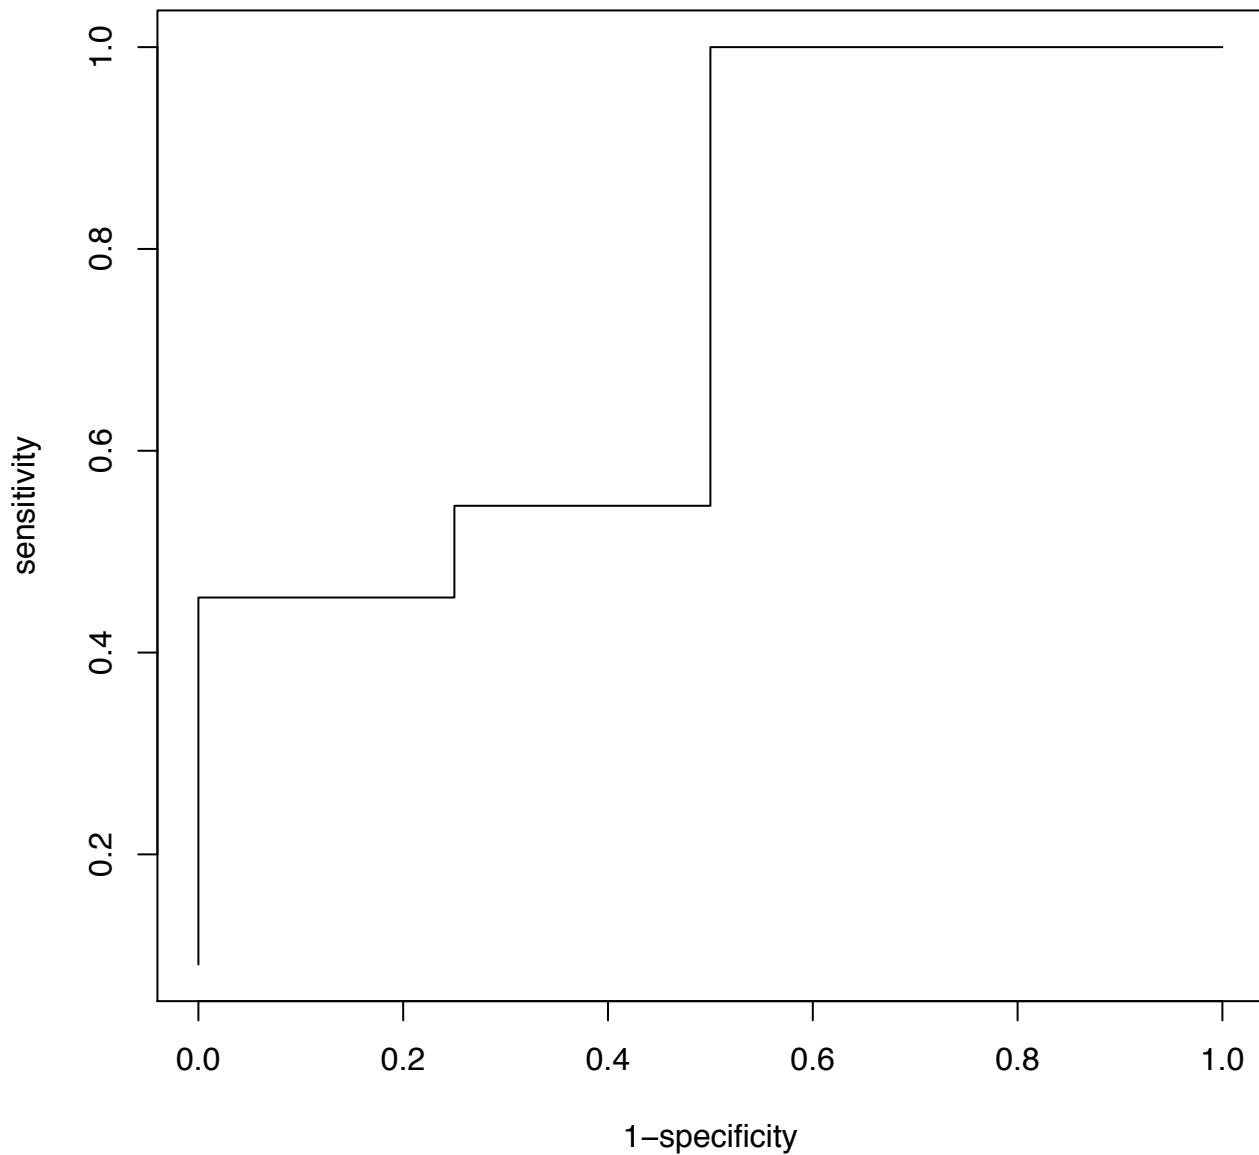

hu: LumA vs. LumB . Number of peptides: 100

ROC area = 0.8 p-value = 0.052

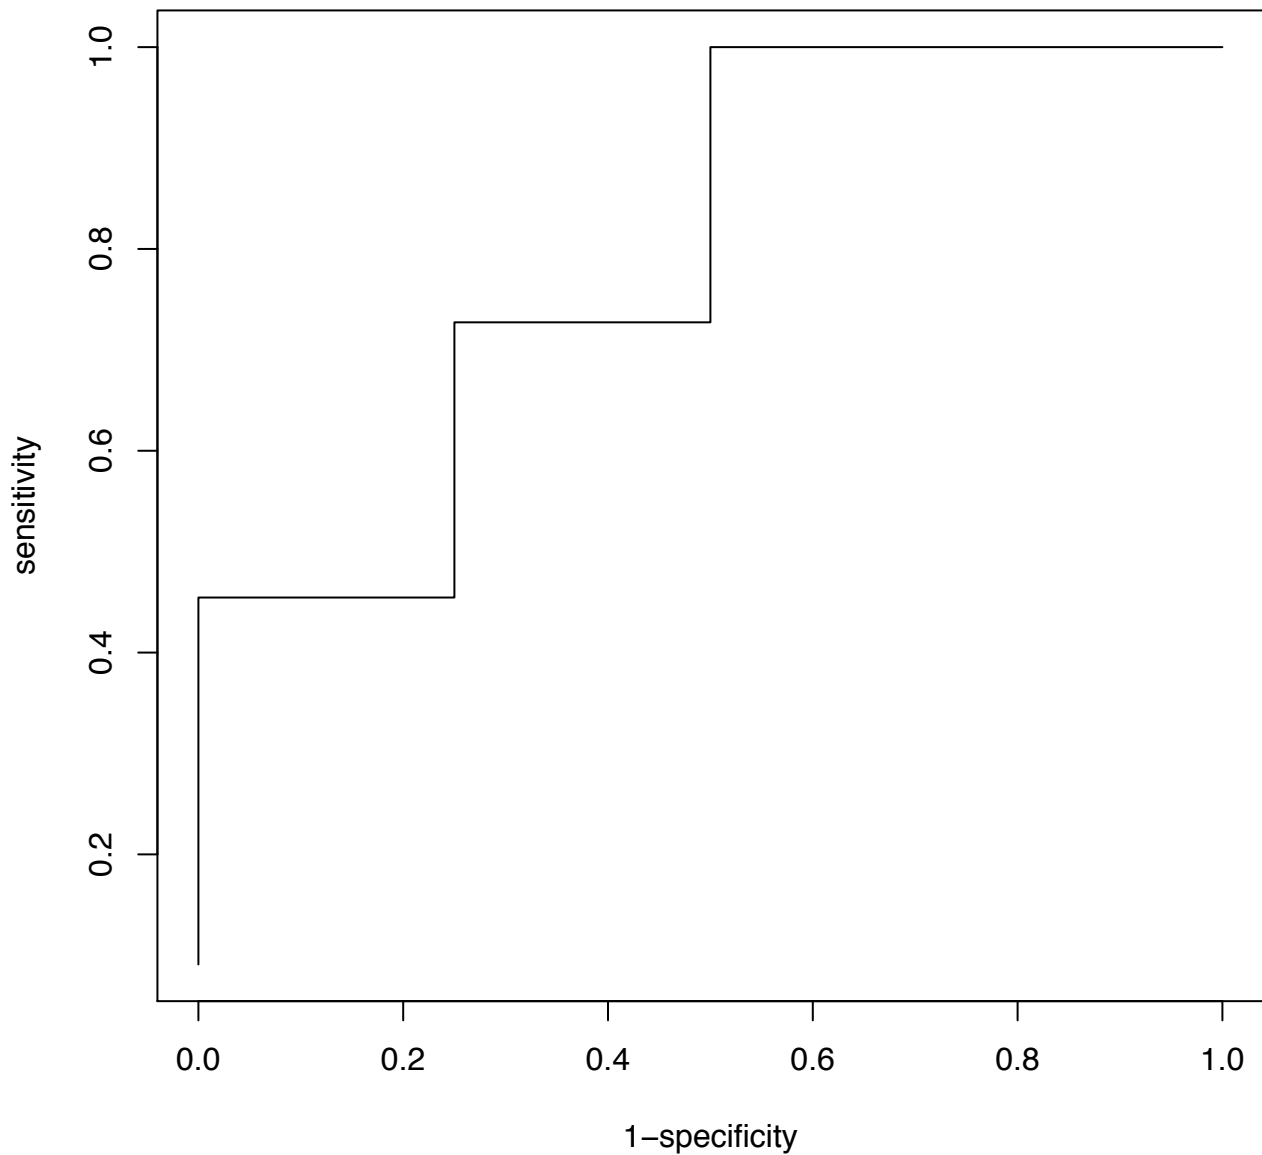

hu: LumA vs. LumB . Number of peptides: NA

ROC area = 0.77 p-value = 0.069

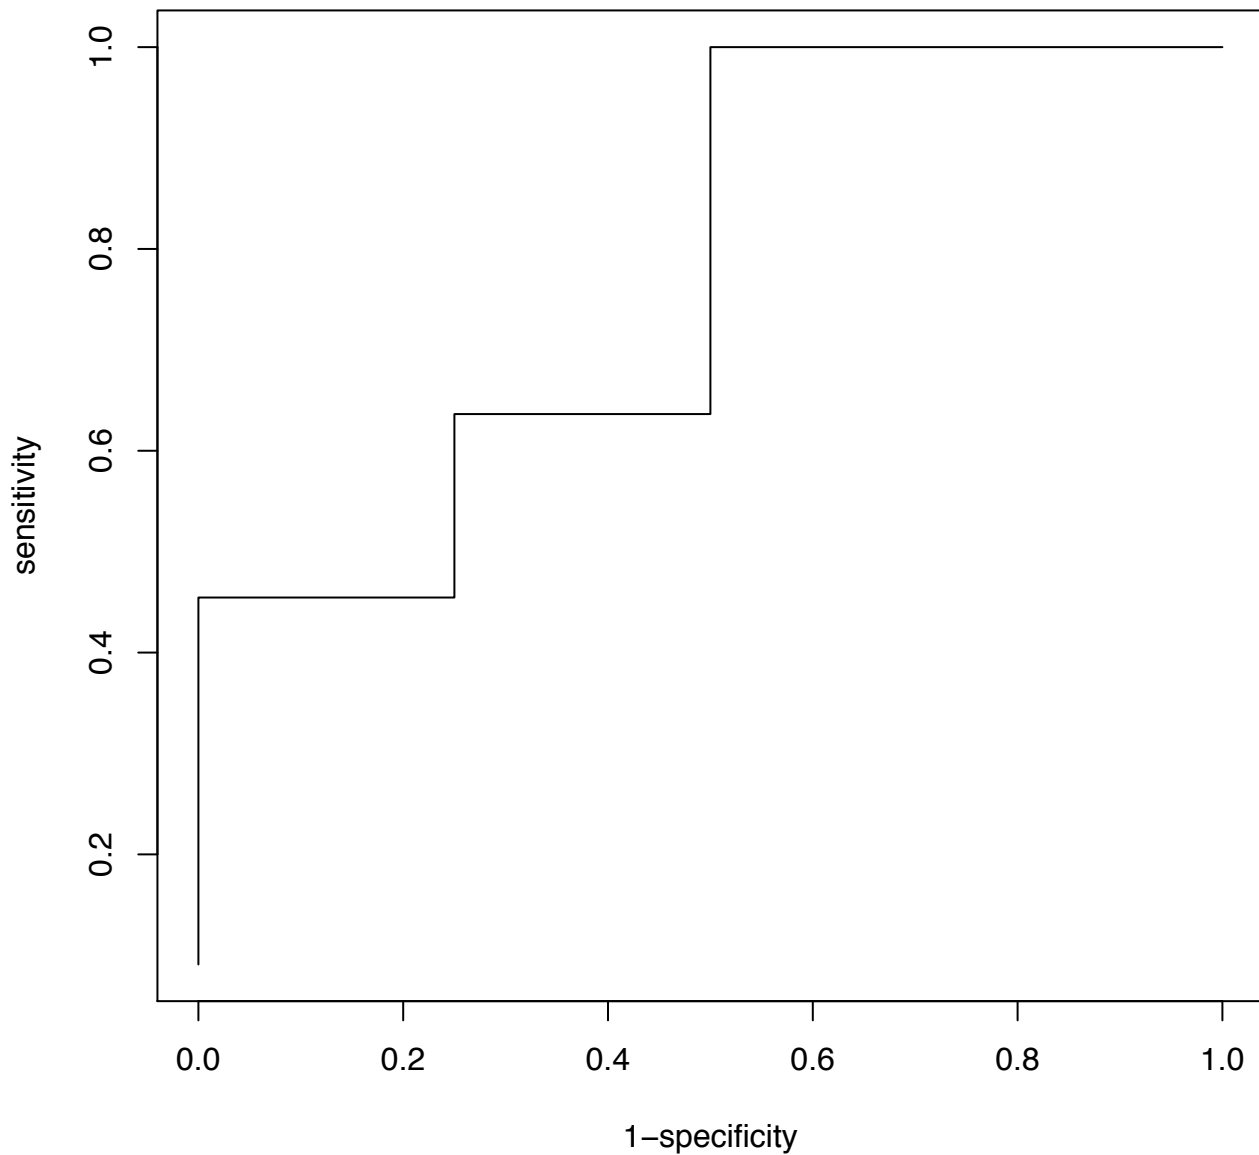



sortie: LumA vs. Normal . Number of peptides: 20

ROC area = 0.5 p-value = 0.53

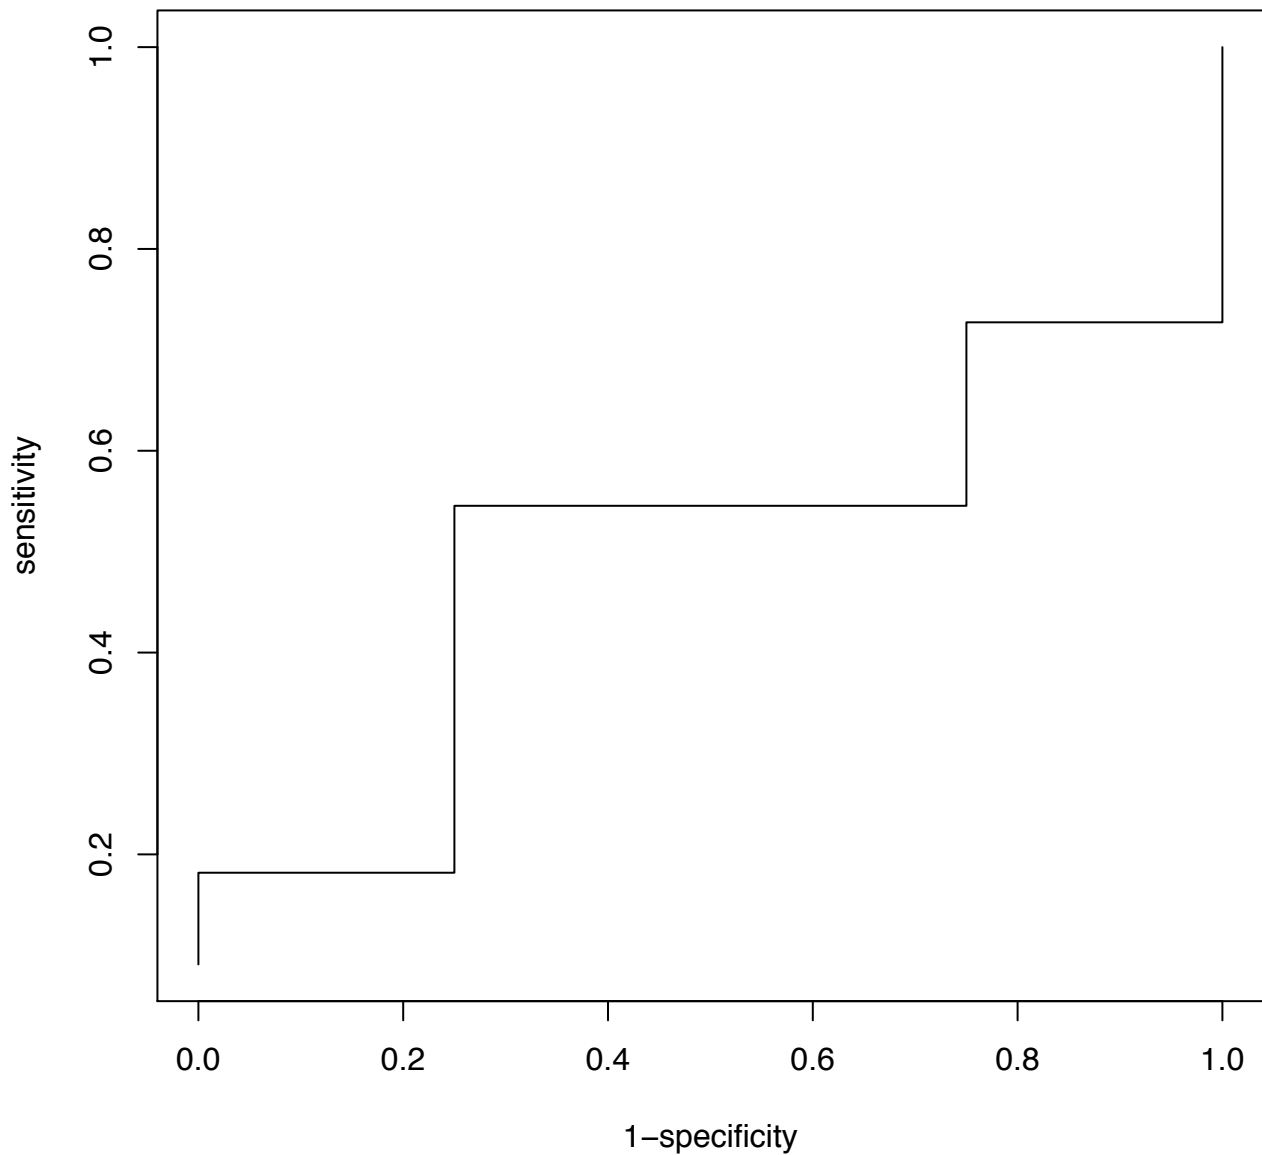

sortie: LumA vs. Normal . Number of peptides: 30

ROC area = 0.59 p-value = 0.33

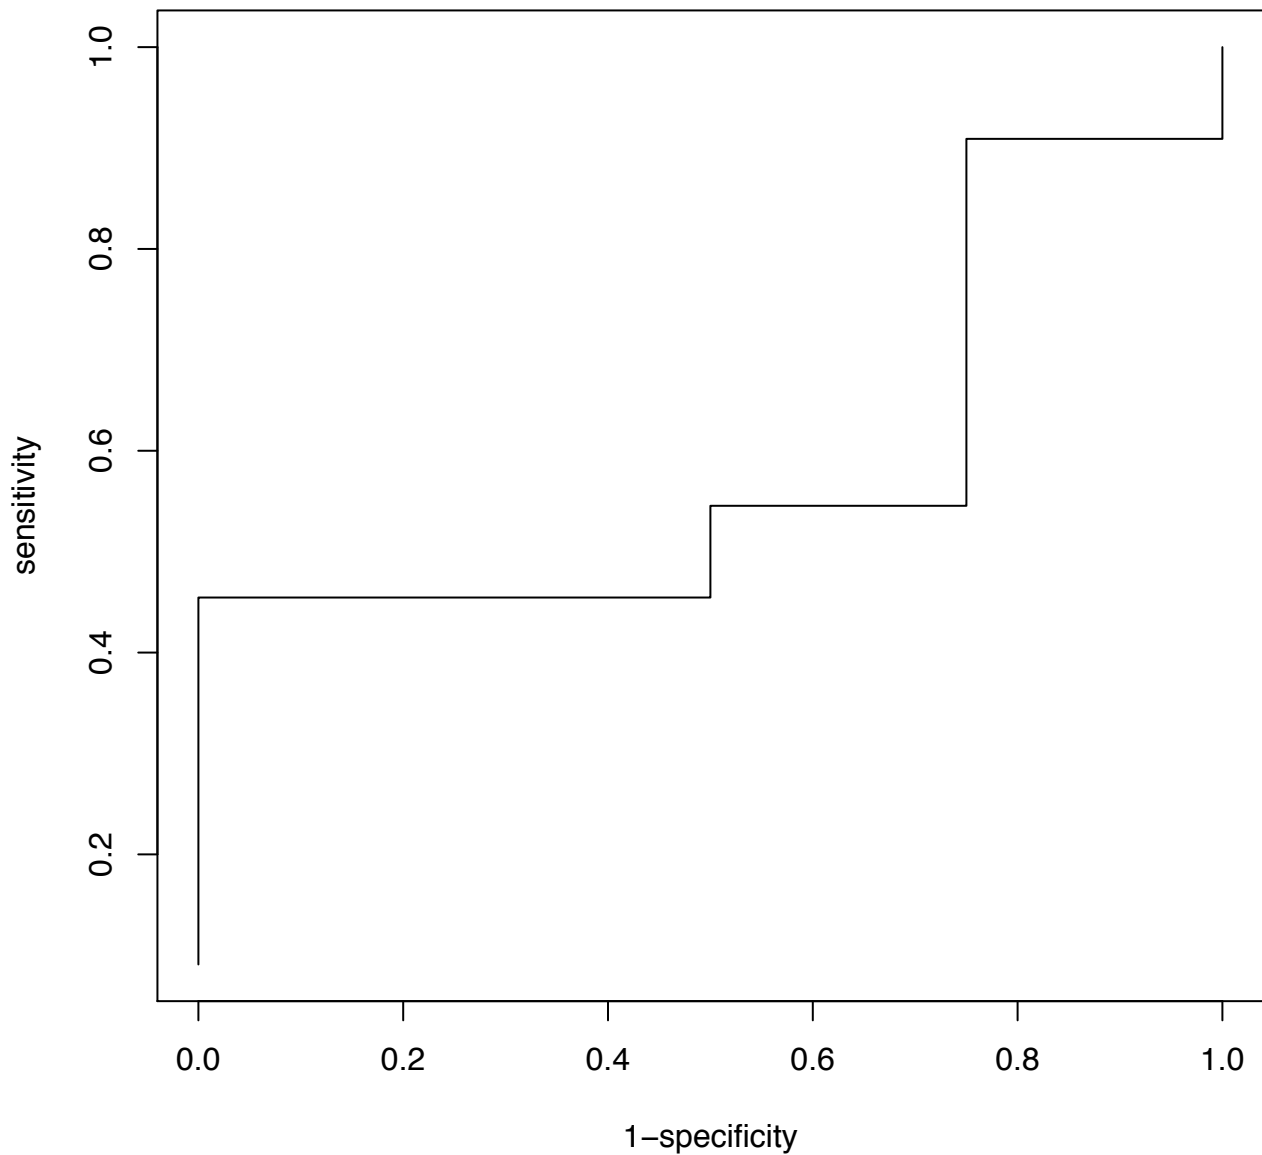

sortie: LumA vs. Normal . Number of peptides: 40

ROC area = 0.59 p-value = 0.33

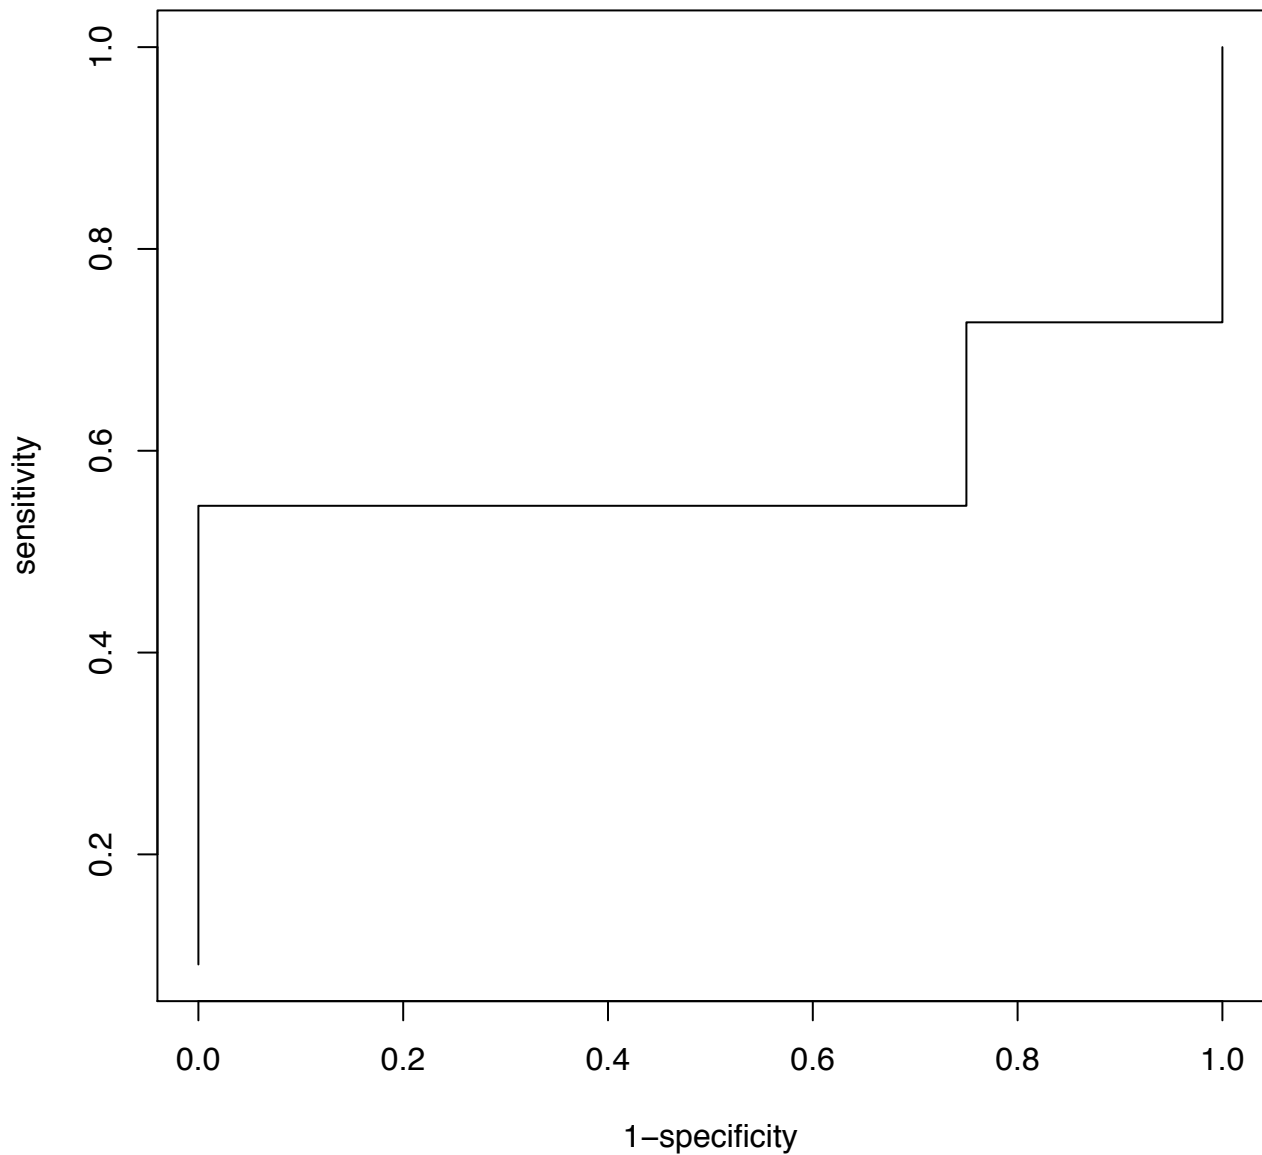

sorlie: LumA vs. Normal . Number of peptides: 100

ROC area = 0.64 p-value = 0.24

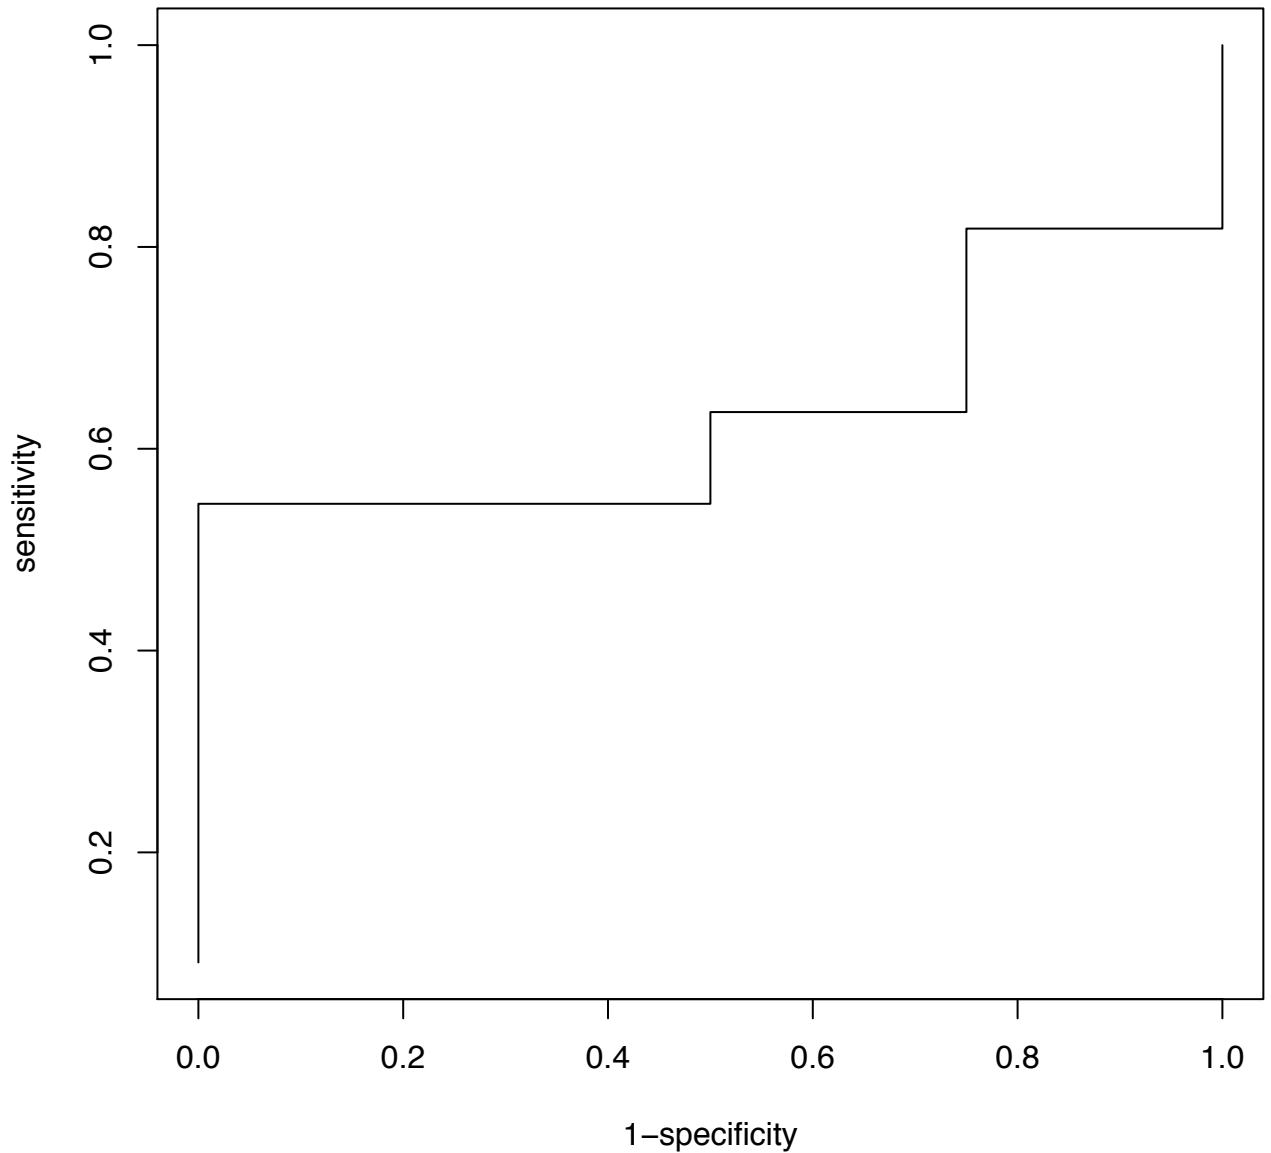

sorlie: LumA vs. Normal . Number of peptides: NA  
ROC area = 0.66 p-value = 0.21

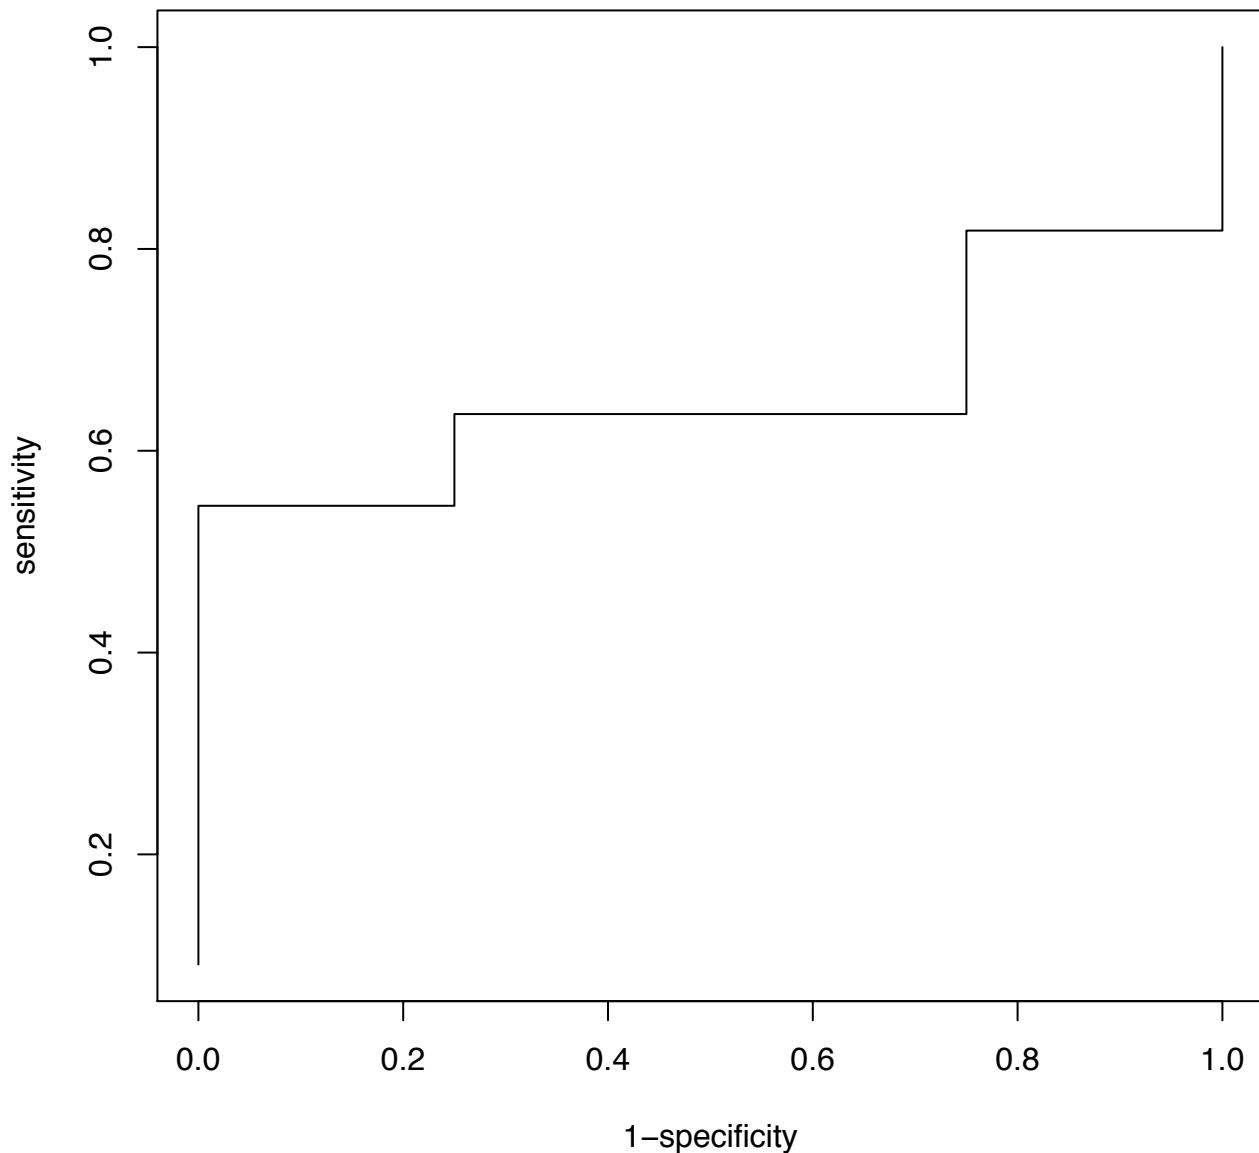

pam50: LumA vs. Normal . Number of peptides: 20

ROC area = 0.52 p-value = 0.47

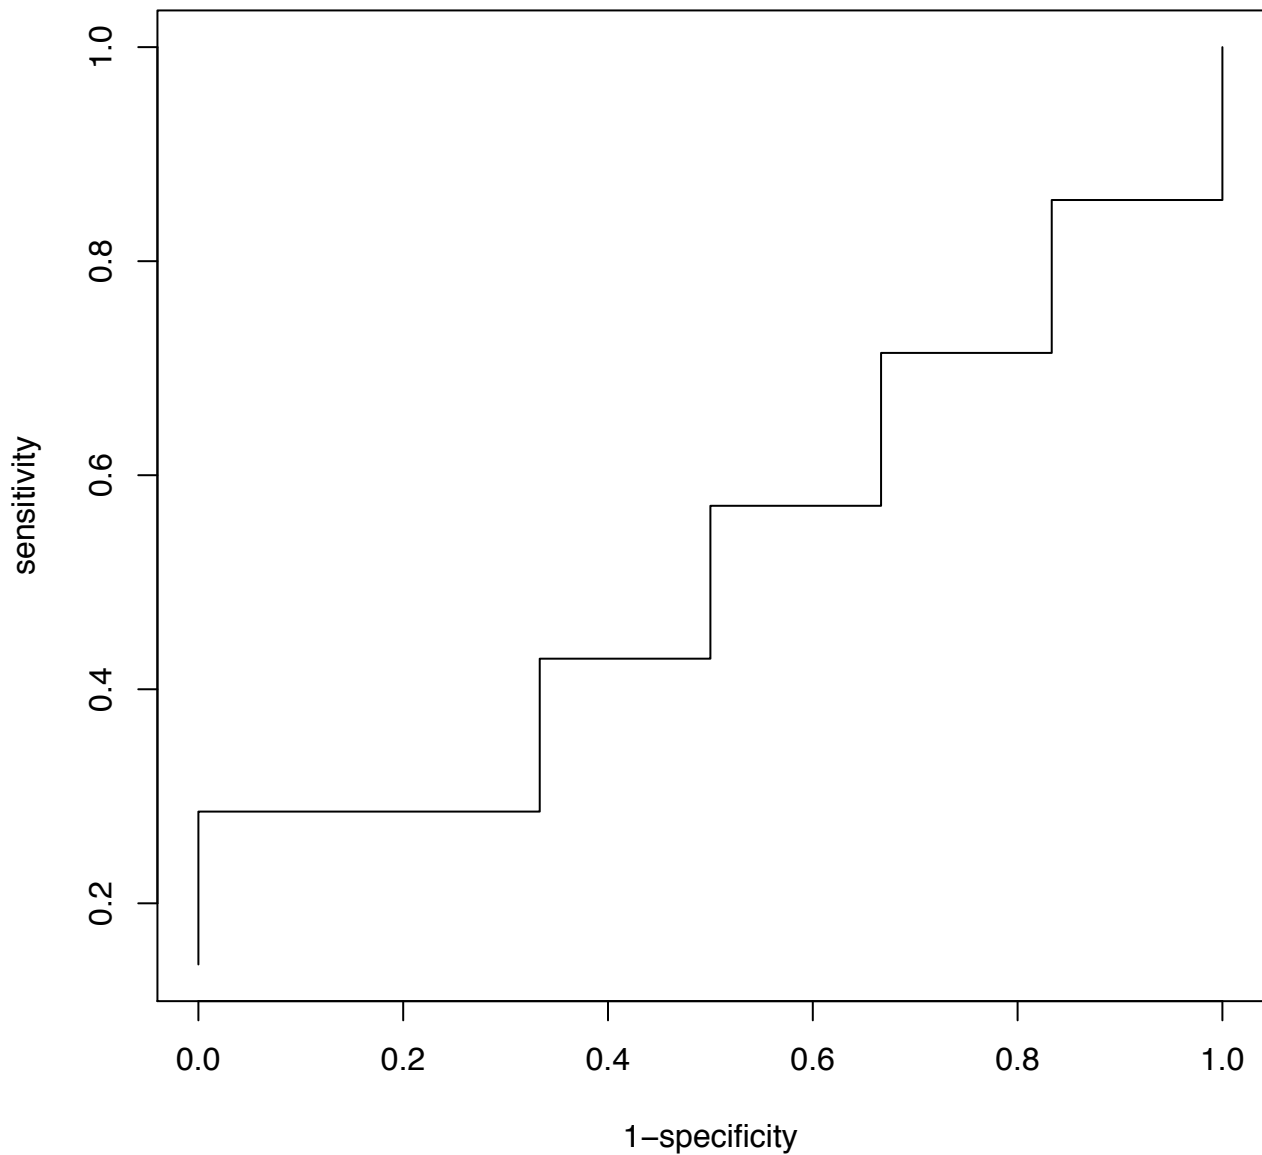

pam50: LumA vs. Normal . Number of peptides: 30

ROC area = 0.67 p-value = 0.18

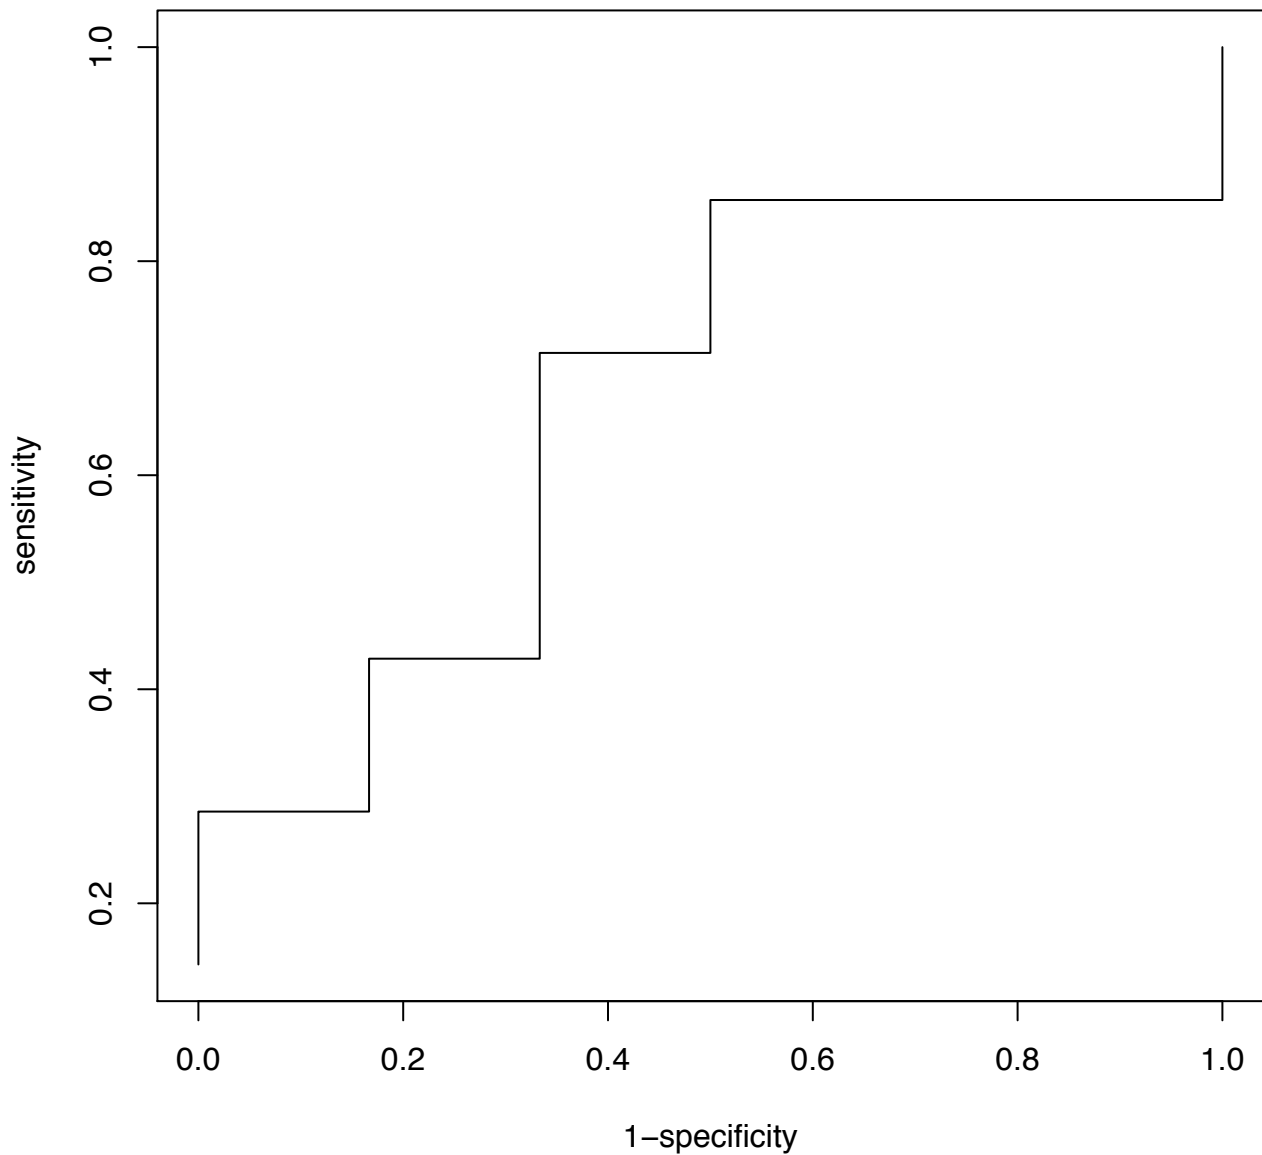

pam50: LumA vs. Normal . Number of peptides: 40  
ROC area = 0.83 p-value = 0.026

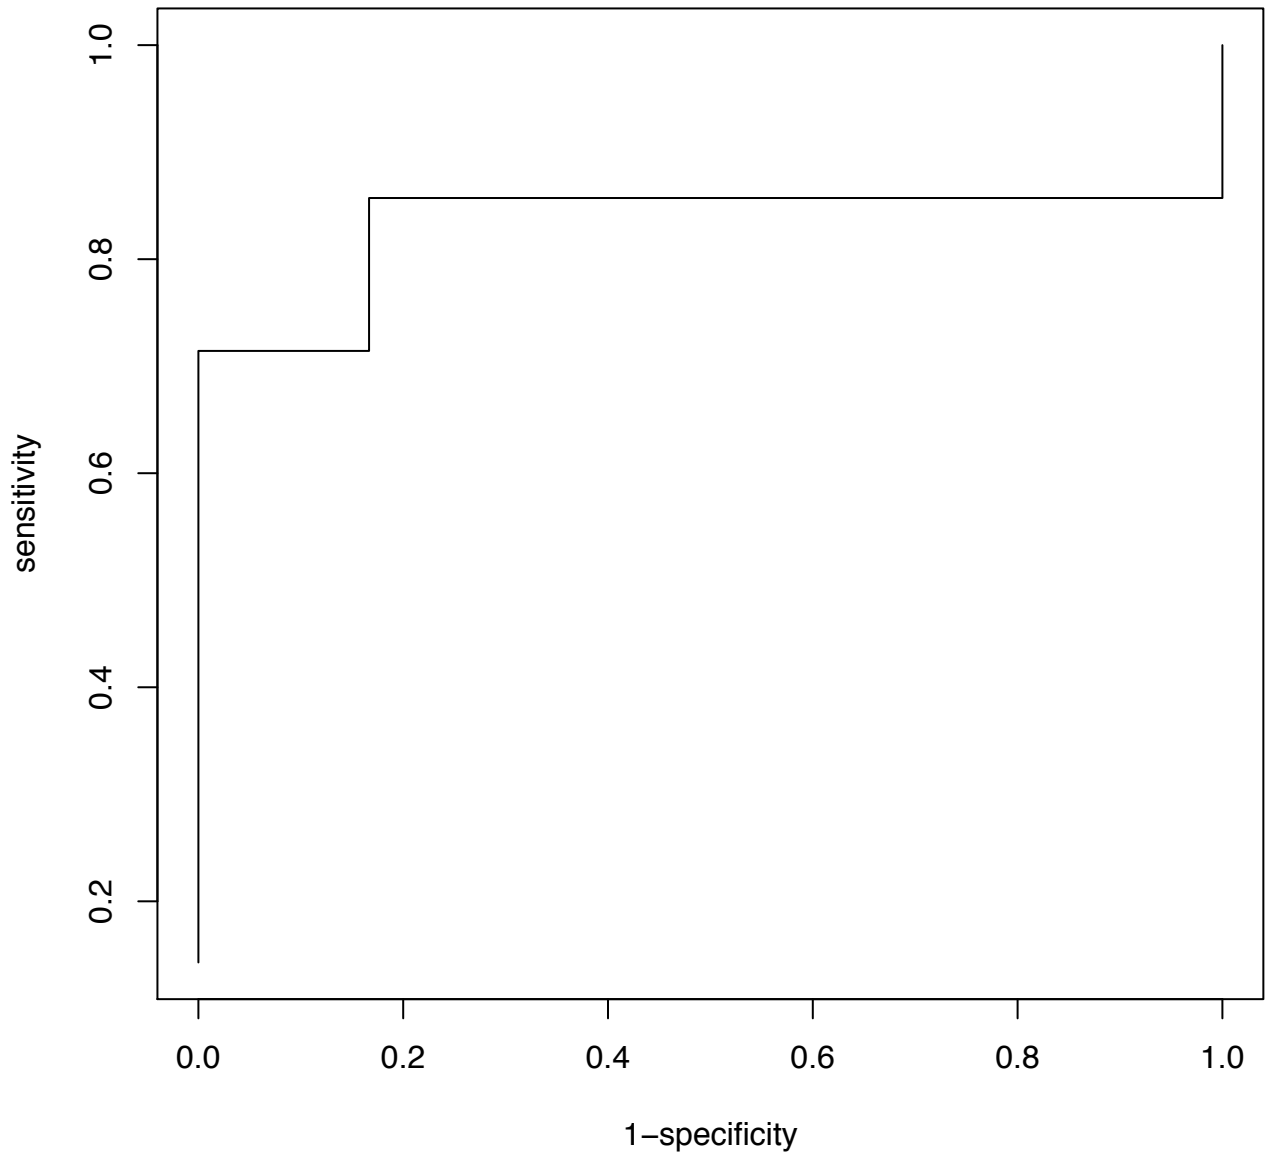



pam50: LumA vs. Normal . Number of peptides: 100

ROC area = 0.81 p-value = 0.037

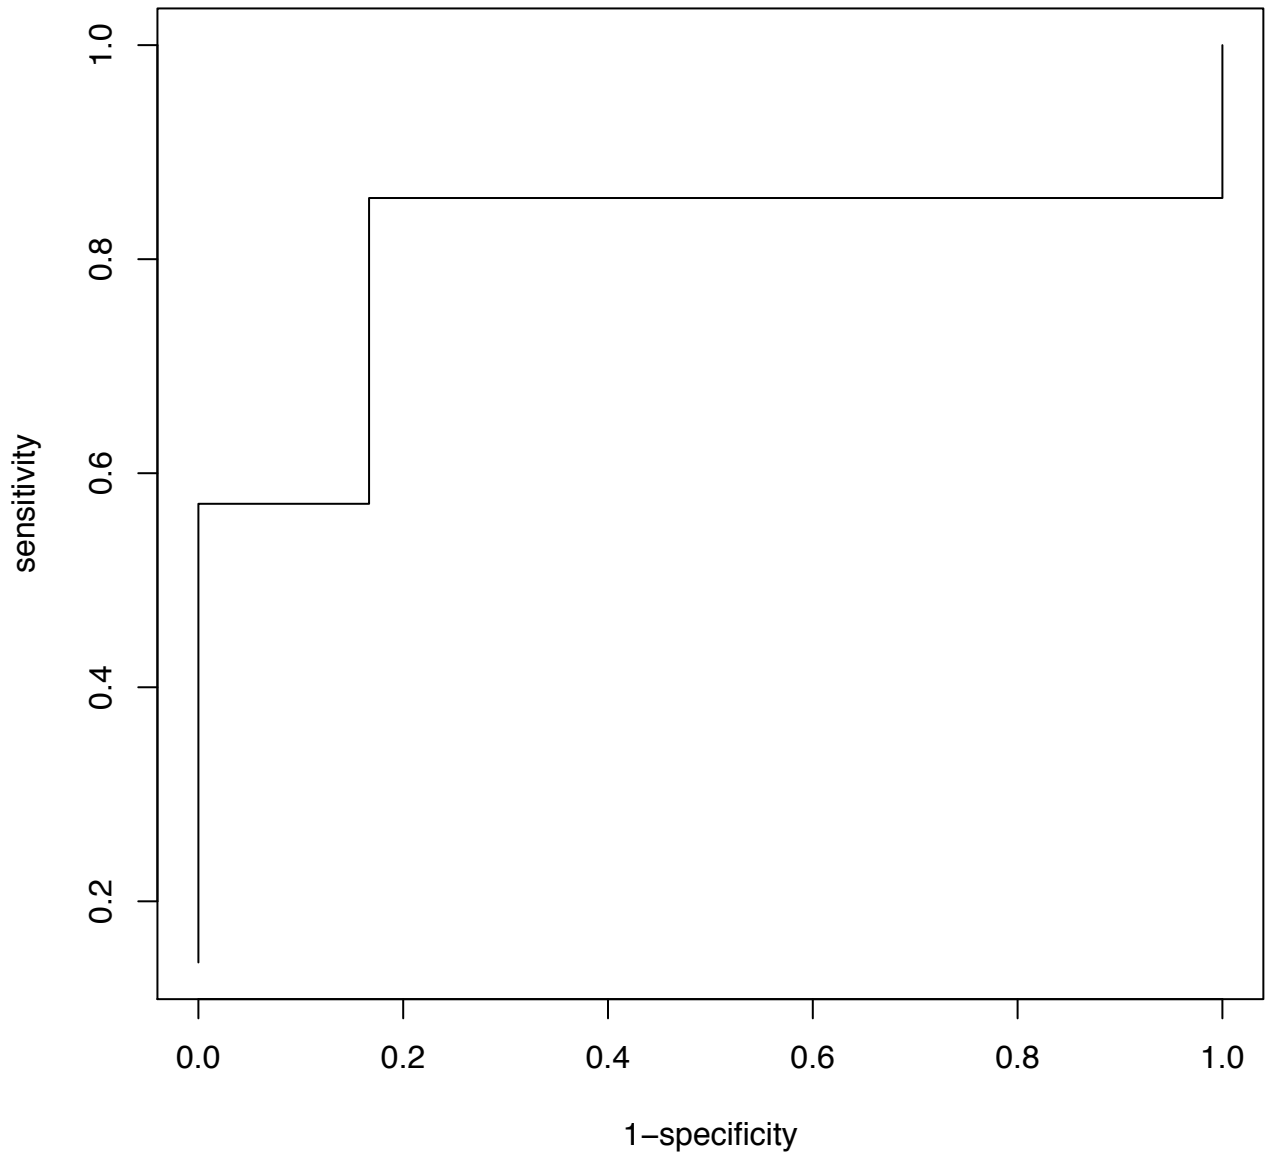

pam50: LumA vs. Normal . Number of peptides: NA  
ROC area = 0.83 p-value = 0.026

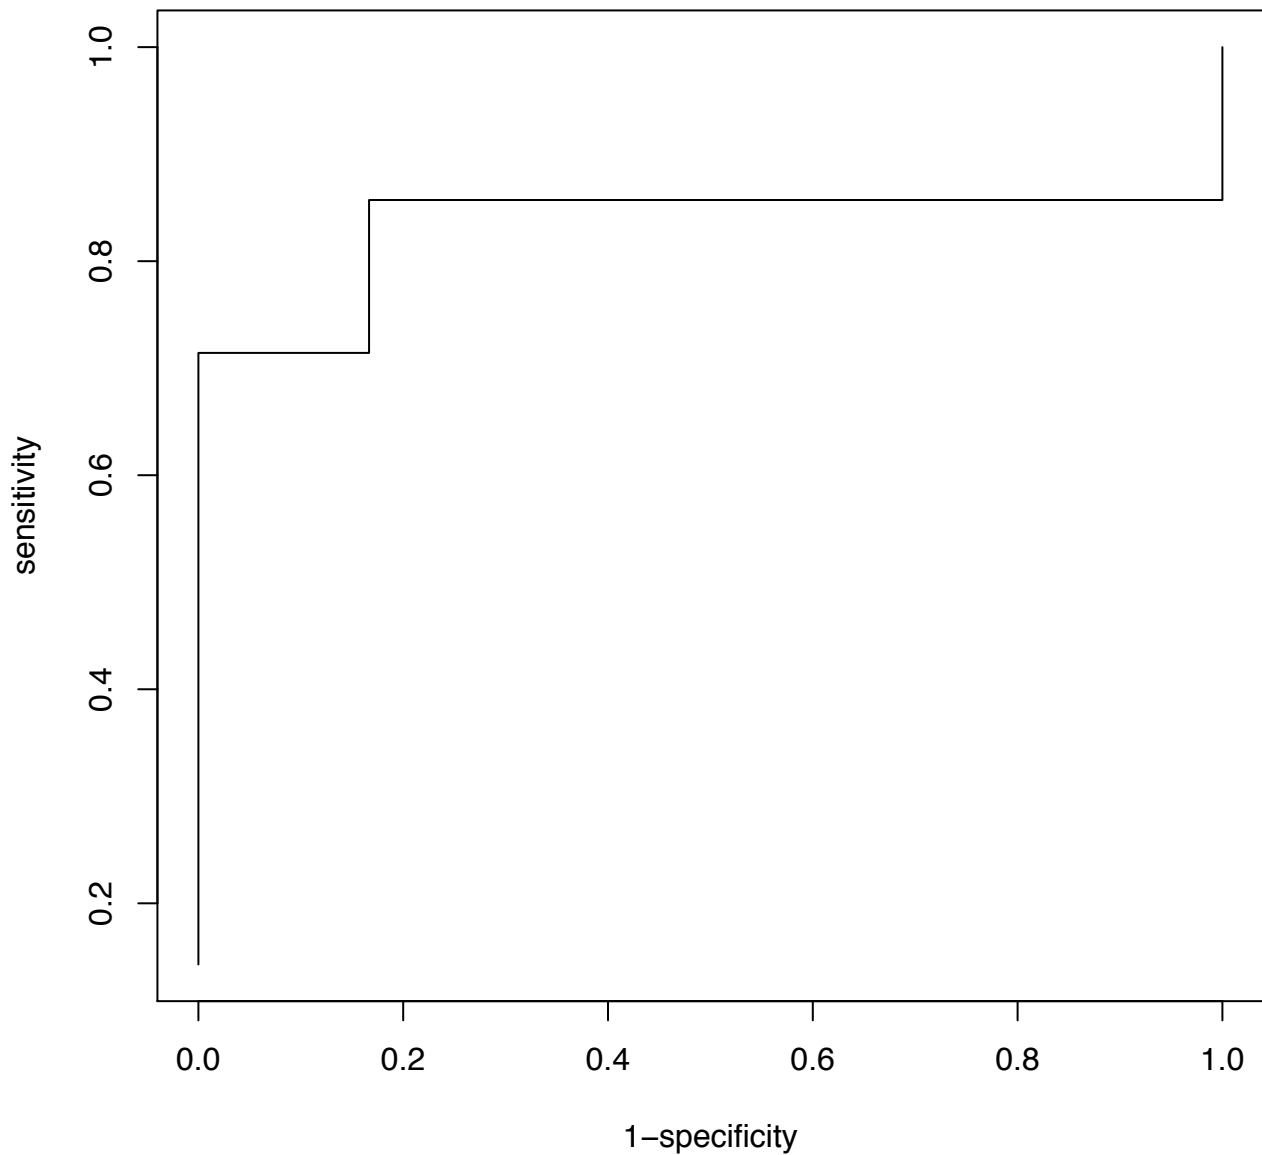

hu: LumA vs. Normal . Number of peptides: 20

ROC area = 0.64 p-value = 0.24

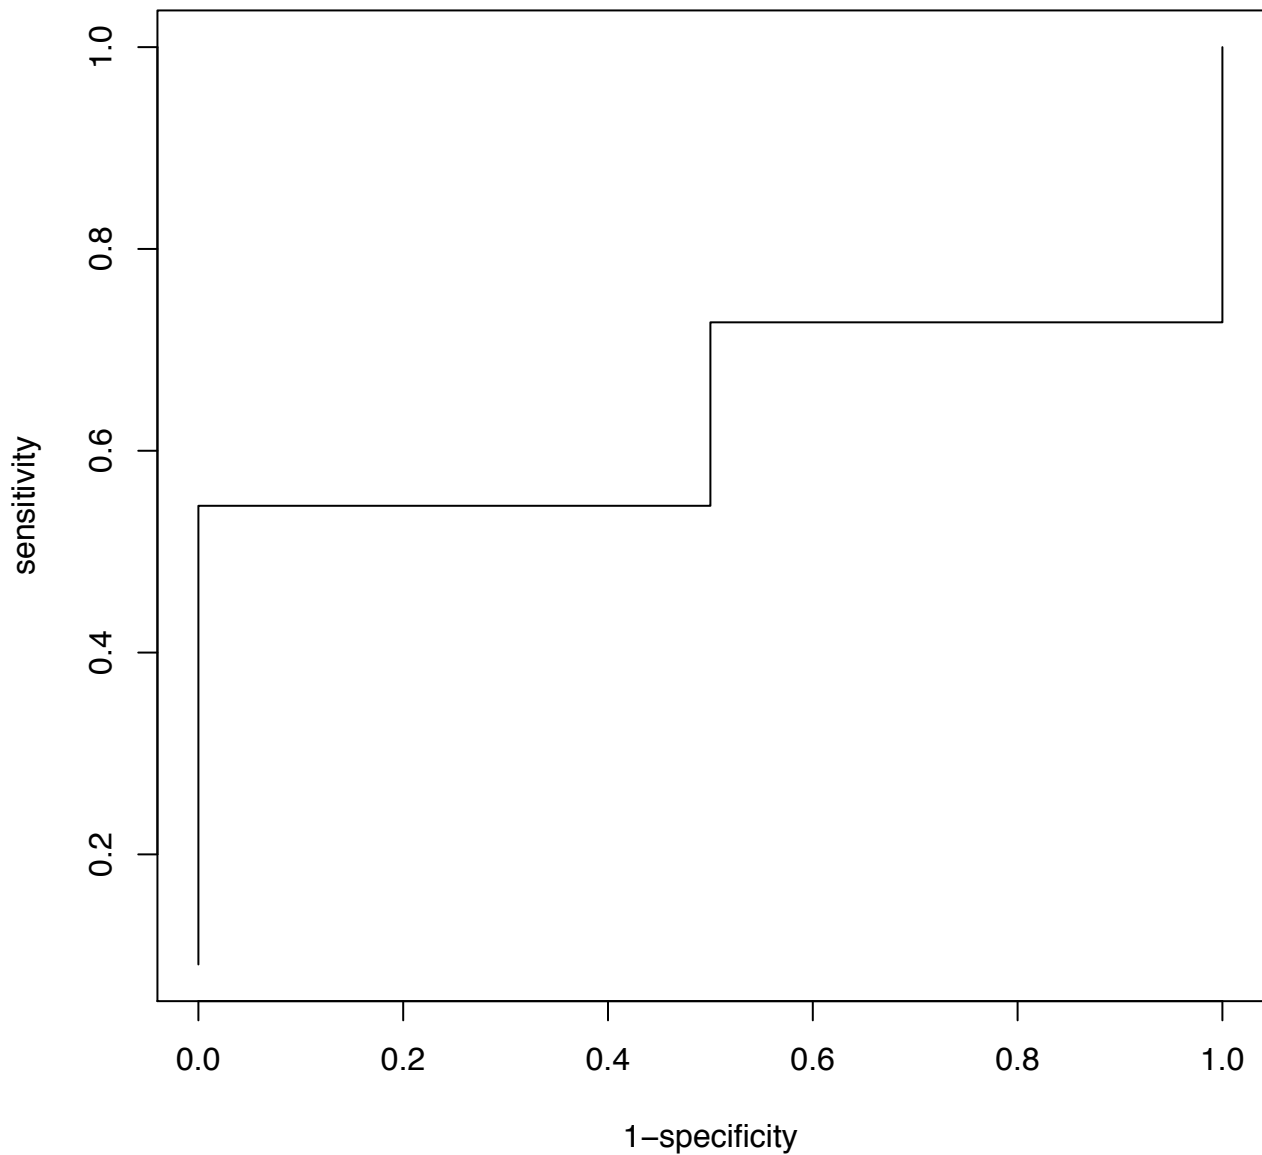

hu: LumA vs. Normal . Number of peptides: 30

ROC area = 0.75 p-value = 0.089

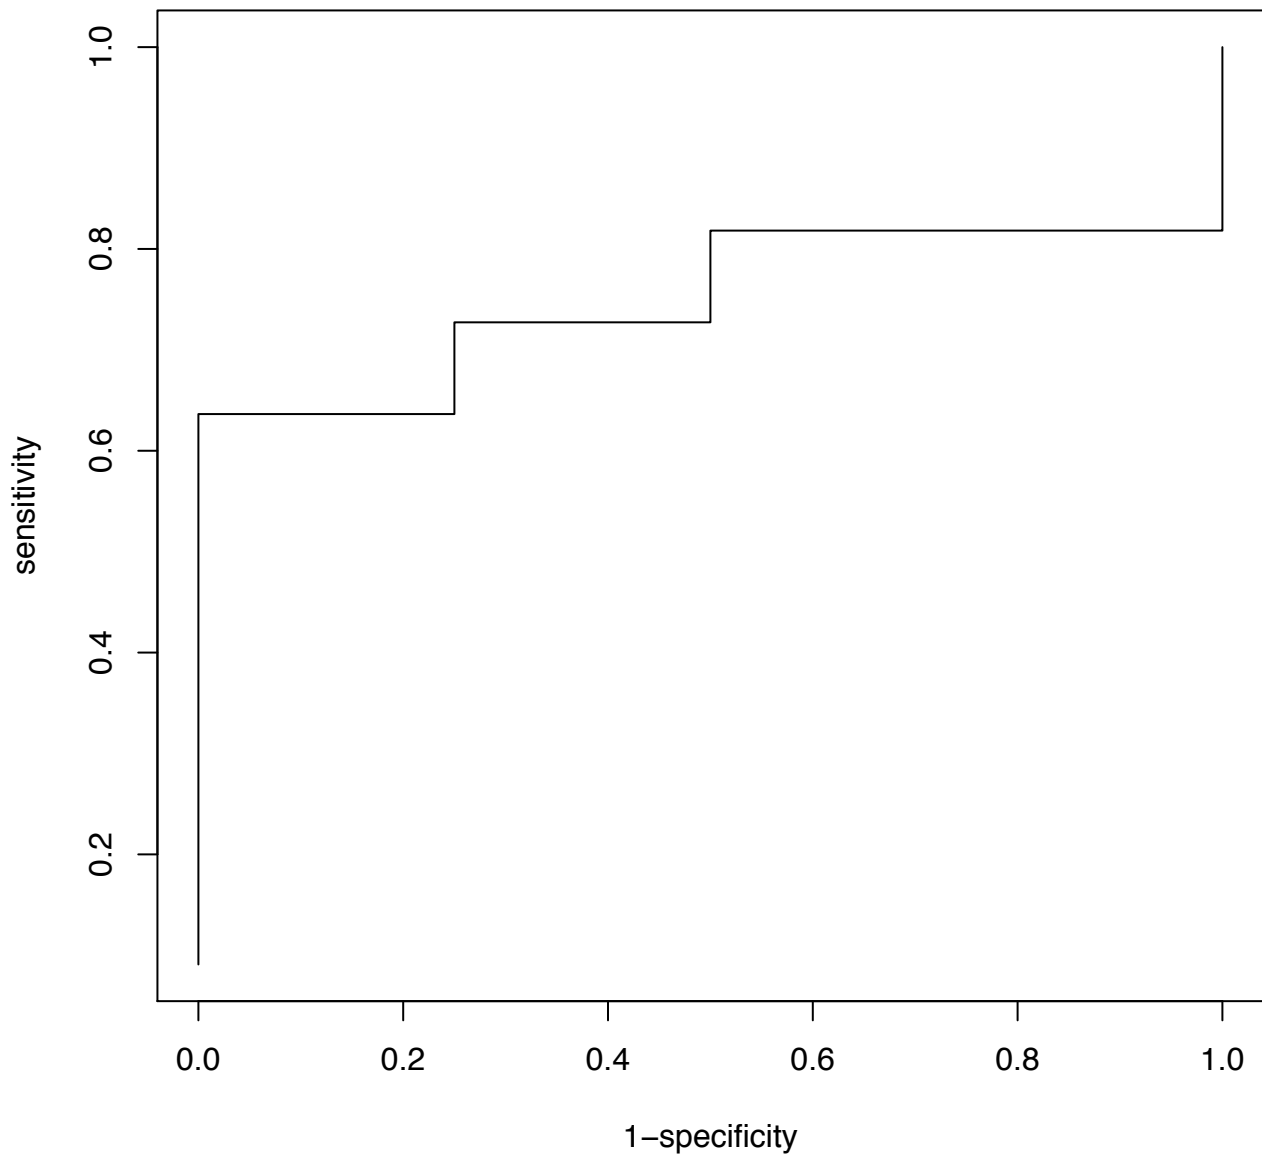

hu: LumA vs. Normal . Number of peptides: 40

ROC area = 0.82 p-value = 0.039

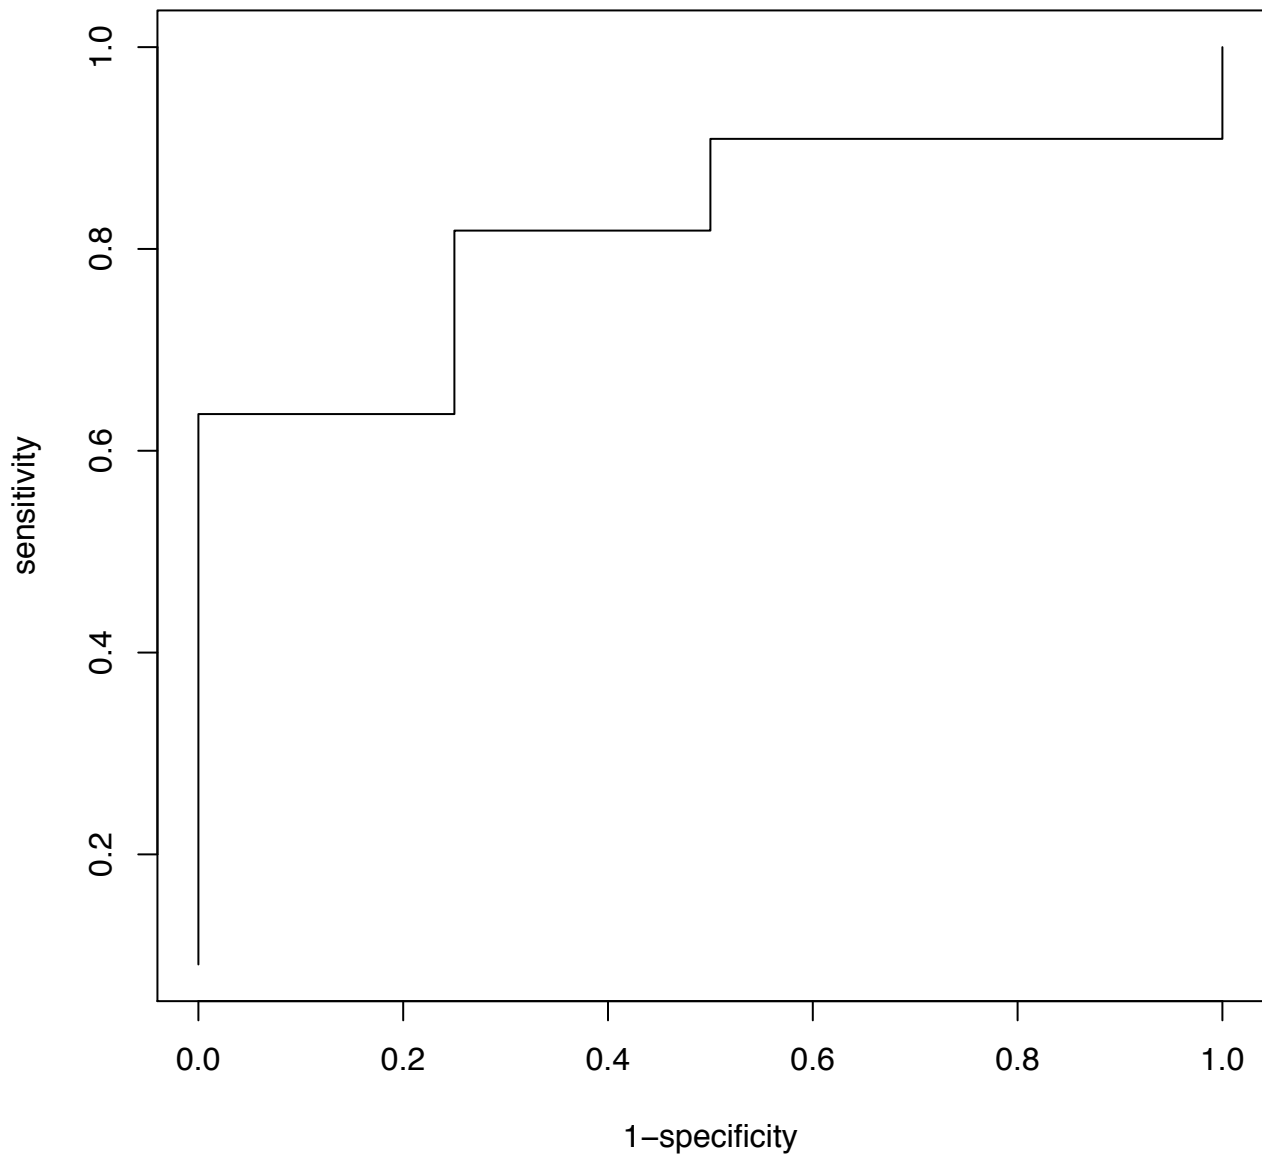

hu: LumA vs. Normal . Number of peptides: 100

ROC area = 0.89 p-value = 0.013

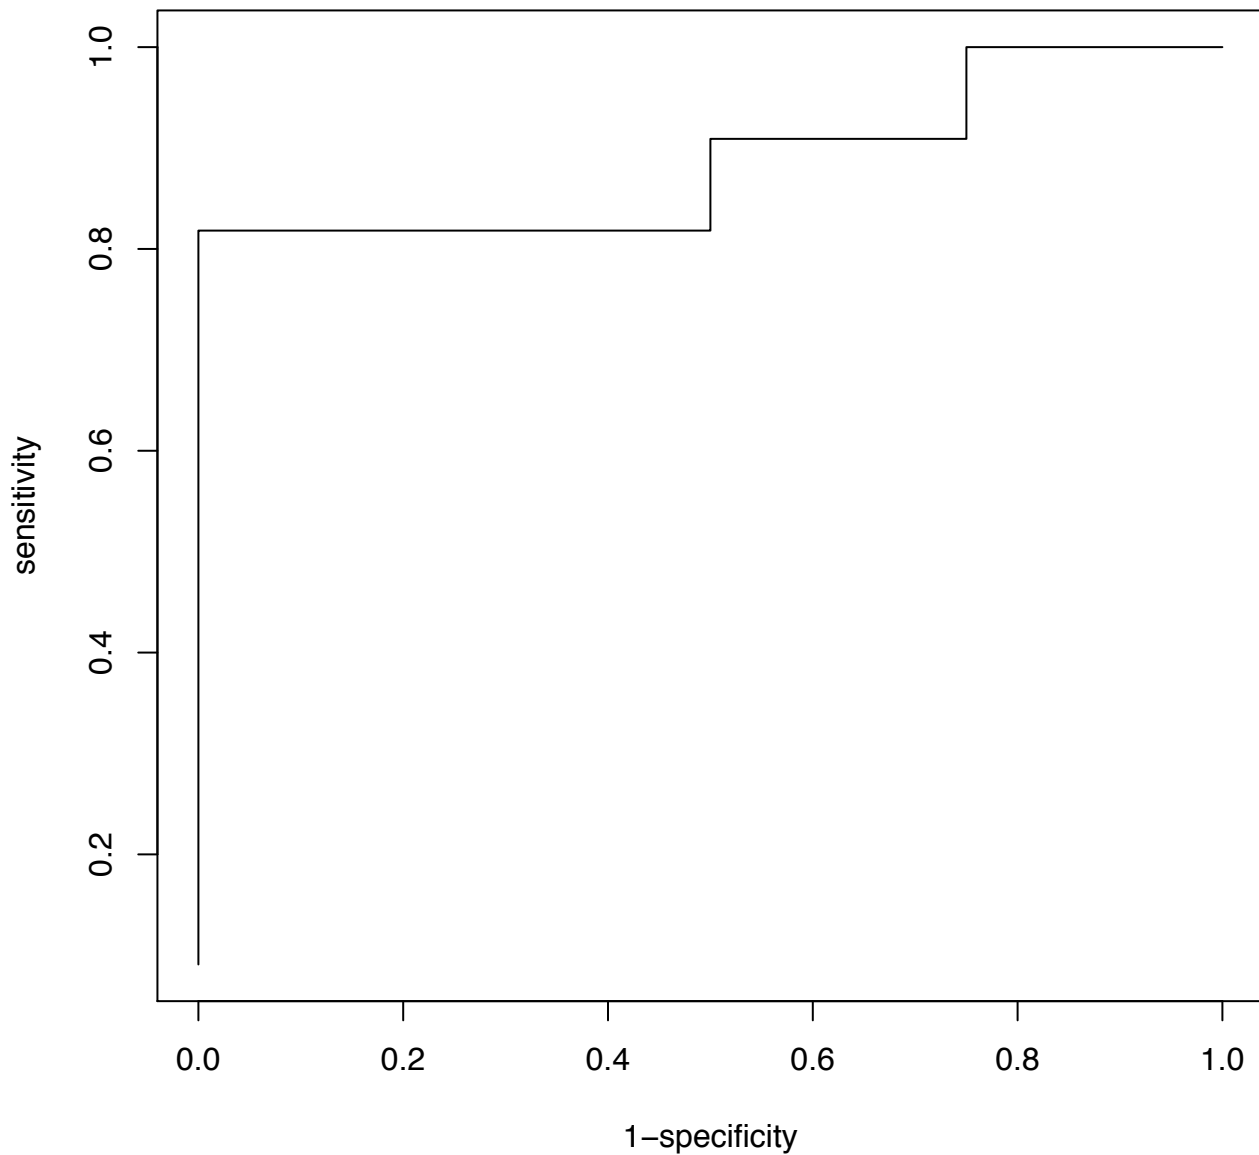

hu: LumA vs. Normal . Number of peptides: NA  
ROC area = 0.84 p-value = 0.028

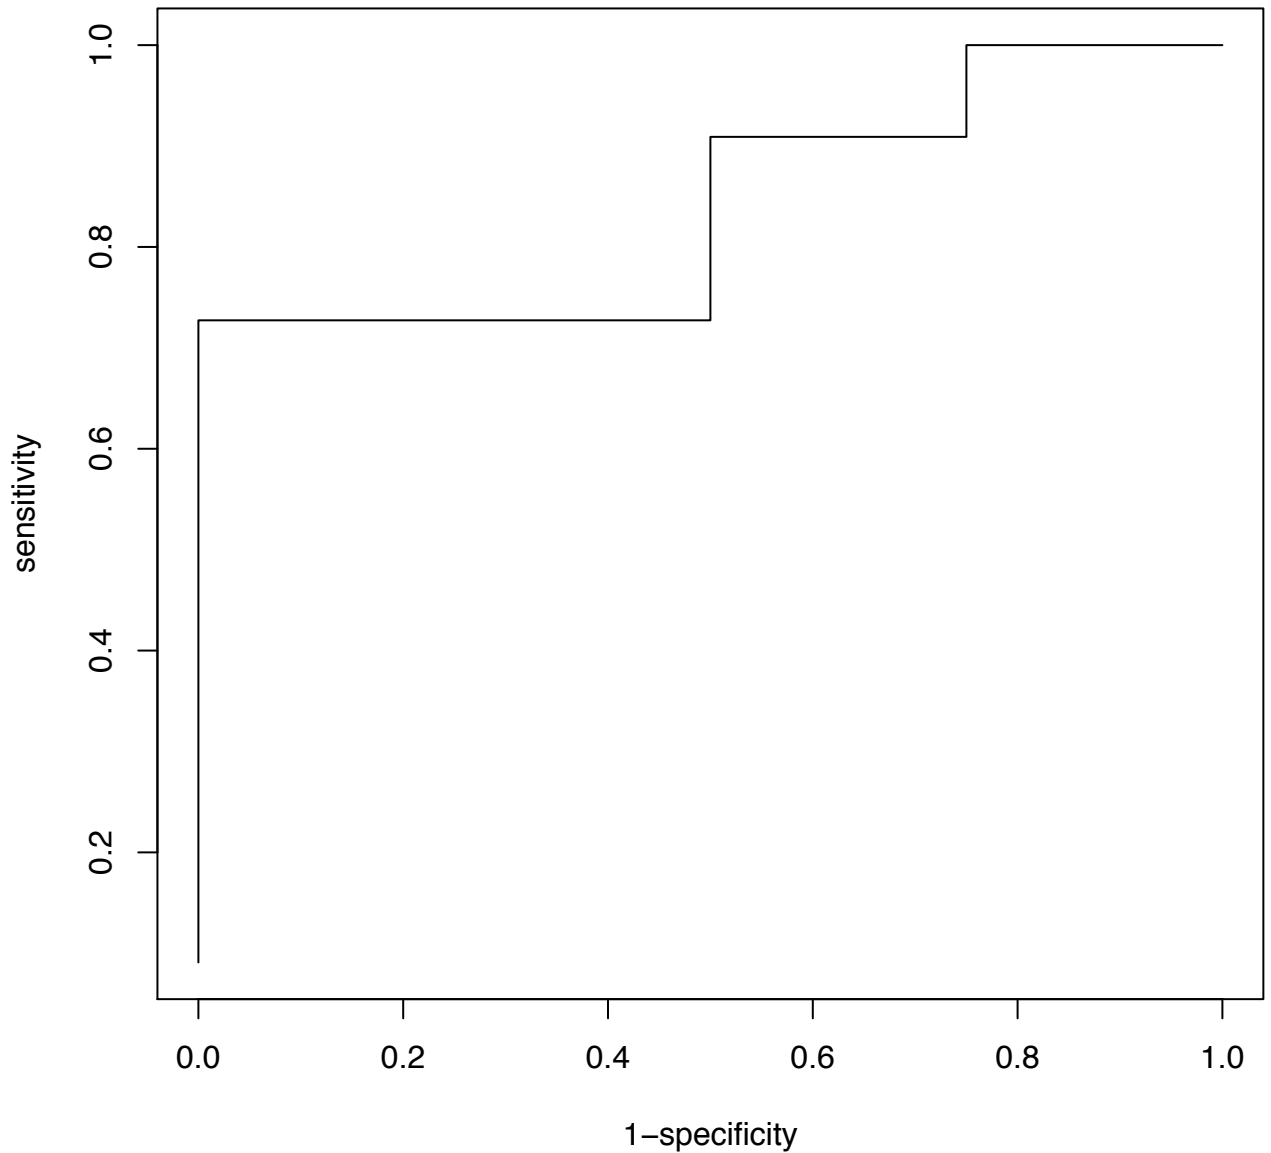

sortie: LumB vs. Normal . Number of peptides: 20

ROC area = 0.56 p-value = 0.44





sortie: LumB vs. Normal . Number of peptides: 30

ROC area = 0.75 p-value = 0.17

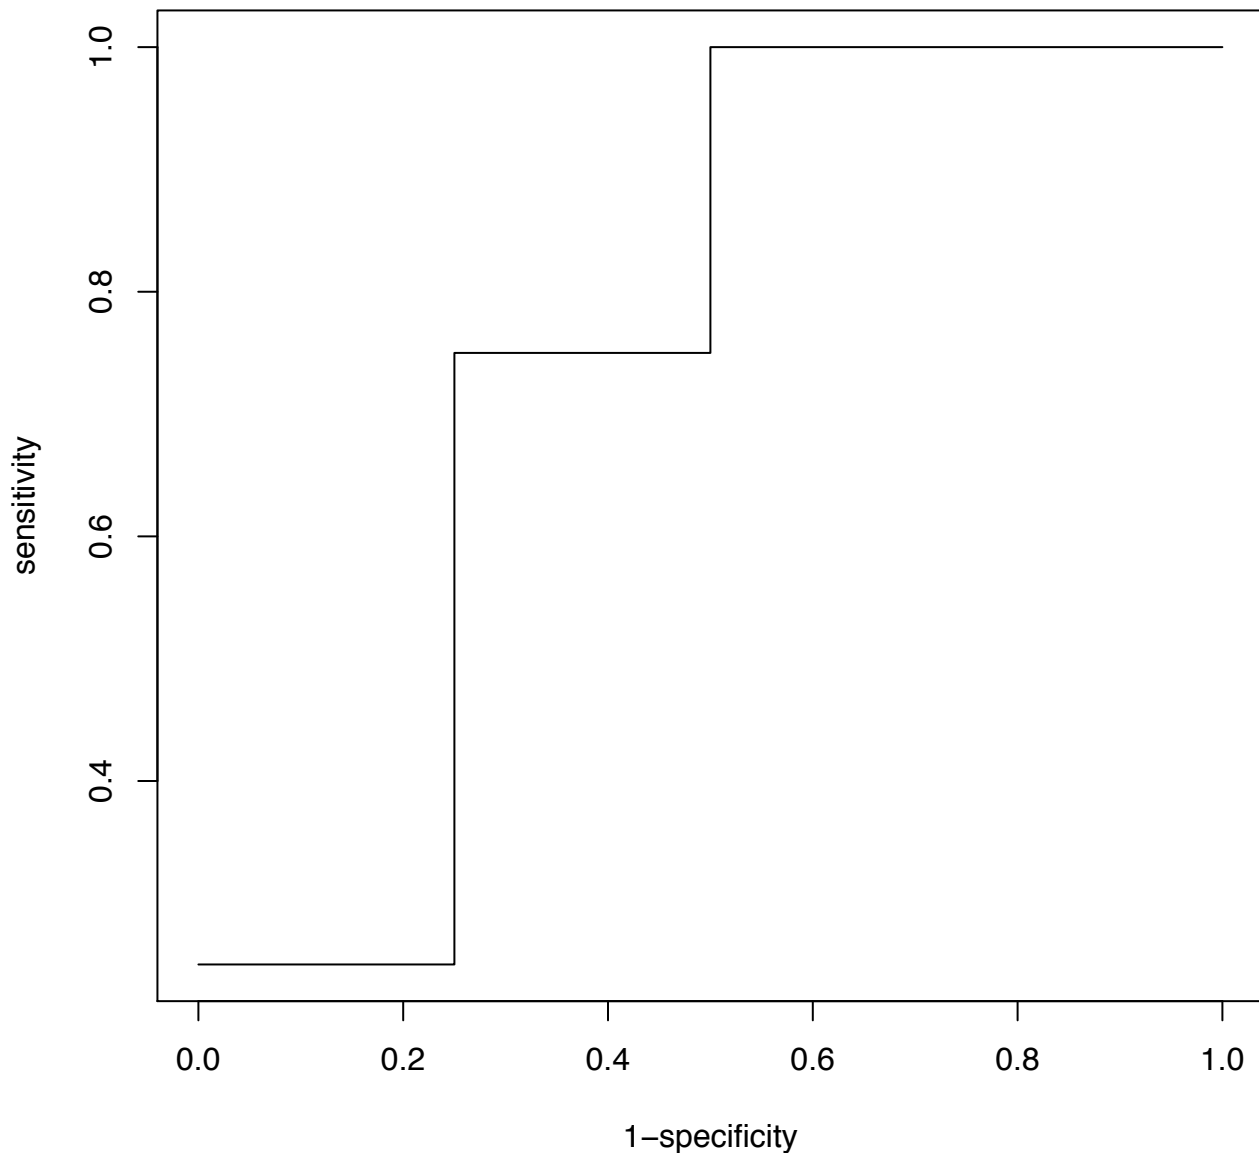

sortie: LumB vs. Normal . Number of peptides: 40

ROC area = 0.81 p-value = 0.1

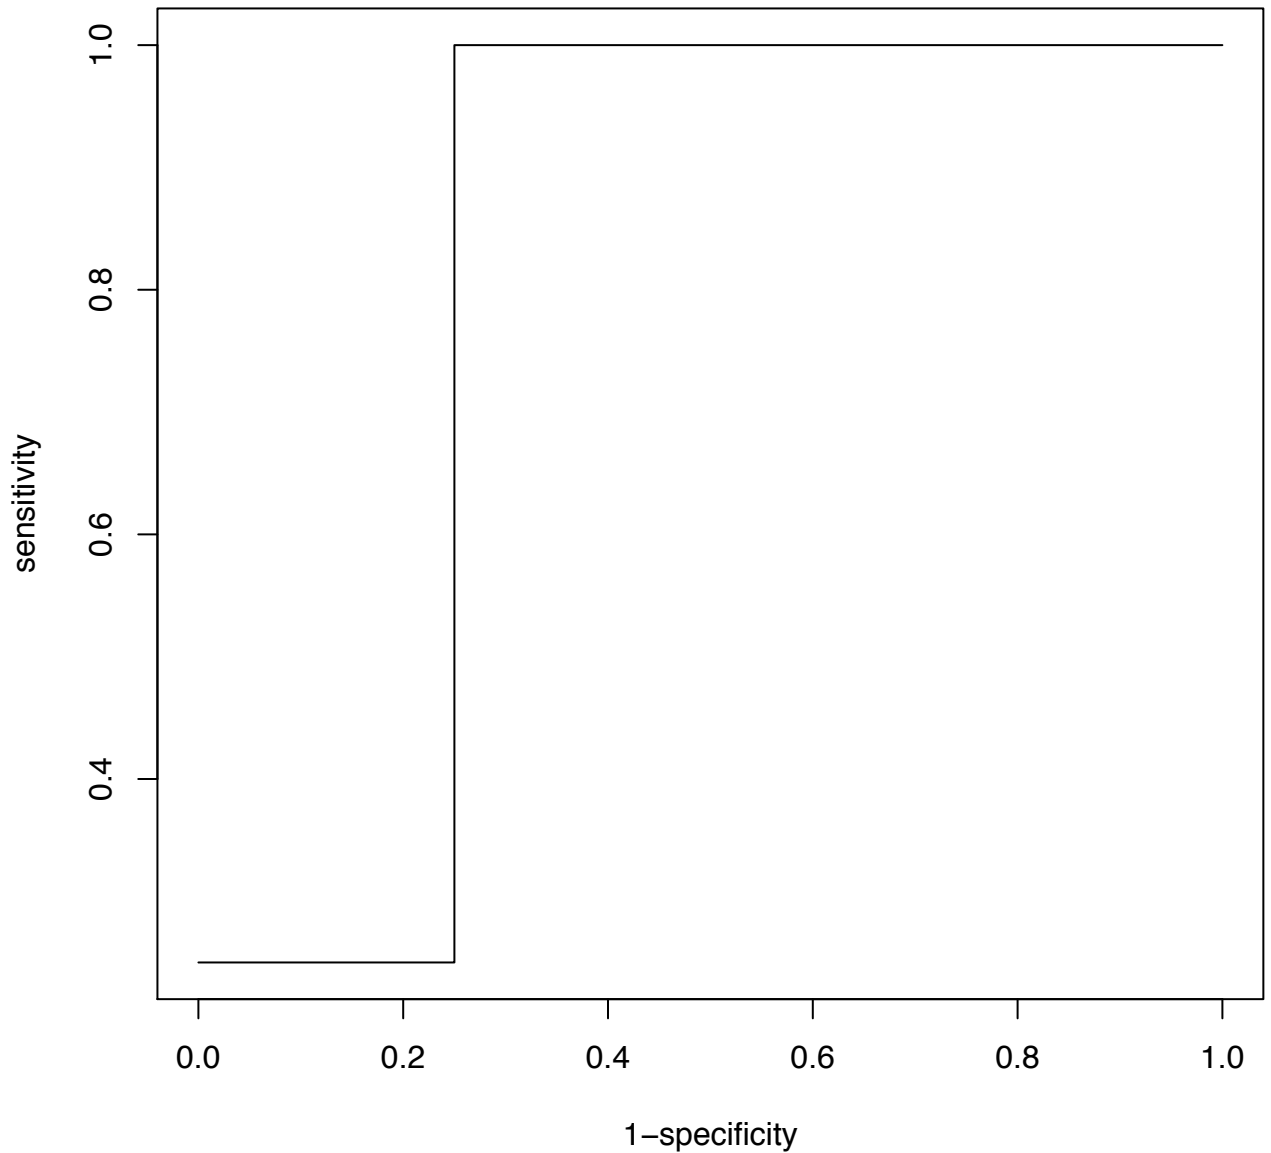

sorlie: LumB vs. Normal . Number of peptides: 100

ROC area = 0.75 p-value = 0.17

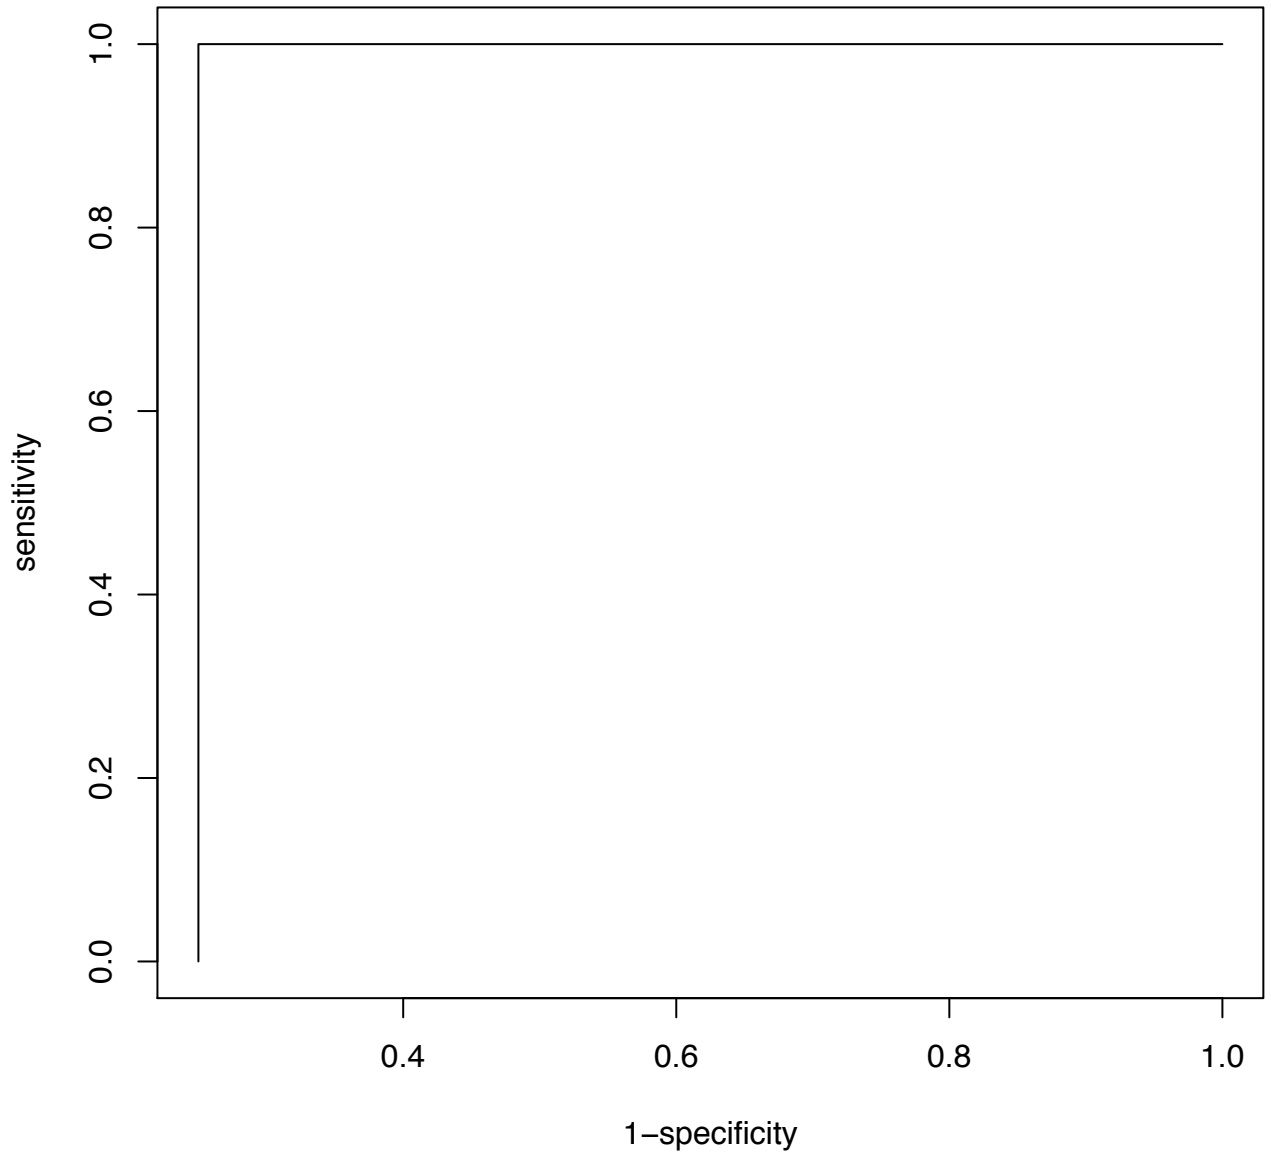

sorlie: LumB vs. Normal . Number of peptides: NA  
ROC area = 0.75 p-value = 0.17

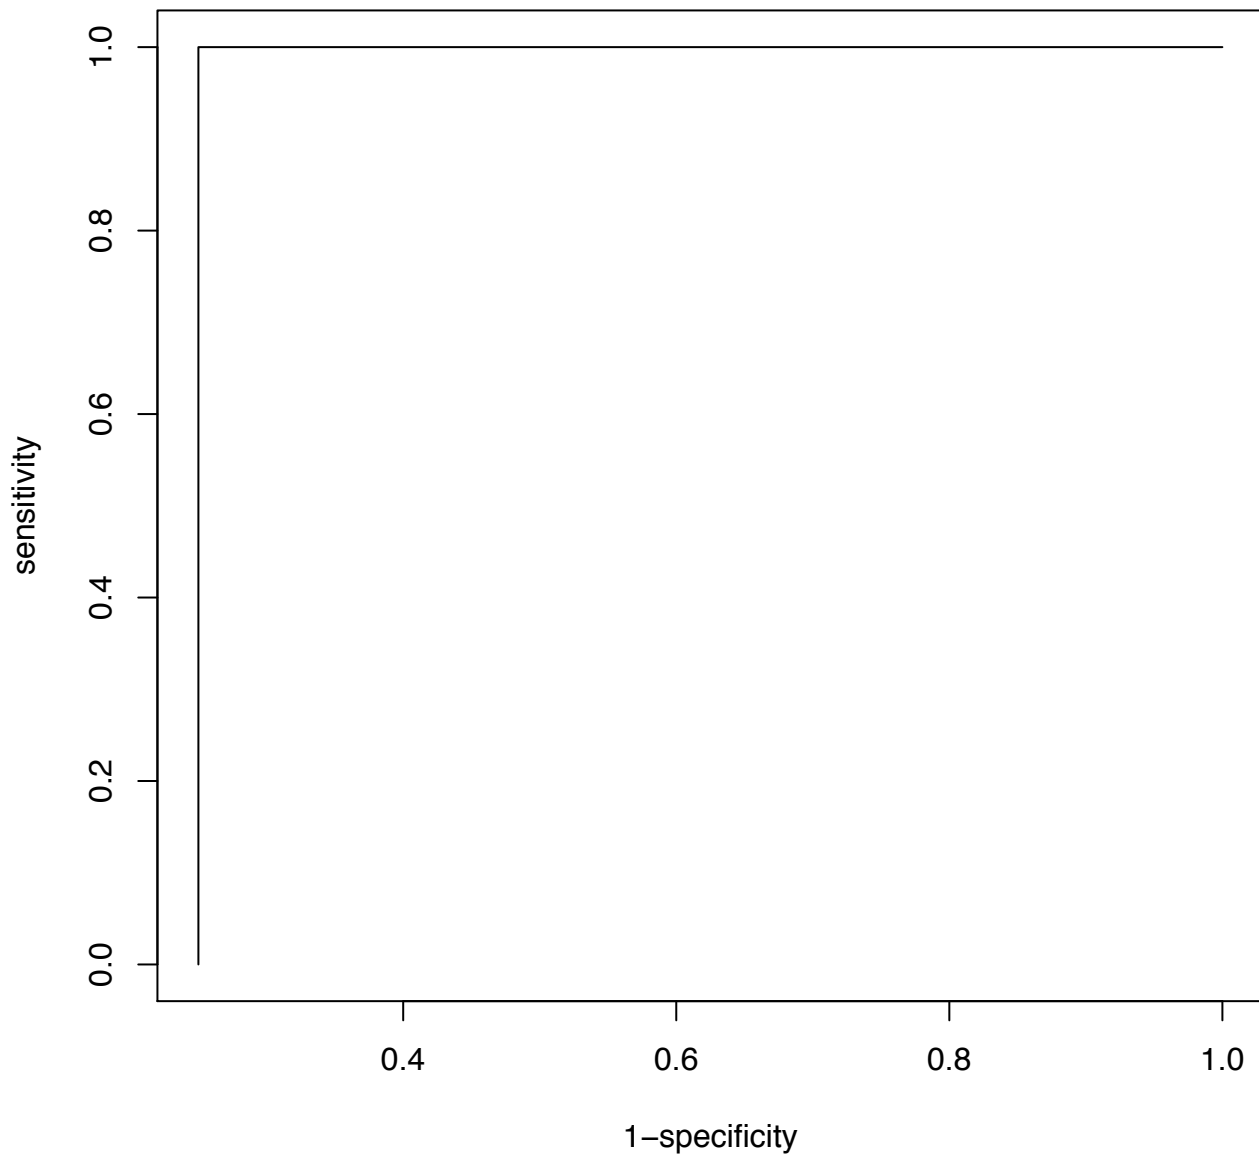

pam50: LumB vs. Normal . Number of peptides: 20  
ROC area = 0.81 p-value = 0.037

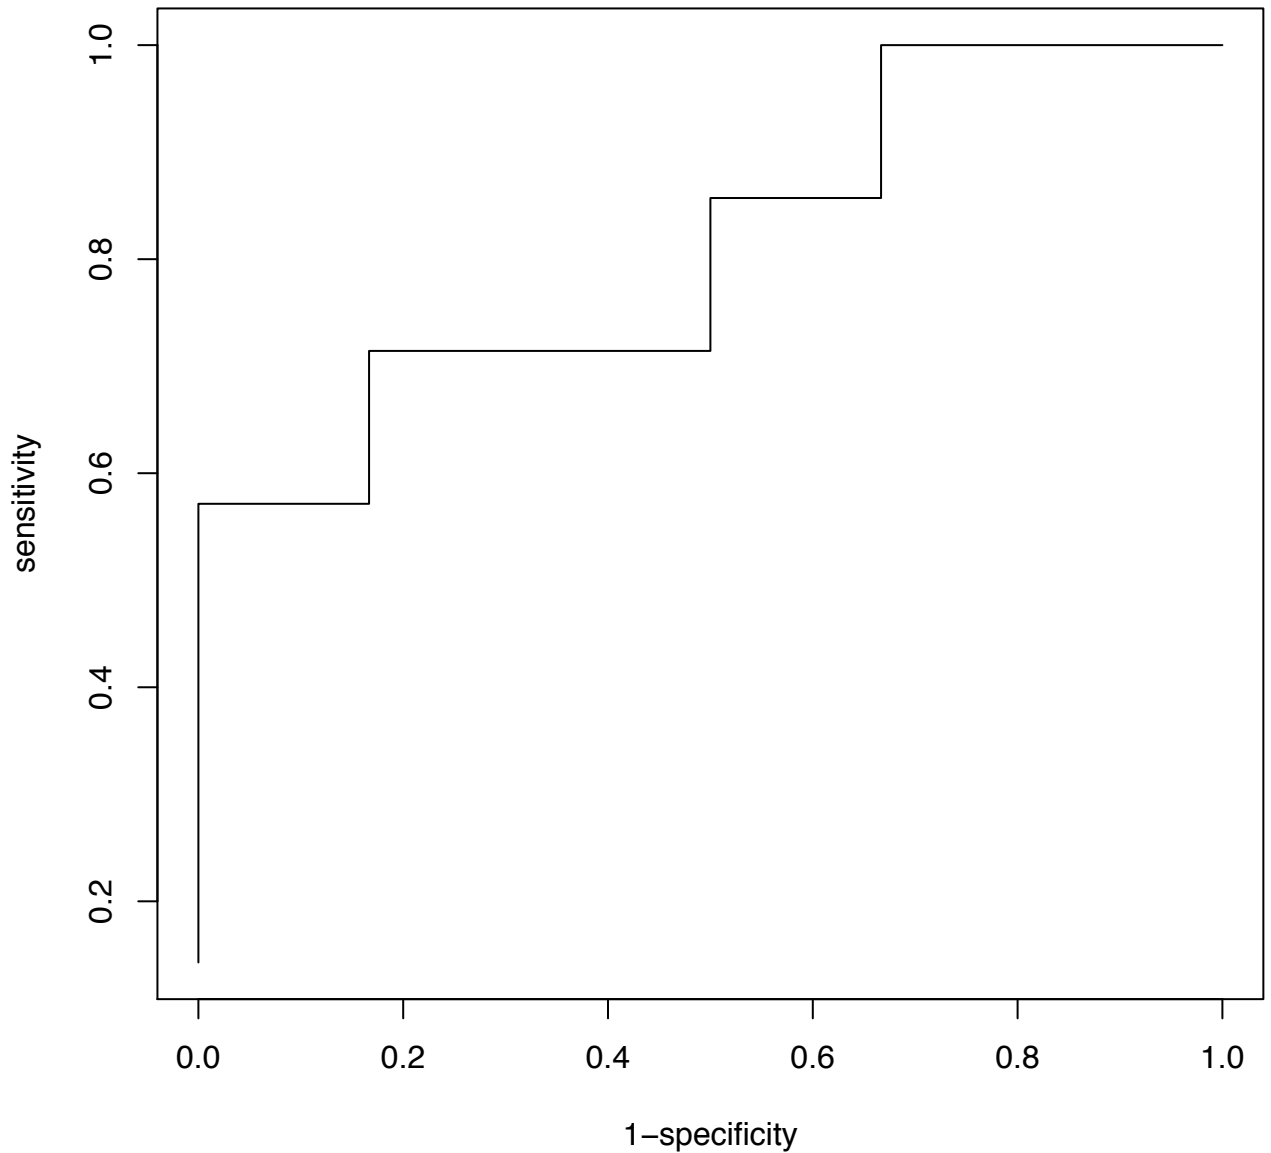

pam50: LumB vs. Normal . Number of peptides: 30

ROC area = 0.69 p-value = 0.15

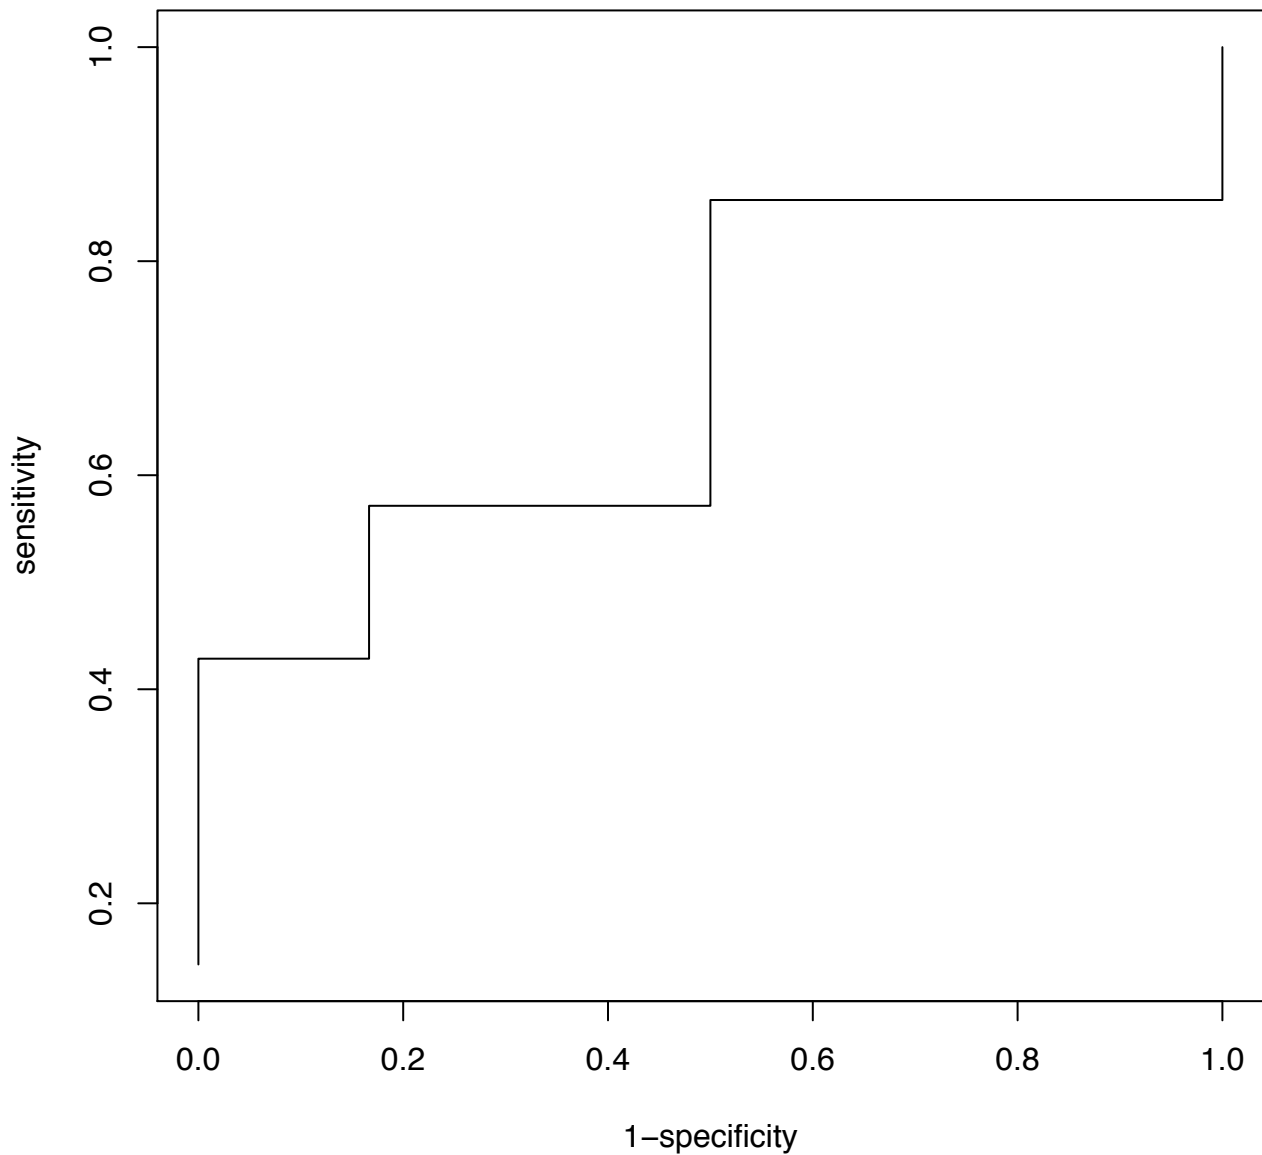

pam50: LumB vs. Normal . Number of peptides: 40  
ROC area = 0.81 p-value = 0.037

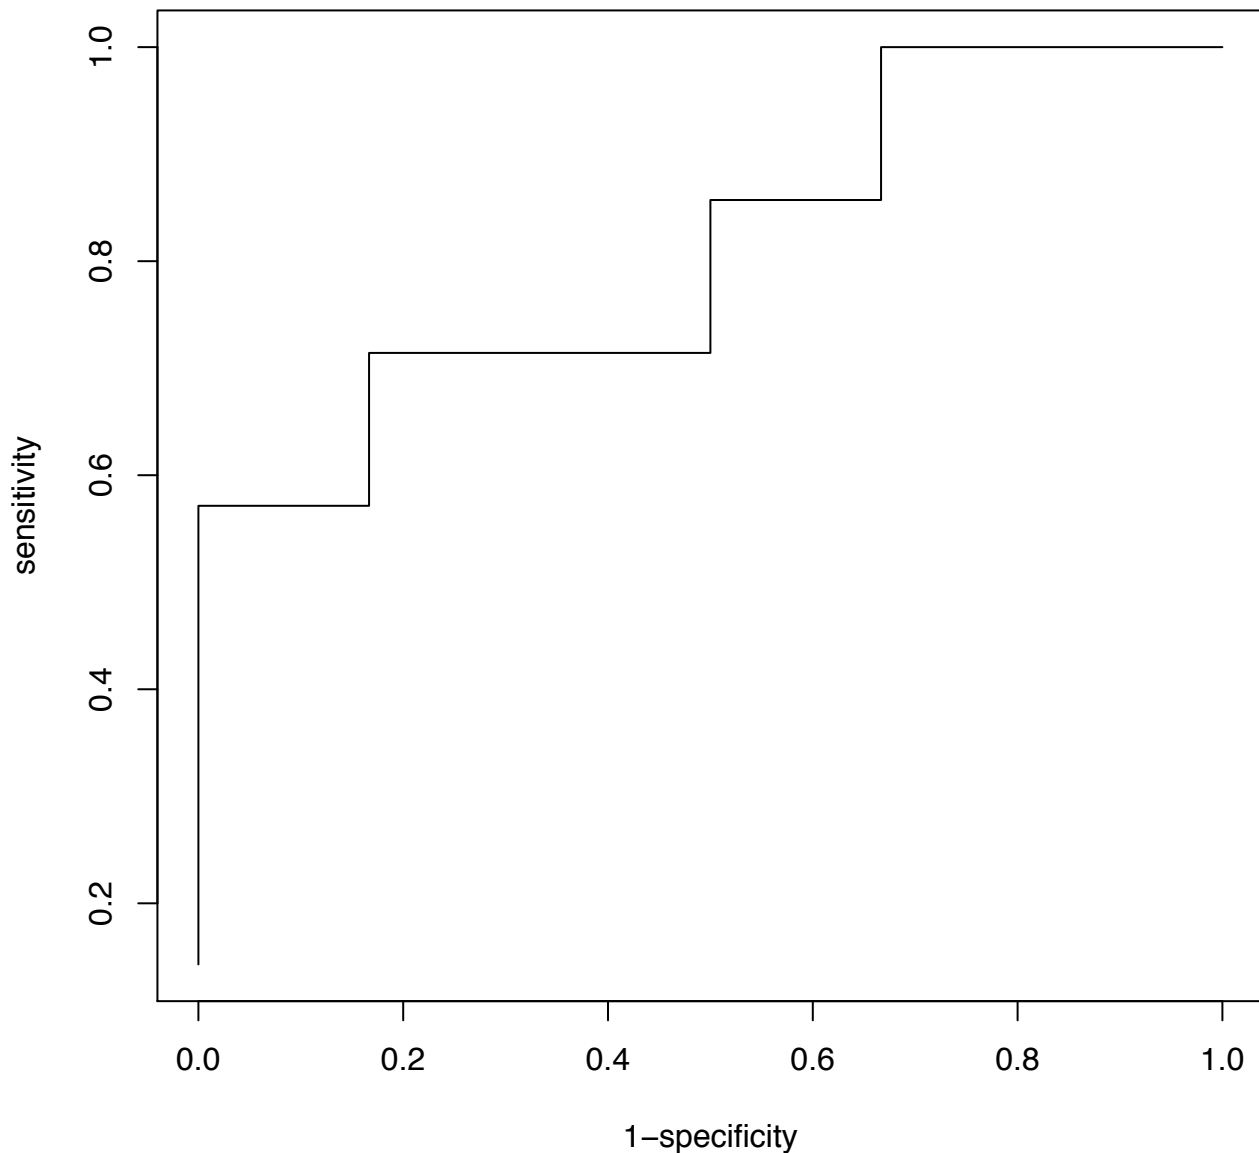

pam50: LumB vs. Normal . Number of peptides: 100

ROC area = 0.79 p-value = 0.051

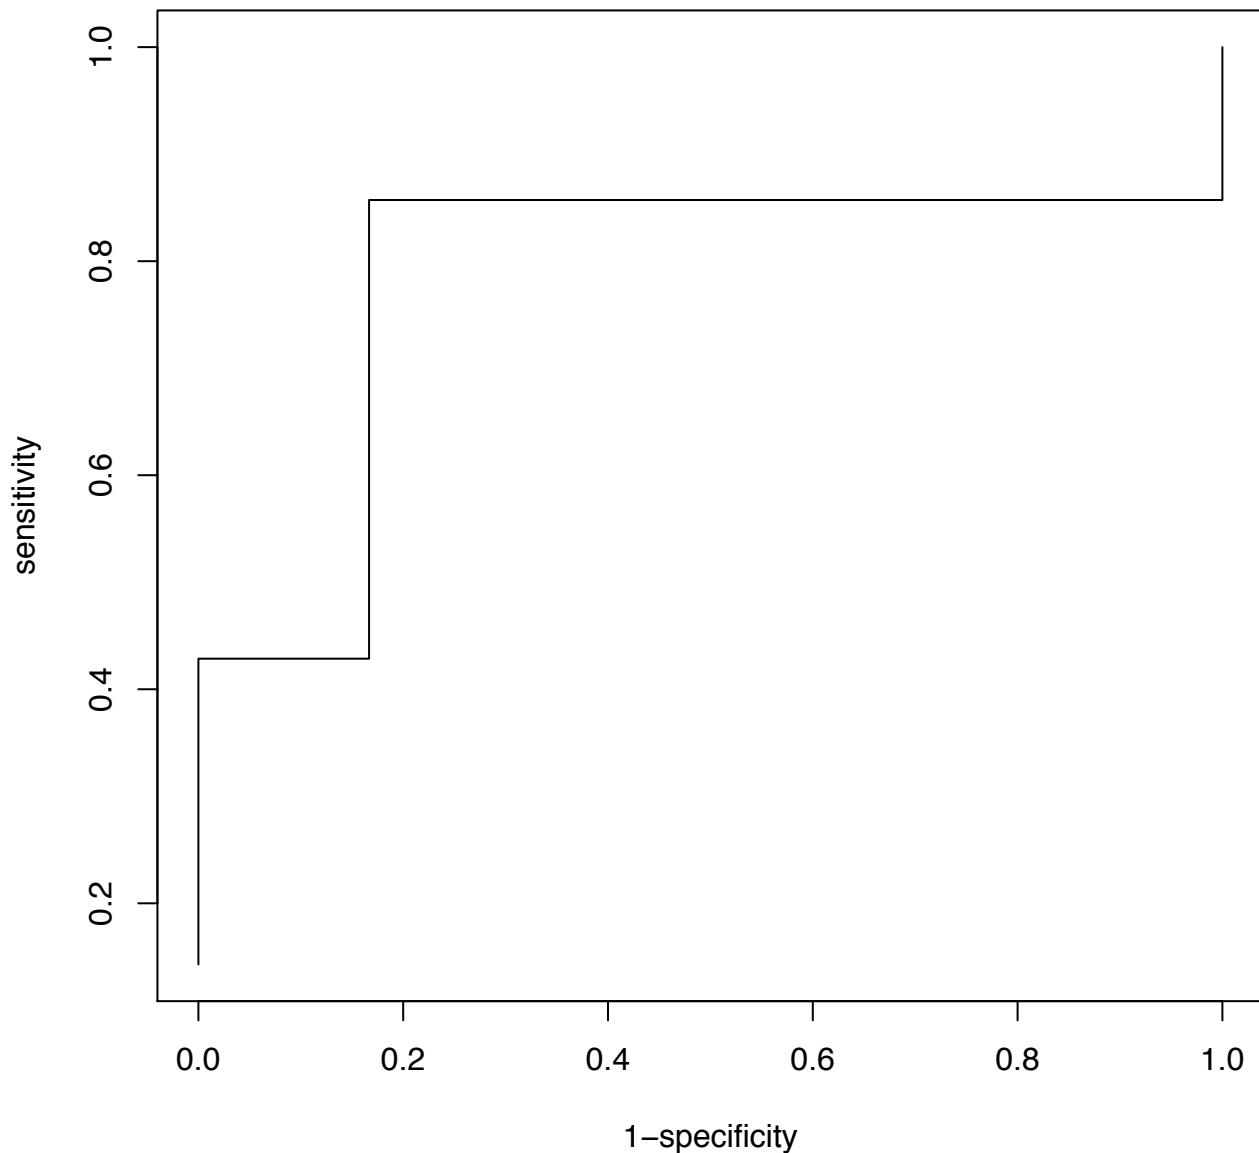



pam50: LumB vs. Normal . Number of peptides: NA  
ROC area = 0.83 p-value = 0.026

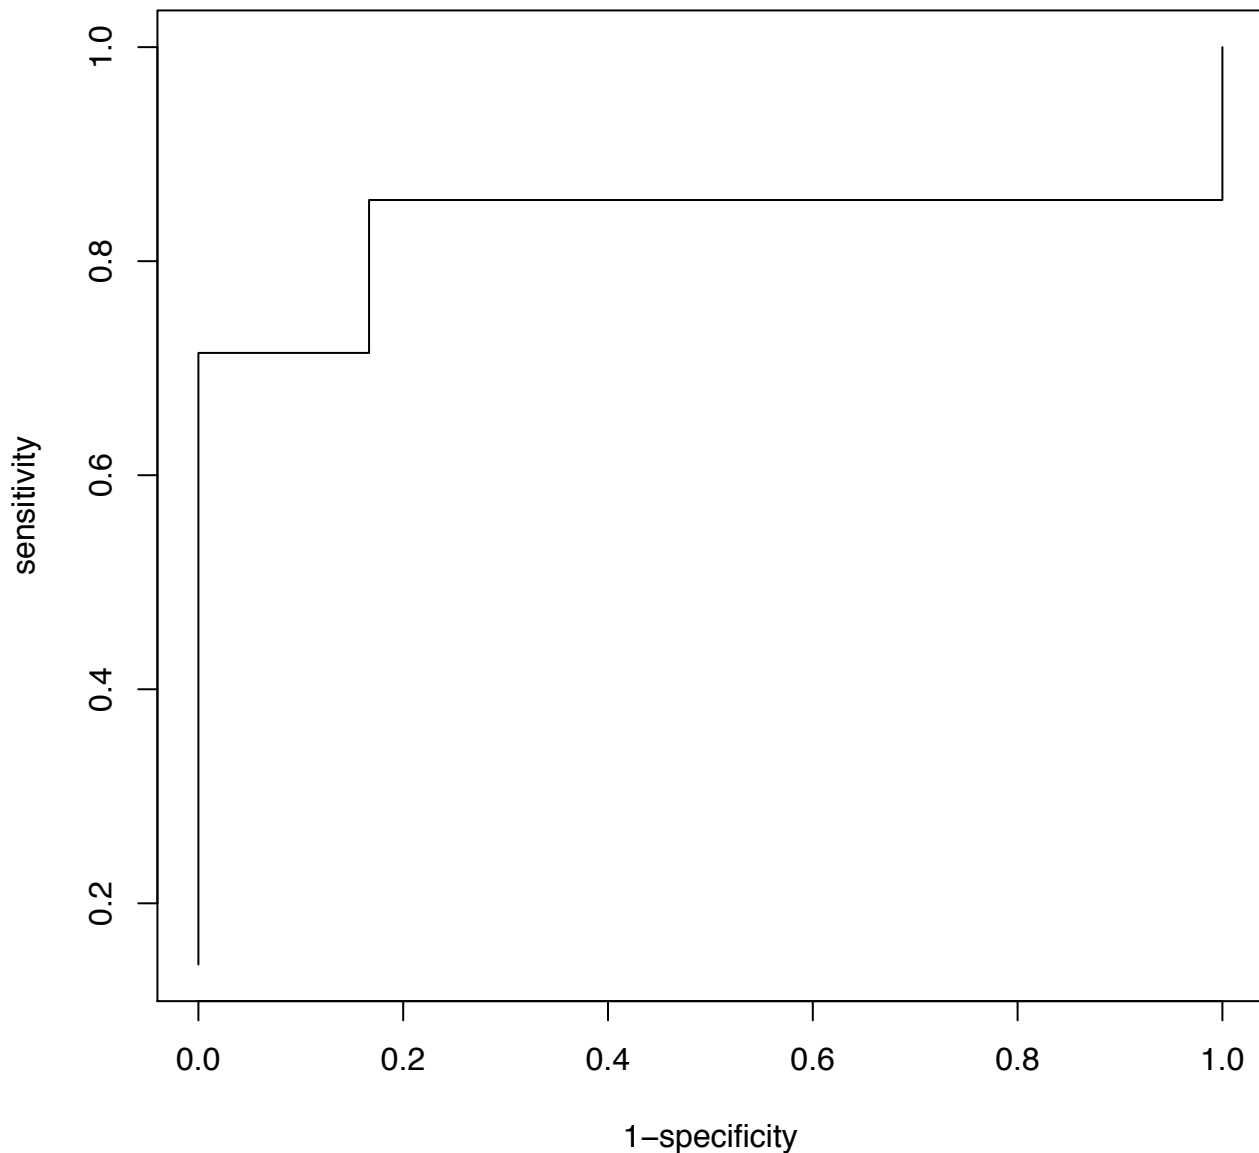

hu: LumB vs. Normal . Number of peptides: 20

ROC area = 0.81 p-value = 0.1

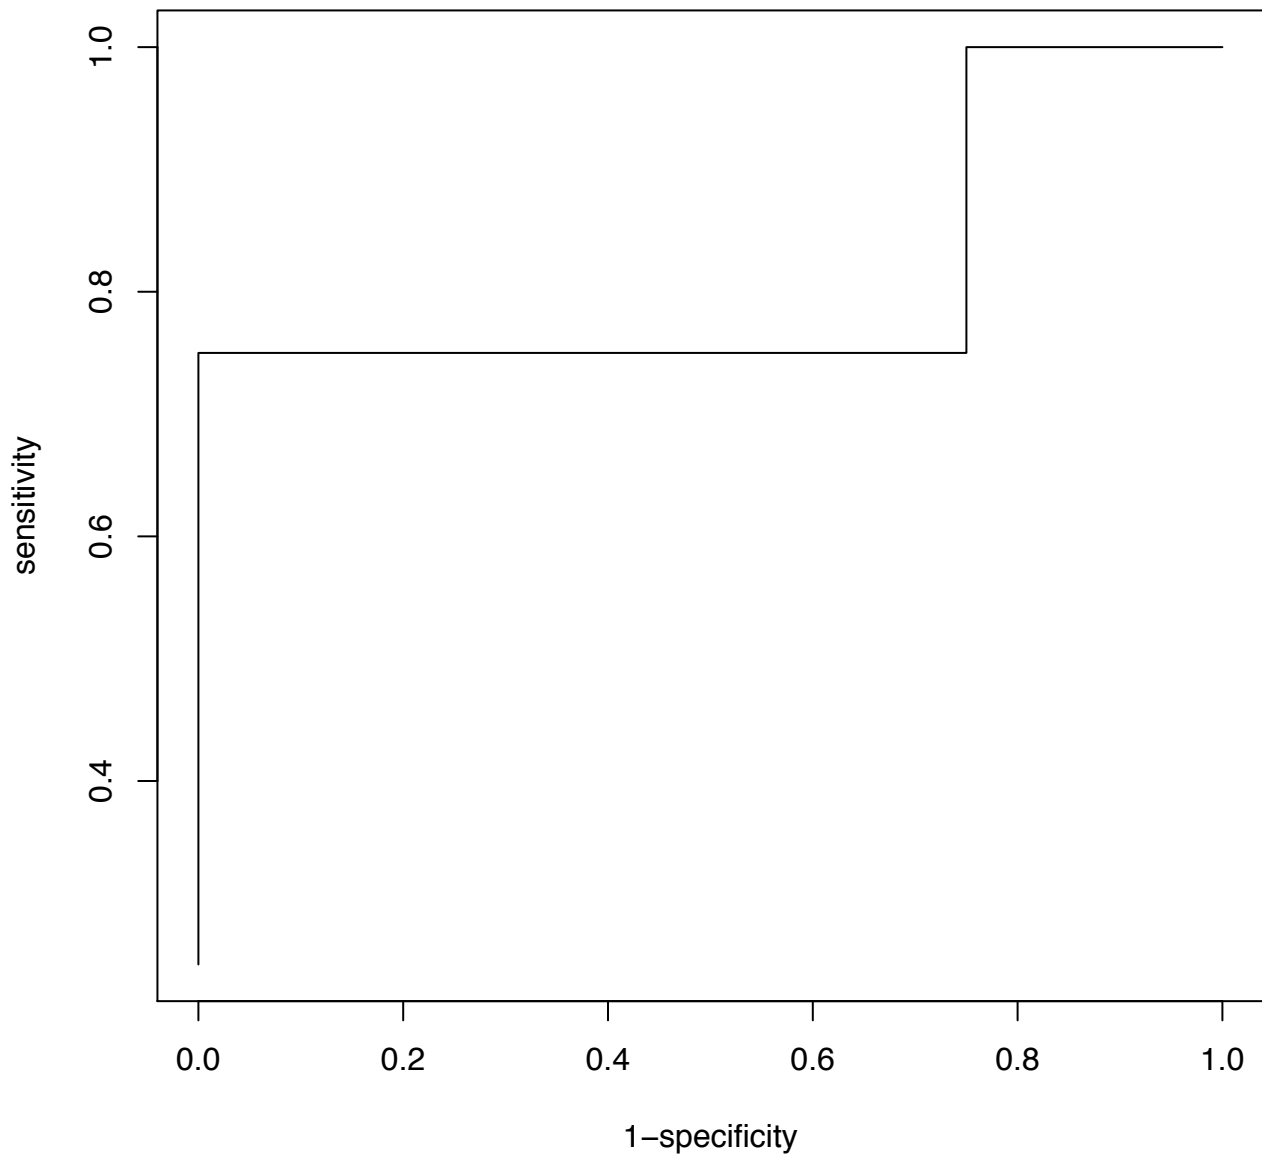

hu: LumB vs. Normal . Number of peptides: 30

ROC area = 0.81 p-value = 0.1

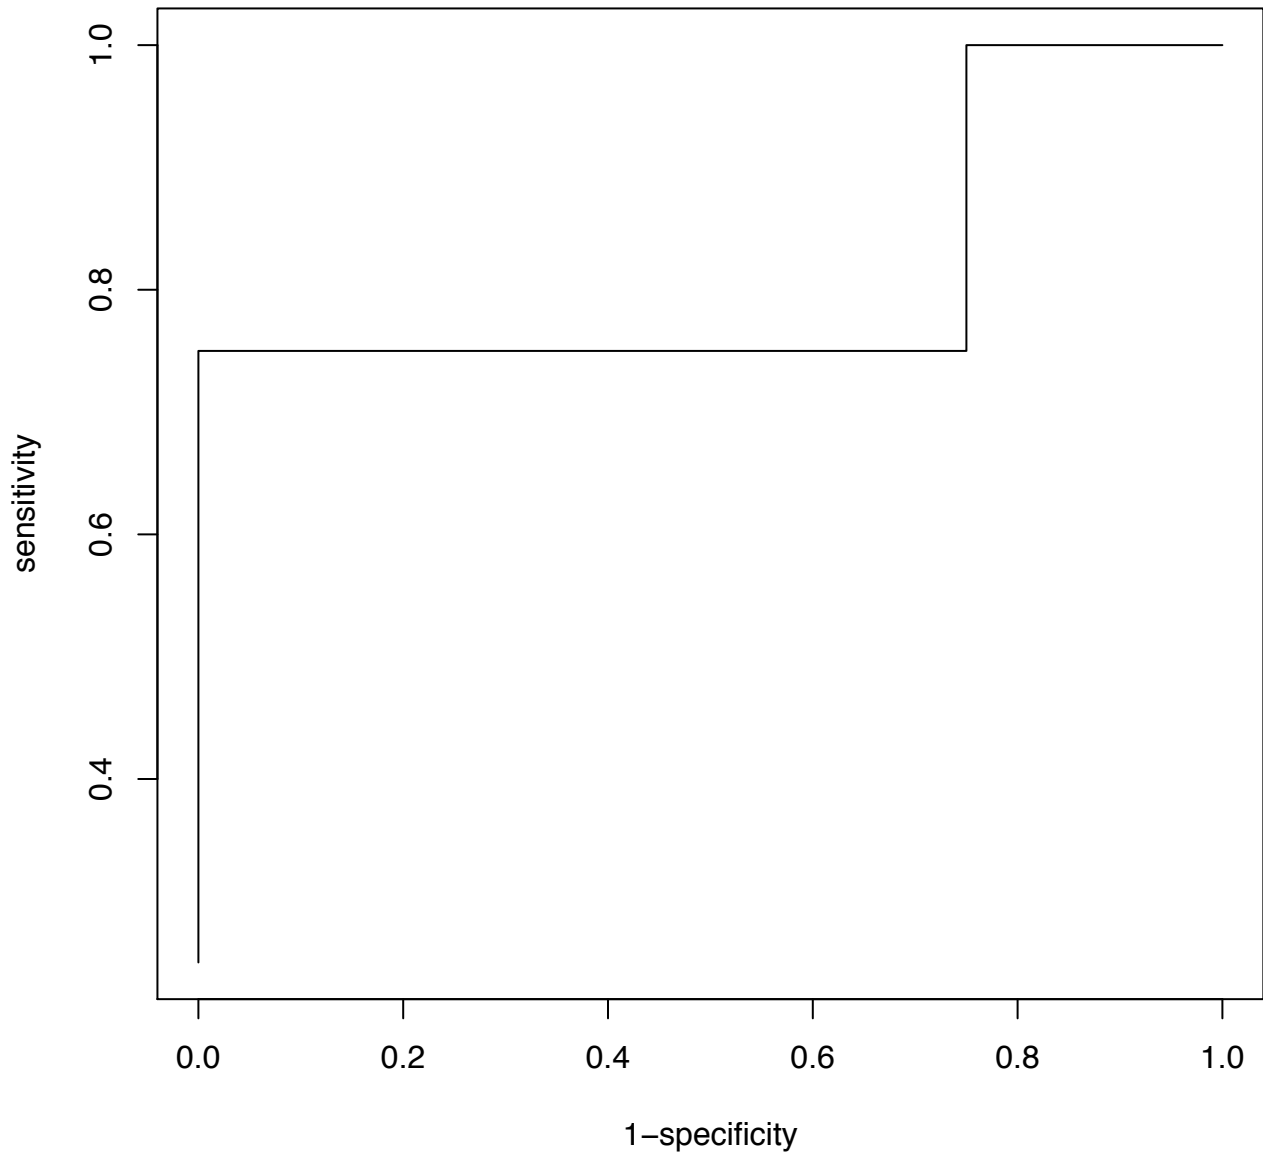

hu: LumB vs. Normal . Number of peptides: 40

ROC area = 0.81 p-value = 0.1



hu: LumB vs. Normal . Number of peptides: 100

ROC area = 0.75 p-value = 0.17

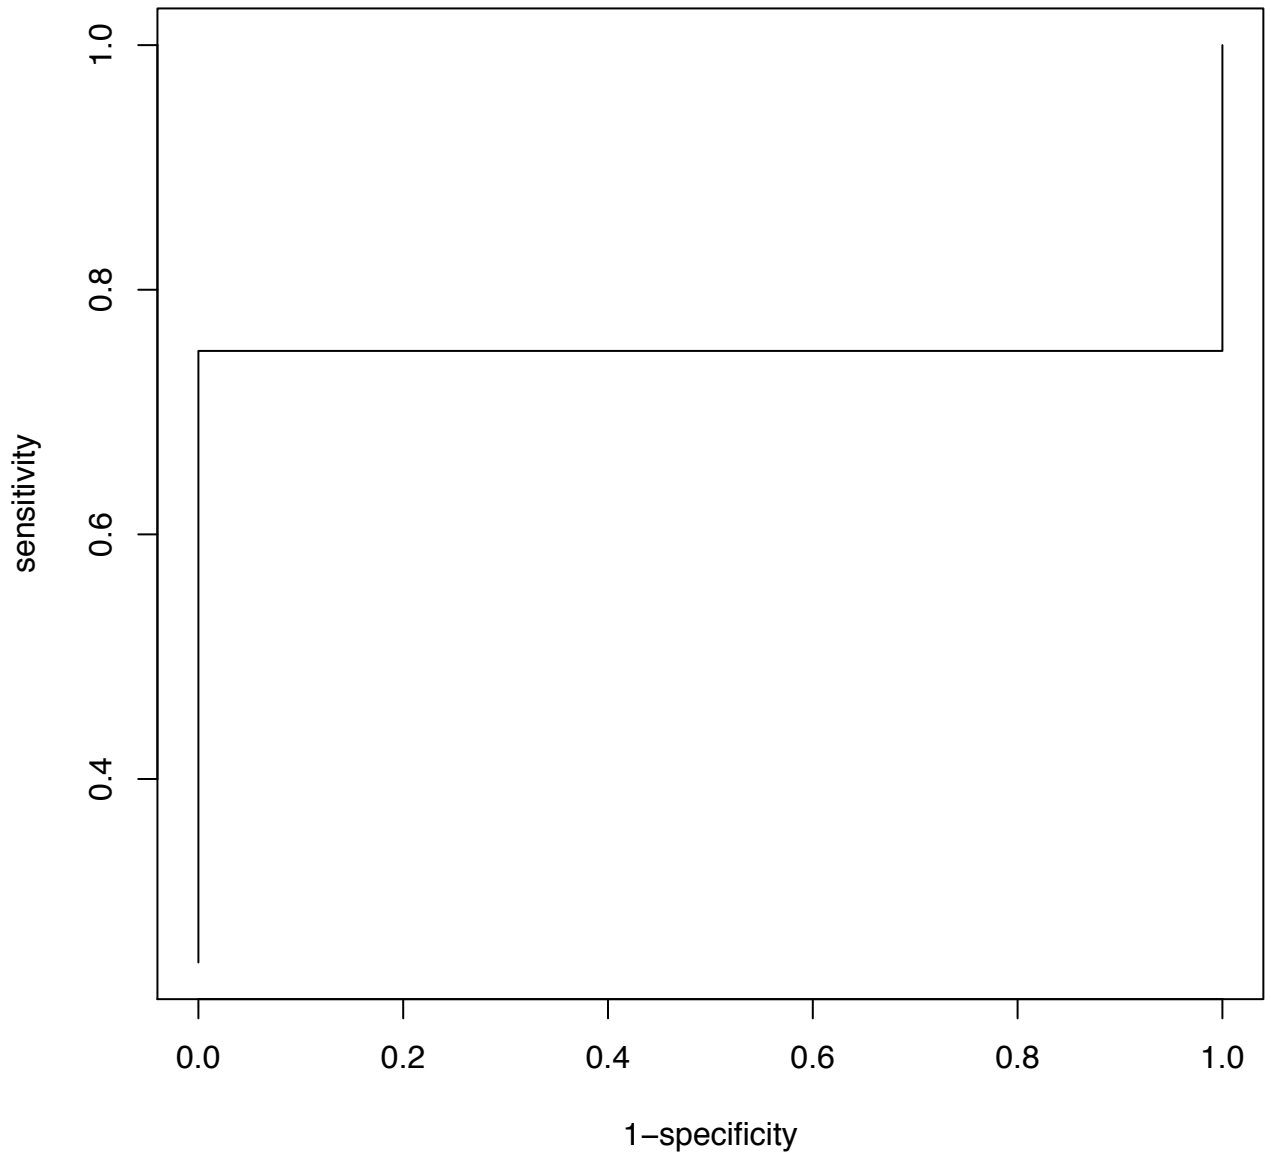

hu: LumB vs. Normal . Number of peptides: NA

ROC area = 0.88 p-value = 0.057

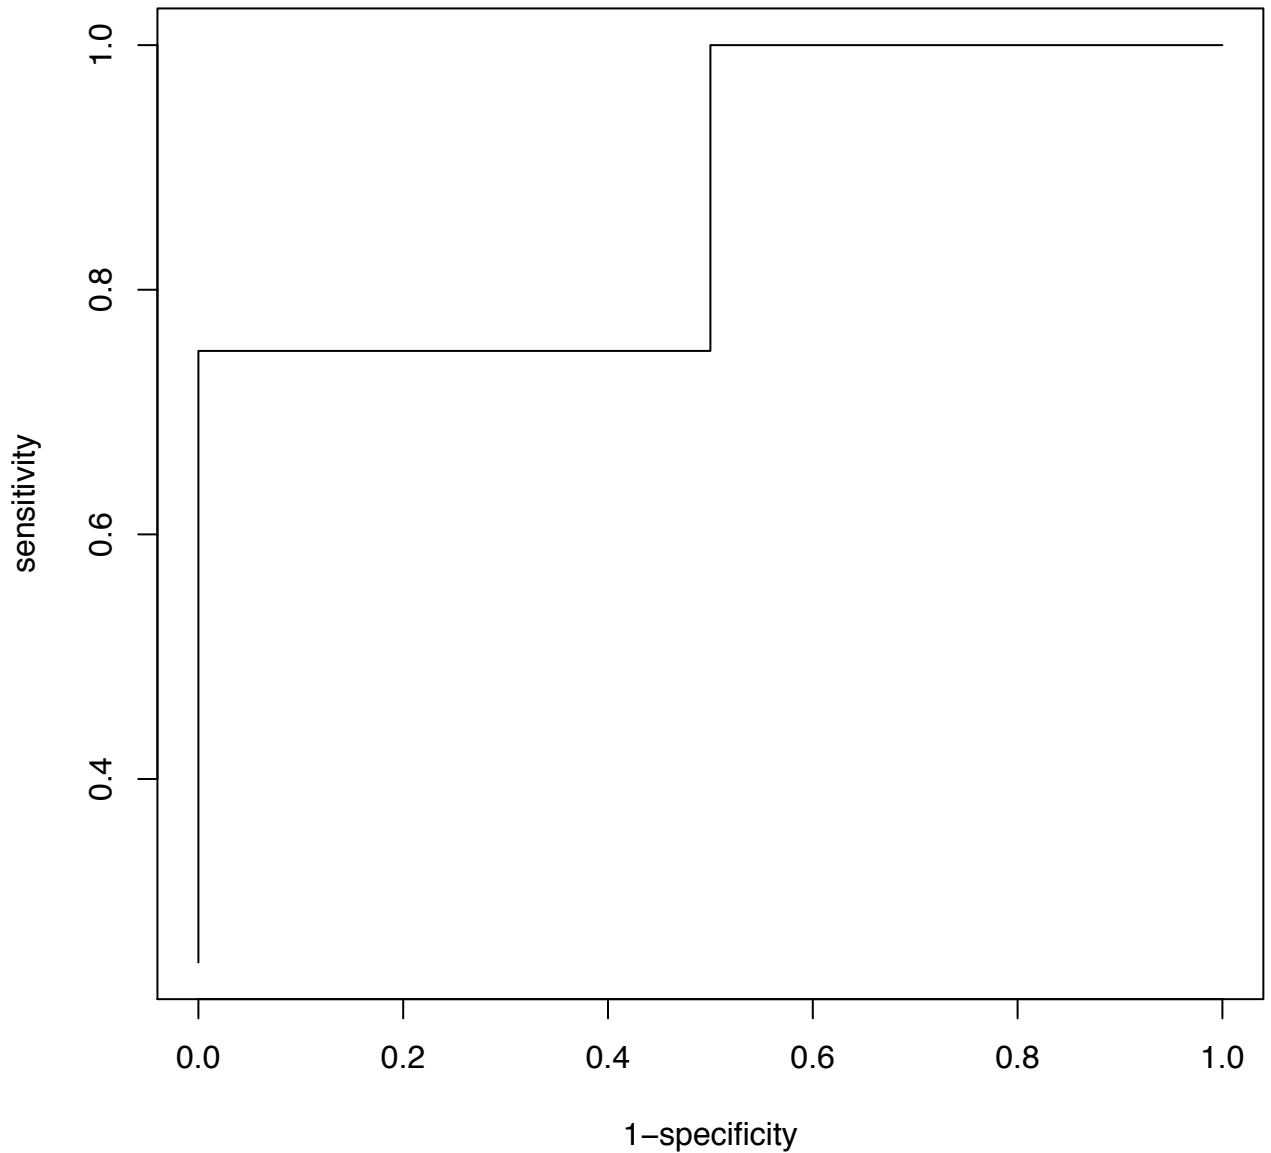

Supplement: MOESM6 [file 10305388]
