# Supplementary material for: Proteomic analysis of breast tumors confirms the mRNA intrinsic molecular subtypes using different classifiers: a large-scale analysis of fresh frozen tissue samples
Source: Springer Nature journal article supplement (doi:10.1186/s13058-016-0732-2), 2016-06-29
Supplement: MOESM1 [file 10305388]

| Cancer No | Patient_sex | HBC sample | BRCA_Status | HBC family | Sample type          | BRCA1 promo | Age at diagn | ER_status | PgR_status | OAS(days) | OAS(event) | Sárlie subtype | Best Hu      | Best PAM50   | Gel Name     |
|-----------|-------------|------------|-------------|------------|----------------------|-------------|--------------|-----------|------------|-----------|------------|----------------|--------------|--------------|--------------|
| 6723      | female      | brcac      |             | brcac      | primary tumor        | -           | 50           | er_neg    | pgr_neg    | 1491      | dead       | -              |              |              | Spor 1 Cy3   |
| 11498     | female      | brcac      |             | brcac      | primary tumor        | -           | 45           | er_neg    | pgr_neg    | 1234      | dead       | -              |              |              | Spor 1 Cy5   |
| 8768      | female      | brcac      |             | brcac      | primary tumor        | negative    | 46           | er_neg    | pgr_neg    | 1042      | dead       | -              |              |              | Spor 10 Cy5  |
| 11302     | female      | sporadic   | sporadic    | -          | primary tumor        | negative    | 49           | er_neg    | pgr_pos    | 4648      | alive      | Normal-like    | Unclassified | Basal        | Spor 100 Cy3 |
| 10640     | female      | sporadic   |             | -          | recurrence tumor     | -           | 47           | er_neg    | pgr_neg    | 4934      | alive      | -              |              |              | Spor 100 Cy5 |
| 10649     | female      | sporadic   |             | -          | primary tumor        | -           | 50           | er_pos    | pgr_pos    | 4933      | alive      | -              |              |              | Spor 101 Cy3 |
| 10672     | female      | sporadic   | sporadic    | -          | primary tumor        | -           | 47           | er_pos    | pgr_pos    | 2200      | dead       | Luminal-A      | Unclassified | HER2enriched | Spor 101 Cy5 |
| 10677     | female      | sporadic   | sporadic    | -          | primary tumor        | -           | 52           | er_pos    | pgr_pos    | 4916      | alive      | Luminal-B      | Unclassified | Basal        | Spor 102 Cy3 |
| 9833      | female      | sporadic   | sporadic    | -          | primary tumor        | negative    | 42           | er_neg    | pgr_neg    | 1190      | dead       | Basal          | Basal        | Basal        | Spor 102 Cy5 |
| 9460      | female      | sporadic   | sporadic    | -          | primary tumor        | negative    | 49           | er_pos    | pgr_pos    | 1716      | dead       | ERBB2          | Basal        | LumB         | Spor 103 Cy3 |
| 9319      | female      | sporadic   | sporadic    | -          | primary tumor        | negative    | 40           | er_pos    | pgr_pos    | 5511      | alive      | Luminal-B      | HER2enriched | HER2enriched | Spor 103 Cy5 |
| 9408      | female      | sporadic   |             | -          | primary tumor        | -           | 44           | er_pos    | pgr_pos    | 5476      | alive      | -              |              |              | Spor 104 Cy3 |
| 9289      | female      | sporadic   | sporadic    | -          | primary tumor        | -           | 49           | er_pos    | pgr_pos    | 5528      | alive      | Normal-like    | Normal       | Normal       | Spor 104 Cy5 |
| 9292      | female      | sporadic   | sporadic    | -          | primary tumor        | negative    | 44           | er_neg    | pgr_neg    | 5525      | alive      | Basal          | Basal        | Basal        | Spor 105 Cy3 |
| 10980     | female      | sporadic   |             | -          | primary tumor        | -           | 43           | er_pos    | pgr_pos    | 4772      | alive      | -              |              |              | Spor 105 Cy5 |
| 11278     | female      | sporadic   | sporadic    | -          | primary tumor        | -           | 47           | er_pos    | pgr_pos    | 4656      | alive      | Luminal-A      | Normal       | Normal       | Spor 106 Cy3 |
| 10847     | female      | sporadic   | sporadic    | -          | primary tumor        | positive    | 39           | er_neg    | pgr_neg    | 4830      | alive      | Basal          | Basal        | Basal        | Spor 106 Cy5 |
| 10830     | female      | sporadic   |             | -          | primary tumor        | -           | 47           | er_pos    | pgr_pos    | 4838      | alive      | -              |              |              | Spor 107 Cy3 |
| 11042     | female      | sporadic   |             | -          | primary tumor        | -           | 50           | er_pos    | pgr_pos    | 4748      | alive      | -              |              |              | Spor 107 Cy5 |
| 11052     | female      | sporadic   |             | -          | primary tumor        | -           | 51           | er_pos    | pgr_pos    | 4748      | alive      | -              |              |              | Spor 108 Cy3 |
| 11183     | female      | sporadic   |             | -          | primary tumor        | -           | 53           | er_pos    | pgr_neg    | 4704      | alive      | -              |              |              | Spor 108 Cy5 |
| 10925     | female      | sporadic   | sporadic    | -          | primary tumor        | negative    | 33           | er_neg    | pgr_neg    | 841       | dead       | ERBB2          | HER2enriched | HER2enriched | Spor 109 Cy3 |
| 11882     | female      | sporadic   |             | -          | primary tumor        | -           | 47           | er_pos    | pgr_pos    | 4405      | alive      | -              |              |              | Spor 109 Cy5 |
| 4534      | female      | brcac      |             | brcac      | primary tumor        | -           | 43           | er_pos    | pgr_pos    | 7664      | alive      | -              |              |              | Spor 11 Cy5  |
| 11774     | female      | sporadic   | sporadic    | -          | primary tumor        | negative    | 50           | er_neg    | pgr_neg    | 2004      | dead       | Luminal-A      | Unclassified | Unclassified | Spor 110 Cy3 |
| 11335     | female      | sporadic   |             | -          | primary tumor        | -           | 49           | er_neg    | pgr_neg    | 4634      | alive      | -              |              |              | Spor 110 Cy5 |
| 9972      | female      | sporadic   |             | -          | primary tumor        | -           | 85           | er_pos    | pgr_pos    | 3095      | dead       | -              |              |              | Spor 111 Cy3 |
| 10976     | female      | sporadic   | sporadic    | -          | primary tumor        | -           | 48           | er_pos    | pgr_pos    | 4773      | alive      | Luminal-A      | LumB         | LumB         | Spor 111 Cy5 |
| 9894      | female      | sporadic   |             | -          | primary tumor        | -           | 46           | er_pos    | pgr_pos    | 5279      | alive      | -              |              |              | Spor 112 Cy3 |
| 9877      | female      | sporadic   | sporadic    | -          | primary tumor        | negative    | 46           | er_neg    | pgr_neg    | 5287      | alive      | Basal          | Basal        | Basal        | Spor 112 Cy5 |
| 18098     | female      | sporadic   |             | -          | primary tumor        | -           | 28           | -         | -          | 1378      | alive      | -              |              |              | Spor 113 Cy3 |
| 9641      | female      | sporadic   | sporadic    | -          | primary tumor        | -           | 51           | er_neg    | pgr_pos    | 5374      | alive      | Luminal-A      | LumA         | LumA         | Spor 113 Cy5 |
| 8921      | female      | sporadic   | sporadic    | -          | primary tumor        | -           | 45           | er_neg    | pgr_neg    | 5676      | alive      | Basal          | Basal        | Basal        | Spor 114 Cy3 |
| 9718      | female      | sporadic   | sporadic    | -          | primary tumor        | -           | 50           | er_pos    | pgr_neg    | 5341      | alive      | Luminal-A      | Unclassified | LumB         | Spor 114 Cy5 |
| 11412     | female      | sporadic   | sporadic    | -          | primary tumor        | -           | 42           | er_pos    | pgr_pos    | 4609      | alive      | Luminal-B      | HER2enriched | HER2enriched | Spor 115 Cy3 |
| 10786     | female      | sporadic   | sporadic    | -          | primary tumor        | -           | 43           | er_pos    | pgr_pos    | 4860      | alive      | Luminal-A      | LumA         | LumA         | Spor 115 Cy5 |
| 6230      | female      | sporadic   | sporadic    | -          | primary tumor        | -           | 46           | er_pos    | pgr_pos    | 3244      | dead       | Normal-like    | LumA         | LumA         | Spor 116 Cy3 |
| 4602      | female      | sporadic   |             | -          | primary tumor        | -           | 54           | er_pos    | pgr_neg    | 7631      | alive      | -              |              |              | Spor 116 Cy5 |
| 5380      | female      | sporadic   | sporadic    | -          | primary tumor        | -           | 41           | er_pos    | pgr_pos    | 5136      | dead       | Luminal-A      | LumA         | LumA         | Spor 117 Cy3 |
| 6040      | female      | sporadic   | sporadic    | -          | primary tumor        | -           | 45           | er_pos    | pgr_pos    | 3031      | dead       | Normal-like    | Normal       | Normal       | Spor 117 Cy5 |
| 6085      | female      | sporadic   | sporadic    | -          | primary tumor        | negative    | 46           | er_neg    | pgr_neg    | 805       | dead       | Basal          | Basal        | Basal        | Spor 118 Cy3 |
| 5018      | female      | sporadic   |             | -          | primary tumor        | -           | 34           | er_pos    | pgr_pos    | 984       | dead       | -              |              |              | Spor 118 Cy5 |
| 7030      | female      | sporadic   |             | -          | primary tumor        | -           | 47           | er_pos    | pgr_pos    | 2601      | dead       | -              |              |              | Spor 119 Cy3 |
| 6746      | female      | sporadic   | sporadic    | -          | primary tumor        | -           | 49           | er_pos    | pgr_pos    | 6594      | alive      | Normal-like    | Normal       | LumA         | Spor 119 Cy5 |
| 8076      | female      | brcac      |             | brcac      | non_malignant_sample | -           | 46           | er_neg    | pgr_pos    | -         | -          | -              |              |              | Spor 12 Cy3  |
| 14321     | female      | sporadic   | sporadic    | -          | primary tumor        | positive    | 49           | er_neg    | pgr_neg    | 3345      | alive      | Basal          | Basal        | Basal        | Spor 12 Cy5  |
| 6747      | female      | sporadic   |             | -          | primary tumor        | -           | 41           | er_pos    | pgr_pos    | 6594      | alive      | -              |              |              | Spor 120 Cy3 |
| 5063      | female      | sporadic   |             | -          | primary tumor        | -           | 51           | er_pos    | pgr_pos    | 1642      | dead       | -              |              |              | Spor 120 Cy5 |
| 5096      | female      | sporadic   |             | -          | primary tumor        | -           | 37           | er_pos    | pgr_pos    | 1208      | dead       | -              |              |              | Spor 121 Cy3 |
| 7036      | female      | sporadic   | sporadic    | -          | primary tumor        | -           | 45           | er_pos    | pgr_pos    | 6456      | alive      | Luminal-A      | LumA         | Normal       | Spor 121 Cy5 |
| 17414     | male        | brcac      |             | brcac      | primary tumor        | -           | 55           | -         | -          | -         | -          | -              |              |              | Spor 122 Cy3 |

|              |          |          |       |                  |          |           |         |            |             |              |              |              |
|--------------|----------|----------|-------|------------------|----------|-----------|---------|------------|-------------|--------------|--------------|--------------|
| 8613 female  | sporadic | sporadic | -     | primary tumor    | negative | 44 er_pos | pgr_pos | 2082 dead  | Luminal-A   | LumA         | Unclassified | Spor 122 Cy5 |
| 9544 female  | sporadic |          | -     | primary tumor    | -        | 50 er_pos | pgr_pos | 5434 alive | -           |              |              | Spor 123 Cy3 |
| 9602 female  | sporadic | sporadic | -     | primary tumor    | positive | 48 er_pos | pgr_pos | 2387 dead  | Luminal-A   | LumA         | Normal       | Spor 123 Cy5 |
| 18104 female | sporadic |          | -     | primary tumor    | -        | 63 -      | -       | -          | -           |              |              | Spor 124 Cy3 |
| 9469 female  | sporadic | sporadic | -     | primary tumor    | -        | 52 er_pos | pgr_pos | 5446 alive | Luminal-A   | Unclassified | Unclassified | Spor 124 Cy5 |
| 18100 female | sporadic |          | -     | primary tumor    | -        | 61 -      | -       | 1381 alive | -           |              |              | Spor 125 Cy3 |
| 18091 female | sporadic |          | -     | primary tumor    | -        | 64 -      | -       | 1388 alive | -           |              |              | Spor 125 Cy5 |
| 18088 female | sporadic |          | -     | primary tumor    | -        | 46 -      | -       | 1388 alive | -           |              |              | Spor 126 Cy3 |
| 18092 female | sporadic |          | -     | primary tumor    | -        | 89 -      | -       | 1315 dead  | -           |              |              | Spor 126 Cy5 |
| 11822 female | sporadic | sporadic | -     | primary tumor    | positive | 47 er_neg | pgr_neg | 4437 alive | Basal       | Basal        | Basal        | Spor 127 Cy3 |
| 18105 female | sporadic |          | -     | primary tumor    | -        | 71 -      | -       | 1374 alive | -           |              |              | Spor 127 Cy5 |
| 11348 female | sporadic | sporadic | -     | primary tumor    | negative | 32 er_neg | pgr_pos | 1684 dead  | Luminal-B   | Unclassified | Basal        | Spor 128 Cy5 |
| 11472 female | sporadic | sporadic | -     | primary tumor    | negative | 41 er_neg | pgr_neg | 4580 alive | Basal       | Basal        | Basal        | Spor 129 Cy3 |
| 11462 female | sporadic | sporadic | -     | primary tumor    | -        | 46 er_pos | pgr_pos | 4580 alive | Luminal-A   | LumA         | LumA         | Spor 129 Cy5 |
| 11954 female | brcac    |          | brcac | recurrence tumor | -        | 38 er_neg | pgr_neg | 565 dead   | -           |              |              | Spor 13 Cy3  |
| 15970 female | brcac    |          | brcac | primary tumor    | -        | 54 er_neg | pgr_neg | 1657 dead  | -           |              |              | Spor 13 Cy5  |
| 14250 female | sporadic |          | -     | primary tumor    | -        | 52 er_neg | pgr_neg | 1349 dead  | -           |              |              | Spor 130 Cy3 |
| 9715 female  | sporadic |          | -     | primary tumor    | -        | 33 er_neg | pgr_pos | 5342 alive | -           |              |              | Spor 130 Cy5 |
| 10921 female | sporadic | sporadic | -     | primary tumor    | negative | 47 er_neg | pgr_neg | 4793 alive | ERBB2       | HER2enriched | HER2enriched | Spor 131 Cy3 |
| 9774 female  | sporadic | sporadic | -     | primary tumor    | -        | 39 er_neg | pgr_neg | 5334 alive | Basal       | Basal        | Basal        | Spor 131 Cy5 |
| 10825 female | sporadic | sporadic | -     | primary tumor    | negative | 42 er_pos | pgr_pos | 4613 dead  | Luminal-A   | Unclassified | LumB         | Spor 132 Cy3 |
| 11059 female | sporadic |          | -     | primary tumor    | -        | 40 er_neg | pgr_pos | 4741 alive | -           |              |              | Spor 132 Cy5 |
| 11972 female | sporadic | sporadic | -     | primary tumor    | negative | 32 er_neg | pgr_pos | 4375 alive | Luminal-A   | LumA         | Normal       | Spor 133 Cy3 |
| 10457 female | sporadic |          | -     | primary tumor    | -        | 50 er_neg | pgr_neg | 5014 alive | -           |              |              | Spor 133 Cy5 |
| 10241 female | sporadic |          | -     | primary tumor    | -        | 43 er_neg | pgr_neg | 5110 alive | -           |              |              | Spor 134 Cy3 |
| 10365 female | sporadic |          | -     | primary tumor    | -        | 55 er_neg | pgr_neg | 5068 alive | -           |              |              | Spor 134 Cy5 |
| 9674 female  | sporadic | sporadic | -     | primary tumor    | -        | 53 er_pos | pgr_pos | 5362 alive | Luminal-A   | LumA         | LumA         | Spor 135 Cy3 |
| 10691 female | sporadic |          | -     | primary tumor    | -        | 51 er_neg | pgr_neg | 2320 dead  | -           |              |              | Spor 135 Cy5 |
| 7144 female  | sporadic | sporadic | -     | primary tumor    | negative | 45 er_neg | pgr_neg | 173 dead   | ERBB2       | HER2enriched | HER2enriched | Spor 136 Cy3 |
| 14320 female | sporadic |          | -     | primary tumor    | -        | 46 er_neg | pgr_pos | 2564 dead  | -           |              |              | Spor 136 Cy5 |
| 7802 female  | sporadic | sporadic | -     | primary tumor    | negative | 48 er_neg | pgr_neg | 6131 alive | ERBB2       | Basal        | HER2enriched | Spor 137 Cy3 |
| 9907 female  | sporadic | sporadic | -     | primary tumor    | -        | 34 er_pos | pgr_pos | 5280 alive | Luminal-A   | LumB         | LumA         | Spor 137 Cy5 |
| 9858 female  | sporadic | sporadic | -     | primary tumor    | negative | 44 er_neg | pgr_neg | 722 dead   | ERBB2       | Basal        | HER2enriched | Spor 138 Cy3 |
| 7444 female  | sporadic |          | -     | primary tumor    | -        | 43 er_neg | pgr_neg | 4222 dead  | -           |              |              | Spor 138 Cy5 |
| 10506 female | sporadic | sporadic | -     | primary tumor    | -        | 51 er_pos | pgr_pos | 4991 alive | Luminal-A   | Unclassified | Unclassified | Spor 139 Cy3 |
| 14453 female | brcac    |          | brcac | primary tumor    | -        | 48 er_pos | pgr_pos | 3283 alive | -           |              |              | Spor 139 Cy5 |
| 12504 female | brcac    |          | brcac | primary tumor    | -        | 40 er_pos | pgr_pos | 4166 alive | -           |              |              | Spor 14 Cy3  |
| 5681 female  | brcac    |          | brcac | primary tumor    | -        | 27 er_pos | -       | 7106 alive | -           |              |              | Spor 14 Cy5  |
| 7517 female  | sporadic | sporadic | -     | primary tumor    | -        | 38 er_pos | pgr_pos | 5740 dead  | Luminal-A   | LumA         | LumA         | Spor 140 Cy3 |
| 5696 female  | sporadic | sporadic | -     | primary tumor    | positive | 37 er_neg | pgr_neg | 7112 alive | Basal       | Basal        | Basal        | Spor 140 Cy5 |
| 10413 female | sporadic | sporadic | -     | primary tumor    | -        | 50 er_pos | pgr_pos | 5033 alive | Luminal-A   | LumA         | LumA         | Spor 141 Cy3 |
| 5114 female  | sporadic | sporadic | -     | primary tumor    | -        | 30 er_pos | pgr_pos | 7379 alive | Luminal-A   | LumA         | LumA         | Spor 141 Cy5 |
| 7015 female  | sporadic | sporadic | -     | primary tumor    | -        | 46 er_pos | pgr_pos | 802 dead   | Luminal-A   | LumA         | LumA         | Spor 142 Cy3 |
| 10549 female | sporadic | sporadic | -     | primary tumor    | -        | 53 er_pos | pgr_pos | 2708 dead  | Luminal-A   | LumA         | LumA         | Spor 142 Cy5 |
| 7470 female  | sporadic | sporadic | -     | primary tumor    | negative | 48 er_neg | pgr_pos | 5340 dead  | Normal-like | Normal       | Normal       | Spor 143 Cy3 |
| 16163 female | brcac    |          | brcac | primary tumor    | -        | 74 er_pos | pgr_neg | 2548 alive | -           |              |              | Spor 143 Cy5 |
| 11210 female | sporadic | sporadic | -     | primary tumor    | -        | 46 er_pos | pgr_pos | 3876 dead  | Luminal-A   | LumA         | LumA         | Spor 144 Cy3 |
| 10147 female | sporadic | sporadic | -     | primary tumor    | negative | 50 er_neg | pgr_neg | 5145 alive | Basal       | Basal        | Normal       | Spor 144 Cy5 |
| 7800 female  | sporadic | sporadic | -     | primary tumor    | negative | 45 er_pos | pgr_pos | 6133 alive | Luminal-A   | LumB         | LumB         | Spor 145 Cy3 |
| 12720 female | sporadic |          | -     | recurrence tumor | -        | 46 er_neg | pgr_neg | 2396 dead  | -           |              |              | Spor 145 Cy5 |
| 5815 female  | sporadic | sporadic | -     | primary tumor    | -        | 48 er_neg | pgr_neg | 995 dead   | Basal       | Basal        | Basal        | Spor 146 Cy3 |
| 11287 female | sporadic | sporadic | -     | primary tumor    | -        | 50 er_pos | pgr_pos | 4656 alive | Luminal-A   | LumA         | LumA         | Spor 146 Cy5 |

|              |          |          |       |                  |          |           |         |            |             |              |              |              |
|--------------|----------|----------|-------|------------------|----------|-----------|---------|------------|-------------|--------------|--------------|--------------|
| 7596 female  | sporadic | sporadic | -     | primary tumor    | negative | 33 er_neg | pgr_neg | 1171 dead  | ERBB2       | Basal        | HER2enriched | Spor 147 Cy3 |
| 6176 female  | sporadic | sporadic | -     | primary tumor    | negative | 50 er_pos | pgr_pos | 6868 alive | Luminal-B   | LumB         | LumB         | Spor 147 Cy5 |
| 9846 female  | sporadic | sporadic | -     | primary tumor    | negative | 37 er_pos | pgr_pos | 2685 dead  | Luminal-B   | Unclassified | LumB         | Spor 148 Cy3 |
| 13895 female | sporadic |          | -     | recurrence tumor | -        | 48 er_neg | pgr_neg | 429 dead   | -           |              |              | Spor 148 Cy5 |
| 8015 female  | sporadic | sporadic | -     | primary tumor    | -        | 51 er_pos | pgr_pos | 3685 dead  | Luminal-A   | LumB         | LumA         | Spor 149 Cy3 |
| 7469 female  | sporadic |          | -     | primary tumor    | -        | 45 er_pos | pgr_pos | 2563 dead  | -           |              |              | Spor 149 Cy5 |
| 10395 female | sporadic | sporadic | -     | primary tumor    | -        | 52 er_pos | pgr_pos | 5043 alive | Luminal-A   | LumA         | LumA         | Spor 15 Cy3  |
| 10460 female | sporadic | sporadic | -     | primary tumor    | -        | 52 er_pos | pgr_pos | 5012 alive | Luminal-A   | Unclassified | LumB         | Spor 15 Cy5  |
| 5300 female  | sporadic | sporadic | -     | primary tumor    | negative | 51 er_neg | pgr_neg | 7299 alive | ERBB2       | HER2enriched | HER2enriched | Spor 150 Cy3 |
| 11121 female | sporadic | sporadic | -     | primary tumor    | negative | 46 er_neg | pgr_neg | 4725 alive | ERBB2       | HER2enriched | HER2enriched | Spor 150 Cy5 |
| 7631 female  | brca1    |          | brca1 | primary tumor    | -        | 48 er_neg | pgr_neg | 5796 dead  | -           |              |              | Spor 151 Cy3 |
| 4404 female  | sporadic | sporadic | -     | primary tumor    | -        | 49 er_pos | pgr_pos | 2452 dead  | Luminal-A   | Unclassified | Unclassified | Spor 151 Cy5 |
| 6871 female  | sporadic | sporadic | -     | primary tumor    | -        | 41 er_neg | pgr_neg | 732 dead   | Basal       | Basal        | Basal        | Spor 152 Cy3 |
| 6884 female  | brcac    |          | brcac | primary tumor    | -        | 53 er_neg | pgr_neg | 6532 alive | -           |              |              | Spor 152 Cy5 |
| 8115 female  | sporadic | sporadic | -     | primary tumor    | -        | 34 er_pos | pgr_pos | 6014 alive | Normal-like | Normal       | Unclassified | Spor 153 Cy3 |
| 7004 female  | sporadic | sporadic | -     | primary tumor    | negative | 40 er_neg | pgr_neg | 6469 alive | ERBB2       | HER2enriched | HER2enriched | Spor 153 Cy5 |
| 5704 female  | sporadic | sporadic | -     | primary tumor    | negative | 46 er_neg | pgr_neg | 584 dead   | ERBB2       | Normal       | Normal       | Spor 154 Cy3 |
| 12735 female | brcac    |          | brcac | primary tumor    | -        | 36 er_neg | pgr_neg | 4052 alive | -           |              |              | Spor 154 Cy5 |
| 6211 female  | sporadic |          | -     | primary tumor    | negative | 41 er_pos | pgr_neg | 2716 dead  | -           |              |              | Spor 155 Cy3 |
| 4628 female  | sporadic | sporadic | -     | primary tumor    | negative | 52 er_neg | pgr_pos | 5643 dead  | Luminal-B   | HER2enriched | HER2enriched | Spor 155 Cy5 |
| 9878 female  | sporadic | sporadic | -     | primary tumor    | positive | 46 er_pos | pgr_pos | 5287 alive | Luminal-B   | Basal        | Basal        | Spor 156 Cy3 |
| 14329 female | sporadic |          | -     | primary tumor    | -        | 56 er_neg | pgr_neg | 154 dead   | -           |              |              | Spor 156 Cy5 |
| 11950 female | brcac    |          | brcac | primary tumor    | negative | 56 er_neg | pgr_pos | 4384 alive | -           |              |              | Spor 157 Cy3 |
| 14324 female | ???      |          | ???   | primary tumor    | -        | 56 er_pos | pgr_neg | 2999 dead  | -           |              |              | Spor 157 Cy5 |
| 7194 female  | sporadic | sporadic | -     | primary tumor    | -        | 38 er_pos | pgr_pos | 3015 dead  | Luminal-A   | LumA         | LumB         | Spor 158 Cy3 |
| 10196 female | sporadic | sporadic | -     | primary tumor    | negative | 81 er_neg | pgr_neg | 4378 dead  | ERBB2       | Basal        | Basal        | Spor 158 Cy5 |
| 9322 female  | sporadic | sporadic | -     | primary tumor    | positive | 50 er_neg | pgr_neg | 5511 alive | Basal       | Basal        | Basal        | Spor 159 Cy3 |
| 10513 female | sporadic | sporadic | -     | primary tumor    | positive | 41 er_neg | pgr_neg | 4991 alive | Basal       | Basal        | Basal        | Spor 16 Cy3  |
| 10185 female | sporadic | sporadic | -     | primary tumor    | -        | 48 er_pos | pgr_pos | 5131 alive | Luminal-A   | LumA         | LumA         | Spor 16 Cy5  |
| 10162 female | sporadic |          | -     | primary tumor    | negative | 50 er_neg | pgr_neg | 5140 alive | -           |              |              | Spor 17 Cy3  |
| 10206 female | sporadic | sporadic | -     | primary tumor    | -        | 52 er_pos | pgr_pos | 5123 alive | Normal-like | Normal       | Normal       | Spor 17 Cy5  |
| 10198 female | sporadic | sporadic | -     | primary tumor    | negative | 48 er_pos | pgr_pos | 2374 dead  | Luminal-A   | LumA         | LumA         | Spor 18 Cy3  |
| 10307 female | sporadic | sporadic | -     | primary tumor    | positive | 49 er_neg | pgr_neg | 5076 alive | Basal       | Basal        | Basal        | Spor 18 Cy5  |
| 10273 female | sporadic |          | -     | primary tumor    | -        | 49 er_neg | pgr_pos | 5089 alive | -           |              |              | Spor 19 Cy3  |
| 9759 female  | sporadic | sporadic | -     | primary tumor    | -        | 48 er_pos | pgr_pos | 5336 alive | Normal-like | Normal       | Normal       | Spor 19 Cy5  |
| 12008 female | brcac    |          | brcac | primary tumor    | -        | 46 er_neg | pgr_pos | 4360 alive | -           |              |              | Spor 2 Cy3   |
| 8820 female  | sporadic |          | -     | primary tumor    | -        | 73 er_pos | pgr_pos | 4986 dead  | -           |              |              | Spor 2 Cy5   |
| 10339 female | sporadic | sporadic | -     | primary tumor    | -        | 53 er_pos | pgr_pos | 5070 alive | Luminal-A   | LumA         | LumA         | Spor 20 Cy3  |
| 9220 female  | sporadic | sporadic | -     | primary tumor    | negative | 36 er_pos | pgr_neg | 5544 alive | Luminal-B   | LumB         | LumB         | Spor 20 Cy5  |
| 9843 female  | sporadic |          | -     | primary tumor    | negative | 50 er_neg | pgr_neg | 5301 alive | -           |              |              | Spor 21 Cy3  |
| 9291 female  | sporadic |          | -     | primary tumor    | -        | 39 er_pos | pgr_neg | 5523 alive | -           |              |              | Spor 21 Cy5  |
| 9346 female  | sporadic | sporadic | -     | primary tumor    | negative | 43 er_neg | pgr_pos | 2327 dead  | ERBB2       | Normal       | Normal       | Spor 22 Cy3  |
| 9317 female  | sporadic | sporadic | -     | primary tumor    | -        | 47 er_pos | pgr_pos | 5518 alive | Luminal-A   | LumA         | Normal       | Spor 22 Cy5  |
| 9704 female  | sporadic | sporadic | -     | primary tumor    | -        | 48 er_pos | pgr_neg | 5350 alive | Luminal-A   | LumA         | LumA         | Spor 23 Cy3  |
| 6860 female  | sporadic |          | -     | primary tumor    | -        | 47 er_pos | pgr_pos | 6546 alive | -           |              |              | Spor 23 Cy5  |
| 5089 female  | sporadic |          | -     | primary tumor    | -        | 38 er_pos | pgr_pos | 7391 alive | -           |              |              | Spor 24 Cy3  |
| 5909 female  | sporadic | sporadic | -     | primary tumor    | negative | 48 er_neg | pgr_pos | 4660 dead  | Luminal-A   | LumA         | HER2enriched | Spor 24 Cy5  |
| 6112 female  | sporadic | sporadic | -     | primary tumor    | -        | 47 er_pos | pgr_pos | 6904 alive | Luminal-A   | LumA         | LumA         | Spor 25 Cy3  |
| 6877 female  | sporadic | sporadic | -     | primary tumor    | -        | 34 er_pos | pgr_pos | 5086 dead  | Luminal-A   | Unclassified | Unclassified | Spor 25 Cy5  |
| 6895 female  | sporadic | sporadic | -     | primary tumor    | -        | 39 er_pos | pgr_pos | 2693 dead  | Luminal-A   | LumA         | LumB         | Spor 26 Cy3  |
| 6532 female  | sporadic |          | -     | primary tumor    | -        | 54 er_pos | pgr_pos | 563 dead   | -           |              |              | Spor 26 Cy5  |
| 6805 female  | sporadic | sporadic | -     | primary tumor    | -        | 42 er_neg | pgr_pos | 6573 alive | Normal-like | Normal       | Normal       | Spor 27 Cy3  |

|       |        |          |          |       |                      |          |    |        |         |      |       |             |              |              |         |     |
|-------|--------|----------|----------|-------|----------------------|----------|----|--------|---------|------|-------|-------------|--------------|--------------|---------|-----|
| 6009  | female | sporadic | sporadic | -     | primary tumor        | -        | 49 | er_pos | pgr_pos | 6950 | alive | Luminal-A   | LumA         | LumB         | Spor 27 | Cy5 |
| 7188  | female | sporadic | sporadic | -     | primary tumor        | negative | 42 | er_neg | pgr_neg | 584  | dead  | Luminal-B   | Unclassified | Normal       | Spor 28 | Cy3 |
| 6514  | female | sporadic | sporadic | -     | primary tumor        | -        | 49 | er_neg | pgr_neg | 6722 | alive | Normal-like | Normal       | Normal       | Spor 28 | Cy5 |
| 4570  | female | sporadic | sporadic | -     | primary tumor        | negative | 49 | er_pos | pgr_pos | 852  | dead  | ERBB2       | HER2enriched | HER2enriched | Spor 29 | Cy3 |
| 5571  | female | brcac    |          | brcac | primary tumor        | -        | 39 | er_pos | pgr_pos | 7148 | alive | -           |              |              | Spor 29 | Cy5 |
| 18071 | female | sporadic |          | -     | primary tumor        | -        | 50 | -      | -       | 1398 | alive | -           |              |              | Spor 3  | Cy3 |
| 18107 | female | sporadic |          | -     | primary tumor        | -        | 64 | -      | -       | 1382 | alive | -           |              |              | Spor 3  | Cy5 |
| 6979  | female | sporadic | sporadic | -     | primary tumor        | negative | 53 | er_neg | pgr_neg | 6505 | alive | Basal       | Basal        | Basal        | Spor 30 | Cy3 |
| 6964  | female | sporadic |          | -     | primary tumor        | -        | 42 | er_neg | pgr_neg | 879  | dead  | -           |              |              | Spor 30 | Cy5 |
| 7276  | female | sporadic | sporadic | -     | primary tumor        | -        | 41 | er_pos | pgr_pos | 6354 | alive | Normal-like | LumA         | LumA         | Spor 31 | Cy3 |
| 5570  | female | sporadic |          | -     | primary tumor        | -        | 49 | er_pos | pgr_pos | 1523 | dead  | -           |              |              | Spor 31 | Cy5 |
| 7462  | female | sporadic | sporadic | -     | primary tumor        | negative | 42 | er_pos | pgr_pos | 6260 | alive | ERBB2       | Unclassified | LumB         | Spor 32 | Cy3 |
| 6627  | female | sporadic | sporadic | -     | primary tumor        | -        | 43 | er_pos | pgr_pos | 6649 | alive | Normal-like | Normal       | Normal       | Spor 32 | Cy5 |
| 8204  | female | sporadic | sporadic | -     | primary tumor        | -        | 49 | er_pos | pgr_neg | 5979 | alive | Normal-like | Normal       | LumA         | Spor 33 | Cy3 |
| 7219  | female | sporadic | sporadic | -     | primary tumor        | negative | 46 | er_pos | pgr_pos | 1097 | dead  | Luminal-B   | Unclassified | LumB         | Spor 33 | Cy5 |
| 7918  | female | sporadic |          | -     | primary tumor        | -        | 50 | er_pos | pgr_pos | 1807 | dead  | -           |              |              | Spor 34 | Cy3 |
| 7278  | female | sporadic | sporadic | -     | primary tumor        | negative | 47 | er_neg | pgr_neg | 6351 | alive | ERBB2       | HER2enriched | Normal       | Spor 34 | Cy5 |
| 17532 | female | brca1    |          | brca1 | non_malignant_sample | -        | 44 | -      | -       | -    | -     | Normal-like |              |              | Spor 35 | Cy3 |
| 7582  | female | sporadic |          | -     | primary tumor        | -        | 52 | er_pos | pgr_pos | 6231 | alive | -           |              |              | Spor 35 | Cy5 |
| 17613 | female | brca1    | brca1    | brca1 | primary tumor        | negative | 36 | -      | -       | 1743 | alive | Basal       | Basal        | Basal        | Spor 36 | Cy3 |
| 8275  | female | sporadic | sporadic | -     | primary tumor        | negative | 42 | er_neg | pgr_pos | 4122 | dead  | Luminal-A   | LumB         | LumA         | Spor 36 | Cy5 |
| 17006 | female | sporadic | sporadic | -     | primary tumor        | negative | 64 | -      | -       | 1133 | dead  | Basal       | Basal        | Basal        | Spor 37 | Cy5 |
| 7940  | female | sporadic | sporadic | -     | primary tumor        | -        | 53 | er_pos | pgr_pos | 6084 | alive | Normal-like | Normal       | Normal       | Spor 38 | Cy5 |
| 9452  | female | sporadic | sporadic | -     | primary tumor        | -        | 42 | er_pos | pgr_pos | 2627 | dead  | Luminal-B   | Unclassified | HER2enriched | Spor 39 | Cy3 |
| 7988  | female | sporadic | sporadic | -     | primary tumor        | -        | 44 | er_pos | pgr_pos | 6069 | alive | Luminal-A   | LumA         | LumA         | Spor 39 | Cy5 |
| 18108 | female | sporadic |          | -     | primary tumor        | -        | 52 | -      | -       | 1382 | alive | -           |              |              | Spor 4  | Cy3 |
| 11056 | male   | brca2    |          | brca2 | recurrence tumor     | -        | 68 | er_neg | pgr_pos | 661  | dead  | -           |              |              | Spor 4  | Cy5 |
| 7668  | female | sporadic |          | -     | primary tumor        | -        | 52 | er_neg | pgr_neg | 1391 | dead  | -           |              |              | Spor 40 | Cy3 |
| 17533 | female | brca2    |          | brca2 | non_malignant_sample | -        | 35 | -      | -       | -    | -     | Normal-like |              |              | Spor 40 | Cy5 |
| 9222  | female | sporadic | sporadic | -     | primary tumor        | -        | 66 | er_pos | pgr_neg | 5551 | alive | Luminal-A   | LumB         | LumB         | Spor 41 | Cy3 |
| 13057 | female | sporadic |          | -     | primary tumor        | -        | 40 | er_neg | pgr_pos | 1509 | dead  | -           |              |              | Spor 41 | Cy5 |
| 9879  | female | sporadic | sporadic | -     | primary tumor        | -        | 54 | er_pos | pgr_pos | 5284 | alive | Luminal-A   | Normal       | Normal       | Spor 42 | Cy3 |
| 8835  | female | sporadic |          | -     | primary tumor        | -        | 59 | er_neg | pgr_neg | 5714 | alive | -           |              |              | Spor 43 | Cy3 |
| 17755 | female | brca2    | brca2    | brca2 | primary tumor        | -        | 48 | -      | -       | 1656 | alive | Luminal-A   | LumB         | LumB         | Spor 43 | Cy5 |
| 10227 | female | sporadic |          | -     | primary tumor        | -        | 54 | er_pos | pgr_neg | 5112 | alive | -           |              |              | Spor 44 | Cy3 |
| 9598  | female | sporadic | sporadic | -     | primary tumor        | -        | 66 | er_pos | pgr_pos | 5392 | alive | Luminal-A   | LumA         | LumA         | Spor 44 | Cy5 |
| 8706  | female | sporadic | sporadic | -     | primary tumor        | negative | 48 | er_neg | pgr_neg | 5082 | dead  | Basal       | Basal        | Basal        | Spor 45 | Cy3 |
| 10692 | female | sporadic | sporadic | -     | primary tumor        | negative | 53 | er_neg | pgr_neg | 4909 | alive | Basal       | Basal        | Basal        | Spor 45 | Cy5 |
| 8837  | female | sporadic | sporadic | -     | primary tumor        | -        | 54 | er_pos | pgr_pos | 3551 | dead  | Luminal-A   | Unclassified | Basal        | Spor 46 | Cy3 |
| 9254  | female | sporadic | sporadic | -     | primary tumor        | -        | 54 | er_pos | pgr_pos | 5562 | alive | Luminal-A   | LumA         | LumA         | Spor 46 | Cy5 |
| 9019  | female | sporadic | sporadic | -     | primary tumor        | -        | 67 | er_pos | pgr_pos | 5641 | alive | Luminal-A   | LumA         | LumA         | Spor 47 | Cy3 |
| 9340  | female | sporadic | sporadic | -     | primary tumor        | -        | 52 | er_pos | pgr_pos | 5501 | alive | Luminal-A   | LumB         | LumB         | Spor 47 | Cy5 |
| 9913  | female | sporadic |          | -     | primary tumor        | -        | 37 | er_neg | pgr_neg | 5272 | alive | -           |              |              | Spor 48 | Cy3 |
| 12455 | female | sporadic |          | -     | primary tumor        | -        | 61 | er_neg | pgr_neg | 1999 | dead  | -           |              |              | Spor 48 | Cy5 |
| 9047  | female | sporadic | sporadic | -     | primary tumor        | positive | 42 | er_neg | pgr_neg | 5629 | alive | Basal       | Basal        | Basal        | Spor 49 | Cy3 |
| 9362  | female | sporadic |          | -     | primary tumor        | -        | 63 | er_pos | pgr_pos | 5497 | alive | -           |              |              | Spor 49 | Cy5 |
| 14235 | female | sporadic |          | -     | primary tumor        | -        | 64 | er_neg | pgr_neg | 519  | dead  | -           |              |              | Spor 5  | Cy3 |
| 7747  | female | brcac    | brcac    | brcac | primary tumor        | -        | 35 | er_pos | pgr_pos | 6167 | alive | Luminal-A   | LumA         | LumA         | Spor 5  | Cy5 |
| 9689  | female | sporadic | sporadic | -     | primary tumor        | -        | 56 | er_pos | pgr_pos | 3778 | dead  | Luminal-B   | HER2enriched | HER2enriched | Spor 50 | Cy3 |
| 9916  | female | sporadic | sporadic | -     | primary tumor        | -        | 56 | er_pos | pgr_pos | 5275 | alive | Normal-like | Unclassified | Normal       | Spor 50 | Cy5 |
| 10372 | female | sporadic |          | -     | primary tumor        | -        | 72 | er_pos | pgr_pos | 3883 | dead  | -           |              |              | Spor 51 | Cy3 |
| 8869  | female | sporadic |          | -     | primary tumor        | -        | 51 | er_neg | pgr_neg | 5703 | alive | -           |              |              | Spor 51 | Cy5 |

|              |          |          |       |               |          |           |         |            |             |              |              |             |
|--------------|----------|----------|-------|---------------|----------|-----------|---------|------------|-------------|--------------|--------------|-------------|
| 9107 female  | sporadic | sporadic | -     | primary tumor | -        | 67 er_pos | pgr_pos | 5609 alive | Luminal-A   | LumA         | Normal       | Spor 52 Cy3 |
| 9303 female  | sporadic |          | -     | primary tumor | -        | 39 er_pos | pgr_pos | 5522 alive | -           |              |              | Spor 52 Cy5 |
| 9949 female  | sporadic |          | -     | primary tumor | -        | 44 er_pos | pgr_pos | 5271 alive | -           |              |              | Spor 53 Cy3 |
| 10388 female | sporadic | sporadic | -     | primary tumor | -        | 60 er_pos | pgr_pos | 5042 alive | Luminal-A   | LumB         | Unclassified | Spor 53 Cy5 |
| 8883 female  | sporadic |          | -     | primary tumor | -        | 41 er_pos | pgr_pos | 5700 alive | -           |              |              | Spor 54 Cy3 |
| 9114 female  | sporadic | sporadic | -     | primary tumor | -        | 66 er_pos | pgr_pos | 5608 alive | Luminal-A   | LumA         | LumA         | Spor 54 Cy5 |
| 9820 female  | sporadic |          | -     | primary tumor | -        | 72 er_pos | pgr_pos | 5306 alive | -           |              |              | Spor 55 Cy3 |
| 9952 female  | sporadic |          | -     | primary tumor | -        | 60 er_pos | pgr_pos | 5266 alive | -           |              |              | Spor 55 Cy5 |
| 11338 female | sporadic | sporadic | -     | primary tumor | negative | 45 er_neg | pgr_pos | 2957 dead  | Luminal-B   | Unclassified | LumB         | Spor 56 Cy3 |
| 13408 female | sporadic | sporadic | -     | primary tumor | -        | 61 er_pos | pgr_neg | 3766 alive | Luminal-A   | Unclassified | Normal       | Spor 56 Cy5 |
| 8732 female  | sporadic |          | -     | primary tumor | -        | 59 er_pos | pgr_pos | 5756 alive | -           |              |              | Spor 57 Cy3 |
| 8888 female  | sporadic | sporadic | -     | primary tumor | -        | 72 er_pos | pgr_pos | 2468 dead  | Luminal-A   | LumB         | Normal       | Spor 57 Cy5 |
| 9152 female  | sporadic | sporadic | -     | primary tumor | -        | 45 er_pos | pgr_pos | 5586 alive | Luminal-B   | HER2enriched | HER2enriched | Spor 58 Cy3 |
| 9426 female  | sporadic |          | -     | primary tumor | -        | 69 er_neg | pgr_neg | 5376 dead  | -           |              |              | Spor 58 Cy5 |
| 10430 female | sporadic | sporadic | -     | primary tumor | -        | 65 er_pos | pgr_pos | 5017 alive | Luminal-A   | LumA         | LumA         | Spor 59 Cy3 |
| 11370 female | sporadic |          | -     | primary tumor | -        | 43 er_pos | pgr_pos | 4620 alive | -           |              |              | Spor 59 Cy5 |
| 8926 female  | brcac    |          | brcac | primary tumor | -        | 80 er_pos | pgr_pos | 5685 alive | -           |              |              | Spor 6 Cy3  |
| 8996 female  | brcac    |          | brcac | primary tumor | -        | 72 er_neg | pgr_neg | 633 dead   | -           |              |              | Spor 6 Cy5  |
| 8767 female  | sporadic | sporadic | -     | primary tumor | negative | 65 er_pos | pgr_neg | 5745 alive | Normal-like | Unclassified | Normal       | Spor 60 Cy3 |
| 8893 female  | sporadic |          | -     | primary tumor | -        | 67 -      | -       | 5699 alive | -           |              |              | Spor 60 Cy5 |
| 9189 female  | sporadic |          | -     | primary tumor | -        | 62 er_pos | pgr_pos | 5567 alive | -           |              |              | Spor 61 Cy3 |
| 9514 female  | sporadic |          | -     | primary tumor | -        | 62 er_neg | pgr_neg | 5441 alive | -           |              |              | Spor 61 Cy5 |
| 9865 female  | sporadic |          | -     | primary tumor | -        | 66 er_pos | pgr_pos | 5292 alive | -           |              |              | Spor 62 Cy3 |
| 10017 female | sporadic | sporadic | -     | primary tumor | -        | 57 er_pos | pgr_pos | 5219 alive | Luminal-A   | Unclassified | Unclassified | Spor 62 Cy5 |
| 10533 female | sporadic | sporadic | -     | primary tumor | -        | 67 er_pos | pgr_pos | 4978 alive | Luminal-A   | LumA         | LumA         | Spor 63 Cy3 |
| 8798 female  | sporadic | sporadic | -     | primary tumor | -        | 61 er_pos | pgr_pos | 5728 alive | Luminal-A   | LumA         | LumB         | Spor 63 Cy5 |
| 8950 female  | sporadic |          | -     | primary tumor | -        | 64 er_pos | pgr_pos | 5552 dead  | -           |              |              | Spor 64 Cy3 |
| 9212 female  | sporadic | sporadic | -     | primary tumor | -        | 42 er_pos | pgr_pos | 5550 alive | Luminal-A   | LumB         | LumA         | Spor 64 Cy5 |
| 9546 female  | sporadic | sporadic | -     | primary tumor | -        | 62 er_pos | pgr_neg | 2549 dead  | Normal-like | Normal       | Normal       | Spor 65 Cy3 |
| 9866 female  | sporadic | sporadic | -     | primary tumor | -        | 50 er_pos | pgr_pos | 3813 dead  | Luminal-A   | LumA         | LumA         | Spor 65 Cy5 |
| 10096 female | sporadic |          | -     | primary tumor | -        | 43 er_pos | pgr_neg | 764 dead   | -           |              |              | Spor 66 Cy3 |
| 10656 female | sporadic | sporadic | -     | primary tumor | -        | 63 er_neg | pgr_neg | 4927 alive | ERBB2       | HER2enriched | HER2enriched | Spor 66 Cy5 |
| 11305 female | sporadic |          | -     | primary tumor | -        | 60 er_pos | pgr_pos | 1667 dead  | -           |              |              | Spor 67 Cy3 |
| 13943 female | sporadic |          | -     | primary tumor | -        | 49 er_pos | pgr_pos | 3516 alive | -           |              |              | Spor 67 Cy5 |
| 16004 female | sporadic |          | -     | primary tumor | -        | 53 er_pos | pgr_pos | 2611 alive | -           |              |              | Spor 68 Cy3 |
| 10065 female | sporadic |          | -     | primary tumor | -        | 48 -      | -       | 5202 alive | -           |              |              | Spor 68 Cy5 |
| 12078 female | sporadic |          | -     | primary tumor | -        | 47 er_pos | pgr_pos | 4340 alive | -           |              |              | Spor 69 Cy3 |
| 12545 female | sporadic |          | -     | primary tumor | -        | 56 er_pos | pgr_pos | 4157 alive | -           |              |              | Spor 69 Cy5 |
| 11499 female | brcac    |          | brcac | lymph_node    | -        | 45 -      | -       | 1234 dead  | -           |              |              | Spor 7 Cy3  |
| 5306 female  | sporadic |          | -     | primary tumor | -        | 39 er_neg | pgr_neg | 457 dead   | -           |              |              | Spor 7 Cy5  |
| 13327 female | sporadic |          | -     | primary tumor | -        | 62 er_pos | pgr_pos | 3801 alive | -           |              |              | Spor 70 Cy3 |
| 14631 female | sporadic |          | -     | primary tumor | -        | 51 er_neg | pgr_neg | 224 dead   | -           |              |              | Spor 70 Cy5 |
| 13833 female | sporadic |          | -     | primary tumor | -        | 46 er_pos | pgr_pos | 3568 alive | -           |              |              | Spor 71 Cy3 |
| 13880 female | sporadic |          | -     | primary tumor | -        | 51 er_pos | pgr_neg | 1785 dead  | -           |              |              | Spor 71 Cy5 |
| 14113 female | sporadic |          | -     | primary tumor | -        | 40 er_pos | pgr_pos | 3446 alive | -           |              |              | Spor 72 Cy3 |
| 14256 female | sporadic |          | -     | primary tumor | -        | 41 er_pos | pgr_pos | 3381 alive | -           |              |              | Spor 72 Cy5 |
| 10152 female | sporadic | sporadic | -     | primary tumor | -        | 63 er_pos | pgr_neg | 4255 dead  | Luminal-A   | LumA         | Normal       | Spor 73 Cy3 |
| 9447 female  | sporadic |          | -     | primary tumor | -        | 67 er_pos | pgr_pos | 4794 dead  | -           |              |              | Spor 73 Cy5 |
| 9612 female  | sporadic |          | -     | primary tumor | -        | 49 er_neg | pgr_neg | 1944 dead  | -           |              |              | Spor 74 Cy3 |
| 9893 female  | sporadic | sporadic | -     | primary tumor | -        | 65 er_pos | pgr_pos | 5287 alive | Luminal-A   | LumA         | LumA         | Spor 74 Cy5 |
| 9991 female  | sporadic |          | -     | primary tumor | -        | 67 er_pos | pgr_pos | 2042 dead  | -           |              |              | Spor 75 Cy3 |
| 9665 female  | brcac    | brcac    | brcac | primary tumor | -        | 56 er_pos | pgr_pos | 5364 alive | Luminal-A   | LumA         | LumA         | Spor 75 Cy5 |

|              |          |          |       |                       |          |           |         |            |             |              |              |             |
|--------------|----------|----------|-------|-----------------------|----------|-----------|---------|------------|-------------|--------------|--------------|-------------|
| 10844 female | sporadic | sporadic | -     | primary tumor         | -        | 57 er_pos | pgr_pos | 4830 alive | Luminal-A   | LumA         | LumA         | Spor 76 Cy3 |
| 12873 female | sporadic | sporadic | -     | primary tumor         | -        | 55 er_pos | pgr_neg | 998 dead   | Luminal-B   | LumB         | HER2enriched | Spor 76 Cy5 |
| 9745 female  | sporadic |          | -     | primary tumor         | -        | 68 er_pos | pgr_neg | 5334 alive | -           |              |              | Spor 77 Cy3 |
| 11014 female | sporadic |          | -     | primary tumor         | -        | 59 er_pos | pgr_pos | 4760 alive | -           |              |              | Spor 77 Cy5 |
| 12984 female | sporadic |          | -     | primary tumor         | -        | 45 er_pos | pgr_pos | 3668 dead  | -           |              |              | Spor 78 Cy3 |
| 8731 female  | sporadic | sporadic | -     | primary tumor         | -        | 67 -      | -       | 5753 alive | Normal-like | Normal       | Normal       | Spor 78 Cy5 |
| 9111 female  | sporadic |          | -     | primary tumor         | -        | 69 er_pos | pgr_pos | 5607 alive | -           |              |              | Spor 79 Cy3 |
| 3193 female  | brca2    |          | brca2 | primary tumor         | -        | 46 er_neg | pgr_neg | 8345 alive | -           |              |              | Spor 79 Cy5 |
| 8665 female  | sporadic |          | -     | non_malignant_sample  | -        | 63 er_neg | pgr_neg | 5777 alive | -           |              |              | Spor 8 Cy3  |
| 11609 female | sporadic | sporadic | -     | primary tumor         | negative | 33 er_pos | pgr_pos | 4528 alive | Luminal-A   | LumB         | LumB         | Spor 8 Cy5  |
| 11394 female | ???      |          | ???   | primary tumor         | -        | 34 er_neg | pgr_neg | 499 dead   | -           |              |              | Spor 80 Cy3 |
| 9002 female  | brca1    |          | brca1 | primary tumor         | -        | 38 er_neg | pgr_neg | 1264 dead  | -           |              |              | Spor 80 Cy5 |
| 2654 female  | brca1    |          | brca1 | primary tumor         | -        | 35 er_neg | pgr_neg | 8645 alive | -           |              |              | Spor 81 Cy3 |
| 5905 female  | brca1    |          | brca1 | primary tumor         | -        | 36 -      | -       | 734 dead   | -           |              |              | Spor 81 Cy5 |
| 2318 female  | brca1    |          | brca1 | primary tumor         | -        | 44 er_pos | pgr_pos | 8891 alive | -           |              |              | Spor 82 Cy3 |
| 5447 female  | brca1    | brca1    | brca1 | recurrence tumor      | -        | 34 -      | -       | 7217 alive | Basal       | Basal        | Basal        | Spor 82 Cy5 |
| 16074 female | brca1    |          | brca1 | primary tumor         | negative | 44 er_neg | pgr_neg | 2578 alive | -           |              |              | Spor 83 Cy3 |
| 5851 female  | brca1    |          | brca1 | primary tumor         | -        | 54 er_pos | pgr_pos | 7050 alive | -           |              |              | Spor 83 Cy5 |
| 7119 female  | sporadic |          | -     | primary tumor         | -        | 52 er_pos | pgr_neg | 3269 dead  | -           |              |              | Spor 84 Cy3 |
| 5873 female  | brca1    | brca1    | brca1 | primary tumor         | -        | 67 er_pos | pgr_neg | 525 dead   | Luminal-B   | Unclassified | Basal        | Spor 84 Cy5 |
| 5967 female  | brca1    |          | brca1 | primary tumor         | -        | 49 er_neg | pgr_neg | 6991 alive | -           |              |              | Spor 85 Cy3 |
| 9367 female  | brca1    | brca1    | brca1 | primary tumor         | -        | 54 er_pos | pgr_pos | 3277 dead  | Luminal-B   | Unclassified | Unclassified | Spor 85 Cy5 |
| 10690 female | brca1    | brca1    | brca1 | primary tumor         | -        | 38 er_pos | pgr_pos | 4913 alive | Luminal-A   | Unclassified | Unclassified | Spor 86 Cy3 |
| 11796 female | brca1    |          | brca1 | primary tumor         | -        | 42 er_pos | pgr_pos | 4445 alive | -           |              |              | Spor 86 Cy5 |
| 9684 female  | brca1    | brca1    | brca1 | primary tumor         | -        | 40 er_neg | pgr_pos | 5355 alive | Luminal-A   | LumA         | LumA         | Spor 87 Cy3 |
| 12083 female | brca1    |          | brca1 | primary tumor         | -        | 37 er_pos | pgr_pos | 4333 alive | -           |              |              | Spor 87 Cy5 |
| 10067 female | sporadic |          | -     | primary tumor         | -        | 46 er_neg | pgr_neg | 2842 dead  | -           |              |              | Spor 88 Cy3 |
| 10081 female | sporadic |          | -     | primary tumor         | -        | 44 er_pos | pgr_pos | 5188 alive | -           |              |              | Spor 88 Cy5 |
| 10942 female | sporadic |          | -     | primary tumor         | -        | 44 er_neg | pgr_neg | 4781 alive | -           |              |              | Spor 89 Cy3 |
| 14641 female | brca1    |          | brca1 | primary tumor         | -        | 34 er_pos | pgr_pos | 3212 alive | -           |              |              | Spor 9 Cy5  |
| 9275 female  | brca1    |          | brca1 | primary tumor         | -        | 56 er_pos | pgr_pos | 5595 alive | -           |              |              | Spor 90 Cy3 |
| 14173 female | brca1    |          | brca1 | primary tumor         | -        | 64 er_pos | pgr_pos | 3425 alive | -           |              |              | Spor 91 Cy3 |
| 9119 female  | sporadic |          | -     | primary tumor         | -        | 47 -      | -       | 1131 dead  | -           |              |              | Spor 91 Cy5 |
| 10348 female | brca1    |          | brca1 | primary tumor         | -        | 71 er_pos | pgr_pos | 3891 dead  | -           |              |              | Spor 92 Cy3 |
| 12817 female | brca1    |          | brca1 | primary tumor         | -        | 49 er_pos | pgr_neg | 4031 alive | -           |              |              | Spor 92 Cy5 |
| 14167 female | brca1    |          | brca1 | primary tumor         | -        | 41 er_pos | pgr_pos | 3425 alive | -           |              |              | Spor 93 Cy3 |
| 15267 female | brca1    |          | brca1 | primary tumor         | -        | 46 er_neg | pgr_neg | 1724 dead  | -           |              |              | Spor 93 Cy5 |
| 8545 female  | brca1    |          | brca1 | primary tumor         | -        | 47 er_neg | pgr_pos | 5825 alive | -           |              |              | Spor 94 Cy3 |
| 9366 female  | brca1    |          | brca1 | primary tumor         | -        | 36 er_neg | pgr_neg | 1813 dead  | -           |              |              | Spor 94 Cy5 |
| 10948 female | brca1    |          | brca1 | primary tumor         | -        | 75 er_pos | pgr_pos | 2174 dead  | -           |              |              | Spor 95 Cy3 |
| 7705 female  | brca1    |          | brca1 | primary tumor         | -        | 61 er_neg | pgr_neg | 5145 dead  | -           |              |              | Spor 95 Cy5 |
| 10392 female | brca1    |          | brca1 | primary tumor         | -        | 40 er_neg | pgr_neg | 1989 dead  | -           |              |              | Spor 96 Cy3 |
| 6814 female  | brca1    |          | brca1 | primary tumor         | -        | 26 er_neg | pgr_neg | 6564 alive | -           |              |              | Spor 96 Cy5 |
| 8593 female  | sporadic |          | -     | primary tumor         | -        | 74 er_pos | pgr_pos | 5527 dead  | -           |              |              | Spor 97 Cy3 |
| 9327 female  | ???      |          | ???   | recurrence_or_2nd_pri | -        | 34 -      | -       | 3294 dead  | -           |              |              | Spor 97 Cy5 |
| 12528 female | brca1    |          | brca1 | primary tumor         | -        | 49 er_neg | pgr_neg | 2303 dead  | -           |              |              | Spor 98 Cy3 |
| 9957 female  | brca1    |          | brca1 | primary tumor         | -        | 73 er_pos | pgr_pos | 5257 alive | -           |              |              | Spor 98 Cy5 |
| 14613 female | brca1    |          | brca1 | primary tumor         | -        | 58 er_pos | pgr_pos | 3213 alive | -           |              |              | Spor 99 Cy3 |
| 10605 female | brca1    |          | brca1 | primary tumor         | -        | 44 er_neg | pgr_neg | 328 dead   | -           |              |              | Spor 99 Cy5 |
| 6914 female  | brca1    |          | brca1 | primary tumor         | -        | 29 er_pos | pgr_neg | 5553 dead  | -           |              |              |             |
| 8363 female  | brca1    | brca1    | brca2 | primary tumor         | negative | 44 er_neg | pgr_neg | 1311 dead  | Basal       | Basal        | Basal        |             |
| 12232 female | brca1    | brca1    | brca1 | primary tumor         | -        | 68 er_pos | pgr_pos | 495 dead   | Luminal-A   | LumB         | LumB         |             |

|              |          |          |       |                       |          |           |         |            |             |              |              |
|--------------|----------|----------|-------|-----------------------|----------|-----------|---------|------------|-------------|--------------|--------------|
| 7063 female  | brca2    | brca2    | brca2 | primary tumor         | negative | 70 er_neg | pgr_neg | 1868 dead  | ERBB2       | HER2enriched | HER2enriched |
| 10905 female | brca1    | brca1    | brca1 | primary tumor         | negative | 51 er_neg | pgr_neg | 969 dead   | Basal       | Basal        | Basal        |
| 7353 female  | brcac    | brcac    | brcac | primary tumor         | -        | 55 er_pos | pgr_pos | 6316 alive | Luminal-A   | LumB         | LumA         |
| 11497 female | brcac    | brcac    | brcac | primary tumor         | -        | 45 er_neg | pgr_neg | 1234 dead  | Luminal-B   | HER2enriched | HER2enriched |
| 10850 female | brcac    | brcac    | brcac | primary tumor         | -        | 39 er_pos | pgr_pos | 4839 alive | Normal-like | LumA         | Normal       |
| 11368 female | brcac    |          | brcac | primary tumor         | -        | 50 er_pos | pgr_pos | 4627 alive | -           |              |              |
| 11900 female | brca2    | brca2    | brca2 | primary tumor         | negative | 27 er_neg | pgr_pos | 4403 alive | Luminal-B   | LumB         | LumB         |
| 14626 female | sporadic |          | -     | primary tumor         | -        | 57 er_neg | pgr_neg | 3208 alive | -           |              |              |
| 13996 female | brca1    | brca1    | brca1 | lymph_node            | negative | 52 er_neg | pgr_neg | 547 dead   | Basal       | Basal        | Basal        |
| 14807 female | brcac    | brcac    | brcac | primary tumor         | -        | 40 er_pos | pgr_pos | 3135 alive | Luminal-A   | LumB         | LumB         |
| 12505 female | brcac    | brcac    | brcac | primary tumor         | -        | 41 er_neg | pgr_neg | 1901 dead  | Luminal-B   | LumB         | HER2enriched |
| 11041 female | sporadic |          | -     | primary tumor         | -        | 55 er_neg | pgr_neg | 4748 alive | -           |              |              |
| 15526 female | brca2    | brca2    | brca2 | primary tumor         | negative | 60 er_neg | pgr_neg | 2821 alive | Basal       | Basal        | Basal        |
| 17438 female | brcac    |          | brcac | non_malignant_sample  | -        | 45 -      | -       | -          | Normal-like |              |              |
| 15016 female | brcac    | brcac    | brcac | primary tumor         | -        | 67 er_pos | pgr_pos | 3059 alive | Luminal-A   | LumA         | LumA         |
| 11130 female | brcac    | brcac    | brcac | primary tumor         | -        | 38 er_pos | pgr_pos | 1731 dead  | Luminal-A   | LumB         | LumB         |
| 16779 female | brcac    | brcac    | brcac | lymph_node            | -        | 66 er_neg | pgr_neg | 389 dead   | Basal       | Basal        | Basal        |
| 18099 female | sporadic |          | -     | primary tumor         | -        | 52 -      | -       | 1378 alive | -           |              |              |
| 9482 female  | sporadic | sporadic | -     | primary tumor         | negative | 46 er_pos | pgr_pos | 5448 alive | Luminal-B   | Unclassified | LumB         |
| 5715 female  | brcac    | brcac    | brcac | lymph_node            | -        | 34 er_neg | pgr_neg | 3833 dead  | ERBB2       | HER2enriched | HER2enriched |
| 4631 female  | brcac    | brcac    | brcac | primary tumor         | negative | 86 er_neg | pgr_neg | 210 dead   | Basal       | Basal        | Basal        |
| 8196 female  | brca1    | brca1    | brca1 | primary tumor         | negative | 51 er_neg | pgr_neg | 2046 dead  | Basal       | Basal        | Basal        |
| 12219 female | brcac    | brcac    | brcac | primary tumor         | -        | 40 er_pos | pgr_pos | 4284 alive | Luminal-A   | LumA         | LumA         |
| 13644 female | brcac    | brcac    | brcac | primary tumor         | -        | 85 er_pos | pgr_neg | 926 dead   | Luminal-B   | Unclassified | HER2enriched |
| 13325 female | brcac    | brcac    | brcac | primary tumor         | -        | 58 er_pos | pgr_neg | 933 dead   | Luminal-A   | LumB         | Unclassified |
| 5714 female  | brcac    | brcac    | brcac | primary tumor         | -        | 34 er_neg | pgr_neg | 3833 dead  | ERBB2       | HER2enriched | HER2enriched |
| 8080 female  | brcac    |          | brcac | primary tumor         | -        | 88 er_pos | pgr_pos | 1289 dead  | -           |              |              |
| 8522 female  | brcac    |          | brcac | primary tumor         | -        | 47 er_pos | pgr_pos | 1386 dead  | -           |              |              |
| 5799 female  | brcac    | brcac    | brca1 | lymph_node            | negative | 62 er_neg | pgr_neg | 1413 dead  | ERBB2       | HER2enriched | HER2enriched |
| 9252 female  | brca1    |          | brca1 | primary tumor         | negative | 36 er_neg | pgr_neg | 509 dead   | -           |              |              |
| 12532 female | brca1    | brca1    | brca1 | lymph_node            | negative | 33 -      | -       | 499 dead   | Basal       | Basal        | Basal        |
| 7513 female  | sporadic | sporadic | -     | primary tumor         | negative | 31 er_neg | pgr_neg | 6237 alive | Luminal-B   | HER2enriched | HER2enriched |
| 11043 female | brcac    |          | brcac | primary tumor         | -        | 28 er_pos | pgr_pos | 1997 dead  | -           |              |              |
| 9549 female  | brca1    |          | brca1 | primary tumor         | -        | 23 er_neg | pgr_neg | 5427 alive | -           |              |              |
| 12874 female | brcac    |          | brcac | non_malignant_sample  | -        | 43 -      | -       | 4003 alive | -           |              |              |
| 8655 female  | sporadic |          | -     | primary tumor         | -        | 42 er_neg | pgr_neg | 5796 alive | -           |              |              |
| 17080 female | brcac    | brcac    | brcac | primary tumor         | -        | 35 -      | -       | 2079 alive | Basal       | Basal        | Basal        |
| 6755 female  | brcac    | brcac    | brcac | primary tumor         | -        | 64 er_pos | pgr_pos | 2754 dead  | Luminal-A   | LumB         | LumB         |
| 11291 female | sporadic | sporadic | -     | primary tumor         | positive | 44 er_neg | pgr_neg | 1002 dead  | ERBB2       | Basal        | Basal        |
| 8984 female  | brcac    | brcac    | brcac | primary tumor         | -        | 35 er_pos | pgr_neg | 1837 dead  | ERBB2       | Normal       | HER2enriched |
| 15243 female | brca2    |          | brca2 | primary tumor         | -        | 63 er_pos | pgr_neg | 502 dead   | -           |              |              |
| 16238 female | brca2    | brca2    | brca2 | primary tumor         | negative | 34 er_pos | pgr_pos | 2040 dead  | Luminal-A   | LumB         | LumB         |
| 15401 female | brcac    | brcac    | brcac | primary tumor         | -        | 57 er_pos | pgr_neg | 2886 alive | Luminal-A   | LumA         | LumA         |
| 16730 female | brca1    | brca1    | brca1 | primary tumor         | negative | 50 er_neg | pgr_neg | 2297 alive | ERBB2       | Basal        | Basal        |
| 16326 female | brcac    | brcac    | brcac | primary tumor         | negative | 50 er_pos | pgr_neg | 2472 alive | Luminal-B   | Unclassified | Basal        |
| 10511 female | brcac    | brcac    | brca2 | primary tumor         | -        | 53 er_pos | pgr_neg | 4992 alive | Luminal-A   | LumA         | LumA         |
| 17077 female | brcac    | brcac    | brcac | primary tumor         | -        | 44 -      | -       | 729 dead   | ERBB2       | Normal       | Normal       |
| 16642 female | brca1    | brca1    | brca1 | recurrence_or_2nd_pri | negative | 59 er_neg | pgr_neg | 1204 dead  | ERBB2       | Basal        | Basal        |
| 10463 female | brcac    | brcac    | brcac | primary tumor         | -        | 50 er_neg | pgr_neg | 1997 dead  | ERBB2       | Basal        | Basal        |
| 16268 female | brcac    | brcac    | brcac | primary tumor         | -        | 34 er_pos | pgr_pos | 2507 alive | Luminal-A   | LumA         | LumA         |
| 16482 female | brcac    |          | brcac | primary tumor         | -        | 77 er_pos | pgr_pos | 2402 alive | -           |              |              |
| 12346 female | brcac    |          | brcac | non_malignant_sample  | -        | 63 -      | -       | 4168 alive | -           |              |              |

|              |          |          |        |                      |          |           |         |            |             |              |              |
|--------------|----------|----------|--------|----------------------|----------|-----------|---------|------------|-------------|--------------|--------------|
| 16474 female | brcac    | brcac    | brcac  | recurrence tumor     | -        | 54 er_pos | pgr_pos | 2410 alive | Luminal-A   | LumB         | LumB         |
| 8572 female  | brcac    |          | brcac  | lymph_node           | -        | 52 er_neg | pgr_neg | 707 dead   | -           |              |              |
| 17122 female | brcac    | brcac    | brcac  | primary tumor        | -        | 36 -      | -       | 1274 dead  | Luminal-A   | LumB         | LumB         |
| 4477 female  | brcac    |          | brca1  | primary tumor        | -        | 57 er_pos | pgr_neg | 55 dead    | -           |              |              |
| 10776 female | brcac    | brcac    | brcac  | primary tumor        | -        | 55 er_pos | pgr_pos | 4867 alive | Luminal-A   | Normal       | LumA         |
| 3007 female  | CDKN2A   | CDKN2A   | CDKN2A | recurrence tumor     | -        | 61 er_neg | pgr_neg | 670 dead   | ERBB2       | HER2enriched | HER2enriched |
| 1843 female  | brca1    |          | brca1  | primary tumor        | -        | 40 er_pos | pgr_pos | 1222 dead  | -           |              |              |
| 8571 female  | brca1    | brca1    | brca1  | primary tumor        | negative | 46 er_neg | pgr_neg | 2870 dead  | ERBB2       | Basal        | Basal        |
| 10253 female | brcac    | brcac    | brcac  | primary tumor        | negative | 49 er_pos | pgr_pos | 2745 dead  | Normal-like | Normal       | Normal       |
| 9169 female  | brcac    | normal   | brca1  | non_malignant_sample | negative | 33 er_neg | pgr_neg | -          | Normal-like | Basal        | Normal       |
| 10329 female | brcac    | brcac    | brcac  | primary tumor        | -        | 40 er_pos | pgr_neg | 5069 alive | Luminal-B   | HER2enriched | HER2enriched |
| 11697 female | brcac    | brcac    | brcac  | primary tumor        | -        | 40 er_neg | pgr_neg | 215 dead   | ERBB2       | HER2enriched | HER2enriched |
| 9278 female  | brca1    | brca1    | brca1  | primary tumor        | negative | 56 er_pos | pgr_pos | 5520 dead  | Luminal-A   | LumA         | LumA         |
| 16808 female | brcac    | brcac    | brcac  | primary tumor        | -        | 64 er_pos | pgr_neg | 2242 alive | Normal-like | Normal       | Normal       |
| 13414 female | brcac    |          | brcac  | recurrence tumor     | -        | 62 er_neg | pgr_pos | 1897 dead  | -           |              |              |
| 15564 female | brcac    | brcac    | brcac  | recurrence tumor     | -        | 46 er_pos | pgr_pos | 2802 alive | Luminal-A   | LumA         | LumA         |
| 14315 female | brcac    |          | brcac  | recurrence tumor     | -        | 45 er_neg | pgr_neg | 395 dead   | -           |              |              |
| 12054 female | brca1    |          | brca1  | primary tumor        | negative | 38 er_neg | pgr_neg | 1405 dead  | -           |              |              |
| 17405 female | brca1    | brca1    | brca1  | primary tumor        | -        | 28 -      | -       | 1843 alive | Normal-like | Normal       | Normal       |
| 10359 female | brca1    | normal   | brca1  | non_malignant_sample | -        | 37 er_neg | pgr_pos | 5063 alive | Normal-like | Normal       | Normal       |
| 17271 female | brcac    | brcac    | brcac  | primary tumor        | -        | 52 -      | -       | 1955 alive | Luminal-A   | LumB         | LumB         |
| 15388 female | brca1    |          | brca1  | primary tumor        | -        | 43 er_neg | pgr_neg | 455 dead   | -           |              |              |
| 12727 female | brca1    | brca1    | brca1  | primary tumor        | negative | 61 er_neg | pgr_neg | 1051 dead  | Basal       | Basal        | Basal        |
| 10320 female | brcac    | brcac    | brcac  | primary tumor        | -        | 62 er_pos | pgr_neg | 2391 dead  | Luminal-A   | Unclassified | LumA         |
| 12364 female | brcac    | brcac    | brcac  | primary tumor        | positive | 36 er_neg | pgr_neg | 4223 alive | Basal       | Basal        | Basal        |
| 14171 female | brca1    | brca1    | brca1  | primary tumor        | negative | 52 er_pos | pgr_neg | 2951 dead  | Luminal-B   | LumB         | LumB         |
| 14659 female | brcac    | brcac    | brcac  | primary tumor        | -        | 74 er_pos | pgr_pos | 3192 alive | Luminal-A   | LumA         | LumA         |
| 14767 female | brca2    | brca2    | brca2  | primary tumor        | negative | 57 er_pos | pgr_pos | 2194 dead  | Luminal-A   | LumA         | LumA         |
| 11247 female | brcac    |          | brcac  | primary tumor        | -        | 46 er_pos | pgr_pos | 4674 alive | -           |              |              |
| 10344 female | brca1    |          | brca1  | primary tumor        | -        | 40 er_neg | pgr_neg | 489 dead   | -           |              |              |
| 5241 female  | brca1    | brca1    | brca1  | primary tumor        | negative | 43 er_neg | pgr_neg | 5948 dead  | Normal-like | Normal       | Normal       |
| 11778 female | brca1    |          | brca1  | non_malignant_sample | -        | 39 -      | -       | 1840 dead  | -           |              |              |
| 8601 female  | brcac    |          | brcac  | primary tumor        | -        | 35 er_pos | pgr_pos | 5823 alive | -           |              |              |
| 1476 female  | brca1    |          | brca1  | primary tumor        | -        | 44 er_neg | pgr_neg | 4363 dead  | -           |              |              |
| 15766 female | brcac    | brcac    | brcac  | primary tumor        | -        | 61 er_neg | pgr_neg | 1359 dead  | Luminal-B   | HER2enriched | HER2enriched |
| 6753 female  | brcac    | brcac    | brcac  | primary tumor        | -        | 64 er_pos | pgr_pos | 3073 dead  | Luminal-A   | LumB         | LumA         |
| 17372 female | brcac    | brcac    | brcac  | primary tumor        | -        | 44 -      | -       | 1156 dead  | Luminal-B   | Unclassified | Unclassified |
| 14317 female | brcac    | brcac    | brcac  | lymph_node           | -        | 62 er_pos | pgr_pos | 1567 dead  | Luminal-B   | HER2enriched | LumB         |
| 7178 female  | brca1    | brca1    | brca1  | recurrence tumor     | negative | 44 -      | -       | 43 dead    | Basal       | Basal        | Basal        |
| 16804 female | brcac    | brcac    | brcac  | primary tumor        | -        | 35 er_neg | pgr_pos | 2241 alive | Normal-like | Unclassified | Unclassified |
| 10865 female | brcac    | brcac    | brcac  | primary tumor        | -        | 61 er_neg | pgr_neg | 4816 alive | Luminal-B   | HER2enriched | HER2enriched |
| 16481 female | brcac    | brcac    | brcac  | primary tumor        | negative | 77 er_pos | pgr_pos | 2402 alive | Luminal-B   | LumB         | LumB         |
| 7650 female  | brcac    | brcac    | brcac  | primary tumor        | -        | 45 er_neg | pgr_neg | 6196 alive | Luminal-A   | LumA         | LumA         |
| 10785 female | brcac    | brcac    | brcac  | primary tumor        | -        | 74 er_neg | pgr_neg | 808 dead   | ERBB2       | HER2enriched | HER2enriched |
| 15504 female | brca1    | brca1    | brca1  | primary tumor        | negative | 73 er_neg | pgr_neg | 2828 alive | Basal       | Basal        | Basal        |
| 15478 female | brcac    | brcac    | brcac  | primary tumor        | -        | 57 er_pos | pgr_pos | 2842 alive | Luminal-A   | LumA         | LumA         |
| 15752 female | brcac    | brcac    | brcac  | primary tumor        | -        | 50 er_neg | pgr_neg | 2732 alive | ERBB2       | HER2enriched | Normal       |
| 17290 female | brca1    | brca1    | brca1  | primary tumor        | negative | 53 er_neg | pgr_neg | 1931 alive | Basal       | Basal        | Basal        |
| 15143 female | sporadic | sporadic | -      | primary tumor        | -        | 68 er_pos | pgr_pos | 2976 alive | Luminal-A   | LumB         | LumB         |
| 11101 female | brcac    |          | brcac  | primary tumor        | -        | 37 -      | -       | 4732 alive | -           |              |              |
| 8648 female  | brca2    | brca2    | brca2  | primary tumor        | negative | 28 er_neg | pgr_neg | 733 dead   | Luminal-A   | LumB         | LumB         |
| 12530 female | brca1    | brca1    | brca1  | recurrence tumor     | -        | 39 er_neg | pgr_neg | 2613 dead  | Basal       | Basal        | Basal        |



|              |          |          |       |                       |          |           |         |            |             |              |              |
|--------------|----------|----------|-------|-----------------------|----------|-----------|---------|------------|-------------|--------------|--------------|
| 12578 female | brcac    | brcac    | brcac | primary tumor         | -        | 46 er_neg | pgr_pos | 985 dead   | Normal-like | Normal       | Normal       |
| 17179 female | brcac    | brcac    | brcac | primary tumor         | -        | 40 -      | -       | 2004 alive | Basal       | Basal        | Basal        |
| 17522 female | brcac    | brcac    | brcac | primary tumor         | negative | 66 -      | -       | 1777 alive | Basal       | Basal        | Basal        |
| 7720 female  | sporadic | sporadic | -     | primary tumor         | positive | 44 er_neg | pgr_neg | 6175 alive | Basal       | Basal        | Basal        |
| 12577 female | brcac    | brcac    | brcac | primary tumor         | -        | 46 er_pos | pgr_pos | 985 dead   | Luminal-A   | LumB         | LumB         |
| 6605 female  | sporadic | sporadic | -     | primary tumor         | positive | 37 er_neg | pgr_neg | 6678 alive | Basal       | Basal        | Basal        |
| 10657 female | brcac    | brcac    | brcac | primary tumor         | negative | 50 er_pos | pgr_pos | 4930 alive | Luminal-A   | LumA         | LumB         |
| 13812 female | brca1    | brca1    | brca1 | primary tumor         | negative | 47 er_neg | pgr_neg | 3584 alive | ERBB2       | Basal        | Basal        |
| 14803 female | brcac    | brcac    | brcac | primary tumor         | -        | 48 er_pos | pgr_pos | 3138 alive | Luminal-A   | LumB         | LumB         |
| 10581 female | brca1    | brca1    | brca1 | primary tumor         | negative | 59 er_neg | pgr_neg | 2162 dead  | Basal       | Basal        | Basal        |
| 14616 male   | brca2    | brca2    | brca2 | primary tumor         | -        | 85 er_pos | pgr_pos | 1041 dead  | Luminal-B   | LumB         | LumB         |
| 6023 female  | brca1    | brca1    | brca1 | primary tumor         | negative | 35 er_neg | pgr_neg | 2380 dead  | Basal       | Basal        | Basal        |
| 7223 female  | brcac    | brcac    | brcac | primary tumor         | negative | 45 er_pos | pgr_neg | 1009 dead  | Luminal-B   | LumB         | LumB         |
| 14920 female | brca1    |          | brca1 | non_malignant_sample  | negative | 40 er_neg | pgr_neg | -          | -           | -            | -            |
| 13714 female | brca1    | brca1    | brca1 | primary tumor         | negative | 48 er_neg | pgr_neg | 406 dead   | Basal       | Basal        | Basal        |
| 12994 female | brcac    | brcac    | brcac | primary tumor         | negative | 65 er_neg | pgr_neg | 3957 alive | ERBB2       | Basal        | Basal        |
| 11577 female | brcac    |          | brcac | recurrence tumor      | -        | 32 er_pos | pgr_pos | 4531 alive | -           | -            | -            |
| 12224 female | brca1    | brca1    | brca1 | primary tumor         | negative | 38 er_neg | pgr_neg | 2725 dead  | Basal       | Basal        | Basal        |
| 11808 female | brca1    | brca1    | brca1 | primary tumor         | negative | 38 er_neg | pgr_neg | 4444 alive | Basal       | Basal        | Basal        |
| 14510 female | brca1    | brca1    | brca1 | primary tumor         | -        | 40 er_neg | pgr_neg | 3264 alive | Basal       | Basal        | Basal        |
| 9053 female  | brcac    | brcac    | brcac | recurrence_or_2nd_pri | -        | 38 er_neg | pgr_pos | 5630 alive | Luminal-A   | Normal       | LumA         |
| 14007 female | brca1    |          | brca1 | primary tumor         | -        | 33 er_neg | pgr_neg | 3488 alive | -           | -            | -            |
| 16723 female | brcac    |          | brcac | primary tumor         | -        | 43 er_neg | pgr_neg | 2296 alive | -           | -            | -            |
| 10683 female | brcac    | brcac    | brcac | recurrence tumor      | -        | 37 er_pos | pgr_pos | 1920 dead  | Luminal-A   | LumA         | Unclassified |
| 9700 female  | brcac    | brcac    | brcac | primary tumor         | -        | 55 er_pos | pgr_pos | 4384 dead  | Luminal-A   | Normal       | Normal       |
| 10886 female | brcac    | brcac    | brcac | primary tumor         | -        | 50 er_pos | pgr_pos | 2649 dead  | Luminal-A   | LumB         | LumA         |
| 11186 female | sporadic | sporadic | -     | primary tumor         | -        | 45 er_pos | pgr_pos | 4699 alive | Luminal-A   | LumA         | Normal       |
| 12082 female | brcac    |          | brcac | primary tumor         | -        | 39 er_pos | pgr_pos | 4335 alive | -           | -            | -            |
| 8228 female  | brcac    | brcac    | brcac | primary tumor         | -        | 39 er_neg | pgr_pos | 5971 alive | Normal-like | Normal       | Normal       |
| 15655 female | brca1    | brca1    | brca1 | primary tumor         | negative | 28 er_neg | pgr_neg | 2765 alive | Basal       | Basal        | Basal        |
| 10360 female | brca1    |          | brca1 | non_malignant_sample  | -        | 37 er_neg | pgr_pos | 5063 alive | -           | -            | -            |
| 14316 female | brcac    | brcac    | brcac | primary tumor         | negative | 62 er_pos | pgr_pos | 1567 dead  | Luminal-B   | Unclassified | HER2enriched |
| 17460 female | brcac    | brcac    | brcac | primary tumor         | -        | 40 -      | -       | 1805 alive | Luminal-A   | LumA         | LumA         |
| 7592 female  | brcac    | brcac    | brcac | primary tumor         | -        | 44 er_pos | pgr_pos | 6217 alive | Luminal-A   | Normal       | Unclassified |
| 16534 female | brcac    | brcac    | brcac | primary tumor         | -        | 55 er_pos | pgr_pos | -          | Luminal-B   | LumA         | LumA         |
| 12314 female | brcac    | brcac    | brcac | primary tumor         | -        | 35 er_pos | pgr_pos | 4242 alive | Luminal-A   | LumA         | LumA         |
| 13091 female | brcac    |          | brcac | primary tumor         | -        | 42 er_pos | pgr_pos | 3913 alive | -           | -            | -            |
| 16821 female | brcac    | brcac    | brcac | primary tumor         | -        | 49 er_pos | pgr_pos | 2233 alive | Luminal-A   | LumB         | LumB         |
| 17490 female | brca2    |          | brca2 | non_malignant_sample  | -        | 35 -      | -       | -          | Normal-like | -            | -            |
| 13183 female | brcac    | brcac    | brca2 | primary tumor         | -        | 61 er_pos | pgr_neg | 3876 alive | Luminal-B   | LumB         | LumB         |
| 9601 female  | brcac    | brcac    | brcac | primary tumor         | negative | 68 er_pos | pgr_neg | 5391 alive | Normal-like | Normal       | Normal       |
| 14830 female | brcac    | brcac    | brcac | primary tumor         | negative | 41 er_neg | pgr_neg | 954 dead   | Basal       | Basal        | Basal        |
| 16684 female | brcac    | brcac    | brcac | primary tumor         | -        | 42 er_pos | pgr_pos | 2320 alive | Luminal-A   | LumA         | LumA         |
| 16889 female | brcac    | brcac    | brcac | primary tumor         | -        | 35 er_neg | pgr_pos | 1694 dead  | ERBB2       | Unclassified | LumB         |
| 17439 female | brcac    |          | brcac | non_malignant_sample  | -        | 45 -      | -       | -          | Normal-like | -            | -            |
| 13442 female | brcac    | brcac    | brcac | primary tumor         | -        | 43 er_pos | pgr_neg | 3745 alive | Luminal-A   | Unclassified | Unclassified |
| 15765 female | brcac    | brcac    | brcac | primary tumor         | -        | 61 er_pos | pgr_neg | 1359 dead  | Luminal-A   | LumA         | LumA         |
| 11787 female | brca2    | brca2    | brca2 | primary tumor         | negative | 54 er_pos | pgr_neg | 4447 alive | Luminal-A   | LumB         | LumB         |
| 6150 female  | brcac    | brcac    | brcac | primary tumor         | -        | 55 er_pos | pgr_pos | 2576 dead  | Luminal-A   | LumA         | LumA         |
| 12237 female | brcac    | brcac    | brcac | primary tumor         | positive | 77 er_neg | pgr_neg | 86 dead    | Basal       | Basal        | Basal        |
| 14090 female | brca1    | brca1    | brca1 | primary tumor         | negative | 58 er_neg | pgr_neg | 3465 alive | Normal-like | Normal       | Normal       |
| 11736 female | brcac    | brcac    | brcac | lymph_node            | negative | 65 er_neg | pgr_neg | 4472 alive | Basal       | Basal        | Basal        |

|              |          |       |       |                  |          |           |         |            |             |              |        |
|--------------|----------|-------|-------|------------------|----------|-----------|---------|------------|-------------|--------------|--------|
| 10029 female | brca1    | brca1 | brca1 | primary tumor    | -        | 44 er_neg | pgr_neg | 486 dead   | Basal       | Basal        | Basal  |
| 6874 female  | brca1    | brca1 | brca1 | recurrence tumor | -        | 49 er_neg | pgr_pos | 6540 alive | Normal-like | Normal       | Normal |
| 9632 female  | ???      | ???   | ???   | primary tumor    | -        | 60 er_pos | pgr_neg | 5377 alive | -           | -            | -      |
| 11721 female | brca2    |       | brca2 | primary tumor    | -        | 28 er_pos | pgr_neg | 439 dead   | -           | -            | -      |
| 10697 female | brca1    |       | brca1 | primary tumor    | -        | 41 er_neg | pgr_neg | 1824 dead  | -           | -            | -      |
| 11283 female | brca1    | brca1 | brca1 | primary tumor    | negative | 29 er_neg | pgr_neg | 4656 alive | Basal       | Basal        | Basal  |
| 15050 female | brca1    | brca1 | brca1 | primary tumor    | -        | 71 er_pos | pgr_pos | -          | Luminal-A   | Unclassified | LumB   |
| 4594 female  | brca1    | brca1 | brca1 | primary tumor    | -        | 70 er_pos | pgr_pos | 6513 dead  | Luminal-A   | LumA         | LumA   |
| 9153 female  | brca1    | brca1 | brca1 | primary tumor    | -        | 46 er_pos | pgr_pos | 5586 alive | Luminal-A   | LumA         | LumA   |
| 18090 female | sporadic | -     | -     | primary tumor    | -        | 78 -      | -       | 281 dead   | -           | -            | -      |
