# Supplementary material for: Proteomic analysis of breast tumors confirms the mRNA intrinsic molecular subtypes using different classifiers: a large-scale analysis of fresh frozen tissue samples
Source: Springer Nature journal article supplement (doi:10.1186/s13058-016-0732-2), 2016-06-29
Supplement: MOESM2 [file 10305388]

| Cancer No | Patient_sex | HBC sample type | Tumor info -> | Sample type   | BRCA1 promotor methylation | ER_status | PgR_status | Expressions data -> | Sörlie subtype classified | Best Hu      | Best PAM50   |
|-----------|-------------|-----------------|---------------|---------------|----------------------------|-----------|------------|---------------------|---------------------------|--------------|--------------|
| 17613     | female      | brca1           | Tumor info -> | primary tumor | negative                   | -         | -          | Expressions data -> | Basal                     | Basal        | Basal        |
| 17290     | female      | brca1           | Tumor info -> | primary tumor | negative                   | er_neg    | pgr_neg    | Expressions data -> | Basal                     | Basal        | Basal        |
| 5815      | female      | sporadic        | Tumor info -> | primary tumor | -                          | er_neg    | pgr_neg    | Expressions data -> | Basal                     | Basal        | Basal        |
| 6871      | female      | sporadic        | Tumor info -> | primary tumor | -                          | er_neg    | pgr_neg    | Expressions data -> | Basal                     | Basal        | Basal        |
| 12237     | female      | brcac           | Tumor info -> | primary tumor | positive                   | er_neg    | pgr_neg    | Expressions data -> | Basal                     | Basal        | Basal        |
| 9047      | female      | sporadic        | Tumor info -> | primary tumor | positive                   | er_neg    | pgr_neg    | Expressions data -> | Basal                     | Basal        | Basal        |
| 6979      | female      | sporadic        | Tumor info -> | primary tumor | negative                   | er_neg    | pgr_neg    | Expressions data -> | Basal                     | Basal        | Basal        |
| 11822     | female      | sporadic        | Tumor info -> | primary tumor | positive                   | er_neg    | pgr_neg    | Expressions data -> | Basal                     | Basal        | Basal        |
| 8363      | female      | brcac           | Tumor info -> | primary tumor | negative                   | er_neg    | pgr_neg    | Expressions data -> | Basal                     | Basal        | Basal        |
| 15526     | female      | brca2           | Tumor info -> | primary tumor | negative                   | er_neg    | pgr_neg    | Expressions data -> | Basal                     | Basal        | Basal        |
| 4631      | female      | brcac           | Tumor info -> | primary tumor | negative                   | er_neg    | pgr_neg    | Expressions data -> | Basal                     | Basal        | Basal        |
| 17080     | female      | brcac           | Tumor info -> | primary tumor | -                          | -         | -          | Expressions data -> | Basal                     | Basal        | Basal        |
| 13714     | female      | brca1           | Tumor info -> | primary tumor | negative                   | er_neg    | pgr_neg    | Expressions data -> | Basal                     | Basal        | Basal        |
| 12224     | female      | brca1           | Tumor info -> | primary tumor | negative                   | er_neg    | pgr_neg    | Expressions data -> | Basal                     | Basal        | Basal        |
| 14510     | female      | brca1           | Tumor info -> | primary tumor | -                          | er_neg    | pgr_neg    | Expressions data -> | Basal                     | Basal        | Basal        |
| 11697     | female      | brcac           | Tumor info -> | primary tumor | -                          | er_neg    | pgr_neg    | Expressions data -> | ERBB2                     | HER2enriched | HER2enriched |
| 10785     | female      | brcac           | Tumor info -> | primary tumor | -                          | er_neg    | pgr_neg    | Expressions data -> | ERBB2                     | HER2enriched | HER2enriched |
| 10656     | female      | sporadic        | Tumor info -> | primary tumor | -                          | er_neg    | pgr_neg    | Expressions data -> | ERBB2                     | HER2enriched | HER2enriched |
| 10925     | female      | sporadic        | Tumor info -> | primary tumor | negative                   | er_neg    | pgr_neg    | Expressions data -> | ERBB2                     | HER2enriched | HER2enriched |
| 10921     | female      | sporadic        | Tumor info -> | primary tumor | negative                   | er_neg    | pgr_neg    | Expressions data -> | ERBB2                     | HER2enriched | HER2enriched |
| 5714      | female      | brcac           | Tumor info -> | primary tumor | -                          | er_neg    | pgr_neg    | Expressions data -> | ERBB2                     | HER2enriched | HER2enriched |
| 16684     | female      | brcac           | Tumor info -> | primary tumor | -                          | er_pos    | pgr_pos    | Expressions data -> | Luminal-A                 | LumA         | LumA         |
| 15765     | female      | brcac           | Tumor info -> | primary tumor | -                          | er_pos    | pgr_neg    | Expressions data -> | Luminal-A                 | LumA         | LumA         |
| 7747      | female      | brcac           | Tumor info -> | primary tumor | -                          | er_pos    | pgr_pos    | Expressions data -> | Luminal-A                 | LumA         | LumA         |
| 10511     | female      | brcac           | Tumor info -> | primary tumor | -                          | er_pos    | pgr_neg    | Expressions data -> | Luminal-A                 | LumA         | LumA         |
| 16268     | female      | brcac           | Tumor info -> | primary tumor | -                          | er_pos    | pgr_pos    | Expressions data -> | Luminal-A                 | LumA         | LumA         |
| 6150      | female      | brcac           | Tumor info -> | primary tumor | -                          | er_pos    | pgr_pos    | Expressions data -> | Luminal-A                 | LumA         | LumA         |
| 10339     | female      | sporadic        | Tumor info -> | primary tumor | -                          | er_pos    | pgr_pos    | Expressions data -> | Luminal-A                 | LumA         | LumA         |
| 9704      | female      | sporadic        | Tumor info -> | primary tumor | -                          | er_pos    | pgr_neg    | Expressions data -> | Luminal-A                 | LumA         | LumA         |
| 15401     | female      | brcac           | Tumor info -> | primary tumor | -                          | er_pos    | pgr_neg    | Expressions data -> | Luminal-A                 | LumA         | LumA         |
| 9153      | female      | brcac           | Tumor info -> | primary tumor | -                          | er_pos    | pgr_pos    | Expressions data -> | Luminal-A                 | LumA         | LumA         |
| 9665      | female      | brcac           | Tumor info -> | primary tumor | -                          | er_pos    | pgr_pos    | Expressions data -> | Luminal-A                 | LumA         | LumA         |
| 10549     | female      | sporadic        | Tumor info -> | primary tumor | -                          | er_pos    | pgr_pos    | Expressions data -> | Luminal-A                 | LumA         | LumA         |
| 10430     | female      | sporadic        | Tumor info -> | primary tumor | -                          | er_pos    | pgr_pos    | Expressions data -> | Luminal-A                 | LumA         | LumA         |
| 9019      | female      | sporadic        | Tumor info -> | primary tumor | -                          | er_pos    | pgr_pos    | Expressions data -> | Luminal-A                 | LumA         | LumA         |
| 11900     | female      | brca2           | Tumor info -> | primary tumor | negative                   | er_neg    | pgr_pos    | Expressions data -> | Luminal-B                 | LumB         | LumB         |
| 16481     | female      | brcac           | Tumor info -> | primary tumor | negative                   | er_pos    | pgr_pos    | Expressions data -> | Luminal-B                 | LumB         | LumB         |
| 9482      | female      | sporadic        | Tumor info -> | primary tumor | negative                   | er_pos    | pgr_pos    | Expressions data -> | Luminal-B                 | Unclassified | LumB         |
| 9846      | female      | sporadic        | Tumor info -> | primary tumor | negative                   | er_pos    | pgr_pos    | Expressions data -> | Luminal-B                 | Unclassified | LumB         |
| 9601      | female      | brcac           | Tumor info -> | primary tumor | negative                   | er_pos    | pgr_neg    | Expressions data -> | Normal-like               | Normal       | Normal       |
| 14090     | female      | brca1           | Tumor info -> | primary tumor | negative                   | er_neg    | pgr_neg    | Expressions data -> | Normal-like               | Normal       | Normal       |
| 6514      | female      | sporadic        | Tumor info -> | primary tumor | -                          | er_neg    | pgr_neg    | Expressions data -> | Normal-like               | Normal       | Normal       |
| 16808     | female      | brcac           | Tumor info -> | primary tumor | -                          | er_pos    | pgr_neg    | Expressions data -> | Normal-like               | Normal       | Normal       |
