# Supplementary material for: Proteomic analysis of breast tumors confirms the mRNA intrinsic molecular subtypes using different classifiers: a large-scale analysis of fresh frozen tissue samples
Source: Springer Nature journal article supplement (doi:10.1186/s13058-016-0732-2), 2016-06-29
Supplement: MOESM3 [file 10305388]

| Majority Protein IDs     | Protein Descriptions                                                                                                    | PEP      | Confidence score |
|--------------------------|-------------------------------------------------------------------------------------------------------------------------|----------|------------------|
| A0AV96                   | RBM47_HUMAN RNA-binding protein 47 OS=Homo sapiens GN=RBM47 PE=1 SV=2                                                   |          |                  |
| A0AV96-2                 | RBM47_HUMAN Isoform 2 of RNA-binding protein 47 OS=Homo sapiens GN=RBM47                                                |          |                  |
| A0AVF1                   | TTC26_HUMAN Tetratricopeptide repeat protein 26 OS=Homo sapiens GN=TTC26 PE=2 SV=1                                      |          |                  |
| A0AVK6                   | E2F8_HUMAN Transcription factor E2F8 OS=Homo sapiens GN=E2F8 PE=1 SV=1                                                  |          | 21.98            |
| A0AVT1;A0AVT1-2          | UBA6_HUMAN Ubiquitin-like modifier-activating enzyme 6 OS=Homo sapiens GN=UBA6 PE=1 SV=1;>sp A0AVT1-2 UBA6_HUMAN Iso    | 3.35E-71 |                  |
| A0FGR8                   | ESYT2_HUMAN Extended synaptotagmin-2 OS=Homo sapiens GN=ESYT2 PE=1 SV=1                                                 |          | 203.23           |
| A0FGR8-2                 | ESYT2_HUMAN Isoform 2 of Extended synaptotagmin-2 OS=Homo sapiens GN=ESYT2                                              |          | 255.1            |
| A0FGR8-4                 | ESYT2_HUMAN Isoform 4 of Extended synaptotagmin-2 OS=Homo sapiens GN=ESYT2                                              |          | 127.29           |
| A0FGR8-5                 | ESYT2_HUMAN Isoform 5 of Extended synaptotagmin-2 OS=Homo sapiens GN=ESYT2                                              |          | 75.94            |
| A0FGR8-6                 | ESYT2_HUMAN Isoform 6 of Extended synaptotagmin-2 OS=Homo sapiens GN=ESYT2                                              |          | 203.23           |
| A0M8Q6                   | LAC7_HUMAN Ig lambda-7 chain C region OS=Homo sapiens GN=IGLC7 PE=1 SV=2                                                |          | 64.41            |
| A0MZ66-3;A0MZ66;A0MZ66-1 | SHOT1_HUMAN Isoform 3 of Shootin-1 OS=Homo sapiens GN=KIAA1598;>sp A0MZ66 SHOT1_HUMAN Shootin-1 OS=Homo sapien          | 2.41E-83 |                  |
| A1L0T0                   | ILVBL_HUMAN Acetolactate synthase-like protein OS=Homo sapiens GN=ILVBL PE=1 SV=2                                       |          |                  |
| A1L0T0-2                 | ILVBL_HUMAN Isoform 2 of Acetolactate synthase-like protein OS=Homo sapiens GN=ILVBL                                    |          |                  |
| A1L0T0;A1L0T0-2          | ILVBL_HUMAN Acetolactate synthase-like protein OS=Homo sapiens GN=ILVBL PE=1 SV=2;>sp A1L0T0-2 ILVBL_HUMAN Isoform 2 of | 1.80E-13 |                  |
| A1X283                   | SPD2B_HUMAN SH3 and PX domain-containing protein 2B OS=Homo sapiens GN=SH3PXD2B PE=1 SV=3                               |          |                  |
| A2A2Z9                   | AN18B_HUMAN Ankyrin repeat domain-containing protein 18B OS=Homo sapiens GN=ANKRD18B PE=2 SV=1                          |          |                  |
| A2A3N6                   | PIPSL_HUMAN Putative PIP5K1A and PSMD4-like protein OS=Homo sapiens GN=PIPSL PE=5 SV=1                                  |          | 47.9             |
| A2BFH1                   | PAL4G_HUMAN Peptidylprolyl cis-trans isomerase A-like 4G OS=Homo sapiens GN=PPIAL4G PE=2 SV=1                           |          | 39.92            |
| A2RRP1                   | NBAS_HUMAN Neuroblastoma-amplified sequence OS=Homo sapiens GN=NBAS PE=1 SV=2                                           |          |                  |
| A2RRP1-2                 | NBAS_HUMAN Isoform 2 of Neuroblastoma-amplified sequence OS=Homo sapiens GN=NBAS                                        |          |                  |
| A2RTX5                   | SYTC2_HUMAN Probable threonyl-tRNA synthetase 2, cytoplasmic OS=Homo sapiens GN=TARSL2 PE=1 SV=1                        |          | 97.77            |
| A2RTX5-2                 | SYTC2_HUMAN Isoform 2 of Probable threonyl-tRNA synthetase 2, cytoplasmic OS=Homo sapiens GN=TARSL2                     |          | 97.77            |
| A2RTY3                   | CQ066_HUMAN Uncharacterized protein C17orf66 OS=Homo sapiens GN=C17orf66 PE=2 SV=2                                      |          |                  |
| A2RTY3-2                 | CQ066_HUMAN Isoform 2 of Uncharacterized protein C17orf66 OS=Homo sapiens GN=C17orf66                                   |          |                  |
| A2RTY3-3                 | CQ066_HUMAN Isoform 3 of Uncharacterized protein C17orf66 OS=Homo sapiens GN=C17orf66                                   |          |                  |
| A2RTY3-4                 | CQ066_HUMAN Isoform 4 of Uncharacterized protein C17orf66 OS=Homo sapiens GN=C17orf66                                   |          |                  |
| A2RTY3-5                 | CQ066_HUMAN Isoform 5 of Uncharacterized protein C17orf66 OS=Homo sapiens GN=C17orf66                                   |          |                  |
| A2RU54                   | HMX2_HUMAN Homeobox protein HMX2 OS=Homo sapiens GN=HMX2 PE=2 SV=1                                                      |          |                  |
| A2RUR9                   | C144A_HUMAN Coiled-coil domain-containing protein 144A OS=Homo sapiens GN=CCDC144A PE=1 SV=1                            |          |                  |
| A2RUR9-2                 | C144A_HUMAN Isoform 2 of Coiled-coil domain-containing protein 144A OS=Homo sapiens GN=CCDC144A                         |          |                  |
| A2RUR9-3                 | C144A_HUMAN Isoform 3 of Coiled-coil domain-containing protein 144A OS=Homo sapiens GN=CCDC144A                         |          |                  |
| A3KMH1;A3KMH1-3;A3KMH1-1 | K0564_HUMAN Uncharacterized protein KIAA0564 OS=Homo sapiens GN=KIAA0564 PE=1 SV=2;>sp A3KMH1-3 K0564_HUMAN Isofc       | 5.56E-33 |                  |
| A4D0V7                   | CG058_HUMAN Uncharacterized protein C7orf58 OS=Homo sapiens GN=C7orf58 PE=2 SV=1                                        |          |                  |
| A4D0V7-2                 | CG058_HUMAN Isoform 2 of Uncharacterized protein C7orf58 OS=Homo sapiens GN=C7orf58                                     |          |                  |
| A4D126                   | ISPD_HUMAN 2-C-methyl-D-erythritol 4-phosphate cytidyltransferase-like protein OS=Homo sapiens GN=ISPD PE=3 SV=2        |          |                  |
| A4D1E9                   | GTPBA_HUMAN GTP-binding protein 10 OS=Homo sapiens GN=GTPBP10 PE=1 SV=1                                                 |          | 23.38            |
| A4D1E9-2                 | GTPBA_HUMAN Isoform 2 of GTP-binding protein 10 OS=Homo sapiens GN=GTPBP10                                              |          |                  |
| A4D1E9-3                 | GTPBA_HUMAN Isoform 3 of GTP-binding protein 10 OS=Homo sapiens GN=GTPBP10                                              |          |                  |
| A4D1E9;C9JN11;C9J8R7     | GTPBA_HUMAN GTP-binding protein 10 OS=Homo sapiens GN=GTPBP10 PE=1 SV=1;>tr C9JN11 C9JN11_HUMAN Uncharacterized pro     | 2.03E-05 |                  |
| A4D1F6                   | LRRD1_HUMAN Leucine-rich repeat and death domain-containing protein 1 OS=Homo sapiens GN=LRRD1 PE=2 SV=2                |          |                  |
| A4FU69                   | EFCB5_HUMAN EF-hand calcium-binding domain-containing protein 5 OS=Homo sapiens GN=EFCAB5 PE=1 SV=2                     |          |                  |
| A4FU69-2                 | EFCB5_HUMAN Isoform 2 of EF-hand calcium-binding domain-containing protein 5 OS=Homo sapiens GN=EFCAB5                  |          |                  |
| A4FU69-3                 | EFCB5_HUMAN Isoform 3 of EF-hand calcium-binding domain-containing protein 5 OS=Homo sapiens GN=EFCAB5                  |          |                  |
| A4FU69-4                 | EFCB5_HUMAN Isoform 4 of EF-hand calcium-binding domain-containing protein 5 OS=Homo sapiens GN=EFCAB5                  |          |                  |
| A4FU69;A4FU69-3          | EFCB5_HUMAN EF-hand calcium-binding domain-containing protein 5 OS=Homo sapiens GN=EFCAB5 PE=1 SV=2;>sp A4FU69-3 EFCI   | 4.22E-09 |                  |
| A4QPH2                   | PI4P2_HUMAN Putative phosphatidylinositol 4-kinase alpha-like protein P2 OS=Homo sapiens GN=PI4KAP2 PE=5 SV=2           |          |                  |
| A4QPH2-2                 | PI4P2_HUMAN Isoform 2 of Putative phosphatidylinositol 4-kinase alpha-like protein P2 OS=Homo sapiens GN=PI4KAP2        |          |                  |
| A4QPH2-3                 | PI4P2_HUMAN Isoform 3 of Putative phosphatidylinositol 4-kinase alpha-like protein P2 OS=Homo sapiens GN=PI4KAP2        |          |                  |
| A4UGR9                   | XIRP2_HUMAN Xin actin-binding repeat-containing protein 2 OS=Homo sapiens GN=XIRP2 PE=1 SV=2                            |          |                  |
| A4UGR9-2                 | XIRP2_HUMAN Isoform 2 of Xin actin-binding repeat-containing protein 2 OS=Homo sapiens GN=XIRP2                         |          |                  |
| A4UGR9-3                 | XIRP2_HUMAN Isoform 3 of Xin actin-binding repeat-containing protein 2 OS=Homo sapiens GN=XIRP2                         |          |                  |
| A5A3E0                   | POTEF_HUMAN POTE ankyrin domain family member F OS=Homo sapiens GN=POTEF PE=1 SV=2                                      |          | 520.57           |
| A5PLN7                   | F149A_HUMAN Protein FAM149A OS=Homo sapiens GN=FAM149A PE=2 SV=2                                                        |          | 35.09            |
| A5PLN7-2                 | F149A_HUMAN Isoform 2 of Protein FAM149A OS=Homo sapiens GN=FAM149A                                                     |          |                  |
| A5PLN7-3                 | F149A_HUMAN Isoform 3 of Protein FAM149A OS=Homo sapiens GN=FAM149A                                                     |          | 35.09            |

|                             |                                                                                                                                     |           |        |
|-----------------------------|-------------------------------------------------------------------------------------------------------------------------------------|-----------|--------|
| A5PLN7-4                    | F149A_HUMAN Isoform 4 of Protein FAM149A OS=Homo sapiens GN=FAM149A                                                                 |           | 35.09  |
| A5YKK6                      | CNOT1_HUMAN CCR4-NOT transcription complex subunit 1 OS=Homo sapiens GN=CNOT1 PE=1 SV=2                                             |           | 107.9  |
| A5YKK6-2                    | CNOT1_HUMAN Isoform 2 of CCR4-NOT transcription complex subunit 1 OS=Homo sapiens GN=CNOT1                                          |           | 107.9  |
| A5YKK6-3                    | CNOT1_HUMAN Isoform 3 of CCR4-NOT transcription complex subunit 1 OS=Homo sapiens GN=CNOT1                                          |           | 107.9  |
| A5YKK6-4                    | CNOT1_HUMAN Isoform 4 of CCR4-NOT transcription complex subunit 1 OS=Homo sapiens GN=CNOT1                                          |           | 43.57  |
| A5YKK6;A5YKK6-2;A5YKK6      | CNOT1_HUMAN CCR4-NOT transcription complex subunit 1 OS=Homo sapiens GN=CNOT1 PE=1 SV=2;>sp A5YKK6-2 CNOT1_HUMAN                    | 1.68E-40  |        |
| A5YM72-2                    | CRNS1_HUMAN Isoform 2 of Carnosine synthase 1 OS=Homo sapiens GN=CARNS1                                                             |           |        |
| A6H8Y1                      | BDP1_HUMAN Transcription factor TFIIIB component B'' homolog OS=Homo sapiens GN=BDP1 PE=1 SV=3                                      |           | 44.09  |
| A6H8Y1-2                    | BDP1_HUMAN Isoform 2 of Transcription factor TFIIIB component B'' homolog OS=Homo sapiens GN=BDP1                                   |           | 44.09  |
| A6H8Y1-3                    | BDP1_HUMAN Isoform 3 of Transcription factor TFIIIB component B'' homolog OS=Homo sapiens GN=BDP1                                   |           | 38.43  |
| A6H8Y1-4                    | BDP1_HUMAN Isoform 4 of Transcription factor TFIIIB component B'' homolog OS=Homo sapiens GN=BDP1                                   |           | 38.43  |
| A6H8Y1-5                    | BDP1_HUMAN Isoform 5 of Transcription factor TFIIIB component B'' homolog OS=Homo sapiens GN=BDP1                                   |           | 37.26  |
| A6H8Y1-6                    | BDP1_HUMAN Isoform 6 of Transcription factor TFIIIB component B'' homolog OS=Homo sapiens GN=BDP1                                   |           | 44.09  |
| A6H8Y1-7                    | BDP1_HUMAN Isoform 7 of Transcription factor TFIIIB component B'' homolog OS=Homo sapiens GN=BDP1                                   |           | 44.09  |
| A6H8Y1-8                    | BDP1_HUMAN Isoform 8 of Transcription factor TFIIIB component B'' homolog OS=Homo sapiens GN=BDP1                                   |           | 5.66   |
| A6NC57                      | ANR62_HUMAN Ankyrin repeat domain-containing protein 62 OS=Homo sapiens GN=ANKRD62 PE=2 SV=4                                        |           |        |
| A6NC57-2                    | ANR62_HUMAN Isoform 4 of Ankyrin repeat domain-containing protein 62 OS=Homo sapiens GN=ANKRD62                                     |           |        |
| A6NCE7                      | MP3B2_HUMAN Microtubule-associated proteins 1A/1B light chain 3 beta 2 OS=Homo sapiens GN=MAP1LC3B2 PE=2 SV=1                       |           | 128.32 |
| A6NCN2                      | KT81L_HUMAN Keratin-81-like protein OS=Homo sapiens PE=2 SV=3                                                                       |           | 1.6    |
| A6NCS4                      | NKX26_HUMAN Homeobox protein Nkx-2.6 OS=Homo sapiens GN=NKX2-6 PE=1 SV=1                                                            |           |        |
| A6NCS6                      | CB072_HUMAN Uncharacterized protein C2orf72 OS=Homo sapiens GN=C2orf72 PE=2 SV=2                                                    |           | 30.11  |
| A6NDG6                      | PGP_HUMAN Phosphoglycolate phosphatase OS=Homo sapiens GN=PGP PE=1 SV=1                                                             | 9.24E-28  |        |
| A6NDJ8                      | RB43L_HUMAN Putative Rab-43-like protein ENSP00000330714 OS=Homo sapiens PE=5 SV=3                                                  |           | 71.25  |
| A6NDK8                      | FA35B_HUMAN Protein FAM35B OS=Homo sapiens GN=FAM35B PE=3 SV=3                                                                      |           |        |
| A6NDU8                      | CE051_HUMAN UPF0600 protein C5orf51 OS=Homo sapiens GN=C5orf51 PE=1 SV=1                                                            | 1.62E-15  |        |
| A6NDY0                      | EPAB2_HUMAN Embryonic polyadenylate-binding protein 2 OS=Homo sapiens GN=PABPN1L PE=2 SV=1                                          |           |        |
| A6NDY0-2                    | EPAB2_HUMAN Isoform 2 of Embryonic polyadenylate-binding protein 2 OS=Homo sapiens GN=PABPN1L                                       |           |        |
| A6NDY0-4                    | EPAB2_HUMAN Isoform 4 of Embryonic polyadenylate-binding protein 2 OS=Homo sapiens GN=PABPN1L                                       |           |        |
| A6NDY2                      | F90AA_HUMAN Putative protein FAM90A10 OS=Homo sapiens GN=FAM90A10 PE=2 SV=1                                                         |           |        |
| A6NE01                      | F186A_HUMAN Protein FAM186A OS=Homo sapiens GN=FAM186A PE=2 SV=3                                                                    | 3.69E-06  |        |
| A6NE21                      | F90AI_HUMAN Putative protein FAM90A18/FAM90A19 OS=Homo sapiens GN=FAM90A18 PE=1 SV=1                                                |           |        |
| A6NED2                      | RCCD1_HUMAN RCC1 domain-containing protein 1 OS=Homo sapiens GN=RCCD1 PE=1 SV=1                                                     |           |        |
| A6NEK1                      | ARRD5_HUMAN Arrestin domain-containing protein 5 OS=Homo sapiens GN=ARRDC5 PE=2 SV=2                                                |           |        |
| A6NEW6                      | F90AG_HUMAN Putative protein FAM90A16/FAM90A17 OS=Homo sapiens GN=FAM90A16 PE=3 SV=1                                                |           |        |
| A6NGG8                      | CB071_HUMAN Uncharacterized protein C2orf71 OS=Homo sapiens GN=C2orf71 PE=1 SV=1                                                    |           | 26.22  |
| A6NGZ7                      | U93BL_HUMAN Putative protein unc-93 homolog B1-like protein OS=Homo sapiens PE=5 SV=3                                               |           |        |
| A6NH08                      | ZB12L_HUMAN Putative zinc finger and BTB domain-containing protein 12-like protein OS=Homo sapiens PE=5 SV=4                        |           |        |
| A6NH11                      | GLTD2_HUMAN Glycolipid transfer protein domain-containing protein 2 OS=Homo sapiens GN=GLTPD2 PE=1 SV=2                             |           |        |
| A6NHG4                      | DDTL_HUMAN D-dopachrome decarboxylase-like protein OS=Homo sapiens GN=DDTL PE=2 SV=1                                                |           | 66.99  |
| A6NHJ4                      | ZN860_HUMAN Zinc finger protein 860 OS=Homo sapiens GN=ZNF860 PE=2 SV=3                                                             |           |        |
| A6NHL2                      | TBAL3_HUMAN Tubulin alpha chain-like 3 OS=Homo sapiens GN=TUBAL3 PE=1 SV=2                                                          |           | 214.65 |
| A6NHL2-2                    | TBAL3_HUMAN Isoform 2 of Tubulin alpha chain-like 3 OS=Homo sapiens GN=TUBAL3                                                       |           | 214.65 |
| A6NHL2;A6NHL2-2             | TBAL3_HUMAN Tubulin alpha chain-like 3 OS=Homo sapiens GN=TUBAL3 PE=1 SV=2;>sp A6NHL2-2 TBAL3_HUMAN Isoform 2 of Tub                | 2.48E-65  |        |
| A6NHQ2                      | FBLL1_HUMAN rRNA/tRNA 2'-O-methyltransferase fibrillar-like protein 1 OS=Homo sapiens GN=FBLL1 PE=3 SV=1                            |           | 48.63  |
| A6NHR9                      | SMHD1_HUMAN Structural maintenance of chromosomes flexible hinge domain-containing protein 1 OS=Homo sapiens GN=SMCHD1 PE=1 SV=2    |           | 417.09 |
| A6NHR9-2                    | SMHD1_HUMAN Isoform 2 of Structural maintenance of chromosomes flexible hinge domain-containing protein 1 OS=Homo sapiens GN=SMCHD1 |           | 411    |
| A6NHR9-3                    | SMHD1_HUMAN Isoform 3 of Structural maintenance of chromosomes flexible hinge domain-containing protein 1 OS=Homo sapiens GN=SMCHD1 |           | 198.4  |
| A6NHR9;A6NHR9-2;A6NHR9-3    | SMHD1_HUMAN Structural maintenance of chromosomes flexible hinge domain-containing protein 1 OS=Homo sapiens GN=SMCHD1              | 7.01E-119 |        |
| A6NHZ5                      | LR14B_HUMAN Leucine-rich repeat-containing protein 14B OS=Homo sapiens GN=LRRC14B PE=3 SV=3                                         |           |        |
| A6NI47                      | POTEM_HUMAN Putative POTE ankyrin domain family member M OS=Homo sapiens GN=POTEM PE=3 SV=2                                         |           |        |
| A6NI72;P14598;A8MVU1;A6NI72 | NCF1B_HUMAN Putative neutrophil cytosol factor 1B OS=Homo sapiens GN=NCF1B PE=5 SV=2;>sp P14598 NCF1_HUMAN Neutrophil               | 4.82E-06  |        |
| A6NIE6                      | RN3L1_HUMAN RRN3-like protein 1 OS=Homo sapiens PE=2 SV=3                                                                           |           |        |
| A6NIJ5                      | F90AK_HUMAN Putative protein FAM90A20 OS=Homo sapiens GN=FAM90A20 PE=3 SV=1                                                         |           |        |
| A6NIK2                      | LR10B_HUMAN Leucine-rich repeat-containing protein 10B OS=Homo sapiens GN=LRRC10B PE=4 SV=2                                         |           | 28.31  |
| A6NIL8                      | YP041_HUMAN Putative CDC37-like protein ENSP00000350273 OS=Homo sapiens PE=5 SV=1                                                   |           |        |
| A6NIZ1                      | RP1BL_HUMAN Ras-related protein Rap-1b-like protein OS=Homo sapiens PE=2 SV=1                                                       |           | 552.9  |
| A6NJJ6                      | CS067_HUMAN UPF0575 protein C19orf67 OS=Homo sapiens GN=C19orf67 PE=2 SV=2                                                          |           |        |
| A6NJQ4                      | F90A8_HUMAN Putative protein FAM90A8 OS=Homo sapiens GN=FAM90A8 PE=3 SV=1                                                           |           |        |
| A6NJZ7                      | RIM3C_HUMAN RIMS-binding protein 3C OS=Homo sapiens GN=RIMBP3C PE=1 SV=2                                                            |           |        |
| A6NK07                      | IF2BL_HUMAN Eukaryotic translation initiation factor 2 subunit 2-like protein OS=Homo sapiens PE=1 SV=1                             |           | 624.51 |
| A6NKCO                      | F90A7_HUMAN Putative protein FAM90A7 OS=Homo sapiens GN=FAM90A7 PE=2 SV=1                                                           |           |        |

|                      |                                                                                                                         |            |
|----------------------|-------------------------------------------------------------------------------------------------------------------------|------------|
| A6NKF1               | SAC31_HUMAN SAC3 domain-containing protein 1 OS=Homo sapiens GN=SAC3D1 PE=1 SV=2                                        |            |
| A6NKF2               | ARI3C_HUMAN AT-rich interactive domain-containing protein 3C OS=Homo sapiens GN=ARID3C PE=2 SV=1                        |            |
| A6NKF9               | GPHRC_HUMAN Putative Golgi pH regulator C OS=Homo sapiens GN=GPR89C PE=5 SV=2                                           |            |
| A6NKH3               | RL37L_HUMAN Putative 60S ribosomal protein L37a-like OS=Homo sapiens GN=RPL37L PE=5 SV=2                                | 24.19      |
| A6NKL6               | T200C_HUMAN Transmembrane protein 200C OS=Homo sapiens GN=TMEM200C PE=2 SV=2                                            |            |
| A6NKT7               | RGPD3_HUMAN RanBP2-like and GRIP domain-containing protein 3 OS=Homo sapiens GN=RGPD3 PE=2 SV=2                         | 185.39     |
| A6NKZ8               | YI016_HUMAN Putative tubulin beta chain-like protein ENSP00000290377 OS=Homo sapiens PE=5 SV=2                          | 543.13     |
| A6NL28               | TPM3L_HUMAN Putative tropomyosin alpha-3 chain-like protein OS=Homo sapiens PE=5 SV=2                                   | 74.78      |
| A6NL28-2             | TPM3L_HUMAN Isoform 2 of Putative tropomyosin alpha-3 chain-like protein OS=Homo sapiens                                | 74.78      |
| A6NL28;A6NL28-2      | TPM3L_HUMAN Putative tropomyosin alpha-3 chain-like protein OS=Homo sapiens PE=5 SV=2;>sp A6NL28-2 TPM3L_HUMAN Isoform  | 2.84E-52   |
| A6NLF2               | EA3L2_HUMAN RNA polymerase II transcription factor SIII subunit A3-like-2 OS=Homo sapiens GN=TCEB3CL2 PE=3 SV=1         |            |
| A6NLP5               | TTC36_HUMAN Tetratricopeptide repeat protein 36 OS=Homo sapiens GN=TTC36 PE=2 SV=1                                      | 27.44      |
| A6NLX3               | SPDE4_HUMAN Speedy protein E4 OS=Homo sapiens GN=SPDYE4 PE=2 SV=2                                                       |            |
| A6NM62               | LRC53_HUMAN Leucine-rich repeat-containing protein 53 OS=Homo sapiens GN=LRRRC53 PE=4 SV=2                              |            |
| A6NMX2               | I4E1B_HUMAN Eukaryotic translation initiation factor 4E type 1B OS=Homo sapiens GN=EIF4E1B PE=2 SV=3                    | 72.69      |
| A6NMY6               | AXA2L_HUMAN Putative annexin A2-like protein OS=Homo sapiens GN=ANXA2P2 PE=5 SV=2                                       | 2056.54    |
| A6NMZ7;A6NMZ7-2      | CO6A6_HUMAN Collagen alpha-6(VI) chain OS=Homo sapiens GN=COL6A6 PE=1 SV=2;>sp A6NMZ7-2 CO6A6_HUMAN Isoform 2 of (      | 9.13E-09   |
| A6NNH2               | F90AL_HUMAN Putative protein FAM90A-like OS=Homo sapiens PE=3 SV=2                                                      |            |
| A6NNJ1               | F90A9_HUMAN Putative protein FAM90A9 OS=Homo sapiens GN=FAM90A9 PE=3 SV=1                                               |            |
| A6NNM3               | RIM3B_HUMAN RIMS-binding protein 3B OS=Homo sapiens GN=RIMBP3B PE=2 SV=2                                                |            |
| A6NNW6               | ENO4_HUMAN Enolase-like protein ENO4 OS=Homo sapiens GN=ENO4 PE=2 SV=2                                                  | 26.39      |
| A6NNW6-2             | ENO4_HUMAN Isoform 2 of Enolase-like protein ENO4 OS=Homo sapiens GN=ENO4                                               | 24.8       |
| A6NNZ2               | TBB8B_HUMAN Tubulin beta-8 chain B OS=Homo sapiens PE=1 SV=1                                                            | 701.95     |
| A6PVS8               | LRIQ3_HUMAN Leucine-rich repeat and IQ domain-containing protein 3 OS=Homo sapiens GN=LRRIQ3 PE=2 SV=1                  |            |
| A6PVS8-2             | LRIQ3_HUMAN Isoform 2 of Leucine-rich repeat and IQ domain-containing protein 3 OS=Homo sapiens GN=LRRIQ3               |            |
| A6PVS8-3             | LRIQ3_HUMAN Isoform 3 of Leucine-rich repeat and IQ domain-containing protein 3 OS=Homo sapiens GN=LRRIQ3               |            |
| A6QL64               | AN36A_HUMAN Ankyrin repeat domain-containing protein 36A OS=Homo sapiens GN=ANKRD36 PE=2 SV=3                           |            |
| A6QL64-3             | AN36A_HUMAN Isoform 2 of Ankyrin repeat domain-containing protein 36A OS=Homo sapiens GN=ANKRD36                        |            |
| A7E2Y1               | MYH7B_HUMAN Myosin-7B OS=Homo sapiens GN=MYH7B PE=2 SV=3                                                                | 76.06      |
| A7E2Y1-2             | MYH7B_HUMAN Isoform 2 of Myosin-7B OS=Homo sapiens GN=MYH7B                                                             |            |
| A7E2Y1-3             | MYH7B_HUMAN Isoform 3 of Myosin-7B OS=Homo sapiens GN=MYH7B                                                             |            |
| A7E2Y1;A7E2Y1-3      | MYH7B_HUMAN Myosin-7B OS=Homo sapiens GN=MYH7B PE=2 SV=3;>sp A7E2Y1-3 MYH7B_HUMAN Isoform 3 of Myosin-7B OS=Ho          | 4.66E-06   |
| A7MCY6               | TBKB1_HUMAN TANK-binding kinase 1-binding protein 1 OS=Homo sapiens GN=TBKBP1 PE=1 SV=1                                 |            |
| A7MCY6-2             | TBKB1_HUMAN Isoform 2 of TANK-binding kinase 1-binding protein 1 OS=Homo sapiens GN=TBKBP1                              |            |
| A8K0Z3;Q6VEQ5;C4AMC7 | WASH1_HUMAN WAS protein family homolog 1 OS=Homo sapiens GN=WASH1 PE=1 SV=2;>sp Q6VEQ5 WASH2_HUMAN WAS proteir          | 2.50E-09   |
| A8K2U0               | A2ML1_HUMAN Alpha-2-macroglobulin-like protein 1 OS=Homo sapiens GN=A2ML1 PE=1 SV=3                                     | 0.00016106 |
| A8MT19               | RHN2L_HUMAN Putative raphilin-2-like protein OS=Homo sapiens PE=5 SV=2                                                  |            |
| A8MT69               | CENPX_HUMAN Centromere protein X OS=Homo sapiens GN=STRA13 PE=1 SV=1                                                    |            |
| A8MT69-2             | CENPX_HUMAN Isoform 2 of Centromere protein X OS=Homo sapiens GN=STRA13                                                 |            |
| A8MT69-3             | CENPX_HUMAN Isoform 3 of Centromere protein X OS=Homo sapiens GN=STRA13                                                 |            |
| A8MTJ3               | GNAT3_HUMAN Guanine nucleotide-binding protein G(t) subunit alpha-3 OS=Homo sapiens GN=GNAT3 PE=2 SV=2                  | 182.81     |
| A8MUU9               | YV023_HUMAN Putative uncharacterized protein ENSP00000383309 OS=Homo sapiens PE=5 SV=3                                  | 43.26      |
| A8MW06;P62328        | TMSL3_HUMAN Thymosin beta-4-like protein 3 OS=Homo sapiens GN=TMSL3 PE=2 SV=1;>sp P62328 TYB4_HUMAN Thymosin beta-      | 3.37E-71   |
| A8MWA6               | F90AM_HUMAN Putative protein FAM90A22 OS=Homo sapiens GN=FAM90A22 PE=5 SV=1                                             |            |
| A8MWD9               | RUXGL_HUMAN Small nuclear ribonucleoprotein G-like protein OS=Homo sapiens PE=3 SV=2                                    | 290.34     |
| A8MWL7               | TM14D_HUMAN Transmembrane protein 14D OS=Homo sapiens GN=TMEM14D PE=3 SV=2                                              | 81.8       |
| A8MWS1               | KI3P1_HUMAN Putative killer cell immunoglobulin-like receptor like protein KIR3DP1 OS=Homo sapiens GN=KIR3DP1 PE=2 SV=2 |            |
| A8MWY0               | K132L_HUMAN UPF0577 protein KIAA1324-like OS=Homo sapiens GN=KIAA1324L PE=2 SV=2                                        |            |
| A8MWY0-2             | K132L_HUMAN Isoform 2 of UPF0577 protein KIAA1324-like OS=Homo sapiens GN=KIAA1324L                                     |            |
| A8MX19               | F90AC_HUMAN Putative protein FAM90A12 OS=Homo sapiens GN=FAM90A12 PE=3 SV=1                                             |            |
| A8MXJ8               | F90A5_HUMAN Putative protein FAM90A5 OS=Homo sapiens GN=FAM90A5 PE=3 SV=1                                               |            |
| A8MXV4               | NUD19_HUMAN Nucleoside diphosphate-linked moiety X motif 19, mitochondrial OS=Homo sapiens GN=NUDT19 PE=1 SV=1          | 3.43E-08   |
| A8MXZ1               | F90AN_HUMAN Putative protein FAM90A23 OS=Homo sapiens GN=FAM90A23 PE=5 SV=1                                             |            |
| A8MY62               | BLML_HUMAN Putative beta-lactamase-like 1 OS=Homo sapiens GN=LACTBL1 PE=2 SV=2                                          | 41.16      |
| A8MYJ9               | IMA2L_HUMAN Importin subunit alpha-2-like protein OS=Homo sapiens PE=2 SV=2                                             |            |
| A8MZ26               | EFCB9_HUMAN EF-hand calcium-binding domain-containing protein 9 OS=Homo sapiens GN=EFCAB9 PE=4 SV=2                     |            |
| A8MZ36               | EVPLL_HUMAN Envoplakin-like protein OS=Homo sapiens GN=EVPLL PE=2 SV=1                                                  |            |
| A9Z1Z3               | FR1L4_HUMAN Fer-1-like protein 4 OS=Homo sapiens GN=FER1L4 PE=2 SV=1                                                    |            |
| A9Z1Z3-3             | FR1L4_HUMAN Isoform 3 of Fer-1-like protein 4 OS=Homo sapiens GN=FER1L4                                                 |            |
| A9Z1Z3;A9Z1Z3-3      | FR1L4_HUMAN Fer-1-like protein 4 OS=Homo sapiens GN=FER1L4 PE=2 SV=1;>sp A9Z1Z3-3 FR1L4_HUMAN Isoform 3 of Fer-1-like   | 9.40E-07   |
| Accession            | Description                                                                                                             |            |

|                                                                                                                                                |                                                                                                                      |           |           |
|------------------------------------------------------------------------------------------------------------------------------------------------|----------------------------------------------------------------------------------------------------------------------|-----------|-----------|
| B0I1T2;B0I1T2-4                                                                                                                                | MYO1G_HUMAN Myosin-Ig OS=Homo sapiens GN=MYO1G PE=1 SV=2;>sp B0I1T2-4 MYO1G_HUMAN Isoform 4 of Myosin-Ig OS=Hor      | 1.76E-13  |           |
| B2RPK0                                                                                                                                         | HGB1A_HUMAN Putative high mobility group protein B1-like 1 OS=Homo sapiens GN=HMGB1P1 PE=5 SV=1                      |           | 383.75    |
| B2RTY4                                                                                                                                         | MYO9A_HUMAN Myosin-IXa OS=Homo sapiens GN=MYO9A PE=1 SV=2                                                            |           |           |
| B2RTY4-2                                                                                                                                       | MYO9A_HUMAN Isoform 2 of Myosin-IXa OS=Homo sapiens GN=MYO9A                                                         |           |           |
| B2RTY4-3                                                                                                                                       | MYO9A_HUMAN Isoform 3 of Myosin-IXa OS=Homo sapiens GN=MYO9A                                                         |           |           |
| B2RTY4-4                                                                                                                                       | MYO9A_HUMAN Isoform 4 of Myosin-IXa OS=Homo sapiens GN=MYO9A                                                         |           |           |
| B2RTY4-5                                                                                                                                       | MYO9A_HUMAN Isoform 5 of Myosin-IXa OS=Homo sapiens GN=MYO9A                                                         |           |           |
| B2RU33                                                                                                                                         | POTEC_HUMAN POTE ankyrin domain family member C OS=Homo sapiens GN=POTEC PE=2 SV=2                                   |           | 0.08      |
| B2RU33-2                                                                                                                                       | POTEC_HUMAN Isoform 2 of POTE ankyrin domain family member C OS=Homo sapiens GN=POTEC                                |           | 0.08      |
| B5MCN3                                                                                                                                         | S14L6_HUMAN Putative SEC14-like protein 6 OS=Homo sapiens GN=SEC14L6 PE=5 SV=1                                       |           |           |
| B7ZAQ6                                                                                                                                         | GPHRA_HUMAN Golgi pH regulator A OS=Homo sapiens GN=GPR89A PE=1 SV=2                                                 |           |           |
| B7ZAQ6-2                                                                                                                                       | GPHRA_HUMAN Isoform 2 of Golgi pH regulator A OS=Homo sapiens GN=GPR89A                                              |           |           |
| B7ZAQ6-3                                                                                                                                       | GPHRA_HUMAN Isoform 3 of Golgi pH regulator A OS=Homo sapiens GN=GPR89A                                              |           |           |
| B9A064                                                                                                                                         | IGLL5_HUMAN Immunoglobulin lambda-like polypeptide 5 OS=Homo sapiens GN=IGLL5 PE=2 SV=2                              |           | 164.87    |
| C9J798                                                                                                                                         | RAS4B_HUMAN Putative Ras GTPase-activating protein 4B OS=Homo sapiens GN=RASA4B PE=5 SV=2                            |           |           |
| C9JLW8                                                                                                                                         | F195B_HUMAN Protein FAM195B OS=Homo sapiens GN=FAM195B PE=1 SV=1                                                     |           | 56.78     |
| C9JRZ8                                                                                                                                         | AK1BF_HUMAN Aldo-keto reductase family 1 member B15 OS=Homo sapiens GN=AKR1B15 PE=2 SV=1                             |           | 46.44     |
| C9JRZ8-2                                                                                                                                       | AK1BF_HUMAN Isoform 2 of Aldo-keto reductase family 1 member B15 OS=Homo sapiens GN=AKR1B15                          |           | 46.44     |
| O00115                                                                                                                                         | DNS2A_HUMAN Deoxyribonuclease-2-alpha OS=Homo sapiens GN=DNASE2 PE=1 SV=2                                            |           | 31.64     |
| O00116                                                                                                                                         | ADAS_HUMAN Alkylidihydroxyacetonephosphate synthase, peroxisomal OS=Homo sapiens GN=AGPS PE=1 SV=1                   |           | 326.69    |
| O00139                                                                                                                                         | KIF2A_HUMAN Kinesin-like protein KIF2A OS=Homo sapiens GN=KIF2A PE=1 SV=3                                            |           | 40.02     |
| O00139-1                                                                                                                                       | KIF2A_HUMAN Isoform 1 of Kinesin-like protein KIF2A OS=Homo sapiens GN=KIF2A                                         |           | 40.02     |
| O00139-2                                                                                                                                       | KIF2A_HUMAN Isoform 2 of Kinesin-like protein KIF2A OS=Homo sapiens GN=KIF2A                                         |           | 40.02     |
| O00139-4                                                                                                                                       | KIF2A_HUMAN Isoform 4 of Kinesin-like protein KIF2A OS=Homo sapiens GN=KIF2A                                         |           | 40.02     |
| O00139-4;O00139;D3DW:4 KIF2A_HUMAN Isoform 4 of Kinesin-like protein KIF2A OS=Homo sapiens GN=KIF2A;>sp O00139 KIF2A_HUMAN Kinesin-like protei |                                                                                                                      | 1.75E-14  |           |
| O00148                                                                                                                                         | DX39A_HUMAN ATP-dependent RNA helicase DDX39A OS=Homo sapiens GN=DDX39A PE=1 SV=2                                    |           | 486.12    |
| O00151                                                                                                                                         | PDLI1_HUMAN PDZ and LIM domain protein 1 OS=Homo sapiens GN=PDLIM1 PE=1 SV=4                                         |           | 136.38    |
| O00154                                                                                                                                         | BACH_HUMAN Cytosolic acyl coenzyme A thioester hydrolase OS=Homo sapiens GN=ACOT7 PE=1 SV=3                          |           | 373.8     |
| O00154-2                                                                                                                                       | BACH_HUMAN Isoform 2 of Cytosolic acyl coenzyme A thioester hydrolase OS=Homo sapiens GN=ACOT7                       |           | 251.26    |
| O00154-3                                                                                                                                       | BACH_HUMAN Isoform 3 of Cytosolic acyl coenzyme A thioester hydrolase OS=Homo sapiens GN=ACOT7                       |           | 251.26    |
| O00154-4                                                                                                                                       | BACH_HUMAN Isoform 4 of Cytosolic acyl coenzyme A thioester hydrolase OS=Homo sapiens GN=ACOT7                       |           | 373.8     |
| O00154-4;O00154;B3KQ14 BACH_HUMAN Isoform 4 of Cytosolic acyl coenzyme A thioester hydrolase OS=Homo sapiens GN=ACOT7;>sp O00154 BACH_HUMA     |                                                                                                                      | 2.52E-122 |           |
| O00154-5                                                                                                                                       | BACH_HUMAN Isoform 5 of Cytosolic acyl coenzyme A thioester hydrolase OS=Homo sapiens GN=ACOT7                       |           | 381.03    |
| O00154-6                                                                                                                                       | BACH_HUMAN Isoform 6 of Cytosolic acyl coenzyme A thioester hydrolase OS=Homo sapiens GN=ACOT7                       |           | 373.8     |
| O00154;O00154-5;O0015                                                                                                                          | BACH_HUMAN Cytosolic acyl coenzyme A thioester hydrolase OS=Homo sapiens GN=ACOT7 PE=1 SV=3;>sp O00154-5 BACH_HUMA   |           | 8.48E-28  |
| O00159                                                                                                                                         | MYO1C_HUMAN Myosin-Ic OS=Homo sapiens GN=MYO1C PE=1 SV=4                                                             |           | 2298.4    |
| O00159-2                                                                                                                                       | MYO1C_HUMAN Isoform 2 of Myosin-Ic OS=Homo sapiens GN=MYO1C                                                          |           | 2164.36   |
| O00159-3                                                                                                                                       | MYO1C_HUMAN Isoform 3 of Myosin-Ic OS=Homo sapiens GN=MYO1C                                                          |           | 2286.72   |
| O00159-3;O00159;O0015                                                                                                                          | 3 MYO1C_HUMAN Isoform 3 of Myosin-Ic OS=Homo sapiens GN=MYO1C;>sp O00159 MYO1C_HUMAN Myosin-Ic OS=Homo sapiens G     |           | 2.29E-170 |
| O00159;O00159-3;B7Z3E                                                                                                                          | MYO1C_HUMAN Myosin-Ic OS=Homo sapiens GN=MYO1C PE=1 SV=4;>sp O00159-3 MYO1C_HUMAN Isoform 3 of Myosin-Ic OS=Hon      |           | 2.65E-200 |
| O00160                                                                                                                                         | MYO1F_HUMAN Myosin-If OS=Homo sapiens GN=MYO1F PE=1 SV=3                                                             |           | 3.73E-36  |
| O00161                                                                                                                                         | SNP23_HUMAN Synaptosomal-associated protein 23 OS=Homo sapiens GN=SNAP23 PE=1 SV=1                                   |           | 141.07    |
| O00161-2                                                                                                                                       | SNP23_HUMAN Isoform SNAP-23b of Synaptosomal-associated protein 23 OS=Homo sapiens GN=SNAP23                         |           | 127.33    |
| O00161;O00161-2                                                                                                                                | SNP23_HUMAN Synaptosomal-associated protein 23 OS=Homo sapiens GN=SNAP23 PE=1 SV=1;>sp O00161-2 SNP23_HUMAN Isofo    |           | 2.88E-33  |
| O00170                                                                                                                                         | AIP_HUMAN AH receptor-interacting protein OS=Homo sapiens GN=AIP PE=1 SV=2                                           |           | 2.77E-36  |
| O00178                                                                                                                                         | GTPB1_HUMAN GTP-binding protein 1 OS=Homo sapiens GN=GTPBP1 PE=1 SV=3                                                |           | 26.38     |
| O00182;O00182-2;Q3B8N                                                                                                                          | LEG9_HUMAN Galectin-9 OS=Homo sapiens GN=LGALS9 PE=1 SV=2;>sp O00182-2 LEG9_HUMAN Isoform Short of Galectin-9 OS=H   |           | 1.03E-15  |
| O00186                                                                                                                                         | STXB3_HUMAN Syntaxin-binding protein 3 OS=Homo sapiens GN=STXB3 PE=1 SV=2                                            |           | 248.89    |
| O00193                                                                                                                                         | SMAP_HUMAN Small acidic protein OS=Homo sapiens GN=SMAP PE=1 SV=1                                                    |           | 5.22E-12  |
| O00194                                                                                                                                         | RB27B_HUMAN Ras-related protein Rab-27B OS=Homo sapiens GN=RAB27B PE=1 SV=4                                          |           | 6.47      |
| O00203                                                                                                                                         | AP3B1_HUMAN AP-3 complex subunit beta-1 OS=Homo sapiens GN=AP3B1 PE=1 SV=3                                           |           | 2.21E-15  |
| O00204;O00204-2                                                                                                                                | ST2B1_HUMAN Sulfotransferase family cytosolic 2B member 1 OS=Homo sapiens GN=SULT2B1 PE=1 SV=2;>sp O00204-2 ST2B1_HL |           | 4.62E-25  |
| O00217                                                                                                                                         | NDUS8_HUMAN NADH dehydrogenase [ubiquinone] iron-sulfur protein 8, mitochondrial OS=Homo sapiens GN=NDUFS8 PE=1 SV=1 |           | 144.62    |
| O00220                                                                                                                                         | TR10A_HUMAN Tumor necrosis factor receptor superfamily member 10A OS=Homo sapiens GN=TNFRSF10A PE=1 SV=3             |           | 28.84     |
| O00231                                                                                                                                         | PSD11_HUMAN 26S proteasome non-ATPase regulatory subunit 11 OS=Homo sapiens GN=PSMD11 PE=1 SV=3                      |           | 332.68    |
| O00232                                                                                                                                         | PSD12_HUMAN 26S proteasome non-ATPase regulatory subunit 12 OS=Homo sapiens GN=PSMD12 PE=1 SV=3                      |           | 223.09    |
| O00233                                                                                                                                         | PSMD9_HUMAN 26S proteasome non-ATPase regulatory subunit 9 OS=Homo sapiens GN=PSMD9 PE=1 SV=3                        |           | 173       |
| O00233-2                                                                                                                                       | PSMD9_HUMAN Isoform p27-S of 26S proteasome non-ATPase regulatory subunit 9 OS=Homo sapiens GN=PSMD9                 |           | 173       |
| O00233;O00233-2                                                                                                                                | PSMD9_HUMAN 26S proteasome non-ATPase regulatory subunit 9 OS=Homo sapiens GN=PSMD9 PE=1 SV=3;>sp O00233-2 PSMD9_    |           | 4.40E-18  |
| O00258                                                                                                                                         | WRB_HUMAN Tryptophan-rich protein OS=Homo sapiens GN=WRB PE=2 SV=2                                                   |           | 2.87E-10  |
| O00264                                                                                                                                         | PGRC1_HUMAN Membrane-associated progesterone receptor component 1 OS=Homo sapiens GN=PGRMC1 PE=1 SV=3                |           | 387.33    |

|                       |                                                                                                                               |           |        |
|-----------------------|-------------------------------------------------------------------------------------------------------------------------------|-----------|--------|
| O00267;O00267-2       | SPT5H_HUMAN Transcription elongation factor SPT5 OS=Homo sapiens GN=SUPT5H PE=1 SV=1;>sp O00267-2 SPT5H_HUMAN Isofo           | 2.28E-18  |        |
| O00273;O00273-2       | DFFA_HUMAN DNA fragmentation factor subunit alpha OS=Homo sapiens GN=DFFA PE=1 SV=1;>sp O00273-2 DFFA_HUMAN Isoform           | 3.72E-11  |        |
| O00291                | HIP1_HUMAN Huntingtin-interacting protein 1 OS=Homo sapiens GN=HIP1 PE=1 SV=5                                                 |           |        |
| O00299                | CLIC1_HUMAN Chloride intracellular channel protein 1 OS=Homo sapiens GN=CLIC1 PE=1 SV=4                                       |           | 831.1  |
| O00303                | EIF3F_HUMAN Eukaryotic translation initiation factor 3 subunit F OS=Homo sapiens GN=EIF3F PE=1 SV=1                           |           | 705.47 |
| O00308                | WWP2_HUMAN NEDD4-like E3 ubiquitin-protein ligase WWP2 OS=Homo sapiens GN=WWP2 PE=1 SV=2                                      |           |        |
| O00330                | ODPX_HUMAN Pyruvate dehydrogenase protein X component, mitochondrial OS=Homo sapiens GN=PDHX PE=1 SV=3                        |           |        |
| O00338                | ST1C2_HUMAN Sulfotransferase 1C2 OS=Homo sapiens GN=SULT1C2 PE=1 SV=1                                                         |           | 25.05  |
| O00338-2              | ST1C2_HUMAN Isoform Long of Sulfotransferase 1C2 OS=Homo sapiens GN=SULT1C2                                                   |           | 25.05  |
| O00338-2;O00338       | 2 ST1C2_HUMAN Isoform Long of Sulfotransferase 1C2 OS=Homo sapiens GN=SULT1C2;>sp O00338 ST1C2_HUMAN Sulfotransferase         | 1.89E-05  |        |
| O00339;O00339-2;O0033 | MATN2_HUMAN Matrilin-2 OS=Homo sapiens GN=MATN2 PE=1 SV=4;>sp O00339-2 MATN2_HUMAN Isoform 2 of Matrilin-2 OS=Hom             | 1.68E-06  |        |
| O00391;A8K477;A8K4C2; | QSOX1_HUMAN Sulfhydryl oxidase 1 OS=Homo sapiens GN=QSOX1 PE=1 SV=3;>tr A8K477 A8K477_HUMAN cDNA FLJ78571, highly             | 6.96E-34  |        |
| O00399                | DCTN6_HUMAN Dynactin subunit 6 OS=Homo sapiens GN=DCTN6 PE=1 SV=1                                                             |           | 81.31  |
| O00400                | ACATN_HUMAN Acetyl-coenzyme A transporter 1 OS=Homo sapiens GN=SLC33A1 PE=1 SV=1                                              | 1.61E-08  |        |
| O00401                | WASL_HUMAN Neural Wiskott-Aldrich syndrome protein OS=Homo sapiens GN=WASL PE=1 SV=2                                          | 8.46E-10  |        |
| O00408                | PDE2A_HUMAN cGMP-dependent 3',5'-cyclic phosphodiesterase OS=Homo sapiens GN=PDE2A PE=1 SV=1                                  |           |        |
| O00410                | IPO5_HUMAN Importin-5 OS=Homo sapiens GN=IPO5 PE=1 SV=4                                                                       |           | 294.95 |
| O00410-2              | IPO5_HUMAN Isoform 2 of Importin-5 OS=Homo sapiens GN=IPO5                                                                    |           | 246.05 |
| O00410-3              | IPO5_HUMAN Isoform 3 of Importin-5 OS=Homo sapiens GN=IPO5                                                                    |           | 294.95 |
| O00410-3;O00410;O0041 | 3 IPO5_HUMAN Isoform 3 of Importin-5 OS=Homo sapiens GN=IPO5;>sp O00410 IPO5_HUMAN Importin-5 OS=Homo sapiens GN=I            | 0         |        |
| O00422                | SAP18_HUMAN Histone deacetylase complex subunit SAP18 OS=Homo sapiens GN=SAP18 PE=1 SV=1                                      |           | 168.81 |
| O00423                | EMAL1_HUMAN Echinoderm microtubule-associated protein-like 1 OS=Homo sapiens GN=EML1 PE=1 SV=3                                |           | 30.01  |
| O00423-3              | EMAL1_HUMAN Isoform 3 of Echinoderm microtubule-associated protein-like 1 OS=Homo sapiens GN=EML1                             |           | 30.01  |
| O00425                | IF2B3_HUMAN Insulin-like growth factor 2 mRNA-binding protein 3 OS=Homo sapiens GN=IGF2BP3 PE=1 SV=2                          |           | 275.35 |
| O00425-2              | IF2B3_HUMAN Isoform 2 of Insulin-like growth factor 2 mRNA-binding protein 3 OS=Homo sapiens GN=IGF2BP3                       |           | 154.35 |
| O00425;O00425-2       | IF2B3_HUMAN Insulin-like growth factor 2 mRNA-binding protein 3 OS=Homo sapiens GN=IGF2BP3 PE=1 SV=2;>sp O00425-2 IF2B3       | 2.86E-82  |        |
| O00429-3;O00429-6;O00 | 3 DNM1L_HUMAN Isoform 2 of Dynamin-1-like protein OS=Homo sapiens GN=DNM1L;>sp O00429-6 DNM1L_HUMAN Isoform 6 of Dy           | 4.59E-203 |        |
| O00429-6;O00429;O0042 | 6 DNM1L_HUMAN Isoform 6 of Dynamin-1-like protein OS=Homo sapiens GN=DNM1L;>sp O00429 DNM1L_HUMAN Dynamin-1-like p            | 2.13E-278 |        |
| O00442-2;A8K8K1;O0044 | 2 RTC1_HUMAN Isoform 2 of RNA 3-terminal phosphate cyclase OS=Homo sapiens GN=RTCD1;>tr A8K8K1 A8K8K1_HUMAN cDNA FL           | 7.56E-27  |        |
| O00443                | P3C2A_HUMAN Phosphatidylinositol-4-phosphate 3-kinase C2 domain-containing subunit alpha OS=Homo sapiens GN=PIK3C2A PE=1 SV=2 |           |        |
| O00445                | SYT5_HUMAN Synaptotagmin-5 OS=Homo sapiens GN=SYT5 PE=2 SV=2                                                                  |           | 2.98   |
| O00458                | IFRD1_HUMAN Interferon-related developmental regulator 1 OS=Homo sapiens GN=IFRD1 PE=1 SV=4                                   |           |        |
| O00459                | P85B_HUMAN Phosphatidylinositol 3-kinase regulatory subunit beta OS=Homo sapiens GN=PIK3R2 PE=1 SV=2                          |           | 32.98  |
| O00461                | GOLI4_HUMAN Golgi integral membrane protein 4 OS=Homo sapiens GN=GOLIM4 PE=1 SV=1                                             | 1.76E-07  |        |
| O00468                | AGRIN_HUMAN Agrin OS=Homo sapiens GN=AGRN PE=1 SV=4                                                                           |           |        |
| O00469                | PLOD2_HUMAN Procollagen-lysine,2-oxoglutarate 5-dioxygenase 2 OS=Homo sapiens GN=PLOD2 PE=1 SV=2                              |           | 82.15  |
| O00469-2              | PLOD2_HUMAN Isoform 2 of Procollagen-lysine,2-oxoglutarate 5-dioxygenase 2 OS=Homo sapiens GN=PLOD2                           |           | 82.15  |
| O00469-2;O00469       | 2 PLOD2_HUMAN Isoform 2 of Procollagen-lysine,2-oxoglutarate 5-dioxygenase 2 OS=Homo sapiens GN=PLOD2;>sp O00469 PLOD2_       | 2.88E-27  |        |
| O00471                | EXOC5_HUMAN Exocyst complex component 5 OS=Homo sapiens GN=EXOC5 PE=1 SV=1                                                    |           | 31.04  |
| O00472                | ELL2_HUMAN RNA polymerase II elongation factor ELL2 OS=Homo sapiens GN=ELL2 PE=1 SV=2                                         |           |        |
| O00476                | NPT4_HUMAN Sodium-dependent phosphate transport protein 4 OS=Homo sapiens GN=SLC17A3 PE=2 SV=2                                |           |        |
| O00483                | NDUA4_HUMAN NADH dehydrogenase [ubiquinone] 1 alpha subcomplex subunit 4 OS=Homo sapiens GN=NDUFA4 PE=1 SV=1                  |           | 150.07 |
| O00487                | PSDE_HUMAN 26S proteasome non-ATPase regulatory subunit 14 OS=Homo sapiens GN=PSMD14 PE=1 SV=1                                |           | 264.82 |
| O00488                | ZN593_HUMAN Zinc finger protein 593 OS=Homo sapiens GN=ZNF593 PE=1 SV=2                                                       |           |        |
| O00499;O00499-5;O0049 | BIN1_HUMAN Myc box-dependent-interacting protein 1 OS=Homo sapiens GN=BIN1 PE=1 SV=1;>sp O00499-5 BIN1_HUMAN Isoform          | 1.25E-08  |        |
| O00505                | IMA3_HUMAN Importin subunit alpha-3 OS=Homo sapiens GN=KPNA3 PE=1 SV=2                                                        |           |        |
| O00506                | STK25_HUMAN Serine/threonine-protein kinase 25 OS=Homo sapiens GN=STK25 PE=1 SV=1                                             |           | 57.95  |
| O00507                | USP9Y_HUMAN Probable ubiquitin carboxyl-terminal hydrolase FAF-Y OS=Homo sapiens GN=USP9Y PE=1 SV=2                           |           |        |
| O00507-2              | USP9Y_HUMAN Isoform Short of Probable ubiquitin carboxyl-terminal hydrolase FAF-Y OS=Homo sapiens GN=USP9Y                    |           |        |
| O00507;O00507-2       | USP9Y_HUMAN Probable ubiquitin carboxyl-terminal hydrolase FAF-Y OS=Homo sapiens GN=USP9Y PE=1 SV=2;>sp O00507-2 USP9Y        | 2.14E-107 |        |
| O00515                | LAD1_HUMAN Ladinin-1 OS=Homo sapiens GN=LAD1 PE=1 SV=2                                                                        |           |        |
| O00534;O00534-2;O0053 | VMA5A_HUMAN von Willebrand factor A domain-containing protein 5A OS=Homo sapiens GN=VWA5A PE=2 SV=2;>sp O00534-2 VMA          | 8.77E-18  |        |
| O00541                | PESC_HUMAN Pescadillo homolog OS=Homo sapiens GN=PES1 PE=1 SV=1                                                               |           | 89.56  |
| O00541-2              | PESC_HUMAN Isoform 2 of Pescadillo homolog OS=Homo sapiens GN=PES1                                                            |           | 89.56  |
| O00541;O00541-2       | PESC_HUMAN Pescadillo homolog OS=Homo sapiens GN=PES1 PE=1 SV=1;>sp O00541-2 PESC_HUMAN Isoform 2 of Pescadillo hom           | 7.10E-20  |        |
| O00560                | SDCB1_HUMAN Syntenin-1 OS=Homo sapiens GN=SDCBP PE=1 SV=1                                                                     |           |        |
| O00560-2              | SDCB1_HUMAN Isoform 2 of Syntenin-1 OS=Homo sapiens GN=SDCBP                                                                  |           |        |
| O00560-3              | SDCB1_HUMAN Isoform 3 of Syntenin-1 OS=Homo sapiens GN=SDCBP                                                                  |           |        |
| O00560;O00560-2;O0056 | SDCB1_HUMAN Syntenin-1 OS=Homo sapiens GN=SDCBP PE=1 SV=1;>sp O00560-2 SDCB1_HUMAN Isoform 2 of Syntenin-1 OS=H               | 2.59E-06  |        |
| O00566                | MPP10_HUMAN U3 small nucleolar ribonucleoprotein protein MPP10 OS=Homo sapiens GN=MPPHOSPH10 PE=1 SV=2                        |           |        |
| O00567                | NOP56_HUMAN Nucleolar protein 56 OS=Homo sapiens GN=NOP56 PE=1 SV=4                                                           |           | 438.61 |

|                       |                                                                                                                             |           |        |
|-----------------------|-----------------------------------------------------------------------------------------------------------------------------|-----------|--------|
| O00571                | DDX3X_HUMAN ATP-dependent RNA helicase DDX3X OS=Homo sapiens GN=DDX3X PE=1 SV=3                                             |           | 824.06 |
| O00584                | RNT2_HUMAN Ribonuclease T2 OS=Homo sapiens GN=RNASET2 PE=1 SV=2                                                             |           | 31.82  |
| O00592                | PODXL_HUMAN Podocalyxin OS=Homo sapiens GN=PODXL PE=1 SV=2                                                                  |           | 216.6  |
| O00592-2              | PODXL_HUMAN Isoform 2 of Podocalyxin OS=Homo sapiens GN=PODXL                                                               |           | 216.6  |
| O00592;O00592-2       | PODXL_HUMAN Podocalyxin OS=Homo sapiens GN=PODXL PE=1 SV=2;>sp O00592-2 PODXL_HUMAN Isoform 2 of Podocalyxin OS=H           | 2.02E-47  |        |
| O00622                | CYR61_HUMAN Protein CYR61 OS=Homo sapiens GN=CYR61 PE=1 SV=1                                                                |           | 358.6  |
| O00625                | PIR_HUMAN Pirin OS=Homo sapiens GN=PIR PE=1 SV=1                                                                            | 7.72E-11  |        |
| O00629                | IMA4_HUMAN Importin subunit alpha-4 OS=Homo sapiens GN=KPNA4 PE=1 SV=1                                                      |           |        |
| O00712                | NFIB_HUMAN Nuclear factor 1 B-type OS=Homo sapiens GN=NFIB PE=1 SV=2                                                        |           |        |
| O00712-2              | NFIB_HUMAN Isoform 3 of Nuclear factor 1 B-type OS=Homo sapiens GN=NFIB                                                     |           |        |
| O00743-3;O00743;O0074 | 3 PPP6_HUMAN Isoform 3 of Serine/threonine-protein phosphatase 6 catalytic subunit OS=Homo sapiens GN=PPP6C;>sp O00743 PPF  | 1.43E-24  |        |
| O00743;O00743-2;O0074 | PPP6_HUMAN Serine/threonine-protein phosphatase 6 catalytic subunit OS=Homo sapiens GN=PPP6C PE=1 SV=1;>sp O00743-2 PPP     | 5.88E-154 |        |
| O00746                | NDKM_HUMAN Nucleoside diphosphate kinase, mitochondrial OS=Homo sapiens GN=NME4 PE=1 SV=1                                   | 4.70E-09  |        |
| O00754                | MA2B1_HUMAN Lysosomal alpha-mannosidase OS=Homo sapiens GN=MAN2B1 PE=1 SV=3                                                 |           | 182.74 |
| O00757                | F16P2_HUMAN Fructose-1,6-bisphosphatase isozyme 2 OS=Homo sapiens GN=FBP2 PE=1 SV=2                                         | 4.64E-20  |        |
| O00762                | UBE2C_HUMAN Ubiquitin-conjugating enzyme E2 C OS=Homo sapiens GN=UBE2C PE=1 SV=1                                            |           | 45.89  |
| O00763;O00763-2       | ACACB_HUMAN Acetyl-CoA carboxylase 2 OS=Homo sapiens GN=ACACB PE=1 SV=3;>sp O00763-2 ACACB_HUMAN Isoform Short of           | 1.59E-18  |        |
| O00764                | PDXK_HUMAN Pyridoxal kinase OS=Homo sapiens GN=PDXK PE=1 SV=1                                                               |           | 17.69  |
| O00764-2              | PDXK_HUMAN Isoform 2 of Pyridoxal kinase OS=Homo sapiens GN=PDXK                                                            |           | 17.69  |
| O00764-3              | PDXK_HUMAN Isoform 3 of Pyridoxal kinase OS=Homo sapiens GN=PDXK                                                            |           | 17.69  |
| O00764;O00764-2;O0076 | PDXK_HUMAN Pyridoxal kinase OS=Homo sapiens GN=PDXK PE=1 SV=1;>sp O00764-2 PDXK_HUMAN Isoform 2 of Pyridoxal kinase         | 4.98E-215 |        |
| O00767                | ACOD_HUMAN Acyl-CoA desaturase OS=Homo sapiens GN=SCD PE=1 SV=2                                                             |           |        |
| O14493                | CLD4_HUMAN Claudin-4 OS=Homo sapiens GN=CLDN4 PE=1 SV=1                                                                     |           | 110.55 |
| O14497                | ARI1A_HUMAN AT-rich interactive domain-containing protein 1A OS=Homo sapiens GN=ARID1A PE=1 SV=3                            |           | 120.77 |
| O14497-2              | ARI1A_HUMAN Isoform 2 of AT-rich interactive domain-containing protein 1A OS=Homo sapiens GN=ARID1A                         |           | 68.64  |
| O14497-3              | ARI1A_HUMAN Isoform 3 of AT-rich interactive domain-containing protein 1A OS=Homo sapiens GN=ARID1A                         |           | 120.77 |
| O14497;O14497-2;O1449 | ARI1A_HUMAN AT-rich interactive domain-containing protein 1A OS=Homo sapiens GN=ARID1A PE=1 SV=3;>sp O14497-2 ARI1A_HI      | 4.35E-05  |        |
| O14498                | ISLR_HUMAN Immunoglobulin superfamily containing leucine-rich repeat protein OS=Homo sapiens GN=ISLR PE=1 SV=1              | 1.40E-16  |        |
| O14514                | BAI1_HUMAN Brain-specific angiogenesis inhibitor 1 OS=Homo sapiens GN=BAI1 PE=1 SV=1                                        | 6.60E-06  |        |
| O14521                | DHSD_HUMAN Succinate dehydrogenase [ubiquinone] cytochrome b small subunit, mitochondrial OS=Homo sapiens GN=SDHD PE=1 SV=1 |           |        |
| O14523                | C2C2L_HUMAN C2 domain-containing protein 2-like OS=Homo sapiens GN=C2CD2L PE=1 SV=3                                         |           | 39.52  |
| O14523-2              | C2C2L_HUMAN Isoform 2 of C2 domain-containing protein 2-like OS=Homo sapiens GN=C2CD2L                                      |           | 39.52  |
| O14524                | T194A_HUMAN Transmembrane protein 194A OS=Homo sapiens GN=TMEM194A PE=1 SV=2                                                |           |        |
| O14524-2              | T194A_HUMAN Isoform 2 of Transmembrane protein 194A OS=Homo sapiens GN=TMEM194A                                             |           |        |
| O14530                | TXND9_HUMAN Thioredoxin domain-containing protein 9 OS=Homo sapiens GN=TXNDC9 PE=1 SV=2                                     | 1.90E-10  |        |
| O14543                | SOCS3_HUMAN Suppressor of cytokine signaling 3 OS=Homo sapiens GN=SOCS3 PE=1 SV=1                                           |           | 19.31  |
| O14548                | COX7R_HUMAN Cytochrome c oxidase subunit 7A-related protein, mitochondrial OS=Homo sapiens GN=COX7A2L PE=1 SV=2             |           | 40.25  |
| O14556                | G3PT_HUMAN Glyceraldehyde-3-phosphate dehydrogenase, testis-specific OS=Homo sapiens GN=GAPDHS PE=1 SV=2                    |           | 40.53  |
| O14558                | HSPB6_HUMAN Heat shock protein beta-6 OS=Homo sapiens GN=HSPB6 PE=1 SV=2                                                    | 8.40E-45  |        |
| O14559                | RHG33_HUMAN Rho GTPase-activating protein 33 OS=Homo sapiens GN=ARHGAP33 PE=1 SV=2                                          |           |        |
| O14559-10             | RHG33_HUMAN Isoform 2 of Rho GTPase-activating protein 33 OS=Homo sapiens GN=ARHGAP33                                       |           |        |
| O14559-11             | RHG33_HUMAN Isoform 3 of Rho GTPase-activating protein 33 OS=Homo sapiens GN=ARHGAP33                                       |           |        |
| O14561                | ACPM_HUMAN Acyl carrier protein, mitochondrial OS=Homo sapiens GN=NDUFAB1 PE=1 SV=3                                         |           |        |
| O14562                | UBFD1_HUMAN Ubiquitin domain-containing protein UBFD1 OS=Homo sapiens GN=UBFD1 PE=1 SV=2                                    | 4.49E-05  |        |
| O14576;O14576-2;O1457 | DC1I1_HUMAN Cytoplasmic dynein 1 intermediate chain 1 OS=Homo sapiens GN=DYNC1I1 PE=1 SV=2;>sp O14576-2 DC1I1_HUMAI         | 2.33E-08  |        |
| O14578                | CTRO_HUMAN Citron Rho-interacting kinase OS=Homo sapiens GN=CIT PE=1 SV=2                                                   |           |        |
| O14578-3              | CTRO_HUMAN Isoform 3 of Citron Rho-interacting kinase OS=Homo sapiens GN=CIT                                                |           |        |
| O14578;O14578-3       | CTRO_HUMAN Citron Rho-interacting kinase OS=Homo sapiens GN=CIT PE=1 SV=2;>sp O14578-3 CTRO_HUMAN Isoform 3 of Citron       | 2.76E-17  |        |
| O14579                | COPE_HUMAN Coatomer subunit epsilon OS=Homo sapiens GN=COPE PE=1 SV=3                                                       |           | 325.08 |
| O14582                | TPPC2_HUMAN Trafficking protein particle complex subunit 2 OS=Homo sapiens GN=TRAPPC2 PE=1 SV=3                             |           | 48.25  |
| O14582-2              | TPPC2_HUMAN Isoform 2 of Trafficking protein particle complex subunit 2 OS=Homo sapiens GN=TRAPPC2                          |           | 48.25  |
| O14602                | IF1AY_HUMAN Eukaryotic translation initiation factor 1A, Y-chromosomal OS=Homo sapiens GN=EIF1AY PE=1 SV=4                  |           | 152.07 |
| O14617-5;O14617;O1461 | 5 AP3D1_HUMAN Isoform 5 of AP-3 complex subunit delta-1 OS=Homo sapiens GN=AP3D1;>sp O14617 AP3D1_HUMAN AP-3 comple         | 6.54E-40  |        |
| O14618                | CCS_HUMAN Copper chaperone for superoxide dismutase OS=Homo sapiens GN=CCS PE=1 SV=1                                        | 7.92E-09  |        |
| O14639                | ABLM1_HUMAN Actin-binding LIM protein 1 OS=Homo sapiens GN=ABLM1 PE=1 SV=3                                                  |           |        |
| O14639-2              | ABLM1_HUMAN Isoform 2 of Actin-binding LIM protein 1 OS=Homo sapiens GN=ABLM1                                               |           |        |
| O14639-3              | ABLM1_HUMAN Isoform 3 of Actin-binding LIM protein 1 OS=Homo sapiens GN=ABLM1                                               |           |        |
| O14639-4              | ABLM1_HUMAN Isoform 4 of Actin-binding LIM protein 1 OS=Homo sapiens GN=ABLM1                                               |           |        |
| O14639-5              | ABLM1_HUMAN Isoform 5 of Actin-binding LIM protein 1 OS=Homo sapiens GN=ABLM1                                               |           |        |
| O14641                | DVL2_HUMAN Segment polarity protein dishevelled homolog DVL-2 OS=Homo sapiens GN=DVL2 PE=1 SV=1                             | 4.40E-55  |        |
| O14646                | CHD1_HUMAN Chromodomain-helicase-DNA-binding protein 1 OS=Homo sapiens GN=CHD1 PE=1 SV=2                                    |           | 103.77 |



|                             |                                                                                                                                                                                                                           |           |        |
|-----------------------------|---------------------------------------------------------------------------------------------------------------------------------------------------------------------------------------------------------------------------|-----------|--------|
| O14646-2                    | CHD1_HUMAN Isoform 2 of Chromodomain-helicase-DNA-binding protein 1 OS=Homo sapiens GN=CHD1                                                                                                                               |           | 103.77 |
| O14647                      | CHD2_HUMAN Chromodomain-helicase-DNA-binding protein 2 OS=Homo sapiens GN=CHD2 PE=1 SV=2                                                                                                                                  |           | 89.56  |
| O14647-2                    | CHD2_HUMAN Isoform 2 of Chromodomain-helicase-DNA-binding protein 2 OS=Homo sapiens GN=CHD2                                                                                                                               |           | 89.56  |
| O14656                      | TOR1A_HUMAN Torsin-1A OS=Homo sapiens GN=TOR1A PE=1 SV=1                                                                                                                                                                  |           | 43.87  |
| O14657                      | TOR1B_HUMAN Torsin-1B OS=Homo sapiens GN=TOR1B PE=1 SV=2                                                                                                                                                                  |           | 80.12  |
| O14662                      | STX16_HUMAN Syntaxin-16 OS=Homo sapiens GN=STX16 PE=1 SV=3                                                                                                                                                                |           | 43.6   |
| O14662-2                    | STX16_HUMAN Isoform A of Syntaxin-16 OS=Homo sapiens GN=STX16                                                                                                                                                             |           | 43.6   |
| O14662-3                    | STX16_HUMAN Isoform C of Syntaxin-16 OS=Homo sapiens GN=STX16                                                                                                                                                             |           | 43.6   |
| O14662-4                    | STX16_HUMAN Isoform D of Syntaxin-16 OS=Homo sapiens GN=STX16                                                                                                                                                             |           | 43.6   |
| O14672                      | ADA10_HUMAN Disintegrin and metalloproteinase domain-containing protein 10 OS=Homo sapiens GN=ADA10 PE=1 SV=1                                                                                                             |           | 92.7   |
| O14678                      | ABCD4_HUMAN ATP-binding cassette sub-family D member 4 OS=Homo sapiens GN=ABCD4 PE=2 SV=1                                                                                                                                 |           |        |
| O14683                      | P5111_HUMAN Tumor protein p53-inducible protein 11 OS=Homo sapiens GN=TP53I11 PE=2 SV=2                                                                                                                                   | 3.68E-25  |        |
| O14684                      | PTGES_HUMAN Prostaglandin E synthase OS=Homo sapiens GN=PTGES PE=1 SV=2                                                                                                                                                   | 7.36E-37  |        |
| O14686                      | MLL2_HUMAN Histone-lysine N-methyltransferase MLL2 OS=Homo sapiens GN=MLL2 PE=1 SV=2                                                                                                                                      |           | 40.47  |
| O14686-3                    | MLL2_HUMAN Isoform 3 of Histone-lysine N-methyltransferase MLL2 OS=Homo sapiens GN=MLL2                                                                                                                                   |           | 40.47  |
| O14715                      | RGPD8_HUMAN RANBP2-like and GRIP domain-containing protein 8 OS=Homo sapiens GN=RGPD8 PE=1 SV=2                                                                                                                           |           | 149.46 |
| O14734                      | ACOT8_HUMAN Acyl-coenzyme A thioesterase 8 OS=Homo sapiens GN=ACOT8 PE=1 SV=1                                                                                                                                             |           | 52.13  |
| O14735                      | CDIPT_HUMAN CDP-diacylglycerol--inositol 3-phosphatidyltransferase OS=Homo sapiens GN=CDIPT PE=1 SV=1                                                                                                                     |           |        |
| O14737                      | PDCD5_HUMAN Programmed cell death protein 5 OS=Homo sapiens GN=PDCD5 PE=1 SV=3                                                                                                                                            |           | 348.52 |
| O14744                      | ANM5_HUMAN Protein arginine N-methyltransferase 5 OS=Homo sapiens GN=PRMT5 PE=1 SV=4                                                                                                                                      |           | 70.74  |
| O14745                      | NHRF1_HUMAN Na(+)/H(+) exchange regulatory cofactor NHE-RF1 OS=Homo sapiens GN=SLC9A3R1 PE=1 SV=4                                                                                                                         |           | 153.77 |
| O14757                      | CHK1_HUMAN Serine/threonine-protein kinase Chk1 OS=Homo sapiens GN=CHK1 PE=1 SV=2                                                                                                                                         |           |        |
| O14763                      | TR10B_HUMAN Tumor necrosis factor receptor superfamily member 10B OS=Homo sapiens GN=TNFRSF10B PE=1 SV=2                                                                                                                  |           | 173.05 |
| O14763-2                    | TR10B_HUMAN Isoform Short of Tumor necrosis factor receptor superfamily member 10B OS=Homo sapiens GN=TNFRSF10B                                                                                                           |           | 173.05 |
| O14772                      | FPGT_HUMAN Fucose-1-phosphate guanylyltransferase OS=Homo sapiens GN=FPGT PE=1 SV=2                                                                                                                                       |           |        |
| O14773                      | TPP1_HUMAN Tripeptidyl-peptidase 1 OS=Homo sapiens GN=TPP1 PE=1 SV=2                                                                                                                                                      |           | 262.67 |
| O14773-2                    | TPP1_HUMAN Isoform 2 of Tripeptidyl-peptidase 1 OS=Homo sapiens GN=TPP1                                                                                                                                                   |           | 213.65 |
| O14773;O14773-2             | TPP1_HUMAN Tripeptidyl-peptidase 1 OS=Homo sapiens GN=TPP1 PE=1 SV=2;>sp O14773-2 TPP1_HUMAN Isoform 2 of Tripeptidyl-peptidase 1 OS=Homo sapiens GN=TPP1                                                                 | 6.60E-39  |        |
| O14776                      | TCRG1_HUMAN Transcription elongation regulator 1 OS=Homo sapiens GN=TCERG1 PE=1 SV=2                                                                                                                                      |           | 275.83 |
| O14776-2                    | TCRG1_HUMAN Isoform 2 of Transcription elongation regulator 1 OS=Homo sapiens GN=TCERG1                                                                                                                                   |           | 275.83 |
| O14776;O14776-2             | TCRG1_HUMAN Transcription elongation regulator 1 OS=Homo sapiens GN=TCERG1 PE=1 SV=2;>sp O14776-2 TCRG1_HUMAN Isoform 2 of Transcription elongation regulator 1 OS=Homo sapiens GN=TCERG1                                 | 9.96E-42  |        |
| O14777                      | NDC80_HUMAN Kinetochore protein NDC80 homolog OS=Homo sapiens GN=NDC80 PE=1 SV=1                                                                                                                                          | 2.10E-52  |        |
| O14786                      | NRP1_HUMAN Neuropilin-1 OS=Homo sapiens GN=NRP1 PE=1 SV=3                                                                                                                                                                 |           | 200.46 |
| O14786-2                    | NRP1_HUMAN Isoform 2 of Neuropilin-1 OS=Homo sapiens GN=NRP1                                                                                                                                                              |           | 200.46 |
| O14786;O14786-2             | NRP1_HUMAN Neuropilin-1 OS=Homo sapiens GN=NRP1 PE=1 SV=3;>sp O14786-2 NRP1_HUMAN Isoform 2 of Neuropilin-1 OS=Homo sapiens GN=NRP1                                                                                       | 7.00E-05  |        |
| O14787                      | TNPO2_HUMAN Transportin-2 OS=Homo sapiens GN=TNPO2 PE=1 SV=3                                                                                                                                                              |           |        |
| O14787-2                    | TNPO2_HUMAN Isoform 2 of Transportin-2 OS=Homo sapiens GN=TNPO2                                                                                                                                                           |           |        |
| O14787;O14787-2             | TNPO2_HUMAN Transportin-2 OS=Homo sapiens GN=TNPO2 PE=1 SV=3;>sp O14787-2 TNPO2_HUMAN Isoform 2 of Transportin-2 OS=Homo sapiens GN=TNPO2                                                                                 | 8.19E-45  |        |
| O14791-2;O14791             | 2 APOL1_HUMAN Isoform 2 of Apolipoprotein L1 OS=Homo sapiens GN=APOL1;>sp O14791 APOL1_HUMAN Apolipoprotein L1 OS=Homo sapiens GN=APOL1                                                                                   | 1.32E-44  |        |
| O14795                      | UN13B_HUMAN Protein unc-13 homolog B OS=Homo sapiens GN=UNC13B PE=1 SV=2                                                                                                                                                  |           | 23.13  |
| O14802                      | RPC1_HUMAN DNA-directed RNA polymerase III subunit RPC1 OS=Homo sapiens GN=POLR3A PE=1 SV=2                                                                                                                               | 1.41E-13  |        |
| O14813                      | PHX2A_HUMAN Paired mesoderm homeobox protein 2A OS=Homo sapiens GN=PHOX2A PE=1 SV=2                                                                                                                                       |           |        |
| O14818                      | PSA7_HUMAN Proteasome subunit alpha type-7 OS=Homo sapiens GN=PSMA7 PE=1 SV=1                                                                                                                                             |           | 647.73 |
| O14818-2                    | PSA7_HUMAN Isoform 2 of Proteasome subunit alpha type-7 OS=Homo sapiens GN=PSMA7                                                                                                                                          |           | 443.57 |
| O14818;O14818-2             | PSA7_HUMAN Proteasome subunit alpha type-7 OS=Homo sapiens GN=PSMA7 PE=1 SV=1;>sp O14818-2 PSA7_HUMAN Isoform 2 of Proteasome subunit alpha type-7 OS=Homo sapiens GN=PSMA7                                               | 2.07E-290 |        |
| O14828                      | SCAM3_HUMAN Secretory carrier-associated membrane protein 3 OS=Homo sapiens GN=SCAMP3 PE=1 SV=3                                                                                                                           |           | 447.04 |
| O14828-2                    | SCAM3_HUMAN Isoform 2 of Secretory carrier-associated membrane protein 3 OS=Homo sapiens GN=SCAMP3                                                                                                                        |           | 422.75 |
| O14828;O14828-2             | SCAM3_HUMAN Secretory carrier-associated membrane protein 3 OS=Homo sapiens GN=SCAMP3 PE=1 SV=3;>sp O14828-2 SCAM3_HUMAN Isoform 2 of Secretory carrier-associated membrane protein 3 OS=Homo sapiens GN=SCAMP3           | 8.72E-190 |        |
| O14841                      | OPLA_HUMAN 5-oxoprolinase OS=Homo sapiens GN=OPLAH PE=1 SV=3                                                                                                                                                              | 1.53E-97  |        |
| O14879                      | IFIT3_HUMAN Interferon-induced protein with tetratricopeptide repeats 3 OS=Homo sapiens GN=IFIT3 PE=1 SV=1                                                                                                                | 1.20E-125 |        |
| O14880                      | MGST3_HUMAN Microsomal glutathione S-transferase 3 OS=Homo sapiens GN=MGST3 PE=1 SV=1                                                                                                                                     |           | 201.24 |
| O14893                      | GEM12_HUMAN Survival of motor neuron protein-interacting protein 1 OS=Homo sapiens GN=SIP1 PE=1 SV=1                                                                                                                      |           | 38.2   |
| O14893-2                    | GEM12_HUMAN Isoform 2 of Survival of motor neuron protein-interacting protein 1 OS=Homo sapiens GN=SIP1                                                                                                                   |           | 38.2   |
| O14893-3                    | GEM12_HUMAN Isoform 3 of Survival of motor neuron protein-interacting protein 1 OS=Homo sapiens GN=SIP1                                                                                                                   |           | 38.2   |
| O14893;O14893-2;O14893-3    | GEM12_HUMAN Survival of motor neuron protein-interacting protein 1 OS=Homo sapiens GN=SIP1 PE=1 SV=1;>sp O14893-2 GEM12_HUMAN Isoform 2 of Survival of motor neuron protein-interacting protein 1 OS=Homo sapiens GN=SIP1 | 4.04E-08  |        |
| O14896                      | IRF6_HUMAN Interferon regulatory factor 6 OS=Homo sapiens GN=IRF6 PE=1 SV=1                                                                                                                                               |           |        |
| O14907                      | TX1B3_HUMAN Tax1-binding protein 3 OS=Homo sapiens GN=TAX1BP3 PE=1 SV=2                                                                                                                                                   | 2.87E-30  |        |
| O14908                      | GIPC1_HUMAN PDZ domain-containing protein GIPC1 OS=Homo sapiens GN=GIPC1 PE=1 SV=2                                                                                                                                        |           | 216.54 |
| O14910                      | LIN7A_HUMAN Protein lin-7 homolog A OS=Homo sapiens GN=LIN7A PE=1 SV=2                                                                                                                                                    |           | 254.98 |
| O14920;B4DZ30;B4E0U4;O14924 | IKKB_HUMAN Inhibitor of nuclear factor kappa-B kinase subunit beta OS=Homo sapiens GN=IKKB PE=1 SV=1;>tr B4DZ30 B4DZ30_HUMAN Isoform 1 of Inhibitor of nuclear factor kappa-B kinase subunit beta OS=Homo sapiens GN=IKKB | 1.20E-06  |        |
| O14924                      | RGS12_HUMAN Regulator of G-protein signaling 12 OS=Homo sapiens GN=RGS12 PE=1 SV=1                                                                                                                                        |           | 31.75  |

|                       |                                                                                                                        |           |         |
|-----------------------|------------------------------------------------------------------------------------------------------------------------|-----------|---------|
| O14924-2              | RGS12_HUMAN Isoform 2 of Regulator of G-protein signaling 12 OS=Homo sapiens GN=RGS12                                  |           | 5.86    |
| O14924-3              | RGS12_HUMAN Isoform 3 of Regulator of G-protein signaling 12 OS=Homo sapiens GN=RGS12                                  |           | 5.86    |
| O14924-4              | RGS12_HUMAN Isoform 4 of Regulator of G-protein signaling 12 OS=Homo sapiens GN=RGS12                                  |           | 31.75   |
| O14929                | HAT1_HUMAN Histone acetyltransferase type B catalytic subunit OS=Homo sapiens GN=HAT1 PE=1 SV=1                        |           | 119.34  |
| O14929-2              | HAT1_HUMAN Isoform B of Histone acetyltransferase type B catalytic subunit OS=Homo sapiens GN=HAT1                     |           | 117.31  |
| O14929;O14929-2       | HAT1_HUMAN Histone acetyltransferase type B catalytic subunit OS=Homo sapiens GN=HAT1 PE=1 SV=1;>sp O14929-2 HAT1_HUMA | 8.56E-281 |         |
| O14933;O14933-2       | UB2L6_HUMAN Ubiquitin/ISG15-conjugating enzyme E2 L6 OS=Homo sapiens GN=UBE2L6 PE=1 SV=4;>sp O14933-2 UB2L6_HUMAN      | 4.82E-27  |         |
| O14936                | CSKP_HUMAN Peripheral plasma membrane protein CASK OS=Homo sapiens GN=CASK PE=1 SV=3                                   |           | 162.88  |
| O14936-2              | CSKP_HUMAN Isoform 2 of Peripheral plasma membrane protein CASK OS=Homo sapiens GN=CASK                                |           | 162.88  |
| O14936-3              | CSKP_HUMAN Isoform 3 of Peripheral plasma membrane protein CASK OS=Homo sapiens GN=CASK                                |           | 162.88  |
| O14936-4              | CSKP_HUMAN Isoform 4 of Peripheral plasma membrane protein CASK OS=Homo sapiens GN=CASK                                |           | 162.88  |
| O14936-5              | CSKP_HUMAN Isoform 5 of Peripheral plasma membrane protein CASK OS=Homo sapiens GN=CASK                                |           | 68.45   |
| O14936-6              | CSKP_HUMAN Isoform 6 of Peripheral plasma membrane protein CASK OS=Homo sapiens GN=CASK                                |           | 162.88  |
| O14936;O14936-2;O1493 | CSKP_HUMAN Peripheral plasma membrane protein CASK OS=Homo sapiens GN=CASK PE=1 SV=3;>sp O14936-2 CSKP_HUMAN Iso       | 4.27E-07  |         |
| O14949                | QCR8_HUMAN Cytochrome b-c1 complex subunit 8 OS=Homo sapiens GN=UQCRQ PE=1 SV=4                                        |           | 66.43   |
| O14950                | ML12B_HUMAN Myosin regulatory light chain 12B OS=Homo sapiens GN=MYL12B PE=1 SV=2                                      |           | 1326.17 |
| O14964;O14964-2       | HGS_HUMAN Hepatocyte growth factor-regulated tyrosine kinase substrate OS=Homo sapiens GN=HGS PE=1 SV=1;>sp O14964-2 H | 2.24E-135 |         |
| O14965                | STK6_HUMAN Serine/threonine-protein kinase 6 OS=Homo sapiens GN=AURKA PE=1 SV=2                                        |           |         |
| O14966                | RAB7L_HUMAN Ras-related protein Rab-7L1 OS=Homo sapiens GN=RAB7L1 PE=1 SV=1                                            | 7.71E-07  |         |
| O14967                | CLGN_HUMAN Calmegin OS=Homo sapiens GN=CLGN PE=1 SV=1                                                                  |           | 24.03   |
| O14972                | DSCR3_HUMAN Down syndrome critical region protein 3 OS=Homo sapiens GN=DSCR3 PE=1 SV=1                                 |           | 27.74   |
| O14974                | MYPT1_HUMAN Protein phosphatase 1 regulatory subunit 12A OS=Homo sapiens GN=PPP1R12A PE=1 SV=1                         |           | 269.07  |
| O14974-2              | MYPT1_HUMAN Isoform 2 of Protein phosphatase 1 regulatory subunit 12A OS=Homo sapiens GN=PPP1R12A                      |           | 197.71  |
| O14974-3              | MYPT1_HUMAN Isoform 3 of Protein phosphatase 1 regulatory subunit 12A OS=Homo sapiens GN=PPP1R12A                      |           | 237.85  |
| O14974-4              | MYPT1_HUMAN Isoform 4 of Protein phosphatase 1 regulatory subunit 12A OS=Homo sapiens GN=PPP1R12A                      |           | 237.85  |
| O14974;O14974-2;O1497 | MYPT1_HUMAN Protein phosphatase 1 regulatory subunit 12A OS=Homo sapiens GN=PPP1R12A PE=1 SV=1;>sp O14974-2 MYPT1_H    | 7.28E-32  |         |
| O14975                | S27A2_HUMAN Very long-chain acyl-CoA synthetase OS=Homo sapiens GN=SLC27A2 PE=1 SV=2                                   |           |         |
| O14976                | GAK_HUMAN Cyclin-G-associated kinase OS=Homo sapiens GN=GAK PE=1 SV=2                                                  |           | 27.35   |
| O14978                | ZN263_HUMAN Zinc finger protein 263 OS=Homo sapiens GN=ZNF263 PE=2 SV=2                                                |           |         |
| O14979                | HNRDL_HUMAN Heterogeneous nuclear ribonucleoprotein D-like OS=Homo sapiens GN=HNRPDL PE=1 SV=3                         |           | 266.39  |
| O14979-2              | HNRDL_HUMAN Isoform 2 of Heterogeneous nuclear ribonucleoprotein D-like OS=Homo sapiens GN=HNRPDL                      |           | 246.71  |
| O14979-3              | HNRDL_HUMAN Isoform 3 of Heterogeneous nuclear ribonucleoprotein D-like OS=Homo sapiens GN=HNRPDL                      |           | 246.71  |
| O14979;O14979-2;O1497 | HNRDL_HUMAN Heterogeneous nuclear ribonucleoprotein D-like OS=Homo sapiens GN=HNRPDL PE=1 SV=3;>sp O14979-2 HNRDL_H    | 4.16E-169 |         |
| O14980                | XPO1_HUMAN Exportin-1 OS=Homo sapiens GN=XPO1 PE=1 SV=1                                                                |           | 489.57  |
| O14981                | BTAF1_HUMAN TATA-binding protein-associated factor 172 OS=Homo sapiens GN=BTAF1 PE=1 SV=2                              | 2.46E-17  |         |
| O14983                | AT2A1_HUMAN Sarcoplasmic/endoplasmic reticulum calcium ATPase 1 OS=Homo sapiens GN=ATP2A1 PE=1 SV=1                    |           | 541.87  |
| O14983-2              | AT2A1_HUMAN Isoform 2 of Sarcoplasmic/endoplasmic reticulum calcium ATPase 1 OS=Homo sapiens GN=ATP2A1                 |           | 541.87  |
| O14986                | PI51B_HUMAN Phosphatidylinositol-4-phosphate 5-kinase type-1 beta OS=Homo sapiens GN=PIP5K1B PE=1 SV=2                 |           |         |
| O14986-2              | PI51B_HUMAN Isoform 2 of Phosphatidylinositol-4-phosphate 5-kinase type-1 beta OS=Homo sapiens GN=PIP5K1B              |           |         |
| O14994                | SYN3_HUMAN Synapsin-3 OS=Homo sapiens GN=SYN3 PE=1 SV=2                                                                |           |         |
| O15020                | SPTN2_HUMAN Spectrin beta chain, brain 2 OS=Homo sapiens GN=SPTBN2 PE=1 SV=3                                           |           | 289.66  |
| O15020-2              | SPTN2_HUMAN Isoform 2 of Spectrin beta chain, brain 2 OS=Homo sapiens GN=SPTBN2                                        |           | 289.66  |
| O15020;O15020-2       | SPTN2_HUMAN Spectrin beta chain, brain 2 OS=Homo sapiens GN=SPTBN2 PE=1 SV=3;>sp O15020-2 SPTN2_HUMAN Isoform 2 of S   | 2.88E-89  |         |
| O15021;B5MCH9;O15021  | MAST4_HUMAN Microtubule-associated serine/threonine-protein kinase 4 OS=Homo sapiens GN=MAST4 PE=1 SV=3;>tr B5MCH9 B5M | 1.98E-07  |         |
| O15027                | SC16A_HUMAN Protein transport protein Sec16A OS=Homo sapiens GN=SEC16A PE=1 SV=3                                       |           | 30.87   |
| O15027-2              | SC16A_HUMAN Isoform 2 of Protein transport protein Sec16A OS=Homo sapiens GN=SEC16A                                    |           | 30.87   |
| O15027-3              | SC16A_HUMAN Isoform 3 of Protein transport protein Sec16A OS=Homo sapiens GN=SEC16A                                    |           | 30.87   |
| O15027-4              | SC16A_HUMAN Isoform 4 of Protein transport protein Sec16A OS=Homo sapiens GN=SEC16A                                    |           | 30.87   |
| O15027-5              | SC16A_HUMAN Isoform 5 of Protein transport protein Sec16A OS=Homo sapiens GN=SEC16A                                    |           | 30.87   |
| O15027-5;O15027;O1502 | 5 SC16A_HUMAN Isoform 5 of Protein transport protein Sec16A OS=Homo sapiens GN=SEC16A;>sp O15027 SC16A_HUMAN Protein   | 2.70E-49  |         |
| O15031                | PLXB2_HUMAN Plexin-B2 OS=Homo sapiens GN=PLXNB2 PE=1 SV=3                                                              |           | 528.49  |
| O15037                | KHNYN_HUMAN Protein KHNYN OS=Homo sapiens GN=KHNYN PE=1 SV=3                                                           |           |         |
| O15042                | SR140_HUMAN U2 snRNP-associated SURP motif-containing protein OS=Homo sapiens GN=U2SURP PE=1 SV=2                      |           | 192.53  |
| O15042-2              | SR140_HUMAN Isoform 2 of U2 snRNP-associated SURP motif-containing protein OS=Homo sapiens GN=U2SURP                   |           | 192.53  |
| O15042-3              | SR140_HUMAN Isoform 3 of U2 snRNP-associated SURP motif-containing protein OS=Homo sapiens GN=U2SURP                   |           | 146.84  |
| O15042;O15042-2;O1504 | SR140_HUMAN U2 snRNP-associated SURP motif-containing protein OS=Homo sapiens GN=U2SURP PE=1 SV=2;>sp O15042-2 SR14    | 3.58E-72  |         |
| O15042;O15042-2;O1504 | SR140_HUMAN U2-associated protein SR140 OS=Homo sapiens GN=SR140 PE=1 SV=2;>sp O15042-2 SR140_HUMAN Isoform 2 of U     | 2.57E-50  |         |
| O15056                | SYNJ2_HUMAN Synaptojanin-2 OS=Homo sapiens GN=SYNJ2 PE=1 SV=3                                                          |           | 33.24   |
| O15056-2              | SYNJ2_HUMAN Isoform 2B1 of Synaptojanin-2 OS=Homo sapiens GN=SYNJ2                                                     |           | 33.24   |
| O15056-3              | SYNJ2_HUMAN Isoform 2A of Synaptojanin-2 OS=Homo sapiens GN=SYNJ2                                                      |           | 5.54    |
| O15061                | SYNEM_HUMAN Synemin OS=Homo sapiens GN=SYNM PE=1 SV=2                                                                  |           |         |



|                             |                                                                                                                                                                                                                           |           |        |
|-----------------------------|---------------------------------------------------------------------------------------------------------------------------------------------------------------------------------------------------------------------------|-----------|--------|
| O15061-2                    | SYNEM_HUMAN Isoform 2 of Synemin OS=Homo sapiens GN=SYNM                                                                                                                                                                  |           |        |
| O15061-3                    | SYNEM_HUMAN Isoform 3 of Synemin OS=Homo sapiens GN=SYNM                                                                                                                                                                  |           |        |
| O15061;O15061-2;C9JIE4      | SYNEM_HUMAN Synemin OS=Homo sapiens GN=SYNM PE=1 SV=2;>sp O15061-2 SYNEM_HUMAN Isoform 2 of Synemin OS=Homo sapiens GN=SYNM                                                                                               | 1.23E-06  |        |
| O15066                      | KIF3B_HUMAN Kinesin-like protein KIF3B OS=Homo sapiens GN=KIF3B PE=1 SV=1                                                                                                                                                 | 1.22E-13  |        |
| O15067                      | PUR4_HUMAN Phosphoribosylformylglycinamide synthase OS=Homo sapiens GN=PFAS PE=1 SV=4                                                                                                                                     | 7.02E-102 |        |
| O15069                      | NACAD_HUMAN NAC-alpha domain-containing protein 1 OS=Homo sapiens GN=NACAD PE=2 SV=3                                                                                                                                      |           | 92.85  |
| O15075                      | DCLK1_HUMAN Serine/threonine-protein kinase DCLK1 OS=Homo sapiens GN=DCLK1 PE=1 SV=2                                                                                                                                      |           |        |
| O15075-2                    | DCLK1_HUMAN Isoform 1 of Serine/threonine-protein kinase DCLK1 OS=Homo sapiens GN=DCLK1                                                                                                                                   |           |        |
| O15075-3                    | DCLK1_HUMAN Isoform 3 of Serine/threonine-protein kinase DCLK1 OS=Homo sapiens GN=DCLK1                                                                                                                                   |           |        |
| O15075-4                    | DCLK1_HUMAN Isoform 4 of Serine/threonine-protein kinase DCLK1 OS=Homo sapiens GN=DCLK1                                                                                                                                   |           |        |
| O15075;O15075-2             | DCLK1_HUMAN Serine/threonine-protein kinase DCLK1 OS=Homo sapiens GN=DCLK1 PE=1 SV=2;>sp O15075-2 DCLK1_HUMAN Isoform 1 of Serine/threonine-protein kinase DCLK1 OS=Homo sapiens GN=DCLK1                                 | 4.37E-14  |        |
| O15078;O15078-2             | CE290_HUMAN Centrosomal protein of 290 kDa OS=Homo sapiens GN=CEP290 PE=1 SV=2;>sp O15078-2 CE290_HUMAN Isoform 2 of Centrosomal protein of 290 kDa OS=Homo sapiens GN=CEP290                                             | 1.42E-11  |        |
| O15083                      | ERC2_HUMAN ERC protein 2 OS=Homo sapiens GN=ERC2 PE=1 SV=3                                                                                                                                                                |           |        |
| O15084-1;O15084-4;O15084-5  | ANR28_HUMAN Isoform 3 of Serine/threonine-protein phosphatase 6 regulatory ankyrin repeat subunit A OS=Homo sapiens GN=ANKRD28                                                                                            | 1.38E-10  |        |
| O15084;B4DES5;O15084-1      | ANR28_HUMAN Serine/threonine-protein phosphatase 6 regulatory ankyrin repeat subunit A OS=Homo sapiens GN=ANKRD28 PE=1 SV=1                                                                                               | 1.13E-13  |        |
| O15085                      | ARHGB_HUMAN Rho guanine nucleotide exchange factor 11 OS=Homo sapiens GN=ARHGEF11 PE=1 SV=1                                                                                                                               |           |        |
| O15091                      | MRRP3_HUMAN Mitochondrial ribonuclease P protein 3 OS=Homo sapiens GN=KIAA0391 PE=1 SV=2                                                                                                                                  |           |        |
| O15091-2                    | MRRP3_HUMAN Isoform 2 of Mitochondrial ribonuclease P protein 3 OS=Homo sapiens GN=KIAA0391                                                                                                                               |           |        |
| O15091-4                    | MRRP3_HUMAN Isoform 4 of Mitochondrial ribonuclease P protein 3 OS=Homo sapiens GN=KIAA0391                                                                                                                               |           |        |
| O15091;O15091-2;O15091-4    | MRRP3_HUMAN Mitochondrial ribonuclease P protein 3 OS=Homo sapiens GN=KIAA0391 PE=1 SV=2;>sp O15091-2 MRRP3_HUMAN Isoform 2 of Mitochondrial ribonuclease P protein 3 OS=Homo sapiens GN=KIAA0391                         | 3.09E-06  |        |
| O15118                      | NPC1_HUMAN Niemann-Pick C1 protein OS=Homo sapiens GN=NPC1 PE=1 SV=2                                                                                                                                                      |           | 163.7  |
| O15120                      | PLCB_HUMAN 1-acyl-sn-glycerol-3-phosphate acyltransferase beta OS=Homo sapiens GN=AGPAT2 PE=1 SV=1                                                                                                                        |           | 37.92  |
| O15120-2                    | PLCB_HUMAN Isoform 2 of 1-acyl-sn-glycerol-3-phosphate acyltransferase beta OS=Homo sapiens GN=AGPAT2                                                                                                                     |           | 37.92  |
| O15126                      | SCAM1_HUMAN Secretory carrier-associated membrane protein 1 OS=Homo sapiens GN=SCAMP1 PE=1 SV=2                                                                                                                           |           | 261.71 |
| O15126-2                    | SCAM1_HUMAN Isoform 2 of Secretory carrier-associated membrane protein 1 OS=Homo sapiens GN=SCAMP1                                                                                                                        |           | 94.55  |
| O15126;O15126-2             | SCAM1_HUMAN Secretory carrier-associated membrane protein 1 OS=Homo sapiens GN=SCAMP1 PE=1 SV=2;>sp O15126-2 SCAM1_HUMAN Isoform 2 of Secretory carrier-associated membrane protein 1 OS=Homo sapiens GN=SCAMP1           | 3.18E-43  |        |
| O15127                      | SCAM2_HUMAN Secretory carrier-associated membrane protein 2 OS=Homo sapiens GN=SCAMP2 PE=1 SV=2                                                                                                                           |           | 77.45  |
| O15131                      | IMA5_HUMAN Importin subunit alpha-6 OS=Homo sapiens GN=KPNA5 PE=1 SV=2                                                                                                                                                    |           |        |
| O15143                      | ARPC1B_HUMAN Actin-related protein 2/3 complex subunit 1B OS=Homo sapiens GN=ARPC1B PE=1 SV=3                                                                                                                             |           | 258.22 |
| O15144                      | ARPC2_HUMAN Actin-related protein 2/3 complex subunit 2 OS=Homo sapiens GN=ARPC2 PE=1 SV=1                                                                                                                                |           | 389.77 |
| O15145                      | ARPC3_HUMAN Actin-related protein 2/3 complex subunit 3 OS=Homo sapiens GN=ARPC3 PE=1 SV=3                                                                                                                                |           | 426.5  |
| O15155                      | BET1_HUMAN BET1 homolog OS=Homo sapiens GN=BET1 PE=1 SV=1                                                                                                                                                                 |           | 111.72 |
| O15160                      | RPAC1_HUMAN DNA-directed RNA polymerases I and III subunit RPAC1 OS=Homo sapiens GN=POLR1C PE=1 SV=1                                                                                                                      |           | 123.14 |
| O15160-2                    | RPAC1_HUMAN Isoform 2 of DNA-directed RNA polymerases I and III subunit RPAC1 OS=Homo sapiens GN=POLR1C                                                                                                                   |           | 124.12 |
| O15160;O15160-2             | RPAC1_HUMAN DNA-directed RNA polymerases I and III subunit RPAC1 OS=Homo sapiens GN=POLR1C PE=1 SV=1;>sp O15160-2 RPAC1_HUMAN Isoform 2 of DNA-directed RNA polymerases I and III subunit RPAC1 OS=Homo sapiens GN=POLR1C | 2.17E-13  |        |
| O15162                      | PLS1_HUMAN Phospholipid scramblase 1 OS=Homo sapiens GN=PLSCR1 PE=1 SV=1                                                                                                                                                  | 4.66E-27  |        |
| O15173                      | PGRC2_HUMAN Membrane-associated progesterone receptor component 2 OS=Homo sapiens GN=PGRMC2 PE=1 SV=1                                                                                                                     |           | 363.61 |
| O15182                      | CETN3_HUMAN Centrin-3 OS=Homo sapiens GN=CETN3 PE=2 SV=2                                                                                                                                                                  |           |        |
| O15205                      | UBD_HUMAN Ubiquitin D OS=Homo sapiens GN=UBD PE=1 SV=2                                                                                                                                                                    |           |        |
| O15212                      | PFD6_HUMAN Prefoldin subunit 6 OS=Homo sapiens GN=PFDN6 PE=1 SV=1                                                                                                                                                         | 2.46E-11  |        |
| O15226                      | NKRF_HUMAN NF-kappa-B-repressing factor OS=Homo sapiens GN=NKRF PE=1 SV=2                                                                                                                                                 |           |        |
| O15230                      | LAMA5_HUMAN Laminin subunit alpha-5 OS=Homo sapiens GN=LAMA5 PE=1 SV=8                                                                                                                                                    |           | 82.38  |
| O15231                      | ZN185_HUMAN Zinc finger protein 185 OS=Homo sapiens GN=ZNF185 PE=1 SV=3                                                                                                                                                   |           | 199.38 |
| O15231-2                    | ZN185_HUMAN Isoform 2 of Zinc finger protein 185 OS=Homo sapiens GN=ZNF185                                                                                                                                                |           | 154.13 |
| O15231-3                    | ZN185_HUMAN Isoform 3 of Zinc finger protein 185 OS=Homo sapiens GN=ZNF185                                                                                                                                                |           | 199.38 |
| O15231-3;O15231             | ZN185_HUMAN Isoform 3 of Zinc finger protein 185 OS=Homo sapiens GN=ZNF185;>sp O15231 ZN185_HUMAN Zinc finger protein 185 OS=Homo sapiens GN=ZNF185                                                                       | 1.54E-18  |        |
| O15235                      | RT12_HUMAN 28S ribosomal protein S12, mitochondrial OS=Homo sapiens GN=MRPS12 PE=1 SV=1                                                                                                                                   | 4.24E-07  |        |
| O15240                      | VGFB_HUMAN Neurosecretory protein VGF OS=Homo sapiens GN=VGFB PE=1 SV=2                                                                                                                                                   |           |        |
| O15245                      | S22A1_HUMAN Solute carrier family 22 member 1 OS=Homo sapiens GN=SLC22A1 PE=1 SV=2                                                                                                                                        |           |        |
| O15247                      | CLIC2_HUMAN Chloride intracellular channel protein 2 OS=Homo sapiens GN=CLIC2 PE=1 SV=3                                                                                                                                   |           | 57.09  |
| O15254;O15254-2             | ACOX3_HUMAN Peroxisomal acyl-coenzyme A oxidase 3 OS=Homo sapiens GN=ACOX3 PE=1 SV=2;>sp O15254-2 ACOX3_HUMAN Isoform 2 of Peroxisomal acyl-coenzyme A oxidase 3 OS=Homo sapiens GN=ACOX3                                 | 1.77E-05  |        |
| O15258                      | RER1_HUMAN Protein RER1 OS=Homo sapiens GN=RER1 PE=1 SV=1                                                                                                                                                                 |           | 150.01 |
| O15259                      | NPHP1_HUMAN Nephrocystin-1 OS=Homo sapiens GN=NPHP1 PE=1 SV=1                                                                                                                                                             |           |        |
| O15259-2                    | NPHP1_HUMAN Isoform 2 of Nephrocystin-1 OS=Homo sapiens GN=NPHP1                                                                                                                                                          |           |        |
| O15259-3                    | NPHP1_HUMAN Isoform 3 of Nephrocystin-1 OS=Homo sapiens GN=NPHP1                                                                                                                                                          |           |        |
| O15259-4                    | NPHP1_HUMAN Isoform 4 of Nephrocystin-1 OS=Homo sapiens GN=NPHP1                                                                                                                                                          |           |        |
| O15260                      | SURF4_HUMAN Surfeit locus protein 4 OS=Homo sapiens GN=SURF4 PE=1 SV=3                                                                                                                                                    |           | 371.1  |
| O15260-2                    | SURF4_HUMAN Isoform 2 of Surfeit locus protein 4 OS=Homo sapiens GN=SURF4                                                                                                                                                 |           | 371.1  |
| O15260;B7Z7A8;B7Z8F3;B7Z8F4 | SURF4_HUMAN Surfeit locus protein 4 OS=Homo sapiens GN=SURF4 PE=1 SV=3;>tr B7Z7A8 B7Z7A8_HUMAN cDNA FLJ50722, highly similar to SURF4 (AF040000)                                                                          | 1.57E-09  |        |
| O15264                      | MK13_HUMAN Mitogen-activated protein kinase 13 OS=Homo sapiens GN=MAPK13 PE=1 SV=1                                                                                                                                        |           | 50.95  |
| O15269                      | SPTLC1_HUMAN Serine palmitoyltransferase 1 OS=Homo sapiens GN=SPTLC1 PE=1 SV=1                                                                                                                                            | 2.86E-42  |        |

|                       |                                                                                                                                 |          |        |
|-----------------------|---------------------------------------------------------------------------------------------------------------------------------|----------|--------|
| O15270                | SPTC2_HUMAN Serine palmitoyltransferase 2 OS=Homo sapiens GN=SPTLC2 PE=1 SV=1                                                   | 1.71E-31 |        |
| O15294                | OGT1_HUMAN UDP-N-acetylglucosamine--peptide N-acetylglucosaminyltransferase 110 kDa subunit OS=Homo sapiens GN=OGT PE=1 SV=3    |          |        |
| O15294-2              | OGT1_HUMAN Isoform 2 of UDP-N-acetylglucosamine--peptide N-acetylglucosaminyltransferase 110 kDa subunit OS=Homo sapiens GN=OGT |          |        |
| O15294-3              | OGT1_HUMAN Isoform 1 of UDP-N-acetylglucosamine--peptide N-acetylglucosaminyltransferase 110 kDa subunit OS=Homo sapiens GN=OGT |          |        |
| O15294-4              | OGT1_HUMAN Isoform 4 of UDP-N-acetylglucosamine--peptide N-acetylglucosaminyltransferase 110 kDa subunit OS=Homo sapiens GN=OGT |          |        |
| O15294;O15294-3;O1529 | OGT1_HUMAN UDP-N-acetylglucosamine--peptide N-acetylglucosaminyltransferase 110 kDa subunit OS=Homo sapiens GN=OGT PE=1         | 8.63E-31 |        |
| O15296;O15296-4;O1529 | LX15B_HUMAN Arachidonate 15-lipoxygenase B OS=Homo sapiens GN=ALOX15B PE=2 SV=3;>sp O15296-4 LX15B_HUMAN Isoform                | 1.08E-16 |        |
| O15305                | PMM2_HUMAN Phosphomannomutase 2 OS=Homo sapiens GN=PMM2 PE=1 SV=1                                                               | 1.80E-24 |        |
| O15321                | TM9S1_HUMAN Transmembrane 9 superfamily member 1 OS=Homo sapiens GN=TM9SF1 PE=2 SV=2                                            |          |        |
| O15327                | INP4B_HUMAN Type II inositol-3,4-bisphosphate 4-phosphatase OS=Homo sapiens GN=INPP4B PE=2 SV=4                                 | 1.65E-34 |        |
| O15344;O15344-2       | TRI18_HUMAN Midline-1 OS=Homo sapiens GN=MID1 PE=1 SV=1;>sp O15344-2 TRI18_HUMAN Isoform 2 of Midline-1 OS=Homo sa              | 1.84E-11 |        |
| O15347                | HMGB3_HUMAN High mobility group protein B3 OS=Homo sapiens GN=HMGB3 PE=1 SV=4                                                   |          | 313.54 |
| O15355                | PPM1G_HUMAN Protein phosphatase 1G OS=Homo sapiens GN=PPM1G PE=1 SV=1                                                           |          | 292.57 |
| O15357                | SHIP2_HUMAN Phosphatidylinositol-3,4,5-trisphosphate 5-phosphatase 2 OS=Homo sapiens GN=INPPL1 PE=1 SV=2                        |          |        |
| O15357-2              | SHIP2_HUMAN Isoform 2 of Phosphatidylinositol-3,4,5-trisphosphate 5-phosphatase 2 OS=Homo sapiens GN=INPPL1                     |          |        |
| O15357;O15357-2       | SHIP2_HUMAN Phosphatidylinositol-3,4,5-trisphosphate 5-phosphatase 2 OS=Homo sapiens GN=INPPL1 PE=1 SV=2;>sp O15357-2 S         | 3.82E-14 |        |
| O15371                | EIF3D_HUMAN Eukaryotic translation initiation factor 3 subunit D OS=Homo sapiens GN=EIF3D PE=1 SV=1                             |          | 163.53 |
| O15372                | EIF3H_HUMAN Eukaryotic translation initiation factor 3 subunit H OS=Homo sapiens GN=EIF3H PE=1 SV=1                             |          | 560.26 |
| O15379                | HDAC3_HUMAN Histone deacetylase 3 OS=Homo sapiens GN=HDAC3 PE=1 SV=2                                                            |          |        |
| O15379-2              | HDAC3_HUMAN Isoform 2 of Histone deacetylase 3 OS=Homo sapiens GN=HDAC3                                                         |          |        |
| O15381                | NVL_HUMAN Nuclear valosin-containing protein-like OS=Homo sapiens GN=NVL PE=1 SV=1                                              |          |        |
| O15381-2              | NVL_HUMAN Isoform 2 of Nuclear valosin-containing protein-like OS=Homo sapiens GN=NVL                                           |          |        |
| O15381-3              | NVL_HUMAN Isoform 3 of Nuclear valosin-containing protein-like OS=Homo sapiens GN=NVL                                           |          |        |
| O15381;O15381-2;O1538 | NVL_HUMAN Nuclear valosin-containing protein-like OS=Homo sapiens GN=NVL PE=1 SV=1;>sp O15381-2 NVL_HUMAN Isoform 2 of          | 3.00E-27 |        |
| O15382                | BCAT2_HUMAN Branched-chain-amino-acid aminotransferase, mitochondrial OS=Homo sapiens GN=BCAT2 PE=1 SV=2                        |          | 141.48 |
| O15382-2              | BCAT2_HUMAN Isoform B of Branched-chain-amino-acid aminotransferase, mitochondrial OS=Homo sapiens GN=BCAT2                     |          | 109.74 |
| O15382;O15382-2       | BCAT2_HUMAN Branched-chain-amino-acid aminotransferase, mitochondrial OS=Homo sapiens GN=BCAT2 PE=1 SV=2;>sp O15382-2           | 1.62E-08 |        |
| O15391                | YY2_HUMAN Transcription factor YY2 OS=Homo sapiens GN=YY2 PE=2 SV=1                                                             |          |        |
| O15397                | IPO8_HUMAN Importin-8 OS=Homo sapiens GN=IPO8 PE=1 SV=2                                                                         | 3.94E-12 |        |
| O15399                | NMDE4_HUMAN Glutamate [NMDA] receptor subunit epsilon-4 OS=Homo sapiens GN=GRIN2D PE=1 SV=2                                     |          | 31.96  |
| O15400                | STX7_HUMAN Syntaxin-7 OS=Homo sapiens GN=STX7 PE=1 SV=4                                                                         |          | 383.92 |
| O15400-2              | STX7_HUMAN Isoform 2 of Syntaxin-7 OS=Homo sapiens GN=STX7                                                                      |          | 383.92 |
| O15400;O15400-2       | STX7_HUMAN Syntaxin-7 OS=Homo sapiens GN=STX7 PE=1 SV=4;>sp O15400-2 STX7_HUMAN Isoform 2 of Syntaxin-7 OS=Homo :               | 7.60E-11 |        |
| O15417                | TNC18_HUMAN Trinucleotide repeat-containing gene 18 protein OS=Homo sapiens GN=TNRC18 PE=1 SV=3                                 |          |        |
| O15417-2              | TNC18_HUMAN Isoform 2 of Trinucleotide repeat-containing gene 18 protein OS=Homo sapiens GN=TNRC18                              |          |        |
| O15427                | MOT4_HUMAN Monocarboxylate transporter 4 OS=Homo sapiens GN=SLC16A3 PE=1 SV=1                                                   |          | 341.21 |
| O15439                | MRP4_HUMAN Multidrug resistance-associated protein 4 OS=Homo sapiens GN=ABCC4 PE=1 SV=3                                         |          | 93.54  |
| O15439-2              | MRP4_HUMAN Isoform 2 of Multidrug resistance-associated protein 4 OS=Homo sapiens GN=ABCC4                                      |          | 93.54  |
| O15440                | MRP5_HUMAN Multidrug resistance-associated protein 5 OS=Homo sapiens GN=ABCC5 PE=1 SV=2                                         |          |        |
| O15446-2;A8K818;O1544 | 2 RPA34_HUMAN Isoform 2 of DNA-directed RNA polymerase I subunit RPA34 OS=Homo sapiens GN=CD3EAP;>tr A8K818 A8K818_H            | 3.39E-10 |        |
| O15455                | TLR3_HUMAN Toll-like receptor 3 OS=Homo sapiens GN=TLR3 PE=1 SV=1                                                               |          |        |
| O15460                | P4HA2_HUMAN Prolyl 4-hydroxylase subunit alpha-2 OS=Homo sapiens GN=P4HA2 PE=1 SV=1                                             |          | 25.63  |
| O15460-2              | P4HA2_HUMAN Isoform IIa of Prolyl 4-hydroxylase subunit alpha-2 OS=Homo sapiens GN=P4HA2                                        |          | 25.63  |
| O15460;O15460-2       | P4HA2_HUMAN Prolyl 4-hydroxylase subunit alpha-2 OS=Homo sapiens GN=P4HA2 PE=1 SV=1;>sp O15460-2 P4HA2_HUMAN Isofor             | 1.92E-13 |        |
| O15479                | MAGB2_HUMAN Melanoma-associated antigen B2 OS=Homo sapiens GN=MAGEB2 PE=1 SV=3                                                  | 8.48E-19 |        |
| O15480                | MAGB3_HUMAN Melanoma-associated antigen B3 OS=Homo sapiens GN=MAGEB3 PE=2 SV=2                                                  |          | 26.3   |
| O15484                | CAN5_HUMAN Calpain-5 OS=Homo sapiens GN=CAPN5 PE=1 SV=2                                                                         |          |        |
| O15498                | YKT6_HUMAN Synaptobrevin homolog YKT6 OS=Homo sapiens GN=YKT6 PE=1 SV=1                                                         |          | 18.58  |
| O15499                | GSC2_HUMAN Homeobox protein goosecoid-2 OS=Homo sapiens GN=GSC2 PE=2 SV=1                                                       |          |        |
| O15504                | NUPL2_HUMAN Nucleoporin-like protein 2 OS=Homo sapiens GN=NUPL2 PE=1 SV=1                                                       |          |        |
| O15504-3              | NUPL2_HUMAN Isoform 3 of Nucleoporin-like protein 2 OS=Homo sapiens GN=NUPL2                                                    |          |        |
| O15511                | ARPC5_HUMAN Actin-related protein 2/3 complex subunit 5 OS=Homo sapiens GN=ARPC5 PE=1 SV=3                                      |          | 136.11 |
| O15511-2              | ARPC5_HUMAN Isoform 2 of Actin-related protein 2/3 complex subunit 5 OS=Homo sapiens GN=ARPC5                                   |          | 91.52  |
| O15511;B1ALC0;O15511- | ARPC5_HUMAN Actin-related protein 2/3 complex subunit 5 OS=Homo sapiens GN=ARPC5 PE=1 SV=3;>tr B1ALC0 B1ALC0_HUMAN /            | 3.93E-18 |        |
| O15514                | RPB4_HUMAN DNA-directed RNA polymerase II subunit RPB4 OS=Homo sapiens GN=POLR2D PE=1 SV=1                                      |          | 62.23  |
| O15523                | DDX3Y_HUMAN ATP-dependent RNA helicase DDX3Y OS=Homo sapiens GN=DDX3Y PE=1 SV=2                                                 |          | 501.99 |
| O15525                | MAFG_HUMAN Transcription factor MafG OS=Homo sapiens GN=MAFG PE=1 SV=1                                                          |          |        |
| O15530                | PDPK1_HUMAN 3-phosphoinositide-dependent protein kinase 1 OS=Homo sapiens GN=PDPK1 PE=1 SV=1                                    |          |        |
| O15530-2              | PDPK1_HUMAN Isoform 2 of 3-phosphoinositide-dependent protein kinase 1 OS=Homo sapiens GN=PDPK1                                 |          |        |
| O15530-3              | PDPK1_HUMAN Isoform 3 of 3-phosphoinositide-dependent protein kinase 1 OS=Homo sapiens GN=PDPK1                                 |          |        |
| O15533                | TPSN_HUMAN Tapasin OS=Homo sapiens GN=TAPBP PE=1 SV=1                                                                           |          | 26.6   |

|                        |                                                                                                                               |           |         |
|------------------------|-------------------------------------------------------------------------------------------------------------------------------|-----------|---------|
| O15533-2               | TPSN_HUMAN Isoform 2 of Tapasin OS=Homo sapiens GN=TAPBP                                                                      |           | 26.6    |
| O15533-3               | TPSN_HUMAN Isoform 3 of Tapasin OS=Homo sapiens GN=TAPBP                                                                      |           | 26.6    |
| O15533-3;A2AB90;A2ABB3 | TPSN_HUMAN Isoform 3 of Tapasin OS=Homo sapiens GN=TAPBP;>tr A2AB90 A2AB90_HUMAN TAP binding protein (Tapasin) OS=H           | 4.85E-05  |         |
| O15540                 | FABP7_HUMAN Fatty acid-binding protein, brain OS=Homo sapiens GN=FABP7 PE=1 SV=3                                              | 9.80E-194 |         |
| O15541                 | R113A_HUMAN RING finger protein 113A OS=Homo sapiens GN=RN113A PE=1 SV=1                                                      | 1.77E-10  |         |
| O15551                 | CLD3_HUMAN Claudin-3 OS=Homo sapiens GN=CLDN3 PE=1 SV=1                                                                       |           | 79.62   |
| O43143                 | DHX15_HUMAN Putative pre-splicing factor ATP-dependent RNA helicase DHX15 OS=Homo sapiens GN=DHX15 PE=1 SV=2                  |           | 609.4   |
| O43143;B4E0S6          | DHX15_HUMAN Putative pre-mRNA-splicing factor ATP-dependent RNA helicase DHX15 OS=Homo sapiens GN=DHX15 PE=1 SV=2;>tr         | 1.27E-193 |         |
| O43148                 | MCES_HUMAN mRNA cap guanine-N7 methyltransferase OS=Homo sapiens GN=RNMT PE=1 SV=1                                            |           | 66.87   |
| O43148-2               | MCES_HUMAN Isoform 2 of mRNA cap guanine-N7 methyltransferase OS=Homo sapiens GN=RNMT                                         |           | 66.87   |
| O43148-2;O43148        | 2 MCES_HUMAN Isoform 2 of mRNA cap guanine-N7 methyltransferase OS=Homo sapiens GN=RNMT;>sp O43148 MCES_HUMAN mR              | 6.79E-13  |         |
| O43149                 | ZZEF1_HUMAN Zinc finger ZZ-type and EF-hand domain-containing protein 1 OS=Homo sapiens GN=ZZEF1 PE=1 SV=6                    |           | 49.33   |
| O43149-2               | ZZEF1_HUMAN Isoform 2 of Zinc finger ZZ-type and EF-hand domain-containing protein 1 OS=Homo sapiens GN=ZZEF1                 |           | 20.6    |
| O43149-3               | ZZEF1_HUMAN Isoform 3 of Zinc finger ZZ-type and EF-hand domain-containing protein 1 OS=Homo sapiens GN=ZZEF1                 |           | 2.94    |
| O43150                 | ASAP2_HUMAN Arf-GAP with SH3 domain, ANK repeat and PH domain-containing protein 2 OS=Homo sapiens GN=ASAP2 PE=1 SV=3         |           | 40.04   |
| O43150-2               | ASAP2_HUMAN Isoform 2 of Arf-GAP with SH3 domain, ANK repeat and PH domain-containing protein 2 OS=Homo sapiens GN=ASAP2      |           | 40.04   |
| O43151                 | TET3_HUMAN Methylcytosine dioxygenase TET3 OS=Homo sapiens GN=TET3 PE=2 SV=3                                                  |           |         |
| O43151-2               | TET3_HUMAN Isoform 2 of Methylcytosine dioxygenase TET3 OS=Homo sapiens GN=TET3                                               |           |         |
| O43151-3               | TET3_HUMAN Isoform 3 of Methylcytosine dioxygenase TET3 OS=Homo sapiens GN=TET3                                               |           |         |
| O43156                 | TTI1_HUMAN TEL2-interacting protein 1 homolog OS=Homo sapiens GN=TTI1 PE=1 SV=3                                               | 4.66E-05  |         |
| O43169                 | CYB5B_HUMAN Cytochrome b5 type B OS=Homo sapiens GN=CYB5B PE=1 SV=2                                                           |           | 301.24  |
| O43172                 | PRP4_HUMAN U4/U6 small nuclear ribonucleoprotein Prp4 OS=Homo sapiens GN=PRPF4 PE=1 SV=2                                      |           | 81.75   |
| O43172-2               | PRP4_HUMAN Isoform 2 of U4/U6 small nuclear ribonucleoprotein Prp4 OS=Homo sapiens GN=PRPF4                                   |           | 81.75   |
| O43172;O43172-2        | PRP4_HUMAN U4/U6 small nuclear ribonucleoprotein Prp4 OS=Homo sapiens GN=PRPF4 PE=1 SV=2;>sp O43172-2 PRP4_HUMAN Isc          | 3.65E-29  |         |
| O43175                 | SERA_HUMAN D-3-phosphoglycerate dehydrogenase OS=Homo sapiens GN=PHGDH PE=1 SV=4                                              |           |         |
| O43181                 | NDUS4_HUMAN NADH dehydrogenase [ubiquinone] iron-sulfur protein 4, mitochondrial OS=Homo sapiens GN=NDUFS4 PE=1 SV=1          |           |         |
| O43236                 | SEPT4_HUMAN Septin-4 OS=Homo sapiens GN=SEPT4 PE=1 SV=1                                                                       |           | 22.04   |
| O43236-2               | SEPT4_HUMAN Isoform 2 of Septin-4 OS=Homo sapiens GN=SEPT4                                                                    |           | 22.04   |
| O43236-3               | SEPT4_HUMAN Isoform 3 of Septin-4 OS=Homo sapiens GN=SEPT4                                                                    |           | 22.04   |
| O43236-4               | SEPT4_HUMAN Isoform 4 of Septin-4 OS=Homo sapiens GN=SEPT4                                                                    |           | 22.04   |
| O43236-5               | SEPT4_HUMAN Isoform 5 of Septin-4 OS=Homo sapiens GN=SEPT4                                                                    |           | 21.59   |
| O43236-6               | SEPT4_HUMAN Isoform ARTS of Septin-4 OS=Homo sapiens GN=SEPT4                                                                 |           | 0.45    |
| O43237                 | DC1L2_HUMAN Cytoplasmic dynein 1 light intermediate chain 2 OS=Homo sapiens GN=DYNC1L2 PE=1 SV=1                              |           | 281.75  |
| O43242                 | PSMD3_HUMAN 26S proteasome non-ATPase regulatory subunit 3 OS=Homo sapiens GN=PSMD3 PE=1 SV=2                                 |           | 1077.91 |
| O43252                 | PAPS1_HUMAN Bifunctional 3-phosphoadenosine 5-phosphosulfate synthase 1 OS=Homo sapiens GN=PAPSS1 PE=1 SV=2                   | 7.77E-45  |         |
| O43264                 | ZW10_HUMAN Centromere/kinetochore protein zw10 homolog OS=Homo sapiens GN=ZW10 PE=1 SV=3                                      | 8.08E-82  |         |
| O43272                 | PROD_HUMAN Proline dehydrogenase 1, mitochondrial OS=Homo sapiens GN=PRODH PE=1 SV=3                                          |           |         |
| O43272-1               | PROD_HUMAN Isoform 1 of Proline dehydrogenase 1, mitochondrial OS=Homo sapiens GN=PRODH                                       |           |         |
| O43272-2               | PROD_HUMAN Isoform 2 of Proline dehydrogenase 1, mitochondrial OS=Homo sapiens GN=PRODH                                       |           |         |
| O43278;O43278-2        | SPIT1_HUMAN Kunitz-type protease inhibitor 1 OS=Homo sapiens GN=SPINT1 PE=1 SV=2;>sp O43278-2 SPIT1_HUMAN Isoform 2 o         | 1.06E-11  |         |
| O43286                 | B4GT5_HUMAN Beta-1,4-galactosyltransferase 5 OS=Homo sapiens GN=B4GALT5 PE=2 SV=1                                             |           | 41.38   |
| O43290                 | SNUT1_HUMAN U4/U6.U5 tri-snRNP-associated protein 1 OS=Homo sapiens GN=SART1 PE=1 SV=1                                        |           | 168.59  |
| O43291                 | SPIT2_HUMAN Kunitz-type protease inhibitor 2 OS=Homo sapiens GN=SPINT2 PE=1 SV=2                                              |           |         |
| O43294;O43294-2        | TGFI1_HUMAN Transforming growth factor beta-1-induced transcript 1 protein OS=Homo sapiens GN=TGFB1I1 PE=1 SV=2;>sp O432      | 1.97E-26  |         |
| O43299                 | K0415_HUMAN Protein KIAA0415 OS=Homo sapiens GN=KIAA0415 PE=1 SV=2                                                            |           | 20.62   |
| O43301                 | HS12A_HUMAN Heat shock 70 kDa protein 12A OS=Homo sapiens GN=HSPA12A PE=1 SV=2                                                | 2.92E-10  |         |
| O43303                 | CP110_HUMAN Centriolar coiled-coil protein of 110 kDa OS=Homo sapiens GN=CCP110 PE=1 SV=3                                     |           |         |
| O43303-2               | CP110_HUMAN Isoform 2 of Centriolar coiled-coil protein of 110 kDa OS=Homo sapiens GN=CCP110                                  |           |         |
| O43313                 | ATMIN_HUMAN ATM interactor OS=Homo sapiens GN=ATMIN PE=1 SV=2                                                                 |           | 23.29   |
| O43313-2               | ATMIN_HUMAN Isoform 2 of ATM interactor OS=Homo sapiens GN=ATMIN                                                              |           | 21.37   |
| O43314                 | VIP2_HUMAN Inositol hexakisphosphate and diphosphoinositol-pentakisphosphate kinase 2 OS=Homo sapiens GN=PPIP5K2 PE=1 SV=3    |           | 46.8    |
| O43314-2               | VIP2_HUMAN Isoform 2 of Inositol hexakisphosphate and diphosphoinositol-pentakisphosphate kinase 2 OS=Homo sapiens GN=PPIP5K2 |           | 46.8    |
| O43324                 | MCA3_HUMAN Eukaryotic translation elongation factor 1 epsilon-1 OS=Homo sapiens GN=EEF1E1 PE=1 SV=1                           |           | 137.22  |
| O43325                 | LYRM1_HUMAN LYR motif-containing protein 1 OS=Homo sapiens GN=LYRM1 PE=2 SV=1                                                 |           |         |
| O43374                 | RASL2_HUMAN Ras GTPase-activating protein 4 OS=Homo sapiens GN=RASA4 PE=2 SV=2                                                |           |         |
| O43374-2               | RASL2_HUMAN Isoform 2 of Ras GTPase-activating protein 4 OS=Homo sapiens GN=RASA4                                             |           |         |
| O43390                 | HNRPR_HUMAN Heterogeneous nuclear ribonucleoprotein R OS=Homo sapiens GN=HNRNPR PE=1 SV=1                                     |           | 722.1   |
| O43390-2               | HNRPR_HUMAN Isoform 2 of Heterogeneous nuclear ribonucleoprotein R OS=Homo sapiens GN=HNRNPR                                  |           | 682.83  |
| O43390;O43390-2        | HNRPR_HUMAN Heterogeneous nuclear ribonucleoprotein R OS=Homo sapiens GN=HNRNPR PE=1 SV=1;>sp O43390-2 HNRPR_HUM/             | 0         |         |
| O43395                 | PRPF3_HUMAN U4/U6 small nuclear ribonucleoprotein Prp3 OS=Homo sapiens GN=PRPF3 PE=1 SV=2                                     |           | 146.84  |
| O43396                 | TXNL1_HUMAN Thioredoxin-like protein 1 OS=Homo sapiens GN=TXNL1 PE=1 SV=3                                                     | 3.42E-206 |         |

|                             |                                                                                                                              |           |        |
|-----------------------------|------------------------------------------------------------------------------------------------------------------------------|-----------|--------|
| O43399                      | TPD54_HUMAN Tumor protein D54 OS=Homo sapiens GN=TPD52L2 PE=1 SV=2                                                           |           | 463.42 |
| O43399-2                    | TPD54_HUMAN Isoform 2 of Tumor protein D54 OS=Homo sapiens GN=TPD52L2                                                        |           | 392.6  |
| O43399-3                    | TPD54_HUMAN Isoform 3 of Tumor protein D54 OS=Homo sapiens GN=TPD52L2                                                        |           | 392.6  |
| O43399-3;O43399-4;O43399-4  | TPD54_HUMAN Isoform 3 of Tumor protein D54 OS=Homo sapiens GN=TPD52L2;>sp O43399-4 TPD54_HUMAN Isoform 4 of Tumor            | 2.76E-162 |        |
| O43399-4                    | TPD54_HUMAN Isoform 4 of Tumor protein D54 OS=Homo sapiens GN=TPD52L2                                                        |           | 392.6  |
| O43402                      | CX4NB_HUMAN Neighbor of COX4 OS=Homo sapiens GN=COX4NB PE=1 SV=1                                                             |           | 154.76 |
| O43414;B4DN03;C9JA75;O43423 | ERI3_HUMAN ERI1 exoribonuclease 3 OS=Homo sapiens GN=ERI3 PE=1 SV=2;>tr B4DN03 B4DN03_HUMAN Prion protein interacting        | 3.02E-15  |        |
| O43427;O43427-2             | AN32C_HUMAN Acidic leucine-rich nuclear phosphoprotein 32 family member C OS=Homo sapiens GN=ANP32C PE=2 SV=1                |           | 116.02 |
| O43432                      | FIBP_HUMAN Acidic fibroblast growth factor intracellular-binding protein OS=Homo sapiens GN=FIBP PE=1 SV=3;>sp O43427-2 FIBP | 5.94E-06  |        |
| O43432-2                    | IF4G3_HUMAN Eukaryotic translation initiation factor 4 gamma 3 OS=Homo sapiens GN=EIF4G3 PE=1 SV=2                           |           | 176.18 |
| O43447                      | IF4G3_HUMAN Isoform 2 of Eukaryotic translation initiation factor 4 gamma 3 OS=Homo sapiens GN=EIF4G3                        |           | 5.57   |
| O43448                      | PPIH_HUMAN Peptidyl-prolyl cis-trans isomerase H OS=Homo sapiens GN=PPIH PE=1 SV=1                                           |           | 136.69 |
| O43464                      | KCAB3_HUMAN Voltage-gated potassium channel subunit beta-3 OS=Homo sapiens GN=KCAB3 PE=1 SV=2                                |           |        |
| O43464-2                    | HTRA2_HUMAN Serine protease HTRA2, mitochondrial OS=Homo sapiens GN=HTRA2 PE=1 SV=2                                          |           | 56.21  |
| O43464-3                    | HTRA2_HUMAN Isoform 2 of Serine protease HTRA2, mitochondrial OS=Homo sapiens GN=HTRA2                                       |           | 43.72  |
| O43464-4                    | HTRA2_HUMAN Isoform 3 of Serine protease HTRA2, mitochondrial OS=Homo sapiens GN=HTRA2                                       |           | 56.21  |
| O43464;A8K7G2;O43464-4      | HTRA2_HUMAN Isoform 4 of Serine protease HTRA2, mitochondrial OS=Homo sapiens GN=HTRA2                                       |           | 56.21  |
| O43488                      | HTRA2_HUMAN Serine protease HTRA2, mitochondrial OS=Homo sapiens GN=HTRA2 PE=1 SV=2;>tr A8K7G2 A8K7G2_HUMAN cDNA             | 5.47E-13  |        |
| O43490;O43490-2;O43491      | ARK72_HUMAN Aflatoxin B1 aldehyde reductase member 2 OS=Homo sapiens GN=AKR7A2 PE=1 SV=3                                     |           | 96.51  |
| O43493                      | PROM1_HUMAN Prominin-1 OS=Homo sapiens GN=PROM1 PE=1 SV=1;>sp O43490-2 PROM1_HUMAN Isoform 2 of Prominin-1 OS=H              | 1.48E-67  |        |
| O43493-2                    | E41L2_HUMAN Band 4.1-like protein 2 OS=Homo sapiens GN=EPB41L2 PE=1 SV=1                                                     |           | 260.43 |
| O43493-3                    | TGON2_HUMAN Trans-Golgi network integral membrane protein 2 OS=Homo sapiens GN=TGOLN2 PE=1 SV=2                              |           | 210    |
| O43493-4                    | TGON2_HUMAN Isoform TGN46 of Trans-Golgi network integral membrane protein 2 OS=Homo sapiens GN=TGOLN2                       |           | 210    |
| O43493-5                    | TGON2_HUMAN Isoform TGN48 of Trans-Golgi network integral membrane protein 2 OS=Homo sapiens GN=TGOLN2                       |           | 210    |
| O43493-6                    | TGON2_HUMAN Isoform 4 of Trans-Golgi network integral membrane protein 2 OS=Homo sapiens GN=TGOLN2                           |           | 183.21 |
| O43493;O43493-3;O43497      | TGON2_HUMAN Isoform 5 of Trans-Golgi network integral membrane protein 2 OS=Homo sapiens GN=TGOLN2                           |           | 210    |
| O43497-10                   | TGON2_HUMAN Isoform 6 of Trans-Golgi network integral membrane protein 2 OS=Homo sapiens GN=TGOLN2                           |           | 79.52  |
| O43497-11                   | TGON2_HUMAN Trans-Golgi network integral membrane protein 2 OS=Homo sapiens GN=TGOLN2 PE=1 SV=2;>sp O43493-3 TGON2           | 7.54E-151 |        |
| O43497-12                   | CAC1G_HUMAN Voltage-dependent T-type calcium channel subunit alpha-1G OS=Homo sapiens GN=CACNA1G PE=2 SV=3                   |           |        |
| O43497-13                   | CAC1G_HUMAN Isoform 10 of Voltage-dependent T-type calcium channel subunit alpha-1G OS=Homo sapiens GN=CACNA1G               |           |        |
| O43497-2                    | CAC1G_HUMAN Isoform 11 of Voltage-dependent T-type calcium channel subunit alpha-1G OS=Homo sapiens GN=CACNA1G               |           |        |
| O43497-3                    | CAC1G_HUMAN Isoform 12 of Voltage-dependent T-type calcium channel subunit alpha-1G OS=Homo sapiens GN=CACNA1G               |           |        |
| O43497-4                    | CAC1G_HUMAN Isoform 13 of Voltage-dependent T-type calcium channel subunit alpha-1G OS=Homo sapiens GN=CACNA1G               |           |        |
| O43497-5                    | CAC1G_HUMAN Isoform 1 of Voltage-dependent T-type calcium channel subunit alpha-1G OS=Homo sapiens GN=CACNA1G                |           |        |
| O43497-6                    | CAC1G_HUMAN Isoform 2 of Voltage-dependent T-type calcium channel subunit alpha-1G OS=Homo sapiens GN=CACNA1G                |           |        |
| O43497-7                    | CAC1G_HUMAN Isoform 3 of Voltage-dependent T-type calcium channel subunit alpha-1G OS=Homo sapiens GN=CACNA1G                |           |        |
| O43497-8                    | CAC1G_HUMAN Isoform 4 of Voltage-dependent T-type calcium channel subunit alpha-1G OS=Homo sapiens GN=CACNA1G                |           |        |
| O43497-9                    | CAC1G_HUMAN Isoform 6 of Voltage-dependent T-type calcium channel subunit alpha-1G OS=Homo sapiens GN=CACNA1G                |           |        |
| O43504                      | CAC1G_HUMAN Isoform 7 of Voltage-dependent T-type calcium channel subunit alpha-1G OS=Homo sapiens GN=CACNA1G                |           |        |
| O43520                      | CAC1G_HUMAN Isoform 8 of Voltage-dependent T-type calcium channel subunit alpha-1G OS=Homo sapiens GN=CACNA1G                |           |        |
| O43548                      | CAC1G_HUMAN Isoform 9 of Voltage-dependent T-type calcium channel subunit alpha-1G OS=Homo sapiens GN=CACNA1G                |           |        |
| O43548-2                    | HBXIP_HUMAN Hepatitis B virus X-interacting protein OS=Homo sapiens GN=HBXIP PE=1 SV=1                                       | 1.28E-09  |        |
| O43570                      | AT8B1_HUMAN Probable phospholipid-transporting ATPase IC OS=Homo sapiens GN=ATP8B1 PE=1 SV=3                                 |           | 27.33  |
| O43570-2                    | TGM5_HUMAN Protein-glutamine gamma-glutamyltransferase 5 OS=Homo sapiens GN=TGM5 PE=1 SV=4                                   |           | 33.68  |
| O43583                      | TGM5_HUMAN Isoform Short of Protein-glutamine gamma-glutamyltransferase 5 OS=Homo sapiens GN=TGM5                            |           | 33.68  |
| O43592                      | CAH12_HUMAN Carbonic anhydrase 12 OS=Homo sapiens GN=CA12 PE=1 SV=1                                                          |           |        |
| O43598                      | CAH12_HUMAN Isoform 2 of Carbonic anhydrase 12 OS=Homo sapiens GN=CA12                                                       |           |        |
| O43615                      | CAH12_HUMAN Carbonic anhydrase 12 OS=Homo sapiens GN=CA12 PE=1 SV=1;>sp O43570-2 CAH12_HUMAN Isoform 2 of Carboni            | 1.23E-08  |        |
| O43617                      | DENR_HUMAN Density-regulated protein OS=Homo sapiens GN=DENR PE=1 SV=2                                                       |           | 59.37  |
| O43633                      | XPOT_HUMAN Exportin-T OS=Homo sapiens GN=XPOT PE=1 SV=2                                                                      | 0         |        |
| O43660                      | RCL_HUMAN Deoxyribonucleoside 5-monophosphate N-glycosidase OS=Homo sapiens GN=RCL PE=1 SV=1                                 | 5.96E-19  |        |
| O43660-2                    | TIM44_HUMAN Mitochondrial import inner membrane translocase subunit TIM44 OS=Homo sapiens GN=TIMM44 PE=1 SV=2                |           | 290.29 |
| O43663                      | TPPC3_HUMAN Trafficking protein particle complex subunit 3 OS=Homo sapiens GN=TRAPPC3 PE=1 SV=1                              |           | 26.27  |
| O43663-2                    | CHM2A_HUMAN Charged multivesicular body protein 2a OS=Homo sapiens GN=CHMP2A PE=1 SV=1                                       | 8.86E-09  |        |
| O43665                      | PLRG1_HUMAN Pleiotropic regulator 1 OS=Homo sapiens GN=PLRG1 PE=1 SV=1                                                       |           | 38.54  |
| O43665-2                    | PLRG1_HUMAN Isoform 2 of Pleiotropic regulator 1 OS=Homo sapiens GN=PLRG1                                                    |           | 38.54  |
| O43666;O43660-2             | PLRG1_HUMAN Pleiotropic regulator 1 OS=Homo sapiens GN=PLRG1 PE=1 SV=1;>sp O43660-2 PLRG1_HUMAN Isoform 2 of Pleiotro        | 1.07E-08  |        |
| O43663-3                    | PRC1_HUMAN Protein regulator of cytokinesis 1 OS=Homo sapiens GN=PRC1 PE=1 SV=2                                              |           |        |
| O43665                      | PRC1_HUMAN Isoform 2 of Protein regulator of cytokinesis 1 OS=Homo sapiens GN=PRC1                                           |           |        |
| O43665-2                    | PRC1_HUMAN Isoform 3 of Protein regulator of cytokinesis 1 OS=Homo sapiens GN=PRC1                                           |           |        |
| O43665-3                    | RGS10_HUMAN Regulator of G-protein signaling 10 OS=Homo sapiens GN=RGS10 PE=1 SV=2                                           |           | 168.38 |

|                          |                                                                                                                        |           |         |
|--------------------------|------------------------------------------------------------------------------------------------------------------------|-----------|---------|
| O43665-2                 | RGS10_HUMAN Isoform 2 of Regulator of G-protein signaling 10 OS=Homo sapiens GN=RGS10                                  |           | 168.38  |
| O43665-3                 | RGS10_HUMAN Isoform 3 of Regulator of G-protein signaling 10 OS=Homo sapiens GN=RGS10                                  |           | 200.76  |
| O43665-3;O43665;O43665   | 3 RGS10_HUMAN Isoform 3 of Regulator of G-protein signaling 10 OS=Homo sapiens GN=RGS10;>sp O43665 RGS10_HUMAN Regula  | 4.35E-69  |         |
| O43670                   | ZN207_HUMAN Zinc finger protein 207 OS=Homo sapiens GN=ZNF207 PE=1 SV=1                                                |           | 37.22   |
| O43670-2                 | ZN207_HUMAN Isoform 2 of Zinc finger protein 207 OS=Homo sapiens GN=ZNF207                                             |           | 37.22   |
| O43670-3                 | ZN207_HUMAN Isoform 3 of Zinc finger protein 207 OS=Homo sapiens GN=ZNF207                                             |           |         |
| O43670;O43670-2          | ZN207_HUMAN Zinc finger protein 207 OS=Homo sapiens GN=ZNF207 PE=1 SV=1;>sp O43670-2 ZN207_HUMAN Isoform 2 of Zinc f   | 1.04E-65  |         |
| O43674                   | NDUB5_HUMAN NADH dehydrogenase [ubiquinone] 1 beta subcomplex subunit 5, mitochondrial OS=Homo sapiens GN=NDUFB5 PE=1  | 2.07E-12  |         |
| O43676                   | NDUB3_HUMAN NADH dehydrogenase [ubiquinone] 1 beta subcomplex subunit 3 OS=Homo sapiens GN=NDUFB3 PE=1 SV=3            |           | 59.4    |
| O43678                   | NDUA2_HUMAN NADH dehydrogenase [ubiquinone] 1 alpha subcomplex subunit 2 OS=Homo sapiens GN=NDUFA2 PE=1 SV=3           |           |         |
| O43681                   | ASNA_HUMAN ATPase ASNA1 OS=Homo sapiens GN=ASNA1 PE=1 SV=2                                                             |           | 76.42   |
| O43683                   | BUB1_HUMAN Mitotic checkpoint serine/threonine-protein kinase BUB1 OS=Homo sapiens GN=BUB1 PE=1 SV=1                   | 4.13E-20  |         |
| O43684                   | BUB3_HUMAN Mitotic checkpoint protein BUB3 OS=Homo sapiens GN=BUB3 PE=1 SV=1                                           |           | 253.53  |
| O43684-2                 | BUB3_HUMAN Isoform 2 of Mitotic checkpoint protein BUB3 OS=Homo sapiens GN=BUB3                                        |           | 253.53  |
| O43684;O43684-2          | BUB3_HUMAN Mitotic checkpoint protein BUB3 OS=Homo sapiens GN=BUB3 PE=1 SV=1;>sp O43684-2 BUB3_HUMAN Isoform 2 of M    | 2.15E-110 |         |
| O43688                   | LPP2_HUMAN Lipid phosphate phosphohydrolase 2 OS=Homo sapiens GN=PPAP2C PE=1 SV=1                                      |           | 44.73   |
| O43688-2                 | LPP2_HUMAN Isoform 2 of Lipid phosphate phosphohydrolase 2 OS=Homo sapiens GN=PPAP2C                                   |           | 44.73   |
| O43688-2;O43688          | 2 LPP2_HUMAN Isoform 2 of Lipid phosphate phosphohydrolase 2 OS=Homo sapiens GN=PPAP2C;>sp O43688 LPP2_HUMAN Lipid pho | 2.07E-06  |         |
| O43707                   | ACTN4_HUMAN Alpha-actinin-4 OS=Homo sapiens GN=ACTN4 PE=1 SV=2                                                         |           | 3415.39 |
| O43708;O43708-2          | MAAI_HUMAN Maleylacetoacetate isomerase OS=Homo sapiens GN=GSTZ1 PE=1 SV=3;>sp O43708-2 MAAI_HUMAN Isoform 2 of Ma     | 9.89E-08  |         |
| O43709                   | WBS22_HUMAN Uncharacterized methyltransferase WBSCR22 OS=Homo sapiens GN=WBSCR22 PE=1 SV=2                             |           | 36.22   |
| O43709-2                 | WBS22_HUMAN Isoform 2 of Uncharacterized methyltransferase WBSCR22 OS=Homo sapiens GN=WBSCR22                          |           | 36.22   |
| O43711                   | TLX3_HUMAN T-cell leukemia homeobox protein 3 OS=Homo sapiens GN=TLX3 PE=1 SV=3                                        |           |         |
| O43719                   | HTSF1_HUMAN HIV Tat-specific factor 1 OS=Homo sapiens GN=HTATSF1 PE=1 SV=1                                             |           |         |
| O43731                   | ERD23_HUMAN ER lumen protein retaining receptor 3 OS=Homo sapiens GN=KDEL3 PE=2 SV=1                                   |           | 28.17   |
| O43731-2                 | ERD23_HUMAN Isoform 2 of ER lumen protein retaining receptor 3 OS=Homo sapiens GN=KDEL3                                |           | 28.17   |
| O43747                   | AP1G1_HUMAN AP-1 complex subunit gamma-1 OS=Homo sapiens GN=AP1G1 PE=1 SV=5                                            |           | 31.27   |
| O43747-2                 | AP1G1_HUMAN Isoform 2 of AP-1 complex subunit gamma-1 OS=Homo sapiens GN=AP1G1                                         |           | 31.27   |
| O43747-2;O43747          | 2 AP1G1_HUMAN Isoform 2 of AP-1 complex subunit gamma-1 OS=Homo sapiens GN=AP1G1;>sp O43747 AP1G1_HUMAN AP-1 com       | 5.64E-74  |         |
| O43752                   | STX6_HUMAN Syntaxin-6 OS=Homo sapiens GN=STX6 PE=1 SV=1                                                                |           | 116.34  |
| O43760                   | SNG2_HUMAN Synaptogyrin-2 OS=Homo sapiens GN=SYNGR2 PE=1 SV=1                                                          |           | 214.72  |
| O43761                   | SNG3_HUMAN Synaptogyrin-3 OS=Homo sapiens GN=SYNGR3 PE=2 SV=2                                                          | 6.39E-09  |         |
| O43763                   | TLX2_HUMAN T-cell leukemia homeobox protein 2 OS=Homo sapiens GN=TLX2 PE=1 SV=2                                        |           |         |
| O43765                   | SGTA_HUMAN Small glutamine-rich tetratricopeptide repeat-containing protein alpha OS=Homo sapiens GN=SGTA PE=1 SV=1    |           | 104.07  |
| O43768-3;O43768-7;O43768 | 3 ENSA_HUMAN Isoform 3 of Alpha-endosulfine OS=Homo sapiens GN=ENSA;>sp O43768-7 ENSA_HUMAN Isoform 7 of Alpha-endos   | 4.68E-06  |         |
| O43768-4;O43768-3;O43768 | 4 ENSA_HUMAN Isoform 4 of Alpha-endosulfine OS=Homo sapiens GN=ENSA;>sp O43768-3 ENSA_HUMAN Isoform 3 of Alpha-endos   | 8.38E-67  |         |
| O43772                   | MCAT_HUMAN Mitochondrial carnitine/acylcarnitine carrier protein OS=Homo sapiens GN=SLC25A20 PE=1 SV=1                 |           |         |
| O43776                   | SYNC_HUMAN Asparaginyl-tRNA synthetase, cytoplasmic OS=Homo sapiens GN=NARS PE=1 SV=1                                  |           | 237.57  |
| O43790                   | KRT86_HUMAN Keratin, type II cuticular Hb6 OS=Homo sapiens GN=KRT86 PE=1 SV=1                                          |           | 81.03   |
| O43795                   | MYO1B_HUMAN Myosin-Ib OS=Homo sapiens GN=MYO1B PE=1 SV=3                                                               |           | 624.13  |
| O43795-2                 | MYO1B_HUMAN Isoform 2 of Myosin-Ib OS=Homo sapiens GN=MYO1B                                                            |           | 624.13  |
| O43795;O43795-2          | MYO1B_HUMAN Myosin-Ib OS=Homo sapiens GN=MYO1B PE=2 SV=3;>sp O43795-2 MYO1B_HUMAN Isoform 2 of Myosin-Ib OS=Hor        | 4.89E-50  |         |
| O43805                   | SSNA1_HUMAN Sjogren syndrome nuclear autoantigen 1 OS=Homo sapiens GN=SSNA1 PE=1 SV=2                                  | 2.53E-09  |         |
| O43809                   | CPSF5_HUMAN Cleavage and polyadenylation specificity factor subunit 5 OS=Homo sapiens GN=NUDT21 PE=1 SV=1              |           | 586.94  |
| O43813                   | LANC1_HUMAN LanC-like protein 1 OS=Homo sapiens GN=LANCL1 PE=1 SV=1                                                    | 1.96E-07  |         |
| O43815;O43815-2          | STRN_HUMAN Striatin OS=Homo sapiens GN=STRN PE=1 SV=4;>sp O43815-2 STRN_HUMAN Isoform 2 of Striatin OS=Homo sapien:    | 2.31E-15  |         |
| O43818                   | U3IP2_HUMAN U3 small nucleolar RNA-interacting protein 2 OS=Homo sapiens GN=RRP9 PE=1 SV=1                             |           |         |
| O43823                   | AKAP8_HUMAN A-kinase anchor protein 8 OS=Homo sapiens GN=AKAP8 PE=1 SV=1                                               |           |         |
| O43829                   | ZF161_HUMAN Zinc finger protein 161 homolog OS=Homo sapiens GN=ZFP161 PE=2 SV=2                                        |           |         |
| O43837                   | IDH3B_HUMAN Isocitrate dehydrogenase [NAD] subunit beta, mitochondrial OS=Homo sapiens GN=IDH3B PE=1 SV=2              |           | 208.08  |
| O43837-2                 | IDH3B_HUMAN Isoform A of Isocitrate dehydrogenase [NAD] subunit beta, mitochondrial OS=Homo sapiens GN=IDH3B           |           | 172.16  |
| O43837-3                 | IDH3B_HUMAN Isoform C of Isocitrate dehydrogenase [NAD] subunit beta, mitochondrial OS=Homo sapiens GN=IDH3B           |           | 98.71   |
| O43837;O43837-2          | IDH3B_HUMAN Isocitrate dehydrogenase [NAD] subunit beta, mitochondrial OS=Homo sapiens GN=IDH3B PE=1 SV=2;>sp O43837-2 | 1.13E-91  |         |
| O43847-2;O43847          | 2 NRDC_HUMAN Isoform 2 of Nardilysin OS=Homo sapiens GN=NRD1;>sp O43847 NRDC_HUMAN Nardilysin OS=Homo sapiens GN=      | 1.16E-14  |         |
| O43852                   | CALU_HUMAN Calumenin OS=Homo sapiens GN=CALU PE=1 SV=2                                                                 |           | 1012.32 |
| O43852-2                 | CALU_HUMAN Isoform 2 of Calumenin OS=Homo sapiens GN=CALU                                                              |           | 989.13  |
| O43852;O43852-2          | CALU_HUMAN Calumenin OS=Homo sapiens GN=CALU PE=1 SV=2;>sp O43852-2 CALU_HUMAN Isoform 2 of Calumenin OS=Homo s        | 4.00E-112 |         |
| O43865;O43865-2          | SAHH2_HUMAN Putative adenosylhomocysteinase 2 OS=Homo sapiens GN=AHCYL1 PE=1 SV=2;>sp O43865-2 SAHH2_HUMAN Isofo       | 1.85E-26  |         |
| O43866                   | CD5L_HUMAN CD5 antigen-like OS=Homo sapiens GN=CD5L PE=1 SV=1                                                          | 2.96E-50  |         |
| O43869                   | OR2T1_HUMAN Olfactory receptor 2T1 OS=Homo sapiens GN=OR2T1 PE=2 SV=3                                                  |           |         |
| O43896                   | KIF1C_HUMAN Kinesin-like protein KIF1C OS=Homo sapiens GN=KIF1C PE=1 SV=3                                              |           |         |



|                       |                                                                                                                                      |            |        |
|-----------------------|--------------------------------------------------------------------------------------------------------------------------------------|------------|--------|
| O43913                | ORC5_HUMAN Origin recognition complex subunit 5 OS=Homo sapiens GN=ORC5 PE=1 SV=1                                                    |            |        |
| O43914;O43914-2       | TYOBP_HUMAN TYRO protein tyrosine kinase-binding protein OS=Homo sapiens GN=TYROBP PE=1 SV=1;>sp O43914-2 TYOBP_HUM                  | 1.23E-29   |        |
| O43920                | NDUS5_HUMAN NADH dehydrogenase [ubiquinone] iron-sulfur protein 5 OS=Homo sapiens GN=NDUFS5 PE=1 SV=3                                |            | 232.98 |
| O43924                | PDE6D_HUMAN Retinal rod rhodopsin-sensitive cGMP 3,5-cyclic phosphodiesterase subunit delta OS=Homo sapiens GN=PDE6D PE=1 :          | 9.39E-05   |        |
| O43929                | ORC4_HUMAN Origin recognition complex subunit 4 OS=Homo sapiens GN=ORC4 PE=1 SV=2                                                    |            | 32.73  |
| O60216                | RAD21_HUMAN Double-strand-break repair protein rad21 homolog OS=Homo sapiens GN=RAD21 PE=1 SV=2                                      |            |        |
| O60218                | AK1BA_HUMAN Aldo-keto reductase family 1 member B10 OS=Homo sapiens GN=AKR1B10 PE=1 SV=2                                             | 0.00013979 |        |
| O60220                | TIM8A_HUMAN Mitochondrial import inner membrane translocase subunit Tim8 A OS=Homo sapiens GN=TIMM8A PE=1 SV=1                       |            | 38.91  |
| O60231                | DHX16_HUMAN Putative pre-splicing factor ATP-dependent RNA helicase DHX16 OS=Homo sapiens GN=DHX16 PE=1 SV=2                         |            | 158.56 |
| O60232                | SSA27_HUMAN Sjogren syndrome/scleroderma autoantigen 1 OS=Homo sapiens GN=SSSCA1 PE=1 SV=1                                           | 2.56E-38   |        |
| O60234                | GMFG_HUMAN Glia maturation factor gamma OS=Homo sapiens GN=GMFG PE=1 SV=1                                                            | 7.84E-21   |        |
| O60238                | BNI3L_HUMAN BCL2/adenovirus E1B 19 kDa protein-interacting protein 3-like OS=Homo sapiens GN=BNIP3L PE=1 SV=1                        |            |        |
| O60239;B2R7Y8;B3KQW6  | 3BP5_HUMAN SH3 domain-binding protein 5 OS=Homo sapiens GN=SH3BP5 PE=1 SV=2;>tr B2R7Y8 B2R7Y8_HUMAN cDNA, FLJ9366                    | 5.36E-06   |        |
| O60240                | PLIN1_HUMAN Perilipin-1 OS=Homo sapiens GN=PLIN1 PE=2 SV=2                                                                           | 1.18E-291  |        |
| O60244                | MED14_HUMAN Mediator of RNA polymerase II transcription subunit 14 OS=Homo sapiens GN=MED14 PE=1 SV=2                                |            |        |
| O60256                | KPRB_HUMAN Phosphoribosyl pyrophosphate synthase-associated protein 2 OS=Homo sapiens GN=PRPSAP2 PE=1 SV=1                           | 1.03E-15   |        |
| O60264                | SMCA5_HUMAN SWI/SNF-related matrix-associated actin-dependent regulator of chromatin subfamily A member 5 OS=Homo sapiens GN=SMARCA5 |            | 194.93 |
| O60271                | JIP4_HUMAN C-Jun-amino-terminal kinase-interacting protein 4 OS=Homo sapiens GN=SPAG9 PE=1 SV=4                                      |            |        |
| O60271-2              | JIP4_HUMAN Isoform 2 of C-Jun-amino-terminal kinase-interacting protein 4 OS=Homo sapiens GN=SPAG9                                   |            |        |
| O60271-3              | JIP4_HUMAN Isoform 3 of C-Jun-amino-terminal kinase-interacting protein 4 OS=Homo sapiens GN=SPAG9                                   |            |        |
| O60271-4              | JIP4_HUMAN Isoform 4 of C-Jun-amino-terminal kinase-interacting protein 4 OS=Homo sapiens GN=SPAG9                                   |            |        |
| O60271-4;O60271;O6027 | 4 JIP4_HUMAN Isoform 4 of C-Jun-amino-terminal kinase-interacting protein 4 OS=Homo sapiens GN=SPAG9;>sp O60271 JIP4_HUM.            | 1.38E-78   |        |
| O60271-5              | JIP4_HUMAN Isoform 5 of C-Jun-amino-terminal kinase-interacting protein 4 OS=Homo sapiens GN=SPAG9                                   |            |        |
| O60271-6              | JIP4_HUMAN Isoform 6 of C-Jun-amino-terminal kinase-interacting protein 4 OS=Homo sapiens GN=SPAG9                                   |            |        |
| O60271-7              | JIP4_HUMAN Isoform 7 of C-Jun-amino-terminal kinase-interacting protein 4 OS=Homo sapiens GN=SPAG9                                   |            |        |
| O60271-7;O60271-3;O60 | 7 JIP4_HUMAN Isoform 7 of C-Jun-amino-terminal kinase-interacting protein 4 OS=Homo sapiens GN=SPAG9;>sp O60271-3 JIP4_HU            | 2.28E-70   |        |
| O60271-8              | JIP4_HUMAN Isoform 8 of C-Jun-amino-terminal kinase-interacting protein 4 OS=Homo sapiens GN=SPAG9                                   |            |        |
| O60271;O60271-2;O6027 | 1 JIP4_HUMAN C-Jun-amino-terminal kinase-interacting protein 4 OS=Homo sapiens GN=SPAG9 PE=1 SV=4;>sp O60271-2 JIP4_HUMA             | 1.45E-83   |        |
| O60281                | ZN292_HUMAN Zinc finger protein 292 OS=Homo sapiens GN=ZNF292 PE=1 SV=3                                                              |            | 29.82  |
| O60281-2              | ZN292_HUMAN Isoform 2 of Zinc finger protein 292 OS=Homo sapiens GN=ZNF292                                                           |            | 29.82  |
| O60281;O60281-2       | ZN292_HUMAN Zinc finger protein 292 OS=Homo sapiens GN=ZNF292 PE=1 SV=3;>sp O60281-2 ZN292_HUMAN Isoform 2 of Zinc f                 | 1.94E-08   |        |
| O60282                | KIF5C_HUMAN Kinesin heavy chain isoform 5C OS=Homo sapiens GN=KIF5C PE=1 SV=1                                                        |            |        |
| O60282-2              | KIF5C_HUMAN Isoform 2 of Kinesin heavy chain isoform 5C OS=Homo sapiens GN=KIF5C                                                     |            |        |
| O60282;O60282-2       | KIF5C_HUMAN Kinesin heavy chain isoform 5C OS=Homo sapiens GN=KIF5C PE=1 SV=1;>sp O60282-2 KIF5C_HUMAN Isoform 2 of                  | 4.08E-143  |        |
| O60287                | NPA1P_HUMAN Nucleolar pre-ribosomal-associated protein 1 OS=Homo sapiens GN=URB1 PE=1 SV=4                                           |            | 87.16  |
| O60290                | ZN862_HUMAN Zinc finger protein 862 OS=Homo sapiens GN=ZNF862 PE=2 SV=2                                                              |            | 23.48  |
| O60290-2              | ZN862_HUMAN Isoform 2 of Zinc finger protein 862 OS=Homo sapiens GN=ZNF862                                                           |            | 19.1   |
| O60293                | ZC3H1_HUMAN Zinc finger C3H1 domain-containing protein OS=Homo sapiens GN=ZFC3H1 PE=1 SV=3                                           |            | 33.44  |
| O60293-2              | ZC3H1_HUMAN Isoform 2 of Zinc finger C3H1 domain-containing protein OS=Homo sapiens GN=ZFC3H1                                        |            | 33.44  |
| O60299                | PRIP1_HUMAN ProSAP-interacting protein 1 OS=Homo sapiens GN=PROSAPIP1 PE=2 SV=1                                                      |            |        |
| O60299-2              | PRIP1_HUMAN Isoform 2 of ProSAP-interacting protein 1 OS=Homo sapiens GN=PROSAPIP1                                                   |            |        |
| O60306                | AQR_HUMAN Intron-binding protein aquarius OS=Homo sapiens GN=AQR PE=1 SV=4                                                           |            |        |
| O60308                | CE104_HUMAN Centrosomal protein of 104 kDa OS=Homo sapiens GN=CEP104 PE=1 SV=1                                                       |            |        |
| O60313                | OPA1_HUMAN Dynamin-like 120 kDa protein, mitochondrial OS=Homo sapiens GN=OPA1 PE=1 SV=3                                             |            | 29.56  |
| O60313-2              | OPA1_HUMAN Isoform 2 of Dynamin-like 120 kDa protein, mitochondrial OS=Homo sapiens GN=OPA1                                          |            | 29.56  |
| O60313-2;D3DNW4;O603  | 2 OPA1_HUMAN Isoform 2 of Dynamin-like 120 kDa protein, mitochondrial OS=Homo sapiens GN=OPA1;>tr D3DNW4 D3DNW4_HUM                  | 2.96E-50   |        |
| O60315                | ZEB2_HUMAN Zinc finger E-box-binding homeobox 2 OS=Homo sapiens GN=ZEB2 PE=1 SV=1                                                    |            |        |
| O60331                | PI51C_HUMAN Phosphatidylinositol-4-phosphate 5-kinase type-1 gamma OS=Homo sapiens GN=PIP5K1C PE=1 SV=2                              |            | 4.96   |
| O60333-4;O60333;O6033 | 4 KIF1B_HUMAN Isoform 4 of Kinesin-like protein KIF1B OS=Homo sapiens GN=KIF1B;>sp O60333 KIF1B_HUMAN Kinesin-like protei            | 1.37E-05   |        |
| O60341                | KDM1A_HUMAN Lysine-specific histone demethylase 1A OS=Homo sapiens GN=KDM1A PE=1 SV=2                                                |            |        |
| O60341-2              | KDM1A_HUMAN Isoform 2 of Lysine-specific histone demethylase 1A OS=Homo sapiens GN=KDM1A                                             |            |        |
| O60341-2;O60341       | 2 KDM1A_HUMAN Isoform 2 of Lysine-specific histone demethylase 1A OS=Homo sapiens GN=KDM1A;>sp O60341 KDM1A_HUMAN L                  | 1.49E-49   |        |
| O60343;O60343-3;O6034 | TBCD4_HUMAN TBC1 domain family member 4 OS=Homo sapiens GN=TBC1D4 PE=1 SV=2;>sp O60343-3 TBCD4_HUMAN Isoform 3                       | 3.25E-07   |        |
| O60344                | ECE2_HUMAN Endothelin-converting enzyme 2 OS=Homo sapiens GN=ECE2 PE=1 SV=4                                                          |            | 3.71   |
| O60344-2              | ECE2_HUMAN Isoform B of Endothelin-converting enzyme 2 OS=Homo sapiens GN=ECE2                                                       |            | 3.71   |
| O60344-3              | ECE2_HUMAN Isoform C of Endothelin-converting enzyme 2 OS=Homo sapiens GN=ECE2                                                       |            | 3.71   |
| O60344-5              | ECE2_HUMAN Isoform 2C of Endothelin-converting enzyme 2 OS=Homo sapiens GN=ECE2                                                      |            | 20.65  |
| O60361                | NDK8_HUMAN Putative nucleoside diphosphate kinase OS=Homo sapiens GN=NME2P1 PE=5 SV=1                                                |            | 599.59 |
| O60427                | FADS1_HUMAN Fatty acid desaturase 1 OS=Homo sapiens GN=FADS1 PE=1 SV=1                                                               | 5.17E-07   |        |
| O60437                | PEPL_HUMAN Periplakin OS=Homo sapiens GN=PPL PE=1 SV=4                                                                               |            |        |
| O60443                | DFNA5_HUMAN Non-syndromic hearing impairment protein 5 OS=Homo sapiens GN=DFNA5 PE=1 SV=2                                            | 2.42E-09   |        |

|                       |                                                                                                                           |            |          |
|-----------------------|---------------------------------------------------------------------------------------------------------------------------|------------|----------|
| O60447                | EVI5_HUMAN Ecotropic viral integration site 5 protein homolog OS=Homo sapiens GN=EVI5 PE=1 SV=3                           |            |          |
| O60449                | LY75_HUMAN Lymphocyte antigen 75 OS=Homo sapiens GN=LY75 PE=1 SV=3                                                        |            |          |
| O60449-2              | LY75_HUMAN Isoform 2 of Lymphocyte antigen 75 OS=Homo sapiens GN=LY75                                                     |            |          |
| O60449-3              | LY75_HUMAN Isoform 3 of Lymphocyte antigen 75 OS=Homo sapiens GN=LY75                                                     |            |          |
| O60469                | DSCAM_HUMAN Down syndrome cell adhesion molecule OS=Homo sapiens GN=DSCAM PE=1 SV=2                                       |            |          |
| O60469-2              | DSCAM_HUMAN Isoform Short of Down syndrome cell adhesion molecule OS=Homo sapiens GN=DSCAM                                |            |          |
| O60481                | ZIC3_HUMAN Zinc finger protein ZIC 3 OS=Homo sapiens GN=ZIC3 PE=1 SV=1                                                    |            | 32.53    |
| O60486                | PLXC1_HUMAN Plexin-C1 OS=Homo sapiens GN=PLXNC1 PE=1 SV=1                                                                 |            | 48.06    |
| O60488                | ACSL4_HUMAN Long-chain-fatty-acid--CoA ligase 4 OS=Homo sapiens GN=ACSL4 PE=1 SV=2                                        |            | 392.68   |
| O60488-2              | ACSL4_HUMAN Isoform Short of Long-chain-fatty-acid--CoA ligase 4 OS=Homo sapiens GN=ACSL4                                 |            | 392.68   |
| O60488;O60488-2       | ACSL4_HUMAN Long-chain-fatty-acid--CoA ligase 4 OS=Homo sapiens GN=ACSL4 PE=1 SV=2;>sp O60488-2 ACSL4_HUMAN Isoform       | 4.11E-45   |          |
| O60493                | SNX3_HUMAN Sorting nexin-3 OS=Homo sapiens GN=SNX3 PE=1 SV=3                                                              |            | 191.34   |
| O60493-2              | SNX3_HUMAN Isoform 2 of Sorting nexin-3 OS=Homo sapiens GN=SNX3                                                           |            | 86.75    |
| O60493-3              | SNX3_HUMAN Isoform 3 of Sorting nexin-3 OS=Homo sapiens GN=SNX3                                                           |            | 123.07   |
| O60493-4              | SNX3_HUMAN Isoform 4 of Sorting nexin-3 OS=Homo sapiens GN=SNX3                                                           |            | 116.8    |
| O60493;O60493-4;O6049 | SNX3_HUMAN Sorting nexin-3 OS=Homo sapiens GN=SNX3 PE=1 SV=3;>sp O60493-4 SNX3_HUMAN Isoform 4 of Sorting nexin-3 O       | 8.56E-16   |          |
| O60494                | CUBN_HUMAN Cubilin OS=Homo sapiens GN=CUBN PE=1 SV=5                                                                      |            | 31.25    |
| O60496                | DOK2_HUMAN Docking protein 2 OS=Homo sapiens GN=DOK2 PE=1 SV=2                                                            | 6.03E-05   |          |
| O60499                | STX10_HUMAN Syntaxin-10 OS=Homo sapiens GN=STX10 PE=1 SV=1                                                                |            | 77.29    |
| O60499-2              | STX10_HUMAN Isoform 2 of Syntaxin-10 OS=Homo sapiens GN=STX10                                                             |            | 67.87    |
| O60499;O60499-2       | STX10_HUMAN Syntaxin-10 OS=Homo sapiens GN=STX10 PE=1 SV=1;>sp O60499-2 STX10_HUMAN Isoform 2 of Syntaxin-10 OS=I         | 0.00019025 |          |
| O60502;O60502-2       | NCOAT_HUMAN Bifunctional protein NCOAT OS=Homo sapiens GN=MGEA5 PE=1 SV=2;>sp O60502-2 NCOAT_HUMAN Isoform 2 of B         | 4.25E-33   |          |
| O60506                | HNRPQ_HUMAN Heterogeneous nuclear ribonucleoprotein Q OS=Homo sapiens GN=SYNCRIP PE=1 SV=2                                |            | 981.04   |
| O60506-2              | HNRPQ_HUMAN Isoform 2 of Heterogeneous nuclear ribonucleoprotein Q OS=Homo sapiens GN=SYNCRIP                             |            | 981.04   |
| O60506-3              | HNRPQ_HUMAN Isoform 3 of Heterogeneous nuclear ribonucleoprotein Q OS=Homo sapiens GN=SYNCRIP                             |            | 1016.23  |
| O60506-3;O60506-4;O60 | 5 HNRPQ_HUMAN Isoform 3 of Heterogeneous nuclear ribonucleoprotein Q OS=Homo sapiens GN=SYNCRIP;>sp O60506-4 HNRPQ_H      | 0          |          |
| O60506-4              | HNRPQ_HUMAN Isoform 4 of Heterogeneous nuclear ribonucleoprotein Q OS=Homo sapiens GN=SYNCRIP                             |            | 1016.23  |
| O60506-5              | HNRPQ_HUMAN Isoform 5 of Heterogeneous nuclear ribonucleoprotein Q OS=Homo sapiens GN=SYNCRIP                             |            | 713.07   |
| O60506;O60506-2       | HNRPQ_HUMAN Heterogeneous nuclear ribonucleoprotein Q OS=Homo sapiens GN=SYNCRIP PE=1 SV=2;>sp O60506-2 HNRPQ_HUM         | 0          |          |
| O60508                | PRP17_HUMAN Pre-processing factor 17 OS=Homo sapiens GN=CDC40 PE=1 SV=1                                                   |            |          |
| O60518                | RNBP6_HUMAN Ran-binding protein 6 OS=Homo sapiens GN=RANBP6 PE=1 SV=2                                                     |            | 88.23    |
| O60524                | NEMF_HUMAN Nuclear export mediator factor NEMF OS=Homo sapiens GN=NEMF PE=1 SV=4                                          |            |          |
| O60524-2              | NEMF_HUMAN Isoform 2 of Nuclear export mediator factor NEMF OS=Homo sapiens GN=NEMF                                       |            |          |
| O60524-3              | NEMF_HUMAN Isoform 3 of Nuclear export mediator factor NEMF OS=Homo sapiens GN=NEMF                                       |            |          |
| O60524-4              | NEMF_HUMAN Isoform 4 of Nuclear export mediator factor NEMF OS=Homo sapiens GN=NEMF                                       |            |          |
| O60524-5              | NEMF_HUMAN Isoform 5 of Nuclear export mediator factor NEMF OS=Homo sapiens GN=NEMF                                       |            |          |
| O60524;O60524-3;O6052 | 4 NEMF_HUMAN Nuclear export mediator factor NEMF OS=Homo sapiens GN=NEMF PE=1 SV=4;>sp O60524-3 NEMF_HUMAN Isoform :      | 1.09E-14   |          |
| O60547                | GMDS_HUMAN GDP-mannose 4,6 dehydratase OS=Homo sapiens GN=GMDS PE=1 SV=1                                                  |            | 2.97E-17 |
| O60551                | NMT2_HUMAN Glycylpeptide N-tetradecanoyltransferase 2 OS=Homo sapiens GN=NMT2 PE=1 SV=1                                   |            | 164.8    |
| O60563                | CCNT1_HUMAN Cyclin-T1 OS=Homo sapiens GN=CCNT1 PE=1 SV=1                                                                  |            | 4.94E-10 |
| O60566                | BUB1B_HUMAN Mitotic checkpoint serine/threonine-protein kinase BUB1 beta OS=Homo sapiens GN=BUB1B PE=1 SV=3               |            |          |
| O60566-2              | BUB1B_HUMAN Isoform 2 of Mitotic checkpoint serine/threonine-protein kinase BUB1 beta OS=Homo sapiens GN=BUB1B            |            |          |
| O60566-3              | BUB1B_HUMAN Isoform 3 of Mitotic checkpoint serine/threonine-protein kinase BUB1 beta OS=Homo sapiens GN=BUB1B            |            |          |
| O60566-3;O60566;O6056 | 6 BUB1B_HUMAN Isoform 3 of Mitotic checkpoint serine/threonine-protein kinase BUB1 beta OS=Homo sapiens GN=BUB1B;>sp O605 | 1.40E-09   |          |
| O60568                | PLOD3_HUMAN Procollagen-lysine,2-oxoglutarate 5-dioxygenase 3 OS=Homo sapiens GN=PLOD3 PE=1 SV=1                          |            | 555.24   |
| O60573                | IF4E2_HUMAN Eukaryotic translation initiation factor 4E type 2 OS=Homo sapiens GN=EIF4E2 PE=1 SV=1                        |            | 58.98    |
| O60610                | DIAP1_HUMAN Protein diaphanous homolog 1 OS=Homo sapiens GN=DIAPH1 PE=1 SV=2                                              |            |          |
| O60610-2              | DIAP1_HUMAN Isoform 2 of Protein diaphanous homolog 1 OS=Homo sapiens GN=DIAPH1                                           |            |          |
| O60610;O60610-2       | DIAP1_HUMAN Protein diaphanous homolog 1 OS=Homo sapiens GN=DIAPH1 PE=1 SV=2;>sp O60610-2 DIAP1_HUMAN Isoform 2 of        | 0          |          |
| O60613                | SEP15_HUMAN 15 kDa selenoprotein OS=Homo sapiens GN=SEP15 PE=1 SV=3                                                       |            | 122.67   |
| O60641                | AP180_HUMAN Clathrin coat assembly protein AP180 OS=Homo sapiens GN=SNAP91 PE=1 SV=2                                      |            | 85.45    |
| O60641-2              | AP180_HUMAN Isoform 2 of Clathrin coat assembly protein AP180 OS=Homo sapiens GN=SNAP91                                   |            | 0.75     |
| O60641-3              | AP180_HUMAN Isoform 3 of Clathrin coat assembly protein AP180 OS=Homo sapiens GN=SNAP91                                   |            | 85.45    |
| O60645                | EXOC3_HUMAN Exocyst complex component 3 OS=Homo sapiens GN=EXOC3 PE=1 SV=2                                                |            | 46.93    |
| O60645-2              | EXOC3_HUMAN Isoform 2 of Exocyst complex component 3 OS=Homo sapiens GN=EXOC3                                             |            | 46.93    |
| O60645;O60645-2       | EXOC3_HUMAN Exocyst complex component 3 OS=Homo sapiens GN=EXOC3 PE=1 SV=2;>sp O60645-2 EXOC3_HUMAN Isoform 2 o           | 5.13E-09   |          |
| O60664                | PLIN3_HUMAN Perilipin-3 OS=Homo sapiens GN=PLIN3 PE=1 SV=3                                                                |            | 144.63   |
| O60664-2              | PLIN3_HUMAN Isoform A of Perilipin-3 OS=Homo sapiens GN=PLIN3                                                             |            | 18.78    |
| O60664-3              | PLIN3_HUMAN Isoform 3 of Perilipin-3 OS=Homo sapiens GN=PLIN3                                                             |            | 144.63   |
| O60664;O60664-3       | PLIN3_HUMAN Perilipin-3 OS=Homo sapiens GN=PLIN3 PE=1 SV=3;>sp O60664-3 PLIN3_HUMAN Isoform 3 of Perilipin-3 OS=Homo      | 0          |          |
| O60667                | FAIM3_HUMAN Fas apoptotic inhibitory molecule 3 OS=Homo sapiens GN=FAIM3 PE=2 SV=1                                        |            |          |

|                            |                                                                                                                             |           |        |
|----------------------------|-----------------------------------------------------------------------------------------------------------------------------|-----------|--------|
| O60669                     | MOT2_HUMAN Monocarboxylate transporter 2 OS=Homo sapiens GN=SLC16A7 PE=2 SV=2                                               |           |        |
| O60675                     | MAFK_HUMAN Transcription factor MafK OS=Homo sapiens GN=MAFK PE=1 SV=1                                                      |           |        |
| O60684                     | IMA7_HUMAN Importin subunit alpha-7 OS=Homo sapiens GN=KPNA6 PE=1 SV=1                                                      |           |        |
| O60701                     | UGDH_HUMAN UDP-glucose 6-dehydrogenase OS=Homo sapiens GN=UGDH PE=1 SV=1                                                    |           |        |
| O60711                     | LPXN_HUMAN Leupaxin OS=Homo sapiens GN=LPXN PE=1 SV=1                                                                       | 1.08E-10  |        |
| O60716                     | CTND1_HUMAN Catenin delta-1 OS=Homo sapiens GN=CTNND1 PE=1 SV=1                                                             |           |        |
| O60716-10                  | CTND1_HUMAN Isoform 2AB of Catenin delta-1 OS=Homo sapiens GN=CTNND1                                                        |           |        |
| O60716-11                  | CTND1_HUMAN Isoform 2AC of Catenin delta-1 OS=Homo sapiens GN=CTNND1                                                        |           |        |
| O60716-12                  | CTND1_HUMAN Isoform 2BC of Catenin delta-1 OS=Homo sapiens GN=CTNND1                                                        |           |        |
| O60716-13                  | CTND1_HUMAN Isoform 2A of Catenin delta-1 OS=Homo sapiens GN=CTNND1                                                         |           |        |
| O60716-14                  | CTND1_HUMAN Isoform 2B of Catenin delta-1 OS=Homo sapiens GN=CTNND1                                                         |           |        |
| O60716-15                  | CTND1_HUMAN Isoform 2C of Catenin delta-1 OS=Homo sapiens GN=CTNND1                                                         |           |        |
| O60716-16                  | CTND1_HUMAN Isoform 2 of Catenin delta-1 OS=Homo sapiens GN=CTNND1                                                          |           |        |
| O60716-17                  | CTND1_HUMAN Isoform 3ABC of Catenin delta-1 OS=Homo sapiens GN=CTNND1                                                       |           |        |
| O60716-18                  | CTND1_HUMAN Isoform 3AB of Catenin delta-1 OS=Homo sapiens GN=CTNND1                                                        |           |        |
| O60716-19                  | CTND1_HUMAN Isoform 3AC of Catenin delta-1 OS=Homo sapiens GN=CTNND1                                                        |           |        |
| O60716-2                   | CTND1_HUMAN Isoform 1AB of Catenin delta-1 OS=Homo sapiens GN=CTNND1                                                        |           |        |
| O60716-20                  | CTND1_HUMAN Isoform 3BC of Catenin delta-1 OS=Homo sapiens GN=CTNND1                                                        |           |        |
| O60716-21                  | CTND1_HUMAN Isoform 3A of Catenin delta-1 OS=Homo sapiens GN=CTNND1                                                         |           |        |
| O60716-22                  | CTND1_HUMAN Isoform 3B of Catenin delta-1 OS=Homo sapiens GN=CTNND1                                                         |           |        |
| O60716-23                  | CTND1_HUMAN Isoform 3C of Catenin delta-1 OS=Homo sapiens GN=CTNND1                                                         |           |        |
| O60716-24                  | CTND1_HUMAN Isoform 3 of Catenin delta-1 OS=Homo sapiens GN=CTNND1                                                          |           |        |
| O60716-25                  | CTND1_HUMAN Isoform 4ABC of Catenin delta-1 OS=Homo sapiens GN=CTNND1                                                       |           |        |
| O60716-26                  | CTND1_HUMAN Isoform 4AB of Catenin delta-1 OS=Homo sapiens GN=CTNND1                                                        |           |        |
| O60716-27                  | CTND1_HUMAN Isoform 4AC of Catenin delta-1 OS=Homo sapiens GN=CTNND1                                                        |           |        |
| O60716-28                  | CTND1_HUMAN Isoform 4BC of Catenin delta-1 OS=Homo sapiens GN=CTNND1                                                        |           |        |
| O60716-29                  | CTND1_HUMAN Isoform 4A of Catenin delta-1 OS=Homo sapiens GN=CTNND1                                                         |           |        |
| O60716-3                   | CTND1_HUMAN Isoform 1AC of Catenin delta-1 OS=Homo sapiens GN=CTNND1                                                        |           |        |
| O60716-3;O60716-5;O60716-6 | CTND1_HUMAN Isoform 1AC of Catenin delta-1 OS=Homo sapiens GN=CTNND1;>sp O60716-5 CTND1_HUMAN Isoform 1A of Catei           | 2.00E-108 |        |
| O60716-30                  | CTND1_HUMAN Isoform 4B of Catenin delta-1 OS=Homo sapiens GN=CTNND1                                                         |           |        |
| O60716-31                  | CTND1_HUMAN Isoform 4C of Catenin delta-1 OS=Homo sapiens GN=CTNND1                                                         |           |        |
| O60716-32                  | CTND1_HUMAN Isoform 4 of Catenin delta-1 OS=Homo sapiens GN=CTNND1                                                          |           |        |
| O60716-4                   | CTND1_HUMAN Isoform 1BC of Catenin delta-1 OS=Homo sapiens GN=CTNND1                                                        |           |        |
| O60716-5                   | CTND1_HUMAN Isoform 1A of Catenin delta-1 OS=Homo sapiens GN=CTNND1                                                         |           |        |
| O60716-6                   | CTND1_HUMAN Isoform 1B of Catenin delta-1 OS=Homo sapiens GN=CTNND1                                                         |           |        |
| O60716-7                   | CTND1_HUMAN Isoform 1C of Catenin delta-1 OS=Homo sapiens GN=CTNND1                                                         |           |        |
| O60716-8                   | CTND1_HUMAN Isoform 1 of Catenin delta-1 OS=Homo sapiens GN=CTNND1                                                          |           |        |
| O60716-9                   | CTND1_HUMAN Isoform 2ABC of Catenin delta-1 OS=Homo sapiens GN=CTNND1                                                       |           |        |
| O60716;O60716-2;C9JKX      | CTND1_HUMAN Catenin delta-1 OS=Homo sapiens GN=CTNND1 PE=1 SV=1;>sp O60716-2 CTND1_HUMAN Isoform 1AB of Catenin c           | 1.51E-15  |        |
| O60739                     | EIF1B_HUMAN Eukaryotic translation initiation factor 1b OS=Homo sapiens GN=EIF1B PE=1 SV=2                                  |           | 135.44 |
| O60741                     | HCN1_HUMAN Potassium/sodium hyperpolarization-activated cyclic nucleotide-gated channel 1 OS=Homo sapiens GN=HCN1 PE=2 SV=3 |           |        |
| O60749                     | SNX2_HUMAN Sorting nexin-2 OS=Homo sapiens GN=SNX2 PE=1 SV=2                                                                | 1.31E-16  |        |
| O60762                     | DPM1_HUMAN Dolichol-phosphate mannosyltransferase OS=Homo sapiens GN=DPM1 PE=1 SV=1                                         |           | 281.4  |
| O60763                     | USO1_HUMAN General vesicular transport factor p115 OS=Homo sapiens GN=USO1 PE=1 SV=2                                        |           | 77.57  |
| O60763-2                   | USO1_HUMAN Isoform 2 of General vesicular transport factor p115 OS=Homo sapiens GN=USO1                                     |           | 77.57  |
| O60763-2;O60763            | 2 USO1_HUMAN Isoform 2 of General vesicular transport factor p115 OS=Homo sapiens GN=USO1;>sp O60763 USO1_HUMAN Gener       | 3.60E-133 |        |
| O60763;O60763-2            | USO1_HUMAN General vesicular transport factor p115 OS=Homo sapiens GN=USO1 PE=1 SV=2;>sp O60763-2 USO1_HUMAN Isoforr        | 1.54E-46  |        |
| O60783                     | RT14_HUMAN 28S ribosomal protein S14, mitochondrial OS=Homo sapiens GN=MRPS14 PE=1 SV=1                                     |           | 113.99 |
| O60784-2;O60784;O6078      | 2 TOM1_HUMAN Isoform 2 of Target of Myb protein 1 OS=Homo sapiens GN=TOM1;>sp O60784 TOM1_HUMAN Target of Myb protein       | 1.99E-07  |        |
| O60812                     | HNRCL_HUMAN Heterogeneous nuclear ribonucleoprotein C-like 1 OS=Homo sapiens GN=HNRNPCL1 PE=1 SV=1                          |           | 277.96 |
| O60814                     | H2B1K_HUMAN Histone H2B type 1-K OS=Homo sapiens GN=HIST1H2BK PE=1 SV=3                                                     |           | 705.5  |
| O60825;B0FLL2;O60825-2     | F262_HUMAN 6-phosphofructo-2-kinase/fructose-2,6-biphosphatase 2 OS=Homo sapiens GN=PFKFB2 PE=1 SV=2;>tr B0FLL2 B0FLL2      | 5.14E-12  |        |
| O60826                     | CCD22_HUMAN Coiled-coil domain-containing protein 22 OS=Homo sapiens GN=CCDC22 PE=1 SV=1                                    | 7.99E-10  |        |
| O60828                     | PQBP1_HUMAN Polyglutamine-binding protein 1 OS=Homo sapiens GN=PQBP1 PE=1 SV=1                                              |           | 73.59  |
| O60828-10                  | PQBP1_HUMAN Isoform 10 of Polyglutamine-binding protein 1 OS=Homo sapiens GN=PQBP1                                          |           | 28.66  |
| O60828-2                   | PQBP1_HUMAN Isoform 2 of Polyglutamine-binding protein 1 OS=Homo sapiens GN=PQBP1                                           |           | 73.59  |
| O60828-3                   | PQBP1_HUMAN Isoform 3 of Polyglutamine-binding protein 1 OS=Homo sapiens GN=PQBP1                                           |           | 73.59  |
| O60828-4                   | PQBP1_HUMAN Isoform 4 of Polyglutamine-binding protein 1 OS=Homo sapiens GN=PQBP1                                           |           | 28.66  |
| O60828-5                   | PQBP1_HUMAN Isoform 5 of Polyglutamine-binding protein 1 OS=Homo sapiens GN=PQBP1                                           |           | 73.59  |
| O60828-6                   | PQBP1_HUMAN Isoform 6 of Polyglutamine-binding protein 1 OS=Homo sapiens GN=PQBP1                                           |           | 28.66  |
| O60828-7                   | PQBP1_HUMAN Isoform 7 of Polyglutamine-binding protein 1 OS=Homo sapiens GN=PQBP1                                           |           | 32.03  |

|                       |                                                                                                                         |            |        |
|-----------------------|-------------------------------------------------------------------------------------------------------------------------|------------|--------|
| O60828-8              | PQBP1_HUMAN Isoform 8 of Polyglutamine-binding protein 1 OS=Homo sapiens GN=PQBP1                                       |            | 28.66  |
| O60828-9              | PQBP1_HUMAN Isoform 9 of Polyglutamine-binding protein 1 OS=Homo sapiens GN=PQBP1                                       |            | 28.66  |
| O60828;O60828-2;O6082 | PQBP1_HUMAN Polyglutamine-binding protein 1 OS=Homo sapiens GN=PQBP1 PE=1 SV=1;>sp O60828-2 PQBP1_HUMAN Isoform 2 of    | 1.13E-06   |        |
| O60830                | TI17B_HUMAN Mitochondrial import inner membrane translocase subunit Tim17-B OS=Homo sapiens GN=TIMM17B PE=1 SV=1        | 1.71E-15   |        |
| O60831                | PRAF2_HUMAN PRA1 family protein 2 OS=Homo sapiens GN=PRAF2 PE=1 SV=1                                                    |            | 112.56 |
| O60832                | DKC1_HUMAN H/ACA ribonucleoprotein complex subunit 4 OS=Homo sapiens GN=DKC1 PE=1 SV=3                                  |            | 401.32 |
| O60840                | CAC1F_HUMAN Voltage-dependent L-type calcium channel subunit alpha-1F OS=Homo sapiens GN=CACNA1F PE=1 SV=2              |            |        |
| O60840-2              | CAC1F_HUMAN Isoform 2 of Voltage-dependent L-type calcium channel subunit alpha-1F OS=Homo sapiens GN=CACNA1F           |            |        |
| O60841                | IF2P_HUMAN Eukaryotic translation initiation factor 5B OS=Homo sapiens GN=EIF5B PE=1 SV=4                               |            | 257.27 |
| O60869                | EDF1_HUMAN Endothelial differentiation-related factor 1 OS=Homo sapiens GN=EDF1 PE=1 SV=1                               |            | 292.23 |
| O60869-2              | EDF1_HUMAN Isoform 2 of Endothelial differentiation-related factor 1 OS=Homo sapiens GN=EDF1                            |            | 275.94 |
| O60869;O60869-2       | EDF1_HUMAN Endothelial differentiation-related factor 1 OS=Homo sapiens GN=EDF1 PE=1 SV=1;>sp O60869-2 EDF1_HUMAN Isofo | 1.67E-73   |        |
| O60870                | KIN17_HUMAN DNA/RNA-binding protein KIN17 OS=Homo sapiens GN=KIN PE=1 SV=2                                              |            |        |
| O60879-2;O60879;O6087 | 2 DIAP2_HUMAN Isoform 2 of Protein diaphanous homolog 2 OS=Homo sapiens GN=DIAPH2;>sp O60879 DIAP2_HUMAN Protein dia    | 1.41E-17   |        |
| O60880;O60880-4       | SH21A_HUMAN SH2 domain-containing protein 1A OS=Homo sapiens GN=SH2D1A PE=1 SV=1;>sp O60880-4 SH21A_HUMAN Isoform       | 0.00021694 |        |
| O60884                | DNJA2_HUMAN DnaJ homolog subfamily A member 2 OS=Homo sapiens GN=DNJA2 PE=1 SV=1                                        | 4.25E-80   |        |
| O60885                | BRD4_HUMAN Bromodomain-containing protein 4 OS=Homo sapiens GN=BRD4 PE=1 SV=2                                           |            | 84.52  |
| O60885-2              | BRD4_HUMAN Isoform 2 of Bromodomain-containing protein 4 OS=Homo sapiens GN=BRD4                                        |            | 71.23  |
| O60885;Q15059;O60885- | BRD4_HUMAN Bromodomain-containing protein 4 OS=Homo sapiens GN=BRD4 PE=1 SV=2;>sp Q15059 BRD3_HUMAN Bromodomain         | 4.22E-09   |        |
| O60888                | CUTA_HUMAN Protein CutA OS=Homo sapiens GN=CUTA PE=1 SV=2                                                               |            | 125.11 |
| O60888-2              | CUTA_HUMAN Isoform A of Protein CutA OS=Homo sapiens GN=CUTA                                                            |            | 125.11 |
| O60888-2;O60888;O6088 | 2 CUTA_HUMAN Isoform A of Protein CutA OS=Homo sapiens GN=CUTA;>sp O60888 CUTA_HUMAN Protein CutA OS=Homo sapiens C     | 1.16E-25   |        |
| O60888-3              | CUTA_HUMAN Isoform C of Protein CutA OS=Homo sapiens GN=CUTA                                                            |            | 125.11 |
| O60890                | OPHN1_HUMAN Oligophrenin-1 OS=Homo sapiens GN=OPHN1 PE=2 SV=1                                                           |            | 35.36  |
| O60907                | TBL1X_HUMAN F-box-like/WD repeat-containing protein TBL1X OS=Homo sapiens GN=TBL1X PE=1 SV=3                            |            | 22.51  |
| O60907-2              | TBL1X_HUMAN Isoform 2 of F-box-like/WD repeat-containing protein TBL1X OS=Homo sapiens GN=TBL1X                         |            | 22.51  |
| O60925                | PFD1_HUMAN Prefoldin subunit 1 OS=Homo sapiens GN=PFDN1 PE=1 SV=2                                                       |            | 63.24  |
| O60927                | PP1RB_HUMAN Protein phosphatase 1 regulatory subunit 11 OS=Homo sapiens GN=PPP1R11 PE=1 SV=1                            | 6.75E-05   |        |
| O60934                | NBN_HUMAN Nibrin OS=Homo sapiens GN=NBN PE=1 SV=1                                                                       | 9.38E-12   |        |
| O60936;O60936-2       | NOL3_HUMAN Nucleolar protein 3 OS=Homo sapiens GN=NOL3 PE=1 SV=1;>sp O60936-2 NOL3_HUMAN Isoform 2 of Nucleolar prot    | 5.90E-10   |        |
| O60938                | KERA_HUMAN Keratocan OS=Homo sapiens GN=KERA PE=1 SV=1                                                                  |            |        |
| O60942;O60942-2;O6094 | MCE1_HUMAN mRNA-capping enzyme OS=Homo sapiens GN=RNGTT PE=1 SV=1;>sp O60942-2 MCE1_HUMAN Isoform 2 of mRNA-c           | 5.36E-09   |        |
| O71037                | ENK3_HUMAN HERV-K_19q12 provirus ancestral Env polyprotein OS=Homo sapiens PE=1 SV=2                                    |            |        |
| O75027-2;O75027       | 2 ABCB7_HUMAN Isoform 2 of ATP-binding cassette sub-family B member 7, mitochondrial OS=Homo sapiens GN=ABCB7;>sp O7502 | 4.20E-10   |        |
| O75038                | PLCH2_HUMAN 1-phosphatidylinositol-4,5-bisphosphate phosphodiesterase eta-2 OS=Homo sapiens GN=PLCH2 PE=2 SV=3          |            |        |
| O75038-3              | PLCH2_HUMAN Isoform 3 of 1-phosphatidylinositol-4,5-bisphosphate phosphodiesterase eta-2 OS=Homo sapiens GN=PLCH2       |            |        |
| O75038-4              | PLCH2_HUMAN Isoform 4 of 1-phosphatidylinositol-4,5-bisphosphate phosphodiesterase eta-2 OS=Homo sapiens GN=PLCH2       |            |        |
| O75038-5              | PLCH2_HUMAN Isoform 5 of 1-phosphatidylinositol-4,5-bisphosphate phosphodiesterase eta-2 OS=Homo sapiens GN=PLCH2       |            |        |
| O75044                | FNBP2_HUMAN SLIT-ROBO Rho GTPase-activating protein 2 OS=Homo sapiens GN=SRGAP2 PE=1 SV=2                               | 8.03E-58   |        |
| O75063                | XYLK_HUMAN Glycosaminoglycan xylosylkinase OS=Homo sapiens GN=FAM20B PE=1 SV=1                                          |            |        |
| O75069                | TMCC2_HUMAN Transmembrane and coiled-coil domains protein 2 OS=Homo sapiens GN=TMCC2 PE=1 SV=3                          |            |        |
| O75083                | WDR1_HUMAN WD repeat-containing protein 1 OS=Homo sapiens GN=WDR1 PE=1 SV=4                                             |            | 334.7  |
| O75083-3              | WDR1_HUMAN Isoform 2 of WD repeat-containing protein 1 OS=Homo sapiens GN=WDR1                                          |            | 134.37 |
| O75083;O75083-3       | WDR1_HUMAN WD repeat-containing protein 1 OS=Homo sapiens GN=WDR1 PE=1 SV=4;>sp O75083-3 WDR1_HUMAN Isoform 2 of        | 0          |        |
| O75084                | FZD7_HUMAN Frizzled-7 OS=Homo sapiens GN=FZD7 PE=1 SV=2                                                                 |            | 74.7   |
| O75116                | ROCK2_HUMAN Rho-associated protein kinase 2 OS=Homo sapiens GN=ROCK2 PE=1 SV=4                                          |            | 53.3   |
| O75122                | CLAP2_HUMAN CLIP-associating protein 2 OS=Homo sapiens GN=CLASP2 PE=1 SV=2                                              | 1.19E-87   |        |
| O75131                | CPNE3_HUMAN Copine-3 OS=Homo sapiens GN=CPNE3 PE=1 SV=1                                                                 |            | 23.37  |
| O75146                | HIP1R_HUMAN Huntingtin-interacting protein 1-related protein OS=Homo sapiens GN=HIP1R PE=1 SV=2                         |            | 261.27 |
| O75147                | OBSL1_HUMAN Obscurin-like protein 1 OS=Homo sapiens GN=OBSL1 PE=1 SV=4                                                  |            |        |
| O75147-1              | OBSL1_HUMAN Isoform 3 of Obscurin-like protein 1 OS=Homo sapiens GN=OBSL1                                               |            |        |
| O75147-2              | OBSL1_HUMAN Isoform 2 of Obscurin-like protein 1 OS=Homo sapiens GN=OBSL1                                               |            |        |
| O75150                | BRE1B_HUMAN E3 ubiquitin-protein ligase BRE1B OS=Homo sapiens GN=RNF40 PE=1 SV=4                                        |            |        |
| O75150-3              | BRE1B_HUMAN Isoform 3 of E3 ubiquitin-protein ligase BRE1B OS=Homo sapiens GN=RNF40                                     |            |        |
| O75150-4              | BRE1B_HUMAN Isoform 4 of E3 ubiquitin-protein ligase BRE1B OS=Homo sapiens GN=RNF40                                     |            |        |
| O75150;A8K6K1;O75150- | BRE1B_HUMAN E3 ubiquitin-protein ligase BRE1B OS=Homo sapiens GN=RNF40 PE=1 SV=4;>tr A8K6K1 A8K6K1_HUMAN cDNA FLJ7      | 4.40E-06   |        |
| O75151                | PHF2_HUMAN Lysine-specific demethylase PHF2 OS=Homo sapiens GN=PHF2 PE=1 SV=4                                           |            |        |
| O75152                | ZC11A_HUMAN Zinc finger CCCH domain-containing protein 11A OS=Homo sapiens GN=ZC3H11A PE=1 SV=3                         |            |        |
| O75153                | K0664_HUMAN Protein KIAA0664 OS=Homo sapiens GN=KIAA0664 PE=1 SV=2                                                      | 5.65E-29   |        |
| O75155                | CAND2_HUMAN Cullin-associated NEDD8-dissociated protein 2 OS=Homo sapiens GN=CAND2 PE=1 SV=3                            |            | 0.36   |
| O75155-2              | CAND2_HUMAN Isoform 2 of Cullin-associated NEDD8-dissociated protein 2 OS=Homo sapiens GN=CAND2                         |            | 0.36   |

|                        |                                                                                                                        |          |         |
|------------------------|------------------------------------------------------------------------------------------------------------------------|----------|---------|
| 075157;075157-2        | T22D2_HUMAN TSC22 domain family protein 2 OS=Homo sapiens GN=TSC22D2 PE=1 SV=3;>sp 075157-2 T22D2_HUMAN Isoform 2      | 2.66E-05 |         |
| 075165                 | DJC13_HUMAN DnaJ homolog subfamily C member 13 OS=Homo sapiens GN=DNAJC13 PE=1 SV=5                                    |          | 107.05  |
| 075170                 | PP6R2_HUMAN Serine/threonine-protein phosphatase 6 regulatory subunit 2 OS=Homo sapiens GN=PPP6R2 PE=1 SV=2            |          |         |
| 075170-2               | PP6R2_HUMAN Isoform 2 of Serine/threonine-protein phosphatase 6 regulatory subunit 2 OS=Homo sapiens GN=PPP6R2         |          |         |
| 075170-3               | PP6R2_HUMAN Isoform 3 of Serine/threonine-protein phosphatase 6 regulatory subunit 2 OS=Homo sapiens GN=PPP6R2         |          |         |
| 075170-4               | PP6R2_HUMAN Isoform 4 of Serine/threonine-protein phosphatase 6 regulatory subunit 2 OS=Homo sapiens GN=PPP6R2         |          |         |
| 075170-5               | PP6R2_HUMAN Isoform 5 of Serine/threonine-protein phosphatase 6 regulatory subunit 2 OS=Homo sapiens GN=PPP6R2         |          |         |
| 075170-6               | PP6R2_HUMAN Isoform 6 of Serine/threonine-protein phosphatase 6 regulatory subunit 2 OS=Homo sapiens GN=PPP6R2         |          |         |
| 075170;075170-5;07517  | PP6R2_HUMAN Serine/threonine-protein phosphatase 6 regulatory subunit 2 OS=Homo sapiens GN=PPP6R2 PE=1 SV=2;>sp 075170 | 5.59E-05 |         |
| 075175;B7Z6J7;075175-1 | CNOT3_HUMAN CCR4-NOT transcription complex subunit 3 OS=Homo sapiens GN=CNOT3 PE=1 SV=1;>tr B7Z6J7 B7Z6J7_HUMAN c      | 3.87E-09 |         |
| 075179;075179-2;B4DTP  | ANR17_HUMAN Ankyrin repeat domain-containing protein 17 OS=Homo sapiens GN=ANKRD17 PE=1 SV=3;>sp 075179-2 ANR17_HL     | 3.82E-76 |         |
| 075182;075182-2;B7Z39  | SIN3B_HUMAN Paired amphipathic helix protein Sin3b OS=Homo sapiens GN=SIN3B PE=1 SV=2;>sp 075182-2 SIN3B_HUMAN Isofo   | 5.08E-06 |         |
| 075190                 | DNJB6_HUMAN DnaJ homolog subfamily B member 6 OS=Homo sapiens GN=DNAJB6 PE=1 SV=2                                      |          | 82.28   |
| 075190-2               | DNJB6_HUMAN Isoform B of DnaJ homolog subfamily B member 6 OS=Homo sapiens GN=DNAJB6                                   |          |         |
| 075190-3               | DNJB6_HUMAN Isoform C of DnaJ homolog subfamily B member 6 OS=Homo sapiens GN=DNAJB6                                   |          | 42.9    |
| 075190;075190-3;07519  | DNJB6_HUMAN DnaJ homolog subfamily B member 6 OS=Homo sapiens GN=DNAJB6 PE=1 SV=2;>sp 075190-3 DNJB6_HUMAN Isof        | 7.21E-21 |         |
| 075208                 | COQ9_HUMAN Ubiquinone biosynthesis protein COQ9, mitochondrial OS=Homo sapiens GN=COQ9 PE=1 SV=1                       | 4.15E-07 |         |
| 075223                 | GGCT_HUMAN Gamma-glutamylcyclotransferase OS=Homo sapiens GN=GGCT PE=1 SV=1                                            | 6.44E-11 |         |
| 075251                 | NDUS7_HUMAN NADH dehydrogenase [ubiquinone] iron-sulfur protein 7, mitochondrial OS=Homo sapiens GN=NDUFS7 PE=1 SV=3   |          | 80.53   |
| 075306                 | NDUS2_HUMAN NADH dehydrogenase [ubiquinone] iron-sulfur protein 2, mitochondrial OS=Homo sapiens GN=NDUFS2 PE=1 SV=2   |          | 81.24   |
| 075312                 | ZPR1_HUMAN Zinc finger protein ZPR1 OS=Homo sapiens GN=ZNF259 PE=1 SV=1                                                | 3.12E-22 |         |
| 075317                 | UBP12_HUMAN Ubiquitin carboxyl-terminal hydrolase 12 OS=Homo sapiens GN=USP12 PE=1 SV=2                                |          |         |
| 075323                 | NIPS2_HUMAN Protein NipSnap homolog 2 OS=Homo sapiens GN=GBAS PE=1 SV=1                                                |          |         |
| 075339                 | CILP1_HUMAN Cartilage intermediate layer protein 1 OS=Homo sapiens GN=CILP PE=1 SV=4                                   | 2.18E-13 |         |
| 075340                 | PDCD6_HUMAN Programmed cell death protein 6 OS=Homo sapiens GN=PDCD6 PE=1 SV=1                                         |          | 161.77  |
| 075347                 | TBCA_HUMAN Tubulin-specific chaperone A OS=Homo sapiens GN=TBCA PE=1 SV=3                                              |          | 218.7   |
| 075348                 | VATG1_HUMAN V-type proton ATPase subunit G 1 OS=Homo sapiens GN=ATP6V1G1 PE=1 SV=3                                     |          | 86.84   |
| 075351                 | VPS4B_HUMAN Vacuolar protein sorting-associated protein 4B OS=Homo sapiens GN=VPS4B PE=1 SV=2                          | 3.71E-60 |         |
| 075352                 | MPU1_HUMAN Mannose-P-dolichol utilization defect 1 protein OS=Homo sapiens GN=MPDU1 PE=1 SV=2                          |          | 81.25   |
| 075354                 | ENTP6_HUMAN Ectonucleoside triphosphate diphosphohydrolase 6 OS=Homo sapiens GN=ENTPD6 PE=1 SV=3                       |          | 35.54   |
| 075354-2               | ENTP6_HUMAN Isoform 2 of Ectonucleoside triphosphate diphosphohydrolase 6 OS=Homo sapiens GN=ENTPD6                    |          | 35.54   |
| 075362                 | ZN217_HUMAN Zinc finger protein 217 OS=Homo sapiens GN=ZNF217 PE=1 SV=1                                                |          |         |
| 075363-2;075363        | 2 BCAS1_HUMAN Isoform 2 of Breast carcinoma-amplified sequence 1 OS=Homo sapiens GN=BCAS1;>sp 075363 BCAS1_HUMAN Br    | 0        |         |
| 075366                 | AVIL_HUMAN Advillin OS=Homo sapiens GN=AVIL PE=1 SV=3                                                                  |          |         |
| 075366-2               | AVIL_HUMAN Isoform 2 of Advillin OS=Homo sapiens GN=AVIL                                                               |          |         |
| 075367                 | H2AY_HUMAN Core histone macro-H2A.1 OS=Homo sapiens GN=H2AFY PE=1 SV=4                                                 |          | 323.46  |
| 075367-2               | H2AY_HUMAN Isoform 1 of Core histone macro-H2A.1 OS=Homo sapiens GN=H2AFY                                              |          | 323.46  |
| 075367-3               | H2AY_HUMAN Isoform 3 of Core histone macro-H2A.1 OS=Homo sapiens GN=H2AFY                                              |          | 323.46  |
| 075367;075367-3;07536  | H2AY_HUMAN Core histone macro-H2A.1 OS=Homo sapiens GN=H2AFY PE=1 SV=4;>sp 075367-3 H2AY_HUMAN Isoform 3 of Core h     | 0        |         |
| 075368                 | SH3L1_HUMAN SH3 domain-binding glutamic acid-rich-like protein OS=Homo sapiens GN=SH3BGRL PE=1 SV=1                    |          | 71.1    |
| 075369                 | FLNB_HUMAN Filamin-B OS=Homo sapiens GN=FLNB PE=1 SV=2                                                                 |          | 5627.78 |
| 075369-2               | FLNB_HUMAN Isoform 2 of Filamin-B OS=Homo sapiens GN=FLNB                                                              |          | 5627.78 |
| 075369-3               | FLNB_HUMAN Isoform 3 of Filamin-B OS=Homo sapiens GN=FLNB                                                              |          | 5381.87 |
| 075369-4               | FLNB_HUMAN Isoform 4 of Filamin-B OS=Homo sapiens GN=FLNB                                                              |          | 4463.6  |
| 075369-5               | FLNB_HUMAN Isoform 5 of Filamin-B OS=Homo sapiens GN=FLNB                                                              |          | 4463.6  |
| 075369-6               | FLNB_HUMAN Isoform 6 of Filamin-B OS=Homo sapiens GN=FLNB                                                              |          | 5381.87 |
| 075369-7               | FLNB_HUMAN Isoform 7 of Filamin-B OS=Homo sapiens GN=FLNB                                                              |          | 4902.93 |
| 075369;075369-2;07536  | FLNB_HUMAN Filamin-B OS=Homo sapiens GN=FLNB PE=1 SV=2;>sp 075369-2 FLNB_HUMAN Isoform 2 of Filamin-B OS=Homo sap      | 0        |         |
| 075376                 | NCOR1_HUMAN Nuclear receptor corepressor 1 OS=Homo sapiens GN=NCOR1 PE=1 SV=2                                          |          | 66.35   |
| 075376-2               | NCOR1_HUMAN Isoform 2 of Nuclear receptor corepressor 1 OS=Homo sapiens GN=NCOR1                                       |          | 66.35   |
| 075376;075376-2        | NCOR1_HUMAN Nuclear receptor corepressor 1 OS=Homo sapiens GN=NCOR1 PE=1 SV=2;>sp 075376-2 NCOR1_HUMAN Isoform 2       | 1.86E-08 |         |
| 075379                 | VAMP4_HUMAN Vesicle-associated membrane protein 4 OS=Homo sapiens GN=VAMP4 PE=1 SV=2                                   |          | 21.96   |
| 075379-2               | VAMP4_HUMAN Isoform 2 of Vesicle-associated membrane protein 4 OS=Homo sapiens GN=VAMP4                                |          | 21.96   |
| 075379;075379-2        | VAMP4_HUMAN Vesicle-associated membrane protein 4 OS=Homo sapiens GN=VAMP4 PE=1 SV=2;>sp 075379-2 VAMP4_HUMAN Iso      | 1.04E-09 |         |
| 075380                 | NDUS6_HUMAN NADH dehydrogenase [ubiquinone] iron-sulfur protein 6, mitochondrial OS=Homo sapiens GN=NDUFS6 PE=1 SV=1   |          | 92.52   |
| 075381                 | PEX14_HUMAN Peroxisomal membrane protein PEX14 OS=Homo sapiens GN=PEX14 PE=1 SV=1                                      |          | 38.58   |
| 075381-2               | PEX14_HUMAN Isoform 2 of Peroxisomal membrane protein PEX14 OS=Homo sapiens GN=PEX14                                   |          | 38.58   |
| 075381;075381-2        | PEX14_HUMAN Peroxisomal membrane protein PEX14 OS=Homo sapiens GN=PEX14 PE=1 SV=1;>sp 075381-2 PEX14_HUMAN Isofo       | 2.36E-15 |         |
| 075390                 | CISY_HUMAN Citrate synthase, mitochondrial OS=Homo sapiens GN=CS PE=1 SV=2                                             |          | 302.73  |
| 075391                 | SPAG7_HUMAN Sperm-associated antigen 7 OS=Homo sapiens GN=SPAG7 PE=1 SV=2                                              | 3.62E-06 |         |
| 075394                 | RM33_HUMAN 39S ribosomal protein L33, mitochondrial OS=Homo sapiens GN=MRPL33 PE=1 SV=1                                |          | 28.61   |



|                          |                                                                                                                                                                                                                           |           |        |
|--------------------------|---------------------------------------------------------------------------------------------------------------------------------------------------------------------------------------------------------------------------|-----------|--------|
| 075396                   | SC22B_HUMAN Vesicle-trafficking protein SEC22b OS=Homo sapiens GN=SEC22B PE=1 SV=4                                                                                                                                        |           | 391.75 |
| 075400                   | PR40A_HUMAN Pre-processing factor 40 homolog A OS=Homo sapiens GN=PRPF40A PE=1 SV=2                                                                                                                                       |           | 244.33 |
| 075400-2                 | PR40A_HUMAN Isoform 2 of Pre-processing factor 40 homolog A OS=Homo sapiens GN=PRPF40A                                                                                                                                    |           | 244.33 |
| 075400-3                 | PR40A_HUMAN Isoform 3 of Pre-processing factor 40 homolog A OS=Homo sapiens GN=PRPF40A                                                                                                                                    |           | 260.58 |
| 075400;075400-2;075400-3 | PR40A_HUMAN Pre-mRNA-processing factor 40 homolog A OS=Homo sapiens GN=PRPF40A PE=1 SV=2;>sp O75400-2 PR40A_HUMAN Isoform 2 of Pre-processing factor 40 homolog A OS=Homo sapiens GN=PRPF40A                              | 1.40E-200 |        |
| 075410                   | TACC1_HUMAN Transforming acidic coiled-coil-containing protein 1 OS=Homo sapiens GN=TACC1 PE=1 SV=2                                                                                                                       |           |        |
| 075410-2                 | TACC1_HUMAN Isoform 2 of Transforming acidic coiled-coil-containing protein 1 OS=Homo sapiens GN=TACC1                                                                                                                    |           |        |
| 075410-2;D3DSX6;075410-3 | TACC1_HUMAN Isoform 2 of Transforming acidic coiled-coil-containing protein 1 OS=Homo sapiens GN=TACC1;>tr D3DSX6 D3DSX6_HUMAN Isoform 2 of Transforming acidic coiled-coil-containing protein 1 OS=Homo sapiens GN=TACC1 | 4.83E-10  |        |
| 075410-3                 | TACC1_HUMAN Isoform 3 of Transforming acidic coiled-coil-containing protein 1 OS=Homo sapiens GN=TACC1                                                                                                                    |           |        |
| 075410-4                 | TACC1_HUMAN Isoform 4 of Transforming acidic coiled-coil-containing protein 1 OS=Homo sapiens GN=TACC1                                                                                                                    |           |        |
| 075410-5                 | TACC1_HUMAN Isoform 5 of Transforming acidic coiled-coil-containing protein 1 OS=Homo sapiens GN=TACC1                                                                                                                    |           |        |
| 075410-6                 | TACC1_HUMAN Isoform 6 of Transforming acidic coiled-coil-containing protein 1 OS=Homo sapiens GN=TACC1                                                                                                                    |           |        |
| 075410-7                 | TACC1_HUMAN Isoform 7 of Transforming acidic coiled-coil-containing protein 1 OS=Homo sapiens GN=TACC1                                                                                                                    |           |        |
| 075410-8                 | TACC1_HUMAN Isoform 8 of Transforming acidic coiled-coil-containing protein 1 OS=Homo sapiens GN=TACC1                                                                                                                    |           |        |
| 075414                   | NDK6_HUMAN Nucleoside diphosphate kinase 6 OS=Homo sapiens GN=NME6 PE=1 SV=3                                                                                                                                              | 9.47E-05  |        |
| 075417                   | DPOLQ_HUMAN DNA polymerase theta OS=Homo sapiens GN=POLQ PE=1 SV=2                                                                                                                                                        |           | 31.37  |
| 075417-2                 | DPOLQ_HUMAN Isoform 2 of DNA polymerase theta OS=Homo sapiens GN=POLQ                                                                                                                                                     |           | 15.4   |
| 075420                   | PERQ1_HUMAN PERQ amino acid-rich with GYF domain-containing protein 1 OS=Homo sapiens GN=GIGYF1 PE=1 SV=2                                                                                                                 |           | 1.89   |
| 075431                   | MTX2_HUMAN Metaxin-2 OS=Homo sapiens GN=MTX2 PE=1 SV=1                                                                                                                                                                    |           | 64.97  |
| 075436                   | VP26A_HUMAN Vacuolar protein sorting-associated protein 26A OS=Homo sapiens GN=VPS26A PE=1 SV=2                                                                                                                           |           | 62.85  |
| 075438                   | NDUB1_HUMAN NADH dehydrogenase [ubiquinone] 1 beta subcomplex subunit 1 OS=Homo sapiens GN=NDUFB1 PE=1 SV=1                                                                                                               |           |        |
| 075439                   | MPPB_HUMAN Mitochondrial-processing peptidase subunit beta OS=Homo sapiens GN=PMPCB PE=1 SV=2                                                                                                                             |           | 65.82  |
| 075443                   | TECTA_HUMAN Alpha-tectorin OS=Homo sapiens GN=TECTA PE=1 SV=3                                                                                                                                                             |           |        |
| 075446                   | SAP30_HUMAN Histone deacetylase complex subunit SAP30 OS=Homo sapiens GN=SAP30 PE=1 SV=1                                                                                                                                  |           |        |
| 075448                   | MED24_HUMAN Mediator of RNA polymerase II transcription subunit 24 OS=Homo sapiens GN=MED24 PE=1 SV=1                                                                                                                     |           |        |
| 075448-2                 | MED24_HUMAN Isoform 2 of Mediator of RNA polymerase II transcription subunit 24 OS=Homo sapiens GN=MED24                                                                                                                  |           |        |
| 075461                   | E2F6_HUMAN Transcription factor E2F6 OS=Homo sapiens GN=E2F6 PE=1 SV=1                                                                                                                                                    |           |        |
| 075475                   | PSIP1_HUMAN PC4 and SFRS1-interacting protein OS=Homo sapiens GN=PSIP1 PE=1 SV=1                                                                                                                                          |           | 168.44 |
| 075475-2                 | PSIP1_HUMAN Isoform 2 of PC4 and SFRS1-interacting protein OS=Homo sapiens GN=PSIP1                                                                                                                                       |           | 57.97  |
| 075475;075475-2          | PSIP1_HUMAN PC4 and SFRS1-interacting protein OS=Homo sapiens GN=PSIP1 PE=1 SV=1;>sp O75475-2 PSIP1_HUMAN Isoform 2 of PC4 and SFRS1-interacting protein OS=Homo sapiens GN=PSIP1                                         | 0         |        |
| 075477                   | ERLN1_HUMAN Erlin-1 OS=Homo sapiens GN=ERLIN1 PE=1 SV=1                                                                                                                                                                   |           | 527.37 |
| 075478                   | TAD2A_HUMAN Transcriptional adapter 2-alpha OS=Homo sapiens GN=TADA2A PE=1 SV=3                                                                                                                                           |           |        |
| 075487                   | GPC4_HUMAN Glypican-4 OS=Homo sapiens GN=GPC4 PE=1 SV=4                                                                                                                                                                   |           |        |
| 075489                   | NDUS3_HUMAN NADH dehydrogenase [ubiquinone] iron-sulfur protein 3, mitochondrial OS=Homo sapiens GN=NDUFS3 PE=1 SV=1                                                                                                      |           | 431.12 |
| 075494                   | SRS10_HUMAN Serine/arginine-rich splicing factor 10 OS=Homo sapiens GN=SRSF10 PE=1 SV=1                                                                                                                                   |           | 108.41 |
| 075494-2                 | SRS10_HUMAN Isoform 2 of Serine/arginine-rich splicing factor 10 OS=Homo sapiens GN=SRSF10                                                                                                                                |           | 108.41 |
| 075494-3                 | SRS10_HUMAN Isoform 3 of Serine/arginine-rich splicing factor 10 OS=Homo sapiens GN=SRSF10                                                                                                                                |           | 108.41 |
| 075494-4                 | SRS10_HUMAN Isoform 4 of Serine/arginine-rich splicing factor 10 OS=Homo sapiens GN=SRSF10                                                                                                                                |           | 108.41 |
| 075494;075494-2;075494-3 | SRS10_HUMAN Serine/arginine-rich splicing factor 10 OS=Homo sapiens GN=SRSF10 PE=1 SV=1;>sp O75494-2 SRS10_HUMAN Isoform 2 of Serine/arginine-rich splicing factor 10 OS=Homo sapiens GN=SRSF10                           | 6.97E-08  |        |
| 075509                   | TNR21_HUMAN Tumor necrosis factor receptor superfamily member 21 OS=Homo sapiens GN=TNFRSF21 PE=1 SV=1                                                                                                                    |           | 32.13  |
| 075521                   | ECI2_HUMAN Enoyl-CoA delta isomerase 2, mitochondrial OS=Homo sapiens GN=ECI2 PE=1 SV=4                                                                                                                                   |           | 315.77 |
| 075521-2                 | ECI2_HUMAN Isoform 2 of Enoyl-CoA delta isomerase 2, mitochondrial OS=Homo sapiens GN=ECI2                                                                                                                                |           | 311.55 |
| 075521;075521-2          | ECI2_HUMAN Enoyl-CoA delta isomerase 2, mitochondrial OS=Homo sapiens GN=ECI2 PE=1 SV=4;>sp O75521-2 ECI2_HUMAN Isoform 2 of Enoyl-CoA delta isomerase 2, mitochondrial OS=Homo sapiens GN=ECI2                           | 2.79E-48  |        |
| 075521;Q53GC8;Q53HG3     | PECI_HUMAN Peroxisomal 3,2-trans-enoyl-CoA isomerase OS=Homo sapiens GN=PECI PE=1 SV=4;>tr Q53GC8 Q53GC8_HUMAN Peroxisomal 3,2-trans-enoyl-CoA isomerase OS=Homo sapiens GN=PECI                                          | 2.30E-68  |        |
| 075525                   | KHDR3_HUMAN KH domain-containing, RNA-binding, signal transduction-associated protein 3 OS=Homo sapiens GN=KHDRBS3 PE=1 SV=1                                                                                              |           |        |
| 075525-2                 | KHDR3_HUMAN Isoform 2 of KH domain-containing, RNA-binding, signal transduction-associated protein 3 OS=Homo sapiens GN=KHDRBS3                                                                                           |           |        |
| 075526                   | HNRGT_HUMAN RNA-binding motif protein, X-linked-like-2 OS=Homo sapiens GN=RBMXL2 PE=1 SV=3                                                                                                                                |           | 94.97  |
| 075528                   | TADA3_HUMAN Transcriptional adapter 3 OS=Homo sapiens GN=TADA3 PE=1 SV=1                                                                                                                                                  |           |        |
| 075528-2                 | TADA3_HUMAN Isoform 2 of Transcriptional adapter 3 OS=Homo sapiens GN=TADA3                                                                                                                                               |           |        |
| 075530                   | EED_HUMAN Polycomb protein EED OS=Homo sapiens GN=EED PE=1 SV=2                                                                                                                                                           |           |        |
| 075530-2                 | EED_HUMAN Isoform 2 of Polycomb protein EED OS=Homo sapiens GN=EED                                                                                                                                                        |           |        |
| 075530-3                 | EED_HUMAN Isoform 3 of Polycomb protein EED OS=Homo sapiens GN=EED                                                                                                                                                        |           |        |
| 075531                   | BAF_HUMAN Barrier-to-autointegration factor OS=Homo sapiens GN=BANF1 PE=1 SV=1                                                                                                                                            |           | 386.57 |
| 075533                   | SF3B1_HUMAN Splicing factor 3B subunit 1 OS=Homo sapiens GN=SF3B1 PE=1 SV=3                                                                                                                                               |           | 718.49 |
| 075534                   | CSDE1_HUMAN Cold shock domain-containing protein E1 OS=Homo sapiens GN=CSDE1 PE=1 SV=2                                                                                                                                    |           |        |
| 075534-2                 | CSDE1_HUMAN Isoform Short of Cold shock domain-containing protein E1 OS=Homo sapiens GN=CSDE1                                                                                                                             |           |        |
| 075534;075534-2          | CSDE1_HUMAN Cold shock domain-containing protein E1 OS=Homo sapiens GN=CSDE1 PE=1 SV=2;>sp O75534-2 CSDE1_HUMAN Isoform Short of Cold shock domain-containing protein E1 OS=Homo sapiens GN=CSDE1                         | 4.27E-64  |        |
| 075569                   | PRKRA_HUMAN Interferon-inducible double stranded RNA-dependent protein kinase activator A OS=Homo sapiens GN=PRKRA PE=1 SV=1                                                                                              |           | 99.69  |
| 075569-2                 | PRKRA_HUMAN Isoform 2 of Interferon-inducible double stranded RNA-dependent protein kinase activator A OS=Homo sapiens GN=PRKRA                                                                                           |           | 99.69  |
| 075569-3                 | PRKRA_HUMAN Isoform 3 of Interferon-inducible double stranded RNA-dependent protein kinase activator A OS=Homo sapiens GN=PRKRA                                                                                           |           | 99.69  |
| 075569;075569-2;075569-3 | PRKRA_HUMAN Interferon-inducible double stranded RNA-dependent protein kinase activator A OS=Homo sapiens GN=PRKRA PE=1 SV=1                                                                                              | 2.41E-11  |        |

|                       |                                                                                                                               |            |         |
|-----------------------|-------------------------------------------------------------------------------------------------------------------------------|------------|---------|
| 075578                | ITA10_HUMAN Integrin alpha-10 OS=Homo sapiens GN=ITGA10 PE=2 SV=2                                                             |            |         |
| 075581                | LRP6_HUMAN Low-density lipoprotein receptor-related protein 6 OS=Homo sapiens GN=LRP6 PE=1 SV=2                               |            | 28.8    |
| 075586                | MED6_HUMAN Mediator of RNA polymerase II transcription subunit 6 OS=Homo sapiens GN=MED6 PE=1 SV=2                            |            |         |
| 075592                | MYCB2_HUMAN Probable E3 ubiquitin-protein ligase MYCBP2 OS=Homo sapiens GN=MYCBP2 PE=1 SV=3                                   |            | 76.79   |
| 075592-2              | MYCB2_HUMAN Isoform 2 of Probable E3 ubiquitin-protein ligase MYCBP2 OS=Homo sapiens GN=MYCBP2                                |            | 76.79   |
| 075596                | CLC3A_HUMAN C-type lectin domain family 3 member A OS=Homo sapiens GN=CLEC3A PE=1 SV=1                                        | 0.00020953 |         |
| 075607                | NPM3_HUMAN Nucleoplasmin-3 OS=Homo sapiens GN=NPM3 PE=1 SV=3                                                                  |            | 330.64  |
| 075608                | LYPA1_HUMAN Acyl-protein thioesterase 1 OS=Homo sapiens GN=LYPLA1 PE=1 SV=1                                                   |            | 86.37   |
| 075608-2              | LYPA1_HUMAN Isoform 2 of Acyl-protein thioesterase 1 OS=Homo sapiens GN=LYPLA1                                                |            | 86.37   |
| 075608;075608-2       | LYPA1_HUMAN Acyl-protein thioesterase 1 OS=Homo sapiens GN=LYPLA1 PE=1 SV=1;>sp O75608-2 LYPA1_HUMAN Isoform 2 of Acy         | 1.35E-67   |         |
| 075628                | REM1_HUMAN GTP-binding protein REM 1 OS=Homo sapiens GN=REM1 PE=1 SV=2                                                        |            |         |
| 075643                | U520_HUMAN U5 small nuclear ribonucleoprotein 200 kDa helicase OS=Homo sapiens GN=SNRNP200 PE=1 SV=2                          |            | 2604.04 |
| 075643-2              | U520_HUMAN Isoform 2 of U5 small nuclear ribonucleoprotein 200 kDa helicase OS=Homo sapiens GN=SNRNP200                       |            | 625.58  |
| 075643;A4FU77;C9JAQ9; | U520_HUMAN U5 small nuclear ribonucleoprotein 200 kDa helicase OS=Homo sapiens GN=SNRNP200 PE=1 SV=2;>tr A4FU77 A4FU7         | 1.16E-109  |         |
| 075663;075663-2       | TIPRL_HUMAN TIP41-like protein OS=Homo sapiens GN=TIPRL PE=1 SV=2;>sp O75663-2 TIPRL_HUMAN Isoform 2 of TIP41-like prot       | 5.03E-40   |         |
| 075665                | OFD1_HUMAN Oral-facial-digital syndrome 1 protein OS=Homo sapiens GN=OFD1 PE=1 SV=1                                           |            | 35.83   |
| 075665-2              | OFD1_HUMAN Isoform 2 of Oral-facial-digital syndrome 1 protein OS=Homo sapiens GN=OFD1                                        |            | 33.75   |
| 075665-3              | OFD1_HUMAN Isoform 3 of Oral-facial-digital syndrome 1 protein OS=Homo sapiens GN=OFD1                                        |            | 35.83   |
| 075676;075676-2       | KS6A4_HUMAN Ribosomal protein S6 kinase alpha-4 OS=Homo sapiens GN=RPS6KA4 PE=1 SV=1;>sp O75676-2 KS6A4_HUMAN Isof            | 4.94E-15   |         |
| 075678                | RFPL2_HUMAN Ret finger protein-like 2 OS=Homo sapiens GN=RFPL2 PE=2 SV=3                                                      |            |         |
| 075683                | SURF6_HUMAN Surfeit locus protein 6 OS=Homo sapiens GN=SURF6 PE=1 SV=3                                                        |            |         |
| 075688;075688-2;07568 | PPM1B_HUMAN Protein phosphatase 1B OS=Homo sapiens GN=PPM1B PE=1 SV=1;>sp O75688-2 PPM1B_HUMAN Isoform Beta-2 of I            | 2.52E-17   |         |
| 075691                | UTP20_HUMAN Small subunit processome component 20 homolog OS=Homo sapiens GN=UTP20 PE=1 SV=3                                  |            | 71.72   |
| 075694                | NU155_HUMAN Nuclear pore complex protein Nup155 OS=Homo sapiens GN=NUP155 PE=1 SV=1                                           |            | 32.63   |
| 075694-2              | NU155_HUMAN Isoform 2 of Nuclear pore complex protein Nup155 OS=Homo sapiens GN=NUP155                                        |            | 32.63   |
| 075694;B4DLT2;075694- | NU155_HUMAN Nuclear pore complex protein Nup155 OS=Homo sapiens GN=NUP155 PE=1 SV=1;>tr B4DLT2 B4DLT2_HUMAN cDNA              | 1.41E-81   |         |
| 075695                | XRP2_HUMAN Protein XRP2 OS=Homo sapiens GN=RP2 PE=1 SV=4                                                                      |            | 178.97  |
| 075698                | HUG1_HUMAN Putative uncharacterized protein HUG-1 OS=Homo sapiens GN=HUG1 PE=5 SV=2                                           |            |         |
| 075717                | WDHD1_HUMAN WD repeat and HMG-box DNA-binding protein 1 OS=Homo sapiens GN=WDHD1 PE=1 SV=1                                    |            | 57.49   |
| 075718                | CRTAP_HUMAN Cartilage-associated protein OS=Homo sapiens GN=CRTAP PE=1 SV=1                                                   |            | 211.53  |
| 075746                | CMC1_HUMAN Calcium-binding mitochondrial carrier protein Aralar1 OS=Homo sapiens GN=SLC25A12 PE=1 SV=2                        |            |         |
| 075747                | P3C2G_HUMAN Phosphatidylinositol-4-phosphate 3-kinase C2 domain-containing subunit gamma OS=Homo sapiens GN=PIK3C2G PE=1 SV=3 |            | 30.21   |
| 075787                | RENH2A_HUMAN Renin receptor OS=Homo sapiens GN=ATP6AP2 PE=1 SV=2                                                              |            |         |
| 075792                | RNH2A_HUMAN Ribonuclease H2 subunit A OS=Homo sapiens GN=RNASEH2A PE=1 SV=2                                                   | 8.23E-66   |         |
| 075794                | CD123_HUMAN Cell division cycle protein 123 homolog OS=Homo sapiens GN=CDC123 PE=1 SV=1                                       |            | 23.33   |
| 075815                | BCAR3_HUMAN Breast cancer anti-estrogen resistance protein 3 OS=Homo sapiens GN=BCAR3 PE=1 SV=1                               |            |         |
| 075815-2              | BCAR3_HUMAN Isoform 2 of Breast cancer anti-estrogen resistance protein 3 OS=Homo sapiens GN=BCAR3                            |            |         |
| 075817                | POP7_HUMAN Ribonuclease P protein subunit p20 OS=Homo sapiens GN=POP7 PE=1 SV=2                                               |            | 82.81   |
| 075818;075818-2       | RPP40_HUMAN Ribonuclease P protein subunit p40 OS=Homo sapiens GN=RPP40 PE=1 SV=3;>sp O75818-2 RPP40_HUMAN Isoform            | 1.34E-12   |         |
| 075821                | EIF3G_HUMAN Eukaryotic translation initiation factor 3 subunit G OS=Homo sapiens GN=EIF3G PE=1 SV=2                           |            | 223.93  |
| 075822                | EIF3J_HUMAN Eukaryotic translation initiation factor 3 subunit J OS=Homo sapiens GN=EIF3J PE=1 SV=2                           |            | 184.93  |
| 075828                | CBR3_HUMAN Carbonyl reductase [NADPH] 3 OS=Homo sapiens GN=CBR3 PE=1 SV=3                                                     | 7.45E-100  |         |
| 075832                | PSD10_HUMAN 26S proteasome non-ATPase regulatory subunit 10 OS=Homo sapiens GN=PSMD10 PE=1 SV=1                               | 5.53E-36   |         |
| 075843                | AP1G2_HUMAN AP-1 complex subunit gamma-like 2 OS=Homo sapiens GN=AP1G2 PE=1 SV=1                                              |            |         |
| 075844                | FACE1_HUMAN CAAX prenyl protease 1 homolog OS=Homo sapiens GN=ZMPSTE24 PE=1 SV=2                                              |            | 91.59   |
| 075874                | IDHC_HUMAN Isocitrate dehydrogenase [NADP] cytoplasmic OS=Homo sapiens GN=IDH1 PE=1 SV=2                                      |            |         |
| 075880                | SCO1_HUMAN Protein SCO1 homolog, mitochondrial OS=Homo sapiens GN=SCO1 PE=1 SV=1                                              |            | 93.86   |
| 075886;075886-2       | STAM2_HUMAN Signal transducing adapter molecule 2 OS=Homo sapiens GN=STAM2 PE=1 SV=1;>sp O75886-2 STAM2_HUMAN Isof            | 7.16E-14   |         |
| 075891                | AL1L1_HUMAN Aldehyde dehydrogenase family 1 member L1 OS=Homo sapiens GN=ALDH1L1 PE=1 SV=2                                    | 1.42E-14   |         |
| 075896                | TUSC2_HUMAN Tumor suppressor candidate 2 OS=Homo sapiens GN=TUSC2 PE=1 SV=3                                                   | 0.00024521 |         |
| 075909-4;075909;07590 | 4 CCNK_HUMAN Isoform 4 of Cyclin-K OS=Homo sapiens GN=CCNK;>sp O75909 CCNK_HUMAN Cyclin-K OS=Homo sapiens GN=CCN              | 1.10E-16   |         |
| 075911                | DHRS3_HUMAN Short-chain dehydrogenase/reductase 3 OS=Homo sapiens GN=DHRS3 PE=1 SV=2                                          | 3.63E-13   |         |
| 075915                | PRAF3_HUMAN PRA1 family protein 3 OS=Homo sapiens GN=ARL6IP5 PE=1 SV=1                                                        |            | 18.55   |
| 075923                | DYSF_HUMAN Dysferlin OS=Homo sapiens GN=DYSF PE=1 SV=1                                                                        |            | 225.89  |
| 075923-10             | DYSF_HUMAN Isoform 10 of Dysferlin OS=Homo sapiens GN=DYSF                                                                    |            | 225.89  |
| 075923-11             | DYSF_HUMAN Isoform 11 of Dysferlin OS=Homo sapiens GN=DYSF                                                                    |            | 225.89  |
| 075923-12             | DYSF_HUMAN Isoform 12 of Dysferlin OS=Homo sapiens GN=DYSF                                                                    |            | 225.89  |
| 075923-13             | DYSF_HUMAN Isoform 13 of Dysferlin OS=Homo sapiens GN=DYSF                                                                    |            | 225.89  |
| 075923-13;075923-7;07 | 13 DYSF_HUMAN Isoform 13 of Dysferlin OS=Homo sapiens GN=DYSF;>sp O75923-7 DYSF_HUMAN Isoform 7 of Dysferlin OS=Homc          | 4.96E-19   |         |
| 075923-14             | DYSF_HUMAN Isoform 14 of Dysferlin OS=Homo sapiens GN=DYSF                                                                    |            | 225.89  |
| 075923-15             | DYSF_HUMAN Isoform 15 of Dysferlin OS=Homo sapiens GN=DYSF                                                                    |            | 225.73  |

|                       |                                                                                                                        |           |        |
|-----------------------|------------------------------------------------------------------------------------------------------------------------|-----------|--------|
| 075923-2              | DYSF_HUMAN Isoform 2 of Dysferlin OS=Homo sapiens GN=DYSF                                                              |           | 225.89 |
| 075923-3              | DYSF_HUMAN Isoform 3 of Dysferlin OS=Homo sapiens GN=DYSF                                                              |           | 225.89 |
| 075923-4              | DYSF_HUMAN Isoform 4 of Dysferlin OS=Homo sapiens GN=DYSF                                                              |           | 225.89 |
| 075923-5              | DYSF_HUMAN Isoform 5 of Dysferlin OS=Homo sapiens GN=DYSF                                                              |           | 225.89 |
| 075923-6              | DYSF_HUMAN Isoform 6 of Dysferlin OS=Homo sapiens GN=DYSF                                                              |           | 225.89 |
| 075923-7              | DYSF_HUMAN Isoform 7 of Dysferlin OS=Homo sapiens GN=DYSF                                                              |           | 225.89 |
| 075923-8              | DYSF_HUMAN Isoform 8 of Dysferlin OS=Homo sapiens GN=DYSF                                                              |           | 225.89 |
| 075923-9              | DYSF_HUMAN Isoform 9 of Dysferlin OS=Homo sapiens GN=DYSF                                                              |           | 225.89 |
| 075934                | SPF27_HUMAN Pre-splicing factor SPF27 OS=Homo sapiens GN=BCAS2 PE=1 SV=1                                               |           | 295.85 |
| 075935;075935-3;07593 | DCTN3_HUMAN Dynactin subunit 3 OS=Homo sapiens GN=DCTN3 PE=1 SV=1;>sp 075935-3 DCTN3_HUMAN Isoform 3 of Dynactin       | 2.98E-18  |        |
| 075937                | DNJC8_HUMAN DnaJ homolog subfamily C member 8 OS=Homo sapiens GN=DNAJC8 PE=1 SV=2                                      |           | 167.3  |
| 075940                | SPF30_HUMAN Survival of motor neuron-related-splicing factor 30 OS=Homo sapiens GN=SMNDC1 PE=1 SV=1                    |           |        |
| 075947                | ATP5H_HUMAN ATP synthase subunit d, mitochondrial OS=Homo sapiens GN=ATP5H PE=1 SV=3                                   |           | 377.77 |
| 075947-2              | ATP5H_HUMAN Isoform 2 of ATP synthase subunit d, mitochondrial OS=Homo sapiens GN=ATP5H                                |           | 377.77 |
| 075947;075947-2       | ATP5H_HUMAN ATP synthase subunit d, mitochondrial OS=Homo sapiens GN=ATP5H PE=1 SV=3;>sp 075947-2 ATP5H_HUMAN Isofo    | 4.58E-172 |        |
| 075955                | FLOT1_HUMAN Flotillin-1 OS=Homo sapiens GN=FLOT1 PE=1 SV=3                                                             |           | 813.86 |
| 075962                | TRIO_HUMAN Triple functional domain protein OS=Homo sapiens GN=TRIO PE=1 SV=2                                          |           | 47.1   |
| 075962-2              | TRIO_HUMAN Isoform 2 of Triple functional domain protein OS=Homo sapiens GN=TRIO                                       |           | 47.1   |
| 075962-3              | TRIO_HUMAN Isoform 3 of Triple functional domain protein OS=Homo sapiens GN=TRIO                                       |           |        |
| 075962-4              | TRIO_HUMAN Isoform 4 of Triple functional domain protein OS=Homo sapiens GN=TRIO                                       |           | 41.57  |
| 075962-5              | TRIO_HUMAN Isoform 5 of Triple functional domain protein OS=Homo sapiens GN=TRIO                                       |           | 47.1   |
| 075962;075962-2;07596 | TRIO_HUMAN Triple functional domain protein OS=Homo sapiens GN=TRIO PE=1 SV=2;>sp 075962-2 TRIO_HUMAN Isoform 2 of Tri | 9.10E-35  |        |
| 075964                | ATP5L_HUMAN ATP synthase subunit g, mitochondrial OS=Homo sapiens GN=ATP5L PE=1 SV=3                                   |           | 226.81 |
| 075976                | CBPD_HUMAN Carboxypeptidase D OS=Homo sapiens GN=CPD PE=1 SV=2                                                         |           | 237.86 |
| 076003                | GLRX3_HUMAN Glutaredoxin-3 OS=Homo sapiens GN=GLRX3 PE=1 SV=2                                                          |           |        |
| 076009                | KT33A_HUMAN Keratin, type I cuticular Ha3-I OS=Homo sapiens GN=KRT33A PE=1 SV=2                                        |           | 17.3   |
| 076011                | KRT34_HUMAN Keratin, type I cuticular Ha4 OS=Homo sapiens GN=KRT34 PE=1 SV=2                                           |           |        |
| 076013                | KRT36_HUMAN Keratin, type I cuticular Ha6 OS=Homo sapiens GN=KRT36 PE=1 SV=1                                           |           | 65.9   |
| 076013-2              | KRT36_HUMAN Isoform 2 of Keratin, type I cuticular Ha6 OS=Homo sapiens GN=KRT36                                        |           | 65.9   |
| 076014                | KRT37_HUMAN Keratin, type I cuticular Ha7 OS=Homo sapiens GN=KRT37 PE=2 SV=3                                           |           | 76.5   |
| 076015                | KRT38_HUMAN Keratin, type I cuticular Ha8 OS=Homo sapiens GN=KRT38 PE=2 SV=3                                           |           | 85.88  |
| 076021                | RL1D1_HUMAN Ribosomal L1 domain-containing protein 1 OS=Homo sapiens GN=RSL1D1 PE=1 SV=3                               |           | 166.24 |
| 076024                | WFS1_HUMAN Wolframín OS=Homo sapiens GN=WFS1 PE=1 SV=2                                                                 |           | 28.94  |
| 076031                | CLPX_HUMAN ATP-dependent Clp protease ATP-binding subunit clpX-like, mitochondrial OS=Homo sapiens GN=CLPX PE=1 SV=2   |           | 88.42  |
| 076041                | NEBL_HUMAN Nebulette OS=Homo sapiens GN=NEBL PE=2 SV=1                                                                 | 6.69E-11  |        |
| 076054                | S14L2_HUMAN SEC14-like protein 2 OS=Homo sapiens GN=SEC14L2 PE=1 SV=1                                                  | 1.46E-20  |        |
| 076061                | STC2_HUMAN Stanniocalcin-2 OS=Homo sapiens GN=STC2 PE=1 SV=1                                                           | 1.91E-05  |        |
| 076062                | ERG24_HUMAN Delta(14)-sterol reductase OS=Homo sapiens GN=TM7SF2 PE=2 SV=3                                             |           |        |
| 076062-2              | ERG24_HUMAN Isoform 2 of Delta(14)-sterol reductase OS=Homo sapiens GN=TM7SF2                                          |           |        |
| 076070                | SYUG_HUMAN Gamma-synuclein OS=Homo sapiens GN=SNCG PE=1 SV=2                                                           | 2.72E-152 |        |
| 076071                | CIAO1_HUMAN Probable cytosolic iron-sulfur protein assembly protein CIAO1 OS=Homo sapiens GN=CIAO1 PE=1 SV=1           | 3.36E-12  |        |
| 076083-5              | PDE9A_HUMAN Isoform PDE9A5 of High affinity cGMP-specific 3',5'-cyclic phosphodiesterase 9A OS=Homo sapiens GN=PDE9A   |           | 21.53  |
| 076094                | SRP72_HUMAN Signal recognition particle 72 kDa protein OS=Homo sapiens GN=SRP72 PE=1 SV=3                              |           | 315.04 |
| 076095                | JTB_HUMAN Protein JTB OS=Homo sapiens GN=JTB PE=1 SV=1                                                                 |           | 32.3   |
| 076095-2              | JTB_HUMAN Isoform 2 of Protein JTB OS=Homo sapiens GN=JTB                                                              |           | 32.3   |
| 094760                | DDAH1_HUMAN N(G),N(G)-dimethylarginine dimethylaminohydrolase 1 OS=Homo sapiens GN=DDAH1 PE=1 SV=3                     |           | 52.6   |
| 094763                | RMP_HUMAN Unconventional prefoldin RPB5 interactor OS=Homo sapiens GN=RMP PE=1 SV=3                                    |           | 41.16  |
| 094763-2              | RMP_HUMAN Isoform 2 of Unconventional prefoldin RPB5 interactor OS=Homo sapiens GN=RMP                                 |           | 41.16  |
| 094763;094763-2       | RMP_HUMAN Unconventional prefoldin RPB5 interactor OS=Homo sapiens GN=RMP PE=1 SV=3;>sp 094763-2 RMP_HUMAN Isoform     | 5.66E-05  |        |
| 094766                | B3GA3_HUMAN Galactosylgalactosylxylosylprotein 3-beta-glucuronosyltransferase 3 OS=Homo sapiens GN=B3GAT3 PE=1 SV=2    |           | 28.61  |
| 094776                | MTA2_HUMAN Metastasis-associated protein MTA2 OS=Homo sapiens GN=MTA2 PE=1 SV=1                                        |           | 26.65  |
| 094788                | AL1A2_HUMAN Retinal dehydrogenase 2 OS=Homo sapiens GN=ALDH1A2 PE=1 SV=3                                               |           |        |
| 094788-2              | AL1A2_HUMAN Isoform 2 of Retinal dehydrogenase 2 OS=Homo sapiens GN=ALDH1A2                                            |           |        |
| 094788;094788-2       | AL1A2_HUMAN Retinal dehydrogenase 2 OS=Homo sapiens GN=ALDH1A2 PE=1 SV=3;>sp 094788-2 AL1A2_HUMAN Isoform 2 of Re      | 3.02E-11  |        |
| 094804                | STK10_HUMAN Serine/threonine-protein kinase 10 OS=Homo sapiens GN=STK10 PE=1 SV=1                                      |           |        |
| 094805                | ACL6B_HUMAN Actin-like protein 6B OS=Homo sapiens GN=ACTL6B PE=1 SV=1                                                  |           |        |
| 094806-2              | KPCD3_HUMAN Isoform 2 of Serine/threonine-protein kinase D3 OS=Homo sapiens GN=PRKD3                                   |           |        |
| 094822                | LTN1_HUMAN E3 ubiquitin-protein ligase listerin OS=Homo sapiens GN=LTN1 PE=1 SV=6                                      | 3.14E-13  |        |
| 094823                | AT10B_HUMAN Probable phospholipid-transporting ATPase VB OS=Homo sapiens GN=ATP10B PE=2 SV=2                           |           |        |
| 094823-2              | AT10B_HUMAN Isoform B of Probable phospholipid-transporting ATPase VB OS=Homo sapiens GN=ATP10B                        |           |        |
| 094823-3              | AT10B_HUMAN Isoform C of Probable phospholipid-transporting ATPase VB OS=Homo sapiens GN=ATP10B                        |           |        |

|                       |                                                                                                                        |           |        |
|-----------------------|------------------------------------------------------------------------------------------------------------------------|-----------|--------|
| 094826                | TOM70_HUMAN Mitochondrial import receptor subunit TOM70 OS=Homo sapiens GN=TOMM70A PE=1 SV=1                           |           | 317.14 |
| 094832                | MYO1D_HUMAN Myosin-Id OS=Homo sapiens GN=MYO1D PE=1 SV=2                                                               |           |        |
| 094842;B4DPY8;B4DSM0  | TOX4_HUMAN TOX high mobility group box family member 4 OS=Homo sapiens GN=TOX4 PE=1 SV=1;>tr B4DPY8 B4DPY8_HUMAN c     | 1.38E-06  |        |
| 094851;094851-2       | MICA2_HUMAN Protein MICAL-2 OS=Homo sapiens GN=MICAL2 PE=1 SV=1;>sp 094851-2 MICA2_HUMAN Isoform 2 of Protein MICA     | 1.39E-21  |        |
| 094855-2;A8K6V0;09485 | 2 SC24D_HUMAN Isoform 2 of Protein transport protein Sec24D OS=Homo sapiens GN=SEC24D;>tr A8K6V0 A8K6V0_HUMAN cDNA F   | 2.70E-71  |        |
| 094874;094874-2       | UFL1_HUMAN E3 UFM1-protein ligase 1 OS=Homo sapiens GN=KIAA0776 PE=1 SV=2;>sp 094874-2 UFL1_HUMAN Isoform 2 of E3 U    | 3.03E-23  |        |
| 094875-6              | SRBS2_HUMAN Isoform 6 of Sorbin and SH3 domain-containing protein 2 OS=Homo sapiens GN=SORBS2                          |           |        |
| 094880                | PHF14_HUMAN PHD finger protein 14 OS=Homo sapiens GN=PHF14 PE=1 SV=2                                                   |           |        |
| 094880-2              | PHF14_HUMAN Isoform 2 of PHD finger protein 14 OS=Homo sapiens GN=PHF14                                                |           |        |
| 094886                | TM63A_HUMAN Transmembrane protein 63A OS=Homo sapiens GN=TMEM63A PE=1 SV=3                                             | 1.28E-09  |        |
| 094888                | UBXN7_HUMAN UBX domain-containing protein 7 OS=Homo sapiens GN=UBXN7 PE=1 SV=2                                         |           | 92.14  |
| 094901                | SUN1_HUMAN SUN domain-containing protein 1 OS=Homo sapiens GN=SUN1 PE=1 SV=3                                           |           |        |
| 094901-5              | SUN1_HUMAN Isoform 5 of SUN domain-containing protein 1 OS=Homo sapiens GN=SUN1                                        |           |        |
| 094903                | PROSC_HUMAN Proline synthase co-transcribed bacterial homolog protein OS=Homo sapiens GN=PROSC PE=1 SV=1               |           | 54.46  |
| 094905                | ERLN2_HUMAN Erlin-2 OS=Homo sapiens GN=ERLN2 PE=1 SV=1                                                                 |           | 430.74 |
| 094905-2              | ERLN2_HUMAN Isoform 2 of Erlin-2 OS=Homo sapiens GN=ERLN2                                                              |           | 181.71 |
| 094905-3              | ERLN2_HUMAN Isoform 3 of Erlin-2 OS=Homo sapiens GN=ERLN2                                                              |           | 181.71 |
| 094906                | PRP6_HUMAN Pre-processing factor 6 OS=Homo sapiens GN=PRPF6 PE=1 SV=1                                                  |           | 387.61 |
| 094915                | FRYL_HUMAN Protein furry homolog-like OS=Homo sapiens GN=FRYL PE=1 SV=2                                                | 3.91E-08  |        |
| 094919                | ENDD1_HUMAN Endonuclease domain-containing 1 protein OS=Homo sapiens GN=ENDOD1 PE=1 SV=2                               |           | 70.67  |
| 094921                | CDK14_HUMAN Cyclin-dependent kinase 14 OS=Homo sapiens GN=CDK14 PE=1 SV=3                                              |           | 48.83  |
| 094921-2              | CDK14_HUMAN Isoform 2 of Cyclin-dependent kinase 14 OS=Homo sapiens GN=CDK14                                           |           | 48.83  |
| 094921-3              | CDK14_HUMAN Isoform 3 of Cyclin-dependent kinase 14 OS=Homo sapiens GN=CDK14                                           |           | 48.83  |
| 094925                | GLSK_HUMAN Glutaminase kidney isoform, mitochondrial OS=Homo sapiens GN=GLS PE=1 SV=1                                  |           | 118.65 |
| 094925-2              | GLSK_HUMAN Isoform 2 of Glutaminase kidney isoform, mitochondrial OS=Homo sapiens GN=GLS                               |           | 58.93  |
| 094925-3              | GLSK_HUMAN Isoform 3 of Glutaminase kidney isoform, mitochondrial OS=Homo sapiens GN=GLS                               |           | 118.65 |
| 094925-3;A8K132;09492 | 3 GLSK_HUMAN Isoform 3 of Glutaminase kidney isoform, mitochondrial OS=Homo sapiens GN=GLS;>tr A8K132 A8K132_HUMAN cD  | 1.44E-208 |        |
| 094964-2;094964;09496 | 2 K0889_HUMAN Isoform 2 of Uncharacterized protein KIAA0889 OS=Homo sapiens GN=KIAA0889;>sp 094964 K0889_HUMAN Unct    | 1.83E-34  |        |
| 094973                | AP2A2_HUMAN AP-2 complex subunit alpha-2 OS=Homo sapiens GN=AP2A2 PE=1 SV=2                                            |           | 424.85 |
| 094973-2              | AP2A2_HUMAN Isoform 2 of AP-2 complex subunit alpha-2 OS=Homo sapiens GN=AP2A2                                         |           | 424.85 |
| 094973-2;094973;B7Z5S | 2 AP2A2_HUMAN Isoform 2 of AP-2 complex subunit alpha-2 OS=Homo sapiens GN=AP2A2;>sp 094973 AP2A2_HUMAN AP-2 comple    | 1.24E-101 |        |
| 094973-3              | AP2A2_HUMAN Isoform 3 of AP-2 complex subunit alpha-2 OS=Homo sapiens GN=AP2A2                                         |           | 336.68 |
| 094979                | SC31A_HUMAN Protein transport protein Sec31A OS=Homo sapiens GN=SEC31A PE=1 SV=3                                       |           |        |
| 094979-2              | SC31A_HUMAN Isoform 2 of Protein transport protein Sec31A OS=Homo sapiens GN=SEC31A                                    |           |        |
| 094979-3              | SC31A_HUMAN Isoform 3 of Protein transport protein Sec31A OS=Homo sapiens GN=SEC31A                                    |           |        |
| 094979-4              | SC31A_HUMAN Isoform 4 of Protein transport protein Sec31A OS=Homo sapiens GN=SEC31A                                    |           |        |
| 094979-5              | SC31A_HUMAN Isoform 5 of Protein transport protein Sec31A OS=Homo sapiens GN=SEC31A                                    |           |        |
| 094979-6              | SC31A_HUMAN Isoform 6 of Protein transport protein Sec31A OS=Homo sapiens GN=SEC31A                                    |           |        |
| 094979-7              | SC31A_HUMAN Isoform 7 of Protein transport protein Sec31A OS=Homo sapiens GN=SEC31A                                    |           |        |
| 094979-8              | SC31A_HUMAN Isoform 8 of Protein transport protein Sec31A OS=Homo sapiens GN=SEC31A                                    |           |        |
| 094979-8;094979;09497 | 8 SC31A_HUMAN Isoform 8 of Protein transport protein Sec31A OS=Homo sapiens GN=SEC31A;>sp 094979 SC31A_HUMAN Protein   | 2.37E-46  |        |
| 094992                | HEXI1_HUMAN Protein HEXIM1 OS=Homo sapiens GN=HEXIM1 PE=1 SV=1                                                         | 4.58E-18  |        |
| 095049                | ZO3_HUMAN Tight junction protein ZO-3 OS=Homo sapiens GN=TJP3 PE=1 SV=2                                                |           |        |
| 095049-2              | ZO3_HUMAN Isoform 2 of Tight junction protein ZO-3 OS=Homo sapiens GN=TJP3                                             |           |        |
| 095049-3              | ZO3_HUMAN Isoform 3 of Tight junction protein ZO-3 OS=Homo sapiens GN=TJP3                                             |           |        |
| 095059                | RPP14_HUMAN Ribonuclease P protein subunit p14 OS=Homo sapiens GN=RPP14 PE=1 SV=3                                      |           | 194.46 |
| 095070                | YIF1A_HUMAN Protein YIF1A OS=Homo sapiens GN=YIF1A PE=1 SV=2                                                           |           | 113.65 |
| 095071                | UBR5_HUMAN E3 ubiquitin-protein ligase UBR5 OS=Homo sapiens GN=UBR5 PE=1 SV=2                                          |           | 244.05 |
| 095073                | FSBP_HUMAN Fibrinogen silencer-binding protein OS=Homo sapiens GN=FSBP PE=1 SV=1                                       |           |        |
| 095073-2              | FSBP_HUMAN Isoform 2 of Fibrinogen silencer-binding protein OS=Homo sapiens GN=FSBP                                    |           |        |
| 095076                | ALX3_HUMAN Homeobox protein aristaless-like 3 OS=Homo sapiens GN=ALX3 PE=1 SV=2                                        |           |        |
| 095096                | NKX22_HUMAN Homeobox protein Nkx-2.2 OS=Homo sapiens GN=NKX2-2 PE=2 SV=1                                               |           |        |
| 095104                | SFR15_HUMAN Splicing factor, arginine/serine-rich 15 OS=Homo sapiens GN=SCAF4 PE=1 SV=3                                |           | 64.58  |
| 095104-2              | SFR15_HUMAN Isoform 2 of Splicing factor, arginine/serine-rich 15 OS=Homo sapiens GN=SCAF4                             |           | 64.58  |
| 095104;095104-2       | SFR15_HUMAN Splicing factor, arginine/serine-rich 15 OS=Homo sapiens GN=SCAF4 PE=1 SV=3;>sp 095104-2 SFR15_HUMAN Isofo | 1.49E-15  |        |
| 095139                | NDUB6_HUMAN NADH dehydrogenase [ubiquinone] 1 beta subcomplex subunit 6 OS=Homo sapiens GN=NDUFB6 PE=1 SV=3            |           | 89.32  |
| 095140                | MFN2_HUMAN Mitofusin-2 OS=Homo sapiens GN=MFN2 PE=1 SV=3                                                               |           |        |
| 095140-2              | MFN2_HUMAN Isoform 2 of Mitofusin-2 OS=Homo sapiens GN=MFN2                                                            |           |        |
| 095154                | ARK73_HUMAN Aflatoxin B1 aldehyde reductase member 3 OS=Homo sapiens GN=AKR7A3 PE=1 SV=2                               | 1.33E-110 |        |
| 095155;A8K8S9;095155- | UBE4B_HUMAN Ubiquitin conjugation factor E4 B OS=Homo sapiens GN=UBE4B PE=1 SV=1;>tr A8K8S9 A8K8S9_HUMAN cDNA FLJ7     | 4.54E-07  |        |
| 095159                | ZFPL1_HUMAN Zinc finger protein-like 1 OS=Homo sapiens GN=ZFPL1 PE=1 SV=2                                              |           | 86.07  |

|                         |                                                                                                                               |           |        |
|-------------------------|-------------------------------------------------------------------------------------------------------------------------------|-----------|--------|
| O95163                  | ELP1_HUMAN Elongator complex protein 1 OS=Homo sapiens GN=IKBKAP PE=1 SV=3                                                    | 6.51E-43  |        |
| O95168                  | NDUB4_HUMAN NADH dehydrogenase [ubiquinone] 1 beta subcomplex subunit 4 OS=Homo sapiens GN=NDUB4 PE=1 SV=3                    |           |        |
| O95169                  | NDUB8_HUMAN NADH dehydrogenase [ubiquinone] 1 beta subcomplex subunit 8, mitochondrial OS=Homo sapiens GN=NDUFB8 PE=1 SV=1    |           | 70.25  |
| O95170                  | CDRT1_HUMAN CMT1A duplicated region transcript 1 protein OS=Homo sapiens GN=CDRT1 PE=2 SV=3                                   |           |        |
| O95170-2                | CDRT1_HUMAN Isoform 2 of CMT1A duplicated region transcript 1 protein OS=Homo sapiens GN=CDRT1                                |           |        |
| O95171                  | SCEL_HUMAN Sciellin OS=Homo sapiens GN=SCEL PE=1 SV=2                                                                         |           |        |
| O95171-2                | SCEL_HUMAN Isoform 2 of Sciellin OS=Homo sapiens GN=SCEL                                                                      |           |        |
| O95182                  | NDUA7_HUMAN NADH dehydrogenase [ubiquinone] 1 alpha subcomplex subunit 7 OS=Homo sapiens GN=NDUFA7 PE=1 SV=3                  |           | 132.91 |
| O95197                  | RTN3_HUMAN Reticulon-3 OS=Homo sapiens GN=RTN3 PE=1 SV=2                                                                      |           | 145.87 |
| O95197-2                | RTN3_HUMAN Isoform 2 of Reticulon-3 OS=Homo sapiens GN=RTN3                                                                   |           | 145.87 |
| O95197-3                | RTN3_HUMAN Isoform 3 of Reticulon-3 OS=Homo sapiens GN=RTN3                                                                   |           | 148.57 |
| O95197-4                | RTN3_HUMAN Isoform 4 of Reticulon-3 OS=Homo sapiens GN=RTN3                                                                   |           | 134.67 |
| O95197-5                | RTN3_HUMAN Isoform 5 of Reticulon-3 OS=Homo sapiens GN=RTN3                                                                   |           | 53.44  |
| O95197-5;O95197-3;B7Z-5 | RTN3_HUMAN Isoform 5 of Reticulon-3 OS=Homo sapiens GN=RTN3;>sp O95197-3 RTN3_HUMAN Isoform 3 of Reticulon-3 OS=Ho            | 3.84E-14  |        |
| O95197;O95197-2;O9519   | RTN3_HUMAN Reticulon-3 OS=Homo sapiens GN=RTN3 PE=1 SV=2;>sp O95197-2 RTN3_HUMAN Isoform 2 of Reticulon-3 OS=Homo             | 3.22E-15  |        |
| O95202                  | LETM1_HUMAN LETM1 and EF-hand domain-containing protein 1, mitochondrial OS=Homo sapiens GN=LETM1 PE=1 SV=1                   |           | 465.46 |
| O95202-2                | LETM1_HUMAN Isoform 2 of LETM1 and EF-hand domain-containing protein 1, mitochondrial OS=Homo sapiens GN=LETM1                |           | 151.42 |
| O95202-3                | LETM1_HUMAN Isoform 3 of LETM1 and EF-hand domain-containing protein 1, mitochondrial OS=Homo sapiens GN=LETM1                |           | 151.42 |
| O95202;D3DVQ1           | LETM1_HUMAN LETM1 and EF-hand domain-containing protein 1, mitochondrial OS=Homo sapiens GN=LETM1 PE=1 SV=1;>tr D3DVC         | 3.29E-195 |        |
| O95208                  | EPN2_HUMAN Epsin-2 OS=Homo sapiens GN=EPN2 PE=1 SV=3                                                                          |           | 32.77  |
| O95208-2                | EPN2_HUMAN Isoform 2 of Epsin-2 OS=Homo sapiens GN=EPN2                                                                       |           | 32.77  |
| O95208-3                | EPN2_HUMAN Isoform 3 of Epsin-2 OS=Homo sapiens GN=EPN2                                                                       |           | 20.66  |
| O95214                  | LRL1_HUMAN Leptin receptor overlapping transcript-like 1 OS=Homo sapiens GN=LEPROTL1 PE=2 SV=2                                |           | 34.68  |
| O95218                  | ZRAB2_HUMAN Zinc finger Ran-binding domain-containing protein 2 OS=Homo sapiens GN=ZRANB2 PE=1 SV=2                           |           |        |
| O95218-2                | ZRAB2_HUMAN Isoform 2 of Zinc finger Ran-binding domain-containing protein 2 OS=Homo sapiens GN=ZRANB2                        |           |        |
| O95218;O95218-2         | ZRAB2_HUMAN Zinc finger Ran-binding domain-containing protein 2 OS=Homo sapiens GN=ZRANB2 PE=1 SV=2;>sp O95218-2 ZRAI         | 8.85E-58  |        |
| O95219                  | SNX4_HUMAN Sorting nexin-4 OS=Homo sapiens GN=SNX4 PE=1 SV=1                                                                  |           | 64.61  |
| O95229                  | ZWINT_HUMAN ZW10 interactor OS=Homo sapiens GN=ZWINT PE=1 SV=2                                                                | 4.11E-07  |        |
| O95231                  | VENTX_HUMAN Homeobox protein VENTX OS=Homo sapiens GN=VENTX PE=2 SV=1                                                         |           |        |
| O95232                  | LC7L3_HUMAN Luc7-like protein 3 OS=Homo sapiens GN=LUC7L3 PE=1 SV=2                                                           |           | 142.5  |
| O95232-2                | LC7L3_HUMAN Isoform 2 of Luc7-like protein 3 OS=Homo sapiens GN=LUC7L3                                                        |           |        |
| O95236;O95236-2;O9523   | APOL3_HUMAN Apolipoprotein L3 OS=Homo sapiens GN=APOL3 PE=2 SV=3;>sp O95236-2 APOL3_HUMAN Isoform 2 of Apolipoprote           | 7.32E-21  |        |
| O95239                  | KIF4A_HUMAN Chromosome-associated kinesin KIF4A OS=Homo sapiens GN=KIF4A PE=1 SV=3                                            |           | 46.17  |
| O95239-2                | KIF4A_HUMAN Isoform 2 of Chromosome-associated kinesin KIF4A OS=Homo sapiens GN=KIF4A                                         |           |        |
| O95239;O95239-2         | KIF4A_HUMAN Chromosome-associated kinesin KIF4A OS=Homo sapiens GN=KIF4A PE=1 SV=3;>sp O95239-2 KIF4A_HUMAN Isofor            | 3.33E-34  |        |
| O95249                  | GOSR1_HUMAN Golgi SNAP receptor complex member 1 OS=Homo sapiens GN=GOSR1 PE=1 SV=1                                           |           | 135.36 |
| O95251                  | MYST2_HUMAN Histone acetyltransferase MYST2 OS=Homo sapiens GN=MYST2 PE=1 SV=1                                                |           |        |
| O95255                  | MRP6_HUMAN Multidrug resistance-associated protein 6 OS=Homo sapiens GN=ABCC6 PE=1 SV=2                                       |           |        |
| O95259                  | KCNH1_HUMAN Potassium voltage-gated channel subfamily H member 1 OS=Homo sapiens GN=KCNH1 PE=1 SV=1                           |           | 1.89   |
| O95259-2                | KCNH1_HUMAN Isoform 1 of Potassium voltage-gated channel subfamily H member 1 OS=Homo sapiens GN=KCNH1                        |           | 1.89   |
| O95273;O95273-2         | CCDB1_HUMAN Cyclin-D1-binding protein 1 OS=Homo sapiens GN=CCNBP1 PE=1 SV=2;>sp O95273-2 CCDB1_HUMAN Isoform 2 o              | 1.97E-06  |        |
| O95292                  | VAPB_HUMAN Vesicle-associated membrane protein-associated protein B/C OS=Homo sapiens GN=VAPB PE=1 SV=3                       |           | 304.38 |
| O95292-2                | VAPB_HUMAN Isoform 2 of Vesicle-associated membrane protein-associated protein B/C OS=Homo sapiens GN=VAPB                    |           | 120.89 |
| O95292;Q53XM7;B3KVU7    | VAPB_HUMAN Vesicle-associated membrane protein-associated protein B/C OS=Homo sapiens GN=VAPB PE=1 SV=3;>tr Q53XM7 Q5         | 1.66E-52  |        |
| O95294;O95294-2         | RASL1_HUMAN RasGAP-activating-like protein 1 OS=Homo sapiens GN=RASAL1 PE=1 SV=3;>sp O95294-2 RASL1_HUMAN Isoform 2           | 3.87E-15  |        |
| O95297                  | MPZL1_HUMAN Myelin protein zero-like protein 1 OS=Homo sapiens GN=MPZL1 PE=1 SV=1                                             |           | 79.89  |
| O95297-2                | MPZL1_HUMAN Isoform 2 of Myelin protein zero-like protein 1 OS=Homo sapiens GN=MPZL1                                          |           | 79.89  |
| O95297-3                | MPZL1_HUMAN Isoform 3 of Myelin protein zero-like protein 1 OS=Homo sapiens GN=MPZL1                                          |           | 52.65  |
| O95297-3;Q9UEL6         | 3 MPZL1_HUMAN Isoform 3 of Myelin protein zero-like protein 1 OS=Homo sapiens GN=MPZL1;>tr Q9UEL6 Q9UEL6_HUMAN Putative       | 5.18E-05  |        |
| O95297-4                | MPZL1_HUMAN Isoform 4 of Myelin protein zero-like protein 1 OS=Homo sapiens GN=MPZL1                                          |           | 79.89  |
| O95297;O95297-2;O9529   | MPZL1_HUMAN Myelin protein zero-like protein 1 OS=Homo sapiens GN=MPZL1 PE=1 SV=1;>sp O95297-2 MPZL1_HUMAN Isoform 2          | 8.26E-43  |        |
| O95298                  | NDUC2_HUMAN NADH dehydrogenase [ubiquinone] 1 subunit C2 OS=Homo sapiens GN=NDUFC2 PE=1 SV=1                                  |           |        |
| O95299                  | NDUAA_HUMAN NADH dehydrogenase [ubiquinone] 1 alpha subcomplex subunit 10, mitochondrial OS=Homo sapiens GN=NDUFA10 PE=1 SV=1 |           | 139.09 |
| O95302                  | FKBP9_HUMAN Peptidyl-prolyl cis-trans isomerase FKBP9 OS=Homo sapiens GN=FKBP9 PE=1 SV=2                                      |           |        |
| O95319                  | CELF2_HUMAN CUGBP Elav-like family member 2 OS=Homo sapiens GN=CELF2 PE=1 SV=1                                                |           | 27.76  |
| O95319-2                | CELF2_HUMAN Isoform 2 of CUGBP Elav-like family member 2 OS=Homo sapiens GN=CELF2                                             |           | 27.76  |
| O95319-3                | CELF2_HUMAN Isoform 3 of CUGBP Elav-like family member 2 OS=Homo sapiens GN=CELF2                                             |           | 27.76  |
| O95319-3;O95319-4;O95   | 3 CELF2_HUMAN Isoform 3 of CUGBP Elav-like family member 2 OS=Homo sapiens GN=CELF2;>sp O95319-4 CELF2_HUMAN Isoform          | 4.99E-26  |        |
| O95319-4                | CELF2_HUMAN Isoform 4 of CUGBP Elav-like family member 2 OS=Homo sapiens GN=CELF2                                             |           | 27.76  |
| O95319-5                | CELF2_HUMAN Isoform 5 of CUGBP Elav-like family member 2 OS=Homo sapiens GN=CELF2                                             |           | 27.76  |
| O95336                  | 6PGL_HUMAN 6-phosphogluconolactonase OS=Homo sapiens GN=PGLS PE=1 SV=2                                                        |           | 189.19 |



|                       |                                                                                                                                       |           |        |
|-----------------------|---------------------------------------------------------------------------------------------------------------------------------------|-----------|--------|
| 095340-2;095340       | 2 PAPS2_HUMAN Isoform B of Bifunctional 3-phosphoadenosine 5-phosphosulfate synthase 2 OS=Homo sapiens GN=PAPSS2;>sp O9!              | 3.40E-45  |        |
| 095342                | ABCBB_HUMAN Bile salt export pump OS=Homo sapiens GN=ABCBB1 PE=1 SV=2                                                                 |           |        |
| 095347;095347-2       | SMC2_HUMAN Structural maintenance of chromosomes protein 2 OS=Homo sapiens GN=SMC2 PE=1 SV=2;>sp O95347-2 SMC2_HUI                    | 5.96E-117 |        |
| 095352;095352-2       | ATG7_HUMAN Ubiquitin-like modifier-activating enzyme ATG7 OS=Homo sapiens GN=ATG7 PE=1 SV=1;>sp O95352-2 ATG7_HUMAN                   | 8.77E-13  |        |
| 095359;095359-3       | TACC2_HUMAN Transforming acidic coiled-coil-containing protein 2 OS=Homo sapiens GN=TACC2 PE=1 SV=3;>sp O95359-3 TACC2_               | 3.76E-181 |        |
| 095365                | ZBT7A_HUMAN Zinc finger and BTB domain-containing protein 7A OS=Homo sapiens GN=ZBTB7A PE=1 SV=1                                      |           |        |
| 095372                | LYPA2_HUMAN Acyl-protein thioesterase 2 OS=Homo sapiens GN=LYPLA2 PE=1 SV=1                                                           |           | 39.88  |
| 095373                | IPO7_HUMAN Importin-7 OS=Homo sapiens GN=IPO7 PE=1 SV=1                                                                               |           | 233.61 |
| 095379                | TFIP8_HUMAN Tumor necrosis factor alpha-induced protein 8 OS=Homo sapiens GN=TNFAIP8 PE=1 SV=1                                        |           | 40.44  |
| 095379-2              | TFIP8_HUMAN Isoform 2 of Tumor necrosis factor alpha-induced protein 8 OS=Homo sapiens GN=TNFAIP8                                     |           | 40.44  |
| 095379-3              | TFIP8_HUMAN Isoform 3 of Tumor necrosis factor alpha-induced protein 8 OS=Homo sapiens GN=TNFAIP8                                     |           | 40.44  |
| 095379;095379-2;09537 | TFIP8_HUMAN Tumor necrosis factor alpha-induced protein 8 OS=Homo sapiens GN=TNFAIP8 PE=2 SV=1;>sp O95379-2 TFIP8_HUM.                | 9.64E-08  |        |
| 095391                | SLU7_HUMAN Pre-splicing factor SLU7 OS=Homo sapiens GN=SLU7 PE=1 SV=2                                                                 |           | 29.3   |
| 095394                | AGM1_HUMAN Phosphoacetylglucosamine mutase OS=Homo sapiens GN=PGM3 PE=1 SV=1                                                          |           | 59.35  |
| 095395                | GCNT3_HUMAN Beta-1,3-galactosyl-O-glycosyl-glycoprotein beta-1,6-N-acetylglucosaminyltransferase 3 OS=Homo sapiens GN=GCNT3 PE=2 SV=1 |           |        |
| 095396                | MOCS3_HUMAN Adenylyltransferase and sulfurtransferase MOCS3 OS=Homo sapiens GN=MOCS3 PE=1 SV=1                                        | 2.27E-23  |        |
| 095399                | UTS2_HUMAN Urotensin-2 OS=Homo sapiens GN=UTS2 PE=1 SV=1                                                                              |           | 42.23  |
| 095399-2              | UTS2_HUMAN Isoform 2 of Urotensin-2 OS=Homo sapiens GN=UTS2                                                                           |           | 42.23  |
| 095400                | CD2B2_HUMAN CD2 antigen cytoplasmic tail-binding protein 2 OS=Homo sapiens GN=CD2BP2 PE=1 SV=1                                        |           |        |
| 095425                | SVIL_HUMAN Supervillin OS=Homo sapiens GN=SVIL PE=1 SV=2                                                                              |           | 357.73 |
| 095425-2              | SVIL_HUMAN Isoform 2 of Supervillin OS=Homo sapiens GN=SVIL                                                                           |           | 335.71 |
| 095425;095425-2       | SVIL_HUMAN Supervillin OS=Homo sapiens GN=SVIL PE=1 SV=2;>sp O95425-2 SVIL_HUMAN Isoform 2 of Supervillin OS=Homo sa                  | 5.97E-18  |        |
| 095428                | PPN_HUMAN Papilin OS=Homo sapiens GN=PAPLN PE=2 SV=4                                                                                  |           |        |
| 095428-4              | PPN_HUMAN Isoform 4 of Papilin OS=Homo sapiens GN=PAPLN                                                                               |           |        |
| 095428-5              | PPN_HUMAN Isoform 5 of Papilin OS=Homo sapiens GN=PAPLN                                                                               |           |        |
| 095428-6              | PPN_HUMAN Isoform 6 of Papilin OS=Homo sapiens GN=PAPLN                                                                               |           |        |
| 095433                | AHSA1_HUMAN Activator of 90 kDa heat shock protein ATPase homolog 1 OS=Homo sapiens GN=AHSA1 PE=1 SV=1                                |           | 70.36  |
| 095445                | APOM_HUMAN Apolipoprotein M OS=Homo sapiens GN=APOM PE=1 SV=2                                                                         | 2.07E-06  |        |
| 095450                | ATS2_HUMAN A disintegrin and metalloproteinase with thrombospondin motifs 2 OS=Homo sapiens GN=ADAMTS2 PE=2 SV=2                      |           |        |
| 095456                | PSMG1_HUMAN Proteasome assembly chaperone 1 OS=Homo sapiens GN=PSMG1 PE=1 SV=1                                                        |           | 39.96  |
| 095456-2              | PSMG1_HUMAN Isoform 2 of Proteasome assembly chaperone 1 OS=Homo sapiens GN=PSMG1                                                     |           | 39.96  |
| 095456-2;095456       | 2 PSMG1_HUMAN Isoform 2 of Proteasome assembly chaperone 1 OS=Homo sapiens GN=PSMG1;>sp O95456 PSMG1_HUMAN Protea                     | 2.20E-11  |        |
| 095456;095456-2       | PSMG1_HUMAN Proteasome assembly chaperone 1 OS=Homo sapiens GN=PSMG1 PE=1 SV=1;>sp O95456-2 PSMG1_HUMAN Isoform                       | 6.79E-18  |        |
| 095466                | FMNL_HUMAN Formin-like protein 1 OS=Homo sapiens GN=FMNL1 PE=1 SV=3                                                                   |           | 242.14 |
| 095466-2              | FMNL_HUMAN Isoform 2 of Formin-like protein 1 OS=Homo sapiens GN=FMNL1                                                                |           | 242.14 |
| 095466-2;095466       | 2 FMNL_HUMAN Isoform 2 of Formin-like protein 1 OS=Homo sapiens GN=FMNL1;>sp O95466 FMNL_HUMAN Formin-like protein 1 O                | 2.29E-44  |        |
| 095470                | SGPL1_HUMAN Sphingosine-1-phosphate lyase 1 OS=Homo sapiens GN=SGPL1 PE=1 SV=3                                                        |           | 65.76  |
| 095477                | ABCA1_HUMAN ATP-binding cassette sub-family A member 1 OS=Homo sapiens GN=ABCA1 PE=1 SV=3                                             |           | 74.93  |
| 095478                | NSA2_HUMAN Ribosome biogenesis protein NSA2 homolog OS=Homo sapiens GN=NSA2 PE=1 SV=1                                                 |           |        |
| 095479                | G6PE_HUMAN GDH/6PGL endoplasmic bifunctional protein OS=Homo sapiens GN=H6PD PE=1 SV=2                                                | 3.43E-27  |        |
| 095484                | CLD9_HUMAN Claudin-9 OS=Homo sapiens GN=CLDN9 PE=1 SV=1                                                                               |           | 79.62  |
| 095486                | SC24A_HUMAN Protein transport protein Sec24A OS=Homo sapiens GN=SEC24A PE=1 SV=2                                                      |           |        |
| 095487                | SC24B_HUMAN Protein transport protein Sec24B OS=Homo sapiens GN=SEC24B PE=1 SV=2                                                      |           |        |
| 095487-2              | SC24B_HUMAN Isoform 2 of Protein transport protein Sec24B OS=Homo sapiens GN=SEC24B                                                   |           |        |
| 095487;095487-2       | SC24B_HUMAN Protein transport protein Sec24B OS=Homo sapiens GN=SEC24B PE=1 SV=2;>sp O95487-2 SC24B_HUMAN Isoform                     | 7.26E-38  |        |
| 095503                | CBX6_HUMAN Chromobox protein homolog 6 OS=Homo sapiens GN=CBX6 PE=1 SV=1                                                              |           |        |
| 095551-2;095551;09555 | 2 TYDP2_HUMAN Isoform 2 of Tyrosyl-DNA phosphodiesterase 2 OS=Homo sapiens GN=TDP2;>sp O95551 TYDP2_HUMAN Tyrosyl-DN                  | 1.73E-12  |        |
| 095563                | BR44_HUMAN Brain protein 44 OS=Homo sapiens GN=BRP44 PE=1 SV=1                                                                        |           | 71.69  |
| 095571                | ETHE1_HUMAN Protein ETHE1, mitochondrial OS=Homo sapiens GN=ETHE1 PE=1 SV=2                                                           |           | 66.53  |
| 095573                | ACSL3_HUMAN Long-chain-fatty-acid--CoA ligase 3 OS=Homo sapiens GN=ACSL3 PE=1 SV=3                                                    |           | 269.47 |
| 095602                | RPA1_HUMAN DNA-directed RNA polymerase I subunit RPA1 OS=Homo sapiens GN=POLR1A PE=1 SV=2                                             |           | 79     |
| 095613                | PCNT_HUMAN Pericentrin OS=Homo sapiens GN=PCNT PE=1 SV=4                                                                              |           |        |
| 095613-2              | PCNT_HUMAN Isoform 2 of Pericentrin OS=Homo sapiens GN=PCNT                                                                           |           |        |
| 095626                | AN32D_HUMAN Acidic leucine-rich nuclear phosphoprotein 32 family member D OS=Homo sapiens GN=ANP32D PE=1 SV=2                         |           | 75.91  |
| 095630                | STABP_HUMAN STAM-binding protein OS=Homo sapiens GN=STAMPB PE=1 SV=1                                                                  | 8.89E-10  |        |
| 095639                | CPSF4_HUMAN Cleavage and polyadenylation specificity factor subunit 4 OS=Homo sapiens GN=CPSF4 PE=1 SV=1                              |           |        |
| 095639-2              | CPSF4_HUMAN Isoform 2 of Cleavage and polyadenylation specificity factor subunit 4 OS=Homo sapiens GN=CPSF4                           |           |        |
| 095639-3              | CPSF4_HUMAN Isoform 3 of Cleavage and polyadenylation specificity factor subunit 4 OS=Homo sapiens GN=CPSF4                           |           |        |
| 095639;095639-2;09563 | CPSF4_HUMAN Cleavage and polyadenylation specificity factor subunit 4 OS=Homo sapiens GN=CPSF4 PE=1 SV=1;>sp O95639-2 CP              | 3.59E-09  |        |
| 095671;095671-2       | ASML_HUMAN N-acetylserotonin O-methyltransferase-like protein OS=Homo sapiens GN=ASMTL PE=1 SV=3;>sp O95671-2 ASML_HI                 | 1.35E-10  |        |
| 095674                | CDS2_HUMAN Phosphatidate cytidyltransferase 2 OS=Homo sapiens GN=CDS2 PE=1 SV=1                                                       | 1.33E-06  |        |

|                            |                                                                                                                                |            |         |
|----------------------------|--------------------------------------------------------------------------------------------------------------------------------|------------|---------|
| 095678                     | K2C75_HUMAN Keratin, type II cytoskeletal 75 OS=Homo sapiens GN=KRT75 PE=1 SV=2                                                |            | 526.5   |
| 095684;095684-2            | FR10P_HUMAN FGFR1 oncogene partner OS=Homo sapiens GN=FGFR10P PE=1 SV=1;>sp 095684-2 FR10P_HUMAN Isoform 2 of FC               | 2.95E-09   |         |
| 095707                     | RPP29_HUMAN Ribonuclease P protein subunit p29 OS=Homo sapiens GN=POP4 PE=1 SV=2                                               |            | 124.59  |
| 095714                     | HERC2_HUMAN E3 ubiquitin-protein ligase HERC2 OS=Homo sapiens GN=HERC2 PE=1 SV=2                                               |            | 76.48   |
| 095716                     | RAB3D_HUMAN Ras-related protein Rab-3D OS=Homo sapiens GN=RAB3D PE=1 SV=1                                                      |            | 134.86  |
| 095718                     | ERR2_HUMAN Steroid hormone receptor ERR2 OS=Homo sapiens GN=ESRRB PE=1 SV=1                                                    |            | 28.97   |
| 095721                     | SNP29_HUMAN Synaptosomal-associated protein 29 OS=Homo sapiens GN=SNAP29 PE=1 SV=1                                             |            | 408.8   |
| 095741                     | CPNE6_HUMAN Copine-6 OS=Homo sapiens GN=CPNE6 PE=1 SV=3                                                                        |            | 27.17   |
| 095747                     | OXR1_HUMAN Serine/threonine-protein kinase OSR1 OS=Homo sapiens GN=OXR1 PE=1 SV=1                                              |            | 42.04   |
| 095749                     | GGPPS_HUMAN Geranylgeranyl pyrophosphate synthase OS=Homo sapiens GN=GGPS1 PE=1 SV=1                                           | 1.87E-12   |         |
| 095757                     | HS74L_HUMAN Heat shock 70 kDa protein 4L OS=Homo sapiens GN=HSPA4L PE=1 SV=3                                                   |            | 56.58   |
| 095758                     | ROD1_HUMAN Regulator of differentiation 1 OS=Homo sapiens GN=ROD1 PE=1 SV=2                                                    |            | 61.1    |
| 095758-1                   | ROD1_HUMAN Isoform 1 of Regulator of differentiation 1 OS=Homo sapiens GN=ROD1                                                 |            | 61.1    |
| 095758-2                   | ROD1_HUMAN Isoform 2 of Regulator of differentiation 1 OS=Homo sapiens GN=ROD1                                                 |            | 61.1    |
| 095758-4                   | ROD1_HUMAN Isoform 4 of Regulator of differentiation 1 OS=Homo sapiens GN=ROD1                                                 |            | 61.1    |
| 095758-4;095758-5;095758-5 | ROD1_HUMAN Isoform 4 of Regulator of differentiation 1 OS=Homo sapiens GN=ROD1;>sp 095758-5 ROD1_HUMAN Isoform 5 of F          | 5.70E-15   |         |
| 095758-5                   | ROD1_HUMAN Isoform 5 of Regulator of differentiation 1 OS=Homo sapiens GN=ROD1                                                 |            | 61.1    |
| 095759;Q0IIM8;095759-;     | TBCD8_HUMAN TBC1 domain family member 8 OS=Homo sapiens GN=TBC1D8 PE=1 SV=3;>sp Q0IIM8 TBC8B_HUMAN TBC1 domair                 | 3.22E-06   |         |
| 095777                     | NAA38_HUMAN N-alpha-acetyltransferase 38, NatC auxiliary subunit OS=Homo sapiens GN=NAA38 PE=1 SV=3                            |            | 327.67  |
| 095782                     | AP2A1_HUMAN AP-2 complex subunit alpha-1 OS=Homo sapiens GN=AP2A1 PE=1 SV=3                                                    |            | 1500.03 |
| 095782-2                   | AP2A1_HUMAN Isoform B of AP-2 complex subunit alpha-1 OS=Homo sapiens GN=AP2A1                                                 |            | 1500.03 |
| 095782;095782-2            | AP2A1_HUMAN AP-2 complex subunit alpha-1 OS=Homo sapiens GN=AP2A1 PE=1 SV=3;>sp 095782-2 AP2A1_HUMAN Isoform B of              | 1.55E-31   |         |
| 095786                     | DDX58_HUMAN Probable ATP-dependent RNA helicase DDX58 OS=Homo sapiens GN=DDX58 PE=1 SV=2                                       |            | 23.3    |
| 095786-2                   | DDX58_HUMAN Isoform 2 of Probable ATP-dependent RNA helicase DDX58 OS=Homo sapiens GN=DDX58                                    |            | 23.3    |
| 095786;095786-2            | DDX58_HUMAN Probable ATP-dependent RNA helicase DDX58 OS=Homo sapiens GN=DDX58 PE=1 SV=2;>sp 095786-2 DDX58_HUM                | 6.73E-100  |         |
| 095793                     | STAU1_HUMAN Double-stranded RNA-binding protein Staufen homolog 1 OS=Homo sapiens GN=STAU1 PE=1 SV=2                           |            | 567.97  |
| 095793-2                   | STAU1_HUMAN Isoform Short of Double-stranded RNA-binding protein Staufen homolog 1 OS=Homo sapiens GN=STAU1                    |            | 567.97  |
| 095793;095793-2            | STAU1_HUMAN Double-stranded RNA-binding protein Staufen homolog 1 OS=Homo sapiens GN=STAU1 PE=1 SV=2;>sp 095793-2 S            | 2.73E-60   |         |
| 095801                     | TTC4_HUMAN Tetratricopeptide repeat protein 4 OS=Homo sapiens GN=TTC4 PE=1 SV=3                                                | 3.68E-25   |         |
| 095810                     | SDPR_HUMAN Serum deprivation-response protein OS=Homo sapiens GN=SDPR PE=1 SV=3                                                |            | 367.08  |
| 095816                     | BAG2_HUMAN BAG family molecular chaperone regulator 2 OS=Homo sapiens GN=BAG2 PE=1 SV=1                                        |            | 523.79  |
| 095817                     | BAG3_HUMAN BAG family molecular chaperone regulator 3 OS=Homo sapiens GN=BAG3 PE=1 SV=3                                        |            | 27.81   |
| 095819                     | M4K4_HUMAN Mitogen-activated protein kinase kinase kinase 4 OS=Homo sapiens GN=MAP4K4 PE=1 SV=2                                |            | 128.57  |
| 095819-2                   | M4K4_HUMAN Isoform 2 of Mitogen-activated protein kinase kinase kinase 4 OS=Homo sapiens GN=MAP4K4                             |            | 128.57  |
| 095819-3                   | M4K4_HUMAN Isoform 3 of Mitogen-activated protein kinase kinase kinase 4 OS=Homo sapiens GN=MAP4K4                             |            | 128.57  |
| 095819-4                   | M4K4_HUMAN Isoform 4 of Mitogen-activated protein kinase kinase kinase 4 OS=Homo sapiens GN=MAP4K4                             |            | 128.57  |
| 095819-5                   | M4K4_HUMAN Isoform 5 of Mitogen-activated protein kinase kinase kinase 4 OS=Homo sapiens GN=MAP4K4                             |            | 128.57  |
| 095825                     | QORL1_HUMAN Quinone oxidoreductase-like protein 1 OS=Homo sapiens GN=CRYZL1 PE=1 SV=2                                          | 2.85E-11   |         |
| 095831                     | AIFM1_HUMAN Apoptosis-inducing factor 1, mitochondrial OS=Homo sapiens GN=AIFM1 PE=1 SV=1                                      |            | 390.02  |
| 095831-2                   | AIFM1_HUMAN Isoform 2 of Apoptosis-inducing factor 1, mitochondrial OS=Homo sapiens GN=AIFM1                                   |            | 157.59  |
| 095831-3                   | AIFM1_HUMAN Isoform 3 of Apoptosis-inducing factor 1, mitochondrial OS=Homo sapiens GN=AIFM1                                   |            | 384.65  |
| 095831;D3DTE9;095831-      | AIFM1_HUMAN Apoptosis-inducing factor 1, mitochondrial OS=Homo sapiens GN=AIFM1 PE=1 SV=1;>tr D3DTE9 D3DTE9_HUMAN Pr           | 4.41E-135  |         |
| 095832                     | CLD1_HUMAN Claudin-1 OS=Homo sapiens GN=CLDN1 PE=1 SV=1                                                                        | 3.29E-10   |         |
| 095833                     | CLIC3_HUMAN Chloride intracellular channel protein 3 OS=Homo sapiens GN=CLIC3 PE=1 SV=2                                        | 6.79E-19   |         |
| 095837                     | GNA14_HUMAN Guanine nucleotide-binding protein subunit alpha-14 OS=Homo sapiens GN=GNA14 PE=2 SV=1                             |            | 172.18  |
| 095838                     | GLP2R_HUMAN Glucagon-like peptide 2 receptor OS=Homo sapiens GN=GLP2R PE=1 SV=1                                                |            | 23.71   |
| 095861-2;C9JI50;D3DTA5     | 2 BPNT1_HUMAN Isoform 2 of 3(2),5-bisphosphate nucleotidase 1 OS=Homo sapiens GN=BPNT1;>tr C9JI50 C9JI50_HUMAN Unchara         | 1.89E-180  |         |
| 095864                     | FADS2_HUMAN Fatty acid desaturase 2 OS=Homo sapiens GN=FADS2 PE=1 SV=1                                                         |            | 63.13   |
| 095864-2                   | FADS2_HUMAN Isoform 2 of Fatty acid desaturase 2 OS=Homo sapiens GN=FADS2                                                      |            | 45.92   |
| 095864-3                   | FADS2_HUMAN Isoform 3 of Fatty acid desaturase 2 OS=Homo sapiens GN=FADS2                                                      |            | 17.21   |
| 095864;095864-2;09586      | FADS2_HUMAN Fatty acid desaturase 2 OS=Homo sapiens GN=FADS2 PE=1 SV=1;>sp 095864-2 FADS2_HUMAN Isoform 2 of Fatty a           | 9.98E-27   |         |
| 095865                     | DDAH2_HUMAN N(G),N(G)-dimethylarginine dimethylaminohydrolase 2 OS=Homo sapiens GN=DDAH2 PE=1 SV=1                             |            | 106.98  |
| 095876                     | FRITZ_HUMAN WD repeat-containing and planar cell polarity effector protein fritz homolog OS=Homo sapiens GN=WDPCP PE=1 SV=2    |            |         |
| 095876-2                   | FRITZ_HUMAN Isoform 2 of WD repeat-containing and planar cell polarity effector protein fritz homolog OS=Homo sapiens GN=WDPCP |            |         |
| 095876-3                   | FRITZ_HUMAN Isoform 3 of WD repeat-containing and planar cell polarity effector protein fritz homolog OS=Homo sapiens GN=WDPCP |            |         |
| 095881                     | TXD12_HUMAN Thioredoxin domain-containing protein 12 OS=Homo sapiens GN=TXNDC12 PE=1 SV=1                                      |            | 260.8   |
| 095905                     | SGT1_HUMAN Protein SGT1 OS=Homo sapiens GN=ECD PE=1 SV=1                                                                       | 2.70E-08   |         |
| 095926                     | SYF2_HUMAN Pre-splicing factor SYF2 OS=Homo sapiens GN=SYF2 PE=1 SV=1                                                          |            |         |
| 095967                     | FBLN4_HUMAN EGF-containing fibulin-like extracellular matrix protein 2 OS=Homo sapiens GN=EFEMP2 PE=1 SV=3                     | 0.00013111 |         |
| 095969                     | SG1D2_HUMAN Secretoglobin family 1D member 2 OS=Homo sapiens GN=SCGB1D2 PE=2 SV=1                                              | 2.76E-08   |         |
| 095983                     | MBD3_HUMAN Methyl-CpG-binding domain protein 3 OS=Homo sapiens GN=MBD3 PE=1 SV=1                                               |            | 77.26   |

|                        |                                                                                                                        |           |         |
|------------------------|------------------------------------------------------------------------------------------------------------------------|-----------|---------|
| O95983-2               | MBD3_HUMAN Isoform 2 of Methyl-CpG-binding domain protein 3 OS=Homo sapiens GN=MBD3                                    |           | 77.26   |
| O95983;O95983-2        | MBD3_HUMAN Methyl-CpG-binding domain protein 3 OS=Homo sapiens GN=MBD3 PE=1 SV=1;>sp O95983-2 MBD3_HUMAN Isoform       | 8.15E-10  |         |
| O95989                 | NUDT3_HUMAN Diphosphoinositol polyphosphate phosphohydrolase 1 OS=Homo sapiens GN=NUDT3 PE=1 SV=1                      | 1.47E-05  |         |
| O95994                 | AGR2_HUMAN Anterior gradient protein 2 homolog OS=Homo sapiens GN=AGR2 PE=1 SV=1                                       |           | 23.53   |
| O95999                 | BCL10_HUMAN B-cell lymphoma/leukemia 10 OS=Homo sapiens GN=BCL10 PE=1 SV=1                                             | 6.11E-16  |         |
| O96000                 | NDUBA_HUMAN NADH dehydrogenase [ubiquinone] 1 beta subcomplex subunit 10 OS=Homo sapiens GN=NDUFB10 PE=1 SV=3          |           | 248.59  |
| O96005                 | CLPT1_HUMAN Cleft lip and palate transmembrane protein 1 OS=Homo sapiens GN=CLPTM1 PE=1 SV=1                           |           | 38.78   |
| O96005-2               | CLPT1_HUMAN Isoform 2 of Cleft lip and palate transmembrane protein 1 OS=Homo sapiens GN=CLPTM1                        |           | 38.78   |
| O96005-2;O96005        | 2 CLPT1_HUMAN Isoform 2 of Cleft lip and palate transmembrane protein 1 OS=Homo sapiens GN=CLPTM1;>sp O96005 CLPT1_HUM | 3.89E-05  |         |
| O96007                 | MOC2B_HUMAN Molybdopterin synthase catalytic subunit OS=Homo sapiens GN=MOCS2 PE=1 SV=1                                |           | 24.88   |
| O96008                 | TOM40_HUMAN Mitochondrial import receptor subunit TOM40 homolog OS=Homo sapiens GN=TOMM40 PE=1 SV=1                    |           | 301.26  |
| O96008-2               | TOM40_HUMAN Isoform 2 of Mitochondrial import receptor subunit TOM40 homolog OS=Homo sapiens GN=TOMM40                 |           | 239.64  |
| O96008;O96008-2        | TOM40_HUMAN Mitochondrial import receptor subunit TOM40 homolog OS=Homo sapiens GN=TOMM40 PE=1 SV=1;>sp O96008-2 T     | 1.93E-209 |         |
| O96011                 | PX11B_HUMAN Peroxisomal membrane protein 11B OS=Homo sapiens GN=PEX11B PE=1 SV=1                                       |           |         |
| O96013-2;O96013;O9601  | 2 PAK4_HUMAN Isoform 2 of Serine/threonine-protein kinase PAK 4 OS=Homo sapiens GN=PAK4;>sp O96013 PAK4_HUMAN Serine/t | 7.90E-11  |         |
| O96013;A8K724;O96013-  | PAK4_HUMAN Serine/threonine-protein kinase PAK 4 OS=Homo sapiens GN=PAK4 PE=1 SV=1;>tr A8K724 A8K724_HUMAN cDNA FL     | 6.72E-11  |         |
| O96019                 | ACL6A_HUMAN Actin-like protein 6A OS=Homo sapiens GN=ACTL6A PE=1 SV=1                                                  |           | 102.65  |
| O96019-2               | ACL6A_HUMAN Isoform 2 of Actin-like protein 6A OS=Homo sapiens GN=ACTL6A                                               |           | 102.65  |
| O96019;O96019-2        | ACL6A_HUMAN Actin-like protein 6A OS=Homo sapiens GN=ACTL6A PE=1 SV=1;>sp O96019-2 ACL6A_HUMAN Isoform 2 of Actin-lik  | 3.48E-86  |         |
| P00156                 | CYB_HUMAN Cytochrome b OS=Homo sapiens GN=MT-CYB PE=1 SV=1                                                             |           |         |
| P00167                 | CYB5_HUMAN Cytochrome b5 OS=Homo sapiens GN=CYB5A PE=1 SV=2                                                            |           |         |
| P00167-2               | CYB5_HUMAN Isoform 2 of Cytochrome b5 OS=Homo sapiens GN=CYB5A                                                         |           |         |
| P00167;P00167-2        | CYB5_HUMAN Cytochrome b5 OS=Homo sapiens GN=CYB5A PE=1 SV=2;>sp P00167-2 CYB5_HUMAN Isoform 2 of Cytochrome b5 O       | 9.55E-31  |         |
| P00325;A8MYN5;B4DVC3;  | ADH1B_HUMAN Alcohol dehydrogenase 1B OS=Homo sapiens GN=ADH1B PE=1 SV=2;>tr A8MYN5 A8MYN5_HUMAN Uncharacterized        | 1.04E-244 |         |
| P00338                 | LDHA_HUMAN L-lactate dehydrogenase A chain OS=Homo sapiens GN=LDHA PE=1 SV=2                                           |           | 1382.58 |
| P00338-2               | LDHA_HUMAN Isoform 2 of L-lactate dehydrogenase A chain OS=Homo sapiens GN=LDHA                                        |           | 1165.53 |
| P00338;P00338-2        | LDHA_HUMAN L-lactate dehydrogenase A chain OS=Homo sapiens GN=LDHA PE=1 SV=2;>sp P00338-2 LDHA_HUMAN Isoform 2 of L    | 0         |         |
| P00352                 | AL1A1_HUMAN Retinal dehydrogenase 1 OS=Homo sapiens GN=ALDH1A1 PE=1 SV=2                                               |           | 78.41   |
| P00367                 | DHE3_HUMAN Glutamate dehydrogenase 1, mitochondrial OS=Homo sapiens GN=GLUD1 PE=1 SV=2                                 |           | 859.77  |
| P00374                 | DYR_HUMAN Dihydrofolate reductase OS=Homo sapiens GN=DHFR PE=1 SV=2                                                    | 2.74E-31  |         |
| P00387                 | NB5R3_HUMAN NADH-cytochrome b5 reductase 3 OS=Homo sapiens GN=CYB5R3 PE=1 SV=3                                         |           | 610.07  |
| P00387-2               | NB5R3_HUMAN Isoform 2 of NADH-cytochrome b5 reductase 3 OS=Homo sapiens GN=CYB5R3                                      |           | 610.07  |
| P00387;P00387-2        | NB5R3_HUMAN NADH-cytochrome b5 reductase 3 OS=Homo sapiens GN=CYB5R3 PE=1 SV=3;>sp P00387-2 NB5R3_HUMAN Isoform        | 1.58E-22  |         |
| P00390;P00390-2        | GSHR_HUMAN Glutathione reductase, mitochondrial OS=Homo sapiens GN=GSR PE=1 SV=2;>sp P00390-2 GSHR_HUMAN Isoform C     | 8.22E-51  |         |
| P00395                 | COX1_HUMAN Cytochrome c oxidase subunit 1 OS=Homo sapiens GN=MT-CO1 PE=1 SV=1                                          | 2.06E-14  |         |
| P00403                 | COX2_HUMAN Cytochrome c oxidase subunit 2 OS=Homo sapiens GN=MT-CO2 PE=1 SV=1                                          |           | 449.9   |
| P00441                 | SODC_HUMAN Superoxide dismutase [Cu-Zn] OS=Homo sapiens GN=SOD1 PE=1 SV=2                                              |           | 216.39  |
| P00450                 | CERU_HUMAN Ceruloplasmin OS=Homo sapiens GN=CP PE=1 SV=1                                                               |           | 188.2   |
| P00488                 | F13A_HUMAN Coagulation factor XIII A chain OS=Homo sapiens GN=F13A1 PE=1 SV=4                                          | 6.15E-50  |         |
| P00491                 | PNPH_HUMAN Purine nucleoside phosphorylase OS=Homo sapiens GN=PNP PE=1 SV=2                                            |           | 313.82  |
| P00492                 | HPRT_HUMAN Hypoxanthine-guanine phosphoribosyltransferase OS=Homo sapiens GN=HPRT1 PE=1 SV=2                           |           | 178.89  |
| P00505                 | AATM_HUMAN Aspartate aminotransferase, mitochondrial OS=Homo sapiens GN=GOT2 PE=1 SV=3                                 |           | 1073.24 |
| P00533                 | EGFR_HUMAN Epidermal growth factor receptor OS=Homo sapiens GN=EGFR PE=1 SV=2                                          |           | 684.32  |
| P00533-2               | EGFR_HUMAN Isoform 2 of Epidermal growth factor receptor OS=Homo sapiens GN=EGFR                                       |           | 389.54  |
| P00533-3               | EGFR_HUMAN Isoform 3 of Epidermal growth factor receptor OS=Homo sapiens GN=EGFR                                       |           | 444.83  |
| P00533-4               | EGFR_HUMAN Isoform 4 of Epidermal growth factor receptor OS=Homo sapiens GN=EGFR                                       |           | 444.83  |
| P00533;P00533-3;P00533 | EGFR_HUMAN Epidermal growth factor receptor OS=Homo sapiens GN=EGFR PE=1 SV=2;>sp P00533-3 EGFR_HUMAN Isoform 3 of E   | 8.04E-172 |         |
| P00558                 | PGK1_HUMAN Phosphoglycerate kinase 1 OS=Homo sapiens GN=PGK1 PE=1 SV=3                                                 |           | 1385.17 |
| P00568                 | KAD1_HUMAN Adenylate kinase isoenzyme 1 OS=Homo sapiens GN=AK1 PE=1 SV=3                                               |           | 119.49  |
| P00734                 | THRB_HUMAN Prothrombin OS=Homo sapiens GN=F2 PE=1 SV=2                                                                 | 0         |         |
| P00736                 | C1R_HUMAN Complement C1r subcomponent OS=Homo sapiens GN=C1R PE=1 SV=2                                                 | 2.52E-96  |         |
| P00738                 | HPT_HUMAN Haptoglobin OS=Homo sapiens GN=HP PE=1 SV=1                                                                  |           | 469.73  |
| P00739                 | HPTR_HUMAN Haptoglobin-related protein OS=Homo sapiens GN=HPR PE=1 SV=2                                                |           | 282.05  |
| P00739-2               | HPTR_HUMAN Isoform 2 of Haptoglobin-related protein OS=Homo sapiens GN=HPR                                             |           | 268.1   |
| P00739-2;P00739        | 2 HPTR_HUMAN Isoform 2 of Haptoglobin-related protein OS=Homo sapiens GN=HPR;>sp P00739 HPTR_HUMAN Haptoglobin-related | 6.98E-290 |         |
| P00742                 | FA10_HUMAN Coagulation factor X OS=Homo sapiens GN=F10 PE=1 SV=2                                                       | 8.97E-14  |         |
| P00746                 | CFAD_HUMAN Complement factor D OS=Homo sapiens GN=CFD PE=1 SV=5                                                        | 2.26E-11  |         |
| P00747                 | PLMN_HUMAN Plasminogen OS=Homo sapiens GN=PLG PE=1 SV=2                                                                |           | 138.3   |
| P00748                 | FA12_HUMAN Coagulation factor XII OS=Homo sapiens GN=F12 PE=1 SV=3                                                     | 2.94E-83  |         |
| P00749                 | UROK_HUMAN Urokinase-type plasminogen activator OS=Homo sapiens GN=PLAU PE=1 SV=2                                      |           | 119.46  |
| P00749-2               | UROK_HUMAN Isoform 2 of Urokinase-type plasminogen activator OS=Homo sapiens GN=PLAU                                   |           | 119.46  |

|                        |                                                                                                                         |           |         |
|------------------------|-------------------------------------------------------------------------------------------------------------------------|-----------|---------|
| P00751                 | CFAB_HUMAN Complement factor B OS=Homo sapiens GN=CFB PE=1 SV=2                                                         |           | 221.22  |
| P00751-2               | CFAB_HUMAN Isoform 2 of Complement factor B OS=Homo sapiens GN=CFB                                                      |           | 79.42   |
| P00813                 | ADA_HUMAN Adenosine deaminase OS=Homo sapiens GN=ADA PE=1 SV=3                                                          | 3.30E-10  |         |
| P00846                 | ATP6_HUMAN ATP synthase subunit a OS=Homo sapiens GN=MT-ATP6 PE=1 SV=1                                                  |           | 63.05   |
| P00915                 | CAH1_HUMAN Carbonic anhydrase 1 OS=Homo sapiens GN=CA1 PE=1 SV=2                                                        |           | 179.57  |
| P00918                 | CAH2_HUMAN Carbonic anhydrase 2 OS=Homo sapiens GN=CA2 PE=1 SV=2                                                        |           | 43.23   |
| P00966                 | ASSY_HUMAN Argininosuccinate synthase OS=Homo sapiens GN=ASS1 PE=1 SV=2                                                 | 7.98E-236 |         |
| P00973-3;P00973;P00973 | 3 OAS1_HUMAN Isoform p48 of 2-5-oligoadenylate synthase 1 OS=Homo sapiens GN=OAS1;>sp P00973 OAS1_HUMAN 2-5-oligoade    | 4.97E-08  |         |
| P01008                 | ANT3_HUMAN Antithrombin-III OS=Homo sapiens GN=SERPINC1 PE=1 SV=1                                                       |           | 137.91  |
| P01009                 | A1AT_HUMAN Alpha-1-antitrypsin OS=Homo sapiens GN=SERPINA1 PE=1 SV=3                                                    |           | 562.84  |
| P01009-2               | A1AT_HUMAN Isoform 2 of Alpha-1-antitrypsin OS=Homo sapiens GN=SERPINA1                                                 |           | 515.76  |
| P01009-3               | A1AT_HUMAN Isoform 3 of Alpha-1-antitrypsin OS=Homo sapiens GN=SERPINA1                                                 |           | 417.52  |
| P01009;P01009-2;P01009 | A1AT_HUMAN Alpha-1-antitrypsin OS=Homo sapiens GN=SERPINA1 PE=1 SV=3;>sp P01009-2 A1AT_HUMAN Isoform 2 of Alpha-1-ai    | 0         |         |
| P01011                 | AACT_HUMAN Alpha-1-antichymotrypsin OS=Homo sapiens GN=SERPINA3 PE=1 SV=2                                               |           | 156.84  |
| P01011-2               | AACT_HUMAN Isoform 2 of Alpha-1-antichymotrypsin OS=Homo sapiens GN=SERPINA3                                            |           | 23.72   |
| P01019                 | ANGT_HUMAN Angiotensinogen OS=Homo sapiens GN=AGT PE=1 SV=1                                                             |           | 137.5   |
| P01023                 | A2MG_HUMAN Alpha-2-macroglobulin OS=Homo sapiens GN=A2M PE=1 SV=3                                                       |           | 1505.35 |
| P01024                 | CO3_HUMAN Complement C3 OS=Homo sapiens GN=C3 PE=1 SV=2                                                                 |           | 971.81  |
| P01031                 | CO5_HUMAN Complement C5 OS=Homo sapiens GN=C5 PE=1 SV=4                                                                 |           |         |
| P01033                 | TIMP1_HUMAN Metalloproteinase inhibitor 1 OS=Homo sapiens GN=TIMP1 PE=1 SV=1                                            |           | 53.19   |
| P01034                 | CYTC_HUMAN Cystatin-C OS=Homo sapiens GN=CST3 PE=1 SV=1                                                                 |           | 120.36  |
| P01036                 | CYTS_HUMAN Cystatin-S OS=Homo sapiens GN=CST4 PE=1 SV=3                                                                 |           | 165.92  |
| P01037                 | CYTN_HUMAN Cystatin-SN OS=Homo sapiens GN=CST1 PE=1 SV=3                                                                |           | 160.37  |
| P01040                 | CYTA_HUMAN Cystatin-A OS=Homo sapiens GN=CSTA PE=1 SV=1                                                                 | 8.96E-13  |         |
| P01042                 | KNG1_HUMAN Kininogen-1 OS=Homo sapiens GN=KNG1 PE=1 SV=2                                                                |           | 73.85   |
| P01042-2               | KNG1_HUMAN Isoform LMW of Kininogen-1 OS=Homo sapiens GN=KNG1                                                           |           | 142.48  |
| P01106                 | MYC_HUMAN Myc proto-oncogene protein OS=Homo sapiens GN=MYC PE=1 SV=1                                                   |           |         |
| P01106-2               | MYC_HUMAN Isoform 2 of Myc proto-oncogene protein OS=Homo sapiens GN=MYC                                                |           |         |
| P01111                 | RASN_HUMAN GTPase NRas OS=Homo sapiens GN=NRAS PE=1 SV=1                                                                |           | 342.05  |
| P01112                 | RASH_HUMAN GTPase HRas OS=Homo sapiens GN=HRAS PE=1 SV=1                                                                |           | 383.61  |
| P01112-2               | RASH_HUMAN Isoform 2 of GTPase HRas OS=Homo sapiens GN=HRAS                                                             |           | 300.81  |
| P01112;P01112-2        | RASH_HUMAN GTPase HRas OS=Homo sapiens GN=HRAS PE=1 SV=1;>sp P01112-2 RASH_HUMAN Isoform 2 of GTPase HRas OS=H          | 1.72E-40  |         |
| P01116                 | RASK_HUMAN GTPase KRas OS=Homo sapiens GN=KRAS PE=1 SV=1                                                                |           | 299.68  |
| P01116-2               | RASK_HUMAN Isoform 2B of GTPase KRas OS=Homo sapiens GN=KRAS                                                            |           | 338.66  |
| P01116-2;P01116        | 2 RASK_HUMAN Isoform 2B of GTPase KRas OS=Homo sapiens GN=KRAS;>sp P01116 RASK_HUMAN GTPase KRas OS=Homo sapien:        | 2.34E-33  |         |
| P01130                 | LDLR_HUMAN Low-density lipoprotein receptor OS=Homo sapiens GN=LDLR PE=1 SV=1                                           |           | 113.36  |
| P01213                 | PDYN_HUMAN Proenkephalin-B OS=Homo sapiens GN=PDYN PE=1 SV=1                                                            |           |         |
| P01344                 | IGF2_HUMAN Insulin-like growth factor II OS=Homo sapiens GN=IGF2 PE=1 SV=1                                              |           | 14.45   |
| P01344-2               | IGF2_HUMAN Isoform 2 of Insulin-like growth factor II OS=Homo sapiens GN=IGF2                                           |           | 14.45   |
| P01591                 | IGJ_HUMAN Immunoglobulin J chain OS=Homo sapiens GN=IGJ PE=1 SV=4                                                       | 5.13E-18  |         |
| P01594                 | KV102_HUMAN Ig kappa chain V-I region AU OS=Homo sapiens PE=1 SV=1                                                      | 4.82E-193 |         |
| P01596                 | KV104_HUMAN Ig kappa chain V-I region CAR OS=Homo sapiens PE=1 SV=1                                                     |           | 75.44   |
| P01598                 | KV106_HUMAN Ig kappa chain V-I region EU OS=Homo sapiens PE=1 SV=1                                                      |           | 75.44   |
| P01602                 | KV110_HUMAN Ig kappa chain V-I region HK102 (Fragment) OS=Homo sapiens GN=IGKV1-5 PE=4 SV=1                             | 4.64E-08  |         |
| P01608;P01593;P01599;P | KV116_HUMAN Ig kappa chain V-I region Roy OS=Homo sapiens PE=1 SV=1;>sp P01593 KV101_HUMAN Ig kappa chain V-I region A  | 1.45E-208 |         |
| P01609                 | KV117_HUMAN Ig kappa chain V-I region Scw OS=Homo sapiens PE=1 SV=1                                                     | 6.57E-192 |         |
| P01611                 | KV119_HUMAN Ig kappa chain V-I region Wes OS=Homo sapiens PE=1 SV=1                                                     | 7.86E-112 |         |
| P01612                 | KV120_HUMAN Ig kappa chain V-I region Mev OS=Homo sapiens PE=1 SV=1                                                     | 1.93E-54  |         |
| P01613                 | KV121_HUMAN Ig kappa chain V-I region Ni OS=Homo sapiens PE=1 SV=1                                                      |           | 38.14   |
| P01619                 | KV301_HUMAN Ig kappa chain V-III region B6 OS=Homo sapiens PE=1 SV=1                                                    |           | 58.74   |
| P01620                 | KV302_HUMAN Ig kappa chain V-III region SIE OS=Homo sapiens PE=1 SV=1                                                   |           | 56.99   |
| P01621                 | KV303_HUMAN Ig kappa chain V-III region NG9 (Fragment) OS=Homo sapiens PE=1 SV=1                                        | 2.13E-19  |         |
| P01622                 | KV304_HUMAN Ig kappa chain V-III region Ti OS=Homo sapiens PE=1 SV=1                                                    |           | 56.99   |
| P01623                 | KV305_HUMAN Ig kappa chain V-III region WOL OS=Homo sapiens PE=1 SV=1                                                   |           | 56.99   |
| P01625                 | KV402_HUMAN Ig kappa chain V-IV region Len OS=Homo sapiens PE=1 SV=2                                                    | 9.21E-175 |         |
| P01700;P04208          | LV102_HUMAN Ig lambda chain V-I region HA OS=Homo sapiens PE=1 SV=1;>sp P04208 LV106_HUMAN Ig lambda chain V-I region ' | 9.08E-26  |         |
| P01714                 | LV301_HUMAN Ig lambda chain V-III region SH OS=Homo sapiens PE=1 SV=1                                                   | 1.11E-121 |         |
| P01717                 | LV403_HUMAN Ig lambda chain V-IV region Hil OS=Homo sapiens PE=1 SV=1                                                   | 1.31E-86  |         |
| P01743                 | HV102_HUMAN Ig heavy chain V-I region HG3 OS=Homo sapiens PE=4 SV=1                                                     | 3.03E-29  |         |
| P01763                 | HV302_HUMAN Ig heavy chain V-III region WEA OS=Homo sapiens PE=1 SV=1                                                   |           |         |
| P01764                 | HV303_HUMAN Ig heavy chain V-III region VH26 OS=Homo sapiens PE=1 SV=1                                                  | 5.20E-136 |         |

|                             |                                                                                                                          |           |         |
|-----------------------------|--------------------------------------------------------------------------------------------------------------------------|-----------|---------|
| P01765;P01774;P01776        | HV304_HUMAN Ig heavy chain V-III region TIL OS=Homo sapiens PE=1 SV=1;>sp P01774 HV313_HUMAN Ig heavy chain V-III region | 1.24E-245 |         |
| P01766;P01777;P01767;P01771 | HV305_HUMAN Ig heavy chain V-III region BRO OS=Homo sapiens PE=1 SV=1;>sp P01777 HV316_HUMAN Ig heavy chain V-III region | 9.04E-285 |         |
| P01779                      | HV310_HUMAN Ig heavy chain V-III region HIL OS=Homo sapiens PE=1 SV=1                                                    | 1.96E-05  |         |
| P01781                      | HV318_HUMAN Ig heavy chain V-III region TUR OS=Homo sapiens PE=1 SV=1                                                    | 2.19E-130 |         |
| P01833                      | HV320_HUMAN Ig heavy chain V-III region GAL OS=Homo sapiens PE=1 SV=1                                                    | 1.88E-33  |         |
| P01834                      | PIGR_HUMAN Polymeric immunoglobulin receptor OS=Homo sapiens GN=PIGR PE=1 SV=4                                           | 2.72E-137 |         |
| P01857                      | IGKC_HUMAN Ig kappa chain C region OS=Homo sapiens GN=IGKC PE=1 SV=1                                                     |           | 144.54  |
| P01859                      | IGHG1_HUMAN Ig gamma-1 chain C region OS=Homo sapiens GN=IGHG1 PE=1 SV=1                                                 |           | 352.81  |
| P01860                      | IGHG2_HUMAN Ig gamma-2 chain C region OS=Homo sapiens GN=IGHG2 PE=1 SV=2                                                 |           | 74.57   |
| P01861                      | IGHG3_HUMAN Ig gamma-3 chain C region OS=Homo sapiens GN=IGHG3 PE=1 SV=2                                                 |           | 256.42  |
| P01871                      | IGHG4_HUMAN Ig gamma-4 chain C region OS=Homo sapiens GN=IGHG4 PE=1 SV=1                                                 |           | 231.36  |
| P01871-2                    | IGHM_HUMAN Ig mu chain C region OS=Homo sapiens GN=IGHM PE=1 SV=3                                                        |           | 385.13  |
| P01871-2;P01871             | IGHM_HUMAN Isoform 2 of Ig mu chain C region OS=Homo sapiens GN=IGHM                                                     |           | 385.13  |
| P01876                      | 2 IGHM_HUMAN Isoform 2 of Ig mu chain C region OS=Homo sapiens GN=IGHM;>sp P01871 IGHM_HUMAN Ig mu chain C region OS     | 0         |         |
| P01877                      | IGHA1_HUMAN Ig alpha-1 chain C region OS=Homo sapiens GN=IGHA1 PE=1 SV=2                                                 |           |         |
| P01880-2;P01880             | IGHA2_HUMAN Ig alpha-2 chain C region OS=Homo sapiens GN=IGHA2 PE=1 SV=3                                                 |           |         |
| P01889                      | 2 IGHD_HUMAN Isoform 2 of Ig delta chain C region OS=Homo sapiens GN=IGHD;>sp P01880 IGHD_HUMAN Ig delta chain C region  | 3.53E-17  |         |
| P01891                      | 1B07_HUMAN HLA class I histocompatibility antigen, B-7 alpha chain OS=Homo sapiens GN=HLA-B PE=1 SV=3                    |           | 430.5   |
| P01892                      | 1A68_HUMAN HLA class I histocompatibility antigen, A-68 alpha chain OS=Homo sapiens GN=HLA-A PE=1 SV=4                   |           | 817.83  |
| P01893                      | 1A02_HUMAN HLA class I histocompatibility antigen, A-2 alpha chain OS=Homo sapiens GN=HLA-A PE=1 SV=1                    |           | 1465.4  |
| P01903                      | HLAH_HUMAN Putative HLA class I histocompatibility antigen, alpha chain H OS=Homo sapiens GN=HLA-H PE=5 SV=3             |           | 164.13  |
| P01906                      | DRA_HUMAN HLA class II histocompatibility antigen, DR alpha chain OS=Homo sapiens GN=HLA-DRA PE=1 SV=1                   | 0         |         |
| P01909                      | DQA2_HUMAN HLA class II histocompatibility antigen, DQ alpha 2 chain OS=Homo sapiens GN=HLA-DQA2 PE=2 SV=2               | 1.79E-37  |         |
| P01911                      | DQA1_HUMAN HLA class II histocompatibility antigen, DQ alpha 1 chain OS=Homo sapiens GN=HLA-DQA1 PE=1 SV=1               | 1.31E-61  |         |
| P01912                      | 2B1F_HUMAN HLA class II histocompatibility antigen, DRB1-15 beta chain OS=Homo sapiens GN=HLA-DRB1 PE=1 SV=2             | 1.40E-154 |         |
| P01920                      | 2B13_HUMAN HLA class II histocompatibility antigen, DRB1-3 chain OS=Homo sapiens GN=HLA-DRB1 PE=1 SV=2                   |           | 0.15    |
| P02008                      | DQB1_HUMAN HLA class II histocompatibility antigen, DQ beta 1 chain OS=Homo sapiens GN=HLA-DQB1 PE=1 SV=2                | 1.04E-123 |         |
| P02042                      | HBAZ_HUMAN Hemoglobin subunit zeta OS=Homo sapiens GN=HBZ PE=1 SV=2                                                      |           | 5.44    |
| P02100                      | HBD_HUMAN Hemoglobin subunit delta OS=Homo sapiens GN=HBD PE=1 SV=2                                                      |           | 761.15  |
| P02144                      | HBE_HUMAN Hemoglobin subunit epsilon OS=Homo sapiens GN=HBE1 PE=1 SV=2                                                   |           | 78.42   |
| P02452                      | MYG_HUMAN Myoglobin OS=Homo sapiens GN=MB PE=1 SV=2                                                                      | 3.70E-12  |         |
| P02461                      | CO1A1_HUMAN Collagen alpha-1(I) chain OS=Homo sapiens GN=COL1A1 PE=1 SV=5                                                |           | 40.2    |
| P02461-2                    | CO3A1_HUMAN Collagen alpha-1(III) chain OS=Homo sapiens GN=COL3A1 PE=1 SV=4                                              |           | 39.77   |
| P02462;P02462-2             | CO3A1_HUMAN Isoform 2 of Collagen alpha-1(III) chain OS=Homo sapiens GN=COL3A1                                           |           | 2.6     |
| P02511                      | CO4A1_HUMAN Collagen alpha-1(IV) chain OS=Homo sapiens GN=COL4A1 PE=1 SV=3;>sp P02462-2 CO4A1_HUMAN Isoform 2 of C       | 8.82E-204 |         |
| P02533                      | CRYAB_HUMAN Alpha-crystallin B chain OS=Homo sapiens GN=CRYAB PE=1 SV=2                                                  | 1.24E-85  |         |
| P02538                      | K1C14_HUMAN Keratin, type I cytoskeletal 14 OS=Homo sapiens GN=KRT14 PE=1 SV=4                                           |           | 1018.81 |
| P02545                      | K2C6A_HUMAN Keratin, type II cytoskeletal 6A OS=Homo sapiens GN=KRT6A PE=1 SV=3                                          |           | 1074.76 |
| P02545-2                    | LMNA_HUMAN Prelamin-A/C OS=Homo sapiens GN=LMNA PE=1 SV=1                                                                |           | 1879.38 |
| P02545-3                    | LMNA_HUMAN Isoform C of Prelamin-A/C OS=Homo sapiens GN=LMNA                                                             |           | 1838.8  |
| P02545;P02545-2;P02545      | LMNA_HUMAN Isoform ADelta10 of Prelamin-A/C OS=Homo sapiens GN=LMNA                                                      |           | 1879.38 |
| P02549;P02549-2             | LMNA_HUMAN Prelamin-A/C OS=Homo sapiens GN=LMNA PE=1 SV=1;>sp P02545-2 LMNA_HUMAN Isoform C of Prelamin-A/C OS=H         | 1.64E-222 |         |
| P02585                      | SPTA1_HUMAN Spectrin alpha chain, erythrocyte OS=Homo sapiens GN=SPTA1 PE=1 SV=5;>sp P02549-2 SPTA1_HUMAN Isoform 2 (    | 9.87E-11  |         |
| P02647                      | TNNC2_HUMAN Troponin C, skeletal muscle OS=Homo sapiens GN=TNNC2 PE=1 SV=2                                               |           |         |
| P02649                      | APOA1_HUMAN Apolipoprotein A-I OS=Homo sapiens GN=APOA1 PE=1 SV=1                                                        |           | 407.94  |
| P02652                      | APOE_HUMAN Apolipoprotein E OS=Homo sapiens GN=APOE PE=1 SV=1                                                            |           |         |
| P02656                      | APOA2_HUMAN Apolipoprotein A-II OS=Homo sapiens GN=APOA2 PE=1 SV=1                                                       |           | 189     |
| P02671                      | APOC3_HUMAN Apolipoprotein C-III OS=Homo sapiens GN=APOC3 PE=1 SV=1                                                      |           | 45.9    |
| P02671-2                    | FIBA_HUMAN Fibrinogen alpha chain OS=Homo sapiens GN=FGA PE=1 SV=2                                                       |           | 414.69  |
| P02671;P02671-2             | FIBA_HUMAN Isoform 2 of Fibrinogen alpha chain OS=Homo sapiens GN=FGA                                                    |           | 414.69  |
| P02675                      | FIBA_HUMAN Fibrinogen alpha chain OS=Homo sapiens GN=FGA PE=1 SV=2;>sp P02671-2 FIBA_HUMAN Isoform 2 of Fibrinogen alp   | 0         |         |
| P02679                      | FIBB_HUMAN Fibrinogen beta chain OS=Homo sapiens GN=FGB PE=1 SV=2                                                        |           | 438.39  |
| P02679-2                    | FIBG_HUMAN Fibrinogen gamma chain OS=Homo sapiens GN=FGG PE=1 SV=3                                                       |           | 322.86  |
| P02679;P02679-2             | FIBG_HUMAN Isoform Gamma-A of Fibrinogen gamma chain OS=Homo sapiens GN=FGG                                              |           | 322.86  |
| P02686                      | FIBG_HUMAN Fibrinogen gamma chain OS=Homo sapiens GN=FGG PE=1 SV=3;>sp P02679-2 FIBG_HUMAN Isoform Gamma-A of Fit        | 1.20E-09  |         |
| P02686-2                    | MBP_HUMAN Myelin basic protein OS=Homo sapiens GN=MBP PE=1 SV=3                                                          |           | 41.64   |
| P02686-3                    | MBP_HUMAN Isoform 2 of Myelin basic protein OS=Homo sapiens GN=MBP                                                       |           | 40.35   |
| P02686-4                    | MBP_HUMAN Isoform 3 of Myelin basic protein OS=Homo sapiens GN=MBP                                                       |           | 41.64   |
| P02686-5                    | MBP_HUMAN Isoform 4 of Myelin basic protein OS=Homo sapiens GN=MBP                                                       |           | 41.64   |
| P02686-6                    | MBP_HUMAN Isoform 5 of Myelin basic protein OS=Homo sapiens GN=MBP                                                       |           | 41.64   |
|                             | MBP_HUMAN Isoform 6 of Myelin basic protein OS=Homo sapiens GN=MBP                                                       |           | 41.64   |



|                             |                                                                                                                                                                                                  |                      |         |
|-----------------------------|--------------------------------------------------------------------------------------------------------------------------------------------------------------------------------------------------|----------------------|---------|
| P02686-7                    | MBP_HUMAN Isoform 7 of Myelin basic protein OS=Homo sapiens GN=MBP                                                                                                                               |                      | 40.35   |
| P02686;A6NP45;B7Z3Y6;P02730 | MBP_HUMAN Myelin basic protein OS=Homo sapiens GN=MBP PE=1 SV=3;>tr A6NP45 A6NP45_HUMAN Uncharacterized protein OS=B3AT_HUMAN Band 3 anion transport protein OS=Homo sapiens GN=SLC4A1 PE=1 SV=3 | 9.49E-06<br>2.47E-15 |         |
| P02735                      | SAA_HUMAN Serum amyloid A protein OS=Homo sapiens GN=SAA1 PE=1 SV=2                                                                                                                              |                      | 39.01   |
| P02743                      | SAMP_HUMAN Serum amyloid P-component OS=Homo sapiens GN=APCS PE=1 SV=2                                                                                                                           |                      |         |
| P02745                      | C1QA_HUMAN Complement C1q subcomponent subunit A OS=Homo sapiens GN=C1QA PE=1 SV=2                                                                                                               | 1.88E-05             |         |
| P02746                      | C1QB_HUMAN Complement C1q subcomponent subunit B OS=Homo sapiens GN=C1QB PE=1 SV=3                                                                                                               | 4.13E-102            |         |
| P02747                      | C1QC_HUMAN Complement C1q subcomponent subunit C OS=Homo sapiens GN=C1QC PE=1 SV=3                                                                                                               |                      | 76.81   |
| P02748                      | CO9_HUMAN Complement component C9 OS=Homo sapiens GN=C9 PE=1 SV=2                                                                                                                                |                      | 36.78   |
| P02749                      | APOH_HUMAN Beta-2-glycoprotein 1 OS=Homo sapiens GN=APOH PE=1 SV=3                                                                                                                               |                      | 81.82   |
| P02750                      | A2GL_HUMAN Leucine-rich alpha-2-glycoprotein OS=Homo sapiens GN=LRG1 PE=1 SV=2                                                                                                                   | 3.11E-77             |         |
| P02751                      | FINC_HUMAN Fibronectin OS=Homo sapiens GN=FN1 PE=1 SV=4                                                                                                                                          |                      | 117.63  |
| P02751-10                   | FINC_HUMAN Isoform 10 of Fibronectin OS=Homo sapiens GN=FN1                                                                                                                                      |                      | 117.63  |
| P02751-11                   | FINC_HUMAN Isoform 11 of Fibronectin OS=Homo sapiens GN=FN1                                                                                                                                      |                      | 79.03   |
| P02751-12                   | FINC_HUMAN Isoform 12 of Fibronectin OS=Homo sapiens GN=FN1                                                                                                                                      |                      | 77.83   |
| P02751-13                   | FINC_HUMAN Isoform 13 of Fibronectin OS=Homo sapiens GN=FN1                                                                                                                                      |                      | 117.63  |
| P02751-14                   | FINC_HUMAN Isoform 14 of Fibronectin OS=Homo sapiens GN=FN1                                                                                                                                      |                      | 117.63  |
| P02751-15                   | FINC_HUMAN Isoform 15 of Fibronectin OS=Homo sapiens GN=FN1                                                                                                                                      |                      | 117.63  |
| P02751-15;P02751-7;P02751-3 | FINC_HUMAN Isoform 15 of Fibronectin OS=Homo sapiens GN=FN1;>sp P02751-7 FINC_HUMAN Isoform 7 of Fibronectin OS=Homo sapiens GN=FN1                                                              | 1.20E-98             |         |
| P02751-3                    | FINC_HUMAN Isoform 3 of Fibronectin OS=Homo sapiens GN=FN1                                                                                                                                       |                      | 117.63  |
| P02751-4                    | FINC_HUMAN Isoform 4 of Fibronectin OS=Homo sapiens GN=FN1                                                                                                                                       |                      | 117.63  |
| P02751-5                    | FINC_HUMAN Isoform 5 of Fibronectin OS=Homo sapiens GN=FN1                                                                                                                                       |                      | 117.63  |
| P02751-6                    | FINC_HUMAN Isoform 6 of Fibronectin OS=Homo sapiens GN=FN1                                                                                                                                       |                      | 117.63  |
| P02751-7                    | FINC_HUMAN Isoform 7 of Fibronectin OS=Homo sapiens GN=FN1                                                                                                                                       |                      | 117.63  |
| P02751-8                    | FINC_HUMAN Isoform 8 of Fibronectin OS=Homo sapiens GN=FN1                                                                                                                                       |                      | 117.63  |
| P02751-9                    | FINC_HUMAN Isoform 9 of Fibronectin OS=Homo sapiens GN=FN1                                                                                                                                       |                      | 117.63  |
| P02751;P02751-3;P02751-3    | FINC_HUMAN Fibronectin OS=Homo sapiens GN=FN1 PE=1 SV=4;>sp P02751-3 FINC_HUMAN Isoform 3 of Fibronectin OS=Homo sapiens GN=FN1                                                                  | 0                    |         |
| P02753                      | RET4_HUMAN Retinol-binding protein 4 OS=Homo sapiens GN=RBP4 PE=1 SV=3                                                                                                                           |                      | 65.86   |
| P02760                      | AMBP_HUMAN Protein AMBP OS=Homo sapiens GN=AMBP PE=1 SV=1                                                                                                                                        |                      | 59.37   |
| P02763                      | A1AG1_HUMAN Alpha-1-acid glycoprotein 1 OS=Homo sapiens GN=ORM1 PE=1 SV=1                                                                                                                        |                      | 40.8    |
| P02765                      | FETUA_HUMAN Alpha-2-HS-glycoprotein OS=Homo sapiens GN=AHSG PE=1 SV=1                                                                                                                            |                      | 185.05  |
| P02766                      | TTHY_HUMAN Transthyretin OS=Homo sapiens GN=TTR PE=1 SV=1                                                                                                                                        |                      | 131.53  |
| P02768                      | ALBU_HUMAN Serum albumin OS=Homo sapiens GN=ALB PE=1 SV=2                                                                                                                                        |                      | 3421.59 |
| P02768-2                    | ALBU_HUMAN Isoform 2 of Serum albumin OS=Homo sapiens GN=ALB                                                                                                                                     |                      | 2194.61 |
| P02774                      | VTDB_HUMAN Vitamin D-binding protein OS=Homo sapiens GN=GC PE=1 SV=1                                                                                                                             |                      | 225.87  |
| P02774-2                    | VTDB_HUMAN Isoform 2 of Vitamin D-binding protein OS=Homo sapiens GN=GC                                                                                                                          |                      | 225.87  |
| P02774;P02774-2             | VTDB_HUMAN Vitamin D-binding protein OS=Homo sapiens GN=GC PE=1 SV=1;>sp P02774-2 VTDB_HUMAN Isoform 2 of Vitamin D-binding protein OS=Homo sapiens GN=GC                                        | 0                    |         |
| P02786                      | TFR1_HUMAN Transferrin receptor protein 1 OS=Homo sapiens GN=TFRC PE=1 SV=2                                                                                                                      |                      | 1251.05 |
| P02787                      | TRFE_HUMAN Serotransferrin OS=Homo sapiens GN=TF PE=1 SV=3                                                                                                                                       |                      | 1054.12 |
| P02788                      | TRFL_HUMAN Lactotransferrin OS=Homo sapiens GN=LTF PE=1 SV=6                                                                                                                                     | 0                    |         |
| P02790                      | HEMO_HUMAN Hemopexin OS=Homo sapiens GN=HPX PE=1 SV=2                                                                                                                                            |                      | 47.26   |
| P02792                      | FRIL_HUMAN Ferritin light chain OS=Homo sapiens GN=FTL PE=1 SV=2                                                                                                                                 |                      | 219.36  |
| P02794                      | FRIH_HUMAN Ferritin heavy chain OS=Homo sapiens GN=FTH1 PE=1 SV=2                                                                                                                                |                      | 481.82  |
| P03372;P03372-2;P03372-2    | ESR1_HUMAN Estrogen receptor OS=Homo sapiens GN=ESR1 PE=1 SV=2;>sp P03372-2 ESR1_HUMAN Isoform 2 of Estrogen receptor OS=Homo sapiens GN=ESR1                                                    | 0.0001966            |         |
| P03886                      | NU1M_HUMAN NADH-ubiquinone oxidoreductase chain 1 OS=Homo sapiens GN=MT-ND1 PE=1 SV=1                                                                                                            |                      |         |
| P03897                      | NU3M_HUMAN NADH-ubiquinone oxidoreductase chain 3 OS=Homo sapiens GN=MT-ND3 PE=1 SV=1                                                                                                            |                      |         |
| P03905                      | NU4M_HUMAN NADH-ubiquinone oxidoreductase chain 4 OS=Homo sapiens GN=MT-ND4 PE=1 SV=1                                                                                                            |                      |         |
| P03950                      | ANGI_HUMAN Angiogenin OS=Homo sapiens GN=ANG PE=1 SV=1                                                                                                                                           | 9.84E-09             |         |
| P03951                      | FA11_HUMAN Coagulation factor XI OS=Homo sapiens GN=F11 PE=1 SV=1                                                                                                                                |                      |         |
| P03951-2                    | FA11_HUMAN Isoform 2 of Coagulation factor XI OS=Homo sapiens GN=F11                                                                                                                             |                      |         |
| P03952                      | KLKB1_HUMAN Plasma kallikrein OS=Homo sapiens GN=KLKB1 PE=1 SV=1                                                                                                                                 | 3.08E-33             |         |
| P03989                      | 1B27_HUMAN HLA class I histocompatibility antigen, B-27 alpha chain OS=Homo sapiens GN=HLA-B PE=1 SV=2                                                                                           |                      | 469.29  |
| P04003                      | C4BPA_HUMAN C4b-binding protein alpha chain OS=Homo sapiens GN=C4BPA PE=1 SV=2                                                                                                                   | 5.40E-154            |         |
| P04004                      | VTNC_HUMAN Vitronectin OS=Homo sapiens GN=VTN PE=1 SV=1                                                                                                                                          | 7.98E-54             |         |
| P04035                      | HMDH_HUMAN 3-hydroxy-3-methylglutaryl-coenzyme A reductase OS=Homo sapiens GN=HMGCR PE=1 SV=1                                                                                                    |                      |         |
| P04035-2                    | HMDH_HUMAN Isoform 2 of 3-hydroxy-3-methylglutaryl-coenzyme A reductase OS=Homo sapiens GN=HMGCR                                                                                                 |                      |         |
| P04040                      | CATA_HUMAN Catalase OS=Homo sapiens GN=CAT PE=1 SV=3                                                                                                                                             |                      | 182.34  |
| P04062                      | GLCM_HUMAN Glucosylceramidase OS=Homo sapiens GN=GBA PE=1 SV=3                                                                                                                                   |                      |         |
| P04062-2                    | GLCM_HUMAN Isoform Short of Glucosylceramidase OS=Homo sapiens GN=GBA                                                                                                                            |                      |         |
| P04062-3                    | GLCM_HUMAN Isoform 3 of Glucosylceramidase OS=Homo sapiens GN=GBA                                                                                                                                |                      |         |
| P04062;P04062-2             | GLCM_HUMAN Glucosylceramidase OS=Homo sapiens GN=GBA PE=1 SV=3;>sp P04062-2 GLCM_HUMAN Isoform Short of Glucosylceramidase OS=Homo sapiens GN=GBA                                                | 2.06E-05             |         |

|                             |                                                                                                                         |           |         |
|-----------------------------|-------------------------------------------------------------------------------------------------------------------------|-----------|---------|
| P04075                      | ALDOA_HUMAN Fructose-bisphosphate aldolase A OS=Homo sapiens GN=ALDOA PE=1 SV=2                                         |           | 1034.27 |
| P04080                      | CYTB_HUMAN Cystatin-B OS=Homo sapiens GN=CSTB PE=1 SV=2                                                                 |           | 154.42  |
| P04083                      | ANXA1_HUMAN Annexin A1 OS=Homo sapiens GN=ANXA1 PE=1 SV=2                                                               |           | 1065.67 |
| P04114                      | APOB_HUMAN Apolipoprotein B-100 OS=Homo sapiens GN=APOB PE=1 SV=2                                                       |           | 579.28  |
| P04150-3;B6ZGU6;D3DQF3      | GCR_HUMAN Isoform Alpha-2 of Glucocorticoid receptor OS=Homo sapiens GN=NR3C1;>tr B6ZGU6 B6ZGU6_HUMAN Glucocorticoid    | 5.49E-05  |         |
| P04155                      | TFF1_HUMAN Trefoil factor 1 OS=Homo sapiens GN=TFF1 PE=1 SV=1                                                           |           |         |
| P04156                      | PRIO_HUMAN Major prion protein OS=Homo sapiens GN=PRNP PE=1 SV=1                                                        |           | 207.48  |
| P04156-2                    | PRIO_HUMAN Isoform 2 of Major prion protein OS=Homo sapiens GN=PRNP                                                     |           | 207.48  |
| P04156;P04156-2             | PRIO_HUMAN Major prion protein OS=Homo sapiens GN=PRNP PE=1 SV=1;>sp P04156-2 PRIO_HUMAN Isoform 2 of Major prion pro   | 1.57E-59  |         |
| P04179                      | SODM_HUMAN Superoxide dismutase [Mn], mitochondrial OS=Homo sapiens GN=SOD2 PE=1 SV=2                                   |           | 345.74  |
| P04181                      | OAT_HUMAN Ornithine aminotransferase, mitochondrial OS=Homo sapiens GN=OAT PE=1 SV=1                                    |           | 314.67  |
| P04183                      | KITH_HUMAN Thymidine kinase, cytosolic OS=Homo sapiens GN=TK1 PE=1 SV=2                                                 | 1.67E-47  |         |
| P04196                      | HRG_HUMAN Histidine-rich glycoprotein OS=Homo sapiens GN=HRG PE=1 SV=1                                                  |           | 75.07   |
| P04206                      | KV307_HUMAN Ig kappa chain V-III region GOL OS=Homo sapiens PE=1 SV=1                                                   |           | 56.99   |
| P04207;P04434;P01624;P04216 | KV308_HUMAN Ig kappa chain V-III region CLL OS=Homo sapiens PE=1 SV=2;>sp P04434 KV310_HUMAN Ig kappa chain V-III regio | 5.26E-10  |         |
| P04217                      | THY1_HUMAN Thy-1 membrane glycoprotein OS=Homo sapiens GN=THY1 PE=1 SV=2                                                | 2.78E-93  |         |
| P04217-2                    | A1BG_HUMAN Isoform 2 of Alpha-1B-glycoprotein OS=Homo sapiens GN=A1BG                                                   |           | 112.24  |
| P04217;P04217-2             | A1BG_HUMAN Alpha-1B-glycoprotein OS=Homo sapiens GN=A1BG PE=1 SV=4;>sp P04217-2 A1BG_HUMAN Isoform 2 of Alpha-1B-g      | 0         | 26.53   |
| P04220                      | MUCB_HUMAN Ig mu heavy chain disease protein OS=Homo sapiens PE=1 SV=1                                                  |           | 309.78  |
| P04222                      | 1C03_HUMAN HLA class I histocompatibility antigen, Cw-3 alpha chain OS=Homo sapiens GN=HLA-C PE=1 SV=2                  |           | 323.82  |
| P04229                      | 2B11_HUMAN HLA class II histocompatibility antigen, DRB1-1 beta chain OS=Homo sapiens GN=HLA-DRB1 PE=1 SV=2             |           | 29.42   |
| P04233                      | HG2A_HUMAN HLA class II histocompatibility antigen gamma chain OS=Homo sapiens GN=CD74 PE=1 SV=3                        |           | 121.89  |
| P04233-2                    | HG2A_HUMAN Isoform 2 of HLA class II histocompatibility antigen gamma chain OS=Homo sapiens GN=CD74                     |           | 121.89  |
| P04233-2;P04233             | 2 HG2A_HUMAN Isoform 2 of HLA class II histocompatibility antigen gamma chain OS=Homo sapiens GN=CD74;>sp P04233 HG2A_H | 1.05E-111 |         |
| P04233-3                    | HG2A_HUMAN Isoform 3 of HLA class II histocompatibility antigen gamma chain OS=Homo sapiens GN=CD74                     |           | 84.75   |
| P04233;P04233-2             | HG2A_HUMAN HLA class II histocompatibility antigen gamma chain OS=Homo sapiens GN=CD74 PE=1 SV=3;>sp P04233-2 HG2A_HI   | 2.10E-10  |         |
| P04259                      | K2C6B_HUMAN Keratin, type II cytoskeletal 6B OS=Homo sapiens GN=KRT6B PE=1 SV=5                                         |           | 989.24  |
| P04264                      | K2C1_HUMAN Keratin, type II cytoskeletal 1 OS=Homo sapiens GN=KRT1 PE=1 SV=6                                            |           | 2663.38 |
| P04275                      | VWF_HUMAN von Willebrand factor OS=Homo sapiens GN=VWF PE=1 SV=4                                                        | 2.32E-48  |         |
| P04278;P04278-2;B0FWH       | SHBG_HUMAN Sex hormone-binding globulin OS=Homo sapiens GN=SHBG PE=1 SV=2;>sp P04278-2 SHBG_HUMAN Isoform 2 of Se       | 1.22E-08  |         |
| P04350                      | TBB4_HUMAN Tubulin beta-4 chain OS=Homo sapiens GN=TUBB4 PE=1 SV=2                                                      |           | 1886.18 |
| P04406                      | G3P_HUMAN Glyceraldehyde-3-phosphate dehydrogenase OS=Homo sapiens GN=GAPDH PE=1 SV=3                                   |           | 2232.02 |
| P04424                      | ARLY_HUMAN Argininosuccinate lyase OS=Homo sapiens GN=ASL PE=1 SV=4                                                     | 8.64E-32  |         |
| P04430                      | KV122_HUMAN Ig kappa chain V-I region BAN OS=Homo sapiens PE=1 SV=1                                                     | 1.21E-149 |         |
| P04433                      | KV309_HUMAN Ig kappa chain V-III region VG (Fragment) OS=Homo sapiens PE=1 SV=1                                         |           | 44.82   |
| P04439                      | 1A03_HUMAN HLA class I histocompatibility antigen, A-3 alpha chain OS=Homo sapiens GN=HLA-A PE=1 SV=2                   |           | 504.96  |
| P04440                      | DPB1_HUMAN HLA class II histocompatibility antigen, DP beta 1 chain OS=Homo sapiens GN=HLA-DPB1 PE=1 SV=1               | 4.23E-46  |         |
| P04626                      | ERBB2_HUMAN Receptor tyrosine-protein kinase erbB-2 OS=Homo sapiens GN=ERBB2 PE=1 SV=1                                  |           | 85.48   |
| P04626-2                    | ERBB2_HUMAN Isoform 2 of Receptor tyrosine-protein kinase erbB-2 OS=Homo sapiens GN=ERBB2                               |           | 83.09   |
| P04626-3                    | ERBB2_HUMAN Isoform 3 of Receptor tyrosine-protein kinase erbB-2 OS=Homo sapiens GN=ERBB2                               |           | 83.09   |
| P04626-4                    | ERBB2_HUMAN Isoform 4 of Receptor tyrosine-protein kinase erbB-2 OS=Homo sapiens GN=ERBB2                               |           | 85.48   |
| P04626;P04626-4;B4DTR       | ERBB2_HUMAN Receptor tyrosine-protein kinase erbB-2 OS=Homo sapiens GN=ERBB2 PE=1 SV=1;>sp P04626-4 ERBB2_HUMAN Iso     | 7.26E-32  |         |
| P04632                      | CPNS1_HUMAN Calpain small subunit 1 OS=Homo sapiens GN=CAPNS1 PE=1 SV=1                                                 |           | 604.95  |
| P04637                      | P53_HUMAN Cellular tumor antigen p53 OS=Homo sapiens GN=TP53 PE=1 SV=4                                                  |           | 83.7    |
| P04637-2                    | P53_HUMAN Isoform 2 of Cellular tumor antigen p53 OS=Homo sapiens GN=TP53                                               |           | 83.7    |
| P04637-3                    | P53_HUMAN Isoform 3 of Cellular tumor antigen p53 OS=Homo sapiens GN=TP53                                               |           | 83.7    |
| P04637-4                    | P53_HUMAN Isoform 4 of Cellular tumor antigen p53 OS=Homo sapiens GN=TP53                                               |           | 83.7    |
| P04637-5                    | P53_HUMAN Isoform 5 of Cellular tumor antigen p53 OS=Homo sapiens GN=TP53                                               |           | 83.7    |
| P04637-6                    | P53_HUMAN Isoform 6 of Cellular tumor antigen p53 OS=Homo sapiens GN=TP53                                               |           | 83.7    |
| P04637-7                    | P53_HUMAN Isoform 7 of Cellular tumor antigen p53 OS=Homo sapiens GN=TP53                                               |           | 37.37   |
| P04637-8                    | P53_HUMAN Isoform 8 of Cellular tumor antigen p53 OS=Homo sapiens GN=TP53                                               |           | 37.37   |
| P04637-9                    | P53_HUMAN Isoform 9 of Cellular tumor antigen p53 OS=Homo sapiens GN=TP53                                               |           | 37.37   |
| P04637;P04637-4;P04637      | P53_HUMAN Cellular tumor antigen p53 OS=Homo sapiens GN=TP53 PE=1 SV=4;>sp P04637-4 P53_HUMAN Isoform 4 of Cellular tu  | 2.45E-48  |         |
| P04745                      | AMY1_HUMAN Alpha-amylase 1 OS=Homo sapiens GN=AMY1A PE=1 SV=2                                                           | 2.71E-05  |         |
| P04792                      | HSPB1_HUMAN Heat shock protein beta-1 OS=Homo sapiens GN=HSPB1 PE=1 SV=2                                                |           | 589.72  |
| P04818                      | TYSY_HUMAN Thymidylate synthase OS=Homo sapiens GN=TYMS PE=1 SV=3                                                       | 3.48E-30  |         |
| P04839                      | CY24B_HUMAN Cytochrome b-245 heavy chain OS=Homo sapiens GN=CYBB PE=1 SV=2                                              | 2.78E-64  |         |
| P04843                      | RPN1_HUMAN Dolichyl-diphosphooligosaccharide--protein glycosyltransferase subunit 1 OS=Homo sapiens GN=RPN1 PE=1 SV=1   |           | 1012.05 |
| P04844                      | RPN2_HUMAN Dolichyl-diphosphooligosaccharide--protein glycosyltransferase subunit 2 OS=Homo sapiens GN=RPN2 PE=1 SV=3   |           | 1046.16 |
| P04899                      | GNAI2_HUMAN Guanine nucleotide-binding protein G(i) subunit alpha-2 OS=Homo sapiens GN=GNAI2 PE=1 SV=3                  |           | 1171.68 |

|                          |                                                                                                                         |            |         |
|--------------------------|-------------------------------------------------------------------------------------------------------------------------|------------|---------|
| P04899-2                 | GNAI2_HUMAN Isoform 2 of Guanine nucleotide-binding protein G(i) subunit alpha-2 OS=Homo sapiens GN=GNAI2               |            | 1099    |
| P04899;P04899-2          | GNAI2_HUMAN Guanine nucleotide-binding protein G(i) subunit alpha-2 OS=Homo sapiens GN=GNAI2 PE=1 SV=3;>sp P04899-2 GN. | 8.09E-190  |         |
| P04908                   | H2A1B_HUMAN Histone H2A type 1-B/E OS=Homo sapiens GN=HIST1H2AB PE=1 SV=2                                               |            | 212.14  |
| P05023                   | AT1A1_HUMAN Sodium/potassium-transporting ATPase subunit alpha-1 OS=Homo sapiens GN=ATP1A1 PE=1 SV=1                    |            | 2674.16 |
| P05023-2                 | AT1A1_HUMAN Isoform Short of Sodium/potassium-transporting ATPase subunit alpha-1 OS=Homo sapiens GN=ATP1A1             |            | 1594.29 |
| P05023;P05023-2          | AT1A1_HUMAN Sodium/potassium-transporting ATPase subunit alpha-1 OS=Homo sapiens GN=ATP1A1 PE=1 SV=1;>sp P05023-2 AT    | 0          |         |
| P05026                   | AT1B1_HUMAN Sodium/potassium-transporting ATPase subunit beta-1 OS=Homo sapiens GN=ATP1B1 PE=1 SV=1                     |            | 493.48  |
| P05026-2                 | AT1B1_HUMAN Isoform 2 of Sodium/potassium-transporting ATPase subunit beta-1 OS=Homo sapiens GN=ATP1B1                  |            | 493.48  |
| P05026;P05026-2          | AT1B1_HUMAN Sodium/potassium-transporting ATPase subunit beta-1 OS=Homo sapiens GN=ATP1B1 PE=1 SV=1;>sp P05026-2 AT1    | 4.84E-65   |         |
| P05060                   | SCG1_HUMAN Secretogranin-1 OS=Homo sapiens GN=CHGB PE=1 SV=2                                                            | 3.44E-31   |         |
| P05067                   | A4_HUMAN Amyloid beta A4 protein OS=Homo sapiens GN=APP PE=1 SV=3                                                       |            | 28.16   |
| P05067-10                | A4_HUMAN Isoform APP639 of Amyloid beta A4 protein OS=Homo sapiens GN=APP                                               |            | 24.99   |
| P05067-2                 | A4_HUMAN Isoform APP305 of Amyloid beta A4 protein OS=Homo sapiens GN=APP                                               |            | 0.64    |
| P05067-3                 | A4_HUMAN Isoform L-APP677 of Amyloid beta A4 protein OS=Homo sapiens GN=APP                                             |            | 25.63   |
| P05067-4                 | A4_HUMAN Isoform APP695 of Amyloid beta A4 protein OS=Homo sapiens GN=APP                                               |            | 25.63   |
| P05067-5                 | A4_HUMAN Isoform L-APP696 of Amyloid beta A4 protein OS=Homo sapiens GN=APP                                             |            | 28.16   |
| P05067-6                 | A4_HUMAN Isoform APP714 of Amyloid beta A4 protein OS=Homo sapiens GN=APP                                               |            | 28.16   |
| P05067-7                 | A4_HUMAN Isoform L-APP733 of Amyloid beta A4 protein OS=Homo sapiens GN=APP                                             |            | 25.63   |
| P05067-8                 | A4_HUMAN Isoform APP751 of Amyloid beta A4 protein OS=Homo sapiens GN=APP                                               |            | 25.63   |
| P05067-9                 | A4_HUMAN Isoform L-APP752 of Amyloid beta A4 protein OS=Homo sapiens GN=APP                                             |            | 28.16   |
| P05067;P05067-8;P05067-9 | A4_HUMAN Amyloid beta A4 protein OS=Homo sapiens GN=APP PE=1 SV=3;>sp P05067-8 A4_HUMAN Isoform APP751 of Amyloid be    | 2.28E-09   |         |
| P05089                   | ARGI1_HUMAN Arginase-1 OS=Homo sapiens GN=ARG1 PE=1 SV=2                                                                |            | 27.13   |
| P05089-2                 | ARGI1_HUMAN Isoform 2 of Arginase-1 OS=Homo sapiens GN=ARG1                                                             |            | 26.08   |
| P05089-3                 | ARGI1_HUMAN Isoform 3 of Arginase-1 OS=Homo sapiens GN=ARG1                                                             |            | 27.13   |
| P05090                   | APOD_HUMAN Apolipoprotein D OS=Homo sapiens GN=APOD PE=1 SV=1                                                           | 1.27E-191  |         |
| P05091                   | ALDH2_HUMAN Aldehyde dehydrogenase, mitochondrial OS=Homo sapiens GN=ALDH2 PE=1 SV=2                                    |            | 283.54  |
| P05107                   | ITB2_HUMAN Integrin beta-2 OS=Homo sapiens GN=ITGB2 PE=1 SV=2                                                           |            |         |
| P05109                   | S10A8_HUMAN Protein S100-A8 OS=Homo sapiens GN=S100A8 PE=1 SV=1                                                         |            | 39.43   |
| P05114                   | HMG1_HUMAN Non-histone chromosomal protein HMG-14 OS=Homo sapiens GN=HMG1 PE=1 SV=3                                     |            | 68.17   |
| P05120                   | PAI2_HUMAN Plasminogen activator inhibitor 2 OS=Homo sapiens GN=SERPIN2 PE=1 SV=2                                       | 0          |         |
| P05121                   | PAI1_HUMAN Plasminogen activator inhibitor 1 OS=Homo sapiens GN=SERPINE1 PE=1 SV=1                                      |            | 216.61  |
| P05129                   | KPCG_HUMAN Protein kinase C gamma type OS=Homo sapiens GN=PRKCG PE=1 SV=3                                               |            |         |
| P05141                   | ADT2_HUMAN ADP/ATP translocase 2 OS=Homo sapiens GN=SLC25A5 PE=1 SV=7                                                   |            | 1027.86 |
| P05155                   | IC1_HUMAN Plasma protease C1 inhibitor OS=Homo sapiens GN=SERPING1 PE=1 SV=2                                            | 3.85E-122  |         |
| P05156                   | CFAI_HUMAN Complement factor I OS=Homo sapiens GN=CFI PE=1 SV=2                                                         | 3.53E-51   |         |
| P05161                   | ISG15_HUMAN Ubiquitin-like protein ISG15 OS=Homo sapiens GN=ISG15 PE=1 SV=5                                             |            | 31.67   |
| P05164                   | PERM_HUMAN Myeloperoxidase OS=Homo sapiens GN=MPO PE=1 SV=1                                                             |            |         |
| P05164-2                 | PERM_HUMAN Isoform H14 of Myeloperoxidase OS=Homo sapiens GN=MPO                                                        |            |         |
| P05164-3                 | PERM_HUMAN Isoform H7 of Myeloperoxidase OS=Homo sapiens GN=MPO                                                         |            |         |
| P05164-3;P05164;P05164-2 | 3 PERM_HUMAN Isoform H7 of Myeloperoxidase OS=Homo sapiens GN=MPO;>sp P05164 PERM_HUMAN Myeloperoxidase OS=Homo :       | 1.05E-23   |         |
| P05165;P05165-2          | PCCA_HUMAN Propionyl-CoA carboxylase alpha chain, mitochondrial OS=Homo sapiens GN=PCCA PE=1 SV=4;>sp P05165-2 PCCA_H   | 2.60E-19   |         |
| P05166                   | PCCB_HUMAN Propionyl-CoA carboxylase beta chain, mitochondrial OS=Homo sapiens GN=PCCB PE=1 SV=3                        | 1.50E-06   |         |
| P05186                   | PPBT_HUMAN Alkaline phosphatase, tissue-nonspecific isozyme OS=Homo sapiens GN=ALPL PE=1 SV=4                           | 3.17E-15   |         |
| P05198                   | IF2A_HUMAN Eukaryotic translation initiation factor 2 subunit 1 OS=Homo sapiens GN=EIF2S1 PE=1 SV=3                     |            | 953.55  |
| P05204                   | HMG2_HUMAN Non-histone chromosomal protein HMG-17 OS=Homo sapiens GN=HMG2 PE=1 SV=3                                     |            | 36.91   |
| P05231                   | IL6_HUMAN Interleukin-6 OS=Homo sapiens GN=IL6 PE=1 SV=1                                                                |            | 185.28  |
| P05305                   | EDN1_HUMAN Endothelin-1 OS=Homo sapiens GN=EDN1 PE=1 SV=1                                                               |            |         |
| P05362                   | ICAM1_HUMAN Intercellular adhesion molecule 1 OS=Homo sapiens GN=ICAM1 PE=1 SV=2                                        |            | 608.87  |
| P05386                   | RLA1_HUMAN 60S acidic ribosomal protein P1 OS=Homo sapiens GN=RPLP1 PE=1 SV=1                                           |            | 266.41  |
| P05387                   | RLA2_HUMAN 60S acidic ribosomal protein P2 OS=Homo sapiens GN=RPLP2 PE=1 SV=1                                           |            | 756.97  |
| P05388                   | RLA0_HUMAN 60S acidic ribosomal protein P0 OS=Homo sapiens GN=RPLP0 PE=1 SV=1                                           |            | 922.15  |
| P05412                   | JUN_HUMAN Transcription factor AP-1 OS=Homo sapiens GN=JUN PE=1 SV=2                                                    | 0.00021084 |         |
| P05413                   | FABPH_HUMAN Fatty acid-binding protein, heart OS=Homo sapiens GN=FABP3 PE=1 SV=4                                        | 7.50E-15   |         |
| P05452                   | TETN_HUMAN Tetranectin OS=Homo sapiens GN=CLEC3B PE=1 SV=3                                                              |            |         |
| P05455                   | LA_HUMAN Lupus La protein OS=Homo sapiens GN=SSB PE=1 SV=2                                                              |            | 668.44  |
| P05534                   | 1A24_HUMAN HLA class I histocompatibility antigen, A-24 alpha chain OS=Homo sapiens GN=HLA-A PE=1 SV=2                  |            | 596.6   |
| P05546                   | HEP2_HUMAN Heparin cofactor 2 OS=Homo sapiens GN=SERPIND1 PE=1 SV=3                                                     | 5.91E-65   |         |
| P05549                   | AP2A_HUMAN Transcription factor AP-2-alpha OS=Homo sapiens GN=TFAP2A PE=1 SV=1                                          |            |         |
| P05549-2                 | AP2A_HUMAN Isoform 4 of Transcription factor AP-2-alpha OS=Homo sapiens GN=TFAP2A                                       |            |         |
| P05556                   | ITB1_HUMAN Integrin beta-1 OS=Homo sapiens GN=ITGB1 PE=1 SV=2                                                           |            | 1647.83 |
| P05556-2                 | ITB1_HUMAN Isoform Beta-1B of Integrin beta-1 OS=Homo sapiens GN=ITGB1                                                  |            | 1547.11 |

|                                                                       |                                                                                                                                                                                                                                                                                                                                                                                                                                                                                                              |            |         |
|-----------------------------------------------------------------------|--------------------------------------------------------------------------------------------------------------------------------------------------------------------------------------------------------------------------------------------------------------------------------------------------------------------------------------------------------------------------------------------------------------------------------------------------------------------------------------------------------------|------------|---------|
| P05556-3                                                              | ITB1_HUMAN Isoform Beta-1C of Integrin beta-1 OS=Homo sapiens GN=ITGB1                                                                                                                                                                                                                                                                                                                                                                                                                                       |            | 1547.11 |
| P05556-3;P05556-4;P05556-5                                            | 3 ITB1_HUMAN Isoform Beta-1C of Integrin beta-1 OS=Homo sapiens GN=ITGB1;>sp P05556-4 ITB1_HUMAN Isoform Beta-1C-2 of Integrin beta-1 OS=Homo sapiens GN=ITGB1                                                                                                                                                                                                                                                                                                                                               | 1.58E-13   |         |
| P05556-4                                                              | ITB1_HUMAN Isoform Beta-1C-2 of Integrin beta-1 OS=Homo sapiens GN=ITGB1                                                                                                                                                                                                                                                                                                                                                                                                                                     |            | 1547.11 |
| P05556-5                                                              | ITB1_HUMAN Isoform Beta-1D of Integrin beta-1 OS=Homo sapiens GN=ITGB1                                                                                                                                                                                                                                                                                                                                                                                                                                       |            | 1547.11 |
| P05556;P05556-3;P05556-4                                              | ITB1_HUMAN Integrin beta-1 OS=Homo sapiens GN=ITGB1 PE=1 SV=2;>sp P05556-3 ITB1_HUMAN Isoform Beta-1C of Integrin beta-1 OS=Homo sapiens GN=ITGB1 PE=1 SV=2                                                                                                                                                                                                                                                                                                                                                  | 0          |         |
| P05771-2;P05771                                                       | 2 KPCB_HUMAN Isoform Beta-II of Protein kinase C beta type OS=Homo sapiens GN=PRKCB;>sp P05771 KPCB_HUMAN Protein kinase C beta type OS=Homo sapiens GN=PRKCB                                                                                                                                                                                                                                                                                                                                                | 7.89E-17   |         |
| P05783                                                                | K1C18_HUMAN Keratin, type I cytoskeletal 18 OS=Homo sapiens GN=KRT18 PE=1 SV=2                                                                                                                                                                                                                                                                                                                                                                                                                               |            | 1087.06 |
| P05787                                                                | K2C8_HUMAN Keratin, type II cytoskeletal 8 OS=Homo sapiens GN=KRT8 PE=1 SV=7                                                                                                                                                                                                                                                                                                                                                                                                                                 |            | 1682.12 |
| P05976                                                                | MYL1_HUMAN Myosin light chain 1/3, skeletal muscle isoform OS=Homo sapiens GN=MYL1 PE=1 SV=3                                                                                                                                                                                                                                                                                                                                                                                                                 |            | 113.01  |
| P05976-2                                                              | MYL1_HUMAN Isoform MLC3 of Myosin light chain 1/3, skeletal muscle isoform OS=Homo sapiens GN=MYL1                                                                                                                                                                                                                                                                                                                                                                                                           |            | 113.01  |
| P05997                                                                | CO5A2_HUMAN Collagen alpha-2(V) chain OS=Homo sapiens GN=COL5A2 PE=1 SV=3                                                                                                                                                                                                                                                                                                                                                                                                                                    | 1.12E-11   |         |
| P06132                                                                | DCUP_HUMAN Uroporphyrinogen decarboxylase OS=Homo sapiens GN=UROD PE=1 SV=2                                                                                                                                                                                                                                                                                                                                                                                                                                  |            | 50.53   |
| P06133                                                                | UD2B4_HUMAN UDP-glucuronosyltransferase 2B4 OS=Homo sapiens GN=UGT2B4 PE=1 SV=2                                                                                                                                                                                                                                                                                                                                                                                                                              |            |         |
| P06239                                                                | LCK_HUMAN Tyrosine-protein kinase Lck OS=Homo sapiens GN=LCK PE=1 SV=6                                                                                                                                                                                                                                                                                                                                                                                                                                       |            | 62.5    |
| P06239-2                                                              | LCK_HUMAN Isoform Short of Tyrosine-protein kinase Lck OS=Homo sapiens GN=LCK                                                                                                                                                                                                                                                                                                                                                                                                                                |            | 13.74   |
| P06239-3                                                              | LCK_HUMAN Isoform 3 of Tyrosine-protein kinase Lck OS=Homo sapiens GN=LCK                                                                                                                                                                                                                                                                                                                                                                                                                                    |            | 62.5    |
| P06241                                                                | FYN_HUMAN Tyrosine-protein kinase Fyn OS=Homo sapiens GN=FYN PE=1 SV=3                                                                                                                                                                                                                                                                                                                                                                                                                                       |            | 108.67  |
| P06241-2                                                              | FYN_HUMAN Isoform 2 of Tyrosine-protein kinase Fyn OS=Homo sapiens GN=FYN                                                                                                                                                                                                                                                                                                                                                                                                                                    |            | 108.67  |
| P06241-3                                                              | FYN_HUMAN Isoform 3 of Tyrosine-protein kinase Fyn OS=Homo sapiens GN=FYN                                                                                                                                                                                                                                                                                                                                                                                                                                    |            | 108.67  |
| P06276                                                                | CHLE_HUMAN Cholinesterase OS=Homo sapiens GN=BCHE PE=1 SV=1                                                                                                                                                                                                                                                                                                                                                                                                                                                  |            |         |
| P06280                                                                | AGAL_HUMAN Alpha-galactosidase A OS=Homo sapiens GN=GLA PE=1 SV=1                                                                                                                                                                                                                                                                                                                                                                                                                                            | 2.15E-28   |         |
| P06309;P01617;P06310;P06311;P06312;P06313;P06314;P06315;P06316;P01702 | KV205_HUMAN Ig kappa chain V-II region GM607 (Fragment) OS=Homo sapiens PE=4 SV=1;>sp P01617 KV204_HUMAN Ig kappa chain V-II region GM607 (Fragment) OS=Homo sapiens PE=4 SV=1;>sp P06312 KV403_HUMAN Ig kappa chain V-IV region JI OS=Homo sapiens PE=4 SV=1;>sp P06313 KV401_HUMAN Ig kappa chain V-IV region JI OS=Homo sapiens PE=4 SV=1;>sp P01702 LV104_HUMAN Ig lambda chain V-I region BL2 OS=Homo sapiens PE=2 SV=1;>sp P01702 LV104_HUMAN Ig lambda chain V-I region BL2 OS=Homo sapiens PE=2 SV=1 | 9.06E-48   |         |
| P06331;P01825                                                         | HV209_HUMAN Ig heavy chain V-II region ARH-77 OS=Homo sapiens PE=4 SV=1;>sp P01825 HV207_HUMAN Ig heavy chain V-II region ARH-77 OS=Homo sapiens PE=4 SV=1                                                                                                                                                                                                                                                                                                                                                   | 0.00024023 |         |
| P06396                                                                | GELS_HUMAN Gelsolin OS=Homo sapiens GN=GSN PE=1 SV=1                                                                                                                                                                                                                                                                                                                                                                                                                                                         |            | 71.28   |
| P06396-2                                                              | GELS_HUMAN Isoform 2 of Gelsolin OS=Homo sapiens GN=GSN                                                                                                                                                                                                                                                                                                                                                                                                                                                      |            | 71.28   |
| P06396;Q5T0I2                                                         | GELS_HUMAN Gelsolin OS=Homo sapiens GN=GSN PE=1 SV=1;>tr Q5T0I2 Q5T0I2_HUMAN Gelsolin (Amyloidosis, Finnish type) OS=Homo sapiens GN=GSN PE=1 SV=1                                                                                                                                                                                                                                                                                                                                                           | 0          |         |
| P06400                                                                | RB_HUMAN Retinoblastoma-associated protein OS=Homo sapiens GN=RB1 PE=1 SV=2                                                                                                                                                                                                                                                                                                                                                                                                                                  |            |         |
| P06401;P06401-2                                                       | PRGR_HUMAN Progesterone receptor OS=Homo sapiens GN=PGR PE=1 SV=4;>sp P06401-2 PRGR_HUMAN Isoform A of Progesterone receptor OS=Homo sapiens GN=PGR PE=1 SV=4                                                                                                                                                                                                                                                                                                                                                | 2.90E-06   |         |
| P06454                                                                | PTMA_HUMAN Prothymosin alpha OS=Homo sapiens GN=PTMA PE=1 SV=2                                                                                                                                                                                                                                                                                                                                                                                                                                               |            |         |
| P06454-2                                                              | PTMA_HUMAN Isoform 2 of Prothymosin alpha OS=Homo sapiens GN=PTMA                                                                                                                                                                                                                                                                                                                                                                                                                                            |            |         |
| P06454;P06454-2                                                       | PTMA_HUMAN Prothymosin alpha OS=Homo sapiens GN=PTMA PE=1 SV=2;>sp P06454-2 PTMA_HUMAN Isoform 2 of Prothymosin alpha OS=Homo sapiens GN=PTMA                                                                                                                                                                                                                                                                                                                                                                | 2.03E-53   |         |
| P06493                                                                | CDK1_HUMAN Cyclin-dependent kinase 1 OS=Homo sapiens GN=CDK1 PE=1 SV=3                                                                                                                                                                                                                                                                                                                                                                                                                                       |            | 394.17  |
| P06493-2                                                              | CDK1_HUMAN Isoform 2 of Cyclin-dependent kinase 1 OS=Homo sapiens GN=CDK1                                                                                                                                                                                                                                                                                                                                                                                                                                    |            | 259.86  |
| P06493;P06493-2                                                       | CDK1_HUMAN Cyclin-dependent kinase 1 OS=Homo sapiens GN=CDK1 PE=1 SV=3;>sp P06493-2 CDK1_HUMAN Isoform 2 of Cyclin-dependent kinase 1 OS=Homo sapiens GN=CDK1                                                                                                                                                                                                                                                                                                                                                | 1.26E-90   |         |
| P06576                                                                | ATPB_HUMAN ATP synthase subunit beta, mitochondrial OS=Homo sapiens GN=ATP5B PE=1 SV=3                                                                                                                                                                                                                                                                                                                                                                                                                       |            | 1764.07 |
| P06681                                                                | CO2_HUMAN Complement C2 OS=Homo sapiens GN=C2 PE=1 SV=2                                                                                                                                                                                                                                                                                                                                                                                                                                                      | 7.33E-06   |         |
| P06702                                                                | S10A9_HUMAN Protein S100-A9 OS=Homo sapiens GN=S100A9 PE=1 SV=1                                                                                                                                                                                                                                                                                                                                                                                                                                              |            |         |
| P06703                                                                | S10A6_HUMAN Protein S100-A6 OS=Homo sapiens GN=S100A6 PE=1 SV=1                                                                                                                                                                                                                                                                                                                                                                                                                                              |            | 286.8   |
| P06727                                                                | APOA4_HUMAN Apolipoprotein A-IV OS=Homo sapiens GN=APOA4 PE=1 SV=3                                                                                                                                                                                                                                                                                                                                                                                                                                           |            | 106.68  |
| P06730                                                                | EIF4E_HUMAN Eukaryotic translation initiation factor 4E OS=Homo sapiens GN=EIF4E PE=1 SV=2                                                                                                                                                                                                                                                                                                                                                                                                                   |            | 150.03  |
| P06733                                                                | ENOA_HUMAN Alpha-enolase OS=Homo sapiens GN=ENO1 PE=1 SV=2                                                                                                                                                                                                                                                                                                                                                                                                                                                   |            | 2024.09 |
| P06733-2                                                              | ENOA_HUMAN Isoform MBP-1 of Alpha-enolase OS=Homo sapiens GN=ENO1                                                                                                                                                                                                                                                                                                                                                                                                                                            |            | 1607.74 |
| P06733;P06733-2                                                       | ENOA_HUMAN Alpha-enolase OS=Homo sapiens GN=ENO1 PE=1 SV=2;>sp P06733-2 ENOA_HUMAN Isoform MBP-1 of Alpha-enolase OS=Homo sapiens GN=ENO1                                                                                                                                                                                                                                                                                                                                                                    | 0          |         |
| P06734;P06734-2                                                       | FCER2_HUMAN Low affinity immunoglobulin epsilon Fc receptor OS=Homo sapiens GN=FCER2 PE=1 SV=1;>sp P06734-2 FCER2_HUMAN Isoform 2 of Low affinity immunoglobulin epsilon Fc receptor OS=Homo sapiens GN=FCER2                                                                                                                                                                                                                                                                                                | 9.63E-19   |         |
| P06737                                                                | PYGL_HUMAN Glycogen phosphorylase, liver form OS=Homo sapiens GN=PYGL PE=1 SV=4                                                                                                                                                                                                                                                                                                                                                                                                                              |            | 83.09   |
| P06744                                                                | G6PI_HUMAN Glucose-6-phosphate isomerase OS=Homo sapiens GN=GPI PE=1 SV=4                                                                                                                                                                                                                                                                                                                                                                                                                                    |            | 673.22  |
| P06746;Q53EV2;B7Z1W5                                                  | DPOLB_HUMAN DNA polymerase beta OS=Homo sapiens GN=POLB PE=1 SV=3;>tr Q53EV2 Q53EV2_HUMAN Polymerase (DNA direct) OS=Homo sapiens GN=POLB                                                                                                                                                                                                                                                                                                                                                                    | 1.95E-07   |         |
| P06748                                                                | NPM_HUMAN Nucleophosmin OS=Homo sapiens GN=NPM1 PE=1 SV=2                                                                                                                                                                                                                                                                                                                                                                                                                                                    |            | 1128.21 |
| P06748-2                                                              | NPM_HUMAN Isoform 2 of Nucleophosmin OS=Homo sapiens GN=NPM1                                                                                                                                                                                                                                                                                                                                                                                                                                                 |            | 1128.21 |
| P06748;P06748-2                                                       | NPM_HUMAN Nucleophosmin OS=Homo sapiens GN=NPM1 PE=1 SV=2;>sp P06748-2 NPM_HUMAN Isoform 2 of Nucleophosmin OS=Homo sapiens GN=NPM1                                                                                                                                                                                                                                                                                                                                                                          | 0          |         |
| P06753                                                                | TPM3_HUMAN Tropomyosin alpha-3 chain OS=Homo sapiens GN=TPM3 PE=1 SV=1                                                                                                                                                                                                                                                                                                                                                                                                                                       |            | 398.84  |
| P06753-2                                                              | TPM3_HUMAN Isoform 2 of Tropomyosin alpha-3 chain OS=Homo sapiens GN=TPM3                                                                                                                                                                                                                                                                                                                                                                                                                                    |            | 621.22  |
| P06753-2;P06753-3                                                     | 2 TPM3_HUMAN Isoform 2 of Tropomyosin alpha-3 chain OS=Homo sapiens GN=TPM3;>sp P06753-3 TPM3_HUMAN Isoform 3 of Tropomyosin alpha-3 chain OS=Homo sapiens GN=TPM3                                                                                                                                                                                                                                                                                                                                           | 0          |         |
| P06753-3                                                              | TPM3_HUMAN Isoform 3 of Tropomyosin alpha-3 chain OS=Homo sapiens GN=TPM3                                                                                                                                                                                                                                                                                                                                                                                                                                    |            | 555.83  |
| P06756                                                                | ITAV_HUMAN Integrin alpha-V OS=Homo sapiens GN=ITGAV PE=1 SV=2                                                                                                                                                                                                                                                                                                                                                                                                                                               |            | 125.37  |
| P06756-2                                                              | ITAV_HUMAN Isoform 2 of Integrin alpha-V OS=Homo sapiens GN=ITGAV                                                                                                                                                                                                                                                                                                                                                                                                                                            |            | 125.37  |
| P06756;P06756-2                                                       | ITAV_HUMAN Integrin alpha-V OS=Homo sapiens GN=ITGAV PE=1 SV=2;>sp P06756-2 ITAV_HUMAN Isoform 2 of Integrin alpha-V OS=Homo sapiens GN=ITGAV                                                                                                                                                                                                                                                                                                                                                                | 6.16E-78   |         |
| P06865                                                                | HEXA_HUMAN Beta-hexosaminidase subunit alpha OS=Homo sapiens GN=HEXA PE=1 SV=2                                                                                                                                                                                                                                                                                                                                                                                                                               |            |         |
| P06899                                                                | H2B1J_HUMAN Histone H2B type 1-J OS=Homo sapiens GN=HIST1H2BJ PE=1 SV=3                                                                                                                                                                                                                                                                                                                                                                                                                                      |            | 729.36  |

|                            |                                                                                                                         |           |         |
|----------------------------|-------------------------------------------------------------------------------------------------------------------------|-----------|---------|
| P07093;P07093-2            | GDN_HUMAN Glia-derived nexin OS=Homo sapiens GN=SERPINE2 PE=1 SV=1;>sp P07093-2 GDN_HUMAN Isoform 2 of Glia-derived     | 4.61E-17  |         |
| P07099                     | HYEP_HUMAN Epoxide hydrolase 1 OS=Homo sapiens GN=EPHX1 PE=1 SV=1                                                       |           | 149.84  |
| P07108                     | ACBP_HUMAN Acyl-CoA-binding protein OS=Homo sapiens GN=DBI PE=1 SV=2                                                    |           | 76.14   |
| P07108-2                   | ACBP_HUMAN Isoform 2 of Acyl-CoA-binding protein OS=Homo sapiens GN=DBI                                                 |           | 76.14   |
| P07108-2;P07108-3;P07108-3 | 2 ACBP_HUMAN Isoform 2 of Acyl-CoA-binding protein OS=Homo sapiens GN=DBI;>sp P07108-3 ACBP_HUMAN Isoform 3 of Acyl-Co. | 9.71E-36  |         |
| P07108-3                   | ACBP_HUMAN Isoform 3 of Acyl-CoA-binding protein OS=Homo sapiens GN=DBI                                                 |           | 76.14   |
| P07108;P07108-2;P07108     | ACBP_HUMAN Acyl-CoA-binding protein OS=Homo sapiens GN=DBI PE=1 SV=2;>sp P07108-2 ACBP_HUMAN Isoform 2 of Acyl-CoA-t    | 4.94E-20  |         |
| P07195                     | LDHB_HUMAN L-lactate dehydrogenase B chain OS=Homo sapiens GN=LDHB PE=1 SV=2                                            |           | 725.87  |
| P07196                     | NFL_HUMAN Neurofilament light polypeptide OS=Homo sapiens GN=NEFL PE=1 SV=3                                             |           | 103.13  |
| P07197                     | NFM_HUMAN Neurofilament medium polypeptide OS=Homo sapiens GN=NEFM PE=1 SV=3                                            |           | 97.16   |
| P07203                     | GPX1_HUMAN Glutathione peroxidase 1 OS=Homo sapiens GN=GPX1 PE=1 SV=4                                                   |           | 240.85  |
| P07205                     | PGK2_HUMAN Phosphoglycerate kinase 2 OS=Homo sapiens GN=PGK2 PE=1 SV=3                                                  |           | 242.74  |
| P07237                     | PDIA1_HUMAN Protein disulfide-isomerase OS=Homo sapiens GN=P4HB PE=1 SV=3                                               |           | 1878.31 |
| P07305                     | H10_HUMAN Histone H1.0 OS=Homo sapiens GN=H1F0 PE=1 SV=3                                                                |           | 258.54  |
| P07311                     | ACYP1_HUMAN Acylphosphatase-1 OS=Homo sapiens GN=ACYP1 PE=1 SV=2                                                        |           | 48.79   |
| P07339                     | CATD_HUMAN Cathepsin D OS=Homo sapiens GN=CTSD PE=1 SV=1                                                                |           | 774.29  |
| P07355                     | ANXA2_HUMAN Annexin A2 OS=Homo sapiens GN=ANXA2 PE=1 SV=2                                                               |           | 2941.65 |
| P07355-2                   | ANXA2_HUMAN Isoform 2 of Annexin A2 OS=Homo sapiens GN=ANXA2                                                            |           | 2912.28 |
| P07355-2;P07355;A6NMYI     | 2 ANXA2_HUMAN Isoform 2 of Annexin A2 OS=Homo sapiens GN=ANXA2;>sp P07355 ANXA2_HUMAN Annexin A2 OS=Homo sapiens        | 2.83E-269 |         |
| P07357                     | CO8A_HUMAN Complement component C8 alpha chain OS=Homo sapiens GN=C8A PE=1 SV=2                                         | 8.16E-100 |         |
| P07358                     | CO8B_HUMAN Complement component C8 beta chain OS=Homo sapiens GN=C8B PE=1 SV=3                                          | 6.48E-13  |         |
| P07360                     | CO8G_HUMAN Complement component C8 gamma chain OS=Homo sapiens GN=C8G PE=1 SV=3                                         | 3.55E-37  |         |
| P07384                     | CAN1_HUMAN Calpain-1 catalytic subunit OS=Homo sapiens GN=CAPN1 PE=1 SV=1                                               |           |         |
| P07437                     | TBB5_HUMAN Tubulin beta chain OS=Homo sapiens GN=TUBB PE=1 SV=2                                                         |           | 2474.18 |
| P07476                     | INVO_HUMAN Involucrin OS=Homo sapiens GN=IVL PE=1 SV=2                                                                  |           |         |
| P07477                     | TRY1_HUMAN Trypsin-1 OS=Homo sapiens GN=PRSS1 PE=1 SV=1                                                                 |           |         |
| P07478                     | TRY2_HUMAN Trypsin-2 OS=Homo sapiens GN=PRSS2 PE=1 SV=1                                                                 |           |         |
| P07498                     | CASK_HUMAN Kappa-casein OS=Homo sapiens GN=CSN3 PE=1 SV=3                                                               | 1.12E-05  |         |
| P07585;P07585-4            | PGS2_HUMAN Decorin OS=Homo sapiens GN=DCN PE=1 SV=1;>sp P07585-4 PGS2_HUMAN Isoform D of Decorin OS=Homo sapiens        | 0         |         |
| P07602                     | SAP_HUMAN Proactivator polypeptide OS=Homo sapiens GN=PSAP PE=1 SV=2                                                    |           | 484.31  |
| P07602-2                   | SAP_HUMAN Isoform Sap-mu-6 of Proactivator polypeptide OS=Homo sapiens GN=PSAP                                          |           | 484.31  |
| P07602-3                   | SAP_HUMAN Isoform Sap-mu-9 of Proactivator polypeptide OS=Homo sapiens GN=PSAP                                          |           | 484.31  |
| P07602-3;P07602-2;P07602-3 | 3 SAP_HUMAN Isoform Sap-mu-9 of Proactivator polypeptide OS=Homo sapiens GN=PSAP;>sp P07602-2 SAP_HUMAN Isoform Sap-n   | 6.84E-58  |         |
| P07602;P07602-3;P07602     | SAP_HUMAN Proactivator polypeptide OS=Homo sapiens GN=PSAP PE=1 SV=2;>sp P07602-3 SAP_HUMAN Isoform Sap-mu-9 of Proa    | 1.79E-154 |         |
| P07686                     | HEXB_HUMAN Beta-hexosaminidase subunit beta OS=Homo sapiens GN=HEXB PE=1 SV=3                                           |           | 270.85  |
| P07711                     | CATL1_HUMAN Cathepsin L1 OS=Homo sapiens GN=CTSL1 PE=1 SV=2                                                             | 2.23E-08  |         |
| P07737                     | PROF1_HUMAN Profilin-1 OS=Homo sapiens GN=PFN1 PE=1 SV=2                                                                |           | 1084.54 |
| P07738                     | PMGE_HUMAN Bisphosphoglycerate mutase OS=Homo sapiens GN=BPGM PE=1 SV=2                                                 | 1.97E-30  |         |
| P07741                     | APT_HUMAN Adenine phosphoribosyltransferase OS=Homo sapiens GN=APRT PE=1 SV=2                                           |           | 243.17  |
| P07814                     | SYEP_HUMAN Bifunctional aminoacyl-tRNA synthetase OS=Homo sapiens GN=EPRS PE=1 SV=5                                     |           | 1232.26 |
| P07858                     | CATB_HUMAN Cathepsin B OS=Homo sapiens GN=CTSB PE=1 SV=3                                                                |           | 271.52  |
| P07864                     | LDHC_HUMAN L-lactate dehydrogenase C chain OS=Homo sapiens GN=LDHC PE=2 SV=4                                            |           | 134.46  |
| P07900                     | HS90A_HUMAN Heat shock protein HSP 90-alpha OS=Homo sapiens GN=HSP90AA1 PE=1 SV=5                                       |           | 2001.57 |
| P07900-2                   | HS90A_HUMAN Isoform 2 of Heat shock protein HSP 90-alpha OS=Homo sapiens GN=HSP90AA1                                    |           | 2008.35 |
| P07900-2;P07900            | 2 HS90A_HUMAN Isoform 2 of Heat shock protein HSP 90-alpha OS=Homo sapiens GN=HSP90AA1;>sp P07900 HS90A_HUMAN Heat      | 0         |         |
| P07910                     | HNRPC_HUMAN Heterogeneous nuclear ribonucleoproteins C1/C2 OS=Homo sapiens GN=HNRNPC PE=1 SV=4                          |           | 561.45  |
| P07910-2                   | HNRPC_HUMAN Isoform C1 of Heterogeneous nuclear ribonucleoproteins C1/C2 OS=Homo sapiens GN=HNRNPC                      |           | 681.22  |
| P07910-3                   | HNRPC_HUMAN Isoform 3 of Heterogeneous nuclear ribonucleoproteins C1/C2 OS=Homo sapiens GN=HNRNPC                       |           | 250.05  |
| P07910-4                   | HNRPC_HUMAN Isoform 4 of Heterogeneous nuclear ribonucleoproteins C1/C2 OS=Homo sapiens GN=HNRNPC                       |           | 655.48  |
| P07910;P07910-2;P07910     | HNRPC_HUMAN Heterogeneous nuclear ribonucleoproteins C1/C2 OS=Homo sapiens GN=HNRNPC PE=1 SV=4;>sp P07910-2 HNRPC_      | 1.60E-64  |         |
| P07919                     | QCR6_HUMAN Cytochrome b-c1 complex subunit 6, mitochondrial OS=Homo sapiens GN=UQCRH PE=1 SV=2                          |           | 78.96   |
| P07942                     | LAMB1_HUMAN Laminin subunit beta-1 OS=Homo sapiens GN=LAMB1 PE=1 SV=2                                                   | 2.35E-207 |         |
| P07947                     | YES_HUMAN Tyrosine-protein kinase Yes OS=Homo sapiens GN=YES1 PE=1 SV=3                                                 |           | 109.1   |
| P07948                     | LYN_HUMAN Tyrosine-protein kinase Lyn OS=Homo sapiens GN=LYN PE=1 SV=3                                                  |           | 150.52  |
| P07948-2                   | LYN_HUMAN Isoform LYN B of Tyrosine-protein kinase Lyn OS=Homo sapiens GN=LYN                                           |           | 150.52  |
| P07948;P07948-2            | LYN_HUMAN Tyrosine-protein kinase Lyn OS=Homo sapiens GN=LYN PE=1 SV=3;>sp P07948-2 LYN_HUMAN Isoform LYN B of Tyrosin  | 3.86E-14  |         |
| P07949                     | RET_HUMAN Proto-oncogene tyrosine-protein kinase receptor Ret OS=Homo sapiens GN=RET PE=1 SV=3                          |           |         |
| P07949-2                   | RET_HUMAN Isoform 2 of Proto-oncogene tyrosine-protein kinase receptor Ret OS=Homo sapiens GN=RET                       |           |         |
| P07951                     | TPM2_HUMAN Tropomyosin beta chain OS=Homo sapiens GN=TPM2 PE=1 SV=1                                                     |           | 267.27  |
| P07951-2                   | TPM2_HUMAN Isoform 2 of Tropomyosin beta chain OS=Homo sapiens GN=TPM2                                                  |           | 267.27  |
| P07951-3                   | TPM2_HUMAN Isoform 3 of Tropomyosin beta chain OS=Homo sapiens GN=TPM2                                                  |           | 257.43  |



|                        |                                                                                                                              |            |         |
|------------------------|------------------------------------------------------------------------------------------------------------------------------|------------|---------|
| P07954                 | FUMH_HUMAN Fumarate hydratase, mitochondrial OS=Homo sapiens GN=FH PE=1 SV=3                                                 |            | 327.75  |
| P07954-2               | FUMH_HUMAN Isoform Cytoplasmic of Fumarate hydratase, mitochondrial OS=Homo sapiens GN=FH                                    |            | 327.75  |
| P07954;P07954-2        | FUMH_HUMAN Fumarate hydratase, mitochondrial OS=Homo sapiens GN=FH PE=1 SV=3;>sp P07954-2 FUMH_HUMAN Isoform Cyto            | 0          |         |
| P07996                 | TSP1_HUMAN Thrombospondin-1 OS=Homo sapiens GN=THBS1 PE=1 SV=2                                                               |            | 357.25  |
| P08069                 | IGF1R_HUMAN Insulin-like growth factor 1 receptor OS=Homo sapiens GN=IGF1R PE=1 SV=1                                         |            |         |
| P08107                 | HSP71_HUMAN Heat shock 70 kDa protein 1A/1B OS=Homo sapiens GN=HSPA1A PE=1 SV=5                                              |            | 662.66  |
| P08123                 | CO1A2_HUMAN Collagen alpha-2(I) chain OS=Homo sapiens GN=COL1A2 PE=1 SV=7                                                    |            | 37.78   |
| P08133                 | ANXA6_HUMAN Annexin A6 OS=Homo sapiens GN=ANXA6 PE=1 SV=3                                                                    |            | 1772.32 |
| P08134                 | RHOC_HUMAN Rho-related GTP-binding protein RhoC OS=Homo sapiens GN=RHOC PE=1 SV=1                                            |            | 803.66  |
| P08174                 | DAF_HUMAN Complement decay-accelerating factor OS=Homo sapiens GN=CD55 PE=1 SV=4                                             |            | 134.17  |
| P08174-2               | DAF_HUMAN Isoform 1 of Complement decay-accelerating factor OS=Homo sapiens GN=CD55                                          |            | 134.17  |
| P08174-2;P08174        | 2 DAF_HUMAN Isoform 1 of Complement decay-accelerating factor OS=Homo sapiens GN=CD55;>sp P08174 DAF_HUMAN Compleme          | 2.58E-15   |         |
| P08185                 | CBG_HUMAN Corticosteroid-binding globulin OS=Homo sapiens GN=SERPINA6 PE=1 SV=1                                              |            | 87.92   |
| P08195                 | 4F2_HUMAN 4F2 cell-surface antigen heavy chain OS=Homo sapiens GN=SLC3A2 PE=1 SV=3                                           |            | 1433.53 |
| P08195-2               | 4F2_HUMAN Isoform 2 of 4F2 cell-surface antigen heavy chain OS=Homo sapiens GN=SLC3A2                                        |            | 1433.53 |
| P08195-3               | 4F2_HUMAN Isoform 3 of 4F2 cell-surface antigen heavy chain OS=Homo sapiens GN=SLC3A2                                        |            | 1433.53 |
| P08195-4               | 4F2_HUMAN Isoform 4 of 4F2 cell-surface antigen heavy chain OS=Homo sapiens GN=SLC3A2                                        |            | 1433.53 |
| P08195-4;P08195;P08195 | 4 4F2_HUMAN Isoform 4 of 4F2 cell-surface antigen heavy chain OS=Homo sapiens GN=SLC3A2;>sp P08195 4F2_HUMAN 4F2 cell-su     | 0          |         |
| P08236;B4E1F6;B2R6X2;F | BGLR_HUMAN Beta-glucuronidase OS=Homo sapiens GN=GUSB PE=1 SV=2;>tr B4E1F6 B4E1F6_HUMAN cDNA FLJ53268, highly simi           | 2.11E-46   |         |
| P08237;P08237-2        | K6PF_HUMAN 6-phosphofructokinase, muscle type OS=Homo sapiens GN=PFKM PE=1 SV=2;>sp P08237-2 K6PF_HUMAN Isoform 2 c          | 1.92E-67   |         |
| P08238                 | HS90B_HUMAN Heat shock protein HSP 90-beta OS=Homo sapiens GN=HSP90AB1 PE=1 SV=4                                             |            | 2366.92 |
| P08240                 | SRPR_HUMAN Signal recognition particle receptor subunit alpha OS=Homo sapiens GN=SRPR PE=1 SV=2                              |            | 114.24  |
| P08243                 | ASNS_HUMAN Asparagine synthetase [glutamine-hydrolyzing] OS=Homo sapiens GN=ASNS PE=1 SV=4                                   |            | 23.35   |
| P08246                 | ELNE_HUMAN Neutrophil elastase OS=Homo sapiens GN=ELANE PE=1 SV=1                                                            | 5.74E-15   |         |
| P08253                 | MMP2_HUMAN 72 kDa type IV collagenase OS=Homo sapiens GN=MMP2 PE=1 SV=2                                                      | 4.88E-46   |         |
| P08254                 | MMP3_HUMAN Stromelysin-1 OS=Homo sapiens GN=MMP3 PE=1 SV=2                                                                   |            |         |
| P08263;P09210;Q16772;C | GSTA1_HUMAN Glutathione S-transferase A1 OS=Homo sapiens GN=GSTA1 PE=1 SV=3;>sp P09210 GSTA2_HUMAN Glutathione S-tr          | 1.91E-17   |         |
| P08294                 | SODE_HUMAN Extracellular superoxide dismutase [Cu-Zn] OS=Homo sapiens GN=SOD3 PE=1 SV=2                                      | 4.12E-69   |         |
| P08311                 | CATG_HUMAN Cathepsin G OS=Homo sapiens GN=CTSG PE=1 SV=2                                                                     | 1.42E-20   |         |
| P08397                 | HEM3_HUMAN Porphobilinogen deaminase OS=Homo sapiens GN=HMBS PE=1 SV=2                                                       |            |         |
| P08397-2               | HEM3_HUMAN Isoform 2 of Porphobilinogen deaminase OS=Homo sapiens GN=HMBS                                                    |            |         |
| P08397;P08397-2        | HEM3_HUMAN Porphobilinogen deaminase OS=Homo sapiens GN=HMBS PE=1 SV=2;>sp P08397-2 HEM3_HUMAN Isoform 2 of Porph            | 1.41E-39   |         |
| P08493                 | MGP_HUMAN Matrix Gla protein OS=Homo sapiens GN=MGP PE=1 SV=2                                                                | 5.18E-39   |         |
| P08519                 | APOA_HUMAN Apolipoprotein(a) OS=Homo sapiens GN=LPA PE=1 SV=1                                                                | 0.00011439 |         |
| P08559                 | ODPA_HUMAN Pyruvate dehydrogenase E1 component subunit alpha, somatic form, mitochondrial OS=Homo sapiens GN=PDHA1 PE=1 SV=3 |            | 239.94  |
| P08567                 | PLEK_HUMAN Pleckstrin OS=Homo sapiens GN=PLEK PE=1 SV=3                                                                      | 6.71E-271  |         |
| P08571                 | CD14_HUMAN Monocyte differentiation antigen CD14 OS=Homo sapiens GN=CD14 PE=1 SV=2                                           | 3.05E-146  |         |
| P08572                 | CO4A2_HUMAN Collagen alpha-2(IV) chain OS=Homo sapiens GN=COL4A2 PE=1 SV=4                                                   | 1.38E-162  |         |
| P08574                 | CY1_HUMAN Cytochrome c1, heme protein, mitochondrial OS=Homo sapiens GN=CYC1 PE=1 SV=3                                       |            | 288.64  |
| P08575;P08575-2        | PTPRC_HUMAN Receptor-type tyrosine-protein phosphatase C OS=Homo sapiens GN=PTPRC PE=1 SV=2;>sp P08575-2 PTPRC_HUMA          | 4.62E-15   |         |
| P08579                 | RU2B_HUMAN U2 small nuclear ribonucleoprotein B'' OS=Homo sapiens GN=SNRNP2 PE=1 SV=1                                        |            | 153.72  |
| P08581-2;A1L467;P08581 | 2 MET_HUMAN Isoform 2 of Hepatocyte growth factor receptor OS=Homo sapiens GN=MET;>tr A1L467 A1L467_HUMAN Met proto-on       | 8.86E-30   |         |
| P08582                 | TRFM_HUMAN Melanotransferrin OS=Homo sapiens GN=MFI2 PE=1 SV=2                                                               |            | 117.89  |
| P08582-2               | TRFM_HUMAN Isoform 2 of Melanotransferrin OS=Homo sapiens GN=MFI2                                                            |            | 64.97   |
| P08590                 | MYL3_HUMAN Myosin light chain 3 OS=Homo sapiens GN=MYL3 PE=1 SV=3                                                            |            | 114.73  |
| P08603                 | CFAH_HUMAN Complement factor H OS=Homo sapiens GN=CFH PE=1 SV=4                                                              | 0          |         |
| P08621                 | RU17_HUMAN U1 small nuclear ribonucleoprotein 70 kDa OS=Homo sapiens GN=SNRNP70 PE=1 SV=2                                    |            | 160.09  |
| P08621-2               | RU17_HUMAN Isoform 2 of U1 small nuclear ribonucleoprotein 70 kDa OS=Homo sapiens GN=SNRNP70                                 |            | 160.09  |
| P08621-3               | RU17_HUMAN Isoform 3 of U1 small nuclear ribonucleoprotein 70 kDa OS=Homo sapiens GN=SNRNP70                                 |            | 160.09  |
| P08621-4               | RU17_HUMAN Isoform 4 of U1 small nuclear ribonucleoprotein 70 kDa OS=Homo sapiens GN=SNRNP70                                 |            |         |
| P08621;A8KAQ5;P08621-  | RU17_HUMAN U1 small nuclear ribonucleoprotein 70 kDa OS=Homo sapiens GN=SNRNP70 PE=1 SV=2;>tr A8KAQ5 A8KAQ5_HUMAN            | 1.12E-179  |         |
| P08631                 | HCK_HUMAN Tyrosine-protein kinase HCK OS=Homo sapiens GN=HCK PE=1 SV=5                                                       |            | 145.17  |
| P08631-2               | HCK_HUMAN Isoform p59-HCK of Tyrosine-protein kinase HCK OS=Homo sapiens GN=HCK                                              |            | 145.17  |
| P08631;P08631-2        | HCK_HUMAN Tyrosine-protein kinase HCK OS=Homo sapiens GN=HCK PE=1 SV=5;>sp P08631-2 HCK_HUMAN Isoform p59-HCK of T           | 5.27E-11   |         |
| P08637                 | FCG3A_HUMAN Low affinity immunoglobulin gamma Fc region receptor III-A OS=Homo sapiens GN=FCGR3A PE=1 SV=2                   | 1.29E-05   |         |
| P08648                 | ITA5_HUMAN Integrin alpha-5 OS=Homo sapiens GN=ITGA5 PE=1 SV=2                                                               |            | 79.53   |
| P08651                 | NFIC_HUMAN Nuclear factor 1 C-type OS=Homo sapiens GN=NFIC PE=1 SV=2                                                         |            |         |
| P08651-2               | NFIC_HUMAN Isoform 1 of Nuclear factor 1 C-type OS=Homo sapiens GN=NFIC                                                      |            |         |
| P08651-3               | NFIC_HUMAN Isoform 2 of Nuclear factor 1 C-type OS=Homo sapiens GN=NFIC                                                      |            |         |
| P08651-4               | NFIC_HUMAN Isoform 3 of Nuclear factor 1 C-type OS=Homo sapiens GN=NFIC                                                      |            |         |
| P08651-5               | NFIC_HUMAN Isoform 5 of Nuclear factor 1 C-type OS=Homo sapiens GN=NFIC                                                      |            |         |

|                        |                                                                                                                         |           |         |
|------------------------|-------------------------------------------------------------------------------------------------------------------------|-----------|---------|
| P08670                 | VIME_HUMAN Vimentin OS=Homo sapiens GN=VIM PE=1 SV=4                                                                    |           | 3540.48 |
| P08697                 | A2AP_HUMAN Alpha-2-antiplasmin OS=Homo sapiens GN=SERPINF2 PE=1 SV=3                                                    |           | 55.18   |
| P08708                 | RS17_HUMAN 40S ribosomal protein S17 OS=Homo sapiens GN=RPS17 PE=1 SV=2                                                 |           | 956.1   |
| P08727                 | K1C19_HUMAN Keratin, type I cytoskeletal 19 OS=Homo sapiens GN=KRT19 PE=1 SV=4                                          |           | 1390.5  |
| P08729                 | K2C7_HUMAN Keratin, type II cytoskeletal 7 OS=Homo sapiens GN=KRT7 PE=1 SV=5                                            |           | 973.33  |
| P08754                 | GNAI3_HUMAN Guanine nucleotide-binding protein G(k) subunit alpha OS=Homo sapiens GN=GNAI3 PE=1 SV=3                    |           | 500.09  |
| P08758                 | ANXA5_HUMAN Annexin A5 OS=Homo sapiens GN=ANXA5 PE=1 SV=2                                                               |           | 1060.51 |
| P08779                 | K1C16_HUMAN Keratin, type I cytoskeletal 16 OS=Homo sapiens GN=KRT16 PE=1 SV=4                                          |           | 836.04  |
| P08833                 | IBP1_HUMAN Insulin-like growth factor-binding protein 1 OS=Homo sapiens GN=IGFBP1 PE=1 SV=1                             |           | 30.29   |
| P08842                 | STS_HUMAN Steryl-sulfatase OS=Homo sapiens GN=STS PE=1 SV=2                                                             |           |         |
| P08865                 | RSSA_HUMAN 40S ribosomal protein SA OS=Homo sapiens GN=RPSA PE=1 SV=4                                                   |           | 903.89  |
| P08912                 | ACM5_HUMAN Muscarinic acetylcholine receptor M5 OS=Homo sapiens GN=CHRM5 PE=2 SV=2                                      |           | 32.52   |
| P08922                 | ROS_HUMAN Proto-oncogene tyrosine-protein kinase ROS OS=Homo sapiens GN=ROS1 PE=2 SV=3                                  |           |         |
| P08962                 | CD63_HUMAN CD63 antigen OS=Homo sapiens GN=CD63 PE=1 SV=2                                                               |           |         |
| P09001                 | RM03_HUMAN 39S ribosomal protein L3, mitochondrial OS=Homo sapiens GN=MRPL3 PE=1 SV=1                                   |           |         |
| P09012                 | SNRPA_HUMAN U1 small nuclear ribonucleoprotein A OS=Homo sapiens GN=SNRPA PE=1 SV=3                                     |           | 111.35  |
| P09104                 | ENOG_HUMAN Gamma-enolase OS=Homo sapiens GN=ENO2 PE=1 SV=3                                                              |           | 358.26  |
| P09110                 | THIK_HUMAN 3-ketoacyl-CoA thiolase, peroxisomal OS=Homo sapiens GN=ACAA1 PE=1 SV=2                                      |           | 47.74   |
| P09131                 | P3_HUMAN P3 protein OS=Homo sapiens GN=SLC10A3 PE=2 SV=1                                                                |           |         |
| P09132                 | SRP19_HUMAN Signal recognition particle 19 kDa protein OS=Homo sapiens GN=SRP19 PE=1 SV=3                               |           | 329.53  |
| P09211                 | GSTP1_HUMAN Glutathione S-transferase P OS=Homo sapiens GN=GSTP1 PE=1 SV=2                                              |           | 839.4   |
| P09234                 | RU1C_HUMAN U1 small nuclear ribonucleoprotein C OS=Homo sapiens GN=SNRPC PE=1 SV=1                                      |           | 242.45  |
| P09327                 | VILI_HUMAN Villin-1 OS=Homo sapiens GN=VIL1 PE=1 SV=4                                                                   |           |         |
| P09382                 | LEG1_HUMAN Galectin-1 OS=Homo sapiens GN=LGALS1 PE=1 SV=2                                                               |           | 935.43  |
| P09417                 | DHPR_HUMAN Dihydropteridine reductase OS=Homo sapiens GN=QDPR PE=1 SV=2                                                 | 1.86E-249 |         |
| P09429                 | HMGB1_HUMAN High mobility group protein B1 OS=Homo sapiens GN=HMGB1 PE=1 SV=3                                           |           | 649.92  |
| P09455                 | RET1_HUMAN Retinol-binding protein 1 OS=Homo sapiens GN=RBP1 PE=1 SV=2                                                  | 4.13E-128 |         |
| P09467                 | F16P1_HUMAN Fructose-1,6-bisphosphatase 1 OS=Homo sapiens GN=FBP1 PE=1 SV=5                                             |           |         |
| P09471                 | GNAO_HUMAN Guanine nucleotide-binding protein G(o) subunit alpha OS=Homo sapiens GN=GNAO1 PE=1 SV=4                     |           | 160.28  |
| P09471-2               | GNAO_HUMAN Isoform Alpha-2 of Guanine nucleotide-binding protein G(o) subunit alpha OS=Homo sapiens GN=GNAO1            |           | 211.04  |
| P09486                 | SPRC_HUMAN SPARC OS=Homo sapiens GN=SPARC PE=1 SV=1                                                                     | 1.08E-10  |         |
| P09488;P09488-2        | GSTM1_HUMAN Glutathione S-transferase Mu 1 OS=Homo sapiens GN=GSTM1 PE=1 SV=3;>sp P09488-2 GSTM1_HUMAN Isoform 2        | 9.33E-96  |         |
| P09493                 | TPM1_HUMAN Tropomyosin alpha-1 chain OS=Homo sapiens GN=TPM1 PE=1 SV=2                                                  |           | 198     |
| P09493-2               | TPM1_HUMAN Isoform 2 of Tropomyosin alpha-1 chain OS=Homo sapiens GN=TPM1                                               |           | 192.8   |
| P09493-3               | TPM1_HUMAN Isoform 3 of Tropomyosin alpha-1 chain OS=Homo sapiens GN=TPM1                                               |           | 211.33  |
| P09493-3;P09493-4      | 3 TPM1_HUMAN Isoform 3 of Tropomyosin alpha-1 chain OS=Homo sapiens GN=TPM1;>sp P09493-4 TPM1_HUMAN Isoform 4 of Trop   | 7.35E-32  |         |
| P09493-4               | TPM1_HUMAN Isoform 4 of Tropomyosin alpha-1 chain OS=Homo sapiens GN=TPM1                                               |           | 211.33  |
| P09493-5               | TPM1_HUMAN Isoform 5 of Tropomyosin alpha-1 chain OS=Homo sapiens GN=TPM1                                               |           | 252.84  |
| P09493-6               | TPM1_HUMAN Isoform 6 of Tropomyosin alpha-1 chain OS=Homo sapiens GN=TPM1                                               |           | 192.49  |
| P09496                 | CLCA_HUMAN Clathrin light chain A OS=Homo sapiens GN=CLTA PE=1 SV=1                                                     |           | 251.86  |
| P09496-2               | CLCA_HUMAN Isoform Non-brain of Clathrin light chain A OS=Homo sapiens GN=CLTA                                          |           | 363.31  |
| P09496-3               | CLCA_HUMAN Isoform 3 of Clathrin light chain A OS=Homo sapiens GN=CLTA                                                  |           | 251.86  |
| P09496;P09496-3;B4DIN1 | CLCA_HUMAN Clathrin light chain A OS=Homo sapiens GN=CLTA PE=1 SV=1;>sp P09496-3 CLCA_HUMAN Isoform 3 of Clathrin light | 8.03E-12  |         |
| P09497                 | CLCB_HUMAN Clathrin light chain B OS=Homo sapiens GN=CLTB PE=1 SV=1                                                     |           | 216.98  |
| P09497-2               | CLCB_HUMAN Isoform Non-brain of Clathrin light chain B OS=Homo sapiens GN=CLTB                                          |           | 224.34  |
| P09497;P09497-2        | CLCB_HUMAN Clathrin light chain B OS=Homo sapiens GN=CLTB PE=1 SV=1;>sp P09497-2 CLCB_HUMAN Isoform Non-brain of Clath  | 1.23E-14  |         |
| P09525                 | ANXA4_HUMAN Annexin A4 OS=Homo sapiens GN=ANXA4 PE=1 SV=4                                                               |           | 99.84   |
| P09543                 | CN37_HUMAN 2',3'-cyclic-nucleotide 3'-phosphodiesterase OS=Homo sapiens GN=CNP PE=1 SV=2                                |           | 658.5   |
| P09543-2               | CN37_HUMAN Isoform CNPI of 2',3'-cyclic-nucleotide 3'-phosphodiesterase OS=Homo sapiens GN=CNP                          |           | 658.5   |
| P09543;P09543-2        | CN37_HUMAN 2,3-cyclic-nucleotide 3-phosphodiesterase OS=Homo sapiens GN=CNP PE=1 SV=2;>sp P09543-2 CN37_HUMAN Isofor    | 1.42E-24  |         |
| P09601                 | HMOX1_HUMAN Heme oxygenase 1 OS=Homo sapiens GN=HMOX1 PE=1 SV=1                                                         | 1.55E-05  |         |
| P09622                 | DLDH_HUMAN Dihydrolipoyl dehydrogenase, mitochondrial OS=Homo sapiens GN=DLD PE=1 SV=2                                  |           | 668.33  |
| P09651                 | ROA1_HUMAN Heterogeneous nuclear ribonucleoprotein A1 OS=Homo sapiens GN=HNRNPA1 PE=1 SV=5                              |           | 1287.51 |
| P09651-2               | ROA1_HUMAN Isoform A1-A of Heterogeneous nuclear ribonucleoprotein A1 OS=Homo sapiens GN=HNRNPA1                        |           | 1287.51 |
| P09651-3               | ROA1_HUMAN Isoform 2 of Heterogeneous nuclear ribonucleoprotein A1 OS=Homo sapiens GN=HNRNPA1                           |           | 1271.87 |
| P09651;P09651-2;P09651 | ROA1_HUMAN Heterogeneous nuclear ribonucleoprotein A1 OS=Homo sapiens GN=HNRNPA1 PE=1 SV=5;>sp P09651-2 ROA1_HUMA       | 9.12E-280 |         |
| P09661                 | RU2A_HUMAN U2 small nuclear ribonucleoprotein A' OS=Homo sapiens GN=SNRPA1 PE=1 SV=2                                    |           | 421.3   |
| P09668                 | CATH_HUMAN Pro-cathepsin H OS=Homo sapiens GN=CTSH PE=1 SV=4                                                            |           |         |
| P09668;Q6IBC3;Q96NY6;  | CATH_HUMAN Cathepsin H OS=Homo sapiens GN=CTSH PE=1 SV=4;>tr Q6IBC3 Q6IBC3_HUMAN CTSH protein OS=Homo sapiens G         | 2.40E-24  |         |
| P09669                 | COX6C_HUMAN Cytochrome c oxidase subunit 6C OS=Homo sapiens GN=COX6C PE=1 SV=2                                          |           | 61.09   |
| P09758                 | TACD2_HUMAN Tumor-associated calcium signal transducer 2 OS=Homo sapiens GN=TACSTD2 PE=1 SV=3                           |           | 208.25  |

|                        |                                                                                                                                          |            |         |
|------------------------|------------------------------------------------------------------------------------------------------------------------------------------|------------|---------|
| P09769                 | FGR_HUMAN Tyrosine-protein kinase Fgr OS=Homo sapiens GN=FGR PE=1 SV=2                                                                   |            | 55.19   |
| P09871                 | C1S_HUMAN Complement C1s subcomponent OS=Homo sapiens GN=C1S PE=1 SV=1                                                                   | 4.07E-79   |         |
| P09874                 | PARP1_HUMAN Poly [ADP-ribose] polymerase 1 OS=Homo sapiens GN=PARP1 PE=1 SV=4                                                            |            | 1202.04 |
| P09884                 | DPOLA_HUMAN DNA polymerase alpha catalytic subunit OS=Homo sapiens GN=POLA1 PE=1 SV=2                                                    | 6.21E-09   |         |
| P09913                 | IFIT2_HUMAN Interferon-induced protein with tetratricopeptide repeats 2 OS=Homo sapiens GN=IFIT2 PE=1 SV=1                               | 2.29E-43   |         |
| P09914                 | IFIT1_HUMAN Interferon-induced protein with tetratricopeptide repeats 1 OS=Homo sapiens GN=IFIT1 PE=1 SV=2                               | 1.81E-134  |         |
| P09917                 | LOX5_HUMAN Arachidonate 5-lipoxygenase OS=Homo sapiens GN=ALOX5 PE=1 SV=2                                                                | 3.38E-21   |         |
| P09936                 | UCHL1_HUMAN Ubiquitin carboxyl-terminal hydrolase isozyme L1 OS=Homo sapiens GN=UCHL1 PE=1 SV=2                                          | 9.78E-190  |         |
| P09960                 | LKHA4_HUMAN Leukotriene A-4 hydrolase OS=Homo sapiens GN=LTA4H PE=1 SV=2                                                                 |            | 33.81   |
| P09960-2               | LKHA4_HUMAN Isoform 2 of Leukotriene A-4 hydrolase OS=Homo sapiens GN=LTA4H                                                              |            | 33.81   |
| P09960-3               | LKHA4_HUMAN Isoform 3 of Leukotriene A-4 hydrolase OS=Homo sapiens GN=LTA4H                                                              |            | 33.81   |
| P09960;B4DVZ8;P09960-; | LKHA4_HUMAN Leukotriene A-4 hydrolase OS=Homo sapiens GN=LTA4H PE=1 SV=2;>tr B4DVZ8 B4DVZ8_HUMAN cDNA FLJ52432, f                        | 0          |         |
| P09972                 | ALDOC_HUMAN Fructose-bisphosphate aldolase C OS=Homo sapiens GN=ALDOC PE=1 SV=2                                                          |            | 57.85   |
| POC0L4                 | CO4A_HUMAN Complement C4-A OS=Homo sapiens GN=C4A PE=1 SV=1                                                                              |            | 445.87  |
| POC0L5                 | CO4B_HUMAN Complement C4-B OS=Homo sapiens GN=C4B PE=1 SV=1                                                                              |            | 445.87  |
| POC0S5                 | H2AZ_HUMAN Histone H2A.Z OS=Homo sapiens GN=H2AFZ PE=1 SV=2                                                                              |            | 250.74  |
| POC0S8                 | H2A1_HUMAN Histone H2A type 1 OS=Homo sapiens GN=HIST1H2AG PE=1 SV=2                                                                     |            | 288.83  |
| POC221                 | CN038_HUMAN Uncharacterized protein C14orf38 OS=Homo sapiens GN=C14orf38 PE=2 SV=1                                                       |            |         |
| POC6E5                 | HMG3M_HUMAN Putative high mobility group protein B3-like protein OS=Homo sapiens PE=5 SV=1                                               |            | 105.96  |
| POC7P0                 | CISD3_HUMAN CDGSH iron-sulfur domain-containing protein 3, mitochondrial OS=Homo sapiens GN=CISD3 PE=1 SV=1                              | 1.59E-08   |         |
| POC7P4                 | UCRIL_HUMAN Putative cytochrome b-c1 complex subunit Rieske-like protein 1 OS=Homo sapiens GN=UQCRFS1P1 PE=5 SV=1                        |            | 270.07  |
| POC7V4                 | F90AJ_HUMAN Putative protein FAM90A15 OS=Homo sapiens GN=FAM90A15 PE=3 SV=1                                                              |            |         |
| POC7W8                 | F90AD_HUMAN Putative protein FAM90A13 OS=Homo sapiens GN=FAM90A13 PE=5 SV=1                                                              |            |         |
| POC7W9                 | F90AE_HUMAN Putative protein FAM90A14 OS=Homo sapiens GN=FAM90A14 PE=3 SV=1                                                              |            |         |
| POC7X0                 | F90AO_HUMAN Putative protein FAM90A24 OS=Homo sapiens GN=FAM90A24P PE=5 SV=1                                                             |            |         |
| POC7X5                 | ZN806_HUMAN Zinc finger protein 806 OS=Homo sapiens GN=ZNF806 PE=2 SV=1                                                                  |            |         |
| POCB38                 | PAB4L_HUMAN Polyadenylate-binding protein 4-like OS=Homo sapiens GN=PABPC4L PE=2 SV=1                                                    |            | 149.56  |
| POCB43;Q9BTY7          | F203B_HUMAN Protein FAM203B OS=Homo sapiens GN=FAM203B PE=3 SV=1;>sp Q9BTY7 F203A_HUMAN Protein FAM203A OS=Hon                           | 0.00012735 |         |
| POCF74                 | LAC6_HUMAN Ig lambda-6 chain C region OS=Homo sapiens GN=IGLC6 PE=4 SV=1                                                                 |            | 158.78  |
| POCG04                 | LAC1_HUMAN Ig lambda-1 chain C regions OS=Homo sapiens GN=IGLC1 PE=1 SV=1                                                                |            | 164.87  |
| POCG05                 | LAC2_HUMAN Ig lambda-2 chain C regions OS=Homo sapiens GN=IGLC2 PE=1 SV=1                                                                |            | 179.92  |
| POCG06                 | LAC3_HUMAN Ig lambda-3 chain C regions OS=Homo sapiens GN=IGLC3 PE=1 SV=1                                                                |            | 179.92  |
| POCG08                 | GPHRB_HUMAN Golgi pH regulator B OS=Homo sapiens GN=GPR89B PE=1 SV=1                                                                     |            |         |
| POCG22                 | DR4L1_HUMAN Putative dehydrogenase/reductase SDR family member 4-like 2 OS=Homo sapiens GN=DHRS4L1 PE=5 SV=1                             |            | 43.71   |
| POCG29                 | GST2_HUMAN Glutathione S-transferase theta-2 OS=Homo sapiens GN=GSTT2 PE=1 SV=1                                                          |            | 20.96   |
| POCG30                 | GSTT2_HUMAN Glutathione S-transferase theta-2B OS=Homo sapiens GN=GSTT2B PE=1 SV=1                                                       |            | 20.96   |
| POCG31                 | Z286B_HUMAN Putative zinc finger protein 286B OS=Homo sapiens GN=ZNF286B PE=5 SV=1                                                       |            | 20.45   |
| POCG38                 | POTEI_HUMAN POTE ankyrin domain family member I OS=Homo sapiens GN=POTEI PE=3 SV=1                                                       |            | 427.71  |
| POCG39                 | POTEJ_HUMAN POTE ankyrin domain family member J OS=Homo sapiens GN=POTEJ PE=3 SV=1                                                       |            | 365.22  |
| POCG47                 | UBB_HUMAN Polyubiquitin-B OS=Homo sapiens GN=UBB PE=1 SV=1                                                                               |            | 465.4   |
| POCG48                 | UBC_HUMAN Polyubiquitin-C OS=Homo sapiens GN=UBC PE=1 SV=2                                                                               |            | 465.4   |
| POCL83                 | ST3L1_HUMAN STAG3-like protein 1 OS=Homo sapiens GN=STAG3L1 PE=3 SV=1                                                                    |            |         |
| POCW22                 | RS17L_HUMAN 40S ribosomal protein S17-like OS=Homo sapiens GN=RPS17L PE=3 SV=1                                                           |            | 956.1   |
| P10071                 | GLI3_HUMAN Transcriptional activator GLI3 OS=Homo sapiens GN=GLI3 PE=1 SV=6                                                              |            |         |
| P10109                 | ADX_HUMAN Adrenodoxin, mitochondrial OS=Homo sapiens GN=FDX1 PE=1 SV=1                                                                   |            | 65.92   |
| P10114                 | RAP2A_HUMAN Ras-related protein Rap-2a OS=Homo sapiens GN=RAP2A PE=1 SV=1                                                                |            | 35.77   |
| P10145                 | IL8_HUMAN Interleukin-8 OS=Homo sapiens GN=IL8 PE=1 SV=1                                                                                 |            | 45.51   |
| P10145-2               | IL8_HUMAN Isoform 2 of Interleukin-8 OS=Homo sapiens GN=IL8                                                                              |            | 45.51   |
| P10155                 | RO60_HUMAN 60 kDa SS-A/Ro ribonucleoprotein OS=Homo sapiens GN=TROVE2 PE=1 SV=2                                                          |            | 43.16   |
| P10244                 | MYBB_HUMAN Myb-related protein B OS=Homo sapiens GN=MYBL2 PE=1 SV=1                                                                      |            |         |
| P10253                 | LYAG_HUMAN Lysosomal alpha-glucosidase OS=Homo sapiens GN=GAA PE=1 SV=4                                                                  |            | 236.08  |
| P10301                 | RRAS_HUMAN Ras-related protein R-Ras OS=Homo sapiens GN=RRAS PE=1 SV=1                                                                   |            | 411.73  |
| P10314                 | 1A32_HUMAN HLA class I histocompatibility antigen, A-32 alpha chain OS=Homo sapiens GN=HLA-A PE=2 SV=2                                   |            | 657.24  |
| P10316                 | 1A69_HUMAN HLA class I histocompatibility antigen, A-69 alpha chain OS=Homo sapiens GN=HLA-A PE=1 SV=2                                   |            | 1276.24 |
| P10319                 | 1B58_HUMAN HLA class I histocompatibility antigen, B-58 alpha chain OS=Homo sapiens GN=HLA-B PE=2 SV=1                                   |            | 573.47  |
| P10321                 | 1C07_HUMAN HLA class I histocompatibility antigen, Cw-7 alpha chain OS=Homo sapiens GN=HLA-C PE=1 SV=3                                   |            | 410.17  |
| P10398                 | ARAF_HUMAN Serine/threonine-protein kinase A-Raf OS=Homo sapiens GN=ARAF PE=1 SV=2                                                       | 3.72E-14   |         |
| P10412                 | H14_HUMAN Histone H1.4 OS=Homo sapiens GN=HIST1H1E PE=1 SV=2                                                                             |            | 521.36  |
| P10415;P10415-2        | BCL2_HUMAN Apoptosis regulator Bcl-2 OS=Homo sapiens GN=BCL2 PE=1 SV=2;>sp P10415-2 BCL2_HUMAN Isoform Beta of Apopt                     | 1.20E-66   |         |
| P10515                 | ODP2_HUMAN Dihydrolipoyllysine-residue acetyltransferase component of pyruvate dehydrogenase complex, mitochondrial OS=Homo sapiens GN=D |            | 293.73  |
| P10586                 | PTPRF_HUMAN Receptor-type tyrosine-protein phosphatase F OS=Homo sapiens GN=PTPRF PE=1 SV=2                                              |            | 94.94   |

|                            |                                                                                                                                                                                   |           |         |
|----------------------------|-----------------------------------------------------------------------------------------------------------------------------------------------------------------------------------|-----------|---------|
| P10586-2                   | PTPRF_HUMAN Isoform 2 of Receptor-type tyrosine-protein phosphatase F OS=Homo sapiens GN=PTPRF                                                                                    |           | 94.94   |
| P10586;P10586-2            | PTPRF_HUMAN Receptor-type tyrosine-protein phosphatase F OS=Homo sapiens GN=PTPRF PE=1 SV=2;>sp P10586-2 PTPRF_HUMAN                                                              | 3.95E-29  |         |
| P10588                     | NR2F6_HUMAN Nuclear receptor subfamily 2 group F member 6 OS=Homo sapiens GN=NR2F6 PE=1 SV=2                                                                                      |           | 45.93   |
| P10589                     | COT1_HUMAN COUP transcription factor 1 OS=Homo sapiens GN=NR2F1 PE=1 SV=1                                                                                                         |           | 57.79   |
| P10599                     | THIO_HUMAN Thioredoxin OS=Homo sapiens GN=TXN PE=1 SV=3                                                                                                                           |           | 293.43  |
| P10606                     | COX5B_HUMAN Cytochrome c oxidase subunit 5B, mitochondrial OS=Homo sapiens GN=COX5B PE=1 SV=2                                                                                     |           | 188.8   |
| P10619                     | PPGB_HUMAN Lysosomal protective protein OS=Homo sapiens GN=CTSA PE=1 SV=2                                                                                                         |           | 147.01  |
| P10620                     | MGST1_HUMAN Microsomal glutathione S-transferase 1 OS=Homo sapiens GN=MGST1 PE=1 SV=1                                                                                             |           | 152.65  |
| P10643                     | CO7_HUMAN Complement component C7 OS=Homo sapiens GN=C7 PE=1 SV=2                                                                                                                 | 4.83E-08  |         |
| P10644                     | KAP0_HUMAN cAMP-dependent protein kinase type I-alpha regulatory subunit OS=Homo sapiens GN=PRKAR1A PE=1 SV=1                                                                     |           | 65.4    |
| P10768                     | ESTD_HUMAN S-formylglutathione hydrolase OS=Homo sapiens GN=ESD PE=1 SV=2                                                                                                         |           | 79.56   |
| P10809                     | CH60_HUMAN 60 kDa heat shock protein, mitochondrial OS=Homo sapiens GN=HSPD1 PE=1 SV=2                                                                                            |           | 3324.19 |
| P10827                     | THA_HUMAN Thyroid hormone receptor alpha OS=Homo sapiens GN=THRA PE=1 SV=1                                                                                                        |           |         |
| P10827-2                   | THA_HUMAN Isoform Alpha-1 of Thyroid hormone receptor alpha OS=Homo sapiens GN=THRA                                                                                               |           |         |
| P10827-3                   | THA_HUMAN Isoform Alpha-3 of Thyroid hormone receptor alpha OS=Homo sapiens GN=THRA                                                                                               |           |         |
| P10827-4                   | THA_HUMAN Isoform Alpha-4 of Thyroid hormone receptor alpha OS=Homo sapiens GN=THRA                                                                                               |           |         |
| P10828                     | THB_HUMAN Thyroid hormone receptor beta OS=Homo sapiens GN=THRB PE=1 SV=2                                                                                                         |           |         |
| P10828-2                   | THB_HUMAN Isoform Beta-2 of Thyroid hormone receptor beta OS=Homo sapiens GN=THRB                                                                                                 |           |         |
| P10909                     | CLUS_HUMAN Clusterin OS=Homo sapiens GN=CLU PE=1 SV=1                                                                                                                             |           | 23.1    |
| P10909-2                   | CLUS_HUMAN Isoform 2 of Clusterin OS=Homo sapiens GN=CLU                                                                                                                          |           | 23.1    |
| P10909-2;P10909-5;P10909-5 | 2 CLUS_HUMAN Isoform 2 of Clusterin OS=Homo sapiens GN=CLU;>sp P10909-5 CLUS_HUMAN Isoform 5 of Clusterin OS=Homo sapiens GN=CLU                                                  | 4.65E-303 |         |
| P10909-3                   | CLUS_HUMAN Isoform 3 of Clusterin OS=Homo sapiens GN=CLU                                                                                                                          |           | 1.79    |
| P10909-4                   | CLUS_HUMAN Isoform 4 of Clusterin OS=Homo sapiens GN=CLU                                                                                                                          |           | 23.1    |
| P10909-5                   | CLUS_HUMAN Isoform 5 of Clusterin OS=Homo sapiens GN=CLU                                                                                                                          |           | 23.1    |
| P10915                     | HPLN1_HUMAN Hyaluronan and proteoglycan link protein 1 OS=Homo sapiens GN=HAPLN1 PE=2 SV=2                                                                                        |           |         |
| P11021                     | GRP78_HUMAN 78 kDa glucose-regulated protein OS=Homo sapiens GN=HSPA5 PE=1 SV=2                                                                                                   |           | 3221.8  |
| P11047                     | LAMC1_HUMAN Laminin subunit gamma-1 OS=Homo sapiens GN=LAMC1 PE=1 SV=3                                                                                                            |           |         |
| P11055                     | MYH3_HUMAN Myosin-3 OS=Homo sapiens GN=MYH3 PE=1 SV=3                                                                                                                             |           | 68.2    |
| P11086                     | PNMT_HUMAN Phenylethanolamine N-methyltransferase OS=Homo sapiens GN=PNMT PE=1 SV=1                                                                                               | 1.07E-21  |         |
| P11117;B7Z6L8;B7Z552;E     | PPAL_HUMAN Lysosomal acid phosphatase OS=Homo sapiens GN=ACP2 PE=1 SV=3;>tr B7Z6L8 B7Z6L8_HUMAN cDNA FLJ53923, highly conserved                                                   | 6.40E-06  |         |
| P11137                     | MAP2_HUMAN Microtubule-associated protein 2 OS=Homo sapiens GN=MAP2 PE=1 SV=4                                                                                                     |           |         |
| P11137-2                   | MAP2_HUMAN Isoform 2 of Microtubule-associated protein 2 OS=Homo sapiens GN=MAP2                                                                                                  |           |         |
| P11137-3                   | MAP2_HUMAN Isoform 3 of Microtubule-associated protein 2 OS=Homo sapiens GN=MAP2                                                                                                  |           |         |
| P11142                     | HSP7C_HUMAN Heat shock cognate 71 kDa protein OS=Homo sapiens GN=HSPA8 PE=1 SV=1                                                                                                  |           | 1999.48 |
| P11142-2                   | HSP7C_HUMAN Isoform 2 of Heat shock cognate 71 kDa protein OS=Homo sapiens GN=HSPA8                                                                                               |           | 1810.25 |
| P11142;P11142-2            | HSP7C_HUMAN Heat shock cognate 71 kDa protein OS=Homo sapiens GN=HSPA8 PE=1 SV=1;>sp P11142-2 HSP7C_HUMAN Isoform 2 of Heat shock cognate 71 kDa protein OS=Homo sapiens GN=HSPA8 | 0         |         |
| P11166                     | GTR1_HUMAN Solute carrier family 2, facilitated glucose transporter member 1 OS=Homo sapiens GN=SLC2A1 PE=1 SV=2                                                                  |           | 420.75  |
| P11171                     | 41_HUMAN Protein 4.1 OS=Homo sapiens GN=EPB41 PE=1 SV=4                                                                                                                           |           |         |
| P11171-2                   | 41_HUMAN Isoform 2 of Protein 4.1 OS=Homo sapiens GN=EPB41                                                                                                                        |           |         |
| P11171-3                   | 41_HUMAN Isoform 3 of Protein 4.1 OS=Homo sapiens GN=EPB41                                                                                                                        |           |         |
| P11171-4                   | 41_HUMAN Isoform 4 of Protein 4.1 OS=Homo sapiens GN=EPB41                                                                                                                        |           |         |
| P11171-5                   | 41_HUMAN Isoform 5 of Protein 4.1 OS=Homo sapiens GN=EPB41                                                                                                                        |           |         |
| P11171-6                   | 41_HUMAN Isoform 6 of Protein 4.1 OS=Homo sapiens GN=EPB41                                                                                                                        |           |         |
| P11171-7                   | 41_HUMAN Isoform 7 of Protein 4.1 OS=Homo sapiens GN=EPB41                                                                                                                        |           |         |
| P11172;P11172-2            | UMPS_HUMAN Uridine 5-monophosphate synthase OS=Homo sapiens GN=UMPS PE=1 SV=1;>sp P11172-2 UMPS_HUMAN Isoform 2 of Uridine 5-monophosphate synthase OS=Homo sapiens GN=UMPS       | 6.63E-108 |         |
| P11177                     | ODPB_HUMAN Pyruvate dehydrogenase E1 component subunit beta, mitochondrial OS=Homo sapiens GN=PDHB PE=1 SV=3                                                                      |           | 664.04  |
| P11177-2                   | ODPB_HUMAN Isoform 2 of Pyruvate dehydrogenase E1 component subunit beta, mitochondrial OS=Homo sapiens GN=PDHB                                                                   |           | 664.04  |
| P11177;B4DDD7;P11177-2     | ODPB_HUMAN Pyruvate dehydrogenase E1 component subunit beta, mitochondrial OS=Homo sapiens GN=PDHB PE=1 SV=3;>tr B4DDD7 B4DDD7_HUMAN cDNA FLJ53923, highly conserved              | 5.91E-84  |         |
| P11182                     | ODB2_HUMAN Lipoamide acyltransferase component of branched-chain alpha-keto acid dehydrogenase complex, mitochondrial OS=Homo sapiens GN=DBT PE=1 SV=3                            |           |         |
| P11215                     | ITAM_HUMAN Integrin alpha-M OS=Homo sapiens GN=ITGAM PE=1 SV=2                                                                                                                    | 2.15E-08  |         |
| P11216                     | PYGB_HUMAN Glycogen phosphorylase, brain form OS=Homo sapiens GN=PYGB PE=1 SV=5                                                                                                   |           | 210.34  |
| P11217                     | PYGM_HUMAN Glycogen phosphorylase, muscle form OS=Homo sapiens GN=PYGM PE=1 SV=6                                                                                                  |           | 25.37   |
| P11233                     | RALA_HUMAN Ras-related protein Ral-A OS=Homo sapiens GN=RALA PE=1 SV=1                                                                                                            |           | 431.26  |
| P11234                     | RALB_HUMAN Ras-related protein Ral-B OS=Homo sapiens GN=RALB PE=1 SV=1                                                                                                            |           | 597.62  |
| P11274                     | BCR_HUMAN Breakpoint cluster region protein OS=Homo sapiens GN=BCR PE=1 SV=2                                                                                                      |           |         |
| P11274-2                   | BCR_HUMAN Isoform 2 of Breakpoint cluster region protein OS=Homo sapiens GN=BCR                                                                                                   |           |         |
| P11274;P11274-2;Q12843     | BCR_HUMAN Breakpoint cluster region protein OS=Homo sapiens GN=BCR PE=1 SV=2;>sp P11274-2 BCR_HUMAN Isoform 2 of Breakpoint cluster region protein OS=Homo sapiens GN=BCR         | 6.45E-05  |         |
| P11277                     | SPTB1_HUMAN Spectrin beta chain, erythrocyte OS=Homo sapiens GN=SPTB PE=1 SV=5                                                                                                    |           | 159.61  |
| P11277-2                   | SPTB1_HUMAN Isoform 2 of Spectrin beta chain, erythrocyte OS=Homo sapiens GN=SPTB                                                                                                 |           | 159.61  |
| P11277-2;P11277            | 2 SPTB1_HUMAN Isoform 2 of Spectrin beta chain, erythrocyte OS=Homo sapiens GN=SPTB;>sp P11277 SPTB1_HUMAN Spectrin beta chain, erythrocyte OS=Homo sapiens GN=SPTB               | 4.46E-26  |         |
| P11277-3                   | SPTB1_HUMAN Isoform 3 of Spectrin beta chain, erythrocyte OS=Homo sapiens GN=SPTB                                                                                                 |           | 159.61  |

|                            |                                                                                                                                                                                                                   |           |         |
|----------------------------|-------------------------------------------------------------------------------------------------------------------------------------------------------------------------------------------------------------------|-----------|---------|
| P11279                     | LAMP1_HUMAN Lysosome-associated membrane glycoprotein 1 OS=Homo sapiens GN=LAMP1 PE=1 SV=3                                                                                                                        |           | 236.99  |
| P11310-2;P11310            | 2 ACADM_HUMAN Isoform 2 of Medium-chain specific acyl-CoA dehydrogenase, mitochondrial OS=Homo sapiens GN=ACADM;>sp P11310-2 ACADM_HUMAN Isoform 2 of Medium-chain specific acyl-CoA dehydrogenase, mitochondrial | 2.32E-218 |         |
| P11362                     | FGFR1_HUMAN Basic fibroblast growth factor receptor 1 OS=Homo sapiens GN=FGFR1 PE=1 SV=3                                                                                                                          |           | 71.31   |
| P11362-10                  | FGFR1_HUMAN Isoform 7 of Basic fibroblast growth factor receptor 1 OS=Homo sapiens GN=FGFR1                                                                                                                       |           | 15.24   |
| P11362-11                  | FGFR1_HUMAN Isoform 9 of Basic fibroblast growth factor receptor 1 OS=Homo sapiens GN=FGFR1                                                                                                                       |           | 15.24   |
| P11362-12                  | FGFR1_HUMAN Isoform 11 of Basic fibroblast growth factor receptor 1 OS=Homo sapiens GN=FGFR1                                                                                                                      |           | 7.46    |
| P11362-13                  | FGFR1_HUMAN Isoform 13 of Basic fibroblast growth factor receptor 1 OS=Homo sapiens GN=FGFR1                                                                                                                      |           | 7.46    |
| P11362-14                  | FGFR1_HUMAN Isoform 15 of Basic fibroblast growth factor receptor 1 OS=Homo sapiens GN=FGFR1                                                                                                                      |           | 59.4    |
| P11362-15                  | FGFR1_HUMAN Isoform 16 of Basic fibroblast growth factor receptor 1 OS=Homo sapiens GN=FGFR1                                                                                                                      |           | 4.13    |
| P11362-16                  | FGFR1_HUMAN Isoform 17 of Basic fibroblast growth factor receptor 1 OS=Homo sapiens GN=FGFR1                                                                                                                      |           | 7.78    |
| P11362-19                  | FGFR1_HUMAN Isoform 19 of Basic fibroblast growth factor receptor 1 OS=Homo sapiens GN=FGFR1                                                                                                                      |           | 64.15   |
| P11362-2                   | FGFR1_HUMAN Isoform 4 of Basic fibroblast growth factor receptor 1 OS=Homo sapiens GN=FGFR1                                                                                                                       |           | 71.31   |
| P11362-3                   | FGFR1_HUMAN Isoform 6 of Basic fibroblast growth factor receptor 1 OS=Homo sapiens GN=FGFR1                                                                                                                       |           | 67.18   |
| P11362-4                   | FGFR1_HUMAN Isoform 8 of Basic fibroblast growth factor receptor 1 OS=Homo sapiens GN=FGFR1                                                                                                                       |           | 67.18   |
| P11362-5                   | FGFR1_HUMAN Isoform 10 of Basic fibroblast growth factor receptor 1 OS=Homo sapiens GN=FGFR1                                                                                                                      |           | 59.4    |
| P11362-6                   | FGFR1_HUMAN Isoform 12 of Basic fibroblast growth factor receptor 1 OS=Homo sapiens GN=FGFR1                                                                                                                      |           | 59.4    |
| P11362-7                   | FGFR1_HUMAN Isoform 14 of Basic fibroblast growth factor receptor 1 OS=Homo sapiens GN=FGFR1                                                                                                                      |           | 63.53   |
| P11362-8                   | FGFR1_HUMAN Isoform 2 of Basic fibroblast growth factor receptor 1 OS=Homo sapiens GN=FGFR1                                                                                                                       |           | 19.37   |
| P11362-9                   | FGFR1_HUMAN Isoform 5 of Basic fibroblast growth factor receptor 1 OS=Homo sapiens GN=FGFR1                                                                                                                       |           | 19.37   |
| P11387                     | TOP1_HUMAN DNA topoisomerase 1 OS=Homo sapiens GN=TOP1 PE=1 SV=2                                                                                                                                                  |           | 546.53  |
| P11388                     | TOP2A_HUMAN DNA topoisomerase 2-alpha OS=Homo sapiens GN=TOP2A PE=1 SV=3                                                                                                                                          |           | 820.38  |
| P11388-2                   | TOP2A_HUMAN Isoform 2 of DNA topoisomerase 2-alpha OS=Homo sapiens GN=TOP2A                                                                                                                                       |           | 820.38  |
| P11388-3                   | TOP2A_HUMAN Isoform 3 of DNA topoisomerase 2-alpha OS=Homo sapiens GN=TOP2A                                                                                                                                       |           | 820.38  |
| P11388-4                   | TOP2A_HUMAN Isoform 4 of DNA topoisomerase 2-alpha OS=Homo sapiens GN=TOP2A                                                                                                                                       |           | 820.38  |
| P11388-4;P11388-3;P11388-2 | 4 TOP2A_HUMAN Isoform 4 of DNA topoisomerase 2-alpha OS=Homo sapiens GN=TOP2A;>sp P11388-3 TOP2A_HUMAN Isoform 3 of DNA topoisomerase 2-alpha OS=Homo sapiens GN=TOP2A                                            | 0         |         |
| P11413                     | G6PD_HUMAN Glucose-6-phosphate 1-dehydrogenase OS=Homo sapiens GN=G6PD PE=1 SV=4                                                                                                                                  |           | 167.14  |
| P11413-2                   | G6PD_HUMAN Isoform Long of Glucose-6-phosphate 1-dehydrogenase OS=Homo sapiens GN=G6PD                                                                                                                            |           | 167.14  |
| P11413-2;P11413-3;A8K82    | 2 G6PD_HUMAN Isoform 2 of Glucose-6-phosphate 1-dehydrogenase OS=Homo sapiens GN=G6PD;>sp P11413-3 G6PD_HUMAN Isoform 3 of Glucose-6-phosphate 1-dehydrogenase OS=Homo sapiens GN=G6PD                            | 6.23E-142 |         |
| P11413-3                   | G6PD_HUMAN Isoform 3 of Glucose-6-phosphate 1-dehydrogenase OS=Homo sapiens GN=G6PD                                                                                                                               |           | 167.14  |
| P11441                     | UBL4A_HUMAN Ubiquitin-like protein 4A OS=Homo sapiens GN=UBL4A PE=1 SV=1                                                                                                                                          |           | 44.51   |
| P11473                     | VDR_HUMAN Vitamin D3 receptor OS=Homo sapiens GN=VDR PE=1 SV=1                                                                                                                                                    |           |         |
| P11474                     | ERR1_HUMAN Steroid hormone receptor ERR1 OS=Homo sapiens GN=ESRRA PE=1 SV=3                                                                                                                                       |           |         |
| P11474-2                   | ERR1_HUMAN Isoform 2 of Steroid hormone receptor ERR1 OS=Homo sapiens GN=ESRRA                                                                                                                                    |           |         |
| P11488                     | GNAT1_HUMAN Guanine nucleotide-binding protein G(t) subunit alpha-1 OS=Homo sapiens GN=GNAT1 PE=1 SV=5                                                                                                            |           | 175.53  |
| P11498                     | PYC_HUMAN Pyruvate carboxylase, mitochondrial OS=Homo sapiens GN=PC PE=1 SV=2                                                                                                                                     |           | 77.41   |
| P11509                     | CP2A6_HUMAN Cytochrome P450 2A6 OS=Homo sapiens GN=CYP2A6 PE=1 SV=3                                                                                                                                               |           |         |
| P11511                     | CP19A_HUMAN Cytochrome P450 19A1 OS=Homo sapiens GN=CYP19A1 PE=1 SV=3                                                                                                                                             |           |         |
| P11532                     | DMD_HUMAN Dystrophin OS=Homo sapiens GN=DMD PE=1 SV=3                                                                                                                                                             |           | 90.26   |
| P11532-2                   | DMD_HUMAN Isoform 1 of Dystrophin OS=Homo sapiens GN=DMD                                                                                                                                                          |           | 57.96   |
| P11532-3                   | DMD_HUMAN Isoform 2 of Dystrophin OS=Homo sapiens GN=DMD                                                                                                                                                          |           | 57.96   |
| P11532-4                   | DMD_HUMAN Isoform 3 of Dystrophin OS=Homo sapiens GN=DMD                                                                                                                                                          |           | 90.26   |
| P11532;P11532-4;P11532-3   | DMD_HUMAN Dystrophin OS=Homo sapiens GN=DMD PE=1 SV=3;>sp P11532-4 DMD_HUMAN Isoform 3 of Dystrophin OS=Homo sapiens GN=DMD                                                                                       | 2.07E-09  |         |
| P11586                     | C1TC_HUMAN C-1-tetrahydrofolate synthase, cytoplasmic OS=Homo sapiens GN=MTHFD1 PE=1 SV=3                                                                                                                         |           | 244.59  |
| P11678                     | PERE_HUMAN Eosinophil peroxidase OS=Homo sapiens GN=EPX PE=1 SV=2                                                                                                                                                 | 3.29E-05  |         |
| P11712                     | CP2C9_HUMAN Cytochrome P450 2C9 OS=Homo sapiens GN=CYP2C9 PE=1 SV=3                                                                                                                                               |           |         |
| P11717                     | MPRI_HUMAN Cation-independent mannose-6-phosphate receptor OS=Homo sapiens GN=IGF2R PE=1 SV=3                                                                                                                     |           | 912.79  |
| P11766                     | ADHX_HUMAN Alcohol dehydrogenase class-3 OS=Homo sapiens GN=ADH5 PE=1 SV=4                                                                                                                                        |           | 43.06   |
| P11802                     | CDK4_HUMAN Cyclin-dependent kinase 4 OS=Homo sapiens GN=CDK4 PE=1 SV=2                                                                                                                                            |           | 49.63   |
| P11836                     | CD20_HUMAN B-lymphocyte antigen CD20 OS=Homo sapiens GN=MS4A1 PE=1 SV=1                                                                                                                                           | 2.27E-179 |         |
| P11908                     | PRPS2_HUMAN Ribose-phosphate pyrophosphokinase 2 OS=Homo sapiens GN=PRPS2 PE=1 SV=2                                                                                                                               |           | 27.09   |
| P11908-2                   | PRPS2_HUMAN Isoform 2 of Ribose-phosphate pyrophosphokinase 2 OS=Homo sapiens GN=PRPS2                                                                                                                            |           | 27.09   |
| P11908-2;B2R860;P11908-2   | 2 PRPS2_HUMAN Isoform 2 of Ribose-phosphate pyrophosphokinase 2 OS=Homo sapiens GN=PRPS2;>tr B2R860 B2R860_HUMAN Ribose-phosphate pyrophosphokinase 2 OS=Homo sapiens GN=PRPS2                                    | 2.39E-32  |         |
| P11926                     | DCOR_HUMAN Ornithine decarboxylase OS=Homo sapiens GN=ODC1 PE=1 SV=2                                                                                                                                              |           |         |
| P11940                     | PABP1_HUMAN Polyadenylate-binding protein 1 OS=Homo sapiens GN=PABPC1 PE=1 SV=2                                                                                                                                   |           | 1822.41 |
| P11940-2                   | PABP1_HUMAN Isoform 2 of Polyadenylate-binding protein 1 OS=Homo sapiens GN=PABPC1                                                                                                                                |           | 1822.41 |
| P11940;B4DZW4;P11940-2     | PABP1_HUMAN Polyadenylate-binding protein 1 OS=Homo sapiens GN=PABPC1 PE=1 SV=2;>tr B4DZW4 B4DZW4_HUMAN cDNA FLJ35281 (cDNA FLJ35281) transcript variant 1                                                        | 0         |         |
| P12004                     | PCNA_HUMAN Proliferating cell nuclear antigen OS=Homo sapiens GN=PCNA PE=1 SV=1                                                                                                                                   |           | 533.14  |
| P12035                     | K2C3_HUMAN Keratin, type II cytoskeletal 3 OS=Homo sapiens GN=KRT3 PE=1 SV=3                                                                                                                                      |           | 340.41  |
| P12036                     | NFH_HUMAN Neurofilament heavy polypeptide OS=Homo sapiens GN=NEFH PE=1 SV=4                                                                                                                                       |           | 214.44  |
| P12036-2                   | NFH_HUMAN Isoform 2 of Neurofilament heavy polypeptide OS=Homo sapiens GN=NEFH                                                                                                                                    |           | 206.02  |
| P12036;P12036-2            | NFH_HUMAN Neurofilament heavy polypeptide OS=Homo sapiens GN=NEFH PE=1 SV=4;>sp P12036-2 NFH_HUMAN Isoform 2 of Neurofilament heavy polypeptide OS=Homo sapiens GN=NEFH                                           | 2.86E-30  |         |



|                        |                                                                                                                        |           |         |
|------------------------|------------------------------------------------------------------------------------------------------------------------|-----------|---------|
| P12081                 | SYHC_HUMAN Histidyl-tRNA synthetase, cytoplasmic OS=Homo sapiens GN=HARS PE=1 SV=2                                     |           | 328.67  |
| P12107-2;P12107;P12107 | 2 COBA1_HUMAN Isoform B of Collagen alpha-1(XI) chain OS=Homo sapiens GN=COL11A1;>sp P12107 COBA1_HUMAN Collagen alp   | 2.14E-06  |         |
| P12109                 | CO6A1_HUMAN Collagen alpha-1(VI) chain OS=Homo sapiens GN=COL6A1 PE=1 SV=3                                             | 0         |         |
| P12110                 | CO6A2_HUMAN Collagen alpha-2(VI) chain OS=Homo sapiens GN=COL6A2 PE=1 SV=4                                             |           |         |
| P12110-2               | CO6A2_HUMAN Isoform 2C2A of Collagen alpha-2(VI) chain OS=Homo sapiens GN=COL6A2                                       |           |         |
| P12110-3               | CO6A2_HUMAN Isoform 2C2A' of Collagen alpha-2(VI) chain OS=Homo sapiens GN=COL6A2                                      |           |         |
| P12110;P12110-2;P12110 | CO6A2_HUMAN Collagen alpha-2(VI) chain OS=Homo sapiens GN=COL6A2 PE=1 SV=4;>sp P12110-2 CO6A2_HUMAN Isoform 2C2A       | 0         |         |
| P12111;P12111-2        | CO6A3_HUMAN Collagen alpha-3(VI) chain OS=Homo sapiens GN=COL6A3 PE=1 SV=5;>sp P12111-2 CO6A3_HUMAN Isoform 2 of C     | 0         |         |
| P12235                 | ADT1_HUMAN ADP/ATP translocase 1 OS=Homo sapiens GN=SLC25A4 PE=1 SV=4                                                  |           | 979.22  |
| P12236                 | ADT3_HUMAN ADP/ATP translocase 3 OS=Homo sapiens GN=SLC25A6 PE=1 SV=4                                                  |           | 1085.95 |
| P12259                 | FA5_HUMAN Coagulation factor V OS=Homo sapiens GN=F5 PE=1 SV=4                                                         |           |         |
| P12268                 | IMDH2_HUMAN Inosine-5'-monophosphate dehydrogenase 2 OS=Homo sapiens GN=IMPDH2 PE=1 SV=2                               |           | 205.66  |
| P12270                 | TPR_HUMAN Nucleoprotein TPR OS=Homo sapiens GN=TPR PE=1 SV=3                                                           |           | 1149.68 |
| P12273                 | PIP_HUMAN Prolactin-inducible protein OS=Homo sapiens GN=PIP PE=1 SV=1                                                 |           |         |
| P12277                 | KCRB_HUMAN Creatine kinase B-type OS=Homo sapiens GN=CKB PE=1 SV=1                                                     | 2.57E-23  |         |
| P12429                 | ANXA3_HUMAN Annexin A3 OS=Homo sapiens GN=ANXA3 PE=1 SV=3                                                              |           | 357.49  |
| P12524                 | MYCL1_HUMAN Protein L-Myc-1 OS=Homo sapiens GN=MYCL1 PE=1 SV=2                                                         |           |         |
| P12525                 | MYCL2_HUMAN Protein L-Myc-2 OS=Homo sapiens GN=MYCL2 PE=2 SV=1                                                         |           |         |
| P12532                 | KCRU_HUMAN Creatine kinase U-type, mitochondrial OS=Homo sapiens GN=CKMT1A PE=1 SV=1                                   |           |         |
| P12532-2               | KCRU_HUMAN Isoform 2 of Creatine kinase U-type, mitochondrial OS=Homo sapiens GN=CKMT1A                                |           |         |
| P12532;P12532-2        | KCRU_HUMAN Creatine kinase U-type, mitochondrial OS=Homo sapiens GN=CKMT1A PE=1 SV=1;>sp P12532-2 KCRU_HUMAN Isofor    | 4.90E-94  |         |
| P12643                 | BMP2_HUMAN Bone morphogenetic protein 2 OS=Homo sapiens GN=BMP2 PE=1 SV=1                                              |           |         |
| P12694                 | ODBA_HUMAN 2-oxoisovalerate dehydrogenase subunit alpha, mitochondrial OS=Homo sapiens GN=BCKDHA PE=1 SV=2             | 2.71E-19  |         |
| P12757                 | SKIL_HUMAN Ski-like protein OS=Homo sapiens GN=SKIL PE=1 SV=2                                                          |           |         |
| P12757-2               | SKIL_HUMAN Isoform SNOA of Ski-like protein OS=Homo sapiens GN=SKIL                                                    |           |         |
| P12757-3               | SKIL_HUMAN Isoform SNON2 of Ski-like protein OS=Homo sapiens GN=SKIL                                                   |           |         |
| P12757-4               | SKIL_HUMAN Isoform SNOI of Ski-like protein OS=Homo sapiens GN=SKIL                                                    |           |         |
| P12757-5               | SKIL_HUMAN Isoform 5 of Ski-like protein OS=Homo sapiens GN=SKIL                                                       |           |         |
| P12814                 | ACTN1_HUMAN Alpha-actinin-1 OS=Homo sapiens GN=ACTN1 PE=1 SV=2                                                         |           | 2498.27 |
| P12814-2               | ACTN1_HUMAN Isoform 2 of Alpha-actinin-1 OS=Homo sapiens GN=ACTN1                                                      |           | 2472.44 |
| P12814;P12814-2        | ACTN1_HUMAN Alpha-actinin-1 OS=Homo sapiens GN=ACTN1 PE=1 SV=2;>sp P12814-2 ACTN1_HUMAN Isoform 2 of Alpha-actinin-    | 0         |         |
| P12829                 | MYL4_HUMAN Myosin light chain 4 OS=Homo sapiens GN=MYL4 PE=1 SV=3                                                      |           |         |
| P12830                 | CADH1_HUMAN Cadherin-1 OS=Homo sapiens GN=CDH1 PE=1 SV=3                                                               |           |         |
| P12882                 | MYH1_HUMAN Myosin-1 OS=Homo sapiens GN=MYH1 PE=1 SV=3                                                                  |           | 113.13  |
| P12883                 | MYH7_HUMAN Myosin-7 OS=Homo sapiens GN=MYH7 PE=1 SV=5                                                                  |           | 76.64   |
| P12931                 | SRC_HUMAN Proto-oncogene tyrosine-protein kinase Src OS=Homo sapiens GN=SRC PE=1 SV=3                                  |           | 43.99   |
| P12931-2               | SRC_HUMAN Isoform 2 of Proto-oncogene tyrosine-protein kinase Src OS=Homo sapiens GN=SRC                               |           | 43.99   |
| P12931-2;E1P5V4;P12931 | 2 SRC_HUMAN Isoform 2 of Proto-oncogene tyrosine-protein kinase Src OS=Homo sapiens GN=SRC;>tr E1P5V4 E1P5V4_HUMAN V-s | 5.69E-13  |         |
| P12955                 | PEPD_HUMAN Xaa-Pro dipeptidase OS=Homo sapiens GN=PEPD PE=1 SV=3                                                       |           | 109.04  |
| P12956                 | XRCC6_HUMAN X-ray repair cross-complementing protein 6 OS=Homo sapiens GN=XRCC6 PE=1 SV=2                              |           | 1236.74 |
| P13010                 | XRCC5_HUMAN X-ray repair cross-complementing protein 5 OS=Homo sapiens GN=XRCC5 PE=1 SV=3                              |           | 2210.31 |
| P13051                 | UNG_HUMAN Uracil-DNA glycosylase OS=Homo sapiens GN=UNG PE=1 SV=2                                                      |           | 22.56   |
| P13051-2               | UNG_HUMAN Isoform 1 of Uracil-DNA glycosylase OS=Homo sapiens GN=UNG                                                   |           | 22.56   |
| P13073                 | COX41_HUMAN Cytochrome c oxidase subunit 4 isoform 1, mitochondrial OS=Homo sapiens GN=COX4I1 PE=1 SV=1                |           | 350.18  |
| P13164                 | IFM1_HUMAN Interferon-induced transmembrane protein 1 OS=Homo sapiens GN=IFITM1 PE=1 SV=3                              |           | 202.65  |
| P13284                 | GILT_HUMAN Gamma-interferon-inducible lysosomal thiol reductase OS=Homo sapiens GN=IFI30 PE=1 SV=3                     | 3.23E-43  |         |
| P13473                 | LAMP2_HUMAN Lysosome-associated membrane glycoprotein 2 OS=Homo sapiens GN=LAMP2 PE=1 SV=2                             |           | 159.41  |
| P13473-2               | LAMP2_HUMAN Isoform LAMP-2B of Lysosome-associated membrane glycoprotein 2 OS=Homo sapiens GN=LAMP2                    |           | 159.41  |
| P13473;P13473-2        | LAMP2_HUMAN Lysosome-associated membrane glycoprotein 2 OS=Homo sapiens GN=LAMP2 PE=1 SV=2;>sp P13473-2 LAMP2_HUM      | 2.21E-09  |         |
| P13489                 | RINI_HUMAN Ribonuclease inhibitor OS=Homo sapiens GN=RNH1 PE=1 SV=2                                                    | 9.72E-164 |         |
| P13498                 | CY24A_HUMAN Cytochrome b-245 light chain OS=Homo sapiens GN=CYBA PE=1 SV=3                                             |           | 58.15   |
| P13521                 | SCG2_HUMAN Secretogranin-2 OS=Homo sapiens GN=SCG2 PE=1 SV=2                                                           |           |         |
| P13533                 | MYH6_HUMAN Myosin-6 OS=Homo sapiens GN=MYH6 PE=1 SV=5                                                                  |           | 68.13   |
| P13535                 | MYH8_HUMAN Myosin-8 OS=Homo sapiens GN=MYH8 PE=1 SV=3                                                                  |           | 121.32  |
| P13584                 | CP4B1_HUMAN Cytochrome P450 4B1 OS=Homo sapiens GN=CYP4B1 PE=1 SV=2                                                    |           |         |
| P13584-2               | CP4B1_HUMAN Isoform 2 of Cytochrome P450 4B1 OS=Homo sapiens GN=CYP4B1                                                 |           |         |
| P13611;P13611-5;P13611 | CSPG2_HUMAN Versican core protein OS=Homo sapiens GN=VCAN PE=1 SV=3;>sp P13611-5 CSPG2_HUMAN Isoform Vint of Versica   | 4.01E-195 |         |
| P13637                 | AT1A3_HUMAN Sodium/potassium-translocating ATPase subunit alpha-3 OS=Homo sapiens GN=ATP1A3 PE=1 SV=3                  |           | 1392.63 |
| P13639                 | EF2_HUMAN Elongation factor 2 OS=Homo sapiens GN=EEF2 PE=1 SV=4                                                        |           | 1772.06 |
| P13645                 | K1C10_HUMAN Keratin, type I cytoskeletal 10 OS=Homo sapiens GN=KRT10 PE=1 SV=6                                         |           | 2613.94 |
| P13646                 | K1C13_HUMAN Keratin, type I cytoskeletal 13 OS=Homo sapiens GN=KRT13 PE=1 SV=4                                         |           | 513.67  |

|                        |                                                                                                                                   |           |         |
|------------------------|-----------------------------------------------------------------------------------------------------------------------------------|-----------|---------|
| P13646-2               | K1C13_HUMAN Isoform 2 of Keratin, type I cytoskeletal 13 OS=Homo sapiens GN=KRT13                                                 |           | 451.64  |
| P13646-3               | K1C13_HUMAN Isoform 3 of Keratin, type I cytoskeletal 13 OS=Homo sapiens GN=KRT13                                                 |           | 511.94  |
| P13647                 | K2C5_HUMAN Keratin, type II cytoskeletal 5 OS=Homo sapiens GN=KRT5 PE=1 SV=3                                                      |           | 1184.7  |
| P13667                 | PDIA4_HUMAN Protein disulfide-isomerase A4 OS=Homo sapiens GN=PDIA4 PE=1 SV=2                                                     |           | 1819.04 |
| P13671                 | CO6_HUMAN Complement component C6 OS=Homo sapiens GN=C6 PE=1 SV=3                                                                 |           |         |
| P13674                 | P4HA1_HUMAN Prolyl 4-hydroxylase subunit alpha-1 OS=Homo sapiens GN=P4HA1 PE=1 SV=2                                               |           | 506.63  |
| P13674-2               | P4HA1_HUMAN Isoform 2 of Prolyl 4-hydroxylase subunit alpha-1 OS=Homo sapiens GN=P4HA1                                            |           | 512.59  |
| P13674-2;P13674        | 2 P4HA1_HUMAN Isoform 2 of Prolyl 4-hydroxylase subunit alpha-1 OS=Homo sapiens GN=P4HA1;>sp P13674 P4HA1_HUMAN Prolyl            | 1.16E-82  |         |
| P13674;P13674-2        | P4HA1_HUMAN Prolyl 4-hydroxylase subunit alpha-1 OS=Homo sapiens GN=P4HA1 PE=1 SV=2;>sp P13674-2 P4HA1_HUMAN Isoform              | 0         |         |
| P13693                 | TCTP_HUMAN Translationally-controlled tumor protein OS=Homo sapiens GN=TPT1 PE=1 SV=1                                             |           | 442.94  |
| P13716-2;P13716        | 2 HEM2_HUMAN Isoform 2 of Delta-aminolevulinic acid dehydratase OS=Homo sapiens GN=ALAD;>sp P13716 HEM2_HUMAN Delta-a             | 3.63E-10  |         |
| P13716;B7Z3I9;P13716-2 | HEM2_HUMAN Delta-aminolevulinic acid dehydratase OS=Homo sapiens GN=ALAD PE=1 SV=1;>tr B7Z3I9 B7Z3I9_HUMAN Delta-am               | 2.83E-19  |         |
| P13726                 | TF_HUMAN Tissue factor OS=Homo sapiens GN=F3 PE=1 SV=1                                                                            |           | 220.43  |
| P13746                 | 1A11_HUMAN HLA class I histocompatibility antigen, A-11 alpha chain OS=Homo sapiens GN=HLA-A PE=1 SV=1                            |           | 443.15  |
| P13746-2               | 1A11_HUMAN Isoform 2 of HLA class I histocompatibility antigen, A-11 alpha chain OS=Homo sapiens GN=HLA-A                         |           | 443.15  |
| P13747                 | HLAE_HUMAN HLA class I histocompatibility antigen, alpha chain E OS=Homo sapiens GN=HLA-E PE=1 SV=3                               |           | 112.87  |
| P13760                 | 2B14_HUMAN HLA class II histocompatibility antigen, DRB1-4 beta chain OS=Homo sapiens GN=HLA-DRB1 PE=1 SV=1                       |           | 29.42   |
| P13761                 | 2B17_HUMAN HLA class II histocompatibility antigen, DRB1-7 beta chain OS=Homo sapiens GN=HLA-DRB1 PE=1 SV=1                       |           | 29.42   |
| P13762                 | DRB4_HUMAN HLA class II histocompatibility antigen, DR beta 4 chain OS=Homo sapiens GN=HLA-DRB4 PE=1 SV=2                         | 0         |         |
| P13796                 | PLSL_HUMAN Plastin-2 OS=Homo sapiens GN=LCP1 PE=1 SV=6                                                                            |           | 31.36   |
| P13797                 | PLST_HUMAN Plastin-3 OS=Homo sapiens GN=PLS3 PE=1 SV=4                                                                            |           | 158.55  |
| P13798                 | ACPH_HUMAN Acylamino-acid-releasing enzyme OS=Homo sapiens GN=APEH PE=1 SV=4                                                      | 2.86E-18  |         |
| P13804                 | ETFA_HUMAN Electron transfer flavoprotein subunit alpha, mitochondrial OS=Homo sapiens GN=ETFA PE=1 SV=1                          |           | 616.04  |
| P13807                 | GYS1_HUMAN Glycogen [starch] synthase, muscle OS=Homo sapiens GN=GYS1 PE=1 SV=2                                                   | 1.17E-12  |         |
| P13861                 | KAP2_HUMAN cAMP-dependent protein kinase type II-alpha regulatory subunit OS=Homo sapiens GN=PRKAR2A PE=1 SV=2                    |           | 40.92   |
| P13928                 | ANXA8_HUMAN Annexin A8 OS=Homo sapiens GN=ANXA8 PE=1 SV=3                                                                         |           |         |
| P13929                 | ENOB_HUMAN Beta-enolase OS=Homo sapiens GN=ENO3 PE=1 SV=4                                                                         |           | 452.13  |
| P13929-2               | ENOB_HUMAN Isoform 2 of Beta-enolase OS=Homo sapiens GN=ENO3                                                                      |           | 452.13  |
| P13929-3               | ENOB_HUMAN Isoform 3 of Beta-enolase OS=Homo sapiens GN=ENO3                                                                      |           | 452.13  |
| P13929;P13929-2;P13929 | ENOB_HUMAN Beta-enolase OS=Homo sapiens GN=ENO3 PE=1 SV=4;>sp P13929-2 ENOB_HUMAN Isoform 2 of Beta-enolase OS=H                  | 1.62E-251 |         |
| P13984                 | T2FB_HUMAN General transcription factor IIF subunit 2 OS=Homo sapiens GN=GTF2F2 PE=1 SV=2                                         |           | 179.11  |
| P13987                 | CD59_HUMAN CD59 glycoprotein OS=Homo sapiens GN=CD59 PE=1 SV=1                                                                    |           | 227.86  |
| P13995                 | MTDC_HUMAN Bifunctional methylenetetrahydrofolate dehydrogenase/cyclohydrolase, mitochondrial OS=Homo sapiens GN=MTHFD2 PE=1 SV=2 |           |         |
| P14060                 | 3BHS1_HUMAN 3 beta-hydroxysteroid dehydrogenase/Delta 5-->4-isomerase type 1 OS=Homo sapiens GN=HSD3B1 PE=1 SV=2                  |           | 22.67   |
| P14136                 | GFAP_HUMAN Glial fibrillary acidic protein OS=Homo sapiens GN=GFAP PE=1 SV=1                                                      |           | 90.26   |
| P14136-2               | GFAP_HUMAN Isoform 2 of Glial fibrillary acidic protein OS=Homo sapiens GN=GFAP                                                   |           | 90.26   |
| P14136-3               | GFAP_HUMAN Isoform 3 of Glial fibrillary acidic protein OS=Homo sapiens GN=GFAP                                                   |           | 90.26   |
| P14174                 | MIF_HUMAN Macrophage migration inhibitory factor OS=Homo sapiens GN=MIF PE=1 SV=4                                                 |           | 231.01  |
| P14209                 | CD99_HUMAN CD99 antigen OS=Homo sapiens GN=CD99 PE=1 SV=1                                                                         |           | 50.38   |
| P14314                 | GLU2B_HUMAN Glucosidase 2 subunit beta OS=Homo sapiens GN=PRKCSH PE=1 SV=2                                                        |           | 903.23  |
| P14317                 | HCLS1_HUMAN Hematopoietic lineage cell-specific protein OS=Homo sapiens GN=HCLS1 PE=1 SV=3                                        | 8.38E-167 |         |
| P14324                 | FPPS_HUMAN Farnesyl pyrophosphate synthase OS=Homo sapiens GN=FDPS PE=1 SV=4                                                      |           | 111.87  |
| P14384                 | CBPM_HUMAN Carboxypeptidase M OS=Homo sapiens GN=CPM PE=1 SV=2                                                                    |           |         |
| P14406                 | CX7A2_HUMAN Cytochrome c oxidase subunit 7A2, mitochondrial OS=Homo sapiens GN=COX7A2 PE=1 SV=1                                   |           | 52.89   |
| P14410                 | SUIS_HUMAN Sucrase-isomaltase, intestinal OS=Homo sapiens GN=SI PE=1 SV=6                                                         |           |         |
| P14543;P14543-2        | NID1_HUMAN Nidogen-1 OS=Homo sapiens GN=NID1 PE=1 SV=3;>sp P14543-2 NID1_HUMAN Isoform 2 of Nidogen-1 OS=Homo sa                  | 5.11E-160 |         |
| P14550                 | AK1A1_HUMAN Alcohol dehydrogenase [NADP+] OS=Homo sapiens GN=AKR1A1 PE=1 SV=3                                                     |           | 43.59   |
| P14616                 | INSRR_HUMAN Insulin receptor-related protein OS=Homo sapiens GN=INSRR PE=2 SV=2                                                   |           |         |
| P14618                 | KPYM_HUMAN Pyruvate kinase isozymes M1/M2 OS=Homo sapiens GN=PKM2 PE=1 SV=4                                                       |           | 2072.91 |
| P14618-2               | KPYM_HUMAN Isoform M1 of Pyruvate kinase isozymes M1/M2 OS=Homo sapiens GN=PKM2                                                   |           | 1788.15 |
| P14618-2;B4DRT3;Q504U  | 2 KPYM_HUMAN Isoform M1 of Pyruvate kinase isozymes M1/M2 OS=Homo sapiens GN=PKM2;>tr B4DRT3 B4DRT3_HUMAN Pyruvate                | 0         |         |
| P14618;B4DUU6;B4DNK4;  | KPYM_HUMAN Pyruvate kinase isozymes M1/M2 OS=Homo sapiens GN=PKM2 PE=1 SV=4;>tr B4DUU6 B4DUU6_HUMAN Pyruvate kin                  | 0         |         |
| P14621                 | ACYP2_HUMAN Acylphosphatase-2 OS=Homo sapiens GN=ACYP2 PE=1 SV=2                                                                  | 2.14E-41  |         |
| P14625                 | ENPL_HUMAN Endoplasmic reticulum protein OS=Homo sapiens GN=HSP90B1 PE=1 SV=1                                                     |           | 2600.82 |
| P14635                 | CCNB1_HUMAN G2/mitotic-specific cyclin-B1 OS=Homo sapiens GN=CCNB1 PE=1 SV=1                                                      |           |         |
| P14649                 | MYL6B_HUMAN Myosin light chain 6B OS=Homo sapiens GN=MYL6B PE=1 SV=1                                                              |           | 195.19  |
| P14678                 | RSMB_HUMAN Small nuclear ribonucleoprotein-associated proteins B and B' OS=Homo sapiens GN=SNRNPB PE=1 SV=2                       |           | 494.76  |
| P14678-2               | RSMB_HUMAN Isoform SM-B of Small nuclear ribonucleoprotein-associated proteins B and B' OS=Homo sapiens GN=SNRNPB                 |           | 495.35  |
| P14678-3               | RSMB_HUMAN Isoform SM-B1 of Small nuclear ribonucleoprotein-associated proteins B and B' OS=Homo sapiens GN=SNRNPB                |           | 494.76  |
| P14678-3;A8MT02;Q1518; | 3 RSMB_HUMAN Isoform SM-B1 of Small nuclear ribonucleoprotein-associated proteins B and B OS=Homo sapiens GN=SNRNPB;>tr A8        | 9.50E-40  |         |
| P14735                 | IDE_HUMAN Insulin-degrading enzyme OS=Homo sapiens GN=IDE PE=1 SV=4                                                               |           |         |

|                        |                                                                                                                            |           |         |
|------------------------|----------------------------------------------------------------------------------------------------------------------------|-----------|---------|
| P14780                 | MMP9_HUMAN Matrix metalloproteinase-9 OS=Homo sapiens GN=MMP9 PE=1 SV=3                                                    | 2.50E-37  |         |
| P14854                 | CX6B1_HUMAN Cytochrome c oxidase subunit 6B1 OS=Homo sapiens GN=COX6B1 PE=1 SV=2                                           |           | 146.85  |
| P14859-2;P14859;P14859 | 2 PO2F1_HUMAN Isoform 2 of POU domain, class 2, transcription factor 1 OS=Homo sapiens GN=POU2F1;>sp P14859 PO2F1_HUMAN    | 2.37E-12  |         |
| P14866                 | HNRPL_HUMAN Heterogeneous nuclear ribonucleoprotein L OS=Homo sapiens GN=HNRNPL PE=1 SV=2                                  |           | 530.51  |
| P14868                 | SYDC_HUMAN Aspartyl-tRNA synthetase, cytoplasmic OS=Homo sapiens GN=DARS PE=1 SV=2                                         |           | 831.82  |
| P14921;P14921-2        | ETS1_HUMAN Protein C-ets-1 OS=Homo sapiens GN=ETS1 PE=1 SV=1;>sp P14921-2 ETS1_HUMAN Isoform c-ETS-1B of Protein C-ets     | 8.78E-14  |         |
| P14923                 | PLAK_HUMAN Junction plakoglobin OS=Homo sapiens GN=JUP PE=1 SV=3                                                           |           | 69.84   |
| P14927                 | QCR7_HUMAN Cytochrome b-c1 complex subunit 7 OS=Homo sapiens GN=UQCRB PE=1 SV=2                                            |           | 61.15   |
| P15086                 | CBPB1_HUMAN Carboxypeptidase B OS=Homo sapiens GN=CPB1 PE=1 SV=4                                                           | 0         |         |
| P15088                 | CBPA3_HUMAN Mast cell carboxypeptidase A OS=Homo sapiens GN=CPA3 PE=1 SV=2                                                 | 1.48E-48  |         |
| P15090                 | FABP4_HUMAN Fatty acid-binding protein, adipocyte OS=Homo sapiens GN=FABP4 PE=1 SV=3                                       | 1.15E-145 |         |
| P15104                 | GLNA_HUMAN Glutamine synthetase OS=Homo sapiens GN=GLUL PE=1 SV=4                                                          | 1.48E-112 |         |
| P15121                 | ALDR_HUMAN Aldose reductase OS=Homo sapiens GN=AKR1B1 PE=1 SV=3                                                            |           | 241.51  |
| P15144                 | AMPN_HUMAN Aminopeptidase N OS=Homo sapiens GN=ANPEP PE=1 SV=4                                                             | 9.94E-152 |         |
| P15151                 | PVR_HUMAN Poliovirus receptor OS=Homo sapiens GN=PVR PE=1 SV=2                                                             |           | 157.37  |
| P15151-2               | PVR_HUMAN Isoform Beta of Poliovirus receptor OS=Homo sapiens GN=PVR                                                       |           | 157.37  |
| P15151-3               | PVR_HUMAN Isoform Gamma of Poliovirus receptor OS=Homo sapiens GN=PVR                                                      |           | 157.37  |
| P15151-4               | PVR_HUMAN Isoform Delta of Poliovirus receptor OS=Homo sapiens GN=PVR                                                      |           | 157.37  |
| P15151;P15151-2;P15151 | PVR_HUMAN Poliovirus receptor OS=Homo sapiens GN=PVR PE=1 SV=2;>sp P15151-2 PVR_HUMAN Isoform Beta of Poliovirus recept    | 1.23E-31  |         |
| P15153                 | RAC2_HUMAN Ras-related C3 botulinum toxin substrate 2 OS=Homo sapiens GN=RAC2 PE=1 SV=1                                    |           | 347.8   |
| P15170                 | ERF3A_HUMAN Eukaryotic peptide chain release factor GTP-binding subunit ERF3A OS=Homo sapiens GN=GSPT1 PE=1 SV=1           | 1.85E-47  |         |
| P15259                 | PGAM2_HUMAN Phosphoglycerate mutase 2 OS=Homo sapiens GN=PGAM2 PE=1 SV=3                                                   |           | 218.7   |
| P15289                 | ARSA_HUMAN Arylsulfatase A OS=Homo sapiens GN=ARSA PE=1 SV=3                                                               | 7.78E-17  |         |
| P15291                 | B4GT1_HUMAN Beta-1,4-galactosyltransferase 1 OS=Homo sapiens GN=B4GALT1 PE=1 SV=5                                          |           | 45.33   |
| P15291-2               | B4GT1_HUMAN Isoform Short of Beta-1,4-galactosyltransferase 1 OS=Homo sapiens GN=B4GALT1                                   |           | 45.88   |
| P15311                 | EZRI_HUMAN Ezrin OS=Homo sapiens GN=EZR PE=1 SV=4                                                                          |           | 2489.77 |
| P15374                 | UCHL3_HUMAN Ubiquitin carboxyl-terminal hydrolase isozyme L3 OS=Homo sapiens GN=UCHL3 PE=1 SV=1                            | 2.35E-48  |         |
| P15407                 | FOSL1_HUMAN Fos-related antigen 1 OS=Homo sapiens GN=FOSL1 PE=1 SV=1                                                       |           | 81.31   |
| P15408                 | FOSL2_HUMAN Fos-related antigen 2 OS=Homo sapiens GN=FOSL2 PE=1 SV=1                                                       |           |         |
| P15408-2               | FOSL2_HUMAN Isoform 2 of Fos-related antigen 2 OS=Homo sapiens GN=FOSL2                                                    |           |         |
| P15498                 | VAV_HUMAN Proto-oncogene vav OS=Homo sapiens GN=VAV1 PE=1 SV=4                                                             | 9.20E-13  |         |
| P15509                 | CSF2R_HUMAN Granulocyte-macrophage colony-stimulating factor receptor subunit alpha OS=Homo sapiens GN=CSF2RA PE=1 SV=1    |           | 46.46   |
| P15509-2               | CSF2R_HUMAN Isoform 2 of Granulocyte-macrophage colony-stimulating factor receptor subunit alpha OS=Homo sapiens GN=CSF2RA |           | 46.46   |
| P15509-2;P15509;P15509 | 2 CSF2R_HUMAN Isoform 2 of Granulocyte-macrophage colony-stimulating factor receptor subunit alpha OS=Homo sapiens GN=CSF2 | 6.84E-06  |         |
| P15509-3               | CSF2R_HUMAN Isoform 3 of Granulocyte-macrophage colony-stimulating factor receptor subunit alpha OS=Homo sapiens GN=CSF2RA |           | 46.46   |
| P15509-4               | CSF2R_HUMAN Isoform 4 of Granulocyte-macrophage colony-stimulating factor receptor subunit alpha OS=Homo sapiens GN=CSF2RA |           | 46.46   |
| P15509-5               | CSF2R_HUMAN Isoform 5 of Granulocyte-macrophage colony-stimulating factor receptor subunit alpha OS=Homo sapiens GN=CSF2RA |           | 46.46   |
| P15509-6               | CSF2R_HUMAN Isoform 6 of Granulocyte-macrophage colony-stimulating factor receptor subunit alpha OS=Homo sapiens GN=CSF2RA |           | 37.92   |
| P15529                 | MCP_HUMAN Membrane cofactor protein OS=Homo sapiens GN=CD46 PE=1 SV=3                                                      |           | 193.07  |
| P15529-10              | MCP_HUMAN Isoform 2 of Membrane cofactor protein OS=Homo sapiens GN=CD46                                                   |           | 193.07  |
| P15529-11              | MCP_HUMAN Isoform C of Membrane cofactor protein OS=Homo sapiens GN=CD46                                                   |           | 193.07  |
| P15529-12              | MCP_HUMAN Isoform E of Membrane cofactor protein OS=Homo sapiens GN=CD46                                                   |           | 193.07  |
| P15529-13              | MCP_HUMAN Isoform G of Membrane cofactor protein OS=Homo sapiens GN=CD46                                                   |           | 193.07  |
| P15529-14              | MCP_HUMAN Isoform I of Membrane cofactor protein OS=Homo sapiens GN=CD46                                                   |           | 193.07  |
| P15529-15              | MCP_HUMAN Isoform K of Membrane cofactor protein OS=Homo sapiens GN=CD46                                                   |           | 193.07  |
| P15529-16              | MCP_HUMAN Isoform 3 of Membrane cofactor protein OS=Homo sapiens GN=CD46                                                   |           | 188.44  |
| P15529-2               | MCP_HUMAN Isoform B of Membrane cofactor protein OS=Homo sapiens GN=CD46                                                   |           | 210.2   |
| P15529-2;P15529-5;P155 | 2 MCP_HUMAN Isoform B of Membrane cofactor protein OS=Homo sapiens GN=CD46;>sp P15529-5 MCP_HUMAN Isoform H of Memb        | 5.18E-10  |         |
| P15529-3               | MCP_HUMAN Isoform D of Membrane cofactor protein OS=Homo sapiens GN=CD46                                                   |           | 210.2   |
| P15529-4               | MCP_HUMAN Isoform F of Membrane cofactor protein OS=Homo sapiens GN=CD46                                                   |           | 210.2   |
| P15529-5               | MCP_HUMAN Isoform H of Membrane cofactor protein OS=Homo sapiens GN=CD46                                                   |           | 210.2   |
| P15529-6               | MCP_HUMAN Isoform J of Membrane cofactor protein OS=Homo sapiens GN=CD46                                                   |           | 210.2   |
| P15529-7               | MCP_HUMAN Isoform L of Membrane cofactor protein OS=Homo sapiens GN=CD46                                                   |           | 210.2   |
| P15529-8               | MCP_HUMAN Isoform M of Membrane cofactor protein OS=Homo sapiens GN=CD46                                                   |           | 178.12  |
| P15529-9               | MCP_HUMAN Isoform N of Membrane cofactor protein OS=Homo sapiens GN=CD46                                                   |           | 178.12  |
| P15531                 | NDKA_HUMAN Nucleoside diphosphate kinase A OS=Homo sapiens GN=NME1 PE=1 SV=1                                               |           | 640.93  |
| P15531-2               | NDKA_HUMAN Isoform 2 of Nucleoside diphosphate kinase A OS=Homo sapiens GN=NME1                                            |           | 640.93  |
| P15531-2;P15531        | 2 NDKA_HUMAN Isoform 2 of Nucleoside diphosphate kinase A OS=Homo sapiens GN=NME1;>sp P15531 NDKA_HUMAN Nucleoside c       | 1.17E-155 |         |
| P15538                 | C11B1_HUMAN Cytochrome P450 11B1, mitochondrial OS=Homo sapiens GN=CYP11B1 PE=1 SV=5                                       |           |         |
| P15559                 | NQO1_HUMAN NAD(P)H dehydrogenase [quinone] 1 OS=Homo sapiens GN=NQO1 PE=1 SV=1                                             | 7.33E-74  |         |
| P15586                 | GNS_HUMAN N-acetylglucosamine-6-sulfatase OS=Homo sapiens GN=GNS PE=1 SV=3                                                 |           | 116.73  |

|                        |                                                                                                                        |           |         |
|------------------------|------------------------------------------------------------------------------------------------------------------------|-----------|---------|
| P15692                 | VEGFA_HUMAN Vascular endothelial growth factor A OS=Homo sapiens GN=VEGFA PE=1 SV=2                                    |           | 18.83   |
| P15692-10              | VEGFA_HUMAN Isoform VEGF111 of Vascular endothelial growth factor A OS=Homo sapiens GN=VEGFA                           |           | 18.83   |
| P15692-11              | VEGFA_HUMAN Isoform L-VEGF165 of Vascular endothelial growth factor A OS=Homo sapiens GN=VEGFA                         |           | 20.62   |
| P15692-12              | VEGFA_HUMAN Isoform L-VEGF121 of Vascular endothelial growth factor A OS=Homo sapiens GN=VEGFA                         |           | 20.62   |
| P15692-13              | VEGFA_HUMAN Isoform L-VEGF189 of Vascular endothelial growth factor A OS=Homo sapiens GN=VEGFA                         |           | 20.62   |
| P15692-14              | VEGFA_HUMAN Isoform L-VEGF206 of Vascular endothelial growth factor A OS=Homo sapiens GN=VEGFA                         |           | 20.62   |
| P15692-2               | VEGFA_HUMAN Isoform VEGF189 of Vascular endothelial growth factor A OS=Homo sapiens GN=VEGFA                           |           | 18.83   |
| P15692-3               | VEGFA_HUMAN Isoform VEGF183 of Vascular endothelial growth factor A OS=Homo sapiens GN=VEGFA                           |           | 18.83   |
| P15692-4               | VEGFA_HUMAN Isoform VEGF165 of Vascular endothelial growth factor A OS=Homo sapiens GN=VEGFA                           |           | 18.83   |
| P15692-5               | VEGFA_HUMAN Isoform VEGF148 of Vascular endothelial growth factor A OS=Homo sapiens GN=VEGFA                           |           | 18.83   |
| P15692-6               | VEGFA_HUMAN Isoform VEGF145 of Vascular endothelial growth factor A OS=Homo sapiens GN=VEGFA                           |           | 18.83   |
| P15692-8               | VEGFA_HUMAN Isoform VEGF165B of Vascular endothelial growth factor A OS=Homo sapiens GN=VEGFA                          |           | 18.83   |
| P15692-9               | VEGFA_HUMAN Isoform VEGF121 of Vascular endothelial growth factor A OS=Homo sapiens GN=VEGFA                           |           | 18.83   |
| P15814                 | IGLL1_HUMAN Immunoglobulin lambda-like polypeptide 1 OS=Homo sapiens GN=IGLL1 PE=1 SV=1                                | 8.52E-08  |         |
| P15822                 | ZEP1_HUMAN Zinc finger protein 40 OS=Homo sapiens GN=HIVEP1 PE=1 SV=3                                                  |           |         |
| P15880                 | RS2_HUMAN 40S ribosomal protein S2 OS=Homo sapiens GN=RPS2 PE=1 SV=2                                                   |           | 1107.64 |
| P15918                 | RAG1_HUMAN V(D)J recombination-activating protein 1 OS=Homo sapiens GN=RAG1 PE=1 SV=2                                  |           |         |
| P15923                 | TFE2_HUMAN Transcription factor E2-alpha OS=Homo sapiens GN=TCF3 PE=1 SV=1                                             |           |         |
| P15923-2               | TFE2_HUMAN Isoform E47 of Transcription factor E2-alpha OS=Homo sapiens GN=TCF3                                        |           |         |
| P15924                 | DESP_HUMAN Desmoplakin OS=Homo sapiens GN=DSP PE=1 SV=3                                                                |           | 156.18  |
| P15924-2               | DESP_HUMAN Isoform DPII of Desmoplakin OS=Homo sapiens GN=DSP                                                          |           | 113.8   |
| P15924;D7RX09;Q4LE79;I | DESP_HUMAN Desmoplakin OS=Homo sapiens GN=DSP PE=1 SV=3;>tr D7RX09 D7RX09_HUMAN Desmoplakin Ia OS=Homo sapiens         | 0         |         |
| P15927                 | RFA2_HUMAN Replication protein A 32 kDa subunit OS=Homo sapiens GN=RPA2 PE=1 SV=1                                      |           | 267.91  |
| P15927-2               | RFA2_HUMAN Isoform 2 of Replication protein A 32 kDa subunit OS=Homo sapiens GN=RPA2                                   |           | 267.91  |
| P15927-3               | RFA2_HUMAN Isoform 3 of Replication protein A 32 kDa subunit OS=Homo sapiens GN=RPA2                                   |           | 267.91  |
| P15927-3;P15927-2;B2R7 | 3 RFA2_HUMAN Isoform 3 of Replication protein A 32 kDa subunit OS=Homo sapiens GN=RPA2;>sp P15927-2 RFA2_HUMAN Isoform | 4.37E-23  |         |
| P15941                 | MUC1_HUMAN Mucin-1 OS=Homo sapiens GN=MUC1 PE=1 SV=3                                                                   |           |         |
| P15941-10              | MUC1_HUMAN Isoform 10 of Mucin-1 OS=Homo sapiens GN=MUC1                                                               |           |         |
| P15941-2               | MUC1_HUMAN Isoform 2 of Mucin-1 OS=Homo sapiens GN=MUC1                                                                |           |         |
| P15941-2;P15941;P15941 | 2 MUC1_HUMAN Isoform 2 of Mucin-1 OS=Homo sapiens GN=MUC1;>sp P15941 MUC1_HUMAN Mucin-1 OS=Homo sapiens GN=MUC         | 2.35E-105 |         |
| P15941-3               | MUC1_HUMAN Isoform 3 of Mucin-1 OS=Homo sapiens GN=MUC1                                                                |           |         |
| P15941-4               | MUC1_HUMAN Isoform 4 of Mucin-1 OS=Homo sapiens GN=MUC1                                                                |           |         |
| P15941-6               | MUC1_HUMAN Isoform 6 of Mucin-1 OS=Homo sapiens GN=MUC1                                                                |           |         |
| P15941-7               | MUC1_HUMAN Isoform 7 of Mucin-1 OS=Homo sapiens GN=MUC1                                                                |           |         |
| P15941-8               | MUC1_HUMAN Isoform 8 of Mucin-1 OS=Homo sapiens GN=MUC1                                                                |           |         |
| P15941-9               | MUC1_HUMAN Isoform 9 of Mucin-1 OS=Homo sapiens GN=MUC1                                                                |           |         |
| P15954                 | COX7C_HUMAN Cytochrome c oxidase subunit 7C, mitochondrial OS=Homo sapiens GN=COX7C PE=1 SV=1                          |           |         |
| P16035                 | TIMP2_HUMAN Metalloproteinase inhibitor 2 OS=Homo sapiens GN=TIMP2 PE=1 SV=2                                           |           | 63.67   |
| P16066                 | ANPRA_HUMAN Atrial natriuretic peptide receptor 1 OS=Homo sapiens GN=NPR1 PE=1 SV=1                                    |           |         |
| P16070                 | CD44_HUMAN CD44 antigen OS=Homo sapiens GN=CD44 PE=1 SV=3                                                              |           | 788.23  |
| P16070-10              | CD44_HUMAN Isoform 10 of CD44 antigen OS=Homo sapiens GN=CD44                                                          |           | 788.23  |
| P16070-11              | CD44_HUMAN Isoform 11 of CD44 antigen OS=Homo sapiens GN=CD44                                                          |           | 788.23  |
| P16070-12              | CD44_HUMAN Isoform 12 of CD44 antigen OS=Homo sapiens GN=CD44                                                          |           | 788.23  |
| P16070-13              | CD44_HUMAN Isoform 13 of CD44 antigen OS=Homo sapiens GN=CD44                                                          |           | 788.23  |
| P16070-14              | CD44_HUMAN Isoform 14 of CD44 antigen OS=Homo sapiens GN=CD44                                                          |           | 788.51  |
| P16070-15              | CD44_HUMAN Isoform 15 of CD44 antigen OS=Homo sapiens GN=CD44                                                          |           | 246.83  |
| P16070-16              | CD44_HUMAN Isoform 16 of CD44 antigen OS=Homo sapiens GN=CD44                                                          |           | 788.23  |
| P16070-17              | CD44_HUMAN Isoform 17 of CD44 antigen OS=Homo sapiens GN=CD44                                                          |           | 788.23  |
| P16070-3               | CD44_HUMAN Isoform 3 of CD44 antigen OS=Homo sapiens GN=CD44                                                           |           | 788.23  |
| P16070-4               | CD44_HUMAN Isoform 4 of CD44 antigen OS=Homo sapiens GN=CD44                                                           |           | 788.23  |
| P16070-5               | CD44_HUMAN Isoform 5 of CD44 antigen OS=Homo sapiens GN=CD44                                                           |           | 788.23  |
| P16070-6               | CD44_HUMAN Isoform 6 of CD44 antigen OS=Homo sapiens GN=CD44                                                           |           | 788.23  |
| P16070-7               | CD44_HUMAN Isoform 7 of CD44 antigen OS=Homo sapiens GN=CD44                                                           |           | 788.23  |
| P16070-8               | CD44_HUMAN Isoform 8 of CD44 antigen OS=Homo sapiens GN=CD44                                                           |           | 788.23  |
| P16070-9               | CD44_HUMAN Isoform 9 of CD44 antigen OS=Homo sapiens GN=CD44                                                           |           | 246.83  |
| P16070;P16070-5;P16070 | CD44_HUMAN CD44 antigen OS=Homo sapiens GN=CD44 PE=1 SV=3;>sp P16070-5 CD44_HUMAN Isoform 5 of CD44 antigen OS=H       | 5.47E-220 |         |
| P16083                 | NQO2_HUMAN Ribosylidihydroxynicotinamide dehydrogenase [quinone] OS=Homo sapiens GN=NQO2 PE=1 SV=5                     | 2.49E-63  |         |
| P16104                 | H2AX_HUMAN Histone H2A.x OS=Homo sapiens GN=H2AFX PE=1 SV=2                                                            |           | 145.19  |
| P16144                 | ITB4_HUMAN Integrin beta-4 OS=Homo sapiens GN=ITGB4 PE=1 SV=5                                                          |           | 215.73  |
| P16144-2               | ITB4_HUMAN Isoform Beta-4A of Integrin beta-4 OS=Homo sapiens GN=ITGB4                                                 |           | 215.73  |
| P16144-3               | ITB4_HUMAN Isoform Beta-4B of Integrin beta-4 OS=Homo sapiens GN=ITGB4                                                 |           | 215.73  |

|                        |                                                                                                                               |           |         |
|------------------------|-------------------------------------------------------------------------------------------------------------------------------|-----------|---------|
| P16144-4               | ITB4_HUMAN Isoform Beta-4D of Integrin beta-4 OS=Homo sapiens GN=ITGB4                                                        |           | 215.73  |
| P16144-5               | ITB4_HUMAN Isoform Beta-4E of Integrin beta-4 OS=Homo sapiens GN=ITGB4                                                        |           | 19.35   |
| P16144;P16144-3;A0AVL6 | ITB4_HUMAN Integrin beta-4 OS=Homo sapiens GN=ITGB4 PE=1 SV=5;>sp P16144-3 ITB4_HUMAN Isoform Beta-4B of Integrin beta-4      | 3.98E-48  |         |
| P16150                 | LEUK_HUMAN Leukosialin OS=Homo sapiens GN=SPN PE=1 SV=1                                                                       |           | 23.51   |
| P16152                 | CBR1_HUMAN Carbonyl reductase [NADPH] 1 OS=Homo sapiens GN=CBR1 PE=1 SV=3                                                     |           | 160.5   |
| P16188                 | 1A30_HUMAN HLA class I histocompatibility antigen, A-30 alpha chain OS=Homo sapiens GN=HLA-A PE=1 SV=2                        |           | 521.97  |
| P16189                 | 1A31_HUMAN HLA class I histocompatibility antigen, A-31 alpha chain OS=Homo sapiens GN=HLA-A PE=2 SV=2                        |           | 599.27  |
| P16190                 | 1A33_HUMAN HLA class I histocompatibility antigen, A-33 alpha chain OS=Homo sapiens GN=HLA-A PE=1 SV=3                        |           | 541.14  |
| P16219                 | ACADS_HUMAN Short-chain specific acyl-CoA dehydrogenase, mitochondrial OS=Homo sapiens GN=ACADS PE=1 SV=1                     | 3.28E-08  |         |
| P16220                 | CREB1_HUMAN Cyclic AMP-responsive element-binding protein 1 OS=Homo sapiens GN=CREB1 PE=1 SV=2                                |           | 18.55   |
| P16220-2               | CREB1_HUMAN Isoform CREB-B of Cyclic AMP-responsive element-binding protein 1 OS=Homo sapiens GN=CREB1                        |           | 18.55   |
| P16260                 | GDC_HUMAN Graves disease carrier protein OS=Homo sapiens GN=SLC25A16 PE=2 SV=3                                                |           |         |
| P16278                 | BGAL_HUMAN Beta-galactosidase OS=Homo sapiens GN=GLB1 PE=1 SV=2                                                               |           | 76.49   |
| P16278-2               | BGAL_HUMAN Isoform 2 of Beta-galactosidase OS=Homo sapiens GN=GLB1                                                            |           | 56.09   |
| P16278-3               | BGAL_HUMAN Isoform 3 of Beta-galactosidase OS=Homo sapiens GN=GLB1                                                            |           | 76.49   |
| P16278;P16278-3;P16278 | BGAL_HUMAN Beta-galactosidase OS=Homo sapiens GN=GLB1 PE=1 SV=2;>sp P16278-3 BGAL_HUMAN Isoform 3 of Beta-galactosidase       | 1.20E-23  |         |
| P16284;P16284-6;P16284 | PECA1_HUMAN Platelet endothelial cell adhesion molecule OS=Homo sapiens GN=PECAM1 PE=1 SV=1;>sp P16284-6 PECA1_HUMAN          | 6.62E-06  |         |
| P16298                 | PP2BB_HUMAN Serine/threonine-protein phosphatase 2B catalytic subunit beta isoform OS=Homo sapiens GN=PPP3CB PE=1 SV=2        |           | 64.47   |
| P16298-2               | PP2BB_HUMAN Isoform 2 of Serine/threonine-protein phosphatase 2B catalytic subunit beta isoform OS=Homo sapiens GN=PPP3CB     |           | 64.47   |
| P16298-3               | PP2BB_HUMAN Isoform 3 of Serine/threonine-protein phosphatase 2B catalytic subunit beta isoform OS=Homo sapiens GN=PPP3CB     |           | 64.47   |
| P16333                 | NCK1_HUMAN Cytoplasmic protein NCK1 OS=Homo sapiens GN=NCK1 PE=1 SV=1                                                         | 6.72E-10  |         |
| P16383                 | GCF_HUMAN GC-rich sequence DNA-binding factor OS=Homo sapiens GN=TCF9 PE=1 SV=2                                               |           | 25.75   |
| P16383-2               | GCF_HUMAN Isoform 2 of GC-rich sequence DNA-binding factor OS=Homo sapiens GN=TCF9                                            |           | 25.75   |
| P16401                 | H15_HUMAN Histone H1.5 OS=Homo sapiens GN=HIST1H1B PE=1 SV=3                                                                  |           | 20.3    |
| P16402                 | H13_HUMAN Histone H1.3 OS=Homo sapiens GN=HIST1H1D PE=1 SV=2                                                                  |           | 488.18  |
| P16403                 | H12_HUMAN Histone H1.2 OS=Homo sapiens GN=HIST1H1C PE=1 SV=2                                                                  |           | 515.77  |
| P16422                 | EPCAM_HUMAN Epithelial cell adhesion molecule OS=Homo sapiens GN=EPCAM PE=1 SV=2                                              |           | 69.59   |
| P16435                 | NCPOR_HUMAN NADPH--cytochrome P450 reductase OS=Homo sapiens GN=POR PE=1 SV=2                                                 |           | 53.08   |
| P16444                 | DPEP1_HUMAN Dipeptidase 1 OS=Homo sapiens GN=DPEP1 PE=1 SV=3                                                                  |           |         |
| P16455                 | MGMT_HUMAN Methylated-DNA--protein-cysteine methyltransferase OS=Homo sapiens GN=MGMT PE=1 SV=1                               |           |         |
| P16471                 | PRLR_HUMAN Prolactin receptor OS=Homo sapiens GN=PRLR PE=1 SV=1                                                               |           | 29.66   |
| P16471-2               | PRLR_HUMAN Isoform 2 of Prolactin receptor OS=Homo sapiens GN=PRLR                                                            |           | 29.66   |
| P16499                 | PDE6A_HUMAN Rod cGMP-specific 3,5-cyclic phosphodiesterase subunit alpha OS=Homo sapiens GN=PDE6A PE=1 SV=4                   | 1.14E-09  |         |
| P16520                 | GBB3_HUMAN Guanine nucleotide-binding protein G(I)/G(S)/G(T) subunit beta-3 OS=Homo sapiens GN=GNB3 PE=1 SV=1                 |           | 86.07   |
| P16615                 | AT2A2_HUMAN Sarcoplasmic/endoplasmic reticulum calcium ATPase 2 OS=Homo sapiens GN=ATP2A2 PE=1 SV=1                           |           | 1380.67 |
| P16615-2               | AT2A2_HUMAN Isoform 2 of Sarcoplasmic/endoplasmic reticulum calcium ATPase 2 OS=Homo sapiens GN=ATP2A2                        |           | 1363.36 |
| P16615-3               | AT2A2_HUMAN Isoform 3 of Sarcoplasmic/endoplasmic reticulum calcium ATPase 2 OS=Homo sapiens GN=ATP2A2                        |           | 1364.05 |
| P16615-4               | AT2A2_HUMAN Isoform 4 of Sarcoplasmic/endoplasmic reticulum calcium ATPase 2 OS=Homo sapiens GN=ATP2A2                        |           | 1291.34 |
| P16615-5               | AT2A2_HUMAN Isoform 5 of Sarcoplasmic/endoplasmic reticulum calcium ATPase 2 OS=Homo sapiens GN=ATP2A2                        |           | 1363.36 |
| P16615;P16615-3;P16615 | AT2A2_HUMAN Sarcoplasmic/endoplasmic reticulum calcium ATPase 2 OS=Homo sapiens GN=ATP2A2 PE=1 SV=1;>sp P16615-3 AT2A2        | 1.17E-133 |         |
| P16671                 | CD36_HUMAN Platelet glycoprotein 4 OS=Homo sapiens GN=CD36 PE=1 SV=2                                                          |           | 0       |
| P16885                 | PLCG2_HUMAN 1-phosphatidylinositol-4,5-bisphosphate phosphodiesterase gamma-2 OS=Homo sapiens GN=PLCG2 PE=1 SV=4              |           | 0       |
| P16930                 | FAAH_HUMAN Fumarylacetoacetase OS=Homo sapiens GN=FAH PE=1 SV=2                                                               | 8.31E-18  |         |
| P16949                 | STMN1_HUMAN Stathmin OS=Homo sapiens GN=STMN1 PE=1 SV=3                                                                       |           | 370.21  |
| P16949-2               | STMN1_HUMAN Isoform 2 of Stathmin OS=Homo sapiens GN=STMN1                                                                    |           | 343.99  |
| P16949;P16949-2        | STMN1_HUMAN Stathmin OS=Homo sapiens GN=STMN1 PE=1 SV=3;>sp P16949-2 STMN1_HUMAN Isoform 2 of Stathmin OS=Homo sapiens        | 6.49E-107 |         |
| P16989                 | DBPA_HUMAN DNA-binding protein A OS=Homo sapiens GN=CSDA PE=1 SV=4                                                            |           | 448.66  |
| P16989-2               | DBPA_HUMAN Isoform 2 of DNA-binding protein A OS=Homo sapiens GN=CSDA                                                         |           | 386.46  |
| P16989-3               | DBPA_HUMAN Isoform 3 of DNA-binding protein A OS=Homo sapiens GN=CSDA                                                         |           | 391.99  |
| P16989;P16989-3;P16989 | DBPA_HUMAN DNA-binding protein A OS=Homo sapiens GN=CSDA PE=1 SV=4;>sp P16989-3 DBPA_HUMAN Isoform 3 of DNA-binding protein A | 6.28E-261 |         |
| P17014                 | ZNF12_HUMAN Zinc finger protein 12 OS=Homo sapiens GN=ZNF12 PE=2 SV=3                                                         |           |         |
| P17014-2               | ZNF12_HUMAN Isoform 2 of Zinc finger protein 12 OS=Homo sapiens GN=ZNF12                                                      |           |         |
| P17014-4               | ZNF12_HUMAN Isoform 4 of Zinc finger protein 12 OS=Homo sapiens GN=ZNF12                                                      |           |         |
| P17014-5               | ZNF12_HUMAN Isoform 5 of Zinc finger protein 12 OS=Homo sapiens GN=ZNF12                                                      |           |         |
| P17050                 | NAGAB_HUMAN Alpha-N-acetylgalactosaminidase OS=Homo sapiens GN=NAGA PE=1 SV=2                                                 | 3.89E-08  |         |
| P17066                 | HSP76_HUMAN Heat shock 70 kDa protein 6 OS=Homo sapiens GN=HSPA6 PE=1 SV=2                                                    |           | 327.72  |
| P17081                 | RHOQ_HUMAN Rho-related GTP-binding protein RhoQ OS=Homo sapiens GN=RHOQ PE=1 SV=2                                             |           | 59.44   |
| P17096                 | HMGA1_HUMAN High mobility group protein HMG-I/HMG-Y OS=Homo sapiens GN=HMGA1 PE=1 SV=3                                        |           | 106.31  |
| P17096-2               | HMGA1_HUMAN Isoform HMG-Y of High mobility group protein HMG-I/HMG-Y OS=Homo sapiens GN=HMGA1                                 |           | 22.07   |
| P17096-3               | HMGA1_HUMAN Isoform HMG-R of High mobility group protein HMG-I/HMG-Y OS=Homo sapiens GN=HMGA1                                 |           | 106.31  |
| P17096-3;P17096        | 3 HMGA1_HUMAN Isoform HMG-R of High mobility group protein HMG-I/HMG-Y OS=Homo sapiens GN=HMGA1;>sp P17096 HMGA1_I            | 2.22E-57  |         |



|                        |                                                                                                                         |           |         |
|------------------------|-------------------------------------------------------------------------------------------------------------------------|-----------|---------|
| P17096;P17096-3        | HMGA1_HUMAN High mobility group protein HMG-I/HMG-Y OS=Homo sapiens GN=HMGA1 PE=1 SV=3;>sp P17096-3 HMGA1_HUMAN         | 3.92E-37  |         |
| P17152                 | TMM11_HUMAN Transmembrane protein 11, mitochondrial OS=Homo sapiens GN=TMEM11 PE=1 SV=1                                 | 4.01E-06  |         |
| P17174                 | AATC_HUMAN Aspartate aminotransferase, cytoplasmic OS=Homo sapiens GN=GOT1 PE=1 SV=3                                    |           | 73.91   |
| P17252                 | KPCA_HUMAN Protein kinase C alpha type OS=Homo sapiens GN=PRKCA PE=1 SV=4                                               | 7.71E-16  |         |
| P17301                 | ITA2_HUMAN Integrin alpha-2 OS=Homo sapiens GN=ITGA2 PE=1 SV=1                                                          |           | 1035.99 |
| P17480                 | UBF1_HUMAN Nucleolar transcription factor 1 OS=Homo sapiens GN=UBTF PE=1 SV=1                                           |           |         |
| P17480-2               | UBF1_HUMAN Isoform UBF2 of Nucleolar transcription factor 1 OS=Homo sapiens GN=UBTF                                     |           |         |
| P17480;P17480-2        | UBF1_HUMAN Nucleolar transcription factor 1 OS=Homo sapiens GN=UBTF PE=1 SV=1;>sp P17480-2 UBF1_HUMAN Isoform UBF2 of   | 2.14E-30  |         |
| P17540                 | KCRS_HUMAN Creatine kinase S-type, mitochondrial OS=Homo sapiens GN=CKMT2 PE=1 SV=2                                     |           |         |
| P17542                 | TAL1_HUMAN T-cell acute lymphocytic leukemia protein 1 OS=Homo sapiens GN=TAL1 PE=1 SV=2                                |           |         |
| P17542-2               | TAL1_HUMAN Isoform PP39-TAL1 of T-cell acute lymphocytic leukemia protein 1 OS=Homo sapiens GN=TAL1                     |           |         |
| P17542-3               | TAL1_HUMAN Isoform PP22-TAL1 of T-cell acute lymphocytic leukemia protein 1 OS=Homo sapiens GN=TAL1                     |           |         |
| P17568                 | NDUB7_HUMAN NADH dehydrogenase [ubiquinone] 1 beta subcomplex subunit 7 OS=Homo sapiens GN=NDUFB7 PE=1 SV=4             | 6.53E-08  |         |
| P17612                 | KAPCA_HUMAN cAMP-dependent protein kinase catalytic subunit alpha OS=Homo sapiens GN=PRKACA PE=1 SV=2                   |           | 115.92  |
| P17612-2               | KAPCA_HUMAN Isoform 2 of cAMP-dependent protein kinase catalytic subunit alpha OS=Homo sapiens GN=PRKACA                |           | 115.92  |
| P17612;A8K8B9;P17612-2 | KAPCA_HUMAN cAMP-dependent protein kinase catalytic subunit alpha OS=Homo sapiens GN=PRKACA PE=1 SV=2;>tr A8K8B9 A8K8   | 9.93E-58  |         |
| P17655                 | CAN2_HUMAN Calpain-2 catalytic subunit OS=Homo sapiens GN=CAPN2 PE=1 SV=6                                               |           | 167.37  |
| P17661                 | DESM_HUMAN Desmin OS=Homo sapiens GN=DES PE=1 SV=3                                                                      |           | 336.53  |
| P17693                 | HLAG_HUMAN HLA class I histocompatibility antigen, alpha chain G OS=Homo sapiens GN=HLA-G PE=1 SV=1                     |           | 37.17   |
| P17706;Q59F91;D3DUJ3   | PTN2_HUMAN Tyrosine-protein phosphatase non-receptor type 2 OS=Homo sapiens GN=PTPN2 PE=1 SV=2;>tr Q59F91 Q59F91_HUM    | 5.37E-05  |         |
| P17812                 | PYRG1_HUMAN CTP synthase 1 OS=Homo sapiens GN=CTPS PE=1 SV=2                                                            |           | 68.25   |
| P17813;P17813-2        | EGLN_HUMAN Endoglin OS=Homo sapiens GN=ENG PE=1 SV=2;>sp P17813-2 EGLN_HUMAN Isoform Short of Endoglin OS=Homo sa       | 5.47E-14  |         |
| P17844                 | DDX5_HUMAN Probable ATP-dependent RNA helicase DDX5 OS=Homo sapiens GN=DDX5 PE=1 SV=1                                   |           | 324.56  |
| P17858                 | K6PL_HUMAN 6-phosphofructokinase, liver type OS=Homo sapiens GN=PFKL PE=1 SV=6                                          |           | 120.28  |
| P17858-2               | K6PL_HUMAN Isoform 2 of 6-phosphofructokinase, liver type OS=Homo sapiens GN=PFKL                                       |           | 55.7    |
| P17858-2;P17858        | 2 K6PL_HUMAN Isoform 2 of 6-phosphofructokinase, liver type OS=Homo sapiens GN=PFKL;>sp P17858 K6PL_HUMAN 6-phosphofruc | 0         |         |
| P17858;P17858-2        | K6PL_HUMAN 6-phosphofructokinase, liver type OS=Homo sapiens GN=PFKL PE=1 SV=6;>sp P17858-2 K6PL_HUMAN Isoform 2 of 6   | 9.35E-291 |         |
| P17900                 | SAP3_HUMAN Ganglioside GM2 activator OS=Homo sapiens GN=GM2A PE=1 SV=4                                                  |           | 158.92  |
| P17931                 | LEG3_HUMAN Galectin-3 OS=Homo sapiens GN=LGALS3 PE=1 SV=5                                                               |           | 687.47  |
| P17980                 | PRS6A_HUMAN 26S protease regulatory subunit 6A OS=Homo sapiens GN=PSMC3 PE=1 SV=3                                       |           | 527.95  |
| P17987                 | TCPA_HUMAN T-complex protein 1 subunit alpha OS=Homo sapiens GN=TCP1 PE=1 SV=1                                          |           | 485.11  |
| P18031                 | PTN1_HUMAN Tyrosine-protein phosphatase non-receptor type 1 OS=Homo sapiens GN=PTPN1 PE=1 SV=1                          |           | 427.83  |
| P18074                 | ERCC2_HUMAN TFIIH basal transcription factor complex helicase XPD subunit OS=Homo sapiens GN=ERCC2 PE=1 SV=1            |           | 119.44  |
| P18077                 | RL35A_HUMAN 60S ribosomal protein L35a OS=Homo sapiens GN=RPL35A PE=1 SV=2                                              |           | 393.9   |
| P18084                 | ITB5_HUMAN Integrin beta-5 OS=Homo sapiens GN=ITGB5 PE=1 SV=1                                                           |           | 83.05   |
| P18085                 | ARF4_HUMAN ADP-ribosylation factor 4 OS=Homo sapiens GN=ARF4 PE=1 SV=3                                                  |           | 598.8   |
| P18124                 | RL7_HUMAN 60S ribosomal protein L7 OS=Homo sapiens GN=RPL7 PE=1 SV=1                                                    |           | 1321.48 |
| P18135;P18136          | KV312_HUMAN Ig kappa chain V-III region HAH OS=Homo sapiens PE=2 SV=1;>sp P18136 KV313_HUMAN Ig kappa chain V-III regio | 4.81E-62  |         |
| P18206                 | VINC_HUMAN Vinculin OS=Homo sapiens GN=VCL PE=1 SV=4                                                                    |           | 600.82  |
| P18206-2               | VINC_HUMAN Isoform 1 of Vinculin OS=Homo sapiens GN=VCL                                                                 |           | 600.82  |
| P18206;P18206-2        | VINC_HUMAN Vinculin OS=Homo sapiens GN=VCL PE=1 SV=4;>sp P18206-2 VINC_HUMAN Isoform 1 of Vinculin OS=Homo sapiens      | 2.21E-22  |         |
| P18428                 | LBP_HUMAN Lipopolysaccharide-binding protein OS=Homo sapiens GN=LBP PE=1 SV=3                                           | 6.58E-12  |         |
| P18440                 | ARY1_HUMAN Arylamine N-acetyltransferase 1 OS=Homo sapiens GN=NAT1 PE=1 SV=2                                            | 1.84E-205 |         |
| P18462                 | 1A25_HUMAN HLA class I histocompatibility antigen, A-25 alpha chain OS=Homo sapiens GN=HLA-A PE=2 SV=1                  |           | 587.75  |
| P18463                 | 1B37_HUMAN HLA class I histocompatibility antigen, B-37 alpha chain OS=Homo sapiens GN=HLA-B PE=2 SV=1                  |           | 441.04  |
| P18464                 | 1B51_HUMAN HLA class I histocompatibility antigen, B-51 alpha chain OS=Homo sapiens GN=HLA-B PE=1 SV=1                  |           | 413.81  |
| P18465                 | 1B57_HUMAN HLA class I histocompatibility antigen, B-57 alpha chain OS=Homo sapiens GN=HLA-B PE=1 SV=1                  |           | 525.42  |
| P18564                 | ITB6_HUMAN Integrin beta-6 OS=Homo sapiens GN=ITGB6 PE=1 SV=2                                                           | 4.59E-06  |         |
| P18583                 | SON_HUMAN Protein SON OS=Homo sapiens GN=SON PE=1 SV=4                                                                  |           |         |
| P18583-10              | SON_HUMAN Isoform J of Protein SON OS=Homo sapiens GN=SON                                                               |           |         |
| P18583-2               | SON_HUMAN Isoform A of Protein SON OS=Homo sapiens GN=SON                                                               |           |         |
| P18583-3               | SON_HUMAN Isoform B of Protein SON OS=Homo sapiens GN=SON                                                               |           |         |
| P18583-4               | SON_HUMAN Isoform C of Protein SON OS=Homo sapiens GN=SON                                                               |           |         |
| P18583-5               | SON_HUMAN Isoform D of Protein SON OS=Homo sapiens GN=SON                                                               |           |         |
| P18583-6               | SON_HUMAN Isoform E of Protein SON OS=Homo sapiens GN=SON                                                               |           |         |
| P18583-7               | SON_HUMAN Isoform G of Protein SON OS=Homo sapiens GN=SON                                                               |           |         |
| P18583-8               | SON_HUMAN Isoform H of Protein SON OS=Homo sapiens GN=SON                                                               |           |         |
| P18583-9               | SON_HUMAN Isoform I of Protein SON OS=Homo sapiens GN=SON                                                               |           |         |
| P18583-9;P18583-5;P185 | 9 SON_HUMAN Isoform I of Protein SON OS=Homo sapiens GN=SON;>sp P18583-5 SON_HUMAN Isoform D of Protein SON OS=Hom      | 1.35E-08  |         |
| P18615                 | NELFE_HUMAN Negative elongation factor E OS=Homo sapiens GN=RDBP PE=1 SV=3                                              | 5.48E-63  |         |
| P18621                 | RL17_HUMAN 60S ribosomal protein L17 OS=Homo sapiens GN=RPL17 PE=1 SV=3                                                 |           | 897.6   |

|                        |                                                                                                                          |           |         |
|------------------------|--------------------------------------------------------------------------------------------------------------------------|-----------|---------|
| P18669                 | PGAM1_HUMAN Phosphoglycerate mutase 1 OS=Homo sapiens GN=PGAM1 PE=1 SV=2                                                 |           | 798.17  |
| P18754                 | RCC1_HUMAN Regulator of chromosome condensation OS=Homo sapiens GN=RCC1 PE=1 SV=1                                        |           | 299.74  |
| P18754-2               | RCC1_HUMAN Isoform 2 of Regulator of chromosome condensation OS=Homo sapiens GN=RCC1                                     |           | 299.74  |
| P18754-2;P18754        | 2 RCC1_HUMAN Isoform 2 of Regulator of chromosome condensation OS=Homo sapiens GN=RCC1;>sp P18754 RCC1_HUMAN Regula      | 4.79E-29  |         |
| P18827                 | SDC1_HUMAN Syndecan-1 OS=Homo sapiens GN=SDC1 PE=1 SV=3                                                                  |           |         |
| P18846                 | ATF1_HUMAN Cyclic AMP-dependent transcription factor ATF-1 OS=Homo sapiens GN=ATF1 PE=1 SV=2                             |           | 18.55   |
| P18858                 | DNLI1_HUMAN DNA ligase 1 OS=Homo sapiens GN=LIG1 PE=1 SV=1                                                               |           | 46.73   |
| P18859                 | ATP5J_HUMAN ATP synthase-coupling factor 6, mitochondrial OS=Homo sapiens GN=ATP5J PE=1 SV=1                             |           | 22.86   |
| P18887                 | XRCC1_HUMAN DNA repair protein XRCC1 OS=Homo sapiens GN=XRCC1 PE=1 SV=2                                                  |           |         |
| P19012                 | K1C15_HUMAN Keratin, type I cytoskeletal 15 OS=Homo sapiens GN=KRT15 PE=1 SV=3                                           |           | 502.08  |
| P19013                 | K2C4_HUMAN Keratin, type II cytoskeletal 4 OS=Homo sapiens GN=KRT4 PE=1 SV=4                                             |           | 364.8   |
| P19022                 | CADH2_HUMAN Cadherin-2 OS=Homo sapiens GN=CDH2 PE=1 SV=4                                                                 |           |         |
| P19086                 | GNAZ_HUMAN Guanine nucleotide-binding protein G(z) subunit alpha OS=Homo sapiens GN=GNAZ PE=2 SV=3                       |           | 1.77    |
| P19087                 | GNAT2_HUMAN Guanine nucleotide-binding protein G(t) subunit alpha-2 OS=Homo sapiens GN=GNAT2 PE=1 SV=4                   |           | 178.57  |
| P19099                 | C11B2_HUMAN Cytochrome P450 11B2, mitochondrial OS=Homo sapiens GN=CYP11B2 PE=1 SV=3                                     |           |         |
| P19105                 | ML12A_HUMAN Myosin regulatory light chain 12A OS=Homo sapiens GN=MYL12A PE=1 SV=2                                        |           | 1287.85 |
| P19174                 | PLCG1_HUMAN 1-phosphatidylinositol-4,5-bisphosphate phosphodiesterase gamma-1 OS=Homo sapiens GN=PLCG1 PE=1 SV=1         |           |         |
| P19174-2               | PLCG1_HUMAN Isoform 2 of 1-phosphatidylinositol-4,5-bisphosphate phosphodiesterase gamma-1 OS=Homo sapiens GN=PLCG1      |           |         |
| P19174-2;P19174        | 2 PLCG1_HUMAN Isoform 2 of 1-phosphatidylinositol-4,5-bisphosphate phosphodiesterase gamma-1 OS=Homo sapiens GN=PLCG1;>! | 2.01E-63  |         |
| P19256                 | LFA3_HUMAN Lymphocyte function-associated antigen 3 OS=Homo sapiens GN=CD58 PE=1 SV=1                                    |           |         |
| P19256-2               | LFA3_HUMAN Isoform 2 of Lymphocyte function-associated antigen 3 OS=Homo sapiens GN=CD58                                 |           |         |
| P19256-3               | LFA3_HUMAN Isoform 3 of Lymphocyte function-associated antigen 3 OS=Homo sapiens GN=CD58                                 |           |         |
| P19338                 | NUCL_HUMAN Nucleolin OS=Homo sapiens GN=NCL PE=1 SV=3                                                                    |           | 1438.17 |
| P19367                 | HXK1_HUMAN Hexokinase-1 OS=Homo sapiens GN=HK1 PE=1 SV=3                                                                 |           | 792.34  |
| P19367-2               | HXK1_HUMAN Isoform 2 of Hexokinase-1 OS=Homo sapiens GN=HK1                                                              |           | 792.34  |
| P19367-3               | HXK1_HUMAN Isoform 3 of Hexokinase-1 OS=Homo sapiens GN=HK1                                                              |           | 792.34  |
| P19367-3;P19367;P19367 | 3 HXK1_HUMAN Isoform 3 of Hexokinase-1 OS=Homo sapiens GN=HK1;>sp P19367 HXK1_HUMAN Hexokinase-1 OS=Homo sapiens         | 1.67E-115 |         |
| P19367-4               | HXK1_HUMAN Isoform 4 of Hexokinase-1 OS=Homo sapiens GN=HK1                                                              |           | 792.34  |
| P19367;P19367-3;P19367 | HXK1_HUMAN Hexokinase-1 OS=Homo sapiens GN=HK1 PE=1 SV=3;>sp P19367-3 HXK1_HUMAN Isoform 3 of Hexokinase-1 OS=Hc         | 1.03E-92  |         |
| P19387                 | RPB3_HUMAN DNA-directed RNA polymerase II subunit RPB3 OS=Homo sapiens GN=POLR2C PE=1 SV=2                               |           |         |
| P19388                 | RPAB1_HUMAN DNA-directed RNA polymerases I, II, and III subunit RPABC1 OS=Homo sapiens GN=POLR2E PE=1 SV=4               |           | 156.26  |
| P19404                 | NDUV2_HUMAN NADH dehydrogenase [ubiquinone] flavoprotein 2, mitochondrial OS=Homo sapiens GN=NDUFV2 PE=1 SV=2            |           | 191.72  |
| P19447                 | ERCC3_HUMAN TFIIH basal transcription factor complex helicase XPB subunit OS=Homo sapiens GN=ERCC3 PE=1 SV=1             |           |         |
| P19474;P19474-2        | RO52_HUMAN E3 ubiquitin-protein ligase TRIM21 OS=Homo sapiens GN=TRIM21 PE=1 SV=1;>sp P19474-2 RO52_HUMAN Isoform 2      | 1.46E-07  |         |
| P19525                 | E2AK2_HUMAN Interferon-induced, double-stranded RNA-activated protein kinase OS=Homo sapiens GN=EIF2AK2 PE=1 SV=2        |           | 75.46   |
| P19623                 | SPEE_HUMAN Spermidine synthase OS=Homo sapiens GN=SRM PE=1 SV=1                                                          |           | 76.03   |
| P19652                 | A1AG2_HUMAN Alpha-1-acid glycoprotein 2 OS=Homo sapiens GN=ORM2 PE=1 SV=2                                                |           | 79.36   |
| P19784                 | CSK22_HUMAN Casein kinase II subunit alpha' OS=Homo sapiens GN=CSNK2A2 PE=1 SV=1                                         |           |         |
| P19793                 | RXRA_HUMAN Retinoic acid receptor RXR-alpha OS=Homo sapiens GN=RXRA PE=1 SV=1                                            |           |         |
| P19823                 | ITIH2_HUMAN Inter-alpha-trypsin inhibitor heavy chain H2 OS=Homo sapiens GN=ITIH2 PE=1 SV=2                              |           | 140.64  |
| P19827                 | ITIH1_HUMAN Inter-alpha-trypsin inhibitor heavy chain H1 OS=Homo sapiens GN=ITIH1 PE=1 SV=3                              |           | 54.91   |
| P19971                 | TYPH_HUMAN Thymidine phosphorylase OS=Homo sapiens GN=TYMP PE=1 SV=2                                                     | 0         |         |
| P20020                 | AT2B1_HUMAN Plasma membrane calcium-transporting ATPase 1 OS=Homo sapiens GN=ATP2B1 PE=1 SV=3                            |           | 1172.52 |
| P20020-2               | AT2B1_HUMAN Isoform A of Plasma membrane calcium-transporting ATPase 1 OS=Homo sapiens GN=ATP2B1                         |           | 1101.42 |
| P20020-3               | AT2B1_HUMAN Isoform B of Plasma membrane calcium-transporting ATPase 1 OS=Homo sapiens GN=ATP2B1                         |           | 1177.92 |
| P20020-4               | AT2B1_HUMAN Isoform C of Plasma membrane calcium-transporting ATPase 1 OS=Homo sapiens GN=ATP2B1                         |           | 1172.52 |
| P20020-5               | AT2B1_HUMAN Isoform E of Plasma membrane calcium-transporting ATPase 1 OS=Homo sapiens GN=ATP2B1                         |           | 1101.42 |
| P20020-6               | AT2B1_HUMAN Isoform K of Plasma membrane calcium-transporting ATPase 1 OS=Homo sapiens GN=ATP2B1                         |           | 1177.92 |
| P20020;P20020-4;P20020 | AT2B1_HUMAN Plasma membrane calcium-transporting ATPase 1 OS=Homo sapiens GN=ATP2B1 PE=1 SV=3;>sp P20020-4 AT2B1_H       | 1.92E-100 |         |
| P20036                 | DPA1_HUMAN HLA class II histocompatibility antigen, DP alpha 1 chain OS=Homo sapiens GN=HLA-DPA1 PE=1 SV=1               | 3.11E-38  |         |
| P20039                 | 2B1B_HUMAN HLA class II histocompatibility antigen, DRB1-11 beta chain OS=Homo sapiens GN=HLA-DRB1 PE=1 SV=1             |           | 29.42   |
| P20042                 | IF2B_HUMAN Eukaryotic translation initiation factor 2 subunit 2 OS=Homo sapiens GN=EIF2S2 PE=1 SV=2                      |           | 689.37  |
| P20073                 | ANXA7_HUMAN Annexin A7 OS=Homo sapiens GN=ANXA7 PE=1 SV=3                                                                |           |         |
| P20073-2               | ANXA7_HUMAN Isoform 2 of Annexin A7 OS=Homo sapiens GN=ANXA7                                                             |           |         |
| P20073;P20073-2        | ANXA7_HUMAN Annexin A7 OS=Homo sapiens GN=ANXA7 PE=1 SV=3;>sp P20073-2 ANXA7_HUMAN Isoform 2 of Annexin A7 OS=H          | 5.48E-166 |         |
| P20132                 | SDHL_HUMAN L-serine dehydratase/L-threonine deaminase OS=Homo sapiens GN=SDS PE=1 SV=2                                   | 9.47E-05  |         |
| P20226                 | TBP_HUMAN TATA-box-binding protein OS=Homo sapiens GN=TBP PE=1 SV=2                                                      |           |         |
| P20231;Q15661;Q15661-  | TRYB2_HUMAN Tryptase beta-2 OS=Homo sapiens GN=TPSB2 PE=1 SV=2;>sp Q15661 TRYB1_HUMAN Tryptase alpha/beta-1 OS=Hc        | 8.16E-185 |         |
| P20290                 | BTF3_HUMAN Transcription factor BTF3 OS=Homo sapiens GN=BTF3 PE=1 SV=1                                                   |           | 406.47  |
| P20290-2               | BTF3_HUMAN Isoform 2 of Transcription factor BTF3 OS=Homo sapiens GN=BTF3                                                |           | 442.51  |
| P20290;P20290-2        | BTF3_HUMAN Transcription factor BTF3 OS=Homo sapiens GN=BTF3 PE=1 SV=1;>sp P20290-2 BTF3_HUMAN Isoform 2 of Transcripti  | 2.24E-138 |         |

|                             |                                                                                                                        |           |        |
|-----------------------------|------------------------------------------------------------------------------------------------------------------------|-----------|--------|
| P20292                      | AL5AP_HUMAN Arachidonate 5-lipoxygenase-activating protein OS=Homo sapiens GN=ALOX5AP PE=1 SV=2                        | 6.37E-10  |        |
| P20336                      | RAB3A_HUMAN Ras-related protein Rab-3A OS=Homo sapiens GN=RAB3A PE=1 SV=1                                              |           | 90.26  |
| P20337                      | RAB3B_HUMAN Ras-related protein Rab-3B OS=Homo sapiens GN=RAB3B PE=1 SV=2                                              |           | 90.26  |
| P20338                      | RAB4A_HUMAN Ras-related protein Rab-4A OS=Homo sapiens GN=RAB4A PE=1 SV=2                                              |           | 98.54  |
| P20339                      | RAB5A_HUMAN Ras-related protein Rab-5A OS=Homo sapiens GN=RAB5A PE=1 SV=2                                              |           | 712.12 |
| P20340                      | RAB6A_HUMAN Ras-related protein Rab-6A OS=Homo sapiens GN=RAB6A PE=1 SV=3                                              |           | 396.63 |
| P20340-2                    | RAB6A_HUMAN Isoform 2 of Ras-related protein Rab-6A OS=Homo sapiens GN=RAB6A                                           |           | 467.87 |
| P20340-2;Q6FGX3;P20340-2    | RAB6A_HUMAN Isoform 2 of Ras-related protein Rab-6A OS=Homo sapiens GN=RAB6A;>tr Q6FGX3 Q6FGX3_HUMAN RAB6A protei      | 7.77E-55  |        |
| P20340;P20340-2;Q9NRW       | RAB6A_HUMAN Ras-related protein Rab-6A OS=Homo sapiens GN=RAB6A PE=1 SV=3;>sp P20340-2 RAB6A_HUMAN Isoform 2 of Ra     | 4.72E-125 |        |
| P20585                      | MSH3_HUMAN DNA mismatch repair protein Msh3 OS=Homo sapiens GN=MSH3 PE=1 SV=4                                          |           | 60.9   |
| P20591                      | MX1_HUMAN Interferon-induced GTP-binding protein Mx1 OS=Homo sapiens GN=MX1 PE=1 SV=4                                  | 7.57E-284 |        |
| P20592                      | MX2_HUMAN Interferon-induced GTP-binding protein Mx2 OS=Homo sapiens GN=MX2 PE=1 SV=1                                  | 1.12E-51  |        |
| P20618                      | PSB1_HUMAN Proteasome subunit beta type-1 OS=Homo sapiens GN=PSMB1 PE=1 SV=2                                           |           | 861.88 |
| P20645                      | MPRD_HUMAN Cation-dependent mannose-6-phosphate receptor OS=Homo sapiens GN=M6PR PE=1 SV=1                             | 1.07E-91  |        |
| P20648                      | ATP4A_HUMAN Potassium-transporting ATPase alpha chain 1 OS=Homo sapiens GN=ATP4A PE=2 SV=5                             |           | 333.64 |
| P20671                      | H2A1D_HUMAN Histone H2A type 1-D OS=Homo sapiens GN=HIST1H2AD PE=1 SV=2                                                |           | 288.83 |
| P20674                      | COX5A_HUMAN Cytochrome c oxidase subunit 5A, mitochondrial OS=Homo sapiens GN=COX5A PE=1 SV=2                          |           | 254.5  |
| P20700                      | LMNB1_HUMAN Lamin-B1 OS=Homo sapiens GN=LMNB1 PE=1 SV=2                                                                |           | 270.35 |
| P20701-2;P20701             | 2 ITAL_HUMAN Isoform 2 of Integrin alpha-L OS=Homo sapiens GN=ITGAL;>sp P20701 ITAL_HUMAN Integrin alpha-L OS=Homo sap | 1.49E-06  |        |
| P20742                      | PZP_HUMAN Pregnancy zone protein OS=Homo sapiens GN=PZP PE=1 SV=4                                                      |           | 296.87 |
| P20742-2                    | PZP_HUMAN Isoform 2 of Pregnancy zone protein OS=Homo sapiens GN=PZP                                                   |           | 296.08 |
| P20742;P20742-2             | PZP_HUMAN Pregnancy zone protein OS=Homo sapiens GN=PZP PE=1 SV=4;>sp P20742-2 PZP_HUMAN Isoform 2 of Pregnancy zone   | 2.97E-218 |        |
| P20774                      | MIME_HUMAN Mimecan OS=Homo sapiens GN=OGN PE=1 SV=1                                                                    | 2.84E-294 |        |
| P20794                      | MAK_HUMAN Serine/threonine-protein kinase MAK OS=Homo sapiens GN=MAK PE=2 SV=2                                         |           | 60.33  |
| P20810                      | ICAL_HUMAN Calpastatin OS=Homo sapiens GN=CAST PE=1 SV=4                                                               |           | 861.31 |
| P20810-2                    | ICAL_HUMAN Isoform 2 of Calpastatin OS=Homo sapiens GN=CAST                                                            |           | 813.8  |
| P20810-3                    | ICAL_HUMAN Isoform 3 of Calpastatin OS=Homo sapiens GN=CAST                                                            |           | 721.08 |
| P20810-4                    | ICAL_HUMAN Isoform 4 of Calpastatin OS=Homo sapiens GN=CAST                                                            |           | 849.77 |
| P20810-5                    | ICAL_HUMAN Isoform 5 of Calpastatin OS=Homo sapiens GN=CAST                                                            |           | 813.8  |
| P20810-6                    | ICAL_HUMAN Isoform 6 of Calpastatin OS=Homo sapiens GN=CAST                                                            |           | 861.31 |
| P20810-6;P20810-5;P20810-7  | 6 ICAL_HUMAN Isoform 6 of Calpastatin OS=Homo sapiens GN=CAST;>sp P20810-5 ICAL_HUMAN Isoform 5 of Calpastatin OS=Homo | 5.29E-186 |        |
| P20810-7                    | ICAL_HUMAN Isoform 7 of Calpastatin OS=Homo sapiens GN=CAST                                                            |           | 845.78 |
| P20839-3;P20839;P20839      | 3 IMDH1_HUMAN Isoform 3 of Inosine-5-monophosphate dehydrogenase 1 OS=Homo sapiens GN=IMPDH1;>sp P20839 IMDH1_HUM      | 4.71E-10  |        |
| P20853                      | CP2A7_HUMAN Cytochrome P450 2A7 OS=Homo sapiens GN=CYP2A7 PE=1 SV=2                                                    |           |        |
| P20908                      | CO5A1_HUMAN Collagen alpha-1(V) chain OS=Homo sapiens GN=COL5A1 PE=1 SV=3                                              |           |        |
| P20929                      | NEBU_HUMAN Nebulin OS=Homo sapiens GN=NEB PE=1 SV=4                                                                    |           | 72.57  |
| P20930                      | FILA_HUMAN Filaggrin OS=Homo sapiens GN=FLG PE=1 SV=3                                                                  |           | 42.21  |
| P20933                      | ASPG_HUMAN N(4)-(beta-N-acetylglucosaminyl)-L-asparaginase OS=Homo sapiens GN=AGA PE=1 SV=2                            |           | 48.85  |
| P20936;B4DTX4;B4DTL2;P20936 | RASA1_HUMAN Ras GTPase-activating protein 1 OS=Homo sapiens GN=RASA1 PE=1 SV=1;>tr B4DTX4 B4DTX4_HUMAN cDNA FLJ59      | 6.77E-47  |        |
| P20962                      | PTMS_HUMAN Parathyrosin OS=Homo sapiens GN=PTMS PE=1 SV=2                                                              |           |        |
| P21108                      | PRPS3_HUMAN Ribose-phosphate pyrophosphokinase 3 OS=Homo sapiens GN=PRPS1L1 PE=1 SV=2                                  |           | 39.14  |
| P21127                      | CD11B_HUMAN Cyclin-dependent kinase 11B OS=Homo sapiens GN=CDK11B PE=1 SV=3                                            |           | 85.59  |
| P21127-10                   | CD11B_HUMAN Isoform SV11 of Cyclin-dependent kinase 11B OS=Homo sapiens GN=CDK11B                                      |           | 68.47  |
| P21127-12                   | CD11B_HUMAN Isoform 7 of Cyclin-dependent kinase 11B OS=Homo sapiens GN=CDK11B                                         |           | 68.47  |
| P21127-2                    | CD11B_HUMAN Isoform SV1 of Cyclin-dependent kinase 11B OS=Homo sapiens GN=CDK11B                                       |           | 85.59  |
| P21127-3                    | CD11B_HUMAN Isoform 2 of Cyclin-dependent kinase 11B OS=Homo sapiens GN=CDK11B                                         |           | 74.27  |
| P21127-4                    | CD11B_HUMAN Isoform 3 of Cyclin-dependent kinase 11B OS=Homo sapiens GN=CDK11B                                         |           | 68.47  |
| P21127-5                    | CD11B_HUMAN Isoform SV4 of Cyclin-dependent kinase 11B OS=Homo sapiens GN=CDK11B                                       |           | 68.47  |
| P21127-6                    | CD11B_HUMAN Isoform SV5 of Cyclin-dependent kinase 11B OS=Homo sapiens GN=CDK11B                                       |           | 74.27  |
| P21127-8                    | CD11B_HUMAN Isoform 8 of Cyclin-dependent kinase 11B OS=Homo sapiens GN=CDK11B                                         |           | 74.27  |
| P21127-9                    | CD11B_HUMAN Isoform SV10 of Cyclin-dependent kinase 11B OS=Homo sapiens GN=CDK11B                                      |           | 85.59  |
| P21127;Q9UQ88;P21127-9      | CD11B_HUMAN Cyclin-dependent kinase 11B OS=Homo sapiens GN=CDK11B PE=1 SV=3;>sp Q9UQ88 CD11A_HUMAN Cyclin-depende      | 1.86E-37  |        |
| P21266                      | GSTM3_HUMAN Glutathione S-transferase Mu 3 OS=Homo sapiens GN=GSTM3 PE=1 SV=3                                          |           | 139.86 |
| P21281                      | VATB2_HUMAN V-type proton ATPase subunit B, brain isoform OS=Homo sapiens GN=ATP6V1B2 PE=1 SV=3                        | 1.55E-97  |        |
| P21283                      | VATC1_HUMAN V-type proton ATPase subunit C 1 OS=Homo sapiens GN=ATP6V1C1 PE=1 SV=4                                     |           |        |
| P21291                      | CSRP1_HUMAN Cysteine and glycine-rich protein 1 OS=Homo sapiens GN=CSRP1 PE=1 SV=3                                     |           | 401.5  |
| P21333                      | FLNA_HUMAN Filamin-A OS=Homo sapiens GN=FLNA PE=1 SV=4                                                                 |           | 5069.2 |
| P21333-2                    | FLNA_HUMAN Isoform 2 of Filamin-A OS=Homo sapiens GN=FLNA                                                              |           | 5069.2 |
| P21333;P21333-2             | FLNA_HUMAN Filamin-A OS=Homo sapiens GN=FLNA PE=1 SV=4;>sp P21333-2 FLNA_HUMAN Isoform 2 of Filamin-A OS=Homo sapi     | 0         |        |
| P21397                      | AOFA_HUMAN Amine oxidase [flavin-containing] A OS=Homo sapiens GN=MAOA PE=1 SV=1                                       |           |        |
| P21399                      | ACOC_HUMAN Cytoplasmic aconitate hydratase OS=Homo sapiens GN=ACO1 PE=1 SV=3                                           | 1.35E-47  |        |

|                            |                                                                                                                             |           |         |
|----------------------------|-----------------------------------------------------------------------------------------------------------------------------|-----------|---------|
| P21579                     | SYT1_HUMAN Synaptotagmin-1 OS=Homo sapiens GN=SYT1 PE=1 SV=1                                                                |           | 20.43   |
| P21580                     | TNAP3_HUMAN Tumor necrosis factor alpha-induced protein 3 OS=Homo sapiens GN=TNFAIP3 PE=1 SV=1                              |           |         |
| P21589                     | 5NTD_HUMAN 5'-nucleotidase OS=Homo sapiens GN=NT5E PE=1 SV=1                                                                |           | 1228.05 |
| P21675                     | TAF1_HUMAN Transcription initiation factor TFIID subunit 1 OS=Homo sapiens GN=TAF1 PE=1 SV=2                                |           |         |
| P21675-2                   | TAF1_HUMAN Isoform 2 of Transcription initiation factor TFIID subunit 1 OS=Homo sapiens GN=TAF1                             |           |         |
| P21675-3                   | TAF1_HUMAN Isoform 3 of Transcription initiation factor TFIID subunit 1 OS=Homo sapiens GN=TAF1                             |           |         |
| P21675-4                   | TAF1_HUMAN Isoform 4 of Transcription initiation factor TFIID subunit 1 OS=Homo sapiens GN=TAF1                             |           |         |
| P21675-4;P21675-3;P21675-2 | 4 TAF1_HUMAN Isoform 4 of Transcription initiation factor TFIID subunit 1 OS=Homo sapiens GN=TAF1;>sp P21675-3 TAF1_HUMAN I | 7.93E-08  |         |
| P21695                     | GPDA_HUMAN Glycerol-3-phosphate dehydrogenase [NAD+], cytoplasmic OS=Homo sapiens GN=GPD1 PE=1 SV=4                         | 7.21E-274 |         |
| P21741                     | MK_HUMAN Midkine OS=Homo sapiens GN=MDK PE=1 SV=1                                                                           | 3.48E-08  |         |
| P21796                     | VDAC1_HUMAN Voltage-dependent anion-selective channel protein 1 OS=Homo sapiens GN=VDAC1 PE=1 SV=2                          |           | 986.53  |
| P21802                     | FGFR2_HUMAN Fibroblast growth factor receptor 2 OS=Homo sapiens GN=FGFR2 PE=1 SV=1                                          |           | 65.01   |
| P21802-10                  | FGFR2_HUMAN Isoform 10 of Fibroblast growth factor receptor 2 OS=Homo sapiens GN=FGFR2                                      |           | 65.01   |
| P21802-11                  | FGFR2_HUMAN Isoform 11 of Fibroblast growth factor receptor 2 OS=Homo sapiens GN=FGFR2                                      |           | 65.01   |
| P21802-12                  | FGFR2_HUMAN Isoform 12 of Fibroblast growth factor receptor 2 OS=Homo sapiens GN=FGFR2                                      |           | 65.01   |
| P21802-13                  | FGFR2_HUMAN Isoform 13 of Fibroblast growth factor receptor 2 OS=Homo sapiens GN=FGFR2                                      |           | 65.72   |
| P21802-14                  | FGFR2_HUMAN Isoform 14 of Fibroblast growth factor receptor 2 OS=Homo sapiens GN=FGFR2                                      |           | 8.08    |
| P21802-15                  | FGFR2_HUMAN Isoform 15 of Fibroblast growth factor receptor 2 OS=Homo sapiens GN=FGFR2                                      |           | 64.91   |
| P21802-16                  | FGFR2_HUMAN Isoform 16 of Fibroblast growth factor receptor 2 OS=Homo sapiens GN=FGFR2                                      |           | 65.01   |
| P21802-17                  | FGFR2_HUMAN Isoform 17 of Fibroblast growth factor receptor 2 OS=Homo sapiens GN=FGFR2                                      |           | 65.01   |
| P21802-18                  | FGFR2_HUMAN Isoform 18 of Fibroblast growth factor receptor 2 OS=Homo sapiens GN=FGFR2                                      |           | 65.01   |
| P21802-19                  | FGFR2_HUMAN Isoform 19 of Fibroblast growth factor receptor 2 OS=Homo sapiens GN=FGFR2                                      |           | 8.08    |
| P21802-2                   | FGFR2_HUMAN Isoform 2 of Fibroblast growth factor receptor 2 OS=Homo sapiens GN=FGFR2                                       |           | 65.01   |
| P21802-20                  | FGFR2_HUMAN Isoform 20 of Fibroblast growth factor receptor 2 OS=Homo sapiens GN=FGFR2                                      |           | 56.93   |
| P21802-3                   | FGFR2_HUMAN Isoform 3 of Fibroblast growth factor receptor 2 OS=Homo sapiens GN=FGFR2                                       |           | 65.01   |
| P21802-4                   | FGFR2_HUMAN Isoform 4 of Fibroblast growth factor receptor 2 OS=Homo sapiens GN=FGFR2                                       |           | 56.93   |
| P21802-5                   | FGFR2_HUMAN Isoform 5 of Fibroblast growth factor receptor 2 OS=Homo sapiens GN=FGFR2                                       |           | 65.01   |
| P21802-6                   | FGFR2_HUMAN Isoform 6 of Fibroblast growth factor receptor 2 OS=Homo sapiens GN=FGFR2                                       |           | 65.01   |
| P21802-7                   | FGFR2_HUMAN Isoform 7 of Fibroblast growth factor receptor 2 OS=Homo sapiens GN=FGFR2                                       |           | 73.08   |
| P21802-8                   | FGFR2_HUMAN Isoform 8 of Fibroblast growth factor receptor 2 OS=Homo sapiens GN=FGFR2                                       |           | 65.01   |
| P21802-9                   | FGFR2_HUMAN Isoform 9 of Fibroblast growth factor receptor 2 OS=Homo sapiens GN=FGFR2                                       |           | 65.01   |
| P21810                     | PGS1_HUMAN Biglycan OS=Homo sapiens GN=BGN PE=1 SV=2                                                                        |           | 17.73   |
| P21817                     | RYR1_HUMAN Ryanodine receptor 1 OS=Homo sapiens GN=RYR1 PE=1 SV=3                                                           |           |         |
| P21817-2                   | RYR1_HUMAN Isoform 2 of Ryanodine receptor 1 OS=Homo sapiens GN=RYR1                                                        |           |         |
| P21817-3                   | RYR1_HUMAN Isoform 3 of Ryanodine receptor 1 OS=Homo sapiens GN=RYR1                                                        |           |         |
| P21912                     | DHSB_HUMAN Succinate dehydrogenase [ubiquinone] iron-sulfur subunit, mitochondrial OS=Homo sapiens GN=SDHB PE=1 SV=3        |           | 413.68  |
| P21926                     | CD9_HUMAN CD9 antigen OS=Homo sapiens GN=CD9 PE=1 SV=4                                                                      |           | 122.15  |
| P21953                     | ODDB_HUMAN 2-oxoisovalerate dehydrogenase subunit beta, mitochondrial OS=Homo sapiens GN=BCKDHB PE=1 SV=2                   | 7.70E-10  |         |
| P21964                     | COMT_HUMAN Catechol O-methyltransferase OS=Homo sapiens GN=COMT PE=1 SV=2                                                   |           | 214.95  |
| P21964-2                   | COMT_HUMAN Isoform Soluble of Catechol O-methyltransferase OS=Homo sapiens GN=COMT                                          |           | 214.95  |
| P21964;P21964-2            | COMT_HUMAN Catechol O-methyltransferase OS=Homo sapiens GN=COMT PE=1 SV=2;>sp P21964-2 COMT_HUMAN Isoform Soluble           | 2.41E-60  |         |
| P21980                     | TGM2_HUMAN Protein-glutamine gamma-glutamyltransferase 2 OS=Homo sapiens GN=TGM2 PE=1 SV=2                                  |           | 397.27  |
| P21980-2                   | TGM2_HUMAN Isoform 2 of Protein-glutamine gamma-glutamyltransferase 2 OS=Homo sapiens GN=TGM2                               |           | 196.44  |
| P21980-3                   | TGM2_HUMAN Isoform 3 of Protein-glutamine gamma-glutamyltransferase 2 OS=Homo sapiens GN=TGM2                               |           | 111.89  |
| P21980;P21980-2            | TGM2_HUMAN Protein-glutamine gamma-glutamyltransferase 2 OS=Homo sapiens GN=TGM2 PE=1 SV=2;>sp P21980-2 TGM2_HUM/           | 3.58E-292 |         |
| P22033                     | MUTA_HUMAN Methylmalonyl-CoA mutase, mitochondrial OS=Homo sapiens GN=MUT PE=1 SV=4                                         | 2.33E-09  |         |
| P22059                     | OSBP1_HUMAN Oxysterol-binding protein 1 OS=Homo sapiens GN=OSBP PE=1 SV=1                                                   | 3.43E-17  |         |
| P22061                     | PIMT_HUMAN Protein-L-isoaspartate(D-aspartate) O-methyltransferase OS=Homo sapiens GN=PCMT1 PE=1 SV=4                       |           | 122.42  |
| P22061-2                   | PIMT_HUMAN Isoform 2 of Protein-L-isoaspartate(D-aspartate) O-methyltransferase OS=Homo sapiens GN=PCMT1                    |           | 122.42  |
| P22061-2;P22061            | 2 PIMT_HUMAN Isoform 2 of Protein-L-isoaspartate(D-aspartate) O-methyltransferase OS=Homo sapiens GN=PCMT1;>sp P22061 PIM   | 9.25E-43  |         |
| P22087                     | FBRL_HUMAN rRNA 2'-O-methyltransferase fibrillar OS=Homo sapiens GN=FBL PE=1 SV=2                                           |           | 177.42  |
| P22087;Q96BS4;B4DLD4       | FBRL_HUMAN rRNA 2'-O-methyltransferase fibrillar OS=Homo sapiens GN=FBL PE=1 SV=2;>tr Q96BS4 Q96BS4_HUMAN FBL protei        | 4.93E-46  |         |
| P22090                     | RS4Y1_HUMAN 40S ribosomal protein S4, Y isoform 1 OS=Homo sapiens GN=RPS4Y1 PE=2 SV=2                                       |           | 309.47  |
| P22102                     | PUR2_HUMAN Trifunctional purine biosynthetic protein adenosine-3 OS=Homo sapiens GN=GART PE=1 SV=1                          |           | 63.36   |
| P22105;P22105-3            | TENX_HUMAN Tenascin-X OS=Homo sapiens GN=TNXB PE=1 SV=3;>sp P22105-3 TENX_HUMAN Isoform 3 of Tenascin-X OS=Homo s           | 3.18E-88  |         |
| P22223                     | CADH3_HUMAN Cadherin-3 OS=Homo sapiens GN=CDH3 PE=1 SV=2                                                                    | 2.06E-35  |         |
| P22234                     | PUR6_HUMAN Multifunctional protein ADE2 OS=Homo sapiens GN=PAICS PE=1 SV=3                                                  |           | 157.64  |
| P22234-2                   | PUR6_HUMAN Isoform 2 of Multifunctional protein ADE2 OS=Homo sapiens GN=PAICS                                               |           | 104.43  |
| P22234;P22234-2            | PUR6_HUMAN Multifunctional protein ADE2 OS=Homo sapiens GN=PAICS PE=1 SV=3;>sp P22234-2 PUR6_HUMAN Isoform 2 of Multi       | 0         |         |
| P22307                     | NLTP_HUMAN Non-specific lipid-transfer protein OS=Homo sapiens GN=SCP2 PE=1 SV=2                                            |           | 450.56  |
| P22307-2                   | NLTP_HUMAN Isoform SCP2 of Non-specific lipid-transfer protein OS=Homo sapiens GN=SCP2                                      |           | 400.31  |

|                        |                                                                                                                          |           |         |
|------------------------|--------------------------------------------------------------------------------------------------------------------------|-----------|---------|
| P22307;P22307-2        | NLTP_HUMAN Non-specific lipid-transfer protein OS=Homo sapiens GN=SCP2 PE=1 SV=2;>sp P22307-2 NLTP_HUMAN Isoform SCP2    | 9.21E-126 |         |
| P22314                 | UBA1_HUMAN Ubiquitin-like modifier-activating enzyme 1 OS=Homo sapiens GN=UBA1 PE=1 SV=3                                 |           | 1136.12 |
| P22352                 | GPX3_HUMAN Glutathione peroxidase 3 OS=Homo sapiens GN=GPX3 PE=1 SV=2                                                    | 4.03E-20  |         |
| P22392                 | NDKB_HUMAN Nucleoside diphosphate kinase B OS=Homo sapiens GN=NME2 PE=1 SV=1                                             |           | 813.02  |
| P22392-2               | NDKB_HUMAN Isoform 3 of Nucleoside diphosphate kinase B OS=Homo sapiens GN=NME2                                          |           | 996.81  |
| P22392-2;P22392        | 2 NDKB_HUMAN Isoform 3 of Nucleoside diphosphate kinase B OS=Homo sapiens GN=NME2;>sp P22392 NDKB_HUMAN Nucleoside c     | 1.62E-275 |         |
| P22413                 | ENPP1_HUMAN Ectonucleotide pyrophosphatase/phosphodiesterase family member 1 OS=Homo sapiens GN=ENPP1 PE=1 SV=2          |           | 692.53  |
| P22455                 | FGFR4_HUMAN Fibroblast growth factor receptor 4 OS=Homo sapiens GN=FGFR4 PE=1 SV=2                                       |           | 84.48   |
| P22455-2               | FGFR4_HUMAN Isoform 2 of Fibroblast growth factor receptor 4 OS=Homo sapiens GN=FGFR4                                    |           | 84.48   |
| P22492                 | H1T_HUMAN Histone H1t OS=Homo sapiens GN=HIST1H1T PE=1 SV=4                                                              |           | 160.05  |
| P22528                 | SPR1B_HUMAN Cornifin-B OS=Homo sapiens GN=SPRR1B PE=1 SV=2                                                               |           |         |
| P22531                 | SPR2E_HUMAN Small proline-rich protein 2E OS=Homo sapiens GN=SPRR2E PE=2 SV=2                                            |           | 23.4    |
| P22532                 | SPR2D_HUMAN Small proline-rich protein 2D OS=Homo sapiens GN=SPRR2D PE=2 SV=2                                            |           | 23.4    |
| P22570                 | ADRO_HUMAN NADPH:adrenodoxin oxidoreductase, mitochondrial OS=Homo sapiens GN=FDXR PE=1 SV=3                             |           |         |
| P22570-2               | ADRO_HUMAN Isoform Long of NADPH:adrenodoxin oxidoreductase, mitochondrial OS=Homo sapiens GN=FDXR                       |           |         |
| P22570-2;P22570        | 2 ADRO_HUMAN Isoform Long of NADPH:adrenodoxin oxidoreductase, mitochondrial OS=Homo sapiens GN=FDXR;>sp P22570 ADRO     | 3.09E-16  |         |
| P22570;P22570-2        | ADRO_HUMAN NADPH:adrenodoxin oxidoreductase, mitochondrial OS=Homo sapiens GN=FDXR PE=1 SV=3;>sp P22570-2 ADRO_HU        | 4.43E-107 |         |
| P22607                 | FGFR3_HUMAN Fibroblast growth factor receptor 3 OS=Homo sapiens GN=FGFR3 PE=1 SV=1                                       |           | 49.3    |
| P22607-2               | FGFR3_HUMAN Isoform 2 of Fibroblast growth factor receptor 3 OS=Homo sapiens GN=FGFR3                                    |           | 49.3    |
| P22607-3               | FGFR3_HUMAN Isoform 3 of Fibroblast growth factor receptor 3 OS=Homo sapiens GN=FGFR3                                    |           | 49.3    |
| P22607-4               | FGFR3_HUMAN Isoform 4 of Fibroblast growth factor receptor 3 OS=Homo sapiens GN=FGFR3                                    |           | 49.3    |
| P22612                 | KAPCG_HUMAN cAMP-dependent protein kinase catalytic subunit gamma OS=Homo sapiens GN=PRKACG PE=1 SV=3                    |           | 19.63   |
| P22626                 | ROA2_HUMAN Heterogeneous nuclear ribonucleoproteins A2/B1 OS=Homo sapiens GN=HNRNPA2B1 PE=1 SV=2                         |           | 1151.26 |
| P22626-2               | ROA2_HUMAN Isoform A2 of Heterogeneous nuclear ribonucleoproteins A2/B1 OS=Homo sapiens GN=HNRNPA2B1                     |           | 1146.02 |
| P22626;P22626-2        | ROA2_HUMAN Heterogeneous nuclear ribonucleoproteins A2/B1 OS=Homo sapiens GN=HNRNPA2B1 PE=1 SV=2;>sp P22626-2 ROA2       | 0         |         |
| P22670                 | RFX1_HUMAN MHC class II regulatory factor RFX1 OS=Homo sapiens GN=RFX1 PE=1 SV=2                                         |           |         |
| P22676                 | CALB2_HUMAN Calretinin OS=Homo sapiens GN=CALB2 PE=1 SV=2                                                                |           | 32.25   |
| P22681                 | CBL_HUMAN E3 ubiquitin-protein ligase CBL OS=Homo sapiens GN=CBL PE=1 SV=2                                               | 2.98E-09  |         |
| P22692                 | IBP4_HUMAN Insulin-like growth factor-binding protein 4 OS=Homo sapiens GN=IGFBP4 PE=1 SV=2                              |           | 159.78  |
| P22694                 | KAPCB_HUMAN cAMP-dependent protein kinase catalytic subunit beta OS=Homo sapiens GN=PRKACB PE=1 SV=2                     |           | 73.46   |
| P22694-2               | KAPCB_HUMAN Isoform 2 of cAMP-dependent protein kinase catalytic subunit beta OS=Homo sapiens GN=PRKACB                  |           | 73.46   |
| P22694-2;P22694-6;P226 | 2 KAPCB_HUMAN Isoform 2 of cAMP-dependent protein kinase catalytic subunit beta OS=Homo sapiens GN=PRKACB;>sp P22694-6 k | 1.90E-32  |         |
| P22694-3               | KAPCB_HUMAN Isoform 3 of cAMP-dependent protein kinase catalytic subunit beta OS=Homo sapiens GN=PRKACB                  |           | 73.46   |
| P22694-4               | KAPCB_HUMAN Isoform 4 of cAMP-dependent protein kinase catalytic subunit beta OS=Homo sapiens GN=PRKACB                  |           | 73.46   |
| P22694-5               | KAPCB_HUMAN Isoform 5 of cAMP-dependent protein kinase catalytic subunit beta OS=Homo sapiens GN=PRKACB                  |           | 73.46   |
| P22694-6               | KAPCB_HUMAN Isoform 6 of cAMP-dependent protein kinase catalytic subunit beta OS=Homo sapiens GN=PRKACB                  |           | 73.46   |
| P22694-7               | KAPCB_HUMAN Isoform 7 of cAMP-dependent protein kinase catalytic subunit beta OS=Homo sapiens GN=PRKACB                  |           | 73.46   |
| P22694-8               | KAPCB_HUMAN Isoform 8 of cAMP-dependent protein kinase catalytic subunit beta OS=Homo sapiens GN=PRKACB                  |           | 18.41   |
| P22695                 | QCR2_HUMAN Cytochrome b-c1 complex subunit 2, mitochondrial OS=Homo sapiens GN=UQCRC2 PE=1 SV=3                          |           | 446.83  |
| P22792                 | CPN2_HUMAN Carboxypeptidase N subunit 2 OS=Homo sapiens GN=CPN2 PE=1 SV=3                                                | 1.02E-05  |         |
| P22830-2;P22830        | 2 HEMH_HUMAN Isoform 2 of Ferrochelatase, mitochondrial OS=Homo sapiens GN=FECH;>sp P22830 HEMH_HUMAN Ferrochelatase,    | 3.37E-05  |         |
| P22897                 | MRC1_HUMAN Macrophage mannose receptor 1 OS=Homo sapiens GN=MRC1 PE=1 SV=1                                               | 2.89E-09  |         |
| P23141                 | EST1_HUMAN Liver carboxylesterase 1 OS=Homo sapiens GN=CES1 PE=1 SV=2                                                    |           |         |
| P23141-2               | EST1_HUMAN Isoform 2 of Liver carboxylesterase 1 OS=Homo sapiens GN=CES1                                                 |           |         |
| P23141-2;P23141        | 2 EST1_HUMAN Isoform 2 of Liver carboxylesterase 1 OS=Homo sapiens GN=CES1;>sp P23141 EST1_HUMAN Liver carboxylesterase  | 5.79E-99  |         |
| P23142-4               | 4 FBLN1_HUMAN Isoform C of Fibulin-1 OS=Homo sapiens GN=FBLN1                                                            | 0         |         |
| P23142;P23142-3;P23142 | FBLN1_HUMAN Fibulin-1 OS=Homo sapiens GN=FBLN1 PE=1 SV=4;>sp P23142-3 FBLN1_HUMAN Isoform B of Fibulin-1 OS=Homo s       | 0         |         |
| P23193                 | TCEA1_HUMAN Transcription elongation factor A protein 1 OS=Homo sapiens GN=TCEA1 PE=1 SV=2                               |           | 61.58   |
| P23193-2               | TCEA1_HUMAN Isoform 2 of Transcription elongation factor A protein 1 OS=Homo sapiens GN=TCEA1                            |           | 78.33   |
| P23193;B7Z4W0;P23193-  | TCEA1_HUMAN Transcription elongation factor A protein 1 OS=Homo sapiens GN=TCEA1 PE=1 SV=2;>tr B7Z4W0 B7Z4W0_HUMAN c     | 3.40E-76  |         |
| P23229                 | ITA6_HUMAN Integrin alpha-6 OS=Homo sapiens GN=ITGA6 PE=1 SV=4                                                           |           | 799.77  |
| P23229-2               | ITA6_HUMAN Isoform Alpha-6X1A of Integrin alpha-6 OS=Homo sapiens GN=ITGA6                                               |           | 812.95  |
| P23229-3               | ITA6_HUMAN Isoform Alpha-6X1B of Integrin alpha-6 OS=Homo sapiens GN=ITGA6                                               |           | 799.77  |
| P23229-4               | ITA6_HUMAN Isoform Alpha-6X2A of Integrin alpha-6 OS=Homo sapiens GN=ITGA6                                               |           | 812.95  |
| P23229-5               | ITA6_HUMAN Isoform Alpha-6X2B of Integrin alpha-6 OS=Homo sapiens GN=ITGA6                                               |           | 799.77  |
| P23229-6               | ITA6_HUMAN Isoform Alpha-6X1X2A of Integrin alpha-6 OS=Homo sapiens GN=ITGA6                                             |           | 812.95  |
| P23229-6;P23229-9;P232 | 6 ITA6_HUMAN Isoform Alpha-6X1X2A of Integrin alpha-6 OS=Homo sapiens GN=ITGA6;>sp P23229-9 ITA6_HUMAN Isoform 9 of Ini  | 0         |         |
| P23229-7               | ITA6_HUMAN Isoform 7 of Integrin alpha-6 OS=Homo sapiens GN=ITGA6                                                        |           | 707.09  |
| P23229-9               | ITA6_HUMAN Isoform 9 of Integrin alpha-6 OS=Homo sapiens GN=ITGA6                                                        |           | 812.95  |
| P23229;P23229-3;P23229 | ITA6_HUMAN Integrin alpha-6 OS=Homo sapiens GN=ITGA6 PE=1 SV=4;>sp P23229-3 ITA6_HUMAN Isoform Alpha-6X1B of Integrin    | 0         |         |
| P23246                 | SFPQ_HUMAN Splicing factor, proline- and glutamine-rich OS=Homo sapiens GN=SFPQ PE=1 SV=2                                |           | 1126.52 |



|                        |                                                                                                                              |           |         |
|------------------------|------------------------------------------------------------------------------------------------------------------------------|-----------|---------|
| P23246-2               | SFPQ_HUMAN Isoform Short of Splicing factor, proline- and glutamine-rich OS=Homo sapiens GN=SFPQ                             |           | 1012.19 |
| P23246;P23246-2        | SFPQ_HUMAN Splicing factor, proline- and glutamine-rich OS=Homo sapiens GN=SFPQ PE=1 SV=2;>sp P23246-2 SFPQ_HUMAN Isof       | 0         |         |
| P23258                 | TBG1_HUMAN Tubulin gamma-1 chain OS=Homo sapiens GN=TUBG1 PE=1 SV=2                                                          |           | 30.66   |
| P23284                 | PPIB_HUMAN Peptidyl-prolyl cis-trans isomerase B OS=Homo sapiens GN=PPIB PE=1 SV=2                                           |           | 1137.2  |
| P23297                 | S10A1_HUMAN Protein S100-A1 OS=Homo sapiens GN=S100A1 PE=1 SV=2                                                              | 2.79E-64  |         |
| P23368                 | MAOM_HUMAN NAD-dependent malic enzyme, mitochondrial OS=Homo sapiens GN=ME2 PE=1 SV=1                                        |           | 104.88  |
| P23378                 | GCSP_HUMAN Glycine dehydrogenase [decarboxylating], mitochondrial OS=Homo sapiens GN=GLDC PE=1 SV=2                          | 2.16E-14  |         |
| P23381                 | SYWC_HUMAN Tryptophanyl-tRNA synthetase, cytoplasmic OS=Homo sapiens GN=WARS PE=1 SV=2                                       |           | 73.99   |
| P23381-2               | SYWC_HUMAN Isoform 2 of Tryptophanyl-tRNA synthetase, cytoplasmic OS=Homo sapiens GN=WARS                                    |           | 73.99   |
| P23381;P23381-2        | SYWC_HUMAN Tryptophanyl-tRNA synthetase, cytoplasmic OS=Homo sapiens GN=WARS PE=1 SV=2;>sp P23381-2 SYWC_HUMAN Is            | 0         |         |
| P23396                 | RS3_HUMAN 40S ribosomal protein S3 OS=Homo sapiens GN=RPS3 PE=1 SV=2                                                         |           | 1481.05 |
| P23434                 | GCSH_HUMAN Glycine cleavage system H protein, mitochondrial OS=Homo sapiens GN=GCSH PE=1 SV=2                                |           |         |
| P23443;P23443-2        | KS6B1_HUMAN Ribosomal protein S6 kinase beta-1 OS=Homo sapiens GN=RPS6KB1 PE=1 SV=2;>sp P23443-2 KS6B1_HUMAN Isofc           | 2.88E-31  |         |
| P23458                 | JAK1_HUMAN Tyrosine-protein kinase JAK1 OS=Homo sapiens GN=JAK1 PE=1 SV=2                                                    |           | 71.51   |
| P23468;P23468-2        | PTPRD_HUMAN Receptor-type tyrosine-protein phosphatase delta OS=Homo sapiens GN=PTPRD PE=1 SV=2;>sp P23468-2 PTPRD_H         | 4.02E-11  |         |
| P23470;P23470-2        | PTPRG_HUMAN Receptor-type tyrosine-protein phosphatase gamma OS=Homo sapiens GN=PTPRG PE=1 SV=4;>sp P23470-2 PTPRG_          | 3.85E-06  |         |
| P23497                 | SP100_HUMAN Nuclear autoantigen Sp-100 OS=Homo sapiens GN=SP100 PE=1 SV=3                                                    |           | 75.36   |
| P23497-2               | SP100_HUMAN Isoform Sp100-A of Nuclear autoantigen Sp-100 OS=Homo sapiens GN=SP100                                           |           | 53.24   |
| P23497-3               | SP100_HUMAN Isoform Sp100-B of Nuclear autoantigen Sp-100 OS=Homo sapiens GN=SP100                                           |           | 53.24   |
| P23497-4               | SP100_HUMAN Isoform Sp100-C of Nuclear autoantigen Sp-100 OS=Homo sapiens GN=SP100                                           |           | 53.4    |
| P23497-5               | SP100_HUMAN Isoform SpAlt-C of Nuclear autoantigen Sp-100 OS=Homo sapiens GN=SP100                                           |           | 53.24   |
| P23497;P23497-4;P23497 | SP100_HUMAN Nuclear autoantigen Sp-100 OS=Homo sapiens GN=SP100 PE=1 SV=3;>sp P23497-4 SP100_HUMAN Isoform Sp100-            | 7.08E-20  |         |
| P23511                 | NFYA_HUMAN Nuclear transcription factor Y subunit alpha OS=Homo sapiens GN=NFYA PE=1 SV=2                                    |           | 67.3    |
| P23511-2               | NFYA_HUMAN Isoform Short of Nuclear transcription factor Y subunit alpha OS=Homo sapiens GN=NFYA                             |           | 67.3    |
| P23511;P23511-2        | NFYA_HUMAN Nuclear transcription factor Y subunit alpha OS=Homo sapiens GN=NFYA PE=1 SV=2;>sp P23511-2 NFYA_HUMAN Isof       | 5.58E-08  |         |
| P23526                 | SAHH_HUMAN Adenosylhomocysteinase OS=Homo sapiens GN=AHCY PE=1 SV=4                                                          |           | 353.82  |
| P23527                 | H2B1O_HUMAN Histone H2B type 1-O OS=Homo sapiens GN=HIST1H2BO PE=1 SV=3                                                      |           | 732.38  |
| P23528                 | COF1_HUMAN Cofilin-1 OS=Homo sapiens GN=CFL1 PE=1 SV=3                                                                       |           | 922.05  |
| P23588                 | EIF4B_HUMAN Eukaryotic translation initiation factor 4B OS=Homo sapiens GN=EIF4B PE=1 SV=2                                   |           | 266.91  |
| P23634                 | AT2B4_HUMAN Plasma membrane calcium-transporting ATPase 4 OS=Homo sapiens GN=ATP2B4 PE=1 SV=2                                |           | 754.45  |
| P23634-2               | AT2B4_HUMAN Isoform XA of Plasma membrane calcium-transporting ATPase 4 OS=Homo sapiens GN=ATP2B4                            |           | 754.45  |
| P23634-3               | AT2B4_HUMAN Isoform ZA of Plasma membrane calcium-transporting ATPase 4 OS=Homo sapiens GN=ATP2B4                            |           | 754.45  |
| P23634-4               | AT2B4_HUMAN Isoform XK of Plasma membrane calcium-transporting ATPase 4 OS=Homo sapiens GN=ATP2B4                            |           | 754.45  |
| P23634-5               | AT2B4_HUMAN Isoform ZK of Plasma membrane calcium-transporting ATPase 4 OS=Homo sapiens GN=ATP2B4                            |           | 754.45  |
| P23634-6               | AT2B4_HUMAN Isoform XB of Plasma membrane calcium-transporting ATPase 4 OS=Homo sapiens GN=ATP2B4                            |           | 754.45  |
| P23634-7               | AT2B4_HUMAN Isoform ZB of Plasma membrane calcium-transporting ATPase 4 OS=Homo sapiens GN=ATP2B4                            |           | 754.45  |
| P23634-8               | AT2B4_HUMAN Isoform ZD of Plasma membrane calcium-transporting ATPase 4 OS=Homo sapiens GN=ATP2B4                            |           | 754.45  |
| P23634;P23634-8;P23634 | AT2B4_HUMAN Plasma membrane calcium-transporting ATPase 4 OS=Homo sapiens GN=ATP2B4 PE=1 SV=2;>sp P23634-8 AT2B4_H           | 9.90E-158 |         |
| P23743                 | DGKA_HUMAN Diacylglycerol kinase alpha OS=Homo sapiens GN=DGKA PE=1 SV=3                                                     |           | 23.9    |
| P23760                 | PAX3_HUMAN Paired box protein Pax-3 OS=Homo sapiens GN=PAX3 PE=1 SV=2                                                        |           |         |
| P23760-2               | PAX3_HUMAN Isoform Pax3A of Paired box protein Pax-3 OS=Homo sapiens GN=PAX3                                                 |           |         |
| P23760-3               | PAX3_HUMAN Isoform Pax3B of Paired box protein Pax-3 OS=Homo sapiens GN=PAX3                                                 |           |         |
| P23763                 | VAMP1_HUMAN Vesicle-associated membrane protein 1 OS=Homo sapiens GN=VAMP1 PE=1 SV=1                                         |           | 52.49   |
| P23763-2               | VAMP1_HUMAN Isoform 3 of Vesicle-associated membrane protein 1 OS=Homo sapiens GN=VAMP1                                      |           | 52.49   |
| P23763-3               | VAMP1_HUMAN Isoform 2 of Vesicle-associated membrane protein 1 OS=Homo sapiens GN=VAMP1                                      |           | 52.49   |
| P23771-2;P23771        | 2 GATA3_HUMAN Isoform 2 of Trans-acting T-cell-specific transcription factor GATA-3 OS=Homo sapiens GN=GATA3;>sp P23771 GAT/ | 1.11E-69  |         |
| P23786                 | CPT2_HUMAN Carnitine O-palmitoyltransferase 2, mitochondrial OS=Homo sapiens GN=CPT2 PE=1 SV=2                               |           |         |
| P23919                 | KTHY_HUMAN Thymidylate kinase OS=Homo sapiens GN=DTYMK PE=1 SV=4                                                             |           | 190.13  |
| P23921                 | RIR1_HUMAN Ribonucleoside-diphosphate reductase large subunit OS=Homo sapiens GN=RRM1 PE=1 SV=1                              | 1.60E-90  |         |
| P23942                 | PRPH2_HUMAN Peripherin-2 OS=Homo sapiens GN=PRPH2 PE=1 SV=1                                                                  |           |         |
| P23946                 | CMA1_HUMAN Chymase OS=Homo sapiens GN=CMA1 PE=1 SV=1                                                                         | 2.38E-24  |         |
| P24043                 | LAMA2_HUMAN Laminin subunit alpha-2 OS=Homo sapiens GN=LAMA2 PE=1 SV=4                                                       |           |         |
| P24046                 | GBRR1_HUMAN Gamma-aminobutyric acid receptor subunit rho-1 OS=Homo sapiens GN=GABRR1 PE=2 SV=2                               |           |         |
| P24046-2               | GBRR1_HUMAN Isoform 2 of Gamma-aminobutyric acid receptor subunit rho-1 OS=Homo sapiens GN=GABRR1                            |           |         |
| P24298                 | ALAT1_HUMAN Alanine aminotransferase 1 OS=Homo sapiens GN=GPT PE=1 SV=3                                                      |           |         |
| P24385                 | CCND1_HUMAN G1/S-specific cyclin-D1 OS=Homo sapiens GN=CCND1 PE=1 SV=1                                                       | 3.58E-39  |         |
| P24386;P26374          | RAE1_HUMAN Rab proteins geranylgeranyltransferase component A 1 OS=Homo sapiens GN=CHM PE=1 SV=3;>sp P26374 RAE2_HU          | 1.24E-10  |         |
| P24390                 | ERD21_HUMAN ER lumen protein retaining receptor 1 OS=Homo sapiens GN=KDELR1 PE=1 SV=1                                        |           | 77.78   |
| P24468                 | COT2_HUMAN COUP transcription factor 2 OS=Homo sapiens GN=NR2F2 PE=1 SV=1                                                    |           | 57.79   |
| P24534                 | EF1B_HUMAN Elongation factor 1-beta OS=Homo sapiens GN=EEF1B2 PE=1 SV=3                                                      |           | 593.61  |
| P24539                 | AT5F1_HUMAN ATP synthase subunit b, mitochondrial OS=Homo sapiens GN=ATP5F1 PE=1 SV=2                                        |           | 206.02  |

|                          |                                                                                                                          |           |         |
|--------------------------|--------------------------------------------------------------------------------------------------------------------------|-----------|---------|
| P24588                   | AKAP5_HUMAN A-kinase anchor protein 5 OS=Homo sapiens GN=AKAP5 PE=1 SV=3                                                 |           |         |
| P24592                   | IBP6_HUMAN Insulin-like growth factor-binding protein 6 OS=Homo sapiens GN=IGFBP6 PE=1 SV=1                              |           | 27.65   |
| P24593                   | IBP5_HUMAN Insulin-like growth factor-binding protein 5 OS=Homo sapiens GN=IGFBP5 PE=1 SV=1                              | 1.82E-05  |         |
| P24666                   | PPAC_HUMAN Low molecular weight phosphotyrosine protein phosphatase OS=Homo sapiens GN=ACP1 PE=1 SV=3                    |           |         |
| P24666-2                 | PPAC_HUMAN Isoform 2 of Low molecular weight phosphotyrosine protein phosphatase OS=Homo sapiens GN=ACP1                 |           |         |
| P24666-2;D3YTI2          | 2 PPAC_HUMAN Isoform 2 of Low molecular weight phosphotyrosine protein phosphatase OS=Homo sapiens GN=ACP1;>tr D3YTI2 D3 | 2.77E-36  |         |
| P24666-3                 | PPAC_HUMAN Isoform 3 of Low molecular weight phosphotyrosine protein phosphatase OS=Homo sapiens GN=ACP1                 |           |         |
| P24666;P24666-2;P24666-3 | PPAC_HUMAN Low molecular weight phosphotyrosine protein phosphatase OS=Homo sapiens GN=ACP1 PE=1 SV=3;>sp P24666-2 PF    | 3.20E-32  |         |
| P24752                   | THIL_HUMAN Acetyl-CoA acetyltransferase, mitochondrial OS=Homo sapiens GN=ACAT1 PE=1 SV=1                                |           | 631.48  |
| P24821-4;P24821-2        | 4 TENA_HUMAN Isoform 4 of Tenascin OS=Homo sapiens GN=TNC;>sp P24821-2 TENA_HUMAN Isoform 2 of Tenascin OS=Homo sap      | 0         |         |
| P24821-5                 | 5 TENA_HUMAN Isoform 5 of Tenascin OS=Homo sapiens GN=TNC                                                                | 0         |         |
| P24821;P24821-3          | TENA_HUMAN Tenascin OS=Homo sapiens GN=TNC PE=1 SV=3;>sp P24821-3 TENA_HUMAN Isoform 3 of Tenascin OS=Homo sapien        | 0         |         |
| P24844                   | MYL9_HUMAN Myosin regulatory light polypeptide 9 OS=Homo sapiens GN=MYL9 PE=1 SV=4                                       |           | 810.15  |
| P24863                   | CCNC_HUMAN Cyclin-C OS=Homo sapiens GN=CCNC PE=1 SV=2                                                                    |           |         |
| P24928                   | RPB1_HUMAN DNA-directed RNA polymerase II subunit RPB1 OS=Homo sapiens GN=POLR2A PE=1 SV=2                               |           | 229.17  |
| P24941                   | CDK2_HUMAN Cyclin-dependent kinase 2 OS=Homo sapiens GN=CDK2 PE=1 SV=2                                                   |           | 180.97  |
| P24941;B4DDL9            | CDK2_HUMAN Cell division protein kinase 2 OS=Homo sapiens GN=CDK2 PE=1 SV=2;>tr B4DDL9 B4DDL9_HUMAN cDNA FLJ54979,       | 1.39E-14  |         |
| P24941;Q00526            | CDK2_HUMAN Cyclin-dependent kinase 2 OS=Homo sapiens GN=CDK2 PE=1 SV=2;>sp Q00526 CDK3_HUMAN Cyclin-dependent kin        | 1.42E-52  |         |
| P25098;P35626            | ARBK1_HUMAN Beta-adrenergic receptor kinase 1 OS=Homo sapiens GN=ADRBK1 PE=1 SV=2;>sp P35626 ARBK2_HUMAN Beta-adre       | 1.15E-18  |         |
| P25205                   | MCM3_HUMAN DNA replication licensing factor MCM3 OS=Homo sapiens GN=MCM3 PE=1 SV=3                                       |           | 462.86  |
| P25311                   | ZA2G_HUMAN Zinc-alpha-2-glycoprotein OS=Homo sapiens GN=AZGP1 PE=1 SV=2                                                  | 7.37E-218 |         |
| P25325                   | THTM_HUMAN 3-mercaptopyruvate sulfurtransferase OS=Homo sapiens GN=MPST PE=1 SV=3                                        |           | 54.66   |
| P25398                   | RS12_HUMAN 40S ribosomal protein S12 OS=Homo sapiens GN=RPS12 PE=1 SV=3                                                  |           | 497.97  |
| P25445;P25445-6          | TNR6_HUMAN Tumor necrosis factor receptor superfamily member 6 OS=Homo sapiens GN=FAS PE=1 SV=1;>sp P25445-6 TNR6_HU     | 4.05E-09  |         |
| P25490                   | YY1_HUMAN Transcriptional repressor protein YY1 OS=Homo sapiens GN=YY1 PE=1 SV=2                                         |           |         |
| P25685                   | DNJB1_HUMAN DnaJ homolog subfamily B member 1 OS=Homo sapiens GN=DNAJB1 PE=1 SV=4                                        |           | 180.32  |
| P25686                   | DNJB2_HUMAN DnaJ homolog subfamily B member 2 OS=Homo sapiens GN=DNAJB2 PE=2 SV=3                                        |           |         |
| P25686-2                 | DNJB2_HUMAN Isoform 2 of DnaJ homolog subfamily B member 2 OS=Homo sapiens GN=DNAJB2                                     |           |         |
| P25705                   | ATPA_HUMAN ATP synthase subunit alpha, mitochondrial OS=Homo sapiens GN=ATP5A1 PE=1 SV=1                                 |           | 1153.74 |
| P25774                   | CATS_HUMAN Cathepsin S OS=Homo sapiens GN=CTSS PE=1 SV=3                                                                 |           | 48.17   |
| P25786                   | PSA1_HUMAN Proteasome subunit alpha type-1 OS=Homo sapiens GN=PSMA1 PE=1 SV=1                                            |           | 689.28  |
| P25786-2                 | PSA1_HUMAN Isoform Long of Proteasome subunit alpha type-1 OS=Homo sapiens GN=PSMA1                                      |           | 689.28  |
| P25786-2;P25786          | 2 PSA1_HUMAN Isoform Long of Proteasome subunit alpha type-1 OS=Homo sapiens GN=PSMA1;>sp P25786 PSA1_HUMAN Proteasc     | 5.96E-178 |         |
| P25787                   | PSA2_HUMAN Proteasome subunit alpha type-2 OS=Homo sapiens GN=PSMA2 PE=1 SV=2                                            |           | 672.83  |
| P25788                   | PSA3_HUMAN Proteasome subunit alpha type-3 OS=Homo sapiens GN=PSMA3 PE=1 SV=2                                            |           | 360.51  |
| P25788-2                 | PSA3_HUMAN Isoform 2 of Proteasome subunit alpha type-3 OS=Homo sapiens GN=PSMA3                                         |           | 360.51  |
| P25788;P25788-2          | PSA3_HUMAN Proteasome subunit alpha type-3 OS=Homo sapiens GN=PSMA3 PE=1 SV=2;>sp P25788-2 PSA3_HUMAN Isoform 2 of       | 2.79E-147 |         |
| P25789                   | PSA4_HUMAN Proteasome subunit alpha type-4 OS=Homo sapiens GN=PSMA4 PE=1 SV=1                                            |           | 446.36  |
| P25815                   | S100P_HUMAN Protein S100-P OS=Homo sapiens GN=S100P PE=1 SV=2                                                            |           |         |
| P25940                   | CO5A3_HUMAN Collagen alpha-3(V) chain OS=Homo sapiens GN=COL5A3 PE=1 SV=3                                                |           | 28.1    |
| P26006                   | ITA3_HUMAN Integrin alpha-3 OS=Homo sapiens GN=ITGA3 PE=1 SV=4                                                           |           | 952.6   |
| P26006-1;P26006          | 1 ITA3_HUMAN Isoform 2 of Integrin alpha-3 OS=Homo sapiens GN=ITGA3;>sp P26006 ITA3_HUMAN Integrin alpha-3 OS=Homo sa    | 1.29E-219 |         |
| P26006-2                 | ITA3_HUMAN Isoform Alpha-3A of Integrin alpha-3 OS=Homo sapiens GN=ITGA3                                                 |           | 952.6   |
| P26022                   | PTX3_HUMAN Pentraxin-related protein PTX3 OS=Homo sapiens GN=PTX3 PE=1 SV=3                                              |           | 33.85   |
| P26038                   | MOES_HUMAN Moesin OS=Homo sapiens GN=MSN PE=1 SV=3                                                                       |           | 3902.81 |
| P26196                   | DDX6_HUMAN Probable ATP-dependent RNA helicase DDX6 OS=Homo sapiens GN=DDX6 PE=1 SV=2                                    |           | 275.69  |
| P26232                   | CTNA2_HUMAN Catenin alpha-2 OS=Homo sapiens GN=CTNNA2 PE=1 SV=5                                                          |           | 32.97   |
| P26232-2                 | CTNA2_HUMAN Isoform 2 of Catenin alpha-2 OS=Homo sapiens GN=CTNNA2                                                       |           | 32.97   |
| P26232-3                 | CTNA2_HUMAN Isoform 3 of Catenin alpha-2 OS=Homo sapiens GN=CTNNA2                                                       |           | 32.97   |
| P26232-4                 | CTNA2_HUMAN Isoform 4 of Catenin alpha-2 OS=Homo sapiens GN=CTNNA2                                                       |           | 10.63   |
| P26232-5                 | CTNA2_HUMAN Isoform 5 of Catenin alpha-2 OS=Homo sapiens GN=CTNNA2                                                       |           | 39.42   |
| P26232-6                 | CTNA2_HUMAN Isoform 6 of Catenin alpha-2 OS=Homo sapiens GN=CTNNA2                                                       |           | 10.63   |
| P26232;P26232-5;P26232-6 | CTNA2_HUMAN Catenin alpha-2 OS=Homo sapiens GN=CTNNA2 PE=1 SV=5;>sp P26232-5 CTNA2_HUMAN Isoform 5 of Catenin alph       | 3.17E-21  |         |
| P26358                   | DNMT1_HUMAN DNA (cytosine-5)-methyltransferase 1 OS=Homo sapiens GN=DNMT1 PE=1 SV=2                                      |           | 736.05  |
| P26358-2                 | DNMT1_HUMAN Isoform 2 of DNA (cytosine-5)-methyltransferase 1 OS=Homo sapiens GN=DNMT1                                   |           | 723.05  |
| P26358-2;P26358;P26358-3 | 2 DNMT1_HUMAN Isoform 2 of DNA (cytosine-5)-methyltransferase 1 OS=Homo sapiens GN=DNMT1;>sp P26358 DNMT1_HUMAN DN       | 2.63E-118 |         |
| P26358-3                 | DNMT1_HUMAN Isoform 3 of DNA (cytosine-5)-methyltransferase 1 OS=Homo sapiens GN=DNMT1                                   |           | 516.3   |
| P26368                   | U2AF2_HUMAN Splicing factor U2AF 65 kDa subunit OS=Homo sapiens GN=U2AF2 PE=1 SV=4                                       |           | 355.81  |
| P26368-2                 | U2AF2_HUMAN Isoform 2 of Splicing factor U2AF 65 kDa subunit OS=Homo sapiens GN=U2AF2                                    |           | 355.81  |
| P26368;P26368-2          | U2AF2_HUMAN Splicing factor U2AF 65 kDa subunit OS=Homo sapiens GN=U2AF2 PE=1 SV=4;>sp P26368-2 U2AF2_HUMAN Isoform      | 0         |         |
| P26373                   | RL13_HUMAN 60S ribosomal protein L13 OS=Homo sapiens GN=RPL13 PE=1 SV=4                                                  |           | 663.06  |

|                        |                                                                                                                            |          |         |
|------------------------|----------------------------------------------------------------------------------------------------------------------------|----------|---------|
| P26378                 | ELAV4_HUMAN ELAV-like protein 4 OS=Homo sapiens GN=ELAVL4 PE=1 SV=2                                                        |          |         |
| P26378-2               | ELAV4_HUMAN Isoform 2 of ELAV-like protein 4 OS=Homo sapiens GN=ELAVL4                                                     |          |         |
| P26378-3               | ELAV4_HUMAN Isoform 3 of ELAV-like protein 4 OS=Homo sapiens GN=ELAVL4                                                     |          |         |
| P26378-4               | ELAV4_HUMAN Isoform 4 of ELAV-like protein 4 OS=Homo sapiens GN=ELAVL4                                                     |          |         |
| P26439                 | 3BHS2_HUMAN 3 beta-hydroxysteroid dehydrogenase/Delta 5-->4-isomerase type 2 OS=Homo sapiens GN=HSD3B2 PE=1 SV=2           |          | 5.47    |
| P26440                 | IVD_HUMAN Isovaleryl-CoA dehydrogenase, mitochondrial OS=Homo sapiens GN=IVD PE=1 SV=1                                     |          | 62.71   |
| P26447                 | S10A4_HUMAN Protein S100-A4 OS=Homo sapiens GN=S100A4 PE=1 SV=1                                                            |          | 71.81   |
| P26583                 | HMGB2_HUMAN High mobility group protein B2 OS=Homo sapiens GN=HMGB2 PE=1 SV=2                                              |          | 669.74  |
| P26599                 | PTBP1_HUMAN Polypyrimidine tract-binding protein 1 OS=Homo sapiens GN=PTBP1 PE=1 SV=1                                      |          | 1060.03 |
| P26599-2               | PTBP1_HUMAN Isoform 2 of Polypyrimidine tract-binding protein 1 OS=Homo sapiens GN=PTBP1                                   |          | 1060.03 |
| P26599-2;P26599        | 2 PTBP1_HUMAN Isoform 2 of Polypyrimidine tract-binding protein 1 OS=Homo sapiens GN=PTBP1;>sp P26599 PTBP1_HUMAN Polyp    | 0        |         |
| P26639                 | SYTC_HUMAN Threonyl-tRNA synthetase, cytoplasmic OS=Homo sapiens GN=TARS PE=1 SV=3                                         |          | 670.45  |
| P26640                 | SYVC_HUMAN Valyl-tRNA synthetase OS=Homo sapiens GN=VAR5 PE=1 SV=4                                                         |          | 888.51  |
| P26641                 | EF1G_HUMAN Elongation factor 1-gamma OS=Homo sapiens GN=EEF1G PE=1 SV=3                                                    |          | 1100.96 |
| P26885                 | FKBP2_HUMAN Peptidyl-prolyl cis-trans isomerase FKBP2 OS=Homo sapiens GN=FKBP2 PE=1 SV=2                                   |          | 227.42  |
| P27105                 | STOM_HUMAN Erythrocyte band 7 integral membrane protein OS=Homo sapiens GN=STOM PE=1 SV=3                                  |          | 125.83  |
| P27144                 | KAD4_HUMAN Adenylate kinase isoenzyme 4, mitochondrial OS=Homo sapiens GN=AK4 PE=1 SV=1                                    |          | 492.91  |
| P27169                 | PON1_HUMAN Serum paraoxonase/arylesterase 1 OS=Homo sapiens GN=PON1 PE=1 SV=3                                              | 1.01E-15 |         |
| P27216-2;P27216        | 2 ANX13_HUMAN Isoform B of Annexin A13 OS=Homo sapiens GN=ANXA13;>sp P27216 ANX13_HUMAN Annexin A13 OS=Homo sap            | 7.30E-08 |         |
| P27338                 | AOFB_HUMAN Amine oxidase [flavin-containing] B OS=Homo sapiens GN=MAOB PE=1 SV=3                                           | 2.01E-62 |         |
| P27348                 | 1433T_HUMAN 14-3-3 protein theta OS=Homo sapiens GN=YWHAQ PE=1 SV=1                                                        |          | 1143.1  |
| P27352                 | IF_HUMAN Gastric intrinsic factor OS=Homo sapiens GN=GIF PE=1 SV=2                                                         |          | 22.14   |
| P27352-2               | IF_HUMAN Isoform 2 of Gastric intrinsic factor OS=Homo sapiens GN=GIF                                                      |          | 22.14   |
| P27361                 | MK03_HUMAN Mitogen-activated protein kinase 3 OS=Homo sapiens GN=MAPK3 PE=1 SV=4                                           |          | 27.93   |
| P27449                 | VATL_HUMAN V-type proton ATPase 16 kDa proteolipid subunit OS=Homo sapiens GN=ATP6V0C PE=1 SV=1                            |          | 56.88   |
| P27482                 | CALL3_HUMAN Calmodulin-like protein 3 OS=Homo sapiens GN=CALML3 PE=1 SV=2                                                  |          | 14.07   |
| P27635                 | RL10_HUMAN 60S ribosomal protein L10 OS=Homo sapiens GN=RPL10 PE=1 SV=4                                                    |          | 1138.91 |
| P27658                 | CO8A1_HUMAN Collagen alpha-1(VIII) chain OS=Homo sapiens GN=COL8A1 PE=1 SV=2                                               |          | 97.02   |
| P27694                 | RFA1_HUMAN Replication protein A 70 kDa DNA-binding subunit OS=Homo sapiens GN=RPA1 PE=1 SV=2                              |          | 326.3   |
| P27695                 | APEX1_HUMAN DNA-(apurinic or apyrimidinic site) lyase OS=Homo sapiens GN=APEX1 PE=1 SV=2                                   |          | 623.31  |
| P27701                 | CD82_HUMAN CD82 antigen OS=Homo sapiens GN=CD82 PE=1 SV=1                                                                  |          | 186.28  |
| P27707                 | DCK_HUMAN Deoxycytidine kinase OS=Homo sapiens GN=DCK PE=1 SV=1                                                            | 5.35E-36 |         |
| P27708                 | PYR1_HUMAN CAD protein OS=Homo sapiens GN=CAD PE=1 SV=3                                                                    |          | 116.29  |
| P27797                 | CALR_HUMAN Calreticulin OS=Homo sapiens GN=CALR PE=1 SV=1                                                                  |          | 1143.12 |
| P27816                 | MAP4_HUMAN Microtubule-associated protein 4 OS=Homo sapiens GN=MAP4 PE=1 SV=3                                              |          | 1481.49 |
| P27816-2               | MAP4_HUMAN Isoform 2 of Microtubule-associated protein 4 OS=Homo sapiens GN=MAP4                                           |          | 1283.22 |
| P27816-4               | MAP4_HUMAN Isoform 4 of Microtubule-associated protein 4 OS=Homo sapiens GN=MAP4                                           |          | 552.76  |
| P27816-5               | MAP4_HUMAN Isoform 5 of Microtubule-associated protein 4 OS=Homo sapiens GN=MAP4                                           |          | 774.5   |
| P27816-6               | MAP4_HUMAN Isoform 6 of Microtubule-associated protein 4 OS=Homo sapiens GN=MAP4                                           |          | 1481.49 |
| P27816;P27816-6;P27816 | MAP4_HUMAN Microtubule-associated protein 4 OS=Homo sapiens GN=MAP4 PE=1 SV=3;>sp P27816-6 MAP4_HUMAN Isoform 6 of M       | 0        |         |
| P27824                 | CALX_HUMAN Calnexin OS=Homo sapiens GN=CANX PE=1 SV=2                                                                      |          | 1487.72 |
| P27986-4;P27986        | 4 P85A_HUMAN Isoform 4 of Phosphatidylinositol 3-kinase regulatory subunit alpha OS=Homo sapiens GN=PIK3R1;>sp P27986 P85A | 1.54E-13 |         |
| P28062                 | PSB8_HUMAN Proteasome subunit beta type-8 OS=Homo sapiens GN=PSMB8 PE=1 SV=3                                               |          | 278.16  |
| P28062-2               | PSB8_HUMAN Isoform 2 of Proteasome subunit beta type-8 OS=Homo sapiens GN=PSMB8                                            |          | 282.78  |
| P28062;P28062-2        | PSB8_HUMAN Proteasome subunit beta type-8 OS=Homo sapiens GN=PSMB8 PE=1 SV=3;>sp P28062-2 PSB8_HUMAN Isoform 2 of I        | 3.03E-55 |         |
| P28065                 | PSB9_HUMAN Proteasome subunit beta type-9 OS=Homo sapiens GN=PSMB9 PE=1 SV=2                                               |          | 121.49  |
| P28065-2               | PSB9_HUMAN Isoform LMP2.S of Proteasome subunit beta type-9 OS=Homo sapiens GN=PSMB9                                       |          | 121.49  |
| P28065;P28065-2        | PSB9_HUMAN Proteasome subunit beta type-9 OS=Homo sapiens GN=PSMB9 PE=1 SV=2;>sp P28065-2 PSB9_HUMAN Isoform LMP2          | 7.46E-24 |         |
| P28066                 | PSA5_HUMAN Proteasome subunit alpha type-5 OS=Homo sapiens GN=PSMA5 PE=1 SV=3                                              |          | 467.32  |
| P28068                 | DMB_HUMAN HLA class II histocompatibility antigen, DM beta chain OS=Homo sapiens GN=HLA-DMB PE=1 SV=1                      | 1.42E-08 |         |
| P28070                 | PSB4_HUMAN Proteasome subunit beta type-4 OS=Homo sapiens GN=PSMB4 PE=1 SV=4                                               |          | 580.29  |
| P28072                 | PSB6_HUMAN Proteasome subunit beta type-6 OS=Homo sapiens GN=PSMB6 PE=1 SV=4                                               |          | 304.32  |
| P28074                 | PSB5_HUMAN Proteasome subunit beta type-5 OS=Homo sapiens GN=PSMB5 PE=1 SV=3                                               |          | 916.85  |
| P28074-2               | PSB5_HUMAN Isoform 2 of Proteasome subunit beta type-5 OS=Homo sapiens GN=PSMB5                                            |          | 407.13  |
| P28074;P28074-2        | PSB5_HUMAN Proteasome subunit beta type-5 OS=Homo sapiens GN=PSMB5 PE=1 SV=3;>sp P28074-2 PSB5_HUMAN Isoform 2 of I        | 1.56E-70 |         |
| P28161                 | GSTM2_HUMAN Glutathione S-transferase Mu 2 OS=Homo sapiens GN=GSTM2 PE=1 SV=2                                              | 9.26E-86 |         |
| P28288                 | ABCD3_HUMAN ATP-binding cassette sub-family D member 3 OS=Homo sapiens GN=ABCD3 PE=1 SV=1                                  |          | 165.35  |
| P28288-2               | ABCD3_HUMAN Isoform 2 of ATP-binding cassette sub-family D member 3 OS=Homo sapiens GN=ABCD3                               |          | 165.35  |
| P28288-3               | ABCD3_HUMAN Isoform 3 of ATP-binding cassette sub-family D member 3 OS=Homo sapiens GN=ABCD3                               |          | 108.28  |
| P28288;P28288-2        | ABCD3_HUMAN ATP-binding cassette sub-family D member 3 OS=Homo sapiens GN=ABCD3 PE=1 SV=1;>sp P28288-2 ABCD3_HUM           | 1.39E-14 |         |
| P28290                 | SSFA2_HUMAN Sperm-specific antigen 2 OS=Homo sapiens GN=SSFA2 PE=1 SV=3                                                    |          | 27.58   |

|                          |                                                                                                                                                                                                                 |           |        |
|--------------------------|-----------------------------------------------------------------------------------------------------------------------------------------------------------------------------------------------------------------|-----------|--------|
| P28290-2                 | SSFA2_HUMAN Isoform 2 of Sperm-specific antigen 2 OS=Homo sapiens GN=SSFA2                                                                                                                                      |           | 27.58  |
| P28331                   | NDUS1_HUMAN NADH-ubiquinone oxidoreductase 75 kDa subunit, mitochondrial OS=Homo sapiens GN=NDUFS1 PE=1 SV=3                                                                                                    |           | 231.28 |
| P28332-2;P28332;Q8IUN7   | ADH6_HUMAN Isoform 2 of Alcohol dehydrogenase 6 OS=Homo sapiens GN=ADH6;>sp P28332 ADH6_HUMAN Alcohol dehydrogenase 6 OS=Homo sapiens GN=ADH6                                                                   | 6.97E-05  |        |
| P28340                   | DPOD1_HUMAN DNA polymerase delta catalytic subunit OS=Homo sapiens GN=POLD1 PE=1 SV=2                                                                                                                           |           | 93.24  |
| P28347                   | TEAD1_HUMAN Transcriptional enhancer factor TEF-1 OS=Homo sapiens GN=TEAD1 PE=1 SV=2                                                                                                                            |           | 22.7   |
| P28360                   | MSX1_HUMAN Homeobox protein MSX-1 OS=Homo sapiens GN=MSX1 PE=1 SV=2                                                                                                                                             |           |        |
| P28370                   | SMCA1_HUMAN Probable global transcription activator SNF2L1 OS=Homo sapiens GN=SMARCA1 PE=1 SV=2                                                                                                                 |           | 147.73 |
| P28370-2                 | SMCA1_HUMAN Isoform 2 of Probable global transcription activator SNF2L1 OS=Homo sapiens GN=SMARCA1                                                                                                              |           | 147.73 |
| P28370;P28370-2          | SMCA1_HUMAN Probable global transcription activator SNF2L1 OS=Homo sapiens GN=SMARCA1 PE=1 SV=2;>sp P28370-2 SMCA1_HUMAN Isoform 2 of Probable global transcription activator SNF2L1 OS=Homo sapiens GN=SMARCA1 | 5.49E-36  |        |
| P28476                   | GBRR2_HUMAN Gamma-aminobutyric acid receptor subunit rho-2 OS=Homo sapiens GN=GABRR2 PE=2 SV=4                                                                                                                  |           |        |
| P28482                   | MK01_HUMAN Mitogen-activated protein kinase 1 OS=Homo sapiens GN=MAPK1 PE=1 SV=3                                                                                                                                |           | 50.06  |
| P28676                   | GRAN_HUMAN Grancalcin OS=Homo sapiens GN=GCA PE=1 SV=2                                                                                                                                                          | 3.69E-18  |        |
| P28749                   | RBL1_HUMAN Retinoblastoma-like protein 1 OS=Homo sapiens GN=RBL1 PE=1 SV=3                                                                                                                                      |           |        |
| P28749-2                 | RBL1_HUMAN Isoform 2 of Retinoblastoma-like protein 1 OS=Homo sapiens GN=RBL1                                                                                                                                   |           |        |
| P28799                   | GRN_HUMAN Granulins OS=Homo sapiens GN=GRN PE=1 SV=2                                                                                                                                                            |           | 177.41 |
| P28799-2                 | GRN_HUMAN Isoform 2 of Granulins OS=Homo sapiens GN=GRN                                                                                                                                                         |           | 136.92 |
| P28838                   | AMPL_HUMAN Cytosol aminopeptidase OS=Homo sapiens GN=LAP3 PE=1 SV=3                                                                                                                                             |           | 194.99 |
| P28838-2                 | AMPL_HUMAN Isoform 2 of Cytosol aminopeptidase OS=Homo sapiens GN=LAP3                                                                                                                                          |           | 194.99 |
| P28838;P28838-2          | AMPL_HUMAN Cytosol aminopeptidase OS=Homo sapiens GN=LAP3 PE=1 SV=3;>sp P28838-2 AMPL_HUMAN Isoform 2 of Cytosol aminopeptidase OS=Homo sapiens GN=LAP3                                                         | 0         |        |
| P28907                   | CD38_HUMAN ADP-ribosyl cyclase 1 OS=Homo sapiens GN=CD38 PE=1 SV=2                                                                                                                                              | 1.64E-06  |        |
| P29034                   | S10A2_HUMAN Protein S100-A2 OS=Homo sapiens GN=S100A2 PE=1 SV=3                                                                                                                                                 | 1.92E-08  |        |
| P29083                   | T2EA_HUMAN General transcription factor IIE subunit 1 OS=Homo sapiens GN=GTF2E1 PE=1 SV=2                                                                                                                       | 2.16E-07  |        |
| P29084                   | T2EB_HUMAN Transcription initiation factor IIE subunit beta OS=Homo sapiens GN=GTF2E2 PE=1 SV=1                                                                                                                 | 3.70E-06  |        |
| P29120                   | NEC1_HUMAN Neuroendocrine convertase 1 OS=Homo sapiens GN=PCSK1 PE=1 SV=2                                                                                                                                       |           | 33.17  |
| P29144                   | TPP2_HUMAN Tripeptidyl-peptidase 2 OS=Homo sapiens GN=TPP2 PE=1 SV=4                                                                                                                                            |           | 39.84  |
| P29218                   | IMPA1_HUMAN Inositol monophosphatase 1 OS=Homo sapiens GN=IMPA1 PE=1 SV=1                                                                                                                                       |           |        |
| P29279                   | CTGF_HUMAN Connective tissue growth factor OS=Homo sapiens GN=CTGF PE=1 SV=2                                                                                                                                    |           | 142.73 |
| P29279-2                 | CTGF_HUMAN Isoform 2 of Connective tissue growth factor OS=Homo sapiens GN=CTGF                                                                                                                                 |           | 101.55 |
| P29279;P29279-2          | CTGF_HUMAN Connective tissue growth factor OS=Homo sapiens GN=CTGF PE=1 SV=2;>sp P29279-2 CTGF_HUMAN Isoform 2 of Connective tissue growth factor OS=Homo sapiens GN=CTGF                                       | 1.95E-07  |        |
| P29317                   | EPHA2_HUMAN Ephrin type-A receptor 2 OS=Homo sapiens GN=EPHA2 PE=1 SV=2                                                                                                                                         |           | 867.41 |
| P29320                   | EPHA3_HUMAN Ephrin type-A receptor 3 OS=Homo sapiens GN=EPHA3 PE=1 SV=2                                                                                                                                         |           | 43.02  |
| P29320-2                 | EPHA3_HUMAN Isoform 2 of Ephrin type-A receptor 3 OS=Homo sapiens GN=EPHA3                                                                                                                                      |           | 3.41   |
| P29322                   | EPHA8_HUMAN Ephrin type-A receptor 8 OS=Homo sapiens GN=EPHA8 PE=1 SV=2                                                                                                                                         |           | 41.17  |
| P29323                   | EPHB2_HUMAN Ephrin type-B receptor 2 OS=Homo sapiens GN=EPHB2 PE=1 SV=5                                                                                                                                         |           | 93.96  |
| P29323-2                 | EPHB2_HUMAN Isoform 2 of Ephrin type-B receptor 2 OS=Homo sapiens GN=EPHB2                                                                                                                                      |           | 93.96  |
| P29323-3                 | EPHB2_HUMAN Isoform 3 of Ephrin type-B receptor 2 OS=Homo sapiens GN=EPHB2                                                                                                                                      |           | 93.96  |
| P29323;P29323-3;P29323   | EPHB2_HUMAN Ephrin type-B receptor 2 OS=Homo sapiens GN=EPHB2 PE=1 SV=5;>sp P29323-3 EPHB2_HUMAN Isoform 3 of Ephrin type-B receptor 2 OS=Homo sapiens GN=EPHB2                                                 | 2.13E-52  |        |
| P29350-3;P29350;P29350 3 | PTN6_HUMAN Isoform 2 of Tyrosine-protein phosphatase non-receptor type 6 OS=Homo sapiens GN=PTPN6;>sp P29350 PTN6_HUMAN Isoform 3 of Tyrosine-protein phosphatase non-receptor type 6 OS=Homo sapiens GN=PTPN6  | 0         |        |
| P29353-6;P29353;B4DL026  | SHC1_HUMAN Isoform 6 of SHC-transforming protein 1 OS=Homo sapiens GN=SHC1;>sp P29353 SHC1_HUMAN SHC-transforming protein 1 OS=Homo sapiens GN=SHC1                                                             | 2.52E-09  |        |
| P29372                   | 3MG_HUMAN DNA-3-methyladenine glycosylase OS=Homo sapiens GN=MPG PE=1 SV=3                                                                                                                                      |           | 43.2   |
| P29372-2                 | 3MG_HUMAN Isoform 2 of DNA-3-methyladenine glycosylase OS=Homo sapiens GN=MPG                                                                                                                                   |           | 43.2   |
| P29373                   | RABP2_HUMAN Cellular retinoic acid-binding protein 2 OS=Homo sapiens GN=CRABP2 PE=1 SV=2                                                                                                                        |           |        |
| P29401                   | TKT_HUMAN Transketolase OS=Homo sapiens GN=TKT PE=1 SV=3                                                                                                                                                        |           | 809.29 |
| P29466;P29466-2;P29466   | CASP1_HUMAN Caspase-1 OS=Homo sapiens GN=CASP1 PE=1 SV=1;>sp P29466-2 CASP1_HUMAN Isoform Beta of Caspase-1 OS=Homo sapiens GN=CASP1                                                                            | 4.11E-108 |        |
| P29508                   | SPB3_HUMAN Serpin B3 OS=Homo sapiens GN=SERPINB3 PE=1 SV=2                                                                                                                                                      |           |        |
| P29508-2                 | SPB3_HUMAN Isoform 2 of Serpin B3 OS=Homo sapiens GN=SERPINB3                                                                                                                                                   |           |        |
| P29536                   | LMOD1_HUMAN Leiomodrin-1 OS=Homo sapiens GN=LMOD1 PE=1 SV=3                                                                                                                                                     |           |        |
| P29536-2                 | LMOD1_HUMAN Isoform 2 of Leiomodrin-1 OS=Homo sapiens GN=LMOD1                                                                                                                                                  |           |        |
| P29558                   | RBMS1_HUMAN RNA-binding motif, single-stranded-interacting protein 1 OS=Homo sapiens GN=RBMS1 PE=1 SV=3                                                                                                         |           | 55.15  |
| P29558-2                 | RBMS1_HUMAN Isoform 2 of RNA-binding motif, single-stranded-interacting protein 1 OS=Homo sapiens GN=RBMS1                                                                                                      |           | 55.15  |
| P29590                   | PML_HUMAN Protein PML OS=Homo sapiens GN=PML PE=1 SV=3                                                                                                                                                          |           |        |
| P29590-10                | PML_HUMAN Isoform PML-7 of Protein PML OS=Homo sapiens GN=PML                                                                                                                                                   |           |        |
| P29590-11                | PML_HUMAN Isoform PML-11 of Protein PML OS=Homo sapiens GN=PML                                                                                                                                                  |           |        |
| P29590-12                | PML_HUMAN Isoform PML-12 of Protein PML OS=Homo sapiens GN=PML                                                                                                                                                  |           |        |
| P29590-13                | PML_HUMAN Isoform PML-13 of Protein PML OS=Homo sapiens GN=PML                                                                                                                                                  |           |        |
| P29590-14                | PML_HUMAN Isoform PML-14 of Protein PML OS=Homo sapiens GN=PML                                                                                                                                                  |           |        |
| P29590-2                 | PML_HUMAN Isoform PML-5 of Protein PML OS=Homo sapiens GN=PML                                                                                                                                                   |           |        |
| P29590-3                 | PML_HUMAN Isoform PML-8 of Protein PML OS=Homo sapiens GN=PML                                                                                                                                                   |           |        |
| P29590-4                 | PML_HUMAN Isoform PML-6 of Protein PML OS=Homo sapiens GN=PML                                                                                                                                                   |           |        |
| P29590-5                 | PML_HUMAN Isoform PML-4 of Protein PML OS=Homo sapiens GN=PML                                                                                                                                                   |           |        |
| P29590-6                 | PML_HUMAN Isoform PML-9 of Protein PML OS=Homo sapiens GN=PML                                                                                                                                                   |           |        |

|                          |                                                                                                                                       |           |         |
|--------------------------|---------------------------------------------------------------------------------------------------------------------------------------|-----------|---------|
| P29590-7                 | PML_HUMAN Isoform PML-10 of Protein PML OS=Homo sapiens GN=PML                                                                        |           |         |
| P29590-8                 | PML_HUMAN Isoform PML-2 of Protein PML OS=Homo sapiens GN=PML                                                                         |           |         |
| P29590-9                 | PML_HUMAN Isoform PML-3 of Protein PML OS=Homo sapiens GN=PML                                                                         |           |         |
| P29590;P29590-7;P29590   | PML_HUMAN Protein PML OS=Homo sapiens GN=PML PE=1 SV=3;>sp P29590-7 PML_HUMAN Isoform PML-10 of Protein PML OS=Hor                    | 2.08E-155 |         |
| P29590;P29590-7;Q59FP9   | PML_HUMAN Probable transcription factor PML OS=Homo sapiens GN=PML PE=1 SV=3;>sp P29590-7 PML_HUMAN Isoform PML-5 of                  | 5.47E-114 |         |
| P29597                   | TYK2_HUMAN Non-receptor tyrosine-protein kinase TYK2 OS=Homo sapiens GN=TYK2 PE=1 SV=3                                                |           |         |
| P29622                   | KAIN_HUMAN Kallistatin OS=Homo sapiens GN=SERPINA4 PE=1 SV=3                                                                          |           | 21.82   |
| P29692                   | EF1D_HUMAN Elongation factor 1-delta OS=Homo sapiens GN=EEF1D PE=1 SV=5                                                               |           | 919.26  |
| P29692-2                 | EF1D_HUMAN Isoform 2 of Elongation factor 1-delta OS=Homo sapiens GN=EEF1D                                                            |           | 920.19  |
| P29692-2;P29692          | 2 EF1D_HUMAN Isoform 2 of Elongation factor 1-delta OS=Homo sapiens GN=EEF1D;>sp P29692 EF1D_HUMAN Elongation factor 1-c              | 0         |         |
| P29728;P29728-2          | OAS2_HUMAN 2-5-oligoadenylate synthase 2 OS=Homo sapiens GN=OAS2 PE=1 SV=3;>sp P29728-2 OAS2_HUMAN Isoform p69 of :                   | 6.62E-190 |         |
| P29762                   | RABP1_HUMAN Cellular retinoic acid-binding protein 1 OS=Homo sapiens GN=CRABP1 PE=1 SV=2                                              |           |         |
| P29803                   | ODPAT_HUMAN Pyruvate dehydrogenase E1 component subunit alpha, testis-specific form, mitochondrial OS=Homo sapiens GN=PDHA2 PE=1 SV=1 |           | 122.06  |
| P29966                   | MARCS_HUMAN Myristoylated alanine-rich C-kinase substrate OS=Homo sapiens GN=MARCKS PE=1 SV=4                                         |           | 397.04  |
| P29972                   | AQP1_HUMAN Aquaporin-1 OS=Homo sapiens GN=AQP1 PE=1 SV=3                                                                              | 5.37E-27  |         |
| P29992                   | GNA11_HUMAN Guanine nucleotide-binding protein subunit alpha-11 OS=Homo sapiens GN=GNA11 PE=1 SV=2                                    |           | 327.68  |
| P30038                   | AL4A1_HUMAN Delta-1-pyrroline-5-carboxylate dehydrogenase, mitochondrial OS=Homo sapiens GN=ALDH4A1 PE=1 SV=3                         |           |         |
| P30040                   | ERP29_HUMAN Endoplasmic reticulum resident protein 29 OS=Homo sapiens GN=ERP29 PE=1 SV=4                                              |           | 784.78  |
| P30041                   | PRDX6_HUMAN Peroxiredoxin-6 OS=Homo sapiens GN=PRDX6 PE=1 SV=3                                                                        |           | 920.43  |
| P30042                   | ES1_HUMAN ES1 protein homolog, mitochondrial OS=Homo sapiens GN=C21orf33 PE=1 SV=3                                                    |           | 105.48  |
| P30042-2                 | ES1_HUMAN Isoform Short of ES1 protein homolog, mitochondrial OS=Homo sapiens GN=C21orf33                                             |           | 105.48  |
| P30042;P30042-2          | ES1_HUMAN ES1 protein homolog, mitochondrial OS=Homo sapiens GN=C21orf33 PE=1 SV=3;>sp P30042-2 ES1_HUMAN Isoform S                   | 3.37E-56  |         |
| P30043                   | BLVRB_HUMAN Flavin reductase OS=Homo sapiens GN=BLVRB PE=1 SV=3                                                                       |           | 200.41  |
| P30044                   | PRDX5_HUMAN Peroxiredoxin-5, mitochondrial OS=Homo sapiens GN=PRDX5 PE=1 SV=4                                                         |           | 381.07  |
| P30044-2                 | PRDX5_HUMAN Isoform Cytoplasmic+peroxisomal of Peroxiredoxin-5, mitochondrial OS=Homo sapiens GN=PRDX5                                |           | 386.82  |
| P30044;P30044-2          | PRDX5_HUMAN Peroxiredoxin-5, mitochondrial OS=Homo sapiens GN=PRDX5 PE=1 SV=4;>sp P30044-2 PRDX5_HUMAN Isoform Cyt                    | 6.99E-167 |         |
| P30046                   | DOPD_HUMAN D-dopachrome decarboxylase OS=Homo sapiens GN=DDT PE=1 SV=3                                                                |           | 111.07  |
| P30047                   | GFRP_HUMAN GTP cyclohydrolase 1 feedback regulatory protein OS=Homo sapiens GN=GCHFR PE=1 SV=3                                        | 1.53E-08  |         |
| P30048                   | PRDX3_HUMAN Thioredoxin-dependent peroxide reductase, mitochondrial OS=Homo sapiens GN=PRDX3 PE=1 SV=3                                |           | 371.09  |
| P30049                   | ATPD_HUMAN ATP synthase subunit delta, mitochondrial OS=Homo sapiens GN=ATP5D PE=1 SV=2                                               |           | 163.67  |
| P30050                   | RL12_HUMAN 60S ribosomal protein L12 OS=Homo sapiens GN=RPL12 PE=1 SV=1                                                               |           | 646.06  |
| P30050-2                 | RL12_HUMAN Isoform 2 of 60S ribosomal protein L12 OS=Homo sapiens GN=RPL12                                                            |           | 491.49  |
| P30050;P30050-2          | RL12_HUMAN 60S ribosomal protein L12 OS=Homo sapiens GN=RPL12 PE=1 SV=1;>sp P30050-2 RL12_HUMAN Isoform 2 of 60S rib                  | 0         |         |
| P30084                   | ECHM_HUMAN Enoyl-CoA hydratase, mitochondrial OS=Homo sapiens GN=ECHS1 PE=1 SV=4                                                      |           | 340.72  |
| P30085                   | KCY_HUMAN UMP-CMP kinase OS=Homo sapiens GN=CMKP1 PE=1 SV=3                                                                           |           | 348.69  |
| P30086                   | PEBP1_HUMAN Phosphatidylethanolamine-binding protein 1 OS=Homo sapiens GN=PEBP1 PE=1 SV=3                                             |           | 549.13  |
| P30101                   | PDIA3_HUMAN Protein disulfide-isomerase A3 OS=Homo sapiens GN=PDIA3 PE=1 SV=4                                                         |           | 1746.83 |
| P30153                   | 2AAA_HUMAN Serine/threonine-protein phosphatase 2A 65 kDa regulatory subunit A alpha isoform OS=Homo sapiens GN=PPP2R1A PE=1 SV=4     |           | 465.55  |
| P30154                   | 2AAB_HUMAN Serine/threonine-protein phosphatase 2A 65 kDa regulatory subunit A beta isoform OS=Homo sapiens GN=PPP2R1B PE=1 SV=3      |           | 75.54   |
| P30154-2                 | 2AAB_HUMAN Isoform 2 of Serine/threonine-protein phosphatase 2A 65 kDa regulatory subunit A beta isoform OS=Homo sapiens GN=PPP2R1B   |           | 75.54   |
| P30154-2;A8MY67;P30154-2 | 2 2AAB_HUMAN Isoform 2 of Serine/threonine-protein phosphatase 2A 65 kDa regulatory subunit A beta isoform OS=Homo sapiens G          | 5.36E-101 |         |
| P30154;P30154-2          | 2AAB_HUMAN Serine/threonine-protein phosphatase 2A 65 kDa regulatory subunit A beta isoform OS=Homo sapiens GN=PPP2R1B PE             | 1.17E-103 |         |
| P30260                   | CDC27_HUMAN Cell division cycle protein 27 homolog OS=Homo sapiens GN=CDC27 PE=1 SV=2                                                 |           |         |
| P30273                   | FCERG_HUMAN High affinity immunoglobulin epsilon receptor subunit gamma OS=Homo sapiens GN=FCER1G PE=1 SV=1                           | 1.87E-24  |         |
| P30405                   | PPIF_HUMAN Peptidyl-prolyl cis-trans isomerase F, mitochondrial OS=Homo sapiens GN=PPIF PE=1 SV=1                                     |           | 113.65  |
| P30408                   | T4S1_HUMAN Transmembrane 4 L6 family member 1 OS=Homo sapiens GN=TM4SF1 PE=1 SV=1                                                     |           | 57.86   |
| P30419                   | NMT1_HUMAN Glycylpeptide N-tetradecanoyltransferase 1 OS=Homo sapiens GN=NMT1 PE=1 SV=2                                               |           | 406.4   |
| P30419-2                 | NMT1_HUMAN Isoform Short of Glycylpeptide N-tetradecanoyltransferase 1 OS=Homo sapiens GN=NMT1                                        |           | 322.44  |
| P30419;P30419-2          | NMT1_HUMAN Glycylpeptide N-tetradecanoyltransferase 1 OS=Homo sapiens GN=NMT1 PE=1 SV=2;>sp P30419-2 NMT1_HUMAN Isc                   | 4.64E-122 |         |
| P30443                   | 1A01_HUMAN HLA class I histocompatibility antigen, A-1 alpha chain OS=Homo sapiens GN=HLA-A PE=1 SV=1                                 |           | 436.03  |
| P30447                   | 1A23_HUMAN HLA class I histocompatibility antigen, A-23 alpha chain OS=Homo sapiens GN=HLA-A PE=1 SV=1                                |           | 596.69  |
| P30450                   | 1A26_HUMAN HLA class I histocompatibility antigen, A-26 alpha chain OS=Homo sapiens GN=HLA-A PE=1 SV=2                                |           | 587.75  |
| P30453                   | 1A34_HUMAN HLA class I histocompatibility antigen, A-34 alpha chain OS=Homo sapiens GN=HLA-A PE=1 SV=1                                |           | 663.45  |
| P30455                   | 1A36_HUMAN HLA class I histocompatibility antigen, A-36 alpha chain OS=Homo sapiens GN=HLA-A PE=1 SV=1                                |           | 436.03  |
| P30456                   | 1A43_HUMAN HLA class I histocompatibility antigen, A-43 alpha chain OS=Homo sapiens GN=HLA-A PE=2 SV=1                                |           | 587.75  |
| P30457                   | 1A66_HUMAN HLA class I histocompatibility antigen, A-66 alpha chain OS=Homo sapiens GN=HLA-A PE=1 SV=1                                |           | 587.75  |
| P30459                   | 1A74_HUMAN HLA class I histocompatibility antigen, A-74 alpha chain OS=Homo sapiens GN=HLA-A PE=1 SV=1                                |           | 657.24  |
| P30460                   | 1B08_HUMAN HLA class I histocompatibility antigen, B-8 alpha chain OS=Homo sapiens GN=HLA-B PE=1 SV=1                                 |           | 500.32  |
| P30461                   | 1B13_HUMAN HLA class I histocompatibility antigen, B-13 alpha chain OS=Homo sapiens GN=HLA-B PE=2 SV=1                                |           | 450.59  |
| P30462                   | 1B14_HUMAN HLA class I histocompatibility antigen, B-14 alpha chain OS=Homo sapiens GN=HLA-B PE=1 SV=1                                |           | 332.41  |
| P30464                   | 1B15_HUMAN HLA class I histocompatibility antigen, B-15 alpha chain OS=Homo sapiens GN=HLA-B PE=1 SV=2                                |           | 517.72  |



|                          |                                                                                                                             |           |        |
|--------------------------|-----------------------------------------------------------------------------------------------------------------------------|-----------|--------|
| P30466                   | 1B18_HUMAN HLA class I histocompatibility antigen, B-18 alpha chain OS=Homo sapiens GN=HLA-B PE=1 SV=1                      |           | 420.29 |
| P30475                   | 1B39_HUMAN HLA class I histocompatibility antigen, B-39 alpha chain OS=Homo sapiens GN=HLA-B PE=2 SV=1                      |           | 382.83 |
| P30479                   | 1B41_HUMAN HLA class I histocompatibility antigen, B-41 alpha chain OS=Homo sapiens GN=HLA-B PE=1 SV=1                      |           | 684.43 |
| P30480                   | 1B42_HUMAN HLA class I histocompatibility antigen, B-42 alpha chain OS=Homo sapiens GN=HLA-B PE=1 SV=1                      |           | 498.09 |
| P30481                   | 1B44_HUMAN HLA class I histocompatibility antigen, B-44 alpha chain OS=Homo sapiens GN=HLA-B PE=1 SV=1                      |           | 468.99 |
| P30483                   | 1B45_HUMAN HLA class I histocompatibility antigen, B-45 alpha chain OS=Homo sapiens GN=HLA-B PE=2 SV=1                      |           | 433.19 |
| P30484                   | 1B46_HUMAN HLA class I histocompatibility antigen, B-46 alpha chain OS=Homo sapiens GN=HLA-B PE=2 SV=1                      |           | 491.88 |
| P30485                   | 1B47_HUMAN HLA class I histocompatibility antigen, B-47 alpha chain OS=Homo sapiens GN=HLA-B PE=2 SV=1                      |           | 509.17 |
| P30486                   | 1B48_HUMAN HLA class I histocompatibility antigen, B-48 alpha chain OS=Homo sapiens GN=HLA-B PE=1 SV=1                      |           | 389.3  |
| P30487                   | 1B49_HUMAN HLA class I histocompatibility antigen, B-49 alpha chain OS=Homo sapiens GN=HLA-B PE=2 SV=2                      |           | 433.19 |
| P30488                   | 1B50_HUMAN HLA class I histocompatibility antigen, B-50 alpha chain OS=Homo sapiens GN=HLA-B PE=2 SV=1                      |           | 433.19 |
| P30490                   | 1B52_HUMAN HLA class I histocompatibility antigen, B-52 alpha chain OS=Homo sapiens GN=HLA-B PE=2 SV=1                      |           | 439.65 |
| P30491                   | 1B53_HUMAN HLA class I histocompatibility antigen, B-53 alpha chain OS=Homo sapiens GN=HLA-B PE=1 SV=1                      |           | 471.94 |
| P30492                   | 1B54_HUMAN HLA class I histocompatibility antigen, B-54 alpha chain OS=Homo sapiens GN=HLA-B PE=2 SV=1                      |           | 499.59 |
| P30493                   | 1B55_HUMAN HLA class I histocompatibility antigen, B-55 alpha chain OS=Homo sapiens GN=HLA-B PE=1 SV=1                      |           | 499.59 |
| P30495                   | 1B56_HUMAN HLA class I histocompatibility antigen, B-56 alpha chain OS=Homo sapiens GN=HLA-B PE=2 SV=1                      |           | 423.89 |
| P30498                   | 1B78_HUMAN HLA class I histocompatibility antigen, B-78 alpha chain OS=Homo sapiens GN=HLA-B PE=2 SV=1                      |           | 416.04 |
| P30499                   | 1C01_HUMAN HLA class I histocompatibility antigen, Cw-1 alpha chain OS=Homo sapiens GN=HLA-C PE=2 SV=1                      |           | 326.4  |
| P30501                   | 1C02_HUMAN HLA class I histocompatibility antigen, Cw-2 alpha chain OS=Homo sapiens GN=HLA-C PE=1 SV=1                      |           | 358.48 |
| P30504                   | 1C04_HUMAN HLA class I histocompatibility antigen, Cw-4 alpha chain OS=Homo sapiens GN=HLA-C PE=1 SV=1                      |           | 465.81 |
| P30505                   | 1C08_HUMAN HLA class I histocompatibility antigen, Cw-8 alpha chain OS=Homo sapiens GN=HLA-C PE=2 SV=1                      |           | 373.69 |
| P30508                   | 1C12_HUMAN HLA class I histocompatibility antigen, Cw-12 alpha chain OS=Homo sapiens GN=HLA-C PE=1 SV=2                     |           | 562.7  |
| P30510                   | 1C14_HUMAN HLA class I histocompatibility antigen, Cw-14 alpha chain OS=Homo sapiens GN=HLA-C PE=2 SV=2                     |           | 465.81 |
| P30511                   | HIAF_HUMAN HLA class I histocompatibility antigen, alpha chain F OS=Homo sapiens GN=HLA-F PE=2 SV=3                         |           | 71.99  |
| P30511-2                 | HIAF_HUMAN Isoform 2 of HLA class I histocompatibility antigen, alpha chain F OS=Homo sapiens GN=HLA-F                      |           | 58.9   |
| P30511-3                 | HIAF_HUMAN Isoform 3 of HLA class I histocompatibility antigen, alpha chain F OS=Homo sapiens GN=HLA-F                      |           | 71.99  |
| P30511-3;P30511          | 3 HIAF_HUMAN Isoform 3 of HLA class I histocompatibility antigen, alpha chain F OS=Homo sapiens GN=HLA-F;>sp P30511 HIAF_HU | 4.51E-16  |        |
| P30512                   | 1A29_HUMAN HLA class I histocompatibility antigen, A-29 alpha chain OS=Homo sapiens GN=HLA-A PE=2 SV=2                      |           | 595.43 |
| P30519                   | HMOX2_HUMAN Heme oxygenase 2 OS=Homo sapiens GN=HMOX2 PE=1 SV=2                                                             |           | 191.66 |
| P30520                   | PURA2_HUMAN Adenylosuccinate synthetase isozyme 2 OS=Homo sapiens GN=ADSS PE=1 SV=3                                         | 6.95E-86  |        |
| P30530                   | UFO_HUMAN Tyrosine-protein kinase receptor UFO OS=Homo sapiens GN=AXL PE=1 SV=3                                             |           |        |
| P30530-2                 | UFO_HUMAN Isoform Short of Tyrosine-protein kinase receptor UFO OS=Homo sapiens GN=AXL                                      |           |        |
| P30530;P30530-2          | UFO_HUMAN Tyrosine-protein kinase receptor UFO OS=Homo sapiens GN=AXL PE=1 SV=3;>sp P30530-2 UFO_HUMAN Isoform Short        | 2.26E-110 |        |
| P30533                   | AMRP_HUMAN Alpha-2-macroglobulin receptor-associated protein OS=Homo sapiens GN=LRPAP1 PE=1 SV=1                            |           | 153.14 |
| P30536                   | TSPOA_HUMAN Translocator protein OS=Homo sapiens GN=TSPO PE=1 SV=3                                                          |           | 61.31  |
| P30566                   | PUR8_HUMAN Adenylosuccinate lyase OS=Homo sapiens GN=ADSL PE=1 SV=2                                                         |           | 91.48  |
| P30566-2                 | PUR8_HUMAN Isoform 2 of Adenylosuccinate lyase OS=Homo sapiens GN=ADSL                                                      |           | 46.94  |
| P30566;P30566-2          | PUR8_HUMAN Adenylosuccinate lyase OS=Homo sapiens GN=ADSL PE=1 SV=2;>sp P30566-2 PUR8_HUMAN Isoform 2 of Adenylosuc         | 5.83E-149 |        |
| P30613                   | KPYR_HUMAN Pyruvate kinase isozymes R/L OS=Homo sapiens GN=PKLR PE=1 SV=2                                                   |           | 59.25  |
| P30613-2                 | KPYR_HUMAN Isoform L-type of Pyruvate kinase isozymes R/L OS=Homo sapiens GN=PKLR                                           |           | 59.25  |
| P30613;P30613-2          | KPYR_HUMAN Pyruvate kinase isozymes R/L OS=Homo sapiens GN=PKLR PE=1 SV=2;>sp P30613-2 KPYR_HUMAN Isoform L-type of         | 4.65E-09  |        |
| P30622                   | CLIP1_HUMAN CAP-Gly domain-containing linker protein 1 OS=Homo sapiens GN=CLIP1 PE=1 SV=2                                   |           |        |
| P30622-1                 | CLIP1_HUMAN Isoform 2 of CAP-Gly domain-containing linker protein 1 OS=Homo sapiens GN=CLIP1                                |           |        |
| P30622-2                 | CLIP1_HUMAN Isoform 3 of CAP-Gly domain-containing linker protein 1 OS=Homo sapiens GN=CLIP1                                |           |        |
| P30622;P30622-1;P30622-2 | CLIP1_HUMAN CAP-Gly domain-containing linker protein 1 OS=Homo sapiens GN=CLIP1 PE=1 SV=2;>sp P30622-1 CLIP1_HUMAN Iso      | 7.19E-38  |        |
| P30626                   | SORCN_HUMAN Sorcin OS=Homo sapiens GN=SRI PE=1 SV=1                                                                         |           | 127.64 |
| P30685                   | 1B35_HUMAN HLA class I histocompatibility antigen, B-35 alpha chain OS=Homo sapiens GN=HLA-B PE=1 SV=1                      |           | 475.37 |
| P30711                   | GSTT1_HUMAN Glutathione S-transferase theta-1 OS=Homo sapiens GN=GSTT1 PE=1 SV=4                                            | 4.32E-30  |        |
| P30740                   | ILEU_HUMAN Leukocyte elastase inhibitor OS=Homo sapiens GN=SERPINB1 PE=1 SV=1                                               |           | 71.64  |
| P30825                   | CTR1_HUMAN High affinity cationic amino acid transporter 1 OS=Homo sapiens GN=SLC7A1 PE=1 SV=1                              |           | 213.98 |
| P30837                   | AL1B1_HUMAN Aldehyde dehydrogenase X, mitochondrial OS=Homo sapiens GN=ALDH1B1 PE=1 SV=3                                    |           | 206.27 |
| P30876                   | RPB2_HUMAN DNA-directed RNA polymerase II subunit RPB2 OS=Homo sapiens GN=POLR2B PE=1 SV=1                                  |           | 18.79  |
| P31025                   | LCN1_HUMAN Lipocalin-1 OS=Homo sapiens GN=LCN1 PE=1 SV=1                                                                    |           |        |
| P31040                   | DHSA_HUMAN Succinate dehydrogenase [ubiquinone] flavoprotein subunit, mitochondrial OS=Homo sapiens GN=SDHA PE=1 SV=2       |           | 578.12 |
| P31146                   | COR1A_HUMAN Coronin-1A OS=Homo sapiens GN=CORO1A PE=1 SV=4                                                                  |           |        |
| P31150                   | GDIA_HUMAN Rab GDP dissociation inhibitor alpha OS=Homo sapiens GN=GDI1 PE=1 SV=2                                           |           | 317.81 |
| P31151                   | S10A7_HUMAN Protein S100-A7 OS=Homo sapiens GN=S100A7 PE=1 SV=4                                                             |           |        |
| P31152                   | MK04_HUMAN Mitogen-activated protein kinase 4 OS=Homo sapiens GN=MAPK4 PE=1 SV=2                                            |           | 27.93  |
| P31153                   | METK2_HUMAN S-adenosylmethionine synthase isoform type-2 OS=Homo sapiens GN=MAT2A PE=1 SV=1                                 |           | 101.15 |
| P31323                   | KAP3_HUMAN cAMP-dependent protein kinase type II-beta regulatory subunit OS=Homo sapiens GN=PRKAR2B PE=1 SV=3               | 4.07E-17  |        |
| P31327                   | CPSM_HUMAN Carbamoyl-phosphate synthase [ammonia], mitochondrial OS=Homo sapiens GN=CPS1 PE=1 SV=2                          |           | 44.62  |



|                        |                                                                                                                         |            |         |
|------------------------|-------------------------------------------------------------------------------------------------------------------------|------------|---------|
| P31327-2               | CPSM_HUMAN Isoform 2 of Carbamoyl-phosphate synthase [ammonia], mitochondrial OS=Homo sapiens GN=CPS1                   |            | 8.77    |
| P31327;P31327-2        | CPSM_HUMAN Carbamoyl-phosphate synthase [ammonia], mitochondrial OS=Homo sapiens GN=CPS1 PE=1 SV=2;>sp P31327-2 CP      | 0.00019025 |         |
| P31350                 | RIR2_HUMAN Ribonucleoside-diphosphate reductase subunit M2 OS=Homo sapiens GN=RRM2 PE=1 SV=1                            | 3.71E-70   |         |
| P31431                 | SDC4_HUMAN Syndecan-4 OS=Homo sapiens GN=SDC4 PE=1 SV=2                                                                 |            | 26.89   |
| P31483                 | TIA1_HUMAN Nucleolysin TIA-1 isoform p40 OS=Homo sapiens GN=TIA1 PE=1 SV=3                                              |            | 97.03   |
| P31483-2               | TIA1_HUMAN Isoform Short of Nucleolysin TIA-1 isoform p40 OS=Homo sapiens GN=TIA1                                       |            | 97.03   |
| P31483-2;C9JTN7;Q59G9  | 2 TIA1_HUMAN Isoform Short of Nucleolysin TIA-1 isoform p40 OS=Homo sapiens GN=TIA1;>tr C9JTN7 C9JTN7_HUMAN Uncharacter | 7.34E-18   |         |
| P31483;P31483-2        | TIA1_HUMAN Nucleolysin TIA-1 isoform p40 OS=Homo sapiens GN=TIA1 PE=1 SV=3;>sp P31483-2 TIA1_HUMAN Isoform Short of N   | 3.87E-28   |         |
| P31629                 | ZEP2_HUMAN Transcription factor HIVEP2 OS=Homo sapiens GN=HIVEP2 PE=1 SV=2                                              |            |         |
| P31689                 | DNJA1_HUMAN DnaJ homolog subfamily A member 1 OS=Homo sapiens GN=DNAJA1 PE=1 SV=2                                       |            | 96.9    |
| P31749                 | AKT1_HUMAN RAC-alpha serine/threonine-protein kinase OS=Homo sapiens GN=AKT1 PE=1 SV=2                                  | 4.39E-45   |         |
| P31751                 | AKT2_HUMAN RAC-beta serine/threonine-protein kinase OS=Homo sapiens GN=AKT2 PE=1 SV=2                                   | 2.43E-31   |         |
| P31930                 | QCR1_HUMAN Cytochrome b-c1 complex subunit 1, mitochondrial OS=Homo sapiens GN=UQCRC1 PE=1 SV=3                         |            | 269.4   |
| P31937                 | 3HIDH_HUMAN 3-hydroxyisobutyrate dehydrogenase, mitochondrial OS=Homo sapiens GN=HIBADH PE=1 SV=2                       |            | 242.67  |
| P31939                 | PUR9_HUMAN Bifunctional purine biosynthesis protein PURH OS=Homo sapiens GN=ATIC PE=1 SV=3                              |            |         |
| P31941                 | ABC3A_HUMAN Probable DNA dC->dU-editing enzyme APOBEC-3A OS=Homo sapiens GN=APOBEC3A PE=1 SV=3                          |            |         |
| P31942                 | HNRH3_HUMAN Heterogeneous nuclear ribonucleoprotein H3 OS=Homo sapiens GN=HNRNPH3 PE=1 SV=2                             |            | 369.07  |
| P31942-2               | HNRH3_HUMAN Isoform 2 of Heterogeneous nuclear ribonucleoprotein H3 OS=Homo sapiens GN=HNRNPH3                          |            | 369.07  |
| P31942-3               | HNRH3_HUMAN Isoform 3 of Heterogeneous nuclear ribonucleoprotein H3 OS=Homo sapiens GN=HNRNPH3                          |            | 351.89  |
| P31942-4               | HNRH3_HUMAN Isoform 4 of Heterogeneous nuclear ribonucleoprotein H3 OS=Homo sapiens GN=HNRNPH3                          |            | 215.05  |
| P31942-5               | HNRH3_HUMAN Isoform 5 of Heterogeneous nuclear ribonucleoprotein H3 OS=Homo sapiens GN=HNRNPH3                          |            | 171.55  |
| P31942-6               | HNRH3_HUMAN Isoform 6 of Heterogeneous nuclear ribonucleoprotein H3 OS=Homo sapiens GN=HNRNPH3                          |            | 171.55  |
| P31942;P31942-2;P31942 | HNRH3_HUMAN Heterogeneous nuclear ribonucleoprotein H3 OS=Homo sapiens GN=HNRNPH3 PE=1 SV=2;>sp P31942-2 HNRH3_HL       | 1.43E-55   |         |
| P31943                 | HNRH1_HUMAN Heterogeneous nuclear ribonucleoprotein H OS=Homo sapiens GN=HNRNPH1 PE=1 SV=4                              |            | 451.95  |
| P31946                 | 1433B_HUMAN 14-3-3 protein beta/alpha OS=Homo sapiens GN=YWHAB PE=1 SV=3                                                |            | 1433.97 |
| P31946-2               | 1433B_HUMAN Isoform Short of 14-3-3 protein beta/alpha OS=Homo sapiens GN=YWHAB                                         |            | 1455.94 |
| P31947                 | 1433S_HUMAN 14-3-3 protein sigma OS=Homo sapiens GN=SFN PE=1 SV=1                                                       |            | 510.78  |
| P31947-2               | 1433S_HUMAN Isoform 2 of 14-3-3 protein sigma OS=Homo sapiens GN=SFN                                                    |            | 394.32  |
| P31947;P31947-2        | 1433S_HUMAN 14-3-3 protein sigma OS=Homo sapiens GN=SFN PE=1 SV=1;>sp P31947-2 1433S_HUMAN Isoform 2 of 14-3-3 prot     | 4.32E-25   |         |
| P31948                 | STIP1_HUMAN Stress-induced-phosphoprotein 1 OS=Homo sapiens GN=STIP1 PE=1 SV=1                                          |            | 905.88  |
| P31949                 | S10AB_HUMAN Protein S100-A11 OS=Homo sapiens GN=S100A11 PE=1 SV=2                                                       |            | 188.97  |
| P32004                 | L1CAM_HUMAN Neural cell adhesion molecule L1 OS=Homo sapiens GN=L1CAM PE=1 SV=2                                         |            | 113.6   |
| P32004-2               | L1CAM_HUMAN Isoform 2 of Neural cell adhesion molecule L1 OS=Homo sapiens GN=L1CAM                                      |            | 113.6   |
| P32004;P32004-2        | L1CAM_HUMAN Neural cell adhesion molecule L1 OS=Homo sapiens GN=L1CAM PE=1 SV=2;>sp P32004-2 L1CAM_HUMAN Isoform 2      | 5.77E-30   |         |
| P32119                 | PRDX2_HUMAN Peroxiredoxin-2 OS=Homo sapiens GN=PRDX2 PE=1 SV=5                                                          |            | 509.81  |
| P32238                 | CCKAR_HUMAN Cholecystokinin receptor type A OS=Homo sapiens GN=CCKAR PE=1 SV=1                                          |            |         |
| P32247                 | BRS3_HUMAN Bombesin receptor subtype-3 OS=Homo sapiens GN=BRS3 PE=1 SV=1                                                |            |         |
| P32297                 | ACHA3_HUMAN Neuronal acetylcholine receptor subunit alpha-3 OS=Homo sapiens GN=CHRNA3 PE=1 SV=4                         |            |         |
| P32297-1               | ACHA3_HUMAN Isoform 1 of Neuronal acetylcholine receptor subunit alpha-3 OS=Homo sapiens GN=CHRNA3                      |            |         |
| P32297-3               | ACHA3_HUMAN Isoform 3 of Neuronal acetylcholine receptor subunit alpha-3 OS=Homo sapiens GN=CHRNA3                      |            |         |
| P32321                 | DCTD_HUMAN Deoxycytidylate deaminase OS=Homo sapiens GN=DCTD PE=1 SV=2                                                  |            | 44.65   |
| P32321-2               | DCTD_HUMAN Isoform 2 of Deoxycytidylate deaminase OS=Homo sapiens GN=DCTD                                               |            | 44.65   |
| P32321-2;P32321        | 2 DCTD_HUMAN Isoform 2 of Deoxycytidylate deaminase OS=Homo sapiens GN=DCTD;>sp P32321 DCTD_HUMAN Deoxycytidylate d     | 1.51E-07   |         |
| P32322                 | P5CR1_HUMAN Pyrroline-5-carboxylate reductase 1, mitochondrial OS=Homo sapiens GN=PYCR1 PE=1 SV=2                       |            | 736.29  |
| P32418                 | NAC1_HUMAN Sodium/calcium exchanger 1 OS=Homo sapiens GN=SLC8A1 PE=1 SV=3                                               |            | 43.13   |
| P32418-2               | NAC1_HUMAN Isoform 3 of Sodium/calcium exchanger 1 OS=Homo sapiens GN=SLC8A1                                            |            | 43.13   |
| P32418-3               | NAC1_HUMAN Isoform 7 of Sodium/calcium exchanger 1 OS=Homo sapiens GN=SLC8A1                                            |            | 43.13   |
| P32418-4               | NAC1_HUMAN Isoform 10 of Sodium/calcium exchanger 1 OS=Homo sapiens GN=SLC8A1                                           |            | 43.13   |
| P32455                 | GBP1_HUMAN Interferon-induced guanylate-binding protein 1 OS=Homo sapiens GN=GBP1 PE=1 SV=2                             |            | 68.82   |
| P32456                 | GBP2_HUMAN Interferon-induced guanylate-binding protein 2 OS=Homo sapiens GN=GBP2 PE=2 SV=3                             |            |         |
| P32519                 | ELF1_HUMAN ETS-related transcription factor Elf-1 OS=Homo sapiens GN=ELF1 PE=1 SV=2                                     | 9.15E-09   |         |
| P32780                 | TF2H1_HUMAN General transcription factor IIH subunit 1 OS=Homo sapiens GN=GTF2H1 PE=1 SV=1                              |            | 71.23   |
| P32929;B4E1R2;P32929-2 | CGL_HUMAN Cystathionine gamma-lyase OS=Homo sapiens GN=CTH PE=1 SV=3;>tr B4E1R2 B4E1R2_HUMAN cDNA FLJ50357, highl       | 6.59E-20   |         |
| P32969                 | RL9_HUMAN 60S ribosomal protein L9 OS=Homo sapiens GN=RPL9 PE=1 SV=1                                                    |            | 866.94  |
| P32970                 | CD70_HUMAN CD70 antigen OS=Homo sapiens GN=CD70 PE=1 SV=2                                                               | 1.80E-64   |         |
| P33121;P33121-2        | ACSL1_HUMAN Long-chain-fatty-acid--CoA ligase 1 OS=Homo sapiens GN=ACSL1 PE=1 SV=1;>sp P33121-2 ACSL1_HUMAN Isoform     | 3.13E-09   |         |
| P33176                 | KINH_HUMAN Kinesin-1 heavy chain OS=Homo sapiens GN=KIF5B PE=1 SV=1                                                     |            | 69.58   |
| P33240                 | CSTF2_HUMAN Cleavage stimulation factor subunit 2 OS=Homo sapiens GN=CSTF2 PE=1 SV=1                                    |            | 104.03  |
| P33240-2               | CSTF2_HUMAN Isoform 2 of Cleavage stimulation factor subunit 2 OS=Homo sapiens GN=CSTF2                                 |            | 104.03  |
| P33240;P33240-2;Q9H0L4 | CSTF2_HUMAN Cleavage stimulation factor subunit 2 OS=Homo sapiens GN=CSTF2 PE=1 SV=1;>sp P33240-2 CSTF2_HUMAN Isoform   | 1.23E-10   |         |
| P33241                 | LSP1_HUMAN Lymphocyte-specific protein 1 OS=Homo sapiens GN=LSP1 PE=1 SV=1                                              | 1.04E-67   |         |

|                          |                                                                                                                        |            |          |
|--------------------------|------------------------------------------------------------------------------------------------------------------------|------------|----------|
| P33260                   | CP2CI_HUMAN Cytochrome P450 2C18 OS=Homo sapiens GN=CYP2C18 PE=1 SV=3                                                  |            |          |
| P33261                   | CP2CJ_HUMAN Cytochrome P450 2C19 OS=Homo sapiens GN=CYP2C19 PE=1 SV=3                                                  |            |          |
| P33316                   | DUT_HUMAN Deoxyuridine 5'-triphosphate nucleotidohydrolase, mitochondrial OS=Homo sapiens GN=DUT PE=1 SV=3             |            | 306.32   |
| P33316-2                 | DUT_HUMAN Isoform 2 of Deoxyuridine 5'-triphosphate nucleotidohydrolase, mitochondrial OS=Homo sapiens GN=DUT          |            | 306.32   |
| P33316-3                 | DUT_HUMAN Isoform 3 of Deoxyuridine 5'-triphosphate nucleotidohydrolase, mitochondrial OS=Homo sapiens GN=DUT          |            | 306.32   |
| P33316;P33316-2          | DUT_HUMAN Deoxyuridine 5-triphosphate nucleotidohydrolase, mitochondrial OS=Homo sapiens GN=DUT PE=1 SV=4;>sp P33316-2 | 3.09E-36   |          |
| P33527                   | MRP1_HUMAN Multidrug resistance-associated protein 1 OS=Homo sapiens GN=ABCC1 PE=1 SV=3                                |            | 138.03   |
| P33527-2                 | MRP1_HUMAN Isoform 2 of Multidrug resistance-associated protein 1 OS=Homo sapiens GN=ABCC1                             |            | 138.03   |
| P33527-3                 | MRP1_HUMAN Isoform 3 of Multidrug resistance-associated protein 1 OS=Homo sapiens GN=ABCC1                             |            | 138.03   |
| P33527-4                 | MRP1_HUMAN Isoform 4 of Multidrug resistance-associated protein 1 OS=Homo sapiens GN=ABCC1                             |            | 138.03   |
| P33527-5                 | MRP1_HUMAN Isoform 5 of Multidrug resistance-associated protein 1 OS=Homo sapiens GN=ABCC1                             |            | 138.03   |
| P33527-6                 | MRP1_HUMAN Isoform 6 of Multidrug resistance-associated protein 1 OS=Homo sapiens GN=ABCC1                             |            | 138.03   |
| P33527-7                 | MRP1_HUMAN Isoform 7 of Multidrug resistance-associated protein 1 OS=Homo sapiens GN=ABCC1                             |            | 138.03   |
| P33527-8                 | MRP1_HUMAN Isoform 8 of Multidrug resistance-associated protein 1 OS=Homo sapiens GN=ABCC1                             |            | 138.03   |
| P33527-9                 | MRP1_HUMAN Isoform 9 of Multidrug resistance-associated protein 1 OS=Homo sapiens GN=ABCC1                             |            | 138.03   |
| P33527-9;P33527;P33527-9 | MRP1_HUMAN Isoform 9 of Multidrug resistance-associated protein 1 OS=Homo sapiens GN=ABCC1;>sp P33527 MRP1_HUMAN Mu    | 2.58E-12   |          |
| P33552                   | CKS2_HUMAN Cyclin-dependent kinases regulatory subunit 2 OS=Homo sapiens GN=CKS2 PE=1 SV=1                             |            | 69.55    |
| P33764                   | S10A3_HUMAN Protein S100-A3 OS=Homo sapiens GN=S100A3 PE=1 SV=1                                                        |            |          |
| P33778                   | H2B1B_HUMAN Histone H2B type 1-B OS=Homo sapiens GN=HIST1H2BB PE=1 SV=2                                                |            | 729.71   |
| P33897                   | ABCD1_HUMAN ATP-binding cassette sub-family D member 1 OS=Homo sapiens GN=ABCD1 PE=1 SV=2                              | 6.13E-13   |          |
| P33908                   | MA1A1_HUMAN Mannosyl-oligosaccharide 1,2-alpha-mannosidase IA OS=Homo sapiens GN=MAN1A1 PE=1 SV=3                      |            |          |
| P33947                   | ERD22_HUMAN ER lumen protein retaining receptor 2 OS=Homo sapiens GN=KDEL2 PE=1 SV=1                                   |            | 109.75   |
| P33947-2                 | ERD22_HUMAN Isoform 2 of ER lumen protein retaining receptor 2 OS=Homo sapiens GN=KDEL2                                |            | 81.58    |
| P33991                   | MCM4_HUMAN DNA replication licensing factor MCM4 OS=Homo sapiens GN=MCM4 PE=1 SV=5                                     |            | 374.43   |
| P33992                   | MCM5_HUMAN DNA replication licensing factor MCM5 OS=Homo sapiens GN=MCM5 PE=1 SV=5                                     |            | 88.33    |
| P33993                   | MCM7_HUMAN DNA replication licensing factor MCM7 OS=Homo sapiens GN=MCM7 PE=1 SV=4                                     |            | 438      |
| P33993-2                 | MCM7_HUMAN Isoform 2 of DNA replication licensing factor MCM7 OS=Homo sapiens GN=MCM7                                  |            | 198.91   |
| P33993;P33993-2          | MCM7_HUMAN DNA replication licensing factor MCM7 OS=Homo sapiens GN=MCM7 PE=1 SV=4;>sp P33993-2 MCM7_HUMAN Isoform     | 8.09E-100  |          |
| P34096                   | RNAS4_HUMAN Ribonuclease 4 OS=Homo sapiens GN=RNASE4 PE=1 SV=3                                                         | 0.00022164 |          |
| P34896                   | GLYC_HUMAN Serine hydroxymethyltransferase, cytosolic OS=Homo sapiens GN=SHMT1 PE=1 SV=1                               |            |          |
| P34896-2                 | GLYC_HUMAN Isoform 2 of Serine hydroxymethyltransferase, cytosolic OS=Homo sapiens GN=SHMT1                            |            |          |
| P34896-3                 | GLYC_HUMAN Isoform 3 of Serine hydroxymethyltransferase, cytosolic OS=Homo sapiens GN=SHMT1                            |            |          |
| P34896;P34896-2;P34896-3 | GLYC_HUMAN Serine hydroxymethyltransferase, cytosolic OS=Homo sapiens GN=SHMT1 PE=1 SV=1;>sp P34896-2 GLYC_HUMAN Iso   | 4.31E-82   |          |
| P34897                   | GLYM_HUMAN Serine hydroxymethyltransferase, mitochondrial OS=Homo sapiens GN=SHMT2 PE=1 SV=3                           |            | 697.1    |
| P34931                   | HS71L_HUMAN Heat shock 70 kDa protein 1-like OS=Homo sapiens GN=HSPA1L PE=1 SV=2                                       |            | 654.42   |
| P34932                   | HSP74_HUMAN Heat shock 70 kDa protein 4 OS=Homo sapiens GN=HSPA4 PE=1 SV=4                                             |            | 423.75   |
| P34949;P34949-2          | MPI_HUMAN Mannose-6-phosphate isomerase OS=Homo sapiens GN=MPI PE=1 SV=2;>sp P34949-2 MPI_HUMAN Isoform 2 of Mann      | 8.85E-18   |          |
| P35030                   | TRY3_HUMAN Trypsin-3 OS=Homo sapiens GN=PRSS3 PE=1 SV=2                                                                |            | 57.19    |
| P35030-2                 | TRY3_HUMAN Isoform B of Trypsin-3 OS=Homo sapiens GN=PRSS3                                                             |            | 55.93    |
| P35030-3                 | TRY3_HUMAN Isoform C of Trypsin-3 OS=Homo sapiens GN=PRSS3                                                             |            | 55.93    |
| P35030;P35030-2;P35030-3 | TRY3_HUMAN Trypsin-3 OS=Homo sapiens GN=PRSS3 PE=1 SV=2;>sp P35030-2 TRY3_HUMAN Isoform B of Trypsin-3 OS=Homo sa      | 2.32E-59   |          |
| P35052                   | GPC1_HUMAN Glypican-1 OS=Homo sapiens GN=GPC1 PE=1 SV=2                                                                |            | 5.32E-16 |
| P35080                   | PROF2_HUMAN Profilin-2 OS=Homo sapiens GN=PFN2 PE=1 SV=3                                                               |            | 5.46E-63 |
| P35080-2                 | PROF2_HUMAN Isoform IIb of Profilin-2 OS=Homo sapiens GN=PFN2                                                          |            |          |
| P35219                   | CAH8_HUMAN Carbonic anhydrase-related protein OS=Homo sapiens GN=CA8 PE=1 SV=3                                         |            | 5.19E-06 |
| P35221                   | CTNA1_HUMAN Catenin alpha-1 OS=Homo sapiens GN=CTNNA1 PE=1 SV=1                                                        |            | 226.37   |
| P35221-2                 | CTNA1_HUMAN Isoform 2 of Catenin alpha-1 OS=Homo sapiens GN=CTNNA1                                                     |            | 189.16   |
| P35221-2;P35221-2        | CTNA1_HUMAN Isoform 2 of Catenin alpha-1 OS=Homo sapiens GN=CTNNA1;>sp P35221 CTNA1_HUMAN Catenin alpha-1 OS=Hor       | 0          |          |
| P35221;B4E2G8;P35221-2   | CTNA1_HUMAN Catenin alpha-1 OS=Homo sapiens GN=CTNNA1 PE=1 SV=1;>tr B4E2G8 B4E2G8_HUMAN cDNA FLJ54047, highly sin      | 6.17E-224  |          |
| P35222                   | CTNB1_HUMAN Catenin beta-1 OS=Homo sapiens GN=CTNNA1 PE=1 SV=1                                                         |            | 86.14    |
| P35222-2                 | CTNB1_HUMAN Isoform 2 of Catenin beta-1 OS=Homo sapiens GN=CTNNA1                                                      |            |          |
| P35228                   | NOS2_HUMAN Nitric oxide synthase, inducible OS=Homo sapiens GN=NOS2 PE=1 SV=2                                          |            |          |
| P35228-2                 | NOS2_HUMAN Isoform 2 of Nitric oxide synthase, inducible OS=Homo sapiens GN=NOS2                                       |            |          |
| P35228;P35228-2          | NOS2_HUMAN Nitric oxide synthase, inducible OS=Homo sapiens GN=NOS2 PE=1 SV=2;>sp P35228-2 NOS2_HUMAN Isoform 2 of N   | 1.87E-08   |          |
| P35232                   | PHB_HUMAN Prohibitin OS=Homo sapiens GN=PHB PE=1 SV=1                                                                  |            | 807.14   |
| P35237                   | SPB6_HUMAN Serpin B6 OS=Homo sapiens GN=SERPINB6 PE=1 SV=3                                                             |            | 125.77   |
| P35241                   | RADI_HUMAN Radixin OS=Homo sapiens GN=RD3 PE=1 SV=1                                                                    |            | 2170.24  |
| P35244                   | RFA3_HUMAN Replication protein A 14 kDa subunit OS=Homo sapiens GN=RPA3 PE=1 SV=1                                      |            | 549.94   |
| P35249                   | RFC4_HUMAN Replication factor C subunit 4 OS=Homo sapiens GN=RFC4 PE=1 SV=2                                            |            | 62.69    |
| P35250                   | RFC2_HUMAN Replication factor C subunit 2 OS=Homo sapiens GN=RFC2 PE=1 SV=3                                            |            | 183.3    |
| P35250-2                 | RFC2_HUMAN Isoform 2 of Replication factor C subunit 2 OS=Homo sapiens GN=RFC2                                         |            | 183.3    |

|                          |                                                                                                                        |           |         |
|--------------------------|------------------------------------------------------------------------------------------------------------------------|-----------|---------|
| P35250;P35250-2          | RFC2_HUMAN Replication factor C subunit 2 OS=Homo sapiens GN=RFC2 PE=1 SV=3;>sp P35250-2 RFC2_HUMAN Isoform 2 of Repli | 1.85E-11  |         |
| P35251                   | RFC1_HUMAN Replication factor C subunit 1 OS=Homo sapiens GN=RFC1 PE=1 SV=4                                            |           | 150.03  |
| P35251-2                 | RFC1_HUMAN Isoform 2 of Replication factor C subunit 1 OS=Homo sapiens GN=RFC1                                         |           | 150.03  |
| P35251;P35251-2          | RFC1_HUMAN Replication factor C subunit 1 OS=Homo sapiens GN=RFC1 PE=1 SV=4;>sp P35251-2 RFC1_HUMAN Isoform 2 of Repli | 1.32E-43  |         |
| P35268                   | RL22_HUMAN 60S ribosomal protein L22 OS=Homo sapiens GN=RPL22 PE=1 SV=2                                                |           | 455.96  |
| P35269                   | T2FA_HUMAN General transcription factor IIF subunit 1 OS=Homo sapiens GN=GTF2F1 PE=1 SV=2                              |           | 66.52   |
| P35270                   | SPRE_HUMAN Sepiapterin reductase OS=Homo sapiens GN=SPR PE=1 SV=1                                                      |           | 192.31  |
| P35321                   | SPR1A_HUMAN Cornifin-A OS=Homo sapiens GN=SPRR1A PE=1 SV=2                                                             |           |         |
| P35325                   | SPR2B_HUMAN Small proline-rich protein 2B OS=Homo sapiens GN=SPRR2B PE=2 SV=1                                          |           | 23.4    |
| P35326                   | SPR2A_HUMAN Small proline-rich protein 2A OS=Homo sapiens GN=SPRR2A PE=2 SV=1                                          |           | 23.4    |
| P35348                   | ADA1A_HUMAN Alpha-1A adrenergic receptor OS=Homo sapiens GN=ADRA1A PE=2 SV=2                                           |           |         |
| P35348-2                 | ADA1A_HUMAN Isoform 2 of Alpha-1A adrenergic receptor OS=Homo sapiens GN=ADRA1A                                        |           |         |
| P35348-3                 | ADA1A_HUMAN Isoform 3 of Alpha-1A adrenergic receptor OS=Homo sapiens GN=ADRA1A                                        |           |         |
| P35348-4                 | ADA1A_HUMAN Isoform 4 of Alpha-1A adrenergic receptor OS=Homo sapiens GN=ADRA1A                                        |           |         |
| P35348-5                 | ADA1A_HUMAN Isoform 5 of Alpha-1A adrenergic receptor OS=Homo sapiens GN=ADRA1A                                        |           |         |
| P35348-6                 | ADA1A_HUMAN Isoform 6 of Alpha-1A adrenergic receptor OS=Homo sapiens GN=ADRA1A                                        |           |         |
| P35348-7                 | ADA1A_HUMAN Isoform 7 of Alpha-1A adrenergic receptor OS=Homo sapiens GN=ADRA1A                                        |           |         |
| P35348-8                 | ADA1A_HUMAN Isoform 8 of Alpha-1A adrenergic receptor OS=Homo sapiens GN=ADRA1A                                        |           |         |
| P35348-9                 | ADA1A_HUMAN Isoform 9 of Alpha-1A adrenergic receptor OS=Homo sapiens GN=ADRA1A                                        |           |         |
| P35354                   | PGH2_HUMAN Prostaglandin G/H synthase 2 OS=Homo sapiens GN=PTGS2 PE=1 SV=2                                             | 7.19E-08  |         |
| P35410                   | MAS1L_HUMAN Mas-related G-protein coupled receptor MRG OS=Homo sapiens GN=MAS1L PE=2 SV=1                              |           | 24.84   |
| P35442                   | TSP2_HUMAN Thrombospondin-2 OS=Homo sapiens GN=THBS2 PE=1 SV=2                                                         | 0         |         |
| P35498                   | SCN1A_HUMAN Sodium channel protein type 1 subunit alpha OS=Homo sapiens GN=SCN1A PE=1 SV=2                             |           |         |
| P35498-2                 | SCN1A_HUMAN Isoform 2 of Sodium channel protein type 1 subunit alpha OS=Homo sapiens GN=SCN1A                          |           |         |
| P35499                   | SCN4A_HUMAN Sodium channel protein type 4 subunit alpha OS=Homo sapiens GN=SCN4A PE=1 SV=4                             |           |         |
| P35520-2;D3DSK4;P35521   | 2 CBS_HUMAN Isoform 2 of Cystathionine beta-synthase OS=Homo sapiens GN=CBS;>tr D3DSK4 D3DSK4_HUMAN Cystathionine-be   | 4.03E-05  |         |
| P35527                   | K1C9_HUMAN Keratin, type I cytoskeletal 9 OS=Homo sapiens GN=KRT9 PE=1 SV=3                                            |           | 2081.63 |
| P35542                   | SAA4_HUMAN Serum amyloid A-4 protein OS=Homo sapiens GN=SAA4 PE=1 SV=2                                                 | 4.39E-45  |         |
| P35548                   | MSX2_HUMAN Homeobox protein MSX-2 OS=Homo sapiens GN=MSX2 PE=1 SV=3                                                    |           |         |
| P35555                   | FBN1_HUMAN Fibrillin-1 OS=Homo sapiens GN=FBN1 PE=1 SV=3                                                               | 3.31E-201 |         |
| P35573;P35573-3;P35573   | GDE_HUMAN Glycogen debranching enzyme OS=Homo sapiens GN=AGL PE=1 SV=3;>sp P35573-3 GDE_HUMAN Isoform 6 of Glycog      | 0         |         |
| P35579                   | MYH9_HUMAN Myosin-9 OS=Homo sapiens GN=MYH9 PE=1 SV=4                                                                  |           | 7844.73 |
| P35579-2                 | MYH9_HUMAN Isoform 2 of Myosin-9 OS=Homo sapiens GN=MYH9                                                               |           | 5228.19 |
| P35579;P35579-2          | MYH9_HUMAN Myosin-9 OS=Homo sapiens GN=MYH9 PE=1 SV=4;>sp P35579-2 MYH9_HUMAN Isoform 2 of Myosin-9 OS=Homo sap        | 0         |         |
| P35580                   | MYH10_HUMAN Myosin-10 OS=Homo sapiens GN=MYH10 PE=1 SV=3                                                               |           | 1282.66 |
| P35580-2                 | MYH10_HUMAN Isoform 2 of Myosin-10 OS=Homo sapiens GN=MYH10                                                            |           | 1282.66 |
| P35580-3                 | MYH10_HUMAN Isoform 3 of Myosin-10 OS=Homo sapiens GN=MYH10                                                            |           | 1282.66 |
| P35580-3;P35580-2;P35580 | 3 MYH10_HUMAN Isoform 3 of Myosin-10 OS=Homo sapiens GN=MYH10;>sp P35580-2 MYH10_HUMAN Isoform 2 of Myosin-10 OS=I     | 0         |         |
| P35606                   | COPB2_HUMAN Coatomer subunit beta' OS=Homo sapiens GN=COPB2 PE=1 SV=2                                                  |           | 76.92   |
| P35609                   | ACTN2_HUMAN Alpha-actinin-2 OS=Homo sapiens GN=ACTN2 PE=1 SV=1                                                         |           | 916.96  |
| P35610                   | SOAT1_HUMAN Sterol O-acyltransferase 1 OS=Homo sapiens GN=SOAT1 PE=1 SV=3                                              |           | 50.63   |
| P35611                   | ADDA_HUMAN Alpha-adducin OS=Homo sapiens GN=ADD1 PE=1 SV=2                                                             |           | 47.14   |
| P35611-2                 | ADDA_HUMAN Isoform 2 of Alpha-adducin OS=Homo sapiens GN=ADD1                                                          |           | 47.14   |
| P35611-3                 | ADDA_HUMAN Isoform 3 of Alpha-adducin OS=Homo sapiens GN=ADD1                                                          |           | 47.14   |
| P35611-3;P35611;P35611   | 3 ADDA_HUMAN Isoform 3 of Alpha-adducin OS=Homo sapiens GN=ADD1;>sp P35611 ADDA_HUMAN Alpha-adducin OS=Homo sapie      | 1.52E-17  |         |
| P35613                   | BASI_HUMAN Basigin OS=Homo sapiens GN=BSG PE=1 SV=2                                                                    |           | 631.92  |
| P35613-2                 | BASI_HUMAN Isoform 2 of Basigin OS=Homo sapiens GN=BSG                                                                 |           | 631.92  |
| P35613;P35613-2          | BASI_HUMAN Basigin OS=Homo sapiens GN=BSG PE=1 SV=2;>sp P35613-2 BASI_HUMAN Isoform 2 of Basigin OS=Homo sapiens G     | 5.71E-68  |         |
| P35625                   | TIMP3_HUMAN Metalloproteinase inhibitor 3 OS=Homo sapiens GN=TIMP3 PE=1 SV=2                                           |           | 51.53   |
| P35637                   | FUS_HUMAN RNA-binding protein FUS OS=Homo sapiens GN=FUS PE=1 SV=1                                                     |           | 106.82  |
| P35637-2                 | FUS_HUMAN Isoform Short of RNA-binding protein FUS OS=Homo sapiens GN=FUS                                              |           | 106.82  |
| P35637;P35637-2          | FUS_HUMAN RNA-binding protein FUS OS=Homo sapiens GN=FUS PE=1 SV=1;>sp P35637-2 FUS_HUMAN Isoform Short of RNA-binc    | 3.40E-300 |         |
| P35658                   | NU214_HUMAN Nuclear pore complex protein Nup214 OS=Homo sapiens GN=NUP214 PE=1 SV=2                                    |           | 78.13   |
| P35658-2                 | NU214_HUMAN Isoform 2 of Nuclear pore complex protein Nup214 OS=Homo sapiens GN=NUP214                                 |           | 78.13   |
| P35658-3                 | NU214_HUMAN Isoform 3 of Nuclear pore complex protein Nup214 OS=Homo sapiens GN=NUP214                                 |           | 78.13   |
| P35658-3;P35658;P35658   | 3 NU214_HUMAN Isoform 3 of Nuclear pore complex protein Nup214 OS=Homo sapiens GN=NUP214;>sp P35658 NU214_HUMAN Nu     | 5.54E-53  |         |
| P35658-4                 | NU214_HUMAN Isoform 4 of Nuclear pore complex protein Nup214 OS=Homo sapiens GN=NUP214                                 |           | 78.13   |
| P35658-5                 | NU214_HUMAN Isoform 5 of Nuclear pore complex protein Nup214 OS=Homo sapiens GN=NUP214                                 |           | 78.98   |
| P35658-5;P35658-3;P35658 | 5 NU214_HUMAN Isoform 5 of Nuclear pore complex protein Nup214 OS=Homo sapiens GN=NUP214;>sp P35658-3 NU214_HUMAN I    | 9.51E-11  |         |
| P35659                   | DEK_HUMAN Protein DEK OS=Homo sapiens GN=DEK PE=1 SV=1                                                                 |           | 136.33  |
| P35749                   | MYH11_HUMAN Myosin-11 OS=Homo sapiens GN=MYH11 PE=1 SV=3                                                               |           | 994.36  |

|                        |                                                                                                                                            |           |         |
|------------------------|--------------------------------------------------------------------------------------------------------------------------------------------|-----------|---------|
| P35754                 | GLRX1_HUMAN Glutaredoxin-1 OS=Homo sapiens GN=GLRX PE=1 SV=2                                                                               |           | 26.23   |
| P35790;P35790-2        | CHKA_HUMAN Choline kinase alpha OS=Homo sapiens GN=CHKA PE=1 SV=3;>sp P35790-2 CHKA_HUMAN Isoform 2 of Choline kina                        | 6.29E-08  |         |
| P35813;O75688;O75688-  | PPM1A_HUMAN Protein phosphatase 1A OS=Homo sapiens GN=PPM1A PE=1 SV=1;>sp O75688 PPM1B_HUMAN Protein phosphatase                           | 2.58E-09  |         |
| P35858                 | ALS_HUMAN Insulin-like growth factor-binding protein complex acid labile subunit OS=Homo sapiens GN=IGFALS PE=1 SV=1                       |           | 33.5    |
| P35900                 | K1C20_HUMAN Keratin, type I cytoskeletal 20 OS=Homo sapiens GN=KRT20 PE=1 SV=1                                                             |           | 71.33   |
| P35908                 | K22E_HUMAN Keratin, type II cytoskeletal 2 epidermal OS=Homo sapiens GN=KRT2 PE=1 SV=2                                                     |           | 2115.08 |
| P35914                 | HMGCL_HUMAN Hydroxymethylglutaryl-CoA lyase, mitochondrial OS=Homo sapiens GN=HMGCL PE=1 SV=2                                              |           |         |
| P35998                 | PRS7_HUMAN 26S protease regulatory subunit 7 OS=Homo sapiens GN=PSMC2 PE=1 SV=3                                                            |           | 483.35  |
| P36021                 | MOT8_HUMAN Monocarboxylate transporter 8 OS=Homo sapiens GN=SLC16A2 PE=1 SV=2                                                              | 1.73E-15  |         |
| P36222                 | CH3L1_HUMAN Chitinase-3-like protein 1 OS=Homo sapiens GN=CHI3L1 PE=1 SV=2                                                                 | 1.05E-41  |         |
| P36269;P36269-2        | GGT5_HUMAN Gamma-glutamyltransferase 5 OS=Homo sapiens GN=GGT5 PE=1 SV=2;>sp P36269-2 GGT5_HUMAN Isoform 2 of Ga                           | 1.71E-24  |         |
| P36404                 | ARL2_HUMAN ADP-ribosylation factor-like protein 2 OS=Homo sapiens GN=ARL2 PE=1 SV=4                                                        |           | 54.94   |
| P36405                 | ARL3_HUMAN ADP-ribosylation factor-like protein 3 OS=Homo sapiens GN=ARL3 PE=1 SV=2                                                        | 1.98E-19  |         |
| P36406                 | TRI23_HUMAN E3 ubiquitin-protein ligase TRIM23 OS=Homo sapiens GN=TRIM23 PE=1 SV=1                                                         |           | 62.44   |
| P36406-2               | TRI23_HUMAN Isoform Beta of E3 ubiquitin-protein ligase TRIM23 OS=Homo sapiens GN=TRIM23                                                   |           | 62.44   |
| P36406-3               | TRI23_HUMAN Isoform Gamma of E3 ubiquitin-protein ligase TRIM23 OS=Homo sapiens GN=TRIM23                                                  |           | 62.44   |
| P36406;P36406-2;P36406 | TRI23_HUMAN E3 ubiquitin-protein ligase TRIM23 OS=Homo sapiens GN=TRIM23 PE=1 SV=1;>sp P36406-2 TRI23_HUMAN Isoform                        | 2.04E-05  |         |
| P36507                 | MP2K2_HUMAN Dual specificity mitogen-activated protein kinase kinase 2 OS=Homo sapiens GN=MAP2K2 PE=1 SV=1                                 | 1.15E-34  |         |
| P36542                 | ATPG_HUMAN ATP synthase subunit gamma, mitochondrial OS=Homo sapiens GN=ATP5C1 PE=1 SV=1                                                   |           | 257.15  |
| P36542-2               | ATPG_HUMAN Isoform Heart of ATP synthase subunit gamma, mitochondrial OS=Homo sapiens GN=ATP5C1                                            |           | 257.15  |
| P36542;P36542-2        | ATPG_HUMAN ATP synthase subunit gamma, mitochondrial OS=Homo sapiens GN=ATP5C1 PE=1 SV=1;>sp P36542-2 ATPG_HUMAN                           | 3.92E-116 |         |
| P36543                 | VATE1_HUMAN V-type proton ATPase subunit E 1 OS=Homo sapiens GN=ATP6V1E1 PE=1 SV=1                                                         |           | 88.78   |
| P36551                 | HEM6_HUMAN Coproporphyrinogen-III oxidase, mitochondrial OS=Homo sapiens GN=CPOX PE=1 SV=3                                                 |           | 490.66  |
| P36578                 | RL4_HUMAN 60S ribosomal protein L4 OS=Homo sapiens GN=RPL4 PE=1 SV=5                                                                       |           | 1425.93 |
| P36639;P36639-2;P36639 | 8ODP_HUMAN 7,8-dihydro-8-oxoguanine triphosphatase OS=Homo sapiens GN=NUDT1 PE=1 SV=3;>sp P36639-2 8ODP_HUMAN Iso                          | 2.00E-11  |         |
| P36776                 | LONM_HUMAN Lon protease homolog, mitochondrial OS=Homo sapiens GN=LONP1 PE=1 SV=2                                                          |           | 388.39  |
| P36871                 | PGM1_HUMAN Phosphoglucomutase-1 OS=Homo sapiens GN=PGM1 PE=1 SV=3                                                                          |           | 109.93  |
| P36871-2               | PGM1_HUMAN Isoform 2 of Phosphoglucomutase-1 OS=Homo sapiens GN=PGM1                                                                       |           | 80.69   |
| P36871-2;P36871        | 2 PGM1_HUMAN Isoform 2 of Phosphoglucomutase-1 OS=Homo sapiens GN=PGM1;>sp P36871 PGM1_HUMAN Phosphoglucomutase-                           | 3.55E-126 |         |
| P36871;P36871-2        | PGM1_HUMAN Phosphoglucomutase-1 OS=Homo sapiens GN=PGM1 PE=1 SV=3;>sp P36871-2 PGM1_HUMAN Isoform 2 of Phosphog                            | 1.98E-30  |         |
| P36873                 | PP1G_HUMAN Serine/threonine-protein phosphatase PP1-gamma catalytic subunit OS=Homo sapiens GN=PPP1CC PE=1 SV=1                            |           | 811.54  |
| P36873-2               | PP1G_HUMAN Isoform Gamma-2 of Serine/threonine-protein phosphatase PP1-gamma catalytic subunit OS=Homo sapiens GN=PPP1CC                   |           | 814.1   |
| P36873-2;P36873        | 2 PP1G_HUMAN Isoform Gamma-2 of Serine/threonine-protein phosphatase PP1-gamma catalytic subunit OS=Homo sapiens GN=PPP                    | 0         |         |
| P36897-2;P36897;P36897 | 2 TGFR1_HUMAN Isoform 2 of TGF-beta receptor type-1 OS=Homo sapiens GN=TGFBR1;>sp P36897 TGFR1_HUMAN TGF-beta recept                       | 1.01E-13  |         |
| P36915;B4DYK6;Q0EFC6;  | GNL1_HUMAN Guanine nucleotide-binding protein-like 1 OS=Homo sapiens GN=GNL1 PE=1 SV=2;>tr B4DYK6 B4DYK6_HUMAN cDNA                        | 2.57E-11  |         |
| P36952                 | SPB5_HUMAN Serpin B5 OS=Homo sapiens GN=SERPINB5 PE=1 SV=2                                                                                 | 0         |         |
| P36954                 | RPB9_HUMAN DNA-directed RNA polymerase II subunit RPB9 OS=Homo sapiens GN=POLR2I PE=1 SV=1                                                 |           | 18.86   |
| P36955                 | PEDF_HUMAN Pigment epithelium-derived factor OS=Homo sapiens GN=SERPINF1 PE=1 SV=4                                                         | 0         |         |
| P36957                 | ODO2_HUMAN Dihydrolipoyllysine-residue succinyltransferase component of 2-oxoglutarate dehydrogenase complex, mitochondrial OS=Homo sapier |           | 271.8   |
| P36959                 | GMPR1_HUMAN GMP reductase 1 OS=Homo sapiens GN=GMPR PE=1 SV=1                                                                              |           |         |
| P36969                 | GPX4_HUMAN Phospholipid hydroperoxide glutathione peroxidase, mitochondrial OS=Homo sapiens GN=GPX4 PE=1 SV=3                              |           | 60.28   |
| P36969-2               | GPX4_HUMAN Isoform Cytoplasmic of Phospholipid hydroperoxide glutathione peroxidase, mitochondrial OS=Homo sapiens GN=GPX4                 |           | 54.33   |
| P36969;P36969-2        | GPX4_HUMAN Phospholipid hydroperoxide glutathione peroxidase, mitochondrial OS=Homo sapiens GN=GPX4 PE=1 SV=3;>sp P3696                    | 2.51E-22  |         |
| P36980;P36980-2        | FHR2_HUMAN Complement factor H-related protein 2 OS=Homo sapiens GN=CFHR2 PE=1 SV=1;>sp P36980-2 FHR2_HUMAN Isoform                        | 5.83E-32  |         |
| P37108                 | SRP14_HUMAN Signal recognition particle 14 kDa protein OS=Homo sapiens GN=SRP14 PE=1 SV=2                                                  |           | 492.74  |
| P37198                 | NUP62_HUMAN Nuclear pore glycoprotein p62 OS=Homo sapiens GN=NUP62 PE=1 SV=3                                                               |           |         |
| P37235                 | HPCL1_HUMAN Hippocalcin-like protein 1 OS=Homo sapiens GN=HPCAL1 PE=1 SV=3                                                                 |           | 526.8   |
| P37268                 | FDFT_HUMAN Squalene synthase OS=Homo sapiens GN=FDFT1 PE=1 SV=1                                                                            | 3.69E-82  |         |
| P37275                 | ZEB1_HUMAN Zinc finger E-box-binding homeobox 1 OS=Homo sapiens GN=ZEB1 PE=1 SV=2                                                          |           | 59.21   |
| P37802                 | TAGL2_HUMAN Transgelin-2 OS=Homo sapiens GN=TAGLN2 PE=1 SV=3                                                                               |           | 1137.85 |
| P37837                 | TALDO_HUMAN Transaldolase OS=Homo sapiens GN=TALDO1 PE=1 SV=2                                                                              |           | 303.09  |
| P38117                 | ETFB_HUMAN Electron transfer flavoprotein subunit beta OS=Homo sapiens GN=ETFB PE=1 SV=3                                                   |           | 162.55  |
| P38117-2               | ETFB_HUMAN Isoform 2 of Electron transfer flavoprotein subunit beta OS=Homo sapiens GN=ETFB                                                |           | 163.98  |
| P38117-2;P38117        | 2 ETFB_HUMAN Isoform 2 of Electron transfer flavoprotein subunit beta OS=Homo sapiens GN=ETFB;>sp P38117 ETFB_HUMAN Elect                  | 4.92E-55  |         |
| P38117;P38117-2        | ETFB_HUMAN Electron transfer flavoprotein subunit beta OS=Homo sapiens GN=ETFB PE=1 SV=3;>sp P38117-2 ETFB_HUMAN Isofor                    | 3.27E-64  |         |
| P38159                 | HNRPG_HUMAN Heterogeneous nuclear ribonucleoprotein G OS=Homo sapiens GN=RBMX PE=1 SV=3                                                    |           | 332.85  |
| P38405                 | GNAL_HUMAN Guanine nucleotide-binding protein G(olf) subunit alpha OS=Homo sapiens GN=GNAL PE=1 SV=1                                       |           | 117.15  |
| P38432                 | COIL_HUMAN Coilin OS=Homo sapiens GN=COIL PE=1 SV=1                                                                                        |           | 27.51   |
| P38571;P38571-2        | LICH_HUMAN Lysosomal acid lipase/cholesteryl ester hydrolase OS=Homo sapiens GN=LIPA PE=1 SV=2;>sp P38571-2 LICH_HUMAN                     | 7.73E-06  |         |
| P38606                 | VATA_HUMAN V-type proton ATPase catalytic subunit A OS=Homo sapiens GN=ATP6V1A PE=1 SV=2                                                   |           |         |
| P38646                 | GRP75_HUMAN Stress-70 protein, mitochondrial OS=Homo sapiens GN=HSPA9 PE=1 SV=2                                                            |           | 1677.46 |

|                        |                                                                                                                              |           |         |
|------------------------|------------------------------------------------------------------------------------------------------------------------------|-----------|---------|
| P38919                 | IF4A3_HUMAN Eukaryotic initiation factor 4A-III OS=Homo sapiens GN=EIF4A3 PE=1 SV=4                                          |           | 218.06  |
| P39019                 | RS19_HUMAN 40S ribosomal protein S19 OS=Homo sapiens GN=RPS19 PE=1 SV=2                                                      |           | 590.92  |
| P39023                 | RL3_HUMAN 60S ribosomal protein L3 OS=Homo sapiens GN=RPL3 PE=1 SV=2                                                         |           | 1073.93 |
| P39059                 | COFA1_HUMAN Collagen alpha-1(XV) chain OS=Homo sapiens GN=COL15A1 PE=1 SV=2                                                  |           | 25.51   |
| P39060;P39060-1;D3DSM  | COIA1_HUMAN Collagen alpha-1(XVIII) chain OS=Homo sapiens GN=COL18A1 PE=1 SV=5;>sp P39060-1 COIA1_HUMAN Isoform 2 c          | 3.62E-130 |         |
| P39210                 | MPV17_HUMAN Protein Mpv17 OS=Homo sapiens GN=MPV17 PE=1 SV=1                                                                 | 4.75E-08  |         |
| P39656                 | OST48_HUMAN Dolichyl-diphosphooligosaccharide--protein glycosyltransferase 48 kDa subunit OS=Homo sapiens GN=DDOST PE=1 SV=4 |           | 299.02  |
| P39687                 | AN32A_HUMAN Acidic leucine-rich nuclear phosphoprotein 32 family member A OS=Homo sapiens GN=ANP32A PE=1 SV=1                |           | 547.31  |
| P39748                 | FEN1_HUMAN Flap endonuclease 1 OS=Homo sapiens GN=FEN1 PE=1 SV=1                                                             |           | 242.56  |
| P39880                 | CUX1_HUMAN Homeobox protein cut-like 1 OS=Homo sapiens GN=CUX1 PE=1 SV=3                                                     |           | 74.1    |
| P39880-2               | CUX1_HUMAN Isoform 2 of Homeobox protein cut-like 1 OS=Homo sapiens GN=CUX1                                                  |           | 74.1    |
| P39880-3               | CUX1_HUMAN Isoform 3 of Homeobox protein cut-like 1 OS=Homo sapiens GN=CUX1                                                  |           | 67.73   |
| P39880-3;P39880;P39880 | 3 CUX1_HUMAN Isoform 3 of Homeobox protein cut-like 1 OS=Homo sapiens GN=CUX1;>sp P39880 CUX1_HUMAN Homeobox protei          | 5.15E-13  |         |
| P39880-4               | CUX1_HUMAN Isoform 5 of Homeobox protein cut-like 1 OS=Homo sapiens GN=CUX1                                                  |           | 74.1    |
| P39880-5               | CUX1_HUMAN Isoform 6 of Homeobox protein cut-like 1 OS=Homo sapiens GN=CUX1                                                  |           | 74.1    |
| P39880-6               | CUX1_HUMAN Isoform 7 of Homeobox protein cut-like 1 OS=Homo sapiens GN=CUX1                                                  |           | 74.1    |
| P40121                 | CAPG_HUMAN Macrophage-capping protein OS=Homo sapiens GN=CAPG PE=1 SV=2                                                      |           | 324.95  |
| P40123                 | CAP2_HUMAN Adenylyl cyclase-associated protein 2 OS=Homo sapiens GN=CAP2 PE=1 SV=1                                           | 1.58E-43  |         |
| P40199                 | CEAM6_HUMAN Carcinoembryonic antigen-related cell adhesion molecule 6 OS=Homo sapiens GN=CEACAM6 PE=1 SV=3                   | 1.11E-67  |         |
| P40222                 | TXLNA_HUMAN Alpha-taxilin OS=Homo sapiens GN=TXLNA PE=1 SV=3                                                                 |           | 248.95  |
| P40227                 | TCPZ_HUMAN T-complex protein 1 subunit zeta OS=Homo sapiens GN=CCT6A PE=1 SV=3                                               |           | 387.13  |
| P40259                 | CD79B_HUMAN B-cell antigen receptor complex-associated protein beta chain OS=Homo sapiens GN=CD79B PE=1 SV=1                 | 1.95E-54  |         |
| P40261                 | NNMT_HUMAN Nicotinamide N-methyltransferase OS=Homo sapiens GN=NNMT PE=1 SV=1                                                |           | 83.8    |
| P40306                 | PSB10_HUMAN Proteasome subunit beta type-10 OS=Homo sapiens GN=PSMB10 PE=1 SV=1                                              | 1.44E-11  |         |
| P40394                 | ADH7_HUMAN Alcohol dehydrogenase class 4 mu/sigma chain OS=Homo sapiens GN=ADH7 PE=1 SV=2                                    |           | 17.58   |
| P40429                 | RL13A_HUMAN 60S ribosomal protein L13a OS=Homo sapiens GN=RPL13A PE=1 SV=2                                                   |           | 482.22  |
| P40616                 | ARL1_HUMAN ADP-ribosylation factor-like protein 1 OS=Homo sapiens GN=ARL1 PE=1 SV=1                                          |           | 317.64  |
| P40692                 | MLH1_HUMAN DNA mismatch repair protein Mlh1 OS=Homo sapiens GN=MLH1 PE=1 SV=1                                                | 8.00E-09  |         |
| P40763;P40763-2        | STAT3_HUMAN Signal transducer and activator of transcription 3 OS=Homo sapiens GN=STAT3 PE=1 SV=2;>sp P40763-2 STAT3_HUI     | 8.57E-09  |         |
| P40855;P40855-5        | PEX19_HUMAN Peroxisomal biogenesis factor 19 OS=Homo sapiens GN=PEX19 PE=1 SV=1;>sp P40855-5 PEX19_HUMAN Isoform 5 c         | 5.41E-29  |         |
| P40925                 | MDHC_HUMAN Malate dehydrogenase, cytoplasmic OS=Homo sapiens GN=MDH1 PE=1 SV=4                                               |           | 318.16  |
| P40926                 | MDHM_HUMAN Malate dehydrogenase, mitochondrial OS=Homo sapiens GN=MDH2 PE=1 SV=3                                             |           | 1243.89 |
| P40937                 | RFC5_HUMAN Replication factor C subunit 5 OS=Homo sapiens GN=RFC5 PE=1 SV=1                                                  |           | 367.95  |
| P40938                 | RFC3_HUMAN Replication factor C subunit 3 OS=Homo sapiens GN=RFC3 PE=1 SV=2                                                  |           | 192.59  |
| P40939                 | ECHA_HUMAN Trifunctional enzyme subunit alpha, mitochondrial OS=Homo sapiens GN=HADHA PE=1 SV=2                              |           | 822.97  |
| P41091                 | IF2G_HUMAN Eukaryotic translation initiation factor 2 subunit 3 OS=Homo sapiens GN=EIF2S3 PE=1 SV=3                          |           | 756.97  |
| P41161                 | ETV5_HUMAN ETS translocation variant 5 OS=Homo sapiens GN=ETV5 PE=1 SV=1                                                     |           | 31.97   |
| P41180                 | CASR_HUMAN Extracellular calcium-sensing receptor OS=Homo sapiens GN=CASR PE=1 SV=2                                          |           |         |
| P41180-2               | CASR_HUMAN Isoform 2 of Extracellular calcium-sensing receptor OS=Homo sapiens GN=CASR                                       |           |         |
| P41208                 | CETN2_HUMAN Centrin-2 OS=Homo sapiens GN=CETN2 PE=1 SV=1                                                                     |           |         |
| P41212                 | ETV6_HUMAN Transcription factor ETV6 OS=Homo sapiens GN=ETV6 PE=1 SV=1                                                       |           |         |
| P41214                 | EIF2D_HUMAN Eukaryotic translation initiation factor 2D OS=Homo sapiens GN=EIF2D PE=1 SV=3                                   | 5.01E-05  |         |
| P41214;Q5SY38;Q59FU5   | LIGA_HUMAN Ligatin OS=Homo sapiens GN=LGTN PE=1 SV=3;>tr Q5SY38 Q5SY38_HUMAN Ligatin (Fragment) OS=Homo sapiens G            | 5.33E-06  |         |
| P41218                 | MNDA_HUMAN Myeloid cell nuclear differentiation antigen OS=Homo sapiens GN=MNDA PE=1 SV=1                                    | 1.49E-126 |         |
| P41219                 | PERI_HUMAN Peripherin OS=Homo sapiens GN=PRPH PE=1 SV=2                                                                      |           | 350.38  |
| P41219-2               | PERI_HUMAN Isoform 2 of Peripherin OS=Homo sapiens GN=PRPH                                                                   |           | 349.76  |
| P41219-2;P41219        | 2 PERI_HUMAN Isoform 2 of Peripherin OS=Homo sapiens GN=PRPH;>sp P41219 PERI_HUMAN Peripherin OS=Homo sapiens GN=PRI         | 1.85E-170 |         |
| P41223                 | BUD31_HUMAN Protein BUD31 homolog OS=Homo sapiens GN=BUD31 PE=1 SV=2                                                         |           | 78.33   |
| P41226                 | UBA7_HUMAN Ubiquitin-like modifier-activating enzyme 7 OS=Homo sapiens GN=UBA7 PE=1 SV=2                                     | 1.72E-38  |         |
| P41227                 | NAA10_HUMAN N-alpha-acetyltransferase 10, NatA catalytic subunit OS=Homo sapiens GN=NAA10 PE=1 SV=1                          |           | 43.15   |
| P41229                 | KDM5C_HUMAN Lysine-specific demethylase 5C OS=Homo sapiens GN=KDM5C PE=1 SV=2                                                |           | 33.14   |
| P41229-2               | KDM5C_HUMAN Isoform 2 of Lysine-specific demethylase 5C OS=Homo sapiens GN=KDM5C                                             |           | 33.14   |
| P41229-3               | KDM5C_HUMAN Isoform 3 of Lysine-specific demethylase 5C OS=Homo sapiens GN=KDM5C                                             |           | 33.14   |
| P41236;Q6NXS1          | IPP2_HUMAN Protein phosphatase inhibitor 2 OS=Homo sapiens GN=PPP1R2 PE=1 SV=2;>sp Q6NXS1 IPP2M_HUMAN Putative protei        | 1.31E-10  |         |
| P41240                 | CSK_HUMAN Tyrosine-protein kinase CSK OS=Homo sapiens GN=CSK PE=1 SV=1                                                       | 1.05E-88  |         |
| P41247                 | PLPL4_HUMAN Patatin-like phospholipase domain-containing protein 4 OS=Homo sapiens GN=PNPLA4 PE=1 SV=3                       |           |         |
| P41250                 | SYG_HUMAN Glycyl-tRNA synthetase OS=Homo sapiens GN=GARS PE=1 SV=3                                                           |           | 355.95  |
| P41252                 | SYIC_HUMAN Isoleucyl-tRNA synthetase, cytoplasmic OS=Homo sapiens GN=IARS PE=1 SV=2                                          |           | 839.64  |
| P41567                 | EIF1_HUMAN Eukaryotic translation initiation factor 1 OS=Homo sapiens GN=EIF1 PE=1 SV=1                                      |           | 267.62  |
| P41743                 | KPCI_HUMAN Protein kinase C iota type OS=Homo sapiens GN=PRKCI PE=1 SV=2                                                     |           | 16.43   |
| P42025                 | ACTY_HUMAN Beta-actinin OS=Homo sapiens GN=ACTR1B PE=1 SV=1                                                                  |           | 123.68  |



|                        |                                                                                                                           |            |         |
|------------------------|---------------------------------------------------------------------------------------------------------------------------|------------|---------|
| P42126                 | ECI1_HUMAN Enoyl-CoA delta isomerase 1, mitochondrial OS=Homo sapiens GN=ECI1 PE=1 SV=1                                   |            | 199.89  |
| P42126-2               | ECI1_HUMAN Isoform 2 of Enoyl-CoA delta isomerase 1, mitochondrial OS=Homo sapiens GN=ECI1                                |            | 134.26  |
| P42126;P42126-2        | ECI1_HUMAN Enoyl-CoA delta isomerase 1, mitochondrial OS=Homo sapiens GN=ECI1 PE=1 SV=1;>sp P42126-2 ECI1_HUMAN Isofo     | 4.43E-283  |         |
| P42126;P42126-2;Q96DCI | D3D2_HUMAN 3,2-trans-enoyl-CoA isomerase, mitochondrial OS=Homo sapiens GN=DCI PE=1 SV=1;>sp P42126-2 D3D2_HUMAN Is       | 1.65E-89   |         |
| P42166                 | LAP2A_HUMAN Lamina-associated polypeptide 2, isoform alpha OS=Homo sapiens GN=TMPO PE=1 SV=2                              |            | 731.87  |
| P42167                 | LAP2B_HUMAN Lamina-associated polypeptide 2, isoforms beta/gamma OS=Homo sapiens GN=TMPO PE=1 SV=2                        |            | 377.37  |
| P42167-2               | LAP2B_HUMAN Isoform Gamma of Lamina-associated polypeptide 2, isoforms beta/gamma OS=Homo sapiens GN=TMPO                 |            | 377.37  |
| P42167;P42167-2        | LAP2B_HUMAN Lamina-associated polypeptide 2, isoforms beta/gamma OS=Homo sapiens GN=TMPO PE=1 SV=2;>sp P42167-2 LAP;      | 1.07E-271  |         |
| P42224;P42224-2        | STAT1_HUMAN Signal transducer and activator of transcription 1-alpha/beta OS=Homo sapiens GN=STAT1 PE=1 SV=2;>sp P42224-2 | 9.56E-23   |         |
| P42226                 | STAT6_HUMAN Signal transducer and activator of transcription 6 OS=Homo sapiens GN=STAT6 PE=1 SV=1                         | 1.84E-12   |         |
| P42229                 | STA5A_HUMAN Signal transducer and activator of transcription 5A OS=Homo sapiens GN=STAT5A PE=1 SV=1                       | 3.96E-25   |         |
| P42285                 | SK2L2_HUMAN Superkiller viralicidic activity 2-like 2 OS=Homo sapiens GN=SKIV2L2 PE=1 SV=3                                |            | 67.08   |
| P42330;P17516          | AK1C3_HUMAN Aldo-keto reductase family 1 member C3 OS=Homo sapiens GN=AKR1C3 PE=1 SV=4;>sp P17516 AK1C4_HUMAN Alc         | 5.55E-157  |         |
| P42345                 | MTOR_HUMAN Serine/threonine-protein kinase mTOR OS=Homo sapiens GN=MTOR PE=1 SV=1                                         | 1.01E-09   |         |
| P42356                 | PI4KA_HUMAN Phosphatidylinositol 4-kinase alpha OS=Homo sapiens GN=PI4KA PE=1 SV=3                                        |            |         |
| P42356-2               | PI4KA_HUMAN Isoform 2 of Phosphatidylinositol 4-kinase alpha OS=Homo sapiens GN=PI4KA                                     |            |         |
| P42566                 | EPS15_HUMAN Epidermal growth factor receptor substrate 15 OS=Homo sapiens GN=EPS15 PE=1 SV=2                              | 6.04E-42   |         |
| P42574                 | CASP3_HUMAN Caspase-3 OS=Homo sapiens GN=CASP3 PE=1 SV=2                                                                  | 3.40E-70   |         |
| P42677                 | RS27_HUMAN 40S ribosomal protein S27 OS=Homo sapiens GN=RPS27 PE=1 SV=3                                                   |            | 372.36  |
| P42685                 | FRK_HUMAN Tyrosine-protein kinase FRK OS=Homo sapiens GN=FRK PE=1 SV=1                                                    | 3.17E-05   |         |
| P42694                 | HELZ_HUMAN Probable helicase with zinc finger domain OS=Homo sapiens GN=HELZ PE=1 SV=2                                    |            |         |
| P42695                 | CNDD3_HUMAN Condensin-2 complex subunit D3 OS=Homo sapiens GN=NCAPD3 PE=1 SV=2                                            | 2.40E-34   |         |
| P42696                 | RBM34_HUMAN RNA-binding protein 34 OS=Homo sapiens GN=RBM34 PE=1 SV=2                                                     |            | 22.91   |
| P42696-2               | RBM34_HUMAN Isoform 2 of RNA-binding protein 34 OS=Homo sapiens GN=RBM34                                                  |            | 22.91   |
| P42704                 | LPPRC_HUMAN Leucine-rich PPR motif-containing protein, mitochondrial OS=Homo sapiens GN=LPPRC PE=1 SV=3                   |            | 2479.11 |
| P42765                 | THIM_HUMAN 3-ketoacyl-CoA thiolase, mitochondrial OS=Homo sapiens GN=ACAA2 PE=1 SV=2                                      |            |         |
| P42766                 | RL35_HUMAN 60S ribosomal protein L35 OS=Homo sapiens GN=RPL35 PE=1 SV=2                                                   |            | 238.78  |
| P42768                 | WASP_HUMAN Wiskott-Aldrich syndrome protein OS=Homo sapiens GN=WAS PE=1 SV=4                                              | 2.20E-23   |         |
| P42771;P42771-2        | CD2A1_HUMAN Cyclin-dependent kinase inhibitor 2A, isoforms 1/2/3 OS=Homo sapiens GN=CDKN2A PE=1 SV=2;>sp P42771-2 CD2     | 1.66E-14   |         |
| P42785                 | PCP_HUMAN Lysosomal Pro-X carboxypeptidase OS=Homo sapiens GN=PRCP PE=1 SV=1                                              |            |         |
| P42858                 | HD_HUMAN Huntingtin OS=Homo sapiens GN=HTT PE=1 SV=2                                                                      |            |         |
| P42892                 | ECE1_HUMAN Endothelin-converting enzyme 1 OS=Homo sapiens GN=ECE1 PE=1 SV=2                                               |            | 434.96  |
| P42892-2               | ECE1_HUMAN Isoform A of Endothelin-converting enzyme 1 OS=Homo sapiens GN=ECE1                                            |            | 434.96  |
| P42892-3               | ECE1_HUMAN Isoform C of Endothelin-converting enzyme 1 OS=Homo sapiens GN=ECE1                                            |            | 434.96  |
| P42892-4               | ECE1_HUMAN Isoform D of Endothelin-converting enzyme 1 OS=Homo sapiens GN=ECE1                                            |            | 434.96  |
| P42892;P42892-4;P42892 | ECE1_HUMAN Endothelin-converting enzyme 1 OS=Homo sapiens GN=ECE1 PE=1 SV=2;>sp P42892-4 ECE1_HUMAN Isoform D of E        | 1.36E-17   |         |
| P43003                 | EEA1_HUMAN Excitatory amino acid transporter 1 OS=Homo sapiens GN=SLC1A3 PE=1 SV=1                                        | 0.00013158 |         |
| P43007                 | SATT_HUMAN Neutral amino acid transporter A OS=Homo sapiens GN=SLC1A4 PE=1 SV=1                                           |            |         |
| P43026                 | GDF5_HUMAN Growth/differentiation factor 5 OS=Homo sapiens GN=GDF5 PE=1 SV=3                                              |            |         |
| P43034                 | LIS1_HUMAN Platelet-activating factor acetylhydrolase IB subunit alpha OS=Homo sapiens GN=PFAH1B1 PE=1 SV=2               |            | 48.16   |
| P43034-2               | LIS1_HUMAN Isoform 2 of Platelet-activating factor acetylhydrolase IB subunit alpha OS=Homo sapiens GN=PFAH1B1            |            | 5.8     |
| P43121                 | MUC18_HUMAN Cell surface glycoprotein MUC18 OS=Homo sapiens GN=MCAM PE=1 SV=2                                             |            | 134.7   |
| P43121-2               | MUC18_HUMAN Isoform 2 of Cell surface glycoprotein MUC18 OS=Homo sapiens GN=MCAM                                          |            | 44.8    |
| P43121;P43121-2        | MUC18_HUMAN Cell surface glycoprotein MUC18 OS=Homo sapiens GN=MCAM PE=1 SV=2;>sp P43121-2 MUC18_HUMAN Isoform 2          | 1.29E-11   |         |
| P43155                 | CACP_HUMAN Carnitine O-acetyltransferase OS=Homo sapiens GN=CRAT PE=1 SV=5                                                |            | 33.58   |
| P43155-2               | CACP_HUMAN Isoform 2 of Carnitine O-acetyltransferase OS=Homo sapiens GN=CRAT                                             |            | 33.58   |
| P43155-3               | CACP_HUMAN Isoform 3 of Carnitine O-acetyltransferase OS=Homo sapiens GN=CRAT                                             |            | 27.84   |
| P43155;P43155-2;C9JBD1 | CACP_HUMAN Carnitine O-acetyltransferase OS=Homo sapiens GN=CRAT PE=1 SV=5;>sp P43155-2 CACP_HUMAN Isoform 2 of Carn      | 1.09E-81   |         |
| P43243                 | MATR3_HUMAN Matrin-3 OS=Homo sapiens GN=MATR3 PE=1 SV=2                                                                   |            | 555.47  |
| P43246                 | MSH2_HUMAN DNA mismatch repair protein Msh2 OS=Homo sapiens GN=MSH2 PE=1 SV=1                                             |            | 304.41  |
| P43268                 | ETV4_HUMAN ETS translocation variant 4 OS=Homo sapiens GN=ETV4 PE=1 SV=3                                                  |            | 29.69   |
| P43304                 | GPDM_HUMAN Glycerol-3-phosphate dehydrogenase, mitochondrial OS=Homo sapiens GN=GPD2 PE=1 SV=3                            |            | 95      |
| P43304-2               | GPDM_HUMAN Isoform 2 of Glycerol-3-phosphate dehydrogenase, mitochondrial OS=Homo sapiens GN=GPD2                         |            | 91.35   |
| P43304;P43304-2        | GPDM_HUMAN Glycerol-3-phosphate dehydrogenase, mitochondrial OS=Homo sapiens GN=GPD2 PE=1 SV=3;>sp P43304-2 GPDM_H        | 8.84E-40   |         |
| P43307                 | SSRA_HUMAN Translocon-associated protein subunit alpha OS=Homo sapiens GN=SSR1 PE=1 SV=3                                  |            | 154.31  |
| P43307-2               | SSRA_HUMAN Isoform 2 of Translocon-associated protein subunit alpha OS=Homo sapiens GN=SSR1                               |            | 116.46  |
| P43307;P43307-2        | SSRA_HUMAN Translocon-associated protein subunit alpha OS=Homo sapiens GN=SSR1 PE=1 SV=3;>sp P43307-2 SSRA_HUMAN Isc      | 5.12E-56   |         |
| P43378                 | PTN9_HUMAN Tyrosine-protein phosphatase non-receptor type 9 OS=Homo sapiens GN=PTPN9 PE=1 SV=1                            |            |         |
| P43405;P43405-2        | KSYK_HUMAN Tyrosine-protein kinase SYK OS=Homo sapiens GN=SYK PE=1 SV=1;>sp P43405-2 KSYK_HUMAN Isoform Short of Tyr      | 1.14E-142  |         |
| P43487                 | RANG_HUMAN Ran-specific GTPase-activating protein OS=Homo sapiens GN=RANBP1 PE=1 SV=1                                     |            | 164.4   |
| P43490                 | NAMPT_HUMAN Nicotinamide phosphoribosyltransferase OS=Homo sapiens GN=NAMPT PE=1 SV=1                                     |            | 564.06  |



|                         |                                                                                                                            |           |          |
|-------------------------|----------------------------------------------------------------------------------------------------------------------------|-----------|----------|
| P43626                  | KI2L1_HUMAN Killer cell immunoglobulin-like receptor 2DL1 OS=Homo sapiens GN=KIR2DL1 PE=1 SV=1                             |           |          |
| P43627                  | KI2L2_HUMAN Killer cell immunoglobulin-like receptor 2DL2 OS=Homo sapiens GN=KIR2DL2 PE=1 SV=1                             |           |          |
| P43628                  | KI2L3_HUMAN Killer cell immunoglobulin-like receptor 2DL3 OS=Homo sapiens GN=KIR2DL3 PE=1 SV=1                             |           |          |
| P43628-2                | KI2L3_HUMAN Isoform 2 of Killer cell immunoglobulin-like receptor 2DL3 OS=Homo sapiens GN=KIR2DL3                          |           |          |
| P43629                  | KI3L1_HUMAN Killer cell immunoglobulin-like receptor 3DL1 OS=Homo sapiens GN=KIR3DL1 PE=2 SV=1                             |           |          |
| P43631                  | KI2S2_HUMAN Killer cell immunoglobulin-like receptor 2DS2 OS=Homo sapiens GN=KIR2DS2 PE=1 SV=2                             |           |          |
| P43652                  | AFAM_HUMAN Afamin OS=Homo sapiens GN=AFM PE=1 SV=1                                                                         |           | 31.34    |
| P43686                  | PRS6B_HUMAN 26S protease regulatory subunit 6B OS=Homo sapiens GN=PSMC4 PE=1 SV=2                                          |           | 286.19   |
| P43686-2                | PRS6B_HUMAN Isoform 2 of 26S protease regulatory subunit 6B OS=Homo sapiens GN=PSMC4                                       |           | 286.19   |
| P43686;P43686-2         | PRS6B_HUMAN 26S protease regulatory subunit 6B OS=Homo sapiens GN=PSMC4 PE=1 SV=2;>sp P43686-2 PRS6B_HUMAN Isoform         | 1.19E-255 |          |
| P43897                  | EFTS_HUMAN Elongation factor Ts, mitochondrial OS=Homo sapiens GN=TSFM PE=1 SV=2                                           |           |          |
| P43897-2                | EFTS_HUMAN Isoform 2 of Elongation factor Ts, mitochondrial OS=Homo sapiens GN=TSFM                                        |           |          |
| P43897-2;P43897         | 2 EFTS_HUMAN Isoform 2 of Elongation factor Ts, mitochondrial OS=Homo sapiens GN=TSFM;>sp P43897 EFTS_HUMAN Elongation f   | 4.45E-46  |          |
| P45877                  | PPIC_HUMAN Peptidyl-prolyl cis-trans isomerase C OS=Homo sapiens GN=PPIC PE=1 SV=1                                         |           | 49.08    |
| P45880                  | VDAC2_HUMAN Voltage-dependent anion-selective channel protein 2 OS=Homo sapiens GN=VDAC2 PE=1 SV=2                         |           | 586.15   |
| P45880-1                | VDAC2_HUMAN Isoform 1 of Voltage-dependent anion-selective channel protein 2 OS=Homo sapiens GN=VDAC2                      |           | 586.15   |
| P45880-1;P45880;P45880  | 1 VDAC2_HUMAN Isoform 1 of Voltage-dependent anion-selective channel protein 2 OS=Homo sapiens GN=VDAC2;>sp P45880 VDAC    | 7.34E-25  |          |
| P45880-2                | VDAC2_HUMAN Isoform 3 of Voltage-dependent anion-selective channel protein 2 OS=Homo sapiens GN=VDAC2                      |           | 586.15   |
| P45880;P45880-1;P45880  | VDAC2_HUMAN Voltage-dependent anion-selective channel protein 2 OS=Homo sapiens GN=VDAC2 PE=1 SV=2;>sp P45880-1 VDAC       | 0         |          |
| P45954                  | ACDSB_HUMAN Short/branched chain specific acyl-CoA dehydrogenase, mitochondrial OS=Homo sapiens GN=ACADSB PE=1 SV=1        | 7.08E-115 |          |
| P45973                  | CBX5_HUMAN Chromobox protein homolog 5 OS=Homo sapiens GN=CBX5 PE=1 SV=1                                                   |           | 43.49    |
| P45974                  | UBP5_HUMAN Ubiquitin carboxyl-terminal hydrolase 5 OS=Homo sapiens GN=USP5 PE=1 SV=2                                       |           |          |
| P45974-2                | UBP5_HUMAN Isoform Short of Ubiquitin carboxyl-terminal hydrolase 5 OS=Homo sapiens GN=USP5                                |           |          |
| P45974-2;P45974         | 2 UBP5_HUMAN Isoform Short of Ubiquitin carboxyl-terminal hydrolase 5 OS=Homo sapiens GN=USP5;>sp P45974 UBP5_HUMAN Ub     | 0         |          |
| P45974;P45974-2         | UBP5_HUMAN Ubiquitin carboxyl-terminal hydrolase 5 OS=Homo sapiens GN=USP5 PE=1 SV=2;>sp P45974-2 UBP5_HUMAN Isoform       | 2.99E-166 |          |
| P45983                  | MK08_HUMAN Mitogen-activated protein kinase 8 OS=Homo sapiens GN=MAPK8 PE=1 SV=2                                           |           | 41.33    |
| P45983-2                | MK08_HUMAN Isoform 1 of Mitogen-activated protein kinase 8 OS=Homo sapiens GN=MAPK8                                        |           | 41.33    |
| P45983-3                | MK08_HUMAN Isoform 3 of Mitogen-activated protein kinase 8 OS=Homo sapiens GN=MAPK8                                        |           | 41.33    |
| P45983-4                | MK08_HUMAN Isoform 4 of Mitogen-activated protein kinase 8 OS=Homo sapiens GN=MAPK8                                        |           | 41.33    |
| P45984                  | MK09_HUMAN Mitogen-activated protein kinase 9 OS=Homo sapiens GN=MAPK9 PE=1 SV=2                                           |           | 45.31    |
| P45984-2                | MK09_HUMAN Isoform Alpha-1 of Mitogen-activated protein kinase 9 OS=Homo sapiens GN=MAPK9                                  |           | 45.31    |
| P45984-3                | MK09_HUMAN Isoform Beta-1 of Mitogen-activated protein kinase 9 OS=Homo sapiens GN=MAPK9                                   |           | 45.31    |
| P45984-4                | MK09_HUMAN Isoform Beta-2 of Mitogen-activated protein kinase 9 OS=Homo sapiens GN=MAPK9                                   |           | 45.31    |
| P45985-2;D3DTS5;P45985  | 2 MP2K4_HUMAN Isoform 2 of Dual specificity mitogen-activated protein kinase kinase 4 OS=Homo sapiens GN=MAP2K4;>tr D3DTS5 | 1.98E-80  |          |
| P46013                  | KI67_HUMAN Antigen KI-67 OS=Homo sapiens GN=MKI67 PE=1 SV=2                                                                |           | 991.32   |
| P46013-2                | KI67_HUMAN Isoform Short of Antigen KI-67 OS=Homo sapiens GN=MKI67                                                         |           | 944.96   |
| P46013;P46013-2         | KI67_HUMAN Antigen KI-67 OS=Homo sapiens GN=MKI67 PE=1 SV=2;>sp P46013-2 KI67_HUMAN Isoform Short of Antigen KI-67 C       | 6.43E-82  |          |
| P46019                  | KPB2_HUMAN Phosphorylase b kinase regulatory subunit alpha, liver isoform OS=Homo sapiens GN=PHKA2 PE=1 SV=1               |           |          |
| P46020                  | KPB1_HUMAN Phosphorylase b kinase regulatory subunit alpha, skeletal muscle isoform OS=Homo sapiens GN=PHKA1 PE=1 SV=2     |           | 82.15    |
| P46020-2                | KPB1_HUMAN Isoform 2 of Phosphorylase b kinase regulatory subunit alpha, skeletal muscle isoform OS=Homo sapiens GN=PHKA1  |           | 82.15    |
| P46060                  | RAGP1_HUMAN Ran GTPase-activating protein 1 OS=Homo sapiens GN=RANGAP1 PE=1 SV=1                                           |           | 190.58   |
| P46063                  | RECQ1_HUMAN ATP-dependent DNA helicase Q1 OS=Homo sapiens GN=RECQL PE=1 SV=3                                               |           | 42.59    |
| P46087                  | NOP2_HUMAN Putative ribosomal RNA methyltransferase NOP2 OS=Homo sapiens GN=NOP2 PE=1 SV=2                                 |           | 141.64   |
| P46087-2                | NOP2_HUMAN Isoform 2 of Putative ribosomal RNA methyltransferase NOP2 OS=Homo sapiens GN=NOP2                              |           | 141.64   |
| P46087;P46087-2         | NOP2_HUMAN Putative ribosomal RNA methyltransferase NOP2 OS=Homo sapiens GN=NOP2 PE=1 SV=2;>sp P46087-2 NOP2_HUMA          | 5.65E-219 |          |
| P46100                  | ATRX_HUMAN Transcriptional regulator ATRX OS=Homo sapiens GN=ATRX PE=1 SV=5                                                |           |          |
| P46100-2                | ATRX_HUMAN Isoform 1 of Transcriptional regulator ATRX OS=Homo sapiens GN=ATRX                                             |           |          |
| P46100-3                | ATRX_HUMAN Isoform 2 of Transcriptional regulator ATRX OS=Homo sapiens GN=ATRX                                             |           |          |
| P46100-4                | ATRX_HUMAN Isoform 3 of Transcriptional regulator ATRX OS=Homo sapiens GN=ATRX                                             |           |          |
| P46100-5                | ATRX_HUMAN Isoform 5 of Transcriptional regulator ATRX OS=Homo sapiens GN=ATRX                                             |           |          |
| P46100-6                | ATRX_HUMAN Isoform 6 of Transcriptional regulator ATRX OS=Homo sapiens GN=ATRX                                             |           |          |
| P46100;P46100-4;P46100  | ATRX_HUMAN Transcriptional regulator ATRX OS=Homo sapiens GN=ATRX PE=1 SV=5;>sp P46100-4 ATRX_HUMAN Isoform 3 of Tran      | 4.70E-10  |          |
| P46108                  | CRK_HUMAN Adapter molecule crk OS=Homo sapiens GN=CRK PE=1 SV=2                                                            |           | 42.77    |
| P46108-2                | CRK_HUMAN Isoform Crk-I of Adapter molecule crk OS=Homo sapiens GN=CRK                                                     |           | 42.77    |
| P46108;P46108-2         | CRK_HUMAN Adapter molecule crk OS=Homo sapiens GN=CRK PE=1 SV=2;>sp P46108-2 CRK_HUMAN Isoform Crk-I of Adapter mol        | 2.26E-44  |          |
| P46109                  | CRKL_HUMAN Crk-like protein OS=Homo sapiens GN=CRKL PE=1 SV=1                                                              |           | 8.77E-31 |
| P46199                  | IF2M_HUMAN Translation initiation factor IF-2, mitochondrial OS=Homo sapiens GN=MTIF2 PE=1 SV=2                            |           | 8.45E-15 |
| P46379                  | BAG6_HUMAN Large proline-rich protein BAG6 OS=Homo sapiens GN=BAG6 PE=1 SV=2                                               |           | 191.67   |
| P46379-2                | BAG6_HUMAN Isoform 2 of Large proline-rich protein BAG6 OS=Homo sapiens GN=BAG6                                            |           | 191.67   |
| P46379-3                | BAG6_HUMAN Isoform 3 of Large proline-rich protein BAG6 OS=Homo sapiens GN=BAG6                                            |           | 191.67   |
| P46379-3;P46379;B0UX8:3 | BAT3_HUMAN Isoform 3 of Large proline-rich protein BAT3 OS=Homo sapiens GN=BAT3;>sp P46379 BAT3_HUMAN Large proline-ri     | 2.98E-22  |          |

|                                                                                                                                                   |           |         |
|---------------------------------------------------------------------------------------------------------------------------------------------------|-----------|---------|
| P46379-3;P46379;P46379 3 BAG6_HUMAN Isoform 3 of Large proline-rich protein BAG6 OS=Homo sapiens GN=BAG6;>sp P46379 BAG6_HUMAN Large proline-     | 2.86E-28  |         |
| P46459 NSF_HUMAN Vesicle-fusing ATPase OS=Homo sapiens GN=NSF PE=1 SV=3                                                                           |           | 52.77   |
| P46531 NOTC1_HUMAN Neurogenic locus notch homolog protein 1 OS=Homo sapiens GN=NOTCH1 PE=1 SV=4                                                   |           | 7.52    |
| P46734-3;C9JI18;P46734;3 MP2K3_HUMAN Isoform 2 of Dual specificity mitogen-activated protein kinase kinase 3 OS=Homo sapiens GN=MAP2K3;>tr C9JI18 | 2.23E-35  |         |
| P46736;P46736-3;P46736 BRCC3_HUMAN Lys-63-specific deubiquitinase BRCC36 OS=Homo sapiens GN=BRCC3 PE=1 SV=2;>sp P46736-3 BRCC3_HUMAN Isof         | 2.15E-05  |         |
| P46776 RL27A_HUMAN 60S ribosomal protein L27a OS=Homo sapiens GN=RPL27A PE=1 SV=2                                                                 |           | 270.78  |
| P46777 RL5_HUMAN 60S ribosomal protein L5 OS=Homo sapiens GN=RPL5 PE=1 SV=3                                                                       |           | 1740.68 |
| P46778 RL21_HUMAN 60S ribosomal protein L21 OS=Homo sapiens GN=RPL21 PE=1 SV=2                                                                    |           | 671.68  |
| P46779 RL28_HUMAN 60S ribosomal protein L28 OS=Homo sapiens GN=RPL28 PE=1 SV=3                                                                    |           | 403.57  |
| P46781 RS9_HUMAN 40S ribosomal protein S9 OS=Homo sapiens GN=RPS9 PE=1 SV=3                                                                       |           | 840.85  |
| P46782 RS5_HUMAN 40S ribosomal protein S5 OS=Homo sapiens GN=RPS5 PE=1 SV=4                                                                       |           | 808.8   |
| P46783 RS10_HUMAN 40S ribosomal protein S10 OS=Homo sapiens GN=RPS10 PE=1 SV=1                                                                    |           | 519.22  |
| P46821 MAP1B_HUMAN Microtubule-associated protein 1B OS=Homo sapiens GN=MAP1B PE=1 SV=2                                                           |           | 1615.97 |
| P46926 GNPI1_HUMAN Glucosamine-6-phosphate isomerase 1 OS=Homo sapiens GN=GNPDA1 PE=1 SV=1                                                        | 8.11E-22  |         |
| P46934-4;P46934;P46934 4 NEDD4_HUMAN Isoform 4 of E3 ubiquitin-protein ligase NEDD4 OS=Homo sapiens GN=NEDD4;>sp P46934 NEDD4_HUMAN E3 ubic       | 2.58E-98  |         |
| P46937 YAP1_HUMAN Yorkie homolog OS=Homo sapiens GN=YAP1 PE=1 SV=2                                                                                |           | 68.37   |
| P46937-2 YAP1_HUMAN Isoform 2 of Yorkie homolog OS=Homo sapiens GN=YAP1                                                                           |           | 68.37   |
| P46937-3 YAP1_HUMAN Isoform 3 of Yorkie homolog OS=Homo sapiens GN=YAP1                                                                           |           | 68.37   |
| P46937;P46937-2;P46937 YAP1_HUMAN Yorkie homolog OS=Homo sapiens GN=YAP1 PE=1 SV=2;>sp P46937-2 YAP1_HUMAN Isoform 2 of Yorkie homolog OS-        | 1.18E-11  |         |
| P46939 UTRO_HUMAN Utrophin OS=Homo sapiens GN=UTRN PE=1 SV=2                                                                                      |           | 1475.41 |
| P46940 IQGA1_HUMAN Ras GTPase-activating-like protein IQGAP1 OS=Homo sapiens GN=IQGAP1 PE=1 SV=1                                                  |           | 3781.81 |
| P46976;P46976-2;P46976 GLYG_HUMAN Glycogenin-1 OS=Homo sapiens GN=GYG1 PE=1 SV=4;>sp P46976-2 GLYG_HUMAN Isoform GN-1 of Glycogenin-1 OS          | 9.26E-11  |         |
| P46977 STT3A_HUMAN Dolichyl-diphosphooligosaccharide--protein glycosyltransferase subunit STT3A OS=Homo sapiens GN=STT3A PE=1 SV=2                |           | 269.77  |
| P47224 MSS4_HUMAN Guanine nucleotide exchange factor MSS4 OS=Homo sapiens GN=RABIF PE=1 SV=2                                                      | 4.49E-13  |         |
| P47736 RPGP1_HUMAN Rap1 GTPase-activating protein 1 OS=Homo sapiens GN=RAP1GAP PE=1 SV=2                                                          |           | 29.08   |
| P47736-2 RPGP1_HUMAN Isoform 2 of Rap1 GTPase-activating protein 1 OS=Homo sapiens GN=RAP1GAP                                                     |           | 29.08   |
| P47736-3 RPGP1_HUMAN Isoform 3 of Rap1 GTPase-activating protein 1 OS=Homo sapiens GN=RAP1GAP                                                     |           | 28.94   |
| P47755 CAZA2_HUMAN F-actin-capping protein subunit alpha-2 OS=Homo sapiens GN=CAPZA2 PE=1 SV=3                                                    |           | 146.35  |
| P47756 CAPZB_HUMAN F-actin-capping protein subunit beta OS=Homo sapiens GN=CAPZB PE=1 SV=4                                                        |           | 529.11  |
| P47756-2 CAPZB_HUMAN Isoform 2 of F-actin-capping protein subunit beta OS=Homo sapiens GN=CAPZB                                                   |           | 625.99  |
| P47756-2;P47756 2 CAPZB_HUMAN Isoform 2 of F-actin-capping protein subunit beta OS=Homo sapiens GN=CAPZB;>sp P47756 CAPZB_HUMAN F-acti            | 6.35E-68  |         |
| P47756;P47756-2 CAPZB_HUMAN F-actin-capping protein subunit beta OS=Homo sapiens GN=CAPZB PE=1 SV=4;>sp P47756-2 CAPZB_HUMAN Isoforr              | 2.03E-63  |         |
| P47813 EIF1AX_HUMAN Eukaryotic translation initiation factor 1A, X-chromosomal OS=Homo sapiens GN=EIF1AX PE=1 SV=2                                |           | 180.66  |
| P47895 AL1A3_HUMAN Aldehyde dehydrogenase family 1 member A3 OS=Homo sapiens GN=ALDH1A3 PE=1 SV=2                                                 |           | 20.89   |
| P47897 SYQ_HUMAN Glutamyl-tRNA synthetase OS=Homo sapiens GN=QARS PE=1 SV=1                                                                       |           | 645.34  |
| P47898 5HT5A_HUMAN 5-hydroxytryptamine receptor 5A OS=Homo sapiens GN=HTR5A PE=1 SV=1                                                             |           |         |
| P47914 RL29_HUMAN 60S ribosomal protein L29 OS=Homo sapiens GN=RPL29 PE=1 SV=2                                                                    |           | 132.01  |
| P47929 LEG7_HUMAN Galectin-7 OS=Homo sapiens GN=LGALS7 PE=1 SV=2                                                                                  |           |         |
| P47985 UCRI_HUMAN Cytochrome b-c1 complex subunit Rieske, mitochondrial OS=Homo sapiens GN=UQCRFS1 PE=1 SV=2                                      |           | 361.62  |
| P47989 XDH_HUMAN Xanthine dehydrogenase/oxidase OS=Homo sapiens GN=XDH PE=1 SV=4                                                                  | 1.21E-08  |         |
| P48047 ATPO_HUMAN ATP synthase subunit O, mitochondrial OS=Homo sapiens GN=ATP5O PE=1 SV=1                                                        |           | 654.16  |
| P48058 GRIA4_HUMAN Glutamate receptor 4 OS=Homo sapiens GN=GRIA4 PE=2 SV=2                                                                        |           |         |
| P48059 LIMS1_HUMAN LIM and senescent cell antigen-like-containing domain protein 1 OS=Homo sapiens GN=LIMS1 PE=1 SV=4                             |           | 189.42  |
| P48060 GLIP1_HUMAN Glioma pathogenesis-related protein 1 OS=Homo sapiens GN=GLIPR1 PE=1 SV=3                                                      |           | 39.69   |
| P48147 PPCE_HUMAN Prolyl endopeptidase OS=Homo sapiens GN=PREP PE=1 SV=2                                                                          | 6.81E-08  |         |
| P48163 MAOX_HUMAN NADP-dependent malic enzyme OS=Homo sapiens GN=ME1 PE=1 SV=1                                                                    | 6.43E-13  |         |
| P48426 PI42A_HUMAN Phosphatidylinositol-5-phosphate 4-kinase type-2 alpha OS=Homo sapiens GN=PIP4K2A PE=1 SV=2                                    | 8.70E-23  |         |
| P48443 RXRG_HUMAN Retinoic acid receptor RXR-gamma OS=Homo sapiens GN=RXRG PE=1 SV=1                                                              |           |         |
| P48444 COPD_HUMAN Coatomer subunit delta OS=Homo sapiens GN=ARCN1 PE=1 SV=1                                                                       |           | 492.34  |
| P48449 ERG7_HUMAN Lanosterol synthase OS=Homo sapiens GN=LSS PE=1 SV=1                                                                            |           | 223.8   |
| P48454 PP2BC_HUMAN Serine/threonine-protein phosphatase 2B catalytic subunit gamma isoform OS=Homo sapiens GN=PPP3CC PE=1 SV=3                    |           |         |
| P48454-2 PP2BC_HUMAN Isoform 2 of Serine/threonine-protein phosphatase 2B catalytic subunit gamma isoform OS=Homo sapiens GN=PPP3CC               |           |         |
| P48507 GSHO_HUMAN Glutamate--cysteine ligase regulatory subunit OS=Homo sapiens GN=GCLM PE=1 SV=1                                                 | 0.0001736 |         |
| P48509 CD151_HUMAN CD151 antigen OS=Homo sapiens GN=CD151 PE=1 SV=3                                                                               |           | 124.2   |
| P48552 NRIP1_HUMAN Nuclear receptor-interacting protein 1 OS=Homo sapiens GN=NRIP1 PE=1 SV=2                                                      |           |         |
| P48556 PSMD8_HUMAN 26S proteasome non-ATPase regulatory subunit 8 OS=Homo sapiens GN=PSMD8 PE=1 SV=2                                              |           | 242.53  |
| P48594 SPB4_HUMAN Serpin B4 OS=Homo sapiens GN=SERPINB4 PE=1 SV=2                                                                                 |           |         |
| P48595 SPB10_HUMAN Serpin B10 OS=Homo sapiens GN=SERPINB10 PE=1 SV=1                                                                              | 4.38E-25  |         |
| P48634 PRC2A_HUMAN Protein PRRC2A OS=Homo sapiens GN=PRRC2A PE=1 SV=3                                                                             |           | 519.89  |
| P48634-2 PRC2A_HUMAN Isoform 2 of Protein PRRC2A OS=Homo sapiens GN=PRRC2A                                                                        |           | 462.28  |
| P48634-3 PRC2A_HUMAN Isoform 3 of Protein PRRC2A OS=Homo sapiens GN=PRRC2A                                                                        |           | 496.01  |

|                        |                                                                                                                             |           |         |
|------------------------|-----------------------------------------------------------------------------------------------------------------------------|-----------|---------|
| P48634-4               | PRC2A_HUMAN Isoform 4 of Protein PRRC2A OS=Homo sapiens GN=PRRC2A                                                           |           | 369.16  |
| P48634;P48634-3;P48634 | PRC2A_HUMAN Protein PRRC2A OS=Homo sapiens GN=PRRC2A PE=1 SV=3;>sp P48634-3 PRC2A_HUMAN Isoform 3 of Protein PRRC           | 8.33E-22  |         |
| P48637                 | GSHB_HUMAN Glutathione synthetase OS=Homo sapiens GN=GSS PE=1 SV=1                                                          |           | 40.33   |
| P48643                 | TCPE_HUMAN T-complex protein 1 subunit epsilon OS=Homo sapiens GN=CCT5 PE=1 SV=1                                            |           | 550.62  |
| P48651                 | PTSS1_HUMAN Phosphatidylserine synthase 1 OS=Homo sapiens GN=PTDSS1 PE=1 SV=1                                               |           | 103.86  |
| P48664                 | EAA4_HUMAN Excitatory amino acid transporter 4 OS=Homo sapiens GN=SLC1A6 PE=2 SV=1                                          |           | 40.4    |
| P48668                 | K2C6C_HUMAN Keratin, type II cytoskeletal 6C OS=Homo sapiens GN=KRT6C PE=1 SV=3                                             |           | 1061.4  |
| P48681                 | NEST_HUMAN Nestin OS=Homo sapiens GN=NES PE=1 SV=2                                                                          | 2.17E-38  |         |
| P48729                 | KC1A_HUMAN Casein kinase I isoform alpha OS=Homo sapiens GN=CSNK1A1 PE=1 SV=2                                               |           | 65.77   |
| P48729-2               | KC1A_HUMAN Isoform 2 of Casein kinase I isoform alpha OS=Homo sapiens GN=CSNK1A1                                            |           | 65.77   |
| P48729-2;P48729        | 2 KC1A_HUMAN Isoform 2 of Casein kinase I isoform alpha OS=Homo sapiens GN=CSNK1A1;>sp P48729 KC1A_HUMAN Casein kinas       | 7.35E-41  |         |
| P48735                 | IDHP_HUMAN Isocitrate dehydrogenase [NADP], mitochondrial OS=Homo sapiens GN=IDH2 PE=1 SV=2                                 |           |         |
| P48739-2;P48739        | 2 PIPNB_HUMAN Isoform 2 of Phosphatidylinositol transfer protein beta isoform OS=Homo sapiens GN=PITPNB;>sp P48739 PIPNB_H  | 9.72E-62  |         |
| P48741                 | HSP77_HUMAN Putative heat shock 70 kDa protein 7 OS=Homo sapiens GN=HSPA7 PE=5 SV=2                                         |           | 267.36  |
| P48960                 | CD97_HUMAN CD97 antigen OS=Homo sapiens GN=CD97 PE=1 SV=4                                                                   |           | 1002.34 |
| P48960-2               | CD97_HUMAN Isoform 2 of CD97 antigen OS=Homo sapiens GN=CD97                                                                |           | 1002.34 |
| P48960-3               | CD97_HUMAN Isoform 3 of CD97 antigen OS=Homo sapiens GN=CD97                                                                |           | 1002.34 |
| P48960;P48960-3;B4DTS  | CD97_HUMAN CD97 antigen OS=Homo sapiens GN=CD97 PE=1 SV=4;>sp P48960-3 CD97_HUMAN Isoform 3 of CD97 antigen OS=H            | 7.45E-249 |         |
| P48995                 | TRPC1_HUMAN Short transient receptor potential channel 1 OS=Homo sapiens GN=TRPC1 PE=1 SV=1                                 |           |         |
| P48995-2               | TRPC1_HUMAN Isoform Short of Short transient receptor potential channel 1 OS=Homo sapiens GN=TRPC1                          |           |         |
| P49005                 | DPOD2_HUMAN DNA polymerase delta subunit 2 OS=Homo sapiens GN=POLD2 PE=1 SV=1                                               | 4.83E-07  |         |
| P49006                 | MRP_HUMAN MARCKS-related protein OS=Homo sapiens GN=MARCKSL1 PE=1 SV=2                                                      |           | 107.17  |
| P49023-3;B7ZMB4;P4902  | 3 PAXI_HUMAN Isoform Gamma of Paxillin OS=Homo sapiens GN=PXN;>tr B7ZMB4 B7ZMB4_HUMAN Paxillin OS=Homo sapiens GN=          | 6.55E-230 |         |
| P49137                 | MAPK2_HUMAN MAP kinase-activated protein kinase 2 OS=Homo sapiens GN=MAPKAPK2 PE=1 SV=1                                     | 4.92E-13  |         |
| P49189                 | AL9A1_HUMAN 4-trimethylaminobutyraldehyde dehydrogenase OS=Homo sapiens GN=ALDH9A1 PE=1 SV=3                                |           | 87.15   |
| P49190                 | PTH2R_HUMAN Parathyroid hormone 2 receptor OS=Homo sapiens GN=PTH2R PE=1 SV=1                                               |           |         |
| P49207                 | RL34_HUMAN 60S ribosomal protein L34 OS=Homo sapiens GN=RPL34 PE=1 SV=3                                                     |           | 246.96  |
| P49221                 | TGM4_HUMAN Protein-glutamine gamma-glutamyltransferase 4 OS=Homo sapiens GN=TGM4 PE=1 SV=2                                  | 1.16E-11  |         |
| P49247                 | RPIA_HUMAN Ribose-5-phosphate isomerase OS=Homo sapiens GN=RPIA PE=1 SV=3                                                   | 9.95E-21  |         |
| P49257                 | LMAN1_HUMAN Protein ERGIC-53 OS=Homo sapiens GN=LMAN1 PE=1 SV=2                                                             |           | 126.61  |
| P49321                 | NASP_HUMAN Nuclear autoantigenic sperm protein OS=Homo sapiens GN=NASP PE=1 SV=2                                            |           | 456.23  |
| P49321-2               | NASP_HUMAN Isoform 2 of Nuclear autoantigenic sperm protein OS=Homo sapiens GN=NASP                                         |           | 279.93  |
| P49321-3               | NASP_HUMAN Isoform 3 of Nuclear autoantigenic sperm protein OS=Homo sapiens GN=NASP                                         |           | 456.23  |
| P49321-3;D3DQ07;P4932  | 3 NASP_HUMAN Isoform 3 of Nuclear autoantigenic sperm protein OS=Homo sapiens GN=NASP;>tr D3DQ07 D3DQ07_HUMAN Nuclea        | 9.91E-257 |         |
| P49327                 | FAS_HUMAN Fatty acid synthase OS=Homo sapiens GN=FASN PE=1 SV=3                                                             |           | 682.94  |
| P49354;P49354-2        | FNTA_HUMAN Protein farnesyltransferase/geranylgeranyltransferase type-1 subunit alpha OS=Homo sapiens GN=FNTA PE=1 SV=1;>sp | 4.81E-18  |         |
| P49366;P49366-2        | DHYS_HUMAN Deoxyhypusine synthase OS=Homo sapiens GN=DHPS PE=1 SV=1;>sp P49366-2 DHYS_HUMAN Isoform Short of Deo            | 1.94E-21  |         |
| P49368                 | TCPG_HUMAN T-complex protein 1 subunit gamma OS=Homo sapiens GN=CCT3 PE=1 SV=4                                              |           | 755.89  |
| P49406                 | RM19_HUMAN 39S ribosomal protein L19, mitochondrial OS=Homo sapiens GN=MRPL19 PE=1 SV=2                                     |           | 105.17  |
| P49407;P49407-2        | ARRB1_HUMAN Beta-arrestin-1 OS=Homo sapiens GN=ARRB1 PE=1 SV=2;>sp P49407-2 ARRB1_HUMAN Isoform 1B of Beta-arrestin         | 1.74E-09  |         |
| P49411                 | EFTU_HUMAN Elongation factor Tu, mitochondrial OS=Homo sapiens GN=TUFM PE=1 SV=2                                            |           | 744.25  |
| P49419                 | AL7A1_HUMAN Alpha-aminoadipic semialdehyde dehydrogenase OS=Homo sapiens GN=ALDH7A1 PE=1 SV=5                               |           | 34.24   |
| P49419-2               | AL7A1_HUMAN Isoform 2 of Alpha-aminoadipic semialdehyde dehydrogenase OS=Homo sapiens GN=ALDH7A1                            |           | 34.24   |
| P49419-3               | AL7A1_HUMAN Isoform 3 of Alpha-aminoadipic semialdehyde dehydrogenase OS=Homo sapiens GN=ALDH7A1                            |           | 34.24   |
| P49419;P49419-2        | AL7A1_HUMAN Alpha-aminoadipic semialdehyde dehydrogenase OS=Homo sapiens GN=ALDH7A1 PE=1 SV=5;>sp P49419-2 AL7A1_           | 2.47E-130 |         |
| P49441                 | INPP_HUMAN Inositol polyphosphate 1-phosphatase OS=Homo sapiens GN=INPP1 PE=1 SV=1                                          | 2.14E-06  |         |
| P49447                 | CY561_HUMAN Cytochrome b561 OS=Homo sapiens GN=CYB561 PE=2 SV=2                                                             | 8.21E-10  |         |
| P49448                 | DHE4_HUMAN Glutamate dehydrogenase 2, mitochondrial OS=Homo sapiens GN=GLUD2 PE=1 SV=2                                      |           | 608.66  |
| P49454                 | CENPF_HUMAN Centromere protein F OS=Homo sapiens GN=CENPF PE=1 SV=2                                                         |           |         |
| P49458                 | SRP09_HUMAN Signal recognition particle 9 kDa protein OS=Homo sapiens GN=SRP9 PE=1 SV=2                                     |           | 252.18  |
| P49458-2               | SRP09_HUMAN Isoform 2 of Signal recognition particle 9 kDa protein OS=Homo sapiens GN=SRP9                                  |           | 122.59  |
| P49458;P49458-2        | SRP09_HUMAN Signal recognition particle 9 kDa protein OS=Homo sapiens GN=SRP9 PE=1 SV=2;>sp P49458-2 SRP09_HUMAN Isofr      | 2.56E-25  |         |
| P49459                 | UBE2A_HUMAN Ubiquitin-conjugating enzyme E2 A OS=Homo sapiens GN=UBE2A PE=1 SV=2                                            |           | 20.35   |
| P49585                 | PCYT1A_HUMAN Choline-phosphate cytidyltransferase A OS=Homo sapiens GN=PCYT1A PE=1 SV=2                                     |           | 135.3   |
| P49588                 | SYAC_HUMAN Alanyl-tRNA synthetase, cytoplasmic OS=Homo sapiens GN=AARS PE=1 SV=2                                            | 0         |         |
| P49589                 | SYCC_HUMAN CysteinyI-tRNA synthetase, cytoplasmic OS=Homo sapiens GN=CARS PE=1 SV=3                                         |           | 202.47  |
| P49589-2               | SYCC_HUMAN Isoform 2 of CysteinyI-tRNA synthetase, cytoplasmic OS=Homo sapiens GN=CARS                                      |           | 202.47  |
| P49589;P49589-2        | SYCC_HUMAN CysteinyI-tRNA synthetase, cytoplasmic OS=Homo sapiens GN=CARS PE=1 SV=3;>sp P49589-2 SYCC_HUMAN Isoform         | 9.22E-110 |         |
| P49590                 | SYHM_HUMAN Probable histidyl-tRNA synthetase, mitochondrial OS=Homo sapiens GN=HARS2 PE=1 SV=1                              |           | 129.88  |
| P49591                 | SYSC_HUMAN Seryl-tRNA synthetase, cytoplasmic OS=Homo sapiens GN=SARS PE=1 SV=3                                             |           | 147.23  |
| P49593                 | PPM1F_HUMAN Protein phosphatase 1F OS=Homo sapiens GN=PPM1F PE=1 SV=3                                                       | 7.58E-07  |         |

|                          |                                                                                                                                                                                                                                             |           |        |
|--------------------------|---------------------------------------------------------------------------------------------------------------------------------------------------------------------------------------------------------------------------------------------|-----------|--------|
| P49642                   | PRI1_HUMAN DNA primase small subunit OS=Homo sapiens GN=PRIM1 PE=1 SV=1                                                                                                                                                                     | 1.81E-11  |        |
| P49643                   | PRI2_HUMAN DNA primase large subunit OS=Homo sapiens GN=PRIM2 PE=1 SV=2                                                                                                                                                                     |           | 33.72  |
| P49674;Q53EZ1;Q5U045;    | KC1E_HUMAN Casein kinase I isoform epsilon OS=Homo sapiens GN=CSNK1E PE=1 SV=1;>tr Q53EZ1 Q53EZ1_HUMAN Casein kinase I isoform epsilon OS=Homo sapiens GN=CSNK1E PE=1 SV=1                                                                  | 7.87E-07  |        |
| P49703                   | ARL4D_HUMAN ADP-ribosylation factor-like protein 4D OS=Homo sapiens GN=ARL4D PE=1 SV=2                                                                                                                                                      |           |        |
| P49711                   | CTCF_HUMAN Transcriptional repressor CTCF OS=Homo sapiens GN=CTCF PE=1 SV=1                                                                                                                                                                 |           |        |
| P49720                   | PSB3_HUMAN Proteasome subunit beta type-3 OS=Homo sapiens GN=PSMB3 PE=1 SV=2                                                                                                                                                                |           | 620.12 |
| P49721                   | PSB2_HUMAN Proteasome subunit beta type-2 OS=Homo sapiens GN=PSMB2 PE=1 SV=1                                                                                                                                                                |           | 761.13 |
| P49736                   | MCM2_HUMAN DNA replication licensing factor MCM2 OS=Homo sapiens GN=MCM2 PE=1 SV=4                                                                                                                                                          |           | 456.19 |
| P49747                   | COMP_HUMAN Cartilage oligomeric matrix protein OS=Homo sapiens GN=COMP PE=1 SV=2                                                                                                                                                            | 2.37E-246 |        |
| P49748                   | ACADV_HUMAN Very long-chain specific acyl-CoA dehydrogenase, mitochondrial OS=Homo sapiens GN=ACADVL PE=1 SV=1                                                                                                                              |           | 364.95 |
| P49748-2                 | ACADV_HUMAN Isoform 2 of Very long-chain specific acyl-CoA dehydrogenase, mitochondrial OS=Homo sapiens GN=ACADVL                                                                                                                           |           | 364.95 |
| P49748;P49748-2          | ACADV_HUMAN Very long-chain specific acyl-CoA dehydrogenase, mitochondrial OS=Homo sapiens GN=ACADVL PE=1 SV=1;>sp P49748 P49748-2_HUMAN Very long-chain specific acyl-CoA dehydrogenase, mitochondrial OS=Homo sapiens GN=ACADVL PE=1 SV=1 | 1.26E-131 |        |
| P49750                   | YLPM1_HUMAN YLP motif-containing protein 1 OS=Homo sapiens GN=YLPM1 PE=1 SV=3                                                                                                                                                               |           | 148.9  |
| P49750-3                 | YLPM1_HUMAN Isoform 3 of YLP motif-containing protein 1 OS=Homo sapiens GN=YLPM1                                                                                                                                                            |           | 103.71 |
| P49750-4                 | YLPM1_HUMAN Isoform 4 of YLP motif-containing protein 1 OS=Homo sapiens GN=YLPM1                                                                                                                                                            |           | 148.9  |
| P49750-4;P49750;P49750-3 | YLPM1_HUMAN Isoform 4 of YLP motif-containing protein 1 OS=Homo sapiens GN=YLPM1;>sp P49750 YLPM1_HUMAN YLP motif-containing protein 1 OS=Homo sapiens GN=YLPM1                                                                             | 3.63E-09  |        |
| P49753;B4DV16;Q86TX2;    | ACOT2_HUMAN Acyl-coenzyme A thioesterase 2, mitochondrial OS=Homo sapiens GN=ACOT2 PE=1 SV=6;>tr B4DV16 B4DV16_HUMAN Acyl-coenzyme A thioesterase 2, mitochondrial OS=Homo sapiens GN=ACOT2 PE=1 SV=6                                       | 6.11E-61  |        |
| P49755                   | TMEDA_HUMAN Transmembrane emp24 domain-containing protein 10 OS=Homo sapiens GN=TMED10 PE=1 SV=2                                                                                                                                            |           | 728.29 |
| P49756                   | RBM25_HUMAN RNA-binding protein 25 OS=Homo sapiens GN=RBM25 PE=1 SV=3                                                                                                                                                                       |           | 267.64 |
| P49756-2                 | RBM25_HUMAN Isoform 2 of RNA-binding protein 25 OS=Homo sapiens GN=RBM25                                                                                                                                                                    |           | 82.52  |
| P49756-3                 | RBM25_HUMAN Isoform 3 of RNA-binding protein 25 OS=Homo sapiens GN=RBM25                                                                                                                                                                    |           | 82.52  |
| P49756-4                 | RBM25_HUMAN Isoform 4 of RNA-binding protein 25 OS=Homo sapiens GN=RBM25                                                                                                                                                                    |           |        |
| P49757;B2RCI6;P49757-3   | NUMB_HUMAN Protein numb homolog OS=Homo sapiens GN=NUMB PE=1 SV=2;>tr B2RCI6 B2RCI6_HUMAN cDNA, FLJ96094, highly conserved human protein OS=Homo sapiens GN=NUMB PE=1 SV=2                                                                  | 1.44E-06  |        |
| P49760                   | CLK2_HUMAN Dual specificity protein kinase CLK2 OS=Homo sapiens GN=CLK2 PE=1 SV=1                                                                                                                                                           |           |        |
| P49760-2                 | CLK2_HUMAN Isoform 2 of Dual specificity protein kinase CLK2 OS=Homo sapiens GN=CLK2                                                                                                                                                        |           |        |
| P49760-3                 | CLK2_HUMAN Isoform 3 of Dual specificity protein kinase CLK2 OS=Homo sapiens GN=CLK2                                                                                                                                                        |           |        |
| P49768                   | PSN1_HUMAN Presenilin-1 OS=Homo sapiens GN=PSEN1 PE=1 SV=1                                                                                                                                                                                  |           | 34.82  |
| P49768-2                 | PSN1_HUMAN Isoform 2 of Presenilin-1 OS=Homo sapiens GN=PSEN1                                                                                                                                                                               |           | 34.82  |
| P49768-3                 | PSN1_HUMAN Isoform 3 of Presenilin-1 OS=Homo sapiens GN=PSEN1                                                                                                                                                                               |           | 34.82  |
| P49768-5                 | PSN1_HUMAN Isoform 5 of Presenilin-1 OS=Homo sapiens GN=PSEN1                                                                                                                                                                               |           | 34.82  |
| P49768-6                 | PSN1_HUMAN Isoform 6 of Presenilin-1 OS=Homo sapiens GN=PSEN1                                                                                                                                                                               |           | 34.82  |
| P49770                   | EI2BB_HUMAN Translation initiation factor eIF-2B subunit beta OS=Homo sapiens GN=EIF2B2 PE=1 SV=3                                                                                                                                           | 3.34E-21  |        |
| P49773                   | HINT1_HUMAN Histidine triad nucleotide-binding protein 1 OS=Homo sapiens GN=HINT1 PE=1 SV=2                                                                                                                                                 |           | 471.23 |
| P49790                   | NU153_HUMAN Nuclear pore complex protein Nup153 OS=Homo sapiens GN=NUP153 PE=1 SV=2                                                                                                                                                         |           |        |
| P49792                   | RBP2_HUMAN E3 SUMO-protein ligase RanBP2 OS=Homo sapiens GN=RANBP2 PE=1 SV=2                                                                                                                                                                |           | 888.42 |
| P49798                   | RGS4_HUMAN Regulator of G-protein signaling 4 OS=Homo sapiens GN=RGS4 PE=1 SV=1                                                                                                                                                             |           | 31.61  |
| P49810                   | PSN2_HUMAN Presenilin-2 OS=Homo sapiens GN=PSEN2 PE=1 SV=1                                                                                                                                                                                  |           | 34.82  |
| P49821                   | NDUV1_HUMAN NADH dehydrogenase [ubiquinone] flavoprotein 1, mitochondrial OS=Homo sapiens GN=NDUFV1 PE=1 SV=4                                                                                                                               |           | 129.15 |
| P49821-2                 | NDUV1_HUMAN Isoform 2 of NADH dehydrogenase [ubiquinone] flavoprotein 1, mitochondrial OS=Homo sapiens GN=NDUFV1                                                                                                                            |           | 129.15 |
| P49821;P49821-2          | NDUV1_HUMAN NADH dehydrogenase [ubiquinone] flavoprotein 1, mitochondrial OS=Homo sapiens GN=NDUFV1 PE=1 SV=4;>sp P49821 P49821-2_HUMAN NADH dehydrogenase [ubiquinone] flavoprotein 1, mitochondrial OS=Homo sapiens GN=NDUFV1 PE=1 SV=4   | 2.62E-25  |        |
| P49841-2;P49841          | GSK3B_HUMAN Isoform 2 of Glycogen synthase kinase-3 beta OS=Homo sapiens GN=GSK3B;>sp P49841 GSK3B_HUMAN Glycogen synthase kinase-3 beta OS=Homo sapiens GN=GSK3B                                                                           | 1.32E-10  |        |
| P49863                   | GRAK_HUMAN Granzyme K OS=Homo sapiens GN=GZMK PE=1 SV=1                                                                                                                                                                                     |           | 14.6   |
| P49902                   | 5NTC_HUMAN Cytosolic purine 5-nucleotidase OS=Homo sapiens GN=NT5C2 PE=1 SV=1                                                                                                                                                               | 3.64E-31  |        |
| P49903                   | SPS1_HUMAN Selenide, water dikinase 1 OS=Homo sapiens GN=SEPHS1 PE=1 SV=2                                                                                                                                                                   |           | 155.28 |
| P49913                   | CAMP_HUMAN Cathelicidin antimicrobial peptide OS=Homo sapiens GN=CAMP PE=1 SV=1                                                                                                                                                             | 9.68E-08  |        |
| P49914                   | MTHFS_HUMAN 5-formyltetrahydrofolate cyclo-ligase OS=Homo sapiens GN=MTHFS PE=1 SV=2                                                                                                                                                        | 1.55E-10  |        |
| P49915                   | GUAA_HUMAN GMP synthase [glutamine-hydrolyzing] OS=Homo sapiens GN=GMPS PE=1 SV=1                                                                                                                                                           |           | 90.9   |
| P49916                   | DNLI3_HUMAN DNA ligase 3 OS=Homo sapiens GN=LIG3 PE=1 SV=2                                                                                                                                                                                  |           | 233.61 |
| P49916-2                 | DNLI3_HUMAN Isoform Beta of DNA ligase 3 OS=Homo sapiens GN=LIG3                                                                                                                                                                            |           | 188.53 |
| P49916;P49916-2          | DNLI3_HUMAN DNA ligase 3 OS=Homo sapiens GN=LIG3 PE=1 SV=2;>sp P49916-2 DNLI3_HUMAN Isoform Beta of DNA ligase 3 OS=Homo sapiens GN=LIG3                                                                                                    | 8.13E-12  |        |
| P49917                   | DNLI4_HUMAN DNA ligase 4 OS=Homo sapiens GN=LIG4 PE=1 SV=2                                                                                                                                                                                  |           | 41.37  |
| P49959                   | MRE11_HUMAN Double-strand break repair protein MRE11A OS=Homo sapiens GN=MRE11A PE=1 SV=3                                                                                                                                                   |           | 55.06  |
| P49959-2                 | MRE11_HUMAN Isoform 2 of Double-strand break repair protein MRE11A OS=Homo sapiens GN=MRE11A                                                                                                                                                |           | 55.06  |
| P49959;P49959-2          | MRE11_HUMAN Double-strand break repair protein MRE11A OS=Homo sapiens GN=MRE11A PE=1 SV=3;>sp P49959-2 MRE11_HUMAN Isoform 2 of Double-strand break repair protein MRE11A OS=Homo sapiens GN=MRE11A                                         | 4.64E-76  |        |
| P49961                   | ENTP1_HUMAN Ectonucleoside triphosphate diphosphohydrolase 1 OS=Homo sapiens GN=ENTPD1 PE=1 SV=1                                                                                                                                            |           |        |
| P49961-2                 | ENTP1_HUMAN Isoform Placental I of Ectonucleoside triphosphate diphosphohydrolase 1 OS=Homo sapiens GN=ENTPD1                                                                                                                               |           |        |
| P50135                   | HNMT_HUMAN Histamine N-methyltransferase OS=Homo sapiens GN=HNMT PE=1 SV=1                                                                                                                                                                  |           |        |
| P50148                   | GNAQ_HUMAN Guanine nucleotide-binding protein G(q) subunit alpha OS=Homo sapiens GN=GNAQ PE=1 SV=4                                                                                                                                          |           | 198.61 |
| P50151                   | GBG10_HUMAN Guanine nucleotide-binding protein G(I)/G(S)/G(O) subunit gamma-10 OS=Homo sapiens GN=GNG10 PE=1 SV=1                                                                                                                           |           |        |
| P50213                   | IDH3A_HUMAN Isocitrate dehydrogenase [NAD] subunit alpha, mitochondrial OS=Homo sapiens GN=IDH3A PE=1 SV=1                                                                                                                                  |           | 348.61 |
| P50213-2                 | IDH3A_HUMAN Isoform 2 of Isocitrate dehydrogenase [NAD] subunit alpha, mitochondrial OS=Homo sapiens GN=IDH3A                                                                                                                               |           | 225.06 |

|                        |                                                                                                                            |            |         |
|------------------------|----------------------------------------------------------------------------------------------------------------------------|------------|---------|
| P50213;P50213-2        | IDH3A_HUMAN Isocitrate dehydrogenase [NAD] subunit alpha, mitochondrial OS=Homo sapiens GN=IDH3A PE=1 SV=1;>sp P50213-     | 5.08E-65   |         |
| P50224;P50225-2        | ST1A3_HUMAN Sulfotransferase 1A3/1A4 OS=Homo sapiens GN=SULT1A3 PE=1 SV=1;>sp P50225-2 ST1A1_HUMAN Isoform 2 of Su         | 9.53E-13   |         |
| P50225;P50226          | ST1A1_HUMAN Sulfotransferase 1A1 OS=Homo sapiens GN=SULT1A1 PE=1 SV=3;>sp P50226 ST1A2_HUMAN Sulfotransferase 1A2 C        | 2.86E-11   |         |
| P50226;P50225          | ST1A2_HUMAN Sulfotransferase 1A2 OS=Homo sapiens GN=SULT1A2 PE=1 SV=2;>sp P50225 ST1A1_HUMAN Sulfotransferase 1A1 C        | 2.18E-12   |         |
| P50238                 | CRIP1_HUMAN Cysteine-rich protein 1 OS=Homo sapiens GN=CRIP1 PE=1 SV=3                                                     | 8.10E-09   |         |
| P50281                 | MMP14_HUMAN Matrix metalloproteinase-14 OS=Homo sapiens GN=MMP14 PE=1 SV=3                                                 |            | 268.2   |
| P50395                 | GDIB_HUMAN Rab GDP dissociation inhibitor beta OS=Homo sapiens GN=GDIB PE=1 SV=2                                           |            | 654.22  |
| P50402                 | EMD_HUMAN Emerin OS=Homo sapiens GN=EMD PE=1 SV=1                                                                          |            | 121.96  |
| P50416                 | CPT1A_HUMAN Carnitine O-palmitoyltransferase 1, liver isoform OS=Homo sapiens GN=CPT1A PE=1 SV=2                           |            |         |
| P50416-2               | CPT1A_HUMAN Isoform 2 of Carnitine O-palmitoyltransferase 1, liver isoform OS=Homo sapiens GN=CPT1A                        |            |         |
| P50416;P50416-2        | CPT1A_HUMAN Carnitine O-palmitoyltransferase 1, liver isoform OS=Homo sapiens GN=CPT1A PE=1 SV=2;>sp P50416-2 CPT1A_HUI    | 0.00017048 |         |
| P50440;P50440-2;P50440 | GATM_HUMAN Glycine amidinotransferase, mitochondrial OS=Homo sapiens GN=GATM PE=1 SV=1;>sp P50440-2 GATM_HUMAN Isf         | 5.23E-78   |         |
| P50452                 | SPB8_HUMAN Serpin B8 OS=Homo sapiens GN=SERPINB8 PE=1 SV=2                                                                 |            | 43.62   |
| P50453                 | SPB9_HUMAN Serpin B9 OS=Homo sapiens GN=SERPINB9 PE=1 SV=1                                                                 |            | 29.52   |
| P50454                 | SERPH_HUMAN Serpin H1 OS=Homo sapiens GN=SERPINH1 PE=1 SV=2                                                                |            | 1537.96 |
| P50479                 | PDLI4_HUMAN PDZ and LIM domain protein 4 OS=Homo sapiens GN=PDLIM4 PE=1 SV=2                                               | 3.15E-11   |         |
| P50502                 | F10A1_HUMAN Hsc70-interacting protein OS=Homo sapiens GN=ST13 PE=1 SV=2                                                    |            | 123.18  |
| P50542                 | PEX5_HUMAN Peroxisomal targeting signal 1 receptor OS=Homo sapiens GN=PEX5 PE=1 SV=3                                       |            |         |
| P50542-2               | PEX5_HUMAN Isoform 2 of Peroxisomal targeting signal 1 receptor OS=Homo sapiens GN=PEX5                                    |            |         |
| P50542-3               | PEX5_HUMAN Isoform 3 of Peroxisomal targeting signal 1 receptor OS=Homo sapiens GN=PEX5                                    |            |         |
| P50549                 | ETV1_HUMAN ETS translocation variant 1 OS=Homo sapiens GN=ETV1 PE=1 SV=2                                                   |            | 29.69   |
| P50549-2               | ETV1_HUMAN Isoform 2 of ETS translocation variant 1 OS=Homo sapiens GN=ETV1                                                |            | 29.69   |
| P50552                 | VASP_HUMAN Vasodilator-stimulated phosphoprotein OS=Homo sapiens GN=VASP PE=1 SV=3                                         |            | 219.45  |
| P50570                 | DYN2_HUMAN Dynamin-2 OS=Homo sapiens GN=DNM2 PE=1 SV=2                                                                     |            | 269.41  |
| P50570-2               | DYN2_HUMAN Isoform 2 of Dynamin-2 OS=Homo sapiens GN=DNM2                                                                  |            | 269.41  |
| P50570;P50570-2        | DYN2_HUMAN Dynamin-2 OS=Homo sapiens GN=DNM2 PE=1 SV=2;>sp P50570-2 DYN2_HUMAN Isoform 2 of Dynamin-2 OS=Homc              | 6.27E-102  |         |
| P50579                 | AMPM2_HUMAN Methionine aminopeptidase 2 OS=Homo sapiens GN=METAP2 PE=1 SV=1                                                |            | 27.7    |
| P50583                 | AP4A_HUMAN Bis(5'-nucleosyl)-tetraphosphatase [asymmetrical] OS=Homo sapiens GN=NUDT2 PE=1 SV=3                            |            |         |
| P50613                 | CDK7_HUMAN Cyclin-dependent kinase 7 OS=Homo sapiens GN=CDK7 PE=1 SV=1                                                     |            | 147.03  |
| P50613;D6RAD4;D6R9G1;  | CDK7_HUMAN Cell division protein kinase 7 OS=Homo sapiens GN=CDK7 PE=1 SV=1;>tr D6RAD4 D6RAD4_HUMAN Uncharacterized        | 1.02E-23   |         |
| P50748                 | KNTC1_HUMAN Kinetochore-associated protein 1 OS=Homo sapiens GN=KNTC1 PE=1 SV=1                                            | 2.99E-11   |         |
| P50750                 | CDK9_HUMAN Cyclin-dependent kinase 9 OS=Homo sapiens GN=CDK9 PE=1 SV=3                                                     |            | 133.41  |
| P50750-2               | CDK9_HUMAN Isoform 2 of Cyclin-dependent kinase 9 OS=Homo sapiens GN=CDK9                                                  |            | 133.41  |
| P50750-2;B2R9L6;B5BU5; | 2 CDK9_HUMAN Isoform 2 of Cell division protein kinase 9 OS=Homo sapiens GN=CDK9;>tr B2R9L6 B2R9L6_HUMAN cDNA, FLJ9445     | 7.36E-14   |         |
| P50750-2;P50750        | 2 CDK9_HUMAN Isoform 2 of Cyclin-dependent kinase 9 OS=Homo sapiens GN=CDK9;>sp P50750 CDK9_HUMAN Cyclin-dependent k       | 4.29E-14   |         |
| P50851                 | LRBA_HUMAN Lipopolysaccharide-responsive and beige-like anchor protein OS=Homo sapiens GN=LRBA PE=1 SV=4                   |            |         |
| P50851-2               | LRBA_HUMAN Isoform 2 of Lipopolysaccharide-responsive and beige-like anchor protein OS=Homo sapiens GN=LRBA                |            |         |
| P50851-2;P50851        | 2 LRBA_HUMAN Isoform 2 of Lipopolysaccharide-responsive and beige-like anchor protein OS=Homo sapiens GN=LRBA;>sp P50851 L | 1.57E-23   |         |
| P50895                 | BCAM_HUMAN Basal cell adhesion molecule OS=Homo sapiens GN=BCAM PE=1 SV=2                                                  |            |         |
| P50897                 | PPT1_HUMAN Palmitoyl-protein thioesterase 1 OS=Homo sapiens GN=PPT1 PE=1 SV=1                                              |            | 195.43  |
| P50914                 | RL14_HUMAN 60S ribosomal protein L14 OS=Homo sapiens GN=RPL14 PE=1 SV=4                                                    |            | 475.66  |
| P50990                 | TCPQ_HUMAN T-complex protein 1 subunit theta OS=Homo sapiens GN=CCT8 PE=1 SV=4                                             |            | 541.15  |
| P50991                 | TCPD_HUMAN T-complex protein 1 subunit delta OS=Homo sapiens GN=CCT4 PE=1 SV=4                                             |            | 644.37  |
| P50993                 | AT1A2_HUMAN Sodium/potassium-transporting ATPase subunit alpha-2 OS=Homo sapiens GN=ATP1A2 PE=1 SV=1                       |            | 1268.58 |
| P50995                 | ANX11_HUMAN Annexin A11 OS=Homo sapiens GN=ANXA11 PE=1 SV=1                                                                |            | 60.75   |
| P51003                 | PAPOA_HUMAN Poly(A) polymerase alpha OS=Homo sapiens GN=PAPOLA PE=1 SV=4                                                   | 2.51E-12   |         |
| P51114                 | FXR1_HUMAN Fragile X mental retardation syndrome-related protein 1 OS=Homo sapiens GN=FXR1 PE=1 SV=3                       |            | 442.55  |
| P51114-2               | FXR1_HUMAN Isoform 2 of Fragile X mental retardation syndrome-related protein 1 OS=Homo sapiens GN=FXR1                    |            | 365.18  |
| P51114-3               | FXR1_HUMAN Isoform 3 of Fragile X mental retardation syndrome-related protein 1 OS=Homo sapiens GN=FXR1                    |            | 333.08  |
| P51114;B4DXZ6;P51114-  | FXR1_HUMAN Fragile X mental retardation syndrome-related protein 1 OS=Homo sapiens GN=FXR1 PE=1 SV=3;>tr B4DXZ6 B4DXZ6     | 1.94E-113  |         |
| P51116                 | FXR2_HUMAN Fragile X mental retardation syndrome-related protein 2 OS=Homo sapiens GN=FXR2 PE=1 SV=2                       |            | 135.81  |
| P51148                 | RAB5C_HUMAN Ras-related protein Rab-5C OS=Homo sapiens GN=RAB5C PE=1 SV=2                                                  |            | 896.67  |
| P51149                 | RAB7A_HUMAN Ras-related protein Rab-7a OS=Homo sapiens GN=RAB7A PE=1 SV=1                                                  |            | 515.7   |
| P51151                 | RAB9A_HUMAN Ras-related protein Rab-9A OS=Homo sapiens GN=RAB9A PE=1 SV=1                                                  |            | 74.68   |
| P51153                 | RAB13_HUMAN Ras-related protein Rab-13 OS=Homo sapiens GN=RAB13 PE=1 SV=1                                                  |            | 288.56  |
| P51157                 | RAB28_HUMAN Ras-related protein Rab-28 OS=Homo sapiens GN=RAB28 PE=1 SV=2                                                  |            | 46.29   |
| P51157-2               | RAB28_HUMAN Isoform L of Ras-related protein Rab-28 OS=Homo sapiens GN=RAB28                                               |            | 46.29   |
| P51157;P51157-2;D6RHF  | RAB28_HUMAN Ras-related protein Rab-28 OS=Homo sapiens GN=RAB28 PE=1 SV=2;>sp P51157-2 RAB28_HUMAN Isoform L of Ra:        | 3.89E-06   |         |
| P51159                 | RB27A_HUMAN Ras-related protein Rab-27A OS=Homo sapiens GN=RAB27A PE=1 SV=3                                                |            | 122.6   |
| P51159-2               | RB27A_HUMAN Isoform Short of Ras-related protein Rab-27A OS=Homo sapiens GN=RAB27A                                         |            | 105.77  |
| P51159;P51159-2        | RB27A_HUMAN Ras-related protein Rab-27A OS=Homo sapiens GN=RAB27A PE=1 SV=3;>sp P51159-2 RB27A_HUMAN Isoform Shor          | 2.11E-10   |         |



|                          |                                                                                                                        |           |        |
|--------------------------|------------------------------------------------------------------------------------------------------------------------|-----------|--------|
| P51398                   | RT29_HUMAN 28S ribosomal protein S29, mitochondrial OS=Homo sapiens GN=DAP3 PE=1 SV=1                                  |           | 403.6  |
| P51451                   | BLK_HUMAN Tyrosine-protein kinase Blk OS=Homo sapiens GN=BLK PE=1 SV=3                                                 |           | 65.4   |
| P51452                   | DUS3_HUMAN Dual specificity protein phosphatase 3 OS=Homo sapiens GN=DUSP3 PE=1 SV=1                                   |           | 93.16  |
| P51511                   | MMP15_HUMAN Matrix metalloproteinase-15 OS=Homo sapiens GN=MMP15 PE=1 SV=1                                             |           | 10.09  |
| P51531                   | SMCA2_HUMAN Probable global transcription activator SNF2L2 OS=Homo sapiens GN=SMARCA2 PE=1 SV=2                        |           | 35.68  |
| P51531-2                 | SMCA2_HUMAN Isoform Short of Probable global transcription activator SNF2L2 OS=Homo sapiens GN=SMARCA2                 |           | 35.68  |
| P51531;P51531-2          | SMCA2_HUMAN Probable global transcription activator SNF2L2 OS=Homo sapiens GN=SMARCA2 PE=1 SV=2;>sp P51531-2 SMCA2_f   | 2.33E-31  |        |
| P51532                   | SMCA4_HUMAN Transcription activator BRG1 OS=Homo sapiens GN=SMARCA4 PE=1 SV=2                                          |           | 152.47 |
| P51553                   | IDH3G_HUMAN Isocitrate dehydrogenase [NAD] subunit gamma, mitochondrial OS=Homo sapiens GN=IDH3G PE=1 SV=1             |           |        |
| P51570                   | GALK1_HUMAN Galactokinase OS=Homo sapiens GN=GALK1 PE=1 SV=1                                                           | 2.34E-24  |        |
| P51571                   | SSRD_HUMAN Translocon-associated protein subunit delta OS=Homo sapiens GN=SSR4 PE=1 SV=1                               |           | 339.89 |
| P51572                   | BAP31_HUMAN B-cell receptor-associated protein 31 OS=Homo sapiens GN=BCAP31 PE=1 SV=3                                  |           | 979.89 |
| P51580                   | TPMT_HUMAN Thiopurine S-methyltransferase OS=Homo sapiens GN=TPMT PE=1 SV=1                                            | 9.21E-10  |        |
| P51587                   | BRCA2_HUMAN Breast cancer type 2 susceptibility protein OS=Homo sapiens GN=BRCA2 PE=1 SV=2                             |           |        |
| P51606;A6NKZ2;P51606-2   | RENBP_HUMAN N-acylglucosamine 2-epimerase OS=Homo sapiens GN=RENBP PE=1 SV=2;>tr A6NKZ2 A6NKZ2_HUMAN Uncharacteri      | 6.36E-18  |        |
| P51608                   | MECP2_HUMAN Methyl-CpG-binding protein 2 OS=Homo sapiens GN=MECP2 PE=1 SV=1                                            |           |        |
| P51608-2                 | MECP2_HUMAN Isoform B of Methyl-CpG-binding protein 2 OS=Homo sapiens GN=MECP2                                         |           |        |
| P51608-2;A8K079;C6KG4    | 2 MECP2_HUMAN Isoform B of Methyl-CpG-binding protein 2 OS=Homo sapiens GN=MECP2;>tr A8K079 A8K079_HUMAN cDNA FLJ75    | 4.50E-10  |        |
| P51610                   | HCFC1_HUMAN Host cell factor 1 OS=Homo sapiens GN=HCFC1 PE=1 SV=2                                                      |           | 124.31 |
| P51610-2                 | HCFC1_HUMAN Isoform 2 of Host cell factor 1 OS=Homo sapiens GN=HCFC1                                                   |           | 124.31 |
| P51610-3                 | HCFC1_HUMAN Isoform 3 of Host cell factor 1 OS=Homo sapiens GN=HCFC1                                                   |           | 14.89  |
| P51610;P51610-2          | HCFC1_HUMAN Host cell factor 1 OS=Homo sapiens GN=HCFC1 PE=1 SV=2;>sp P51610-2 HCFC1_HUMAN Isoform 2 of Host cell fact | 3.59E-121 |        |
| P51636                   | CAV2_HUMAN Caveolin-2 OS=Homo sapiens GN=CAV2 PE=1 SV=2                                                                |           | 134.32 |
| P51636-2                 | CAV2_HUMAN Isoform Beta of Caveolin-2 OS=Homo sapiens GN=CAV2                                                          |           | 134.32 |
| P51636-3                 | CAV2_HUMAN Isoform C of Caveolin-2 OS=Homo sapiens GN=CAV2                                                             |           | 31.55  |
| P51636;Q53X57;P51636-2   | CAV2_HUMAN Caveolin-2 OS=Homo sapiens GN=CAV2 PE=1 SV=2;>tr Q53X57 Q53X57_HUMAN Caveolin (Fragment) OS=Homo sapi       | 1.73E-05  |        |
| P51648-2;P51648          | 2 AL3A2_HUMAN Isoform 2 of Fatty aldehyde dehydrogenase OS=Homo sapiens GN=ALDH3A2;>sp P51648 AL3A2_HUMAN Fatty alde   | 2.95E-09  |        |
| P51649                   | SSDH_HUMAN Succinate-semialdehyde dehydrogenase, mitochondrial OS=Homo sapiens GN=ALDH5A1 PE=1 SV=2                    |           |        |
| P51659                   | DHB4_HUMAN Peroxisomal multifunctional enzyme type 2 OS=Homo sapiens GN=HSD17B4 PE=1 SV=3                              |           | 415.91 |
| P51665                   | PSD7_HUMAN 26S proteasome non-ATPase regulatory subunit 7 OS=Homo sapiens GN=PSMD7 PE=1 SV=2                           |           | 695.8  |
| P51687                   | SUOX_HUMAN Sulfite oxidase, mitochondrial OS=Homo sapiens GN=SUOX PE=1 SV=2                                            | 1.13E-09  |        |
| P51692                   | STA5B_HUMAN Signal transducer and activator of transcription 5B OS=Homo sapiens GN=STAT5B PE=1 SV=2                    | 9.68E-10  |        |
| P51784                   | UBP11_HUMAN Ubiquitin carboxyl-terminal hydrolase 11 OS=Homo sapiens GN=USP11 PE=1 SV=3                                | 1.41E-15  |        |
| P51787                   | KCNQ1_HUMAN Potassium voltage-gated channel subfamily KQT member 1 OS=Homo sapiens GN=KCNQ1 PE=1 SV=3                  |           |        |
| P51787-2                 | KCNQ1_HUMAN Isoform 2 of Potassium voltage-gated channel subfamily KQT member 1 OS=Homo sapiens GN=KCNQ1               |           |        |
| P51805                   | PLXA3_HUMAN Plexin-A3 OS=Homo sapiens GN=PLXNA3 PE=1 SV=2                                                              |           |        |
| P51808                   | DYLT3_HUMAN Dynein light chain Tctex-type 3 OS=Homo sapiens GN=DYNLT3 PE=1 SV=1                                        | 8.65E-35  |        |
| P51809                   | VAMP7_HUMAN Vesicle-associated membrane protein 7 OS=Homo sapiens GN=VAMP7 PE=1 SV=3                                   |           | 198.23 |
| P51809-2                 | VAMP7_HUMAN Isoform 2 of Vesicle-associated membrane protein 7 OS=Homo sapiens GN=VAMP7                                |           | 157.47 |
| P51809-2;P51809;P51809-2 | 2 VAMP7_HUMAN Isoform 2 of Vesicle-associated membrane protein 7 OS=Homo sapiens GN=VAMP7;>sp P51809 VAMP7_HUMAN Ve    | 5.50E-67  |        |
| P51809-3                 | VAMP7_HUMAN Isoform 3 of Vesicle-associated membrane protein 7 OS=Homo sapiens GN=VAMP7                                |           | 198.23 |
| P51809;P51809-3;P51809-3 | VAMP7_HUMAN Vesicle-associated membrane protein 7 OS=Homo sapiens GN=VAMP7 PE=1 SV=3;>sp P51809-3 VAMP7_HUMAN Iso      | 1.18E-24  |        |
| P51812                   | KS6A3_HUMAN Ribosomal protein S6 kinase alpha-3 OS=Homo sapiens GN=RPS6KA3 PE=1 SV=1                                   | 2.14E-34  |        |
| P51814                   | ZNF41_HUMAN Zinc finger protein 41 OS=Homo sapiens GN=ZNF41 PE=1 SV=2                                                  |           |        |
| P51814-2                 | ZNF41_HUMAN Isoform 2 of Zinc finger protein 41 OS=Homo sapiens GN=ZNF41                                               |           |        |
| P51814-3                 | ZNF41_HUMAN Isoform 3 of Zinc finger protein 41 OS=Homo sapiens GN=ZNF41                                               |           |        |
| P51814-4                 | ZNF41_HUMAN Isoform 4 of Zinc finger protein 41 OS=Homo sapiens GN=ZNF41                                               |           |        |
| P51814-5                 | ZNF41_HUMAN Isoform 5 of Zinc finger protein 41 OS=Homo sapiens GN=ZNF41                                               |           |        |
| P51814-6                 | ZNF41_HUMAN Isoform 6 of Zinc finger protein 41 OS=Homo sapiens GN=ZNF41                                               |           |        |
| P51814-7                 | ZNF41_HUMAN Isoform 7 of Zinc finger protein 41 OS=Homo sapiens GN=ZNF41                                               |           |        |
| P51814-8                 | ZNF41_HUMAN Isoform 8 of Zinc finger protein 41 OS=Homo sapiens GN=ZNF41                                               |           |        |
| P51825                   | AFF1_HUMAN AF4/FMR2 family member 1 OS=Homo sapiens GN=AFF1 PE=1 SV=1                                                  |           | 23.73  |
| P51841                   | GUC2F_HUMAN Retinal guanylyl cyclase 2 OS=Homo sapiens GN=GUCY2F PE=2 SV=2                                             |           |        |
| P51858                   | HDGF_HUMAN Hepatoma-derived growth factor OS=Homo sapiens GN=HDGF PE=1 SV=1                                            |           | 352.29 |
| P51878                   | CASP5_HUMAN Caspase-5 OS=Homo sapiens GN=CASP5 PE=1 SV=3                                                               |           |        |
| P51878-2                 | CASP5_HUMAN Isoform 2 of Caspase-5 OS=Homo sapiens GN=CASP5                                                            |           |        |
| P51878-4                 | CASP5_HUMAN Isoform 4 of Caspase-5 OS=Homo sapiens GN=CASP5                                                            |           |        |
| P51878-5                 | CASP5_HUMAN Isoform 5 of Caspase-5 OS=Homo sapiens GN=CASP5                                                            |           |        |
| P51878-6                 | CASP5_HUMAN Isoform 6 of Caspase-5 OS=Homo sapiens GN=CASP5                                                            |           |        |
| P51884                   | LUM_HUMAN Lumican OS=Homo sapiens GN=LUM PE=1 SV=2                                                                     |           | 0      |
| P51888                   | PRELP_HUMAN Prolargin OS=Homo sapiens GN=PRELP PE=1 SV=1                                                               |           | 0      |



|                        |                                                                                                                         |           |         |
|------------------------|-------------------------------------------------------------------------------------------------------------------------|-----------|---------|
| P51911                 | CNN1_HUMAN Calponin-1 OS=Homo sapiens GN=CNN1 PE=1 SV=2                                                                 |           | 7.03    |
| P51946                 | CCNH_HUMAN Cyclin-H OS=Homo sapiens GN=CCNH PE=1 SV=1                                                                   |           | 118     |
| P51948                 | MAT1_HUMAN CDK-activating kinase assembly factor MAT1 OS=Homo sapiens GN=MNAT1 PE=1 SV=1                                |           | 53.44   |
| P51965;A6NDQ7;C9J2P0;  | UB2E1_HUMAN Ubiquitin-conjugating enzyme E2 E1 OS=Homo sapiens GN=UBE2E1 PE=1 SV=1;>tr A6NDQ7 A6NDQ7_HUMAN Ubiqu        | 1.23E-16  |         |
| P51970                 | NDUA8_HUMAN NADH dehydrogenase [ubiquinone] 1 alpha subcomplex subunit 8 OS=Homo sapiens GN=NDUFA8 PE=1 SV=3            |           | 138.33  |
| P51991                 | ROA3_HUMAN Heterogeneous nuclear ribonucleoprotein A3 OS=Homo sapiens GN=HNRNPA3 PE=1 SV=2                              |           | 451.94  |
| P51991-2               | ROA3_HUMAN Isoform 2 of Heterogeneous nuclear ribonucleoprotein A3 OS=Homo sapiens GN=HNRNPA3                           |           | 435.52  |
| P51991;P51991-2        | ROA3_HUMAN Heterogeneous nuclear ribonucleoprotein A3 OS=Homo sapiens GN=HNRNPA3 PE=1 SV=2;>sp P51991-2 ROA3_HUMA       | 7.88E-225 |         |
| P52209                 | 6PGD_HUMAN 6-phosphogluconate dehydrogenase, decarboxylating OS=Homo sapiens GN=PGD PE=1 SV=3                           |           | 103.13  |
| P52272                 | HNRPM_HUMAN Heterogeneous nuclear ribonucleoprotein M OS=Homo sapiens GN=HNRNPM PE=1 SV=3                               |           | 1154.91 |
| P52272-2               | HNRPM_HUMAN Isoform 2 of Heterogeneous nuclear ribonucleoprotein M OS=Homo sapiens GN=HNRNPM                            |           | 1154.91 |
| P52272;P52272-2        | HNRPM_HUMAN Heterogeneous nuclear ribonucleoprotein M OS=Homo sapiens GN=HNRNPM PE=1 SV=3;>sp P52272-2 HNRPM_HUM        | 0         |         |
| P52292                 | IMA2_HUMAN Importin subunit alpha-2 OS=Homo sapiens GN=KPNA2 PE=1 SV=1                                                  |           |         |
| P52294                 | IMA1_HUMAN Importin subunit alpha-1 OS=Homo sapiens GN=KPNA1 PE=1 SV=3                                                  |           |         |
| P52298                 | NCBP2_HUMAN Nuclear cap-binding protein subunit 2 OS=Homo sapiens GN=NCBP2 PE=1 SV=1                                    |           | 163.14  |
| P52298-2               | NCBP2_HUMAN Isoform 2 of Nuclear cap-binding protein subunit 2 OS=Homo sapiens GN=NCBP2                                 |           | 89.45   |
| P52298;P52298-2        | NCBP2_HUMAN Nuclear cap-binding protein subunit 2 OS=Homo sapiens GN=NCBP2 PE=1 SV=1;>sp P52298-2 NCBP2_HUMAN Isofo     | 1.46E-05  |         |
| P52306                 | GDS1_HUMAN Rap1 GTPase-GDP dissociation stimulator 1 OS=Homo sapiens GN=RAP1GDS1 PE=1 SV=3                              |           |         |
| P52306-2               | GDS1_HUMAN Isoform 2 of Rap1 GTPase-GDP dissociation stimulator 1 OS=Homo sapiens GN=RAP1GDS1                           |           |         |
| P52306;P52306-2        | GDS1_HUMAN Rap1 GTPase-GDP dissociation stimulator 1 OS=Homo sapiens GN=RAP1GDS1 PE=1 SV=3;>sp P52306-2 GDS1_HUM/       | 2.84E-24  |         |
| P52333                 | JAK3_HUMAN Tyrosine-protein kinase JAK3 OS=Homo sapiens GN=JAK3 PE=1 SV=2                                               |           |         |
| P52333-2               | JAK3_HUMAN Isoform 1 of Tyrosine-protein kinase JAK3 OS=Homo sapiens GN=JAK3                                            |           |         |
| P52434                 | RPAB3_HUMAN DNA-directed RNA polymerases I, II, and III subunit RPABC3 OS=Homo sapiens GN=POLR2H PE=1 SV=4              |           | 193.17  |
| P52435                 | RPB11_HUMAN DNA-directed RNA polymerase II subunit RPB11-a OS=Homo sapiens GN=POLR2J PE=1 SV=1                          |           | 30.42   |
| P52565                 | GDIR1_HUMAN Rho GDP-dissociation inhibitor 1 OS=Homo sapiens GN=ARHGDIA PE=1 SV=3                                       |           | 252.34  |
| P52566                 | GDIR2_HUMAN Rho GDP-dissociation inhibitor 2 OS=Homo sapiens GN=ARHGDIB PE=1 SV=3                                       |           | 131.94  |
| P52569                 | CTR2_HUMAN Low affinity cationic amino acid transporter 2 OS=Homo sapiens GN=SLC7A2 PE=1 SV=2                           |           | 45.99   |
| P52569-2               | CTR2_HUMAN Isoform 2 of Low affinity cationic amino acid transporter 2 OS=Homo sapiens GN=SLC7A2                        |           |         |
| P52569-3               | CTR2_HUMAN Isoform 3 of Low affinity cationic amino acid transporter 2 OS=Homo sapiens GN=SLC7A2                        |           | 45.99   |
| P52594                 | AGFG1_HUMAN Arf-GAP domain and FG repeats-containing protein 1 OS=Homo sapiens GN=AGFG1 PE=1 SV=2                       |           | 67.97   |
| P52594-2               | AGFG1_HUMAN Isoform 2 of Arf-GAP domain and FG repeats-containing protein 1 OS=Homo sapiens GN=AGFG1                    |           | 67.97   |
| P52594-3               | AGFG1_HUMAN Isoform 3 of Arf-GAP domain and FG repeats-containing protein 1 OS=Homo sapiens GN=AGFG1                    |           | 67.97   |
| P52594;P52594-3;P52594 | AGFG1_HUMAN Arf-GAP domain and FG repeats-containing protein 1 OS=Homo sapiens GN=AGFG1 PE=1 SV=2;>sp P52594-3 AGFG     | 1.46E-09  |         |
| P52597                 | HNRPF_HUMAN Heterogeneous nuclear ribonucleoprotein F OS=Homo sapiens GN=HNRNPF PE=1 SV=3                               |           | 409.4   |
| P52630;B4DLC7;P52630-2 | STAT2_HUMAN Signal transducer and activator of transcription 2 OS=Homo sapiens GN=STAT2 PE=1 SV=1;>tr B4DLC7 B4DLC7_HUM | 7.17E-19  |         |
| P52655                 | TF2AA_HUMAN Transcription initiation factor IIA subunit 1 OS=Homo sapiens GN=GTF2A1 PE=1 SV=1                           | 4.33E-05  |         |
| P52657                 | T2AG_HUMAN Transcription initiation factor IIA subunit 2 OS=Homo sapiens GN=GTF2A2 PE=1 SV=1                            |           | 144.55  |
| P52701                 | MSH6_HUMAN DNA mismatch repair protein Msh6 OS=Homo sapiens GN=MSH6 PE=1 SV=2                                           |           | 336.57  |
| P52701-2               | MSH6_HUMAN Isoform GTBP-alt of DNA mismatch repair protein Msh6 OS=Homo sapiens GN=MSH6                                 |           | 311.63  |
| P52701;B4DF41;B4E3I4;P | MSH6_HUMAN DNA mismatch repair protein Msh6 OS=Homo sapiens GN=MSH6 PE=1 SV=2;>tr B4DF41 B4DF41_HUMAN cDNA FLJ5:        | 3.37E-35  |         |
| P52732                 | KIF11_HUMAN Kinesin-like protein KIF11 OS=Homo sapiens GN=KIF11 PE=1 SV=2                                               |           |         |
| P52735-2;P52735-3;P527 | 2 VAV2_HUMAN Isoform 2 of Guanine nucleotide exchange factor VAV2 OS=Homo sapiens GN=VAV2;>sp P52735-3 VAV2_HUMAN Isc   | 1.53E-24  |         |
| P52735;P52735-2;P52735 | VAV2_HUMAN Guanine nucleotide exchange factor VAV2 OS=Homo sapiens GN=VAV2 PE=1 SV=2;>sp P52735-2 VAV2_HUMAN Isofor     | 7.97E-07  |         |
| P52756                 | RBM5_HUMAN RNA-binding protein 5 OS=Homo sapiens GN=RBM5 PE=1 SV=2                                                      | 3.85E-15  |         |
| P52758                 | UK114_HUMAN Ribonuclease UK114 OS=Homo sapiens GN=HRSP12 PE=1 SV=1                                                      |           | 29.31   |
| P52788                 | SPSY_HUMAN Spermine synthase OS=Homo sapiens GN=SMS PE=1 SV=2                                                           |           | 35.14   |
| P52789                 | HXX2_HUMAN Hexokinase-2 OS=Homo sapiens GN=HK2 PE=1 SV=2                                                                |           | 163.76  |
| P52790                 | HXX3_HUMAN Hexokinase-3 OS=Homo sapiens GN=HK3 PE=1 SV=2                                                                |           | 73.99   |
| P52815                 | RM12_HUMAN 39S ribosomal protein L12, mitochondrial OS=Homo sapiens GN=MRPL12 PE=1 SV=2                                 |           | 168.02  |
| P52888                 | THOP1_HUMAN Thimet oligopeptidase OS=Homo sapiens GN=THOP1 PE=1 SV=2                                                    |           | 34.22   |
| P52895                 | AK1C2_HUMAN Aldo-keto reductase family 1 member C2 OS=Homo sapiens GN=AKR1C2 PE=1 SV=3                                  | 6.69E-75  |         |
| P52907                 | CAZA1_HUMAN F-actin-capping protein subunit alpha-1 OS=Homo sapiens GN=CAPZA1 PE=1 SV=3                                 |           | 311.51  |
| P52943                 | CRIP2_HUMAN Cysteine-rich protein 2 OS=Homo sapiens GN=CRIP2 PE=1 SV=1                                                  |           | 177.27  |
| P52948                 | NUP98_HUMAN Nuclear pore complex protein Nup98-Nup96 OS=Homo sapiens GN=NUP98 PE=1 SV=4                                 |           |         |
| P52948-2               | NUP98_HUMAN Isoform 2 of Nuclear pore complex protein Nup98-Nup96 OS=Homo sapiens GN=NUP98                              |           |         |
| P52948-3               | NUP98_HUMAN Isoform 3 of Nuclear pore complex protein Nup98-Nup96 OS=Homo sapiens GN=NUP98                              |           |         |
| P52948-4               | NUP98_HUMAN Isoform 4 of Nuclear pore complex protein Nup98-Nup96 OS=Homo sapiens GN=NUP98                              |           |         |
| P52948-5               | NUP98_HUMAN Isoform 5 of Nuclear pore complex protein Nup98-Nup96 OS=Homo sapiens GN=NUP98                              |           |         |
| P52948-6               | NUP98_HUMAN Isoform 6 of Nuclear pore complex protein Nup98-Nup96 OS=Homo sapiens GN=NUP98                              |           |         |
| P52948;P52948-5;P52948 | NUP98_HUMAN Nuclear pore complex protein Nup98-Nup96 OS=Homo sapiens GN=NUP98 PE=1 SV=4;>sp P52948-5 NUP98_HUMAN        | 5.12E-23  |         |
| P53004                 | BIEA_HUMAN Biliverdin reductase A OS=Homo sapiens GN=BLVRA PE=1 SV=2                                                    |           | 129.83  |

|                        |                                                                                                                      |           |         |
|------------------------|----------------------------------------------------------------------------------------------------------------------|-----------|---------|
| P53007                 | TXTP_HUMAN Tricarboxylate transport protein, mitochondrial OS=Homo sapiens GN=SLC25A1 PE=1 SV=2                      |           | 309.63  |
| P53041                 | PPP5_HUMAN Serine/threonine-protein phosphatase 5 OS=Homo sapiens GN=PPP5C PE=1 SV=1                                 | 4.48E-41  |         |
| P53365                 | ARFP2_HUMAN Arfaptin-2 OS=Homo sapiens GN=ARFIP2 PE=1 SV=1                                                           | 1.89E-10  |         |
| P53367                 | ARFP1_HUMAN Arfaptin-1 OS=Homo sapiens GN=ARFIP1 PE=1 SV=2                                                           |           |         |
| P53367-2               | ARFP1_HUMAN Isoform A of Arfaptin-1 OS=Homo sapiens GN=ARFIP1                                                        |           |         |
| P53367-2;P53367        | 2 ARFP1_HUMAN Isoform A of Arfaptin-1 OS=Homo sapiens GN=ARFIP1;>sp P53367 ARFP1_HUMAN Arfaptin-1 OS=Homo sapiens Gf | 1.57E-21  |         |
| P53367;P53367-2        | ARFP1_HUMAN Arfaptin-1 OS=Homo sapiens GN=ARFIP1 PE=1 SV=2;>sp P53367-2 ARFP1_HUMAN Isoform A of Arfaptin-1 OS=Hom   | 1.44E-44  |         |
| P53384;P53384-2        | NUBP1_HUMAN Cytosolic Fe-S cluster assembly factor NUBP1 OS=Homo sapiens GN=NUBP1 PE=1 SV=2;>sp P53384-2 NUBP1_HUM/  | 3.10E-12  |         |
| P53396                 | ACLY_HUMAN ATP-citrate synthase OS=Homo sapiens GN=ACLY PE=1 SV=3                                                    |           | 561.59  |
| P53582                 | AMPM1_HUMAN Methionine aminopeptidase 1 OS=Homo sapiens GN=METAP1 PE=1 SV=2                                          |           |         |
| P53597                 | SUCA_HUMAN Succinyl-CoA ligase [GDP-forming] subunit alpha, mitochondrial OS=Homo sapiens GN=SUCLG1 PE=1 SV=4        |           | 143.23  |
| P53602                 | MVD1_HUMAN Diphosphomevalonate decarboxylase OS=Homo sapiens GN=MVD PE=1 SV=1                                        | 7.05E-17  |         |
| P53611                 | PGTB2_HUMAN Geranylgeranyl transferase type-2 subunit beta OS=Homo sapiens GN=RABGGTB PE=1 SV=2                      | 3.85E-15  |         |
| P53618                 | COPB_HUMAN Coatamer subunit beta OS=Homo sapiens GN=COPB1 PE=1 SV=3                                                  |           | 227.45  |
| P53621                 | COPA_HUMAN Coatamer subunit alpha OS=Homo sapiens GN=COPA PE=1 SV=2                                                  |           | 398.2   |
| P53621-2               | COPA_HUMAN Isoform 2 of Coatamer subunit alpha OS=Homo sapiens GN=COPA                                               |           | 398.2   |
| P53621-2;P53621        | 2 COPA_HUMAN Isoform 2 of Coatamer subunit alpha OS=Homo sapiens GN=COPA;>sp P53621 COPA_HUMAN Coatamer subunit alpl | 1.24E-231 |         |
| P53634                 | CATC_HUMAN Dipeptidyl peptidase 1 OS=Homo sapiens GN=CTSC PE=1 SV=2                                                  |           | 278.82  |
| P53634-2               | CATC_HUMAN Isoform 2 of Dipeptidyl peptidase 1 OS=Homo sapiens GN=CTSC                                               |           | 77.26   |
| P53634;B4DJQ8          | CATC_HUMAN Dipeptidyl peptidase 1 OS=Homo sapiens GN=CTSC PE=1 SV=2;>tr B4DJQ8 B4DJQ8_HUMAN cDNA FLJ55694, highly s  | 1.36E-20  |         |
| P53667                 | LIMK1_HUMAN LIM domain kinase 1 OS=Homo sapiens GN=LIMK1 PE=1 SV=3                                                   |           |         |
| P53667-2               | LIMK1_HUMAN Isoform 2 of LIM domain kinase 1 OS=Homo sapiens GN=LIMK1                                                |           |         |
| P53667-3               | LIMK1_HUMAN Isoform 3 of LIM domain kinase 1 OS=Homo sapiens GN=LIMK1                                                |           |         |
| P53675                 | CLH2_HUMAN Clathrin heavy chain 2 OS=Homo sapiens GN=CLTCL1 PE=1 SV=2                                                |           | 1384.51 |
| P53675-2               | CLH2_HUMAN Isoform 2 of Clathrin heavy chain 2 OS=Homo sapiens GN=CLTCL1                                             |           | 1384.51 |
| P53680                 | AP2S1_HUMAN AP-2 complex subunit sigma OS=Homo sapiens GN=AP2S1 PE=1 SV=2                                            |           | 57.99   |
| P53680-2               | AP2S1_HUMAN Isoform 2 of AP-2 complex subunit sigma OS=Homo sapiens GN=AP2S1                                         |           | 27.47   |
| P53680;P53680-2        | AP2S1_HUMAN AP-2 complex subunit sigma OS=Homo sapiens GN=AP2S1 PE=1 SV=2;>sp P53680-2 AP2S1_HUMAN Isoform 2 of Af   | 3.42E-12  |         |
| P53701                 | CCHL_HUMAN Cytochrome c-type heme lyase OS=Homo sapiens GN=HCCS PE=1 SV=1                                            |           |         |
| P53778                 | MK12_HUMAN Mitogen-activated protein kinase 12 OS=Homo sapiens GN=MAPK12 PE=1 SV=3                                   |           | 43.93   |
| P53779                 | MK10_HUMAN Mitogen-activated protein kinase 10 OS=Homo sapiens GN=MAPK10 PE=1 SV=2                                   |           | 41.33   |
| P53779-2               | MK10_HUMAN Isoform Alpha-1 of Mitogen-activated protein kinase 10 OS=Homo sapiens GN=MAPK10                          |           | 41.33   |
| P53779;A8MTD8;P53779-  | MK10_HUMAN Mitogen-activated protein kinase 10 OS=Homo sapiens GN=MAPK10 PE=1 SV=2;>tr A8MTD8 A8MTD8_HUMAN Unchar    | 1.35E-06  |         |
| P53801                 | PTTG_HUMAN Pituitary tumor-transforming gene 1 protein-interacting protein OS=Homo sapiens GN=PTTG1IP PE=1 SV=1      |           | 94.88   |
| P53803                 | RPAB4_HUMAN DNA-directed RNA polymerases I, II, and III subunit RPABC4 OS=Homo sapiens GN=POLR2K PE=2 SV=1           |           |         |
| P53814                 | SMTN_HUMAN Smoothelin OS=Homo sapiens GN=SMTN PE=1 SV=7                                                              |           | 24.71   |
| P53814-2               | SMTN_HUMAN Isoform A of Smoothelin OS=Homo sapiens GN=SMTN                                                           |           | 24.71   |
| P53814-5               | SMTN_HUMAN Isoform B2 of Smoothelin OS=Homo sapiens GN=SMTN                                                          |           | 24.71   |
| P53814-6               | SMTN_HUMAN Isoform B3 of Smoothelin OS=Homo sapiens GN=SMTN                                                          |           | 24.71   |
| P53985                 | MOT1_HUMAN Monocarboxylate transporter 1 OS=Homo sapiens GN=SLC16A1 PE=1 SV=3                                        | 2.56E-14  |         |
| P53990-4;P53990;P53990 | 4 IST1_HUMAN Isoform 4 of IST1 homolog OS=Homo sapiens GN=KIAA0174;>sp P53990 IST1_HUMAN IST1 homolog OS=Homo sap    | 1.79E-15  |         |
| P53992                 | SC24C_HUMAN Protein transport protein Sec24C OS=Homo sapiens GN=SEC24C PE=1 SV=3                                     |           |         |
| P53999                 | TCP4_HUMAN Activated RNA polymerase II transcriptional coactivator p15 OS=Homo sapiens GN=SUB1 PE=1 SV=3             |           | 272.55  |
| P54105                 | ICLN_HUMAN Methylosome subunit pICln OS=Homo sapiens GN=CLNS1A PE=1 SV=1                                             | 1.64E-97  |         |
| P54132                 | BLM_HUMAN Bloom syndrome protein OS=Homo sapiens GN=BLM PE=1 SV=1                                                    |           |         |
| P54136                 | SYRC_HUMAN Arginyl-tRNA synthetase, cytoplasmic OS=Homo sapiens GN=RARS PE=1 SV=2                                    |           | 1114.41 |
| P54136-2               | SYRC_HUMAN Isoform Monomeric of Arginyl-tRNA synthetase, cytoplasmic OS=Homo sapiens GN=RARS                         |           | 1057.53 |
| P54136;P54136-2        | SYRC_HUMAN Arginyl-tRNA synthetase, cytoplasmic OS=Homo sapiens GN=RARS PE=1 SV=2;>sp P54136-2 SYRC_HUMAN Isoform f  | 0         |         |
| P54277                 | PMS1_HUMAN PMS1 protein homolog 1 OS=Homo sapiens GN=PMS1 PE=1 SV=1                                                  |           |         |
| P54289                 | CA2D1_HUMAN Voltage-dependent calcium channel subunit alpha-2/delta-1 OS=Homo sapiens GN=CACNA2D1 PE=1 SV=3          |           |         |
| P54289-2               | CA2D1_HUMAN Isoform 2 of Voltage-dependent calcium channel subunit alpha-2/delta-1 OS=Homo sapiens GN=CACNA2D1       |           |         |
| P54289-3               | CA2D1_HUMAN Isoform 3 of Voltage-dependent calcium channel subunit alpha-2/delta-1 OS=Homo sapiens GN=CACNA2D1       |           |         |
| P54289-4               | CA2D1_HUMAN Isoform 4 of Voltage-dependent calcium channel subunit alpha-2/delta-1 OS=Homo sapiens GN=CACNA2D1       |           |         |
| P54289-5               | CA2D1_HUMAN Isoform 5 of Voltage-dependent calcium channel subunit alpha-2/delta-1 OS=Homo sapiens GN=CACNA2D1       |           |         |
| P54296                 | MYOM2_HUMAN Myomesin-2 OS=Homo sapiens GN=MYOM2 PE=2 SV=2                                                            | 7.14E-11  |         |
| P54577                 | SYYC_HUMAN Tyrosyl-tRNA synthetase, cytoplasmic OS=Homo sapiens GN=YARS PE=1 SV=4                                    |           | 489.1   |
| P54578                 | UBP14_HUMAN Ubiquitin carboxyl-terminal hydrolase 14 OS=Homo sapiens GN=USP14 PE=1 SV=3                              |           | 74.34   |
| P54619                 | AAKG1_HUMAN 5-AMP-activated protein kinase subunit gamma-1 OS=Homo sapiens GN=PRKAG1 PE=1 SV=1                       | 1.92E-07  |         |
| P54652                 | HSP72_HUMAN Heat shock-related 70 kDa protein 2 OS=Homo sapiens GN=HSPA2 PE=1 SV=1                                   |           | 697.05  |
| P54687                 | BCAT1_HUMAN Branched-chain-amino-acid aminotransferase, cytosolic OS=Homo sapiens GN=BCAT1 PE=1 SV=3                 | 2.71E-158 |         |
| P54707                 | AT12A_HUMAN Potassium-transporting ATPase alpha chain 2 OS=Homo sapiens GN=ATP12A PE=2 SV=3                          |           | 289.58  |

|                            |                                                                                                                        |           |          |
|----------------------------|------------------------------------------------------------------------------------------------------------------------|-----------|----------|
| P54707-2                   | AT12A_HUMAN Isoform 2 of Potassium-transporting ATPase alpha chain 2 OS=Homo sapiens GN=ATP12A                         |           | 289.58   |
| P54709                     | AT1B3_HUMAN Sodium/potassium-transporting ATPase subunit beta-3 OS=Homo sapiens GN=ATP1B3 PE=1 SV=1                    |           | 348.91   |
| P54725                     | RD23A_HUMAN UV excision repair protein RAD23 homolog A OS=Homo sapiens GN=RAD23A PE=1 SV=1                             | 7.49E-62  |          |
| P54727                     | RD23B_HUMAN UV excision repair protein RAD23 homolog B OS=Homo sapiens GN=RAD23B PE=1 SV=1                             |           |          |
| P54753                     | EPHB3_HUMAN Ephrin type-B receptor 3 OS=Homo sapiens GN=EPHB3 PE=1 SV=2                                                |           | 92.5     |
| P54756                     | EPHA5_HUMAN Ephrin type-A receptor 5 OS=Homo sapiens GN=EPHA5 PE=1 SV=3                                                |           | 40.71    |
| P54756-2                   | EPHA5_HUMAN Isoform 2 of Ephrin type-A receptor 5 OS=Homo sapiens GN=EPHA5                                             |           | 40.71    |
| P54756-3                   | EPHA5_HUMAN Isoform 3 of Ephrin type-A receptor 5 OS=Homo sapiens GN=EPHA5                                             |           | 40.71    |
| P54760                     | EPHB4_HUMAN Ephrin type-B receptor 4 OS=Homo sapiens GN=EPHB4 PE=1 SV=2                                                |           | 102.7    |
| P54762                     | EPHB1_HUMAN Ephrin type-B receptor 1 OS=Homo sapiens GN=EPHB1 PE=1 SV=1                                                |           | 103.85   |
| P54764                     | EPHA4_HUMAN Ephrin type-A receptor 4 OS=Homo sapiens GN=EPHA4 PE=1 SV=1                                                |           | 49.98    |
| P54802                     | ANAG_HUMAN Alpha-N-acetylglucosaminidase OS=Homo sapiens GN=NAGLU PE=1 SV=2                                            | 5.34E-06  |          |
| P54819                     | KAD2_HUMAN Adenylate kinase 2, mitochondrial OS=Homo sapiens GN=AK2 PE=1 SV=2                                          |           | 782.41   |
| P54819-2                   | KAD2_HUMAN Isoform 2 of Adenylate kinase 2, mitochondrial OS=Homo sapiens GN=AK2                                       |           | 782.41   |
| P54819-3                   | KAD2_HUMAN Isoform 3 of Adenylate kinase 2, mitochondrial OS=Homo sapiens GN=AK2                                       |           | 706.14   |
| P54819-4                   | KAD2_HUMAN Isoform 4 of Adenylate kinase 2, mitochondrial OS=Homo sapiens GN=AK2                                       |           | 584.22   |
| P54819-5                   | KAD2_HUMAN Isoform 5 of Adenylate kinase 2, mitochondrial OS=Homo sapiens GN=AK2                                       |           | 723.99   |
| P54819-6                   | KAD2_HUMAN Isoform 6 of Adenylate kinase 2, mitochondrial OS=Homo sapiens GN=AK2                                       |           | 665.53   |
| P54819;P54819-2;P54819-3   | KAD2_HUMAN Adenylate kinase 2, mitochondrial OS=Homo sapiens GN=AK2 PE=1 SV=2;>sp P54819-2 KAD2_HUMAN Isoform 2 of A   | 3.26E-86  |          |
| P54821                     | PRRX1_HUMAN Paired mesoderm homeobox protein 1 OS=Homo sapiens GN=PRRX1 PE=2 SV=2                                      |           |          |
| P54821-2                   | PRRX1_HUMAN Isoform PMX1-A of Paired mesoderm homeobox protein 1 OS=Homo sapiens GN=PRRX1                              |           |          |
| P54852                     | EMP3_HUMAN Epithelial membrane protein 3 OS=Homo sapiens GN=EMP3 PE=2 SV=1                                             |           | 24.13    |
| P54868                     | HMC2_HUMAN Hydroxymethylglutaryl-CoA synthase, mitochondrial OS=Homo sapiens GN=HMGCS2 PE=1 SV=1                       |           |          |
| P54886                     | P5CS_HUMAN Delta-1-pyrroline-5-carboxylate synthase OS=Homo sapiens GN=ALDH18A1 PE=1 SV=2                              |           | 557.83   |
| P54886-2                   | P5CS_HUMAN Isoform Short of Delta-1-pyrroline-5-carboxylate synthase OS=Homo sapiens GN=ALDH18A1                       |           | 557.16   |
| P54886;P54886-2            | P5CS_HUMAN Delta-1-pyrroline-5-carboxylate synthase OS=Homo sapiens GN=ALDH18A1 PE=1 SV=2;>sp P54886-2 P5CS_HUMAN I    | 7.17E-133 |          |
| P54920                     | SNAH_HUMAN Alpha-soluble NSF attachment protein OS=Homo sapiens GN=NAPA PE=1 SV=3                                      |           | 45.35    |
| P55010                     | EIF5_HUMAN Eukaryotic translation initiation factor 5 OS=Homo sapiens GN=EIF5 PE=1 SV=2                                |           | 224.63   |
| P55011                     | S12A2_HUMAN Solute carrier family 12 member 2 OS=Homo sapiens GN=SLC12A2 PE=1 SV=1                                     |           |          |
| P55011-3                   | S12A2_HUMAN Isoform 2 of Solute carrier family 12 member 2 OS=Homo sapiens GN=SLC12A2                                  |           |          |
| P55011;P55011-3            | S12A2_HUMAN Solute carrier family 12 member 2 OS=Homo sapiens GN=SLC12A2 PE=1 SV=1;>sp P55011-3 S12A2_HUMAN Isoform    | 4.28E-05  |          |
| P55036                     | PSMD4_HUMAN 26S proteasome non-ATPase regulatory subunit 4 OS=Homo sapiens GN=PSMD4 PE=1 SV=1                          |           | 156.35   |
| P55036-2                   | PSMD4_HUMAN Isoform Rpn10E of 26S proteasome non-ATPase regulatory subunit 4 OS=Homo sapiens GN=PSMD4                  |           | 91.38    |
| P55036;P55036-2            | PSMD4_HUMAN 26S proteasome non-ATPase regulatory subunit 4 OS=Homo sapiens GN=PSMD4 PE=1 SV=1;>sp P55036-2 PSMD4_I     | 6.27E-41  |          |
| P55039                     | DRG2_HUMAN Developmentally-regulated GTP-binding protein 2 OS=Homo sapiens GN=DRG2 PE=1 SV=1                           |           | 2.89E-15 |
| P55058;P55058-2            | PLTP_HUMAN Phospholipid transfer protein OS=Homo sapiens GN=PLTP PE=1 SV=1;>sp P55058-2 PLTP_HUMAN Isoform 2 of Phosph | 6.26E-17  |          |
| P55060                     | XPO2_HUMAN Exportin-2 OS=Homo sapiens GN=CSE1L PE=1 SV=3                                                               |           | 469.45   |
| P55060-2                   | XPO2_HUMAN Isoform 2 of Exportin-2 OS=Homo sapiens GN=CSE1L                                                            |           | 57.18    |
| P55060-3                   | XPO2_HUMAN Isoform 3 of Exportin-2 OS=Homo sapiens GN=CSE1L                                                            |           | 469.45   |
| P55060;P55060-3            | XPO2_HUMAN Exportin-2 OS=Homo sapiens GN=CSE1L PE=1 SV=3;>sp P55060-3 XPO2_HUMAN Isoform 3 of Exportin-2 OS=Homo       | 0         |          |
| P55061                     | BI1_HUMAN Bax inhibitor 1 OS=Homo sapiens GN=TMBIM6 PE=1 SV=2                                                          |           |          |
| P55072                     | TERA_HUMAN Transitional endoplasmic reticulum ATPase OS=Homo sapiens GN=VCP PE=1 SV=4                                  |           | 1995.04  |
| P55081                     | MFAP1_HUMAN Microfibrillar-associated protein 1 OS=Homo sapiens GN=MFAP1 PE=1 SV=2                                     |           |          |
| P55083                     | MFAP4_HUMAN Microfibrillar-associated glycoprotein 4 OS=Homo sapiens GN=MFAP4 PE=1 SV=2                                | 1.32E-35  |          |
| P55084                     | ECHB_HUMAN Trifunctional enzyme subunit beta, mitochondrial OS=Homo sapiens GN=HADHB PE=1 SV=3                         |           | 397.65   |
| P55145                     | MANF_HUMAN Mesencephalic astrocyte-derived neurotrophic factor OS=Homo sapiens GN=MANF PE=1 SV=3                       |           | 800.32   |
| P55160                     | NCKPL_HUMAN Nck-associated protein 1-like OS=Homo sapiens GN=NCKAP1L PE=1 SV=3                                         | 7.74E-11  |          |
| P55196                     | AFAD_HUMAN Afadin OS=Homo sapiens GN=MLLT4 PE=1 SV=3                                                                   |           | 140.27   |
| P55196-1                   | AFAD_HUMAN Isoform 2 of Afadin OS=Homo sapiens GN=MLLT4                                                                |           | 136.87   |
| P55196-1;P55196-5;P55196-2 | AFAD_HUMAN Isoform 2 of Afadin OS=Homo sapiens GN=MLLT4;>sp P55196-5 AFAD_HUMAN Isoform 5 of Afadin OS=Homo sapier     | 9.19E-77  |          |
| P55196-2                   | AFAD_HUMAN Isoform 1 of Afadin OS=Homo sapiens GN=MLLT4                                                                |           | 136.87   |
| P55196-3                   | AFAD_HUMAN Isoform 3 of Afadin OS=Homo sapiens GN=MLLT4                                                                |           | 136.87   |
| P55196-5                   | AFAD_HUMAN Isoform 5 of Afadin OS=Homo sapiens GN=MLLT4                                                                |           | 136.87   |
| P55196-5;A8MQ02;P55196-6   | AFAD_HUMAN Isoform 5 of Afadin OS=Homo sapiens GN=MLLT4;>tr A8MQ02 A8MQ02_HUMAN Uncharacterized protein OS=Homo        | 2.37E-06  |          |
| P55196-6                   | AFAD_HUMAN Isoform 6 of Afadin OS=Homo sapiens GN=MLLT4                                                                |           | 140.27   |
| P55197                     | AF10_HUMAN Protein AF-10 OS=Homo sapiens GN=MLLT10 PE=1 SV=1                                                           |           |          |
| P55209                     | NP1L1_HUMAN Nucleosome assembly protein 1-like 1 OS=Homo sapiens GN=NAP1L1 PE=1 SV=1                                   |           | 149.53   |
| P55210                     | CASP7_HUMAN Caspase-7 OS=Homo sapiens GN=CASP7 PE=1 SV=1                                                               |           | 5.6      |
| P55210-2                   | CASP7_HUMAN Isoform Beta of Caspase-7 OS=Homo sapiens GN=CASP7                                                         |           | 67.81    |
| P55210-3                   | CASP7_HUMAN Isoform Alpha' of Caspase-7 OS=Homo sapiens GN=CASP7                                                       |           | 5.6      |
| P55212                     | CASP6_HUMAN Caspase-6 OS=Homo sapiens GN=CASP6 PE=1 SV=2                                                               | 9.02E-16  |          |

|                          |                                                                                                                              |           |        |
|--------------------------|------------------------------------------------------------------------------------------------------------------------------|-----------|--------|
| P55263                   | ADK_HUMAN Adenosine kinase OS=Homo sapiens GN=ADK PE=1 SV=2                                                                  |           | 51.93  |
| P55263-2                 | ADK_HUMAN Isoform Short of Adenosine kinase OS=Homo sapiens GN=ADK                                                           |           | 51.93  |
| P55263;P55263-2          | ADK_HUMAN Adenosine kinase OS=Homo sapiens GN=ADK PE=1 SV=2;>sp P55263-2 ADK_HUMAN Isoform Short of Adenosine kina:          | 1.03E-24  |        |
| P55265                   | DSRAD_HUMAN Double-stranded RNA-specific adenosine deaminase OS=Homo sapiens GN=ADAR PE=1 SV=4                               |           | 60.97  |
| P55265-2                 | DSRAD_HUMAN Isoform 2 of Double-stranded RNA-specific adenosine deaminase OS=Homo sapiens GN=ADAR                            |           | 60.97  |
| P55265-3                 | DSRAD_HUMAN Isoform 3 of Double-stranded RNA-specific adenosine deaminase OS=Homo sapiens GN=ADAR                            |           | 60.97  |
| P55265-4                 | DSRAD_HUMAN Isoform 4 of Double-stranded RNA-specific adenosine deaminase OS=Homo sapiens GN=ADAR                            |           | 60.97  |
| P55265-4;P55265;P55265-5 | 4 DSRAD_HUMAN Isoform 4 of Double-stranded RNA-specific adenosine deaminase OS=Homo sapiens GN=ADAR;>sp P55265 DSRAD         | 6.43E-255 |        |
| P55265-5                 | DSRAD_HUMAN Isoform 5 of Double-stranded RNA-specific adenosine deaminase OS=Homo sapiens GN=ADAR                            |           | 60.97  |
| P55268                   | LAMB2_HUMAN Laminin subunit beta-2 OS=Homo sapiens GN=LAMB2 PE=1 SV=2                                                        | 1.09E-174 |        |
| P55287;P55287-2          | CAD11_HUMAN Cadherin-11 OS=Homo sapiens GN=CDH11 PE=1 SV=2;>sp P55287-2 CAD11_HUMAN Isoform 2 of Cadherin-11 OS=             | 6.68E-05  |        |
| P55317                   | FOXA1_HUMAN Hepatocyte nuclear factor 3-alpha OS=Homo sapiens GN=FOXA1 PE=1 SV=2                                             |           |        |
| P55318                   | FOXA3_HUMAN Hepatocyte nuclear factor 3-gamma OS=Homo sapiens GN=FOXA3 PE=1 SV=2                                             |           |        |
| P55327-3;D0UFD1;D0UFD3   | 3 TPD52_HUMAN Isoform 3 of Tumor protein D52 OS=Homo sapiens GN=TPD52;>tr D0UFD1 D0UFD1_HUMAN Prostate leucine zipper        | 2.01E-123 |        |
| P55735                   | SEC13_HUMAN Protein SEC13 homolog OS=Homo sapiens GN=SEC13 PE=1 SV=3                                                         | 3.58E-196 |        |
| P55769                   | NH2L1_HUMAN NHP2-like protein 1 OS=Homo sapiens GN=NHP2L1 PE=1 SV=3                                                          |           | 101.79 |
| P55786                   | PSA_HUMAN Puromycin-sensitive aminopeptidase OS=Homo sapiens GN=NPEPPS PE=1 SV=2                                             |           | 72.31  |
| P55795                   | HNRH2_HUMAN Heterogeneous nuclear ribonucleoprotein H2 OS=Homo sapiens GN=HNRNPH2 PE=1 SV=1                                  |           | 416.42 |
| P55809                   | SCOT1_HUMAN Succinyl-CoA:3-ketoacid-coenzyme A transferase 1, mitochondrial OS=Homo sapiens GN=OXCT1 PE=1 SV=1               |           |        |
| P55822                   | SH3BG_HUMAN SH3 domain-binding glutamic acid-rich protein OS=Homo sapiens GN=SH3BGR PE=1 SV=3                                | 3.59E-05  |        |
| P55854                   | SUMO3_HUMAN Small ubiquitin-related modifier 3 OS=Homo sapiens GN=SUMO3 PE=1 SV=2                                            |           | 110.85 |
| P55884                   | EIF3B_HUMAN Eukaryotic translation initiation factor 3 subunit B OS=Homo sapiens GN=EIF3B PE=1 SV=3                          |           | 590.37 |
| P55884-2                 | EIF3B_HUMAN Isoform 2 of Eukaryotic translation initiation factor 3 subunit B OS=Homo sapiens GN=EIF3B                       |           | 590.37 |
| P55884-2;P55884          | 2 EIF3B_HUMAN Isoform 2 of Eukaryotic translation initiation factor 3 subunit B OS=Homo sapiens GN=EIF3B;>sp P55884 EIF3B_HU | 4.47E-182 |        |
| P55899                   | FCGRN_HUMAN IgG receptor FcRn large subunit p51 OS=Homo sapiens GN=FCGRT PE=1 SV=1                                           |           | 24.98  |
| P55957                   | BID_HUMAN BH3-interacting domain death agonist OS=Homo sapiens GN=BID PE=1 SV=1                                              |           | 163.03 |
| P55957-2                 | BID_HUMAN Isoform 2 of BH3-interacting domain death agonist OS=Homo sapiens GN=BID                                           |           | 163.03 |
| P55957-2;P55957          | 2 BID_HUMAN Isoform 2 of BH3-interacting domain death agonist OS=Homo sapiens GN=BID;>sp P55957 BID_HUMAN BH3-interacti      | 3.89E-21  |        |
| P55957-4                 | BID_HUMAN Isoform 4 of BH3-interacting domain death agonist OS=Homo sapiens GN=BID                                           |           | 64.37  |
| P56134                   | ATPK_HUMAN ATP synthase subunit f, mitochondrial OS=Homo sapiens GN=ATP5J2 PE=1 SV=3                                         |           | 82.43  |
| P56134-2                 | ATPK_HUMAN Isoform 2 of ATP synthase subunit f, mitochondrial OS=Homo sapiens GN=ATP5J2                                      |           | 82.43  |
| P56134;P56134-2          | ATPK_HUMAN ATP synthase subunit f, mitochondrial OS=Homo sapiens GN=ATP5J2 PE=1 SV=3;>sp P56134-2 ATPK_HUMAN Isoform         | 5.98E-20  |        |
| P56159                   | GFRA1_HUMAN GDNF family receptor alpha-1 OS=Homo sapiens GN=GFRA1 PE=2 SV=2                                                  |           |        |
| P56159-2                 | GFRA1_HUMAN Isoform 2 of GDNF family receptor alpha-1 OS=Homo sapiens GN=GFRA1                                               |           |        |
| P56159-2;P56159          | 2 GFRA1_HUMAN Isoform 2 of GDNF family receptor alpha-1 OS=Homo sapiens GN=GFRA1;>sp P56159 GFRA1_HUMAN GDNF family          | 2.09E-221 |        |
| P56181                   | NDUV3_HUMAN NADH dehydrogenase [ubiquinone] flavoprotein 3, mitochondrial OS=Homo sapiens GN=NDUFV3 PE=1 SV=2                |           | 32.95  |
| P56181-2                 | NDUV3_HUMAN Isoform 2 of NADH dehydrogenase [ubiquinone] flavoprotein 3, mitochondrial OS=Homo sapiens GN=NDUFV3             |           | 31.12  |
| P56182                   | RRP1_HUMAN Ribosomal RNA processing protein 1 homolog A OS=Homo sapiens GN=RRP1 PE=1 SV=1                                    |           |        |
| P56192                   | SYMC_HUMAN Methionyl-tRNA synthetase, cytoplasmic OS=Homo sapiens GN=MARS PE=1 SV=2                                          |           | 442.18 |
| P56199                   | ITA1_HUMAN Integrin alpha-1 OS=Homo sapiens GN=ITGA1 PE=1 SV=2                                                               | 2.43E-10  |        |
| P56211;P56211-2          | ARP19_HUMAN cAMP-regulated phosphoprotein 19 OS=Homo sapiens GN=ARPP19 PE=1 SV=2;>sp P56211-2 ARP19_HUMAN Isoform            | 9.88E-09  |        |
| P56270                   | MAZ_HUMAN Myc-associated zinc finger protein OS=Homo sapiens GN=MAZ PE=1 SV=1                                                |           |        |
| P56279                   | TCL1A_HUMAN T-cell leukemia/lymphoma protein 1A OS=Homo sapiens GN=TCL1A PE=1 SV=1                                           | 4.46E-67  |        |
| P56377                   | AP1S2_HUMAN AP-1 complex subunit sigma-2 OS=Homo sapiens GN=AP1S2 PE=1 SV=1                                                  |           |        |
| P56378                   | 68MP_HUMAN 6.8 kDa mitochondrial proteolipid OS=Homo sapiens GN=MP68 PE=1 SV=1                                               |           | 29.91  |
| P56381                   | ATP5E_HUMAN ATP synthase subunit epsilon, mitochondrial OS=Homo sapiens GN=ATP5E PE=1 SV=2                                   |           |        |
| P56385                   | ATP5I_HUMAN ATP synthase subunit e, mitochondrial OS=Homo sapiens GN=ATP5I PE=1 SV=2                                         |           | 43.4   |
| P56524                   | HDAC4_HUMAN Histone deacetylase 4 OS=Homo sapiens GN=HDAC4 PE=1 SV=3                                                         |           |        |
| P56537                   | IF6_HUMAN Eukaryotic translation initiation factor 6 OS=Homo sapiens GN=EIF6 PE=1 SV=1                                       |           | 548.09 |
| P56539                   | CAV3_HUMAN Caveolin-3 OS=Homo sapiens GN=CAV3 PE=1 SV=1                                                                      |           | 57.05  |
| P56545                   | CTBP2_HUMAN C-terminal-binding protein 2 OS=Homo sapiens GN=CTBP2 PE=1 SV=1                                                  |           |        |
| P56545-2                 | CTBP2_HUMAN Isoform 2 of C-terminal-binding protein 2 OS=Homo sapiens GN=CTBP2                                               |           |        |
| P56545-2;P56545          | 2 CTBP2_HUMAN Isoform 2 of C-terminal-binding protein 2 OS=Homo sapiens GN=CTBP2;>sp P56545 CTBP2_HUMAN C-terminal-bin       | 2.92E-22  |        |
| P56556                   | NDUA6_HUMAN NADH dehydrogenase [ubiquinone] 1 alpha subcomplex subunit 6 OS=Homo sapiens GN=NDUFA6 PE=1 SV=3                 |           | 54.91  |
| P56747                   | CLD6_HUMAN Claudin-6 OS=Homo sapiens GN=CLDN6 PE=1 SV=2                                                                      |           | 79.62  |
| P56962                   | STX17_HUMAN Syntaxin-17 OS=Homo sapiens GN=STX17 PE=1 SV=2                                                                   | 6.84E-06  |        |
| P57053                   | H2BFS_HUMAN Histone H2B type F-S OS=Homo sapiens GN=H2BFS PE=1 SV=2                                                          |           | 700.06 |
| P57059                   | SIK1_HUMAN Serine/threonine-protein kinase SIK1 OS=Homo sapiens GN=SIK1 PE=1 SV=2                                            |           | 18.52  |
| P57081                   | WDR4_HUMAN tRNA (guanine-N(7)-)-methyltransferase subunit WDR4 OS=Homo sapiens GN=WDR4 PE=1 SV=2                             |           |        |
| P57081-2                 | WDR4_HUMAN Isoform 2 of tRNA (guanine-N(7)-)-methyltransferase subunit WDR4 OS=Homo sapiens GN=WDR4                          |           |        |
| P57081-3                 | WDR4_HUMAN Isoform 3 of tRNA (guanine-N(7)-)-methyltransferase subunit WDR4 OS=Homo sapiens GN=WDR4                          |           |        |

|                        |                                                                                                                       |           |         |
|------------------------|-----------------------------------------------------------------------------------------------------------------------|-----------|---------|
| P57088                 | TMM33_HUMAN Transmembrane protein 33 OS=Homo sapiens GN=TMEM33 PE=1 SV=2                                              |           | 255.42  |
| P57105                 | SYJ2B_HUMAN Synaptojanin-2-binding protein OS=Homo sapiens GN=SYNJ2BP PE=1 SV=2                                       |           | 37.11   |
| P57678                 | GEM14_HUMAN Component of gems 4 OS=Homo sapiens GN=GEMIN4 PE=1 SV=2                                                   | 8.55E-11  |         |
| P57721                 | PCBP3_HUMAN Poly(rC)-binding protein 3 OS=Homo sapiens GN=PCBP3 PE=1 SV=2                                             |           | 116.51  |
| P57721-2               | PCBP3_HUMAN Isoform 2 of Poly(rC)-binding protein 3 OS=Homo sapiens GN=PCBP3                                          |           | 116.51  |
| P57721-3               | PCBP3_HUMAN Isoform 3 of Poly(rC)-binding protein 3 OS=Homo sapiens GN=PCBP3                                          |           | 116.51  |
| P57721-4               | PCBP3_HUMAN Isoform 4 of Poly(rC)-binding protein 3 OS=Homo sapiens GN=PCBP3                                          |           | 116.51  |
| P57721-5               | PCBP3_HUMAN Isoform 5 of Poly(rC)-binding protein 3 OS=Homo sapiens GN=PCBP3                                          |           | 116.51  |
| P57721;P57721-4;P57721 | PCBP3_HUMAN Poly(rC)-binding protein 3 OS=Homo sapiens GN=PCBP3 PE=1 SV=2;>sp P57721-4 PCBP3_HUMAN Isoform 4 of Poly( | 3.37E-84  |         |
| P57723                 | PCBP4_HUMAN Poly(rC)-binding protein 4 OS=Homo sapiens GN=PCBP4 PE=2 SV=1                                             |           | 7.97    |
| P57723-2               | PCBP4_HUMAN Isoform 2 of Poly(rC)-binding protein 4 OS=Homo sapiens GN=PCBP4                                          |           | 7.97    |
| P57735                 | RAB25_HUMAN Ras-related protein Rab-25 OS=Homo sapiens GN=RAB25 PE=1 SV=2                                             |           | 67.49   |
| P57737;B4DFD6;B4DKU9;  | CORO7_HUMAN Coronin-7 OS=Homo sapiens GN=CORO7 PE=1 SV=2;>tr B4DFD6 B4DFD6_HUMAN cDNA FLJ54091, highly similar to     | 5.31E-29  |         |
| P57740                 | NU107_HUMAN Nuclear pore complex protein Nup107 OS=Homo sapiens GN=NUP107 PE=1 SV=1                                   |           |         |
| P57764                 | GSDMD_HUMAN Gasdermin-D OS=Homo sapiens GN=GSDMD PE=1 SV=1                                                            | 4.05E-07  |         |
| P57772                 | SELB_HUMAN Selenocysteine-specific elongation factor OS=Homo sapiens GN=EEFSEC PE=1 SV=4                              | 4.22E-14  |         |
| P57796                 | CABP4_HUMAN Calcium-binding protein 4 OS=Homo sapiens GN=CABP4 PE=1 SV=2                                              |           |         |
| P57796-2               | CABP4_HUMAN Isoform 2 of Calcium-binding protein 4 OS=Homo sapiens GN=CABP4                                           |           |         |
| P58107                 | EPIPL_HUMAN Epiplakin OS=Homo sapiens GN=EPPK1 PE=1 SV=2                                                              |           | 399.76  |
| P58304                 | VSX2_HUMAN Visual system homeobox 2 OS=Homo sapiens GN=VSX2 PE=1 SV=1                                                 |           |         |
| P58335                 | ANTR2_HUMAN Anthrax toxin receptor 2 OS=Homo sapiens GN=ANTXR2 PE=1 SV=5                                              |           | 22.7    |
| P58335-2               | ANTR2_HUMAN Isoform 2 of Anthrax toxin receptor 2 OS=Homo sapiens GN=ANTXR2                                           |           | 22.7    |
| P58335-3               | ANTR2_HUMAN Isoform 3 of Anthrax toxin receptor 2 OS=Homo sapiens GN=ANTXR2                                           |           | 2.83    |
| P58335-4               | ANTR2_HUMAN Isoform 4 of Anthrax toxin receptor 2 OS=Homo sapiens GN=ANTXR2                                           |           | 22.7    |
| P58335;P58335-4;A4FUA5 | ANTR2_HUMAN Anthrax toxin receptor 2 OS=Homo sapiens GN=ANTXR2 PE=1 SV=5;>sp P58335-4 ANTR2_HUMAN Isoform 4 of Antl   | 6.29E-05  |         |
| P58546                 | MTPN_HUMAN Myotrophin OS=Homo sapiens GN=MTPN PE=1 SV=2                                                               |           | 273.83  |
| P58876                 | H2B1D_HUMAN Histone H2B type 1-D OS=Homo sapiens GN=HIST1H2BD PE=1 SV=2                                               |           | 705.5   |
| P59045;P59045-2;P59045 | NAL11_HUMAN NACHT, LRR and PYD domains-containing protein 11 OS=Homo sapiens GN=NLRP11 PE=2 SV=2;>sp P59045-2 NAL11   | 2.83E-10  |         |
| P59074                 | CG301_HUMAN Putative protein CGI-301 OS=Homo sapiens GN=CGI-301 PE=5 SV=1                                             |           |         |
| P59190                 | RAB15_HUMAN Ras-related protein Rab-15 OS=Homo sapiens GN=RAB15 PE=1 SV=1                                             |           | 158.68  |
| P59190-2               | RAB15_HUMAN Isoform 2 of Ras-related protein Rab-15 OS=Homo sapiens GN=RAB15                                          |           | 143.66  |
| P59665;P59666          | DEF1_HUMAN Neutrophil defensin 1 OS=Homo sapiens GN=DEFA1 PE=1 SV=1;>sp P59666 DEF3_HUMAN Neutrophil defensin 3 OS=   | 6.64E-17  |         |
| P59780                 | AP3S2_HUMAN AP-3 complex subunit sigma-2 OS=Homo sapiens GN=AP3S2 PE=2 SV=1                                           | 3.06E-10  |         |
| P59998                 | ARPC4_HUMAN Actin-related protein 2/3 complex subunit 4 OS=Homo sapiens GN=ARPC4 PE=1 SV=3                            |           | 345.63  |
| P60033                 | CD81_HUMAN CD81 antigen OS=Homo sapiens GN=CD81 PE=1 SV=1                                                             |           | 39.17   |
| P60059                 | SC61G_HUMAN Protein transport protein Sec61 subunit gamma OS=Homo sapiens GN=SEC61G PE=2 SV=1                         |           | 13.95   |
| P60174                 | TPIS_HUMAN Triosephosphate isomerase OS=Homo sapiens GN=TPI1 PE=1 SV=2                                                |           | 1372.48 |
| P60174-2               | TPIS_HUMAN Isoform 2 of Triosephosphate isomerase OS=Homo sapiens GN=TPI1                                             |           | 1018.64 |
| P60174;P60174-2        | TPIS_HUMAN Triosephosphate isomerase OS=Homo sapiens GN=TPI1 PE=1 SV=2;>sp P60174-2 TPIS_HUMAN Isoform 2 of Triosephc | 0         |         |
| P60228                 | EIF3E_HUMAN Eukaryotic translation initiation factor 3 subunit E OS=Homo sapiens GN=EIF3E PE=1 SV=1                   |           | 462.9   |
| P60468                 | SC61B_HUMAN Protein transport protein Sec61 subunit beta OS=Homo sapiens GN=SEC61B PE=1 SV=2                          |           | 195.48  |
| P60510                 | PP4C_HUMAN Serine/threonine-protein phosphatase 4 catalytic subunit OS=Homo sapiens GN=PPP4C PE=1 SV=1                |           | 143.36  |
| P60520                 | GBRL2_HUMAN Gamma-aminobutyric acid receptor-associated protein-like 2 OS=Homo sapiens GN=GABARAPL2 PE=1 SV=1         |           |         |
| P60602                 | ROMO1_HUMAN Reactive oxygen species modulator 1 OS=Homo sapiens GN=ROMO1 PE=1 SV=1                                    |           | 31.07   |
| P60602-2               | ROMO1_HUMAN Isoform 2 of Reactive oxygen species modulator 1 OS=Homo sapiens GN=ROMO1                                 |           | 31.07   |
| P60604                 | UB2G2_HUMAN Ubiquitin-conjugating enzyme E2 G2 OS=Homo sapiens GN=UBE2G2 PE=1 SV=1                                    | 1.64E-08  |         |
| P60660                 | MYL6_HUMAN Myosin light polypeptide 6 OS=Homo sapiens GN=MYL6 PE=1 SV=2                                               |           | 774.11  |
| P60660-2               | MYL6_HUMAN Isoform Smooth muscle of Myosin light polypeptide 6 OS=Homo sapiens GN=MYL6                                |           | 840.94  |
| P60660;P60660-2        | MYL6_HUMAN Myosin light polypeptide 6 OS=Homo sapiens GN=MYL6 PE=1 SV=2;>sp P60660-2 MYL6_HUMAN Isoform Smooth mus    | 1.98E-158 |         |
| P60709                 | ACTB_HUMAN Actin, cytoplasmic 1 OS=Homo sapiens GN=ACTB PE=1 SV=1                                                     |           | 2352.17 |
| P60763                 | RAC3_HUMAN Ras-related C3 botulinum toxin substrate 3 OS=Homo sapiens GN=RAC3 PE=1 SV=1                               |           | 241.21  |
| P60842                 | IF4A1_HUMAN Eukaryotic initiation factor 4A-I OS=Homo sapiens GN=EIF4A1 PE=1 SV=1                                     |           | 1103.33 |
| P60866                 | RS20_HUMAN 40S ribosomal protein S20 OS=Homo sapiens GN=RPS20 PE=1 SV=1                                               |           | 334.69  |
| P60891                 | PRPS1_HUMAN Ribose-phosphate pyrophosphokinase 1 OS=Homo sapiens GN=PRPS1 PE=1 SV=2                                   |           | 39.32   |
| P60900                 | PSA6_HUMAN Proteasome subunit alpha type-6 OS=Homo sapiens GN=PSMA6 PE=1 SV=1                                         |           | 675.45  |
| P60903                 | S10AA_HUMAN Protein S100-A10 OS=Homo sapiens GN=S100A10 PE=1 SV=2                                                     |           | 424.1   |
| P60953                 | CDC42_HUMAN Cell division control protein 42 homolog OS=Homo sapiens GN=CDC42 PE=1 SV=2                               |           | 382.73  |
| P60953-1               | CDC42_HUMAN Isoform 1 of Cell division control protein 42 homolog OS=Homo sapiens GN=CDC42                            |           | 216.04  |
| P60953;P60953-1        | CDC42_HUMAN Cell division control protein 42 homolog OS=Homo sapiens GN=CDC42 PE=1 SV=2;>sp P60953-1 CDC42_HUMAN Isc  | 3.90E-81  |         |
| P60981                 | DEST_HUMAN Destrin OS=Homo sapiens GN=DSTN PE=1 SV=3                                                                  |           | 150.71  |
| P60983                 | GMFB_HUMAN Glia maturation factor beta OS=Homo sapiens GN=GMFB PE=1 SV=2                                              |           | 38.53   |



|                         |                                                                                                                         |          |         |
|-------------------------|-------------------------------------------------------------------------------------------------------------------------|----------|---------|
| P61006                  | RAB8A_HUMAN Ras-related protein Rab-8A OS=Homo sapiens GN=RAB8A PE=1 SV=1                                               |          | 648.89  |
| P61009                  | SPCS3_HUMAN Signal peptidase complex subunit 3 OS=Homo sapiens GN=SPCS3 PE=1 SV=1                                       |          | 152.05  |
| P61011                  | SRP54_HUMAN Signal recognition particle 54 kDa protein OS=Homo sapiens GN=SRP54 PE=1 SV=1                               |          | 245.3   |
| P61018                  | RAB4B_HUMAN Ras-related protein Rab-4B OS=Homo sapiens GN=RAB4B PE=1 SV=1                                               |          | 103.32  |
| P61018-2                | RAB4B_HUMAN Isoform 2 of Ras-related protein Rab-4B OS=Homo sapiens GN=RAB4B                                            |          | 103.32  |
| P61018-2;P61018;Q6PIK3  | 2 RAB4B_HUMAN Isoform 2 of Ras-related protein Rab-4B OS=Homo sapiens GN=RAB4B;>sp P61018 RAB4B_HUMAN Ras-related prc   | 2.33E-07 |         |
| P61018;P61018-2         | RAB4B_HUMAN Ras-related protein Rab-4B OS=Homo sapiens GN=RAB4B PE=1 SV=1;>sp P61018-2 RAB4B_HUMAN Isoform 2 of Ra      | 3.12E-07 |         |
| P61019                  | RAB2A_HUMAN Ras-related protein Rab-2A OS=Homo sapiens GN=RAB2A PE=1 SV=1                                               |          | 637.4   |
| P61020                  | RAB5B_HUMAN Ras-related protein Rab-5B OS=Homo sapiens GN=RAB5B PE=1 SV=1                                               |          | 490.89  |
| P61024                  | CKS1_HUMAN Cyclin-dependent kinases regulatory subunit 1 OS=Homo sapiens GN=CKS1B PE=1 SV=1                             |          | 65.91   |
| P61026                  | RAB10_HUMAN Ras-related protein Rab-10 OS=Homo sapiens GN=RAB10 PE=1 SV=1                                               |          | 535.49  |
| P61073-2;P61073         | 2 CXCR4_HUMAN Isoform 2 of C-X-C chemokine receptor type 4 OS=Homo sapiens GN=CXCR4;>sp P61073 CXCR4_HUMAN C-X-C ch     | 3.27E-15 |         |
| P61077                  | UB2D3_HUMAN Ubiquitin-conjugating enzyme E2 D3 OS=Homo sapiens GN=UBE2D3 PE=1 SV=1                                      |          | 28.74   |
| P61077-2                | UB2D3_HUMAN Isoform 2 of Ubiquitin-conjugating enzyme E2 D3 OS=Homo sapiens GN=UBE2D3                                   |          | 28.74   |
| P61077-2;P61077;P61077  | 2 UB2D3_HUMAN Isoform 2 of Ubiquitin-conjugating enzyme E2 D3 OS=Homo sapiens GN=UBE2D3;>sp P61077 UB2D3_HUMAN Ubi      | 5.30E-18 |         |
| P61077-3                | UB2D3_HUMAN Isoform 3 of Ubiquitin-conjugating enzyme E2 D3 OS=Homo sapiens GN=UBE2D3                                   |          | 28.74   |
| P61077-3;P61077-2;D3DC3 | 3 UB2D3_HUMAN Isoform 3 of Ubiquitin-conjugating enzyme E2 D3 OS=Homo sapiens GN=UBE2D3;>sp P61077-2 UB2D3_HUMAN Is     | 2.28E-11 |         |
| P61081                  | UBC12_HUMAN NEDD8-conjugating enzyme Ubc12 OS=Homo sapiens GN=UBE2M PE=1 SV=1                                           |          | 153.22  |
| P61086                  | UBE2K_HUMAN Ubiquitin-conjugating enzyme E2 K OS=Homo sapiens GN=UBE2K PE=1 SV=3                                        |          | 159.75  |
| P61086-2                | UBE2K_HUMAN Isoform 2 of Ubiquitin-conjugating enzyme E2 K OS=Homo sapiens GN=UBE2K                                     |          | 63.06   |
| P61086;B4DIZ2;C9JGP1;C  | UBE2K_HUMAN Ubiquitin-conjugating enzyme E2 K OS=Homo sapiens GN=UBE2K PE=1 SV=3;>tr B4DIZ2 B4DIZ2_HUMAN cDNA FLJ       | 9.89E-31 |         |
| P61088                  | UBE2N_HUMAN Ubiquitin-conjugating enzyme E2 N OS=Homo sapiens GN=UBE2N PE=1 SV=1                                        |          | 351.72  |
| P61106                  | RAB14_HUMAN Ras-related protein Rab-14 OS=Homo sapiens GN=RAB14 PE=1 SV=4                                               |          | 601.41  |
| P61158                  | ARP3_HUMAN Actin-related protein 3 OS=Homo sapiens GN=ACTR3 PE=1 SV=3                                                   |          | 402.51  |
| P61160                  | ARP2_HUMAN Actin-related protein 2 OS=Homo sapiens GN=ACTR2 PE=1 SV=1                                                   |          | 426.29  |
| P61163                  | ACTZ_HUMAN Alpha-centractin OS=Homo sapiens GN=ACTR1A PE=1 SV=1                                                         |          | 267.5   |
| P61201                  | CSN2_HUMAN COP9 signalosome complex subunit 2 OS=Homo sapiens GN=COPS2 PE=1 SV=1                                        |          | 83.64   |
| P61201-2                | CSN2_HUMAN Isoform 2 of COP9 signalosome complex subunit 2 OS=Homo sapiens GN=COPS2                                     |          | 83.64   |
| P61201-2;P61201         | 2 CSN2_HUMAN Isoform 2 of COP9 signalosome complex subunit 2 OS=Homo sapiens GN=COPS2;>sp P61201 CSN2_HUMAN COP9 s      | 8.36E-51 |         |
| P61204                  | ARF3_HUMAN ADP-ribosylation factor 3 OS=Homo sapiens GN=ARF3 PE=1 SV=2                                                  |          | 848.68  |
| P61218                  | RPAB2_HUMAN DNA-directed RNA polymerases I, II, and III subunit RPABC2 OS=Homo sapiens GN=POLR2F PE=1 SV=1              |          | 26.99   |
| P61221                  | ABCE1_HUMAN ATP-binding cassette sub-family E member 1 OS=Homo sapiens GN=ABCE1 PE=1 SV=1                               |          | 621.03  |
| P61224                  | RAP1B_HUMAN Ras-related protein Rap-1b OS=Homo sapiens GN=RAP1B PE=1 SV=1                                               |          | 648.23  |
| P61225                  | RAP2B_HUMAN Ras-related protein Rap-2b OS=Homo sapiens GN=RAP2B PE=1 SV=1                                               |          | 271.79  |
| P61244                  | MAX_HUMAN Protein max OS=Homo sapiens GN=MAX PE=1 SV=1                                                                  |          | 43.65   |
| P61244-2                | MAX_HUMAN Isoform 2 of Protein max OS=Homo sapiens GN=MAX                                                               |          | 43.65   |
| P61244-3                | MAX_HUMAN Isoform 3 of Protein max OS=Homo sapiens GN=MAX                                                               |          | 43.65   |
| P61247                  | RS3A_HUMAN 40S ribosomal protein S3a OS=Homo sapiens GN=RPS3A PE=1 SV=2                                                 |          | 1582.55 |
| P61254                  | RL26_HUMAN 60S ribosomal protein L26 OS=Homo sapiens GN=RPL26 PE=1 SV=1                                                 |          | 661.96  |
| P61289                  | PSME3_HUMAN Proteasome activator complex subunit 3 OS=Homo sapiens GN=PSME3 PE=1 SV=1                                   |          | 711.34  |
| P61289-2                | PSME3_HUMAN Isoform 2 of Proteasome activator complex subunit 3 OS=Homo sapiens GN=PSME3                                |          | 711.34  |
| P61289-2;P61289         | 2 PSME3_HUMAN Isoform 2 of Proteasome activator complex subunit 3 OS=Homo sapiens GN=PSME3;>sp P61289 PSME3_HUMAN Pr    | 1.39E-83 |         |
| P61296                  | HAND2_HUMAN Heart- and neural crest derivatives-expressed protein 2 OS=Homo sapiens GN=HAND2 PE=1 SV=1                  |          |         |
| P61313                  | RL15_HUMAN 60S ribosomal protein L15 OS=Homo sapiens GN=RPL15 PE=1 SV=2                                                 |          | 576.72  |
| P61326                  | MGN_HUMAN Protein mago nashi homolog OS=Homo sapiens GN=MAGOH PE=1 SV=1                                                 |          | 300.21  |
| P61353                  | RL27_HUMAN 60S ribosomal protein L27 OS=Homo sapiens GN=RPL27 PE=1 SV=2                                                 |          | 374.34  |
| P61421                  | VAOD1_HUMAN V-type proton ATPase subunit d 1 OS=Homo sapiens GN=ATP6V0D1 PE=1 SV=1                                      |          |         |
| P61457                  | PHS_HUMAN Pterin-4-alpha-carbinolamine dehydratase OS=Homo sapiens GN=PCBD1 PE=1 SV=2                                   |          | 102.33  |
| P61513                  | RL37A_HUMAN 60S ribosomal protein L37a OS=Homo sapiens GN=RPL37A PE=1 SV=2                                              |          | 317.52  |
| P61565                  | ENK1_HUMAN HERV-K_12q14.1 provirus ancestral Env polyprotein OS=Homo sapiens PE=1 SV=1                                  |          |         |
| P61566                  | ENK11_HUMAN HERV-K_22q11.21 provirus ancestral Env polyprotein OS=Homo sapiens PE=2 SV=1                                |          |         |
| P61567                  | ENK12_HUMAN HERV-K_1q22 provirus ancestral Env polyprotein OS=Homo sapiens PE=2 SV=1                                    |          |         |
| P61570                  | ENK17_HUMAN HERV-K_11q22.1 provirus ancestral Env polyprotein OS=Homo sapiens PE=3 SV=1                                 |          |         |
| P61571                  | REC1_HUMAN HERV-K_12q14.1 provirus Rec protein OS=Homo sapiens PE=1 SV=1                                                |          |         |
| P61586                  | RHOA_HUMAN Transforming protein RhoA OS=Homo sapiens GN=RHOA PE=1 SV=1                                                  |          | 987.22  |
| P61599                  | NAA20_HUMAN N-alpha-acetyltransferase 20, NatB catalytic subunit OS=Homo sapiens GN=NAA20 PE=1 SV=1                     | 9.44E-07 |         |
| P61601                  | NCALD_HUMAN Neurocalcin-delta OS=Homo sapiens GN=NCALD PE=2 SV=2                                                        |          | 204.25  |
| P61604                  | CH10_HUMAN 10 kDa heat shock protein, mitochondrial OS=Homo sapiens GN=HSPE1 PE=1 SV=2                                  |          | 530.55  |
| P61619                  | S61A1_HUMAN Protein transport protein Sec61 subunit alpha isoform 1 OS=Homo sapiens GN=SEC61A1 PE=1 SV=2                |          | 259.03  |
| P61619-3                | S61A1_HUMAN Isoform 3 of Protein transport protein Sec61 subunit alpha isoform 1 OS=Homo sapiens GN=SEC61A1             |          | 120.6   |
| P61619;P61619-3         | S61A1_HUMAN Protein transport protein Sec61 subunit alpha isoform 1 OS=Homo sapiens GN=SEC61A1 PE=1 SV=2;>sp P61619-3 S | 2.47E-36 |         |



|                        |                                                                                                                          |           |         |
|------------------------|--------------------------------------------------------------------------------------------------------------------------|-----------|---------|
| P61626                 | LYSC_HUMAN Lysozyme C OS=Homo sapiens GN=LYZ PE=1 SV=1                                                                   | 6.60E-199 |         |
| P61758                 | PFD3_HUMAN Prefoldin subunit 3 OS=Homo sapiens GN=VBP1 PE=1 SV=3                                                         |           | 313.67  |
| P61764                 | STXB1_HUMAN Syntaxin-binding protein 1 OS=Homo sapiens GN=STXBP1 PE=1 SV=1                                               |           | 25.19   |
| P61764-2               | STXB1_HUMAN Isoform 2 of Syntaxin-binding protein 1 OS=Homo sapiens GN=STXBP1                                            |           | 25.19   |
| P61764-2;P61764        | 2 STXB1_HUMAN Isoform 2 of Syntaxin-binding protein 1 OS=Homo sapiens GN=STXBP1;>sp P61764 STXB1_HUMAN Syntaxin-bind     | 4.82E-46  |         |
| P61769                 | B2MG_HUMAN Beta-2-microglobulin OS=Homo sapiens GN=B2M PE=1 SV=1                                                         |           | 208.37  |
| P61803                 | DAD1_HUMAN Dolichyl-diphosphooligosaccharide--protein glycosyltransferase subunit DAD1 OS=Homo sapiens GN=DAD1 PE=1 SV=3 |           | 192.58  |
| P61812-2;B2R7T2;P61812 | 2 TGFB2_HUMAN Isoform B of Transforming growth factor beta-2 OS=Homo sapiens GN=TGFB2;>tr B2R7T2 B2R7T2_HUMAN cDNA, I    | 6.53E-23  |         |
| P61916                 | NPC2_HUMAN Epididymal secretory protein E1 OS=Homo sapiens GN=NPC2 PE=1 SV=1                                             |           | 264.4   |
| P61923                 | COPZ1_HUMAN Coatomer subunit zeta-1 OS=Homo sapiens GN=COPZ1 PE=1 SV=1                                                   |           | 187.87  |
| P61927                 | RL37_HUMAN 60S ribosomal protein L37 OS=Homo sapiens GN=RPL37 PE=1 SV=2                                                  | 1.71E-06  |         |
| P61956                 | SUMO2_HUMAN Small ubiquitin-related modifier 2 OS=Homo sapiens GN=SUMO2 PE=1 SV=2                                        |           | 64.64   |
| P61960                 | UFM1_HUMAN Ubiquitin-fold modifier 1 OS=Homo sapiens GN=UFM1 PE=1 SV=1                                                   |           | 33.51   |
| P61962                 | DCAF7_HUMAN DDB1- and CUL4-associated factor 7 OS=Homo sapiens GN=DCAF7 PE=1 SV=1                                        |           |         |
| P61964                 | WDR5_HUMAN WD repeat-containing protein 5 OS=Homo sapiens GN=WDR5 PE=1 SV=1                                              |           | 209.21  |
| P61966                 | AP1S1_HUMAN AP-1 complex subunit sigma-1A OS=Homo sapiens GN=AP1S1 PE=1 SV=1                                             |           |         |
| P61966-2               | AP1S1_HUMAN Isoform 2 of AP-1 complex subunit sigma-1A OS=Homo sapiens GN=AP1S1                                          |           |         |
| P61966;P61966-2        | AP1S1_HUMAN AP-1 complex subunit sigma-1A OS=Homo sapiens GN=AP1S1 PE=1 SV=1;>sp P61966-2 AP1S1_HUMAN Isoform 2 o        | 1.70E-34  |         |
| P61970                 | NTF2_HUMAN Nuclear transport factor 2 OS=Homo sapiens GN=NUTF2 PE=1 SV=1                                                 |           | 189.29  |
| P61978                 | HNRPK_HUMAN Heterogeneous nuclear ribonucleoprotein K OS=Homo sapiens GN=HNRNPK PE=1 SV=1                                |           | 1276.79 |
| P61978-2               | HNRPK_HUMAN Isoform 2 of Heterogeneous nuclear ribonucleoprotein K OS=Homo sapiens GN=HNRNPK                             |           | 1276.79 |
| P61978-2;P61978        | 2 HNRPK_HUMAN Isoform 2 of Heterogeneous nuclear ribonucleoprotein K OS=Homo sapiens GN=HNRNPK;>sp P61978 HNRPK_HUM.     | 0         |         |
| P61978-3               | HNRPK_HUMAN Isoform 3 of Heterogeneous nuclear ribonucleoprotein K OS=Homo sapiens GN=HNRNPK                             |           | 1196.33 |
| P61978-3;B4DUQ1;Q5T6V  | 3 HNRPK_HUMAN Isoform 3 of Heterogeneous nuclear ribonucleoprotein K OS=Homo sapiens GN=HNRNPK;>tr B4DUQ1 B4DUQ1_HU      | 0         |         |
| P61981                 | 1433G_HUMAN 14-3-3 protein gamma OS=Homo sapiens GN=YWHAG PE=1 SV=2                                                      |           | 829.73  |
| P62068                 | UBP46_HUMAN Ubiquitin carboxyl-terminal hydrolase 46 OS=Homo sapiens GN=USP46 PE=1 SV=1                                  |           |         |
| P62068-2               | UBP46_HUMAN Isoform 2 of Ubiquitin carboxyl-terminal hydrolase 46 OS=Homo sapiens GN=USP46                               |           |         |
| P62068-3               | UBP46_HUMAN Isoform 3 of Ubiquitin carboxyl-terminal hydrolase 46 OS=Homo sapiens GN=USP46                               |           |         |
| P62068-4               | UBP46_HUMAN Isoform 4 of Ubiquitin carboxyl-terminal hydrolase 46 OS=Homo sapiens GN=USP46                               |           |         |
| P62070                 | RRAS2_HUMAN Ras-related protein R-Ras2 OS=Homo sapiens GN=RRAS2 PE=1 SV=1                                                |           | 485.94  |
| P62072                 | TIM10_HUMAN Mitochondrial import inner membrane translocase subunit Tim10 OS=Homo sapiens GN=TIMM10 PE=1 SV=1            |           | 142.36  |
| P62081                 | RS7_HUMAN 40S ribosomal protein S7 OS=Homo sapiens GN=RPS7 PE=1 SV=1                                                     |           | 903.13  |
| P62136                 | PP1A_HUMAN Serine/threonine-protein phosphatase PP1-alpha catalytic subunit OS=Homo sapiens GN=PPP1CA PE=1 SV=1          |           | 835.58  |
| P62140                 | PP1B_HUMAN Serine/threonine-protein phosphatase PP1-beta catalytic subunit OS=Homo sapiens GN=PPP1CB PE=1 SV=3           |           | 820.69  |
| P62158                 | CALM_HUMAN Calmodulin OS=Homo sapiens GN=CALM1 PE=1 SV=2                                                                 |           | 715.55  |
| P62166                 | NCS1_HUMAN Neuronal calcium sensor 1 OS=Homo sapiens GN=NCS1 PE=1 SV=2                                                   |           | 26.14   |
| P62191                 | PRS4_HUMAN 26S protease regulatory subunit 4 OS=Homo sapiens GN=PSMC1 PE=1 SV=1                                          |           | 485.56  |
| P62195                 | PRS8_HUMAN 26S protease regulatory subunit 8 OS=Homo sapiens GN=PSMC5 PE=1 SV=1                                          |           | 478.44  |
| P62241                 | RS8_HUMAN 40S ribosomal protein S8 OS=Homo sapiens GN=RPS8 PE=1 SV=2                                                     |           | 778.23  |
| P62244                 | RS15A_HUMAN 40S ribosomal protein S15a OS=Homo sapiens GN=RPS15A PE=1 SV=2                                               |           | 533.45  |
| P62249                 | RS16_HUMAN 40S ribosomal protein S16 OS=Homo sapiens GN=RPS16 PE=1 SV=2                                                  |           | 680.96  |
| P62256                 | UBE2H_HUMAN Ubiquitin-conjugating enzyme E2 H OS=Homo sapiens GN=UBE2H PE=1 SV=1                                         | 1.49E-17  |         |
| P62258                 | 1433E_HUMAN 14-3-3 protein epsilon OS=Homo sapiens GN=YWHAE PE=1 SV=1                                                    |           | 1579.84 |
| P62258-2               | 1433E_HUMAN Isoform SV of 14-3-3 protein epsilon OS=Homo sapiens GN=YWHAE                                                |           | 1423.75 |
| P62258;P62258-2        | 1433E_HUMAN 14-3-3 protein epsilon OS=Homo sapiens GN=YWHAE PE=1 SV=1;>sp P62258-2 1433E_HUMAN Isoform SV of 14-3-1      | 0         |         |
| P62263                 | RS14_HUMAN 40S ribosomal protein S14 OS=Homo sapiens GN=RPS14 PE=1 SV=3                                                  |           | 643.14  |
| P62266                 | RS23_HUMAN 40S ribosomal protein S23 OS=Homo sapiens GN=RPS23 PE=1 SV=3                                                  |           | 271.93  |
| P62269                 | RS18_HUMAN 40S ribosomal protein S18 OS=Homo sapiens GN=RPS18 PE=1 SV=3                                                  |           | 827.24  |
| P62273                 | RS29_HUMAN 40S ribosomal protein S29 OS=Homo sapiens GN=RPS29 PE=1 SV=2                                                  |           | 202.05  |
| P62277                 | RS13_HUMAN 40S ribosomal protein S13 OS=Homo sapiens GN=RPS13 PE=1 SV=2                                                  |           | 564.61  |
| P62280                 | RS11_HUMAN 40S ribosomal protein S11 OS=Homo sapiens GN=RPS11 PE=1 SV=3                                                  |           | 612.88  |
| P62304                 | RUXE_HUMAN Small nuclear ribonucleoprotein E OS=Homo sapiens GN=SNRPE PE=1 SV=1                                          |           | 569.46  |
| P62306                 | RUXF_HUMAN Small nuclear ribonucleoprotein F OS=Homo sapiens GN=SNRPF PE=1 SV=1                                          |           | 420.41  |
| P62308                 | RUXG_HUMAN Small nuclear ribonucleoprotein G OS=Homo sapiens GN=SNRPG PE=1 SV=1                                          |           | 316.18  |
| P62310                 | LSM3_HUMAN U6 snRNA-associated Sm-like protein LSM3 OS=Homo sapiens GN=LSM3 PE=1 SV=2                                    |           |         |
| P62312                 | LSM6_HUMAN U6 snRNA-associated Sm-like protein LSM6 OS=Homo sapiens GN=LSM6 PE=1 SV=1                                    |           | 197.3   |
| P62314                 | SMD1_HUMAN Small nuclear ribonucleoprotein Sm D1 OS=Homo sapiens GN=SNRPD1 PE=1 SV=1                                     |           | 445.02  |
| P62316                 | SMD2_HUMAN Small nuclear ribonucleoprotein Sm D2 OS=Homo sapiens GN=SNRPD2 PE=1 SV=1                                     |           | 539.22  |
| P62318                 | SMD3_HUMAN Small nuclear ribonucleoprotein Sm D3 OS=Homo sapiens GN=SNRPD3 PE=1 SV=1                                     |           | 306.06  |
| P62330                 | ARF6_HUMAN ADP-ribosylation factor 6 OS=Homo sapiens GN=ARF6 PE=1 SV=2                                                   |           | 454.95  |
| P62333                 | PRS10_HUMAN 26S protease regulatory subunit 10B OS=Homo sapiens GN=PSMC6 PE=1 SV=1                                       |           | 330.86  |

|                        |                                                                                                                           |           |         |
|------------------------|---------------------------------------------------------------------------------------------------------------------------|-----------|---------|
| P62341                 | SELT_HUMAN Selenoprotein T OS=Homo sapiens GN=SELT PE=2 SV=2                                                              | 1.76E-05  |         |
| P62380                 | TBPL1_HUMAN TATA box-binding protein-like protein 1 OS=Homo sapiens GN=TBPL1 PE=1 SV=1                                    |           | 45.16   |
| P62424                 | RL7A_HUMAN 60S ribosomal protein L7a OS=Homo sapiens GN=RPL7A PE=1 SV=2                                                   |           | 1211.55 |
| P62487                 | RPB7_HUMAN DNA-directed RNA polymerase II subunit RPB7 OS=Homo sapiens GN=POLR2G PE=1 SV=1                                |           | 111.71  |
| P62491                 | RB11A_HUMAN Ras-related protein Rab-11A OS=Homo sapiens GN=RAB11A PE=1 SV=3                                               |           | 425.5   |
| P62495                 | ERF1_HUMAN Eukaryotic peptide chain release factor subunit 1 OS=Homo sapiens GN=ETF1 PE=1 SV=3                            |           | 232.99  |
| P62633                 | CNBP_HUMAN Cellular nucleic acid-binding protein OS=Homo sapiens GN=CNBP PE=1 SV=1                                        |           | 183.38  |
| P62633-2               | CNBP_HUMAN Isoform 2 of Cellular nucleic acid-binding protein OS=Homo sapiens GN=CNBP                                     |           | 183.38  |
| P62633-3               | CNBP_HUMAN Isoform 3 of Cellular nucleic acid-binding protein OS=Homo sapiens GN=CNBP                                     |           | 122.76  |
| P62633;P62633-2;P62633 | CNBP_HUMAN Cellular nucleic acid-binding protein OS=Homo sapiens GN=CNBP PE=1 SV=1;>sp P62633-2 CNBP_HUMAN Isoform 2 of C | 2.25E-50  |         |
| P62699                 | YPEL5_HUMAN Protein yippee-like 5 OS=Homo sapiens GN=YPEL5 PE=2 SV=1                                                      | 6.45E-17  |         |
| P62701                 | RS4X_HUMAN 40S ribosomal protein S4, X isoform OS=Homo sapiens GN=RPS4X PE=1 SV=2                                         |           | 1108.72 |
| P62714                 | PP2AB_HUMAN Serine/threonine-protein phosphatase 2A catalytic subunit beta isoform OS=Homo sapiens GN=PPP2CB PE=1 SV=1    |           | 172.98  |
| P62736                 | ACTA_HUMAN Actin, aortic smooth muscle OS=Homo sapiens GN=ACTA2 PE=1 SV=1                                                 |           | 1109.31 |
| P62745                 | RHOB_HUMAN Rho-related GTP-binding protein RhoB OS=Homo sapiens GN=RHOB PE=1 SV=1                                         |           | 172.97  |
| P62750                 | RL23A_HUMAN 60S ribosomal protein L23a OS=Homo sapiens GN=RPL23A PE=1 SV=1                                                |           | 648.54  |
| P62753                 | RS6_HUMAN 40S ribosomal protein S6 OS=Homo sapiens GN=RPS6 PE=1 SV=1                                                      |           | 607.04  |
| P62805                 | H4_HUMAN Histone H4 OS=Homo sapiens GN=HIST1H4A PE=1 SV=2                                                                 |           | 895.29  |
| P62807                 | H2B1C_HUMAN Histone H2B type 1-C/E/F/G/I OS=Homo sapiens GN=HIST1H2BC PE=1 SV=4                                           |           | 705.5   |
| P62820                 | RAB1A_HUMAN Ras-related protein Rab-1A OS=Homo sapiens GN=RAB1A PE=1 SV=3                                                 |           | 1001.3  |
| P62820-2               | RAB1A_HUMAN Isoform 2 of Ras-related protein Rab-1A OS=Homo sapiens GN=RAB1A                                              |           | 734.32  |
| P62820-3               | RAB1A_HUMAN Isoform 3 of Ras-related protein Rab-1A OS=Homo sapiens GN=RAB1A                                              |           | 739.85  |
| P62820;P62820-2;P62820 | RAB1A_HUMAN Ras-related protein Rab-1A OS=Homo sapiens GN=RAB1A PE=1 SV=3;>sp P62820-2 RAB1A_HUMAN Isoform 2 of Ra        | 4.61E-255 |         |
| P62826                 | RAN_HUMAN GTP-binding nuclear protein Ran OS=Homo sapiens GN=RAN PE=1 SV=3                                                |           | 535.51  |
| P62829                 | RL23_HUMAN 60S ribosomal protein L23 OS=Homo sapiens GN=RPL23 PE=1 SV=1                                                   |           | 789.04  |
| P62834                 | RAP1A_HUMAN Ras-related protein Rap-1A OS=Homo sapiens GN=RAP1A PE=1 SV=1                                                 |           | 493.61  |
| P62837                 | UB2D2_HUMAN Ubiquitin-conjugating enzyme E2 D2 OS=Homo sapiens GN=UBE2D2 PE=1 SV=1                                        |           | 28.74   |
| P62841                 | RS15_HUMAN 40S ribosomal protein S15 OS=Homo sapiens GN=RPS15 PE=1 SV=2                                                   |           | 889.24  |
| P62847                 | RS24_HUMAN 40S ribosomal protein S24 OS=Homo sapiens GN=RPS24 PE=1 SV=1                                                   |           | 392.93  |
| P62847-2               | RS24_HUMAN Isoform 2 of 40S ribosomal protein S24 OS=Homo sapiens GN=RPS24                                                |           | 392.93  |
| P62847-3               | RS24_HUMAN Isoform 3 of 40S ribosomal protein S24 OS=Homo sapiens GN=RPS24                                                |           | 392.93  |
| P62847;P62847-3;P62847 | RS24_HUMAN 40S ribosomal protein S24 OS=Homo sapiens GN=RPS24 PE=1 SV=1;>sp P62847-3 RS24_HUMAN Isoform 3 of 40S ri       | 1.21E-96  |         |
| P62851                 | RS25_HUMAN 40S ribosomal protein S25 OS=Homo sapiens GN=RPS25 PE=1 SV=1                                                   |           | 288.38  |
| P62854                 | RS26_HUMAN 40S ribosomal protein S26 OS=Homo sapiens GN=RPS26 PE=1 SV=3                                                   |           | 309.45  |
| P62857                 | RS28_HUMAN 40S ribosomal protein S28 OS=Homo sapiens GN=RPS28 PE=1 SV=1                                                   |           | 170.27  |
| P62861                 | RS30_HUMAN 40S ribosomal protein S30 OS=Homo sapiens GN=FAU PE=1 SV=1                                                     |           | 120.85  |
| P62873                 | GBB1_HUMAN Guanine nucleotide-binding protein G(I)/G(S)/G(T) subunit beta-1 OS=Homo sapiens GN=GNB1 PE=1 SV=3             |           | 528.59  |
| P62875                 | RPAB5_HUMAN DNA-directed RNA polymerases I, II, and III subunit RPABC5 OS=Homo sapiens GN=POLR2L PE=1 SV=1                |           | 101.67  |
| P62877                 | RBX1_HUMAN E3 ubiquitin-protein ligase RBX1 OS=Homo sapiens GN=RBX1 PE=1 SV=1                                             |           | 41.12   |
| P62879                 | GBB2_HUMAN Guanine nucleotide-binding protein G(I)/G(S)/G(T) subunit beta-2 OS=Homo sapiens GN=GNB2 PE=1 SV=3             |           | 868.57  |
| P62888                 | RL30_HUMAN 60S ribosomal protein L30 OS=Homo sapiens GN=RPL30 PE=1 SV=2                                                   |           | 735.19  |
| P62891;Q59GN2          | RL39_HUMAN 60S ribosomal protein L39 OS=Homo sapiens GN=RPL39 PE=2 SV=2;>sp Q59GN2 R39L5_HUMAN Putative 60S ribosor       | 2.91E-06  |         |
| P62899                 | RL31_HUMAN 60S ribosomal protein L31 OS=Homo sapiens GN=RPL31 PE=1 SV=1                                                   |           | 305.62  |
| P62906                 | RL10A_HUMAN 60S ribosomal protein L10a OS=Homo sapiens GN=RPL10A PE=1 SV=2                                                |           | 957.27  |
| P62910                 | RL32_HUMAN 60S ribosomal protein L32 OS=Homo sapiens GN=RPL32 PE=1 SV=2                                                   |           | 445.24  |
| P62913                 | RL11_HUMAN 60S ribosomal protein L11 OS=Homo sapiens GN=RPL11 PE=1 SV=2                                                   |           | 275.6   |
| P62913-2               | RL11_HUMAN Isoform 2 of 60S ribosomal protein L11 OS=Homo sapiens GN=RPL11                                                |           | 275.6   |
| P62913-2;P62913        | 2 RL11_HUMAN Isoform 2 of 60S ribosomal protein L11 OS=Homo sapiens GN=RPL11;>sp P62913 RL11_HUMAN 60S ribosomal prote    | 7.20E-177 |         |
| P62913;P62913-2        | RL11_HUMAN 60S ribosomal protein L11 OS=Homo sapiens GN=RPL11 PE=1 SV=2;>sp P62913-2 RL11_HUMAN Isoform 2 of 60S rib      | 8.18E-105 |         |
| P62917                 | RL8_HUMAN 60S ribosomal protein L8 OS=Homo sapiens GN=RPL8 PE=1 SV=2                                                      |           | 652.19  |
| P62937                 | PPIA_HUMAN Peptidyl-prolyl cis-trans isomerase A OS=Homo sapiens GN=PPIA PE=1 SV=2                                        |           | 1366.76 |
| P62942                 | FKB1A_HUMAN Peptidyl-prolyl cis-trans isomerase FKBP1A OS=Homo sapiens GN=FKBP1A PE=1 SV=2                                |           | 202.14  |
| P62979                 | RS27A_HUMAN Ubiquitin-40S ribosomal protein S27a OS=Homo sapiens GN=RPS27A PE=1 SV=2                                      |           | 548.86  |
| P62987                 | RL40_HUMAN Ubiquitin-60S ribosomal protein L40 OS=Homo sapiens GN=UBA52 PE=1 SV=2                                         |           | 469.82  |
| P62993                 | GRB2_HUMAN Growth factor receptor-bound protein 2 OS=Homo sapiens GN=GRB2 PE=1 SV=1                                       |           | 203.67  |
| P62993-2               | GRB2_HUMAN Isoform GRB3-3 of Growth factor receptor-bound protein 2 OS=Homo sapiens GN=GRB2                               |           | 167.14  |
| P62993;P62993-2        | GRB2_HUMAN Growth factor receptor-bound protein 2 OS=Homo sapiens GN=GRB2 PE=1 SV=1;>sp P62993-2 GRB2_HUMAN Isoform       | 1.02E-63  |         |
| P62995                 | TRA2B_HUMAN Transformer-2 protein homolog beta OS=Homo sapiens GN=TRA2B PE=1 SV=1                                         |           | 51.06   |
| P62995-3               | TRA2B_HUMAN Isoform 3 of Transformer-2 protein homolog beta OS=Homo sapiens GN=TRA2B                                      |           | 50.67   |
| P62995;P62995-3        | TRA2B_HUMAN Transformer-2 protein homolog beta OS=Homo sapiens GN=TRA2B PE=1 SV=1;>sp P62995-3 TRA2B_HUMAN Isoform        | 4.64E-52  |         |
| P63000                 | RAC1_HUMAN Ras-related C3 botulinum toxin substrate 1 OS=Homo sapiens GN=RAC1 PE=1 SV=1                                   |           | 486.08  |

|                        |                                                                                                                                   |           |         |
|------------------------|-----------------------------------------------------------------------------------------------------------------------------------|-----------|---------|
| P63000-2               | RAC1_HUMAN Isoform B of Ras-related C3 botulinum toxin substrate 1 OS=Homo sapiens GN=RAC1                                        |           | 461.82  |
| P63000-2;P63000        | 2 RAC1_HUMAN Isoform B of Ras-related C3 botulinum toxin substrate 1 OS=Homo sapiens GN=RAC1;>sp P63000 RAC1_HUMAN Ra:            | 2.24E-69  |         |
| P63010                 | AP2B1_HUMAN AP-2 complex subunit beta OS=Homo sapiens GN=AP2B1 PE=1 SV=1                                                          |           | 1625.5  |
| P63010-2               | AP2B1_HUMAN Isoform 2 of AP-2 complex subunit beta OS=Homo sapiens GN=AP2B1                                                       |           | 1625.5  |
| P63010-2;P63010        | 2 AP2B1_HUMAN Isoform 2 of AP-2 complex subunit beta OS=Homo sapiens GN=AP2B1;>sp P63010 AP2B1_HUMAN AP-2 complex s               | 2.04E-166 |         |
| P63027                 | VAMP2_HUMAN Vesicle-associated membrane protein 2 OS=Homo sapiens GN=VAMP2 PE=1 SV=3                                              |           | 363.18  |
| P63092                 | GNAS2_HUMAN Guanine nucleotide-binding protein G(s) subunit alpha isoforms short OS=Homo sapiens GN=GNAS PE=1 SV=1                |           | 592.86  |
| P63092-2               | GNAS2_HUMAN Isoform 2 of Guanine nucleotide-binding protein G(s) subunit alpha isoforms short OS=Homo sapiens GN=GNAS             |           | 592.86  |
| P63092-3               | GNAS2_HUMAN Isoform 3 of Guanine nucleotide-binding protein G(s) subunit alpha isoforms short OS=Homo sapiens GN=GNAS             |           | 592.86  |
| P63096                 | GNAI1_HUMAN Guanine nucleotide-binding protein G(i) subunit alpha-1 OS=Homo sapiens GN=GNAI1 PE=1 SV=2                            |           | 327.66  |
| P63098                 | CANB1_HUMAN Calcineurin subunit B type 1 OS=Homo sapiens GN=PPP3R1 PE=1 SV=2                                                      |           | 101.98  |
| P63104                 | 1433Z_HUMAN 14-3-3 protein zeta/delta OS=Homo sapiens GN=YWHAZ PE=1 SV=1                                                          |           | 1484.68 |
| P63135                 | POK12_HUMAN HERV-K_1q22 provirus ancestral Pol protein OS=Homo sapiens PE=3 SV=1                                                  |           |         |
| P63151                 | 2ABA_HUMAN Serine/threonine-protein phosphatase 2A 55 kDa regulatory subunit B alpha isoform OS=Homo sapiens GN=PPP2R2A PE=1 SV=1 |           | 66.3    |
| P63162                 | RSMN_HUMAN Small nuclear ribonucleoprotein-associated protein N OS=Homo sapiens GN=SNRPN PE=1 SV=1                                |           | 415.68  |
| P63165                 | SUMO1_HUMAN Small ubiquitin-related modifier 1 OS=Homo sapiens GN=SUMO1 PE=1 SV=1                                                 |           | 61.72   |
| P63167                 | DYL1_HUMAN Dynein light chain 1, cytoplasmic OS=Homo sapiens GN=DYNLL1 PE=1 SV=1                                                  |           | 283     |
| P63172                 | DYLT1_HUMAN Dynein light chain Tctex-type 1 OS=Homo sapiens GN=DYNLT1 PE=1 SV=1                                                   |           | 132.61  |
| P63173                 | RL38_HUMAN 60S ribosomal protein L38 OS=Homo sapiens GN=RPL38 PE=1 SV=2                                                           |           | 427.88  |
| P63208                 | SKP1_HUMAN S-phase kinase-associated protein 1 OS=Homo sapiens GN=SKP1 PE=1 SV=2                                                  |           | 422.82  |
| P63208-2               | SKP1_HUMAN Isoform 2 of S-phase kinase-associated protein 1 OS=Homo sapiens GN=SKP1                                               |           | 350.64  |
| P63208;P63208-2        | SKP1_HUMAN S-phase kinase-associated protein 1 OS=Homo sapiens GN=SKP1 PE=1 SV=2;>sp P63208-2 SKP1_HUMAN Isoform 2 c              | 2.39E-43  |         |
| P63218                 | GBG5_HUMAN Guanine nucleotide-binding protein G(I)/G(S)/G(O) subunit gamma-5 OS=Homo sapiens GN=GNG5 PE=1 SV=3                    |           | 31.66   |
| P63220                 | RS21_HUMAN 40S ribosomal protein S21 OS=Homo sapiens GN=RPS21 PE=1 SV=1                                                           |           | 476.88  |
| P63241                 | IF5A1_HUMAN Eukaryotic translation initiation factor 5A-1 OS=Homo sapiens GN=EIF5A PE=1 SV=2                                      |           | 822.63  |
| P63241-2               | IF5A1_HUMAN Isoform 2 of Eukaryotic translation initiation factor 5A-1 OS=Homo sapiens GN=EIF5A                                   |           | 822.63  |
| P63241-2;D3DTP2;P63241 | 2 IF5A1_HUMAN Isoform 2 of Eukaryotic translation initiation factor 5A-1 OS=Homo sapiens GN=EIF5A;>tr D3DTP2 D3DTP2_HUMAN         | 4.61E-218 |         |
| P63244                 | GBLP_HUMAN Guanine nucleotide-binding protein subunit beta-2-like 1 OS=Homo sapiens GN=GNB2L1 PE=1 SV=3                           |           | 1369.53 |
| P63261                 | ACTG_HUMAN Actin, cytoplasmic 2 OS=Homo sapiens GN=ACTG1 PE=1 SV=1                                                                |           | 2352.17 |
| P63267                 | ACTH_HUMAN Actin, gamma-enteric smooth muscle OS=Homo sapiens GN=ACTG2 PE=1 SV=1                                                  |           | 1105.01 |
| P63272                 | SPT4H_HUMAN Transcription elongation factor SPT4 OS=Homo sapiens GN=SUPT4H1 PE=1 SV=1                                             |           | 85.98   |
| P63279                 | UBC9_HUMAN SUMO-conjugating enzyme UBC9 OS=Homo sapiens GN=UBE2I PE=1 SV=1                                                        |           | 232.84  |
| P63313                 | TYB10_HUMAN Thymosin beta-10 OS=Homo sapiens GN=TMSB10 PE=1 SV=2                                                                  | 7.62E-11  |         |
| P67775                 | PP2AA_HUMAN Serine/threonine-protein phosphatase 2A catalytic subunit alpha isoform OS=Homo sapiens GN=PPP2CA PE=1 SV=1           |           | 198.87  |
| P67809                 | YBOX1_HUMAN Nuclease-sensitive element-binding protein 1 OS=Homo sapiens GN=YBX1 PE=1 SV=3                                        |           | 835.99  |
| P67812                 | SC11A_HUMAN Signal peptidase complex catalytic subunit SEC11A OS=Homo sapiens GN=SEC11A PE=1 SV=1                                 |           | 135.69  |
| P67870                 | CSK2B_HUMAN Casein kinase II subunit beta OS=Homo sapiens GN=CSNK2B PE=1 SV=1                                                     |           | 157.41  |
| P67936                 | TPM4_HUMAN Tropomyosin alpha-4 chain OS=Homo sapiens GN=TPM4 PE=1 SV=3                                                            |           | 663.62  |
| P67936-2               | TPM4_HUMAN Isoform 2 of Tropomyosin alpha-4 chain OS=Homo sapiens GN=TPM4                                                         |           | 386.92  |
| P67936;B4DVY2;B4DTB1   | TPM4_HUMAN Tropomyosin alpha-4 chain OS=Homo sapiens GN=TPM4 PE=1 SV=3;>tr B4DVY2 B4DVY2_HUMAN cDNA FLJ54184, hiç                 | 1.23E-188 |         |
| P68032                 | ACTC_HUMAN Actin, alpha cardiac muscle 1 OS=Homo sapiens GN=ACTC1 PE=1 SV=1                                                       |           | 1210.38 |
| P68036                 | UB2L3_HUMAN Ubiquitin-conjugating enzyme E2 L3 OS=Homo sapiens GN=UBE2L3 PE=1 SV=1                                                |           | 109.42  |
| P68104                 | EF1A1_HUMAN Elongation factor 1-alpha 1 OS=Homo sapiens GN=EEF1A1 PE=1 SV=1                                                       |           | 1752.46 |
| P68133                 | ACTS_HUMAN Actin, alpha skeletal muscle OS=Homo sapiens GN=ACTA1 PE=1 SV=1                                                        |           | 1198.17 |
| P68363                 | TBA1B_HUMAN Tubulin alpha-1B chain OS=Homo sapiens GN=TUBA1B PE=1 SV=1                                                            |           | 1294.17 |
| P68366                 | TBA4A_HUMAN Tubulin alpha-4A chain OS=Homo sapiens GN=TUBA4A PE=1 SV=1                                                            |           | 1094.51 |
| P68371                 | TBB2C_HUMAN Tubulin beta-2C chain OS=Homo sapiens GN=TUBB2C PE=1 SV=1                                                             |           | 2376.63 |
| P68400                 | CSK21_HUMAN Casein kinase II subunit alpha OS=Homo sapiens GN=CSNK2A1 PE=1 SV=1                                                   |           | 290.34  |
| P68402                 | PA1B2_HUMAN Platelet-activating factor acetylhydrolase IB subunit beta OS=Homo sapiens GN=PAFAH1B2 PE=1 SV=1                      |           | 112.51  |
| P68431                 | H31_HUMAN Histone H3.1 OS=Homo sapiens GN=HIST1H3A PE=1 SV=2                                                                      |           | 216.15  |
| P68871                 | HBB_HUMAN Hemoglobin subunit beta OS=Homo sapiens GN=HBB PE=1 SV=2                                                                |           | 1045.75 |
| P69849                 | NOMO3_HUMAN Nodal modulator 3 OS=Homo sapiens GN=NOMO3 PE=2 SV=2                                                                  |           | 174.04  |
| P69891                 | HBG1_HUMAN Hemoglobin subunit gamma-1 OS=Homo sapiens GN=HBG1 PE=1 SV=2                                                           |           | 66.95   |
| P69892                 | HBG2_HUMAN Hemoglobin subunit gamma-2 OS=Homo sapiens GN=HBG2 PE=1 SV=2                                                           |           | 66.95   |
| P69905                 | HBA_HUMAN Hemoglobin subunit alpha OS=Homo sapiens GN=HBA1 PE=1 SV=2                                                              |           | 484.03  |
| P78312                 | F193A_HUMAN Protein FAM193A OS=Homo sapiens GN=FAM193A PE=1 SV=2                                                                  |           |         |
| P78312-2               | F193A_HUMAN Isoform 2 of Protein FAM193A OS=Homo sapiens GN=FAM193A                                                               |           |         |
| P78312-4               | F193A_HUMAN Isoform 4 of Protein FAM193A OS=Homo sapiens GN=FAM193A                                                               |           |         |
| P78316;P78316-2        | NOP14_HUMAN Nucleolar protein 14 OS=Homo sapiens GN=NOP14 PE=1 SV=3;>sp P78316-2 NOP14_HUMAN Isoform 2 of Nucleolar               | 3.40E-11  |         |
| P78318                 | IGBP1_HUMAN Immunoglobulin-binding protein 1 OS=Homo sapiens GN=IGBP1 PE=1 SV=1                                                   | 1.35E-14  |         |
| P78324-2;P78324;P78324 | 2 SHPS1_HUMAN Isoform 2 of Tyrosine-protein phosphatase non-receptor type substrate 1 OS=Homo sapiens GN=SIRPA;>sp P78324         | 7.68E-15  |         |

|                      |                                                                                                                          |           |          |
|----------------------|--------------------------------------------------------------------------------------------------------------------------|-----------|----------|
| P78330               | SERB_HUMAN Phosphoserine phosphatase OS=Homo sapiens GN=PSPH PE=1 SV=2                                                   |           | 29.78    |
| P78332               | RBM6_HUMAN RNA-binding protein 6 OS=Homo sapiens GN=RBM6 PE=1 SV=5                                                       |           |          |
| P78344               | IF4G2_HUMAN Eukaryotic translation initiation factor 4 gamma 2 OS=Homo sapiens GN=EIF4G2 PE=1 SV=1                       |           | 340.02   |
| P78344-2             | IF4G2_HUMAN Isoform 2 of Eukaryotic translation initiation factor 4 gamma 2 OS=Homo sapiens GN=EIF4G2                    |           | 340.02   |
| P78344;P78344-2      | IF4G2_HUMAN Eukaryotic translation initiation factor 4 gamma 2 OS=Homo sapiens GN=EIF4G2 PE=1 SV=1;>sp P78344-2 IF4G2_HI | 1.82E-93  |          |
| P78345               | RPP38_HUMAN Ribonuclease P protein subunit p38 OS=Homo sapiens GN=RPP38 PE=1 SV=2                                        |           |          |
| P78346               | RPP30_HUMAN Ribonuclease P protein subunit p30 OS=Homo sapiens GN=RPP30 PE=1 SV=1                                        |           | 314.86   |
| P78347               | GTF2I_HUMAN General transcription factor II-I OS=Homo sapiens GN=GTF2I PE=1 SV=2                                         |           | 448.18   |
| P78347-2             | GTF2I_HUMAN Isoform 2 of General transcription factor II-I OS=Homo sapiens GN=GTF2I                                      |           | 448.18   |
| P78347-3             | GTF2I_HUMAN Isoform 3 of General transcription factor II-I OS=Homo sapiens GN=GTF2I                                      |           | 448.18   |
| P78347-4             | GTF2I_HUMAN Isoform 4 of General transcription factor II-I OS=Homo sapiens GN=GTF2I                                      |           | 448.18   |
| P78347;B4DH52;A8K9W7 | GTF2I_HUMAN General transcription factor II-I OS=Homo sapiens GN=GTF2I PE=1 SV=2;>tr B4DH52 B4DH52_HUMAN cDNA FLJ559     | 5.36E-44  |          |
| P78352               | DLG4_HUMAN Disks large homolog 4 OS=Homo sapiens GN=DLG4 PE=1 SV=3                                                       |           |          |
| P78352-2             | DLG4_HUMAN Isoform 2 of Disks large homolog 4 OS=Homo sapiens GN=DLG4                                                    |           |          |
| P78356               | PI42B_HUMAN Phosphatidylinositol-5-phosphate 4-kinase type-2 beta OS=Homo sapiens GN=PIP4K2B PE=1 SV=1                   | 5.92E-48  |          |
| P78362-2;P78362      | SRPK2_HUMAN Isoform 2 of Serine/threonine-protein kinase SRPK2 OS=Homo sapiens GN=SRPK2;>sp P78362 SRPK2_HUMAN Ser       | 1.27E-24  |          |
| P78371               | TCPB_HUMAN T-complex protein 1 subunit beta OS=Homo sapiens GN=CCT2 PE=1 SV=4                                            |           | 682.5    |
| P78383               | S35B1_HUMAN Solute carrier family 35 member B1 OS=Homo sapiens GN=SLC35B1 PE=2 SV=1                                      |           |          |
| P78385               | KRT83_HUMAN Keratin, type II cuticular Hb3 OS=Homo sapiens GN=KRT83 PE=1 SV=2                                            |           | 45       |
| P78386               | KRT85_HUMAN Keratin, type II cuticular Hb5 OS=Homo sapiens GN=KRT85 PE=1 SV=1                                            |           | 43.4     |
| P78406               | RAE1L_HUMAN mRNA export factor OS=Homo sapiens GN=RAE1 PE=1 SV=1                                                         |           | 22.05    |
| P78417               | GSTO1_HUMAN Glutathione S-transferase omega-1 OS=Homo sapiens GN=GSTO1 PE=1 SV=2                                         |           | 396.5    |
| P78423               | X3CL1_HUMAN Fractalkine OS=Homo sapiens GN=CX3CL1 PE=1 SV=1                                                              |           |          |
| P78424               | PO6F2_HUMAN POU domain, class 6, transcription factor 2 OS=Homo sapiens GN=POU6F2 PE=1 SV=3                              |           |          |
| P78424-2             | PO6F2_HUMAN Isoform 2 of POU domain, class 6, transcription factor 2 OS=Homo sapiens GN=POU6F2                           |           |          |
| P78527               | PRKDC_HUMAN DNA-dependent protein kinase catalytic subunit OS=Homo sapiens GN=PRKDC PE=1 SV=3                            |           | 14506.87 |
| P78527-2             | PRKDC_HUMAN Isoform 2 of DNA-dependent protein kinase catalytic subunit OS=Homo sapiens GN=PRKDC                         |           | 14257.34 |
| P78527;P78527-2      | PRKDC_HUMAN DNA-dependent protein kinase catalytic subunit OS=Homo sapiens GN=PRKDC PE=1 SV=3;>sp P78527-2 PRKDC_HU      | 0         |          |
| P78536               | ADA17_HUMAN Disintegrin and metalloproteinase domain-containing protein 17 OS=Homo sapiens GN=ADAM17 PE=1 SV=1           |           |          |
| P78536-2             | ADA17_HUMAN Isoform B of Disintegrin and metalloproteinase domain-containing protein 17 OS=Homo sapiens GN=ADAM17        |           |          |
| P78537               | BL1S1_HUMAN Biogenesis of lysosome-related organelles complex 1 subunit 1 OS=Homo sapiens GN=BLOC1S1 PE=1 SV=2           |           | 51.97    |
| P78537-2             | BL1S1_HUMAN Isoform 2 of Biogenesis of lysosome-related organelles complex 1 subunit 1 OS=Homo sapiens GN=BLOC1S1        |           | 51.97    |
| P78537;P78537-2      | BL1S1_HUMAN Biogenesis of lysosome-related organelles complex 1 subunit 1 OS=Homo sapiens GN=BLOC1S1 PE=1 SV=2;>sp P78!  | 6.21E-07  |          |
| P78559               | MAP1A_HUMAN Microtubule-associated protein 1A OS=Homo sapiens GN=MAP1A PE=1 SV=6                                         |           | 144.07   |
| P78559-2             | MAP1A_HUMAN Isoform 2 of Microtubule-associated protein 1A OS=Homo sapiens GN=MAP1A                                      |           | 144.07   |
| P78559-2;P78559      | MAP1A_HUMAN Isoform 2 of Microtubule-associated protein 1A OS=Homo sapiens GN=MAP1A;>sp P78559 MAP1A_HUMAN Microtul      | 7.42E-09  |          |
| P79483               | DRB3_HUMAN HLA class II histocompatibility antigen, DR beta 3 chain OS=Homo sapiens GN=HLA-DRB3 PE=1 SV=1                |           | 29.42    |
| P80108               | PHLD_HUMAN Phosphatidylinositol-glycan-specific phospholipase D OS=Homo sapiens GN=GPLD1 PE=1 SV=3                       |           | 36.67    |
| P80188               | NGAL_HUMAN Neutrophil gelatinase-associated lipocalin OS=Homo sapiens GN=LCN2 PE=1 SV=2                                  |           | 26.65    |
| P80188-2             | NGAL_HUMAN Isoform 2 of Neutrophil gelatinase-associated lipocalin OS=Homo sapiens GN=LCN2                               |           | 26.65    |
| P80188;P80188-2      | NGAL_HUMAN Neutrophil gelatinase-associated lipocalin OS=Homo sapiens GN=LCN2 PE=1 SV=2;>sp P80188-2 NGAL_HUMAN Isofo    | 6.01E-146 |          |
| P80217-2;P80217      | IN35_HUMAN Isoform 2 of Interferon-induced 35 kDa protein OS=Homo sapiens GN=IFI35;>sp P80217 IN35_HUMAN Interferon-in   | 4.51E-15  |          |
| P80294               | MT1H_HUMAN Metallothionein-1H OS=Homo sapiens GN=MT1H PE=1 SV=1                                                          | 9.09E-09  |          |
| P80303               | NUCB2_HUMAN Nucleobindin-2 OS=Homo sapiens GN=NUCB2 PE=1 SV=2                                                            |           | 519.18   |
| P80303-2             | NUCB2_HUMAN Isoform 2 of Nucleobindin-2 OS=Homo sapiens GN=NUCB2                                                         |           | 519.18   |
| P80303;P80303-2      | NUCB2_HUMAN Nucleobindin-2 OS=Homo sapiens GN=NUCB2 PE=1 SV=2;>sp P80303-2 NUCB2_HUMAN Isoform 2 of Nucleobindin-        | 4.95E-15  |          |
| P80370               | DLK1_HUMAN Protein delta homolog 1 OS=Homo sapiens GN=DLK1 PE=1 SV=3                                                     |           |          |
| P80370-2             | DLK1_HUMAN Isoform Short of Protein delta homolog 1 OS=Homo sapiens GN=DLK1                                              |           |          |
| P80404               | GABT_HUMAN 4-aminobutyrate aminotransferase, mitochondrial OS=Homo sapiens GN=ABAT PE=1 SV=3                             |           |          |
| P80723               | BASP1_HUMAN Brain acid soluble protein 1 OS=Homo sapiens GN=BASP1 PE=1 SV=2                                              |           | 846.85   |
| P80723-2             | BASP1_HUMAN Isoform 2 of Brain acid soluble protein 1 OS=Homo sapiens GN=BASP1                                           |           | 556.65   |
| P80723;P80723-2      | BASP1_HUMAN Brain acid soluble protein 1 OS=Homo sapiens GN=BASP1 PE=1 SV=2;>sp P80723-2 BASP1_HUMAN Isoform 2 of Bra    | 9.46E-14  |          |
| P80748               | LV302_HUMAN Ig lambda chain V-III region LOI OS=Homo sapiens PE=1 SV=1                                                   | 6.31E-88  |          |
| P81605               | DCD_HUMAN Dermcidin OS=Homo sapiens GN=DCD PE=1 SV=2                                                                     |           | 138.83   |
| P82094               | TMF1_HUMAN TATA element modulatory factor OS=Homo sapiens GN=TMF1 PE=1 SV=2                                              |           |          |
| P82094-2             | TMF1_HUMAN Isoform 2 of TATA element modulatory factor OS=Homo sapiens GN=TMF1                                           |           |          |
| P82094-2;P82094      | TMF1_HUMAN Isoform 2 of TATA element modulatory factor OS=Homo sapiens GN=TMF1;>sp P82094 TMF1_HUMAN TATA element        | 1.27E-34  |          |
| P82650               | RT22_HUMAN 28S ribosomal protein S22, mitochondrial OS=Homo sapiens GN=MRPS22 PE=1 SV=1                                  |           | 200.83   |
| P82663               | RT25_HUMAN 28S ribosomal protein S25, mitochondrial OS=Homo sapiens GN=MRPS25 PE=1 SV=1                                  |           | 86.51    |
| P82664               | RT10_HUMAN 28S ribosomal protein S10, mitochondrial OS=Homo sapiens GN=MRPS10 PE=1 SV=2                                  |           | 34.76    |
| P82673               | RT35_HUMAN 28S ribosomal protein S35, mitochondrial OS=Homo sapiens GN=MRPS35 PE=1 SV=1                                  |           | 156.75   |

|                               |                                                                                                                      |            |        |
|-------------------------------|----------------------------------------------------------------------------------------------------------------------|------------|--------|
| P82673-2                      | RT35_HUMAN Isoform 2 of 28S ribosomal protein S35, mitochondrial OS=Homo sapiens GN=MRPS35                           |            | 126.15 |
| P82673;C9JQV1;P82673-2        | RT35_HUMAN 28S ribosomal protein S35, mitochondrial OS=Homo sapiens GN=MRPS35 PE=1 SV=1;>tr C9JQV1 C9JQV1_HUMAN Un   | 2.31E-21   |        |
| P82675                        | RT05_HUMAN 28S ribosomal protein S5, mitochondrial OS=Homo sapiens GN=MRPS5 PE=1 SV=2                                |            | 182.84 |
| P82675-2                      | RT05_HUMAN Isoform 2 of 28S ribosomal protein S5, mitochondrial OS=Homo sapiens GN=MRPS5                             |            | 139.95 |
| P82675;B4DIW8;P82675-2        | RT05_HUMAN 28S ribosomal protein S5, mitochondrial OS=Homo sapiens GN=MRPS5 PE=1 SV=2;>tr B4DIW8 B4DIW8_HUMAN cDN    | 2.63E-25   |        |
| P82909                        | RT36_HUMAN 28S ribosomal protein S36, mitochondrial OS=Homo sapiens GN=MRPS36 PE=1 SV=2                              |            | 133.49 |
| P82912                        | RT11_HUMAN 28S ribosomal protein S11, mitochondrial OS=Homo sapiens GN=MRPS11 PE=1 SV=2                              |            | 76.37  |
| P82912-2                      | RT11_HUMAN Isoform 2 of 28S ribosomal protein S11, mitochondrial OS=Homo sapiens GN=MRPS11                           |            | 76.37  |
| P82912-3                      | RT11_HUMAN Isoform 3 of 28S ribosomal protein S11, mitochondrial OS=Homo sapiens GN=MRPS11                           |            | 29.36  |
| P82912;P82912-2               | RT11_HUMAN 28S ribosomal protein S11, mitochondrial OS=Homo sapiens GN=MRPS11 PE=1 SV=2;>sp P82912-2 RT11_HUMAN Iso  | 1.94E-10   |        |
| P82914                        | RT15_HUMAN 28S ribosomal protein S15, mitochondrial OS=Homo sapiens GN=MRPS15 PE=1 SV=1                              |            | 171.62 |
| P82921                        | RT21_HUMAN 28S ribosomal protein S21, mitochondrial OS=Homo sapiens GN=MRPS21 PE=1 SV=2                              |            |        |
| P82930                        | RT34_HUMAN 28S ribosomal protein S34, mitochondrial OS=Homo sapiens GN=MRPS34 PE=1 SV=2                              |            | 180.86 |
| P82932                        | RT06_HUMAN 28S ribosomal protein S6, mitochondrial OS=Homo sapiens GN=MRPS6 PE=1 SV=3                                |            | 76.91  |
| P82933                        | RT09_HUMAN 28S ribosomal protein S9, mitochondrial OS=Homo sapiens GN=MRPS9 PE=1 SV=2                                |            | 138.26 |
| P82979                        | SARNP_HUMAN SAP domain-containing ribonucleoprotein OS=Homo sapiens GN=SARNP PE=1 SV=3                               |            | 255.93 |
| P82980                        | RET5_HUMAN Retinol-binding protein 5 OS=Homo sapiens GN=RBP5 PE=1 SV=3                                               | 0.00016687 |        |
| P83111                        | LACTB_HUMAN beta-lactamase-like protein LACTB, mitochondrial OS=Homo sapiens GN=LACTB PE=1 SV=2                      |            |        |
| P83111-2                      | LACTB_HUMAN Isoform 2 of Serine beta-lactamase-like protein LACTB, mitochondrial OS=Homo sapiens GN=LACTB            |            |        |
| P83436                        | COG7_HUMAN Conserved oligomeric Golgi complex subunit 7 OS=Homo sapiens GN=COG7 PE=1 SV=1                            | 1.27E-05   |        |
| P83731                        | RL24_HUMAN 60S ribosomal protein L24 OS=Homo sapiens GN=RPL24 PE=1 SV=1                                              |            | 545.14 |
| P83876                        | TXN4A_HUMAN Thioredoxin-like protein 4A OS=Homo sapiens GN=TXNL4A PE=1 SV=1                                          |            | 266.34 |
| P83881                        | RL36A_HUMAN 60S ribosomal protein L36a OS=Homo sapiens GN=RPL36A PE=1 SV=2                                           |            | 145.77 |
| P83916                        | CBX1_HUMAN Chromobox protein homolog 1 OS=Homo sapiens GN=CBX1 PE=1 SV=1                                             |            | 743.83 |
| P84022;Q15796;Q15796-2        | SMAD3_HUMAN Mothers against decapentaplegic homolog 3 OS=Homo sapiens GN=SMAD3 PE=1 SV=1;>sp Q15796 SMAD2_HUMAN      | 1.90E-17   |        |
| P84074                        | HPCA_HUMAN Neuron-specific calcium-binding protein hippocalcin OS=Homo sapiens GN=HPCA PE=1 SV=2                     |            | 198.98 |
| P84077                        | ARF1_HUMAN ADP-ribosylation factor 1 OS=Homo sapiens GN=ARF1 PE=1 SV=2                                               |            | 857.87 |
| P84085                        | ARF5_HUMAN ADP-ribosylation factor 5 OS=Homo sapiens GN=ARF5 PE=1 SV=2                                               |            | 417.44 |
| P84090                        | ERH_HUMAN Enhancer of rudimentary homolog OS=Homo sapiens GN=ERH PE=1 SV=1                                           |            | 142.95 |
| P84095                        | RHOG_HUMAN Rho-related GTP-binding protein RhoG OS=Homo sapiens GN=RHOG PE=1 SV=1                                    |            | 398.48 |
| P84098                        | RL19_HUMAN 60S ribosomal protein L19 OS=Homo sapiens GN=RPL19 PE=1 SV=1                                              |            | 430.13 |
| P84103                        | SRSF3_HUMAN Serine/arginine-rich splicing factor 3 OS=Homo sapiens GN=SRSF3 PE=1 SV=1                                |            | 289.26 |
| P84157                        | MXRA7_HUMAN Matrix-remodeling-associated protein 7 OS=Homo sapiens GN=MXRA7 PE=1 SV=1                                |            |        |
| P84157-2                      | MXRA7_HUMAN Isoform 2 of Matrix-remodeling-associated protein 7 OS=Homo sapiens GN=MXRA7                             |            |        |
| P84157-2;P84157;P84157-2      | MXRA7_HUMAN Isoform 2 of Matrix-remodeling-associated protein 7 OS=Homo sapiens GN=MXRA7;>sp P84157 MXRA7_HUMAN M    | 1.79E-100  |        |
| P84157-3                      | MXRA7_HUMAN Isoform 3 of Matrix-remodeling-associated protein 7 OS=Homo sapiens GN=MXRA7                             |            |        |
| P84157;P84157-3;P84157-3      | MXRA7_HUMAN Matrix-remodeling-associated protein 7 OS=Homo sapiens GN=MXRA7 PE=1 SV=1;>sp P84157-3 MXRA7_HUMAN Iso   | 4.60E-13   |        |
| P84243                        | H33_HUMAN Histone H3.3 OS=Homo sapiens GN=H3F3A PE=1 SV=2                                                            |            | 180.26 |
| P84550;P84550-3;P84550-3      | SKOR1_HUMAN SKI family transcriptional corepressor 1 OS=Homo sapiens GN=SKOR1 PE=1 SV=1;>sp P84550-3 SKOR1_HUMAN Iso | 8.17E-06   |        |
| P85037;B4DY33;A4D1Z4;A4D1Z4-2 | FOXK1_HUMAN Forkhead box protein K1 OS=Homo sapiens GN=FOXK1 PE=1 SV=1;>tr B4DY33 B4DY33_HUMAN cDNA FLJ55600, hi     | 9.14E-28   |        |
| P85299                        | PRR5_HUMAN Proline-rich protein 5 OS=Homo sapiens GN=PRR5 PE=1 SV=1                                                  |            |        |
| P85299-2                      | PRR5_HUMAN Isoform 2 of Proline-rich protein 5 OS=Homo sapiens GN=PRR5                                               |            |        |
| P85299-3                      | PRR5_HUMAN Isoform 3 of Proline-rich protein 5 OS=Homo sapiens GN=PRR5                                               |            |        |
| P85299-4                      | PRR5_HUMAN Isoform 4 of Proline-rich protein 5 OS=Homo sapiens GN=PRR5                                               |            |        |
| P86790;P86791                 | CCZ1L_HUMAN Vacuolar fusion protein CCZ1 homolog-like OS=Homo sapiens GN=C7orf28B PE=1 SV=1;>sp P86791 CCZ1_HUMAN V  | 6.41E-10   |        |
| P98095-2;P98095               | FBLN2_HUMAN Isoform 2 of Fibulin-2 OS=Homo sapiens GN=FBLN2;>sp P98095 FBLN2_HUMAN Fibulin-2 OS=Homo sapiens GN=F    | 1.05E-206  |        |
| P98160                        | PGBM_HUMAN Basement membrane-specific heparan sulfate proteoglycan core protein OS=Homo sapiens GN=HSPG2 PE=1 SV=4   | 0          |        |
| P98161                        | PKD1_HUMAN Polycystin-1 OS=Homo sapiens GN=PKD1 PE=1 SV=3                                                            |            | 28.88  |
| P98161-2                      | PKD1_HUMAN Isoform 2 of Polycystin-1 OS=Homo sapiens GN=PKD1                                                         |            | 28.88  |
| P98161-3                      | PKD1_HUMAN Isoform 3 of Polycystin-1 OS=Homo sapiens GN=PKD1                                                         |            | 28.88  |
| P98164                        | LRP2_HUMAN Low-density lipoprotein receptor-related protein 2 OS=Homo sapiens GN=LRP2 PE=1 SV=3                      |            |        |
| P98171                        | RHG04_HUMAN Rho GTPase-activating protein 4 OS=Homo sapiens GN=ARHGAP4 PE=1 SV=2                                     | 6.92E-20   |        |
| P98173                        | FAM3A_HUMAN Protein FAM3A OS=Homo sapiens GN=FAM3A PE=1 SV=2                                                         |            | 35.06  |
| P98175                        | RBM10_HUMAN RNA-binding protein 10 OS=Homo sapiens GN=RBM10 PE=1 SV=3                                                |            | 46.24  |
| P98175-2                      | RBM10_HUMAN Isoform 2 of RNA-binding protein 10 OS=Homo sapiens GN=RBM10                                             |            | 46.24  |
| P98175-3                      | RBM10_HUMAN Isoform 3 of RNA-binding protein 10 OS=Homo sapiens GN=RBM10                                             |            | 46.24  |
| P98175-4                      | RBM10_HUMAN Isoform 4 of RNA-binding protein 10 OS=Homo sapiens GN=RBM10                                             |            | 46.24  |
| P98177                        | FOXO4_HUMAN Forkhead box protein O4 OS=Homo sapiens GN=FOXO4 PE=1 SV=5                                               |            | 21.17  |
| P98177-2                      | FOXO4_HUMAN Isoform Zeta of Forkhead box protein O4 OS=Homo sapiens GN=FOXO4                                         |            | 21.17  |
| P98179                        | RBM3_HUMAN Putative RNA-binding protein 3 OS=Homo sapiens GN=RBM3 PE=1 SV=1                                          |            | 534.76 |
| P99999                        | CYC_HUMAN Cytochrome c OS=Homo sapiens GN=CYCS PE=1 SV=2                                                             |            | 393.93 |



|                         |                                                                                                                                     |          |         |
|-------------------------|-------------------------------------------------------------------------------------------------------------------------------------|----------|---------|
| Q00005                  | 2ABB_HUMAN Serine/threonine-protein phosphatase 2A 55 kDa regulatory subunit B beta isoform OS=Homo sapiens GN=PPP2R2B PE=1 SV=1    |          | 64.4    |
| Q00005-2                | 2ABB_HUMAN Isoform 2 of Serine/threonine-protein phosphatase 2A 55 kDa regulatory subunit B beta isoform OS=Homo sapiens GN=PPP2R2B |          | 64.4    |
| Q00005-3                | 2ABB_HUMAN Isoform 3 of Serine/threonine-protein phosphatase 2A 55 kDa regulatory subunit B beta isoform OS=Homo sapiens GN=PPP2R2B |          | 64.4    |
| Q00005-4                | 2ABB_HUMAN Isoform 4 of Serine/threonine-protein phosphatase 2A 55 kDa regulatory subunit B beta isoform OS=Homo sapiens GN=PPP2R2B |          | 64.4    |
| Q00005-5                | 2ABB_HUMAN Isoform 5 of Serine/threonine-protein phosphatase 2A 55 kDa regulatory subunit B beta isoform OS=Homo sapiens GN=PPP2R2B |          | 64.4    |
| Q00005-5;Q00005-4;Q6615 | 2ABB_HUMAN Isoform 5 of Serine/threonine-protein phosphatase 2A 55 kDa regulatory subunit B beta isoform OS=Homo sapiens G          | 1.73E-45 |         |
| Q00059                  | TFAM_HUMAN Transcription factor A, mitochondrial OS=Homo sapiens GN=TFAM PE=1 SV=1                                                  |          | 463.54  |
| Q00169                  | PIPNA_HUMAN Phosphatidylinositol transfer protein alpha isoform OS=Homo sapiens GN=PITPNA PE=1 SV=2                                 | 4.26E-08 |         |
| Q00266                  | METK1_HUMAN S-adenosylmethionine synthase isoform type-1 OS=Homo sapiens GN=MAT1A PE=1 SV=2                                         |          | 37.34   |
| Q00325                  | MPCP_HUMAN Phosphate carrier protein, mitochondrial OS=Homo sapiens GN=SLC25A3 PE=1 SV=2                                            |          | 959.16  |
| Q00325-2                | MPCP_HUMAN Isoform B of Phosphate carrier protein, mitochondrial OS=Homo sapiens GN=SLC25A3                                         |          | 1020.63 |
| Q00325-2;Q00325         | 2 MPCP_HUMAN Isoform B of Phosphate carrier protein, mitochondrial OS=Homo sapiens GN=SLC25A3;>sp Q00325 MPCP_HUMAN PI              | 0        |         |
| Q00325;Q00325-2         | MPCP_HUMAN Phosphate carrier protein, mitochondrial OS=Homo sapiens GN=SLC25A3 PE=1 SV=2;>sp Q00325-2 MPCP_HUMAN Is                 | 9.06E-65 |         |
| Q00341                  | VIGLN_HUMAN Vigilin OS=Homo sapiens GN=HDLBP PE=1 SV=2                                                                              |          | 831.84  |
| Q00403                  | TF2B_HUMAN Transcription initiation factor IIB OS=Homo sapiens GN=GTF2B PE=1 SV=1                                                   | 3.42E-09 |         |
| Q00526                  | CDK3_HUMAN Cyclin-dependent kinase 3 OS=Homo sapiens GN=CDK3 PE=1 SV=1                                                              |          | 143.28  |
| Q00532                  | CDKL1_HUMAN Cyclin-dependent kinase-like 1 OS=Homo sapiens GN=CDKL1 PE=2 SV=5                                                       |          | 29.48   |
| Q00532-2                | CDKL1_HUMAN Isoform 2 of Cyclin-dependent kinase-like 1 OS=Homo sapiens GN=CDKL1                                                    |          | 50.82   |
| Q00534                  | CDK6_HUMAN Cyclin-dependent kinase 6 OS=Homo sapiens GN=CDK6 PE=1 SV=1                                                              |          | 53.46   |
| Q00535                  | CDK5_HUMAN Cyclin-dependent kinase 5 OS=Homo sapiens GN=CDK5 PE=1 SV=3                                                              |          | 51.25   |
| Q00535;Q6IAW3;A1XKG3    | CDK5_HUMAN Cell division protein kinase 5 OS=Homo sapiens GN=CDK5 PE=1 SV=3;>tr Q6IAW3 Q6IAW3_HUMAN CDK5 protein OS                 | 6.41E-17 |         |
| Q00536                  | CDK16_HUMAN Cyclin-dependent kinase 16 OS=Homo sapiens GN=CDK16 PE=1 SV=1                                                           |          | 54.92   |
| Q00537                  | CDK17_HUMAN Cyclin-dependent kinase 17 OS=Homo sapiens GN=CDK17 PE=1 SV=2                                                           |          | 53.66   |
| Q00577                  | PURA_HUMAN Transcriptional activator protein Pur-alpha OS=Homo sapiens GN=PURA PE=1 SV=2                                            |          | 125.45  |
| Q00610                  | CLH1_HUMAN Clathrin heavy chain 1 OS=Homo sapiens GN=CLTC PE=1 SV=5                                                                 |          | 5321.31 |
| Q00610-2                | CLH1_HUMAN Isoform 2 of Clathrin heavy chain 1 OS=Homo sapiens GN=CLTC                                                              |          | 5321.31 |
| Q00610;Q00610-2         | CLH1_HUMAN Clathrin heavy chain 1 OS=Homo sapiens GN=CLTC PE=1 SV=5;>sp Q00610-2 CLH1_HUMAN Isoform 2 of Clathrin hea               | 0        |         |
| Q00613;Q00613-2         | HSF1_HUMAN Heat shock factor protein 1 OS=Homo sapiens GN=HSF1 PE=1 SV=1;>sp Q00613-2 HSF1_HUMAN Isoform Short of He                | 6.65E-14 |         |
| Q00653;Q00653-4         | NFKB2_HUMAN Nuclear factor NF-kappa-B p100 subunit OS=Homo sapiens GN=NFKB2 PE=1 SV=4;>sp Q00653-4 NFKB2_HUMAN Is                   | 2.37E-16 |         |
| Q00688                  | FKBP3_HUMAN Peptidyl-prolyl cis-trans isomerase FKBP3 OS=Homo sapiens GN=FKBP3 PE=1 SV=1                                            |          | 631.08  |
| Q00722                  | PLCB2_HUMAN 1-phosphatidylinositol-4,5-bisphosphate phosphodiesterase beta-2 OS=Homo sapiens GN=PLCB2 PE=1 SV=2                     |          |         |
| Q00722-2                | PLCB2_HUMAN Isoform 2 of 1-phosphatidylinositol-4,5-bisphosphate phosphodiesterase beta-2 OS=Homo sapiens GN=PLCB2                  |          |         |
| Q00765                  | REEP5_HUMAN Receptor expression-enhancing protein 5 OS=Homo sapiens GN=REEP5 PE=1 SV=3                                              |          | 167.36  |
| Q00796                  | DHSO_HUMAN Sorbitol dehydrogenase OS=Homo sapiens GN=SORD PE=1 SV=4                                                                 |          | 61.15   |
| Q00839                  | HNRPU_HUMAN Heterogeneous nuclear ribonucleoprotein U OS=Homo sapiens GN=HNRNPU PE=1 SV=6                                           |          | 1225.18 |
| Q00839-2                | HNRPU_HUMAN Isoform Short of Heterogeneous nuclear ribonucleoprotein U OS=Homo sapiens GN=HNRNPU                                    |          | 1165.2  |
| Q00839-2;B4DLR3         | 2 HNRPU_HUMAN Isoform Short of Heterogeneous nuclear ribonucleoprotein U OS=Homo sapiens GN=HNRNPU;>tr B4DLR3 B4DLR3_               | 0        |         |
| Q00839;B3KX72;Q5RI17;   | HNRPU_HUMAN Heterogeneous nuclear ribonucleoprotein U OS=Homo sapiens GN=HNRNPU PE=1 SV=6;>tr B3KX72 B3KX72_HUMAN                   | 0        |         |
| Q00858                  | ECT2L_HUMAN Epithelial cell-transforming sequence 2 oncogene-like OS=Homo sapiens GN=ECT2L PE=2 SV=2                                | 2.57E-05 |         |
| Q00973                  | B4GN1_HUMAN Beta-1,4 N-acetylgalactosaminyltransferase 1 OS=Homo sapiens GN=B4GALNT1 PE=1 SV=2                                      |          |         |
| Q00978                  | IRF9_HUMAN Interferon regulatory factor 9 OS=Homo sapiens GN=IRF9 PE=1 SV=1                                                         | 1.09E-06 |         |
| Q01064                  | PDE1B_HUMAN Calcium/calmodulin-dependent 3',5'-cyclic nucleotide phosphodiesterase 1B OS=Homo sapiens GN=PDE1B PE=1 SV=2            |          | 31.06   |
| Q01064-2                | PDE1B_HUMAN Isoform PDE1B2 of Calcium/calmodulin-dependent 3',5'-cyclic nucleotide phosphodiesterase 1B OS=Homo sapiens GN=PDE1B    |          | 31.06   |
| Q01081                  | U2AF1_HUMAN Splicing factor U2AF 35 kDa subunit OS=Homo sapiens GN=U2AF1 PE=1 SV=3                                                  |          | 362.42  |
| Q01082                  | SPTB2_HUMAN Spectrin beta chain, brain 1 OS=Homo sapiens GN=SPTBN1 PE=1 SV=2                                                        |          | 5364.1  |
| Q01082-2                | SPTB2_HUMAN Isoform Short of Spectrin beta chain, brain 1 OS=Homo sapiens GN=SPTBN1                                                 |          | 4959.09 |
| Q01082-3                | SPTB2_HUMAN Isoform 2 of Spectrin beta chain, brain 1 OS=Homo sapiens GN=SPTBN1                                                     |          | 4949.69 |
| Q01082;Q01082-2         | SPTB2_HUMAN Spectrin beta chain, brain 1 OS=Homo sapiens GN=SPTBN1 PE=1 SV=2;>sp Q01082-2 SPTB2_HUMAN Isoform Short                 | 0        |         |
| Q01085                  | TIAR_HUMAN Nucleolysin TIAR OS=Homo sapiens GN=TIAL1 PE=1 SV=1                                                                      |          | 106.46  |
| Q01105                  | SET_HUMAN Protein SET OS=Homo sapiens GN=SET PE=1 SV=3                                                                              |          | 539.66  |
| Q01105-2                | SET_HUMAN Isoform 2 of Protein SET OS=Homo sapiens GN=SET                                                                           |          | 515.14  |
| Q01105-2;Q01105         | 2 SET_HUMAN Isoform 2 of Protein SET OS=Homo sapiens GN=SET;>sp Q01105 SET_HUMAN Protein SET OS=Homo sapiens GN=SE                  | 3.16E-84 |         |
| Q01130                  | SRSF2_HUMAN Serine/arginine-rich splicing factor 2 OS=Homo sapiens GN=SRSF2 PE=1 SV=4                                               |          | 432.78  |
| Q01196                  | RUNX1_HUMAN Runt-related transcription factor 1 OS=Homo sapiens GN=RUNX1 PE=1 SV=3                                                  |          |         |
| Q01196-10               | RUNX1_HUMAN Isoform AML-1I of Runt-related transcription factor 1 OS=Homo sapiens GN=RUNX1                                          |          |         |
| Q01196-11               | RUNX1_HUMAN Isoform AML-1L of Runt-related transcription factor 1 OS=Homo sapiens GN=RUNX1                                          |          |         |
| Q01196-2                | RUNX1_HUMAN Isoform AML-1A of Runt-related transcription factor 1 OS=Homo sapiens GN=RUNX1                                          |          |         |
| Q01196-3                | RUNX1_HUMAN Isoform AML-1C of Runt-related transcription factor 1 OS=Homo sapiens GN=RUNX1                                          |          |         |
| Q01196-4                | RUNX1_HUMAN Isoform AML-1E of Runt-related transcription factor 1 OS=Homo sapiens GN=RUNX1                                          |          |         |
| Q01196-5                | RUNX1_HUMAN Isoform AML-1FA of Runt-related transcription factor 1 OS=Homo sapiens GN=RUNX1                                         |          |         |
| Q01196-6                | RUNX1_HUMAN Isoform AML-1FB of Runt-related transcription factor 1 OS=Homo sapiens GN=RUNX1                                         |          |         |



|                          |                                                                                                                                                                                                                        |           |        |
|--------------------------|------------------------------------------------------------------------------------------------------------------------------------------------------------------------------------------------------------------------|-----------|--------|
| Q01196-7                 | RUNX1_HUMAN Isoform AML-1FC of Runt-related transcription factor 1 OS=Homo sapiens GN=RUNX1                                                                                                                            |           |        |
| Q01196-8                 | RUNX1_HUMAN Isoform AML-1G of Runt-related transcription factor 1 OS=Homo sapiens GN=RUNX1                                                                                                                             |           |        |
| Q01196-9                 | RUNX1_HUMAN Isoform AML-1H of Runt-related transcription factor 1 OS=Homo sapiens GN=RUNX1                                                                                                                             |           |        |
| Q01432;Q01432-3          | AMPD3_HUMAN AMP deaminase 3 OS=Homo sapiens GN=AMPD3 PE=1 SV=1;>sp Q01432-3 AMPD3_HUMAN Isoform 1C of AMP deaminase 3 OS=Homo sapiens GN=AMPD3 PE=1 SV=1                                                               | 1.55E-07  |        |
| Q01433;Q01433-2;Q01433-3 | AMPD2_HUMAN AMP deaminase 2 OS=Homo sapiens GN=AMPD2 PE=1 SV=2;>sp Q01433-2 AMPD2_HUMAN Isoform Ex1A-2-3 of AMP deaminase 2 OS=Homo sapiens GN=AMPD2 PE=1 SV=2                                                         | 1.95E-14  |        |
| Q01469                   | FABP5_HUMAN Fatty acid-binding protein, epidermal OS=Homo sapiens GN=FABP5 PE=1 SV=3                                                                                                                                   |           | 50.99  |
| Q01484                   | ANK2_HUMAN Ankyrin-2 OS=Homo sapiens GN=ANK2 PE=1 SV=3                                                                                                                                                                 |           |        |
| Q01484-2                 | ANK2_HUMAN Isoform 2 of Ankyrin-2 OS=Homo sapiens GN=ANK2                                                                                                                                                              |           |        |
| Q01484-4                 | ANK2_HUMAN Isoform 3 of Ankyrin-2 OS=Homo sapiens GN=ANK2                                                                                                                                                              |           |        |
| Q01484-4;Q01484;Q01484-5 | ANK2_HUMAN Isoform 3 of Ankyrin-2 OS=Homo sapiens GN=ANK2;>sp Q01484 ANK2_HUMAN Ankyrin-2 OS=Homo sapiens GN=ANK2                                                                                                      | 1.18E-10  |        |
| Q01484-5                 | ANK2_HUMAN Isoform 4 of Ankyrin-2 OS=Homo sapiens GN=ANK2                                                                                                                                                              |           |        |
| Q01518                   | CAP1_HUMAN Adenylyl cyclase-associated protein 1 OS=Homo sapiens GN=CAP1 PE=1 SV=5                                                                                                                                     |           | 396.72 |
| Q01518-2                 | CAP1_HUMAN Isoform 2 of Adenylyl cyclase-associated protein 1 OS=Homo sapiens GN=CAP1                                                                                                                                  |           | 300.33 |
| Q01518;Q01518-2          | CAP1_HUMAN Adenylyl cyclase-associated protein 1 OS=Homo sapiens GN=CAP1 PE=1 SV=5;>sp Q01518-2 CAP1_HUMAN Isoform 2 of Adenylyl cyclase-associated protein 1 OS=Homo sapiens GN=CAP1 PE=1 SV=5                        | 0         |        |
| Q01546                   | K220_HUMAN Keratin, type II cytoskeletal 2 oral OS=Homo sapiens GN=KRT76 PE=1 SV=2                                                                                                                                     |           | 431.38 |
| Q01581                   | HMCS1_HUMAN Hydroxymethylglutaryl-CoA synthase, cytoplasmic OS=Homo sapiens GN=HMCS1 PE=1 SV=2                                                                                                                         | 2.55E-88  |        |
| Q01628                   | IFM3_HUMAN Interferon-induced transmembrane protein 3 OS=Homo sapiens GN=IFITM3 PE=1 SV=2                                                                                                                              |           | 202.65 |
| Q01629                   | IFM2_HUMAN Interferon-induced transmembrane protein 2 OS=Homo sapiens GN=IFITM2 PE=1 SV=2                                                                                                                              |           | 202.65 |
| Q01650                   | LAT1_HUMAN Large neutral amino acids transporter small subunit 1 OS=Homo sapiens GN=SLC7A5 PE=1 SV=2                                                                                                                   |           | 331.76 |
| Q01658                   | NC2B_HUMAN Protein Dr1 OS=Homo sapiens GN=DR1 PE=1 SV=1                                                                                                                                                                |           | 108.48 |
| Q01780                   | EXOSX_HUMAN Exosome component 10 OS=Homo sapiens GN=EXOSC10 PE=1 SV=2                                                                                                                                                  |           | 66.23  |
| Q01780-2                 | EXOSX_HUMAN Isoform 2 of Exosome component 10 OS=Homo sapiens GN=EXOSC10                                                                                                                                               |           | 66.23  |
| Q01780;Q01780-2          | EXOSX_HUMAN Exosome component 10 OS=Homo sapiens GN=EXOSC10 PE=1 SV=2;>sp Q01780-2 EXOSX_HUMAN Isoform 2 of Exosome component 10 OS=Homo sapiens GN=EXOSC10 PE=1 SV=2                                                  | 2.00E-17  |        |
| Q01804                   | OTUD4_HUMAN OTU domain-containing protein 4 OS=Homo sapiens GN=OTUD4 PE=1 SV=3                                                                                                                                         |           | 39.12  |
| Q01804-2                 | OTUD4_HUMAN Isoform 2 of OTU domain-containing protein 4 OS=Homo sapiens GN=OTUD4                                                                                                                                      |           | 38.47  |
| Q01804-3                 | OTUD4_HUMAN Isoform 3 of OTU domain-containing protein 4 OS=Homo sapiens GN=OTUD4                                                                                                                                      |           | 0.65   |
| Q01804;Q01804-3;Q01804-4 | OTUD4_HUMAN OTU domain-containing protein 4 OS=Homo sapiens GN=OTUD4 PE=1 SV=3;>sp Q01804-3 OTUD4_HUMAN Isoform 3 of OTU domain-containing protein 4 OS=Homo sapiens GN=OTUD4 PE=1 SV=3                                | 2.41E-08  |        |
| Q01813                   | K6PP_HUMAN 6-phosphofructokinase type C OS=Homo sapiens GN=PFKP PE=1 SV=2                                                                                                                                              |           | 370.72 |
| Q01814                   | AT2B2_HUMAN Plasma membrane calcium-transporting ATPase 2 OS=Homo sapiens GN=ATP2B2 PE=1 SV=2                                                                                                                          |           | 368.6  |
| Q01814-2                 | AT2B2_HUMAN Isoform WA of Plasma membrane calcium-transporting ATPase 2 OS=Homo sapiens GN=ATP2B2                                                                                                                      |           | 316.94 |
| Q01814-3                 | AT2B2_HUMAN Isoform YA of Plasma membrane calcium-transporting ATPase 2 OS=Homo sapiens GN=ATP2B2                                                                                                                      |           | 316.94 |
| Q01814-4                 | AT2B2_HUMAN Isoform ZA of Plasma membrane calcium-transporting ATPase 2 OS=Homo sapiens GN=ATP2B2                                                                                                                      |           | 316.94 |
| Q01814-5                 | AT2B2_HUMAN Isoform YB of Plasma membrane calcium-transporting ATPase 2 OS=Homo sapiens GN=ATP2B2                                                                                                                      |           | 368.6  |
| Q01814-6                 | AT2B2_HUMAN Isoform ZB of Plasma membrane calcium-transporting ATPase 2 OS=Homo sapiens GN=ATP2B2                                                                                                                      |           | 368.6  |
| Q01814-7                 | AT2B2_HUMAN Isoform XA of Plasma membrane calcium-transporting ATPase 2 OS=Homo sapiens GN=ATP2B2                                                                                                                      |           | 316.94 |
| Q01814-8                 | AT2B2_HUMAN Isoform XB of Plasma membrane calcium-transporting ATPase 2 OS=Homo sapiens GN=ATP2B2                                                                                                                      |           | 368.6  |
| Q01814;Q01814-5;Q01814-6 | AT2B2_HUMAN Plasma membrane calcium-transporting ATPase 2 OS=Homo sapiens GN=ATP2B2 PE=1 SV=2;>sp Q01814-5 AT2B2_HUMAN Isoform YB of Plasma membrane calcium-transporting ATPase 2 OS=Homo sapiens GN=ATP2B2 PE=1 SV=2 | 1.46E-54  |        |
| Q01844                   | EWS_HUMAN RNA-binding protein EWS OS=Homo sapiens GN=EWSR1 PE=1 SV=1                                                                                                                                                   |           | 40.35  |
| Q01844-2                 | EWS_HUMAN Isoform EWS-B of RNA-binding protein EWS OS=Homo sapiens GN=EWSR1                                                                                                                                            |           | 40.35  |
| Q01844;Q01844-2          | EWS_HUMAN RNA-binding protein EWS OS=Homo sapiens GN=EWSR1 PE=1 SV=1;>sp Q01844-2 EWS_HUMAN Isoform EWS-B of RNA-binding protein EWS OS=Homo sapiens GN=EWSR1 PE=1 SV=1                                                | 1.17E-90  |        |
| Q01968                   | OCRL_HUMAN Inositol polyphosphate 5-phosphatase OCRL-1 OS=Homo sapiens GN=OCRL PE=1 SV=3                                                                                                                               |           | 33.65  |
| Q01968-2                 | OCRL_HUMAN Isoform B of Inositol polyphosphate 5-phosphatase OCRL-1 OS=Homo sapiens GN=OCRL                                                                                                                            |           | 33.65  |
| Q01970                   | PLCB3_HUMAN 1-phosphatidylinositol-4,5-bisphosphate phosphodiesterase beta-3 OS=Homo sapiens GN=PLCB3 PE=1 SV=2                                                                                                        |           | 147.63 |
| Q01973                   | ROR1_HUMAN Tyrosine-protein kinase transmembrane receptor ROR1 OS=Homo sapiens GN=ROR1 PE=2 SV=2                                                                                                                       |           | 32.09  |
| Q01973-2                 | ROR1_HUMAN Isoform Short of Tyrosine-protein kinase transmembrane receptor ROR1 OS=Homo sapiens GN=ROR1                                                                                                                |           | 16.32  |
| Q01995                   | TAGL_HUMAN Transgelin OS=Homo sapiens GN=TAGLN PE=1 SV=4                                                                                                                                                               | 0         |        |
| Q02040                   | AK17A_HUMAN A-kinase anchor protein 17A OS=Homo sapiens GN=AKAP17A PE=1 SV=2                                                                                                                                           |           |        |
| Q02040-2                 | AK17A_HUMAN Isoform 2 of A-kinase anchor protein 17A OS=Homo sapiens GN=AKAP17A                                                                                                                                        |           |        |
| Q02040-3                 | AK17A_HUMAN Isoform 3 of A-kinase anchor protein 17A OS=Homo sapiens GN=AKAP17A                                                                                                                                        |           |        |
| Q02040;Q02040-3;Q02040-4 | AK17A_HUMAN A-kinase anchor protein 17A OS=Homo sapiens GN=AKAP17A PE=1 SV=2;>sp Q02040-3 AK17A_HUMAN Isoform 3 of A-kinase anchor protein 17A OS=Homo sapiens GN=AKAP17A PE=1 SV=2                                    | 6.42E-116 |        |
| Q02083;Q02083-2;B4DVL    | NAAA_HUMAN N-acylethanolamine-hydrolyzing acid amidase OS=Homo sapiens GN=NAAA PE=1 SV=3;>sp Q02083-2 NAAA_HUMAN Isoform 1 of N-acylethanolamine-hydrolyzing acid amidase OS=Homo sapiens GN=NAAA PE=1 SV=3            | 7.59E-08  |        |
| Q02127                   | PYRD_HUMAN Dihydroorotate dehydrogenase, mitochondrial OS=Homo sapiens GN=DHODH PE=1 SV=3                                                                                                                              | 5.53E-24  |        |
| Q02156                   | KPCE_HUMAN Protein kinase C epsilon type OS=Homo sapiens GN=PRKCE PE=1 SV=1                                                                                                                                            |           |        |
| Q02218                   | ODO1_HUMAN 2-oxoglutarate dehydrogenase, mitochondrial OS=Homo sapiens GN=OGDH PE=1 SV=3                                                                                                                               |           | 133.85 |
| Q02224                   | CENPE_HUMAN Centromere-associated protein E OS=Homo sapiens GN=CENPE PE=1 SV=2                                                                                                                                         |           |        |
| Q02224-2                 | CENPE_HUMAN Isoform 2 of Centromere-associated protein E OS=Homo sapiens GN=CENPE                                                                                                                                      |           |        |
| Q02224-3                 | CENPE_HUMAN Isoform 3 of Centromere-associated protein E OS=Homo sapiens GN=CENPE                                                                                                                                      |           |        |
| Q02224;Q02224-2;Q02224-3 | CENPE_HUMAN Centromere-associated protein E OS=Homo sapiens GN=CENPE PE=1 SV=2;>sp Q02224-2 CENPE_HUMAN Isoform 2 of Centromere-associated protein E OS=Homo sapiens GN=CENPE PE=1 SV=2                                | 1.11E-08  |        |
| Q02241                   | KIF23_HUMAN Kinesin-like protein KIF23 OS=Homo sapiens GN=KIF23 PE=1 SV=3                                                                                                                                              |           | 95.09  |
| Q02241-2                 | KIF23_HUMAN Isoform 2 of Kinesin-like protein KIF23 OS=Homo sapiens GN=KIF23                                                                                                                                           |           | 95.09  |
| Q02241;Q02241-2          | KIF23_HUMAN Kinesin-like protein KIF23 OS=Homo sapiens GN=KIF23 PE=1 SV=3;>sp Q02241-2 KIF23_HUMAN Isoform 2 of Kinesin-like protein KIF23 OS=Homo sapiens GN=KIF23 PE=1 SV=3                                          | 1.98E-20  |        |

|                       |                                                                                                                         |          |        |
|-----------------------|-------------------------------------------------------------------------------------------------------------------------|----------|--------|
| Q02246                | CNTN2_HUMAN Contactin-2 OS=Homo sapiens GN=CNTN2 PE=1 SV=1                                                              |          |        |
| Q02252                | MMSA_HUMAN Methylmalonate-semialdehyde dehydrogenase [acylating], mitochondrial OS=Homo sapiens GN=ALDH6A1 PE=1 SV=2    |          |        |
| Q02338                | BDH_HUMAN D-beta-hydroxybutyrate dehydrogenase, mitochondrial OS=Homo sapiens GN=BDH1 PE=1 SV=3                         |          | 174.09 |
| Q02388;Q02388-2       | CO7A1_HUMAN Collagen alpha-1(VII) chain OS=Homo sapiens GN=COL7A1 PE=1 SV=2;>sp Q02388-2 CO7A1_HUMAN Isoform 2 of       | 1.32E-10 |        |
| Q02413                | DSG1_HUMAN Desmoglein-1 OS=Homo sapiens GN=DSG1 PE=1 SV=2                                                               |          |        |
| Q02487                | DSC2_HUMAN Desmocollin-2 OS=Homo sapiens GN=DSC2 PE=1 SV=1                                                              |          |        |
| Q02487-2              | DSC2_HUMAN Isoform 2B of Desmocollin-2 OS=Homo sapiens GN=DSC2                                                          |          |        |
| Q02539                | H11_HUMAN Histone H1.1 OS=Homo sapiens GN=HIST1H1A PE=1 SV=3                                                            |          | 175    |
| Q02543                | RL18A_HUMAN 60S ribosomal protein L18a OS=Homo sapiens GN=RPL18A PE=1 SV=2                                              |          | 583.5  |
| Q02750;Q02750-2       | MP2K1_HUMAN Dual specificity mitogen-activated protein kinase kinase 1 OS=Homo sapiens GN=MAP2K1 PE=1 SV=2;>sp Q02750-2 | 2.40E-08 |        |
| Q02779                | M3K10_HUMAN Mitogen-activated protein kinase kinase kinase 10 OS=Homo sapiens GN=MAP3K10 PE=1 SV=3                      |          |        |
| Q02790                | FKBP4_HUMAN Peptidyl-prolyl cis-trans isomerase FKBP4 OS=Homo sapiens GN=FKBP4 PE=1 SV=3                                |          | 110.71 |
| Q02809                | PLOD1_HUMAN Procollagen-lysine,2-oxoglutarate 5-dioxygenase 1 OS=Homo sapiens GN=PLOD1 PE=1 SV=2                        |          | 542.39 |
| Q02818                | NUCB1_HUMAN Nucleobindin-1 OS=Homo sapiens GN=NUCB1 PE=1 SV=4                                                           |          | 333.14 |
| Q02846                | GUC2D_HUMAN Retinal guanylyl cyclase 1 OS=Homo sapiens GN=GUCY2D PE=1 SV=2                                              |          |        |
| Q02878                | RL6_HUMAN 60S ribosomal protein L6 OS=Homo sapiens GN=RPL6 PE=1 SV=3                                                    |          | 845.68 |
| Q02880                | TOP2B_HUMAN DNA topoisomerase 2-beta OS=Homo sapiens GN=TOP2B PE=1 SV=3                                                 |          | 760.91 |
| Q02880-2              | TOP2B_HUMAN Isoform Beta-1 of DNA topoisomerase 2-beta OS=Homo sapiens GN=TOP2B                                         |          | 759.6  |
| Q02880;Q02880-2       | TOP2B_HUMAN DNA topoisomerase 2-beta OS=Homo sapiens GN=TOP2B PE=1 SV=3;>sp Q02880-2 TOP2B_HUMAN Isoform Beta-1         | 0        |        |
| Q02930                | CREB5_HUMAN Cyclic AMP-responsive element-binding protein 5 OS=Homo sapiens GN=CREB5 PE=1 SV=3                          |          | 32.95  |
| Q02930-2              | CREB5_HUMAN Isoform 2 of Cyclic AMP-responsive element-binding protein 5 OS=Homo sapiens GN=CREB5                       |          | 32.95  |
| Q02930-3              | CREB5_HUMAN Isoform 3 of Cyclic AMP-responsive element-binding protein 5 OS=Homo sapiens GN=CREB5                       |          | 32.95  |
| Q02930-4              | CREB5_HUMAN Isoform 4 of Cyclic AMP-responsive element-binding protein 5 OS=Homo sapiens GN=CREB5                       |          | 32.95  |
| Q02952;A6NEC7;Q02952- | AKA12_HUMAN A-kinase anchor protein 12 OS=Homo sapiens GN=AKAP12 PE=1 SV=4;>tr A6NEC7 A6NEC7_HUMAN Uncharacterized      | 1.41E-47 |        |
| Q02978                | M2OM_HUMAN Mitochondrial 2-oxoglutarate/malate carrier protein OS=Homo sapiens GN=SLC25A11 PE=1 SV=3                    |          | 250.13 |
| Q03001                | DYST_HUMAN Dystonin OS=Homo sapiens GN=DST PE=1 SV=4                                                                    |          | 229.79 |
| Q03001-10             | DYST_HUMAN Isoform 5 of Dystonin OS=Homo sapiens GN=DST                                                                 |          | 1.02   |
| Q03001-11;Q03001;Q5TB | 11 DYST_HUMAN Isoform 6 of Dystonin OS=Homo sapiens GN=DST;>sp Q03001 DYST_HUMAN Dystonin OS=Homo sapiens GN=DST        | 0        |        |
| Q03001-13             | DYST_HUMAN Isoform 8 of Dystonin OS=Homo sapiens GN=DST                                                                 |          | 55.13  |
| Q03001-3              | DYST_HUMAN Isoform 3 of Dystonin OS=Homo sapiens GN=DST                                                                 |          | 28.65  |
| Q03001-8              | DYST_HUMAN Isoform 2 of Dystonin OS=Homo sapiens GN=DST                                                                 |          | 175.29 |
| Q03001-9              | DYST_HUMAN Isoform 4 of Dystonin OS=Homo sapiens GN=DST                                                                 |          | 21.36  |
| Q03001;Q03001-8       | DYST_HUMAN Dystonin OS=Homo sapiens GN=DST PE=1 SV=4;>sp Q03001-8 DYST_HUMAN Isoform 2 of Dystonin OS=Homo sapie        | 0        |        |
| Q03013;Q03013-2       | GSTM4_HUMAN Glutathione S-transferase Mu 4 OS=Homo sapiens GN=GSTM4 PE=1 SV=3;>sp Q03013-2 GSTM4_HUMAN Isoform 2        | 6.92E-84 |        |
| Q03014                | HHEX_HUMAN Hematopoietically-expressed homeobox protein HHEX OS=Homo sapiens GN=HHEX PE=1 SV=1                          |          |        |
| Q03060-21             | CREM_HUMAN Isoform 18 of cAMP-responsive element modulator OS=Homo sapiens GN=CREM                                      |          | 18.55  |
| Q03060-6              | CREM_HUMAN Isoform 3 of cAMP-responsive element modulator OS=Homo sapiens GN=CREM                                       |          | 18.55  |
| Q03060-8              | CREM_HUMAN Isoform 6 of cAMP-responsive element modulator OS=Homo sapiens GN=CREM                                       |          | 18.55  |
| Q03060-9              | CREM_HUMAN Isoform 7 of cAMP-responsive element modulator OS=Homo sapiens GN=CREM                                       |          | 18.55  |
| Q03112                | EVI1_HUMAN MDS1 and EVI1 complex locus protein EVI1 OS=Homo sapiens GN=MECOM PE=1 SV=2                                  |          |        |
| Q03112-3              | EVI1_HUMAN Isoform 2 of MDS1 and EVI1 complex locus protein EVI1 OS=Homo sapiens GN=MECOM                               |          |        |
| Q03112-5              | EVI1_HUMAN Isoform 5 of MDS1 and EVI1 complex locus protein EVI1 OS=Homo sapiens GN=MECOM                               |          |        |
| Q03112-6              | EVI1_HUMAN Isoform 6 of MDS1 and EVI1 complex locus protein EVI1 OS=Homo sapiens GN=MECOM                               |          |        |
| Q03113                | GNA12_HUMAN Guanine nucleotide-binding protein subunit alpha-12 OS=Homo sapiens GN=GNA12 PE=1 SV=4                      |          | 85.18  |
| Q03135                | CAV1_HUMAN Caveolin-1 OS=Homo sapiens GN=CAV1 PE=1 SV=4                                                                 |          | 625.56 |
| Q03135-2              | CAV1_HUMAN Isoform Beta of Caveolin-1 OS=Homo sapiens GN=CAV1                                                           |          | 374.65 |
| Q03135;Q03135-2       | CAV1_HUMAN Caveolin-1 OS=Homo sapiens GN=CAV1 PE=1 SV=4;>sp Q03135-2 CAV1_HUMAN Isoform Beta of Caveolin-1 OS=Hon       | 2.39E-47 |        |
| Q03154                | ACY1_HUMAN Aminoacylase-1 OS=Homo sapiens GN=ACY1 PE=1 SV=1                                                             | 5.25E-09 |        |
| Q03164                | MLL1_HUMAN Histone-lysine N-methyltransferase MLL OS=Homo sapiens GN=MLL PE=1 SV=5                                      |          | 65.5   |
| Q03164-2              | MLL1_HUMAN Isoform 14P-18B of Histone-lysine N-methyltransferase MLL OS=Homo sapiens GN=MLL                             |          | 65.5   |
| Q03164;Q03164-2       | MLL1_HUMAN Histone-lysine N-methyltransferase MLL OS=Homo sapiens GN=MLL PE=1 SV=5;>sp Q03164-2 MLL1_HUMAN Isoform      | 6.74E-18 |        |
| Q03169                | TNAP2_HUMAN Tumor necrosis factor alpha-induced protein 2 OS=Homo sapiens GN=TNFAIP2 PE=1 SV=2                          |          | 113.17 |
| Q03188                | CENPC_HUMAN Centromere protein C 1 OS=Homo sapiens GN=CENPC1 PE=1 SV=2                                                  |          |        |
| Q03252                | LMNB2_HUMAN Lamin-B2 OS=Homo sapiens GN=LMNB2 PE=1 SV=3                                                                 |          | 115.85 |
| Q03405                | UPAR_HUMAN Urokinase plasminogen activator surface receptor OS=Homo sapiens GN=PLAUR PE=1 SV=1                          |          | 228.52 |
| Q03405-2              | UPAR_HUMAN Isoform 2 of Urokinase plasminogen activator surface receptor OS=Homo sapiens GN=PLAUR                       |          | 193    |
| Q03405-3              | UPAR_HUMAN Isoform 3 of Urokinase plasminogen activator surface receptor OS=Homo sapiens GN=PLAUR                       |          | 201.23 |
| Q03405;Q03405-2;Q9UPI | UPAR_HUMAN Urokinase plasminogen activator surface receptor OS=Homo sapiens GN=PLAUR PE=1 SV=1;>sp Q03405-2 UPAR_HUM    | 9.55E-07 |        |
| Q03426                | KIME_HUMAN Mevalonate kinase OS=Homo sapiens GN=MVK PE=1 SV=1                                                           | 2.54E-12 |        |
| Q03518                | TAP1_HUMAN Antigen peptide transporter 1 OS=Homo sapiens GN=TAP1 PE=1 SV=2                                              |          | 76.38  |
| Q03519                | TAP2_HUMAN Antigen peptide transporter 2 OS=Homo sapiens GN=TAP2 PE=1 SV=1                                              |          | 121.89 |

|                       |                                                                                                                          |           |        |
|-----------------------|--------------------------------------------------------------------------------------------------------------------------|-----------|--------|
| Q03519-2              | TAP2_HUMAN Isoform 2 of Antigen peptide transporter 2 OS=Homo sapiens GN=TAP2                                            |           | 121.89 |
| Q03519;Q03519-2       | TAP2_HUMAN Antigen peptide transporter 2 OS=Homo sapiens GN=TAP2 PE=1 SV=1;>sp Q03519-2 TAP2_HUMAN Isoform 2 of Antig    | 4.17E-18  |        |
| Q03591                | FHR1_HUMAN Complement factor H-related protein 1 OS=Homo sapiens GN=CFHR1 PE=1 SV=2                                      | 1.99E-72  |        |
| Q03701                | CEBPZ_HUMAN CCAAT/enhancer-binding protein zeta OS=Homo sapiens GN=CEBPZ PE=1 SV=3                                       |           |        |
| Q03938                | ZNF90_HUMAN Zinc finger protein 90 OS=Homo sapiens GN=ZNF90 PE=2 SV=3                                                    |           |        |
| Q03989                | ARI5A_HUMAN AT-rich interactive domain-containing protein 5A OS=Homo sapiens GN=ARID5A PE=2 SV=2                         |           |        |
| Q04118                | PRB3_HUMAN Basic salivary proline-rich protein 3 OS=Homo sapiens GN=PRB3 PE=1 SV=2                                       | 2.10E-09  |        |
| Q04206-3              | TF65_HUMAN Isoform 3 of Transcription factor p65 OS=Homo sapiens GN=RELA                                                 |           |        |
| Q04206;Q04206-4;Q0420 | TF65_HUMAN Transcription factor p65 OS=Homo sapiens GN=RELA PE=1 SV=2;>sp Q04206-4 TF65_HUMAN Isoform 4 of Transcriptic  | 5.15E-73  |        |
| Q04323                | UBXN1_HUMAN UBX domain-containing protein 1 OS=Homo sapiens GN=UBXN1 PE=1 SV=2                                           |           | 64.64  |
| Q04323-2              | UBXN1_HUMAN Isoform 2 of UBX domain-containing protein 1 OS=Homo sapiens GN=UBXN1                                        |           | 64.64  |
| Q04323-2;Q04323       | 2 UBXN1_HUMAN Isoform 2 of UBX domain-containing protein 1 OS=Homo sapiens GN=UBXN1;>sp Q04323 UBXN1_HUMAN UBX dor       | 1.01E-05  |        |
| Q04446                | GLGB_HUMAN 1,4-alpha-glucan-branching enzyme OS=Homo sapiens GN=GBE1 PE=1 SV=2                                           |           | 32.73  |
| Q04609                | FOLH1_HUMAN Glutamate carboxypeptidase 2 OS=Homo sapiens GN=FOLH1 PE=1 SV=1                                              |           |        |
| Q04609-3              | FOLH1_HUMAN Isoform PSMA-3 of Glutamate carboxypeptidase 2 OS=Homo sapiens GN=FOLH1                                      |           |        |
| Q04609-6              | FOLH1_HUMAN Isoform PSMA' of Glutamate carboxypeptidase 2 OS=Homo sapiens GN=FOLH1                                       |           |        |
| Q04609-7              | FOLH1_HUMAN Isoform PSMA-7 of Glutamate carboxypeptidase 2 OS=Homo sapiens GN=FOLH1                                      |           |        |
| Q04609-8              | FOLH1_HUMAN Isoform PSMA-8 of Glutamate carboxypeptidase 2 OS=Homo sapiens GN=FOLH1                                      |           |        |
| Q04609-9              | FOLH1_HUMAN Isoform PSMA-9 of Glutamate carboxypeptidase 2 OS=Homo sapiens GN=FOLH1                                      |           |        |
| Q04637                | IF4G1_HUMAN Eukaryotic translation initiation factor 4 gamma 1 OS=Homo sapiens GN=EIF4G1 PE=1 SV=4                       |           | 911.25 |
| Q04637-3              | IF4G1_HUMAN Isoform B of Eukaryotic translation initiation factor 4 gamma 1 OS=Homo sapiens GN=EIF4G1                    |           | 911.25 |
| Q04637-4              | IF4G1_HUMAN Isoform C of Eukaryotic translation initiation factor 4 gamma 1 OS=Homo sapiens GN=EIF4G1                    |           | 911.25 |
| Q04637-5              | IF4G1_HUMAN Isoform D of Eukaryotic translation initiation factor 4 gamma 1 OS=Homo sapiens GN=EIF4G1                    |           | 911.25 |
| Q04637-6              | IF4G1_HUMAN Isoform E of Eukaryotic translation initiation factor 4 gamma 1 OS=Homo sapiens GN=EIF4G1                    |           | 911.25 |
| Q04637;Q04637-3;Q0463 | IF4G1_HUMAN Eukaryotic translation initiation factor 4 gamma 1 OS=Homo sapiens GN=EIF4G1 PE=1 SV=4;>sp Q04637-3 IF4G1_H  | 9.40E-218 |        |
| Q04695                | K1C17_HUMAN Keratin, type I cytoskeletal 17 OS=Homo sapiens GN=KRT17 PE=1 SV=2                                           |           | 539.66 |
| Q04721                | NOTC2_HUMAN Neurogenic locus notch homolog protein 2 OS=Homo sapiens GN=NOTCH2 PE=1 SV=3                                 |           | 29.81  |
| Q04724                | TLE1_HUMAN Transducin-like enhancer protein 1 OS=Homo sapiens GN=TLE1 PE=1 SV=2                                          |           | 50.22  |
| Q04725                | TLE2_HUMAN Transducin-like enhancer protein 2 OS=Homo sapiens GN=TLE2 PE=1 SV=2                                          |           | 50.15  |
| Q04726;Q04726-4;Q0472 | TLE3_HUMAN Transducin-like enhancer protein 3 OS=Homo sapiens GN=TLE3 PE=1 SV=2;>sp Q04726-4 TLE3_HUMAN Isoform 4 of     | 3.40E-07  |        |
| Q04727                | TLE4_HUMAN Transducin-like enhancer protein 4 OS=Homo sapiens GN=TLE4 PE=1 SV=3                                          |           | 37.54  |
| Q04727-2              | TLE4_HUMAN Isoform 2 of Transducin-like enhancer protein 4 OS=Homo sapiens GN=TLE4                                       |           | 37.54  |
| Q04727-3              | TLE4_HUMAN Isoform 3 of Transducin-like enhancer protein 4 OS=Homo sapiens GN=TLE4                                       |           | 37.54  |
| Q04760                | LGUL_HUMAN Lactoylgutathione lyase OS=Homo sapiens GN=GLO1 PE=1 SV=4                                                     |           | 687.24 |
| Q04760-2              | LGUL_HUMAN Isoform 2 of Lactoylgutathione lyase OS=Homo sapiens GN=GLO1                                                  |           | 687.24 |
| Q04760;Q04760-2       | LGUL_HUMAN Lactoylgutathione lyase OS=Homo sapiens GN=GLO1 PE=1 SV=4;>sp Q04760-2 LGUL_HUMAN Isoform 2 of Lactoylglu     | 6.03E-169 |        |
| Q04826                | 1B40_HUMAN HLA class I histocompatibility antigen, B-40 alpha chain OS=Homo sapiens GN=HLA-B PE=1 SV=1                   |           | 659.47 |
| Q04828                | AK1C1_HUMAN Aldo-keto reductase family 1 member C1 OS=Homo sapiens GN=AKR1C1 PE=1 SV=1                                   | 1.46E-207 |        |
| Q04837                | SSBP_HUMAN Single-stranded DNA-binding protein, mitochondrial OS=Homo sapiens GN=SSBP1 PE=1 SV=1                         |           | 664.52 |
| Q04917                | 1433F_HUMAN 14-3-3 protein eta OS=Homo sapiens GN=YWHAH PE=1 SV=4                                                        |           | 680.6  |
| Q04941                | PLP2_HUMAN Proteolipid protein 2 OS=Homo sapiens GN=PLP2 PE=1 SV=1                                                       |           | 156.14 |
| Q04941-2              | PLP2_HUMAN Isoform 2 of Proteolipid protein 2 OS=Homo sapiens GN=PLP2                                                    |           | 78.39  |
| Q04941;Q04941-2       | PLP2_HUMAN Proteolipid protein 2 OS=Homo sapiens GN=PLP2 PE=1 SV=1;>sp Q04941-2 PLP2_HUMAN Isoform 2 of Proteolipid prot | 7.53E-10  |        |
| Q05048                | CSTF1_HUMAN Cleavage stimulation factor subunit 1 OS=Homo sapiens GN=CSTF1 PE=1 SV=1                                     |           |        |
| Q05086;Q05086-3;Q0508 | UBE3A_HUMAN Ubiquitin-protein ligase E3A OS=Homo sapiens GN=UBE3A PE=1 SV=4;>sp Q05086-3 UBE3A_HUMAN Isoform III of I    | 3.16E-06  |        |
| Q05193                | DYN1_HUMAN Dynamin-1 OS=Homo sapiens GN=DNM1 PE=1 SV=2                                                                   |           | 109.34 |
| Q05193-2              | DYN1_HUMAN Isoform 2 of Dynamin-1 OS=Homo sapiens GN=DNM1                                                                |           | 111.04 |
| Q05193-3              | DYN1_HUMAN Isoform 3 of Dynamin-1 OS=Homo sapiens GN=DNM1                                                                |           | 109.34 |
| Q05193-4              | DYN1_HUMAN Isoform 4 of Dynamin-1 OS=Homo sapiens GN=DNM1                                                                |           | 109.34 |
| Q05193-5              | DYN1_HUMAN Isoform 5 of Dynamin-1 OS=Homo sapiens GN=DNM1                                                                |           | 111.04 |
| Q05209                | PTN12_HUMAN Tyrosine-protein phosphatase non-receptor type 12 OS=Homo sapiens GN=PTPN12 PE=1 SV=3                        | 1.34E-148 |        |
| Q05397                | FAK1_HUMAN Focal adhesion kinase 1 OS=Homo sapiens GN=PTK2 PE=1 SV=2                                                     |           | 37     |
| Q05397-2              | FAK1_HUMAN Isoform 2 of Focal adhesion kinase 1 OS=Homo sapiens GN=PTK2                                                  |           | 32.96  |
| Q05397-3              | FAK1_HUMAN Isoform 3 of Focal adhesion kinase 1 OS=Homo sapiens GN=PTK2                                                  |           |        |
| Q05397-4              | FAK1_HUMAN Isoform 4 of Focal adhesion kinase 1 OS=Homo sapiens GN=PTK2                                                  |           | 1.45   |
| Q05397;Q05397-2;Q0539 | FAK1_HUMAN Focal adhesion kinase 1 OS=Homo sapiens GN=PTK2 PE=1 SV=2;>sp Q05397-2 FAK1_HUMAN Isoform 2 of Focal adhe     | 1.07E-46  |        |
| Q05469;Q05469-2       | LIPS_HUMAN Hormone-sensitive lipase OS=Homo sapiens GN=LIPE PE=1 SV=4;>sp Q05469-2 LIPS_HUMAN Isoform 2 of Hormone-s     | 6.15E-13  |        |
| Q05519                | SRS11_HUMAN Serine/arginine-rich splicing factor 11 OS=Homo sapiens GN=SRSF11 PE=1 SV=1                                  |           | 146.5  |
| Q05639                | EF1A2_HUMAN Elongation factor 1-alpha 2 OS=Homo sapiens GN=EEF1A2 PE=1 SV=1                                              |           | 813.55 |
| Q05655                | KPCD_HUMAN Protein kinase C delta type OS=Homo sapiens GN=PRKCD PE=1 SV=2                                                | 2.04E-33  |        |
| Q05682                | CALD1_HUMAN Caldesmon OS=Homo sapiens GN=CALD1 PE=1 SV=3                                                                 |           | 271.12 |

|                            |                                                                                                                                     |            |         |
|----------------------------|-------------------------------------------------------------------------------------------------------------------------------------|------------|---------|
| Q05682-2                   | CALD1_HUMAN Isoform 2 of Caldesmon OS=Homo sapiens GN=CALD1                                                                         |            | 256.1   |
| Q05682-3                   | CALD1_HUMAN Isoform 3 of Caldesmon OS=Homo sapiens GN=CALD1                                                                         |            | 255.89  |
| Q05682-4                   | CALD1_HUMAN Isoform 4 of Caldesmon OS=Homo sapiens GN=CALD1                                                                         |            | 256.1   |
| Q05682-4;Q05682-5;Q05682-5 | CALD1_HUMAN Isoform 4 of Caldesmon OS=Homo sapiens GN=CALD1;>sp Q05682-5 CALD1_HUMAN Isoform 5 of Caldesmon OS=                     | 1.51E-216  |         |
| Q05682-5                   | CALD1_HUMAN Isoform 5 of Caldesmon OS=Homo sapiens GN=CALD1                                                                         |            | 255.89  |
| Q05682-5;Q05682-3;B7Z(5    | CALD1_HUMAN Isoform 5 of Caldesmon OS=Homo sapiens GN=CALD1;>sp Q05682-3 CALD1_HUMAN Isoform 3 of Caldesmon OS=                     | 0          |         |
| Q05707;Q05707-2;Q05707     | COEA1_HUMAN Collagen alpha-1(XIV) chain OS=Homo sapiens GN=COL14A1 PE=1 SV=3;>sp Q05707-2 COEA1_HUMAN Isoform 2 o                   | 0          |         |
| Q05BV3                     | EMAL5_HUMAN Echinoderm microtubule-associated protein-like 5 OS=Homo sapiens GN=EML5 PE=2 SV=3                                      |            |         |
| Q05BV3-2                   | EMAL5_HUMAN Isoform 2 of Echinoderm microtubule-associated protein-like 5 OS=Homo sapiens GN=EML5                                   |            |         |
| Q05BV3-4                   | EMAL5_HUMAN Isoform 4 of Echinoderm microtubule-associated protein-like 5 OS=Homo sapiens GN=EML5                                   |            |         |
| Q05BV3-5                   | EMAL5_HUMAN Isoform 5 of Echinoderm microtubule-associated protein-like 5 OS=Homo sapiens GN=EML5                                   |            |         |
| Q05DH4                     | F16A1_HUMAN Protein FAM160A1 OS=Homo sapiens GN=FAM160A1 PE=2 SV=2                                                                  |            |         |
| Q06124-2;Q06124;Q06124     | PTN11_HUMAN Isoform 2 of Tyrosine-protein phosphatase non-receptor type 11 OS=Homo sapiens GN=PTPN11;>sp Q06124 PTN11               | 0          |         |
| Q06124;Q06124-2;Q06124     | PTN11_HUMAN Tyrosine-protein phosphatase non-receptor type 11 OS=Homo sapiens GN=PTPN11 PE=1 SV=2;>sp Q06124-2 PTN11                | 3.93E-14   |         |
| Q06136                     | KDSR_HUMAN 3-ketodihydrosphingosine reductase OS=Homo sapiens GN=KDSR PE=1 SV=1                                                     | 4.55E-10   |         |
| Q06187                     | BTK_HUMAN Tyrosine-protein kinase BTK OS=Homo sapiens GN=BTK PE=1 SV=3                                                              |            | 47.27   |
| Q06190                     | P2R3A_HUMAN Serine/threonine-protein phosphatase 2A regulatory subunit B'' subunit alpha OS=Homo sapiens GN=PPP2R3A PE=1 SV=1       |            |         |
| Q06190-2                   | P2R3A_HUMAN Isoform PR72 of Serine/threonine-protein phosphatase 2A regulatory subunit B'' subunit alpha OS=Homo sapiens GN=PPP2R3A |            |         |
| Q06203                     | PUR1_HUMAN Amidophosphoribosyltransferase OS=Homo sapiens GN=PPAT PE=1 SV=1                                                         | 2.38E-26   |         |
| Q06210;Q06210-2            | GFPT1_HUMAN Glucosamine--fructose-6-phosphate aminotransferase [isomerizing] 1 OS=Homo sapiens GN=GFPT1 PE=1 SV=3;>sp               | 3.49E-98   |         |
| Q06265                     | EXOS9_HUMAN Exosome complex component RRP45 OS=Homo sapiens GN=EXOSC9 PE=1 SV=3                                                     |            | 110.1   |
| Q06265-2                   | EXOS9_HUMAN Isoform 2 of Exosome complex component RRP45 OS=Homo sapiens GN=EXOSC9                                                  |            | 110.1   |
| Q06265-2;A5PLM5;Q06265     | EXOS9_HUMAN Isoform 2 of Exosome complex exonuclease RRP45 OS=Homo sapiens GN=EXOSC9;>tr A5PLM5 A5PLM5_HUMAN E                      | 4.09E-51   |         |
| Q06265-3                   | EXOS9_HUMAN Isoform 3 of Exosome complex component RRP45 OS=Homo sapiens GN=EXOSC9                                                  |            | 110.1   |
| Q06265-4                   | EXOS9_HUMAN Isoform 4 of Exosome complex component RRP45 OS=Homo sapiens GN=EXOSC9                                                  |            | 110.1   |
| Q06323                     | PSME1_HUMAN Proteasome activator complex subunit 1 OS=Homo sapiens GN=PSME1 PE=1 SV=1                                               |            | 790.34  |
| Q06330;B4DY22;Q06330       | SUH_HUMAN Recombining binding protein suppressor of hairless OS=Homo sapiens GN=RBPJ PE=1 SV=2;>tr B4DY22 B4DY22_HUM/               | 2.10E-12   |         |
| Q06481                     | APLP2_HUMAN Amyloid-like protein 2 OS=Homo sapiens GN=APLP2 PE=1 SV=2                                                               |            | 62.8    |
| Q06481-2                   | APLP2_HUMAN Isoform 2 of Amyloid-like protein 2 OS=Homo sapiens GN=APLP2                                                            |            | 62.8    |
| Q06481-3                   | APLP2_HUMAN Isoform 3 of Amyloid-like protein 2 OS=Homo sapiens GN=APLP2                                                            |            | 62.8    |
| Q06481-4                   | APLP2_HUMAN Isoform 4 of Amyloid-like protein 2 OS=Homo sapiens GN=APLP2                                                            |            | 62.8    |
| Q06481-5                   | APLP2_HUMAN Isoform 5 of Amyloid-like protein 2 OS=Homo sapiens GN=APLP2                                                            |            | 62.8    |
| Q06481;Q06481-3;Q06481     | APLP2_HUMAN Amyloid-like protein 2 OS=Homo sapiens GN=APLP2 PE=1 SV=2;>sp Q06481-3 APLP2_HUMAN Isoform 3 of Amyloid-                | 4.27E-11   |         |
| Q06587                     | RING1_HUMAN E3 ubiquitin-protein ligase RING1 OS=Homo sapiens GN=RING1 PE=1 SV=2                                                    |            | 29.96   |
| Q06587-2                   | RING1_HUMAN Isoform 2 of E3 ubiquitin-protein ligase RING1 OS=Homo sapiens GN=RING1                                                 |            | 29.96   |
| Q06587;Q06587-2            | RING1_HUMAN E3 ubiquitin-protein ligase RING1 OS=Homo sapiens GN=RING1 PE=1 SV=2;>sp Q06587-2 RING1_HUMAN Isoform 2                 | 1.36E-11   |         |
| Q06732                     | ZNF33B_HUMAN Zinc finger protein 33B OS=Homo sapiens GN=ZNF33B PE=2 SV=2                                                            | 0.00019949 |         |
| Q06787                     | FMR1_HUMAN Fragile X mental retardation 1 protein OS=Homo sapiens GN=FMR1 PE=1 SV=1                                                 |            | 91.47   |
| Q06787-2                   | FMR1_HUMAN Isoform 1 of Fragile X mental retardation 1 protein OS=Homo sapiens GN=FMR1                                              |            | 94.63   |
| Q06787-3                   | FMR1_HUMAN Isoform 2 of Fragile X mental retardation 1 protein OS=Homo sapiens GN=FMR1                                              |            | 91.47   |
| Q06787-4                   | FMR1_HUMAN Isoform 3 of Fragile X mental retardation 1 protein OS=Homo sapiens GN=FMR1                                              |            | 94.63   |
| Q06787-5                   | FMR1_HUMAN Isoform 4 of Fragile X mental retardation 1 protein OS=Homo sapiens GN=FMR1                                              |            | 91.47   |
| Q06787-6                   | FMR1_HUMAN Isoform 5 of Fragile X mental retardation 1 protein OS=Homo sapiens GN=FMR1                                              |            | 94.63   |
| Q06787-7                   | FMR1_HUMAN Isoform 7 of Fragile X mental retardation 1 protein OS=Homo sapiens GN=FMR1                                              |            | 94.63   |
| Q06787-8                   | FMR1_HUMAN Isoform 8 of Fragile X mental retardation 1 protein OS=Homo sapiens GN=FMR1                                              |            | 91.47   |
| Q06787;Q06787-3;Q06787     | FMR1_HUMAN Fragile X mental retardation 1 protein OS=Homo sapiens GN=FMR1 PE=1 SV=1;>sp Q06787-3 FMR1_HUMAN Isoform                 | 7.40E-13   |         |
| Q06828                     | FMOD_HUMAN Fibromodulin OS=Homo sapiens GN=FMOD PE=1 SV=2                                                                           | 1.57E-64   |         |
| Q06830                     | PRDX1_HUMAN Peroxiredoxin-1 OS=Homo sapiens GN=PRDX1 PE=1 SV=1                                                                      |            | 921.03  |
| Q07000                     | 1C15_HUMAN HLA class I histocompatibility antigen, Cw-15 alpha chain OS=Homo sapiens GN=HLA-C PE=1 SV=1                             |            | 458.03  |
| Q07002                     | CDK18_HUMAN Cyclin-dependent kinase 18 OS=Homo sapiens GN=CDK18 PE=1 SV=3                                                           |            | 97.41   |
| Q07002-2                   | CDK18_HUMAN Isoform 2 of Cyclin-dependent kinase 18 OS=Homo sapiens GN=CDK18                                                        |            | 97.41   |
| Q07002-3                   | CDK18_HUMAN Isoform 3 of Cyclin-dependent kinase 18 OS=Homo sapiens GN=CDK18                                                        |            | 97.41   |
| Q07002-3;Q07002-2;Q07002   | CDK18_HUMAN Isoform 3 of Cyclin-dependent kinase 18 OS=Homo sapiens GN=CDK18;>sp Q07002-2 CDK18_HUMAN Isoform 2 o                   | 1.37E-07   |         |
| Q07020                     | RL18_HUMAN 60S ribosomal protein L18 OS=Homo sapiens GN=RPL18 PE=1 SV=2                                                             |            | 556.48  |
| Q07021                     | C1QBP_HUMAN Complement component 1 Q subcomponent-binding protein, mitochondrial OS=Homo sapiens GN=C1QBP PE=1 SV=1                 |            | 500.12  |
| Q07065                     | CKAP4_HUMAN Cytoskeleton-associated protein 4 OS=Homo sapiens GN=CKAP4 PE=1 SV=2                                                    |            | 1832.11 |
| Q07157                     | ZO1_HUMAN Tight junction protein ZO-1 OS=Homo sapiens GN=TJP1 PE=1 SV=3                                                             |            | 101.38  |
| Q07157-2                   | ZO1_HUMAN Isoform Short of Tight junction protein ZO-1 OS=Homo sapiens GN=TJP1                                                      |            | 101.38  |
| Q07157;Q07157-2            | ZO1_HUMAN Tight junction protein ZO-1 OS=Homo sapiens GN=TJP1 PE=1 SV=3;>sp Q07157-2 ZO1_HUMAN Isoform Short of Tight               | 1.12E-59   |         |
| Q07283                     | TRHY_HUMAN Trichohyalin OS=Homo sapiens GN=TCHH PE=1 SV=2                                                                           |            |         |
| Q07507                     | DERM_HUMAN Dermatopontin OS=Homo sapiens GN=DPT PE=2 SV=2                                                                           | 5.71E-112  |         |

|                                                                                                                                                                                                                                                                                                                                                                                                                                                                                                                                                                                                                                                                                                                                                                                                                                                                                                                                                                                             |                                                                                                                                                                                                                                                                 |           |         |
|---------------------------------------------------------------------------------------------------------------------------------------------------------------------------------------------------------------------------------------------------------------------------------------------------------------------------------------------------------------------------------------------------------------------------------------------------------------------------------------------------------------------------------------------------------------------------------------------------------------------------------------------------------------------------------------------------------------------------------------------------------------------------------------------------------------------------------------------------------------------------------------------------------------------------------------------------------------------------------------------|-----------------------------------------------------------------------------------------------------------------------------------------------------------------------------------------------------------------------------------------------------------------|-----------|---------|
| Q07666                                                                                                                                                                                                                                                                                                                                                                                                                                                                                                                                                                                                                                                                                                                                                                                                                                                                                                                                                                                      | KHDR1_HUMAN KH domain-containing, RNA-binding, signal transduction-associated protein 1 OS=Homo sapiens GN=KHDRBS1 PE=1 SV=1                                                                                                                                    |           | 539.52  |
| Q07666-2                                                                                                                                                                                                                                                                                                                                                                                                                                                                                                                                                                                                                                                                                                                                                                                                                                                                                                                                                                                    | KHDR1_HUMAN Isoform 2 of KH domain-containing, RNA-binding, signal transduction-associated protein 1 OS=Homo sapiens GN=KHDRBS1                                                                                                                                 |           | 539.52  |
| Q07666-3                                                                                                                                                                                                                                                                                                                                                                                                                                                                                                                                                                                                                                                                                                                                                                                                                                                                                                                                                                                    | KHDR1_HUMAN Isoform 3 of KH domain-containing, RNA-binding, signal transduction-associated protein 1 OS=Homo sapiens GN=KHDRBS1                                                                                                                                 |           | 477.27  |
| Q07666;Q07666-2;Q07666-3                                                                                                                                                                                                                                                                                                                                                                                                                                                                                                                                                                                                                                                                                                                                                                                                                                                                                                                                                                    | KHDR1_HUMAN KH domain-containing, RNA-binding, signal transduction-associated protein 1 OS=Homo sapiens GN=KHDRBS1 PE=1 SV=1                                                                                                                                    | 3.16E-222 |         |
| Q07812                                                                                                                                                                                                                                                                                                                                                                                                                                                                                                                                                                                                                                                                                                                                                                                                                                                                                                                                                                                      | BAX_HUMAN Apoptosis regulator BAX OS=Homo sapiens GN=BAX PE=1 SV=1                                                                                                                                                                                              |           | 384.58  |
| Q07812-2                                                                                                                                                                                                                                                                                                                                                                                                                                                                                                                                                                                                                                                                                                                                                                                                                                                                                                                                                                                    | BAX_HUMAN Isoform Beta of Apoptosis regulator BAX OS=Homo sapiens GN=BAX                                                                                                                                                                                        |           | 384.58  |
| Q07812-2;Q07812;Q07812-3                                                                                                                                                                                                                                                                                                                                                                                                                                                                                                                                                                                                                                                                                                                                                                                                                                                                                                                                                                    | BAX_HUMAN Isoform Beta of Apoptosis regulator BAX OS=Homo sapiens GN=BAX;>sp Q07812 BAX_HUMAN Apoptosis regulator BAX OS=Homo sapiens GN=BAX PE=1 SV=1                                                                                                          | 5.07E-169 |         |
| Q07812-4                                                                                                                                                                                                                                                                                                                                                                                                                                                                                                                                                                                                                                                                                                                                                                                                                                                                                                                                                                                    | BAX_HUMAN Isoform Delta of Apoptosis regulator BAX OS=Homo sapiens GN=BAX                                                                                                                                                                                       |           | 110.84  |
| Q07812-5                                                                                                                                                                                                                                                                                                                                                                                                                                                                                                                                                                                                                                                                                                                                                                                                                                                                                                                                                                                    | BAX_HUMAN Isoform Epsilon of Apoptosis regulator BAX OS=Homo sapiens GN=BAX                                                                                                                                                                                     |           | 336.02  |
| Q07812-6                                                                                                                                                                                                                                                                                                                                                                                                                                                                                                                                                                                                                                                                                                                                                                                                                                                                                                                                                                                    | BAX_HUMAN Isoform Zeta of Apoptosis regulator BAX OS=Homo sapiens GN=BAX                                                                                                                                                                                        |           | 210.59  |
| Q07812-7                                                                                                                                                                                                                                                                                                                                                                                                                                                                                                                                                                                                                                                                                                                                                                                                                                                                                                                                                                                    | BAX_HUMAN Isoform Psi of Apoptosis regulator BAX OS=Homo sapiens GN=BAX                                                                                                                                                                                         |           | 342.42  |
| Q07812-8                                                                                                                                                                                                                                                                                                                                                                                                                                                                                                                                                                                                                                                                                                                                                                                                                                                                                                                                                                                    | BAX_HUMAN Isoform Sigma of Apoptosis regulator BAX OS=Homo sapiens GN=BAX                                                                                                                                                                                       |           | 384.58  |
| Q07817                                                                                                                                                                                                                                                                                                                                                                                                                                                                                                                                                                                                                                                                                                                                                                                                                                                                                                                                                                                      | B2CL1_HUMAN Bcl-2-like protein 1 OS=Homo sapiens GN=BCL2L1 PE=1 SV=1                                                                                                                                                                                            |           |         |
| Q07817-2                                                                                                                                                                                                                                                                                                                                                                                                                                                                                                                                                                                                                                                                                                                                                                                                                                                                                                                                                                                    | B2CL1_HUMAN Isoform Bcl-X(S) of Bcl-2-like protein 1 OS=Homo sapiens GN=BCL2L1                                                                                                                                                                                  |           |         |
| Q07817-3                                                                                                                                                                                                                                                                                                                                                                                                                                                                                                                                                                                                                                                                                                                                                                                                                                                                                                                                                                                    | B2CL1_HUMAN Isoform Bcl-X(beta) of Bcl-2-like protein 1 OS=Homo sapiens GN=BCL2L1                                                                                                                                                                               |           |         |
| Q07864                                                                                                                                                                                                                                                                                                                                                                                                                                                                                                                                                                                                                                                                                                                                                                                                                                                                                                                                                                                      | DPOE1_HUMAN DNA polymerase epsilon catalytic subunit A OS=Homo sapiens GN=POLE PE=1 SV=5                                                                                                                                                                        |           | 35.24   |
| Q07866-4;Q07866-6;Q07866-7;Q07866-8;Q07866-9;Q07866-10;Q07866-11;Q07866-12;Q07866-13;Q07866-14;Q07866-15;Q07866-16;Q07866-17;Q07866-18;Q07866-19;Q07866-20;Q07866-21;Q07866-22;Q07866-23;Q07866-24;Q07866-25;Q07866-26;Q07866-27;Q07866-28;Q07866-29;Q07866-30;Q07866-31;Q07866-32;Q07866-33;Q07866-34;Q07866-35;Q07866-36;Q07866-37;Q07866-38;Q07866-39;Q07866-40;Q07866-41;Q07866-42;Q07866-43;Q07866-44;Q07866-45;Q07866-46;Q07866-47;Q07866-48;Q07866-49;Q07866-50;Q07866-51;Q07866-52;Q07866-53;Q07866-54;Q07866-55;Q07866-56;Q07866-57;Q07866-58;Q07866-59;Q07866-60;Q07866-61;Q07866-62;Q07866-63;Q07866-64;Q07866-65;Q07866-66;Q07866-67;Q07866-68;Q07866-69;Q07866-70;Q07866-71;Q07866-72;Q07866-73;Q07866-74;Q07866-75;Q07866-76;Q07866-77;Q07866-78;Q07866-79;Q07866-80;Q07866-81;Q07866-82;Q07866-83;Q07866-84;Q07866-85;Q07866-86;Q07866-87;Q07866-88;Q07866-89;Q07866-90;Q07866-91;Q07866-92;Q07866-93;Q07866-94;Q07866-95;Q07866-96;Q07866-97;Q07866-98;Q07866-99;Q07866-100 | 1.42E-156                                                                                                                                                                                                                                                       |           |         |
| Q07866-9;Q07866-4;Q07866-10;Q07866-11;Q07866-12;Q07866-13;Q07866-14;Q07866-15;Q07866-16;Q07866-17;Q07866-18;Q07866-19;Q07866-20;Q07866-21;Q07866-22;Q07866-23;Q07866-24;Q07866-25;Q07866-26;Q07866-27;Q07866-28;Q07866-29;Q07866-30;Q07866-31;Q07866-32;Q07866-33;Q07866-34;Q07866-35;Q07866-36;Q07866-37;Q07866-38;Q07866-39;Q07866-40;Q07866-41;Q07866-42;Q07866-43;Q07866-44;Q07866-45;Q07866-46;Q07866-47;Q07866-48;Q07866-49;Q07866-50;Q07866-51;Q07866-52;Q07866-53;Q07866-54;Q07866-55;Q07866-56;Q07866-57;Q07866-58;Q07866-59;Q07866-60;Q07866-61;Q07866-62;Q07866-63;Q07866-64;Q07866-65;Q07866-66;Q07866-67;Q07866-68;Q07866-69;Q07866-70;Q07866-71;Q07866-72;Q07866-73;Q07866-74;Q07866-75;Q07866-76;Q07866-77;Q07866-78;Q07866-79;Q07866-80;Q07866-81;Q07866-82;Q07866-83;Q07866-84;Q07866-85;Q07866-86;Q07866-87;Q07866-88;Q07866-89;Q07866-90;Q07866-91;Q07866-92;Q07866-93;Q07866-94;Q07866-95;Q07866-96;Q07866-97;Q07866-98;Q07866-99;Q07866-100                            | 2.17E-45                                                                                                                                                                                                                                                        |           |         |
| Q07889                                                                                                                                                                                                                                                                                                                                                                                                                                                                                                                                                                                                                                                                                                                                                                                                                                                                                                                                                                                      | SOS1_HUMAN Son of sevenless homolog 1 OS=Homo sapiens GN=SOS1 PE=1 SV=1                                                                                                                                                                                         |           | 30.67   |
| Q07912                                                                                                                                                                                                                                                                                                                                                                                                                                                                                                                                                                                                                                                                                                                                                                                                                                                                                                                                                                                      | ACK1_HUMAN Activated CDC42 kinase 1 OS=Homo sapiens GN=TNK2 PE=1 SV=3                                                                                                                                                                                           |           | 21.14   |
| Q07912-2                                                                                                                                                                                                                                                                                                                                                                                                                                                                                                                                                                                                                                                                                                                                                                                                                                                                                                                                                                                    | ACK1_HUMAN Isoform 2 of Activated CDC42 kinase 1 OS=Homo sapiens GN=TNK2                                                                                                                                                                                        |           | 21.14   |
| Q07912-3                                                                                                                                                                                                                                                                                                                                                                                                                                                                                                                                                                                                                                                                                                                                                                                                                                                                                                                                                                                    | ACK1_HUMAN Isoform 3 of Activated CDC42 kinase 1 OS=Homo sapiens GN=TNK2                                                                                                                                                                                        |           | 21.14   |
| Q07954                                                                                                                                                                                                                                                                                                                                                                                                                                                                                                                                                                                                                                                                                                                                                                                                                                                                                                                                                                                      | LRP1_HUMAN Prolow-density lipoprotein receptor-related protein 1 OS=Homo sapiens GN=LRP1 PE=1 SV=2                                                                                                                                                              |           | 61.66   |
| Q07955                                                                                                                                                                                                                                                                                                                                                                                                                                                                                                                                                                                                                                                                                                                                                                                                                                                                                                                                                                                      | SRSF1_HUMAN Serine/arginine-rich splicing factor 1 OS=Homo sapiens GN=SRSF1 PE=1 SV=2                                                                                                                                                                           |           | 543.95  |
| Q07955-2                                                                                                                                                                                                                                                                                                                                                                                                                                                                                                                                                                                                                                                                                                                                                                                                                                                                                                                                                                                    | SRSF1_HUMAN Isoform ASF-2 of Serine/arginine-rich splicing factor 1 OS=Homo sapiens GN=SRSF1                                                                                                                                                                    |           | 529.49  |
| Q07955-3                                                                                                                                                                                                                                                                                                                                                                                                                                                                                                                                                                                                                                                                                                                                                                                                                                                                                                                                                                                    | SRSF1_HUMAN Isoform ASF-3 of Serine/arginine-rich splicing factor 1 OS=Homo sapiens GN=SRSF1                                                                                                                                                                    |           | 529.49  |
| Q07955;Q07955-2;Q07955-3                                                                                                                                                                                                                                                                                                                                                                                                                                                                                                                                                                                                                                                                                                                                                                                                                                                                                                                                                                    | SRSF1_HUMAN Serine/arginine-rich splicing factor 1 OS=Homo sapiens GN=SRSF1 PE=1 SV=2;>sp Q07955-2 SRSF1_HUMAN Isoform ASF-2 of Serine/arginine-rich splicing factor 1 OS=Homo sapiens GN=SRSF1                                                                 | 5.04E-58  |         |
| Q07960                                                                                                                                                                                                                                                                                                                                                                                                                                                                                                                                                                                                                                                                                                                                                                                                                                                                                                                                                                                      | RHG1_HUMAN Rho GTPase-activating protein 1 OS=Homo sapiens GN=ARHGAP1 PE=1 SV=1                                                                                                                                                                                 | 1.26E-37  |         |
| Q08043                                                                                                                                                                                                                                                                                                                                                                                                                                                                                                                                                                                                                                                                                                                                                                                                                                                                                                                                                                                      | ACTN3_HUMAN Alpha-actinin-3 OS=Homo sapiens GN=ACTN3 PE=1 SV=2                                                                                                                                                                                                  |           | 562.01  |
| Q08117                                                                                                                                                                                                                                                                                                                                                                                                                                                                                                                                                                                                                                                                                                                                                                                                                                                                                                                                                                                      | AES_HUMAN Amino-terminal enhancer of split OS=Homo sapiens GN=AES PE=1 SV=4                                                                                                                                                                                     |           | 20.05   |
| Q08170                                                                                                                                                                                                                                                                                                                                                                                                                                                                                                                                                                                                                                                                                                                                                                                                                                                                                                                                                                                      | SRSF4_HUMAN Serine/arginine-rich splicing factor 4 OS=Homo sapiens GN=SRSF4 PE=1 SV=2                                                                                                                                                                           |           | 67.71   |
| Q08209                                                                                                                                                                                                                                                                                                                                                                                                                                                                                                                                                                                                                                                                                                                                                                                                                                                                                                                                                                                      | PPP3CA_HUMAN Serine/threonine-protein phosphatase 2B catalytic subunit alpha isoform OS=Homo sapiens GN=PPP3CA PE=1 SV=1                                                                                                                                        |           | 128.96  |
| Q08209-2                                                                                                                                                                                                                                                                                                                                                                                                                                                                                                                                                                                                                                                                                                                                                                                                                                                                                                                                                                                    | PPP3CA_HUMAN Isoform 2 of Serine/threonine-protein phosphatase 2B catalytic subunit alpha isoform OS=Homo sapiens GN=PPP3CA                                                                                                                                     |           | 128.96  |
| Q08209;Q08209-2;P16291                                                                                                                                                                                                                                                                                                                                                                                                                                                                                                                                                                                                                                                                                                                                                                                                                                                                                                                                                                      | PPP3CA_HUMAN Serine/threonine-protein phosphatase 2B catalytic subunit alpha isoform OS=Homo sapiens GN=PPP3CA PE=1 SV=1;>sp P16291 PPP3CA_HUMAN Isoform 2 of Serine/threonine-protein phosphatase 2B catalytic subunit alpha isoform OS=Homo sapiens GN=PPP3CA | 2.25E-18  |         |
| Q08211                                                                                                                                                                                                                                                                                                                                                                                                                                                                                                                                                                                                                                                                                                                                                                                                                                                                                                                                                                                      | DHX9_HUMAN ATP-dependent RNA helicase A OS=Homo sapiens GN=DHX9 PE=1 SV=4                                                                                                                                                                                       |           | 1586.43 |
| Q08257                                                                                                                                                                                                                                                                                                                                                                                                                                                                                                                                                                                                                                                                                                                                                                                                                                                                                                                                                                                      | QOR_HUMAN Quinone oxidoreductase OS=Homo sapiens GN=CRYZ PE=1 SV=1                                                                                                                                                                                              | 4.09E-11  |         |
| Q08345                                                                                                                                                                                                                                                                                                                                                                                                                                                                                                                                                                                                                                                                                                                                                                                                                                                                                                                                                                                      | DDR1_HUMAN Epithelial discoidin domain-containing receptor 1 OS=Homo sapiens GN=DDR1 PE=1 SV=1                                                                                                                                                                  |           |         |
| Q08345-2                                                                                                                                                                                                                                                                                                                                                                                                                                                                                                                                                                                                                                                                                                                                                                                                                                                                                                                                                                                    | DDR1_HUMAN Isoform 2 of Epithelial discoidin domain-containing receptor 1 OS=Homo sapiens GN=DDR1                                                                                                                                                               |           |         |
| Q08345-5                                                                                                                                                                                                                                                                                                                                                                                                                                                                                                                                                                                                                                                                                                                                                                                                                                                                                                                                                                                    | DDR1_HUMAN Isoform 4 of Epithelial discoidin domain-containing receptor 1 OS=Homo sapiens GN=DDR1                                                                                                                                                               |           |         |
| Q08357                                                                                                                                                                                                                                                                                                                                                                                                                                                                                                                                                                                                                                                                                                                                                                                                                                                                                                                                                                                      | S20A2_HUMAN Sodium-dependent phosphate transporter 2 OS=Homo sapiens GN=SLC20A2 PE=1 SV=1                                                                                                                                                                       |           | 39.28   |
| Q08378                                                                                                                                                                                                                                                                                                                                                                                                                                                                                                                                                                                                                                                                                                                                                                                                                                                                                                                                                                                      | GOGA3_HUMAN Golgin subfamily A member 3 OS=Homo sapiens GN=GOLGA3 PE=1 SV=2                                                                                                                                                                                     |           | 26.72   |
| Q08378-2                                                                                                                                                                                                                                                                                                                                                                                                                                                                                                                                                                                                                                                                                                                                                                                                                                                                                                                                                                                    | GOGA3_HUMAN Isoform 2 of Golgin subfamily A member 3 OS=Homo sapiens GN=GOLGA3                                                                                                                                                                                  |           | 26.72   |
| Q08378-4                                                                                                                                                                                                                                                                                                                                                                                                                                                                                                                                                                                                                                                                                                                                                                                                                                                                                                                                                                                    | GOGA3_HUMAN Isoform 3 of Golgin subfamily A member 3 OS=Homo sapiens GN=GOLGA3                                                                                                                                                                                  |           | 23.88   |
| Q08378;Q08378-2;Q08378-4                                                                                                                                                                                                                                                                                                                                                                                                                                                                                                                                                                                                                                                                                                                                                                                                                                                                                                                                                                    | GOGA3_HUMAN Golgin subfamily A member 3 OS=Homo sapiens GN=GOLGA3 PE=1 SV=2;>sp Q08378-2 GOGA3_HUMAN Isoform 2 of Golgin subfamily A member 3 OS=Homo sapiens GN=GOLGA3                                                                                         | 5.08E-08  |         |
| Q08379                                                                                                                                                                                                                                                                                                                                                                                                                                                                                                                                                                                                                                                                                                                                                                                                                                                                                                                                                                                      | GOGA2_HUMAN Golgin subfamily A member 2 OS=Homo sapiens GN=GOLGA2 PE=1 SV=3                                                                                                                                                                                     |           |         |
| Q08379-2                                                                                                                                                                                                                                                                                                                                                                                                                                                                                                                                                                                                                                                                                                                                                                                                                                                                                                                                                                                    | GOGA2_HUMAN Isoform 2 of Golgin subfamily A member 2 OS=Homo sapiens GN=GOLGA2                                                                                                                                                                                  |           |         |
| Q08379;B7ZC06                                                                                                                                                                                                                                                                                                                                                                                                                                                                                                                                                                                                                                                                                                                                                                                                                                                                                                                                                                               | GOGA2_HUMAN Golgin subfamily A member 2 OS=Homo sapiens GN=GOLGA2 PE=1 SV=3;>tr B7ZC06 B7ZC06_HUMAN Golgi autoantigen 2 OS=Homo sapiens GN=GOLGA2                                                                                                               | 7.64E-19  |         |
| Q08380                                                                                                                                                                                                                                                                                                                                                                                                                                                                                                                                                                                                                                                                                                                                                                                                                                                                                                                                                                                      | LG3BP_HUMAN Galectin-3-binding protein OS=Homo sapiens GN=LGALS3BP PE=1 SV=1                                                                                                                                                                                    |           | 94.59   |
| Q08431;B3KTQ2;Q08431-1                                                                                                                                                                                                                                                                                                                                                                                                                                                                                                                                                                                                                                                                                                                                                                                                                                                                                                                                                                      | MFGM_HUMAN Lactadherin OS=Homo sapiens GN=MFG8 PE=1 SV=2;>tr B3KTQ2 B3KTQ2_HUMAN cDNA FLJ38589 fis, clone HCHO1                                                                                                                                                 | 1.33E-18  |         |
| Q08462                                                                                                                                                                                                                                                                                                                                                                                                                                                                                                                                                                                                                                                                                                                                                                                                                                                                                                                                                                                      | ADCY2_HUMAN Adenylate cyclase type 2 OS=Homo sapiens GN=ADCY2 PE=1 SV=5                                                                                                                                                                                         |           | 36.25   |
| Q08499                                                                                                                                                                                                                                                                                                                                                                                                                                                                                                                                                                                                                                                                                                                                                                                                                                                                                                                                                                                      | PDE4D_HUMAN cAMP-specific 3',5'-cyclic phosphodiesterase 4D OS=Homo sapiens GN=PDE4D PE=1 SV=2                                                                                                                                                                  |           | 16.05   |
| Q08499-10                                                                                                                                                                                                                                                                                                                                                                                                                                                                                                                                                                                                                                                                                                                                                                                                                                                                                                                                                                                   | PDE4D_HUMAN Isoform 9 of cAMP-specific 3',5'-cyclic phosphodiesterase 4D OS=Homo sapiens GN=PDE4D                                                                                                                                                               |           | 14.71   |
| Q08499-11                                                                                                                                                                                                                                                                                                                                                                                                                                                                                                                                                                                                                                                                                                                                                                                                                                                                                                                                                                                   | PDE4D_HUMAN Isoform 7 of cAMP-specific 3',5'-cyclic phosphodiesterase 4D OS=Homo sapiens GN=PDE4D                                                                                                                                                               |           | 13.38   |
| Q08499-12                                                                                                                                                                                                                                                                                                                                                                                                                                                                                                                                                                                                                                                                                                                                                                                                                                                                                                                                                                                   | PDE4D_HUMAN Isoform 12 of cAMP-specific 3',5'-cyclic phosphodiesterase 4D OS=Homo sapiens GN=PDE4D                                                                                                                                                              |           | 49.73   |
| Q08499-2                                                                                                                                                                                                                                                                                                                                                                                                                                                                                                                                                                                                                                                                                                                                                                                                                                                                                                                                                                                    | PDE4D_HUMAN Isoform 3 of cAMP-specific 3',5'-cyclic phosphodiesterase 4D OS=Homo sapiens GN=PDE4D                                                                                                                                                               |           | 16.05   |
| Q08499-3                                                                                                                                                                                                                                                                                                                                                                                                                                                                                                                                                                                                                                                                                                                                                                                                                                                                                                                                                                                    | PDE4D_HUMAN Isoform 10 of cAMP-specific 3',5'-cyclic phosphodiesterase 4D OS=Homo sapiens GN=PDE4D                                                                                                                                                              |           | 16.05   |
| Q08499-4                                                                                                                                                                                                                                                                                                                                                                                                                                                                                                                                                                                                                                                                                                                                                                                                                                                                                                                                                                                    | PDE4D_HUMAN Isoform 1 of cAMP-specific 3',5'-cyclic phosphodiesterase 4D OS=Homo sapiens GN=PDE4D                                                                                                                                                               |           | 7.45    |
| Q08499-5                                                                                                                                                                                                                                                                                                                                                                                                                                                                                                                                                                                                                                                                                                                                                                                                                                                                                                                                                                                    | PDE4D_HUMAN Isoform 2 of cAMP-specific 3',5'-cyclic phosphodiesterase 4D OS=Homo sapiens GN=PDE4D                                                                                                                                                               |           | 16.05   |
| Q08499-6                                                                                                                                                                                                                                                                                                                                                                                                                                                                                                                                                                                                                                                                                                                                                                                                                                                                                                                                                                                    | PDE4D_HUMAN Isoform 5 of cAMP-specific 3',5'-cyclic phosphodiesterase 4D OS=Homo sapiens GN=PDE4D                                                                                                                                                               |           | 65.78   |
| Q08499-7                                                                                                                                                                                                                                                                                                                                                                                                                                                                                                                                                                                                                                                                                                                                                                                                                                                                                                                                                                                    | PDE4D_HUMAN Isoform N3 of cAMP-specific 3',5'-cyclic phosphodiesterase 4D OS=Homo sapiens GN=PDE4D                                                                                                                                                              |           | 49.73   |
| Q08499-8                                                                                                                                                                                                                                                                                                                                                                                                                                                                                                                                                                                                                                                                                                                                                                                                                                                                                                                                                                                    | PDE4D_HUMAN Isoform 6 of cAMP-specific 3',5'-cyclic phosphodiesterase 4D OS=Homo sapiens GN=PDE4D                                                                                                                                                               |           | 16.05   |



|                       |                                                                                                                        |           |          |
|-----------------------|------------------------------------------------------------------------------------------------------------------------|-----------|----------|
| Q08499-9              | PDE4D_HUMAN Isoform 8 of cAMP-specific 3',5'-cyclic phosphodiesterase 4D OS=Homo sapiens GN=PDE4D                      |           | 16.05    |
| Q08554                | DSC1_HUMAN Desmocollin-1 OS=Homo sapiens GN=DSC1 PE=1 SV=2                                                             |           | 30.92    |
| Q08554-2              | DSC1_HUMAN Isoform 1B of Desmocollin-1 OS=Homo sapiens GN=DSC1                                                         |           | 30.92    |
| Q08623                | HDHD1_HUMAN Pseudouridine-5-monophosphatase OS=Homo sapiens GN=HDHD1 PE=1 SV=3                                         | 3.94E-11  |          |
| Q08623;B7Z6Q3         | HDHD1_HUMAN Haloacid dehalogenase-like hydrolase domain-containing protein 1 OS=Homo sapiens GN=HDHD1 PE=1 SV=3;>tr B7 | 9.03E-11  |          |
| Q08708                | CLM6_HUMAN CMRF35-like molecule 6 OS=Homo sapiens GN=CD300C PE=2 SV=1                                                  |           | 37.31    |
| Q08722                | CD47_HUMAN Leukocyte surface antigen CD47 OS=Homo sapiens GN=CD47 PE=1 SV=1                                            |           | 84.38    |
| Q08722-2              | CD47_HUMAN Isoform OA3-293 of Leukocyte surface antigen CD47 OS=Homo sapiens GN=CD47                                   |           | 84.38    |
| Q08722-3              | CD47_HUMAN Isoform OA3-305 of Leukocyte surface antigen CD47 OS=Homo sapiens GN=CD47                                   |           | 84.38    |
| Q08722-4              | CD47_HUMAN Isoform OA3-312 of Leukocyte surface antigen CD47 OS=Homo sapiens GN=CD47                                   |           | 84.38    |
| Q08722;Q08722-4;Q0872 | CD47_HUMAN Leukocyte surface antigen CD47 OS=Homo sapiens GN=CD47 PE=1 SV=1;>sp Q08722-4 CD47_HUMAN Isoform OA3-       | 8.18E-11  |          |
| Q08752                | PPID_HUMAN Peptidyl-prolyl cis-trans isomerase D OS=Homo sapiens GN=PPID PE=1 SV=3                                     | 2.62E-22  |          |
| Q08945                | SSRP1_HUMAN FACT complex subunit SSRP1 OS=Homo sapiens GN=SSRP1 PE=1 SV=1                                              |           | 507.72   |
| Q08999                | RBL2_HUMAN Retinoblastoma-like protein 2 OS=Homo sapiens GN=RBL2 PE=1 SV=3                                             |           |          |
| Q08AF3                | SLFN5_HUMAN Schlafen family member 5 OS=Homo sapiens GN=SLFN5 PE=1 SV=1                                                |           |          |
| Q08AF3-2              | SLFN5_HUMAN Isoform 2 of Schlafen family member 5 OS=Homo sapiens GN=SLFN5                                             |           |          |
| Q08AF3;Q08AF3-2       | SLFN5_HUMAN Schlafen family member 5 OS=Homo sapiens GN=SLFN5 PE=1 SV=1;>sp Q08AF3-2 SLFN5_HUMAN Isoform 2 of Schl     | 1.52E-29  |          |
| Q08AH1                | ACSM1_HUMAN Acyl-coenzyme A synthetase ACSM1, mitochondrial OS=Homo sapiens GN=ACSM1 PE=2 SV=1                         |           |          |
| Q08AH1-2              | ACSM1_HUMAN Isoform 2 of Acyl-coenzyme A synthetase ACSM1, mitochondrial OS=Homo sapiens GN=ACSM1                      |           |          |
| Q08AM6                | VAC14_HUMAN Protein VAC14 homolog OS=Homo sapiens GN=VAC14 PE=1 SV=1                                                   | 9.79E-22  |          |
| Q08J23                | NSUN2_HUMAN tRNA (cytosine(34)-C(5))-methyltransferase OS=Homo sapiens GN=NSUN2 PE=1 SV=2                              |           | 380.53   |
| Q08J23;B4DQW2;A8K529  | NSUN2_HUMAN tRNA (cytosine-5-)-methyltransferase NSUN2 OS=Homo sapiens GN=NSUN2 PE=1 SV=2;>tr B4DQW2 B4DQW2_HUM        | 8.21E-84  |          |
| Q09019                | DMWD_HUMAN Dystrophia myotonica WD repeat-containing protein OS=Homo sapiens GN=DMWD PE=1 SV=3                         |           |          |
| Q09028                | RBBP4_HUMAN Histone-binding protein RBBP4 OS=Homo sapiens GN=RBBP4 PE=1 SV=3                                           |           | 102.89   |
| Q09028-2              | RBBP4_HUMAN Isoform 2 of Histone-binding protein RBBP4 OS=Homo sapiens GN=RBBP4                                        |           | 102.89   |
| Q09028-3              | RBBP4_HUMAN Isoform 3 of Histone-binding protein RBBP4 OS=Homo sapiens GN=RBBP4                                        |           | 102.89   |
| Q09028-4              | RBBP4_HUMAN Isoform 4 of Histone-binding protein RBBP4 OS=Homo sapiens GN=RBBP4                                        |           | 102.89   |
| Q09028;Q09028-2;Q0902 | RBBP4_HUMAN Histone-binding protein RBBP4 OS=Homo sapiens GN=RBBP4 PE=1 SV=3;>sp Q09028-2 RBBP4_HUMAN Isoform 2 of     | 5.68E-103 |          |
| Q09160                | 1A80_HUMAN HLA class I histocompatibility antigen, A-80 alpha chain OS=Homo sapiens GN=HLA-A PE=2 SV=1                 |           | 246.13   |
| Q09161                | NCBP1_HUMAN Nuclear cap-binding protein subunit 1 OS=Homo sapiens GN=NCBP1 PE=1 SV=1                                   |           | 329.41   |
| Q09472                | EP300_HUMAN Histone acetyltransferase p300 OS=Homo sapiens GN=EP300 PE=1 SV=2                                          |           | 59.72    |
| Q09666                | AHNK_HUMAN Neuroblast differentiation-associated protein AHNAK OS=Homo sapiens GN=AHNAK PE=1 SV=2                      |           | 24526.76 |
| Q09MP3                | R51A2_HUMAN RAD51-associated protein 2 OS=Homo sapiens GN=RAD51AP2 PE=1 SV=1                                           |           |          |
| Q0JRZ9;B4DHK0;Q0JRZ9- | FCHO2_HUMAN FCH domain only protein 2 OS=Homo sapiens GN=FCHO2 PE=1 SV=2;>tr B4DHK0 B4DHK0_HUMAN cDNA FLJ60538,        | 3.54E-09  |          |
| Q0VAA2                | CN16B_HUMAN Uncharacterized protein C14orf166B OS=Homo sapiens GN=C14orf166B PE=2 SV=2                                 | 6.16E-06  |          |
| Q0VDR3                | APOBR_HUMAN Apolipoprotein B receptor OS=Homo sapiens GN=APOBR PE=1 SV=1                                               |           |          |
| Q0VDR3-3              | APOBR_HUMAN Isoform 3 of Apolipoprotein B receptor OS=Homo sapiens GN=APOBR                                            |           |          |
| Q0VDD8                | DYH14_HUMAN Dynein heavy chain 14, axonemal OS=Homo sapiens GN=DNAH14 PE=2 SV=3                                        |           |          |
| Q0VDD8-2              | DYH14_HUMAN Isoform 2 of Dynein heavy chain 14, axonemal OS=Homo sapiens GN=DNAH14                                     |           |          |
| Q0VDD8-3              | DYH14_HUMAN Isoform 3 of Dynein heavy chain 14, axonemal OS=Homo sapiens GN=DNAH14                                     |           |          |
| Q0VDD8-4              | DYH14_HUMAN Isoform 4 of Dynein heavy chain 14, axonemal OS=Homo sapiens GN=DNAH14                                     |           |          |
| Q0VDD8-4;Q0VDD8       | 4 DYH14_HUMAN Isoform 4 of Dynein heavy chain 14, axonemal OS=Homo sapiens GN=DNAH14;>sp Q0VDD8 DYH14_HUMAN Dynei      | 6.57E-12  |          |
| Q0VDF9                | HSP7E_HUMAN Heat shock 70 kDa protein 14 OS=Homo sapiens GN=HSPA14 PE=1 SV=1                                           | 1.64E-10  |          |
| Q0VF96                | CGNL1_HUMAN Cingulin-like protein 1 OS=Homo sapiens GN=CGNL1 PE=1 SV=2                                                 |           |          |
| Q0VF96-2              | CGNL1_HUMAN Isoform 2 of Cingulin-like protein 1 OS=Homo sapiens GN=CGNL1                                              |           |          |
| Q0VGL1                | CG059_HUMAN UPF0539 protein C7orf59 OS=Homo sapiens GN=C7orf59 PE=1 SV=1                                               |           |          |
| Q0ZGT2                | NEXN_HUMAN Nexilin OS=Homo sapiens GN=NEXN PE=1 SV=1                                                                   |           | 59.98    |
| Q0ZGT2-2              | NEXN_HUMAN Isoform 2 of Nexilin OS=Homo sapiens GN=NEXN                                                                |           | 59.98    |
| Q0ZGT2-3              | NEXN_HUMAN Isoform 3 of Nexilin OS=Homo sapiens GN=NEXN                                                                |           | 56.33    |
| Q0ZGT2;Q0ZGT2-2;Q0ZG  | NEXN_HUMAN Nexilin OS=Homo sapiens GN=NEXN PE=1 SV=1;>sp Q0ZGT2-2 NEXN_HUMAN Isoform 2 of Nexilin OS=Homo sapiens      | 2.58E-05  |          |
| Q10471                | GALT2_HUMAN Polypeptide N-acetylgalactosaminyltransferase 2 OS=Homo sapiens GN=GALNT2 PE=1 SV=1                        |           | 67.91    |
| Q10472                | GALT1_HUMAN Polypeptide N-acetylgalactosaminyltransferase 1 OS=Homo sapiens GN=GALNT1 PE=1 SV=1                        |           | 20.79    |
| Q10567                | AP1B1_HUMAN AP-1 complex subunit beta-1 OS=Homo sapiens GN=AP1B1 PE=1 SV=2                                             |           | 696.58   |
| Q10567-2              | AP1B1_HUMAN Isoform B of AP-1 complex subunit beta-1 OS=Homo sapiens GN=AP1B1                                          |           | 696.58   |
| Q10567-3              | AP1B1_HUMAN Isoform C of AP-1 complex subunit beta-1 OS=Homo sapiens GN=AP1B1                                          |           | 696.58   |
| Q10567-3;Q10567;Q1056 | 3 AP1B1_HUMAN Isoform C of AP-1 complex subunit beta-1 OS=Homo sapiens GN=AP1B1;>sp Q10567 AP1B1_HUMAN AP-1 comple>    | 0         |          |
| Q10567;Q10567-2;Q1056 | AP1B1_HUMAN AP-1 complex subunit beta-1 OS=Homo sapiens GN=AP1B1 PE=1 SV=2;>sp Q10567-2 AP1B1_HUMAN Isoform B of A     | 5.17E-118 |          |
| Q10570                | CPSF1_HUMAN Cleavage and polyadenylation specificity factor subunit 1 OS=Homo sapiens GN=CPSF1 PE=1 SV=2               |           | 31.57    |
| Q10588                | BST1_HUMAN ADP-ribosyl cyclase 2 OS=Homo sapiens GN=BST1 PE=1 SV=2                                                     |           |          |
| Q10589                | BST2_HUMAN Bone marrow stromal antigen 2 OS=Homo sapiens GN=BST2 PE=1 SV=1                                             |           | 150.94   |
| Q10713                | MPPA_HUMAN Mitochondrial-processing peptidase subunit alpha OS=Homo sapiens GN=PMPA PE=1 SV=2                          |           | 33.59    |



|                       |                                                                                                                                                  |           |          |
|-----------------------|--------------------------------------------------------------------------------------------------------------------------------------------------|-----------|----------|
| Q12756                | KIF1A_HUMAN Kinesin-like protein KIF1A OS=Homo sapiens GN=KIF1A PE=2 SV=2                                                                        |           |          |
| Q12756-2              | KIF1A_HUMAN Isoform 2 of Kinesin-like protein KIF1A OS=Homo sapiens GN=KIF1A                                                                     |           |          |
| Q12765                | SCRN1_HUMAN Secernin-1 OS=Homo sapiens GN=SCRN1 PE=1 SV=2                                                                                        | 1.91E-11  |          |
| Q12768                | STRUM_HUMAN WASH complex subunit strumpellin OS=Homo sapiens GN=KIAA0196 PE=1 SV=1                                                               | 1.26E-11  |          |
| Q12769                | NU160_HUMAN Nuclear pore complex protein Nup160 OS=Homo sapiens GN=NUP160 PE=1 SV=3                                                              |           |          |
| Q12769-3              | NU160_HUMAN Isoform 3 of Nuclear pore complex protein Nup160 OS=Homo sapiens GN=NUP160                                                           |           |          |
| Q12769;C9JIP0         | NU160_HUMAN Nuclear pore complex protein Nup160 OS=Homo sapiens GN=NUP160 PE=1 SV=3;>tr C9JIP0 C9JIP0_HUMAN Unchar                               | 2.27E-07  |          |
| Q12788                | TBL3_HUMAN Transducin beta-like protein 3 OS=Homo sapiens GN=TBL3 PE=1 SV=2                                                                      |           |          |
| Q12789                | TF3C1_HUMAN General transcription factor 3C polypeptide 1 OS=Homo sapiens GN=GTF3C1 PE=1 SV=4                                                    |           |          |
| Q12789-3              | TF3C1_HUMAN Isoform 2 of General transcription factor 3C polypeptide 1 OS=Homo sapiens GN=GTF3C1                                                 |           |          |
| Q12789;Q12789-3       | TF3C1_HUMAN General transcription factor 3C polypeptide 1 OS=Homo sapiens GN=GTF3C1 PE=1 SV=4;>sp Q12789-3 TF3C1_HUM/                            | 2.19E-22  |          |
| Q12791                | KCMA1_HUMAN Calcium-activated potassium channel subunit alpha-1 OS=Homo sapiens GN=KCNMA1 PE=1 SV=2                                              |           |          |
| Q12791-2              | KCMA1_HUMAN Isoform 2 of Calcium-activated potassium channel subunit alpha-1 OS=Homo sapiens GN=KCNMA1                                           |           |          |
| Q12791-3              | KCMA1_HUMAN Isoform 3 of Calcium-activated potassium channel subunit alpha-1 OS=Homo sapiens GN=KCNMA1                                           |           |          |
| Q12791-4              | KCMA1_HUMAN Isoform 4 of Calcium-activated potassium channel subunit alpha-1 OS=Homo sapiens GN=KCNMA1                                           |           |          |
| Q12791-5              | KCMA1_HUMAN Isoform 5 of Calcium-activated potassium channel subunit alpha-1 OS=Homo sapiens GN=KCNMA1                                           |           |          |
| Q12791-7              | KCMA1_HUMAN Isoform 7 of Calcium-activated potassium channel subunit alpha-1 OS=Homo sapiens GN=KCNMA1                                           |           |          |
| Q12792                | TWF1_HUMAN Twinfilin-1 OS=Homo sapiens GN=TWF1 PE=1 SV=3                                                                                         |           | 18.97    |
| Q12792-3              | TWF1_HUMAN Isoform 3 of Twinfilin-1 OS=Homo sapiens GN=TWF1                                                                                      |           | 18.97    |
| Q12792-4              | TWF1_HUMAN Isoform 4 of Twinfilin-1 OS=Homo sapiens GN=TWF1                                                                                      |           | 18.97    |
| Q12792;Q12792-3;Q1279 | TWF1_HUMAN Twinfilin-1 OS=Homo sapiens GN=TWF1 PE=1 SV=3;>sp Q12792-3 TWF1_HUMAN Isoform 3 of Twinfilin-1 OS=Homo s                              | 1.85E-81  |          |
| Q12797                | ASPH_HUMAN Aspartyl/asparaginyl beta-hydroxylase OS=Homo sapiens GN=ASPH PE=1 SV=3                                                               |           |          |
| Q12797-2              | ASPH_HUMAN Isoform Junctate of Aspartyl/asparaginyl beta-hydroxylase OS=Homo sapiens GN=ASPH                                                     |           |          |
| Q12797-3              | ASPH_HUMAN Isoform Junctin-1 of Aspartyl/asparaginyl beta-hydroxylase OS=Homo sapiens GN=ASPH                                                    |           | 41.77    |
| Q12797-4              | ASPH_HUMAN Isoform Junctin-2 of Aspartyl/asparaginyl beta-hydroxylase OS=Homo sapiens GN=ASPH                                                    |           | 41.77    |
| Q12797;B4E2K4         | ASPH_HUMAN Aspartyl/asparaginyl beta-hydroxylase OS=Homo sapiens GN=ASPH PE=1 SV=3;>tr B4E2K4 B4E2K4_HUMAN cDNA FL                               | 3.97E-104 |          |
| Q12799                | TCP10_HUMAN T-complex protein 10A homolog OS=Homo sapiens GN=TCP10 PE=2 SV=3                                                                     |           | 35.33    |
| Q12799-2              | TCP10_HUMAN Isoform 2 of T-complex protein 10A homolog OS=Homo sapiens GN=TCP10                                                                  |           | 35.33    |
| Q12800;Q12800-4;Q1280 | TFCP2_HUMAN Alpha-globin transcription factor CP2 OS=Homo sapiens GN=TFCP2 PE=1 SV=2;>sp Q12800-4 TFCP2_HUMAN Isoform                            | 2.07E-92  |          |
| Q12802                | AKP13_HUMAN A-kinase anchor protein 13 OS=Homo sapiens GN=AKAP13 PE=1 SV=2                                                                       |           |          |
| Q12802-2              | AKP13_HUMAN Isoform 2 of A-kinase anchor protein 13 OS=Homo sapiens GN=AKAP13                                                                    |           |          |
| Q12802-3              | AKP13_HUMAN Isoform 3 of A-kinase anchor protein 13 OS=Homo sapiens GN=AKAP13                                                                    |           |          |
| Q12802-4              | AKP13_HUMAN Isoform 4 of A-kinase anchor protein 13 OS=Homo sapiens GN=AKAP13                                                                    |           |          |
| Q12802-6              | AKP13_HUMAN Isoform 6 of A-kinase anchor protein 13 OS=Homo sapiens GN=AKAP13                                                                    |           |          |
| Q12802-7              | AKP13_HUMAN Isoform 7 of A-kinase anchor protein 13 OS=Homo sapiens GN=AKAP13                                                                    |           |          |
| Q12805;Q12805-3;Q1280 | FBLN3_HUMAN EGF-containing fibulin-like extracellular matrix protein 1 OS=Homo sapiens GN=EFEMP1 PE=1 SV=2;>sp Q12805-3 FI                       | 1.97E-72  |          |
| Q12816                | TROP_HUMAN Trophinin OS=Homo sapiens GN=TRO PE=1 SV=3                                                                                            |           | 21.92    |
| Q12824                | SNF5_HUMAN SWI/SNF-related matrix-associated actin-dependent regulator of chromatin subfamily B member 1 OS=Homo sapiens GN=SMARCB1 PE=1 SV=2    |           |          |
| Q12824-2              | SNF5_HUMAN Isoform B of SWI/SNF-related matrix-associated actin-dependent regulator of chromatin subfamily B member 1 OS=Homo sapiens GN=SMARCB1 |           |          |
| Q12824;Q12824-2       | SNF5_HUMAN SWI/SNF-related matrix-associated actin-dependent regulator of chromatin subfamily B member 1 OS=Homo sapiens G                       | 2.39E-11  |          |
| Q12829                | RB40B_HUMAN Ras-related protein Rab-40B OS=Homo sapiens GN=RAB40B PE=2 SV=1                                                                      |           |          |
| Q12830                | BPTF_HUMAN Nucleosome-remodeling factor subunit BPTF OS=Homo sapiens GN=BPTF PE=1 SV=3                                                           |           |          |
| Q12830-2              | BPTF_HUMAN Isoform 2 of Nucleosome-remodeling factor subunit BPTF OS=Homo sapiens GN=BPTF                                                        |           |          |
| Q12830-4              | BPTF_HUMAN Isoform 4 of Nucleosome-remodeling factor subunit BPTF OS=Homo sapiens GN=BPTF                                                        |           |          |
| Q12830;Q12830-2;Q1283 | BPTF_HUMAN Nucleosome-remodeling factor subunit BPTF OS=Homo sapiens GN=BPTF PE=1 SV=3;>sp Q12830-2 BPTF_HUMAN Isof                              | 4.10E-24  |          |
| Q12834                | CDC20_HUMAN Cell division cycle protein 20 homolog OS=Homo sapiens GN=CDC20 PE=1 SV=2                                                            | 1.21E-05  |          |
| Q12840                | KIF5A_HUMAN Kinesin heavy chain isoform 5A OS=Homo sapiens GN=KIF5A PE=1 SV=2                                                                    |           | 39.76    |
| Q12841                | FSTL1_HUMAN Follistatin-related protein 1 OS=Homo sapiens GN=FSTL1 PE=1 SV=1                                                                     |           | 27.56    |
| Q12846                | STX4_HUMAN Syntaxin-4 OS=Homo sapiens GN=STX4 PE=1 SV=2                                                                                          |           | 112.8    |
| Q12849                | GRSF1_HUMAN G-rich sequence factor 1 OS=Homo sapiens GN=GRSF1 PE=1 SV=3                                                                          |           |          |
| Q12857                | NFIA_HUMAN Nuclear factor 1 A-type OS=Homo sapiens GN=NFIA PE=1 SV=2                                                                             |           |          |
| Q12857-2              | NFIA_HUMAN Isoform 2 of Nuclear factor 1 A-type OS=Homo sapiens GN=NFIA                                                                          |           |          |
| Q12873                | CHD3_HUMAN Chromodomain-helicase-DNA-binding protein 3 OS=Homo sapiens GN=CHD3 PE=1 SV=3                                                         |           | 687.51   |
| Q12873-2              | CHD3_HUMAN Isoform 2 of Chromodomain-helicase-DNA-binding protein 3 OS=Homo sapiens GN=CHD3                                                      |           | 687.51   |
| Q12873;D3DTQ9;Q12873- | CHD3_HUMAN Chromodomain-helicase-DNA-binding protein 3 OS=Homo sapiens GN=CHD3 PE=1 SV=3;>tr D3DTQ9 D3DTQ9_HUMA                                  | 4.02E-16  |          |
| Q12874                | SF3A3_HUMAN Splicing factor 3A subunit 3 OS=Homo sapiens GN=SF3A3 PE=1 SV=1                                                                      |           | 295.71   |
| Q12882                | DPYD_HUMAN Dihydropyrimidine dehydrogenase [NADP+] OS=Homo sapiens GN=DPYD PE=1 SV=2                                                             |           |          |
| Q12884                | SEPR_HUMAN Sepsin OS=Homo sapiens GN=SEPR PE=1 SV=5                                                                                              |           | 7.99E-06 |
| Q12888                | TP53B_HUMAN Tumor suppressor p53-binding protein 1 OS=Homo sapiens GN=TP53BP1 PE=1 SV=2                                                          |           |          |
| Q12888-2              | TP53B_HUMAN Isoform 2 of Tumor suppressor p53-binding protein 1 OS=Homo sapiens GN=TP53BP1                                                       |           |          |
| Q12888-2;Q12888       | TP53B_HUMAN Isoform 2 of Tumor suppressor p53-binding protein 1 OS=Homo sapiens GN=TP53BP1;>sp Q12888 TP53B_HUMAN                                | 7.65E-06  |          |

|                            |                                                                                                                           |           |          |
|----------------------------|---------------------------------------------------------------------------------------------------------------------------|-----------|----------|
| Q12904                     | AIMP1_HUMAN Aminoacyl tRNA synthase complex-interacting multifunctional protein 1 OS=Homo sapiens GN=AIMP1 PE=1 SV=2      |           | 621.48   |
| Q12905                     | ILF2_HUMAN Interleukin enhancer-binding factor 2 OS=Homo sapiens GN=ILF2 PE=1 SV=2                                        |           | 650.11   |
| Q12906                     | ILF3_HUMAN Interleukin enhancer-binding factor 3 OS=Homo sapiens GN=ILF3 PE=1 SV=3                                        |           | 1082.52  |
| Q12906-2                   | ILF3_HUMAN Isoform 2 of Interleukin enhancer-binding factor 3 OS=Homo sapiens GN=ILF3                                     |           | 1082.52  |
| Q12906-3                   | ILF3_HUMAN Isoform 3 of Interleukin enhancer-binding factor 3 OS=Homo sapiens GN=ILF3                                     |           | 1082.52  |
| Q12906-4                   | ILF3_HUMAN Isoform 4 of Interleukin enhancer-binding factor 3 OS=Homo sapiens GN=ILF3                                     |           | 1082.52  |
| Q12906-5                   | ILF3_HUMAN Isoform 5 of Interleukin enhancer-binding factor 3 OS=Homo sapiens GN=ILF3                                     |           | 1082.52  |
| Q12906-6                   | ILF3_HUMAN Isoform 6 of Interleukin enhancer-binding factor 3 OS=Homo sapiens GN=ILF3                                     |           | 1082.52  |
| Q12906-6;Q12906-4          | 6 ILF3_HUMAN Isoform 6 of Interleukin enhancer-binding factor 3 OS=Homo sapiens GN=ILF3;>sp Q12906-4 ILF3_HUMAN Isoform 4 | 1.82E-187 |          |
| Q12906;C9JFV5;Q12906-5     | ILF3_HUMAN Interleukin enhancer-binding factor 3 OS=Homo sapiens GN=ILF3 PE=1 SV=3;>tr C9JFV5 C9JFV5_HUMAN Uncharacteri   | 2.31E-184 |          |
| Q12907                     | LMAN2_HUMAN Vesicular integral-membrane protein VIP36 OS=Homo sapiens GN=LMAN2 PE=1 SV=1                                  |           | 128.08   |
| Q12912                     | LRMP_HUMAN Lymphoid-restricted membrane protein OS=Homo sapiens GN=LRMP PE=1 SV=3                                         |           | 65.16    |
| Q12912-2                   | LRMP_HUMAN Isoform 2 of Lymphoid-restricted membrane protein OS=Homo sapiens GN=LRMP                                      |           | 65.16    |
| Q12912;Q12912-2            | LRMP_HUMAN Lymphoid-restricted membrane protein OS=Homo sapiens GN=LRMP PE=1 SV=3;>sp Q12912-2 LRMP_HUMAN Isoform 2       | 1.01E-103 |          |
| Q12923-4;Q12923;Q12924     | PTN13_HUMAN Isoform 4 of Tyrosine-protein phosphatase non-receptor type 13 OS=Homo sapiens GN=PTN13;>sp Q12923 PTN13      | 1.51E-05  |          |
| Q12926                     | ELAV2_HUMAN ELAV-like protein 2 OS=Homo sapiens GN=ELAVL2 PE=1 SV=2                                                       |           |          |
| Q12926-2                   | ELAV2_HUMAN Isoform 2 of ELAV-like protein 2 OS=Homo sapiens GN=ELAVL2                                                    |           |          |
| Q12929                     | EPS8_HUMAN Epidermal growth factor receptor kinase substrate 8 OS=Homo sapiens GN=EPS8 PE=1 SV=1                          |           |          |
| Q12931                     | TRAP1_HUMAN Heat shock protein 75 kDa, mitochondrial OS=Homo sapiens GN=TRAP1 PE=1 SV=3                                   |           | 541.98   |
| Q12933;Q12933-3;Q12934     | TRAF2_HUMAN TNF receptor-associated factor 2 OS=Homo sapiens GN=TRAF2 PE=1 SV=2;>sp Q12933-3 TRAF2_HUMAN Isoform 3        | 5.98E-08  |          |
| Q12955                     | ANK3_HUMAN Ankyrin-3 OS=Homo sapiens GN=ANK3 PE=1 SV=3                                                                    |           |          |
| Q12959                     | DLG1_HUMAN Disks large homolog 1 OS=Homo sapiens GN=DLG1 PE=1 SV=2                                                        |           | 145.84   |
| Q12959-2                   | DLG1_HUMAN Isoform 2 of Disks large homolog 1 OS=Homo sapiens GN=DLG1                                                     |           | 145.84   |
| Q12959-2;Q12959-7;Q12959-3 | 2 DLG1_HUMAN Isoform 2 of Disks large homolog 1 OS=Homo sapiens GN=DLG1;>sp Q12959-7 DLG1_HUMAN Isoform 7 of Disks lai    | 5.03E-95  |          |
| Q12959-3                   | DLG1_HUMAN Isoform 3 of Disks large homolog 1 OS=Homo sapiens GN=DLG1                                                     |           | 145.84   |
| Q12959-4                   | DLG1_HUMAN Isoform 4 of Disks large homolog 1 OS=Homo sapiens GN=DLG1                                                     |           | 145.84   |
| Q12959-5                   | DLG1_HUMAN Isoform 5 of Disks large homolog 1 OS=Homo sapiens GN=DLG1                                                     |           | 145.84   |
| Q12959-6                   | DLG1_HUMAN Isoform 6 of Disks large homolog 1 OS=Homo sapiens GN=DLG1                                                     |           | 145.84   |
| Q12959-7                   | DLG1_HUMAN Isoform 7 of Disks large homolog 1 OS=Homo sapiens GN=DLG1                                                     |           | 145.84   |
| Q12965                     | MYO1E_HUMAN Myosin-Ie OS=Homo sapiens GN=MYO1E PE=1 SV=2                                                                  |           |          |
| Q12968                     | NFAC3_HUMAN Nuclear factor of activated T-cells, cytoplasmic 3 OS=Homo sapiens GN=NFATC3 PE=1 SV=1                        |           | 21.61    |
| Q12968-2                   | NFAC3_HUMAN Isoform 2 of Nuclear factor of activated T-cells, cytoplasmic 3 OS=Homo sapiens GN=NFATC3                     |           | 21.61    |
| Q12968-3                   | NFAC3_HUMAN Isoform 3 of Nuclear factor of activated T-cells, cytoplasmic 3 OS=Homo sapiens GN=NFATC3                     |           | 21.61    |
| Q12968-4                   | NFAC3_HUMAN Isoform 4 of Nuclear factor of activated T-cells, cytoplasmic 3 OS=Homo sapiens GN=NFATC3                     |           | 21.61    |
| Q12968-5                   | NFAC3_HUMAN Isoform 5 of Nuclear factor of activated T-cells, cytoplasmic 3 OS=Homo sapiens GN=NFATC3                     |           | 21.61    |
| Q12968-6                   | NFAC3_HUMAN Isoform 6 of Nuclear factor of activated T-cells, cytoplasmic 3 OS=Homo sapiens GN=NFATC3                     |           | 21.61    |
| Q12972                     | PPP1R8_HUMAN Nuclear inhibitor of protein phosphatase 1 OS=Homo sapiens GN=PPP1R8 PE=1 SV=2                               |           | 74.89    |
| Q12972-2                   | PPP1R8_HUMAN Isoform Beta of Nuclear inhibitor of protein phosphatase 1 OS=Homo sapiens GN=PPP1R8                         |           | 74.62    |
| Q12972;Q12972-2            | PPP1R8_HUMAN Nuclear inhibitor of protein phosphatase 1 OS=Homo sapiens GN=PPP1R8 PE=1 SV=2;>sp Q12972-2 PPP1R8_HUMAN     | 6.43E-05  |          |
| Q12974                     | TP4A2_HUMAN Protein tyrosine phosphatase type IVA 2 OS=Homo sapiens GN=PTP4A2 PE=1 SV=1                                   |           | 40.26    |
| Q12979                     | ABR_HUMAN Active breakpoint cluster region-related protein OS=Homo sapiens GN=ABR PE=1 SV=1                               |           |          |
| Q12979-2                   | ABR_HUMAN Isoform Short of Active breakpoint cluster region-related protein OS=Homo sapiens GN=ABR                        |           |          |
| Q12979-2;Q12979            | 2 ABR_HUMAN Isoform Short of Active breakpoint cluster region-related protein OS=Homo sapiens GN=ABR;>sp Q12979 ABR_HUMA  | 1.60E-25  |          |
| Q12980                     | NPRL3_HUMAN Nitrogen permease regulator 3-like protein OS=Homo sapiens GN=NPRL3 PE=1 SV=1                                 |           | 22.37    |
| Q12983                     | BNIP3_HUMAN BCL2/adenovirus E1B 19 kDa protein-interacting protein 3 OS=Homo sapiens GN=BNIP3 PE=1 SV=2                   |           |          |
| Q12996                     | CSTF3_HUMAN Cleavage stimulation factor subunit 3 OS=Homo sapiens GN=CSTF3 PE=1 SV=1                                      |           | 472.93   |
| Q13011                     | ECH1_HUMAN Delta(3,5)-Delta(2,4)-dienoyl-CoA isomerase, mitochondrial OS=Homo sapiens GN=ECH1 PE=1 SV=2                   |           | 209.55   |
| Q13017;Q13017-2            | RHG05_HUMAN Rho GTPase-activating protein 5 OS=Homo sapiens GN=ARHGAP5 PE=1 SV=2;>sp Q13017-2 RHG05_HUMAN Isoform         | 5.08E-15  |          |
| Q13029                     | PRDM2_HUMAN PR domain zinc finger protein 2 OS=Homo sapiens GN=PRDM2 PE=1 SV=3                                            |           | 33.62    |
| Q13029-2                   | PRDM2_HUMAN Isoform 2 of PR domain zinc finger protein 2 OS=Homo sapiens GN=PRDM2                                         |           | 33.62    |
| Q13029-3                   | PRDM2_HUMAN Isoform 3 of PR domain zinc finger protein 2 OS=Homo sapiens GN=PRDM2                                         |           | 4.79     |
| Q13033;Q13033-2            | STRN3_HUMAN Striatin-3 OS=Homo sapiens GN=STRN3 PE=1 SV=3;>sp Q13033-2 STRN3_HUMAN Isoform Alpha of Striatin-3 OS=H       | 1.68E-10  |          |
| Q13042                     | CDC16_HUMAN Cell division cycle protein 16 homolog OS=Homo sapiens GN=CDC16 PE=1 SV=2                                     |           |          |
| Q13042-2                   | CDC16_HUMAN Isoform 2 of Cell division cycle protein 16 homolog OS=Homo sapiens GN=CDC16                                  |           |          |
| Q13042-3                   | CDC16_HUMAN Isoform 3 of Cell division cycle protein 16 homolog OS=Homo sapiens GN=CDC16                                  |           |          |
| Q13043;Q13043-2            | STK4_HUMAN Serine/threonine-protein kinase 4 OS=Homo sapiens GN=STK4 PE=1 SV=2;>sp Q13043-2 STK4_HUMAN Isoform 2 of       | 6.06E-51  |          |
| Q13045                     | FLII_HUMAN Protein flightless-1 homolog OS=Homo sapiens GN=FLII PE=1 SV=2                                                 |           | 7.89E-34 |
| Q13049                     | TRIM32_HUMAN E3 ubiquitin-protein ligase TRIM32 OS=Homo sapiens GN=TRIM32 PE=1 SV=2                                       |           | 6.64E-07 |
| Q13057                     | COASY_HUMAN Bifunctional coenzyme A synthase OS=Homo sapiens GN=COASY PE=1 SV=4                                           |           |          |
| Q13057-2                   | COASY_HUMAN Isoform 2 of Bifunctional coenzyme A synthase OS=Homo sapiens GN=COASY                                        |           |          |
| Q13057-2;Q13057            | 2 COASY_HUMAN Isoform 2 of Bifunctional coenzyme A synthase OS=Homo sapiens GN=COASY;>sp Q13057 COASY_HUMAN Bifuncti      | 6.86E-34  |          |

|                            |                                                                                                                          |            |        |
|----------------------------|--------------------------------------------------------------------------------------------------------------------------|------------|--------|
| Q13084                     | RM28_HUMAN 39S ribosomal protein L28, mitochondrial OS=Homo sapiens GN=MRPL28 PE=1 SV=4                                  |            | 138.84 |
| Q13085                     | ACACA_HUMAN Acetyl-CoA carboxylase 1 OS=Homo sapiens GN=ACACA PE=1 SV=2                                                  |            |        |
| Q13085-2                   | ACACA_HUMAN Isoform 2 of Acetyl-CoA carboxylase 1 OS=Homo sapiens GN=ACACA                                               |            |        |
| Q13085-3                   | ACACA_HUMAN Isoform 3 of Acetyl-CoA carboxylase 1 OS=Homo sapiens GN=ACACA                                               |            |        |
| Q13085-4                   | ACACA_HUMAN Isoform 4 of Acetyl-CoA carboxylase 1 OS=Homo sapiens GN=ACACA                                               |            |        |
| Q13085-4;Q13085;Q13087     | 4 ACACA_HUMAN Isoform 4 of Acetyl-CoA carboxylase 1 OS=Homo sapiens GN=ACACA;>sp Q13085 ACACA_HUMAN Acetyl-CoA carb      | 3.19E-31   |        |
| Q13087;Q13087-2            | PDIA2_HUMAN Protein disulfide-isomerase A2 OS=Homo sapiens GN=PDIA2 PE=1 SV=2;>sp Q13087-2 PDIA2_HUMAN Isoform 2 of P    | 6.93E-29   |        |
| Q13098                     | CSN1_HUMAN COP9 signalosome complex subunit 1 OS=Homo sapiens GN=GPS1 PE=1 SV=4                                          |            |        |
| Q13098-5                   | CSN1_HUMAN Isoform 4 of COP9 signalosome complex subunit 1 OS=Homo sapiens GN=GPS1                                       |            |        |
| Q13098-6                   | CSN1_HUMAN Isoform 3 of COP9 signalosome complex subunit 1 OS=Homo sapiens GN=GPS1                                       |            |        |
| Q13098-6;Q13098-7;Q13098-7 | 6 CSN1_HUMAN Isoform 3 of COP9 signalosome complex subunit 1 OS=Homo sapiens GN=GPS1;>sp Q13098-7 CSN1_HUMAN Isofor      | 7.79E-10   |        |
| Q13098-7                   | CSN1_HUMAN Isoform 2 of COP9 signalosome complex subunit 1 OS=Homo sapiens GN=GPS1                                       |            |        |
| Q13098-7;Q13098;Q13098-7   | 7 CSN1_HUMAN Isoform 2 of COP9 signalosome complex subunit 1 OS=Homo sapiens GN=GPS1;>sp Q13098 CSN1_HUMAN COP9 si       | 2.47E-15   |        |
| Q13107;Q13107-2            | UBP4_HUMAN Ubiquitin carboxyl-terminal hydrolase 4 OS=Homo sapiens GN=USP4 PE=1 SV=3;>sp Q13107-2 UBP4_HUMAN Isoform     | 1.39E-07   |        |
| Q13123                     | RED_HUMAN Protein Red OS=Homo sapiens GN=IK PE=1 SV=3                                                                    |            | 72.9   |
| Q13126                     | MTAP_HUMAN S-methyl-5-thioadenosine phosphorylase OS=Homo sapiens GN=MTAP PE=1 SV=2                                      | 1.25E-75   |        |
| Q13131-2;Q13131            | 2 AAPK1_HUMAN Isoform 2 of 5-AMP-activated protein kinase catalytic subunit alpha-1 OS=Homo sapiens GN=PRKAA1;>sp Q13131 | 3.46E-40   |        |
| Q13136                     | LIPA1_HUMAN Liprin-alpha-1 OS=Homo sapiens GN=PPFIA1 PE=1 SV=1                                                           |            | 59.43  |
| Q13136-2                   | LIPA1_HUMAN Isoform 2 of Liprin-alpha-1 OS=Homo sapiens GN=PPFIA1                                                        |            | 59.43  |
| Q13136;Q13136-2            | LIPA1_HUMAN Liprin-alpha-1 OS=Homo sapiens GN=PPFIA1 PE=1 SV=1;>sp Q13136-2 LIPA1_HUMAN Isoform 2 of Liprin-alpha-1 OS   | 0.00013768 |        |
| Q13137                     | CACO2_HUMAN Calcium-binding and coiled-coil domain-containing protein 2 OS=Homo sapiens GN=CALCOCO2 PE=1 SV=1            | 3.67E-06   |        |
| Q13144                     | EI2BE_HUMAN Translation initiation factor eIF-2B subunit epsilon OS=Homo sapiens GN=EIF2B5 PE=1 SV=3                     |            | 61.81  |
| Q13148                     | TADBP_HUMAN TAR DNA-binding protein 43 OS=Homo sapiens GN=TARDBP PE=1 SV=1                                               |            | 262.56 |
| Q13148-2                   | TADBP_HUMAN Isoform 2 of TAR DNA-binding protein 43 OS=Homo sapiens GN=TARDBP                                            |            | 262.56 |
| Q13148-2;E2PU12;Q13148-2   | 2 TADBP_HUMAN Isoform 2 of TAR DNA-binding protein 43 OS=Homo sapiens GN=TARDBP;>tr E2PU12 E2PU12_HUMAN TAR DNA bin      | 1.76E-95   |        |
| Q13148-3                   | TADBP_HUMAN Isoform 3 of TAR DNA-binding protein 43 OS=Homo sapiens GN=TARDBP                                            |            | 74.33  |
| Q13151                     | ROA0_HUMAN Heterogeneous nuclear ribonucleoprotein A0 OS=Homo sapiens GN=HNRNPA0 PE=1 SV=1                               |            | 390.62 |
| Q13153-2;Q13153            | 2 PAK1_HUMAN Isoform 2 of Serine/threonine-protein kinase PAK 1 OS=Homo sapiens GN=PAK1;>sp Q13153 PAK1_HUMAN Serine/t   | 3.31E-17   |        |
| Q13155                     | AIMP2_HUMAN Aminoacyl tRNA synthase complex-interacting multifunctional protein 2 OS=Homo sapiens GN=AIMP2 PE=1 SV=2     |            | 192.96 |
| Q13158                     | FADD_HUMAN Protein FADD OS=Homo sapiens GN=FADD PE=1 SV=1                                                                | 6.29E-62   |        |
| Q13162                     | PRDX4_HUMAN Peroxiredoxin-4 OS=Homo sapiens GN=PRDX4 PE=1 SV=1                                                           |            | 785.69 |
| Q13164                     | MK07_HUMAN Mitogen-activated protein kinase 7 OS=Homo sapiens GN=MAPK7 PE=1 SV=2                                         |            |        |
| Q13164-2                   | MK07_HUMAN Isoform 2 of Mitogen-activated protein kinase 7 OS=Homo sapiens GN=MAPK7                                      |            |        |
| Q13164-3                   | MK07_HUMAN Isoform 3 of Mitogen-activated protein kinase 7 OS=Homo sapiens GN=MAPK7                                      |            |        |
| Q13177                     | PAK2_HUMAN Serine/threonine-protein kinase PAK 2 OS=Homo sapiens GN=PAK2 PE=1 SV=3                                       | 1.20E-156  |        |
| Q13185                     | CBX3_HUMAN Chromobox protein homolog 3 OS=Homo sapiens GN=CBX3 PE=1 SV=4                                                 |            | 806.67 |
| Q13188                     | STK3_HUMAN Serine/threonine-protein kinase 3 OS=Homo sapiens GN=STK3 PE=1 SV=2                                           | 6.58E-36   |        |
| Q13190                     | STX5_HUMAN Syntaxin-5 OS=Homo sapiens GN=STX5 PE=1 SV=2                                                                  |            | 108.11 |
| Q13190-2                   | STX5_HUMAN Isoform 2 of Syntaxin-5 OS=Homo sapiens GN=STX5                                                               |            | 108.11 |
| Q13190-3                   | STX5_HUMAN Isoform 3 of Syntaxin-5 OS=Homo sapiens GN=STX5                                                               |            | 108.11 |
| Q13190;Q13190-2;Q13190-3   | STX5_HUMAN Syntaxin-5 OS=Homo sapiens GN=STX5 PE=1 SV=2;>sp Q13190-2 STX5_HUMAN Isoform 2 of Syntaxin-5 OS=Homo          | 4.46E-14   |        |
| Q13200                     | PSMD2_HUMAN 26S proteasome non-ATPase regulatory subunit 2 OS=Homo sapiens GN=PSMD2 PE=1 SV=3                            |            | 634.07 |
| Q13206                     | DDX10_HUMAN Probable ATP-dependent RNA helicase DDX10 OS=Homo sapiens GN=DDX10 PE=1 SV=2                                 |            |        |
| Q13216                     | ERCC8_HUMAN DNA excision repair protein ERCC-8 OS=Homo sapiens GN=ERCC8 PE=1 SV=1                                        |            |        |
| Q13216-2                   | ERCC8_HUMAN Isoform 2 of DNA excision repair protein ERCC-8 OS=Homo sapiens GN=ERCC8                                     |            |        |
| Q13217                     | DNJC3_HUMAN DnaJ homolog subfamily C member 3 OS=Homo sapiens GN=DNAJC3 PE=1 SV=1                                        |            | 160.47 |
| Q13228                     | SBP1_HUMAN Selenium-binding protein 1 OS=Homo sapiens GN=SELENBP1 PE=1 SV=2                                              |            |        |
| Q13228-2                   | SBP1_HUMAN Isoform 2 of Selenium-binding protein 1 OS=Homo sapiens GN=SELENBP1                                           |            |        |
| Q13228;B4E1F3;Q13228-2     | SBP1_HUMAN Selenium-binding protein 1 OS=Homo sapiens GN=SELENBP1 PE=1 SV=2;>tr B4E1F3 B4E1F3_HUMAN cDNA FLJ61035        | 0          |        |
| Q13232                     | NDK3_HUMAN Nucleoside diphosphate kinase 3 OS=Homo sapiens GN=NME3 PE=1 SV=2                                             | 3.91E-53   |        |
| Q13239                     | SLAP1_HUMAN Src-like-adaptor OS=Homo sapiens GN=SLA PE=1 SV=3                                                            |            |        |
| Q13242                     | SRSF9_HUMAN Serine/arginine-rich splicing factor 9 OS=Homo sapiens GN=SRSF9 PE=1 SV=1                                    |            | 476.52 |
| Q13243                     | SRSF5_HUMAN Serine/arginine-rich splicing factor 5 OS=Homo sapiens GN=SRSF5 PE=1 SV=1                                    |            | 179.67 |
| Q13243-2                   | SRSF5_HUMAN Isoform SRP40-2 of Serine/arginine-rich splicing factor 5 OS=Homo sapiens GN=SRSF5                           |            | 96.14  |
| Q13243-3                   | SRSF5_HUMAN Isoform SRP40-4 of Serine/arginine-rich splicing factor 5 OS=Homo sapiens GN=SRSF5                           |            | 83.53  |
| Q13243;Q13243-3            | SRSF5_HUMAN Serine/arginine-rich splicing factor 5 OS=Homo sapiens GN=SRSF5 PE=1 SV=1;>sp Q13243-3 SRSF5_HUMAN Isoform   | 5.83E-24   |        |
| Q13247                     | SRSF6_HUMAN Serine/arginine-rich splicing factor 6 OS=Homo sapiens GN=SRSF6 PE=1 SV=2                                    |            | 69.99  |
| Q13247-2                   | SRSF6_HUMAN Isoform SRP55-2 of Serine/arginine-rich splicing factor 6 OS=Homo sapiens GN=SRSF6                           |            | 28.9   |
| Q13247-3                   | SRSF6_HUMAN Isoform SRP55-3 of Serine/arginine-rich splicing factor 6 OS=Homo sapiens GN=SRSF6                           |            | 69.99  |
| Q13247;Q13247-3            | SRSF6_HUMAN Serine/arginine-rich splicing factor 6 OS=Homo sapiens GN=SRSF6 PE=1 SV=2;>sp Q13247-3 SRSF6_HUMAN Isoform   | 7.14E-38   |        |
| Q13255                     | GRM1_HUMAN Metabotropic glutamate receptor 1 OS=Homo sapiens GN=GRM1 PE=1 SV=3                                           |            |        |

|                       |                                                                                                                                      |           |         |
|-----------------------|--------------------------------------------------------------------------------------------------------------------------------------|-----------|---------|
| Q13255-2              | GRM1_HUMAN Isoform Beta of Metabotropic glutamate receptor 1 OS=Homo sapiens GN=GRM1                                                 |           |         |
| Q13257                | MD2L1_HUMAN Mitotic spindle assembly checkpoint protein MAD2A OS=Homo sapiens GN=MAD2L1 PE=1 SV=1                                    |           | 111.16  |
| Q13263                | TIF1B_HUMAN Transcription intermediary factor 1-beta OS=Homo sapiens GN=TRIM28 PE=1 SV=5                                             |           | 319.3   |
| Q13263-2              | TIF1B_HUMAN Isoform 2 of Transcription intermediary factor 1-beta OS=Homo sapiens GN=TRIM28                                          |           | 316.38  |
| Q13263;Q13263-2       | TIF1B_HUMAN Transcription intermediary factor 1-beta OS=Homo sapiens GN=TRIM28 PE=1 SV=5;>sp Q13263-2 TIF1B_HUMAN Iso                | 0         |         |
| Q13268;Q13268-2       | DHRS2_HUMAN Dehydrogenase/reductase SDR family member 2 OS=Homo sapiens GN=DHRS2 PE=1 SV=3;>sp Q13268-2 DHRS2_f                      | 2.77E-21  |         |
| Q13277                | STX3_HUMAN Syntaxin-3 OS=Homo sapiens GN=STX3 PE=1 SV=3                                                                              |           | 88.18   |
| Q13277-2              | STX3_HUMAN Isoform B of Syntaxin-3 OS=Homo sapiens GN=STX3                                                                           |           | 88.18   |
| Q13277;Q13277-2       | STX3_HUMAN Syntaxin-3 OS=Homo sapiens GN=STX3 PE=1 SV=3;>sp Q13277-2 STX3_HUMAN Isoform B of Syntaxin-3 OS=Homo :                    | 5.60E-13  |         |
| Q13283                | G3BP1_HUMAN Ras GTPase-activating protein-binding protein 1 OS=Homo sapiens GN=G3BP1 PE=1 SV=1                                       |           | 923.75  |
| Q13287                | NMI_HUMAN N-myc-interactor OS=Homo sapiens GN=NMI PE=1 SV=2                                                                          | 8.68E-07  |         |
| Q13303                | KCAB2_HUMAN Voltage-gated potassium channel subunit beta-2 OS=Homo sapiens GN=KCAB2 PE=1 SV=2                                        |           |         |
| Q13303-2              | KCAB2_HUMAN Isoform 2 of Voltage-gated potassium channel subunit beta-2 OS=Homo sapiens GN=KCAB2                                     |           |         |
| Q13303-3              | KCAB2_HUMAN Isoform 3 of Voltage-gated potassium channel subunit beta-2 OS=Homo sapiens GN=KCAB2                                     |           |         |
| Q13303-3;Q13303;Q1330 | 3 KCAB2_HUMAN Isoform 3 of Voltage-gated potassium channel subunit beta-2 OS=Homo sapiens GN=KCAB2;>sp Q13303 KCAB2_                 | 2.64E-15  |         |
| Q13308                | PTK7_HUMAN Inactive tyrosine-protein kinase 7 OS=Homo sapiens GN=PTK7 PE=1 SV=2                                                      |           | 143.56  |
| Q13308-2              | PTK7_HUMAN Isoform 2 of Inactive tyrosine-protein kinase 7 OS=Homo sapiens GN=PTK7                                                   |           | 143.56  |
| Q13308-3              | PTK7_HUMAN Isoform 3 of Inactive tyrosine-protein kinase 7 OS=Homo sapiens GN=PTK7                                                   |           | 134.76  |
| Q13308-4              | PTK7_HUMAN Isoform 4 of Inactive tyrosine-protein kinase 7 OS=Homo sapiens GN=PTK7                                                   |           | 137.76  |
| Q13308-5              | PTK7_HUMAN Isoform 5 of Inactive tyrosine-protein kinase 7 OS=Homo sapiens GN=PTK7                                                   |           | 104.05  |
| Q13308;Q13308-2;Q1330 | PTK7_HUMAN Inactive tyrosine-protein kinase 7 OS=Homo sapiens GN=PTK7 PE=1 SV=2;>sp Q13308-2 PTK7_HUMAN Isoform 2 of 1               | 6.72E-32  |         |
| Q13310                | PABP4_HUMAN Polyadenylate-binding protein 4 OS=Homo sapiens GN=PABPC4 PE=1 SV=1                                                      |           | 1343.92 |
| Q13310-2              | PABP4_HUMAN Isoform 2 of Polyadenylate-binding protein 4 OS=Homo sapiens GN=PABPC4                                                   |           | 1374.28 |
| Q13310-2;Q13310       | 2 PABP4_HUMAN Isoform 2 of Polyadenylate-binding protein 4 OS=Homo sapiens GN=PABPC4;>sp Q13310 PABP4_HUMAN Polyadeny                | 0         |         |
| Q13310;Q13310-2       | PABP4_HUMAN Polyadenylate-binding protein 4 OS=Homo sapiens GN=PABPC4 PE=1 SV=1;>sp Q13310-2 PABP4_HUMAN Isoform 2                   | 0         |         |
| Q13315                | ATM_HUMAN Serine-protein kinase ATM OS=Homo sapiens GN=ATM PE=1 SV=3                                                                 |           | 188.5   |
| Q13325                | IFIT5_HUMAN Interferon-induced protein with tetratricopeptide repeats 5 OS=Homo sapiens GN=IFIT5 PE=1 SV=1                           |           | 27.96   |
| Q13330                | MTA1_HUMAN Metastasis-associated protein MTA1 OS=Homo sapiens GN=MTA1 PE=1 SV=2                                                      |           |         |
| Q13330-2              | MTA1_HUMAN Isoform Short of Metastasis-associated protein MTA1 OS=Homo sapiens GN=MTA1                                               |           |         |
| Q13330;Q13330-2       | MTA1_HUMAN Metastasis-associated protein MTA1 OS=Homo sapiens GN=MTA1 PE=1 SV=2;>sp Q13330-2 MTA1_HUMAN Isoform St                   | 2.98E-17  |         |
| Q13332                | PTPRS_HUMAN Receptor-type tyrosine-protein phosphatase S OS=Homo sapiens GN=PTPRS PE=1 SV=3                                          |           |         |
| Q13332-2              | PTPRS_HUMAN Isoform PTPS-MEA of Receptor-type tyrosine-protein phosphatase S OS=Homo sapiens GN=PTPRS                                |           |         |
| Q13332-3              | PTPRS_HUMAN Isoform PTPS-MEB of Receptor-type tyrosine-protein phosphatase S OS=Homo sapiens GN=PTPRS                                |           |         |
| Q13332-4              | PTPRS_HUMAN Isoform PTPS-MEC of Receptor-type tyrosine-protein phosphatase S OS=Homo sapiens GN=PTPRS                                |           |         |
| Q13332-5              | PTPRS_HUMAN Isoform PTPS-F4-7 of Receptor-type tyrosine-protein phosphatase S OS=Homo sapiens GN=PTPRS                               |           |         |
| Q13332-6              | PTPRS_HUMAN Isoform 2 of Receptor-type tyrosine-protein phosphatase S OS=Homo sapiens GN=PTPRS                                       |           |         |
| Q13332-7              | PTPRS_HUMAN Isoform 3 of Receptor-type tyrosine-protein phosphatase S OS=Homo sapiens GN=PTPRS                                       |           |         |
| Q13342                | LY10_HUMAN Nuclear body protein SP140 OS=Homo sapiens GN=SP140 PE=2 SV=2                                                             |           | 0.25    |
| Q13342-3              | LY10_HUMAN Isoform Sp140 of Nuclear body protein SP140 OS=Homo sapiens GN=SP140                                                      |           | 0.25    |
| Q13347                | EIF3I_HUMAN Eukaryotic translation initiation factor 3 subunit I OS=Homo sapiens GN=EIF3I PE=1 SV=1                                  |           | 494.28  |
| Q13362                | 2A5G_HUMAN Serine/threonine-protein phosphatase 2A 56 kDa regulatory subunit gamma isoform OS=Homo sapiens GN=PPP2R5C PE=1 SV=3      |           | 25.65   |
| Q13362-2              | 2A5G_HUMAN Isoform Gamma-1 of Serine/threonine-protein phosphatase 2A 56 kDa regulatory subunit gamma isoform OS=Homo sapiens GN=PPP |           | 25.65   |
| Q13362-3              | 2A5G_HUMAN Isoform Gamma-2 of Serine/threonine-protein phosphatase 2A 56 kDa regulatory subunit gamma isoform OS=Homo sapiens GN=PPP |           | 25.65   |
| Q13362;Q13362-3;Q1336 | 2A5G_HUMAN Serine/threonine-protein phosphatase 2A 56 kDa regulatory subunit gamma isoform OS=Homo sapiens GN=PPP2R5C P              | 8.81E-84  |         |
| Q13363                | CTBP1_HUMAN C-terminal-binding protein 1 OS=Homo sapiens GN=CTBP1 PE=1 SV=2                                                          |           | 147.73  |
| Q13371;Q4VXB6;Q4VXB5  | PHLP_HUMAN Phosducin-like protein OS=Homo sapiens GN=PDCL PE=1 SV=3;>tr Q4VXB6 Q4VXB6_HUMAN Phosducin-like OS=Hom                    | 1.96E-07  |         |
| Q13395                | TARB1_HUMAN Probable methyltransferase TARB1 OS=Homo sapiens GN=TARB1 PE=1 SV=1                                                      |           |         |
| Q13404                | UB2V1_HUMAN Ubiquitin-conjugating enzyme E2 variant 1 OS=Homo sapiens GN=UBE2V1 PE=1 SV=2                                            |           | 206.5   |
| Q13404-1              | UB2V1_HUMAN Isoform 1 of Ubiquitin-conjugating enzyme E2 variant 1 OS=Homo sapiens GN=UBE2V1                                         |           | 206.5   |
| Q13404-1;Q13404-2;Q13 | 1 UB2V1_HUMAN Isoform 1 of Ubiquitin-conjugating enzyme E2 variant 1 OS=Homo sapiens GN=UBE2V1;>sp Q13404-2 UB2V1_HUM                | 1.70E-22  |         |
| Q13404-2              | UB2V1_HUMAN Isoform 2 of Ubiquitin-conjugating enzyme E2 variant 1 OS=Homo sapiens GN=UBE2V1                                         |           | 206.5   |
| Q13404-6              | UB2V1_HUMAN Isoform 4 of Ubiquitin-conjugating enzyme E2 variant 1 OS=Homo sapiens GN=UBE2V1                                         |           | 92.87   |
| Q13404-7              | UB2V1_HUMAN Isoform 5 of Ubiquitin-conjugating enzyme E2 variant 1 OS=Homo sapiens GN=UBE2V1                                         |           | 206.5   |
| Q13404;Q13404-1;Q1340 | UB2V1_HUMAN Ubiquitin-conjugating enzyme E2 variant 1 OS=Homo sapiens GN=UBE2V1 PE=1 SV=2;>sp Q13404-1 UB2V1_HUMAI                   | 7.63E-137 |         |
| Q13405                | RM49_HUMAN 39S ribosomal protein L49, mitochondrial OS=Homo sapiens GN=MRPL49 PE=1 SV=1                                              |           | 172.72  |
| Q13409                | DC1I2_HUMAN Cytoplasmic dynein 1 intermediate chain 2 OS=Homo sapiens GN=DYNC1I2 PE=1 SV=3                                           |           |         |
| Q13409-2              | DC1I2_HUMAN Isoform 2B of Cytoplasmic dynein 1 intermediate chain 2 OS=Homo sapiens GN=DYNC1I2                                       |           |         |
| Q13409-3              | DC1I2_HUMAN Isoform 2C of Cytoplasmic dynein 1 intermediate chain 2 OS=Homo sapiens GN=DYNC1I2                                       |           |         |
| Q13409-5              | DC1I2_HUMAN Isoform 2E of Cytoplasmic dynein 1 intermediate chain 2 OS=Homo sapiens GN=DYNC1I2                                       |           |         |
| Q13409-6              | DC1I2_HUMAN Isoform 2F of Cytoplasmic dynein 1 intermediate chain 2 OS=Homo sapiens GN=DYNC1I2                                       |           |         |
| Q13409;Q13409-5;Q1340 | DC1I2_HUMAN Cytoplasmic dynein 1 intermediate chain 2 OS=Homo sapiens GN=DYNC1I2 PE=1 SV=3;>sp Q13409-5 DC1I2_HUMAI                  | 8.68E-64  |         |

|                        |                                                                                                                            |            |          |
|------------------------|----------------------------------------------------------------------------------------------------------------------------|------------|----------|
| Q13416                 | ORC2_HUMAN Origin recognition complex subunit 2 OS=Homo sapiens GN=ORC2 PE=1 SV=2                                          |            | 42.81    |
| Q13418                 | ILK_HUMAN Integrin-linked protein kinase OS=Homo sapiens GN=ILK PE=1 SV=2                                                  |            | 181.89   |
| Q13422;Q13422-7;Q1342  | IKZF1_HUMAN DNA-binding protein Ikaros OS=Homo sapiens GN=IKZF1 PE=1 SV=1;>sp Q13422-7 IKZF1_HUMAN Isoform Ik7 of DN       | 1.33E-16   |          |
| Q13423                 | NNTM_HUMAN NAD(P) transhydrogenase, mitochondrial OS=Homo sapiens GN=NNT PE=1 SV=3                                         |            | 83.99    |
| Q13425                 | SNTB2_HUMAN Beta-2-syntrophin OS=Homo sapiens GN=SNTB2 PE=1 SV=1                                                           |            | 63.76    |
| Q13425-2               | SNTB2_HUMAN Isoform 2 of Beta-2-syntrophin OS=Homo sapiens GN=SNTB2                                                        |            | 60.37    |
| Q13426;Q13426-2;Q1342  | XRCC4_HUMAN DNA repair protein XRCC4 OS=Homo sapiens GN=XRCC4 PE=1 SV=2;>sp Q13426-2 XRCC4_HUMAN Isoform 2 of DN           | 1.68E-06   |          |
| Q13427                 | PPIG_HUMAN Peptidyl-prolyl cis-trans isomerase G OS=Homo sapiens GN=PPIG PE=1 SV=2                                         |            | 21.75    |
| Q13428                 | TCOF_HUMAN Treacle protein OS=Homo sapiens GN=TCOF1 PE=1 SV=3                                                              |            | 1022.86  |
| Q13428-2               | TCOF_HUMAN Isoform 2 of Treacle protein OS=Homo sapiens GN=TCOF1                                                           |            | 989.46   |
| Q13428-3               | TCOF_HUMAN Isoform 3 of Treacle protein OS=Homo sapiens GN=TCOF1                                                           |            | 1029.1   |
| Q13428-4               | TCOF_HUMAN Isoform 4 of Treacle protein OS=Homo sapiens GN=TCOF1                                                           |            | 1022.86  |
| Q13428-4;Q13428-3;Q134 | 4 TCOF_HUMAN Isoform 4 of Treacle protein OS=Homo sapiens GN=TCOF1;>sp Q13428-3 TCOF_HUMAN Isoform 3 of Treacle protein    | 2.31E-44   |          |
| Q13428-5               | TCOF_HUMAN Isoform 5 of Treacle protein OS=Homo sapiens GN=TCOF1                                                           |            | 551.65   |
| Q13428-6               | TCOF_HUMAN Isoform 6 of Treacle protein OS=Homo sapiens GN=TCOF1                                                           |            | 927.79   |
| Q13428-7               | TCOF_HUMAN Isoform 7 of Treacle protein OS=Homo sapiens GN=TCOF1                                                           |            | 934.03   |
| Q13428-8               | TCOF_HUMAN Isoform 8 of Treacle protein OS=Homo sapiens GN=TCOF1                                                           |            | 995.7    |
| Q13433;Q13433-2        | S39A6_HUMAN Zinc transporter ZIP6 OS=Homo sapiens GN=SLC39A6 PE=1 SV=3;>sp Q13433-2 S39A6_HUMAN Isoform 2 of Zinc tr       | 1.32E-31   |          |
| Q13435                 | SF3B2_HUMAN Splicing factor 3B subunit 2 OS=Homo sapiens GN=SF3B2 PE=1 SV=2                                                |            | 394.48   |
| Q13439                 | GOGA4_HUMAN Golgin subfamily A member 4 OS=Homo sapiens GN=GOLGA4 PE=1 SV=1                                                |            |          |
| Q13439-3               | GOGA4_HUMAN Isoform 3 of Golgin subfamily A member 4 OS=Homo sapiens GN=GOLGA4                                             |            |          |
| Q13439-4               | GOGA4_HUMAN Isoform 4 of Golgin subfamily A member 4 OS=Homo sapiens GN=GOLGA4                                             |            |          |
| Q13439;Q13439-4;Q1343  | 4 GOGA4_HUMAN Golgin subfamily A member 4 OS=Homo sapiens GN=GOLGA4 PE=1 SV=1;>sp Q13439-4 GOGA4_HUMAN Isoform 4           | 3.87E-40   |          |
| Q13442                 | HAP28_HUMAN 28 kDa heat- and acid-stable phosphoprotein OS=Homo sapiens GN=PDAP1 PE=1 SV=1                                 |            | 430.4    |
| Q13443                 | ADAM9_HUMAN Disintegrin and metalloproteinase domain-containing protein 9 OS=Homo sapiens GN=ADAM9 PE=1 SV=1               |            | 110.67   |
| Q13443-2               | ADAM9_HUMAN Isoform 2 of Disintegrin and metalloproteinase domain-containing protein 9 OS=Homo sapiens GN=ADAM9            |            | 75.02    |
| Q13443;C9J643;A0AVL1;C | 9 ADAM9_HUMAN Disintegrin and metalloproteinase domain-containing protein 9 OS=Homo sapiens GN=ADAM9 PE=1 SV=1;>tr C9J643  | 1.20E-10   |          |
| Q13445                 | TMED1_HUMAN Transmembrane emp24 domain-containing protein 1 OS=Homo sapiens GN=TMED1 PE=1 SV=1                             |            | 252.07   |
| Q13451                 | FKBP5_HUMAN Peptidyl-prolyl cis-trans isomerase FKBP5 OS=Homo sapiens GN=FKBP5 PE=1 SV=2                                   |            | 205.32   |
| Q13454;Q13454-2        | TUSC3_HUMAN Tumor suppressor candidate 3 OS=Homo sapiens GN=TUSC3 PE=2 SV=1;>sp Q13454-2 TUSC3_HUMAN Isoform 2 of          | 0.00014873 |          |
| Q13459;Q13459-2        | MYO9B_HUMAN Myosin-IXb OS=Homo sapiens GN=MYO9B PE=1 SV=3;>sp Q13459-2 MYO9B_HUMAN Isoform Short of Myosin-IXb C           | 6.99E-15   |          |
| Q13464                 | ROCK1_HUMAN Rho-associated protein kinase 1 OS=Homo sapiens GN=ROCK1 PE=1 SV=1                                             |            |          |
| Q13465                 | MDS1_HUMAN MDS1 and EVI1 complex locus protein MDS1 OS=Homo sapiens GN=MECOM PE=2 SV=1                                     |            |          |
| Q13472                 | TOP3A_HUMAN DNA topoisomerase 3-alpha OS=Homo sapiens GN=TOP3A PE=1 SV=1                                                   |            |          |
| Q13472-2               | TOP3A_HUMAN Isoform Short of DNA topoisomerase 3-alpha OS=Homo sapiens GN=TOP3A                                            |            |          |
| Q13492                 | PICAL_HUMAN Phosphatidylinositol-binding clathrin assembly protein OS=Homo sapiens GN=PICALM PE=1 SV=2                     |            | 522.33   |
| Q13492-2               | PICAL_HUMAN Isoform 2 of Phosphatidylinositol-binding clathrin assembly protein OS=Homo sapiens GN=PICALM                  |            | 522.33   |
| Q13492-3               | PICAL_HUMAN Isoform 3 of Phosphatidylinositol-binding clathrin assembly protein OS=Homo sapiens GN=PICALM                  |            | 522.33   |
| Q13492;Q13492-2;Q1349  | 2 PICAL_HUMAN Phosphatidylinositol-binding clathrin assembly protein OS=Homo sapiens GN=PICALM PE=1 SV=2;>sp Q13492-2 PICA | 8.67E-85   |          |
| Q13501                 | SQSTM1_HUMAN Sequestosome-1 OS=Homo sapiens GN=SQSTM1 PE=1 SV=1                                                            |            | 67.74    |
| Q13501-2               | SQSTM1_HUMAN Isoform 2 of Sequestosome-1 OS=Homo sapiens GN=SQSTM1                                                         |            | 67.74    |
| Q13501;Q13501-2        | 2 SQSTM1_HUMAN Sequestosome-1 OS=Homo sapiens GN=SQSTM1 PE=1 SV=1;>sp Q13501-2 SQSTM1_HUMAN Isoform 2 of Sequestos         | 1.51E-20   |          |
| Q13503                 | MED21_HUMAN Mediator of RNA polymerase II transcription subunit 21 OS=Homo sapiens GN=MED21 PE=1 SV=1                      |            | 8.82E-35 |
| Q13505                 | MTX1_HUMAN Metaxin-1 OS=Homo sapiens GN=MTX1 PE=1 SV=2                                                                     |            |          |
| Q13505-2               | MTX1_HUMAN Isoform 2 of Metaxin-1 OS=Homo sapiens GN=MTX1                                                                  |            |          |
| Q13505-3               | MTX1_HUMAN Isoform 3 of Metaxin-1 OS=Homo sapiens GN=MTX1                                                                  |            |          |
| Q13505;Q13505-2;Q1350  | 2 MTX1_HUMAN Metaxin-1 OS=Homo sapiens GN=MTX1 PE=1 SV=2;>sp Q13505-2 MTX1_HUMAN Isoform 2 of Metaxin-1 OS=Homo s          | 5.37E-09   |          |
| Q13507                 | TRPC3_HUMAN Short transient receptor potential channel 3 OS=Homo sapiens GN=TRPC3 PE=1 SV=3                                |            | 29.65    |
| Q13509                 | TBB3_HUMAN Tubulin beta-3 chain OS=Homo sapiens GN=TUBB3 PE=1 SV=2                                                         |            | 1440.15  |
| Q13510                 | ASAH1_HUMAN Acid ceramidase OS=Homo sapiens GN=ASAH1 PE=1 SV=5                                                             |            |          |
| Q13510-2               | ASAH1_HUMAN Isoform 2 of Acid ceramidase OS=Homo sapiens GN=ASAH1                                                          |            |          |
| Q13510-2;Q13510        | 2 ASAH1_HUMAN Isoform 2 of Acid ceramidase OS=Homo sapiens GN=ASAH1;>sp Q13510 ASAH1_HUMAN Acid ceramidase OS=Hon          | 9.89E-14   |          |
| Q13523                 | PRP4B_HUMAN Serine/threonine-protein kinase PRP4 homolog OS=Homo sapiens GN=PRPF4B PE=1 SV=3                               |            |          |
| Q13526                 | PIN1_HUMAN Peptidyl-prolyl cis-trans isomerase NIMA-interacting 1 OS=Homo sapiens GN=PIN1 PE=1 SV=1                        |            | 163.2    |
| Q13535                 | ATR_HUMAN Serine/threonine-protein kinase ATR OS=Homo sapiens GN=ATR PE=1 SV=3                                             |            |          |
| Q13535-2               | ATR_HUMAN Isoform 2 of Serine/threonine-protein kinase ATR OS=Homo sapiens GN=ATR                                          |            |          |
| Q13535-3               | ATR_HUMAN Isoform 3 of Serine/threonine-protein kinase ATR OS=Homo sapiens GN=ATR                                          |            |          |
| Q13546                 | RIPK1_HUMAN Receptor-interacting serine/threonine-protein kinase 1 OS=Homo sapiens GN=RIPK1 PE=1 SV=3                      |            | 2.30E-08 |
| Q13547                 | HDAC1_HUMAN Histone deacetylase 1 OS=Homo sapiens GN=HDAC1 PE=1 SV=1                                                       |            | 166.81   |
| Q13554-2               | KCC2B_HUMAN Isoform 1 of Calcium/calmodulin-dependent protein kinase type II subunit beta OS=Homo sapiens GN=CAMK2B        |            | 5.71     |
| Q13554-4               | KCC2B_HUMAN Isoform 3 of Calcium/calmodulin-dependent protein kinase type II subunit beta OS=Homo sapiens GN=CAMK2B        |            | 5.71     |



|                             |                                                                                                                             |           |        |
|-----------------------------|-----------------------------------------------------------------------------------------------------------------------------|-----------|--------|
| Q13554-5                    | KCC2B_HUMAN Isoform 5 of Calcium/calmodulin-dependent protein kinase type II subunit beta OS=Homo sapiens GN=CAMK2B         |           | 5.71   |
| Q13554-6                    | KCC2B_HUMAN Isoform 6 of Calcium/calmodulin-dependent protein kinase type II subunit beta OS=Homo sapiens GN=CAMK2B         |           | 5.71   |
| Q13554-7                    | KCC2B_HUMAN Isoform 7 of Calcium/calmodulin-dependent protein kinase type II subunit beta OS=Homo sapiens GN=CAMK2B         |           | 5.71   |
| Q13554-8                    | KCC2B_HUMAN Isoform 8 of Calcium/calmodulin-dependent protein kinase type II subunit beta OS=Homo sapiens GN=CAMK2B         |           | 5.71   |
| Q13555                      | KCC2G_HUMAN Calcium/calmodulin-dependent protein kinase type II subunit gamma OS=Homo sapiens GN=CAMK2G PE=1 SV=3           |           | 5.71   |
| Q13555-2                    | KCC2G_HUMAN Isoform 2 of Calcium/calmodulin-dependent protein kinase type II subunit gamma OS=Homo sapiens GN=CAMK2G        |           | 5.71   |
| Q13555-3                    | KCC2G_HUMAN Isoform 3 of Calcium/calmodulin-dependent protein kinase type II subunit gamma OS=Homo sapiens GN=CAMK2G        |           | 5.71   |
| Q13555-4                    | KCC2G_HUMAN Isoform 4 of Calcium/calmodulin-dependent protein kinase type II subunit gamma OS=Homo sapiens GN=CAMK2G        |           | 5.71   |
| Q13555-5                    | KCC2G_HUMAN Isoform 5 of Calcium/calmodulin-dependent protein kinase type II subunit gamma OS=Homo sapiens GN=CAMK2G        |           | 5.71   |
| Q13555-6                    | KCC2G_HUMAN Isoform 6 of Calcium/calmodulin-dependent protein kinase type II subunit gamma OS=Homo sapiens GN=CAMK2G        |           | 5.71   |
| Q13555-6;Q13555;Q13556      | KCC2G_HUMAN Isoform 6 of Calcium/calmodulin-dependent protein kinase type II subunit gamma OS=Homo sapiens GN=CAMK2G;       | 6.67E-22  |        |
| Q13555-7                    | KCC2G_HUMAN Isoform 7 of Calcium/calmodulin-dependent protein kinase type II subunit gamma OS=Homo sapiens GN=CAMK2G        |           | 5.71   |
| Q13555-8                    | KCC2G_HUMAN Isoform 8 of Calcium/calmodulin-dependent protein kinase type II subunit gamma OS=Homo sapiens GN=CAMK2G        |           | 5.71   |
| Q13555-9                    | KCC2G_HUMAN Isoform 9 of Calcium/calmodulin-dependent protein kinase type II subunit gamma OS=Homo sapiens GN=CAMK2G        |           | 5.71   |
| Q13557                      | KCC2D_HUMAN Calcium/calmodulin-dependent protein kinase type II subunit delta OS=Homo sapiens GN=CAMK2D PE=1 SV=3           |           | 51.28  |
| Q13557-10                   | KCC2D_HUMAN Isoform Delta 10 of Calcium/calmodulin-dependent protein kinase type II subunit delta OS=Homo sapiens GN=CAMK2D |           | 51.28  |
| Q13557-11                   | KCC2D_HUMAN Isoform Delta 11 of Calcium/calmodulin-dependent protein kinase type II subunit delta OS=Homo sapiens GN=CAMK2D |           | 51.28  |
| Q13557-11;Q13557-4;Q13557-5 | KCC2D_HUMAN Isoform Delta 11 of Calcium/calmodulin-dependent protein kinase type II subunit delta OS=Homo sapiens GN=CAMK2D | 6.25E-137 |        |
| Q13557-3                    | KCC2D_HUMAN Isoform Delta 3 of Calcium/calmodulin-dependent protein kinase type II subunit delta OS=Homo sapiens GN=CAMK2D  |           | 51.28  |
| Q13557-4                    | KCC2D_HUMAN Isoform Delta 4 of Calcium/calmodulin-dependent protein kinase type II subunit delta OS=Homo sapiens GN=CAMK2D  |           | 51.28  |
| Q13557-5                    | KCC2D_HUMAN Isoform Delta 8 of Calcium/calmodulin-dependent protein kinase type II subunit delta OS=Homo sapiens GN=CAMK2D  |           | 51.28  |
| Q13557-6                    | KCC2D_HUMAN Isoform Delta 9 of Calcium/calmodulin-dependent protein kinase type II subunit delta OS=Homo sapiens GN=CAMK2D  |           | 51.28  |
| Q13557-8                    | KCC2D_HUMAN Isoform Delta 6 of Calcium/calmodulin-dependent protein kinase type II subunit delta OS=Homo sapiens GN=CAMK2D  |           | 51.28  |
| Q13557-9                    | KCC2D_HUMAN Isoform Delta 7 of Calcium/calmodulin-dependent protein kinase type II subunit delta OS=Homo sapiens GN=CAMK2D  |           | 51.28  |
| Q13561                      | DCTN2_HUMAN Dynactin subunit 2 OS=Homo sapiens GN=DCTN2 PE=1 SV=4                                                           |           | 99.53  |
| Q13561-2                    | DCTN2_HUMAN Isoform 2 of Dynactin subunit 2 OS=Homo sapiens GN=DCTN2                                                        |           | 99.53  |
| Q13561-2;Q13561-3;Q13561-4  | DCTN2_HUMAN Isoform 2 of Dynactin subunit 2 OS=Homo sapiens GN=DCTN2;                                                       | 6.05E-53  |        |
| Q13561-3                    | DCTN2_HUMAN Isoform 3 of Dynactin subunit 2 OS=Homo sapiens GN=DCTN2                                                        |           | 99.53  |
| Q13564                      | ULA1_HUMAN NEDD8-activating enzyme E1 regulatory subunit OS=Homo sapiens GN=NAE1 PE=1 SV=1                                  | 1.42E-25  |        |
| Q13573                      | SNW1_HUMAN SNW domain-containing protein 1 OS=Homo sapiens GN=SNW1 PE=1 SV=1                                                |           |        |
| Q13576                      | IQGA2_HUMAN Ras GTPase-activating-like protein IQGAP2 OS=Homo sapiens GN=IQGAP2 PE=1 SV=4                                   |           | 172.66 |
| Q13576-2                    | IQGA2_HUMAN Isoform 2 of Ras GTPase-activating-like protein IQGAP2 OS=Homo sapiens GN=IQGAP2                                |           | 133.17 |
| Q13576;B7Z7U6;D6R939        | IQGA2_HUMAN Ras GTPase-activating-like protein IQGAP2 OS=Homo sapiens GN=IQGAP2 PE=1 SV=4;                                  | 2.00E-73  |        |
| Q13586                      | STIM1_HUMAN Stromal interaction molecule 1 OS=Homo sapiens GN=STIM1 PE=1 SV=3                                               |           | 51.16  |
| Q13591                      | SEMA5A_HUMAN Semaphorin-5A OS=Homo sapiens GN=SEMA5A PE=1 SV=3                                                              |           |        |
| Q13595                      | TRA2A_HUMAN Transformer-2 protein homolog alpha OS=Homo sapiens GN=TRA2A PE=1 SV=1                                          |           |        |
| Q13595-2                    | TRA2A_HUMAN Short of Transformer-2 protein homolog alpha OS=Homo sapiens GN=TRA2A                                           |           |        |
| Q13595;Q13595-2             | TRA2A_HUMAN Transformer-2 protein homolog alpha OS=Homo sapiens GN=TRA2A PE=1 SV=1;                                         | 5.58E-24  |        |
| Q13596;Q13596-2             | SNX1_HUMAN Sorting nexin-1 OS=Homo sapiens GN=SNX1 PE=1 SV=3;                                                               | 2.83E-13  |        |
| Q13601                      | KRR1_HUMAN KRR1 small subunit processome component homolog OS=Homo sapiens GN=KRR1 PE=1 SV=4                                |           | 33.18  |
| Q13608                      | PEX6_HUMAN Peroxisome assembly factor 2 OS=Homo sapiens GN=PEX6 PE=1 SV=2                                                   |           |        |
| Q13610                      | PWP1_HUMAN Periodic tryptophan protein 1 homolog OS=Homo sapiens GN=PWP1 PE=1 SV=1                                          | 2.27E-05  |        |
| Q13614                      | MTMR2_HUMAN Myotubularin-related protein 2 OS=Homo sapiens GN=MTMR2 PE=1 SV=4                                               |           |        |
| Q13616                      | CUL1_HUMAN Cullin-1 OS=Homo sapiens GN=CUL1 PE=1 SV=2                                                                       |           | 82.43  |
| Q13617                      | CUL2_HUMAN Cullin-2 OS=Homo sapiens GN=CUL2 PE=1 SV=2                                                                       |           | 38.79  |
| Q13618                      | CUL3_HUMAN Cullin-3 OS=Homo sapiens GN=CUL3 PE=1 SV=2                                                                       |           | 41.1   |
| Q13618-2                    | CUL3_HUMAN Isoform 2 of Cullin-3 OS=Homo sapiens GN=CUL3                                                                    |           | 41.1   |
| Q13618-3                    | CUL3_HUMAN Isoform 3 of Cullin-3 OS=Homo sapiens GN=CUL3                                                                    |           | 6.06   |
| Q13618;Q13618-2;Q13618-3    | CUL3_HUMAN Cullin-3 OS=Homo sapiens GN=CUL3 PE=1 SV=2;                                                                      | 1.11E-35  |        |
| Q13619                      | CUL4A_HUMAN Cullin-4A OS=Homo sapiens GN=CUL4A PE=1 SV=3                                                                    |           | 159.84 |
| Q13619-2                    | CUL4A_HUMAN Isoform 2 of Cullin-4A OS=Homo sapiens GN=CUL4A                                                                 |           | 159.84 |
| Q13619;A8MSH7;B2RBV7        | CUL4A_HUMAN Cullin-4A OS=Homo sapiens GN=CUL4A PE=1 SV=3;                                                                   | 8.22E-28  |        |
| Q13620                      | CUL4B_HUMAN Cullin-4B OS=Homo sapiens GN=CUL4B PE=1 SV=4                                                                    |           | 328.42 |
| Q13620-1                    | CUL4B_HUMAN Isoform 2 of Cullin-4B OS=Homo sapiens GN=CUL4B                                                                 |           | 328.42 |
| Q13620-3                    | CUL4B_HUMAN Isoform 3 of Cullin-4B OS=Homo sapiens GN=CUL4B                                                                 |           | 267.8  |
| Q13620;E0CX08;Q13620-1      | CUL4B_HUMAN Cullin-4B OS=Homo sapiens GN=CUL4B PE=1 SV=4;                                                                   | 7.91E-195 |        |
| Q13621                      | S12A1_HUMAN Solute carrier family 12 member 1 OS=Homo sapiens GN=SLC12A1 PE=1 SV=2                                          |           |        |
| Q13621-3                    | S12A1_HUMAN Isoform F of Solute carrier family 12 member 1 OS=Homo sapiens GN=SLC12A1                                       |           |        |
| Q13630                      | FCL_HUMAN GDP-L-fucose synthase OS=Homo sapiens GN=TSTA3 PE=1 SV=1                                                          | 2.20E-30  |        |
| Q13636                      | RAB31_HUMAN Ras-related protein Rab-31 OS=Homo sapiens GN=RAB31 PE=1 SV=1                                                   |           | 145.83 |
| Q13637                      | RAB32_HUMAN Ras-related protein Rab-32 OS=Homo sapiens GN=RAB32 PE=1 SV=3                                                   |           | 41.99  |



|                        |                                                                                                                        |           |         |
|------------------------|------------------------------------------------------------------------------------------------------------------------|-----------|---------|
| Q13641                 | TPBG_HUMAN Trophoblast glycoprotein OS=Homo sapiens GN=TPBG PE=1 SV=1                                                  |           | 88.02   |
| Q13642-1;Q13642;Q1364  | 1 FHL1_HUMAN Isoform 1 of Four and a half LIM domains protein 1 OS=Homo sapiens GN=FHL1;>sp Q13642 FHL1_HUMAN Four and | 1.36E-234 |         |
| Q13643                 | FHL3_HUMAN Four and a half LIM domains protein 3 OS=Homo sapiens GN=FHL3 PE=1 SV=4                                     | 4.51E-15  |         |
| Q13698                 | CAC1S_HUMAN Voltage-dependent L-type calcium channel subunit alpha-1S OS=Homo sapiens GN=CACNA1S PE=1 SV=4             |           |         |
| Q13724                 | MOGS_HUMAN Mannosyl-oligosaccharide glucosidase OS=Homo sapiens GN=MOGS PE=1 SV=5                                      |           | 326.87  |
| Q13733                 | AT1A4_HUMAN Sodium/potassium-transporting ATPase subunit alpha-4 OS=Homo sapiens GN=ATP1A4 PE=1 SV=3                   |           | 783.01  |
| Q13733-2               | AT1A4_HUMAN Isoform 2 of Sodium/potassium-transporting ATPase subunit alpha-4 OS=Homo sapiens GN=ATP1A4                |           |         |
| Q13740                 | CD166_HUMAN CD166 antigen OS=Homo sapiens GN=ALCAM PE=1 SV=2                                                           |           | 429.49  |
| Q13740-2               | CD166_HUMAN Isoform 2 of CD166 antigen OS=Homo sapiens GN=ALCAM                                                        |           | 429.49  |
| Q13740;B4DTU0;Q13740-  | CD166_HUMAN CD166 antigen OS=Homo sapiens GN=ALCAM PE=1 SV=2;>tr B4DTU0 B4DTU0_HUMAN cDNA FLJ59249, highly simil.      | 1.31E-145 |         |
| Q13748                 | TBA3C_HUMAN Tubulin alpha-3C/D chain OS=Homo sapiens GN=TUBA3C PE=1 SV=3                                               |           | 968.57  |
| Q13748-2               | TBA3C_HUMAN Isoform 2 of Tubulin alpha-3C/D chain OS=Homo sapiens GN=TUBA3C                                            |           | 854.87  |
| Q13751                 | LAMB3_HUMAN Laminin subunit beta-3 OS=Homo sapiens GN=LAMB3 PE=1 SV=1                                                  | 2.39E-15  |         |
| Q13753;Q13753-2        | LAMC2_HUMAN Laminin subunit gamma-2 OS=Homo sapiens GN=LAMC2 PE=1 SV=2;>sp Q13753-2 LAMC2_HUMAN Isoform Short o        | 1.42E-12  |         |
| Q13761                 | RUNX3_HUMAN Runt-related transcription factor 3 OS=Homo sapiens GN=RUNX3 PE=1 SV=2                                     |           |         |
| Q13761-2               | RUNX3_HUMAN Isoform 2 of Runt-related transcription factor 3 OS=Homo sapiens GN=RUNX3                                  |           |         |
| Q13765                 | NACA_HUMAN Nascent polypeptide-associated complex subunit alpha OS=Homo sapiens GN=NACA PE=1 SV=1                      |           | 624.48  |
| Q13769                 | THOC5_HUMAN THO complex subunit 5 homolog OS=Homo sapiens GN=THOC5 PE=1 SV=2                                           | 6.99E-08  |         |
| Q13772                 | NCOA4_HUMAN Nuclear receptor coactivator 4 OS=Homo sapiens GN=NCOA4 PE=1 SV=1                                          |           | 20.8    |
| Q13772-2               | NCOA4_HUMAN Isoform Beta of Nuclear receptor coactivator 4 OS=Homo sapiens GN=NCOA4                                    |           | 0.06    |
| Q13795                 | ARFRP_HUMAN ADP-ribosylation factor-related protein 1 OS=Homo sapiens GN=ARFRP1 PE=1 SV=1                              | 2.88E-07  |         |
| Q13813                 | SPTA2_HUMAN Spectrin alpha chain, brain OS=Homo sapiens GN=SPTAN1 PE=1 SV=3                                            |           | 6463.59 |
| Q13813-2               | SPTA2_HUMAN Isoform 2 of Spectrin alpha chain, brain OS=Homo sapiens GN=SPTAN1                                         |           | 6425.56 |
| Q13813-3               | SPTA2_HUMAN Isoform 3 of Spectrin alpha chain, brain OS=Homo sapiens GN=SPTAN1                                         |           | 6448.78 |
| Q13813;Q13813-2;Q1381  | SPTA2_HUMAN Spectrin alpha chain, brain OS=Homo sapiens GN=SPTAN1 PE=1 SV=3;>sp Q13813-2 SPTA2_HUMAN Isoform 2 of Sp   | 0         |         |
| Q13822                 | ENPP2_HUMAN Ectonucleotide pyrophosphatase/phosphodiesterase family member 2 OS=Homo sapiens GN=ENPP2 PE=1 SV=3        |           | 43.12   |
| Q13822-2               | ENPP2_HUMAN Isoform 2 of Ectonucleotide pyrophosphatase/phosphodiesterase family member 2 OS=Homo sapiens GN=ENPP2     |           | 43.12   |
| Q13822-3               | ENPP2_HUMAN Isoform 3 of Ectonucleotide pyrophosphatase/phosphodiesterase family member 2 OS=Homo sapiens GN=ENPP2     |           | 43.12   |
| Q13823                 | NOG2_HUMAN Nucleolar GTP-binding protein 2 OS=Homo sapiens GN=GNL2 PE=1 SV=1                                           |           |         |
| Q13835                 | PKP1_HUMAN Plakophilin-1 OS=Homo sapiens GN=PKP1 PE=1 SV=2                                                             |           |         |
| Q13835-2               | PKP1_HUMAN Isoform 1 of Plakophilin-1 OS=Homo sapiens GN=PKP1                                                          |           |         |
| Q13838                 | DX39B_HUMAN Spliceosome RNA helicase DDX39B OS=Homo sapiens GN=DDX39B PE=1 SV=1                                        |           | 534.61  |
| Q13838-2               | DX39B_HUMAN Isoform 2 of Spliceosome RNA helicase DDX39B OS=Homo sapiens GN=DDX39B                                     |           | 534.73  |
| Q13838-2;Q13838        | 2 DX39B_HUMAN Isoform 2 of Spliceosome RNA helicase DDX39B OS=Homo sapiens GN=DDX39B;>sp Q13838 DX39B_HUMAN Splic      | 0         |         |
| Q13838-2;Q13838;Q5STA  | 2 UAP56_HUMAN Isoform 2 of Spliceosome RNA helicase BAT1 OS=Homo sapiens GN=BAT1;>sp Q13838 UAP56_HUMAN Spliceosome    | 1.07E-207 |         |
| Q13867                 | BLMH_HUMAN Bleomycin hydrolase OS=Homo sapiens GN=BLMH PE=1 SV=1                                                       |           | 45.42   |
| Q13868                 | EXOS2_HUMAN Exosome complex component RRP4 OS=Homo sapiens GN=EXOSC2 PE=1 SV=2                                         |           | 333.96  |
| Q13868;A3KFL5;A3KFL2;E | EXOS2_HUMAN Exosome complex exonuclease RRP4 OS=Homo sapiens GN=EXOSC2 PE=1 SV=2;>tr A3KFL5 A3KFL5_HUMAN Exosor        | 6.31E-50  |         |
| Q13882                 | PTK6_HUMAN Protein-tyrosine kinase 6 OS=Homo sapiens GN=PTK6 PE=1 SV=1                                                 |           | 49.04   |
| Q13885                 | TBB2A_HUMAN Tubulin beta-2A chain OS=Homo sapiens GN=TUBB2A PE=1 SV=1                                                  |           | 2168.12 |
| Q13888                 | TF2H2_HUMAN General transcription factor IIH subunit 2 OS=Homo sapiens GN=GTF2H2 PE=1 SV=1                             |           | 36.59   |
| Q13889                 | TF2H3_HUMAN General transcription factor IIH subunit 3 OS=Homo sapiens GN=GTF2H3 PE=1 SV=2                             |           | 61.34   |
| Q13895                 | BYST_HUMAN Bystin OS=Homo sapiens GN=BYSL PE=1 SV=3                                                                    |           | 110.48  |
| Q13907-2;Q13907        | 2 IDI1_HUMAN Isoform 2 of Isopentenyl-diphosphate Delta-isomerase 1 OS=Homo sapiens GN=IDI1;>sp Q13907 IDI1_HUMAN Isop | 5.94E-58  |         |
| Q13938                 | CAYP1_HUMAN Calcyphosin OS=Homo sapiens GN=CAPS PE=1 SV=1                                                              | 1.90E-62  |         |
| Q13948                 | CASP_HUMAN Protein CASP OS=Homo sapiens GN=CUX1 PE=1 SV=2                                                              |           | 93.09   |
| Q13948-2               | CASP_HUMAN Isoform 8 of Protein CASP OS=Homo sapiens GN=CUX1                                                           |           | 93.09   |
| Q13948;Q13948-2;P3988  | CASP_HUMAN Protein CASP OS=Homo sapiens GN=CUX1 PE=1 SV=2;>sp Q13948-2 CASP_HUMAN Isoform 8 of Protein CASP OS=Hc      | 8.89E-11  |         |
| Q13950                 | RUNX2_HUMAN Runt-related transcription factor 2 OS=Homo sapiens GN=RUNX2 PE=1 SV=2                                     |           |         |
| Q13950-2               | RUNX2_HUMAN Isoform 2 of Runt-related transcription factor 2 OS=Homo sapiens GN=RUNX2                                  |           |         |
| Q13950-3               | RUNX2_HUMAN Isoform 3 of Runt-related transcription factor 2 OS=Homo sapiens GN=RUNX2                                  |           |         |
| Q13951                 | PEBB_HUMAN Core-binding factor subunit beta OS=Homo sapiens GN=CBFB PE=1 SV=2                                          |           | 313.88  |
| Q13951-2               | PEBB_HUMAN Isoform 2 of Core-binding factor subunit beta OS=Homo sapiens GN=CBFB                                       |           | 339.78  |
| Q13951;A8K719;Q13951-  | PEBB_HUMAN Core-binding factor subunit beta OS=Homo sapiens GN=CBFB PE=1 SV=2;>tr A8K719 A8K719_HUMAN cDNA FLJ7641:    | 3.86E-26  |         |
| Q13952                 | NFYC_HUMAN Nuclear transcription factor Y subunit gamma OS=Homo sapiens GN=NFYC PE=1 SV=3                              |           | 39.26   |
| Q13952-2               | NFYC_HUMAN Isoform 1 of Nuclear transcription factor Y subunit gamma OS=Homo sapiens GN=NFYC                           |           | 39.26   |
| Q13952-3               | NFYC_HUMAN Isoform 2 of Nuclear transcription factor Y subunit gamma OS=Homo sapiens GN=NFYC                           |           | 39.26   |
| Q13976                 | KGP1_HUMAN cGMP-dependent protein kinase 1 OS=Homo sapiens GN=PRKG1 PE=1 SV=3                                          |           | 30.71   |
| Q13976-2               | KGP1_HUMAN Isoform Beta of cGMP-dependent protein kinase 1 OS=Homo sapiens GN=PRKG1                                    |           | 25.19   |
| Q14004                 | CDK13_HUMAN Cyclin-dependent kinase 13 OS=Homo sapiens GN=CDK13 PE=1 SV=2                                              |           | 109.05  |
| Q14004-2               | CDK13_HUMAN Isoform 2 of Cyclin-dependent kinase 13 OS=Homo sapiens GN=CDK13                                           |           | 107.37  |

|                       |                                                                                                                         |           |        |
|-----------------------|-------------------------------------------------------------------------------------------------------------------------|-----------|--------|
| Q14004;Q14004-2;Q9NYV | CDK13_HUMAN Cyclin-dependent kinase 13 OS=Homo sapiens GN=CDK13 PE=1 SV=2;>sp Q14004-2 CDK13_HUMAN Isoform 2 of C       | 1.43E-13  |        |
| Q14005;Q14005-2;B7WNI | IL16_HUMAN Pro-interleukin-16 OS=Homo sapiens GN=IL16 PE=1 SV=4;>sp Q14005-2 IL16_HUMAN Isoform 2 of Pro-interleukin-16 | 3.25E-22  |        |
| Q14008                | CKAP5_HUMAN Cytoskeleton-associated protein 5 OS=Homo sapiens GN=CKAP5 PE=1 SV=3                                        |           | 815.65 |
| Q14008-2              | CKAP5_HUMAN Isoform 2 of Cytoskeleton-associated protein 5 OS=Homo sapiens GN=CKAP5                                     |           | 809.43 |
| Q14008-3              | CKAP5_HUMAN Isoform 3 of Cytoskeleton-associated protein 5 OS=Homo sapiens GN=CKAP5                                     |           | 815.65 |
| Q14008-3;Q14008;Q1400 | 3 CKAP5_HUMAN Isoform 3 of Cytoskeleton-associated protein 5 OS=Homo sapiens GN=CKAP5;>sp Q14008 CKAP5_HUMAN Cytoske    | 7.80E-97  |        |
| Q14011                | CIRBP_HUMAN Cold-inducible RNA-binding protein OS=Homo sapiens GN=CIRBP PE=1 SV=1                                       |           | 350.39 |
| Q14012                | KCC1A_HUMAN Calcium/calmodulin-dependent protein kinase type 1 OS=Homo sapiens GN=CAMK1 PE=1 SV=1                       | 3.44E-09  |        |
| Q14019                | COTL1_HUMAN Coactosin-like protein OS=Homo sapiens GN=COTL1 PE=1 SV=3                                                   |           | 193.13 |
| Q14028                | CNGB1_HUMAN Cyclic nucleotide-gated cation channel beta-1 OS=Homo sapiens GN=CNGB1 PE=1 SV=2                            |           | 53.62  |
| Q14028-2              | CNGB1_HUMAN Isoform RCNC2A of Cyclic nucleotide-gated cation channel beta-1 OS=Homo sapiens GN=CNGB1                    |           | 51.28  |
| Q14061                | COX17_HUMAN Cytochrome c oxidase copper chaperone OS=Homo sapiens GN=COX17 PE=1 SV=2                                    |           | 57.41  |
| Q14088                | RB33A_HUMAN Ras-related protein Rab-33A OS=Homo sapiens GN=RAB33A PE=1 SV=2                                             |           | 3.92   |
| Q14103                | HNRNP_D_HUMAN Heterogeneous nuclear ribonucleoprotein D0 OS=Homo sapiens GN=HNRNP_D PE=1 SV=1                           |           | 734.86 |
| Q14103-2              | HNRNP_D_HUMAN Isoform 2 of Heterogeneous nuclear ribonucleoprotein D0 OS=Homo sapiens GN=HNRNP_D                        |           | 592.3  |
| Q14103-2;Q14103-4     | 2 HNRNP_D_HUMAN Isoform 2 of Heterogeneous nuclear ribonucleoprotein D0 OS=Homo sapiens GN=HNRNP_D;>sp Q14103-4 HNRNP_D | 0         |        |
| Q14103-3              | HNRNP_D_HUMAN Isoform 3 of Heterogeneous nuclear ribonucleoprotein D0 OS=Homo sapiens GN=HNRNP_D                        |           | 734.86 |
| Q14103-4              | HNRNP_D_HUMAN Isoform 4 of Heterogeneous nuclear ribonucleoprotein D0 OS=Homo sapiens GN=HNRNP_D                        |           | 592.3  |
| Q14103-4;B9ZVU1;Q1410 | 4 HNRNP_D_HUMAN Isoform 4 of Heterogeneous nuclear ribonucleoprotein D0 OS=Homo sapiens GN=HNRNP_D;>tr B9ZVU1 B9ZVU1_HU | 1.27E-206 |        |
| Q14103;Q14103-2;Q1410 | HNRNP_D_HUMAN Heterogeneous nuclear ribonucleoprotein D0 OS=Homo sapiens GN=HNRNP_D PE=1 SV=1;>sp Q14103-2 HNRNP_D_HU   | 9.45E-198 |        |
| Q14108                | SCRIB_HUMAN Protein scribble homolog OS=Homo sapiens GN=SCRIB PE=1 SV=4                                                 |           | 30.09  |
| Q14112;Q14112-2       | NID2_HUMAN Nidogen-2 OS=Homo sapiens GN=NID2 PE=1 SV=3;>sp Q14112-2 NID2_HUMAN Isoform 2 of Nidogen-2 OS=Homo sa        | 5.53E-133 |        |
| Q14116                | IL18_HUMAN Interleukin-18 OS=Homo sapiens GN=IL18 PE=1 SV=1                                                             | 1.02E-06  |        |
| Q14118                | DAG1_HUMAN Dystroglycan OS=Homo sapiens GN=DAG1 PE=1 SV=2                                                               |           | 139.98 |
| Q14119                | VEZF1_HUMAN Vascular endothelial zinc finger 1 OS=Homo sapiens GN=VEZF1 PE=1 SV=2                                       |           |        |
| Q14126                | DSG2_HUMAN Desmoglein-2 OS=Homo sapiens GN=DSG2 PE=1 SV=2                                                               | 4.17E-37  |        |
| Q14134;Q14134-2       | TRI29_HUMAN Tripartite motif-containing protein 29 OS=Homo sapiens GN=TRIM29 PE=1 SV=2;>sp Q14134-2 TRI29_HUMAN Isofor  | 4.02E-26  |        |
| Q14137                | BOP1_HUMAN Ribosome biogenesis protein BOP1 OS=Homo sapiens GN=BOP1 PE=1 SV=2                                           |           |        |
| Q14139                | UBE4A_HUMAN Ubiquitin conjugation factor E4 A OS=Homo sapiens GN=UBE4A PE=1 SV=2                                        |           |        |
| Q14139-2              | UBE4A_HUMAN Isoform 2 of Ubiquitin conjugation factor E4 A OS=Homo sapiens GN=UBE4A                                     |           |        |
| Q14139-2;Q14139       | 2 UBE4A_HUMAN Isoform 2 of Ubiquitin conjugation factor E4 A OS=Homo sapiens GN=UBE4A;>sp Q14139 UBE4A_HUMAN Ubiquitin  | 2.50E-12  |        |
| Q14141                | SEPT6_HUMAN Septin-6 OS=Homo sapiens GN=SEPT6 PE=1 SV=4                                                                 |           | 319.44 |
| Q14141-2              | SEPT6_HUMAN Isoform I of Septin-6 OS=Homo sapiens GN=SEPT6                                                              |           | 319.44 |
| Q14141-3              | SEPT6_HUMAN Isoform IV of Septin-6 OS=Homo sapiens GN=SEPT6                                                             |           | 162.53 |
| Q14141-4              | SEPT6_HUMAN Isoform V of Septin-6 OS=Homo sapiens GN=SEPT6                                                              |           | 319.44 |
| Q14141;Q14141-4;Q1414 | 4 SEPT6_HUMAN Septin-6 OS=Homo sapiens GN=SEPT6 PE=1 SV=4;>sp Q14141-4 SEPT6_HUMAN Isoform V of Septin-6 OS=Homo sa     | 0         |        |
| Q14145                | KEAP1_HUMAN Kelch-like ECH-associated protein 1 OS=Homo sapiens GN=KEAP1 PE=1 SV=2                                      |           |        |
| Q14146                | URB2_HUMAN Unhealthy ribosome biogenesis protein 2 homolog OS=Homo sapiens GN=URB2 PE=1 SV=2                            |           |        |
| Q14149;Q4VBZ9;A2RU29; | MORC3_HUMAN MORC family CW-type zinc finger protein 3 OS=Homo sapiens GN=MORC3 PE=1 SV=3;>tr Q4VBZ9 Q4VBZ9_HUMAN        | 5.74E-06  |        |
| Q14151                | SAFB2_HUMAN Scaffold attachment factor B2 OS=Homo sapiens GN=SAFB2 PE=1 SV=1                                            |           |        |
| Q14152                | EIF3A_HUMAN Eukaryotic translation initiation factor 3 subunit A OS=Homo sapiens GN=EIF3A PE=1 SV=1                     |           | 920.67 |
| Q14155;Q14155-3;Q1415 | 5 ARHG7_HUMAN Rho guanine nucleotide exchange factor 7 OS=Homo sapiens GN=ARHG7 PE=1 SV=2;>sp Q14155-3 ARHG7_HUM        | 2.14E-21  |        |
| Q14156                | EFR3A_HUMAN Protein EFR3 homolog A OS=Homo sapiens GN=EFR3A PE=1 SV=2                                                   |           | 28.89  |
| Q14156-2              | EFR3A_HUMAN Isoform 2 of Protein EFR3 homolog A OS=Homo sapiens GN=EFR3A                                                |           | 28.89  |
| Q14156-3              | EFR3A_HUMAN Isoform 3 of Protein EFR3 homolog A OS=Homo sapiens GN=EFR3A                                                |           | 28.89  |
| Q14157                | UBP2L_HUMAN Ubiquitin-associated protein 2-like OS=Homo sapiens GN=UBAP2L PE=1 SV=2                                     |           | 327.29 |
| Q14157-1              | UBP2L_HUMAN Isoform 1 of Ubiquitin-associated protein 2-like OS=Homo sapiens GN=UBAP2L                                  |           | 327.29 |
| Q14157-3              | UBP2L_HUMAN Isoform 3 of Ubiquitin-associated protein 2-like OS=Homo sapiens GN=UBAP2L                                  |           | 327.29 |
| Q14157-4              | UBP2L_HUMAN Isoform 4 of Ubiquitin-associated protein 2-like OS=Homo sapiens GN=UBAP2L                                  |           | 327.29 |
| Q14157;B4DYY5;Q14157- | 5 UBP2L_HUMAN Ubiquitin-associated protein 2-like OS=Homo sapiens GN=UBAP2L PE=1 SV=2;>tr B4DYY5 B4DYY5_HUMAN cDNA FLJ  | 1.06E-133 |        |
| Q14160                | SCRIB_HUMAN Protein scribble homolog OS=Homo sapiens GN=SCRIB PE=1 SV=4                                                 |           | 26.26  |
| Q14160-2              | SCRIB_HUMAN Isoform 2 of Protein scribble homolog OS=Homo sapiens GN=SCRIB                                              |           | 26.26  |
| Q14160-3              | SCRIB_HUMAN Isoform 3 of Protein scribble homolog OS=Homo sapiens GN=SCRIB                                              |           | 26.26  |
| Q14160-3;Q14160       | 3 SCRIB_HUMAN Isoform 3 of Protein scribble homolog OS=Homo sapiens GN=SCRIB;>sp Q14160 SCRIB_HUMAN Protein scribble hc | 1.08E-46  |        |
| Q14161                | GIT2_HUMAN ARF GTPase-activating protein GIT2 OS=Homo sapiens GN=GIT2 PE=1 SV=2                                         |           | 31.31  |
| Q14161-10             | GIT2_HUMAN Isoform 10 of ARF GTPase-activating protein GIT2 OS=Homo sapiens GN=GIT2                                     |           | 27.72  |
| Q14161-11             | GIT2_HUMAN Isoform 11 of ARF GTPase-activating protein GIT2 OS=Homo sapiens GN=GIT2                                     |           | 27.72  |
| Q14161-3              | GIT2_HUMAN Isoform 3 of ARF GTPase-activating protein GIT2 OS=Homo sapiens GN=GIT2                                      |           | 31.31  |
| Q14161-4              | GIT2_HUMAN Isoform 4 of ARF GTPase-activating protein GIT2 OS=Homo sapiens GN=GIT2                                      |           | 31.31  |
| Q14161-5              | GIT2_HUMAN Isoform 5 of ARF GTPase-activating protein GIT2 OS=Homo sapiens GN=GIT2                                      |           | 27.72  |
| Q14161-6              | GIT2_HUMAN Isoform 6 of ARF GTPase-activating protein GIT2 OS=Homo sapiens GN=GIT2                                      |           | 27.72  |

|                          |                                                                                                                        |           |         |
|--------------------------|------------------------------------------------------------------------------------------------------------------------|-----------|---------|
| Q14161-7                 | GIT2_HUMAN Isoform 7 of ARF GTPase-activating protein GIT2 OS=Homo sapiens GN=GIT2                                     |           | 27.72   |
| Q14161-8                 | GIT2_HUMAN Isoform 8 of ARF GTPase-activating protein GIT2 OS=Homo sapiens GN=GIT2                                     |           | 27.72   |
| Q14161-9                 | GIT2_HUMAN Isoform 9 of ARF GTPase-activating protein GIT2 OS=Homo sapiens GN=GIT2                                     |           | 27.72   |
| Q14165                   | MLEC_HUMAN Malectin OS=Homo sapiens GN=MLEC PE=1 SV=1                                                                  |           | 328.17  |
| Q14166                   | TTL12_HUMAN Tubulin--tyrosine ligase-like protein 12 OS=Homo sapiens GN=TTL12 PE=1 SV=2                                |           | 80.85   |
| Q14191                   | WRN_HUMAN Werner syndrome ATP-dependent helicase OS=Homo sapiens GN=WRN PE=1 SV=2                                      |           | 25.02   |
| Q14192                   | FHL2_HUMAN Four and a half LIM domains protein 2 OS=Homo sapiens GN=FHL2 PE=1 SV=3                                     | 1.29E-73  |         |
| Q14195                   | DPYL3_HUMAN Dihydropyrimidinase-related protein 3 OS=Homo sapiens GN=DPYSL3 PE=1 SV=1                                  | 0         |         |
| Q14197                   | ICT1_HUMAN Peptidyl-tRNA hydrolase ICT1, mitochondrial OS=Homo sapiens GN=ICT1 PE=1 SV=1                               |           | 109.1   |
| Q14202                   | ZMYM3_HUMAN Zinc finger MYM-type protein 3 OS=Homo sapiens GN=ZMYM3 PE=1 SV=2                                          |           |         |
| Q14202-2                 | ZMYM3_HUMAN Isoform 2 of Zinc finger MYM-type protein 3 OS=Homo sapiens GN=ZMYM3                                       |           |         |
| Q14203                   | DCTN1_HUMAN Dynactin subunit 1 OS=Homo sapiens GN=DCTN1 PE=1 SV=3                                                      |           |         |
| Q14203-2                 | DCTN1_HUMAN Isoform p135 of Dynactin subunit 1 OS=Homo sapiens GN=DCTN1                                                |           |         |
| Q14203;Q14203-2          | DCTN1_HUMAN Dynactin subunit 1 OS=Homo sapiens GN=DCTN1 PE=1 SV=3;>sp Q14203-2 DCTN1_HUMAN Isoform p135 of Dynac       | 3.79E-19  |         |
| Q14204                   | DYHC1_HUMAN Cytoplasmic dynein 1 heavy chain 1 OS=Homo sapiens GN=DYNC1H1 PE=1 SV=5                                    |           | 5322.31 |
| Q14232                   | EI2BA_HUMAN Translation initiation factor eIF-2B subunit alpha OS=Homo sapiens GN=EIF2B1 PE=1 SV=1                     |           | 188.52  |
| Q14240                   | IF4A2_HUMAN Eukaryotic initiation factor 4A-II OS=Homo sapiens GN=EIF4A2 PE=1 SV=2                                     |           | 744.4   |
| Q14240-2                 | IF4A2_HUMAN Isoform 2 of Eukaryotic initiation factor 4A-II OS=Homo sapiens GN=EIF4A2                                  |           | 744.4   |
| Q14240-2;D3DNU9;Q14240-2 | IF4A2_HUMAN Isoform 2 of Eukaryotic initiation factor 4A-II OS=Homo sapiens GN=EIF4A2;>tr D3DNU9 D3DNU9_HUMAN Eukaryo  | 1.58E-187 |         |
| Q14244;Q14244-2;Q14244   | MAP7_HUMAN Ensconsin OS=Homo sapiens GN=MAP7 PE=1 SV=1;>sp Q14244-2 MAP7_HUMAN Isoform 2 of Ensconsin OS=Homo sa       | 1.61E-12  |         |
| Q14247                   | SRC8_HUMAN Src substrate cortactin OS=Homo sapiens GN=CTTN PE=1 SV=2                                                   | 0         |         |
| Q14254                   | FLOT2_HUMAN Flotillin-2 OS=Homo sapiens GN=FLOT2 PE=1 SV=2                                                             |           | 326.25  |
| Q14257                   | RCN2_HUMAN Reticulocalbin-2 OS=Homo sapiens GN=RCN2 PE=1 SV=1                                                          |           |         |
| Q14258                   | TRIM25_HUMAN E3 ubiquitin/ISG15 ligase TRIM25 OS=Homo sapiens GN=TRIM25 PE=1 SV=2                                      |           | 704.42  |
| Q14314                   | FGL2_HUMAN Fibroblast growth factor 2 OS=Homo sapiens GN=FGL2 PE=1 SV=1                                                | 2.04E-05  |         |
| Q14315                   | FLNC_HUMAN Filamin-C OS=Homo sapiens GN=FLNC PE=1 SV=3                                                                 |           | 2605.79 |
| Q14315-2                 | FLNC_HUMAN Isoform 2 of Filamin-C OS=Homo sapiens GN=FLNC                                                              |           | 2605.79 |
| Q14315;Q14315-2          | FLNC_HUMAN Filamin-C OS=Homo sapiens GN=FLNC PE=1 SV=3;>sp Q14315-2 FLNC_HUMAN Isoform 2 of Filamin-C OS=Homo sap      | 0         |         |
| Q14318                   | FKBP8_HUMAN Peptidyl-prolyl cis-trans isomerase FKBP8 OS=Homo sapiens GN=FKBP8 PE=1 SV=2                               |           | 23.78   |
| Q14318-2                 | FKBP8_HUMAN Isoform 2 of Peptidyl-prolyl cis-trans isomerase FKBP8 OS=Homo sapiens GN=FKBP8                            |           | 23.78   |
| Q14318-2;Q14318          | 2 FKBP8_HUMAN Isoform 2 of Peptidyl-prolyl cis-trans isomerase FKBP8 OS=Homo sapiens GN=FKBP8;>sp Q14318 FKBP8_HUMAN P | 3.88E-127 |         |
| Q14320                   | FA50A_HUMAN Protein FAM50A OS=Homo sapiens GN=FAM50A PE=1 SV=2                                                         |           | 27.88   |
| Q14331                   | FRG1_HUMAN Protein FRG1 OS=Homo sapiens GN=FRG1 PE=1 SV=1                                                              |           | 70.74   |
| Q14332                   | FZD2_HUMAN Frizzled-2 OS=Homo sapiens GN=FZD2 PE=2 SV=1                                                                |           | 48.55   |
| Q14344                   | GNA13_HUMAN Guanine nucleotide-binding protein subunit alpha-13 OS=Homo sapiens GN=GNA13 PE=1 SV=2                     |           | 364.59  |
| Q14353                   | GAMT_HUMAN Guanidinoacetate N-methyltransferase OS=Homo sapiens GN=GAMT PE=1 SV=1                                      |           | 25.84   |
| Q14376                   | GALE_HUMAN UDP-glucose 4-epimerase OS=Homo sapiens GN=GALE PE=1 SV=2                                                   | 1.31E-44  |         |
| Q14435                   | GALT3_HUMAN Polypeptide N-acetylgalactosaminyltransferase 3 OS=Homo sapiens GN=GALNT3 PE=2 SV=2                        | 4.42E-07  |         |
| Q14439                   | GP176_HUMAN Probable G-protein coupled receptor 176 OS=Homo sapiens GN=GPR176 PE=2 SV=1                                |           |         |
| Q14444                   | CAPR1_HUMAN Caprin-1 OS=Homo sapiens GN=CAPRIN1 PE=1 SV=2                                                              |           | 341.9   |
| Q14444-2                 | CAPR1_HUMAN Isoform 2 of Caprin-1 OS=Homo sapiens GN=CAPRIN1                                                           |           | 341.9   |
| Q14444;Q14444-2          | CAPR1_HUMAN Caprin-1 OS=Homo sapiens GN=CAPRIN1 PE=1 SV=2;>sp Q14444-2 CAPR1_HUMAN Isoform 2 of Caprin-1 OS=Hom        | 5.26E-175 |         |
| Q14451                   | GRB7_HUMAN Growth factor receptor-bound protein 7 OS=Homo sapiens GN=GRB7 PE=1 SV=2                                    |           |         |
| Q14451-2                 | GRB7_HUMAN Isoform 2 of Growth factor receptor-bound protein 7 OS=Homo sapiens GN=GRB7                                 |           |         |
| Q14451-3;Q14451;Q14451   | 3 GRB7_HUMAN Isoform 3 of Growth factor receptor-bound protein 7 OS=Homo sapiens GN=GRB7;>sp Q14451 GRB7_HUMAN Growt   | 4.22E-33  |         |
| Q14457                   | BECN1_HUMAN Beclin-1 OS=Homo sapiens GN=BECN1 PE=1 SV=2                                                                |           | 34.86   |
| Q14498                   | RBM39_HUMAN RNA-binding protein 39 OS=Homo sapiens GN=RBM39 PE=1 SV=2                                                  |           | 161.24  |
| Q14498-2                 | RBM39_HUMAN Isoform 2 of RNA-binding protein 39 OS=Homo sapiens GN=RBM39                                               |           | 161.24  |
| Q14498;Q14498-2          | RBM39_HUMAN RNA-binding protein 39 OS=Homo sapiens GN=RBM39 PE=1 SV=2;>sp Q14498-2 RBM39_HUMAN Isoform 2 of RNA-       | 4.75E-72  |         |
| Q14508;Q14508-3;Q14508   | WFDC2_HUMAN WAP four-disulfide core domain protein 2 OS=Homo sapiens GN=WFDC2 PE=1 SV=2;>sp Q14508-3 WFDC2_HUMAN       | 3.35E-05  |         |
| Q14517                   | FAT1_HUMAN Protocadherin Fat 1 OS=Homo sapiens GN=FAT1 PE=1 SV=2                                                       |           |         |
| Q14520                   | HABP2_HUMAN Hyaluronan-binding protein 2 OS=Homo sapiens GN=HABP2 PE=1 SV=1                                            | 1.68E-05  |         |
| Q14525                   | KRT33B_HUMAN Keratin, type I cuticular Ha3-II OS=Homo sapiens GN=KRT33B PE=1 SV=3                                      |           | 73.45   |
| Q14527                   | HLTF_HUMAN Helicase-like transcription factor OS=Homo sapiens GN=HLTF PE=1 SV=2                                        |           | 49.45   |
| Q14527-2                 | HLTF_HUMAN Isoform 2 of Helicase-like transcription factor OS=Homo sapiens GN=HLTF                                     |           | 49.45   |
| Q14532                   | K1H2_HUMAN Keratin, type I cuticular Ha2 OS=Homo sapiens GN=KRT32 PE=1 SV=3                                            |           | 59.53   |
| Q14533                   | KRT81_HUMAN Keratin, type II cuticular Hb1 OS=Homo sapiens GN=KRT81 PE=1 SV=3                                          |           | 81.03   |
| Q14534                   | ERG1_HUMAN Squalene monooxygenase OS=Homo sapiens GN=SQLE PE=2 SV=3                                                    |           |         |
| Q14554                   | PDIA5_HUMAN Protein disulfide-isomerase A5 OS=Homo sapiens GN=PDIA5 PE=1 SV=1                                          | 9.32E-07  |         |
| Q14558                   | KPRA_HUMAN Phosphoribosyl pyrophosphate synthase-associated protein 1 OS=Homo sapiens GN=PRPSAP1 PE=1 SV=2             |           | 77.11   |
| Q14558-2                 | KPRA_HUMAN Isoform 2 of Phosphoribosyl pyrophosphate synthase-associated protein 1 OS=Homo sapiens GN=PRPSAP1          |           | 77.11   |

|                           |                                                                                                                                 |           |         |
|---------------------------|---------------------------------------------------------------------------------------------------------------------------------|-----------|---------|
| Q14558-2;Q14558           | 2 KPRA_HUMAN Isoform 2 of Phosphoribosyl pyrophosphate synthase-associated protein 1 OS=Homo sapiens GN=PRPSAP1;>sp Q14!        | 2.49E-20  |         |
| Q14562                    | DHX8_HUMAN ATP-dependent RNA helicase DHX8 OS=Homo sapiens GN=DHX8 PE=1 SV=1                                                    |           |         |
| Q14566                    | MCM6_HUMAN DNA replication licensing factor MCM6 OS=Homo sapiens GN=MCM6 PE=1 SV=1                                              |           | 430.87  |
| Q14568                    | HS902_HUMAN Putative heat shock protein HSP 90-alpha A2 OS=Homo sapiens GN=HSP90AA2 PE=1 SV=2                                   |           | 219.6   |
| Q14571                    | ITPR2_HUMAN Inositol 1,4,5-trisphosphate receptor type 2 OS=Homo sapiens GN=ITPR2 PE=1 SV=2                                     |           | 53.43   |
| Q14571-2                  | ITPR2_HUMAN Isoform Short of Inositol 1,4,5-trisphosphate receptor type 2 OS=Homo sapiens GN=ITPR2                              |           | 6.82    |
| Q14573                    | ITPR3_HUMAN Inositol 1,4,5-trisphosphate receptor type 3 OS=Homo sapiens GN=ITPR3 PE=1 SV=2                                     |           | 434.54  |
| Q14574                    | DSC3_HUMAN Desmocollin-3 OS=Homo sapiens GN=DSC3 PE=1 SV=3                                                                      |           |         |
| Q14574-2                  | DSC3_HUMAN Isoform 3B of Desmocollin-3 OS=Homo sapiens GN=DSC3                                                                  |           |         |
| Q14576-2                  | ELAV3_HUMAN Isoform 2 of ELAV-like protein 3 OS=Homo sapiens GN=ELAVL3                                                          |           |         |
| Q14588                    | ZN234_HUMAN Zinc finger protein 234 OS=Homo sapiens GN=ZNF234 PE=2 SV=3                                                         |           | 39.48   |
| Q14624                    | ITIH4_HUMAN Inter-alpha-trypsin inhibitor heavy chain H4 OS=Homo sapiens GN=ITIH4 PE=1 SV=4                                     |           | 74.38   |
| Q14624-2                  | ITIH4_HUMAN Isoform 2 of Inter-alpha-trypsin inhibitor heavy chain H4 OS=Homo sapiens GN=ITIH4                                  |           | 74.38   |
| Q14624-2;Q14624           | 2 ITIH4_HUMAN Isoform 2 of Inter-alpha-trypsin inhibitor heavy chain H4 OS=Homo sapiens GN=ITIH4;>sp Q14624 ITIH4_HUMAN I       | 3.33E-190 |         |
| Q14642                    | I5P1_HUMAN Type I inositol-1,4,5-trisphosphate 5-phosphatase OS=Homo sapiens GN=INPP5A PE=2 SV=1                                |           |         |
| Q14643                    | ITPR1_HUMAN Inositol 1,4,5-trisphosphate receptor type 1 OS=Homo sapiens GN=ITPR1 PE=1 SV=2                                     |           | 62.94   |
| Q14643-2                  | ITPR1_HUMAN Isoform 2 of Inositol 1,4,5-trisphosphate receptor type 1 OS=Homo sapiens GN=ITPR1                                  |           | 62.94   |
| Q14643-3                  | ITPR1_HUMAN Isoform 3 of Inositol 1,4,5-trisphosphate receptor type 1 OS=Homo sapiens GN=ITPR1                                  |           | 60.59   |
| Q14643-4                  | ITPR1_HUMAN Isoform 4 of Inositol 1,4,5-trisphosphate receptor type 1 OS=Homo sapiens GN=ITPR1                                  |           | 60.59   |
| Q14643-5                  | ITPR1_HUMAN Isoform 5 of Inositol 1,4,5-trisphosphate receptor type 1 OS=Homo sapiens GN=ITPR1                                  |           | 60.59   |
| Q14643-6                  | ITPR1_HUMAN Isoform 6 of Inositol 1,4,5-trisphosphate receptor type 1 OS=Homo sapiens GN=ITPR1                                  |           | 62.94   |
| Q14643-7                  | ITPR1_HUMAN Isoform 7 of Inositol 1,4,5-trisphosphate receptor type 1 OS=Homo sapiens GN=ITPR1                                  |           | 62.94   |
| Q14643-8                  | ITPR1_HUMAN Isoform 8 of Inositol 1,4,5-trisphosphate receptor type 1 OS=Homo sapiens GN=ITPR1                                  |           | 60.59   |
| Q14651                    | PLS1_HUMAN Plastin-1 OS=Homo sapiens GN=PLS1 PE=1 SV=2                                                                          |           | 31.74   |
| Q14653                    | IRF3_HUMAN Interferon regulatory factor 3 OS=Homo sapiens GN=IRF3 PE=1 SV=1                                                     | 3.85E-20  |         |
| Q14657                    | LAGE3_HUMAN L antigen family member 3 OS=Homo sapiens GN=LAGE3 PE=1 SV=2                                                        |           | 145.3   |
| Q14667                    | K0100_HUMAN UPF0378 protein KIAA0100 OS=Homo sapiens GN=KIAA0100 PE=1 SV=3                                                      |           |         |
| Q14667-2                  | K0100_HUMAN Isoform 2 of UPF0378 protein KIAA0100 OS=Homo sapiens GN=KIAA0100                                                   |           |         |
| Q14667-4                  | K0100_HUMAN Isoform 4 of UPF0378 protein KIAA0100 OS=Homo sapiens GN=KIAA0100                                                   |           |         |
| Q14669                    | TRIPC_HUMAN Probable E3 ubiquitin-protein ligase TRIP12 OS=Homo sapiens GN=TRIP12 PE=1 SV=1                                     |           | 154.14  |
| Q14671;Q14671-2           | PUM1_HUMAN Pumilio homolog 1 OS=Homo sapiens GN=PUM1 PE=1 SV=3;>sp Q14671-2 PUM1_HUMAN Isoform 2 of Pumilio homol               | 6.71E-23  |         |
| Q14676                    | MDC1_HUMAN Mediator of DNA damage checkpoint protein 1 OS=Homo sapiens GN=MDC1 PE=1 SV=3                                        |           | 352.35  |
| Q14676-2                  | MDC1_HUMAN Isoform 2 of Mediator of DNA damage checkpoint protein 1 OS=Homo sapiens GN=MDC1                                     |           | 352.35  |
| Q14676-3                  | MDC1_HUMAN Isoform 3 of Mediator of DNA damage checkpoint protein 1 OS=Homo sapiens GN=MDC1                                     |           | 336.08  |
| Q14676-4                  | MDC1_HUMAN Isoform 4 of Mediator of DNA damage checkpoint protein 1 OS=Homo sapiens GN=MDC1                                     |           | 283.13  |
| Q14677                    | EPN4_HUMAN Clathrin interactor 1 OS=Homo sapiens GN=CLINT1 PE=1 SV=1                                                            |           | 23.44   |
| Q14677-2                  | EPN4_HUMAN Isoform 2 of Clathrin interactor 1 OS=Homo sapiens GN=CLINT1                                                         |           | 23.44   |
| Q14677;Q14677-2           | EPN4_HUMAN Clathrin interactor 1 OS=Homo sapiens GN=CLINT1 PE=1 SV=1;>sp Q14677-2 EPN4_HUMAN Isoform 2 of Clathrin inte         | 1.36E-108 |         |
| Q14680                    | MELK_HUMAN Maternal embryonic leucine zipper kinase OS=Homo sapiens GN=MELK PE=1 SV=3                                           |           |         |
| Q14683                    | SMC1A_HUMAN Structural maintenance of chromosomes protein 1A OS=Homo sapiens GN=SMC1A PE=1 SV=2                                 |           | 333.95  |
| Q14684                    | RRP1B_HUMAN Ribosomal RNA processing protein 1 homolog B OS=Homo sapiens GN=RRP1B PE=1 SV=3                                     |           |         |
| Q14684-2                  | RRP1B_HUMAN Isoform 2 of Ribosomal RNA processing protein 1 homolog B OS=Homo sapiens GN=RRP1B                                  |           |         |
| Q14684;C9JHZ3;Q14684-     | RRP1B_HUMAN Ribosomal RNA processing protein 1 homolog B OS=Homo sapiens GN=RRP1B PE=1 SV=3;>tr C9JHZ3 C9JHZ3_HUM/              | 2.50E-10  |         |
| Q14690                    | RRP5_HUMAN Protein RRP5 homolog OS=Homo sapiens GN=PDCD11 PE=1 SV=3                                                             |           | 75.83   |
| Q14691                    | PSF1_HUMAN DNA replication complex GINS protein PSF1 OS=Homo sapiens GN=GINS1 PE=1 SV=1                                         | 2.59E-15  |         |
| Q14692                    | BMS1_HUMAN Ribosome biogenesis protein BMS1 homolog OS=Homo sapiens GN=BMS1 PE=1 SV=1                                           |           |         |
| Q14694                    | UBP10_HUMAN Ubiquitin carboxyl-terminal hydrolase 10 OS=Homo sapiens GN=USP10 PE=1 SV=2                                         |           |         |
| Q14694-2                  | UBP10_HUMAN Isoform 2 of Ubiquitin carboxyl-terminal hydrolase 10 OS=Homo sapiens GN=USP10                                      |           |         |
| Q14694-2;Q14694-3;Q14694- | 2 UBP10_HUMAN Isoform 2 of Ubiquitin carboxyl-terminal hydrolase 10 OS=Homo sapiens GN=USP10;>sp Q14694-3 UBP10_HUMAN           | 4.18E-65  |         |
| Q14694-3                  | UBP10_HUMAN Isoform 3 of Ubiquitin carboxyl-terminal hydrolase 10 OS=Homo sapiens GN=USP10                                      |           |         |
| Q14696                    | MESD_HUMAN LDLR chaperone MESD OS=Homo sapiens GN=MESDC2 PE=1 SV=2                                                              |           | 258.1   |
| Q14697                    | GANAB_HUMAN Neutral alpha-glucosidase AB OS=Homo sapiens GN=GANAB PE=1 SV=3                                                     |           | 2320.54 |
| Q14697-2                  | GANAB_HUMAN Isoform 2 of Neutral alpha-glucosidase AB OS=Homo sapiens GN=GANAB                                                  |           | 2274.96 |
| Q14697-2;Q14697           | 2 GANAB_HUMAN Isoform 2 of Neutral alpha-glucosidase AB OS=Homo sapiens GN=GANAB;>sp Q14697 GANAB_HUMAN Neutral alpl            | 0         |         |
| Q14697-3                  | GANAB_HUMAN Isoform 3 of Neutral alpha-glucosidase AB OS=Homo sapiens GN=GANAB                                                  |           | 43.34   |
| Q14697;Q14697-2           | GANAB_HUMAN Neutral alpha-glucosidase AB OS=Homo sapiens GN=GANAB PE=1 SV=3;>sp Q14697-2 GANAB_HUMAN Isoform 2 of               | 0         |         |
| Q14699                    | RFTN1_HUMAN Raftlin OS=Homo sapiens GN=RFTN1 PE=1 SV=4                                                                          |           | 93.84   |
| Q14722                    | KCAB1_HUMAN Voltage-gated potassium channel subunit beta-1 OS=Homo sapiens GN=KCAB1 PE=2 SV=1                                   |           |         |
| Q14722-3                  | KCAB1_HUMAN Isoform KvB1.2 of Voltage-gated potassium channel subunit beta-1 OS=Homo sapiens GN=KCAB1                           |           |         |
| Q14728                    | MFS10_HUMAN Major facilitator superfamily domain-containing protein 10 OS=Homo sapiens GN=MFS10 PE=2 SV=1                       |           | 43.01   |
| Q14738                    | 2A5D_HUMAN Serine/threonine-protein phosphatase 2A 56 kDa regulatory subunit delta isoform OS=Homo sapiens GN=PPP2R5D PE=1 SV=1 |           | 70.04   |

|                          |                                                                                                                                          |           |
|--------------------------|------------------------------------------------------------------------------------------------------------------------------------------|-----------|
| Q14738-2                 | 2A5D_HUMAN Isoform Delta-2 of Serine/threonine-protein phosphatase 2A 56 kDa regulatory subunit delta isoform OS=Homo sapiens GN=PPP2R5D | 70.04     |
| Q14738-3                 | 2A5D_HUMAN Isoform Delta-3 of Serine/threonine-protein phosphatase 2A 56 kDa regulatory subunit delta isoform OS=Homo sapiens GN=PPP2R5D | 70.04     |
| Q14738;Q14738-2;Q14739   | 2A5D_HUMAN Serine/threonine-protein phosphatase 2A 56 kDa regulatory subunit delta isoform OS=Homo sapiens GN=PPP2R5D PE=                | 1.63E-93  |
| Q14739                   | LBR_HUMAN Lamin-B receptor OS=Homo sapiens GN=LBR PE=1 SV=2                                                                              | 105.81    |
| Q14746                   | COG2_HUMAN Conserved oligomeric Golgi complex subunit 2 OS=Homo sapiens GN=COG2 PE=1 SV=1                                                | 5.86E-05  |
| Q14764                   | MVP_HUMAN Major vault protein OS=Homo sapiens GN=MVP PE=1 SV=4                                                                           | 611.54    |
| Q14767                   | LTBP2_HUMAN Latent-transforming growth factor beta-binding protein 2 OS=Homo sapiens GN=LTBP2 PE=1 SV=3                                  | 4.98E-104 |
| Q14789                   | GOLGB1_HUMAN Golgin subfamily B member 1 OS=Homo sapiens GN=GOLGB1 PE=1 SV=2                                                             | 148.47    |
| Q147U4                   | L37B2_HUMAN Putative LRRC37B-like protein 2 OS=Homo sapiens GN=LRRC37BP1 PE=5 SV=2                                                       |           |
| Q14802                   | FXYD3_HUMAN FXYD domain-containing ion transport regulator 3 OS=Homo sapiens GN=FXYD3 PE=2 SV=1                                          |           |
| Q14802-2                 | FXYD3_HUMAN Isoform 2 of FXYD domain-containing ion transport regulator 3 OS=Homo sapiens GN=FXYD3                                       |           |
| Q14802-2;Q14802          | 2 FXYD3_HUMAN Isoform 2 of FXYD domain-containing ion transport regulator 3 OS=Homo sapiens GN=FXYD3;>sp Q14802 FXYD3_I                  | 4.20E-05  |
| Q14807                   | KIF22_HUMAN Kinesin-like protein KIF22 OS=Homo sapiens GN=KIF22 PE=1 SV=5                                                                |           |
| Q14832                   | GRM3_HUMAN Metabotropic glutamate receptor 3 OS=Homo sapiens GN=GRM3 PE=2 SV=2                                                           |           |
| Q14839                   | CHD4_HUMAN Chromodomain-helicase-DNA-binding protein 4 OS=Homo sapiens GN=CHD4 PE=1 SV=2                                                 | 1602.57   |
| Q14839-2                 | CHD4_HUMAN Isoform 2 of Chromodomain-helicase-DNA-binding protein 4 OS=Homo sapiens GN=CHD4                                              | 1602.57   |
| Q14839-2;Q14839          | 2 CHD4_HUMAN Isoform 2 of Chromodomain-helicase-DNA-binding protein 4 OS=Homo sapiens GN=CHD4;>sp Q14839 CHD4_HUMA                       | 0         |
| Q14847                   | LASP1_HUMAN LIM and SH3 domain protein 1 OS=Homo sapiens GN=LASP1 PE=1 SV=2                                                              | 689.49    |
| Q14847-2                 | LASP1_HUMAN Isoform 2 of LIM and SH3 domain protein 1 OS=Homo sapiens GN=LASP1                                                           | 651.44    |
| Q14847;Q14847-2          | LASP1_HUMAN LIM and SH3 domain protein 1 OS=Homo sapiens GN=LASP1 PE=1 SV=2;>sp Q14847-2 LASP1_HUMAN Isoform 2 of                        | 2.93E-11  |
| Q14849                   | STAR3_HUMAN StAR-related lipid transfer protein 3 OS=Homo sapiens GN=STARD3 PE=1 SV=2                                                    |           |
| Q14914                   | PTGR1_HUMAN Prostaglandin reductase 1 OS=Homo sapiens GN=PTGR1 PE=1 SV=2                                                                 | 86.34     |
| Q14919                   | NC2A_HUMAN Dr1-associated corepressor OS=Homo sapiens GN=DRAP1 PE=1 SV=3                                                                 | 118.57    |
| Q14919-2                 | NC2A_HUMAN Isoform 2 of Dr1-associated corepressor OS=Homo sapiens GN=DRAP1                                                              | 118.57    |
| Q14919-2;Q14919          | 2 NC2A_HUMAN Isoform 2 of Dr1-associated corepressor OS=Homo sapiens GN=DRAP1;>sp Q14919 NC2A_HUMAN Dr1-associated c                     | 2.61E-23  |
| Q14938                   | NFIX_HUMAN Nuclear factor 1 X-type OS=Homo sapiens GN=NFIX PE=1 SV=2                                                                     | 26.6      |
| Q14938-2                 | NFIX_HUMAN Isoform 2 of Nuclear factor 1 X-type OS=Homo sapiens GN=NFIX                                                                  | 26.6      |
| Q14938-3                 | NFIX_HUMAN Isoform 3 of Nuclear factor 1 X-type OS=Homo sapiens GN=NFIX                                                                  | 26.6      |
| Q14938-4                 | NFIX_HUMAN Isoform 4 of Nuclear factor 1 X-type OS=Homo sapiens GN=NFIX                                                                  | 26.6      |
| Q14938-5                 | NFIX_HUMAN Isoform 5 of Nuclear factor 1 X-type OS=Homo sapiens GN=NFIX                                                                  | 26.6      |
| Q14943                   | KI3S1_HUMAN Killer cell immunoglobulin-like receptor 3DS1 OS=Homo sapiens GN=KIR3DS1 PE=2 SV=1                                           |           |
| Q14953                   | KI2S5_HUMAN Killer cell immunoglobulin-like receptor 2DS5 OS=Homo sapiens GN=KIR2DS5 PE=2 SV=1                                           |           |
| Q14954                   | KI2S1_HUMAN Killer cell immunoglobulin-like receptor 2DS1 OS=Homo sapiens GN=KIR2DS1 PE=2 SV=1                                           |           |
| Q14956;Q14956-2          | GPNMB_HUMAN Transmembrane glycoprotein NMB OS=Homo sapiens GN=GPNMB PE=1 SV=2;>sp Q14956-2 GPNMB_HUMAN Isoform                           | 2.06E-75  |
| Q14964                   | RB39A_HUMAN Ras-related protein Rab-39A OS=Homo sapiens GN=RAB39 PE=2 SV=2                                                               | 61.85     |
| Q14966                   | ZNF638_HUMAN Zinc finger protein 638 OS=Homo sapiens GN=ZNF638 PE=1 SV=2                                                                 | 60.64     |
| Q14966-2                 | ZNF638_HUMAN Isoform 2 of Zinc finger protein 638 OS=Homo sapiens GN=ZNF638                                                              | 1.6       |
| Q14966-3                 | ZNF638_HUMAN Isoform 3 of Zinc finger protein 638 OS=Homo sapiens GN=ZNF638                                                              | 40.19     |
| Q14966-4                 | ZNF638_HUMAN Isoform 4 of Zinc finger protein 638 OS=Homo sapiens GN=ZNF638                                                              | 5.69      |
| Q14966-5                 | ZNF638_HUMAN Isoform 5 of Zinc finger protein 638 OS=Homo sapiens GN=ZNF638                                                              | 59.08     |
| Q14966;Q14966-5          | ZNF638_HUMAN Zinc finger protein 638 OS=Homo sapiens GN=ZNF638 PE=1 SV=2;>sp Q14966-5 ZNF638_HUMAN Isoform 5 of Zinc f                   | 2.01E-13  |
| Q14974                   | IMB1_HUMAN Importin subunit beta-1 OS=Homo sapiens GN=KPNB1 PE=1 SV=2                                                                    | 754.68    |
| Q14978                   | NOLC1_HUMAN Nucleolar and coiled-body phosphoprotein 1 OS=Homo sapiens GN=NOLC1 PE=1 SV=2                                                | 235.45    |
| Q14978-2                 | NOLC1_HUMAN Isoform Beta of Nucleolar and coiled-body phosphoprotein 1 OS=Homo sapiens GN=NOLC1                                          | 242.82    |
| Q14978-2;B2RAU8;Q14978-3 | 2 NOLC1_HUMAN Isoform Beta of Nucleolar and coiled-body phosphoprotein 1 OS=Homo sapiens GN=NOLC1;>tr B2RAU8 B2RAU8_H                    | 3.77E-40  |
| Q14978-3                 | NOLC1_HUMAN Isoform 3 of Nucleolar and coiled-body phosphoprotein 1 OS=Homo sapiens GN=NOLC1                                             | 122.12    |
| Q14980                   | NUMA1_HUMAN Nuclear mitotic apparatus protein 1 OS=Homo sapiens GN=NUMA1 PE=1 SV=2                                                       | 925.1     |
| Q14980-2                 | NUMA1_HUMAN Isoform 2 of Nuclear mitotic apparatus protein 1 OS=Homo sapiens GN=NUMA1                                                    | 933.86    |
| Q14980-2;Q14980          | 2 NUMA1_HUMAN Isoform 2 of Nuclear mitotic apparatus protein 1 OS=Homo sapiens GN=NUMA1;>sp Q14980 NUMA1_HUMAN Nucl                      | 0         |
| Q14980;Q14980-2          | NUMA1_HUMAN Nuclear mitotic apparatus protein 1 OS=Homo sapiens GN=NUMA1 PE=1 SV=2;>sp Q14980-2 NUMA1_HUMAN Isofo                        | 0         |
| Q14994                   | NR1I3_HUMAN Nuclear receptor subfamily 1 group I member 3 OS=Homo sapiens GN=NR1I3 PE=1 SV=2                                             |           |
| Q14994-2                 | NR1I3_HUMAN Isoform 2 of Nuclear receptor subfamily 1 group I member 3 OS=Homo sapiens GN=NR1I3                                          |           |
| Q14995                   | NR1D2_HUMAN Nuclear receptor subfamily 1 group D member 2 OS=Homo sapiens GN=NR1D2 PE=1 SV=3                                             | 6.24E-05  |
| Q14997                   | PSME4_HUMAN Proteasome activator complex subunit 4 OS=Homo sapiens GN=PSME4 PE=1 SV=2                                                    | 2.42E-08  |
| Q149N8                   | SHPRH_HUMAN E3 ubiquitin-protein ligase SHPRH OS=Homo sapiens GN=SHPRH PE=1 SV=2                                                         | 32.18     |
| Q149N8-2                 | SHPRH_HUMAN Isoform 2 of E3 ubiquitin-protein ligase SHPRH OS=Homo sapiens GN=SHPRH                                                      | 13.71     |
| Q149N8-4                 | SHPRH_HUMAN Isoform 3 of E3 ubiquitin-protein ligase SHPRH OS=Homo sapiens GN=SHPRH                                                      | 31.58     |
| Q149N8-5                 | SHPRH_HUMAN Isoform 4 of E3 ubiquitin-protein ligase SHPRH OS=Homo sapiens GN=SHPRH                                                      | 0.96      |
| Q14BN4;Q14BN4-3;Q14BN4-4 | SLMAP_HUMAN Sarcolemmal membrane-associated protein OS=Homo sapiens GN=SLMAP PE=1 SV=1;>sp Q14BN4-3 SLMAP_HUMAN                          | 6.04E-30  |
| Q14C86-6;Q14C86;Q14C86-7 | GAPD1_HUMAN Isoform 6 of GTPase-activating protein and VPS9 domain-containing protein 1 OS=Homo sapiens GN=GAPVD1;>sp                    | 8.34E-13  |
| Q14C87                   | T132D_HUMAN Transmembrane protein 132D OS=Homo sapiens GN=TMEM132D PE=2 SV=1                                                             |           |



|                       |                                                                                                                                           |           |        |
|-----------------------|-------------------------------------------------------------------------------------------------------------------------------------------|-----------|--------|
| Q14CN4                | K2C72_HUMAN Keratin, type II cytoskeletal 72 OS=Homo sapiens GN=KRT72 PE=1 SV=2                                                           |           | 280.69 |
| Q14CN4-2              | K2C72_HUMAN Isoform 2 of Keratin, type II cytoskeletal 72 OS=Homo sapiens GN=KRT72                                                        |           | 280.69 |
| Q14CX7                | NAA25_HUMAN N-alpha-acetyltransferase 25, NatB auxiliary subunit OS=Homo sapiens GN=NAA25 PE=1 SV=1                                       |           | 57.11  |
| Q14CX7-2              | NAA25_HUMAN Isoform 2 of N-alpha-acetyltransferase 25, NatB auxiliary subunit OS=Homo sapiens GN=NAA25                                    |           | 57.11  |
| Q14CX7;Q14CX7-2       | NAA25_HUMAN N-alpha-acetyltransferase 25, NatB auxiliary subunit OS=Homo sapiens GN=NAA25 PE=1 SV=1;>sp Q14CX7-2 NAA2                     | 8.87E-12  |        |
| Q15003                | CND2_HUMAN Condensin complex subunit 2 OS=Homo sapiens GN=NCAPH PE=1 SV=3                                                                 | 1.76E-14  |        |
| Q15004                | PAF_HUMAN PCNA-associated factor OS=Homo sapiens GN=PAF PE=1 SV=1                                                                         |           |        |
| Q15005                | SPCS2_HUMAN Signal peptidase complex subunit 2 OS=Homo sapiens GN=SPCS2 PE=1 SV=3                                                         |           | 258.47 |
| Q15006                | TTC35_HUMAN Tetratricopeptide repeat protein 35 OS=Homo sapiens GN=TTC35 PE=1 SV=1                                                        |           | 215.2  |
| Q15007                | FL2D_HUMAN Pre-splicing regulator WTAP OS=Homo sapiens GN=WTAP PE=1 SV=2                                                                  |           |        |
| Q15007-2              | FL2D_HUMAN Isoform 2 of Pre-splicing regulator WTAP OS=Homo sapiens GN=WTAP                                                               |           |        |
| Q15007;Q15007-2       | FL2D_HUMAN Pre-mRNA-splicing regulator WTAP OS=Homo sapiens GN=WTAP PE=1 SV=2;>sp Q15007-2 FL2D_HUMAN Isoform 2 of                        | 2.64E-70  |        |
| Q15008                | PSMD6_HUMAN 26S proteasome non-ATPase regulatory subunit 6 OS=Homo sapiens GN=PSMD6 PE=1 SV=1                                             |           | 233.55 |
| Q15011                | HERP1_HUMAN Homocysteine-responsive endoplasmic reticulum-resident ubiquitin-like domain member 1 protein OS=Homo sapiens GN=HERPUD1 I    |           | 27.87  |
| Q15011-2              | HERP1_HUMAN Isoform 2 of Homocysteine-responsive endoplasmic reticulum-resident ubiquitin-like domain member 1 protein OS=Homo sapiens GN |           | 27.87  |
| Q15011-3              | HERP1_HUMAN Isoform 3 of Homocysteine-responsive endoplasmic reticulum-resident ubiquitin-like domain member 1 protein OS=Homo sapiens GN |           | 27.87  |
| Q15014                | MO4L2_HUMAN Mortality factor 4-like protein 2 OS=Homo sapiens GN=MORF4L2 PE=1 SV=1                                                        |           | 109.44 |
| Q15018                | F175B_HUMAN BRISC complex subunit Abro1 OS=Homo sapiens GN=FAM175B PE=1 SV=2                                                              | 2.58E-06  |        |
| Q15019                | SEPT2_HUMAN Septin-2 OS=Homo sapiens GN=SEPT2 PE=1 SV=1                                                                                   |           | 813.81 |
| Q15019-2              | SEPT2_HUMAN Isoform 2 of Septin-2 OS=Homo sapiens GN=SEPT2                                                                                |           | 832.4  |
| Q15019-2;Q15019       | 2 SEPT2_HUMAN Isoform 2 of Septin-2 OS=Homo sapiens GN=SEPT2;>sp Q15019 SEPT2_HUMAN Septin-2 OS=Homo sapiens GN=S                         | 5.15E-300 |        |
| Q15020                | SART3_HUMAN Squamous cell carcinoma antigen recognized by T-cells 3 OS=Homo sapiens GN=SART3 PE=1 SV=1                                    |           | 238.98 |
| Q15020-2              | SART3_HUMAN Isoform 2 of Squamous cell carcinoma antigen recognized by T-cells 3 OS=Homo sapiens GN=SART3                                 |           | 40.91  |
| Q15020;B7ZKM0;B4DYA2  | SART3_HUMAN Squamous cell carcinoma antigen recognized by T-cells 3 OS=Homo sapiens GN=SART3 PE=1 SV=1;>tr B7ZKM0 B7Z                     | 5.84E-79  |        |
| Q15021                | CND1_HUMAN Condensin complex subunit 1 OS=Homo sapiens GN=NCAPD2 PE=1 SV=3                                                                |           | 40.64  |
| Q15024                | EXOS7_HUMAN Exosome complex component RRP42 OS=Homo sapiens GN=EXOSC7 PE=1 SV=3                                                           |           | 35.52  |
| Q15024;B2RDZ9;B4DIU0  | EXOS7_HUMAN Exosome complex exonuclease RRP42 OS=Homo sapiens GN=EXOSC7 PE=1 SV=2;>tr B2RDZ9 B2RDZ9_HUMAN cDN                             | 2.25E-33  |        |
| Q15025                | TNIP1_HUMAN TNFAIP3-interacting protein 1 OS=Homo sapiens GN=TNIP1 PE=1 SV=2                                                              |           | 38.43  |
| Q15025-2              | TNIP1_HUMAN Isoform 2 of TNFAIP3-interacting protein 1 OS=Homo sapiens GN=TNIP1                                                           |           | 38.43  |
| Q15029                | U5S1_HUMAN 116 kDa U5 small nuclear ribonucleoprotein component OS=Homo sapiens GN=EFTUD2 PE=1 SV=1                                       |           | 696.9  |
| Q15031                | SYLM_HUMAN Probable leucyl-tRNA synthetase, mitochondrial OS=Homo sapiens GN=LARS2 PE=1 SV=2                                              | 1.65E-12  |        |
| Q15032                | R3HD1_HUMAN R3H domain-containing protein 1 OS=Homo sapiens GN=R3HDM1 PE=1 SV=3                                                           |           |        |
| Q15032-2              | R3HD1_HUMAN Isoform 2 of R3H domain-containing protein 1 OS=Homo sapiens GN=R3HDM1                                                        |           |        |
| Q15035                | TRAM2_HUMAN Translocating chain-associated membrane protein 2 OS=Homo sapiens GN=TRAM2 PE=1 SV=1                                          | 1.31E-05  |        |
| Q15040                | JOS1_HUMAN Josephin-1 OS=Homo sapiens GN=JOSD1 PE=1 SV=1                                                                                  |           |        |
| Q15041                | AR6P1_HUMAN ADP-ribosylation factor-like protein 6-interacting protein 1 OS=Homo sapiens GN=ARL6IP1 PE=1 SV=2                             |           | 50.78  |
| Q15042                | RB3GP_HUMAN Rab3 GTPase-activating protein catalytic subunit OS=Homo sapiens GN=RAB3GAP1 PE=1 SV=3                                        | 3.43E-10  |        |
| Q15046                | SYK_HUMAN Lysyl-tRNA synthetase OS=Homo sapiens GN=KARS PE=1 SV=3                                                                         |           | 718.18 |
| Q15046-2              | SYK_HUMAN Isoform Mitochondrial of Lysyl-tRNA synthetase OS=Homo sapiens GN=KARS                                                          |           | 711.72 |
| Q15046;D3DUK4;Q15046  | SYK_HUMAN Lysyl-tRNA synthetase OS=Homo sapiens GN=KARS PE=1 SV=3;>tr D3DUK4 D3DUK4_HUMAN Lysyl-tRNA synthetase O                         | 9.01E-265 |        |
| Q15050                | RRS1_HUMAN Ribosome biogenesis regulatory protein homolog OS=Homo sapiens GN=RRS1 PE=1 SV=2                                               |           |        |
| Q15052                | ARHG6_HUMAN Rho guanine nucleotide exchange factor 6 OS=Homo sapiens GN=ARHGEF6 PE=1 SV=2                                                 |           |        |
| Q15052-2              | ARHG6_HUMAN Isoform 2 of Rho guanine nucleotide exchange factor 6 OS=Homo sapiens GN=ARHGEF6                                              |           |        |
| Q15054                | DPOD3_HUMAN DNA polymerase delta subunit 3 OS=Homo sapiens GN=POLD3 PE=1 SV=2                                                             |           |        |
| Q15056                | IF4H_HUMAN Eukaryotic translation initiation factor 4H OS=Homo sapiens GN=EIF4H PE=1 SV=5                                                 |           | 299.06 |
| Q15056-2              | IF4H_HUMAN Isoform Short of Eukaryotic translation initiation factor 4H OS=Homo sapiens GN=EIF4H                                          |           | 299.06 |
| Q15056;Q15056-2       | IF4H_HUMAN Eukaryotic translation initiation factor 4H OS=Homo sapiens GN=EIF4H PE=1 SV=5;>sp Q15056-2 IF4H_HUMAN Isofor                  | 3.82E-129 |        |
| Q15057                | ACAP2_HUMAN Arf-GAP with coiled-coil, ANK repeat and PH domain-containing protein 2 OS=Homo sapiens GN=ACAP2 PE=1 SV=3                    | 4.31E-06  |        |
| Q15058                | KIF14_HUMAN Kinesin-like protein KIF14 OS=Homo sapiens GN=KIF14 PE=1 SV=1                                                                 | 5.66E-06  |        |
| Q15059                | BRD3_HUMAN Bromodomain-containing protein 3 OS=Homo sapiens GN=BRD3 PE=1 SV=1                                                             |           |        |
| Q15059-2              | BRD3_HUMAN Isoform 2 of Bromodomain-containing protein 3 OS=Homo sapiens GN=BRD3                                                          |           |        |
| Q15061                | WDR43_HUMAN WD repeat-containing protein 43 OS=Homo sapiens GN=WDR43 PE=1 SV=3                                                            |           | 21.1   |
| Q15063                | POSTN_HUMAN Periostin OS=Homo sapiens GN=POSTN PE=1 SV=2                                                                                  | 0         |        |
| Q15063-2              | 2 POSTN_HUMAN Isoform 2 of Periostin OS=Homo sapiens GN=POSTN                                                                             | 0         |        |
| Q15063-3              | 3 POSTN_HUMAN Isoform 3 of Periostin OS=Homo sapiens GN=POSTN                                                                             | 0         |        |
| Q15067;Q15067-2       | ACOX1_HUMAN Peroxisomal acyl-coenzyme A oxidase 1 OS=Homo sapiens GN=ACOX1 PE=1 SV=3;>sp Q15067-2 ACOX1_HUMAN Is                          | 8.90E-15  |        |
| Q15070                | OXA1L_HUMAN Mitochondrial inner membrane protein OXA1L OS=Homo sapiens GN=OXA1L PE=1 SV=3                                                 |           | 45.67  |
| Q15070-2              | OXA1L_HUMAN Isoform 2 of Mitochondrial inner membrane protein OXA1L OS=Homo sapiens GN=OXA1L                                              |           | 45.67  |
| Q15070-3              | OXA1L_HUMAN Isoform 3 of Mitochondrial inner membrane protein OXA1L OS=Homo sapiens GN=OXA1L                                              |           | 45.67  |
| Q15070;Q15070-2;Q1507 | OXA1L_HUMAN Mitochondrial inner membrane protein OXA1L OS=Homo sapiens GN=OXA1L PE=1 SV=3;>sp Q15070-2 OXA1L_HUM                          | 5.24E-10  |        |
| Q15075                | EEA1_HUMAN Early endosome antigen 1 OS=Homo sapiens GN=EEA1 PE=1 SV=2                                                                     |           | 437.89 |



|                        |                                                                                                                                        |           |          |
|------------------------|----------------------------------------------------------------------------------------------------------------------------------------|-----------|----------|
| Q15084                 | PDIA6_HUMAN Protein disulfide-isomerase A6 OS=Homo sapiens GN=PDIA6 PE=1 SV=1                                                          |           | 894.82   |
| Q15084-2               | PDIA6_HUMAN Isoform 2 of Protein disulfide-isomerase A6 OS=Homo sapiens GN=PDIA6                                                       |           | 894.82   |
| Q15084-2;B3KY95;B5MBV2 | PDIA6_HUMAN Isoform 2 of Protein disulfide-isomerase A6 OS=Homo sapiens GN=PDIA6;>tr B3KY95 B3KY95_HUMAN cDNA FLJ16                    | 0         |          |
| Q15102                 | PA1B3_HUMAN Platelet-activating factor acetylhydrolase IB subunit gamma OS=Homo sapiens GN=PAFAH1B3 PE=1 SV=1                          |           | 114.53   |
| Q15109                 | RAGE_HUMAN Advanced glycosylation end product-specific receptor OS=Homo sapiens GN=AGER PE=1 SV=1                                      |           |          |
| Q15109-2               | RAGE_HUMAN Isoform 2 of Advanced glycosylation end product-specific receptor OS=Homo sapiens GN=AGER                                   |           |          |
| Q15113                 | PCOC1_HUMAN Procollagen C-endopeptidase enhancer 1 OS=Homo sapiens GN=PCOLCE PE=1 SV=2                                                 | 8.93E-50  |          |
| Q15119                 | PDK2_HUMAN [Pyruvate dehydrogenase [lipoamide]] kinase isozyme 2, mitochondrial OS=Homo sapiens GN=PDK2 PE=1 SV=2                      |           |          |
| Q15121                 | PEA15_HUMAN Astrocytic phosphoprotein PEA-15 OS=Homo sapiens GN=PEA15 PE=1 SV=2                                                        |           | 243.78   |
| Q15124                 | PGM5_HUMAN Phosphoglucomutase-like protein 5 OS=Homo sapiens GN=PGM5 PE=1 SV=2                                                         |           |          |
| Q15124-2               | PGM5_HUMAN Isoform 2 of Phosphoglucomutase-like protein 5 OS=Homo sapiens GN=PGM5                                                      |           |          |
| Q15124;Q15124-2        | PGM5_HUMAN Phosphoglucomutase-like protein 5 OS=Homo sapiens GN=PGM5 PE=1 SV=2;>sp Q15124-2 PGM5_HUMAN Isoform 2                       | 4.85E-21  |          |
| Q15125                 | EBP_HUMAN 3-beta-hydroxysteroid-Delta(8),Delta(7)-isomerase OS=Homo sapiens GN=EBP PE=1 SV=3                                           |           | 53.13    |
| Q15126                 | PMVK_HUMAN Phosphomevalonate kinase OS=Homo sapiens GN=PMVK PE=1 SV=3                                                                  | 7.66E-18  |          |
| Q15139                 | KPCD1_HUMAN Serine/threonine-protein kinase D1 OS=Homo sapiens GN=PRKD1 PE=1 SV=2                                                      |           |          |
| Q15149                 | PLEC_HUMAN Plectin OS=Homo sapiens GN=PLEC PE=1 SV=3                                                                                   |           | 11556.57 |
| Q15149-2               | PLEC_HUMAN Isoform 2 of Plectin OS=Homo sapiens GN=PLEC                                                                                |           | 11519.68 |
| Q15149-3               | PLEC_HUMAN Isoform 3 of Plectin OS=Homo sapiens GN=PLEC                                                                                |           | 11588.01 |
| Q15149-4               | PLEC_HUMAN Isoform 4 of Plectin OS=Homo sapiens GN=PLEC                                                                                |           | 11633.37 |
| Q15149-5               | PLEC_HUMAN Isoform 5 of Plectin OS=Homo sapiens GN=PLEC                                                                                |           | 11519.68 |
| Q15149-6               | PLEC_HUMAN Isoform 6 of Plectin OS=Homo sapiens GN=PLEC                                                                                |           | 11519.68 |
| Q15149-7               | PLEC_HUMAN Isoform 7 of Plectin OS=Homo sapiens GN=PLEC                                                                                |           | 11519.68 |
| Q15149-8               | PLEC_HUMAN Isoform 8 of Plectin OS=Homo sapiens GN=PLEC                                                                                |           | 11519.68 |
| Q15149-9               | PLEC_HUMAN Isoform 9 of Plectin OS=Homo sapiens GN=PLEC                                                                                |           | 11519.68 |
| Q15149;Q15149-2;Q1514  | PLEC_HUMAN Plectin OS=Homo sapiens GN=PLEC PE=1 SV=3;>sp Q15149-2 PLEC_HUMAN Isoform 2 of Plectin OS=Homo sapiens G                    | 0         |          |
| Q15154;Q15154-2        | PCM1_HUMAN Pericentriolar material 1 protein OS=Homo sapiens GN=PCM1 PE=1 SV=4;>sp Q15154-2 PCM1_HUMAN Isoform 2 of P                  | 8.29E-20  |          |
| Q15155                 | NOMO1_HUMAN Nodal modulator 1 OS=Homo sapiens GN=NOMO1 PE=1 SV=5                                                                       |           | 204.65   |
| Q15165;Q15165-1;Q1516  | PON2_HUMAN Serum paraoxonase/arylesterase 2 OS=Homo sapiens GN=PON2 PE=1 SV=3;>sp Q15165-1 PON2_HUMAN Isoform 1 (                      | 8.64E-24  |          |
| Q15173                 | 2A5B_HUMAN Serine/threonine-protein phosphatase 2A 56 kDa regulatory subunit beta isoform OS=Homo sapiens GN=PPP2R5B PE=1 SV=1         |           |          |
| Q15173-2               | 2A5B_HUMAN Isoform Beta-2 of Serine/threonine-protein phosphatase 2A 56 kDa regulatory subunit beta isoform OS=Homo sapiens GN=PPP2R5B |           |          |
| Q15181                 | IPYR_HUMAN Inorganic pyrophosphatase OS=Homo sapiens GN=PPA1 PE=1 SV=2                                                                 |           | 138.66   |
| Q15185                 | TEBP_HUMAN Prostaglandin E synthase 3 OS=Homo sapiens GN=PTGES3 PE=1 SV=1                                                              |           | 191.08   |
| Q15208                 | STK38_HUMAN Serine/threonine-protein kinase 38 OS=Homo sapiens GN=STK38 PE=1 SV=1                                                      | 1.38E-18  |          |
| Q15233                 | NONO_HUMAN Non-POU domain-containing octamer-binding protein OS=Homo sapiens GN=NONO PE=1 SV=4                                         |           | 1092.91  |
| Q15257                 | PTPA_HUMAN Serine/threonine-protein phosphatase 2A activator OS=Homo sapiens GN=PPP2R4 PE=1 SV=3                                       |           | 89.83    |
| Q15257-2               | PTPA_HUMAN Isoform 1 of Serine/threonine-protein phosphatase 2A activator OS=Homo sapiens GN=PPP2R4                                    |           | 89.83    |
| Q15257-3               | PTPA_HUMAN Isoform 3 of Serine/threonine-protein phosphatase 2A activator OS=Homo sapiens GN=PPP2R4                                    |           | 89.83    |
| Q15257-4               | PTPA_HUMAN Isoform 4 of Serine/threonine-protein phosphatase 2A activator OS=Homo sapiens GN=PPP2R4                                    |           | 11.27    |
| Q15257;A6PVN5;Q15257-  | PTPA_HUMAN Serine/threonine-protein phosphatase 2A activator OS=Homo sapiens GN=PPP2R4 PE=1 SV=3;>tr A6PVN5 A6PVN5_HU                  | 8.54E-40  |          |
| Q15269                 | PWP2_HUMAN Periodic tryptophan protein 2 homolog OS=Homo sapiens GN=PWP2 PE=1 SV=2                                                     |           |          |
| Q15274                 | NADC_HUMAN Nicotinate-nucleotide pyrophosphorylase [carboxylating] OS=Homo sapiens GN=QPRT PE=1 SV=3                                   | 2.63E-12  |          |
| Q15276                 | RABE1_HUMAN Rab GTPase-binding effector protein 1 OS=Homo sapiens GN=RABE1 PE=1 SV=2                                                   |           |          |
| Q15276-2               | RABE1_HUMAN Isoform 2 of Rab GTPase-binding effector protein 1 OS=Homo sapiens GN=RABE1                                                |           |          |
| Q15276;Q15276-2        | RABE1_HUMAN Rab GTPase-binding effector protein 1 OS=Homo sapiens GN=RABE1 PE=1 SV=2;>sp Q15276-2 RABE1_HUMAN Isof                     | 2.97E-18  |          |
| Q15286                 | RAB35_HUMAN Ras-related protein Rab-35 OS=Homo sapiens GN=RAB35 PE=1 SV=1                                                              |           | 441.18   |
| Q15287                 | RNPS1_HUMAN RNA-binding protein with serine-rich domain 1 OS=Homo sapiens GN=RNPS1 PE=1 SV=1                                           |           |          |
| Q15287-2               | RNPS1_HUMAN Isoform 2 of RNA-binding protein with serine-rich domain 1 OS=Homo sapiens GN=RNPS1                                        |           |          |
| Q15287-3               | RNPS1_HUMAN Isoform 3 of RNA-binding protein with serine-rich domain 1 OS=Homo sapiens GN=RNPS1                                        |           |          |
| Q15287;Q15287-2;Q1528  | RNPS1_HUMAN RNA-binding protein with serine-rich domain 1 OS=Homo sapiens GN=RNPS1 PE=1 SV=1;>sp Q15287-2 RNPS1_HUM                    | 1.90E-122 |          |
| Q15291                 | RBBP5_HUMAN Retinoblastoma-binding protein 5 OS=Homo sapiens GN=RBBP5 PE=1 SV=2                                                        |           | 38       |
| Q15291-2               | RBBP5_HUMAN Isoform 2 of Retinoblastoma-binding protein 5 OS=Homo sapiens GN=RBBP5                                                     |           | 38       |
| Q15291;Q15291-2        | RBBP5_HUMAN Retinoblastoma-binding protein 5 OS=Homo sapiens GN=RBBP5 PE=1 SV=2;>sp Q15291-2 RBBP5_HUMAN Isoform 2                     | 1.12E-09  |          |
| Q15293                 | RCN1_HUMAN Reticulocalbin-1 OS=Homo sapiens GN=RCN1 PE=1 SV=1                                                                          |           | 775.01   |
| Q15303                 | ERBB4_HUMAN Receptor tyrosine-protein kinase erbB-4 OS=Homo sapiens GN=ERBB4 PE=1 SV=1                                                 |           | 84.23    |
| Q15303-2               | ERBB4_HUMAN Isoform JM-B CYT-1 of Receptor tyrosine-protein kinase erbB-4 OS=Homo sapiens GN=ERBB4                                     |           | 84.23    |
| Q15303-3               | ERBB4_HUMAN Isoform JM-A CYT-2 of Receptor tyrosine-protein kinase erbB-4 OS=Homo sapiens GN=ERBB4                                     |           | 84.23    |
| Q15303-4               | ERBB4_HUMAN Isoform JM-B CYT-2 of Receptor tyrosine-protein kinase erbB-4 OS=Homo sapiens GN=ERBB4                                     |           | 84.23    |
| Q15306;Q15306-2        | IRF4_HUMAN Interferon regulatory factor 4 OS=Homo sapiens GN=IRF4 PE=1 SV=1;>sp Q15306-2 IRF4_HUMAN Isoform 2 of Interf                | 1.47E-16  |          |
| Q15323                 | K1H1_HUMAN Keratin, type I cuticular Ha1 OS=Homo sapiens GN=KRT31 PE=1 SV=3                                                            |           | 62.43    |
| Q15327                 | ANKR1_HUMAN Ankyrin repeat domain-containing protein 1 OS=Homo sapiens GN=ANKRD1 PE=1 SV=2                                             |           |          |
| Q15363                 | TMED2_HUMAN Transmembrane emp24 domain-containing protein 2 OS=Homo sapiens GN=TMED2 PE=1 SV=1                                         |           | 289.71   |

|                        |                                                                                                                         |           |        |
|------------------------|-------------------------------------------------------------------------------------------------------------------------|-----------|--------|
| Q15365                 | PCBP1_HUMAN Poly(rC)-binding protein 1 OS=Homo sapiens GN=PCBP1 PE=1 SV=2                                               |           | 325.69 |
| Q15366                 | PCBP2_HUMAN Poly(rC)-binding protein 2 OS=Homo sapiens GN=PCBP2 PE=1 SV=1                                               |           | 394.9  |
| Q15369                 | ELOC_HUMAN Transcription elongation factor B polypeptide 1 OS=Homo sapiens GN=TCEB1 PE=1 SV=1                           |           | 279.31 |
| Q15370                 | ELOB_HUMAN Transcription elongation factor B polypeptide 2 OS=Homo sapiens GN=TCEB2 PE=1 SV=1                           |           | 165.67 |
| Q15375                 | EPHA7_HUMAN Ephrin type-A receptor 7 OS=Homo sapiens GN=EPHA7 PE=1 SV=3                                                 |           | 89.59  |
| Q15375-2               | EPHA7_HUMAN Isoform 2 of Ephrin type-A receptor 7 OS=Homo sapiens GN=EPHA7                                              |           | 89.59  |
| Q15375;Q15375-2        | EPHA7_HUMAN Ephrin type-A receptor 7 OS=Homo sapiens GN=EPHA7 PE=1 SV=3;>sp Q15375-2 EPHA7_HUMAN Isoform 2 of Ephri     | 2.57E-09  |        |
| Q15382                 | RHEB_HUMAN GTP-binding protein Rheb OS=Homo sapiens GN=RHEB PE=1 SV=1                                                   |           | 188.06 |
| Q15386;B4DHJ9          | UBE3C_HUMAN Ubiquitin-protein ligase E3C OS=Homo sapiens GN=UBE3C PE=1 SV=3;>tr B4DHJ9 B4DHJ9_HUMAN cDNA FLJ61262,      | 4.83E-10  |        |
| Q15388                 | TOM20_HUMAN Mitochondrial import receptor subunit TOM20 homolog OS=Homo sapiens GN=TOMM20 PE=1 SV=1                     |           | 172.31 |
| Q15392                 | DHC24_HUMAN Delta(24)-sterol reductase OS=Homo sapiens GN=DHCR24 PE=1 SV=2                                              |           |        |
| Q15393                 | SF3B3_HUMAN Splicing factor 3B subunit 3 OS=Homo sapiens GN=Sf3b3 PE=1 SV=4                                             |           | 671.38 |
| Q15393-2               | SF3B3_HUMAN Isoform 2 of Splicing factor 3B subunit 3 OS=Homo sapiens GN=Sf3b3                                          |           | 128.18 |
| Q15393-3               | SF3B3_HUMAN Isoform 3 of Splicing factor 3B subunit 3 OS=Homo sapiens GN=Sf3b3                                          |           | 354.7  |
| Q15397                 | K0020_HUMAN Pumilio domain-containing protein KIAA0020 OS=Homo sapiens GN=KIAA0020 PE=1 SV=3                            |           | 93.34  |
| Q15398;Q15398-1        | DLGP5_HUMAN Disks large-associated protein 5 OS=Homo sapiens GN=DLGAP5 PE=1 SV=2;>sp Q15398-1 DLGP5_HUMAN Isoform 2     | 2.17E-69  |        |
| Q15404                 | RSU1_HUMAN Ras suppressor protein 1 OS=Homo sapiens GN=RSU1 PE=1 SV=3                                                   |           | 254.57 |
| Q15417                 | CNN3_HUMAN Calponin-3 OS=Homo sapiens GN=CNN3 PE=1 SV=1                                                                 |           | 553.62 |
| Q15418-2;Q15418;Q1541  | 2 KS6A1_HUMAN Isoform 2 of Ribosomal protein S6 kinase alpha-1 OS=Homo sapiens GN=RPS6KA1;>sp Q15418 KS6A1_HUMAN Rit    | 5.14E-66  |        |
| Q15424                 | SAFB1_HUMAN Scaffold attachment factor B1 OS=Homo sapiens GN=SAFB PE=1 SV=4                                             |           |        |
| Q15427                 | SF3B4_HUMAN Splicing factor 3B subunit 4 OS=Homo sapiens GN=Sf3b4 PE=1 SV=1                                             |           | 172.76 |
| Q15428                 | SF3A2_HUMAN Splicing factor 3A subunit 2 OS=Homo sapiens GN=Sf3a2 PE=1 SV=2                                             |           | 117.44 |
| Q15434                 | RBMS2_HUMAN RNA-binding motif, single-stranded-interacting protein 2 OS=Homo sapiens GN=RBMS2 PE=1 SV=1                 |           | 19.33  |
| Q15435                 | PPP1R7_HUMAN Protein phosphatase 1 regulatory subunit 7 OS=Homo sapiens GN=PPP1R7 PE=1 SV=1                             |           | 74.87  |
| Q15435-2               | PPP1R7_HUMAN Isoform 2 of Protein phosphatase 1 regulatory subunit 7 OS=Homo sapiens GN=PPP1R7                          |           | 74.87  |
| Q15435-3               | PPP1R7_HUMAN Isoform 3 of Protein phosphatase 1 regulatory subunit 7 OS=Homo sapiens GN=PPP1R7                          |           | 69.81  |
| Q15435-4               | PPP1R7_HUMAN Isoform 4 of Protein phosphatase 1 regulatory subunit 7 OS=Homo sapiens GN=PPP1R7                          |           | 69.81  |
| Q15435;Q15435-2;C9J17  | PPP1R7_HUMAN Protein phosphatase 1 regulatory subunit 7 OS=Homo sapiens GN=PPP1R7 PE=1 SV=1;>sp Q15435-2 PPP1R7_HUMAN   | 2.50E-116 |        |
| Q15436                 | SEC23A_HUMAN Protein transport protein Sec23A OS=Homo sapiens GN=SEC23A PE=1 SV=2                                       |           | 165.87 |
| Q15437                 | SEC23B_HUMAN Protein transport protein Sec23B OS=Homo sapiens GN=SEC23B PE=1 SV=2                                       |           | 51.31  |
| Q15459                 | SF3A1_HUMAN Splicing factor 3A subunit 1 OS=Homo sapiens GN=Sf3a1 PE=1 SV=1                                             |           | 411.48 |
| Q15477                 | SKIV2_HUMAN Helicase SKI2W OS=Homo sapiens GN=SKIV2L PE=1 SV=3                                                          | 2.35E-05  |        |
| Q15493                 | RGN_HUMAN Regucalcin OS=Homo sapiens GN=RGN PE=1 SV=1                                                                   | 3.94E-48  |        |
| Q15526                 | SURF1_HUMAN Surfeit locus protein 1 OS=Homo sapiens GN=SURF1 PE=1 SV=1                                                  |           |        |
| Q15526-2               | SURF1_HUMAN Isoform 2 of Surfeit locus protein 1 OS=Homo sapiens GN=SURF1                                               |           |        |
| Q15528                 | MED22_HUMAN Mediator of RNA polymerase II transcription subunit 22 OS=Homo sapiens GN=MED22 PE=1 SV=2                   |           |        |
| Q15528-2               | MED22_HUMAN Isoform Surf5A of Mediator of RNA polymerase II transcription subunit 22 OS=Homo sapiens GN=MED22           |           |        |
| Q15542                 | TAF5_HUMAN Transcription initiation factor TFIID subunit 5 OS=Homo sapiens GN=TAF5 PE=1 SV=3                            |           |        |
| Q15542-2               | TAF5_HUMAN Isoform Short of Transcription initiation factor TFIID subunit 5 OS=Homo sapiens GN=TAF5                     |           |        |
| Q15545                 | TAF7_HUMAN Transcription initiation factor TFIID subunit 7 OS=Homo sapiens GN=TAF7 PE=1 SV=1                            | 4.01E-05  |        |
| Q15555;B7Z2L3;B4DJV4;f | MARE2_HUMAN Microtubule-associated protein RP/EB family member 2 OS=Homo sapiens GN=MAPRE2 PE=1 SV=1;>tr B7Z2L3 B7Z2    | 2.09E-11  |        |
| Q15560                 | TCEA2_HUMAN Transcription elongation factor A protein 2 OS=Homo sapiens GN=TCEA2 PE=1 SV=1                              |           |        |
| Q15582                 | BGH3_HUMAN Transforming growth factor-beta-induced protein ig-h3 OS=Homo sapiens GN=TGFBI PE=1 SV=1                     | 2.99E-217 |        |
| Q15599                 | NHRF2_HUMAN Na(+)/H(+) exchange regulatory cofactor NHE-RF2 OS=Homo sapiens GN=SLC9A3R2 PE=1 SV=2                       |           | 540.43 |
| Q15599-2               | NHRF2_HUMAN Isoform 2 of Na(+)/H(+) exchange regulatory cofactor NHE-RF2 OS=Homo sapiens GN=SLC9A3R2                    |           | 516.87 |
| Q15599;Q15599-2        | NHRF2_HUMAN Na(+)/H(+) exchange regulatory cofactor NHE-RF2 OS=Homo sapiens GN=SLC9A3R2 PE=1 SV=2;>sp Q15599-2 NHI      | 2.11E-16  |        |
| Q155Q3                 | DIXC1_HUMAN Dixin OS=Homo sapiens GN=DIXDC1 PE=1 SV=2                                                                   |           | 34.06  |
| Q155Q3-2               | DIXC1_HUMAN Isoform 2 of Dixin OS=Homo sapiens GN=DIXDC1                                                                |           | 14.83  |
| Q155Q3-3               | DIXC1_HUMAN Isoform 3 of Dixin OS=Homo sapiens GN=DIXDC1                                                                |           | 14.83  |
| Q155Q3-4               | DIXC1_HUMAN Isoform 4 of Dixin OS=Homo sapiens GN=DIXDC1                                                                |           | 19.23  |
| Q15628                 | TRADD_HUMAN Tumor necrosis factor receptor type 1-associated DEATH domain protein OS=Homo sapiens GN=TRADD PE=1 SV=2    | 1.48E-09  |        |
| Q15629                 | TRAM1_HUMAN Translocating chain-associated membrane protein 1 OS=Homo sapiens GN=TRAM1 PE=1 SV=3                        |           | 41.36  |
| Q15631                 | TSN_HUMAN Translin OS=Homo sapiens GN=TSN PE=1 SV=1                                                                     |           | 91.9   |
| Q15637                 | SF01_HUMAN Splicing factor 1 OS=Homo sapiens GN=SF1 PE=1 SV=4                                                           |           | 412.9  |
| Q15637-2               | SF01_HUMAN Isoform 2 of Splicing factor 1 OS=Homo sapiens GN=SF1                                                        |           | 412.9  |
| Q15637-3               | SF01_HUMAN Isoform 3 of Splicing factor 1 OS=Homo sapiens GN=SF1                                                        |           | 412.9  |
| Q15637-4               | SF01_HUMAN Isoform 4 of Splicing factor 1 OS=Homo sapiens GN=SF1                                                        |           | 412.9  |
| Q15637-5               | SF01_HUMAN Isoform 5 of Splicing factor 1 OS=Homo sapiens GN=SF1                                                        |           | 418.48 |
| Q15637-6               | SF01_HUMAN Isoform 6 of Splicing factor 1 OS=Homo sapiens GN=SF1                                                        |           | 412.9  |
| Q15637;Q15637-2;B4DJU  | SF01_HUMAN Splicing factor 1 OS=Homo sapiens GN=SF1 PE=1 SV=4;>sp Q15637-2 SF01_HUMAN Isoform 2 of Splicing factor 1 OS | 9.03E-51  |        |
| Q15642                 | CIP4_HUMAN Cdc42-interacting protein 4 OS=Homo sapiens GN=TRIP10 PE=1 SV=3                                              |           | 80.13  |

|                               |                                                                                                                                                                                                                                    |            |        |
|-------------------------------|------------------------------------------------------------------------------------------------------------------------------------------------------------------------------------------------------------------------------------|------------|--------|
| Q15642-2                      | CIP4_HUMAN Isoform 2 of Cdc42-interacting protein 4 OS=Homo sapiens GN=TRIP10                                                                                                                                                      |            | 80.13  |
| Q15642-3                      | CIP4_HUMAN Isoform 3 of Cdc42-interacting protein 4 OS=Homo sapiens GN=TRIP10                                                                                                                                                      |            | 80.13  |
| Q15642-4                      | CIP4_HUMAN Isoform 4 of Cdc42-interacting protein 4 OS=Homo sapiens GN=TRIP10                                                                                                                                                      |            | 80.13  |
| Q15642-5                      | CIP4_HUMAN Isoform 5 of Cdc42-interacting protein 4 OS=Homo sapiens GN=TRIP10                                                                                                                                                      |            | 46.86  |
| Q15642;Q15642-2;Q15643        | CIP4_HUMAN Cdc42-interacting protein 4 OS=Homo sapiens GN=TRIP10 PE=1 SV=3;>sp Q15642-2 CIP4_HUMAN Isoform 2 of Cdc42-interacting protein 4 OS=Homo sapiens GN=TRIP10                                                              | 9.45E-129  |        |
| Q15643                        | TRIPB_HUMAN Thyroid receptor-interacting protein 11 OS=Homo sapiens GN=TRIP11 PE=1 SV=3                                                                                                                                            |            |        |
| Q15645                        | PCH2_HUMAN Pachytene checkpoint protein 2 homolog OS=Homo sapiens GN=TRIP13 PE=1 SV=2                                                                                                                                              |            |        |
| Q15645-2                      | PCH2_HUMAN Isoform 2 of Pachytene checkpoint protein 2 homolog OS=Homo sapiens GN=TRIP13                                                                                                                                           |            |        |
| Q15648                        | MED1_HUMAN Mediator of RNA polymerase II transcription subunit 1 OS=Homo sapiens GN=MED1 PE=1 SV=4                                                                                                                                 |            |        |
| Q15648-3                      | MED1_HUMAN Isoform 2 of Mediator of RNA polymerase II transcription subunit 1 OS=Homo sapiens GN=MED1                                                                                                                              |            |        |
| Q15648;B2RAG9;B4DSK7;Q15650   | MED1_HUMAN Mediator of RNA polymerase II transcription subunit 1 OS=Homo sapiens GN=MED1 PE=1 SV=4;>tr B2RAG9 B2RAG9_HUMAN Isoform 1 of Mediator of RNA polymerase II transcription subunit 1 OS=Homo sapiens GN=MED1              | 2.75E-11   |        |
| Q15651;P05204;Q15651-1;Q15654 | HMG3_HUMAN High mobility group nucleosome-binding domain-containing protein 3 OS=Homo sapiens GN=HMG3 PE=1 SV=2;>sp Q15651-1 HMG3_HUMAN High mobility group nucleosome-binding domain-containing protein 3 OS=Homo sapiens GN=HMG3 | 3.31E-12   |        |
| Q15654                        | TRIP6_HUMAN Thyroid receptor-interacting protein 6 OS=Homo sapiens GN=TRIP6 PE=1 SV=3                                                                                                                                              | 5.97E-11   |        |
| Q15678                        | PTN14_HUMAN Tyrosine-protein phosphatase non-receptor type 14 OS=Homo sapiens GN=PTN14 PE=1 SV=2                                                                                                                                   |            | 43.95  |
| Q15691                        | MARE1_HUMAN Microtubule-associated protein RP/EB family member 1 OS=Homo sapiens GN=MAPRE1 PE=1 SV=3                                                                                                                               |            | 318.93 |
| Q15695                        | U2AF1_HUMAN U2 small nuclear ribonucleoprotein auxiliary factor 35 kDa subunit-related protein 1 OS=Homo sapiens GN=ZRSR1 PE=2 SV=2                                                                                                |            |        |
| Q15699                        | ALX1_HUMAN ALX homeobox protein 1 OS=Homo sapiens GN=ALX1 PE=1 SV=2                                                                                                                                                                |            |        |
| Q15714-2;Q15714;Q15717        | T22D1_HUMAN Isoform 2 of TSC22 domain family protein 1 OS=Homo sapiens GN=TSC22D1;>sp Q15714 T22D1_HUMAN TSC22 domain family protein 1 OS=Homo sapiens GN=TSC22D1                                                                  | 2.18E-60   |        |
| Q15717                        | ELAV1_HUMAN ELAV-like protein 1 OS=Homo sapiens GN=ELAVL1 PE=1 SV=2                                                                                                                                                                |            | 626.96 |
| Q15738                        | NSDHL_HUMAN Sterol-4-alpha-carboxylate 3-dehydrogenase, decarboxylating OS=Homo sapiens GN=NSDHL PE=1 SV=2                                                                                                                         |            | 195.24 |
| Q15746                        | MYLK_HUMAN Myosin light chain kinase, smooth muscle OS=Homo sapiens GN=MYLK PE=1 SV=4                                                                                                                                              |            | 46.14  |
| Q15746-2                      | MYLK_HUMAN Isoform 2 of Myosin light chain kinase, smooth muscle OS=Homo sapiens GN=MYLK                                                                                                                                           |            | 44.95  |
| Q15746-3                      | MYLK_HUMAN Isoform 3A of Myosin light chain kinase, smooth muscle OS=Homo sapiens GN=MYLK                                                                                                                                          |            | 46.14  |
| Q15746-4                      | MYLK_HUMAN Isoform 3B of Myosin light chain kinase, smooth muscle OS=Homo sapiens GN=MYLK                                                                                                                                          |            | 44.95  |
| Q15746-5                      | MYLK_HUMAN Isoform 4 of Myosin light chain kinase, smooth muscle OS=Homo sapiens GN=MYLK                                                                                                                                           |            | 46.14  |
| Q15746-6                      | MYLK_HUMAN Isoform Del-1790 of Myosin light chain kinase, smooth muscle OS=Homo sapiens GN=MYLK                                                                                                                                    |            | 46.14  |
| Q15746-7                      | MYLK_HUMAN Isoform 5 of Myosin light chain kinase, smooth muscle OS=Homo sapiens GN=MYLK                                                                                                                                           |            | 44.95  |
| Q15746;Q15746-6;Q15747        | MYLK_HUMAN Myosin light chain kinase, smooth muscle OS=Homo sapiens GN=MYLK PE=1 SV=4;>sp Q15746-6 MYLK_HUMAN Isoform 4 of Myosin light chain kinase, smooth muscle OS=Homo sapiens GN=MYLK                                        | 1.97E-20   |        |
| Q15750                        | TAB1_HUMAN TGF-beta-activated kinase 1 and MAP3K7-binding protein 1 OS=Homo sapiens GN=TAB1 PE=1 SV=1                                                                                                                              | 0.00016412 |        |
| Q15751                        | HERC1_HUMAN Probable E3 ubiquitin-protein ligase HERC1 OS=Homo sapiens GN=HERC1 PE=1 SV=2                                                                                                                                          |            |        |
| Q15758                        | AAAT_HUMAN Neutral amino acid transporter B(0) OS=Homo sapiens GN=SLC1A5 PE=1 SV=2                                                                                                                                                 |            | 574.24 |
| Q15759                        | MK11_HUMAN Mitogen-activated protein kinase 11 OS=Homo sapiens GN=MAPK11 PE=1 SV=2                                                                                                                                                 |            | 47.34  |
| Q15760                        | GPR19_HUMAN Probable G-protein coupled receptor 19 OS=Homo sapiens GN=GPR19 PE=2 SV=2                                                                                                                                              |            |        |
| Q15771                        | RAB30_HUMAN Ras-related protein Rab-30 OS=Homo sapiens GN=RAB30 PE=1 SV=2                                                                                                                                                          |            | 61.85  |
| Q15785                        | TOM34_HUMAN Mitochondrial import receptor subunit TOM34 OS=Homo sapiens GN=TOM34 PE=1 SV=2                                                                                                                                         |            | 214.04 |
| Q15796;Q15796-2;Q15797        | SMAD2_HUMAN Mothers against decapentaplegic homolog 2 OS=Homo sapiens GN=SMAD2 PE=1 SV=1;>sp Q15796-2 SMAD2_HUMAN Mothers against decapentaplegic homolog 2 OS=Homo sapiens GN=SMAD2                                               | 1.74E-07   |        |
| Q15800                        | ERG25_HUMAN C-4 methylsterol oxidase OS=Homo sapiens GN=SC4MOL PE=1 SV=1                                                                                                                                                           |            | 46.51  |
| Q15811;Q15811-4;Q15812        | ITSN1_HUMAN Intersectin-1 OS=Homo sapiens GN=ITSN1 PE=1 SV=3;>sp Q15811-4 ITSN1_HUMAN Isoform 4 of Intersectin-1 OS=Homo sapiens GN=ITSN1                                                                                          | 1.73E-06   |        |
| Q15813                        | TBCE_HUMAN Tubulin-specific chaperone E OS=Homo sapiens GN=TBCE PE=1 SV=1                                                                                                                                                          | 7.33E-20   |        |
| Q15814                        | TBCC_HUMAN Tubulin-specific chaperone C OS=Homo sapiens GN=TBCC PE=1 SV=2                                                                                                                                                          | 1.58E-49   |        |
| Q15819                        | UB2V2_HUMAN Ubiquitin-conjugating enzyme E2 variant 2 OS=Homo sapiens GN=UBE2V2 PE=1 SV=4                                                                                                                                          |            | 239.46 |
| Q15828                        | CYTM_HUMAN Cystatin-M OS=Homo sapiens GN=CST6 PE=1 SV=1                                                                                                                                                                            | 2.72E-11   |        |
| Q15833                        | STXB2_HUMAN Syntaxin-binding protein 2 OS=Homo sapiens GN=STXBP2 PE=1 SV=2                                                                                                                                                         |            | 59.12  |
| Q15833-2                      | STXB2_HUMAN Isoform 2 of Syntaxin-binding protein 2 OS=Homo sapiens GN=STXBP2                                                                                                                                                      |            | 59.12  |
| Q15833;Q15833-2               | STXB2_HUMAN Syntaxin-binding protein 2 OS=Homo sapiens GN=STXBP2 PE=1 SV=2;>sp Q15833-2 STXB2_HUMAN Isoform 2 of Syntaxin-binding protein 2 OS=Homo sapiens GN=STXBP2                                                              | 3.07E-17   |        |
| Q15836                        | VAMP3_HUMAN Vesicle-associated membrane protein 3 OS=Homo sapiens GN=VAMP3 PE=1 SV=3                                                                                                                                               |            | 310.33 |
| Q15843                        | NEDD8_HUMAN NEDD8 OS=Homo sapiens GN=NEDD8 PE=1 SV=1                                                                                                                                                                               |            | 283.73 |
| Q15847                        | APM2_HUMAN Adipose most abundant gene transcript 2 protein OS=Homo sapiens GN=APM2 PE=1 SV=1                                                                                                                                       | 8.73E-28   |        |
| Q15904                        | VAS1_HUMAN V-type proton ATPase subunit S1 OS=Homo sapiens GN=ATP6AP1 PE=1 SV=2                                                                                                                                                    |            |        |
| Q15907                        | RB11B_HUMAN Ras-related protein Rab-11B OS=Homo sapiens GN=RAB11B PE=1 SV=4                                                                                                                                                        |            | 612.85 |
| Q15910                        | EZH2_HUMAN Histone-lysine N-methyltransferase EZH2 OS=Homo sapiens GN=EZH2 PE=1 SV=2                                                                                                                                               |            |        |
| Q15910-2                      | EZH2_HUMAN Isoform 2 of Histone-lysine N-methyltransferase EZH2 OS=Homo sapiens GN=EZH2                                                                                                                                            |            |        |
| Q15910-3                      | EZH2_HUMAN Isoform 3 of Histone-lysine N-methyltransferase EZH2 OS=Homo sapiens GN=EZH2                                                                                                                                            |            |        |
| Q15910-4                      | EZH2_HUMAN Isoform 4 of Histone-lysine N-methyltransferase EZH2 OS=Homo sapiens GN=EZH2                                                                                                                                            |            |        |
| Q15910-5                      | EZH2_HUMAN Isoform 5 of Histone-lysine N-methyltransferase EZH2 OS=Homo sapiens GN=EZH2                                                                                                                                            |            |        |
| Q15911                        | ZFH3_HUMAN Zinc finger homeobox protein 3 OS=Homo sapiens GN=ZFH3 PE=1 SV=2                                                                                                                                                        |            | 52.77  |
| Q15911-2                      | ZFH3_HUMAN Isoform B of Zinc finger homeobox protein 3 OS=Homo sapiens GN=ZFH3                                                                                                                                                     |            | 28.05  |
| Q15915                        | ZIC1_HUMAN Zinc finger protein ZIC 1 OS=Homo sapiens GN=ZIC1 PE=2 SV=2                                                                                                                                                             |            | 7.49   |
| Q15942                        | ZYX_HUMAN Zyxin OS=Homo sapiens GN=ZYX PE=1 SV=1                                                                                                                                                                                   |            | 323.32 |
| Q16134                        | ETFD_HUMAN Electron transfer flavoprotein-ubiquinone oxidoreductase, mitochondrial OS=Homo sapiens GN=ETFDH PE=1 SV=2                                                                                                              | 1.89E-29   |        |

|                        |                                                                                                                                   |           |          |
|------------------------|-----------------------------------------------------------------------------------------------------------------------------------|-----------|----------|
| Q16181                 | SEPT7_HUMAN Septin-7 OS=Homo sapiens GN=SEPT7 PE=1 SV=2                                                                           |           | 680.59   |
| Q16181-2               | SEPT7_HUMAN Isoform 2 of Septin-7 OS=Homo sapiens GN=SEPT7                                                                        |           | 680.59   |
| Q16181;Q16181-2        | SEPT7_HUMAN Septin-7 OS=Homo sapiens GN=SEPT7 PE=1 SV=2;>sp Q16181-2 SEPT7_HUMAN Isoform 2 of Septin-7 OS=Homo sa                 | 7.12E-146 |          |
| Q16186                 | ADRM1_HUMAN Proteasomal ubiquitin receptor ADRM1 OS=Homo sapiens GN=ADRM1 PE=1 SV=2                                               |           | 102.19   |
| Q16204                 | CCDC6_HUMAN Coiled-coil domain-containing protein 6 OS=Homo sapiens GN=CCDC6 PE=1 SV=2                                            | 3.28E-30  |          |
| Q16222;Q16222-3;Q1622  | UAP1_HUMAN UDP-N-acetylhexosamine pyrophosphorylase OS=Homo sapiens GN=UAP1 PE=1 SV=3;>sp Q16222-3 UAP1_HUMAN Is                  | 1.54E-278 |          |
| Q16270                 | IBP7_HUMAN Insulin-like growth factor-binding protein 7 OS=Homo sapiens GN=IGFBP7 PE=1 SV=1                                       |           | 356.68   |
| Q16280                 | CNGA2_HUMAN Cyclic nucleotide-gated olfactory channel OS=Homo sapiens GN=CNGA2 PE=2 SV=2                                          |           | 23.99    |
| Q16322                 | KCA10_HUMAN Potassium voltage-gated channel subfamily A member 10 OS=Homo sapiens GN=KCNA10 PE=1 SV=2                             |           |          |
| Q16352                 | AINX_HUMAN Alpha-internexin OS=Homo sapiens GN=INA PE=1 SV=2                                                                      |           | 73.44    |
| Q16363;Q16363-2        | LAMA4_HUMAN Laminin subunit alpha-4 OS=Homo sapiens GN=LAMA4 PE=1 SV=4;>sp Q16363-2 LAMA4_HUMAN Isoform 2 of Lami                 | 0         |          |
| Q16394                 | EXT1_HUMAN Exostosin-1 OS=Homo sapiens GN=EXT1 PE=1 SV=2                                                                          |           |          |
| Q16401                 | PSMD5_HUMAN 26S proteasome non-ATPase regulatory subunit 5 OS=Homo sapiens GN=PSMD5 PE=1 SV=3                                     |           | 192.96   |
| Q16512                 | PKN1_HUMAN Serine/threonine-protein kinase N1 OS=Homo sapiens GN=PKN1 PE=1 SV=2                                                   |           | 30.51    |
| Q16512-2               | PKN1_HUMAN Isoform 2 of Serine/threonine-protein kinase N1 OS=Homo sapiens GN=PKN1                                                |           | 30.51    |
| Q16512-2;Q16512        | 2 PKN1_HUMAN Isoform 2 of Serine/threonine-protein kinase N1 OS=Homo sapiens GN=PKN1;>sp Q16512 PKN1_HUMAN Serine/thru            | 8.83E-15  |          |
| Q16512-3               | PKN1_HUMAN Isoform 3 of Serine/threonine-protein kinase N1 OS=Homo sapiens GN=PKN1                                                |           | 30.51    |
| Q16512;Q16512-2;Q1651  | PKN1_HUMAN Serine/threonine-protein kinase N1 OS=Homo sapiens GN=PKN1 PE=1 SV=2;>sp Q16512-2 PKN1_HUMAN Isoform 2 c               | 1.84E-10  |          |
| Q16513                 | PKN2_HUMAN Serine/threonine-protein kinase N2 OS=Homo sapiens GN=PKN2 PE=1 SV=1                                                   |           | 50.71    |
| Q16527                 | CSRP2_HUMAN Cysteine and glycine-rich protein 2 OS=Homo sapiens GN=CSRP2 PE=1 SV=3                                                |           | 48.9     |
| Q16531                 | DDB1_HUMAN DNA damage-binding protein 1 OS=Homo sapiens GN=DDB1 PE=1 SV=1                                                         |           | 359.43   |
| Q16533                 | SNPC1_HUMAN snRNA-activating protein complex subunit 1 OS=Homo sapiens GN=SNAPC1 PE=1 SV=1                                        | 1.19E-08  |          |
| Q16537                 | 2A5E_HUMAN Serine/threonine-protein phosphatase 2A 56 kDa regulatory subunit epsilon isoform OS=Homo sapiens GN=PPP2R5E PE=1 SV=1 |           |          |
| Q16539                 | MK14_HUMAN Mitogen-activated protein kinase 14 OS=Homo sapiens GN=MAPK14 PE=1 SV=3                                                |           | 44.31    |
| Q16539-2               | MK14_HUMAN Isoform CSBP1 of Mitogen-activated protein kinase 14 OS=Homo sapiens GN=MAPK14                                         |           | 44.31    |
| Q16539-3               | MK14_HUMAN Isoform Mxi2 of Mitogen-activated protein kinase 14 OS=Homo sapiens GN=MAPK14                                          |           | 44.31    |
| Q16539-4               | MK14_HUMAN Isoform Ekip of Mitogen-activated protein kinase 14 OS=Homo sapiens GN=MAPK14                                          |           | 44.31    |
| Q16539;Q16539-2;B4E0K  | MK14_HUMAN Mitogen-activated protein kinase 14 OS=Homo sapiens GN=MAPK14 PE=1 SV=3;>sp Q16539-2 MK14_HUMAN Isoform                | 4.89E-136 |          |
| Q16540                 | RM23_HUMAN 39S ribosomal protein L23, mitochondrial OS=Homo sapiens GN=MRPL23 PE=1 SV=1                                           |           | 133.91   |
| Q16543                 | CDC37_HUMAN Hsp90 co-chaperone Cdc37 OS=Homo sapiens GN=CDC37 PE=1 SV=1                                                           |           | 86.26    |
| Q16555                 | DPYL2_HUMAN Dihydropyrimidinase-related protein 2 OS=Homo sapiens GN=DPYSL2 PE=1 SV=1                                             | 0         |          |
| Q16563                 | SYPL1_HUMAN Synaptophysin-like protein 1 OS=Homo sapiens GN=SYPL1 PE=1 SV=1                                                       |           | 76.28    |
| Q16563-2               | SYPL1_HUMAN Isoform 2 of Synaptophysin-like protein 1 OS=Homo sapiens GN=SYPL1                                                    |           | 76.28    |
| Q16563;Q16563-2        | SYPL1_HUMAN Synaptophysin-like protein 1 OS=Homo sapiens GN=SYPL1 PE=1 SV=1;>sp Q16563-2 SYPL1_HUMAN Isoform 2 of Sy              | 1.50E-36  |          |
| Q16566                 | KCC4_HUMAN Calcium/calmodulin-dependent protein kinase type IV OS=Homo sapiens GN=CAMK4 PE=1 SV=1                                 |           |          |
| Q16568                 | CART_HUMAN Cocaine- and amphetamine-regulated transcript protein OS=Homo sapiens GN=CARTPT PE=1 SV=1                              | 1.60E-11  |          |
| Q16576                 | RBBP7_HUMAN Histone-binding protein RBBP7 OS=Homo sapiens GN=RBBP7 PE=1 SV=1                                                      |           | 126.52   |
| Q16594                 | TAF9_HUMAN Transcription initiation factor TFIID subunit 9 OS=Homo sapiens GN=TAF9 PE=1 SV=1                                      |           | 91.13    |
| Q16595                 | FRDA_HUMAN Frataxin, mitochondrial OS=Homo sapiens GN=FXN PE=1 SV=2                                                               |           | 41.04    |
| Q16595-2               | FRDA_HUMAN Isoform 2 of Frataxin, mitochondrial OS=Homo sapiens GN=FXN                                                            |           | 42.81    |
| Q16595;A8MXJ6;C9JJ89;C | FRDA_HUMAN Frataxin, mitochondrial OS=Homo sapiens GN=FXN PE=1 SV=2;>tr A8MXJ6 A8MXJ6_HUMAN Uncharacterized protein (             | 1.75E-10  |          |
| Q16610-3               | ECM1_HUMAN Isoform 3 of Extracellular matrix protein 1 OS=Homo sapiens GN=ECM1                                                    |           |          |
| Q16610-4;Q16610;C8CHS  | 4 ECM1_HUMAN Isoform 4 of Extracellular matrix protein 1 OS=Homo sapiens GN=ECM1;>sp Q16610 ECM1_HUMAN Extracellular ma           | 2.86E-11  |          |
| Q16611                 | BAK_HUMAN Bcl-2 homologous antagonist/killer OS=Homo sapiens GN=BAK1 PE=1 SV=1                                                    |           |          |
| Q16625                 | OCLN_HUMAN Occludin OS=Homo sapiens GN=OCLN PE=1 SV=1                                                                             |           |          |
| Q16626                 | MEA1_HUMAN Male-enhanced antigen 1 OS=Homo sapiens GN=MEA1 PE=1 SV=2                                                              | 4.25E-37  |          |
| Q16629                 | SRSF7_HUMAN Serine/arginine-rich splicing factor 7 OS=Homo sapiens GN=SRSF7 PE=1 SV=1                                             |           | 295.38   |
| Q16629-2               | SRSF7_HUMAN Isoform 2 of Serine/arginine-rich splicing factor 7 OS=Homo sapiens GN=SRSF7                                          |           | 295.38   |
| Q16629-3               | SRSF7_HUMAN Isoform 3 of Serine/arginine-rich splicing factor 7 OS=Homo sapiens GN=SRSF7                                          |           | 295.38   |
| Q16629;Q16629-2;Q1662  | SRSF7_HUMAN Serine/arginine-rich splicing factor 7 OS=Homo sapiens GN=SRSF7 PE=1 SV=1;>sp Q16629-2 SRSF7_HUMAN Isoform            | 7.25E-71  |          |
| Q16630                 | CPSF6_HUMAN Cleavage and polyadenylation specificity factor subunit 6 OS=Homo sapiens GN=CPSF6 PE=1 SV=2                          |           | 265.7    |
| Q16630-2               | CPSF6_HUMAN Isoform 2 of Cleavage and polyadenylation specificity factor subunit 6 OS=Homo sapiens GN=CPSF6                       |           | 265.7    |
| Q16630-2;Q16630;C9JGC  | 2 CPSF6_HUMAN Isoform 2 of Cleavage and polyadenylation specificity factor subunit 6 OS=Homo sapiens GN=CPSF6;>sp Q16630 CI       | 0         |          |
| Q16630-3               | CPSF6_HUMAN Isoform 3 of Cleavage and polyadenylation specificity factor subunit 6 OS=Homo sapiens GN=CPSF6                       |           | 263.6    |
| Q16637;Q16637-3;Q1663  | SMN_HUMAN Survival motor neuron protein OS=Homo sapiens GN=SMN1 PE=1 SV=1;>sp Q16637-3 SMN_HUMAN Isoform SMN-delt                 | 2.06E-14  |          |
| Q16643                 | DREB_HUMAN Drebrin OS=Homo sapiens GN=DBN1 PE=1 SV=4                                                                              |           |          |
| Q16643-2               | DREB_HUMAN Isoform 2 of Drebrin OS=Homo sapiens GN=DBN1                                                                           |           |          |
| Q16643-2;Q16643        | 2 DREB_HUMAN Isoform 2 of Drebrin OS=Homo sapiens GN=DBN1;>sp Q16643 DREB_HUMAN Drebrin OS=Homo sapiens GN=DBN1                   | 7.07E-86  |          |
| Q16643;Q16643-2        | DREB_HUMAN Drebrin OS=Homo sapiens GN=DBN1 PE=1 SV=4;>sp Q16643-2 DREB_HUMAN Isoform 2 of Drebrin OS=Homo sapier                  | 2.25E-25  |          |
| Q16647                 | PTGIS_HUMAN Prostacyclin synthase OS=Homo sapiens GN=PTGIS PE=1 SV=1                                                              |           | 8.69E-20 |
| Q16650                 | TBR1_HUMAN T-box brain protein 1 OS=Homo sapiens GN=TBR1 PE=1 SV=1                                                                |           |          |

|                       |                                                                                                                             |           |        |
|-----------------------|-----------------------------------------------------------------------------------------------------------------------------|-----------|--------|
| Q16651                | PRSS8_HUMAN Prostatic OS=Homo sapiens GN=PRSS8 PE=1 SV=1                                                                    | 1.39E-12  |        |
| Q16656                | NRF1_HUMAN Nuclear respiratory factor 1 OS=Homo sapiens GN=NRF1 PE=1 SV=1                                                   |           |        |
| Q16656-2              | NRF1_HUMAN Isoform Short of Nuclear respiratory factor 1 OS=Homo sapiens GN=NRF1                                            |           |        |
| Q16658                | FSCN1_HUMAN Fascin OS=Homo sapiens GN=FSCN1 PE=1 SV=3                                                                       | 4.18E-29  |        |
| Q16659                | MK06_HUMAN Mitogen-activated protein kinase 6 OS=Homo sapiens GN=MAPK6 PE=1 SV=1                                            |           | 27.93  |
| Q16661                | GUC2B_HUMAN Guanylate cyclase activator 2B OS=Homo sapiens GN=GUCA2B PE=1 SV=1                                              |           |        |
| Q16666                | IFI16_HUMAN Gamma-interferon-inducible protein 16 OS=Homo sapiens GN=IFI16 PE=1 SV=3                                        |           | 342.24 |
| Q16666-2              | IFI16_HUMAN Isoform 2 of Gamma-interferon-inducible protein 16 OS=Homo sapiens GN=IFI16                                     |           | 342.24 |
| Q16666-3              | IFI16_HUMAN Isoform 3 of Gamma-interferon-inducible protein 16 OS=Homo sapiens GN=IFI16                                     |           | 342.24 |
| Q16666-5              | IFI16_HUMAN Isoform 4 of Gamma-interferon-inducible protein 16 OS=Homo sapiens GN=IFI16                                     |           | 313.86 |
| Q16666;D3DUZ3;Q16666  | IFI16_HUMAN Gamma-interferon-inducible protein 16 OS=Homo sapiens GN=IFI16 PE=1 SV=3;>tr D3DUZ3 D3DUZ3_HUMAN Interfer       | 1.12E-29  |        |
| Q16695                | H31T_HUMAN Histone H3.1t OS=Homo sapiens GN=HIST3H3 PE=1 SV=3                                                               |           | 180.26 |
| Q16696                | CP2AD_HUMAN Cytochrome P450 2A13 OS=Homo sapiens GN=CYP2A13 PE=1 SV=3                                                       |           |        |
| Q16698                | DECR_HUMAN 2,4-dienoyl-CoA reductase, mitochondrial OS=Homo sapiens GN=DECR1 PE=1 SV=1                                      |           | 312.75 |
| Q16706                | MA2A1_HUMAN Alpha-mannosidase 2 OS=Homo sapiens GN=MAN2A1 PE=1 SV=2                                                         |           | 37.78  |
| Q16718                | NDUA5_HUMAN NADH dehydrogenase [ubiquinone] 1 alpha subcomplex subunit 5 OS=Homo sapiens GN=NDUFA5 PE=1 SV=3                |           | 125.88 |
| Q16719                | KYNU_HUMAN Kynureninase OS=Homo sapiens GN=KYNU PE=1 SV=1                                                                   |           |        |
| Q16720                | AT2B3_HUMAN Plasma membrane calcium-transporting ATPase 3 OS=Homo sapiens GN=ATP2B3 PE=1 SV=3                               |           | 465.41 |
| Q16720-2              | AT2B3_HUMAN Isoform XA of Plasma membrane calcium-transporting ATPase 3 OS=Homo sapiens GN=ATP2B3                           |           | 460.01 |
| Q16720-3              | AT2B3_HUMAN Isoform ZA of Plasma membrane calcium-transporting ATPase 3 OS=Homo sapiens GN=ATP2B3                           |           | 460.01 |
| Q16720-4              | AT2B3_HUMAN Isoform ZB of Plasma membrane calcium-transporting ATPase 3 OS=Homo sapiens GN=ATP2B3                           |           | 465.41 |
| Q16720-5              | AT2B3_HUMAN Isoform XE of Plasma membrane calcium-transporting ATPase 3 OS=Homo sapiens GN=ATP2B3                           |           | 460.01 |
| Q16720-6              | AT2B3_HUMAN Isoform ZE of Plasma membrane calcium-transporting ATPase 3 OS=Homo sapiens GN=ATP2B3                           |           | 460.01 |
| Q16720-7              | AT2B3_HUMAN Isoform XG of Plasma membrane calcium-transporting ATPase 3 OS=Homo sapiens GN=ATP2B3                           |           | 465.22 |
| Q16720-8              | AT2B3_HUMAN Isoform ZG of Plasma membrane calcium-transporting ATPase 3 OS=Homo sapiens GN=ATP2B3                           |           | 465.22 |
| Q16720;Q16720-4;Q1672 | AT2B3_HUMAN Plasma membrane calcium-transporting ATPase 3 OS=Homo sapiens GN=ATP2B3 PE=1 SV=3;>sp Q16720-4 AT2B3_           | 4.06E-54  |        |
| Q16739                | CEGT_HUMAN Ceramide glucosyltransferase OS=Homo sapiens GN=UGCG PE=1 SV=1                                                   |           | 86.99  |
| Q16740                | CLPP_HUMAN Putative ATP-dependent Clp protease proteolytic subunit, mitochondrial OS=Homo sapiens GN=CLPP PE=1 SV=1         |           | 213.19 |
| Q16762                | THTR_HUMAN Thiosulfate sulfurtransferase OS=Homo sapiens GN=TST PE=1 SV=4                                                   |           | 60.52  |
| Q16763                | UBE2S_HUMAN Ubiquitin-conjugating enzyme E2 S OS=Homo sapiens GN=UBE2S PE=1 SV=2                                            | 1.70E-17  |        |
| Q16774                | KGUA_HUMAN Guanylate kinase OS=Homo sapiens GN=GUK1 PE=1 SV=2                                                               | 1.40E-14  |        |
| Q16775                | GLO2_HUMAN Hydroxyacylglutathione hydrolase, mitochondrial OS=Homo sapiens GN=HAGH PE=1 SV=2                                |           | 32.94  |
| Q16775-2              | GLO2_HUMAN Isoform 2 of Hydroxyacylglutathione hydrolase, mitochondrial OS=Homo sapiens GN=HAGH                             |           | 32.94  |
| Q16775;B4DT01;Q16775- | GLO2_HUMAN Hydroxyacylglutathione hydrolase, mitochondrial OS=Homo sapiens GN=HAGH PE=1 SV=2;>tr B4DT01 B4DT01_HUMA         | 7.43E-18  |        |
| Q16777                | H2A2C_HUMAN Histone H2A type 2-C OS=Homo sapiens GN=HIST2H2AC PE=1 SV=4                                                     |           | 288.83 |
| Q16778                | H2B2E_HUMAN Histone H2B type 2-E OS=Homo sapiens GN=HIST2H2BE PE=1 SV=3                                                     |           | 729.36 |
| Q16787;Q16787-1       | LAMA3_HUMAN Laminin subunit alpha-3 OS=Homo sapiens GN=LAMA3 PE=1 SV=2;>sp Q16787-1 LAMA3_HUMAN Isoform 1 of Lami           | 1.38E-17  |        |
| Q16795                | NDUA9_HUMAN NADH dehydrogenase [ubiquinone] 1 alpha subcomplex subunit 9, mitochondrial OS=Homo sapiens GN=NDUFA9 PE=1 SV=2 |           | 161.52 |
| Q16799                | RTN1_HUMAN Reticulon-1 OS=Homo sapiens GN=RTN1 PE=1 SV=1                                                                    |           | 38.7   |
| Q16799-2              | RTN1_HUMAN Isoform RTN1-B of Reticulon-1 OS=Homo sapiens GN=RTN1                                                            |           | 38.7   |
| Q16799-3              | RTN1_HUMAN Isoform RTN1-C of Reticulon-1 OS=Homo sapiens GN=RTN1                                                            |           | 38.7   |
| Q16799;Q16799-2;Q1679 | RTN1_HUMAN Reticulon-1 OS=Homo sapiens GN=RTN1 PE=1 SV=1;>sp Q16799-2 RTN1_HUMAN Isoform RTN1-B of Reticulon-1 OS=          | 1.64E-06  |        |
| Q16816                | PHKG1_HUMAN Phosphorylase b kinase gamma catalytic chain, skeletal muscle isoform OS=Homo sapiens GN=PHKG1 PE=2 SV=3        |           | 20.47  |
| Q16820                | MEP1B_HUMAN Meprin A subunit beta OS=Homo sapiens GN=MEP1B PE=1 SV=3                                                        |           |        |
| Q16822                | PCKGM_HUMAN Phosphoenolpyruvate carboxykinase [GTP], mitochondrial OS=Homo sapiens GN=PCK2 PE=1 SV=3                        |           | 429.01 |
| Q16822-2              | PCKGM_HUMAN Isoform 2 of Phosphoenolpyruvate carboxykinase [GTP], mitochondrial OS=Homo sapiens GN=PCK2                     |           | 210.18 |
| Q16822;Q16822-2       | PCKGM_HUMAN Phosphoenolpyruvate carboxykinase [GTP], mitochondrial OS=Homo sapiens GN=PCK2 PE=1 SV=3;>sp Q16822-2 P         | 1.90E-219 |        |
| Q16825                | PTN21_HUMAN Tyrosine-protein phosphatase non-receptor type 21 OS=Homo sapiens GN=PTPN21 PE=1 SV=2                           |           | 2.47   |
| Q16831                | UPP1_HUMAN Uridine phosphorylase 1 OS=Homo sapiens GN=UPP1 PE=1 SV=1                                                        | 7.90E-11  |        |
| Q16832                | DDR2_HUMAN Discoidin domain-containing receptor 2 OS=Homo sapiens GN=DDR2 PE=1 SV=2                                         |           |        |
| Q16836                | HCDH_HUMAN Hydroxyacyl-coenzyme A dehydrogenase, mitochondrial OS=Homo sapiens GN=HADH PE=1 SV=3                            |           | 345.25 |
| Q16836-2              | HCDH_HUMAN Isoform 2 of Hydroxyacyl-coenzyme A dehydrogenase, mitochondrial OS=Homo sapiens GN=HADH                         |           | 345.25 |
| Q16836-2;B3KTT6;B2RB0 | 2 HCDH_HUMAN Isoform 2 of Hydroxyacyl-coenzyme A dehydrogenase, mitochondrial OS=Homo sapiens GN=HADH;>tr B3KTT6 B3K        | 2.50E-76  |        |
| Q16850                | CP51A_HUMAN Lanosterol 14-alpha demethylase OS=Homo sapiens GN=CYP51A1 PE=1 SV=3                                            |           | 63.12  |
| Q16850-2              | CP51A_HUMAN Isoform 2 of Lanosterol 14-alpha demethylase OS=Homo sapiens GN=CYP51A1                                         |           | 63.12  |
| Q16850;B3KRC6;Q05D40; | CP51A_HUMAN Lanosterol 14-alpha demethylase OS=Homo sapiens GN=CYP51A1 PE=1 SV=3;>tr B3KRC6 B3KRC6_HUMAN cDNA FL            | 1.88E-27  |        |
| Q16851;Q16851-2       | UGPA_HUMAN UTP--glucose-1-phosphate uridylyltransferase OS=Homo sapiens GN=UGP2 PE=1 SV=5;>sp Q16851-2 UGPA_HUMAN           | 9.94E-56  |        |
| Q16853                | AOC3_HUMAN Membrane primary amine oxidase OS=Homo sapiens GN=AOC3 PE=1 SV=3                                                 | 4.02E-09  |        |
| Q16864                | VATF_HUMAN V-type proton ATPase subunit F OS=Homo sapiens GN=ATP6V1F PE=1 SV=2                                              |           |        |
| Q16875                | F263_HUMAN 6-phosphofructo-2-kinase/fructose-2,6-biphosphatase 3 OS=Homo sapiens GN=PFKFB3 PE=1 SV=1                        |           |        |
| Q16875-2              | F263_HUMAN Isoform 2 of 6-phosphofructo-2-kinase/fructose-2,6-biphosphatase 3 OS=Homo sapiens GN=PFKFB3                     |           |        |



|                       |                                                                                                                       |           |        |
|-----------------------|-----------------------------------------------------------------------------------------------------------------------|-----------|--------|
| Q16877                | F264_HUMAN 6-phosphofructo-2-kinase/fructose-2,6-biphosphatase 4 OS=Homo sapiens GN=PFKFB4 PE=2 SV=6                  |           |        |
| Q16881                | TRXR1_HUMAN Thioredoxin reductase 1, cytoplasmic OS=Homo sapiens GN=TXNRD1 PE=1 SV=3                                  |           | 66.12  |
| Q16881-2              | TRXR1_HUMAN Isoform 2 of Thioredoxin reductase 1, cytoplasmic OS=Homo sapiens GN=TXNRD1                               |           | 66.12  |
| Q16881-3              | TRXR1_HUMAN Isoform 3 of Thioredoxin reductase 1, cytoplasmic OS=Homo sapiens GN=TXNRD1                               |           | 66.12  |
| Q16881-4              | TRXR1_HUMAN Isoform 4 of Thioredoxin reductase 1, cytoplasmic OS=Homo sapiens GN=TXNRD1                               |           | 66.12  |
| Q16881-5              | TRXR1_HUMAN Isoform 5 of Thioredoxin reductase 1, cytoplasmic OS=Homo sapiens GN=TXNRD1                               |           | 66.12  |
| Q16881-6              | TRXR1_HUMAN Isoform 6 of Thioredoxin reductase 1, cytoplasmic OS=Homo sapiens GN=TXNRD1                               |           | 66.12  |
| Q16881;B7Z904;Q16881- | TRXR1_HUMAN Thioredoxin reductase 1, cytoplasmic OS=Homo sapiens GN=TXNRD1 PE=1 SV=3;>tr B7Z904 B7Z904_HUMAN Thior    | 0         |        |
| Q16890;Q16890-2;Q1689 | TPD53_HUMAN Tumor protein D53 OS=Homo sapiens GN=TPD52L1 PE=1 SV=1;>sp Q16890-2 TPD53_HUMAN Isoform 2 of Tumor pr     | 7.09E-31  |        |
| Q16891                | IMMT_HUMAN Mitochondrial inner membrane protein OS=Homo sapiens GN=IMMT PE=1 SV=1                                     |           | 596.96 |
| Q16891-2              | IMMT_HUMAN Isoform 2 of Mitochondrial inner membrane protein OS=Homo sapiens GN=IMMT                                  |           | 599.95 |
| Q16891-3              | IMMT_HUMAN Isoform 3 of Mitochondrial inner membrane protein OS=Homo sapiens GN=IMMT                                  |           | 560.72 |
| Q16891;Q16891-2;Q1689 | IMMT_HUMAN Mitochondrial inner membrane protein OS=Homo sapiens GN=IMMT PE=1 SV=1;>sp Q16891-2 IMMT_HUMAN Isoform     | 0         |        |
| Q17R89                | RHG44_HUMAN Rho GTPase-activating protein 44 OS=Homo sapiens GN=ARHGAP44 PE=1 SV=1                                    |           |        |
| Q17R98                | ZN827_HUMAN Zinc finger protein 827 OS=Homo sapiens GN=ZNF827 PE=2 SV=1                                               |           |        |
| Q17R98-2              | ZN827_HUMAN Isoform 2 of Zinc finger protein 827 OS=Homo sapiens GN=ZNF827                                            |           |        |
| Q17R98-3              | ZN827_HUMAN Isoform 3 of Zinc finger protein 827 OS=Homo sapiens GN=ZNF827                                            |           |        |
| Q17RW2                | COOA1_HUMAN Collagen alpha-1(XXIV) chain OS=Homo sapiens GN=COL24A1 PE=2 SV=2                                         |           |        |
| Q17RW2-2              | COOA1_HUMAN Isoform 2 of Collagen alpha-1(XXIV) chain OS=Homo sapiens GN=COL24A1                                      |           |        |
| Q1ED39                | CP088_HUMAN Protein C16orf88 OS=Homo sapiens GN=C16orf88 PE=1 SV=1                                                    |           |        |
| Q1HG43                | DOXA1_HUMAN Dual oxidase maturation factor 1 OS=Homo sapiens GN=DUOXA1 PE=1 SV=1                                      |           |        |
| Q1HG43-2              | DOXA1_HUMAN Isoform 2 of Dual oxidase maturation factor 1 OS=Homo sapiens GN=DUOXA1                                   |           |        |
| Q1HG43-3              | DOXA1_HUMAN Isoform 3 of Dual oxidase maturation factor 1 OS=Homo sapiens GN=DUOXA1                                   |           |        |
| Q1KMD3                | HNRL2_HUMAN Heterogeneous nuclear ribonucleoprotein U-like protein 2 OS=Homo sapiens GN=HNRNPUL2 PE=1 SV=1            |           | 334.89 |
| Q1MX18                | INSC_HUMAN Protein inscuteable homolog OS=Homo sapiens GN=INSC PE=1 SV=1                                              |           |        |
| Q1MX18-2              | INSC_HUMAN Isoform 2 of Protein inscuteable homolog OS=Homo sapiens GN=INSC                                           |           |        |
| Q1MX18-4              | INSC_HUMAN Isoform 4 of Protein inscuteable homolog OS=Homo sapiens GN=INSC                                           |           |        |
| Q1RN00                | YC018_HUMAN Putative uncharacterized protein LOC151760 OS=Homo sapiens PE=2 SV=1                                      |           |        |
| Q24JP5                | T132A_HUMAN Transmembrane protein 132A OS=Homo sapiens GN=TMEM132A PE=2 SV=1                                          |           |        |
| Q24JP5-2              | T132A_HUMAN Isoform 2 of Transmembrane protein 132A OS=Homo sapiens GN=TMEM132A                                       |           |        |
| Q24JP5-3              | T132A_HUMAN Isoform 3 of Transmembrane protein 132A OS=Homo sapiens GN=TMEM132A                                       |           |        |
| Q24JP5-4              | T132A_HUMAN Isoform 4 of Transmembrane protein 132A OS=Homo sapiens GN=TMEM132A                                       |           |        |
| Q27J81                | INF2_HUMAN Inverted formin-2 OS=Homo sapiens GN=INF2 PE=1 SV=2                                                        |           | 39.34  |
| Q27J81-2              | INF2_HUMAN Isoform 2 of Inverted formin-2 OS=Homo sapiens GN=INF2                                                     |           | 39.34  |
| Q27J81-3              | INF2_HUMAN Isoform 3 of Inverted formin-2 OS=Homo sapiens GN=INF2                                                     |           | 35.61  |
| Q27J81;Q27J81-2       | INF2_HUMAN Inverted formin-2 OS=Homo sapiens GN=INF2 PE=1 SV=2;>sp Q27J81-2 INF2_HUMAN Isoform 2 of Inverted formin-2 | 1.01E-48  |        |
| Q29718                | 1B82_HUMAN HLA class I histocompatibility antigen, B-82 alpha chain OS=Homo sapiens GN=HLA-B PE=2 SV=1                |           | 314.84 |
| Q29836                | 1B67_HUMAN HLA class I histocompatibility antigen, B-67 alpha chain OS=Homo sapiens GN=HLA-B PE=1 SV=1                |           | 382.83 |
| Q29865                | 1C18_HUMAN HLA class I histocompatibility antigen, Cw-18 alpha chain OS=Homo sapiens GN=HLA-C PE=2 SV=1               |           | 357.73 |
| Q29940                | 1B59_HUMAN HLA class I histocompatibility antigen, B-59 alpha chain OS=Homo sapiens GN=HLA-B PE=2 SV=1                |           | 499.59 |
| Q29960                | 1C16_HUMAN HLA class I histocompatibility antigen, Cw-16 alpha chain OS=Homo sapiens GN=HLA-C PE=2 SV=1               |           | 407.43 |
| Q29960-2              | 1C16_HUMAN Isoform 2 of HLA class I histocompatibility antigen, Cw-16 alpha chain OS=Homo sapiens GN=HLA-C            |           | 407.43 |
| Q29963                | 1C06_HUMAN HLA class I histocompatibility antigen, Cw-6 alpha chain OS=Homo sapiens GN=HLA-C PE=1 SV=2                |           | 417.3  |
| Q29974                | 2B1G_HUMAN HLA class II histocompatibility antigen, DRB1-16 beta chain OS=Homo sapiens GN=HLA-DRB1 PE=1 SV=1          |           | 29.42  |
| Q29980                | MICB_HUMAN MHC class I polypeptide-related sequence B OS=Homo sapiens GN=MICB PE=1 SV=1                               |           |        |
| Q29RF7                | PDS5A_HUMAN Sister chromatid cohesion protein PDS5 homolog A OS=Homo sapiens GN=PDS5A PE=1 SV=1                       |           | 224.81 |
| Q29RF7-3              | PDS5A_HUMAN Isoform 2 of Sister chromatid cohesion protein PDS5 homolog A OS=Homo sapiens GN=PDS5A                    |           | 55.9   |
| Q29RF7;Q29RF7-3       | PDS5A_HUMAN Sister chromatid cohesion protein PDS5 homolog A OS=Homo sapiens GN=PDS5A PE=1 SV=1;>sp Q29RF7-3 PDS5A_   | 3.93E-116 |        |
| Q2KHT3                | CL16A_HUMAN Protein CLEC16A OS=Homo sapiens GN=CLEC16A PE=2 SV=2                                                      |           |        |
| Q2KHT3-2              | CL16A_HUMAN Isoform 2 of Protein CLEC16A OS=Homo sapiens GN=CLEC16A                                                   |           |        |
| Q2KHT3;Q2KHT3-2       | CL16A_HUMAN Protein CLEC16A OS=Homo sapiens GN=CLEC16A PE=2 SV=2;>sp Q2KHT3-2 CL16A_HUMAN Isoform 2 of Protein CLI    | 5.86E-06  |        |
| Q2KHT4                | GSG1_HUMAN Germ cell-specific gene 1 protein OS=Homo sapiens GN=GSG1 PE=2 SV=2                                        |           |        |
| Q2KHT4-2              | GSG1_HUMAN Isoform 2 of Germ cell-specific gene 1 protein OS=Homo sapiens GN=GSG1                                     |           |        |
| Q2KHT4-3              | GSG1_HUMAN Isoform 3 of Germ cell-specific gene 1 protein OS=Homo sapiens GN=GSG1                                     |           |        |
| Q2KHT4-4              | GSG1_HUMAN Isoform 4 of Germ cell-specific gene 1 protein OS=Homo sapiens GN=GSG1                                     |           |        |
| Q2KHT4-5              | GSG1_HUMAN Isoform 5 of Germ cell-specific gene 1 protein OS=Homo sapiens GN=GSG1                                     |           |        |
| Q2KHT4-6              | GSG1_HUMAN Isoform 6 of Germ cell-specific gene 1 protein OS=Homo sapiens GN=GSG1                                     |           |        |
| Q2KHT4-7              | GSG1_HUMAN Isoform 7 of Germ cell-specific gene 1 protein OS=Homo sapiens GN=GSG1                                     |           |        |
| Q2KHT4-8              | GSG1_HUMAN Isoform 8 of Germ cell-specific gene 1 protein OS=Homo sapiens GN=GSG1                                     |           |        |
| Q2LD37;Q2LD37-4;C9JN5 | K1109_HUMAN Uncharacterized protein KIAA1109 OS=Homo sapiens GN=KIAA1109 PE=1 SV=2;>sp Q2LD37-4 K1109_HUMAN Isofo     | 1.78E-07  |        |
| Q2M1K9                | ZN423_HUMAN Zinc finger protein 423 OS=Homo sapiens GN=ZNF423 PE=1 SV=1                                               |           | 20.89  |

|                            |                                                                                                                                 |           |        |
|----------------------------|---------------------------------------------------------------------------------------------------------------------------------|-----------|--------|
| Q2M238                     | RRN3L_HUMAN Putative RRN3-like protein FLJ77916 OS=Homo sapiens PE=5 SV=1                                                       |           |        |
| Q2M243                     | CCD27_HUMAN Coiled-coil domain-containing protein 27 OS=Homo sapiens GN=CCDC27 PE=2 SV=2                                        |           |        |
| Q2M296                     | MTHSD_HUMAN Methenyltetrahydrofolate synthase domain-containing protein OS=Homo sapiens GN=MTHFSD PE=1 SV=2                     |           |        |
| Q2M296-2                   | MTHSD_HUMAN Isoform 2 of Methenyltetrahydrofolate synthase domain-containing protein OS=Homo sapiens GN=MTHFSD                  |           |        |
| Q2M215                     | K1C24_HUMAN Keratin, type I cytoskeletal 24 OS=Homo sapiens GN=KRT24 PE=1 SV=1                                                  |           | 139.63 |
| Q2M218;B7ZLC4;Q2M218-2     | AAK1_HUMAN AP2-associated protein kinase 1 OS=Homo sapiens GN=AAK1 PE=1 SV=3;>tr B7ZLC4 B7ZLC4_HUMAN AAK1 protein C             | 3.31E-06  |        |
| Q2M329                     | CCD96_HUMAN Coiled-coil domain-containing protein 96 OS=Homo sapiens GN=CCDC96 PE=2 SV=2                                        |           |        |
| Q2M389                     | WAHS7_HUMAN WASH complex subunit 7 OS=Homo sapiens GN=KIAA1033 PE=1 SV=2                                                        |           |        |
| Q2M389-2                   | WAHS7_HUMAN Isoform 2 of WASH complex subunit 7 OS=Homo sapiens GN=KIAA1033                                                     |           |        |
| Q2M389;Q2M389-2            | WAHS7_HUMAN WASH complex subunit 7 OS=Homo sapiens GN=KIAA1033 PE=1 SV=2;>sp Q2M389-2 WAHS7_HUMAN Isoform 2 of                  | 2.23E-11  |        |
| Q2M3C7                     | SPKAP_HUMAN A-kinase anchor protein SPHKAP OS=Homo sapiens GN=SPHKAP PE=1 SV=1                                                  |           |        |
| Q2M3C7-2                   | SPKAP_HUMAN Isoform 2 of A-kinase anchor protein SPHKAP OS=Homo sapiens GN=SPHKAP                                               |           |        |
| Q2M3X9                     | ZN674_HUMAN Zinc finger protein 674 OS=Homo sapiens GN=ZNF674 PE=1 SV=1                                                         |           | 27.01  |
| Q2NKQ1                     | SGSM1_HUMAN Small G protein signaling modulator 1 OS=Homo sapiens GN=SGSM1 PE=1 SV=2                                            |           |        |
| Q2NKQ1-3                   | SGSM1_HUMAN Isoform 2 of Small G protein signaling modulator 1 OS=Homo sapiens GN=SGSM1                                         |           |        |
| Q2NKQ1-4                   | SGSM1_HUMAN Isoform 3 of Small G protein signaling modulator 1 OS=Homo sapiens GN=SGSM1                                         |           |        |
| Q2NKX8                     | ERC6L_HUMAN DNA excision repair protein ERCC-6-like OS=Homo sapiens GN=ERCC6L PE=1 SV=1                                         | 5.31E-07  |        |
| Q2NL67                     | PARP6_HUMAN Poly [ADP-ribose] polymerase 6 OS=Homo sapiens GN=PARP6 PE=2 SV=1                                                   |           |        |
| Q2NL67-2                   | PARP6_HUMAN Isoform 2 of Poly [ADP-ribose] polymerase 6 OS=Homo sapiens GN=PARP6                                                |           |        |
| Q2NL67-3                   | PARP6_HUMAN Isoform 3 of Poly [ADP-ribose] polymerase 6 OS=Homo sapiens GN=PARP6                                                |           |        |
| Q2NL82                     | TSR1_HUMAN Pre-rRNA-processing protein TSR1 homolog OS=Homo sapiens GN=TSR1 PE=1 SV=1                                           |           | 212.82 |
| Q2Q1W2                     | LIN41_HUMAN Tripartite motif-containing protein 71 OS=Homo sapiens GN=TRIM71 PE=2 SV=1                                          |           |        |
| Q2T9F4                     | IN4L2_HUMAN Integrator complex subunit 4-like protein 2 OS=Homo sapiens GN=INTS4L2 PE=2 SV=1                                    |           |        |
| Q2TAA2                     | IAH1_HUMAN Isoamyl acetate-hydrolyzing esterase 1 homolog OS=Homo sapiens GN=IAH1 PE=1 SV=1                                     |           | 55.99  |
| Q2TAL8                     | QRIC1_HUMAN Glutamine-rich protein 1 OS=Homo sapiens GN=QRICH1 PE=1 SV=1                                                        | 1.20E-17  |        |
| Q2TAY7                     | SMU1_HUMAN WD40 repeat-containing protein SMU1 OS=Homo sapiens GN=SMU1 PE=1 SV=2                                                |           | 227.67 |
| Q2TB90                     | HKDC1_HUMAN Putative hexokinase HKDC1 OS=Homo sapiens GN=HKDC1 PE=2 SV=3                                                        |           | 99.24  |
| Q2TB90-2                   | HKDC1_HUMAN Isoform 2 of Putative hexokinase HKDC1 OS=Homo sapiens GN=HKDC1                                                     |           | 7.7    |
| Q2TB90-3                   | HKDC1_HUMAN Isoform 3 of Putative hexokinase HKDC1 OS=Homo sapiens GN=HKDC1                                                     |           | 7.7    |
| Q2TBA0;Q2TBA0-2            | KBTB5_HUMAN Kelch repeat and BTB domain-containing protein 5 OS=Homo sapiens GN=KBTBD5 PE=2 SV=2;>sp Q2TBA0-2 KBTB5             | 8.00E-06  |        |
| Q2TBF2                     | WSCD2_HUMAN WSC domain-containing protein 2 OS=Homo sapiens GN=WSCD2 PE=2 SV=2                                                  |           |        |
| Q2TBF2-2                   | WSCD2_HUMAN Isoform 2 of WSC domain-containing protein 2 OS=Homo sapiens GN=WSCD2                                               |           |        |
| Q2VIQ3                     | KIF4B_HUMAN Chromosome-associated kinesin KIF4B OS=Homo sapiens GN=KIF4B PE=1 SV=2                                              |           |        |
| Q2VIR3                     | IF2GL_HUMAN Eukaryotic translation initiation factor 2 subunit 3-like protein OS=Homo sapiens GN=EIF2S3L PE=1 SV=2              |           | 543.38 |
| Q2VIR3-2                   | IF2GL_HUMAN Isoform 2 of Eukaryotic translation initiation factor 2 subunit 3-like protein OS=Homo sapiens GN=EIF2S3L           |           | 477.71 |
| Q30134                     | 2B18_HUMAN HLA class II histocompatibility antigen, DRB1-8 beta chain OS=Homo sapiens GN=HLA-DRB1 PE=1 SV=2                     |           | 29.27  |
| Q30154                     | DRB5_HUMAN HLA class II histocompatibility antigen, DR beta 5 chain OS=Homo sapiens GN=HLA-DRB5 PE=1 SV=1                       |           | 29.27  |
| Q30167                     | 2B1A_HUMAN HLA class II histocompatibility antigen, DRB1-10 beta chain OS=Homo sapiens GN=HLA-DRB1 PE=1 SV=2                    |           | 29.42  |
| Q30201                     | HFE_HUMAN Hereditary hemochromatosis protein OS=Homo sapiens GN=HFE PE=1 SV=1                                                   |           |        |
| Q30201-2                   | HFE_HUMAN Isoform 2 of Hereditary hemochromatosis protein OS=Homo sapiens GN=HFE                                                |           |        |
| Q30201-5                   | HFE_HUMAN Isoform 5 of Hereditary hemochromatosis protein OS=Homo sapiens GN=HFE                                                |           |        |
| Q30201-6                   | HFE_HUMAN Isoform 6 of Hereditary hemochromatosis protein OS=Homo sapiens GN=HFE                                                |           |        |
| Q30201-7                   | HFE_HUMAN Isoform 7 of Hereditary hemochromatosis protein OS=Homo sapiens GN=HFE                                                |           |        |
| Q30201-8                   | HFE_HUMAN Isoform 8 of Hereditary hemochromatosis protein OS=Homo sapiens GN=HFE                                                |           |        |
| Q31610                     | 1B81_HUMAN HLA class I histocompatibility antigen, B-81 alpha chain OS=Homo sapiens GN=HLA-B PE=1 SV=1                          |           | 363.46 |
| Q31612                     | 1B73_HUMAN HLA class I histocompatibility antigen, B-73 alpha chain OS=Homo sapiens GN=HLA-B PE=1 SV=1                          |           | 368.35 |
| Q32M45                     | ANO4_HUMAN Anoctamin-4 OS=Homo sapiens GN=ANO4 PE=2 SV=1                                                                        |           |        |
| Q32M45-2                   | ANO4_HUMAN Isoform 2 of Anoctamin-4 OS=Homo sapiens GN=ANO4                                                                     |           |        |
| Q32M84-2                   | BTBDG_HUMAN Isoform 2 of BTB/POZ domain-containing protein 16 OS=Homo sapiens GN=BTBD16                                         |           |        |
| Q32MK0                     | MYLK3_HUMAN Putative myosin light chain kinase 3 OS=Homo sapiens GN=MYLK3 PE=2 SV=3                                             |           | 44.43  |
| Q32MZ4                     | LRRF1_HUMAN Leucine-rich repeat flightless-interacting protein 1 OS=Homo sapiens GN=LRRFIP1 PE=1 SV=2                           |           | 94.2   |
| Q32MZ4-2                   | LRRF1_HUMAN Isoform 2 of Leucine-rich repeat flightless-interacting protein 1 OS=Homo sapiens GN=LRRFIP1                        |           | 92.4   |
| Q32MZ4-2;Q32MZ4-3;Q32MZ4-3 | LRRF1_HUMAN Isoform 2 of Leucine-rich repeat flightless-interacting protein 1 OS=Homo sapiens GN=LRRFIP1;>sp Q32MZ4-3 LRR       | 3.13E-256 |        |
| Q32MZ4-3                   | LRRF1_HUMAN Isoform 3 of Leucine-rich repeat flightless-interacting protein 1 OS=Homo sapiens GN=LRRFIP1                        |           | 83.33  |
| Q32MZ4;Q32MZ4-2;Q32MZ4-3   | LRRF1_HUMAN Leucine-rich repeat flightless-interacting protein 1 OS=Homo sapiens GN=LRRFIP1 PE=1 SV=2;>sp Q32MZ4-2 LRRF1        | 1.62E-162 |        |
| Q32NB8                     | PGPS1_HUMAN CDP-diacylglycerol--glycerol-3-phosphate 3-phosphatidyltransferase, mitochondrial OS=Homo sapiens GN=PGS1 PE=2 SV=1 |           |        |
| Q32P28                     | P3H1_HUMAN Prolyl 3-hydroxylase 1 OS=Homo sapiens GN=LEPRE1 PE=1 SV=2                                                           |           | 394.67 |
| Q32P28-2                   | P3H1_HUMAN Isoform 2 of Prolyl 3-hydroxylase 1 OS=Homo sapiens GN=LEPRE1                                                        |           | 167.23 |
| Q32P28-3                   | P3H1_HUMAN Isoform 3 of Prolyl 3-hydroxylase 1 OS=Homo sapiens GN=LEPRE1                                                        |           | 389.53 |
| Q32P28;Q32P28-3            | P3H1_HUMAN Prolyl 3-hydroxylase 1 OS=Homo sapiens GN=LEPRE1 PE=1 SV=2;>sp Q32P28-3 P3H1_HUMAN Isoform 3 of Prolyl 3-h           | 3.10E-121 |        |
| Q32P51                     | RA1L2_HUMAN Heterogeneous nuclear ribonucleoprotein A1-like 2 OS=Homo sapiens GN=HNRNPA1L2 PE=2 SV=2                            |           | 859.38 |

|                        |                                                                                                                          |            |  |
|------------------------|--------------------------------------------------------------------------------------------------------------------------|------------|--|
| Q38SD2                 | LRRK1_HUMAN Leucine-rich repeat serine/threonine-protein kinase 1 OS=Homo sapiens GN=LRRK1 PE=1 SV=3                     | 4.18E-14   |  |
| Q3B726                 | RPA43_HUMAN DNA-directed RNA polymerase I subunit RPA43 OS=Homo sapiens GN=TWISTNB PE=1 SV=1                             |            |  |
| Q3B7T1                 | EDRF1_HUMAN Erythroid differentiation-related factor 1 OS=Homo sapiens GN=EDRF1 PE=1 SV=1                                |            |  |
| Q3B7T1-3               | EDRF1_HUMAN Isoform 2 of Erythroid differentiation-related factor 1 OS=Homo sapiens GN=EDRF1                             |            |  |
| Q3B7T1-4               | EDRF1_HUMAN Isoform 3 of Erythroid differentiation-related factor 1 OS=Homo sapiens GN=EDRF1                             |            |  |
| Q3B7T1-5               | EDRF1_HUMAN Isoform 4 of Erythroid differentiation-related factor 1 OS=Homo sapiens GN=EDRF1                             |            |  |
| Q3B8N5                 | PROX2_HUMAN Prospero homeobox protein 2 OS=Homo sapiens GN=PROX2 PE=2 SV=3                                               |            |  |
| Q3B8N5-2               | PROX2_HUMAN Isoform 2 of Prospero homeobox protein 2 OS=Homo sapiens GN=PROX2                                            |            |  |
| Q3C1V8                 | BSH_HUMAN Brain-specific homeobox protein homolog OS=Homo sapiens GN=BSX PE=2 SV=2                                       |            |  |
| Q3KNS1                 | PTHD3_HUMAN Patched domain-containing protein 3 OS=Homo sapiens GN=PTCHD3 PE=1 SV=2                                      |            |  |
| Q3KNS6                 | ZN829_HUMAN Zinc finger protein 829 OS=Homo sapiens GN=ZNF829 PE=2 SV=1                                                  |            |  |
| Q3KNS6-2               | ZN829_HUMAN Isoform 2 of Zinc finger protein 829 OS=Homo sapiens GN=ZNF829                                               |            |  |
| Q3KQU3                 | MA7D1_HUMAN MAP7 domain-containing protein 1 OS=Homo sapiens GN=MAP7D1 PE=1 SV=1                                         | 38.4       |  |
| Q3KQU3-2               | MA7D1_HUMAN Isoform 2 of MAP7 domain-containing protein 1 OS=Homo sapiens GN=MAP7D1                                      | 38.4       |  |
| Q3KQU3-3               | MA7D1_HUMAN Isoform 3 of MAP7 domain-containing protein 1 OS=Homo sapiens GN=MAP7D1                                      | 32.83      |  |
| Q3KQU3-4               | MA7D1_HUMAN Isoform 4 of MAP7 domain-containing protein 1 OS=Homo sapiens GN=MAP7D1                                      | 38.4       |  |
| Q3KQU3;D3DPS3;D3DPS4   | MA7D1_HUMAN MAP7 domain-containing protein 1 OS=Homo sapiens GN=MAP7D1 PE=1 SV=1;>tr D3DPS3 D3DPS3_HUMAN Arginin         | 5.68E-23   |  |
| Q3KQV9                 | UAP1L_HUMAN UDP-N-acetylhexosamine pyrophosphorylase-like protein 1 OS=Homo sapiens GN=UAP1L1 PE=2 SV=2                  | 2.92E-12   |  |
| Q3KR37                 | GRM1B_HUMAN GRAM domain-containing protein 1B OS=Homo sapiens GN=GRAMD1B PE=1 SV=1                                       |            |  |
| Q3L8U1                 | CHD9_HUMAN Chromodomain-helicase-DNA-binding protein 9 OS=Homo sapiens GN=CHD9 PE=1 SV=2                                 | 81.71      |  |
| Q3L8U1-2               | CHD9_HUMAN Isoform 2 of Chromodomain-helicase-DNA-binding protein 9 OS=Homo sapiens GN=CHD9                              | 81.71      |  |
| Q3L8U1-3               | CHD9_HUMAN Isoform 3 of Chromodomain-helicase-DNA-binding protein 9 OS=Homo sapiens GN=CHD9                              | 81.71      |  |
| Q3LXA3                 | DHAK_HUMAN Bifunctional ATP-dependent dihydroxyacetone kinase/FAD-AMP lyase (cyclizing) OS=Homo sapiens GN=DAK PE=1 SV=  | 7.52E-119  |  |
| Q3MHD2                 | LSM12_HUMAN Protein LSM12 homolog OS=Homo sapiens GN=LSM12 PE=1 SV=2                                                     | 131.39     |  |
| Q3MHD2-2               | LSM12_HUMAN Isoform 2 of Protein LSM12 homolog OS=Homo sapiens GN=LSM12                                                  | 131.39     |  |
| Q3MHD2-2;Q3MHD2        | 2 LSM12_HUMAN Isoform 2 of Protein LSM12 homolog OS=Homo sapiens GN=LSM12;>sp Q3MHD2 LSM12_HUMAN Protein LSM12 hc        | 4.13E-21   |  |
| Q3MIR4                 | CC50B_HUMAN Cell cycle control protein 50B OS=Homo sapiens GN=TMEM30B PE=2 SV=1                                          |            |  |
| Q3MJ40                 | C144B_HUMAN Coiled-coil domain-containing protein 144B OS=Homo sapiens GN=CCDC144B PE=2 SV=1                             |            |  |
| Q3MJ40-2               | C144B_HUMAN Isoform 2 of Coiled-coil domain-containing protein 144B OS=Homo sapiens GN=CCDC144B                          |            |  |
| Q3SXM5                 | HSDL1_HUMAN Inactive hydroxysteroid dehydrogenase-like protein 1 OS=Homo sapiens GN=HSDL1 PE=1 SV=3                      | 0.00022061 |  |
| Q3SY69                 | AL1L2_HUMAN Aldehyde dehydrogenase family 1 member L2, mitochondrial OS=Homo sapiens GN=ALDH1L2 PE=1 SV=2                | 1.67E-11   |  |
| Q3SY84                 | K2C71_HUMAN Keratin, type II cytoskeletal 71 OS=Homo sapiens GN=KRT71 PE=1 SV=3                                          | 246.28     |  |
| Q3SY89                 | EA3L1_HUMAN RNA polymerase II transcription factor SIII subunit A3-like-1 OS=Homo sapiens GN=TCEB3CL PE=2 SV=1           |            |  |
| Q3SYG4                 | PTHB1_HUMAN Protein PTHB1 OS=Homo sapiens GN=BBS9 PE=1 SV=1                                                              |            |  |
| Q3SYG4-2               | PTHB1_HUMAN Isoform 2 of Protein PTHB1 OS=Homo sapiens GN=BBS9                                                           |            |  |
| Q3SYG4-3               | PTHB1_HUMAN Isoform 3 of Protein PTHB1 OS=Homo sapiens GN=BBS9                                                           |            |  |
| Q3SYG4-4               | PTHB1_HUMAN Isoform 4 of Protein PTHB1 OS=Homo sapiens GN=BBS9                                                           |            |  |
| Q3SYG4-5               | PTHB1_HUMAN Isoform 5 of Protein PTHB1 OS=Homo sapiens GN=BBS9                                                           |            |  |
| Q3SYG4-6               | PTHB1_HUMAN Isoform 6 of Protein PTHB1 OS=Homo sapiens GN=BBS9                                                           |            |  |
| Q3T8J9                 | GON4L_HUMAN GON-4-like protein OS=Homo sapiens GN=GON4L PE=1 SV=1                                                        |            |  |
| Q3T8J9-2               | GON4L_HUMAN Isoform 2 of GON-4-like protein OS=Homo sapiens GN=GON4L                                                     |            |  |
| Q3T8J9-3               | GON4L_HUMAN Isoform 3 of GON-4-like protein OS=Homo sapiens GN=GON4L                                                     |            |  |
| Q3T906                 | GNPTA_HUMAN N-acetylglucosamine-1-phosphotransferase subunits alpha/beta OS=Homo sapiens GN=GNPTAB PE=1 SV=1             |            |  |
| Q3T906-2               | GNPTA_HUMAN Isoform 2 of N-acetylglucosamine-1-phosphotransferase subunits alpha/beta OS=Homo sapiens GN=GNPTAB          |            |  |
| Q3V6T2                 | GRDN_HUMAN Girdin OS=Homo sapiens GN=CCDC88A PE=1 SV=2                                                                   |            |  |
| Q3V6T2-2               | GRDN_HUMAN Isoform 2 of Girdin OS=Homo sapiens GN=CCDC88A                                                                |            |  |
| Q3V6T2-3               | GRDN_HUMAN Isoform 3 of Girdin OS=Homo sapiens GN=CCDC88A                                                                |            |  |
| Q3V6T2-4               | GRDN_HUMAN Isoform 4 of Girdin OS=Homo sapiens GN=CCDC88A                                                                |            |  |
| Q3V6T2;Q3V6T2-2;Q3V6T  | GRDN_HUMAN Girdin OS=Homo sapiens GN=CCDC88A PE=1 SV=2;>sp Q3V6T2-2 GRDN_HUMAN Isoform 2 of Girdin OS=Homo sapi          | 8.54E-15   |  |
| Q3YEC7-2;Q3YEC7;Q3YEC2 | PARF_HUMAN Isoform 2 of Putative GTP-binding protein Parf OS=Homo sapiens GN=PARF;>sp Q3YEC7 PARF_HUMAN Putative GTP-    | 1.68E-66   |  |
| Q3ZAQ7                 | VMA21_HUMAN Vacuolar ATPase assembly integral membrane protein VMA21 OS=Homo sapiens GN=VMA21 PE=1 SV=1                  |            |  |
| Q3ZAQ7-2               | VMA21_HUMAN Isoform 2 of Vacuolar ATPase assembly integral membrane protein VMA21 OS=Homo sapiens GN=VMA21               |            |  |
| Q3ZAQ7-2;Q3ZAQ7        | 2 VMA21_HUMAN Isoform 2 of Vacuolar ATPase assembly integral membrane protein VMA21 OS=Homo sapiens GN=VMA21;>sp Q3Z/    | 3.67E-38   |  |
| Q3ZAQ7;Q3ZAQ7-2        | VMA21_HUMAN Vacuolar ATPase assembly integral membrane protein VMA21 OS=Homo sapiens GN=VMA21 PE=1 SV=1;>sp Q3ZAQ7       | 1.80E-15   |  |
| Q3ZCM7                 | TBB8_HUMAN Tubulin beta-8 chain OS=Homo sapiens GN=TUBB8 PE=1 SV=2                                                       | 844.07     |  |
| Q3ZCQ8                 | TIM50_HUMAN Mitochondrial import inner membrane translocase subunit TIM50 OS=Homo sapiens GN=TIMM50 PE=1 SV=2            | 146.16     |  |
| Q3ZCQ8-2               | TIM50_HUMAN Isoform 2 of Mitochondrial import inner membrane translocase subunit TIM50 OS=Homo sapiens GN=TIMM50         | 146.16     |  |
| Q3ZCQ8-2;Q3ZCQ8        | 2 TIM50_HUMAN Isoform 2 of Mitochondrial import inner membrane translocase subunit TIM50 OS=Homo sapiens GN=TIMM50;>sp C | 4.61E-18   |  |
| Q460N5;Q460N5-1;Q460N  | PAR14_HUMAN Poly [ADP-ribose] polymerase 14 OS=Homo sapiens GN=PARP14 PE=1 SV=3;>sp Q460N5-1 PAR14_HUMAN Isoform         | 1.43E-31   |  |
| Q494R4                 | CC153_HUMAN Coiled-coil domain-containing protein 153 OS=Homo sapiens GN=CCDC153 PE=2 SV=2                               |            |  |
| Q494R4-2               | CC153_HUMAN Isoform 2 of Coiled-coil domain-containing protein 153 OS=Homo sapiens GN=CCDC153                            |            |  |

|                        |                                                                                                                        |            |
|------------------------|------------------------------------------------------------------------------------------------------------------------|------------|
| Q495T6                 | MMEL1_HUMAN Membrane metallo-endopeptidase-like 1 OS=Homo sapiens GN=MMEL1 PE=1 SV=2                                   |            |
| Q495T6-2               | MMEL1_HUMAN Isoform 2 of Membrane metallo-endopeptidase-like 1 OS=Homo sapiens GN=MMEL1                                |            |
| Q495T6-3               | MMEL1_HUMAN Isoform 3 of Membrane metallo-endopeptidase-like 1 OS=Homo sapiens GN=MMEL1                                |            |
| Q495X7                 | TRI60_HUMAN Tripartite motif-containing protein 60 OS=Homo sapiens GN=TRIM60 PE=2 SV=2                                 |            |
| Q496J9                 | SV2C_HUMAN Synaptic vesicle glycoprotein 2C OS=Homo sapiens GN=SV2C PE=2 SV=1                                          | 27.7       |
| Q496Y0                 | LONF3_HUMAN LON peptidase N-terminal domain and RING finger protein 3 OS=Homo sapiens GN=LONRF3 PE=1 SV=1              |            |
| Q496Y0-2               | LONF3_HUMAN Isoform 2 of LON peptidase N-terminal domain and RING finger protein 3 OS=Homo sapiens GN=LONRF3           |            |
| Q496Y0-3               | LONF3_HUMAN Isoform 3 of LON peptidase N-terminal domain and RING finger protein 3 OS=Homo sapiens GN=LONRF3           |            |
| Q49A26                 | GLYR1_HUMAN Putative oxidoreductase GLYR1 OS=Homo sapiens GN=GLYR1 PE=1 SV=3                                           |            |
| Q49A26-2               | GLYR1_HUMAN Isoform 2 of Putative oxidoreductase GLYR1 OS=Homo sapiens GN=GLYR1                                        |            |
| Q49A26-3               | GLYR1_HUMAN Isoform 3 of Putative oxidoreductase GLYR1 OS=Homo sapiens GN=GLYR1                                        |            |
| Q49A26-4               | GLYR1_HUMAN Isoform 4 of Putative oxidoreductase GLYR1 OS=Homo sapiens GN=GLYR1                                        |            |
| Q49A26-5               | GLYR1_HUMAN Isoform 5 of Putative oxidoreductase GLYR1 OS=Homo sapiens GN=GLYR1                                        |            |
| Q49A26;Q49A26-3;Q49A26 | GLYR1_HUMAN Putative oxidoreductase GLYR1 OS=Homo sapiens GN=GLYR1 PE=1 SV=3;>sp Q49A26-3 GLYR1_HUMAN Isoform 3 of     | 4.02E-05   |
| Q49AJ0                 | F135B_HUMAN Protein FAM135B OS=Homo sapiens GN=FAM135B PE=2 SV=2                                                       |            |
| Q49AJ0-2               | F135B_HUMAN Isoform 2 of Protein FAM135B OS=Homo sapiens GN=FAM135B                                                    |            |
| Q49AJ0-3               | F135B_HUMAN Isoform 3 of Protein FAM135B OS=Homo sapiens GN=FAM135B                                                    |            |
| Q49AJ0-4               | F135B_HUMAN Isoform 4 of Protein FAM135B OS=Homo sapiens GN=FAM135B                                                    |            |
| Q49MG5                 | MAP9_HUMAN Microtubule-associated protein 9 OS=Homo sapiens GN=MAP9 PE=1 SV=3                                          |            |
| Q4AC94                 | C2CD3_HUMAN C2 domain-containing protein 3 OS=Homo sapiens GN=C2CD3 PE=1 SV=4                                          | 59.42      |
| Q4AC94-1               | C2CD3_HUMAN Isoform 1 of C2 domain-containing protein 3 OS=Homo sapiens GN=C2CD3                                       | 48.61      |
| Q4AC94-2               | C2CD3_HUMAN Isoform 2 of C2 domain-containing protein 3 OS=Homo sapiens GN=C2CD3                                       | 40.52      |
| Q4AC94-3               | C2CD3_HUMAN Isoform 3 of C2 domain-containing protein 3 OS=Homo sapiens GN=C2CD3                                       | 48.61      |
| Q4AC94-4               | C2CD3_HUMAN Isoform 4 of C2 domain-containing protein 3 OS=Homo sapiens GN=C2CD3                                       | 40.52      |
| Q4ADV7                 | RIC1_HUMAN Protein RIC1 homolog OS=Homo sapiens GN=KIAA1432 PE=1 SV=2                                                  |            |
| Q4ADV7-2               | RIC1_HUMAN Isoform 2 of Protein RIC1 homolog OS=Homo sapiens GN=KIAA1432                                               |            |
| Q4FZB7                 | SV421_HUMAN Histone-lysine N-methyltransferase SUV420H1 OS=Homo sapiens GN=SUV420H1 PE=1 SV=4                          |            |
| Q4FZB7-2               | SV421_HUMAN Isoform 2 of Histone-lysine N-methyltransferase SUV420H1 OS=Homo sapiens GN=SUV420H1                       |            |
| Q4FZB7-4               | SV421_HUMAN Isoform 3 of Histone-lysine N-methyltransferase SUV420H1 OS=Homo sapiens GN=SUV420H1                       |            |
| Q4G0F5                 | VP26B_HUMAN Vacuolar protein sorting-associated protein 26B OS=Homo sapiens GN=VPS26B PE=1 SV=2                        | 49.33      |
| Q4G0J3                 | LARP7_HUMAN La-related protein 7 OS=Homo sapiens GN=LARP7 PE=1 SV=1                                                    | 2.61E-16   |
| Q4G0N4                 | CE033_HUMAN UPF0465 protein C5orf33 OS=Homo sapiens GN=C5orf33 PE=1 SV=2                                               |            |
| Q4G0N4-2               | CE033_HUMAN Isoform 2 of UPF0465 protein C5orf33 OS=Homo sapiens GN=C5orf33                                            |            |
| Q4G0N4-3               | CE033_HUMAN Isoform 3 of UPF0465 protein C5orf33 OS=Homo sapiens GN=C5orf33                                            |            |
| Q4G0N4;Q4G0N4-2;B7Z8   | CE033_HUMAN UPF0465 protein C5orf33 OS=Homo sapiens GN=C5orf33 PE=1 SV=2;>sp Q4G0N4-2 CE033_HUMAN Isoform 2 of UPI     | 4.55E-58   |
| Q4G0N4;Q4G0N4-2;Q4G0   | NAKD1_HUMAN NAD kinase domain-containing protein 1 OS=Homo sapiens GN=NADKD1 PE=1 SV=2;>sp Q4G0N4-2 NAKD1_HUMAN        | 1.74E-41   |
| Q4G0X4                 | KCD21_HUMAN BTB/POZ domain-containing protein KCTD21 OS=Homo sapiens GN=KCTD21 PE=2 SV=1                               | 0.00015348 |
| Q4G0X9                 | CCD40_HUMAN Coiled-coil domain-containing protein 40 OS=Homo sapiens GN=CCDC40 PE=2 SV=2                               |            |
| Q4G0X9-2               | CCD40_HUMAN Isoform 2 of Coiled-coil domain-containing protein 40 OS=Homo sapiens GN=CCDC40                            |            |
| Q4G0X9-3               | CCD40_HUMAN Isoform 3 of Coiled-coil domain-containing protein 40 OS=Homo sapiens GN=CCDC40                            |            |
| Q4G0X9-4               | CCD40_HUMAN Isoform 4 of Coiled-coil domain-containing protein 40 OS=Homo sapiens GN=CCDC40                            |            |
| Q4G0Z9-4               | CH045_HUMAN Isoform 4 of Uncharacterized protein C8orf45 OS=Homo sapiens GN=C8orf45                                    |            |
| Q4G148                 | GXLT1_HUMAN Glucoside xylosyltransferase 1 OS=Homo sapiens GN=GXYLT1 PE=1 SV=2                                         |            |
| Q4G148-2               | GXLT1_HUMAN Isoform 2 of Glucoside xylosyltransferase 1 OS=Homo sapiens GN=GXYLT1                                      |            |
| Q4G176                 | ACSF3_HUMAN Acyl-CoA synthetase family member 3, mitochondrial OS=Homo sapiens GN=ACSF3 PE=1 SV=3                      |            |
| Q4G176-2               | ACSF3_HUMAN Isoform 2 of Acyl-CoA synthetase family member 3, mitochondrial OS=Homo sapiens GN=ACSF3                   |            |
| Q4G176;Q4G176-2        | ACSF3_HUMAN Acyl-CoA synthetase family member 3, mitochondrial OS=Homo sapiens GN=ACSF3 PE=1 SV=3;>sp Q4G176-2 ACSF    | 4.68E-28   |
| Q4G1C9                 | GRPL2_HUMAN GLIPR1-like protein 2 OS=Homo sapiens GN=GLIPR1L2 PE=2 SV=2                                                |            |
| Q4G1C9-2               | GRPL2_HUMAN Isoform 2 of GLIPR1-like protein 2 OS=Homo sapiens GN=GLIPR1L2                                             |            |
| Q4G1C9-3               | GRPL2_HUMAN Isoform 3 of GLIPR1-like protein 2 OS=Homo sapiens GN=GLIPR1L2                                             |            |
| Q4G1C9-4               | GRPL2_HUMAN Isoform 4 of GLIPR1-like protein 2 OS=Homo sapiens GN=GLIPR1L2                                             |            |
| Q4G1C9-5               | GRPL2_HUMAN Isoform 5 of GLIPR1-like protein 2 OS=Homo sapiens GN=GLIPR1L2                                             |            |
| Q4G1C9-6               | GRPL2_HUMAN Isoform 6 of GLIPR1-like protein 2 OS=Homo sapiens GN=GLIPR1L2                                             |            |
| Q4KMQ2                 | ANO6_HUMAN Anoctamin-6 OS=Homo sapiens GN=ANO6 PE=1 SV=2                                                               | 30.65      |
| Q4KWH8                 | PLCH1_HUMAN 1-phosphatidylinositol-4,5-bisphosphate phosphodiesterase eta-1 OS=Homo sapiens GN=PLCH1 PE=1 SV=1         | 95.9       |
| Q4KWH8-2               | PLCH1_HUMAN Isoform 2 of 1-phosphatidylinositol-4,5-bisphosphate phosphodiesterase eta-1 OS=Homo sapiens GN=PLCH1      | 84.41      |
| Q4KWH8-3               | PLCH1_HUMAN Isoform 3 of 1-phosphatidylinositol-4,5-bisphosphate phosphodiesterase eta-1 OS=Homo sapiens GN=PLCH1      | 87.23      |
| Q4KWH8-4               | PLCH1_HUMAN Isoform 4 of 1-phosphatidylinositol-4,5-bisphosphate phosphodiesterase eta-1 OS=Homo sapiens GN=PLCH1      | 89.15      |
| Q4KWH8;Q4KWH8-2;Q4K    | PLCH1_HUMAN 1-phosphatidylinositol-4,5-bisphosphate phosphodiesterase eta-1 OS=Homo sapiens GN=PLCH1 PE=1 SV=1;>sp Q4K | 2.83E-07   |
| Q4L180                 | FIL1L_HUMAN Filamin A-interacting protein 1-like OS=Homo sapiens GN=FILIP1L PE=1 SV=2                                  |            |
| Q4L180-2               | FIL1L_HUMAN Isoform 2 of Filamin A-interacting protein 1-like OS=Homo sapiens GN=FILIP1L                               |            |

|                       |                                                                                                                                      |            |
|-----------------------|--------------------------------------------------------------------------------------------------------------------------------------|------------|
| Q4L180-3              | FIL1L_HUMAN Isoform 3 of Filamin A-interacting protein 1-like OS=Homo sapiens GN=FILIP1L                                             |            |
| Q4L180-4              | FIL1L_HUMAN Isoform 4 of Filamin A-interacting protein 1-like OS=Homo sapiens GN=FILIP1L                                             |            |
| Q4L180-5              | FIL1L_HUMAN Isoform 5 of Filamin A-interacting protein 1-like OS=Homo sapiens GN=FILIP1L                                             |            |
| Q4L180-6              | FIL1L_HUMAN Isoform 6 of Filamin A-interacting protein 1-like OS=Homo sapiens GN=FILIP1L                                             |            |
| Q4L180-7              | FIL1L_HUMAN Isoform 7 of Filamin A-interacting protein 1-like OS=Homo sapiens GN=FILIP1L                                             |            |
| Q4L235                | ACSF4_HUMAN Acyl-CoA synthetase family member 4 OS=Homo sapiens GN=AASDH PE=2 SV=3                                                   | 42.01      |
| Q4L235-2              | ACSF4_HUMAN Isoform 2 of Acyl-CoA synthetase family member 4 OS=Homo sapiens GN=AASDH                                                | 42.01      |
| Q4L235-3              | ACSF4_HUMAN Isoform 3 of Acyl-CoA synthetase family member 4 OS=Homo sapiens GN=AASDH                                                | 42.01      |
| Q4L235-4              | ACSF4_HUMAN Isoform 4 of Acyl-CoA synthetase family member 4 OS=Homo sapiens GN=AASDH                                                | 42.01      |
| Q4LDE5                | SVEP1_HUMAN Sushi, von Willebrand factor type A, EGF and pentraxin domain-containing protein 1 OS=Homo sapiens GN=SVEP1 PE=1 SV=3    | 18.52      |
| Q4LDE5-3              | SVEP1_HUMAN Isoform 3 of Sushi, von Willebrand factor type A, EGF and pentraxin domain-containing protein 1 OS=Homo sapiens GN=SVEP1 | 18.52      |
| Q4LEZ3                | AARD_HUMAN Alanine and arginine-rich domain-containing protein OS=Homo sapiens GN=AARD PE=2 SV=1                                     | 31.98      |
| Q4UJ75                | A20A4_HUMAN Ankyrin repeat domain-containing protein 20A4 OS=Homo sapiens GN=ANKRD20A4 PE=2 SV=1                                     |            |
| Q4V328;Q4V328-4;Q4V32 | GRAP1_HUMAN GRIP1-associated protein 1 OS=Homo sapiens GN=GRIPAP1 PE=1 SV=1;>sp Q4V328-4 GRAP1_HUMAN Isoform 4 of                    | 2.64E-18   |
| Q4VC05                | BCL7A_HUMAN B-cell CLL/lymphoma 7 protein family member A OS=Homo sapiens GN=BCL7A PE=1 SV=1                                         |            |
| Q4VC05-2              | BCL7A_HUMAN Isoform 2 of B-cell CLL/lymphoma 7 protein family member A OS=Homo sapiens GN=BCL7A                                      |            |
| Q4VC31                | CCD58_HUMAN Coiled-coil domain-containing protein 58 OS=Homo sapiens GN=CCDC58 PE=1 SV=1                                             | 171.86     |
| Q4VXU2                | PAP1L_HUMAN Polyadenylate-binding protein 1-like OS=Homo sapiens GN=PABPC1L PE=2 SV=1                                                | 342.78     |
| Q4ZG55-2              | GREB1_HUMAN Isoform 2 of Protein GREB1 OS=Homo sapiens GN=GREB1                                                                      | 1.34       |
| Q4ZG55-3              | GREB1_HUMAN Isoform 3 of Protein GREB1 OS=Homo sapiens GN=GREB1                                                                      | 1.34       |
| Q4ZHG4                | FNDC1_HUMAN Fibronectin type III domain-containing protein 1 OS=Homo sapiens GN=FNDC1 PE=1 SV=4                                      |            |
| Q4ZHG4-2              | FNDC1_HUMAN Isoform 2 of Fibronectin type III domain-containing protein 1 OS=Homo sapiens GN=FNDC1                                   |            |
| Q504Q3                | PAN2_HUMAN PAB-dependent poly(A)-specific ribonuclease subunit 2 OS=Homo sapiens GN=PAN2 PE=1 SV=3                                   |            |
| Q504Q3-2              | PAN2_HUMAN Isoform 2 of PAB-dependent poly(A)-specific ribonuclease subunit 2 OS=Homo sapiens GN=PAN2                                |            |
| Q504Q3-3              | PAN2_HUMAN Isoform 3 of PAB-dependent poly(A)-specific ribonuclease subunit 2 OS=Homo sapiens GN=PAN2                                |            |
| Q52LJ0                | FA98B_HUMAN Protein FAM98B OS=Homo sapiens GN=FAM98B PE=1 SV=1                                                                       | 83.28      |
| Q52LW3                | RHG29_HUMAN Rho GTPase-activating protein 29 OS=Homo sapiens GN=ARHGAP29 PE=1 SV=2                                                   |            |
| Q52LW3-2              | RHG29_HUMAN Isoform 2 of Rho GTPase-activating protein 29 OS=Homo sapiens GN=ARHGAP29                                                |            |
| Q52LW3;Q52LW3-2       | RHG29_HUMAN Rho GTPase-activating protein 29 OS=Homo sapiens GN=ARHGAP29 PE=1 SV=2;>sp Q52LW3-2 RHG29_HUMAN Isof                     | 1.29E-43   |
| Q52M75                | CE027_HUMAN Putative uncharacterized protein C5orf27 OS=Homo sapiens GN=C5orf27 PE=2 SV=2                                            | 23.03      |
| Q53EL6                | PDCD4_HUMAN Programmed cell death protein 4 OS=Homo sapiens GN=PDCD4 PE=1 SV=2                                                       | 0          |
| Q53EP0;Q53EP0-2       | FND3B_HUMAN Fibronectin type III domain-containing protein 3B OS=Homo sapiens GN=FND3B PE=1 SV=2;>sp Q53EP0-2 FND3B_                 | 1.12E-05   |
| Q53EZ4;Q53EZ4-2       | CEP55_HUMAN Centrosomal protein of 55 kDa OS=Homo sapiens GN=CEP55 PE=1 SV=3;>sp Q53EZ4-2 CEP55_HUMAN Isoform 2 of                   | 1.22E-51   |
| Q53F19                | CQ085_HUMAN Uncharacterized protein C17orf85 OS=Homo sapiens GN=C17orf85 PE=1 SV=2                                                   |            |
| Q53F19-2              | CQ085_HUMAN Isoform 2 of Uncharacterized protein C17orf85 OS=Homo sapiens GN=C17orf85                                                |            |
| Q53F19;Q53F19-2       | CQ085_HUMAN Uncharacterized protein C17orf85 OS=Homo sapiens GN=C17orf85 PE=1 SV=2;>sp Q53F19-2 CQ085_HUMAN Isoform                  | 0.00024906 |
| Q53FA7;Q53FA7-2       | QORX_HUMAN Quinone oxidoreductase PIG3 OS=Homo sapiens GN=TP53I3 PE=1 SV=2;>sp Q53FA7-2 QORX_HUMAN Isoform 2 of Q                    | 5.15E-14   |
| Q53FE4                | CD017_HUMAN Uncharacterized protein C4orf17 OS=Homo sapiens GN=C4orf17 PE=2 SV=3                                                     |            |
| Q53FT3                | CK073_HUMAN Uncharacterized protein C11orf73 OS=Homo sapiens GN=C11orf73 PE=1 SV=2                                                   | 7.16E-18   |
| Q53FV1                | ORML2_HUMAN ORM1-like protein 2 OS=Homo sapiens GN=ORMDL2 PE=2 SV=2                                                                  |            |
| Q53GA4                | PHLA2_HUMAN Pleckstrin homology-like domain family A member 2 OS=Homo sapiens GN=PHLDA2 PE=1 SV=2                                    | 34.57      |
| Q53GD3                | CTL4_HUMAN Choline transporter-like protein 4 OS=Homo sapiens GN=SLC44A4 PE=2 SV=2                                                   |            |
| Q53GD3-2              | CTL4_HUMAN Isoform 2 of Choline transporter-like protein 4 OS=Homo sapiens GN=SLC44A4                                                |            |
| Q53GD3;B4DU94;A2BED4  | CTL4_HUMAN Choline transporter-like protein 4 OS=Homo sapiens GN=SLC44A4 PE=2 SV=2;>tr B4DU94 B4DU94_HUMAN cDNA FLJ                  | 4.67E-07   |
| Q53GG5;Q53GG5-2;Q53G  | PDLI3_HUMAN PDZ and LIM domain protein 3 OS=Homo sapiens GN=PDLIM3 PE=2 SV=1;>sp Q53GG5-2 PDLI3_HUMAN Isoform 2 of                   | 1.98E-27   |
| Q53GL7                | PAR10_HUMAN Poly [ADP-ribose] polymerase 10 OS=Homo sapiens GN=PARP10 PE=1 SV=2                                                      |            |
| Q53GQ0                | DHB12_HUMAN Estradiol 17-beta-dehydrogenase 12 OS=Homo sapiens GN=HSD17B12 PE=1 SV=2                                                 | 726.21     |
| Q53GS7                | GLE1_HUMAN Nucleoporin GLE1 OS=Homo sapiens GN=GLE1 PE=1 SV=2                                                                        |            |
| Q53GS7-2              | GLE1_HUMAN Isoform 2 of Nucleoporin GLE1 OS=Homo sapiens GN=GLE1                                                                     |            |
| Q53GS9                | SNUT2_HUMAN U4/U6.U5 tri-snRNP-associated protein 2 OS=Homo sapiens GN=USP39 PE=1 SV=2                                               | 366.81     |
| Q53H12                | AGK_HUMAN Acylglycerol kinase, mitochondrial OS=Homo sapiens GN=AGK PE=1 SV=2                                                        | 112.35     |
| Q53H47                | SETMR_HUMAN Histone-lysine N-methyltransferase SETMAR OS=Homo sapiens GN=SETMAR PE=1 SV=1                                            |            |
| Q53H47-2              | SETMR_HUMAN Isoform 2 of Histone-lysine N-methyltransferase SETMAR OS=Homo sapiens GN=SETMAR                                         |            |
| Q53H82                | LACB2_HUMAN Beta-lactamase-like protein 2 OS=Homo sapiens GN=LACTB2 PE=1 SV=2                                                        | 88.58      |
| Q53H96                | P5CR3_HUMAN Pyrroline-5-carboxylate reductase 3 OS=Homo sapiens GN=PYCRL PE=1 SV=2                                                   | 7.39E-05   |
| Q53HL2                | BOREA_HUMAN Borealin OS=Homo sapiens GN=CDCA8 PE=1 SV=2                                                                              |            |
| Q53S58                | TM177_HUMAN Transmembrane protein 177 OS=Homo sapiens GN=TMEM177 PE=2 SV=1                                                           |            |
| Q53TN4                | CYBR1_HUMAN Cytochrome b reductase 1 OS=Homo sapiens GN=CYBRD1 PE=1 SV=1                                                             | 75.23      |
| Q562E7                | WDR81_HUMAN WD repeat-containing protein 81 OS=Homo sapiens GN=WDR81 PE=2 SV=1                                                       |            |
| Q562R1                | ACTBL_HUMAN Beta-actin-like protein 2 OS=Homo sapiens GN=ACTBL2 PE=1 SV=2                                                            | 562.21     |
| Q567U6                | CCD93_HUMAN Coiled-coil domain-containing protein 93 OS=Homo sapiens GN=CCDC93 PE=1 SV=2                                             | 53.66      |



|                                                                                                                                                                                                                                                                 |                                                                                                                                                                                                                              |          |        |
|-----------------------------------------------------------------------------------------------------------------------------------------------------------------------------------------------------------------------------------------------------------------|------------------------------------------------------------------------------------------------------------------------------------------------------------------------------------------------------------------------------|----------|--------|
| Q56NI9                                                                                                                                                                                                                                                          | ESCO2_HUMAN N-acetyltransferase ESCO2 OS=Homo sapiens GN=ESCO2 PE=1 SV=1                                                                                                                                                     |          | 34.77  |
| Q56UQ5                                                                                                                                                                                                                                                          | TPT1L_HUMAN TPT1-like protein OS=Homo sapiens PE=1 SV=1                                                                                                                                                                      |          | 120.36 |
| Q56VL3                                                                                                                                                                                                                                                          | OCAD2_HUMAN OCIA domain-containing protein 2 OS=Homo sapiens GN=OCIAD2 PE=1 SV=1                                                                                                                                             |          | 230.1  |
| Q56VL3-2                                                                                                                                                                                                                                                        | OCAD2_HUMAN Isoform 2 of OCIA domain-containing protein 2 OS=Homo sapiens GN=OCIAD2                                                                                                                                          |          | 28.83  |
| Q56VL3;Q56VL3-2                                                                                                                                                                                                                                                 | OCAD2_HUMAN OCIA domain-containing protein 2 OS=Homo sapiens GN=OCIAD2 PE=1 SV=1;>sp Q56VL3-2 OCAD2_HUMAN Isoform                                                                                                            | 8.78E-17 |        |
| Q58EX2                                                                                                                                                                                                                                                          | SDK2_HUMAN Protein sidekick-2 OS=Homo sapiens GN=SDK2 PE=1 SV=3                                                                                                                                                              |          |        |
| Q58EX2-2                                                                                                                                                                                                                                                        | SDK2_HUMAN Isoform 2 of Protein sidekick-2 OS=Homo sapiens GN=SDK2                                                                                                                                                           |          |        |
| Q58EX2-3                                                                                                                                                                                                                                                        | SDK2_HUMAN Isoform 3 of Protein sidekick-2 OS=Homo sapiens GN=SDK2                                                                                                                                                           |          |        |
| Q58EX2-4                                                                                                                                                                                                                                                        | SDK2_HUMAN Isoform 4 of Protein sidekick-2 OS=Homo sapiens GN=SDK2                                                                                                                                                           |          |        |
| Q58FF3                                                                                                                                                                                                                                                          | ENPLL_HUMAN Putative endoplasmic-like protein OS=Homo sapiens GN=HSP90B2P PE=5 SV=1                                                                                                                                          |          | 213.64 |
| Q58FF6                                                                                                                                                                                                                                                          | H90B4_HUMAN Putative heat shock protein HSP 90-beta 4 OS=Homo sapiens GN=HSP90AB4P PE=5 SV=1                                                                                                                                 |          | 233.79 |
| Q58FF7                                                                                                                                                                                                                                                          | H90B3_HUMAN Putative heat shock protein HSP 90-beta-3 OS=Homo sapiens GN=HSP90AB3P PE=5 SV=1                                                                                                                                 |          | 751.7  |
| Q58FF8                                                                                                                                                                                                                                                          | H90B2_HUMAN Putative heat shock protein HSP 90-beta 2 OS=Homo sapiens GN=HSP90AB2P PE=1 SV=2                                                                                                                                 |          | 491.4  |
| Q58FG0                                                                                                                                                                                                                                                          | HS905_HUMAN Putative heat shock protein HSP 90-alpha A5 OS=Homo sapiens GN=HSP90AA5P PE=1 SV=1                                                                                                                               |          | 281.74 |
| Q58FG1                                                                                                                                                                                                                                                          | HS904_HUMAN Putative heat shock protein HSP 90-alpha A4 OS=Homo sapiens GN=HSP90AA4P PE=5 SV=1                                                                                                                               |          | 219    |
| Q59H18                                                                                                                                                                                                                                                          | TNI3K_HUMAN Serine/threonine-protein kinase TNNI3K OS=Homo sapiens GN=TNNI3K PE=1 SV=3                                                                                                                                       |          |        |
| Q59H18-1                                                                                                                                                                                                                                                        | TNI3K_HUMAN Isoform 1 of Serine/threonine-protein kinase TNNI3K OS=Homo sapiens GN=TNNI3K                                                                                                                                    |          |        |
| Q59H18-3                                                                                                                                                                                                                                                        | TNI3K_HUMAN Isoform 3 of Serine/threonine-protein kinase TNNI3K OS=Homo sapiens GN=TNNI3K                                                                                                                                    |          |        |
| Q59H18-4                                                                                                                                                                                                                                                        | TNI3K_HUMAN Isoform 4 of Serine/threonine-protein kinase TNNI3K OS=Homo sapiens GN=TNNI3K                                                                                                                                    |          |        |
| Q5BJD5                                                                                                                                                                                                                                                          | TM41B_HUMAN Transmembrane protein 41B OS=Homo sapiens GN=TMEM41B PE=1 SV=1                                                                                                                                                   |          | 40.86  |
| Q5BJD5-2                                                                                                                                                                                                                                                        | TM41B_HUMAN Isoform 2 of Transmembrane protein 41B OS=Homo sapiens GN=TMEM41B                                                                                                                                                |          | 39.13  |
| Q5BJF2                                                                                                                                                                                                                                                          | TMM97_HUMAN Transmembrane protein 97 OS=Homo sapiens GN=TMEM97 PE=1 SV=1                                                                                                                                                     |          |        |
| Q5BJH7                                                                                                                                                                                                                                                          | YIF1B_HUMAN Protein YIF1B OS=Homo sapiens GN=YIF1B PE=1 SV=1                                                                                                                                                                 |          | 66.06  |
| Q5BJH7-2                                                                                                                                                                                                                                                        | YIF1B_HUMAN Isoform 2 of Protein YIF1B OS=Homo sapiens GN=YIF1B                                                                                                                                                              |          | 66.06  |
| Q5BJH7-3                                                                                                                                                                                                                                                        | YIF1B_HUMAN Isoform 3 of Protein YIF1B OS=Homo sapiens GN=YIF1B                                                                                                                                                              |          | 66.06  |
| Q5BJH7-4                                                                                                                                                                                                                                                        | YIF1B_HUMAN Isoform 4 of Protein YIF1B OS=Homo sapiens GN=YIF1B                                                                                                                                                              |          | 2.48   |
| Q5BJH7-5                                                                                                                                                                                                                                                        | YIF1B_HUMAN Isoform 5 of Protein YIF1B OS=Homo sapiens GN=YIF1B                                                                                                                                                              |          | 2.48   |
| Q5BKU9                                                                                                                                                                                                                                                          | CQ090_HUMAN Uncharacterized protein C17orf90 OS=Homo sapiens GN=C17orf90 PE=2 SV=1                                                                                                                                           | 5.65E-11 |        |
| Q5BKZ1                                                                                                                                                                                                                                                          | ZN326_HUMAN Zinc finger protein 326 OS=Homo sapiens GN=ZNF326 PE=1 SV=2                                                                                                                                                      |          |        |
| Q5C9Z4                                                                                                                                                                                                                                                          | NOM1_HUMAN Nucleolar MIF4G domain-containing protein 1 OS=Homo sapiens GN=NOM1 PE=1 SV=1                                                                                                                                     |          |        |
| Q5CZ79                                                                                                                                                                                                                                                          | AN20B_HUMAN Ankyrin repeat domain-containing protein 20B OS=Homo sapiens GN=ANKRD20A8P PE=2 SV=2                                                                                                                             |          |        |
| Q5CZ79-2                                                                                                                                                                                                                                                        | AN20B_HUMAN Isoform 2 of Ankyrin repeat domain-containing protein 20B OS=Homo sapiens GN=ANKRD20A8P                                                                                                                          |          |        |
| Q5CZC0                                                                                                                                                                                                                                                          | FSIP2_HUMAN Fibrous sheath-interacting protein 2 OS=Homo sapiens GN=FSIP2 PE=1 SV=4                                                                                                                                          |          | 66     |
| Q5CZC0-2                                                                                                                                                                                                                                                        | FSIP2_HUMAN Isoform 2 of Fibrous sheath-interacting protein 2 OS=Homo sapiens GN=FSIP2                                                                                                                                       |          | 2.03   |
| Q5D0E6                                                                                                                                                                                                                                                          | DALD3_HUMAN DALR anticodon-binding domain-containing protein 3 OS=Homo sapiens GN=DALRD3 PE=2 SV=2                                                                                                                           |          |        |
| Q5D0E6-2                                                                                                                                                                                                                                                        | DALD3_HUMAN Isoform 2 of DALR anticodon-binding domain-containing protein 3 OS=Homo sapiens GN=DALRD3                                                                                                                        |          |        |
| Q5D0E6-3                                                                                                                                                                                                                                                        | DALD3_HUMAN Isoform 3 of DALR anticodon-binding domain-containing protein 3 OS=Homo sapiens GN=DALRD3                                                                                                                        |          |        |
| Q5D0E6-4                                                                                                                                                                                                                                                        | DALD3_HUMAN Isoform 4 of DALR anticodon-binding domain-containing protein 3 OS=Homo sapiens GN=DALRD3                                                                                                                        |          |        |
| Q5D862                                                                                                                                                                                                                                                          | FILA2_HUMAN Filaggrin-2 OS=Homo sapiens GN=FLG2 PE=1 SV=1                                                                                                                                                                    |          | 66.77  |
| Q5EBL8                                                                                                                                                                                                                                                          | PDZ11_HUMAN PDZ domain-containing protein 11 OS=Homo sapiens GN=PDZD11 PE=1 SV=2                                                                                                                                             |          | 134.53 |
| Q5EBL8-2                                                                                                                                                                                                                                                        | PDZ11_HUMAN Isoform 2 of PDZ domain-containing protein 11 OS=Homo sapiens GN=PDZD11                                                                                                                                          |          | 134.53 |
| Q5EBL8-2;D3DVU3;Q5EBL2 PDZ11_HUMAN Isoform 2 of PDZ domain-containing protein 11 OS=Homo sapiens GN=PDZD11;>tr D3DVU3 D3DVU3_HUMAN PDZ                                                                                                                          |                                                                                                                                                                                                                              | 3.70E-45 |        |
| Q5EBM0;Q5EBM0-4;Q5EB                                                                                                                                                                                                                                            | CMPK2_HUMAN UMP-CMP kinase 2, mitochondrial OS=Homo sapiens GN=CMPK2 PE=1 SV=3;>sp Q5EBM0-4 CMPK2_HUMAN Isoform                                                                                                              | 4.64E-68 |        |
| Q5FWF4                                                                                                                                                                                                                                                          | ZRAB3_HUMAN Zinc finger Ran-binding domain-containing protein 3 OS=Homo sapiens GN=ZRANB3 PE=2 SV=2                                                                                                                          |          |        |
| Q5FWF4-2                                                                                                                                                                                                                                                        | ZRAB3_HUMAN Isoform 2 of Zinc finger Ran-binding domain-containing protein 3 OS=Homo sapiens GN=ZRANB3                                                                                                                       |          |        |
| Q5FWF4-3                                                                                                                                                                                                                                                        | ZRAB3_HUMAN Isoform 3 of Zinc finger Ran-binding domain-containing protein 3 OS=Homo sapiens GN=ZRANB3                                                                                                                       |          |        |
| Q5GJ75                                                                                                                                                                                                                                                          | TP8L3_HUMAN Tumor necrosis factor alpha-induced protein 8-like protein 3 OS=Homo sapiens GN=TNFAIP8L3 PE=2 SV=1                                                                                                              |          | 29.43  |
| Q5GLZ8;Q5GLZ8-2;Q5GLZ                                                                                                                                                                                                                                           | HERC4_HUMAN Probable E3 ubiquitin-protein ligase HERC4 OS=Homo sapiens GN=HERC4 PE=1 SV=1;>sp Q5GLZ8-2 HERC4_HUMAN                                                                                                           | 1.63E-20 |        |
| Q5H9M0                                                                                                                                                                                                                                                          | MUML1_HUMAN PWWP domain-containing protein MUM1L1 OS=Homo sapiens GN=MUM1L1 PE=2 SV=1                                                                                                                                        |          |        |
| Q5H9R7-5;Q5H9R7;Q5H9I5 PP6R3_HUMAN Isoform 5 of Serine/threonine-protein phosphatase 6 regulatory subunit 3 OS=Homo sapiens GN=PPP6R3;>sp Q5H9I5 PP6R3_HUMAN Isoform 5 of Serine/threonine-protein phosphatase 6 regulatory subunit 3 OS=Homo sapiens GN=PPP6R3 |                                                                                                                                                                                                                              | 1.61E-11 |        |
| Q5H9U9                                                                                                                                                                                                                                                          | DDX6L_HUMAN Probable ATP-dependent RNA helicase DDX60-like OS=Homo sapiens GN=DDX60L PE=2 SV=2                                                                                                                               |          | 36.54  |
| Q5H9U9-2                                                                                                                                                                                                                                                        | DDX6L_HUMAN Isoform 2 of Probable ATP-dependent RNA helicase DDX60-like OS=Homo sapiens GN=DDX60L                                                                                                                            |          | 33.06  |
| Q5HYA8                                                                                                                                                                                                                                                          | MKS3_HUMAN Meckelin OS=Homo sapiens GN=TMEM67 PE=1 SV=2                                                                                                                                                                      |          | 29.14  |
| Q5HYC2                                                                                                                                                                                                                                                          | K2026_HUMAN Uncharacterized protein KIAA2026 OS=Homo sapiens GN=KIAA2026 PE=2 SV=2                                                                                                                                           |          |        |
| Q5HYC2-2                                                                                                                                                                                                                                                        | K2026_HUMAN Isoform 2 of Uncharacterized protein KIAA2026 OS=Homo sapiens GN=KIAA2026                                                                                                                                        |          |        |
| Q5HYC2;Q5HYC2-2                                                                                                                                                                                                                                                 | K2026_HUMAN Uncharacterized protein KIAA2026 OS=Homo sapiens GN=KIAA2026 PE=2 SV=2;>sp Q5HYC2-2 K2026_HUMAN Isofo                                                                                                            | 2.73E-10 |        |
| Q5HYI8                                                                                                                                                                                                                                                          | RABL3_HUMAN Rab-like protein 3 OS=Homo sapiens GN=RABL3 PE=1 SV=1                                                                                                                                                            |          | 93.59  |
| Q5HYK3;B2RDU9;B3GK62                                                                                                                                                                                                                                            | COQ5_HUMAN Ubiquinone biosynthesis methyltransferase COQ5, mitochondrial OS=Homo sapiens GN=COQ5 PE=1 SV=2;>tr B2RDU9 COQ5_HUMAN Ubiquinone biosynthesis methyltransferase COQ5, mitochondrial OS=Homo sapiens GN=COQ5       | 1.32E-07 |        |
| Q5HYK3;Q5HYK3-2                                                                                                                                                                                                                                                 | COQ5_HUMAN 2-methoxy-6-polyprenyl-1,4-benzoquinol methylase, mitochondrial OS=Homo sapiens GN=COQ5 PE=1 SV=2;>sp Q5HYK3-2 COQ5_HUMAN 2-methoxy-6-polyprenyl-1,4-benzoquinol methylase, mitochondrial OS=Homo sapiens GN=COQ5 | 5.29E-06 |        |
| Q5J8M3                                                                                                                                                                                                                                                          | TMM85_HUMAN Transmembrane protein 85 OS=Homo sapiens GN=TMEM85 PE=1 SV=2                                                                                                                                                     |          | 75.84  |
| Q5J8M3-2                                                                                                                                                                                                                                                        | TMM85_HUMAN Isoform 2 of Transmembrane protein 85 OS=Homo sapiens GN=TMEM85                                                                                                                                                  |          | 75.84  |

|                         |                                                                                                                           |           |        |
|-------------------------|---------------------------------------------------------------------------------------------------------------------------|-----------|--------|
| Q5J8M3-3                | TMM85_HUMAN Isoform 3 of Transmembrane protein 85 OS=Homo sapiens GN=TMEM85                                               |           | 75.84  |
| Q5J8M3;Q5J8M3-2;Q5J8M   | TMM85_HUMAN Transmembrane protein 85 OS=Homo sapiens GN=TMEM85 PE=1 SV=2;>sp Q5J8M3-2 TMM85_HUMAN Isoform 2 of            | 2.93E-34  |        |
| Q5JNZ3                  | ZN311_HUMAN Zinc finger protein 311 OS=Homo sapiens GN=ZNF311 PE=1 SV=2                                                   |           |        |
| Q5JNZ5                  | RS26L_HUMAN Putative 40S ribosomal protein S26-like 1 OS=Homo sapiens GN=RPS26P11 PE=5 SV=1                               |           | 227.99 |
| Q5JPE7                  | NOMO2_HUMAN Nodal modulator 2 OS=Homo sapiens GN=NOMO2 PE=1 SV=1                                                          |           | 174.04 |
| Q5JPE7-2                | NOMO2_HUMAN Isoform 2 of Nodal modulator 2 OS=Homo sapiens GN=NOMO2                                                       |           | 174.04 |
| Q5JPE7;P69849;Q15155;C  | NOMO2_HUMAN Nodal modulator 2 OS=Homo sapiens GN=NOMO2 PE=1 SV=1;>sp P69849 NOMO3_HUMAN Nodal modulator 3 OS=             | 3.05E-20  |        |
| Q5JPF3                  | AN36C_HUMAN Ankyrin repeat domain-containing protein 36C OS=Homo sapiens PE=2 SV=3                                        |           |        |
| Q5JPF3-2                | AN36C_HUMAN Isoform 2 of Ankyrin repeat domain-containing protein 36C OS=Homo sapiens                                     |           |        |
| Q5JPH6                  | SYEM_HUMAN Probable glutamyl-tRNA synthetase, mitochondrial OS=Homo sapiens GN=EARS2 PE=1 SV=2                            | 1.17E-08  |        |
| Q5JQF8                  | PAP1M_HUMAN Polyadenylate-binding protein 1-like 2 OS=Homo sapiens GN=PABPC1L2A PE=1 SV=1                                 |           | 160.94 |
| Q5JR59                  | MTUS2_HUMAN Microtubule-associated tumor suppressor candidate 2 OS=Homo sapiens GN=MTUS2 PE=1 SV=3                        |           |        |
| Q5JR59-3                | MTUS2_HUMAN Isoform 2 of Microtubule-associated tumor suppressor candidate 2 OS=Homo sapiens GN=MTUS2                     |           |        |
| Q5JR59-4                | MTUS2_HUMAN Isoform 3 of Microtubule-associated tumor suppressor candidate 2 OS=Homo sapiens GN=MTUS2                     |           |        |
| Q5JRA6                  | MIA3_HUMAN Melanoma inhibitory activity protein 3 OS=Homo sapiens GN=MIA3 PE=1 SV=1                                       |           | 56.89  |
| Q5JRA6-2                | MIA3_HUMAN Isoform 2 of Melanoma inhibitory activity protein 3 OS=Homo sapiens GN=MIA3                                    |           | 56.89  |
| Q5JRA6-3                | MIA3_HUMAN Isoform 3 of Melanoma inhibitory activity protein 3 OS=Homo sapiens GN=MIA3                                    |           | 9.54   |
| Q5JRA6;Q5JRA6-2         | MIA3_HUMAN Melanoma inhibitory activity protein 3 OS=Homo sapiens GN=MIA3 PE=1 SV=1;>sp Q5JRA6-2 MIA3_HUMAN Isoform 2     | 4.80E-23  |        |
| Q5JRX3                  | PREP_HUMAN Presequence protease, mitochondrial OS=Homo sapiens GN=PITRM1 PE=1 SV=2                                        |           | 70.83  |
| Q5JRX3-2                | PREP_HUMAN Isoform 2 of Presequence protease, mitochondrial OS=Homo sapiens GN=PITRM1                                     |           | 70.83  |
| Q5JRX3-2;Q5JRX3         | 2 PREP_HUMAN Isoform 2 of Presequence protease, mitochondrial OS=Homo sapiens GN=PITRM1;>sp Q5JRX3 PREP_HUMAN Presequ     | 8.13E-19  |        |
| Q5JS54                  | PSMG4_HUMAN Proteasome assembly chaperone 4 OS=Homo sapiens GN=PSMG4 PE=2 SV=2                                            | 2.58E-06  |        |
| Q5JSH3;Q5JSH3-2         | WDR44_HUMAN WD repeat-containing protein 44 OS=Homo sapiens GN=WDR44 PE=1 SV=1;>sp Q5JSH3-2 WDR44_HUMAN Isoform           | 1.87E-22  |        |
| Q5JSL3                  | DOC11_HUMAN Deducator of cytokinesis protein 11 OS=Homo sapiens GN=DOCK11 PE=1 SV=2                                       |           |        |
| Q5JSP0;Q5JSP0-2         | FGD3_HUMAN FYVE, RhoGEF and PH domain-containing protein 3 OS=Homo sapiens GN=FGD3 PE=1 SV=1;>sp Q5JSP0-2 FGD3_HUI        | 1.91E-06  |        |
| Q5JTD0                  | TJAP1_HUMAN Tight junction-associated protein 1 OS=Homo sapiens GN=TJAP1 PE=1 SV=1                                        |           |        |
| Q5JTD0-2                | TJAP1_HUMAN Isoform 2 of Tight junction-associated protein 1 OS=Homo sapiens GN=TJAP1                                     |           |        |
| Q5JTD0-3                | TJAP1_HUMAN Isoform 3 of Tight junction-associated protein 1 OS=Homo sapiens GN=TJAP1                                     |           |        |
| Q5JTD0-4                | TJAP1_HUMAN Isoform 4 of Tight junction-associated protein 1 OS=Homo sapiens GN=TJAP1                                     |           |        |
| Q5JTD0;Q5JTD0-2;Q5JTD   | 1 TJAP1_HUMAN Tight junction-associated protein 1 OS=Homo sapiens GN=TJAP1 PE=1 SV=1;>sp Q5JTD0-2 TJAP1_HUMAN Isoform 2   | 1.39E-13  |        |
| Q5JTH9                  | RRP12_HUMAN RRP12-like protein OS=Homo sapiens GN=RRP12 PE=1 SV=2                                                         |           | 59.03  |
| Q5JTH9-2                | RRP12_HUMAN Isoform 2 of RRP12-like protein OS=Homo sapiens GN=RRP12                                                      |           | 59.03  |
| Q5JTH9;Q5JTH9-2         | RRP12_HUMAN RRP12-like protein OS=Homo sapiens GN=RRP12 PE=1 SV=2;>sp Q5JTH9-2 RRP12_HUMAN Isoform 2 of RRP12-like        | 5.33E-202 |        |
| Q5JTJ3                  | CA031_HUMAN Uncharacterized protein C1orf31 OS=Homo sapiens GN=C1orf31 PE=2 SV=1                                          |           | 48.06  |
| Q5JTJ3-2                | CA031_HUMAN Isoform 2 of Uncharacterized protein C1orf31 OS=Homo sapiens GN=C1orf31                                       |           | 48.06  |
| Q5JTJ3-2;Q5JTJ3;Q5JTJ3- | 2 CA031_HUMAN Isoform 2 of Uncharacterized protein C1orf31 OS=Homo sapiens GN=C1orf31;>sp Q5JTJ3 CA031_HUMAN Uncharac     | 1.08E-45  |        |
| Q5JTJ3-3                | CA031_HUMAN Isoform 3 of Uncharacterized protein C1orf31 OS=Homo sapiens GN=C1orf31                                       |           | 48.06  |
| Q5JTV8                  | TOIP1_HUMAN Torsin-1A-interacting protein 1 OS=Homo sapiens GN=TOR1AIP1 PE=1 SV=2                                         |           |        |
| Q5JTV8-2                | TOIP1_HUMAN Isoform 2 of Torsin-1A-interacting protein 1 OS=Homo sapiens GN=TOR1AIP1                                      |           |        |
| Q5JTV8;Q5JTV8-2         | TOIP1_HUMAN Torsin-1A-interacting protein 1 OS=Homo sapiens GN=TOR1AIP1 PE=1 SV=2;>sp Q5JTV8-2 TOIP1_HUMAN Isoform 2      | 1.90E-64  |        |
| Q5JTZ9                  | SYAM_HUMAN Alanyl-tRNA synthetase, mitochondrial OS=Homo sapiens GN=AARS2 PE=1 SV=1                                       |           | 39.32  |
| Q5JU00                  | TCTE1_HUMAN T-complex-associated testis-expressed protein 1 OS=Homo sapiens GN=TCTE1 PE=2 SV=1                            |           | 20.6   |
| Q5JU69                  | TOR2A_HUMAN Torsin-2A OS=Homo sapiens GN=TOR2A PE=2 SV=1                                                                  |           | 23.56  |
| Q5JUX0                  | SPIN3_HUMAN Spindlin-3 OS=Homo sapiens GN=SPIN3 PE=2 SV=1                                                                 |           | 38.06  |
| Q5JV73                  | FRPD3_HUMAN FERM and PDZ domain-containing protein 3 OS=Homo sapiens GN=FRMPD3 PE=2 SV=2                                  |           | 42.76  |
| Q5JVF3                  | PCID2_HUMAN PCI domain-containing protein 2 OS=Homo sapiens GN=PCID2 PE=1 SV=2                                            |           | 21.93  |
| Q5JVF3-2                | PCID2_HUMAN Isoform 2 of PCI domain-containing protein 2 OS=Homo sapiens GN=PCID2                                         |           | 21.93  |
| Q5JVF3-3                | PCID2_HUMAN Isoform 3 of PCI domain-containing protein 2 OS=Homo sapiens GN=PCID2                                         |           | 21.93  |
| Q5JVF3-4                | PCID2_HUMAN Isoform 4 of PCI domain-containing protein 2 OS=Homo sapiens GN=PCID2                                         |           | 21.93  |
| Q5JVF3-4;C9J439;A6NM5:4 | PCID2_HUMAN Isoform 4 of PCI domain-containing protein 2 OS=Homo sapiens GN=PCID2;>tr C9J439 C9J439_HUMAN Uncharacte      | 4.80E-09  |        |
| Q5JWF2                  | GNAS1_HUMAN Guanine nucleotide-binding protein G(s) subunit alpha isoforms XLas OS=Homo sapiens GN=GNAS PE=1 SV=2         |           | 598.18 |
| Q5JWF2-2                | GNAS1_HUMAN Isoform XLas-2 of Guanine nucleotide-binding protein G(s) subunit alpha isoforms XLas OS=Homo sapiens GN=GNAS |           | 598.18 |
| Q5JWF2-3                | GNAS1_HUMAN Isoform XLas-3 of Guanine nucleotide-binding protein G(s) subunit alpha isoforms XLas OS=Homo sapiens GN=GNAS |           | 4.85   |
| Q5JWF2;Q5JWF2-2;P6309   | GNAS1_HUMAN Guanine nucleotide-binding protein G(s) subunit alpha isoforms XLas OS=Homo sapiens GN=GNAS PE=1 SV=2;>sp C   | 1.42E-34  |        |
| Q5JWF8                  | CT134_HUMAN Putative uncharacterized actin family protein C20orf134 OS=Homo sapiens GN=C20orf134 PE=2 SV=1                |           | 17.81  |
| Q5JWR5                  | DOP1_HUMAN Protein dopey-1 OS=Homo sapiens GN=DOPEY1 PE=1 SV=1                                                            |           |        |
| Q5JXB2                  | UE2NL_HUMAN Putative ubiquitin-conjugating enzyme E2 N-like OS=Homo sapiens GN=UBE2NL PE=5 SV=1                           |           | 202.01 |
| Q5JXC2                  | MIIP_HUMAN Migration and invasion-inhibitory protein OS=Homo sapiens GN=MIIP PE=1 SV=3                                    |           | 22.78  |
| Q5JXC2-2                | MIIP_HUMAN Isoform 2 of Migration and invasion-inhibitory protein OS=Homo sapiens GN=MIIP                                 |           | 22.78  |
| Q5JYT7                  | K1755_HUMAN Uncharacterized protein KIAA1755 OS=Homo sapiens GN=KIAA1755 PE=2 SV=2                                        |           |        |
| Q5K4L6;Q5K4L6-2;Q5K4L   | S27A3_HUMAN Long-chain fatty acid transport protein 3 OS=Homo sapiens GN=SLC27A3 PE=2 SV=3;>sp Q5K4L6-2 S27A3_HUMAN       | 1.83E-27  |        |

|                                   |                                                                                                                         |           |        |
|-----------------------------------|-------------------------------------------------------------------------------------------------------------------------|-----------|--------|
| Q5K651                            | SAMD9_HUMAN Sterile alpha motif domain-containing protein 9 OS=Homo sapiens GN=SAMD9 PE=1 SV=1                          | 9.85E-11  |        |
| Q5M775                            | CYTSB_HUMAN Cytospin-B OS=Homo sapiens GN=SPECC1 PE=1 SV=1                                                              |           | 31.72  |
| Q5M775-2                          | CYTSB_HUMAN Isoform 2 of Cytospin-B OS=Homo sapiens GN=SPECC1                                                           |           | 8.69   |
| Q5M775-3                          | CYTSB_HUMAN Isoform 3 of Cytospin-B OS=Homo sapiens GN=SPECC1                                                           |           | 8.69   |
| Q5M775-4                          | CYTSB_HUMAN Isoform 4 of Cytospin-B OS=Homo sapiens GN=SPECC1                                                           |           | 31.72  |
| Q5M775-5                          | CYTSB_HUMAN Isoform 5 of Cytospin-B OS=Homo sapiens GN=SPECC1                                                           |           | 8.69   |
| Q5M775;A8MV89;B4E2A4              | CYTSB_HUMAN Cytospin-B OS=Homo sapiens GN=CYTSB PE=1 SV=1;>tr A8MV89 A8MV89_HUMAN Uncharacterized protein OS=Hon        | 5.54E-07  |        |
| Q5M9N0                            | CD158_HUMAN Coiled-coil domain-containing protein 158 OS=Homo sapiens GN=CCDC158 PE=2 SV=2                              |           | 30.85  |
| Q5M9N0-2                          | CD158_HUMAN Isoform 2 of Coiled-coil domain-containing protein 158 OS=Homo sapiens GN=CCDC158                           |           | 7.57   |
| Q5M9N0-3                          | CD158_HUMAN Isoform 3 of Coiled-coil domain-containing protein 158 OS=Homo sapiens GN=CCDC158                           |           | 7.57   |
| Q5M9N0;Q5M9N0-2;Q5M9N0-3          | CD158_HUMAN Coiled-coil domain-containing protein 158 OS=Homo sapiens GN=CCDC158 PE=2 SV=2;>sp Q5M9N0-2 CD158_HUM       | 1.14E-06  |        |
| Q5M9N0;Q5M9N0-2;Q5M9N0-3;Q5M9N0-4 | ZNF569_HUMAN Zinc finger protein 569 OS=Homo sapiens GN=ZNF569 PE=2 SV=1                                                |           |        |
| Q5MIZ7                            | P4R3B_HUMAN Serine/threonine-protein phosphatase 4 regulatory subunit 3B OS=Homo sapiens GN=SMEK2 PE=1 SV=2             |           | 0.63   |
| Q5MIZ7-2                          | P4R3B_HUMAN Isoform 2 of Serine/threonine-protein phosphatase 4 regulatory subunit 3B OS=Homo sapiens GN=SMEK2          |           | 0.63   |
| Q5MIZ7-3                          | P4R3B_HUMAN Isoform 3 of Serine/threonine-protein phosphatase 4 regulatory subunit 3B OS=Homo sapiens GN=SMEK2          |           | 0.63   |
| Q5MIZ7;Q5MIZ7-2;Q5MIZ7-3          | P4R3B_HUMAN Serine/threonine-protein phosphatase 4 regulatory subunit 3B OS=Homo sapiens GN=SMEK2 PE=1 SV=2;>sp Q5MIZ7  | 7.53E-13  |        |
| Q5PRF9                            | SMAG2_HUMAN Protein Smaug homolog 2 OS=Homo sapiens GN=SMAG2 PE=1 SV=1                                                  | 3.69E-23  |        |
| Q5PSV4                            | BRM1L_HUMAN Breast cancer metastasis-suppressor 1-like protein OS=Homo sapiens GN=BRM1L PE=1 SV=2                       |           |        |
| Q5QJE6                            | TDIF2_HUMAN Deoxynucleotidyltransferase terminal-interacting protein 2 OS=Homo sapiens GN=DNITIP2 PE=1 SV=2             |           |        |
| Q5QNW6                            | H2B2F_HUMAN Histone H2B type 2-F OS=Homo sapiens GN=HIST2H2BF PE=1 SV=3                                                 |           | 708.52 |
| Q5QP74                            | CJ115_HUMAN Putative uncharacterized protein C10orf115 OS=Homo sapiens GN=C10orf115 PE=2 SV=2                           |           |        |
| Q5QP82                            | DCA10_HUMAN DDB1- and CUL4-associated factor 10 OS=Homo sapiens GN=DCAF10 PE=1 SV=1                                     |           |        |
| Q5QP82-2                          | DCA10_HUMAN Isoform 2 of DDB1- and CUL4-associated factor 10 OS=Homo sapiens GN=DCAF10                                  |           |        |
| Q5R314                            | TTC38_HUMAN Tetratricopeptide repeat protein 38 OS=Homo sapiens GN=TTC38 PE=1 SV=1                                      | 9.14E-32  |        |
| Q5RHP9                            | CA173_HUMAN Uncharacterized protein C1orf173 OS=Homo sapiens GN=C1orf173 PE=2 SV=1                                      |           |        |
| Q5RHP9-2                          | CA173_HUMAN Isoform 2 of Uncharacterized protein C1orf173 OS=Homo sapiens GN=C1orf173                                   |           |        |
| Q5RHP9-3                          | CA173_HUMAN Isoform 3 of Uncharacterized protein C1orf173 OS=Homo sapiens GN=C1orf173                                   |           |        |
| Q5RI15                            | FA36A_HUMAN Protein FAM36A OS=Homo sapiens GN=FAM36A PE=1 SV=2                                                          |           | 88.13  |
| Q5RI15-2                          | FA36A_HUMAN Isoform 2 of Protein FAM36A OS=Homo sapiens GN=FAM36A                                                       |           | 88.13  |
| Q5RI15-2;B3KM21;Q5RI15-3          | FA36A_HUMAN Isoform 2 of Protein FAM36A OS=Homo sapiens GN=FAM36A;>tr B3KM21 B3KM21_HUMAN Family with sequence sim      | 7.49E-16  |        |
| Q5RKV6                            | EXOS6_HUMAN Exosome complex component MTR3 OS=Homo sapiens GN=EXOSC6 PE=1 SV=1                                          |           | 237.69 |
| Q5SNT6                            | FA21B_HUMAN WASH complex subunit FAM21B OS=Homo sapiens GN=FAM21B PE=1 SV=2                                             |           | 35.35  |
| Q5SQ80                            | A20A2_HUMAN Ankyrin repeat domain-containing protein 20A2 OS=Homo sapiens GN=ANKRD20A2 PE=2 SV=1                        |           |        |
| Q5SQS7                            | SH24B_HUMAN SH2 domain-containing protein 4B OS=Homo sapiens GN=SH2D4B PE=2 SV=1                                        |           | 28.25  |
| Q5SQS7-2                          | SH24B_HUMAN Isoform 2 of SH2 domain-containing protein 4B OS=Homo sapiens GN=SH2D4B                                     |           | 28.25  |
| Q5SQS7-3                          | SH24B_HUMAN Isoform 3 of SH2 domain-containing protein 4B OS=Homo sapiens GN=SH2D4B                                     |           | 28.25  |
| Q5SRD0                            | FA21D_HUMAN Putative WASH complex subunit FAM21 OS=Homo sapiens GN=FAM21D PE=3 SV=2                                     |           | 31.89  |
| Q5SRD1;Q14925                     | TI23B_HUMAN Putative mitochondrial import inner membrane translocase subunit Tim23B OS=Homo sapiens GN=TIMM23B PE=5 SV= | 1.48E-58  |        |
| Q5SRE5                            | NU188_HUMAN Nucleoporin NUP188 homolog OS=Homo sapiens GN=NUP188 PE=1 SV=1                                              |           |        |
| Q5SRE5-2                          | NU188_HUMAN Isoform 2 of Nucleoporin NUP188 homolog OS=Homo sapiens GN=NUP188                                           |           |        |
| Q5SRE5;Q5SRE5-2                   | NU188_HUMAN Nucleoporin NUP188 homolog OS=Homo sapiens GN=NUP188 PE=1 SV=1;>sp Q5SRE5-2 NU188_HUMAN Isoform 2 c         | 5.92E-18  |        |
| Q5SRE7-3;Q5SRE7;B3KN13            | PHYD1_HUMAN Isoform 3 of Phytanoyl-CoA dioxygenase domain-containing protein 1 OS=Homo sapiens GN=PHYHD1;>sp Q5SRE7     | 5.66E-11  |        |
| Q5SRE7;Q5SRE7-2                   | PHYD1_HUMAN Phytanoyl-CoA dioxygenase domain-containing protein 1 OS=Homo sapiens GN=PHYHD1 PE=1 SV=2;>sp Q5SRE7-2      | 7.63E-22  |        |
| Q5SSJ5                            | HP1B3_HUMAN Heterochromatin protein 1-binding protein 3 OS=Homo sapiens GN=HP1BP3 PE=1 SV=1                             |           | 337.56 |
| Q5SSJ5-2                          | HP1B3_HUMAN Isoform 2 of Heterochromatin protein 1-binding protein 3 OS=Homo sapiens GN=HP1BP3                          |           | 278.86 |
| Q5SSJ5-3                          | HP1B3_HUMAN Isoform 3 of Heterochromatin protein 1-binding protein 3 OS=Homo sapiens GN=HP1BP3                          |           | 278.86 |
| Q5SSJ5-5                          | HP1B3_HUMAN Isoform 4 of Heterochromatin protein 1-binding protein 3 OS=Homo sapiens GN=HP1BP3                          |           | 58.7   |
| Q5SSJ5;Q5SSJ5-2;Q5SSJ5-3          | HP1B3_HUMAN Heterochromatin protein 1-binding protein 3 OS=Homo sapiens GN=HP1BP3 PE=1 SV=1;>sp Q5SSJ5-2 HP1B3_HUMA     | 1.36E-103 |        |
| Q5ST30                            | SYVM_HUMAN Valyl-tRNA synthetase, mitochondrial OS=Homo sapiens GN=VAR2 PE=1 SV=2                                       |           |        |
| Q5ST30-2                          | SYVM_HUMAN Isoform 2 of Valyl-tRNA synthetase, mitochondrial OS=Homo sapiens GN=VAR2                                    |           |        |
| Q5SW79                            | CE170_HUMAN Centrosomal protein of 170 kDa OS=Homo sapiens GN=CEP170 PE=1 SV=1                                          |           | 107.16 |
| Q5SW79-2                          | CE170_HUMAN Isoform 2 of Centrosomal protein of 170 kDa OS=Homo sapiens GN=CEP170                                       |           | 107.16 |
| Q5SW79-3                          | CE170_HUMAN Isoform 3 of Centrosomal protein of 170 kDa OS=Homo sapiens GN=CEP170                                       |           | 107.16 |
| Q5SW79;B2RTS4;Q5SW79-2            | CE170_HUMAN Centrosomal protein of 170 kDa OS=Homo sapiens GN=CEP170 PE=1 SV=1;>tr B2RTS4 B2RTS4_HUMAN Centrosoma       | 2.20E-34  |        |
| Q5SW96                            | ARH_HUMAN Low density lipoprotein receptor adapter protein 1 OS=Homo sapiens GN=LDLRAP1 PE=1 SV=3                       | 1.05E-09  |        |
| Q5SXM8                            | DNLZ_HUMAN DNL-type zinc finger protein OS=Homo sapiens GN=DNLZ PE=2 SV=1                                               |           |        |
| Q5SY16                            | NOL9_HUMAN Polynucleotide 5-hydroxyl-kinase NOL9 OS=Homo sapiens GN=NOL9 PE=1 SV=1                                      | 6.12E-22  |        |
| Q5SYB0                            | FRPD1_HUMAN FERM and PDZ domain-containing protein 1 OS=Homo sapiens GN=FRMPD1 PE=1 SV=1                                |           |        |
| Q5SYC1                            | CLVS2_HUMAN Clavesin-2 OS=Homo sapiens GN=CLVS2 PE=2 SV=1                                                               |           | 26.97  |
| Q5SYC1-2                          | CLVS2_HUMAN Isoform 2 of Clavesin-2 OS=Homo sapiens GN=CLVS2                                                            |           | 22.06  |
| Q5SYE7                            | NHSL1_HUMAN NHS-like protein 1 OS=Homo sapiens GN=NHSL1 PE=1 SV=2                                                       |           | 20.76  |

|                        |                                                                                                                                           |          |        |
|------------------------|-------------------------------------------------------------------------------------------------------------------------------------------|----------|--------|
| Q5SYE7-2               | NHSL1_HUMAN Isoform 2 of NHS-like protein 1 OS=Homo sapiens GN=NHSL1                                                                      |          | 24.92  |
| Q5SZK8                 | FREM2_HUMAN FRAS1-related extracellular matrix protein 2 OS=Homo sapiens GN=FREM2 PE=1 SV=2                                               |          |        |
| Q5SZK8-2               | FREM2_HUMAN Isoform 2 of FRAS1-related extracellular matrix protein 2 OS=Homo sapiens GN=FREM2                                            |          |        |
| Q5SZQ8                 | CELF3_HUMAN CUGBP Elav-like family member 3 OS=Homo sapiens GN=CELF3 PE=1 SV=1                                                            |          |        |
| Q5SZQ8-2               | CELF3_HUMAN Isoform 2 of CUGBP Elav-like family member 3 OS=Homo sapiens GN=CELF3                                                         |          |        |
| Q5SZQ8-3               | CELF3_HUMAN Isoform 3 of CUGBP Elav-like family member 3 OS=Homo sapiens GN=CELF3                                                         |          |        |
| Q5T013                 | HYI_HUMAN Putative hydroxypyruvate isomerase OS=Homo sapiens GN=HYI PE=2 SV=2                                                             |          | 28.73  |
| Q5T013-2               | HYI_HUMAN Isoform 2 of Putative hydroxypyruvate isomerase OS=Homo sapiens GN=HYI                                                          |          | 28.73  |
| Q5T013-3               | HYI_HUMAN Isoform 3 of Putative hydroxypyruvate isomerase OS=Homo sapiens GN=HYI                                                          |          | 28.73  |
| Q5T013-4               | HYI_HUMAN Isoform 4 of Putative hydroxypyruvate isomerase OS=Homo sapiens GN=HYI                                                          |          | 28.73  |
| Q5T013;Q5T013-4;Q5T013 | HYI_HUMAN Putative hydroxypyruvate isomerase OS=Homo sapiens GN=HYI PE=2 SV=2;>sp Q5T013-4 HYI_HUMAN Isoform 4 of Pu                      | 4.33E-24 |        |
| Q5T035                 | CI129_HUMAN Putative uncharacterized protein C9orf129 OS=Homo sapiens GN=C9orf129 PE=1 SV=1                                               |          | 7.25   |
| Q5TON5;Q5TON5-5;Q5TON5 | FBP1L_HUMAN Formin-binding protein 1-like OS=Homo sapiens GN=FNBP1L PE=1 SV=2;>sp Q5TON5-5 FBP1L_HUMAN Isoform 5 of I                     | 2.98E-07 |        |
| Q5T0U0                 | CC122_HUMAN Coiled-coil domain-containing protein 122 OS=Homo sapiens GN=CCDC122 PE=2 SV=1                                                |          |        |
| Q5T0U0-2               | CC122_HUMAN Isoform 2 of Coiled-coil domain-containing protein 122 OS=Homo sapiens GN=CCDC122                                             |          |        |
| Q5T160                 | SYRM_HUMAN Probable arginyl-tRNA synthetase, mitochondrial OS=Homo sapiens GN=RARS2 PE=1 SV=1                                             |          |        |
| Q5T1C6                 | THEM4_HUMAN Thioesterase superfamily member 4 OS=Homo sapiens GN=THEM4 PE=1 SV=1                                                          | 2.23E-06 |        |
| Q5T1J5                 | CHCH9_HUMAN Putative coiled-coil-helix-coiled-coil-helix domain-containing protein CHCHD2P9, mitochondrial OS=Homo sapiens GN=CHCHD2P9 PE |          | 40.68  |
| Q5T1N1                 | AKND1_HUMAN Protein AKNAD1 OS=Homo sapiens GN=AKNAD1 PE=2 SV=3                                                                            |          |        |
| Q5T1N1-2               | AKND1_HUMAN Isoform 2 of Protein AKNAD1 OS=Homo sapiens GN=AKNAD1                                                                         |          |        |
| Q5T1N1-3               | AKND1_HUMAN Isoform 3 of Protein AKNAD1 OS=Homo sapiens GN=AKNAD1                                                                         |          |        |
| Q5T1N1-4               | AKND1_HUMAN Isoform 4 of Protein AKNAD1 OS=Homo sapiens GN=AKNAD1                                                                         |          |        |
| Q5T1V6-2               | DDX59_HUMAN Isoform 2 of Probable ATP-dependent RNA helicase DDX59 OS=Homo sapiens GN=DDX59                                               |          |        |
| Q5T200                 | ZC3HD_HUMAN Zinc finger CCCH domain-containing protein 13 OS=Homo sapiens GN=ZC3H13 PE=1 SV=1                                             |          |        |
| Q5T200-2               | ZC3HD_HUMAN Isoform 2 of Zinc finger CCCH domain-containing protein 13 OS=Homo sapiens GN=ZC3H13                                          |          |        |
| Q5T200;Q5T200-2        | ZC3HD_HUMAN Zinc finger CCCH domain-containing protein 13 OS=Homo sapiens GN=ZC3H13 PE=1 SV=1;>sp Q5T200-2 ZC3HD_H                        | 2.36E-11 |        |
| Q5T280                 | CI114_HUMAN Uncharacterized protein C9orf114 OS=Homo sapiens GN=C9orf114 PE=1 SV=3                                                        |          |        |
| Q5T2E6;Q5T2E6-2;B3KUU  | CJ076_HUMAN UPF0668 protein C10orf76 OS=Homo sapiens GN=C10orf76 PE=2 SV=1;>sp Q5T2E6-2 CJ076_HUMAN Isoform 2 of U                        | 1.40E-05 |        |
| Q5T2N8                 | ATD3C_HUMAN ATPase family AAA domain-containing protein 3C OS=Homo sapiens GN=ATAD3C PE=1 SV=2                                            |          | 255.81 |
| Q5T2P8                 | AXA81_HUMAN Annexin A8-like protein 1 OS=Homo sapiens GN=ANXA8L1 PE=2 SV=1                                                                |          |        |
| Q5T2S8                 | ARMC4_HUMAN Armadillo repeat-containing protein 4 OS=Homo sapiens GN=ARMC4 PE=2 SV=1                                                      |          |        |
| Q5T2T1                 | MPP7_HUMAN MAGUK p55 subfamily member 7 OS=Homo sapiens GN=MPP7 PE=1 SV=1                                                                 |          |        |
| Q5T3F8                 | TM63B_HUMAN Transmembrane protein 63B OS=Homo sapiens GN=TMEM63B PE=1 SV=1                                                                |          |        |
| Q5T3F8-3               | TM63B_HUMAN Isoform 3 of Transmembrane protein 63B OS=Homo sapiens GN=TMEM63B                                                             |          |        |
| Q5T440                 | CAF17_HUMAN Putative transferase CAF17, mitochondrial OS=Homo sapiens GN=IBA57 PE=1 SV=1                                                  | 7.89E-28 |        |
| Q5T4S7-2;Q5T4S7;Q5T4S7 | UBR4_HUMAN Isoform 2 of E3 ubiquitin-protein ligase UBR4 OS=Homo sapiens GN=UBR4;>sp Q5T4S7 UBR4_HUMAN E3 ubiquitin-                      | 3.17E-94 |        |
| Q5T5J6                 | SWT1_HUMAN Transcriptional protein SWT1 OS=Homo sapiens GN=SWT1 PE=2 SV=1                                                                 |          |        |
| Q5T5P2                 | SKT_HUMAN Sickle tail protein homolog OS=Homo sapiens GN=SKT PE=1 SV=2                                                                    |          | 73.89  |
| Q5T5P2-2               | SKT_HUMAN Isoform 2 of Sickle tail protein homolog OS=Homo sapiens GN=SKT                                                                 |          | 71.79  |
| Q5T5P2-3               | SKT_HUMAN Isoform 3 of Sickle tail protein homolog OS=Homo sapiens GN=SKT                                                                 |          | 75.9   |
| Q5T5P2-4               | SKT_HUMAN Isoform 4 of Sickle tail protein homolog OS=Homo sapiens GN=SKT                                                                 |          | 73.8   |
| Q5T5P2-6               | SKT_HUMAN Isoform 6 of Sickle tail protein homolog OS=Homo sapiens GN=SKT                                                                 |          | 69.37  |
| Q5T5P2-7               | SKT_HUMAN Isoform 5 of Sickle tail protein homolog OS=Homo sapiens GN=SKT                                                                 |          | 70.74  |
| Q5T5P2-8               | SKT_HUMAN Isoform 7 of Sickle tail protein homolog OS=Homo sapiens GN=SKT                                                                 |          | 69.37  |
| Q5T5S1                 | K1984_HUMAN Uncharacterized coiled-coil domain-containing protein KIAA1984 OS=Homo sapiens GN=KIAA1984 PE=2 SV=3                          |          |        |
| Q5T5S1-2               | K1984_HUMAN Isoform 2 of Uncharacterized coiled-coil domain-containing protein KIAA1984 OS=Homo sapiens GN=KIAA1984                       |          |        |
| Q5T5S1-3               | K1984_HUMAN Isoform 3 of Uncharacterized coiled-coil domain-containing protein KIAA1984 OS=Homo sapiens GN=KIAA1984                       |          |        |
| Q5T5S1-4               | K1984_HUMAN Isoform 4 of Uncharacterized coiled-coil domain-containing protein KIAA1984 OS=Homo sapiens GN=KIAA1984                       |          |        |
| Q5T619                 | ZN648_HUMAN Zinc finger protein 648 OS=Homo sapiens GN=ZNF648 PE=1 SV=1                                                                   | 3.70E-05 |        |
| Q5T653                 | RM02_HUMAN 39S ribosomal protein L2, mitochondrial OS=Homo sapiens GN=MRPL2 PE=1 SV=2                                                     | 1.71E-30 |        |
| Q5T655                 | CC147_HUMAN Coiled-coil domain-containing protein 147 OS=Homo sapiens GN=CCDC147 PE=2 SV=1                                                |          |        |
| Q5T6C5                 | AT7L2_HUMAN Ataxin-7-like protein 2 OS=Homo sapiens GN=ATXN7L2 PE=2 SV=1                                                                  |          | 30.18  |
| Q5T6F2                 | UBAP2_HUMAN Ubiquitin-associated protein 2 OS=Homo sapiens GN=UBAP2 PE=1 SV=1                                                             |          | 126.05 |
| Q5T6V5                 | CI064_HUMAN UPF0553 protein C9orf64 OS=Homo sapiens GN=C9orf64 PE=1 SV=1                                                                  | 2.61E-49 |        |
| Q5T749                 | KPRP_HUMAN Keratinocyte proline-rich protein OS=Homo sapiens GN=KPRP PE=1 SV=1                                                            |          |        |
| Q5T750                 | XP32_HUMAN Skin-specific protein 32 OS=Homo sapiens GN=XP32 PE=1 SV=1                                                                     |          |        |
| Q5T764                 | IFT1B_HUMAN Interferon-induced protein with tetratricopeptide repeats 1B OS=Homo sapiens GN=IFT1B PE=2 SV=1                               | 7.81E-17 |        |
| Q5T7B8                 | KIF24_HUMAN Kinesin-like protein KIF24 OS=Homo sapiens GN=KIF24 PE=1 SV=2                                                                 |          |        |
| Q5T7B8-2               | KIF24_HUMAN Isoform 2 of Kinesin-like protein KIF24 OS=Homo sapiens GN=KIF24                                                              |          |        |
| Q5T7B8-3               | KIF24_HUMAN Isoform 3 of Kinesin-like protein KIF24 OS=Homo sapiens GN=KIF24                                                              |          |        |
| Q5T7B8-4               | KIF24_HUMAN Isoform 4 of Kinesin-like protein KIF24 OS=Homo sapiens GN=KIF24                                                              |          |        |

|                        |                                                                                                                       |          |        |
|------------------------|-----------------------------------------------------------------------------------------------------------------------|----------|--------|
| Q5T7V8                 | GORAB_HUMAN RAB6-interacting golgin OS=Homo sapiens GN=GORAB PE=1 SV=1                                                |          |        |
| Q5T7V8-2               | GORAB_HUMAN Isoform 2 of RAB6-interacting golgin OS=Homo sapiens GN=GORAB                                             |          |        |
| Q5T8D3;Q5T8D3-3;B7Z2F  | ACBD5_HUMAN Acyl-CoA-binding domain-containing protein 5 OS=Homo sapiens GN=ACBD5 PE=1 SV=1;>sp Q5T8D3-3 ACBD5_HU     | 6.60E-08 |        |
| Q5T8P6                 | RBM26_HUMAN RNA-binding protein 26 OS=Homo sapiens GN=RBM26 PE=1 SV=3                                                 |          | 131.43 |
| Q5T8P6-2               | RBM26_HUMAN Isoform 2 of RNA-binding protein 26 OS=Homo sapiens GN=RBM26                                              |          | 131.43 |
| Q5T8P6-3               | RBM26_HUMAN Isoform 3 of RNA-binding protein 26 OS=Homo sapiens GN=RBM26                                              |          | 84.5   |
| Q5T8P6-4               | RBM26_HUMAN Isoform 4 of RNA-binding protein 26 OS=Homo sapiens GN=RBM26                                              |          | 70.4   |
| Q5T8P6-5               | RBM26_HUMAN Isoform 5 of RNA-binding protein 26 OS=Homo sapiens GN=RBM26                                              |          | 70.4   |
| Q5T8P6-6               | RBM26_HUMAN Isoform 6 of RNA-binding protein 26 OS=Homo sapiens GN=RBM26                                              |          | 14.1   |
| Q5T8P6;Q5T8P6-2;Q5T8P  | RBM26_HUMAN RNA-binding protein 26 OS=Homo sapiens GN=RBM26 PE=1 SV=3;>sp Q5T8P6-2 RBM26_HUMAN Isoform 2 of RNA-b     | 4.90E-20 |        |
| Q5T9A4                 | ATD3B_HUMAN ATPase family AAA domain-containing protein 3B OS=Homo sapiens GN=ATAD3B PE=1 SV=1                        |          | 381.7  |
| Q5T9A4-2               | ATD3B_HUMAN Isoform 2 of ATPase family AAA domain-containing protein 3B OS=Homo sapiens GN=ATAD3B                     |          | 94.91  |
| Q5T9A4-3               | ATD3B_HUMAN Isoform 3 of ATPase family AAA domain-containing protein 3B OS=Homo sapiens GN=ATAD3B                     |          | 249.68 |
| Q5T9A4;Q5T9A4-3        | ATD3B_HUMAN ATPase family AAA domain-containing protein 3B OS=Homo sapiens GN=ATAD3B PE=1 SV=1;>sp Q5T9A4-3 ATD3B_H   | 9.46E-44 |        |
| Q5T9S5                 | CCD18_HUMAN Coiled-coil domain-containing protein 18 OS=Homo sapiens GN=CCDC18 PE=1 SV=1                              |          |        |
| Q5T9S5-2               | CCD18_HUMAN Isoform 2 of Coiled-coil domain-containing protein 18 OS=Homo sapiens GN=CCDC18                           |          |        |
| Q5TA45                 | INT11_HUMAN Integrator complex subunit 11 OS=Homo sapiens GN=CPSF3L PE=1 SV=2                                         |          |        |
| Q5TA45-2               | INT11_HUMAN Isoform 2 of Integrator complex subunit 11 OS=Homo sapiens GN=CPSF3L                                      |          |        |
| Q5TA45-3               | INT11_HUMAN Isoform 3 of Integrator complex subunit 11 OS=Homo sapiens GN=CPSF3L                                      |          |        |
| Q5TAH2                 | S9A11_HUMAN Sodium/hydrogen exchanger 11 OS=Homo sapiens GN=SLC9A11 PE=2 SV=1                                         |          |        |
| Q5TAP6                 | UT14C_HUMAN U3 small nucleolar RNA-associated protein 14 homolog C OS=Homo sapiens GN=UTP14C PE=1 SV=1                |          |        |
| Q5TAQ9;Q5TAQ9-2        | DCAF8_HUMAN DDB1- and CUL4-associated factor 8 OS=Homo sapiens GN=DCAF8 PE=1 SV=1;>sp Q5TAQ9-2 DCAF8_HUMAN Isofor     | 8.93E-09 |        |
| Q5TAT6                 | CODA1_HUMAN Collagen alpha-1(XIII) chain OS=Homo sapiens GN=COL13A1 PE=1 SV=1                                         |          | 35.3   |
| Q5TAT6-2               | CODA1_HUMAN Isoform 2 of Collagen alpha-1(XIII) chain OS=Homo sapiens GN=COL13A1                                      |          | 35.3   |
| Q5TAT6-3               | CODA1_HUMAN Isoform 3 of Collagen alpha-1(XIII) chain OS=Homo sapiens GN=COL13A1                                      |          | 35.3   |
| Q5TAT6-4               | CODA1_HUMAN Isoform 4 of Collagen alpha-1(XIII) chain OS=Homo sapiens GN=COL13A1                                      |          | 35.3   |
| Q5TAT6-5               | CODA1_HUMAN Isoform 5 of Collagen alpha-1(XIII) chain OS=Homo sapiens GN=COL13A1                                      |          | 35.3   |
| Q5TAT6-6               | CODA1_HUMAN Isoform 6 of Collagen alpha-1(XIII) chain OS=Homo sapiens GN=COL13A1                                      |          | 35.3   |
| Q5TAT6-7               | CODA1_HUMAN Isoform 7 of Collagen alpha-1(XIII) chain OS=Homo sapiens GN=COL13A1                                      |          | 35.3   |
| Q5TAT6-8               | CODA1_HUMAN Isoform 8 of Collagen alpha-1(XIII) chain OS=Homo sapiens GN=COL13A1                                      |          | 35.3   |
| Q5TAT6-9               | CODA1_HUMAN Isoform 9 of Collagen alpha-1(XIII) chain OS=Homo sapiens GN=COL13A1                                      |          | 35.3   |
| Q5TAT6;Q5TAT6-6;Q5TAT6 | CODA1_HUMAN Collagen alpha-1(XIII) chain OS=Homo sapiens GN=COL13A1 PE=1 SV=1;>sp Q5TAT6-6 CODA1_HUMAN Isoform 6 (    | 1.71E-12 |        |
| Q5TAX3                 | TUT4_HUMAN Terminal uridylyltransferase 4 OS=Homo sapiens GN=ZCCHC11 PE=1 SV=3                                        |          |        |
| Q5TAX3-2               | TUT4_HUMAN Isoform 2 of Terminal uridylyltransferase 4 OS=Homo sapiens GN=ZCCHC11                                     |          |        |
| Q5TB30                 | DEP1A_HUMAN DEP domain-containing protein 1A OS=Homo sapiens GN=DEPDC1 PE=1 SV=2                                      |          | 13.36  |
| Q5TB30-2               | DEP1A_HUMAN Isoform 2 of DEP domain-containing protein 1A OS=Homo sapiens GN=DEPDC1                                   |          | 13.36  |
| Q5TBB1                 | RNH2B_HUMAN Ribonuclease H2 subunit B OS=Homo sapiens GN=RNASEH2B PE=1 SV=1                                           |          | 33.55  |
| Q5TC82                 | RC3H1_HUMAN Roquin OS=Homo sapiens GN=RC3H1 PE=1 SV=1                                                                 |          | 19.48  |
| Q5TC82-2               | RC3H1_HUMAN Isoform 2 of Roquin OS=Homo sapiens GN=RC3H1                                                              |          | 19.48  |
| Q5TDH0-3;Q5TDH0;Q5TD   | 3 DDI2_HUMAN Isoform 3 of Protein DDI1 homolog 2 OS=Homo sapiens GN=DDI2;>sp Q5TDH0 DDI2_HUMAN Protein DDI1 homolog   | 6.30E-08 |        |
| Q5TEZ5                 | CF163_HUMAN Uncharacterized protein C6orf163 OS=Homo sapiens GN=C6orf163 PE=1 SV=2                                    |          |        |
| Q5TF21                 | CF174_HUMAN Uncharacterized protein C6orf174 OS=Homo sapiens GN=C6orf174 PE=2 SV=1                                    |          | 41.66  |
| Q5TFE4                 | NT5D1_HUMAN 5-nucleotidase domain-containing protein 1 OS=Homo sapiens GN=NT5DC1 PE=1 SV=1                            | 1.39E-49 |        |
| Q5TGZ0                 | CA151_HUMAN UPF0327 protein C1orf151 OS=Homo sapiens GN=C1orf151 PE=1 SV=1                                            |          | 56.63  |
| Q5TH69                 | BIG3_HUMAN Brefeldin A-inhibited guanine nucleotide-exchange protein 3 OS=Homo sapiens GN=ARFGEF3 PE=1 SV=3           |          |        |
| Q5THJ4                 | VP13D_HUMAN Vacuolar protein sorting-associated protein 13D OS=Homo sapiens GN=VPS13D PE=1 SV=1                       |          |        |
| Q5THJ4-2               | VP13D_HUMAN Isoform 2 of Vacuolar protein sorting-associated protein 13D OS=Homo sapiens GN=VPS13D                    |          |        |
| Q5THJ4;Q5THJ4-2        | VP13D_HUMAN Vacuolar protein sorting-associated protein 13D OS=Homo sapiens GN=VPS13D PE=1 SV=1;>sp Q5THJ4-2 VP13D_HI | 1.61E-09 |        |
| Q5TID7                 | CA114_HUMAN Uncharacterized protein C1orf114 OS=Homo sapiens GN=C1orf114 PE=2 SV=1                                    |          | 28.93  |
| Q5TID7-2               | CA114_HUMAN Isoform 2 of Uncharacterized protein C1orf114 OS=Homo sapiens GN=C1orf114                                 |          | 28.93  |
| Q5TID7-3               | CA114_HUMAN Isoform 3 of Uncharacterized protein C1orf114 OS=Homo sapiens GN=C1orf114                                 |          | 28.93  |
| Q5TYW2                 | A20A1_HUMAN Ankyrin repeat domain-containing protein 20A1 OS=Homo sapiens GN=ANKRD20A1 PE=1 SV=1                      |          |        |
| Q5TZA2                 | CROCC_HUMAN Rootletin OS=Homo sapiens GN=CROCC PE=1 SV=1                                                              |          | 220.61 |
| Q5TZA2-2               | CROCC_HUMAN Isoform 2 of Rootletin OS=Homo sapiens GN=CROCC                                                           |          | 169.14 |
| Q5TZA2;Q5TZA2-2        | CROCC_HUMAN Rootletin OS=Homo sapiens GN=CROCC PE=1 SV=1;>sp Q5TZA2-2 CROCC_HUMAN Isoform 2 of Rootletin OS=Hom       | 2.87E-06 |        |
| Q5U3C3                 | TM164_HUMAN Transmembrane protein 164 OS=Homo sapiens GN=TMEM164 PE=1 SV=1                                            |          |        |
| Q5U5X0                 | LYRM7_HUMAN LYR motif-containing protein 7 OS=Homo sapiens GN=LYRM7 PE=1 SV=1                                         |          |        |
| Q5UIP0                 | RIF1_HUMAN Telomere-associated protein RIF1 OS=Homo sapiens GN=RIF1 PE=1 SV=2                                         |          | 240.03 |
| Q5UIP0-2               | RIF1_HUMAN Isoform 2 of Telomere-associated protein RIF1 OS=Homo sapiens GN=RIF1                                      |          | 221.58 |
| Q5UIP0;Q5UIP0-2        | RIF1_HUMAN Telomere-associated protein RIF1 OS=Homo sapiens GN=RIF1 PE=1 SV=2;>sp Q5UIP0-2 RIF1_HUMAN Isoform 2 of Te | 9.00E-12 |        |
| Q5VIR6                 | VPS53_HUMAN Vacuolar protein sorting-associated protein 53 homolog OS=Homo sapiens GN=VPS53 PE=1 SV=1                 |          | 19.75  |



|                               |                                                                                                                                         |          |          |
|-------------------------------|-----------------------------------------------------------------------------------------------------------------------------------------|----------|----------|
| Q5VIR6-2                      | VPS53_HUMAN Isoform 2 of Vacuolar protein sorting-associated protein 53 homolog OS=Homo sapiens GN=VPS53                                |          | 19.75    |
| Q5VIR6-3                      | VPS53_HUMAN Isoform 3 of Vacuolar protein sorting-associated protein 53 homolog OS=Homo sapiens GN=VPS53                                |          | 19.75    |
| Q5VIR6;Q5VIR6-3;Q5VIR6-2      | VPS53_HUMAN Vacuolar protein sorting-associated protein 53 homolog OS=Homo sapiens GN=VPS53 PE=1 SV=1;>sp Q5VIR6-3 VPS53                | 8.29E-13 |          |
| Q5VST9                        | OBSCN_HUMAN Obscurin OS=Homo sapiens GN=OBSCN PE=1 SV=3                                                                                 |          | 100.34   |
| Q5VST9-2                      | OBSCN_HUMAN Isoform 2 of Obscurin OS=Homo sapiens GN=OBSCN                                                                              |          | 100.34   |
| Q5VST9-3                      | OBSCN_HUMAN Isoform 3 of Obscurin OS=Homo sapiens GN=OBSCN                                                                              |          | 91.17    |
| Q5VST9-5                      | OBSCN_HUMAN Isoform 4 of Obscurin OS=Homo sapiens GN=OBSCN                                                                              |          | 68.47    |
| Q5VST9-6                      | OBSCN_HUMAN Isoform 5 of Obscurin OS=Homo sapiens GN=OBSCN                                                                              |          | 100.34   |
| Q5VT06                        | CE350_HUMAN Centrosome-associated protein 350 OS=Homo sapiens GN=CEP350 PE=1 SV=1                                                       |          |          |
| Q5VT25                        | MRCKA_HUMAN Serine/threonine-protein kinase MRCK alpha OS=Homo sapiens GN=CDC42BPA PE=1 SV=1                                            |          |          |
| Q5VT25-2                      | MRCKA_HUMAN Isoform 2 of Serine/threonine-protein kinase MRCK alpha OS=Homo sapiens GN=CDC42BPA                                         |          |          |
| Q5VT25-3                      | MRCKA_HUMAN Isoform 3 of Serine/threonine-protein kinase MRCK alpha OS=Homo sapiens GN=CDC42BPA                                         |          |          |
| Q5VT25-4                      | MRCKA_HUMAN Isoform 4 of Serine/threonine-protein kinase MRCK alpha OS=Homo sapiens GN=CDC42BPA                                         |          |          |
| Q5VT25-5                      | MRCKA_HUMAN Isoform 5 of Serine/threonine-protein kinase MRCK alpha OS=Homo sapiens GN=CDC42BPA                                         |          |          |
| Q5VT25-6                      | MRCKA_HUMAN Isoform 6 of Serine/threonine-protein kinase MRCK alpha OS=Homo sapiens GN=CDC42BPA                                         |          |          |
| Q5VT25-6;Q5VT25-2;Q5VT25-3    | MRCKA_HUMAN Isoform 6 of Serine/threonine-protein kinase MRCK alpha OS=Homo sapiens GN=CDC42BPA;>sp Q5VT25-2 MRCKA                      | 2.56E-08 |          |
| Q5VT40                        | FA78B_HUMAN Protein FAM78B OS=Homo sapiens GN=FAM78B PE=2 SV=1                                                                          |          |          |
| Q5VT52                        | RPRD2_HUMAN Regulation of nuclear pre domain-containing protein 2 OS=Homo sapiens GN=RPRD2 PE=1 SV=1                                    |          |          |
| Q5VT52-2                      | RPRD2_HUMAN Isoform 2 of Regulation of nuclear pre domain-containing protein 2 OS=Homo sapiens GN=RPRD2                                 |          |          |
| Q5VT52-3                      | RPRD2_HUMAN Isoform 3 of Regulation of nuclear pre domain-containing protein 2 OS=Homo sapiens GN=RPRD2                                 |          |          |
| Q5VT52-4                      | RPRD2_HUMAN Isoform 4 of Regulation of nuclear pre domain-containing protein 2 OS=Homo sapiens GN=RPRD2                                 |          |          |
| Q5VT52;Q5VT52-2;Q5VT52-3      | RPRD2_HUMAN Regulation of nuclear pre-mRNA domain-containing protein 2 OS=Homo sapiens GN=RPRD2 PE=1 SV=1;>sp Q5VT52-2                  | 8.18E-08 |          |
| Q5VT79                        | AXA82_HUMAN Annexin A8-like protein 2 OS=Homo sapiens GN=ANXA8L2 PE=2 SV=1                                                              |          |          |
| Q5VT79-2                      | AXA82_HUMAN Isoform 2 of Annexin A8-like protein 2 OS=Homo sapiens GN=ANXA8L2                                                           |          |          |
| Q5VT79;P13928;Q5T2P8;Q5VT79-2 | AXA82_HUMAN Annexin A8-like protein 2 OS=Homo sapiens GN=ANXA8L2 PE=2 SV=1;>sp P13928 ANXA8_HUMAN Annexin A8 OS=Homo sapiens GN=ANXA8L2 | 5.53E-97 |          |
| Q5VTE0                        | EF1A3_HUMAN Putative elongation factor 1-alpha-like 3 OS=Homo sapiens GN=EEF1A1P5 PE=5 SV=1                                             |          | 1752.46  |
| Q5VTH9                        | WDR78_HUMAN WD repeat-containing protein 78 OS=Homo sapiens GN=WDR78 PE=2 SV=1                                                          |          | 21.96    |
| Q5VTH9-3                      | WDR78_HUMAN Isoform 3 of WD repeat-containing protein 78 OS=Homo sapiens GN=WDR78                                                       |          | 21.23    |
| Q5VTL8                        | PR38B_HUMAN Pre-splicing factor 38B OS=Homo sapiens GN=PRPF38B PE=1 SV=1                                                                |          | 142.55   |
| Q5VTL8-2                      | PR38B_HUMAN Isoform 2 of Pre-splicing factor 38B OS=Homo sapiens GN=PRPF38B                                                             |          | 107      |
| Q5VTL8;Q5VTL8-2               | PR38B_HUMAN Pre-mRNA-splicing factor 38B OS=Homo sapiens GN=PRPF38B PE=1 SV=1;>sp Q5VTL8-2 PR38B_HUMAN Isoform 2 c                      | 2.30E-16 |          |
| Q5VTR2                        | BRE1A_HUMAN E3 ubiquitin-protein ligase BRE1A OS=Homo sapiens GN=RNF20 PE=1 SV=2                                                        |          | 93.29    |
| Q5VTU8                        | AT5EL_HUMAN ATP synthase subunit epsilon-like protein, mitochondrial OS=Homo sapiens GN=ATP5EP2 PE=1 SV=1                               |          |          |
| Q5VU43                        | MYOME_HUMAN Myomegalin OS=Homo sapiens GN=PDE4DIP PE=1 SV=1                                                                             |          | 36       |
| Q5VU43-10                     | MYOME_HUMAN Isoform 10 of Myomegalin OS=Homo sapiens GN=PDE4DIP                                                                         |          | 4.54     |
| Q5VU43-11                     | MYOME_HUMAN Isoform 11 of Myomegalin OS=Homo sapiens GN=PDE4DIP                                                                         |          | 4.54     |
| Q5VU43-12                     | MYOME_HUMAN Isoform 12 of Myomegalin OS=Homo sapiens GN=PDE4DIP                                                                         |          | 4.54     |
| Q5VU43-2                      | MYOME_HUMAN Isoform 2 of Myomegalin OS=Homo sapiens GN=PDE4DIP                                                                          |          | 1.76     |
| Q5VU43-3                      | MYOME_HUMAN Isoform 3 of Myomegalin OS=Homo sapiens GN=PDE4DIP                                                                          |          | 34.96    |
| Q5VU43-4                      | MYOME_HUMAN Isoform 4 of Myomegalin OS=Homo sapiens GN=PDE4DIP                                                                          |          | 36       |
| Q5VU43-5                      | MYOME_HUMAN Isoform 5 of Myomegalin OS=Homo sapiens GN=PDE4DIP                                                                          |          | 29.7     |
| Q5VU43-6                      | MYOME_HUMAN Isoform 6 of Myomegalin OS=Homo sapiens GN=PDE4DIP                                                                          |          | 6.3      |
| Q5VU43-7                      | MYOME_HUMAN Isoform 7 of Myomegalin OS=Homo sapiens GN=PDE4DIP                                                                          |          | 6.3      |
| Q5VU43-8                      | MYOME_HUMAN Isoform 8 of Myomegalin OS=Homo sapiens GN=PDE4DIP                                                                          |          | 4.54     |
| Q5VU43-9                      | MYOME_HUMAN Isoform 9 of Myomegalin OS=Homo sapiens GN=PDE4DIP                                                                          |          | 4.54     |
| Q5VU97                        | CAHD1_HUMAN VWFA and cache domain-containing protein 1 OS=Homo sapiens GN=CACHD1 PE=1 SV=2                                              |          |          |
| Q5VU97-2                      | CAHD1_HUMAN Isoform 2 of VWFA and cache domain-containing protein 1 OS=Homo sapiens GN=CACHD1                                           |          |          |
| Q5VU97;Q5VU97-2               | CAHD1_HUMAN VWFA and cache domain-containing protein 1 OS=Homo sapiens GN=CACHD1 PE=1 SV=2;>sp Q5VU97-2 CAHD1_HUMAN Isoform 2           | 4.16E-06 |          |
| Q5VUR7                        | A20A3_HUMAN Ankyrin repeat domain-containing protein 20A3 OS=Homo sapiens GN=ANKRD20A3 PE=4 SV=1                                        |          |          |
| Q5VV42;Q5VV42-2               | CDKAL_HUMAN CDK5 regulatory subunit-associated protein 1-like 1 OS=Homo sapiens GN=CDKAL1 PE=1 SV=1;>sp Q5VV42-2 CDKAL1                 | 9.94E-10 |          |
| Q5VV67                        | PPRC1_HUMAN Peroxisome proliferator-activated receptor gamma coactivator-related protein 1 OS=Homo sapiens GN=PPRC1 PE=1 SV=1           |          | 51.32    |
| Q5VV67-2                      | PPRC1_HUMAN Isoform 2 of Peroxisome proliferator-activated receptor gamma coactivator-related protein 1 OS=Homo sapiens GN=PPRC1        |          | 51.32    |
| Q5VVM6;Q5VVM6-2               | CCD30_HUMAN Coiled-coil domain-containing protein 30 OS=Homo sapiens GN=CCDC30 PE=2 SV=1;>sp Q5VVM6-2 CCD30_HUMAN                       | 1.27E-11 |          |
| Q5VW32                        | BROX_HUMAN BRO1 domain-containing protein BROX OS=Homo sapiens GN=BROX PE=1 SV=1                                                        |          | 9.11E-27 |
| Q5VW36                        | K1797_HUMAN Uncharacterized protein KIAA1797 OS=Homo sapiens GN=KIAA1797 PE=1 SV=1                                                      |          | 3.44E-12 |
| Q5VW38;Q5VW38-2;Q5VW38-1      | GP107_HUMAN Protein GPR107 OS=Homo sapiens GN=GPR107 PE=2 SV=1;>sp Q5VW38-2 GP107_HUMAN Isoform 2 of Protein GPR107                     | 2.01E-09 |          |
| Q5VWI1                        | TCRGL_HUMAN Transcription elongation regulator 1-like protein OS=Homo sapiens GN=TCERG1L PE=2 SV=2                                      |          | 14.56    |
| Q5VWQ8;Q5VWQ8-2;Q5VWQ8-1      | DAB2P_HUMAN Disabled homolog 2-interacting protein OS=Homo sapiens GN=DAB2IP PE=1 SV=2;>sp Q5VWQ8-2 DAB2P_HUMAN Isoform 2               | 4.26E-06 |          |
| Q5VWX1                        | KHDR2_HUMAN KH domain-containing, RNA-binding, signal transduction-associated protein 2 OS=Homo sapiens GN=KHDRBS2 PE=1 SV=1            |          |          |
| Q5VWZ2;Q5VWZ2-2               | LYPL1_HUMAN Lysophospholipase-like protein 1 OS=Homo sapiens GN=LYPLAL1 PE=1 SV=3;>sp Q5VWZ2-2 LYPL1_HUMAN Isoform 2                    | 1.59E-08 |          |
| Q5VXD3                        | SAM13_HUMAN Sterile alpha motif domain-containing protein 13 OS=Homo sapiens GN=SAMD13 PE=2 SV=1                                        |          |          |

|                          |                                                                                                                        |          |
|--------------------------|------------------------------------------------------------------------------------------------------------------------|----------|
| Q5VXD3-2                 | SAM13_HUMAN Isoform 2 of Sterile alpha motif domain-containing protein 13 OS=Homo sapiens GN=SAMD13                    |          |
| Q5VXD3-3                 | SAM13_HUMAN Isoform 3 of Sterile alpha motif domain-containing protein 13 OS=Homo sapiens GN=SAMD13                    |          |
| Q5VYJ4                   | RUEL1_HUMAN Putative small nuclear ribonucleoprotein polypeptide E-like protein 1 OS=Homo sapiens GN=SNRPEL1 PE=5 SV=1 | 186.64   |
| Q5VYJ5                   | CJ112_HUMAN MAM and LDL-receptor class A domain-containing protein C10orf112 OS=Homo sapiens GN=C10orf112 PE=2 SV=3    |          |
| Q5VYK3                   | ECM29_HUMAN Proteasome-associated protein ECM29 homolog OS=Homo sapiens GN=ECM29 PE=1 SV=2                             | 311.92   |
| Q5VYS8                   | TUT7_HUMAN Terminal uridylyltransferase 7 OS=Homo sapiens GN=ZCCHC6 PE=1 SV=1                                          |          |
| Q5VYS8-2                 | TUT7_HUMAN Isoform 2 of Terminal uridylyltransferase 7 OS=Homo sapiens GN=ZCCHC6                                       |          |
| Q5VYS8-4                 | TUT7_HUMAN Isoform 4 of Terminal uridylyltransferase 7 OS=Homo sapiens GN=ZCCHC6                                       |          |
| Q5VYS8-6                 | TUT7_HUMAN Isoform 6 of Terminal uridylyltransferase 7 OS=Homo sapiens GN=ZCCHC6                                       |          |
| Q5VYS8;Q5VYS8-6;Q5VYS8-6 | TUT7_HUMAN Terminal uridylyltransferase 7 OS=Homo sapiens GN=ZCCHC6 PE=1 SV=1;>sp Q5VYS8-6 TUT7_HUMAN Isoform 6 of T   | 3.24E-05 |
| Q5VYY1                   | ANR22_HUMAN Ankyrin repeat domain-containing protein 22 OS=Homo sapiens GN=ANKRD22 PE=2 SV=1                           | 2.56E-09 |
| Q5VZ03                   | NXNL2_HUMAN Nucleoredoxin-like protein 2 OS=Homo sapiens GN=NXNL2 PE=2 SV=1                                            |          |
| Q5VZ03-3                 | NXNL2_HUMAN Isoform 2 of Nucleoredoxin-like protein 2 OS=Homo sapiens GN=NXNL2                                         |          |
| Q5VZF2                   | MBNL2_HUMAN Muscblind-like protein 2 OS=Homo sapiens GN=MBNL2 PE=1 SV=2                                                |          |
| Q5VZF2-2                 | MBNL2_HUMAN Isoform 2 of Muscblind-like protein 2 OS=Homo sapiens GN=MBNL2                                             |          |
| Q5VZF2-3                 | MBNL2_HUMAN Isoform 3 of Muscblind-like protein 2 OS=Homo sapiens GN=MBNL2                                             |          |
| Q5VZF2;Q5VZF2-2;Q5VZF2-3 | MBNL2_HUMAN Muscblind-like protein 2 OS=Homo sapiens GN=MBNL2 PE=1 SV=2;>sp Q5VZF2-2 MBNL2_HUMAN Isoform 2 of Mu       | 8.55E-11 |
| Q5VZK9                   | LR16A_HUMAN Leucine-rich repeat-containing protein 16A OS=Homo sapiens GN=LRRRC16A PE=1 SV=1                           |          |
| Q5VZK9-2                 | LR16A_HUMAN Isoform 2 of Leucine-rich repeat-containing protein 16A OS=Homo sapiens GN=LRRRC16A                        |          |
| Q5VZK9-3                 | LR16A_HUMAN Isoform 3 of Leucine-rich repeat-containing protein 16A OS=Homo sapiens GN=LRRRC16A                        |          |
| Q5W0B1                   | RN219_HUMAN RING finger protein 219 OS=Homo sapiens GN=RNF219 PE=1 SV=1                                                |          |
| Q5W111                   | SPRY7_HUMAN SPRY domain-containing protein 7 OS=Homo sapiens GN=SPRYD7 PE=1 SV=2                                       | 71.12    |
| Q5W111-2                 | SPRY7_HUMAN Isoform 2 of SPRY domain-containing protein 7 OS=Homo sapiens GN=SPRYD7                                    | 71.12    |
| Q5W111;Q5W111-2          | SPRY7_HUMAN SPRY domain-containing protein 7 OS=Homo sapiens GN=SPRYD7 PE=1 SV=2;>sp Q5W111-2 SPRY7_HUMAN Isoform      | 5.49E-17 |
| Q5XKE5                   | K2C79_HUMAN Keratin, type II cytoskeletal 79 OS=Homo sapiens GN=KRT79 PE=1 SV=2                                        | 415.11   |
| Q5XKP0                   | QIL1_HUMAN Protein QIL1 OS=Homo sapiens GN=QIL1 PE=1 SV=1                                                              | 107.22   |
| Q5XKR4                   | OTP_HUMAN Homeobox protein orthopedia OS=Homo sapiens GN=OTP PE=1 SV=1                                                 |          |
| Q5XPI4                   | RN123_HUMAN E3 ubiquitin-protein ligase RNF123 OS=Homo sapiens GN=RNF123 PE=1 SV=1                                     |          |
| Q5XPI4-2                 | RN123_HUMAN Isoform 2 of E3 ubiquitin-protein ligase RNF123 OS=Homo sapiens GN=RNF123                                  |          |
| Q5XX13                   | FBW10_HUMAN F-box/WD repeat-containing protein 10 OS=Homo sapiens GN=FBXW10 PE=2 SV=2                                  |          |
| Q5XX13-2                 | FBW10_HUMAN Isoform 2 of F-box/WD repeat-containing protein 10 OS=Homo sapiens GN=FBXW10                               |          |
| Q5XX13-3                 | FBW10_HUMAN Isoform 3 of F-box/WD repeat-containing protein 10 OS=Homo sapiens GN=FBXW10                               |          |
| Q5XX13-4                 | FBW10_HUMAN Isoform 4 of F-box/WD repeat-containing protein 10 OS=Homo sapiens GN=FBXW10                               |          |
| Q5Y7A7                   | 2B1D_HUMAN HLA class II histocompatibility antigen, DRB1-13 beta chain OS=Homo sapiens GN=HLA-DRB1 PE=1 SV=1           | 0.15     |
| Q5ZPR3                   | CD276_HUMAN CD276 antigen OS=Homo sapiens GN=CD276 PE=1 SV=1                                                           |          |
| Q5ZPR3-2                 | CD276_HUMAN Isoform 2 of CD276 antigen OS=Homo sapiens GN=CD276                                                        |          |
| Q5ZPR3-3                 | CD276_HUMAN Isoform 3 of CD276 antigen OS=Homo sapiens GN=CD276                                                        |          |
| Q5ZPR3-4                 | CD276_HUMAN Isoform 4 of CD276 antigen OS=Homo sapiens GN=CD276                                                        |          |
| Q63HN8                   | RN213_HUMAN RING finger protein 213 OS=Homo sapiens GN=RNF213 PE=1 SV=2                                                | 132.26   |
| Q63HN8-2                 | RN213_HUMAN Isoform 2 of RING finger protein 213 OS=Homo sapiens GN=RNF213                                             | 17.09    |
| Q63HR2                   | TENC1_HUMAN Tensin-like C1 domain-containing phosphatase OS=Homo sapiens GN=TENC1 PE=1 SV=2                            |          |
| Q63HR2-2                 | TENC1_HUMAN Isoform 2 of Tensin-like C1 domain-containing phosphatase OS=Homo sapiens GN=TENC1                         |          |
| Q63HR2-4                 | TENC1_HUMAN Isoform 4 of Tensin-like C1 domain-containing phosphatase OS=Homo sapiens GN=TENC1                         |          |
| Q63HR2-4;A7E2A6;Q63HR2-4 | TENC1_HUMAN Isoform 4 of Tensin-like C1 domain-containing phosphatase OS=Homo sapiens GN=TENC1;>tr A7E2A6 A7E2A6_HU    | 4.53E-07 |
| Q63HR2-5                 | TENC1_HUMAN Isoform 5 of Tensin-like C1 domain-containing phosphatase OS=Homo sapiens GN=TENC1                         |          |
| Q63HR2-6                 | TENC1_HUMAN Isoform 6 of Tensin-like C1 domain-containing phosphatase OS=Homo sapiens GN=TENC1                         |          |
| Q63ZE4                   | S22AA_HUMAN Solute carrier family 22 member 10 OS=Homo sapiens GN=SLC22A10 PE=2 SV=2                                   | 24.93    |
| Q63ZY3                   | KANK2_HUMAN KN motif and ankyrin repeat domain-containing protein 2 OS=Homo sapiens GN=KANK2 PE=1 SV=1                 |          |
| Q63ZY3-2                 | KANK2_HUMAN Isoform 2 of KN motif and ankyrin repeat domain-containing protein 2 OS=Homo sapiens GN=KANK2              |          |
| Q63ZY3-2;Q63ZY3;Q63ZY3-2 | KANK2_HUMAN Isoform 2 of KN motif and ankyrin repeat domain-containing protein 2 OS=Homo sapiens GN=KANK2;>sp Q63ZY3   | 4.45E-11 |
| Q63ZY3-3                 | KANK2_HUMAN Isoform 3 of KN motif and ankyrin repeat domain-containing protein 2 OS=Homo sapiens GN=KANK2              |          |
| Q63ZY6                   | NSN5C_HUMAN Putative methyltransferase NSUN5C OS=Homo sapiens GN=NSUN5P2 PE=5 SV=2                                     | 3.39     |
| Q63ZY6-4                 | NSN5C_HUMAN Isoform 3 of Putative methyltransferase NSUN5C OS=Homo sapiens GN=NSUN5P2                                  | 3.39     |
| Q63ZY6-5                 | NSN5C_HUMAN Isoform 4 of Putative methyltransferase NSUN5C OS=Homo sapiens GN=NSUN5P2                                  | 3.39     |
| Q641Q2                   | FA21A_HUMAN WASH complex subunit FAM21A OS=Homo sapiens GN=FAM21A PE=1 SV=3                                            | 35.35    |
| Q641Q2-2                 | FA21A_HUMAN Isoform 2 of WASH complex subunit FAM21A OS=Homo sapiens GN=FAM21A                                         | 35.35    |
| Q641Q2;B7ZME8;Q641Q2-2   | FA21A_HUMAN WASH complex subunit FAM21A OS=Homo sapiens GN=FAM21A PE=1 SV=3;>tr B7ZME8 B7ZME8_HUMAN FAM21A pr          | 4.36E-09 |
| Q658T7                   | F90A2_HUMAN Putative protein FAM90A2 OS=Homo sapiens GN=FAM90A2P PE=5 SV=2                                             |          |
| Q658T7-2                 | F90A2_HUMAN Isoform 2 of Putative protein FAM90A2 OS=Homo sapiens GN=FAM90A2P                                          |          |
| Q658Y4                   | F91A1_HUMAN Protein FAM91A1 OS=Homo sapiens GN=FAM91A1 PE=1 SV=3                                                       | 52.8     |
| Q659C4                   | LAR1B_HUMAN La-related protein 1B OS=Homo sapiens GN=LARP1B PE=1 SV=2                                                  | 96.24    |

|                                   |                                                                                                                                                                                                                                                            |          |        |
|-----------------------------------|------------------------------------------------------------------------------------------------------------------------------------------------------------------------------------------------------------------------------------------------------------|----------|--------|
| Q659C4-2                          | LAR1B_HUMAN Isoform 2 of La-related protein 1B OS=Homo sapiens GN=LARP1B                                                                                                                                                                                   |          | 94.75  |
| Q659C4-3                          | LAR1B_HUMAN Isoform 3 of La-related protein 1B OS=Homo sapiens GN=LARP1B                                                                                                                                                                                   |          | 0.34   |
| Q659C4-4                          | LAR1B_HUMAN Isoform 4 of La-related protein 1B OS=Homo sapiens GN=LARP1B                                                                                                                                                                                   |          |        |
| Q659C4-5                          | LAR1B_HUMAN Isoform 5 of La-related protein 1B OS=Homo sapiens GN=LARP1B                                                                                                                                                                                   |          | 94.75  |
| Q659C4-6                          | LAR1B_HUMAN Isoform 6 of La-related protein 1B OS=Homo sapiens GN=LARP1B                                                                                                                                                                                   |          | 94.75  |
| Q659C4-7                          | LAR1B_HUMAN Isoform 7 of La-related protein 1B OS=Homo sapiens GN=LARP1B                                                                                                                                                                                   |          | 94.75  |
| Q659C4-9                          | LAR1B_HUMAN Isoform 9 of La-related protein 1B OS=Homo sapiens GN=LARP1B                                                                                                                                                                                   |          | 34.3   |
| Q66K14                            | TBC9B_HUMAN TBC1 domain family member 9B OS=Homo sapiens GN=TBC1D9B PE=1 SV=3                                                                                                                                                                              |          | 25.06  |
| Q66K14-2                          | TBC9B_HUMAN Isoform 2 of TBC1 domain family member 9B OS=Homo sapiens GN=TBC1D9B                                                                                                                                                                           |          | 25.06  |
| Q66K14;Q66K14-2                   | TBC9B_HUMAN TBC1 domain family member 9B OS=Homo sapiens GN=TBC1D9B PE=1 SV=3;>sp Q66K14-2 TBC9B_HUMAN Isoform 2 of TBC1 domain family member 9B OS=Homo sapiens GN=TBC1D9B PE=1 SV=3                                                                      | 2.78E-12 |        |
| Q66K66                            | TM198_HUMAN Transmembrane protein 198 OS=Homo sapiens GN=TMEM198 PE=2 SV=1                                                                                                                                                                                 |          |        |
| Q66K74                            | MAP1S_HUMAN Microtubule-associated protein 1S OS=Homo sapiens GN=MAP1S PE=1 SV=2                                                                                                                                                                           |          | 57.79  |
| Q66K79                            | CBPZ_HUMAN Carboxypeptidase Z OS=Homo sapiens GN=CPZ PE=1 SV=2                                                                                                                                                                                             |          |        |
| Q66K79-2                          | CBPZ_HUMAN Isoform 2 of Carboxypeptidase Z OS=Homo sapiens GN=CPZ                                                                                                                                                                                          |          |        |
| Q66K79-3                          | CBPZ_HUMAN Isoform 3 of Carboxypeptidase Z OS=Homo sapiens GN=CPZ                                                                                                                                                                                          |          |        |
| Q66LE6                            | 2ABD_HUMAN Serine/threonine-protein phosphatase 2A 55 kDa regulatory subunit B delta isoform OS=Homo sapiens GN=PPP2R2D PE=1 SV=1                                                                                                                          |          | 63.98  |
| Q66PJ3-2;Q66PJ3;Q66PJ3            | 2 AR6P4_HUMAN Isoform 2 of ADP-ribosylation factor-like protein 6-interacting protein 4 OS=Homo sapiens GN=ARL6IP4;>sp Q66PJ3-2 AR6P4_HUMAN Isoform 2 of ADP-ribosylation factor-like protein 6-interacting protein 4 OS=Homo sapiens GN=ARL6IP4 PE=1 SV=1 | 1.78E-16 |        |
| Q66PJ3;Q66PJ3-2;Q66PJ3            | AR6P4_HUMAN ADP-ribosylation factor-like protein 6-interacting protein 4 OS=Homo sapiens GN=ARL6IP4 PE=1 SV=1;>sp Q66PJ3-2 AR6P4_HUMAN ADP-ribosylation factor-like protein 6-interacting protein 4 OS=Homo sapiens GN=ARL6IP4 PE=1 SV=1                   | 3.25E-59 |        |
| Q68CJ6                            | SLIP_HUMAN GTPase SLIP-GC OS=Homo sapiens GN=C8orf80 PE=1 SV=3                                                                                                                                                                                             |          |        |
| Q68CP9                            | ARID2_HUMAN AT-rich interactive domain-containing protein 2 OS=Homo sapiens GN=ARID2 PE=1 SV=2                                                                                                                                                             |          |        |
| Q68CP9-2                          | ARID2_HUMAN Isoform 2 of AT-rich interactive domain-containing protein 2 OS=Homo sapiens GN=ARID2                                                                                                                                                          |          |        |
| Q68CP9-3                          | ARID2_HUMAN Isoform 3 of AT-rich interactive domain-containing protein 2 OS=Homo sapiens GN=ARID2                                                                                                                                                          |          |        |
| Q68CP9;Q68CP9-3                   | ARID2_HUMAN AT-rich interactive domain-containing protein 2 OS=Homo sapiens GN=ARID2 PE=1 SV=2;>sp Q68CP9-3 ARID2_HUMAN Isoform 3 of AT-rich interactive domain-containing protein 2 OS=Homo sapiens GN=ARID2 PE=1 SV=2                                    | 7.61E-05 |        |
| Q68CR1                            | SE1L3_HUMAN Protein sel-1 homolog 3 OS=Homo sapiens GN=SEL1L3 PE=1 SV=2                                                                                                                                                                                    |          | 19.23  |
| Q68CR1-2                          | SE1L3_HUMAN Isoform 2 of Protein sel-1 homolog 3 OS=Homo sapiens GN=SEL1L3                                                                                                                                                                                 |          | 25.54  |
| Q68CR1-3                          | SE1L3_HUMAN Isoform 3 of Protein sel-1 homolog 3 OS=Homo sapiens GN=SEL1L3                                                                                                                                                                                 |          | 17.6   |
| Q68CZ2;Q59GW4;C9JHU5              | TENS3_HUMAN Tensin-3 OS=Homo sapiens GN=TNS3 PE=1 SV=2;>tr Q59GW4 Q59GW4_HUMAN Tensin 3 variant (Fragment) OS=Homo sapiens GN=TNS3 PE=1 SV=2                                                                                                               | 3.39E-42 |        |
| Q68D06                            | SLN13_HUMAN Schlafen family member 13 OS=Homo sapiens GN=SLFN13 PE=2 SV=1                                                                                                                                                                                  |          |        |
| Q68D06-2                          | SLN13_HUMAN Isoform 2 of Schlafen family member 13 OS=Homo sapiens GN=SLFN13                                                                                                                                                                               |          |        |
| Q68D10                            | SPT2_HUMAN Protein SPT2 homolog OS=Homo sapiens GN=SPTY2D1 PE=1 SV=3                                                                                                                                                                                       |          |        |
| Q68D10-2                          | SPT2_HUMAN Isoform 2 of Protein SPT2 homolog OS=Homo sapiens GN=SPTY2D1                                                                                                                                                                                    |          |        |
| Q68D10-3                          | SPT2_HUMAN Isoform 3 of Protein SPT2 homolog OS=Homo sapiens GN=SPTY2D1                                                                                                                                                                                    |          |        |
| Q68DA7                            | FMN1_HUMAN Formin-1 OS=Homo sapiens GN=FMN1 PE=1 SV=3                                                                                                                                                                                                      |          |        |
| Q68DA7-2                          | FMN1_HUMAN Isoform 2 of Formin-1 OS=Homo sapiens GN=FMN1                                                                                                                                                                                                   |          |        |
| Q68DA7-3                          | FMN1_HUMAN Isoform 3 of Formin-1 OS=Homo sapiens GN=FMN1                                                                                                                                                                                                   |          |        |
| Q68DA7-5                          | FMN1_HUMAN Isoform 5 of Formin-1 OS=Homo sapiens GN=FMN1                                                                                                                                                                                                   |          |        |
| Q68DK2                            | ZFY26_HUMAN Zinc finger FYVE domain-containing protein 26 OS=Homo sapiens GN=ZFYVE26 PE=1 SV=3                                                                                                                                                             |          |        |
| Q68DK2-2                          | ZFY26_HUMAN Isoform 2 of Zinc finger FYVE domain-containing protein 26 OS=Homo sapiens GN=ZFYVE26                                                                                                                                                          |          |        |
| Q68DK2-3                          | ZFY26_HUMAN Isoform 3 of Zinc finger FYVE domain-containing protein 26 OS=Homo sapiens GN=ZFYVE26                                                                                                                                                          |          |        |
| Q68DK2-4                          | ZFY26_HUMAN Isoform 4 of Zinc finger FYVE domain-containing protein 26 OS=Homo sapiens GN=ZFYVE26                                                                                                                                                          |          |        |
| Q68DN6                            | RGPD1_HUMAN RANBP2-like and GRIP domain-containing protein 1/2 OS=Homo sapiens GN=RGPD1 PE=1 SV=2                                                                                                                                                          |          | 155.73 |
| Q68DN6-2                          | RGPD1_HUMAN Isoform 2 of RANBP2-like and GRIP domain-containing protein 1/2 OS=Homo sapiens GN=RGPD1                                                                                                                                                       |          | 87.62  |
| Q68E01                            | INT3_HUMAN Integrator complex subunit 3 OS=Homo sapiens GN=INTS3 PE=1 SV=1                                                                                                                                                                                 |          | 141.53 |
| Q68E01-2                          | INT3_HUMAN Isoform 2 of Integrator complex subunit 3 OS=Homo sapiens GN=INTS3                                                                                                                                                                              |          | 141.53 |
| Q68E01-3                          | INT3_HUMAN Isoform 3 of Integrator complex subunit 3 OS=Homo sapiens GN=INTS3                                                                                                                                                                              |          | 141.53 |
| Q68E01-4                          | INT3_HUMAN Isoform 4 of Integrator complex subunit 3 OS=Homo sapiens GN=INTS3                                                                                                                                                                              |          | 89.92  |
| Q68E01;Q68E01-2;Q68E01-3;Q68E01-4 | INT3_HUMAN Integrator complex subunit 3 OS=Homo sapiens GN=INTS3 PE=1 SV=1;>sp Q68E01-2 INT3_HUMAN Isoform 2 of Integrator complex subunit 3 OS=Homo sapiens GN=INTS3 PE=1 SV=1                                                                            | 6.93E-13 |        |
| Q68EM7-4                          | RHG17_HUMAN Isoform 4 of Rho GTPase-activating protein 17 OS=Homo sapiens GN=ARHGAP17                                                                                                                                                                      |          |        |
| Q68EM7-5                          | RHG17_HUMAN Isoform 5 of Rho GTPase-activating protein 17 OS=Homo sapiens GN=ARHGAP17                                                                                                                                                                      |          |        |
| Q68EM7-6                          | RHG17_HUMAN Isoform 6 of Rho GTPase-activating protein 17 OS=Homo sapiens GN=ARHGAP17                                                                                                                                                                      |          |        |
| Q68EM7;Q68EM7-5;C9JE6             | RHG17_HUMAN Rho GTPase-activating protein 17 OS=Homo sapiens GN=ARHGAP17 PE=1 SV=1;>sp Q68EM7-5 RHG17_HUMAN Isoform 5 of Rho GTPase-activating protein 17 OS=Homo sapiens GN=ARHGAP17 PE=1 SV=1                                                            | 9.84E-21 |        |
| Q69384                            | ENK2_HUMAN HERV-K_7p22.1 provirus ancestral Env polyprotein OS=Homo sapiens GN=ERVVK6 PE=1 SV=1                                                                                                                                                            |          |        |
| Q69YL0                            | YC029_HUMAN Uncharacterized protein DKFZp762I1415 OS=Homo sapiens PE=4 SV=1                                                                                                                                                                                |          |        |
| Q69YN4                            | VIR_HUMAN Protein virilizer homolog OS=Homo sapiens GN=KIAA1429 PE=1 SV=2                                                                                                                                                                                  |          | 354.15 |
| Q69YN4-2                          | VIR_HUMAN Isoform 2 of Protein virilizer homolog OS=Homo sapiens GN=KIAA1429                                                                                                                                                                               |          | 268.72 |
| Q69YN4-3                          | VIR_HUMAN Isoform 3 of Protein virilizer homolog OS=Homo sapiens GN=KIAA1429                                                                                                                                                                               |          | 354.15 |
| Q69YN4-4                          | VIR_HUMAN Isoform 4 of Protein virilizer homolog OS=Homo sapiens GN=KIAA1429                                                                                                                                                                               |          | 176.5  |
| Q69YN4;Q69YN4-3;Q69YN4-4          | VIR_HUMAN Protein virilizer homolog OS=Homo sapiens GN=KIAA1429 PE=1 SV=2;>sp Q69YN4-3 VIR_HUMAN Isoform 3 of Protein virilizer homolog OS=Homo sapiens GN=KIAA1429 PE=1 SV=2                                                                              | 5.98E-14 |        |
| Q69YQ0                            | CYTSA_HUMAN Cytospin-A OS=Homo sapiens GN=SPECC1L PE=1 SV=2                                                                                                                                                                                                | 5.77E-10 |        |
| Q6A162                            | K1C40_HUMAN Keratin, type I cytoskeletal 40 OS=Homo sapiens GN=KRT40 PE=1 SV=2                                                                                                                                                                             |          | 7.18   |
| Q6A1A2                            | PDPK2_HUMAN Putative 3-phosphoinositide-dependent protein kinase 2 OS=Homo sapiens GN=PDPK2 PE=5 SV=1                                                                                                                                                      |          |        |

|                                   |                                                                                                                             |          |        |
|-----------------------------------|-----------------------------------------------------------------------------------------------------------------------------|----------|--------|
| Q6AI08                            | HEAT6_HUMAN HEAT repeat-containing protein 6 OS=Homo sapiens GN=HEATR6 PE=1 SV=1                                            |          |        |
| Q6AWC2                            | WWC2_HUMAN Protein WWC2 OS=Homo sapiens GN=WWC2 PE=1 SV=2                                                                   |          |        |
| Q6AWC2-2                          | WWC2_HUMAN Isoform 2 of Protein WWC2 OS=Homo sapiens GN=WWC2                                                                |          |        |
| Q6AWC2-3                          | WWC2_HUMAN Isoform 3 of Protein WWC2 OS=Homo sapiens GN=WWC2                                                                |          |        |
| Q6AWC2-4                          | WWC2_HUMAN Isoform 4 of Protein WWC2 OS=Homo sapiens GN=WWC2                                                                |          |        |
| Q6AWC2-5                          | WWC2_HUMAN Isoform 5 of Protein WWC2 OS=Homo sapiens GN=WWC2                                                                |          |        |
| Q6AWC2-6                          | WWC2_HUMAN Isoform 6 of Protein WWC2 OS=Homo sapiens GN=WWC2                                                                |          |        |
| Q6AWC2-7                          | WWC2_HUMAN Isoform 7 of Protein WWC2 OS=Homo sapiens GN=WWC2                                                                |          |        |
| Q6BCY4;Q6BCY4-2                   | NB5R2_HUMAN NADH-cytochrome b5 reductase 2 OS=Homo sapiens GN=CYB5R2 PE=1 SV=1;>sp Q6BCY4-2 NB5R2_HUMAN Isoform             | 4.22E-08 |        |
| Q6DD88                            | ATLA3_HUMAN Atlantin-3 OS=Homo sapiens GN=ATL3 PE=1 SV=1                                                                    |          | 560.87 |
| Q6DKI1                            | RL7L_HUMAN 60S ribosomal protein L7-like 1 OS=Homo sapiens GN=RPL7L1 PE=1 SV=1                                              |          | 177.7  |
| Q6DKJ4;Q6DKJ4-2                   | NXN_HUMAN Nucleoredoxin OS=Homo sapiens GN=NXN PE=1 SV=2;>sp Q6DKJ4-2 NXN_HUMAN Isoform 2 of Nucleoredoxin OS=Ho            | 1.59E-09 |        |
| Q6DKK2                            | TTC19_HUMAN Tetratricopeptide repeat protein 19, mitochondrial OS=Homo sapiens GN=TTC19 PE=1 SV=4                           | 7.86E-06 |        |
| Q6DN03                            | H2B2C_HUMAN Putative histone H2B type 2-C OS=Homo sapiens GN=HIST2H2BC PE=5 SV=3                                            |          | 179.62 |
| Q6DN12                            | MCTP2_HUMAN Multiple C2 and transmembrane domain-containing protein 2 OS=Homo sapiens GN=MCTP2 PE=1 SV=3                    |          |        |
| Q6DN12-2                          | MCTP2_HUMAN Isoform 2 of Multiple C2 and transmembrane domain-containing protein 2 OS=Homo sapiens GN=MCTP2                 |          |        |
| Q6DN12-3                          | MCTP2_HUMAN Isoform 3 of Multiple C2 and transmembrane domain-containing protein 2 OS=Homo sapiens GN=MCTP2                 |          |        |
| Q6DN12-4                          | MCTP2_HUMAN Isoform 4 of Multiple C2 and transmembrane domain-containing protein 2 OS=Homo sapiens GN=MCTP2                 |          |        |
| Q6DN90                            | IQEC1_HUMAN IQ motif and SEC7 domain-containing protein 1 OS=Homo sapiens GN=IQSEC1 PE=1 SV=1                               |          | 27.18  |
| Q6DN90-2                          | IQEC1_HUMAN Isoform 2 of IQ motif and SEC7 domain-containing protein 1 OS=Homo sapiens GN=IQSEC1                            |          | 20.91  |
| Q6DN90;Q6DN90-2                   | IQEC1_HUMAN IQ motif and SEC7 domain-containing protein 1 OS=Homo sapiens GN=IQSEC1 PE=1 SV=1;>sp Q6DN90-2 IQEC1_HU         | 7.24E-14 |        |
| Q6DRA6                            | H2B2D_HUMAN Putative histone H2B type 2-D OS=Homo sapiens GN=HIST2H2BD PE=5 SV=3                                            |          | 182.24 |
| Q6EEV4                            | GL1AD_HUMAN Protein GRINL1A, isoforms 4/5 OS=Homo sapiens GN=GRINL1A PE=2 SV=1                                              |          |        |
| Q6EEV4-2                          | GL1AD_HUMAN Isoform 5 of Protein GRINL1A, isoforms 4/5 OS=Homo sapiens GN=GRINL1A                                           |          |        |
| Q6EEV6                            | SUMO4_HUMAN Small ubiquitin-related modifier 4 OS=Homo sapiens GN=SUMO4 PE=1 SV=2                                           |          | 67.61  |
| Q6EKJ0                            | GTD2B_HUMAN General transcription factor II-I repeat domain-containing protein 2B OS=Homo sapiens GN=GTF2IRD2B PE=1 SV=1    |          |        |
| Q6EKJ0-2                          | GTD2B_HUMAN Isoform 2 of General transcription factor II-I repeat domain-containing protein 2B OS=Homo sapiens GN=GTF2IRD2B |          |        |
| Q6EMB2-3                          | TLL5_HUMAN Isoform 3 of Tubulin polyglutamylase TLL5 OS=Homo sapiens GN=TLL5                                                |          |        |
| Q6FHJ7                            | SFRP4_HUMAN Secreted frizzled-related protein 4 OS=Homo sapiens GN=SFRP4 PE=1 SV=2                                          | 8.79E-13 |        |
| Q6FI13                            | H2A2A_HUMAN Histone H2A type 2-A OS=Homo sapiens GN=HIST2H2AA3 PE=1 SV=3                                                    |          | 288.83 |
| Q6FI81;Q6FI81-3                   | CPIN1_HUMAN Anamorsin OS=Homo sapiens GN=CIAPIN1 PE=1 SV=2;>sp Q6FI81-3 CPIN1_HUMAN Isoform 3 of Anamorsin OS=Ho            | 5.98E-19 |        |
| Q6GMV2                            | SMYD5_HUMAN SET and MYND domain-containing protein 5 OS=Homo sapiens GN=SMYD5 PE=1 SV=2                                     | 1.26E-09 |        |
| Q6GMV3                            | PTRD1_HUMAN Putative peptidyl-tRNA hydrolase PTRHD1 OS=Homo sapiens GN=PTRHD1 PE=1 SV=1                                     | 1.16E-09 |        |
| Q6I9Y2                            | THOC7_HUMAN THO complex subunit 7 homolog OS=Homo sapiens GN=THOC7 PE=1 SV=3                                                |          | 88.06  |
| Q6IA69                            | NADE_HUMAN Glutamine-dependent NAD(+) synthetase OS=Homo sapiens GN=NADSYN1 PE=1 SV=3                                       | 3.32E-14 |        |
| Q6IAA8                            | LTOR1_HUMAN Ragulator complex protein LAMTOR1 OS=Homo sapiens GN=LAMTOR1 PE=1 SV=2                                          |          | 108.59 |
| Q6IAA8;B4DUK2                     | PDRO_HUMAN Ragulator complex protein PDRO OS=Homo sapiens GN=PDRO PE=1 SV=2;>tr B4DUK2 B4DUK2_HUMAN cDNA FLJ513             | 3.42E-59 |        |
| Q6IAN0                            | DRS7B_HUMAN Dehydrogenase/reductase SDR family member 7B OS=Homo sapiens GN=DHRS7B PE=1 SV=2                                |          | 185.01 |
| Q6IB77                            | GLYAT_HUMAN Glycine N-acyltransferase OS=Homo sapiens GN=GLYAT PE=1 SV=3                                                    |          |        |
| Q6IB77-2                          | GLYAT_HUMAN Isoform 2 of Glycine N-acyltransferase OS=Homo sapiens GN=GLYAT                                                 |          |        |
| Q6IBS0                            | TWF2_HUMAN Twinfilin-2 OS=Homo sapiens GN=TWF2 PE=1 SV=2                                                                    |          | 135.85 |
| Q6IEE8-2                          | SN12L_HUMAN Isoform 2 of Schlafen family member 12-like OS=Homo sapiens GN=SLFN12L                                          |          |        |
| Q6IN85                            | P4R3A_HUMAN Serine/threonine-protein phosphatase 4 regulatory subunit 3A OS=Homo sapiens GN=SMEK1 PE=1 SV=1                 |          | 34.84  |
| Q6IN85-2                          | P4R3A_HUMAN Isoform 2 of Serine/threonine-protein phosphatase 4 regulatory subunit 3A OS=Homo sapiens GN=SMEK1              |          | 34.84  |
| Q6IN85-4                          | P4R3A_HUMAN Isoform 4 of Serine/threonine-protein phosphatase 4 regulatory subunit 3A OS=Homo sapiens GN=SMEK1              |          | 34.84  |
| Q6IN85-5                          | P4R3A_HUMAN Isoform 5 of Serine/threonine-protein phosphatase 4 regulatory subunit 3A OS=Homo sapiens GN=SMEK1              |          | 32.38  |
| Q6IN85;Q6IN85-2;Q6IN85-4;Q6IN85-5 | P4R3A_HUMAN Serine/threonine-protein phosphatase 4 regulatory subunit 3A OS=Homo sapiens GN=SMEK1 PE=1 SV=1;>sp Q6IN85-5    | 1.99E-11 |        |
| Q6IPM2                            | IQCE_HUMAN IQ domain-containing protein E OS=Homo sapiens GN=IQCE PE=1 SV=2                                                 |          | 24.76  |
| Q6IPM2-2                          | IQCE_HUMAN Isoform 2 of IQ domain-containing protein E OS=Homo sapiens GN=IQCE                                              |          | 28.21  |
| Q6IPM2-3                          | IQCE_HUMAN Isoform 3 of IQ domain-containing protein E OS=Homo sapiens GN=IQCE                                              |          | 24.76  |
| Q6IPM2-4                          | IQCE_HUMAN Isoform 4 of IQ domain-containing protein E OS=Homo sapiens GN=IQCE                                              |          | 24.76  |
| Q6IPW1-2                          | CK071_HUMAN Isoform 2 of Uncharacterized protein C11orf71 OS=Homo sapiens GN=C11orf71                                       |          |        |
| Q6IQ22                            | RAB12_HUMAN Ras-related protein Rab-12 OS=Homo sapiens GN=RAB12 PE=1 SV=3                                                   |          | 161.75 |
| Q6IQ26                            | DEN5A_HUMAN DENN domain-containing protein 5A OS=Homo sapiens GN=DENND5A PE=1 SV=2                                          |          |        |
| Q6IS14                            | IF5AL_HUMAN Eukaryotic translation initiation factor 5A-1-like OS=Homo sapiens GN=EIF5AL1 PE=1 SV=2                         |          | 430.67 |
| Q6ISB3                            | GRHL2_HUMAN Grainyhead-like protein 2 homolog OS=Homo sapiens GN=GRHL2 PE=1 SV=1                                            |          |        |
| Q6ISB3-2                          | GRHL2_HUMAN Isoform 2 of Grainyhead-like protein 2 homolog OS=Homo sapiens GN=GRHL2                                         |          |        |
| Q6JBY9                            | CPZIP_HUMAN CapZ-interacting protein OS=Homo sapiens GN=RCSD1 PE=1 SV=1                                                     | 1.03E-14 |        |
| Q6JEL2                            | KLH10_HUMAN Kelch-like protein 10 OS=Homo sapiens GN=KLHL10 PE=2 SV=1                                                       |          |        |
| Q6JQN1                            | ACD10_HUMAN Acyl-CoA dehydrogenase family member 10 OS=Homo sapiens GN=ACAD10 PE=2 SV=1                                     |          |        |
| Q6JQN1-2                          | ACD10_HUMAN Isoform 2 of Acyl-CoA dehydrogenase family member 10 OS=Homo sapiens GN=ACAD10                                  |          |        |

|                          |                                                                                                                        |           |        |
|--------------------------|------------------------------------------------------------------------------------------------------------------------|-----------|--------|
| Q6JQN1-4                 | ACD10_HUMAN Isoform 4 of Acyl-CoA dehydrogenase family member 10 OS=Homo sapiens GN=ACAD10                             |           |        |
| Q6K0P9                   | IFIX_HUMAN Pyrin and HIN domain-containing protein 1 OS=Homo sapiens GN=PYHIN1 PE=1 SV=1                               |           | 70.07  |
| Q6K0P9-2                 | IFIX_HUMAN Isoform 2 of Pyrin and HIN domain-containing protein 1 OS=Homo sapiens GN=PYHIN1                            |           | 70.07  |
| Q6K0P9-3                 | IFIX_HUMAN Isoform 3 of Pyrin and HIN domain-containing protein 1 OS=Homo sapiens GN=PYHIN1                            |           | 70.07  |
| Q6K0P9-4                 | IFIX_HUMAN Isoform 4 of Pyrin and HIN domain-containing protein 1 OS=Homo sapiens GN=PYHIN1                            |           | 70.07  |
| Q6K0P9-5                 | IFIX_HUMAN Isoform 5 of Pyrin and HIN domain-containing protein 1 OS=Homo sapiens GN=PYHIN1                            |           | 68.46  |
| Q6K0P9-6                 | IFIX_HUMAN Isoform 6 of Pyrin and HIN domain-containing protein 1 OS=Homo sapiens GN=PYHIN1                            |           | 68.46  |
| Q6K0P9;Q6K0P9-2;Q6K0P9-3 | IFIX_HUMAN Pyrin and HIN domain-containing protein 1 OS=Homo sapiens GN=PYHIN1 PE=1 SV=1;>sp Q6K0P9-2 IFIX_HUMAN Isof  | 1.41E-10  |        |
| Q6KB66                   | K2C80_HUMAN Keratin, type II cytoskeletal 80 OS=Homo sapiens GN=KRT80 PE=1 SV=2                                        |           | 103.34 |
| Q6KB66-2                 | K2C80_HUMAN Isoform 2 of Keratin, type II cytoskeletal 80 OS=Homo sapiens GN=KRT80                                     |           | 103.34 |
| Q6KB66-3                 | K2C80_HUMAN Isoform 3 of Keratin, type II cytoskeletal 80 OS=Homo sapiens GN=KRT80                                     |           | 103.34 |
| Q6KC79                   | NIPBL_HUMAN Nipped-B-like protein OS=Homo sapiens GN=NIPBL PE=1 SV=2                                                   |           | 219.4  |
| Q6KC79-2                 | NIPBL_HUMAN Isoform 2 of Nipped-B-like protein OS=Homo sapiens GN=NIPBL                                                |           | 219.4  |
| Q6KC79-3                 | NIPBL_HUMAN Isoform 3 of Nipped-B-like protein OS=Homo sapiens GN=NIPBL                                                |           | 18.86  |
| Q6KC79;Q6KC79-2          | NIPBL_HUMAN Nipped-B-like protein OS=Homo sapiens GN=NIPBL PE=1 SV=2;>sp Q6KC79-2 NIPBL_HUMAN Isoform 2 of Nipped-B-   | 2.05E-08  |        |
| Q6KCM7                   | SCMC2_HUMAN Calcium-binding mitochondrial carrier protein SCaMC-2 OS=Homo sapiens GN=SLC25A25 PE=1 SV=1                |           | 2.02   |
| Q6KCM7-2                 | SCMC2_HUMAN Isoform 2 of Calcium-binding mitochondrial carrier protein SCaMC-2 OS=Homo sapiens GN=SLC25A25             |           | 2.02   |
| Q6KCM7-4                 | SCMC2_HUMAN Isoform 4 of Calcium-binding mitochondrial carrier protein SCaMC-2 OS=Homo sapiens GN=SLC25A25             |           | 2.02   |
| Q6KCM7-6                 | SCMC2_HUMAN Isoform 6 of Calcium-binding mitochondrial carrier protein SCaMC-2 OS=Homo sapiens GN=SLC25A25             |           | 2.02   |
| Q6L8Q7;Q6L8Q7-2          | PDE12_HUMAN 2,5-phosphodiesterase 12 OS=Homo sapiens GN=PDE12 PE=1 SV=2;>sp Q6L8Q7-2 PDE12_HUMAN Isoform 2 of 2,5-     | 2.04E-56  |        |
| Q6MZM0                   | HPL1_HUMAN Hephaestin-like protein 1 OS=Homo sapiens GN=HEPBL1 PE=2 SV=2                                               |           |        |
| Q6N021                   | TET2_HUMAN Methylcytosine dioxygenase TET2 OS=Homo sapiens GN=TET2 PE=1 SV=3                                           |           | 24.29  |
| Q6NSI1                   | AR26L_HUMAN Putative ankyrin repeat domain-containing protein 26-like protein OS=Homo sapiens GN=ANKRD26P1 PE=5 SV=2   |           |        |
| Q6NSI8                   | K1841_HUMAN Uncharacterized protein KIAA1841 OS=Homo sapiens GN=KIAA1841 PE=2 SV=2                                     |           |        |
| Q6NSI8-2                 | K1841_HUMAN Isoform 2 of Uncharacterized protein KIAA1841 OS=Homo sapiens GN=KIAA1841                                  |           |        |
| Q6NSI8-3                 | K1841_HUMAN Isoform 3 of Uncharacterized protein KIAA1841 OS=Homo sapiens GN=KIAA1841                                  |           |        |
| Q6NSJ5                   | LRC8E_HUMAN Leucine-rich repeat-containing protein 8E OS=Homo sapiens GN=LRR8E PE=2 SV=2                               | 2.38E-08  |        |
| Q6NSX1                   | CCD70_HUMAN Coiled-coil domain-containing protein 70 OS=Homo sapiens GN=CCDC70 PE=2 SV=1                               |           |        |
| Q6NSZ9                   | ZNF498_HUMAN Zinc finger protein 498 OS=Homo sapiens GN=ZNF498 PE=2 SV=3                                               |           |        |
| Q6NSZ9-2                 | ZNF498_HUMAN Isoform 2 of Zinc finger protein 498 OS=Homo sapiens GN=ZNF498                                            |           |        |
| Q6NSZ9-4                 | ZNF498_HUMAN Isoform 4 of Zinc finger protein 498 OS=Homo sapiens GN=ZNF498                                            |           |        |
| Q6NTF9                   | RHBD2_HUMAN Rhomboid domain-containing protein 2 OS=Homo sapiens GN=RHBD2 PE=2 SV=2                                    | 4.34E-09  |        |
| Q6NUI2                   | GPAT2_HUMAN Glycerol-3-phosphate acyltransferase 2, mitochondrial OS=Homo sapiens GN=GPAT2 PE=2 SV=2                   |           | 36.72  |
| Q6NUI2-3                 | GPAT2_HUMAN Isoform 2 of Glycerol-3-phosphate acyltransferase 2, mitochondrial OS=Homo sapiens GN=GPAT2                |           | 10.38  |
| Q6NUI2-4                 | GPAT2_HUMAN Isoform 3 of Glycerol-3-phosphate acyltransferase 2, mitochondrial OS=Homo sapiens GN=GPAT2                |           | 36.72  |
| Q6NUI2-5                 | GPAT2_HUMAN Isoform 4 of Glycerol-3-phosphate acyltransferase 2, mitochondrial OS=Homo sapiens GN=GPAT2                |           | 27.5   |
| Q6NUK1                   | SCMC1_HUMAN Calcium-binding mitochondrial carrier protein SCaMC-1 OS=Homo sapiens GN=SLC25A24 PE=1 SV=2                |           | 355.01 |
| Q6NUK1-2                 | SCMC1_HUMAN Isoform 2 of Calcium-binding mitochondrial carrier protein SCaMC-1 OS=Homo sapiens GN=SLC25A24             |           | 282.34 |
| Q6NUK1;Q6NUK1-2          | SCMC1_HUMAN Calcium-binding mitochondrial carrier protein SCaMC-1 OS=Homo sapiens GN=SLC25A24 PE=1 SV=2;>sp Q6NUK1-2   | 5.82E-107 |        |
| Q6NUM9                   | RETST_HUMAN All-trans-retinol 13,14-reductase OS=Homo sapiens GN=RETSAT PE=2 SV=2                                      |           | 32.79  |
| Q6NUM9-2                 | RETST_HUMAN Isoform 2 of All-trans-retinol 13,14-reductase OS=Homo sapiens GN=RETSAT                                   |           | 32.79  |
| Q6NUM9;Q6NUM9-2          | RETST_HUMAN All-trans-retinol 13,14-reductase OS=Homo sapiens GN=RETSAT PE=2 SV=2;>sp Q6NUM9-2 RETST_HUMAN Isoform     | 1.10E-12  |        |
| Q6NUQ4                   | TM214_HUMAN Transmembrane protein 214 OS=Homo sapiens GN=TMEM214 PE=1 SV=2                                             |           |        |
| Q6NUQ4-2                 | TM214_HUMAN Isoform 2 of Transmembrane protein 214 OS=Homo sapiens GN=TMEM214                                          |           |        |
| Q6NUQ4;Q6NUQ4-2          | TM214_HUMAN Transmembrane protein 214 OS=Homo sapiens GN=TMEM214 PE=1 SV=2;>sp Q6NUQ4-2 TM214_HUMAN Isoform 2          | 7.40E-13  |        |
| Q6NVV1                   | R13AX_HUMAN Putative 60S ribosomal protein L13a-like MGC87657 OS=Homo sapiens PE=5 SV=1                                |           | 264.98 |
| Q6NVY1                   | HIBCH_HUMAN 3-hydroxyisobutyryl-CoA hydrolase, mitochondrial OS=Homo sapiens GN=HIBCH PE=1 SV=2                        |           | 61.44  |
| Q6NVY1-2                 | HIBCH_HUMAN Isoform 2 of 3-hydroxyisobutyryl-CoA hydrolase, mitochondrial OS=Homo sapiens GN=HIBCH                     |           | 60.48  |
| Q6NVY1;Q6NVY1-2          | HIBCH_HUMAN 3-hydroxyisobutyryl-CoA hydrolase, mitochondrial OS=Homo sapiens GN=HIBCH PE=1 SV=2;>sp Q6NVY1-2 HIBCH_I   | 6.27E-40  |        |
| Q6NXE6;Q6NXE6-2          | ARMC6_HUMAN Armadillo repeat-containing protein 6 OS=Homo sapiens GN=ARMC6 PE=1 SV=2;>sp Q6NXE6-2 ARMC6_HUMAN Isof     | 3.05E-115 |        |
| Q6NXG1                   | ESRP1_HUMAN Epithelial splicing regulatory protein 1 OS=Homo sapiens GN=ESRP1 PE=1 SV=2                                |           | 37.7   |
| Q6NXG1-2                 | ESRP1_HUMAN Isoform 2 of Epithelial splicing regulatory protein 1 OS=Homo sapiens GN=ESRP1                             |           | 37.7   |
| Q6NXG1-3                 | ESRP1_HUMAN Isoform 3 of Epithelial splicing regulatory protein 1 OS=Homo sapiens GN=ESRP1                             |           | 37.7   |
| Q6NXG1-4                 | ESRP1_HUMAN Isoform 4 of Epithelial splicing regulatory protein 1 OS=Homo sapiens GN=ESRP1                             |           | 37.7   |
| Q6NXG1;Q6NXG1-3;Q6NXG1-4 | ESRP1_HUMAN Epithelial splicing regulatory protein 1 OS=Homo sapiens GN=ESRP1 PE=1 SV=2;>sp Q6NXG1-3 ESRP1_HUMAN Isofc | 4.59E-13  |        |
| Q6NXR0                   | IIGP5_HUMAN Interferon-inducible GTPase 5 OS=Homo sapiens GN=IRGC PE=2 SV=1                                            |           | 29.26  |
| Q6NXT2                   | H3C_HUMAN Histone H3.3C OS=Homo sapiens GN=H3F3C PE=1 SV=3                                                             |           | 108.52 |
| Q6NXT6                   | TAPT1_HUMAN Transmembrane anterior posterior transformation protein 1 homolog OS=Homo sapiens GN=TAPT1 PE=1 SV=1       |           |        |
| Q6NXT6-2                 | TAPT1_HUMAN Isoform 2 of Transmembrane anterior posterior transformation protein 1 homolog OS=Homo sapiens GN=TAPT1    |           |        |
| Q6NY19                   | KANK3_HUMAN KN motif and ankyrin repeat domain-containing protein 3 OS=Homo sapiens GN=KANK3 PE=2 SV=1                 |           |        |
| Q6NY19-2                 | KANK3_HUMAN Isoform 2 of KN motif and ankyrin repeat domain-containing protein 3 OS=Homo sapiens GN=KANK3              |           |        |



|                        |                                                                                                                              |           |         |
|------------------------|------------------------------------------------------------------------------------------------------------------------------|-----------|---------|
| Q6NYC1-3;Q6NYC1;Q6NYC3 | JMJD6_HUMAN Isoform 3 of Bifunctional arginine demethylase and lysyl-hydroxylase JMJD6 OS=Homo sapiens GN=JMJD6;>sp Q6NYC1-3 | 2.07E-09  |         |
| Q6NYC8;Q6NYC8-2        | PHTNS_HUMAN Phostensin OS=Homo sapiens GN=KIAA1949 PE=1 SV=1;>sp Q6NYC8-2 PHTNS_HUMAN Isoform 2 of Phostensin OS=            | 2.05E-117 |         |
| Q6NZ67                 | MZT2B_HUMAN Mitotic-spindle organizing protein 2B OS=Homo sapiens GN=MZT2B PE=1 SV=1                                         |           | 59.39   |
| Q6NZI2                 | PTRF_HUMAN Polymerase I and transcript release factor OS=Homo sapiens GN=PTRF PE=1 SV=1                                      |           | 1132.18 |
| Q6NZI2-2               | PTRF_HUMAN Isoform 2 of Polymerase I and transcript release factor OS=Homo sapiens GN=PTRF                                   |           | 751.67  |
| Q6NZI2-3               | PTRF_HUMAN Isoform 3 of Polymerase I and transcript release factor OS=Homo sapiens GN=PTRF                                   |           | 184.72  |
| Q6NZI2;B4DNU9;B4DPZ5   | PTRF_HUMAN Polymerase I and transcript release factor OS=Homo sapiens GN=PTRF PE=1 SV=1;>tr B4DNU9 B4DNU9_HUMAN cDN/         | 2.76E-283 |         |
| Q6NZY4-2               | ZCHC8_HUMAN Isoform 2 of Zinc finger CCHC domain-containing protein 8 OS=Homo sapiens GN=ZCCHC8                              |           |         |
| Q6NZY4;Q6NZY4-2        | ZCHC8_HUMAN Zinc finger CCHC domain-containing protein 8 OS=Homo sapiens GN=ZCCHC8 PE=1 SV=2;>sp Q6NZY4-2 ZCHC8_HL           | 1.35E-29  |         |
| Q6P158                 | DHX57_HUMAN Putative ATP-dependent RNA helicase DHX57 OS=Homo sapiens GN=DHX57 PE=1 SV=2                                     |           | 18.65   |
| Q6P158-2               | DHX57_HUMAN Isoform 2 of Putative ATP-dependent RNA helicase DHX57 OS=Homo sapiens GN=DHX57                                  |           |         |
| Q6P158-3               | DHX57_HUMAN Isoform 3 of Putative ATP-dependent RNA helicase DHX57 OS=Homo sapiens GN=DHX57                                  |           |         |
| Q6P161                 | RM54_HUMAN 39S ribosomal protein L54, mitochondrial OS=Homo sapiens GN=MRPL54 PE=1 SV=1                                      |           | 44.03   |
| Q6P179;Q6P179-3        | ERAP2_HUMAN Endoplasmic reticulum aminopeptidase 2 OS=Homo sapiens GN=ERAP2 PE=1 SV=2;>sp Q6P179-3 ERAP2_HUMAN Iso           | 4.29E-111 |         |
| Q6P1A2                 | MBOA5_HUMAN Lysophospholipid acyltransferase 5 OS=Homo sapiens GN=LPCAT3 PE=1 SV=1                                           | 8.60E-09  |         |
| Q6P1J6                 | PLB1_HUMAN Phospholipase B1, membrane-associated OS=Homo sapiens GN=PLB1 PE=1 SV=3                                           |           |         |
| Q6P1J6-3               | PLB1_HUMAN Isoform 3 of Phospholipase B1, membrane-associated OS=Homo sapiens GN=PLB1                                        |           |         |
| Q6P1J6-4               | PLB1_HUMAN Isoform 4 of Phospholipase B1, membrane-associated OS=Homo sapiens GN=PLB1                                        |           |         |
| Q6P1J6-5               | PLB1_HUMAN Isoform 5 of Phospholipase B1, membrane-associated OS=Homo sapiens GN=PLB1                                        |           |         |
| Q6P1J9                 | CDC73_HUMAN Parafibromin OS=Homo sapiens GN=CDC73 PE=1 SV=1                                                                  |           | 70.02   |
| Q6P1K8                 | T2H2L_HUMAN General transcription factor IIH subunit 2-like protein OS=Homo sapiens GN=GTF2H2C PE=2 SV=1                     |           | 36.59   |
| Q6P1L8                 | RM14_HUMAN 39S ribosomal protein L14, mitochondrial OS=Homo sapiens GN=MRPL14 PE=1 SV=1                                      |           | 258.37  |
| Q6P1M0                 | S27A4_HUMAN Long-chain fatty acid transport protein 4 OS=Homo sapiens GN=SLC27A4 PE=1 SV=1                                   |           |         |
| Q6P1M3                 | L2GL2_HUMAN Lethal(2) giant larvae protein homolog 2 OS=Homo sapiens GN=LLGL2 PE=1 SV=2                                      |           |         |
| Q6P1M3-2               | L2GL2_HUMAN Isoform A of Lethal(2) giant larvae protein homolog 2 OS=Homo sapiens GN=LLGL2                                   |           |         |
| Q6P1M3-3               | L2GL2_HUMAN Isoform B of Lethal(2) giant larvae protein homolog 2 OS=Homo sapiens GN=LLGL2                                   |           |         |
| Q6P1M3;Q6P1M3-2        | L2GL2_HUMAN Lethal(2) giant larvae protein homolog 2 OS=Homo sapiens GN=LLGL2 PE=1 SV=2;>sp Q6P1M3-2 L2GL2_HUMAN Iso         | 1.86E-127 |         |
| Q6P1N0;Q6P1N0-2        | C2D1A_HUMAN Coiled-coil and C2 domain-containing protein 1A OS=Homo sapiens GN=CC2D1A PE=1 SV=1;>sp Q6P1N0-2 C2D1A_          | 3.12E-14  |         |
| Q6P1N9;Q6P1N9-2        | TATD1_HUMAN Putative deoxyribonuclease TATDN1 OS=Homo sapiens GN=TATDN1 PE=1 SV=2;>sp Q6P1N9-2 TATD1_HUMAN Isofor            | 5.17E-09  |         |
| Q6P1Q9;Q6P1Q9-2        | MTL2B_HUMAN Methyltransferase-like protein 2B OS=Homo sapiens GN=METTL2B PE=1 SV=3;>sp Q6P1Q9-2 MTL2B_HUMAN Isoform          | 7.12E-20  |         |
| Q6P1R4                 | DUS1L_HUMAN tRNA-dihydrouridine synthase 1-like OS=Homo sapiens GN=DUS1L PE=1 SV=1                                           |           |         |
| Q6P1X5                 | TAF2_HUMAN Transcription initiation factor TFIID subunit 2 OS=Homo sapiens GN=TAF2 PE=1 SV=3                                 |           |         |
| Q6P1X6                 | CH082_HUMAN UPF0598 protein C8orf82 OS=Homo sapiens GN=C8orf82 PE=1 SV=2                                                     |           |         |
| Q6P1X6-2               | CH082_HUMAN Isoform 2 of UPF0598 protein C8orf82 OS=Homo sapiens GN=C8orf82                                                  |           |         |
| Q6P280                 | ZNF529_HUMAN Zinc finger protein 529 OS=Homo sapiens GN=ZNF529 PE=2 SV=1                                                     |           | 34.45   |
| Q6P280-2               | ZNF529_HUMAN Isoform 2 of Zinc finger protein 529 OS=Homo sapiens GN=ZNF529                                                  |           | 34.45   |
| Q6P2C8;Q6P2C8-2;B4DPP  | MED27_HUMAN Mediator of RNA polymerase II transcription subunit 27 OS=Homo sapiens GN=MED27 PE=1 SV=1;>sp Q6P2C8-2 ME        | 6.43E-05  |         |
| Q6P2E9;Q6P2E9-2        | EDC4_HUMAN Enhancer of mRNA-decapping protein 4 OS=Homo sapiens GN=EDC4 PE=1 SV=1;>sp Q6P2E9-2 EDC4_HUMAN Isoform            | 6.81E-24  |         |
| Q6P2H3                 | CEP85_HUMAN Centrosomal protein of 85 kDa OS=Homo sapiens GN=CEP85 PE=1 SV=1                                                 |           |         |
| Q6P2H3-2               | CEP85_HUMAN Isoform 2 of Centrosomal protein of 85 kDa OS=Homo sapiens GN=CEP85                                              |           |         |
| Q6P2H3-3               | CEP85_HUMAN Isoform 3 of Centrosomal protein of 85 kDa OS=Homo sapiens GN=CEP85                                              |           |         |
| Q6P2H8                 | TMM53_HUMAN Transmembrane protein 53 OS=Homo sapiens GN=TMEM53 PE=2 SV=1                                                     |           |         |
| Q6P2H8-2               | TMM53_HUMAN Isoform 2 of Transmembrane protein 53 OS=Homo sapiens GN=TMEM53                                                  |           |         |
| Q6P2I3;Q96GK7          | FAH2B_HUMAN Fumarylacetoacetate hydrolase domain-containing protein 2B OS=Homo sapiens GN=FAHD2B PE=1 SV=1;>sp Q96GK         | 4.79E-17  |         |
| Q6P2Q9                 | PRP8_HUMAN Pre-processing-splicing factor 8 OS=Homo sapiens GN=PRPF8 PE=1 SV=2                                               |           | 3517.23 |
| Q6P2Q9;B4DK16          | PRP8_HUMAN Pre-mRNA-processing-splicing factor 8 OS=Homo sapiens GN=PRPF8 PE=1 SV=2;>tr B4DK16 B4DK16_HUMAN cDNA F           | 2.37E-64  |         |
| Q6P3R8                 | NEK5_HUMAN Serine/threonine-protein kinase Nek5 OS=Homo sapiens GN=NEK5 PE=1 SV=1                                            |           |         |
| Q6P3X3                 | TTC27_HUMAN Tetratricopeptide repeat protein 27 OS=Homo sapiens GN=TTC27 PE=1 SV=1                                           |           |         |
| Q6P4A8                 | PLBL1_HUMAN Phospholipase B-like 1 OS=Homo sapiens GN=PLBD1 PE=1 SV=2                                                        | 1.10E-10  |         |
| Q6P4A8;A8K4E9          | PLBL1_HUMAN Putative phospholipase B-like 1 OS=Homo sapiens GN=PLBD1 PE=1 SV=2;>tr A8K4E9 A8K4E9_HUMAN cDNA FLJ771(          | 3.04E-11  |         |
| Q6P4I2                 | WDR73_HUMAN WD repeat-containing protein 73 OS=Homo sapiens GN=WDR73 PE=1 SV=1                                               | 3.12E-11  |         |
| Q6P4R8-2;Q6P4R8;Q6P4R  | 2 NFRKB_HUMAN Isoform 2 of Nuclear factor related to kappa-B-binding protein OS=Homo sapiens GN=NFRKB;>sp Q6P4R8 NFRKB_      | 7.94E-10  |         |
| Q6P575                 | YV019_HUMAN Putative uncharacterized protein LOC91316 OS=Homo sapiens GN=YV019 PE=5 SV=2                                     |           |         |
| Q6P582                 | MZT2A_HUMAN Mitotic-spindle organizing protein 2A OS=Homo sapiens GN=MZT2A PE=1 SV=2                                         |           | 9.6     |
| Q6P587                 | FAHD1_HUMAN Fumarylacetoacetate hydrolase domain-containing protein 1 OS=Homo sapiens GN=FAHD1 PE=1 SV=2                     |           |         |
| Q6P587-2               | FAHD1_HUMAN Isoform 2 of Fumarylacetoacetate hydrolase domain-containing protein 1 OS=Homo sapiens GN=FAHD1                  |           |         |
| Q6P587-2;Q6P587        | 2 FAHD1_HUMAN Isoform 2 of Fumarylacetoacetate hydrolase domain-containing protein 1 OS=Homo sapiens GN=FAHD1;>sp Q6P58      | 8.08E-31  |         |
| Q6P589                 | TP8L2_HUMAN Tumor necrosis factor alpha-induced protein 8-like protein 2 OS=Homo sapiens GN=TNFAIP8L2 PE=1 SV=1              |           |         |
| Q6P5R6                 | RL22L_HUMAN 60S ribosomal protein L22-like 1 OS=Homo sapiens GN=RPL22L1 PE=1 SV=2                                            |           | 20.47   |
| Q6P5Z2                 | PKN3_HUMAN Serine/threonine-protein kinase N3 OS=Homo sapiens GN=PKN3 PE=1 SV=1                                              |           |         |
| Q6P656                 | CO026_HUMAN Uncharacterized protein C15orf26 OS=Homo sapiens GN=C15orf26 PE=2 SV=1                                           |           | 23.84   |

|                        |                                                                                                                       |           |        |
|------------------------|-----------------------------------------------------------------------------------------------------------------------|-----------|--------|
| Q6P656-2               | CO026_HUMAN Isoform 2 of Uncharacterized protein C15orf26 OS=Homo sapiens GN=C15orf26                                 |           | 23.84  |
| Q6P6C2                 | ALKB5_HUMAN Probable alpha-ketoglutarate-dependent dioxygenase ABH5 OS=Homo sapiens GN=ALKBH5 PE=1 SV=1               |           |        |
| Q6P6C2-2               | ALKB5_HUMAN Isoform 2 of Probable alpha-ketoglutarate-dependent dioxygenase ABH5 OS=Homo sapiens GN=ALKBH5            |           |        |
| Q6P6C2;D3DXC6;Q6P6C2   | ALKB5_HUMAN Probable alpha-ketoglutarate-dependent dioxygenase ABH5 OS=Homo sapiens GN=ALKBH5 PE=1 SV=1;>tr D3DXC6    | 1.51E-12  |        |
| Q6P996                 | PDXD1_HUMAN Pyridoxal-dependent decarboxylase domain-containing protein 1 OS=Homo sapiens GN=PDXDC1 PE=1 SV=2         | 1.89E-211 |        |
| Q6P9B6                 | K1609_HUMAN TLD domain-containing protein KIAA1609 OS=Homo sapiens GN=KIAA1609 PE=1 SV=2                              |           | 27.49  |
| Q6P9B9                 | INT5_HUMAN Integrator complex subunit 5 OS=Homo sapiens GN=INTS5 PE=1 SV=1                                            |           |        |
| Q6PCB7                 | S27A1_HUMAN Long-chain fatty acid transport protein 1 OS=Homo sapiens GN=SLC27A1 PE=2 SV=1                            |           | 33.05  |
| Q6PCE3                 | PGM2L_HUMAN Glucose 1,6-bisphosphate synthase OS=Homo sapiens GN=PGM2L1 PE=1 SV=3                                     | 1.77E-07  |        |
| Q6PD62                 | CTR9_HUMAN RNA polymerase-associated protein CTR9 homolog OS=Homo sapiens GN=CTR9 PE=1 SV=1                           |           | 64.82  |
| Q6PD74                 | AAGAB_HUMAN Alpha- and gamma-adaptin-binding protein p34 OS=Homo sapiens GN=AAGAB PE=1 SV=1                           | 2.29E-07  |        |
| Q6PEY2                 | TBA3E_HUMAN Tubulin alpha-3E chain OS=Homo sapiens GN=TUBA3E PE=1 SV=2                                                |           | 861.23 |
| Q6PGP7                 | TTC37_HUMAN Tetratricopeptide repeat protein 37 OS=Homo sapiens GN=TTC37 PE=1 SV=1                                    | 2.13E-17  |        |
| Q6PI48                 | SYDM_HUMAN Aspartyl-tRNA synthetase, mitochondrial OS=Homo sapiens GN=DARS2 PE=1 SV=1                                 |           |        |
| Q6PI78                 | TMM65_HUMAN Transmembrane protein 65 OS=Homo sapiens GN=TMEM65 PE=1 SV=2                                              | 5.80E-13  |        |
| Q6PII5                 | HAGHL_HUMAN Hydroxyacylglutathione hydrolase-like protein OS=Homo sapiens GN=HAGHL PE=2 SV=1                          |           | 27.16  |
| Q6PII5-2               | HAGHL_HUMAN Isoform 2 of Hydroxyacylglutathione hydrolase-like protein OS=Homo sapiens GN=HAGHL                       |           |        |
| Q6PIU2                 | NCEH1_HUMAN Neutral cholesterol ester hydrolase 1 OS=Homo sapiens GN=NCEH1 PE=1 SV=3                                  |           | 390.53 |
| Q6PIU2-2               | NCEH1_HUMAN Isoform 2 of Neutral cholesterol ester hydrolase 1 OS=Homo sapiens GN=NCEH1                               |           | 390.53 |
| Q6PIU2-2;Q6PIU2;Q6PIU2 | 2 NCEH1_HUMAN Isoform 2 of Neutral cholesterol ester hydrolase 1 OS=Homo sapiens GN=NCEH1;>sp Q6PIU2 NCEH1_HUMAN Neut | 1.26E-45  |        |
| Q6PIU2-3               | NCEH1_HUMAN Isoform 3 of Neutral cholesterol ester hydrolase 1 OS=Homo sapiens GN=NCEH1                               |           | 279.43 |
| Q6PIW4                 | FIGL1_HUMAN Fidgetin-like protein 1 OS=Homo sapiens GN=FIGNL1 PE=1 SV=2                                               |           |        |
| Q6PIW4-2               | FIGL1_HUMAN Isoform 2 of Fidgetin-like protein 1 OS=Homo sapiens GN=FIGNL1                                            |           |        |
| Q6PIY5                 | CA228_HUMAN Uncharacterized protein C1orf228 OS=Homo sapiens GN=C1orf228 PE=2 SV=2                                    |           |        |
| Q6PIY5-2               | CA228_HUMAN Isoform 2 of Uncharacterized protein C1orf228 OS=Homo sapiens GN=C1orf228                                 |           |        |
| Q6PJG6                 | BRAT1_HUMAN BRCA1-associated ATM activator 1 OS=Homo sapiens GN=BRAT1 PE=1 SV=2                                       | 2.12E-18  |        |
| Q6PJG6-2               | BRAT1_HUMAN Isoform 2 of BRCA1-associated ATM activator 1 OS=Homo sapiens GN=BRAT1                                    |           | 9.45   |
| Q6PJG6;Q6PJG6-2        | BRAT1_HUMAN BRCA1-associated ATM activator 1 OS=Homo sapiens GN=BRAT1 PE=1 SV=2;>sp Q6PJG6-2 BRAT1_HUMAN Isoform :    | 2.05E-14  |        |
| Q6PJP8                 | DCR1A_HUMAN DNA cross-link repair 1A protein OS=Homo sapiens GN=DCLRE1A PE=1 SV=3                                     |           |        |
| Q6PJT7                 | ZC3HE_HUMAN Zinc finger CCCH domain-containing protein 14 OS=Homo sapiens GN=ZC3H14 PE=1 SV=1                         |           |        |
| Q6PJT7-2               | ZC3HE_HUMAN Isoform 2 of Zinc finger CCCH domain-containing protein 14 OS=Homo sapiens GN=ZC3H14                      |           |        |
| Q6PJT7-3               | ZC3HE_HUMAN Isoform 3 of Zinc finger CCCH domain-containing protein 14 OS=Homo sapiens GN=ZC3H14                      |           |        |
| Q6PJT7-4               | ZC3HE_HUMAN Isoform 4 of Zinc finger CCCH domain-containing protein 14 OS=Homo sapiens GN=ZC3H14                      |           |        |
| Q6PJT7-5               | ZC3HE_HUMAN Isoform 5 of Zinc finger CCCH domain-containing protein 14 OS=Homo sapiens GN=ZC3H14                      |           |        |
| Q6PK04                 | CC137_HUMAN Coiled-coil domain-containing protein 137 OS=Homo sapiens GN=CCDC137 PE=1 SV=1                            |           | 26.6   |
| Q6PK81                 | ZN773_HUMAN Zinc finger protein 773 OS=Homo sapiens GN=ZNF773 PE=2 SV=1                                               |           |        |
| Q6PK81-2               | ZN773_HUMAN Isoform 2 of Zinc finger protein 773 OS=Homo sapiens GN=ZNF773                                            |           |        |
| Q6PKG0                 | LARP1_HUMAN La-related protein 1 OS=Homo sapiens GN=LARP1 PE=1 SV=2                                                   |           | 277.28 |
| Q6PKG0-3               | LARP1_HUMAN Isoform 2 of La-related protein 1 OS=Homo sapiens GN=LARP1                                                |           | 226.81 |
| Q6PKG0;Q6PKG0-3        | LARP1_HUMAN La-related protein 1 OS=Homo sapiens GN=LARP1 PE=1 SV=2;>sp Q6PKG0-3 LARP1_HUMAN Isoform 2 of La-related  | 7.64E-48  |        |
| Q6PKX4                 | DOK6_HUMAN Docking protein 6 OS=Homo sapiens GN=DOK6 PE=1 SV=1                                                        |           |        |
| Q6PL18                 | ATAD2_HUMAN ATPase family AAA domain-containing protein 2 OS=Homo sapiens GN=ATAD2 PE=1 SV=1                          |           |        |
| Q6PL18-2               | ATAD2_HUMAN Isoform 2 of ATPase family AAA domain-containing protein 2 OS=Homo sapiens GN=ATAD2                       |           |        |
| Q6Q0C0                 | TRAF7_HUMAN E3 ubiquitin-protein ligase TRAF7 OS=Homo sapiens GN=TRAF7 PE=1 SV=1                                      |           |        |
| Q6Q0C0-2               | TRAF7_HUMAN Isoform 2 of E3 ubiquitin-protein ligase TRAF7 OS=Homo sapiens GN=TRAF7                                   |           |        |
| Q6Q759                 | SPG17_HUMAN Sperm-associated antigen 17 OS=Homo sapiens GN=SPAG17 PE=1 SV=1                                           |           |        |
| Q6QEF8                 | CORO6_HUMAN Coronin-6 OS=Homo sapiens GN=CORO6 PE=1 SV=2                                                              |           | 79.56  |
| Q6QEF8-2               | CORO6_HUMAN Isoform 2 of Coronin-6 OS=Homo sapiens GN=CORO6                                                           |           | 79.56  |
| Q6QEF8-3               | CORO6_HUMAN Isoform 3 of Coronin-6 OS=Homo sapiens GN=CORO6                                                           |           | 79.56  |
| Q6QEF8-4               | CORO6_HUMAN Isoform 4 of Coronin-6 OS=Homo sapiens GN=CORO6                                                           |           | 79.56  |
| Q6QEF8-5               | CORO6_HUMAN Isoform 5 of Coronin-6 OS=Homo sapiens GN=CORO6                                                           |           | 79.56  |
| Q6QEF8;Q6QEF8-5        | CORO6_HUMAN Coronin-6 OS=Homo sapiens GN=CORO6 PE=1 SV=2;>sp Q6QEF8-5 CORO6_HUMAN Isoform 5 of Coronin-6 OS=Ho        | 1.35E-08  |        |
| Q6R327-3;Q6R327        | 3 RICTR_HUMAN Isoform 3 of Rapamycin-insensitive companion of mTOR OS=Homo sapiens GN=RICTOR;>sp Q6R327 RICTR_HUMAN   | 1.96E-06  |        |
| Q6RW13                 | ATRAP_HUMAN Type-1 angiotensin II receptor-associated protein OS=Homo sapiens GN=AGTRAP PE=1 SV=1                     |           | 25.38  |
| Q6RW13-2               | ATRAP_HUMAN Isoform 2 of Type-1 angiotensin II receptor-associated protein OS=Homo sapiens GN=AGTRAP                  |           | 25.38  |
| Q6RW13-3               | ATRAP_HUMAN Isoform 3 of Type-1 angiotensin II receptor-associated protein OS=Homo sapiens GN=AGTRAP                  |           | 25.38  |
| Q6RW13-4               | ATRAP_HUMAN Isoform 4 of Type-1 angiotensin II receptor-associated protein OS=Homo sapiens GN=AGTRAP                  |           | 25.38  |
| Q6RW13-5               | ATRAP_HUMAN Isoform 5 of Type-1 angiotensin II receptor-associated protein OS=Homo sapiens GN=AGTRAP                  |           | 25.38  |
| Q6S545                 | POTEH_HUMAN POTE ankyrin domain family member H OS=Homo sapiens GN=POTEH PE=2 SV=3                                    |           |        |
| Q6S5H4                 | POTEB_HUMAN POTE ankyrin domain family member B OS=Homo sapiens GN=POTEB PE=2 SV=1                                    |           | 0.08   |
| Q6S5H4-2               | POTEB_HUMAN Isoform 2 of POTE ankyrin domain family member B OS=Homo sapiens GN=POTEB                                 |           | 0.08   |

|                       |                                                                                                                                                                                                                             |          |          |
|-----------------------|-----------------------------------------------------------------------------------------------------------------------------------------------------------------------------------------------------------------------------|----------|----------|
| Q6S5H4-3              | POTEB_HUMAN Isoform 3 of POTE ankyrin domain family member B OS=Homo sapiens GN=POTEB                                                                                                                                       |          | 0.08     |
| Q6S5H5                | POTEG_HUMAN POTE ankyrin domain family member G OS=Homo sapiens GN=POTEG PE=2 SV=5                                                                                                                                          |          |          |
| Q6S5H5-2              | POTEG_HUMAN Isoform 2 of POTE ankyrin domain family member G OS=Homo sapiens GN=POTEG                                                                                                                                       |          |          |
| Q6S8J3                | POTEE_HUMAN POTE ankyrin domain family member E OS=Homo sapiens GN=POTEE PE=1 SV=3                                                                                                                                          |          | 937.56   |
| Q6S8J3-2              | POTEE_HUMAN Isoform 2 of POTE ankyrin domain family member E OS=Homo sapiens GN=POTEE                                                                                                                                       |          | 24.09    |
| Q6S8J3-3              | POTEE_HUMAN Isoform 3 of POTE ankyrin domain family member E OS=Homo sapiens GN=POTEE                                                                                                                                       |          | 24.09    |
| Q6S8J3;A5A3E0;POCG38; | POTEE_HUMAN POTE ankyrin domain family member E OS=Homo sapiens GN=POTEE PE=1 SV=3;>sp A5A3E0 POTEF_HUMAN POTE ;                                                                                                            | 0        |          |
| Q6SA08                | TSSK4_HUMAN Testis-specific serine/threonine-protein kinase 4 OS=Homo sapiens GN=TSSK4 PE=1 SV=1                                                                                                                            |          |          |
| Q6SA08-2              | TSSK4_HUMAN Isoform 2 of Testis-specific serine/threonine-protein kinase 4 OS=Homo sapiens GN=TSSK4                                                                                                                         |          |          |
| Q6SA08-3              | TSSK4_HUMAN Isoform 3 of Testis-specific serine/threonine-protein kinase 4 OS=Homo sapiens GN=TSSK4                                                                                                                         |          |          |
| Q6STE5                | SMRD3_HUMAN SWI/SNF-related matrix-associated actin-dependent regulator of chromatin subfamily D member 3 OS=Homo sapiens GN=SMARCD3 PE=1 SV=1                                                                              |          |          |
| Q6STE5-2              | SMRD3_HUMAN Isoform 2 of SWI/SNF-related matrix-associated actin-dependent regulator of chromatin subfamily D member 3 OS=Homo sapiens GN=SMARCD3                                                                           |          |          |
| Q6UB35                | C1TM_HUMAN Monofunctional C1-tetrahydrofolate synthase, mitochondrial OS=Homo sapiens GN=MTHFD1L PE=1 SV=1                                                                                                                  |          | 48.45    |
| Q6UB35-2              | C1TM_HUMAN Isoform 2 of Monofunctional C1-tetrahydrofolate synthase, mitochondrial OS=Homo sapiens GN=MTHFD1L                                                                                                               |          | 2.13     |
| Q6UB98                | ANR12_HUMAN Ankyrin repeat domain-containing protein 12 OS=Homo sapiens GN=ANKRD12 PE=1 SV=3                                                                                                                                |          |          |
| Q6UB98-2              | ANR12_HUMAN Isoform 2 of Ankyrin repeat domain-containing protein 12 OS=Homo sapiens GN=ANKRD12                                                                                                                             |          |          |
| Q6UB99                | ANR11_HUMAN Ankyrin repeat domain-containing protein 11 OS=Homo sapiens GN=ANKRD11 PE=1 SV=3                                                                                                                                |          | 40.64    |
| Q6UN15                | FIP1_HUMAN Pre 3'-end-processing factor FIP1 OS=Homo sapiens GN=FIP1L1 PE=1 SV=1                                                                                                                                            |          |          |
| Q6UN15-3              | FIP1_HUMAN Isoform 3 of Pre 3'-end-processing factor FIP1 OS=Homo sapiens GN=FIP1L1                                                                                                                                         |          |          |
| Q6UN15-4              | FIP1_HUMAN Isoform 4 of Pre 3'-end-processing factor FIP1 OS=Homo sapiens GN=FIP1L1                                                                                                                                         |          |          |
| Q6UN15;Q6UN15-3;B4DIF | FIP1_HUMAN Pre-mRNA 3-end-processing factor FIP1 OS=Homo sapiens GN=FIP1L1 PE=1 SV=1;>sp Q6UN15-3 FIP1_HUMAN Isoform 3 of Pre-mRNA 3-end-processing factor FIP1 OS=Homo sapiens GN=FIP1L1 PE=1 SV=1                         | 1.58E-98 |          |
| Q6UVK1                | CSPG4_HUMAN Chondroitin sulfate proteoglycan 4 OS=Homo sapiens GN=CSPG4 PE=1 SV=2                                                                                                                                           |          | 37.18    |
| Q6UVY6                | MOXD1_HUMAN DBH-like monooxygenase protein 1 OS=Homo sapiens GN=MOXD1 PE=2 SV=1                                                                                                                                             |          | 18.11    |
| Q6UVY6-2              | MOXD1_HUMAN Isoform 2 of DBH-like monooxygenase protein 1 OS=Homo sapiens GN=MOXD1                                                                                                                                          |          | 18.11    |
| Q6UW49                | SPESP_HUMAN Sperm equatorial segment protein 1 OS=Homo sapiens GN=SPESP1 PE=1 SV=2                                                                                                                                          |          |          |
| Q6UW63                | KDEL1_HUMAN KDEL motif-containing protein 1 OS=Homo sapiens GN=KDEL1 PE=1 SV=1                                                                                                                                              |          |          |
| Q6UW68                | TM205_HUMAN Transmembrane protein 205 OS=Homo sapiens GN=TMEM205 PE=1 SV=1                                                                                                                                                  |          | 28.35    |
| Q6UW78                | CK083_HUMAN UPF0723 protein C11orf83 OS=Homo sapiens GN=C11orf83 PE=1 SV=2                                                                                                                                                  |          | 18.15    |
| Q6UWE0                | LRSAM1_HUMAN E3 ubiquitin-protein ligase LRSAM1 OS=Homo sapiens GN=LRSAM1 PE=1 SV=1                                                                                                                                         |          |          |
| Q6UWE0-2              | LRSAM1_HUMAN Isoform 2 of E3 ubiquitin-protein ligase LRSAM1 OS=Homo sapiens GN=LRSAM1                                                                                                                                      |          |          |
| Q6UWE0-3              | LRSAM1_HUMAN Isoform 3 of E3 ubiquitin-protein ligase LRSAM1 OS=Homo sapiens GN=LRSAM1                                                                                                                                      |          |          |
| Q6UWE0;Q6UWE0-2       | LRSAM1_HUMAN E3 ubiquitin-protein ligase LRSAM1 OS=Homo sapiens GN=LRSAM1 PE=1 SV=1;>sp Q6UWE0-2 LRSAM1_HUMAN Isoform 2 of E3 ubiquitin-protein ligase LRSAM1 OS=Homo sapiens GN=LRSAM1                                     | 3.17E-32 |          |
| Q6UWP2;Q6UWP2-2       | DHR11_HUMAN Dehydrogenase/reductase SDR family member 11 OS=Homo sapiens GN=DHRS11 PE=1 SV=1;>sp Q6UWP2-2 DHR11_HUMAN Isoform 2 of Dehydrogenase/reductase SDR family member 11 OS=Homo sapiens GN=DHRS11 PE=1 SV=1         | 1.11E-07 |          |
| Q6UWR7                | ENPP6_HUMAN Ectonucleotide pyrophosphatase/phosphodiesterase family member 6 OS=Homo sapiens GN=ENPP6 PE=2 SV=2                                                                                                             |          |          |
| Q6UWY5                | OLFL1_HUMAN Olfactomedin-like protein 1 OS=Homo sapiens GN=OLFML1 PE=1 SV=2                                                                                                                                                 |          | 4.44E-58 |
| Q6UWZ7                | F175A_HUMAN BRCA1-A complex subunit Abraxas OS=Homo sapiens GN=FAM175A PE=1 SV=2                                                                                                                                            |          |          |
| Q6UX04;Q6UX04-2       | CWC27_HUMAN Peptidyl-prolyl cis-trans isomerase CWC27 homolog OS=Homo sapiens GN=CWC27 PE=1 SV=1;>sp Q6UX04-2 CWC27_HUMAN Isoform 2 of Peptidyl-prolyl cis-trans isomerase CWC27 homolog OS=Homo sapiens GN=CWC27 PE=1 SV=1 | 4.18E-12 |          |
| Q6UX07;Q6UX07-2       | DHR13_HUMAN Dehydrogenase/reductase SDR family member 13 OS=Homo sapiens GN=DHRS13 PE=1 SV=1;>sp Q6UX07-2 DHR13_HUMAN Isoform 2 of Dehydrogenase/reductase SDR family member 13 OS=Homo sapiens GN=DHRS13 PE=1 SV=1         | 1.43E-26 |          |
| Q6UX27-2              | VSTM1_HUMAN Isoform 2 of V-set and transmembrane domain-containing protein 1 OS=Homo sapiens GN=VSTM1                                                                                                                       |          |          |
| Q6UX71;B4E367;B7WP84; | PXDC2_HUMAN Plexin domain-containing protein 2 OS=Homo sapiens GN=PLXDC2 PE=1 SV=1;>tr B4E367 B4E367_HUMAN cDNA FL                                                                                                          | 4.39E-08 |          |
| Q6UXG2;Q6UXG2-3;Q6UX  | K1324_HUMAN UPF0577 protein KIAA1324 OS=Homo sapiens GN=KIAA1324 PE=2 SV=2;>sp Q6UXG2-3 K1324_HUMAN Isoform 3 of UPF0577 protein KIAA1324 OS=Homo sapiens GN=KIAA1324 PE=2 SV=2                                             | 2.22E-23 |          |
| Q6UXH1                | CREL2_HUMAN Cysteine-rich with EGF-like domain protein 2 OS=Homo sapiens GN=CRELD2 PE=1 SV=1                                                                                                                                |          | 44.22    |
| Q6UXH1-2              | CREL2_HUMAN Isoform 2 of Cysteine-rich with EGF-like domain protein 2 OS=Homo sapiens GN=CRELD2                                                                                                                             |          | 13.65    |
| Q6UXH1-3              | CREL2_HUMAN Isoform 3 of Cysteine-rich with EGF-like domain protein 2 OS=Homo sapiens GN=CRELD2                                                                                                                             |          | 13.65    |
| Q6UXH1-4              | CREL2_HUMAN Isoform 4 of Cysteine-rich with EGF-like domain protein 2 OS=Homo sapiens GN=CRELD2                                                                                                                             |          | 44.22    |
| Q6UXH1-5              | CREL2_HUMAN Isoform 5 of Cysteine-rich with EGF-like domain protein 2 OS=Homo sapiens GN=CRELD2                                                                                                                             |          | 44.22    |
| Q6UXH1-5;A5GZA6;Q6UX  | 5 CREL2_HUMAN Isoform 5 of Cysteine-rich with EGF-like domain protein 2 OS=Homo sapiens GN=CRELD2;>tr A5GZA6 A5GZA6_HUMAN Isoform 5 of Cysteine-rich with EGF-like domain protein 2 OS=Homo sapiens GN=CRELD2               | 4.40E-05 |          |
| Q6UXH1-6              | CREL2_HUMAN Isoform 6 of Cysteine-rich with EGF-like domain protein 2 OS=Homo sapiens GN=CRELD2                                                                                                                             |          | 44.22    |
| Q6UXI9                | NPNT_HUMAN Nephronectin OS=Homo sapiens GN=NPNT PE=2 SV=3                                                                                                                                                                   |          | 21.67    |
| Q6UXI9-2              | NPNT_HUMAN Isoform 2 of Nephronectin OS=Homo sapiens GN=NPNT                                                                                                                                                                |          | 21.67    |
| Q6UXN9                | WDR82_HUMAN WD repeat-containing protein 82 OS=Homo sapiens GN=WDR82 PE=1 SV=1                                                                                                                                              |          | 223.56   |
| Q6UXV4                | APOOL_HUMAN Apolipoprotein O-like OS=Homo sapiens GN=APOOL PE=1 SV=1                                                                                                                                                        |          | 6.11E-10 |
| Q6UY01                | LRC31_HUMAN Leucine-rich repeat-containing protein 31 OS=Homo sapiens GN=LRR31 PE=2 SV=1                                                                                                                                    |          |          |
| Q6UY01-2              | LRC31_HUMAN Isoform 2 of Leucine-rich repeat-containing protein 31 OS=Homo sapiens GN=LRR31                                                                                                                                 |          |          |
| Q6UY01-3              | LRC31_HUMAN Isoform 3 of Leucine-rich repeat-containing protein 31 OS=Homo sapiens GN=LRR31                                                                                                                                 |          |          |
| Q6VUC0                | AP2E_HUMAN Transcription factor AP-2-epsilon OS=Homo sapiens GN=TFAP2E PE=2 SV=1                                                                                                                                            |          |          |
| Q6VY07                | PACS1_HUMAN Phosphofurin acidic cluster sorting protein 1 OS=Homo sapiens GN=PACS1 PE=1 SV=2                                                                                                                                |          | 28.44    |
| Q6VY07-2              | PACS1_HUMAN Isoform 2 of Phosphofurin acidic cluster sorting protein 1 OS=Homo sapiens GN=PACS1                                                                                                                             |          | 28.44    |
| Q6VY07-2;Q6VY07       | 2 PACS1_HUMAN Isoform 2 of Phosphofurin acidic cluster sorting protein 1 OS=Homo sapiens GN=PACS1;>sp Q6VY07 PACS1_HUMAN Isoform 2 of Phosphofurin acidic cluster sorting protein 1 OS=Homo sapiens GN=PACS1                | 2.70E-23 |          |
| Q6VY07;Q6VY07-2       | PACS1_HUMAN Phosphofurin acidic cluster sorting protein 1 OS=Homo sapiens GN=PACS1 PE=1 SV=2;>sp Q6VY07-2 PACS1_HUMAN Isoform 2 of Phosphofurin acidic cluster sorting protein 1 OS=Homo sapiens GN=PACS1                   | 2.03E-22 |          |
| Q6WCQ1-2;B9EG12;Q6WC  | 2 MPRIIP_HUMAN Isoform 2 of Myosin phosphatase Rho-interacting protein OS=Homo sapiens GN=MPRIIP;>tr B9EG12 B9EG12_HUMAN Isoform 2 of Myosin phosphatase Rho-interacting protein OS=Homo sapiens GN=MPRIIP                  | 2.95E-19 |          |

|                        |                                                                                                                          |           |
|------------------------|--------------------------------------------------------------------------------------------------------------------------|-----------|
| Q6WKZ4                 | RFIP1_HUMAN Rab11 family-interacting protein 1 OS=Homo sapiens GN=RAB11FIP1 PE=1 SV=2                                    | 159.03    |
| Q6WKZ4-1               | RFIP1_HUMAN Isoform 3 of Rab11 family-interacting protein 1 OS=Homo sapiens GN=RAB11FIP1                                 | 81.3      |
| Q6WKZ4-2               | RFIP1_HUMAN Isoform 4 of Rab11 family-interacting protein 1 OS=Homo sapiens GN=RAB11FIP1                                 | 72.68     |
| Q6WKZ4-3               | RFIP1_HUMAN Isoform 2 of Rab11 family-interacting protein 1 OS=Homo sapiens GN=RAB11FIP1                                 | 152.02    |
| Q6WKZ4-5               | RFIP1_HUMAN Isoform 5 of Rab11 family-interacting protein 1 OS=Homo sapiens GN=RAB11FIP1                                 | 5.05      |
| Q6WKZ4;Q307T1;Q6WKZ4   | RFIP1_HUMAN Rab11 family-interacting protein 1 OS=Homo sapiens GN=RAB11FIP1 PE=1 SV=2;>tr Q307T1 Q307T1_HUMAN RAB11      | 4.07E-17  |
| Q6WRX3                 | ZY11A_HUMAN Protein zyg-11 homolog A OS=Homo sapiens GN=ZYG11A PE=2 SV=3                                                 |           |
| Q6WRX3-2               | ZY11A_HUMAN Isoform 2 of Protein zyg-11 homolog A OS=Homo sapiens GN=ZYG11A                                              |           |
| Q6XE24                 | RBMS3_HUMAN RNA-binding motif, single-stranded-interacting protein 3 OS=Homo sapiens GN=RBMS3 PE=1 SV=1                  | 58.06     |
| Q6XE24-2               | RBMS3_HUMAN Isoform 2 of RNA-binding motif, single-stranded-interacting protein 3 OS=Homo sapiens GN=RBMS3               | 58.06     |
| Q6XE24-3               | RBMS3_HUMAN Isoform 3 of RNA-binding motif, single-stranded-interacting protein 3 OS=Homo sapiens GN=RBMS3               | 58.06     |
| Q6XE24-4               | RBMS3_HUMAN Isoform 4 of RNA-binding motif, single-stranded-interacting protein 3 OS=Homo sapiens GN=RBMS3               | 58.06     |
| Q6XE24;Q6XE24-2;Q6XE24 | RBMS3_HUMAN RNA-binding motif, single-stranded-interacting protein 3 OS=Homo sapiens GN=RBMS3 PE=1 SV=1;>sp Q6XE24-2 R   | 1.16E-05  |
| Q6XQN6;Q6XQN6-3;Q6XQN6 | PNCB_HUMAN Nicotinate phosphoribosyltransferase OS=Homo sapiens GN=NAPRT1 PE=1 SV=2;>sp Q6XQN6-3 PNCB_HUMAN Isoform      | 2.07E-35  |
| Q6XZF7                 | DNMBP_HUMAN Dynamin-binding protein OS=Homo sapiens GN=DNMBP PE=1 SV=1                                                   | 29.6      |
| Q6XZF7-2               | DNMBP_HUMAN Isoform 2 of Dynamin-binding protein OS=Homo sapiens GN=DNMBP                                                | 29.6      |
| Q6XZF7;Q6XZF7-2        | DNMBP_HUMAN Dynamin-binding protein OS=Homo sapiens GN=DNMBP PE=1 SV=1;>sp Q6XZF7-2 DNMBP_HUMAN Isoform 2 of Dy          | 9.55E-78  |
| Q6Y1H2                 | HACD2_HUMAN 3-hydroxyacyl-CoA dehydratase 2 OS=Homo sapiens GN=PTPLB PE=1 SV=1                                           | 1.21E-08  |
| Q6Y7W6-3;A6H8W4;Q6Y7   | 3 PERQ2_HUMAN Isoform 2 of PERQ amino acid-rich with GYF domain-containing protein 2 OS=Homo sapiens GN=GIGYF2;>tr A6H8V | 4.04E-44  |
| Q6YHK3                 | CD109_HUMAN CD109 antigen OS=Homo sapiens GN=CD109 PE=1 SV=2                                                             |           |
| Q6YHK3-2               | CD109_HUMAN Isoform 2 of CD109 antigen OS=Homo sapiens GN=CD109                                                          |           |
| Q6YHK3-3               | CD109_HUMAN Isoform 3 of CD109 antigen OS=Homo sapiens GN=CD109                                                          |           |
| Q6YHK3-4               | CD109_HUMAN Isoform 4 of CD109 antigen OS=Homo sapiens GN=CD109                                                          |           |
| Q6YHK3;Q6YHK3-4;Q6YHK3 | CD109_HUMAN CD109 antigen OS=Homo sapiens GN=CD109 PE=1 SV=2;>sp Q6YHK3-4 CD109_HUMAN Isoform 4 of CD109 antigen         | 4.93E-12  |
| Q6YHU6                 | THADA_HUMAN Thyroid adenoma-associated protein OS=Homo sapiens GN=THADA PE=1 SV=1                                        |           |
| Q6YHU6-2               | THADA_HUMAN Isoform 2 of Thyroid adenoma-associated protein OS=Homo sapiens GN=THADA                                     |           |
| Q6YHU6-3               | THADA_HUMAN Isoform 3 of Thyroid adenoma-associated protein OS=Homo sapiens GN=THADA                                     |           |
| Q6YHU6-4               | THADA_HUMAN Isoform 4 of Thyroid adenoma-associated protein OS=Homo sapiens GN=THADA                                     |           |
| Q6YHU6-5               | THADA_HUMAN Isoform 5 of Thyroid adenoma-associated protein OS=Homo sapiens GN=THADA                                     |           |
| Q6YN16                 | HSDL2_HUMAN Hydroxysteroid dehydrogenase-like protein 2 OS=Homo sapiens GN=HSDL2 PE=1 SV=1                               | 193.11    |
| Q6YN16-2               | HSDL2_HUMAN Isoform 2 of Hydroxysteroid dehydrogenase-like protein 2 OS=Homo sapiens GN=HSDL2                            | 162.76    |
| Q6YN16;B2R923;Q6YN16   | HSDL2_HUMAN Hydroxysteroid dehydrogenase-like protein 2 OS=Homo sapiens GN=HSDL2 PE=1 SV=1;>tr B2R923 B2R923_HUMAN       | 2.68E-240 |
| Q6YP21                 | KAT3_HUMAN Kynurenine--oxoglutarate transaminase 3 OS=Homo sapiens GN=CCBL2 PE=1 SV=1                                    | 5.20E-35  |
| Q6ZMC9                 | SIG15_HUMAN Sialic acid-binding Ig-like lectin 15 OS=Homo sapiens GN=SIGLEC15 PE=1 SV=1                                  |           |
| Q6ZMI0                 | KLRAQ_HUMAN KLRAQ motif-containing protein 1 OS=Homo sapiens GN=KLRAQ1 PE=1 SV=1                                         | 34.36     |
| Q6ZMI0-2               | KLRAQ_HUMAN Isoform 2 of KLRAQ motif-containing protein 1 OS=Homo sapiens GN=KLRAQ1                                      | 34.36     |
| Q6ZMI0-3               | KLRAQ_HUMAN Isoform 3 of KLRAQ motif-containing protein 1 OS=Homo sapiens GN=KLRAQ1                                      | 34.36     |
| Q6ZMI0-4               | KLRAQ_HUMAN Isoform 4 of KLRAQ motif-containing protein 1 OS=Homo sapiens GN=KLRAQ1                                      | 34.36     |
| Q6ZMI0;Q6ZMI0-2;B7ZKY  | KLRAQ_HUMAN KLRAQ motif-containing protein 1 OS=Homo sapiens GN=KLRAQ1 PE=1 SV=1;>sp Q6ZMI0-2 KLRAQ_HUMAN Isoform        | 2.22E-10  |
| Q6ZMK1;Q6ZMK1-2        | CYHR1_HUMAN Cysteine and histidine-rich protein 1 OS=Homo sapiens GN=CYHR1 PE=2 SV=2;>sp Q6ZMK1-2 CYHR1_HUMAN Isoform    | 3.91E-13  |
| Q6ZMR3                 | LDH6A_HUMAN L-lactate dehydrogenase A-like 6A OS=Homo sapiens GN=LDHAL6A PE=2 SV=1                                       | 106.15    |
| Q6ZMU5;Q6ZMU5-2        | TRI72_HUMAN Tripartite motif-containing protein 72 OS=Homo sapiens GN=TRIM72 PE=1 SV=2;>sp Q6ZMU5-2 TRI72_HUMAN Isoform  | 3.64E-63  |
| Q6ZMV9-2               | KIF6_HUMAN Isoform 2 of Kinesin-like protein KIF6 OS=Homo sapiens GN=KIF6                                                |           |
| Q6ZMV9-4               | KIF6_HUMAN Isoform 4 of Kinesin-like protein KIF6 OS=Homo sapiens GN=KIF6                                                |           |
| Q6ZMW3                 | EMAL6_HUMAN Echinoderm microtubule-associated protein-like 6 OS=Homo sapiens GN=EML6 PE=2 SV=2                           |           |
| Q6ZMW3-2               | EMAL6_HUMAN Isoform 2 of Echinoderm microtubule-associated protein-like 6 OS=Homo sapiens GN=EML6                        |           |
| Q6ZMZ3                 | SYNE3_HUMAN Nesprin-3 OS=Homo sapiens GN=C14orf49 PE=1 SV=2                                                              |           |
| Q6ZMZ3-2               | SYNE3_HUMAN Isoform 2 of Nesprin-3 OS=Homo sapiens GN=C14orf49                                                           |           |
| Q6ZMZ3-3               | SYNE3_HUMAN Isoform 3 of Nesprin-3 OS=Homo sapiens GN=C14orf49                                                           |           |
| Q6ZN17                 | LN28B_HUMAN Protein lin-28 homolog B OS=Homo sapiens GN=LIN28B PE=1 SV=1                                                 |           |
| Q6ZN17-2               | LN28B_HUMAN Isoform 2 of Protein lin-28 homolog B OS=Homo sapiens GN=LIN28B                                              |           |
| Q6ZNG1                 | ZN600_HUMAN Zinc finger protein 600 OS=Homo sapiens GN=ZNF600 PE=1 SV=2                                                  |           |
| Q6ZNJ1;Q6ZNJ1-2;Q6ZNJ1 | NBEL2_HUMAN Neurobeachin-like protein 2 OS=Homo sapiens GN=NBEAL2 PE=1 SV=2;>sp Q6ZNJ1-2 NBEL2_HUMAN Isoform 2 of N      | 3.93E-10  |
| Q6ZR08                 | DYH12_HUMAN Dynein heavy chain 12, axonemal OS=Homo sapiens GN=DNAH12 PE=1 SV=2                                          |           |
| Q6ZR08-2               | DYH12_HUMAN Isoform 2 of Dynein heavy chain 12, axonemal OS=Homo sapiens GN=DNAH12                                       |           |
| Q6ZR08-3               | DYH12_HUMAN Isoform 3 of Dynein heavy chain 12, axonemal OS=Homo sapiens GN=DNAH12                                       |           |
| Q6ZR08-4               | DYH12_HUMAN Isoform 4 of Dynein heavy chain 12, axonemal OS=Homo sapiens GN=DNAH12                                       |           |
| Q6ZRF8                 | RN207_HUMAN RING finger protein 207 OS=Homo sapiens GN=RNF207 PE=1 SV=2                                                  | 30.97     |
| Q6ZRP7                 | QSOX2_HUMAN Sulfhydryl oxidase 2 OS=Homo sapiens GN=QSOX2 PE=1 SV=3                                                      | 111.54    |
| Q6ZRQ5                 | MMS22_HUMAN Protein MMS22-like OS=Homo sapiens GN=MMS22L PE=1 SV=3                                                       |           |
| Q6ZRS2                 | SRCAP_HUMAN Helicase SRCAP OS=Homo sapiens GN=SRCAP PE=1 SV=3                                                            |           |

|                         |                                                                                                                             |            |       |
|-------------------------|-----------------------------------------------------------------------------------------------------------------------------|------------|-------|
| Q6ZRS2-2                | SRCAP_HUMAN Isoform 2 of Helicase SRCAP OS=Homo sapiens GN=SRCAP                                                            |            |       |
| Q6ZRS2-3                | SRCAP_HUMAN Isoform 3 of Helicase SRCAP OS=Homo sapiens GN=SRCAP                                                            |            |       |
| Q6ZS17;Q6ZS17-2         | FA65A_HUMAN Protein FAM65A OS=Homo sapiens GN=FAM65A PE=1 SV=1;>sp Q6ZS17-2 FA65A_HUMAN Isoform 2 of Protein FAM6           | 1.19E-95   |       |
| Q6ZS30                  | NBEL1_HUMAN Neurobeachin-like protein 1 OS=Homo sapiens GN=NBEAL1 PE=2 SV=3                                                 |            | 27.64 |
| Q6ZS30-1                | NBEL1_HUMAN Isoform 1 of Neurobeachin-like protein 1 OS=Homo sapiens GN=NBEAL1                                              |            | 27.64 |
| Q6ZSJ8                  | CA122_HUMAN Uncharacterized protein C1orf122 OS=Homo sapiens GN=C1orf122 PE=2 SV=2                                          |            | 22.34 |
| Q6ZSR9                  | YJ005_HUMAN Uncharacterized protein FLJ45252 OS=Homo sapiens PE=1 SV=2                                                      |            | 17.69 |
| Q6ZSZ5                  | ARHGI_HUMAN Rho guanine nucleotide exchange factor 18 OS=Homo sapiens GN=ARHGEF18 PE=1 SV=3                                 |            |       |
| Q6ZSZ5-2                | ARHGI_HUMAN Isoform 2 of Rho guanine nucleotide exchange factor 18 OS=Homo sapiens GN=ARHGEF18                              |            |       |
| Q6ZSZ5-3                | ARHGI_HUMAN Isoform 3 of Rho guanine nucleotide exchange factor 18 OS=Homo sapiens GN=ARHGEF18                              |            |       |
| Q6ZSZ5;A8MV62;Q6ZSZ5    | ARHGI_HUMAN Rho guanine nucleotide exchange factor 18 OS=Homo sapiens GN=ARHGEF18 PE=1 SV=3;>tr A8MV62 A8MV62_HUM           | 2.14E-26   |       |
| Q6ZT21                  | TMPPE_HUMAN Transmembrane protein with metallophosphoesterase domain OS=Homo sapiens GN=TMPPE PE=2 SV=2                     |            | 27.9  |
| Q6ZT21-2                | TMPPE_HUMAN Isoform 2 of Transmembrane protein with metallophosphoesterase domain OS=Homo sapiens GN=TMPPE                  |            | 27.9  |
| Q6ZTR5                  | CX022_HUMAN Uncharacterized protein CXorf22 OS=Homo sapiens GN=CXorf22 PE=2 SV=3                                            |            | 25.45 |
| Q6ZTR5-2                | CX022_HUMAN Isoform 2 of Uncharacterized protein CXorf22 OS=Homo sapiens GN=CXorf22                                         |            | 25.45 |
| Q6ZTW0                  | TPGS1_HUMAN Tubulin polyglutamylase complex subunit 1 OS=Homo sapiens GN=C19orf20 PE=2 SV=2                                 |            |       |
| Q6ZTW0-2                | TPGS1_HUMAN Isoform 2 of Tubulin polyglutamylase complex subunit 1 OS=Homo sapiens GN=C19orf20                              |            |       |
| Q6ZU11-2                | YD002_HUMAN Isoform 2 of Uncharacterized protein FLJ44066 OS=Homo sapiens                                                   |            |       |
| Q6ZU15                  | SEP14_HUMAN Septin-14 OS=Homo sapiens GN=SEPT14 PE=1 SV=2                                                                   |            | 55.93 |
| Q6ZUB1                  | CI079_HUMAN FAM75-like protein C9orf79 OS=Homo sapiens GN=C9orf79 PE=2 SV=2                                                 |            |       |
| Q6ZUI0                  | TPRG1_HUMAN Tumor protein p63-regulated gene 1 protein OS=Homo sapiens GN=TPRG1 PE=2 SV=1                                   | 0.00024023 |       |
| Q6ZUJ8;Q6ZUJ8-2         | BCAP_HUMAN Phosphoinositide 3-kinase adapter protein 1 OS=Homo sapiens GN=PIK3AP1 PE=1 SV=2;>sp Q6ZUJ8-2 BCAP_HUMAN         | 1.57E-12   |       |
| Q6ZUL3                  | CH086_HUMAN Uncharacterized protein C8orf86 OS=Homo sapiens GN=C8orf86 PE=2 SV=1                                            |            |       |
| Q6ZUL3-2                | CH086_HUMAN Isoform 2 of Uncharacterized protein C8orf86 OS=Homo sapiens GN=C8orf86                                         |            |       |
| Q6ZUT6                  | CO052_HUMAN Uncharacterized protein C15orf52 OS=Homo sapiens GN=C15orf52 PE=1 SV=1                                          |            | 69.21 |
| Q6ZUT6-2                | CO052_HUMAN Isoform 2 of Uncharacterized protein C15orf52 OS=Homo sapiens GN=C15orf52                                       |            | 13.47 |
| Q6ZUT6-3                | CO052_HUMAN Isoform 3 of Uncharacterized protein C15orf52 OS=Homo sapiens GN=C15orf52                                       |            | 27.61 |
| Q6ZUT6-4                | CO052_HUMAN Isoform 4 of Uncharacterized protein C15orf52 OS=Homo sapiens GN=C15orf52                                       |            | 41.08 |
| Q6ZUT6;Q6ZUT6-4;Q6ZU    | CO052_HUMAN Uncharacterized protein C15orf52 OS=Homo sapiens GN=C15orf52 PE=1 SV=1;>sp Q6ZUT6-4 CO052_HUMAN Isofor          | 2.42E-10   |       |
| Q6ZUT9                  | DEN5B_HUMAN DENN domain-containing protein 5B OS=Homo sapiens GN=DENND5B PE=1 SV=2                                          |            |       |
| Q6ZUT9-2                | DEN5B_HUMAN Isoform 2 of DENN domain-containing protein 5B OS=Homo sapiens GN=DENND5B                                       |            |       |
| Q6ZUT9-3                | DEN5B_HUMAN Isoform 3 of DENN domain-containing protein 5B OS=Homo sapiens GN=DENND5B                                       |            |       |
| Q6ZUT9-4                | DEN5B_HUMAN Isoform 4 of DENN domain-containing protein 5B OS=Homo sapiens GN=DENND5B                                       |            |       |
| Q6ZV73;Q6ZV73-2;A4FVC   | FGD6_HUMAN FYVE, RhoGEF and PH domain-containing protein 6 OS=Homo sapiens GN=FGD6 PE=1 SV=2;>sp Q6ZV73-2 FGD6_HU           | 2.21E-06   |       |
| Q6ZVC0                  | CG051_HUMAN Uncharacterized protein C7orf51 OS=Homo sapiens GN=C7orf51 PE=1 SV=1                                            |            |       |
| Q6ZVC0-2                | CG051_HUMAN Isoform 2 of Uncharacterized protein C7orf51 OS=Homo sapiens GN=C7orf51                                         |            |       |
| Q6ZVD8                  | PHLP2_HUMAN PH domain leucine-rich repeat-containing protein phosphatase 2 OS=Homo sapiens GN=PHLPP2 PE=1 SV=3              |            |       |
| Q6ZVD8-2                | PHLP2_HUMAN Isoform 2 of PH domain leucine-rich repeat-containing protein phosphatase 2 OS=Homo sapiens GN=PHLPP2           |            |       |
| Q6ZVD8-3                | PHLP2_HUMAN Isoform 3 of PH domain leucine-rich repeat-containing protein phosphatase 2 OS=Homo sapiens GN=PHLPP2           |            |       |
| Q6ZVF9                  | GRIN3_HUMAN G protein-regulated inducer of neurite outgrowth 3 OS=Homo sapiens GN=GPRIN3 PE=2 SV=2                          |            |       |
| Q6ZW49                  | PAXI1_HUMAN PAX-interacting protein 1 OS=Homo sapiens GN=PAXIP1 PE=1 SV=2                                                   |            | 19.65 |
| Q6ZW49-1                | PAXI1_HUMAN Isoform 2 of PAX-interacting protein 1 OS=Homo sapiens GN=PAXIP1                                                |            | 19.65 |
| Q6ZW49-2                | PAXI1_HUMAN Isoform 3 of PAX-interacting protein 1 OS=Homo sapiens GN=PAXIP1                                                |            | 19.65 |
| Q6ZW49-3                | PAXI1_HUMAN Isoform 4 of PAX-interacting protein 1 OS=Homo sapiens GN=PAXIP1                                                |            | 19.65 |
| Q6ZW49-4                | PAXI1_HUMAN Isoform 5 of PAX-interacting protein 1 OS=Homo sapiens GN=PAXIP1                                                |            | 19.65 |
| Q6ZXV5                  | TMTC3_HUMAN Transmembrane and TPR repeat-containing protein 3 OS=Homo sapiens GN=TMTC3 PE=1 SV=2                            |            |       |
| Q6ZXV5-2                | TMTC3_HUMAN Isoform 2 of Transmembrane and TPR repeat-containing protein 3 OS=Homo sapiens GN=TMTC3                         |            |       |
| Q702N8                  | XIRP1_HUMAN Xin actin-binding repeat-containing protein 1 OS=Homo sapiens GN=XIRP1 PE=1 SV=1                                |            |       |
| Q702N8-2                | XIRP1_HUMAN Isoform B of Xin actin-binding repeat-containing protein 1 OS=Homo sapiens GN=XIRP1                             |            |       |
| Q702N8;Q702N8-2         | XIRP1_HUMAN Xin actin-binding repeat-containing protein 1 OS=Homo sapiens GN=XIRP1 PE=1 SV=1;>sp Q702N8-2 XIRP1_HUMAN       | 3.96E-11   |       |
| Q709C8;Q709C8-3;Q709C   | VP13C_HUMAN Vacuolar protein sorting-associated protein 13C OS=Homo sapiens GN=VPS13C PE=1 SV=1;>sp Q709C8-3 VP13C_HU       | 4.68E-11   |       |
| Q70E73                  | RAPH1_HUMAN Ras-associated and pleckstrin homology domains-containing protein 1 OS=Homo sapiens GN=RAPH1 PE=1 SV=3          |            |       |
| Q70E73-2                | RAPH1_HUMAN Isoform RMO1 of Ras-associated and pleckstrin homology domains-containing protein 1 OS=Homo sapiens GN=RAPH1    |            |       |
| Q70E73-3                | RAPH1_HUMAN Isoform RMO1a of Ras-associated and pleckstrin homology domains-containing protein 1 OS=Homo sapiens GN=RAPH1   |            |       |
| Q70E73-4                | RAPH1_HUMAN Isoform RMO1b of Ras-associated and pleckstrin homology domains-containing protein 1 OS=Homo sapiens GN=RAPH1   |            | 27.69 |
| Q70E73-5                | RAPH1_HUMAN Isoform RMO1c of Ras-associated and pleckstrin homology domains-containing protein 1 OS=Homo sapiens GN=RAPH1   |            |       |
| Q70E73-6                | RAPH1_HUMAN Isoform RMO1ab of Ras-associated and pleckstrin homology domains-containing protein 1 OS=Homo sapiens GN=RAPH1  |            | 27.69 |
| Q70E73-6;Q70E73-9;Q7016 | RAPH1_HUMAN Isoform RMO1ab of Ras-associated and pleckstrin homology domains-containing protein 1 OS=Homo sapiens GN=R/     | 1.48E-16   |       |
| Q70E73-7                | RAPH1_HUMAN Isoform RMO1ac of Ras-associated and pleckstrin homology domains-containing protein 1 OS=Homo sapiens GN=RAPH1  |            |       |
| Q70E73-8                | RAPH1_HUMAN Isoform RMO1bc of Ras-associated and pleckstrin homology domains-containing protein 1 OS=Homo sapiens GN=RAPH1  |            | 27.69 |
| Q70E73-9                | RAPH1_HUMAN Isoform RMO1abc of Ras-associated and pleckstrin homology domains-containing protein 1 OS=Homo sapiens GN=RAPH1 |            | 27.69 |



|                        |                                                                                                                             |           |         |
|------------------------|-----------------------------------------------------------------------------------------------------------------------------|-----------|---------|
| Q70E73;Q70E73-2;Q70E73 | RAPH1_HUMAN Ras-associated and pleckstrin homology domains-containing protein 1 OS=Homo sapiens GN=RAPH1 PE=1 SV=3;>sp      | 1.11E-32  |         |
| Q70J99                 | UN13D_HUMAN Protein unc-13 homolog D OS=Homo sapiens GN=UNC13D PE=1 SV=1                                                    |           | 44.2    |
| Q70J99-2               | UN13D_HUMAN Isoform 2 of Protein unc-13 homolog D OS=Homo sapiens GN=UNC13D                                                 |           | 44.2    |
| Q70J99-3               | UN13D_HUMAN Isoform 3 of Protein unc-13 homolog D OS=Homo sapiens GN=UNC13D                                                 |           | 44.2    |
| Q70J99-3;Q70J99        | 3 UN13D_HUMAN Isoform 3 of Protein unc-13 homolog D OS=Homo sapiens GN=UNC13D;>sp Q70J99 UN13D_HUMAN Protein unc-1          | 2.06E-107 |         |
| Q70UQ0                 | IKIP_HUMAN Inhibitor of nuclear factor kappa-B kinase-interacting protein OS=Homo sapiens GN=IKBIP PE=1 SV=1                |           | 552.45  |
| Q70UQ0-2               | IKIP_HUMAN Isoform 2 of Inhibitor of nuclear factor kappa-B kinase-interacting protein OS=Homo sapiens GN=IKBIP             |           | 406.12  |
| Q70UQ0-3               | IKIP_HUMAN Isoform 3 of Inhibitor of nuclear factor kappa-B kinase-interacting protein OS=Homo sapiens GN=IKBIP             |           | 23.91   |
| Q70UQ0-4               | IKIP_HUMAN Isoform 4 of Inhibitor of nuclear factor kappa-B kinase-interacting protein OS=Homo sapiens GN=IKBIP             |           | 680.44  |
| Q70UQ0;Q3B7K3;Q70UQ0   | IKIP_HUMAN Inhibitor of nuclear factor kappa-B kinase-interacting protein OS=Homo sapiens GN=IKBIP PE=1 SV=1;>tr Q3B7K3 Q3E | 1.10E-152 |         |
| Q70Z53                 | F10C1_HUMAN Protein FRA10AC1 OS=Homo sapiens GN=FRA10AC1 PE=1 SV=3                                                          |           |         |
| Q70Z53-2               | F10C1_HUMAN Isoform 2 of Protein FRA10AC1 OS=Homo sapiens GN=FRA10AC1                                                       |           |         |
| Q70Z53-3               | F10C1_HUMAN Isoform 3 of Protein FRA10AC1 OS=Homo sapiens GN=FRA10AC1                                                       |           |         |
| Q70Z53-4               | F10C1_HUMAN Isoform 4 of Protein FRA10AC1 OS=Homo sapiens GN=FRA10AC1                                                       |           |         |
| Q70Z53-5               | F10C1_HUMAN Isoform 5 of Protein FRA10AC1 OS=Homo sapiens GN=FRA10AC1                                                       |           |         |
| Q712K3                 | UB2R2_HUMAN Ubiquitin-conjugating enzyme E2 R2 OS=Homo sapiens GN=UBE2R2 PE=1 SV=1                                          | 3.03E-07  |         |
| Q71DI3                 | H32_HUMAN Histone H3.2 OS=Homo sapiens GN=HIST2H3A PE=1 SV=3                                                                |           | 180.26  |
| Q71F56                 | MD13L_HUMAN Mediator of RNA polymerase II transcription subunit 13-like OS=Homo sapiens GN=MED13L PE=1 SV=1                 |           | 30.39   |
| Q71RC2                 | LARP4_HUMAN La-related protein 4 OS=Homo sapiens GN=LARP4 PE=1 SV=3                                                         |           | 132.01  |
| Q71RC2-2               | LARP4_HUMAN Isoform 2 of La-related protein 4 OS=Homo sapiens GN=LARP4                                                      |           | 87.53   |
| Q71RC2-3               | LARP4_HUMAN Isoform 3 of La-related protein 4 OS=Homo sapiens GN=LARP4                                                      |           | 132.01  |
| Q71RC2-4               | LARP4_HUMAN Isoform 4 of La-related protein 4 OS=Homo sapiens GN=LARP4                                                      |           | 132.01  |
| Q71RC2-4;Q71RC2;Q71RC2 | 4 LARP4_HUMAN Isoform 4 of La-related protein 4 OS=Homo sapiens GN=LARP4;>sp Q71RC2 LARP4_HUMAN La-related protein 4 O      | 3.73E-23  |         |
| Q71RS6                 | NCKX5_HUMAN Sodium/potassium/calcium exchanger 5 OS=Homo sapiens GN=SLC24A5 PE=1 SV=1                                       |           | 25      |
| Q71U36                 | TBA1A_HUMAN Tubulin alpha-1A chain OS=Homo sapiens GN=TUBA1A PE=1 SV=1                                                      |           | 1221.3  |
| Q71UI9                 | H2AV_HUMAN Histone H2A.V OS=Homo sapiens GN=H2AFV PE=1 SV=3                                                                 |           | 250.74  |
| Q71UM5                 | RS27L_HUMAN 40S ribosomal protein S27-like OS=Homo sapiens GN=RPS27L PE=1 SV=3                                              |           | 306.4   |
| Q75LS8                 | FKB9L_HUMAN Putative FK506-binding protein 9-like protein OS=Homo sapiens GN=FKBP9L PE=5 SV=1                               |           |         |
| Q75QN2                 | INT8_HUMAN Integrator complex subunit 8 OS=Homo sapiens GN=INTS8 PE=1 SV=1                                                  |           |         |
| Q75QN2-2               | INT8_HUMAN Isoform 2 of Integrator complex subunit 8 OS=Homo sapiens GN=INTS8                                               |           |         |
| Q75V66                 | ANO5_HUMAN Anoctamin-5 OS=Homo sapiens GN=ANO5 PE=1 SV=1                                                                    |           |         |
| Q76FK4                 | NOL8_HUMAN Nucleolar protein 8 OS=Homo sapiens GN=NOL8 PE=1 SV=1                                                            |           |         |
| Q76FK4-2               | NOL8_HUMAN Isoform 2 of Nucleolar protein 8 OS=Homo sapiens GN=NOL8                                                         |           |         |
| Q76FK4-3               | NOL8_HUMAN Isoform 3 of Nucleolar protein 8 OS=Homo sapiens GN=NOL8                                                         |           |         |
| Q76FK4-4               | NOL8_HUMAN Isoform 4 of Nucleolar protein 8 OS=Homo sapiens GN=NOL8                                                         |           |         |
| Q76KD6                 | SPERI_HUMAN Speriolin OS=Homo sapiens GN=SPATC1 PE=2 SV=2                                                                   | 1.09E-08  |         |
| Q76M96                 | CCD80_HUMAN Coiled-coil domain-containing protein 80 OS=Homo sapiens GN=CCDC80 PE=1 SV=1                                    |           |         |
| Q76M96-2               | CCD80_HUMAN Isoform 2 of Coiled-coil domain-containing protein 80 OS=Homo sapiens GN=CCDC80                                 |           |         |
| Q7KYR7                 | BT2A1_HUMAN Butyrophilin subfamily 2 member A1 OS=Homo sapiens GN=BTN2A1 PE=1 SV=3                                          |           | 54.17   |
| Q7KYR7-1               | BT2A1_HUMAN Isoform 2 of Butyrophilin subfamily 2 member A1 OS=Homo sapiens GN=BTN2A1                                       |           | 50.26   |
| Q7KYR7-3               | BT2A1_HUMAN Isoform 3 of Butyrophilin subfamily 2 member A1 OS=Homo sapiens GN=BTN2A1                                       |           | 54.17   |
| Q7KZ85                 | SPT6H_HUMAN Transcription elongation factor SPT6 OS=Homo sapiens GN=SUPT6H PE=1 SV=2                                        |           | 109.68  |
| Q7KZ85-2               | SPT6H_HUMAN Isoform 2 of Transcription elongation factor SPT6 OS=Homo sapiens GN=SUPT6H                                     |           | 34.05   |
| Q7KZ85-3               | SPT6H_HUMAN Isoform 3 of Transcription elongation factor SPT6 OS=Homo sapiens GN=SUPT6H                                     |           |         |
| Q7KZF4                 | SND1_HUMAN Staphylococcal nuclease domain-containing protein 1 OS=Homo sapiens GN=SND1 PE=1 SV=1                            |           | 1697.89 |
| Q7KZI7;Q7KZI7-8;Q7KZI7 | MARK2_HUMAN Serine/threonine-protein kinase MARK2 OS=Homo sapiens GN=MARK2 PE=1 SV=2;>sp Q7KZI7-8 MARK2_HUMAN Is            | 5.27E-14  |         |
| Q7L014                 | DDX46_HUMAN Probable ATP-dependent RNA helicase DDX46 OS=Homo sapiens GN=DDX46 PE=1 SV=2                                    |           | 363.92  |
| Q7L0Y3                 | MRRP1_HUMAN Mitochondrial ribonuclease P protein 1 OS=Homo sapiens GN=RG9MTD1 PE=1 SV=2                                     |           |         |
| Q7L1Q6                 | BZW1_HUMAN Basic leucine zipper and W2 domain-containing protein 1 OS=Homo sapiens GN=BZW1 PE=1 SV=1                        |           | 572.82  |
| Q7L1Q6-2               | BZW1_HUMAN Isoform 2 of Basic leucine zipper and W2 domain-containing protein 1 OS=Homo sapiens GN=BZW1                     |           | 543.17  |
| Q7L1Q6;Q7L1Q6-2        | BZW1_HUMAN Basic leucine zipper and W2 domain-containing protein 1 OS=Homo sapiens GN=BZW1 PE=1 SV=1;>sp Q7L1Q6-2 BZ        | 2.39E-83  |         |
| Q7L273                 | KCTD9_HUMAN BTB/POZ domain-containing protein KCTD9 OS=Homo sapiens GN=KCTD9 PE=2 SV=1                                      | 3.52E-09  |         |
| Q7L2E3                 | DHX30_HUMAN Putative ATP-dependent RNA helicase DHX30 OS=Homo sapiens GN=DHX30 PE=1 SV=1                                    |           | 156.38  |
| Q7L2E3-2               | DHX30_HUMAN Isoform 2 of Putative ATP-dependent RNA helicase DHX30 OS=Homo sapiens GN=DHX30                                 |           | 156.38  |
| Q7L2E3-2;Q7L2E3;C9JC37 | 2 DHX30_HUMAN Isoform 2 of Putative ATP-dependent RNA helicase DHX30 OS=Homo sapiens GN=DHX30;>sp Q7L2E3 DHX30_HUM          | 1.32E-17  |         |
| Q7L2E3-3               | DHX30_HUMAN Isoform 3 of Putative ATP-dependent RNA helicase DHX30 OS=Homo sapiens GN=DHX30                                 |           | 156.38  |
| Q7L2H7                 | EIF3M_HUMAN Eukaryotic translation initiation factor 3 subunit M OS=Homo sapiens GN=EIF3M PE=1 SV=1                         |           | 182.29  |
| Q7L2J0                 | MEPCE_HUMAN 7SK snRNA methylphosphate capping enzyme OS=Homo sapiens GN=MEPCE PE=1 SV=1                                     |           | 25.25   |
| Q7L2R6                 | ZN765_HUMAN Zinc finger protein 765 OS=Homo sapiens GN=ZNF765 PE=2 SV=2                                                     | 6.24E-19  |         |
| Q7L4I2;Q7L4I2-2;E1B6W3 | RSRC2_HUMAN Arginine/serine-rich coiled-coil protein 2 OS=Homo sapiens GN=RSRC2 PE=1 SV=1;>sp Q7L4I2-2 RSRC2_HUMAN Is       | 3.80E-49  |         |
| Q7L4S7                 | ARMX6_HUMAN Protein ARMX6 OS=Homo sapiens GN=ARMX6 PE=1 SV=1                                                                |           |         |

|                          |                                                                                                                        |           |        |
|--------------------------|------------------------------------------------------------------------------------------------------------------------|-----------|--------|
| Q7L513-9;Q7L513-2;Q7L591 | FCRLA_HUMAN Isoform 9 of Fc receptor-like A OS=Homo sapiens GN=FCRLA;>sp Q7L513-2 FCRLA_HUMAN Isoform 2 of Fc recepto  | 1.36E-121 |        |
| Q7L576                   | CYFP1_HUMAN Cytoplasmic FMR1-interacting protein 1 OS=Homo sapiens GN=CYFIP1 PE=1 SV=1                                 |           | 257.43 |
| Q7L576-2                 | CYFP1_HUMAN Isoform 2 of Cytoplasmic FMR1-interacting protein 1 OS=Homo sapiens GN=CYFIP1                              |           | 97.79  |
| Q7L576-3                 | CYFP1_HUMAN Isoform 3 of Cytoplasmic FMR1-interacting protein 1 OS=Homo sapiens GN=CYFIP1                              |           | 73.61  |
| Q7L576;Q7L576-2          | CYFP1_HUMAN Cytoplasmic FMR1-interacting protein 1 OS=Homo sapiens GN=CYFIP1 PE=1 SV=1;>sp Q7L576-2 CYFP1_HUMAN Isof   | 9.07E-98  |        |
| Q7L591;Q7L591-3;Q7L591   | DOK3_HUMAN Docking protein 3 OS=Homo sapiens GN=DOK3 PE=1 SV=2;>sp Q7L591-3 DOK3_HUMAN Isoform 3 of Docking protei     | 2.94E-33  |        |
| Q7L5D6                   | GET4_HUMAN Golgi to ER traffic protein 4 homolog OS=Homo sapiens GN=GET4 PE=1 SV=1                                     |           |        |
| Q7L5D6-2                 | GET4_HUMAN Isoform 2 of Golgi to ER traffic protein 4 homolog OS=Homo sapiens GN=GET4                                  |           |        |
| Q7L5D6;Q7L5D6-2          | GET4_HUMAN Golgi to ER traffic protein 4 homolog OS=Homo sapiens GN=GET4 PE=1 SV=1;>sp Q7L5D6-2 GET4_HUMAN Isoform 2   | 8.68E-82  |        |
| Q7L5L3                   | GDPD3_HUMAN Glycerophosphodiester phosphodiesterase domain-containing protein 3 OS=Homo sapiens GN=GDPD3 PE=2 SV=3     |           |        |
| Q7L5L3-1                 | GDPD3_HUMAN Isoform 2 of Glycerophosphodiester phosphodiesterase domain-containing protein 3 OS=Homo sapiens GN=GDPD3  |           |        |
| Q7L5L3;Q7L5L3-1          | GDPD3_HUMAN Glycerophosphodiester phosphodiesterase domain-containing protein 3 OS=Homo sapiens GN=GDPD3 PE=2 SV=3;>s  | 5.73E-17  |        |
| Q7L5N1                   | CSN6_HUMAN COP9 signalosome complex subunit 6 OS=Homo sapiens GN=COPS6 PE=1 SV=1                                       |           | 64.37  |
| Q7L5Y1                   | ENOF1_HUMAN Mitochondrial enolase superfamily member 1 OS=Homo sapiens GN=ENOSF1 PE=1 SV=1                             |           | 24     |
| Q7L5Y1-2                 | ENOF1_HUMAN Isoform 2 of Mitochondrial enolase superfamily member 1 OS=Homo sapiens GN=ENOSF1                          |           | 24     |
| Q7L5Y9;Q7L5Y9-2;Q7L5Y9   | MAEA_HUMAN Macrophage erythroblast attacher OS=Homo sapiens GN=MAEA PE=1 SV=1;>sp Q7L5Y9-2 MAEA_HUMAN Isoform 2 of     | 4.93E-06  |        |
| Q7L775                   | EPMIP_HUMAN EPM2A-interacting protein 1 OS=Homo sapiens GN=EPM2AIP1 PE=1 SV=1                                          |           | 30.62  |
| Q7L7L0                   | H2A3_HUMAN Histone H2A type 3 OS=Homo sapiens GN=HIST3H2A PE=1 SV=3                                                    |           | 212.14 |
| Q7L7V1                   | DHX32_HUMAN Putative pre-splicing factor ATP-dependent RNA helicase DHX32 OS=Homo sapiens GN=DHX32 PE=1 SV=1           |           | 0.66   |
| Q7L7X3;Q9H2K8            | TAOK1_HUMAN Serine/threonine-protein kinase TAO1 OS=Homo sapiens GN=TAOK1 PE=1 SV=1;>sp Q9H2K8 TAOK3_HUMAN Serine      | 2.34E-05  |        |
| Q7L804                   | RFIP2_HUMAN Rab11 family-interacting protein 2 OS=Homo sapiens GN=RAB11FIP2 PE=1 SV=1                                  |           | 53.26  |
| Q7L8L6;B4DWZ8            | FAKD5_HUMAN FAST kinase domain-containing protein 5 OS=Homo sapiens GN=FASTKD5 PE=1 SV=1;>tr B4DWZ8 B4DWZ8_HUMAN       | 4.40E-06  |        |
| Q7L9L4;Q9H8S9;Q9H8S9     | MOL1A_HUMAN Mps one binder kinase activator-like 1A OS=Homo sapiens GN=MOBK1A PE=1 SV=3;>sp Q9H8S9 MOL1B_HUMAN M       | 3.15E-16  |        |
| Q7LBC6                   | KDM3B_HUMAN Lysine-specific demethylase 3B OS=Homo sapiens GN=KDM3B PE=1 SV=2                                          |           | 104.29 |
| Q7LBC6-2                 | KDM3B_HUMAN Isoform 2 of Lysine-specific demethylase 3B OS=Homo sapiens GN=KDM3B                                       |           | 55.79  |
| Q7LBC6-3                 | KDM3B_HUMAN Isoform 3 of Lysine-specific demethylase 3B OS=Homo sapiens GN=KDM3B                                       |           | 13.36  |
| Q7LBR1                   | CHM1B_HUMAN Charged multivesicular body protein 1b OS=Homo sapiens GN=CHMP1B PE=1 SV=1                                 | 4.11E-05  |        |
| Q7LFX5                   | CHSTF_HUMAN Carbohydrate sulfotransferase 15 OS=Homo sapiens GN=CHST15 PE=1 SV=1                                       |           |        |
| Q7LG56;Q7LG56-2          | RIR2B_HUMAN Ribonucleoside-diphosphate reductase subunit M2 B OS=Homo sapiens GN=RRM2B PE=1 SV=1;>sp Q7LG56-2 RIR2B    | 2.29E-45  |        |
| Q7RTM1                   | OTOP1_HUMAN Otopetrin-1 OS=Homo sapiens GN=OTOP1 PE=2 SV=1                                                             |           |        |
| Q7RTS1                   | BHA15_HUMAN Class A basic helix-loop-helix protein 15 OS=Homo sapiens GN=BHLHA15 PE=1 SV=1                             |           |        |
| Q7RTS7                   | K2C74_HUMAN Keratin, type II cytoskeletal 74 OS=Homo sapiens GN=KRT74 PE=1 SV=2                                        |           | 310.41 |
| Q7RTT6                   | SSX6_HUMAN Putative protein SSX6 OS=Homo sapiens GN=SSX6 PE=5 SV=1                                                     |           |        |
| Q7RTV0                   | PHF5A_HUMAN PHD finger-like domain-containing protein 5A OS=Homo sapiens GN=PHF5A PE=1 SV=1                            |           | 177.25 |
| Q7RTV5                   | CI021_HUMAN UPF0308 protein C9orf21 OS=Homo sapiens GN=C9orf21 PE=2 SV=1                                               | 6.25E-05  |        |
| Q7RTX8                   | HIN1L_HUMAN Putative HIN1-like protein OS=Homo sapiens GN=HIN1L PE=5 SV=1                                              |           | 38.47  |
| Q7Z2K6                   | ERMP1_HUMAN Endoplasmic reticulum metalloproteinase 1 OS=Homo sapiens GN=ERMP1 PE=1 SV=2                               |           |        |
| Q7Z2T5                   | TRM1L_HUMAN TRMT1-like protein OS=Homo sapiens GN=TRMT1L PE=1 SV=2                                                     |           | 96.32  |
| Q7Z2T5-2                 | TRM1L_HUMAN Isoform 2 of TRMT1-like protein OS=Homo sapiens GN=TRMT1L                                                  |           | 20.23  |
| Q7Z2T5;Q7Z2T5-2          | TRM1L_HUMAN TRMT1-like protein OS=Homo sapiens GN=TRMT1L PE=1 SV=2;>sp Q7Z2T5-2 TRM1L_HUMAN Isoform 2 of TRMT1-li      | 3.72E-20  |        |
| Q7Z2W4                   | ZCCHV_HUMAN Zinc finger CCCH-type antiviral protein 1 OS=Homo sapiens GN=ZC3HAV1 PE=1 SV=3                             |           | 62.71  |
| Q7Z2W4-2                 | ZCCHV_HUMAN Isoform 2 of Zinc finger CCCH-type antiviral protein 1 OS=Homo sapiens GN=ZC3HAV1                          |           | 62.43  |
| Q7Z2W4-3                 | ZCCHV_HUMAN Isoform 3 of Zinc finger CCCH-type antiviral protein 1 OS=Homo sapiens GN=ZC3HAV1                          |           | 78.39  |
| Q7Z2W4-4                 | ZCCHV_HUMAN Isoform 4 of Zinc finger CCCH-type antiviral protein 1 OS=Homo sapiens GN=ZC3HAV1                          |           | 0.28   |
| Q7Z2W4;Q7Z2W4-2          | ZCCHV_HUMAN Zinc finger CCCH-type antiviral protein 1 OS=Homo sapiens GN=ZC3HAV1 PE=1 SV=3;>sp Q7Z2W4-2 ZCCHV_HUMA     | 6.36E-84  |        |
| Q7Z2W9                   | RM21_HUMAN 39S ribosomal protein L21, mitochondrial OS=Homo sapiens GN=MRPL21 PE=1 SV=2                                | 6.13E-19  |        |
| Q7Z2Y8                   | GVIN1_HUMAN Interferon-induced very large GTPase 1 OS=Homo sapiens GN=GVINP1 PE=2 SV=2                                 |           |        |
| Q7Z2Z2                   | ETUD1_HUMAN Elongation factor Tu GTP-binding domain-containing protein 1 OS=Homo sapiens GN=EFTUD1 PE=1 SV=2           |           |        |
| Q7Z2Z2-2                 | ETUD1_HUMAN Isoform 2 of Elongation factor Tu GTP-binding domain-containing protein 1 OS=Homo sapiens GN=EFTUD1        |           |        |
| Q7Z2Z2-3                 | ETUD1_HUMAN Isoform 3 of Elongation factor Tu GTP-binding domain-containing protein 1 OS=Homo sapiens GN=EFTUD1        |           |        |
| Q7Z2Z2;Q7Z2Z2-2          | ETUD1_HUMAN Elongation factor Tu GTP-binding domain-containing protein 1 OS=Homo sapiens GN=EFTUD1 PE=1 SV=2;>sp Q7Z2Z | 2.16E-20  |        |
| Q7Z333                   | SETX_HUMAN Probable helicase senataxin OS=Homo sapiens GN=SETX PE=1 SV=4                                               |           | 49.02  |
| Q7Z333-3                 | SETX_HUMAN Isoform 3 of Probable helicase senataxin OS=Homo sapiens GN=SETX                                            |           | 45.11  |
| Q7Z333-4                 | SETX_HUMAN Isoform 4 of Probable helicase senataxin OS=Homo sapiens GN=SETX                                            |           | 49.02  |
| Q7Z3B4                   | NUP54_HUMAN Nucleoporin p54 OS=Homo sapiens GN=NUP54 PE=1 SV=2                                                         |           |        |
| Q7Z3B4-2                 | NUP54_HUMAN Isoform 2 of Nucleoporin p54 OS=Homo sapiens GN=NUP54                                                      |           |        |
| Q7Z3B4;Q7Z3B4-2          | NUP54_HUMAN Nucleoporin p54 OS=Homo sapiens GN=NUP54 PE=1 SV=2;>sp Q7Z3B4-2 NUP54_HUMAN Isoform 2 of Nucleoporin p     | 6.22E-47  |        |
| Q7Z3E2                   | CJ118_HUMAN Uncharacterized protein C10orf118 OS=Homo sapiens GN=C10orf118 PE=2 SV=2                                   | 2.97E-08  |        |
| Q7Z3E5                   | ARMC9_HUMAN LisH domain-containing protein ARMC9 OS=Homo sapiens GN=ARMC9 PE=2 SV=2                                    |           |        |
| Q7Z3E5-2                 | ARMC9_HUMAN Isoform 2 of LisH domain-containing protein ARMC9 OS=Homo sapiens GN=ARMC9                                 |           |        |
| Q7Z3E5;A6NIB1;Q7Z3E5     | ARMC9_HUMAN LisH domain-containing protein ARMC9 OS=Homo sapiens GN=ARMC9 PE=2 SV=2;>tr A6NIB1 A6NIB1_HUMAN Unch       | 8.22E-39  |        |

|                          |                                                                                                                             |           |
|--------------------------|-----------------------------------------------------------------------------------------------------------------------------|-----------|
| Q7Z3J3                   | RGPD4_HUMAN RanBP2-like and GRIP domain-containing protein 4 OS=Homo sapiens GN=RGPD4 PE=2 SV=3                             | 182.51    |
| Q7Z3K3                   | POGZ_HUMAN Pogo transposable element with ZNF domain OS=Homo sapiens GN=POGZ PE=1 SV=2                                      |           |
| Q7Z3K3-2                 | POGZ_HUMAN Isoform 2 of Pogo transposable element with ZNF domain OS=Homo sapiens GN=POGZ                                   |           |
| Q7Z3K3-3                 | POGZ_HUMAN Isoform 3 of Pogo transposable element with ZNF domain OS=Homo sapiens GN=POGZ                                   |           |
| Q7Z3K3-4                 | POGZ_HUMAN Isoform 4 of Pogo transposable element with ZNF domain OS=Homo sapiens GN=POGZ                                   |           |
| Q7Z3K3-5                 | POGZ_HUMAN Isoform 5 of Pogo transposable element with ZNF domain OS=Homo sapiens GN=POGZ                                   |           |
| Q7Z3K3;Q7Z3K3-3;Q7Z3K3   | POGZ_HUMAN Pogo transposable element with ZNF domain OS=Homo sapiens GN=POGZ PE=1 SV=2;>sp Q7Z3K3-3 POGZ_HUMAN I            | 8.56E-26  |
| Q7Z3K6-3                 | MIER3_HUMAN Isoform 3 of Mesoderm induction early response protein 3 OS=Homo sapiens GN=MIER3                               |           |
| Q7Z3T8                   | ZFY16_HUMAN Zinc finger FYVE domain-containing protein 16 OS=Homo sapiens GN=ZFY16 PE=1 SV=3                                |           |
| Q7Z3T8-3                 | ZFY16_HUMAN Isoform 2 of Zinc finger FYVE domain-containing protein 16 OS=Homo sapiens GN=ZFY16                             |           |
| Q7Z3Y7                   | K1C28_HUMAN Keratin, type I cytoskeletal 28 OS=Homo sapiens GN=KRT28 PE=1 SV=2                                              | 253       |
| Q7Z3Y8                   | K1C27_HUMAN Keratin, type I cytoskeletal 27 OS=Homo sapiens GN=KRT27 PE=1 SV=2                                              | 196.25    |
| Q7Z3Y9                   | K1C26_HUMAN Keratin, type I cytoskeletal 26 OS=Homo sapiens GN=KRT26 PE=1 SV=2                                              | 132.43    |
| Q7Z3Z0                   | K1C25_HUMAN Keratin, type I cytoskeletal 25 OS=Homo sapiens GN=KRT25 PE=1 SV=1                                              | 207.09    |
| Q7Z401                   | MYCPP_HUMAN C-myc promoter-binding protein OS=Homo sapiens GN=DENND4A PE=1 SV=2                                             |           |
| Q7Z403                   | TMC6_HUMAN Transmembrane channel-like protein 6 OS=Homo sapiens GN=TMC6 PE=1 SV=2                                           | 22.31     |
| Q7Z403-2                 | TMC6_HUMAN Isoform 2 of Transmembrane channel-like protein 6 OS=Homo sapiens GN=TMC6                                        | 7.4       |
| Q7Z403-3                 | TMC6_HUMAN Isoform 3 of Transmembrane channel-like protein 6 OS=Homo sapiens GN=TMC6                                        | 14.91     |
| Q7Z406                   | MYH14_HUMAN Myosin-14 OS=Homo sapiens GN=MYH14 PE=1 SV=2                                                                    | 588.71    |
| Q7Z406-2                 | MYH14_HUMAN Isoform 2 of Myosin-14 OS=Homo sapiens GN=MYH14                                                                 | 588.71    |
| Q7Z406-2;Q7Z406-6;Q7Z406 | 2 MYH14_HUMAN Isoform 2 of Myosin-14 OS=Homo sapiens GN=MYH14;>sp Q7Z406-6 MYH14_HUMAN Isoform 6 of Myosin-14 OS=           | 7.44E-157 |
| Q7Z406-4                 | MYH14_HUMAN Isoform 4 of Myosin-14 OS=Homo sapiens GN=MYH14                                                                 | 426.16    |
| Q7Z406-5                 | MYH14_HUMAN Isoform 5 of Myosin-14 OS=Homo sapiens GN=MYH14                                                                 | 434.45    |
| Q7Z406-6                 | MYH14_HUMAN Isoform 6 of Myosin-14 OS=Homo sapiens GN=MYH14                                                                 | 588.71    |
| Q7Z417                   | NUFP2_HUMAN Nuclear fragile X mental retardation-interacting protein 2 OS=Homo sapiens GN=NUFIP2 PE=1 SV=1                  | 1.08E-14  |
| Q7Z418                   | KCNKI_HUMAN Potassium channel subfamily K member 18 OS=Homo sapiens GN=KCNK18 PE=1 SV=1                                     |           |
| Q7Z434                   | MAVS_HUMAN Mitochondrial antiviral-signaling protein OS=Homo sapiens GN=MAVS PE=1 SV=2                                      | 136.91    |
| Q7Z434-2                 | MAVS_HUMAN Isoform 2 of Mitochondrial antiviral-signaling protein OS=Homo sapiens GN=MAVS                                   | 14.35     |
| Q7Z434;A8K6X0            | MAVS_HUMAN Mitochondrial antiviral-signaling protein OS=Homo sapiens GN=MAVS PE=1 SV=2;>tr A8K6X0 A8K6X0_HUMAN cDNA I       | 5.33E-84  |
| Q7Z460                   | CLAP1_HUMAN CLIP-associating protein 1 OS=Homo sapiens GN=CLASP1 PE=1 SV=1                                                  | 174.16    |
| Q7Z460-2                 | CLAP1_HUMAN Isoform 2 of CLIP-associating protein 1 OS=Homo sapiens GN=CLASP1                                               | 162.72    |
| Q7Z460-3                 | CLAP1_HUMAN Isoform 3 of CLIP-associating protein 1 OS=Homo sapiens GN=CLASP1                                               | 162.72    |
| Q7Z460;Q7Z460-3;A2RU2    | CLAP1_HUMAN CLIP-associating protein 1 OS=Homo sapiens GN=CLASP1 PE=1 SV=1;>sp Q7Z460-3 CLAP1_HUMAN Isoform 3 of CL         | 1.19E-26  |
| Q7Z478                   | DHX29_HUMAN ATP-dependent RNA helicase DHX29 OS=Homo sapiens GN=DHX29 PE=1 SV=2                                             | 590.99    |
| Q7Z4G1-2;Q7Z4G1          | 2 COMD6_HUMAN Isoform 2 of COMM domain-containing protein 6 OS=Homo sapiens GN=COMMD6;>sp Q7Z4G1 COMD6_HUMAN CC             | 5.22E-07  |
| Q7Z4H3;Q7Z4H3-2;Q7Z4H3   | HDCC2_HUMAN HD domain-containing protein 2 OS=Homo sapiens GN=HDCC2 PE=1 SV=1;>sp Q7Z4H3-2 HDCC2_HUMAN Isoform              | 6.74E-13  |
| Q7Z4H8                   | KDEL2_HUMAN KDEL motif-containing protein 2 OS=Homo sapiens GN=KDEL2 PE=1 SV=2                                              | 158.23    |
| Q7Z4H8-2                 | KDEL2_HUMAN Isoform 2 of KDEL motif-containing protein 2 OS=Homo sapiens GN=KDEL2                                           | 99.75     |
| Q7Z4H8-3                 | KDEL2_HUMAN Isoform 3 of KDEL motif-containing protein 2 OS=Homo sapiens GN=KDEL2                                           | 99.75     |
| Q7Z4H8;Q7Z4H8-2;B2R8V    | KDEL2_HUMAN KDEL motif-containing protein 2 OS=Homo sapiens GN=KDEL2 PE=1 SV=2;>sp Q7Z4H8-2 KDEL2_HUMAN Isoform 2           | 1.43E-34  |
| Q7Z4I7-2;Q7Z4I7;B3KNZ    | 2 LIMS2_HUMAN Isoform 2 of LIM and senescent cell antigen-like-containing domain protein 2 OS=Homo sapiens GN=LIMS2;>sp Q7Z | 1.25E-34  |
| Q7Z4Q2                   | HEAT3_HUMAN HEAT repeat-containing protein 3 OS=Homo sapiens GN=HEATR3 PE=1 SV=2                                            |           |
| Q7Z4Q2-2                 | HEAT3_HUMAN Isoform 2 of HEAT repeat-containing protein 3 OS=Homo sapiens GN=HEATR3                                         |           |
| Q7Z4Q2-3                 | HEAT3_HUMAN Isoform 3 of HEAT repeat-containing protein 3 OS=Homo sapiens GN=HEATR3                                         |           |
| Q7Z4Q2;Q7Z4Q2-2          | HEAT3_HUMAN HEAT repeat-containing protein 3 OS=Homo sapiens GN=HEATR3 PE=1 SV=2;>sp Q7Z4Q2-2 HEAT3_HUMAN Isoform           | 1.72E-06  |
| Q7Z4R8                   | CF120_HUMAN UPF0669 protein C6orf120 OS=Homo sapiens GN=C6orf120 PE=1 SV=1                                                  | 31.3      |
| Q7Z4S6                   | KIF21A_HUMAN Kinesin-like protein KIF21A OS=Homo sapiens GN=KIF21A PE=1 SV=2                                                | 42.89     |
| Q7Z4S6-2                 | KIF21A_HUMAN Isoform 2 of Kinesin-like protein KIF21A OS=Homo sapiens GN=KIF21A                                             | 42.89     |
| Q7Z4S6-3                 | KIF21A_HUMAN Isoform 3 of Kinesin-like protein KIF21A OS=Homo sapiens GN=KIF21A                                             | 42.89     |
| Q7Z4S6-4                 | KIF21A_HUMAN Isoform 4 of Kinesin-like protein KIF21A OS=Homo sapiens GN=KIF21A                                             | 42.89     |
| Q7Z4V5                   | HDGR2_HUMAN Hepatoma-derived growth factor-related protein 2 OS=Homo sapiens GN=HDGFRP2 PE=1 SV=1                           |           |
| Q7Z4V5-2                 | HDGR2_HUMAN Isoform 2 of Hepatoma-derived growth factor-related protein 2 OS=Homo sapiens GN=HDGFRP2                        |           |
| Q7Z4V5;Q7Z4V5-2          | HDGR2_HUMAN Hepatoma-derived growth factor-related protein 2 OS=Homo sapiens GN=HDGFRP2 PE=1 SV=1;>sp Q7Z4V5-2 HDG          | 9.64E-18  |
| Q7Z4W1                   | DCXR_HUMAN L-xylulose reductase OS=Homo sapiens GN=DCXR PE=1 SV=2                                                           | 59.29     |
| Q7Z5G4                   | GOGA7_HUMAN Golgin subfamily A member 7 OS=Homo sapiens GN=GOLGA7 PE=1 SV=2                                                 | 247.67    |
| Q7Z5K2                   | WAPL_HUMAN Wings apart-like protein homolog OS=Homo sapiens GN=WAPAL PE=1 SV=1                                              | 52.89     |
| Q7Z5K2-2                 | WAPL_HUMAN Isoform 2 of Wings apart-like protein homolog OS=Homo sapiens GN=WAPAL                                           | 52.89     |
| Q7Z5K2-3                 | WAPL_HUMAN Isoform 3 of Wings apart-like protein homolog OS=Homo sapiens GN=WAPAL                                           | 52.89     |
| Q7Z5K2-3;Q7Z5K2-2;Q7Z5K2 | 3 WAPL_HUMAN Isoform 3 of Wings apart-like protein homolog OS=Homo sapiens GN=WAPAL;>sp Q7Z5K2-2 WAPL_HUMAN Isoform         | 1.56E-16  |
| Q7Z5L7-3;Q7Z5L7-2;Q7Z5L7 | 3 PODN_HUMAN Isoform 3 of Podocan OS=Homo sapiens GN=PODN;>sp Q7Z5L7-2 PODN_HUMAN Isoform 2 of Podocan OS=Homo s            | 3.31E-24  |
| Q7Z5L9                   | I2BP2_HUMAN Interferon regulatory factor 2-binding protein 2 OS=Homo sapiens GN=IRF2BP2 PE=1 SV=2                           |           |

|                          |                                                                                                                            |          |
|--------------------------|----------------------------------------------------------------------------------------------------------------------------|----------|
| Q7Z5L9-2                 | I2BP2_HUMAN Isoform 2 of Interferon regulatory factor 2-binding protein 2 OS=Homo sapiens GN=IRF2BP2                       |          |
| Q7Z5L9-3                 | I2BP2_HUMAN Isoform 3 of Interferon regulatory factor 2-binding protein 2 OS=Homo sapiens GN=IRF2BP2                       |          |
| Q7Z5L9;Q7Z5L9-2          | I2BP2_HUMAN Interferon regulatory factor 2-binding protein 2 OS=Homo sapiens GN=IRF2BP2 PE=1 SV=2;>sp Q7Z5L9-2 I2BP2_HU    | 1.47E-29 |
| Q7Z5N4                   | SDK1_HUMAN Protein sidekick-1 OS=Homo sapiens GN=SDK1 PE=1 SV=3                                                            |          |
| Q7Z5N4-3                 | SDK1_HUMAN Isoform 3 of Protein sidekick-1 OS=Homo sapiens GN=SDK1                                                         |          |
| Q7Z5P9                   | MUC19_HUMAN Mucin-19 OS=Homo sapiens GN=MUC19 PE=1 SV=2                                                                    |          |
| Q7Z5P9-2                 | MUC19_HUMAN Isoform 2 of Mucin-19 OS=Homo sapiens GN=MUC19                                                                 |          |
| Q7Z5R6                   | AB1IP_HUMAN Amyloid beta A4 precursor protein-binding family B member 1-interacting protein OS=Homo sapiens GN=APBB1IP PE= | 1.43E-22 |
| Q7Z695                   | ADCK2_HUMAN Uncharacterized aarF domain-containing protein kinase 2 OS=Homo sapiens GN=ADCK2 PE=2 SV=1                     |          |
| Q7Z6J4-2                 | 2 FGD2_HUMAN Isoform 2 of FYVE, RhoGEF and PH domain-containing protein 2 OS=Homo sapiens GN=FGD2                          | 8.57E-05 |
| Q7Z6J6                   | FRMD5_HUMAN FERM domain-containing protein 5 OS=Homo sapiens GN=FRMD5 PE=2 SV=1                                            |          |
| Q7Z6J6-2                 | FRMD5_HUMAN Isoform 2 of FERM domain-containing protein 5 OS=Homo sapiens GN=FRMD5                                         |          |
| Q7Z6K1                   | THAP5_HUMAN THAP domain-containing protein 5 OS=Homo sapiens GN=THAP5 PE=1 SV=2                                            |          |
| Q7Z6M2                   | FBX33_HUMAN F-box only protein 33 OS=Homo sapiens GN=FBXO33 PE=2 SV=1                                                      |          |
| Q7Z6M4                   | MTER2_HUMAN mTERF domain-containing protein 2 OS=Homo sapiens GN=MTERFD2 PE=1 SV=3                                         |          |
| Q7Z6R9                   | AP2D_HUMAN Transcription factor AP-2-delta OS=Homo sapiens GN=TFAP2D PE=2 SV=1                                             |          |
| Q7Z6Z7                   | HUWE1_HUMAN E3 ubiquitin-protein ligase HUWE1 OS=Homo sapiens GN=HUWE1 PE=1 SV=3                                           | 1015.88  |
| Q7Z6Z7-2                 | HUWE1_HUMAN Isoform 2 of E3 ubiquitin-protein ligase HUWE1 OS=Homo sapiens GN=HUWE1                                        | 1015.88  |
| Q7Z6Z7-3                 | HUWE1_HUMAN Isoform 3 of E3 ubiquitin-protein ligase HUWE1 OS=Homo sapiens GN=HUWE1                                        | 1015.88  |
| Q7Z6Z7;Q7Z6Z7-3;Q7Z6Z7-2 | HUWE1_HUMAN E3 ubiquitin-protein ligase HUWE1 OS=Homo sapiens GN=HUWE1 PE=1 SV=3;>sp Q7Z6Z7-3 HUWE1_HUMAN Isofor           | 1.28E-83 |
| Q7Z739                   | YTHD3_HUMAN YTH domain family protein 3 OS=Homo sapiens GN=YTHDF3 PE=1 SV=1                                                | 171.7    |
| Q7Z794                   | K2C1B_HUMAN Keratin, type II cytoskeletal 1b OS=Homo sapiens GN=KRT77 PE=1 SV=3                                            | 271.81   |
| Q7Z7A4;Q7Z7A4-4;Q7Z7A4-3 | PXK_HUMAN PX domain-containing protein kinase-like protein OS=Homo sapiens GN=PXK PE=1 SV=1;>sp Q7Z7A4-4 PXK_HUMAN Is      | 2.40E-25 |
| Q7Z7B0                   | FLIP1_HUMAN Filamin-A-interacting protein 1 OS=Homo sapiens GN=FLIP1 PE=1 SV=1                                             | 39.89    |
| Q7Z7B0-2                 | FLIP1_HUMAN Isoform 2 of Filamin-A-interacting protein 1 OS=Homo sapiens GN=FLIP1                                          | 38.56    |
| Q7Z7B0-3                 | FLIP1_HUMAN Isoform 3 of Filamin-A-interacting protein 1 OS=Homo sapiens GN=FLIP1                                          | 38.51    |
| Q7Z7D3                   | VTCN1_HUMAN V-set domain-containing T-cell activation inhibitor 1 OS=Homo sapiens GN=VTCN1 PE=1 SV=1                       |          |
| Q7Z7D3-2                 | VTCN1_HUMAN Isoform 2 of V-set domain-containing T-cell activation inhibitor 1 OS=Homo sapiens GN=VTCN1                    |          |
| Q7Z7E8;Q7Z7E8-2          | UB2Q1_HUMAN Ubiquitin-conjugating enzyme E2 Q1 OS=Homo sapiens GN=UBE2Q1 PE=1 SV=1;>sp Q7Z7E8-2 UB2Q1_HUMAN Isof           | 3.65E-12 |
| Q7Z7G0-4                 | TARSH_HUMAN Isoform 4 of Target of Nesh-SH3 OS=Homo sapiens GN=ABI3BP                                                      |          |
| Q7Z7G0;Q7Z7G0-4;Q7Z7G0-3 | TARSH_HUMAN Target of Nesh-SH3 OS=Homo sapiens GN=ABI3BP PE=1 SV=1;>sp Q7Z7G0-4 TARSH_HUMAN Isoform 4 of Target of         | 1.56E-12 |
| Q7Z7G8                   | VP13B_HUMAN Vacuolar protein sorting-associated protein 13B OS=Homo sapiens GN=VPS13B PE=1 SV=2                            |          |
| Q7Z7G8-2                 | VP13B_HUMAN Isoform 2 of Vacuolar protein sorting-associated protein 13B OS=Homo sapiens GN=VPS13B                         |          |
| Q7Z7G8-3                 | VP13B_HUMAN Isoform 3 of Vacuolar protein sorting-associated protein 13B OS=Homo sapiens GN=VPS13B                         |          |
| Q7Z7G8-4                 | VP13B_HUMAN Isoform 4 of Vacuolar protein sorting-associated protein 13B OS=Homo sapiens GN=VPS13B                         |          |
| Q7Z7G8-6                 | VP13B_HUMAN Isoform 6 of Vacuolar protein sorting-associated protein 13B OS=Homo sapiens GN=VPS13B                         |          |
| Q7Z7H5                   | TMED4_HUMAN Transmembrane emp24 domain-containing protein 4 OS=Homo sapiens GN=TMED4 PE=1 SV=1                             | 351.19   |
| Q7Z7H5-2                 | TMED4_HUMAN Isoform 2 of Transmembrane emp24 domain-containing protein 4 OS=Homo sapiens GN=TMED4                          | 351.19   |
| Q7Z7H5-3                 | TMED4_HUMAN Isoform 3 of Transmembrane emp24 domain-containing protein 4 OS=Homo sapiens GN=TMED4                          | 351.19   |
| Q7Z7H5;C9JUN6;Q7Z7H5-2   | TMED4_HUMAN Transmembrane emp24 domain-containing protein 4 OS=Homo sapiens GN=TMED4 PE=1 SV=1;>tr C9JUN6 C9JUN6_          | 6.46E-19 |
| Q7Z7H8                   | RM10_HUMAN 39S ribosomal protein L10, mitochondrial OS=Homo sapiens GN=MRPL10 PE=1 SV=3                                    |          |
| Q7Z7K0                   | COXAM_HUMAN COX assembly mitochondrial protein homolog OS=Homo sapiens GN=CMC1 PE=1 SV=1                                   | 43.72    |
| Q7Z7K6                   | CENPV_HUMAN Centromere protein V OS=Homo sapiens GN=CENPV PE=1 SV=1                                                        |          |
| Q7Z7K6-2                 | CENPV_HUMAN Isoform 2 of Centromere protein V OS=Homo sapiens GN=CENPV                                                     |          |
| Q7Z7K6-3                 | CENPV_HUMAN Isoform 3 of Centromere protein V OS=Homo sapiens GN=CENPV                                                     |          |
| Q7Z7L1                   | SLN11_HUMAN Schlafen family member 11 OS=Homo sapiens GN=SLFN11 PE=1 SV=2                                                  | 42.45    |
| Q86SE5                   | RALYL_HUMAN RNA-binding Raly-like protein OS=Homo sapiens GN=RALYL PE=1 SV=2                                               | 72.7     |
| Q86SE5-2                 | RALYL_HUMAN Isoform 2 of RNA-binding Raly-like protein OS=Homo sapiens GN=RALYL                                            | 2.32     |
| Q86SF2                   | GALT7_HUMAN N-acetylgalactosaminyltransferase 7 OS=Homo sapiens GN=GALNT7 PE=1 SV=1                                        | 21.59    |
| Q86SQ0                   | PHLB2_HUMAN Pleckstrin homology-like domain family B member 2 OS=Homo sapiens GN=PHLDB2 PE=1 SV=2                          | 92.39    |
| Q86SQ0-2                 | PHLB2_HUMAN Isoform 2 of Pleckstrin homology-like domain family B member 2 OS=Homo sapiens GN=PHLDB2                       | 92.39    |
| Q86SQ0-3                 | PHLB2_HUMAN Isoform 3 of Pleckstrin homology-like domain family B member 2 OS=Homo sapiens GN=PHLDB2                       | 92.39    |
| Q86SQ0;Q86SQ0-3;Q86SQ0-2 | PHLB2_HUMAN Pleckstrin homology-like domain family B member 2 OS=Homo sapiens GN=PHLDB2 PE=1 SV=2;>sp Q86SQ0-3 PHLB        | 8.95E-08 |
| Q86SS6                   | SYT9_HUMAN Synaptotagmin-9 OS=Homo sapiens GN=SYT9 PE=2 SV=1                                                               |          |
| Q86SX6                   | GLRX5_HUMAN Glutaredoxin-related protein 5, mitochondrial OS=Homo sapiens GN=GLRX5 PE=1 SV=2                               | 130.73   |
| Q86SZ2                   | TPC6B_HUMAN Trafficking protein particle complex subunit 6B OS=Homo sapiens GN=TRAPPC6B PE=1 SV=1                          | 51.37    |
| Q86SZ2-2                 | TPC6B_HUMAN Isoform 2 of Trafficking protein particle complex subunit 6B OS=Homo sapiens GN=TRAPPC6B                       | 51.37    |
| Q86SZ2;B4DFZ8;Q86SZ2-2   | TPC6B_HUMAN Trafficking protein particle complex subunit 6B OS=Homo sapiens GN=TRAPPC6B PE=1 SV=1;>tr B4DFZ8 B4DFZ8_HU     | 1.07E-26 |
| Q86T23                   | CROL1_HUMAN Putative ciliary rootlet coiled-coil protein-like 1 protein OS=Homo sapiens GN=CROCCP2 PE=5 SV=1               | 1.66     |
| Q86T90                   | K1328_HUMAN Uncharacterized protein KIAA1328 OS=Homo sapiens GN=KIAA1328 PE=1 SV=2                                         |          |
| Q86T90-2                 | K1328_HUMAN Isoform 2 of Uncharacterized protein KIAA1328 OS=Homo sapiens GN=KIAA1328                                      |          |

|                                        |                                                                                                                            |          |
|----------------------------------------|----------------------------------------------------------------------------------------------------------------------------|----------|
| Q86T90-3                               | K1328_HUMAN Isoform 3 of Uncharacterized protein KIAA1328 OS=Homo sapiens GN=KIAA1328                                      |          |
| Q86T90-4                               | K1328_HUMAN Isoform 4 of Uncharacterized protein KIAA1328 OS=Homo sapiens GN=KIAA1328                                      |          |
| Q86TB9                                 | PATL1_HUMAN Protein PAT1 homolog 1 OS=Homo sapiens GN=PATL1 PE=1 SV=2                                                      | 95.24    |
| Q86TB9-2                               | PATL1_HUMAN Isoform 2 of Protein PAT1 homolog 1 OS=Homo sapiens GN=PATL1                                                   | 95.24    |
| Q86TB9-4                               | PATL1_HUMAN Isoform 4 of Protein PAT1 homolog 1 OS=Homo sapiens GN=PATL1                                                   | 95.24    |
| Q86TB9;B3KXT9;Q86TB9-2                 | PATL1_HUMAN Protein PAT1 homolog 1 OS=Homo sapiens GN=PATL1 PE=1 SV=2;>tr B3KXT9 B3KXT9_HUMAN cDNA FLJ46053 fis, cl        | 4.97E-25 |
| Q86TC9;Q86TC9-2                        | MYPN_HUMAN Myopalladin OS=Homo sapiens GN=MYPN PE=1 SV=2;>sp Q86TC9-2 MYPN_HUMAN Isoform 2 of Myopalladin OS=Hon           | 7.42E-15 |
| Q86TG7;B4DSP0;Q86TG7-2                 | PEG10_HUMAN Retrotransposon-derived protein PEG10 OS=Homo sapiens GN=PEG10 PE=1 SV=2;>tr B4DSP0 B4DSP0_HUMAN HCG           | 4.14E-42 |
| Q86TI0                                 | TBCD1_HUMAN TBC1 domain family member 1 OS=Homo sapiens GN=TBC1D1 PE=1 SV=2                                                | 1.01E-18 |
| Q86TI2-2;Q1ZZB8;Q86TI2                 | DPP9_HUMAN Isoform 2 of Dipeptidyl peptidase 9 OS=Homo sapiens GN=DPP9;>tr Q1ZZB8 Q1ZZB8_HUMAN Dipeptidyl peptidase        | 4.92E-10 |
| Q86TM6                                 | SYVN1_HUMAN E3 ubiquitin-protein ligase synoviolin OS=Homo sapiens GN=SYVN1 PE=1 SV=2                                      |          |
| Q86TM6-2                               | SYVN1_HUMAN Isoform 2 of E3 ubiquitin-protein ligase synoviolin OS=Homo sapiens GN=SYVN1                                   |          |
| Q86TM6-3                               | SYVN1_HUMAN Isoform 3 of E3 ubiquitin-protein ligase synoviolin OS=Homo sapiens GN=SYVN1                                   |          |
| Q86TU7                                 | SETD3_HUMAN Histone-lysine N-methyltransferase setd3 OS=Homo sapiens GN=SETD3 PE=1 SV=1                                    | 56.27    |
| Q86TU7-2                               | SETD3_HUMAN Isoform 2 of Histone-lysine N-methyltransferase setd3 OS=Homo sapiens GN=SETD3                                 | 43.79    |
| Q86TU7-3                               | SETD3_HUMAN Isoform 3 of Histone-lysine N-methyltransferase setd3 OS=Homo sapiens GN=SETD3                                 | 43.79    |
| Q86TU7;A5PLP0;A0PJU3;Q86TU7-2;Q86TU7-3 | SETD3_HUMAN SET domain-containing protein 3 OS=Homo sapiens GN=SETD3 PE=1 SV=1;>tr A5PLP0 A5PLP0_HUMAN SET domain          | 8.56E-75 |
| Q86TU7;Q86TU7-2;Q86TU7-3               | SETD3_HUMAN Histone-lysine N-methyltransferase setd3 OS=Homo sapiens GN=SETD3 PE=1 SV=1;>sp Q86TU7-2 SETD3_HUMAN I         | 7.51E-18 |
| Q86U06                                 | RBM23_HUMAN Probable RNA-binding protein 23 OS=Homo sapiens GN=RBM23 PE=1 SV=1                                             | 12.59    |
| Q86U06-2                               | RBM23_HUMAN Isoform 2 of Probable RNA-binding protein 23 OS=Homo sapiens GN=RBM23                                          | 12.59    |
| Q86U06-3                               | RBM23_HUMAN Isoform 3 of Probable RNA-binding protein 23 OS=Homo sapiens GN=RBM23                                          | 12.59    |
| Q86U06-4                               | RBM23_HUMAN Isoform 4 of Probable RNA-binding protein 23 OS=Homo sapiens GN=RBM23                                          | 12.59    |
| Q86U06-5                               | RBM23_HUMAN Isoform 5 of Probable RNA-binding protein 23 OS=Homo sapiens GN=RBM23                                          | 12.59    |
| Q86U28                                 | ISCA2_HUMAN Iron-sulfur cluster assembly 2 homolog, mitochondrial OS=Homo sapiens GN=ISCA2 PE=1 SV=2                       | 22.63    |
| Q86U38                                 | CN021_HUMAN Pumilio domain-containing protein C14orf21 OS=Homo sapiens GN=C14orf21 PE=1 SV=1                               |          |
| Q86U42                                 | PABP2_HUMAN Polyadenylate-binding protein 2 OS=Homo sapiens GN=PABPN1 PE=1 SV=3                                            | 46.52    |
| Q86U42-2                               | PABP2_HUMAN Isoform 2 of Polyadenylate-binding protein 2 OS=Homo sapiens GN=PABPN1                                         | 46.52    |
| Q86U42;Q86U42-2                        | PABP2_HUMAN Polyadenylate-binding protein 2 OS=Homo sapiens GN=PABPN1 PE=1 SV=3;>sp Q86U42-2 PABP2_HUMAN Isoform 2         | 1.88E-20 |
| Q86U86                                 | PB1_HUMAN Protein polybromo-1 OS=Homo sapiens GN=PBRM1 PE=1 SV=1                                                           |          |
| Q86U86-2                               | PB1_HUMAN Isoform 2 of Protein polybromo-1 OS=Homo sapiens GN=PBRM1                                                        |          |
| Q86U86-3                               | PB1_HUMAN Isoform 3 of Protein polybromo-1 OS=Homo sapiens GN=PBRM1                                                        |          |
| Q86U86-4                               | PB1_HUMAN Isoform 4 of Protein polybromo-1 OS=Homo sapiens GN=PBRM1                                                        |          |
| Q86U86-5                               | PB1_HUMAN Isoform 5 of Protein polybromo-1 OS=Homo sapiens GN=PBRM1                                                        |          |
| Q86U86-6                               | PB1_HUMAN Isoform 6 of Protein polybromo-1 OS=Homo sapiens GN=PBRM1                                                        |          |
| Q86U86-7                               | PB1_HUMAN Isoform 7 of Protein polybromo-1 OS=Homo sapiens GN=PBRM1                                                        |          |
| Q86U86-8                               | PB1_HUMAN Isoform 8 of Protein polybromo-1 OS=Homo sapiens GN=PBRM1                                                        |          |
| Q86U86-9                               | PB1_HUMAN Isoform 9 of Protein polybromo-1 OS=Homo sapiens GN=PBRM1                                                        |          |
| Q86U86;Q86U86-8;Q86U86-9               | PB1_HUMAN Protein polybromo-1 OS=Homo sapiens GN=PBRM1 PE=1 SV=1;>sp Q86U86-8 PB1_HUMAN Isoform 8 of Protein polybri       | 6.42E-13 |
| Q86U90                                 | YRDC_HUMAN YrdC domain-containing protein, mitochondrial OS=Homo sapiens GN=YRDC PE=1 SV=1                                 |          |
| Q86UC2                                 | RSPH3_HUMAN Radial spoke head protein 3 homolog OS=Homo sapiens GN=RSPH3 PE=2 SV=1                                         |          |
| Q86UC2-2                               | RSPH3_HUMAN Isoform 2 of Radial spoke head protein 3 homolog OS=Homo sapiens GN=RSPH3                                      |          |
| Q86UE3                                 | ZNF546_HUMAN Zinc finger protein 546 OS=Homo sapiens GN=ZNF546 PE=2 SV=2                                                   |          |
| Q86UE4                                 | LYRIC_HUMAN Protein LYRIC OS=Homo sapiens GN=MTDH PE=1 SV=2                                                                | 367.28   |
| Q86UE8                                 | TLK2_HUMAN Serine/threonine-protein kinase tousled-like 2 OS=Homo sapiens GN=TLK2 PE=1 SV=2                                | 44.82    |
| Q86UE8-2                               | TLK2_HUMAN Isoform 2 of Serine/threonine-protein kinase tousled-like 2 OS=Homo sapiens GN=TLK2                             | 44.82    |
| Q86UE8-3                               | TLK2_HUMAN Isoform 3 of Serine/threonine-protein kinase tousled-like 2 OS=Homo sapiens GN=TLK2                             | 44.82    |
| Q86UE8;Q86UE8-2;Q86UE8-3               | TLK2_HUMAN Serine/threonine-protein kinase tousled-like 2 OS=Homo sapiens GN=TLK2 PE=1 SV=2;>sp Q86UE8-2 TLK2_HUMAN I      | 8.08E-13 |
| Q86UF1                                 | TSN33_HUMAN Tetraspanin-33 OS=Homo sapiens GN=TSPAN33 PE=2 SV=1                                                            |          |
| Q86UK7                                 | ZNF598_HUMAN Zinc finger protein 598 OS=Homo sapiens GN=ZNF598 PE=1 SV=1                                                   | 48.54    |
| Q86UK7-2                               | ZNF598_HUMAN Isoform 2 of Zinc finger protein 598 OS=Homo sapiens GN=ZNF598                                                | 48.54    |
| Q86UK7-3                               | ZNF598_HUMAN Isoform 3 of Zinc finger protein 598 OS=Homo sapiens GN=ZNF598                                                | 48.54    |
| Q86UP2                                 | KTN1_HUMAN Kinectin OS=Homo sapiens GN=KTN1 PE=1 SV=1                                                                      | 1575.99  |
| Q86UP2-2                               | KTN1_HUMAN Isoform 2 of Kinectin OS=Homo sapiens GN=KTN1                                                                   | 1526.57  |
| Q86UP2;B4DZ88;Q86UP2-2                 | KTN1_HUMAN Kinectin OS=Homo sapiens GN=KTN1 PE=1 SV=1;>tr B4DZ88 B4DZ88_HUMAN KTN1 protein OS=Homo sapiens GN=K            | 0        |
| Q86UP8-2                               | GTD2A_HUMAN Isoform 2 of General transcription factor II-I repeat domain-containing protein 2A OS=Homo sapiens GN=GTF2IRD2 |          |
| Q86UP8-3                               | GTD2A_HUMAN Isoform 3 of General transcription factor II-I repeat domain-containing protein 2A OS=Homo sapiens GN=GTF2IRD2 |          |
| Q86UP8-4                               | GTD2A_HUMAN Isoform 4 of General transcription factor II-I repeat domain-containing protein 2A OS=Homo sapiens GN=GTF2IRD2 |          |
| Q86UP8-5                               | GTD2A_HUMAN Isoform 5 of General transcription factor II-I repeat domain-containing protein 2A OS=Homo sapiens GN=GTF2IRD2 |          |
| Q86UQ0                                 | ZNF589_HUMAN Zinc finger protein 589 OS=Homo sapiens GN=ZNF589 PE=1 SV=1                                                   |          |
| Q86UQ0-2                               | ZNF589_HUMAN Isoform 2 of Zinc finger protein 589 OS=Homo sapiens GN=ZNF589                                                |          |
| Q86UQ0-3                               | ZNF589_HUMAN Isoform 3 of Zinc finger protein 589 OS=Homo sapiens GN=ZNF589                                                |          |



|                       |                                                                                                                         |           |        |
|-----------------------|-------------------------------------------------------------------------------------------------------------------------|-----------|--------|
| Q86UQ4                | ABCAD_HUMAN ATP-binding cassette sub-family A member 13 OS=Homo sapiens GN=ABCA13 PE=2 SV=3                             |           | 110.3  |
| Q86UQ4-2              | ABCAD_HUMAN Isoform 2 of ATP-binding cassette sub-family A member 13 OS=Homo sapiens GN=ABCA13                          |           |        |
| Q86UQ4-3              | ABCAD_HUMAN Isoform 3 of ATP-binding cassette sub-family A member 13 OS=Homo sapiens GN=ABCA13                          |           | 12.5   |
| Q86UQ4;Q86UQ4-3       | ABCAD_HUMAN ATP-binding cassette sub-family A member 13 OS=Homo sapiens GN=ABCA13 PE=2 SV=3;>sp Q86UQ4-3 ABCAD_HI       | 8.93E-23  |        |
| Q86UQ8                | NFE4_HUMAN Transcription factor NF-E4 OS=Homo sapiens GN=NFE4 PE=1 SV=1                                                 |           |        |
| Q86UQ8-2              | NFE4_HUMAN Isoform 2 of Transcription factor NF-E4 OS=Homo sapiens GN=NFE4                                              |           |        |
| Q86UR5                | RIMS1_HUMAN Regulating synaptic membrane exocytosis protein 1 OS=Homo sapiens GN=RIMS1 PE=1 SV=1                        |           |        |
| Q86UT8                | CCDC84_HUMAN Coiled-coil domain-containing protein 84 OS=Homo sapiens GN=CCDC84 PE=2 SV=1                               |           |        |
| Q86UV5                | UBP48_HUMAN Ubiquitin carboxyl-terminal hydrolase 48 OS=Homo sapiens GN=USP48 PE=1 SV=1                                 |           | 68.5   |
| Q86UV5-2              | UBP48_HUMAN Isoform 2 of Ubiquitin carboxyl-terminal hydrolase 48 OS=Homo sapiens GN=USP48                              |           | 68.5   |
| Q86UV5-3              | UBP48_HUMAN Isoform 3 of Ubiquitin carboxyl-terminal hydrolase 48 OS=Homo sapiens GN=USP48                              |           | 68.5   |
| Q86UV5;Q86UV5-2;Q86U  | UBP48_HUMAN Ubiquitin carboxyl-terminal hydrolase 48 OS=Homo sapiens GN=USP48 PE=1 SV=1;>sp Q86UV5-2 UBP48_HUMAN Is     | 2.99E-21  |        |
| Q86UX7;Q86UX7-2       | URP2_HUMAN Fermitin family homolog 3 OS=Homo sapiens GN=FERMT3 PE=1 SV=1;>sp Q86UX7-2 URP2_HUMAN Isoform 2 of Ferr      | 1.99E-97  |        |
| Q86UY8;Q86UY8-2       | NT5D3_HUMAN 5-nucleotidase domain-containing protein 3 OS=Homo sapiens GN=NT5DC3 PE=2 SV=1;>sp Q86UY8-2 NT5D3_HUM/      | 1.62E-19  |        |
| Q86V15                | CASZ1_HUMAN Zinc finger protein castor homolog 1 OS=Homo sapiens GN=CASZ1 PE=2 SV=4                                     |           | 28.06  |
| Q86V15-2              | CASZ1_HUMAN Isoform 2 of Zinc finger protein castor homolog 1 OS=Homo sapiens GN=CASZ1                                  |           | 28.06  |
| Q86V20                | FAM35A_HUMAN Protein FAM35A OS=Homo sapiens GN=FAM35A PE=1 SV=1                                                         |           |        |
| Q86V20-2              | FAM35A_HUMAN Isoform 2 of Protein FAM35A OS=Homo sapiens GN=FAM35A                                                      |           |        |
| Q86V21;Q86V21-2;Q86V2 | AACS_HUMAN Acetoacetyl-CoA synthetase OS=Homo sapiens GN=AACS PE=1 SV=1;>sp Q86V21-2 AACS_HUMAN Isoform 2 of Acetc      | 7.14E-17  |        |
| Q86V48                | LUZP1_HUMAN Leucine zipper protein 1 OS=Homo sapiens GN=LUZP1 PE=1 SV=2                                                 |           | 575.02 |
| Q86V48-2              | LUZP1_HUMAN Isoform 2 of Leucine zipper protein 1 OS=Homo sapiens GN=LUZP1                                              |           | 534.59 |
| Q86V48-3              | LUZP1_HUMAN Isoform 3 of Leucine zipper protein 1 OS=Homo sapiens GN=LUZP1                                              |           | 534.59 |
| Q86V48;Q86V48-3;Q86V4 | LUZP1_HUMAN Leucine zipper protein 1 OS=Homo sapiens GN=LUZP1 PE=1 SV=2;>sp Q86V48-3 LUZP1_HUMAN Isoform 3 of Leucin    | 8.93E-23  |        |
| Q86V81                | THOC4_HUMAN THO complex subunit 4 OS=Homo sapiens GN=THOC4 PE=1 SV=3                                                    |           | 290.48 |
| Q86V88;Q86V88-2;Q86V8 | MGDP1_HUMAN Magnesium-dependent phosphatase 1 OS=Homo sapiens GN=MDP1 PE=1 SV=1;>sp Q86V88-2 MGDP1_HUMAN Isofr          | 7.09E-10  |        |
| Q86VB7-2;Q86VB7;Q86VE | 2 C163A_HUMAN Isoform 2 of Scavenger receptor cysteine-rich type 1 protein M130 OS=Homo sapiens GN=CD163;>sp Q86VB7 C16 | 7.47E-154 |        |
| Q86VD1                | MORC1_HUMAN MORC family CW-type zinc finger protein 1 OS=Homo sapiens GN=MORC1 PE=2 SV=2                                |           |        |
| Q86VI3                | IQGA3_HUMAN Ras GTPase-activating-like protein IQGAP3 OS=Homo sapiens GN=IQGAP3 PE=1 SV=2                               |           | 281.47 |
| Q86VM9                | ZCH18_HUMAN Zinc finger CCCH domain-containing protein 18 OS=Homo sapiens GN=ZC3H18 PE=1 SV=2                           |           |        |
| Q86VM9-2              | ZCH18_HUMAN Isoform 2 of Zinc finger CCCH domain-containing protein 18 OS=Homo sapiens GN=ZC3H18                        |           |        |
| Q86VM9;Q86VM9-2       | ZCH18_HUMAN Zinc finger CCCH domain-containing protein 18 OS=Homo sapiens GN=ZC3H18 PE=1 SV=2;>sp Q86VM9-2 ZCH18_H      | 1.67E-23  |        |
| Q86VP6                | CAND1_HUMAN Cullin-associated NEDD8-dissociated protein 1 OS=Homo sapiens GN=CAND1 PE=1 SV=2                            |           | 474.18 |
| Q86VP6-2              | CAND1_HUMAN Isoform 2 of Cullin-associated NEDD8-dissociated protein 1 OS=Homo sapiens GN=CAND1                         |           | 435.96 |
| Q86VP6-3              | CAND1_HUMAN Isoform 3 of Cullin-associated NEDD8-dissociated protein 1 OS=Homo sapiens GN=CAND1                         |           | 83.41  |
| Q86VP6;Q86VP6-2       | CAND1_HUMAN Cullin-associated NEDD8-dissociated protein 1 OS=Homo sapiens GN=CAND1 PE=1 SV=2;>sp Q86VP6-2 CAND1_HUI     | 0         |        |
| Q86VR2                | F134C_HUMAN Protein FAM134C OS=Homo sapiens GN=FAM134C PE=1 SV=1                                                        |           |        |
| Q86VS8                | HOK3_HUMAN Protein Hook homolog 3 OS=Homo sapiens GN=HOK3 PE=1 SV=2                                                     | 8.28E-14  |        |
| Q86VV8                | RTTN_HUMAN Rotatin OS=Homo sapiens GN=RTTN PE=1 SV=3                                                                    |           | 41.81  |
| Q86VV8-2              | RTTN_HUMAN Isoform 2 of Rotatin OS=Homo sapiens GN=RTTN                                                                 |           | 20.72  |
| Q86VV8-3              | RTTN_HUMAN Isoform 3 of Rotatin OS=Homo sapiens GN=RTTN                                                                 |           | 41.81  |
| Q86VV8-4              | RTTN_HUMAN Isoform 4 of Rotatin OS=Homo sapiens GN=RTTN                                                                 |           | 21.9   |
| Q86VV8-5              | RTTN_HUMAN Isoform 5 of Rotatin OS=Homo sapiens GN=RTTN                                                                 |           | 26.54  |
| Q86VW0                | SESD1_HUMAN SEC14 domain and spectrin repeat-containing protein 1 OS=Homo sapiens GN=SESTD1 PE=1 SV=2                   |           |        |
| Q86VX2                | COMD7_HUMAN COMM domain-containing protein 7 OS=Homo sapiens GN=COMMD7 PE=1 SV=2                                        |           | 38.38  |
| Q86VX2-2              | COMD7_HUMAN Isoform 2 of COMM domain-containing protein 7 OS=Homo sapiens GN=COMMD7                                     |           | 38.38  |
| Q86VX2;Q86VX2-2       | COMD7_HUMAN COMM domain-containing protein 7 OS=Homo sapiens GN=COMMD7 PE=1 SV=2;>sp Q86VX2-2 COMD7_HUMAN Iso           | 2.12E-05  |        |
| Q86VY4                | TSYL5_HUMAN Testis-specific Y-encoded-like protein 5 OS=Homo sapiens GN=TSPYL5 PE=1 SV=2                                |           |        |
| Q86W24                | NAL14_HUMAN NACHT, LRR and PYD domains-containing protein 14 OS=Homo sapiens GN=NLRP14 PE=2 SV=1                        |           |        |
| Q86W25                | NAL13_HUMAN NACHT, LRR and PYD domains-containing protein 13 OS=Homo sapiens GN=NLRP13 PE=1 SV=2                        |           | 26.16  |
| Q86W26                | NAL10_HUMAN NACHT, LRR and PYD domains-containing protein 10 OS=Homo sapiens GN=NLRP10 PE=1 SV=1                        |           |        |
| Q86W34                | AMZ2_HUMAN Archaemetzincin-2 OS=Homo sapiens GN=AMZ2 PE=1 SV=2                                                          |           |        |
| Q86W42                | THOC6_HUMAN THO complex subunit 6 homolog OS=Homo sapiens GN=THOC6 PE=1 SV=1                                            |           | 59.73  |
| Q86W42-2              | THOC6_HUMAN Isoform 2 of THO complex subunit 6 homolog OS=Homo sapiens GN=THOC6                                         |           | 59.73  |
| Q86W42-3              | THOC6_HUMAN Isoform 3 of THO complex subunit 6 homolog OS=Homo sapiens GN=THOC6                                         |           | 59.73  |
| Q86W42;Q86W42-2;Q86V  | THOC6_HUMAN THO complex subunit 6 homolog OS=Homo sapiens GN=THOC6 PE=1 SV=1;>sp Q86W42-2 THOC6_HUMAN Isoform           | 2.28E-08  |        |
| Q86W56;Q86W56-2;Q86V  | PARG_HUMAN Poly(ADP-ribose) glycohydrolase OS=Homo sapiens GN=PARG PE=1 SV=1;>sp Q86W56-2 PARG_HUMAN Isoform 2 of       | 1.49E-08  |        |
| Q86W92;Q86W92-2;Q86V  | LIPB1_HUMAN Liprin-beta-1 OS=Homo sapiens GN=PPFIBP1 PE=1 SV=2;>sp Q86W92-2 LIPB1_HUMAN Isoform 2 of Liprin-beta-1 O    | 8.09E-05  |        |
| Q86WA6                | BPHL_HUMAN Valacyclovir hydrolase OS=Homo sapiens GN=BPHL PE=1 SV=1                                                     |           | 76.3   |
| Q86WA6-2              | BPHL_HUMAN Isoform 2 of Valacyclovir hydrolase OS=Homo sapiens GN=BPHL                                                  |           | 76.3   |
| Q86WA6;Q86WA6-2       | BPHL_HUMAN Valacyclovir hydrolase OS=Homo sapiens GN=BPHL PE=1 SV=1;>sp Q86WA6-2 BPHL_HUMAN Isoform 2 of Valacyclovi    | 1.53E-06  |        |
| Q86WB0;Q86WB0-2;Q86V  | NIPA_HUMAN Nuclear-interacting partner of ALK OS=Homo sapiens GN=ZC3HC1 PE=1 SV=1;>sp Q86WB0-2 NIPA_HUMAN Isoform 2     | 2.49E-05  |        |

|                       |                                                                                                                        |          |        |
|-----------------------|------------------------------------------------------------------------------------------------------------------------|----------|--------|
| Q86WG5                | MTMRD_HUMAN Myotubularin-related protein 13 OS=Homo sapiens GN=SBF2 PE=1 SV=1                                          |          | 19.32  |
| Q86WG5-3              | MTMRD_HUMAN Isoform 3 of Myotubularin-related protein 13 OS=Homo sapiens GN=SBF2                                       |          | 19.32  |
| Q86WI3                | NLRC5_HUMAN Protein NLRC5 OS=Homo sapiens GN=NLRC5 PE=1 SV=3                                                           |          |        |
| Q86WI3-2              | NLRC5_HUMAN Isoform 2 of Protein NLRC5 OS=Homo sapiens GN=NLRC5                                                        |          |        |
| Q86WI3-3              | NLRC5_HUMAN Isoform 3 of Protein NLRC5 OS=Homo sapiens GN=NLRC5                                                        |          |        |
| Q86WI3-4              | NLRC5_HUMAN Isoform 4 of Protein NLRC5 OS=Homo sapiens GN=NLRC5                                                        |          |        |
| Q86WI3-5              | NLRC5_HUMAN Isoform 5 of Protein NLRC5 OS=Homo sapiens GN=NLRC5                                                        |          |        |
| Q86WI3-6              | NLRC5_HUMAN Isoform 6 of Protein NLRC5 OS=Homo sapiens GN=NLRC5                                                        |          |        |
| Q86WQ0                | NR2CA_HUMAN Nuclear receptor 2C2-associated protein OS=Homo sapiens GN=NR2C2AP PE=1 SV=1                               | 1.38E-17 |        |
| Q86WR0                | CCD25_HUMAN Coiled-coil domain-containing protein 25 OS=Homo sapiens GN=CCDC25 PE=1 SV=2                               | 6.90E-05 |        |
| Q86WR7                | CJ047_HUMAN Uncharacterized protein C10orf47 OS=Homo sapiens GN=C10orf47 PE=1 SV=2                                     | 2.47E-10 |        |
| Q86WV6                | TM173_HUMAN Transmembrane protein 173 OS=Homo sapiens GN=TMEM173 PE=1 SV=1                                             | 8.56E-07 |        |
| Q86WX3                | AROS_HUMAN Active regulator of SIRT1 OS=Homo sapiens GN=RPS19BP1 PE=1 SV=1                                             |          | 41.43  |
| Q86X29-2              | LSR_HUMAN Isoform 2 of Lipolysis-stimulated lipoprotein receptor OS=Homo sapiens GN=LSR                                |          |        |
| Q86X55;Q86X55-1;Q86X5 | CARM1_HUMAN Histone-arginine methyltransferase CARM1 OS=Homo sapiens GN=CARM1 PE=1 SV=3;>sp Q86X55-1 CARM1_HUMAN       | 1.25E-09 |        |
| Q86X67                | NUD13_HUMAN Nucleoside diphosphate-linked moiety X motif 13 OS=Homo sapiens GN=NUDT13 PE=2 SV=3                        |          | 21.17  |
| Q86X67-2              | NUD13_HUMAN Isoform 2 of Nucleoside diphosphate-linked moiety X motif 13 OS=Homo sapiens GN=NUDT13                     |          | 21.17  |
| Q86X67;Q86X67-2       | NUD13_HUMAN Nucleoside diphosphate-linked moiety X motif 13 OS=Homo sapiens GN=NUDT13 PE=2 SV=3;>sp Q86X67-2 NUD13_    | 2.32E-05 |        |
| Q86X76                | NIT1_HUMAN Nitrilase homolog 1 OS=Homo sapiens GN=NIT1 PE=1 SV=2                                                       |          | 23.72  |
| Q86X76-2              | NIT1_HUMAN Isoform 1 of Nitrilase homolog 1 OS=Homo sapiens GN=NIT1                                                    |          | 23.72  |
| Q86X76-3              | NIT1_HUMAN Isoform 4 of Nitrilase homolog 1 OS=Homo sapiens GN=NIT1                                                    |          | 23.72  |
| Q86X76-3;B2R8D1;Q86X7 | 3 NIT1_HUMAN Isoform 4 of Nitrilase homolog 1 OS=Homo sapiens GN=NIT1;>tr B2R8D1 B2R8D1_HUMAN cDNA, FLJ93841, highly s | 4.02E-16 |        |
| Q86X76-4              | NIT1_HUMAN Isoform 5 of Nitrilase homolog 1 OS=Homo sapiens GN=NIT1                                                    |          | 28.97  |
| Q86X83                | COMD2_HUMAN COMM domain-containing protein 2 OS=Homo sapiens GN=COMMD2 PE=1 SV=2                                       |          |        |
| Q86XA9;Q86XA9-2       | HTR5A_HUMAN HEAT repeat-containing protein 5A OS=Homo sapiens GN=HEATR5A PE=1 SV=2;>sp Q86XA9-2 HTR5A_HUMAN Isofo      | 3.38E-07 |        |
| Q86XD8                | ANUB1_HUMAN AN1-type zinc finger and ubiquitin domain-containing protein 1 OS=Homo sapiens GN=ANUBL1 PE=2 SV=2         |          |        |
| Q86XF0                | DYRL1_HUMAN Dihydrofolate reductase-like protein 1 OS=Homo sapiens GN=DHFRL1 PE=2 SV=1                                 |          |        |
| Q86XH1;Q86XH1-2       | IQCA1_HUMAN IQ and AAA domain-containing protein 1 OS=Homo sapiens GN=IQCA1 PE=2 SV=1;>sp Q86XH1-2 IQCA1_HUMAN Iso     | 3.33E-05 |        |
| Q86XI2                | CNDG2_HUMAN Condensin-2 complex subunit G2 OS=Homo sapiens GN=NCAPG2 PE=1 SV=1                                         |          |        |
| Q86XI2-2              | CNDG2_HUMAN Isoform 2 of Condensin-2 complex subunit G2 OS=Homo sapiens GN=NCAPG2                                      |          |        |
| Q86XI2-2;Q86XI2       | 2 CNDG2_HUMAN Isoform 2 of Condensin-2 complex subunit G2 OS=Homo sapiens GN=NCAPG2;>sp Q86XI2 CNDG2_HUMAN Conde       | 1.01E-05 |        |
| Q86XL3-2              | ANKL2_HUMAN Isoform 2 of Ankyrin repeat and LEM domain-containing protein 2 OS=Homo sapiens GN=ANKLE2                  |          |        |
| Q86XN6                | ZN761_HUMAN Zinc finger protein 761 OS=Homo sapiens GN=ZNF761 PE=2 SV=2                                                |          |        |
| Q86XN6-2              | ZN761_HUMAN Isoform 2 of Zinc finger protein 761 OS=Homo sapiens GN=ZNF761                                             |          |        |
| Q86XN6-3              | ZN761_HUMAN Isoform 3 of Zinc finger protein 761 OS=Homo sapiens GN=ZNF761                                             |          |        |
| Q86XP3                | DDX42_HUMAN ATP-dependent RNA helicase DDX42 OS=Homo sapiens GN=DDX42 PE=1 SV=1                                        |          | 214.75 |
| Q86XP3-2              | DDX42_HUMAN Isoform 2 of ATP-dependent RNA helicase DDX42 OS=Homo sapiens GN=DDX42                                     |          | 212.8  |
| Q86XP3;Q86XP3-2       | DDX42_HUMAN ATP-dependent RNA helicase DDX42 OS=Homo sapiens GN=DDX42 PE=1 SV=1;>sp Q86XP3-2 DDX42_HUMAN Isofo         | 2.93E-60 |        |
| Q86XR2                | NIBL2_HUMAN Niban-like protein 2 OS=Homo sapiens GN=FAM129C PE=1 SV=2                                                  |          | 24.49  |
| Q86XR2-2              | NIBL2_HUMAN Isoform 2 of Niban-like protein 2 OS=Homo sapiens GN=FAM129C                                               |          | 24.49  |
| Q86XR2-3              | NIBL2_HUMAN Isoform 3 of Niban-like protein 2 OS=Homo sapiens GN=FAM129C                                               |          | 24.49  |
| Q86XR2-5              | NIBL2_HUMAN Isoform 5 of Niban-like protein 2 OS=Homo sapiens GN=FAM129C                                               |          | 24.49  |
| Q86XZ4                | SPAS2_HUMAN Spermatogenesis-associated serine-rich protein 2 OS=Homo sapiens GN=SPATS2 PE=1 SV=1                       |          |        |
| Q86Y30                | BAGE2_HUMAN B melanoma antigen 2 OS=Homo sapiens GN=BAGE2 PE=2 SV=1                                                    |          |        |
| Q86Y33                | CD20B_HUMAN Cell division cycle protein 20 homolog B OS=Homo sapiens GN=CDC20B PE=2 SV=3                               |          |        |
| Q86Y33-2              | CD20B_HUMAN Isoform 2 of Cell division cycle protein 20 homolog B OS=Homo sapiens GN=CDC20B                            |          |        |
| Q86Y33-3              | CD20B_HUMAN Isoform 3 of Cell division cycle protein 20 homolog B OS=Homo sapiens GN=CDC20B                            |          |        |
| Q86Y33-4              | CD20B_HUMAN Isoform 4 of Cell division cycle protein 20 homolog B OS=Homo sapiens GN=CDC20B                            |          |        |
| Q86Y33-5              | CD20B_HUMAN Isoform 5 of Cell division cycle protein 20 homolog B OS=Homo sapiens GN=CDC20B                            |          |        |
| Q86Y39                | NDUAB_HUMAN NADH dehydrogenase [ubiquinone] 1 alpha subcomplex subunit 11 OS=Homo sapiens GN=NDUFA11 PE=1 SV=3         |          | 61.69  |
| Q86Y39-2              | NDUAB_HUMAN Isoform 2 of NADH dehydrogenase [ubiquinone] 1 alpha subcomplex subunit 11 OS=Homo sapiens GN=NDUFA11      |          | 27.99  |
| Q86Y39-2;Q86Y39       | 2 NDUAB_HUMAN Isoform 2 of NADH dehydrogenase [ubiquinone] 1 alpha subcomplex subunit 11 OS=Homo sapiens GN=NDUFA11;>  | 3.19E-05 |        |
| Q86Y39;Q86Y39-2       | NDUAB_HUMAN NADH dehydrogenase [ubiquinone] 1 alpha subcomplex subunit 11 OS=Homo sapiens GN=NDUFA11 PE=1 SV=3;>sp     | 2.43E-14 |        |
| Q86Y46                | K2C73_HUMAN Keratin, type II cytoskeletal 73 OS=Homo sapiens GN=KRT73 PE=1 SV=1                                        |          | 311.64 |
| Q86Y46-2              | K2C73_HUMAN Isoform 2 of Keratin, type II cytoskeletal 73 OS=Homo sapiens GN=KRT73                                     |          | 210.15 |
| Q86Y56;Q86Y56-2       | HEAT2_HUMAN HEAT repeat-containing protein 2 OS=Homo sapiens GN=HEATR2 PE=1 SV=4;>sp Q86Y56-2 HEAT2_HUMAN Isoform      | 4.36E-29 |        |
| Q86Y79                | PTH_HUMAN Probable peptidyl-tRNA hydrolase OS=Homo sapiens GN=PTRH1 PE=1 SV=1                                          | 4.30E-08 |        |
| Q86Y82                | STX12_HUMAN Syntaxin-12 OS=Homo sapiens GN=STX12 PE=1 SV=1                                                             |          | 294.59 |
| Q86YB8                | ERO1B_HUMAN ERO1-like protein beta OS=Homo sapiens GN=ERO1LB PE=1 SV=2                                                 |          | 56.36  |
| Q86YD7                | F90A1_HUMAN Protein FAM90A1 OS=Homo sapiens GN=FAM90A1 PE=2 SV=3                                                       |          |        |
| Q86YJ6                | THNS2_HUMAN Threonine synthase-like 2 OS=Homo sapiens GN=THNSL2 PE=2 SV=3                                              |          |        |

|                        |                                                                                                                          |           |        |
|------------------------|--------------------------------------------------------------------------------------------------------------------------|-----------|--------|
| Q86YJ6-3               | THNS2_HUMAN Isoform 3 of Threonine synthase-like 2 OS=Homo sapiens GN=THNSL2                                             |           |        |
| Q86YJ6-4               | THNS2_HUMAN Isoform 4 of Threonine synthase-like 2 OS=Homo sapiens GN=THNSL2                                             |           |        |
| Q86YN1                 | DOPP1_HUMAN Dolichyldiphosphatase 1 OS=Homo sapiens GN=DOLPP1 PE=1 SV=1                                                  |           |        |
| Q86YN6                 | PRGC2_HUMAN Peroxisome proliferator-activated receptor gamma coactivator 1-beta OS=Homo sapiens GN=PPARGC1B PE=1 SV=2    |           |        |
| Q86YN6-2               | PRGC2_HUMAN Isoform 2 of Peroxisome proliferator-activated receptor gamma coactivator 1-beta OS=Homo sapiens GN=PPARGC1B |           |        |
| Q86YN6-3               | PRGC2_HUMAN Isoform 3 of Peroxisome proliferator-activated receptor gamma coactivator 1-beta OS=Homo sapiens GN=PPARGC1B |           |        |
| Q86YN6-4               | PRGC2_HUMAN Isoform 4 of Peroxisome proliferator-activated receptor gamma coactivator 1-beta OS=Homo sapiens GN=PPARGC1B |           |        |
| Q86YN6-5               | PRGC2_HUMAN Isoform 5 of Peroxisome proliferator-activated receptor gamma coactivator 1-beta OS=Homo sapiens GN=PPARGC1B |           |        |
| Q86YP4                 | P66A_HUMAN Transcriptional repressor p66-alpha OS=Homo sapiens GN=GATAD2A PE=1 SV=1                                      |           |        |
| Q86YP4-2               | P66A_HUMAN Isoform 2 of Transcriptional repressor p66-alpha OS=Homo sapiens GN=GATAD2A                                   |           |        |
| Q86YP4;Q86YP4-2        | P66A_HUMAN Transcriptional repressor p66-alpha OS=Homo sapiens GN=GATAD2A PE=1 SV=1;>sp Q86YP4-2 P66A_HUMAN Isoform      | 2.84E-06  |        |
| Q86YQ8                 | CPNE8_HUMAN Copine-8 OS=Homo sapiens GN=CPNE8 PE=1 SV=2                                                                  |           | 26.97  |
| Q86YR5                 | GPSM1_HUMAN G-protein-signaling modulator 1 OS=Homo sapiens GN=GPSM1 PE=1 SV=2                                           |           |        |
| Q86YR5-3               | GPSM1_HUMAN Isoform 3 of G-protein-signaling modulator 1 OS=Homo sapiens GN=GPSM1                                        |           |        |
| Q86YR5-4               | GPSM1_HUMAN Isoform 4 of G-protein-signaling modulator 1 OS=Homo sapiens GN=GPSM1                                        |           |        |
| Q86YR5;Q86YR5-4        | GPSM1_HUMAN G-protein-signaling modulator 1 OS=Homo sapiens GN=GPSM1 PE=1 SV=2;>sp Q86YR5-4 GPSM1_HUMAN Isoform 4        | 9.58E-06  |        |
| Q86YR6                 | POTED_HUMAN POTE ankyrin domain family member D OS=Homo sapiens GN=POTED PE=2 SV=2                                       |           |        |
| Q86YS6                 | RAB43_HUMAN Ras-related protein Rab-43 OS=Homo sapiens GN=RAB43 PE=1 SV=1                                                |           | 97.75  |
| Q86YV5                 | SG223_HUMAN Tyrosine-protein kinase SgK223 OS=Homo sapiens GN=SGK223 PE=1 SV=3                                           | 2.82E-12  |        |
| Q86YV6                 | MYLK4_HUMAN Myosin light chain kinase family member 4 OS=Homo sapiens GN=MYLK4 PE=1 SV=2                                 |           | 41.33  |
| Q86YZ3                 | HORN_HUMAN Hornerin OS=Homo sapiens GN=HRNR PE=1 SV=2                                                                    |           | 46.35  |
| Q8IU81                 | I2BP1_HUMAN Interferon regulatory factor 2-binding protein 1 OS=Homo sapiens GN=IRF2BP1 PE=1 SV=1                        | 6.02E-11  |        |
| Q8IUC4                 | RHPN2_HUMAN Rhoophilin-2 OS=Homo sapiens GN=RHPN2 PE=1 SV=1                                                              |           |        |
| Q8IUC6                 | TCAM1_HUMAN TIR domain-containing adapter molecule 1 OS=Homo sapiens GN=TICAM1 PE=1 SV=1                                 |           |        |
| Q8IUD2                 | RB6I2_HUMAN ELKS/Rab6-interacting/CAST family member 1 OS=Homo sapiens GN=ERC1 PE=1 SV=1                                 |           | 51.3   |
| Q8IUD2-2               | RB6I2_HUMAN Isoform 2 of ELKS/Rab6-interacting/CAST family member 1 OS=Homo sapiens GN=ERC1                              |           | 41.07  |
| Q8IUD2-2;Q8IUD2;Q8IUD2 | RB6I2_HUMAN Isoform 2 of ELKS/Rab6-interacting/CAST family member 1 OS=Homo sapiens GN=ERC1;>sp Q8IUD2 RB6I2_HUMA        | 9.82E-24  |        |
| Q8IUD2-3               | RB6I2_HUMAN Isoform 3 of ELKS/Rab6-interacting/CAST family member 1 OS=Homo sapiens GN=ERC1                              |           | 51.3   |
| Q8IUD2-4               | RB6I2_HUMAN Isoform 4 of ELKS/Rab6-interacting/CAST family member 1 OS=Homo sapiens GN=ERC1                              |           | 41.07  |
| Q8IUD2-5               | RB6I2_HUMAN Isoform 5 of ELKS/Rab6-interacting/CAST family member 1 OS=Homo sapiens GN=ERC1                              |           | 7.3    |
| Q8IUE6                 | H2A2B_HUMAN Histone H2A type 2-B OS=Homo sapiens GN=HIST2H2AB PE=1 SV=3                                                  |           | 104.62 |
| Q8IUF8                 | MINA_HUMAN MYC-induced nuclear antigen OS=Homo sapiens GN=MINA PE=1 SV=1                                                 |           | 55.25  |
| Q8IUF8-2               | MINA_HUMAN Isoform 2 of MYC-induced nuclear antigen OS=Homo sapiens GN=MINA                                              |           | 55.25  |
| Q8IUF8-4               | MINA_HUMAN Isoform 4 of MYC-induced nuclear antigen OS=Homo sapiens GN=MINA                                              |           | 55.25  |
| Q8IUF8;D3DN35;Q8IUF8-4 | MINA_HUMAN MYC-induced nuclear antigen OS=Homo sapiens GN=MINA PE=1 SV=1;>tr D3DN35 D3DN35_HUMAN MYC induced nuc         | 7.53E-10  |        |
| Q8IUG5;Q8IUG5-2        | MY18B_HUMAN Myosin-XVIIIb OS=Homo sapiens GN=MYO18B PE=1 SV=1;>sp Q8IUG5-2 MY18B_HUMAN Isoform 2 of Myosin-XVIII         | 8.10E-10  |        |
| Q8IUH3                 | RBM45_HUMAN RNA-binding protein 45 OS=Homo sapiens GN=RBM45 PE=1 SV=1                                                    |           |        |
| Q8IUH3-2               | RBM45_HUMAN Isoform 2 of RNA-binding protein 45 OS=Homo sapiens GN=RBM45                                                 |           |        |
| Q8IUH3-3               | RBM45_HUMAN Isoform 3 of RNA-binding protein 45 OS=Homo sapiens GN=RBM45                                                 |           |        |
| Q8IUI8                 | CRLF3_HUMAN Cytokine receptor-like factor 3 OS=Homo sapiens GN=CRLF3 PE=1 SV=2                                           | 1.94E-16  |        |
| Q8IUQ0                 | CLVS1_HUMAN Clavesin-1 OS=Homo sapiens GN=CLVS1 PE=1 SV=1                                                                |           | 4.91   |
| Q8IUQ0-2               | CLVS1_HUMAN Isoform 2 of Clavesin-1 OS=Homo sapiens GN=CLVS1                                                             |           | 4.91   |
| Q8IUR0                 | TPPC5_HUMAN Trafficking protein particle complex subunit 5 OS=Homo sapiens GN=TRAPPC5 PE=1 SV=1                          |           | 57.75  |
| Q8IUR6                 | CE041_HUMAN UPF0474 protein C5orf41 OS=Homo sapiens GN=C5orf41 PE=1 SV=2                                                 |           |        |
| Q8IUR6-2               | CE041_HUMAN Isoform 2 of UPF0474 protein C5orf41 OS=Homo sapiens GN=C5orf41                                              |           |        |
| Q8IUR6-3               | CE041_HUMAN Isoform 3 of UPF0474 protein C5orf41 OS=Homo sapiens GN=C5orf41                                              |           |        |
| Q8IUR7                 | ARMC8_HUMAN Armadillo repeat-containing protein 8 OS=Homo sapiens GN=ARMC8 PE=1 SV=2                                     |           |        |
| Q8IUR7-3               | ARMC8_HUMAN Isoform 3 of Armadillo repeat-containing protein 8 OS=Homo sapiens GN=ARMC8                                  |           |        |
| Q8IUX4                 | ABC3F_HUMAN DNA dC->dU-editing enzyme APOBEC-3F OS=Homo sapiens GN=APOBEC3F PE=1 SV=3                                    |           | 26.21  |
| Q8IUX7;Q8IUX7-2        | AEBP1_HUMAN Adipocyte enhancer-binding protein 1 OS=Homo sapiens GN=AEBP1 PE=1 SV=1;>sp Q8IUX7-2 AEBP1_HUMAN Isofor      | 2.78E-160 |        |
| Q8IUZ5                 | AT2L2_HUMAN Alanine--glyoxylate aminotransferase 2-like 2 OS=Homo sapiens GN=AGXT2L2 PE=2 SV=1                           |           |        |
| Q8IUZ5-2               | AT2L2_HUMAN Isoform 2 of Alanine--glyoxylate aminotransferase 2-like 2 OS=Homo sapiens GN=AGXT2L2                        |           |        |
| Q8IUZ5-3               | AT2L2_HUMAN Isoform 3 of Alanine--glyoxylate aminotransferase 2-like 2 OS=Homo sapiens GN=AGXT2L2                        |           |        |
| Q8IV08                 | PLD3_HUMAN Phospholipase D3 OS=Homo sapiens GN=PLD3 PE=1 SV=1                                                            |           | 46.78  |
| Q8IV33                 | K0825_HUMAN Uncharacterized protein KIAA0825 OS=Homo sapiens GN=KIAA0825 PE=2 SV=2                                       |           |        |
| Q8IV33-2               | K0825_HUMAN Isoform 2 of Uncharacterized protein KIAA0825 OS=Homo sapiens GN=KIAA0825                                    |           |        |
| Q8IV33-3               | K0825_HUMAN Isoform 3 of Uncharacterized protein KIAA0825 OS=Homo sapiens GN=KIAA0825                                    |           |        |
| Q8IV36                 | CQ028_HUMAN UPF0663 transmembrane protein C17orf28 OS=Homo sapiens GN=C17orf28 PE=1 SV=1                                 |           | 44.73  |
| Q8IV36-2               | CQ028_HUMAN Isoform 2 of UPF0663 transmembrane protein C17orf28 OS=Homo sapiens GN=C17orf28                              |           | 44.73  |
| Q8IV36-3               | CQ028_HUMAN Isoform 3 of UPF0663 transmembrane protein C17orf28 OS=Homo sapiens GN=C17orf28                              |           | 44.73  |
| Q8IV36;Q8IV36-2;Q8IV36 | CQ028_HUMAN UPF0663 transmembrane protein C17orf28 OS=Homo sapiens GN=C17orf28 PE=1 SV=1;>sp Q8IV36-2 CQ028_HUM/         | 4.20E-39  |        |

|                        |                                                                                                                          |           |        |
|------------------------|--------------------------------------------------------------------------------------------------------------------------|-----------|--------|
| Q8IV48                 | ERI1_HUMAN 3'-5' exoribonuclease 1 OS=Homo sapiens GN=ERI1 PE=1 SV=3                                                     |           | 27.17  |
| Q8IV76                 | PASD1_HUMAN PAS domain-containing protein 1 OS=Homo sapiens GN=PASD1 PE=2 SV=1                                           |           |        |
| Q8IV76-2               | PASD1_HUMAN Isoform 2 of PAS domain-containing protein 1 OS=Homo sapiens GN=PASD1                                        |           |        |
| Q8IVD9                 | NUDC3_HUMAN NudC domain-containing protein 3 OS=Homo sapiens GN=NUDC3 PE=1 SV=3                                          | 2.87E-16  |        |
| Q8IVE0                 | CROL2_HUMAN Putative ciliary rootlet coiled-coil protein-like 2 protein OS=Homo sapiens GN=CROCCP3 PE=5 SV=1             |           | 21.61  |
| Q8IVE3                 | PKHH2_HUMAN Pleckstrin homology domain-containing family H member 2 OS=Homo sapiens GN=PLEKHH2 PE=2 SV=2                 |           | 63.19  |
| Q8IVE3-2               | PKHH2_HUMAN Isoform 2 of Pleckstrin homology domain-containing family H member 2 OS=Homo sapiens GN=PLEKHH2              |           | 9.67   |
| Q8IVE3-3               | PKHH2_HUMAN Isoform 3 of Pleckstrin homology domain-containing family H member 2 OS=Homo sapiens GN=PLEKHH2              |           | 59.73  |
| Q8IVF2                 | AHNAK2_HUMAN Protein AHNAK2 OS=Homo sapiens GN=AHNAK2 PE=1 SV=2                                                          |           |        |
| Q8IVF2-2               | AHNAK2_HUMAN Isoform 2 of Protein AHNAK2 OS=Homo sapiens GN=AHNAK2                                                       |           |        |
| Q8IVF2-3               | AHNAK2_HUMAN Isoform 3 of Protein AHNAK2 OS=Homo sapiens GN=AHNAK2                                                       |           |        |
| Q8IVF2;Q8IVF2-3        | AHNAK2_HUMAN Protein AHNAK2 OS=Homo sapiens GN=AHNAK2 PE=1 SV=2;>sp Q8IVF2-3 AHNAK2_HUMAN Isoform 3 of Protein AHNAK2    | 5.82E-09  |        |
| Q8IVF4                 | DYH10_HUMAN Dynein heavy chain 10, axonemal OS=Homo sapiens GN=DNAH10 PE=1 SV=4                                          |           |        |
| Q8IVF6                 | AN18A_HUMAN Ankyrin repeat domain-containing protein 18A OS=Homo sapiens GN=ANKRD18A PE=1 SV=3                           |           |        |
| Q8IVH2                 | FOXP4_HUMAN Forkhead box protein P4 OS=Homo sapiens GN=FOXP4 PE=1 SV=1                                                   |           |        |
| Q8IVL0                 | NAV3_HUMAN Neuron navigator 3 OS=Homo sapiens GN=NAV3 PE=1 SV=3                                                          |           |        |
| Q8IVL0-2               | NAV3_HUMAN Isoform 2 of Neuron navigator 3 OS=Homo sapiens GN=NAV3                                                       |           |        |
| Q8IVL0-3               | NAV3_HUMAN Isoform 3 of Neuron navigator 3 OS=Homo sapiens GN=NAV3                                                       |           |        |
| Q8IVL6;Q59FY9;Q8IVL6-2 | P3H3_HUMAN Prolyl 3-hydroxylase 3 OS=Homo sapiens GN=LEPREL2 PE=2 SV=1;>tr Q59FY9 Q59FY9_HUMAN LEPREL2 protein varia     | 1.20E-16  |        |
| Q8IVM0                 | CCD50_HUMAN Coiled-coil domain-containing protein 50 OS=Homo sapiens GN=CCDC50 PE=1 SV=1                                 |           | 47.08  |
| Q8IVM0-2               | CCD50_HUMAN Isoform 2 of Coiled-coil domain-containing protein 50 OS=Homo sapiens GN=CCDC50                              |           | 58.13  |
| Q8IVM0-2;Q8IVM0        | 2 CCD50_HUMAN Isoform 2 of Coiled-coil domain-containing protein 50 OS=Homo sapiens GN=CCDC50;>sp Q8IVM0 CCD50_HUMAN     | 4.43E-29  |        |
| Q8IVN8                 | RPESP_HUMAN RPE-spondin OS=Homo sapiens GN=RPESP PE=1 SV=2                                                               | 1.28E-15  |        |
| Q8IVS8                 | GLCTK_HUMAN Glycerate kinase OS=Homo sapiens GN=GLYCTK PE=1 SV=1                                                         |           |        |
| Q8IVS8-2               | GLCTK_HUMAN Isoform 2 of Glycerate kinase OS=Homo sapiens GN=GLYCTK                                                      |           |        |
| Q8IVS8-3               | GLCTK_HUMAN Isoform 3 of Glycerate kinase OS=Homo sapiens GN=GLYCTK                                                      |           |        |
| Q8IVS8-4               | GLCTK_HUMAN Isoform 4 of Glycerate kinase OS=Homo sapiens GN=GLYCTK                                                      |           |        |
| Q8IVS8-7               | GLCTK_HUMAN Isoform 7 of Glycerate kinase OS=Homo sapiens GN=GLYCTK                                                      |           |        |
| Q8IVT2                 | CS021_HUMAN Uncharacterized protein C19orf21 OS=Homo sapiens GN=C19orf21 PE=1 SV=1                                       | 2.56E-27  |        |
| Q8IW35-2;Q8IW35        | 2 CEP97_HUMAN Isoform 2 of Centrosomal protein of 97 kDa OS=Homo sapiens GN=CEP97;>sp Q8IW35 CEP97_HUMAN Centrosoma      | 6.81E-21  |        |
| Q8IW35;Q8IW35-2        | CEP97_HUMAN Centrosomal protein of 97 kDa OS=Homo sapiens GN=CEP97 PE=1 SV=1;>sp Q8IW35-2 CEP97_HUMAN Isoform 2 of       | 6.61E-09  |        |
| Q8IW45-2;Q8IW45;B4DK   | 2 CARKD_HUMAN Isoform 2 of Carbohydrate kinase domain-containing protein OS=Homo sapiens GN=CARKD;>sp Q8IW45 CARKD_H     | 2.56E-23  |        |
| Q8IWA0                 | WDR75_HUMAN WD repeat-containing protein 75 OS=Homo sapiens GN=WDR75 PE=1 SV=1                                           |           |        |
| Q8IWA5                 | CTL2_HUMAN Choline transporter-like protein 2 OS=Homo sapiens GN=SLC44A2 PE=1 SV=3                                       |           | 126.28 |
| Q8IWA5-2               | CTL2_HUMAN Isoform 2 of Choline transporter-like protein 2 OS=Homo sapiens GN=SLC44A2                                    |           | 126.28 |
| Q8IWA5-2;Q8IWA5;Q8IW   | 2 CTL2_HUMAN Isoform 2 of Choline transporter-like protein 2 OS=Homo sapiens GN=SLC44A2;>sp Q8IWA5 CTL2_HUMAN Choline tr | 3.74E-12  |        |
| Q8IWA5;Q8IWA5-2;B3KNI  | CTL2_HUMAN Choline transporter-like protein 2 OS=Homo sapiens GN=SLC44A2 PE=1 SV=3;>sp Q8IWA5-2 CTL2_HUMAN Isoform 2     | 8.31E-08  |        |
| Q8IWA6                 | CCD60_HUMAN Coiled-coil domain-containing protein 60 OS=Homo sapiens GN=CCDC60 PE=2 SV=2                                 |           |        |
| Q8IWB7                 | WDFY1_HUMAN WD repeat and FYVE domain-containing protein 1 OS=Homo sapiens GN=WDFY1 PE=1 SV=1                            | 5.39E-22  |        |
| Q8IWC1                 | MA7D3_HUMAN MAP7 domain-containing protein 3 OS=Homo sapiens GN=MAP7D3 PE=1 SV=2                                         |           | 102.68 |
| Q8IWC1-2               | MA7D3_HUMAN Isoform 2 of MAP7 domain-containing protein 3 OS=Homo sapiens GN=MAP7D3                                      |           | 102.68 |
| Q8IWC1-3               | MA7D3_HUMAN Isoform 3 of MAP7 domain-containing protein 3 OS=Homo sapiens GN=MAP7D3                                      |           | 102.68 |
| Q8IWC1;B4DWD2;Q8IWC    | MA7D3_HUMAN MAP7 domain-containing protein 3 OS=Homo sapiens GN=MAP7D3 PE=1 SV=2;>tr B4DWD2 B4DWD2_HUMAN cDNA            | 1.20E-08  |        |
| Q8IWE2                 | NXP20_HUMAN Protein NOXP20 OS=Homo sapiens GN=FAM114A1 PE=1 SV=2                                                         | 1.45E-299 |        |
| Q8IWE4                 | DCNL3_HUMAN DCN1-like protein 3 OS=Homo sapiens GN=DCUN1D3 PE=2 SV=1                                                     |           | 42.28  |
| Q8IWJ2                 | GCC2_HUMAN GRIP and coiled-coil domain-containing protein 2 OS=Homo sapiens GN=GCC2 PE=1 SV=4                            |           |        |
| Q8IWJ2-3               | GCC2_HUMAN Isoform 2 of GRIP and coiled-coil domain-containing protein 2 OS=Homo sapiens GN=GCC2                         |           |        |
| Q8IWJ2;D3DX70;B9EK47;  | GCC2_HUMAN GRIP and coiled-coil domain-containing protein 2 OS=Homo sapiens GN=GCC2 PE=1 SV=4;>tr D3DX70 D3DX70_HUM      | 4.54E-08  |        |
| Q8IWK6                 | GP125_HUMAN Probable G-protein coupled receptor 125 OS=Homo sapiens GN=GPR125 PE=1 SV=2                                  |           |        |
| Q8IWK6-3               | GP125_HUMAN Isoform 3 of Probable G-protein coupled receptor 125 OS=Homo sapiens GN=GPR125                               |           |        |
| Q8IWQ3-4               | BRSK2_HUMAN Isoform 4 of BR serine/threonine-protein kinase 2 OS=Homo sapiens GN=BRSK2                                   |           | 17.06  |
| Q8IWR1                 | TRI59_HUMAN Tripartite motif-containing protein 59 OS=Homo sapiens GN=TRIM59 PE=2 SV=1                                   |           | 23.69  |
| Q8IWS0                 | PHF6_HUMAN PHD finger protein 6 OS=Homo sapiens GN=PHF6 PE=1 SV=1                                                        |           |        |
| Q8IWS0-2               | PHF6_HUMAN Isoform 2 of PHD finger protein 6 OS=Homo sapiens GN=PHF6                                                     |           |        |
| Q8IWS0;Q8IWS0-2        | PHF6_HUMAN PHD finger protein 6 OS=Homo sapiens GN=PHF6 PE=1 SV=1;>sp Q8IWS0-2 PHF6_HUMAN Isoform 2 of PHD finger pr     | 2.81E-06  |        |
| Q8IWT6                 | LRC8A_HUMAN Leucine-rich repeat-containing protein 8A OS=Homo sapiens GN=LRRRC8A PE=1 SV=1                               |           | 31.46  |
| Q8IWU9                 | TPH2_HUMAN Tryptophan 5-hydroxylase 2 OS=Homo sapiens GN=TPH2 PE=1 SV=1                                                  |           |        |
| Q8IWU9-2               | TPH2_HUMAN Isoform b of Tryptophan 5-hydroxylase 2 OS=Homo sapiens GN=TPH2                                               |           |        |
| Q8I WV8                | UBR2_HUMAN E3 ubiquitin-protein ligase UBR2 OS=Homo sapiens GN=UBR2 PE=1 SV=1                                            |           | 17.27  |
| Q8I WV8-2              | UBR2_HUMAN Isoform 2 of E3 ubiquitin-protein ligase UBR2 OS=Homo sapiens GN=UBR2                                         |           |        |
| Q8I WV8-3              | UBR2_HUMAN Isoform 3 of E3 ubiquitin-protein ligase UBR2 OS=Homo sapiens GN=UBR2                                         |           |        |

|                          |                                                                                                                         |          |        |
|--------------------------|-------------------------------------------------------------------------------------------------------------------------|----------|--------|
| Q8IWW8-4                 | UBR2_HUMAN Isoform 4 of E3 ubiquitin-protein ligase UBR2 OS=Homo sapiens GN=UBR2                                        |          | 17.27  |
| Q8IWW8;Q8IWW8-4          | UBR2_HUMAN E3 ubiquitin-protein ligase UBR2 OS=Homo sapiens GN=UBR2 PE=1 SV=1;>sp Q8IWW8-4 UBR2_HUMAN Isoform 4 of      | 5.25E-09 |        |
| Q8IWW6;Q8IWW6-2;Q8IWW6-2 | RHG12_HUMAN Rho GTPase-activating protein 12 OS=Homo sapiens GN=ARHGAP12 PE=1 SV=1;>sp Q8IWW6-2 RHG12_HUMAN Iso         | 3.23E-12 |        |
| Q8IWX8                   | CHERP_HUMAN Calcium homeostasis endoplasmic reticulum protein OS=Homo sapiens GN=CHERP PE=1 SV=3                        |          |        |
| Q8IWIY4                  | SCUB1_HUMAN Signal peptide, CUB and EGF-like domain-containing protein 1 OS=Homo sapiens GN=SCUBE1 PE=1 SV=3            |          |        |
| Q8IWX3-4;Q8IWX3          | 4 ANKH1_HUMAN Isoform 4 of Ankyrin repeat and KH domain-containing protein 1 OS=Homo sapiens GN=ANKHD1;>sp Q8IWX3 ANK   | 6.58E-21 |        |
| Q8IX01                   | SUGP2_HUMAN SURP and G-patch domain-containing protein 2 OS=Homo sapiens GN=SUGP2 PE=1 SV=2                             |          |        |
| Q8IX01-3                 | SUGP2_HUMAN Isoform 3 of SURP and G-patch domain-containing protein 2 OS=Homo sapiens GN=SUGP2                          |          |        |
| Q8IX01-4                 | SUGP2_HUMAN Isoform 4 of SURP and G-patch domain-containing protein 2 OS=Homo sapiens GN=SUGP2                          |          |        |
| Q8IX01;Q8IX01-3;Q8IX01   | SUGP2_HUMAN SURP and G-patch domain-containing protein 2 OS=Homo sapiens GN=SUGP2 PE=1 SV=2;>sp Q8IX01-3 SUGP2_HU       | 1.91E-14 |        |
| Q8IX12                   | CCAR1_HUMAN Cell division cycle and apoptosis regulator protein 1 OS=Homo sapiens GN=CCAR1 PE=1 SV=2                    |          | 225.59 |
| Q8IX12-2                 | CCAR1_HUMAN Isoform 2 of Cell division cycle and apoptosis regulator protein 1 OS=Homo sapiens GN=CCAR1                 |          | 225.59 |
| Q8IX12;Q8IX12-2          | CCAR1_HUMAN Cell division cycle and apoptosis regulator protein 1 OS=Homo sapiens GN=CCAR1 PE=1 SV=2;>sp Q8IX12-2 CCAR1 | 1.03E-48 |        |
| Q8IX18                   | DHX40_HUMAN Probable ATP-dependent RNA helicase DHX40 OS=Homo sapiens GN=DHX40 PE=1 SV=2                                |          | 35.68  |
| Q8IX18-2                 | DHX40_HUMAN Isoform 2 of Probable ATP-dependent RNA helicase DHX40 OS=Homo sapiens GN=DHX40                             |          | 35.68  |
| Q8IX18-3                 | DHX40_HUMAN Isoform 3 of Probable ATP-dependent RNA helicase DHX40 OS=Homo sapiens GN=DHX40                             |          | 36.32  |
| Q8IX21                   | F178A_HUMAN Protein FAM178A OS=Homo sapiens GN=FAM178A PE=1 SV=2                                                        |          |        |
| Q8IX90                   | SKA3_HUMAN Spindle and kinetochore-associated protein 3 OS=Homo sapiens GN=SKA3 PE=1 SV=2                               |          | 22.86  |
| Q8IX90-3                 | SKA3_HUMAN Isoform 3 of Spindle and kinetochore-associated protein 3 OS=Homo sapiens GN=SKA3                            |          | 22.86  |
| Q8IXB1                   | DJC10_HUMAN DnaJ homolog subfamily C member 10 OS=Homo sapiens GN=DNAJC10 PE=1 SV=2                                     |          | 108.12 |
| Q8IXB1-2                 | DJC10_HUMAN Isoform 2 of DnaJ homolog subfamily C member 10 OS=Homo sapiens GN=DNAJC10                                  |          | 108.12 |
| Q8IXB1;B3KNK5;Q8IXB1     | DJC10_HUMAN DnaJ homolog subfamily C member 10 OS=Homo sapiens GN=DNAJC10 PE=1 SV=2;>tr B3KNK5 B3KNK5_HUMAN cD          | 4.20E-25 |        |
| Q8IXF0-3                 | NPAS3_HUMAN Isoform 3 of Neuronal PAS domain-containing protein 3 OS=Homo sapiens GN=NPAS3                              |          |        |
| Q8IXH7                   | NELFD_HUMAN Negative elongation factor C/D OS=Homo sapiens GN=TH1L PE=1 SV=2                                            |          | 54.14  |
| Q8IXH7-3                 | NELFD_HUMAN Isoform 3 of Negative elongation factor C/D OS=Homo sapiens GN=TH1L                                         |          |        |
| Q8IXH7-4                 | NELFD_HUMAN Isoform NELF-D of Negative elongation factor C/D OS=Homo sapiens GN=TH1L                                    |          | 54.14  |
| Q8IXH7;Q8IXH7-4          | NELFD_HUMAN Negative elongation factor C/D OS=Homo sapiens GN=TH1L PE=1 SV=2;>sp Q8IXH7-4 NELFD_HUMAN Isoform NELF      | 2.63E-14 |        |
| Q8IXI1                   | MIRO2_HUMAN Mitochondrial Rho GTPase 2 OS=Homo sapiens GN=RHOT2 PE=1 SV=2                                               |          | 46.15  |
| Q8IXJ6;Q8IXJ6-4;A7VJH3   | SIRT2_HUMAN NAD-dependent deacetylase sirtuin-2 OS=Homo sapiens GN=SIRT2 PE=1 SV=2;>sp Q8IXJ6-4 SIRT2_HUMAN Isoform     | 6.39E-09 |        |
| Q8IXK0                   | PHC2_HUMAN Polyhomeotic-like protein 2 OS=Homo sapiens GN=PHC2 PE=1 SV=1                                                |          | 87.89  |
| Q8IXK0-2                 | PHC2_HUMAN Isoform 2 of Polyhomeotic-like protein 2 OS=Homo sapiens GN=PHC2                                             |          | 87.89  |
| Q8IXK0-3                 | PHC2_HUMAN Isoform 3 of Polyhomeotic-like protein 2 OS=Homo sapiens GN=PHC2                                             |          | 52.52  |
| Q8IXK0-4                 | PHC2_HUMAN Isoform 4 of Polyhomeotic-like protein 2 OS=Homo sapiens GN=PHC2                                             |          | 87.89  |
| Q8IXK0-5                 | PHC2_HUMAN Isoform 5 of Polyhomeotic-like protein 2 OS=Homo sapiens GN=PHC2                                             |          | 87.89  |
| Q8IXL7                   | MSRB3_HUMAN Methionine-R-sulfoxide reductase B3, mitochondrial OS=Homo sapiens GN=MSRB3 PE=1 SV=1                       | 4.75E-12 |        |
| Q8IXL7-2                 | 2 MSRB3_HUMAN Isoform 2 of Methionine-R-sulfoxide reductase B3 OS=Homo sapiens GN=MSRB3                                 | 1.66E-06 |        |
| Q8IXM2                   | BAP18_HUMAN Chromatin complexes subunit BAP18 OS=Homo sapiens GN=BAP18 PE=1 SV=1                                        |          | 235.93 |
| Q8IXM3                   | RM41_HUMAN 39S ribosomal protein L41, mitochondrial OS=Homo sapiens GN=MRPL41 PE=1 SV=1                                 |          | 149.76 |
| Q8IXM6                   | NRM_HUMAN Nurim OS=Homo sapiens GN=NRM PE=1 SV=1                                                                        |          |        |
| Q8IXM6-2                 | NRM_HUMAN Isoform 2 of Nurim OS=Homo sapiens GN=NRM                                                                     |          |        |
| Q8IXN7                   | RIMKA_HUMAN N-acetylaspartyl-glutamate synthetase A OS=Homo sapiens GN=RIMKLA PE=2 SV=2                                 |          |        |
| Q8IXQ6;Q8IXQ6-2          | PARP9_HUMAN Poly [ADP-ribose] polymerase 9 OS=Homo sapiens GN=PARP9 PE=1 SV=2;>sp Q8IXQ6-2 PARP9_HUMAN Isoform 2 o      | 9.69E-28 |        |
| Q8IXS2                   | CCD65_HUMAN Coiled-coil domain-containing protein 65 OS=Homo sapiens GN=CCDC65 PE=1 SV=2                                |          |        |
| Q8IXS2-2                 | CCD65_HUMAN Isoform 2 of Coiled-coil domain-containing protein 65 OS=Homo sapiens GN=CCDC65                             |          |        |
| Q8IXT5                   | RB12B_HUMAN RNA-binding protein 12B OS=Homo sapiens GN=RBM12B PE=1 SV=2                                                 |          |        |
| Q8IY17                   | PLPL6_HUMAN Neuropathy target esterase OS=Homo sapiens GN=PNPLA6 PE=1 SV=2                                              |          |        |
| Q8IY17-2                 | PLPL6_HUMAN Isoform 2 of Neuropathy target esterase OS=Homo sapiens GN=PNPLA6                                           |          |        |
| Q8IY17-3                 | PLPL6_HUMAN Isoform 3 of Neuropathy target esterase OS=Homo sapiens GN=PNPLA6                                           |          |        |
| Q8IY17;Q8IY17-3;Q8IY17   | PLPL6_HUMAN Neuropathy target esterase OS=Homo sapiens GN=PNPLA6 PE=1 SV=2;>sp Q8IY17-3 PLPL6_HUMAN Isoform 3 of Nei    | 1.04E-32 |        |
| Q8IY21                   | DDX60_HUMAN Probable ATP-dependent RNA helicase DDX60 OS=Homo sapiens GN=DDX60 PE=2 SV=3                                |          | 33.06  |
| Q8IY33-2;Q8IY33;Q8IY33   | 2 MILK2_HUMAN Isoform 2 of MICAL-like protein 2 OS=Homo sapiens GN=MICALL2;>sp Q8IY33 MILK2_HUMAN MICAL-like protein 2  | 8.27E-11 |        |
| Q8IY37                   | DHX37_HUMAN Probable ATP-dependent RNA helicase DHX37 OS=Homo sapiens GN=DHX37 PE=1 SV=1                                |          |        |
| Q8IY63;Q8IY63-2          | AMOL1_HUMAN Angiomotin-like protein 1 OS=Homo sapiens GN=AMOTL1 PE=1 SV=1;>sp Q8IY63-2 AMOL1_HUMAN Isoform 2 of An      | 3.54E-10 |        |
| Q8IY67                   | RAVR1_HUMAN Ribonucleoprotein PTB-binding 1 OS=Homo sapiens GN=RAVER1 PE=1 SV=1                                         |          | 77.07  |
| Q8IY67-2                 | RAVR1_HUMAN Isoform 2 of Ribonucleoprotein PTB-binding 1 OS=Homo sapiens GN=RAVER1                                      |          | 123.96 |
| Q8IY67-2;Q8IY67          | 2 RAVR1_HUMAN Isoform 2 of Ribonucleoprotein PTB-binding 1 OS=Homo sapiens GN=RAVER1;>sp Q8IY67 RAVR1_HUMAN Ribonucl    | 4.96E-95 |        |
| Q8IY67-3                 | RAVR1_HUMAN Isoform 3 of Ribonucleoprotein PTB-binding 1 OS=Homo sapiens GN=RAVER1                                      |          |        |
| Q8IY81                   | RRM3_HUMAN Putative rRNA methyltransferase 3 OS=Homo sapiens GN=FTSJ3 PE=1 SV=2                                         |          | 126.87 |
| Q8IY92                   | SLX4_HUMAN Structure-specific endonuclease subunit SLX4 OS=Homo sapiens GN=SLX4 PE=1 SV=3                               |          |        |
| Q8IY92-2                 | SLX4_HUMAN Isoform 2 of Structure-specific endonuclease subunit SLX4 OS=Homo sapiens GN=SLX4                            |          |        |
| Q8IYA2                   | C144C_HUMAN Coiled-coil domain-containing protein 144C OS=Homo sapiens GN=CCDC144C PE=2 SV=3                            |          |        |



|                        |                                                                                                                           |          |          |
|------------------------|---------------------------------------------------------------------------------------------------------------------------|----------|----------|
| Q8IYA6                 | CKP2L_HUMAN Cytoskeleton-associated protein 2-like OS=Homo sapiens GN=CKAP2L PE=1 SV=4                                    |          |          |
| Q8IYA6-2               | CKP2L_HUMAN Isoform 2 of Cytoskeleton-associated protein 2-like OS=Homo sapiens GN=CKAP2L                                 |          |          |
| Q8IYB3                 | SRRM1_HUMAN Serine/arginine repetitive matrix protein 1 OS=Homo sapiens GN=SRRM1 PE=1 SV=2                                |          | 200.06   |
| Q8IYB3-2               | SRRM1_HUMAN Isoform 2 of Serine/arginine repetitive matrix protein 1 OS=Homo sapiens GN=SRRM1                             |          | 200.06   |
| Q8IYB3;Q8IYB3-2        | SRRM1_HUMAN Serine/arginine repetitive matrix protein 1 OS=Homo sapiens GN=SRRM1 PE=1 SV=2;>sp Q8IYB3-2 SRRM1_HUMAN       | 1.69E-59 |          |
| Q8IYB7                 | DI3L2_HUMAN DIS3-like exonuclease 2 OS=Homo sapiens GN=DIS3L2 PE=1 SV=4                                                   |          | 1.63E-72 |
| Q8IYB8                 | SUV3_HUMAN ATP-dependent RNA helicase SUPV3L1, mitochondrial OS=Homo sapiens GN=SUPV3L1 PE=1 SV=1                         |          | 4.95E-05 |
| Q8IYD1                 | ERF3B_HUMAN Eukaryotic peptide chain release factor GTP-binding subunit ERF3B OS=Homo sapiens GN=GSPT2 PE=1 SV=2          |          | 3.57E-30 |
| Q8IYE0                 | CC146_HUMAN Coiled-coil domain-containing protein 146 OS=Homo sapiens GN=CCDC146 PE=2 SV=2                                |          | 63.45    |
| Q8IYE0-2               | CC146_HUMAN Isoform 2 of Coiled-coil domain-containing protein 146 OS=Homo sapiens GN=CCDC146                             |          | 46.45    |
| Q8IYE1                 | CCD13_HUMAN Coiled-coil domain-containing protein 13 OS=Homo sapiens GN=CCDC13 PE=2 SV=2                                  |          |          |
| Q8IYF3                 | TEX11_HUMAN Testis-expressed sequence 11 protein OS=Homo sapiens GN=TEX11 PE=1 SV=3                                       |          | 28.44    |
| Q8IYF3-2               | TEX11_HUMAN Isoform 2 of Testis-expressed sequence 11 protein OS=Homo sapiens GN=TEX11                                    |          | 28.25    |
| Q8IYF3-3               | TEX11_HUMAN Isoform 3 of Testis-expressed sequence 11 protein OS=Homo sapiens GN=TEX11                                    |          | 28.44    |
| Q8IYI6                 | EXOC8_HUMAN Exocyst complex component 8 OS=Homo sapiens GN=EXOC8 PE=1 SV=2                                                |          | 86.15    |
| Q8IYJ1                 | CPNE9_HUMAN Copine-9 OS=Homo sapiens GN=CPNE9 PE=1 SV=3                                                                   |          |          |
| Q8IYJ1-2               | CPNE9_HUMAN Isoform 2 of Copine-9 OS=Homo sapiens GN=CPNE9                                                                |          |          |
| Q8IYK4                 | GT252_HUMAN Procollagen galactosyltransferase 2 OS=Homo sapiens GN=GLT25D2 PE=1 SV=1                                      |          |          |
| Q8IYM9;Q8IYM9-2        | TRI22_HUMAN E3 ubiquitin-protein ligase TRIM22 OS=Homo sapiens GN=TRIM22 PE=1 SV=1;>sp Q8IYM9-2 TRI22_HUMAN Isoform       | 5.46E-26 |          |
| Q8IYS0                 | GRM1C_HUMAN GRAM domain-containing protein 1C OS=Homo sapiens GN=GRAMD1C PE=2 SV=2                                        |          |          |
| Q8IYS0-2               | GRM1C_HUMAN Isoform 2 of GRAM domain-containing protein 1C OS=Homo sapiens GN=GRAMD1C                                     |          |          |
| Q8IYS1                 | P20D2_HUMAN Peptidase M20 domain-containing protein 2 OS=Homo sapiens GN=PM20D2 PE=1 SV=2                                 |          | 1.88E-10 |
| Q8IYT4                 | KATL2_HUMAN Katanin p60 ATPase-containing subunit A-like 2 OS=Homo sapiens GN=KATNAL2 PE=2 SV=3                           |          | 77.63    |
| Q8IYT4-2               | KATL2_HUMAN Isoform 2 of Katanin p60 ATPase-containing subunit A-like 2 OS=Homo sapiens GN=KATNAL2                        |          | 77.63    |
| Q8IYT4;Q8IYT4-2        | KATL2_HUMAN Katanin p60 ATPase-containing subunit A-like 2 OS=Homo sapiens GN=KATNAL2 PE=2 SV=3;>sp Q8IYT4-2 KATL2_HU     | 2.86E-09 |          |
| Q8IYT8                 | ULK2_HUMAN Serine/threonine-protein kinase ULK2 OS=Homo sapiens GN=ULK2 PE=1 SV=3                                         |          | 25.57    |
| Q8IYU4                 | UBQLN_HUMAN Ubiquilin-like protein OS=Homo sapiens GN=UBQLNL PE=2 SV=3                                                    |          | 26.12    |
| Q8IYU4-2               | UBQLN_HUMAN Isoform 2 of Ubiquilin-like protein OS=Homo sapiens GN=UBQLNL                                                 |          | 26.12    |
| Q8IYU8                 | EFHA1_HUMAN EF-hand domain-containing family member A1 OS=Homo sapiens GN=EFHA1 PE=1 SV=2                                 |          | 5.06E-11 |
| Q8IZ40                 | RCOR2_HUMAN REST corepressor 2 OS=Homo sapiens GN=RCOR2 PE=2 SV=2                                                         |          | 24.43    |
| Q8IZ83                 | A16A1_HUMAN Aldehyde dehydrogenase family 16 member A1 OS=Homo sapiens GN=ALDH16A1 PE=1 SV=2                              |          | 3.14E-50 |
| Q8IZC4                 | RTKN2_HUMAN Rhotekin-2 OS=Homo sapiens GN=RTKN2 PE=2 SV=1                                                                 |          |          |
| Q8IZC4-2               | RTKN2_HUMAN Isoform 2 of Rhotekin-2 OS=Homo sapiens GN=RTKN2                                                              |          |          |
| Q8IZC4-3               | RTKN2_HUMAN Isoform 3 of Rhotekin-2 OS=Homo sapiens GN=RTKN2                                                              |          |          |
| Q8IZC6                 | CORA1_HUMAN Collagen alpha-1(XXVII) chain OS=Homo sapiens GN=COL27A1 PE=1 SV=1                                            |          |          |
| Q8IZC6-3               | CORA1_HUMAN Isoform 3 of Collagen alpha-1(XXVII) chain OS=Homo sapiens GN=COL27A1                                         |          |          |
| Q8IZE3;Q8IZE3-2        | PACE1_HUMAN Protein-associating with the carboxyl-terminal domain of ezrin OS=Homo sapiens GN=SCYL3 PE=1 SV=3;>sp Q8IZE3  | 5.30E-13 |          |
| Q8IZF6                 | GP112_HUMAN Probable G-protein coupled receptor 112 OS=Homo sapiens GN=GPR112 PE=2 SV=2                                   |          | 45.88    |
| Q8IZF6-2               | GP112_HUMAN Isoform 2 of Probable G-protein coupled receptor 112 OS=Homo sapiens GN=GPR112                                |          | 44.82    |
| Q8IZF6-3               | GP112_HUMAN Isoform 3 of Probable G-protein coupled receptor 112 OS=Homo sapiens GN=GPR112                                |          | 5.3      |
| Q8IZH2;Q8IZH2-2        | XRN1_HUMAN 5-3 exoribonuclease 1 OS=Homo sapiens GN=XRN1 PE=1 SV=1;>sp Q8IZH2-2 XRN1_HUMAN Isoform 2 of 5-3 exoribc       | 7.37E-06 |          |
| Q8IZJ1                 | UNC5B_HUMAN Netrin receptor UNC5B OS=Homo sapiens GN=UNC5B PE=1 SV=2                                                      |          |          |
| Q8IZJ1-2               | UNC5B_HUMAN Isoform 2 of Netrin receptor UNC5B OS=Homo sapiens GN=UNC5B                                                   |          |          |
| Q8IZL8                 | PELP1_HUMAN Proline-, glutamic acid- and leucine-rich protein 1 OS=Homo sapiens GN=PELP1 PE=1 SV=2                        |          |          |
| Q8IZL8-2               | PELP1_HUMAN Isoform 2 of Proline-, glutamic acid- and leucine-rich protein 1 OS=Homo sapiens GN=PELP1                     |          |          |
| Q8IZL8;Q8IZL8-2        | PELP1_HUMAN Proline-, glutamic acid- and leucine-rich protein 1 OS=Homo sapiens GN=PELP1 PE=1 SV=2;>sp Q8IZL8-2 PELP1_HUI | 8.08E-74 |          |
| Q8IZL9                 | CDK20_HUMAN Cyclin-dependent kinase 20 OS=Homo sapiens GN=CDK20 PE=1 SV=1                                                 |          | 54.71    |
| Q8IZL9-2               | CDK20_HUMAN Isoform 2 of Cyclin-dependent kinase 20 OS=Homo sapiens GN=CDK20                                              |          | 59.16    |
| Q8IZL9-3               | CDK20_HUMAN Isoform 3 of Cyclin-dependent kinase 20 OS=Homo sapiens GN=CDK20                                              |          | 61.76    |
| Q8IZN3                 | ZDH14_HUMAN Probable palmitoyltransferase ZDHHC14 OS=Homo sapiens GN=ZDHHC14 PE=1 SV=1                                    |          | 21.77    |
| Q8IZN3-2               | ZDH14_HUMAN Isoform 2 of Probable palmitoyltransferase ZDHHC14 OS=Homo sapiens GN=ZDHHC14                                 |          | 21.77    |
| Q8IZP0;Q8IZP0-9;Q8IZP0 | ABI1_HUMAN Abl interactor 1 OS=Homo sapiens GN=ABI1 PE=1 SV=4;>sp Q8IZP0-9 ABI1_HUMAN Isoform 9 of Abl interactor 1 OS=   | 2.71E-26 |          |
| Q8IZP2                 | ST134_HUMAN Putative protein FAM10A4 OS=Homo sapiens GN=ST13P4 PE=5 SV=1                                                  |          | 123.18   |
| Q8IZQ5                 | SELH_HUMAN Selenoprotein H OS=Homo sapiens GN=SELH PE=1 SV=2                                                              |          | 129.83   |
| Q8IZT6                 | ASPM_HUMAN Abnormal spindle-like microcephaly-associated protein OS=Homo sapiens GN=ASPM PE=1 SV=2                        |          |          |
| Q8IZT6-2               | ASPM_HUMAN Isoform 2 of Abnormal spindle-like microcephaly-associated protein OS=Homo sapiens GN=ASPM                     |          |          |
| Q8IZU1                 | FAM9A_HUMAN Protein FAM9A OS=Homo sapiens GN=FAM9A PE=2 SV=1                                                              |          |          |
| Q8IZX4                 | TAF1L_HUMAN Transcription initiation factor TFIID subunit 1-like OS=Homo sapiens GN=TAF1L PE=1 SV=1                       |          |          |
| Q8MH63                 | LAT1N_HUMAN Putative L-type amino acid transporter 1-like protein MLAS OS=Homo sapiens GN=SLC7A5P1 PE=5 SV=1              |          |          |
| Q8N0S6                 | CENPL_HUMAN Centromere protein L OS=Homo sapiens GN=CENPL PE=1 SV=2                                                       |          | 22.51    |
| Q8N0S6-2               | CENPL_HUMAN Isoform 2 of Centromere protein L OS=Homo sapiens GN=CENPL                                                    |          | 22.51    |

|                            |                                                                                                                           |            |        |
|----------------------------|---------------------------------------------------------------------------------------------------------------------------|------------|--------|
| Q8N0T1                     | CH059_HUMAN Uncharacterized protein C8orf59 OS=Homo sapiens GN=C8orf59 PE=1 SV=2                                          |            | 49.09  |
| Q8N0U4                     | F185A_HUMAN Protein FAM185A OS=Homo sapiens GN=FAM185A PE=2 SV=3                                                          |            |        |
| Q8N0U4-3                   | F185A_HUMAN Isoform 3 of Protein FAM185A OS=Homo sapiens GN=FAM185A                                                       |            |        |
| Q8N0U8                     | VKORL_HUMAN Vitamin K epoxide reductase complex subunit 1-like protein 1 OS=Homo sapiens GN=VKORC1L1 PE=1 SV=2            |            | 35     |
| Q8N0V4                     | LGI2_HUMAN Leucine-rich repeat LGI family member 2 OS=Homo sapiens GN=LGI2 PE=1 SV=1                                      |            | 27.98  |
| Q8N0X4;Q8N0X4-2            | CLYBL_HUMAN Citrate lyase subunit beta-like protein, mitochondrial OS=Homo sapiens GN=CLYBL PE=2 SV=2;>sp Q8N0X4-2 CLYBL  | 0.00024599 |        |
| Q8N0X7                     | SPG20_HUMAN Spartin OS=Homo sapiens GN=SPG20 PE=1 SV=1                                                                    | 2.30E-14   |        |
| Q8N0Y7                     | PGAM4_HUMAN Probable phosphoglycerate mutase 4 OS=Homo sapiens GN=PGAM4 PE=1 SV=1                                         |            | 149.71 |
| Q8N0Z2                     | ABRA_HUMAN Actin-binding Rho-activating protein OS=Homo sapiens GN=ABRA PE=2 SV=1                                         |            |        |
| Q8N122                     | RPTOR_HUMAN Regulatory-associated protein of mTOR OS=Homo sapiens GN=RPTOR PE=1 SV=1                                      | 6.93E-09   |        |
| Q8N126-2;Q8N126;Q8N127     | CADM3_HUMAN Isoform 2 of Cell adhesion molecule 3 OS=Homo sapiens GN=CADM3;>sp Q8N126 CADM3_HUMAN Cell adhesion n         | 5.04E-19   |        |
| Q8N129                     | CNPY4_HUMAN Protein canopy homolog 4 OS=Homo sapiens GN=CNPY4 PE=2 SV=1                                                   |            | 55.42  |
| Q8N131                     | PORIM_HUMAN Porimin OS=Homo sapiens GN=TMEM123 PE=1 SV=1                                                                  |            |        |
| Q8N131-2                   | PORIM_HUMAN Isoform 2 of Porimin OS=Homo sapiens GN=TMEM123                                                               |            |        |
| Q8N138                     | ORML3_HUMAN ORM1-like protein 3 OS=Homo sapiens GN=ORMDL3 PE=1 SV=1                                                       |            |        |
| Q8N138-4                   | ORML3_HUMAN Isoform 2 of ORM1-like protein 3 OS=Homo sapiens GN=ORMDL3                                                    |            |        |
| Q8N138;Q8N138-4            | ORML3_HUMAN ORM1-like protein 3 OS=Homo sapiens GN=ORMDL3 PE=1 SV=1;>sp Q8N138-4 ORML3_HUMAN Isoform 2 of ORM1-           | 1.94E-12   |        |
| Q8N140                     | EID3_HUMAN EP300-interacting inhibitor of differentiation 3 OS=Homo sapiens GN=EID3 PE=1 SV=1                             |            | 20.08  |
| Q8N163                     | K1967_HUMAN Protein KIAA1967 OS=Homo sapiens GN=KIAA1967 PE=1 SV=2                                                        |            | 403.61 |
| Q8N163-2                   | K1967_HUMAN Isoform 2 of Protein KIAA1967 OS=Homo sapiens GN=KIAA1967                                                     |            | 403.61 |
| Q8N163;Q8N163-2            | K1967_HUMAN Protein KIAA1967 OS=Homo sapiens GN=KIAA1967 PE=1 SV=2;>sp Q8N163-2 K1967_HUMAN Isoform 2 of Protein k        | 4.28E-165  |        |
| Q8N183                     | MIMIT_HUMAN Mimitin, mitochondrial OS=Homo sapiens GN=NDUFAF2 PE=1 SV=1                                                   |            | 184.66 |
| Q8N1A0                     | KT222_HUMAN Keratin-like protein KRT222 OS=Homo sapiens GN=KRT222 PE=2 SV=1                                               |            |        |
| Q8N1A0-2                   | KT222_HUMAN Isoform 2 of Keratin-like protein KRT222 OS=Homo sapiens GN=KRT222                                            |            |        |
| Q8N1B4                     | VPS52_HUMAN Vacuolar protein sorting-associated protein 52 homolog OS=Homo sapiens GN=VPS52 PE=1 SV=1                     |            | 39.05  |
| Q8N1F1                     | NC188_HUMAN Putative uncharacterized protein encoded by NCRNA00188, mitochondrial OS=Homo sapiens GN=NCRNA00188 PE=5 SV=1 |            |        |
| Q8N1F7                     | NUP93_HUMAN Nuclear pore complex protein Nup93 OS=Homo sapiens GN=NUP93 PE=1 SV=2                                         |            |        |
| Q8N1G2                     | MTR1_HUMAN Cap-specific mRNA (nucleoside-2'-O-)-methyltransferase 1 OS=Homo sapiens GN=FTSJD2 PE=1 SV=1                   |            | 126.42 |
| Q8N1G4                     | LRC47_HUMAN Leucine-rich repeat-containing protein 47 OS=Homo sapiens GN=LRRC47 PE=1 SV=1                                 |            | 164.33 |
| Q8N1N4                     | K2C78_HUMAN Keratin, type II cytoskeletal 78 OS=Homo sapiens GN=KRT78 PE=1 SV=2                                           |            | 76.32  |
| Q8N1N4-2                   | K2C78_HUMAN Isoform 2 of Keratin, type II cytoskeletal 78 OS=Homo sapiens GN=KRT78                                        |            | 76.32  |
| Q8N1Q1                     | CAH13_HUMAN Carbonic anhydrase 13 OS=Homo sapiens GN=CA13 PE=1 SV=1                                                       | 7.96E-11   |        |
| Q8N1S5;Q8N1S5-2            | S39AB_HUMAN Zinc transporter ZIP11 OS=Homo sapiens GN=SLC39A11 PE=2 SV=3;>sp Q8N1S5-2 S39AB_HUMAN Isoform 2 of Zin        | 1.51E-18   |        |
| Q8N1W1;Q8N1W1-3;Q8N1W1-4   | RGNEF_HUMAN Rho-guanine nucleotide exchange factor OS=Homo sapiens GN=RGNEF PE=1 SV=3;>sp Q8N1W1-3 RGNEF_HUMAN I          | 2.70E-10   |        |
| Q8N1Y9                     | YI025_HUMAN Putative uncharacterized protein FLJ37218 OS=Homo sapiens GN=YI025 PE=5 SV=2                                  |            | 49.84  |
| Q8N201                     | INT1_HUMAN Integrator complex subunit 1 OS=Homo sapiens GN=INTS1 PE=1 SV=2                                                |            |        |
| Q8N257                     | H2B3B_HUMAN Histone H2B type 3-B OS=Homo sapiens GN=HIST3H2BB PE=1 SV=3                                                   |            | 715.52 |
| Q8N264                     | RHG24_HUMAN Rho GTPase-activating protein 24 OS=Homo sapiens GN=ARHGAP24 PE=1 SV=2                                        |            |        |
| Q8N264-2                   | RHG24_HUMAN Isoform 2 of Rho GTPase-activating protein 24 OS=Homo sapiens GN=ARHGAP24                                     |            |        |
| Q8N264-3                   | RHG24_HUMAN Isoform 3 of Rho GTPase-activating protein 24 OS=Homo sapiens GN=ARHGAP24                                     |            |        |
| Q8N283                     | ANR35_HUMAN Ankyrin repeat domain-containing protein 35 OS=Homo sapiens GN=ANKRD35 PE=2 SV=2                              |            |        |
| Q8N2F6                     | ARM10_HUMAN Armadillo repeat-containing protein 10 OS=Homo sapiens GN=ARMC10 PE=1 SV=1                                    |            | 34.37  |
| Q8N2F6-2                   | ARM10_HUMAN Isoform 2 of Armadillo repeat-containing protein 10 OS=Homo sapiens GN=ARMC10                                 |            | 34.37  |
| Q8N2F6-2;Q8N2F6-4;Q8N2F6-3 | ARM10_HUMAN Isoform 2 of Armadillo repeat-containing protein 10 OS=Homo sapiens GN=ARMC10;>sp Q8N2F6-4 ARM10_HUMAN        | 2.43E-77   |        |
| Q8N2F6-3                   | ARM10_HUMAN Isoform 3 of Armadillo repeat-containing protein 10 OS=Homo sapiens GN=ARMC10                                 |            | 34.37  |
| Q8N2F6-4                   | ARM10_HUMAN Isoform 4 of Armadillo repeat-containing protein 10 OS=Homo sapiens GN=ARMC10                                 |            | 34.37  |
| Q8N2F6;Q8N2F6-2;Q8N2F6-3   | ARM10_HUMAN Armadillo repeat-containing protein 10 OS=Homo sapiens GN=ARMC10 PE=1 SV=1;>sp Q8N2F6-2 ARM10_HUMAN I         | 4.49E-18   |        |
| Q8N2G8                     | GHDC_HUMAN GH3 domain-containing protein OS=Homo sapiens GN=GHDC PE=1 SV=2                                                |            |        |
| Q8N2G8-2                   | GHDC_HUMAN Isoform 2 of GH3 domain-containing protein OS=Homo sapiens GN=GHDC                                             |            |        |
| Q8N2G8;B4DQS4;B3KVB0       | GHDC_HUMAN GH3 domain-containing protein OS=Homo sapiens GN=GHDC PE=1 SV=2;>tr B4DQS4 B4DQS4_HUMAN cDNA FLJ593            | 1.94E-09   |        |
| Q8N2K0                     | ABD12_HUMAN Monoacylglycerol lipase ABHD12 OS=Homo sapiens GN=ABHD12 PE=2 SV=2                                            |            | 30.6   |
| Q8N2K0-2                   | ABD12_HUMAN Isoform 2 of Monoacylglycerol lipase ABHD12 OS=Homo sapiens GN=ABHD12                                         |            | 30.6   |
| Q8N2K0-2;Q8N2K0;Q8N2K0-3   | ABD12_HUMAN Isoform 2 of Monoacylglycerol lipase ABHD12 OS=Homo sapiens GN=ABHD12;>sp Q8N2K0 ABD12_HUMAN Monoac           | 1.05E-17   |        |
| Q8N2K0-3                   | ABD12_HUMAN Isoform 3 of Monoacylglycerol lipase ABHD12 OS=Homo sapiens GN=ABHD12                                         |            | 30.6   |
| Q8N2N9                     | AN36B_HUMAN Ankyrin repeat domain-containing protein 36B OS=Homo sapiens GN=ANKRD36B PE=2 SV=4                            |            |        |
| Q8N2N9-2                   | AN36B_HUMAN Isoform 2 of Ankyrin repeat domain-containing protein 36B OS=Homo sapiens GN=ANKRD36B                         |            |        |
| Q8N2N9-3                   | AN36B_HUMAN Isoform 3 of Ankyrin repeat domain-containing protein 36B OS=Homo sapiens GN=ANKRD36B                         |            |        |
| Q8N2N9-4                   | AN36B_HUMAN Isoform 4 of Ankyrin repeat domain-containing protein 36B OS=Homo sapiens GN=ANKRD36B                         |            |        |
| Q8N2S1-3                   | LTBP4_HUMAN Isoform 3 of Latent-transforming growth factor beta-binding protein 4 OS=Homo sapiens GN=LTBP4                |            | 14.28  |
| Q8N2Y8                     | RUSC2_HUMAN Iporin OS=Homo sapiens GN=RUSC2 PE=1 SV=3                                                                     |            |        |
| Q8N335                     | GPD1L_HUMAN Glycerol-3-phosphate dehydrogenase 1-like protein OS=Homo sapiens GN=GPD1L PE=1 SV=1                          | 3.65E-115  |        |

|                      |                                                                                                                         |          |        |
|----------------------|-------------------------------------------------------------------------------------------------------------------------|----------|--------|
| Q8N357               | CB018_HUMAN Transmembrane protein C2orf18 OS=Homo sapiens GN=C2orf18 PE=1 SV=1                                          |          |        |
| Q8N371               | KDM8_HUMAN Lysine-specific demethylase 8 OS=Homo sapiens GN=JMJD5 PE=1 SV=1                                             |          | 34.7   |
| Q8N371-3             | KDM8_HUMAN Isoform 3 of Lysine-specific demethylase 8 OS=Homo sapiens GN=JMJD5                                          |          | 34.7   |
| Q8N392;Q8N392-2      | RHG18_HUMAN Rho GTPase-activating protein 18 OS=Homo sapiens GN=ARHGAP18 PE=1 SV=3;>sp Q8N392-2 RHG18_HUMAN Isof        | 2.14E-57 |        |
| Q8N394               | TMTC2_HUMAN Transmembrane and TPR repeat-containing protein 2 OS=Homo sapiens GN=TMTC2 PE=2 SV=1                        |          | 27.26  |
| Q8N398               | VW5B2_HUMAN von Willebrand factor A domain-containing protein 5B2 OS=Homo sapiens GN=VWA5B2 PE=1 SV=2                   |          |        |
| Q8N3C0               | HELC1_HUMAN Activating signal cointegrator 1 complex subunit 3 OS=Homo sapiens GN=ASCC3 PE=1 SV=3                       |          |        |
| Q8N3D4               | EH1L1_HUMAN EH domain-binding protein 1-like protein 1 OS=Homo sapiens GN=EHP1L1 PE=1 SV=2                              | 2.78E-09 |        |
| Q8N3F8               | MILK1_HUMAN MICAL-like protein 1 OS=Homo sapiens GN=MICALL1 PE=1 SV=2                                                   |          |        |
| Q8N3K9               | CMYA5_HUMAN Cardiomyopathy-associated protein 5 OS=Homo sapiens GN=CMYA5 PE=1 SV=3                                      |          |        |
| Q8N3R9               | MPP5_HUMAN MAGUK p55 subfamily member 5 OS=Homo sapiens GN=MPP5 PE=1 SV=3                                               |          |        |
| Q8N3R9-2             | MPP5_HUMAN Isoform 2 of MAGUK p55 subfamily member 5 OS=Homo sapiens GN=MPP5                                            |          |        |
| Q8N3R9;Q8N3R9-2      | MPP5_HUMAN MAGUK p55 subfamily member 5 OS=Homo sapiens GN=MPP5 PE=1 SV=3;>sp Q8N3R9-2 MPP5_HUMAN Isoform 2 of          | 3.88E-28 |        |
| Q8N3T6               | T132C_HUMAN Transmembrane protein 132C OS=Homo sapiens GN=TMEM132C PE=2 SV=3                                            |          | 23.75  |
| Q8N3U4               | STAG2_HUMAN Cohesin subunit SA-2 OS=Homo sapiens GN=STAG2 PE=1 SV=3                                                     |          | 38.71  |
| Q8N3U4-2             | STAG2_HUMAN Isoform 2 of Cohesin subunit SA-2 OS=Homo sapiens GN=STAG2                                                  |          | 38.71  |
| Q8N3U4-2;Q8N3U4      | 2 STAG2_HUMAN Isoform 2 of Cohesin subunit SA-2 OS=Homo sapiens GN=STAG2;>sp Q8N3U4 STAG2_HUMAN Cohesin subunit SA-     | 2.35E-39 |        |
| Q8N3V7               | SYNPO_HUMAN Synaptopodin OS=Homo sapiens GN=SYNPO PE=1 SV=2                                                             |          |        |
| Q8N3V7-2             | SYNPO_HUMAN Isoform 2 of Synaptopodin OS=Homo sapiens GN=SYNPO                                                          |          |        |
| Q8N3V7-3             | SYNPO_HUMAN Isoform 3 of Synaptopodin OS=Homo sapiens GN=SYNPO                                                          |          |        |
| Q8N3X1               | FNBP4_HUMAN Formin-binding protein 4 OS=Homo sapiens GN=FNBP4 PE=1 SV=3                                                 |          |        |
| Q8N3X1-2             | FNBP4_HUMAN Isoform 2 of Formin-binding protein 4 OS=Homo sapiens GN=FNBP4                                              |          |        |
| Q8N3Z3               | GTPB8_HUMAN GTP-binding protein 8 OS=Homo sapiens GN=GTPBP8 PE=2 SV=1                                                   |          |        |
| Q8N3Z3-2             | GTPB8_HUMAN Isoform 2 of GTP-binding protein 8 OS=Homo sapiens GN=GTPBP8                                                |          |        |
| Q8N414               | PGBD5_HUMAN PiggyBac transposable element-derived protein 5 OS=Homo sapiens GN=PGBD5 PE=2 SV=3                          |          |        |
| Q8N474               | SFRP1_HUMAN Secreted frizzled-related protein 1 OS=Homo sapiens GN=SFRP1 PE=1 SV=1                                      | 1.55E-19 |        |
| Q8N490-2             | PNKD_HUMAN Isoform 2 of Probable hydrolase PNKD OS=Homo sapiens GN=PNKD                                                 |          | 44.82  |
| Q8N4A0               | GALT4_HUMAN Polypeptide N-acetylgalactosaminyltransferase 4 OS=Homo sapiens GN=GALNT4 PE=1 SV=2                         |          |        |
| Q8N4C6               | NIN_HUMAN Ninein OS=Homo sapiens GN=NIN PE=1 SV=4                                                                       |          | 64.42  |
| Q8N4C6-10            | NIN_HUMAN Isoform 3 of Ninein OS=Homo sapiens GN=NIN                                                                    |          | 64.42  |
| Q8N4C6-2             | NIN_HUMAN Isoform 2 of Ninein OS=Homo sapiens GN=NIN                                                                    |          | 64.42  |
| Q8N4C6-4             | NIN_HUMAN Isoform 4 of Ninein OS=Homo sapiens GN=NIN                                                                    |          | 55.89  |
| Q8N4C6-5             | NIN_HUMAN Isoform 5 of Ninein OS=Homo sapiens GN=NIN                                                                    |          | 64.42  |
| Q8N4C6-6             | NIN_HUMAN Isoform 6 of Ninein OS=Homo sapiens GN=NIN                                                                    |          | 49.4   |
| Q8N4C6-7             | NIN_HUMAN Isoform 7 of Ninein OS=Homo sapiens GN=NIN                                                                    |          | 64.42  |
| Q8N4C6-9             | NIN_HUMAN Isoform 8 of Ninein OS=Homo sapiens GN=NIN                                                                    |          | 64.42  |
| Q8N4C8               | MINK1_HUMAN Misshapen-like kinase 1 OS=Homo sapiens GN=MINK1 PE=1 SV=2                                                  |          | 113.99 |
| Q8N4C8-2             | MINK1_HUMAN Isoform 1 of Misshapen-like kinase 1 OS=Homo sapiens GN=MINK1                                               |          | 113.99 |
| Q8N4C8-3             | MINK1_HUMAN Isoform 2 of Misshapen-like kinase 1 OS=Homo sapiens GN=MINK1                                               |          | 113.99 |
| Q8N4C8;Q8N4C8-3;Q8N4 | MINK1_HUMAN Misshapen-like kinase 1 OS=Homo sapiens GN=MINK1 PE=1 SV=2;>sp Q8N4C8-3 MINK1_HUMAN Isoform 2 of Missh      | 3.76E-14 |        |
| Q8N4H5               | TOM5_HUMAN Mitochondrial import receptor subunit TOM5 homolog OS=Homo sapiens GN=TOMM5 PE=1 SV=1                        |          |        |
| Q8N4N8               | KIF2B_HUMAN Kinesin-like protein KIF2B OS=Homo sapiens GN=KIF2B PE=1 SV=3                                               |          |        |
| Q8N4P3;Q8N4P3-2      | MESH1_HUMAN Guanosine-3,5-bis(diphosphate) 3-pyrophosphohydrolase MESH1 OS=Homo sapiens GN=HDDC3 PE=1 SV=3;>sp Q8       | 1.07E-06 |        |
| Q8N4Q1               | MIA40_HUMAN Mitochondrial intermembrane space import and assembly protein 40 OS=Homo sapiens GN=CHCHD4 PE=1 SV=1        |          | 65.05  |
| Q8N4Q1-2             | MIA40_HUMAN Isoform 2 of Mitochondrial intermembrane space import and assembly protein 40 OS=Homo sapiens GN=CHCHD4     |          | 65.05  |
| Q8N4Q1-2;Q8N4Q1      | 2 MIA40_HUMAN Isoform 2 of Mitochondrial intermembrane space import and assembly protein 40 OS=Homo sapiens GN=CHCHD4;> | 1.60E-46 |        |
| Q8N4V1               | MMGT1_HUMAN Membrane magnesium transporter 1 OS=Homo sapiens GN=MMGT1 PE=1 SV=1                                         |          | 69.38  |
| Q8N4V1-2             | MMGT1_HUMAN Isoform 2 of Membrane magnesium transporter 1 OS=Homo sapiens GN=MMGT1                                      |          | 69.38  |
| Q8N4V1-2;D3DWG7;Q8N4 | 2 MMGT1_HUMAN Isoform 2 of Membrane magnesium transporter 1 OS=Homo sapiens GN=MMGT1;>tr D3DWG7 D3DWG7_HUMAN T          | 1.62E-31 |        |
| Q8N4W9               | ZN808_HUMAN Zinc finger protein 808 OS=Homo sapiens GN=ZNF808 PE=2 SV=2                                                 |          |        |
| Q8N4W9-2             | ZN808_HUMAN Isoform 2 of Zinc finger protein 808 OS=Homo sapiens GN=ZNF808                                              |          |        |
| Q8N4X5               | AF1L2_HUMAN Actin filament-associated protein 1-like 2 OS=Homo sapiens GN=AFAP1L2 PE=1 SV=1                             |          |        |
| Q8N4X5-2             | AF1L2_HUMAN Isoform 2 of Actin filament-associated protein 1-like 2 OS=Homo sapiens GN=AFAP1L2                          |          |        |
| Q8N4X5-4             | AF1L2_HUMAN Isoform 4 of Actin filament-associated protein 1-like 2 OS=Homo sapiens GN=AFAP1L2                          |          |        |
| Q8N4X5-4;Q8N4X5;Q8N4 | 4 AF1L2_HUMAN Isoform 4 of Actin filament-associated protein 1-like 2 OS=Homo sapiens GN=AFAP1L2;>sp Q8N4X5 AF1L2_HUMAN | 7.94E-11 |        |
| Q8N511               | TM199_HUMAN Transmembrane protein 199 OS=Homo sapiens GN=TMEM199 PE=1 SV=1                                              |          |        |
| Q8N543;Q8N543-2      | OGFD1_HUMAN 2-oxoglutarate and iron-dependent oxygenase domain-containing protein 1 OS=Homo sapiens GN=OGFOD1 PE=1 SV:  | 4.77E-19 |        |
| Q8N556               | AFAP1_HUMAN Actin filament-associated protein 1 OS=Homo sapiens GN=AFAP1 PE=1 SV=2                                      |          | 115.99 |
| Q8N5C6               | SRBD1_HUMAN S1 RNA-binding domain-containing protein 1 OS=Homo sapiens GN=SRBD1 PE=1 SV=2                               |          | 61.37  |
| Q8N5C6-2             | SRBD1_HUMAN Isoform 2 of S1 RNA-binding domain-containing protein 1 OS=Homo sapiens GN=SRBD1                            |          | 2.12   |
| Q8N5K1               | CISD2_HUMAN CDGSH iron-sulfur domain-containing protein 2 OS=Homo sapiens GN=CISD2 PE=1 SV=1                            |          | 316.94 |

|                        |                                                                                                                          |           |        |
|------------------------|--------------------------------------------------------------------------------------------------------------------------|-----------|--------|
| Q8N5L8                 | CI023_HUMAN Alba-like protein C9orf23 OS=Homo sapiens GN=C9orf23 PE=1 SV=1                                               |           | 55.57  |
| Q8N5M1                 | ATPF2_HUMAN ATP synthase mitochondrial F1 complex assembly factor 2 OS=Homo sapiens GN=ATPAF2 PE=1 SV=1                  | 6.94E-09  |        |
| Q8N5M4                 | TTC9C_HUMAN Tetratricopeptide repeat protein 9C OS=Homo sapiens GN=TTC9C PE=1 SV=1                                       | 6.10E-10  |        |
| Q8N5M9                 | JAGN1_HUMAN Protein jagunal homolog 1 OS=Homo sapiens GN=JAGN1 PE=1 SV=1                                                 | 4.83E-19  |        |
| Q8N5N7                 | RM50_HUMAN 39S ribosomal protein L50, mitochondrial OS=Homo sapiens GN=MRPL50 PE=1 SV=2                                  |           | 51.13  |
| Q8N5S1                 | S2541_HUMAN Solute carrier family 25 member 41 OS=Homo sapiens GN=SLC25A41 PE=2 SV=2                                     |           | 2.02   |
| Q8N5T2                 | TBC19_HUMAN TBC1 domain family member 19 OS=Homo sapiens GN=TBC1D19 PE=1 SV=2                                            |           |        |
| Q8N5Z5                 | KCD17_HUMAN BTB/POZ domain-containing protein KCTD17 OS=Homo sapiens GN=KCTD17 PE=1 SV=3                                 |           |        |
| Q8N5Z5-2               | KCD17_HUMAN Isoform 2 of BTB/POZ domain-containing protein KCTD17 OS=Homo sapiens GN=KCTD17                              |           |        |
| Q8N655                 | CJ012_HUMAN Uncharacterized protein C10orf12 OS=Homo sapiens GN=C10orf12 PE=1 SV=1                                       |           |        |
| Q8N668                 | COMD1_HUMAN COMM domain-containing protein 1 OS=Homo sapiens GN=COMMD1 PE=1 SV=1                                         |           | 26.4   |
| Q8N684                 | CPSF7_HUMAN Cleavage and polyadenylation specificity factor subunit 7 OS=Homo sapiens GN=CPSF7 PE=1 SV=1                 |           | 209.28 |
| Q8N684-2               | CPSF7_HUMAN Isoform 2 of Cleavage and polyadenylation specificity factor subunit 7 OS=Homo sapiens GN=CPSF7              |           | 209.28 |
| Q8N684-3               | CPSF7_HUMAN Isoform 3 of Cleavage and polyadenylation specificity factor subunit 7 OS=Homo sapiens GN=CPSF7              |           | 211.62 |
| Q8N684-3;Q8N684;B4DGI3 | CPSF7_HUMAN Isoform 3 of Cleavage and polyadenylation specificity factor subunit 7 OS=Homo sapiens GN=CPSF7;>sp Q8N684 C | 9.00E-111 |        |
| Q8N693                 | ESX1_HUMAN Homeobox protein ESX1 OS=Homo sapiens GN=ESX1 PE=1 SV=3                                                       |           |        |
| Q8N6C5                 | IGSF1_HUMAN Immunoglobulin superfamily member 1 OS=Homo sapiens GN=IGSF1 PE=1 SV=3                                       |           |        |
| Q8N6C5-2               | IGSF1_HUMAN Isoform 2 of Immunoglobulin superfamily member 1 OS=Homo sapiens GN=IGSF1                                    |           |        |
| Q8N6H7                 | ARFG2_HUMAN ADP-ribosylation factor GTPase-activating protein 2 OS=Homo sapiens GN=ARFGAP2 PE=1 SV=1                     | 1.01E-07  |        |
| Q8N6L1                 | KTAP2_HUMAN Keratinocyte-associated protein 2 OS=Homo sapiens GN=KRTCAP2 PE=1 SV=1                                       |           | 47.84  |
| Q8N6M0                 | OTU6B_HUMAN OTU domain-containing protein 6B OS=Homo sapiens GN=OTUD6B PE=1 SV=1                                         |           | 89.04  |
| Q8N6P7                 | I22R1_HUMAN Interleukin-22 receptor subunit alpha-1 OS=Homo sapiens GN=IL22RA1 PE=1 SV=1                                 |           |        |
| Q8N6T3-2;Q8N6T3;Q8N6T3 | ARFG1_HUMAN Isoform 2 of ADP-ribosylation factor GTPase-activating protein 1 OS=Homo sapiens GN=ARFGAP1;>sp Q8N6T3 ARF   | 4.77E-44  |        |
| Q8N6W0                 | CELF5_HUMAN CUGBP Elav-like family member 5 OS=Homo sapiens GN=CELF5 PE=1 SV=1                                           |           |        |
| Q8N6W0-2               | CELF5_HUMAN Isoform 2 of CUGBP Elav-like family member 5 OS=Homo sapiens GN=CELF5                                        |           |        |
| Q8N720                 | ZNF655_HUMAN Zinc finger protein 655 OS=Homo sapiens GN=ZNF655 PE=1 SV=3                                                 |           |        |
| Q8N720-3               | ZNF655_HUMAN Isoform 3 of Zinc finger protein 655 OS=Homo sapiens GN=ZNF655                                              |           |        |
| Q8N729                 | NPW_HUMAN Neuropeptide W OS=Homo sapiens GN=NPW PE=1 SV=2                                                                |           |        |
| Q8N743                 | KI3L3_HUMAN Killer cell immunoglobulin-like receptor 3DL3 OS=Homo sapiens GN=KIR3DL3 PE=2 SV=2                           |           |        |
| Q8N752                 | KC1AL_HUMAN Casein kinase I isoform alpha-like OS=Homo sapiens GN=CSNK1A1L PE=2 SV=2                                     |           | 27.88  |
| Q8N766                 | K0090_HUMAN Uncharacterized protein KIAA0090 OS=Homo sapiens GN=KIAA0090 PE=1 SV=1                                       |           | 164.84 |
| Q8N766-2               | K0090_HUMAN Isoform 2 of Uncharacterized protein KIAA0090 OS=Homo sapiens GN=KIAA0090                                    |           | 164.84 |
| Q8N766-3               | K0090_HUMAN Isoform 3 of Uncharacterized protein KIAA0090 OS=Homo sapiens GN=KIAA0090                                    |           | 164.84 |
| Q8N766-4               | K0090_HUMAN Isoform 4 of Uncharacterized protein KIAA0090 OS=Homo sapiens GN=KIAA0090                                    |           | 164.84 |
| Q8N766;Q8N766-2;Q8N766 | K0090_HUMAN Uncharacterized protein KIAA0090 OS=Homo sapiens GN=KIAA0090 PE=1 SV=1;>sp Q8N766-2 K0090_HUMAN Isofo        | 2.61E-31  |        |
| Q8N7H5                 | PAF1_HUMAN RNA polymerase II-associated factor 1 homolog OS=Homo sapiens GN=PAF1 PE=1 SV=2                               |           | 34.95  |
| Q8N7H5-2               | PAF1_HUMAN Isoform 2 of RNA polymerase II-associated factor 1 homolog OS=Homo sapiens GN=PAF1                            |           | 30.76  |
| Q8N7H5-2;Q8N7H5        | 2 PAF1_HUMAN Isoform 2 of RNA polymerase II-associated factor 1 homolog OS=Homo sapiens GN=PAF1;>sp Q8N7H5 PAF1_HUMAN    | 1.90E-09  |        |
| Q8N7H5;Q8N7H5-2        | PAF1_HUMAN RNA polymerase II-associated factor 1 homolog OS=Homo sapiens GN=PAF1 PE=1 SV=2;>sp Q8N7H5-2 PAF1_HUMAN       | 1.27E-12  |        |
| Q8N7X0                 | CAN7L_HUMAN Calpain-7-like protein OS=Homo sapiens GN=C6orf103 PE=2 SV=3                                                 |           |        |
| Q8N7X0-2               | CAN7L_HUMAN Isoform 2 of Calpain-7-like protein OS=Homo sapiens GN=C6orf103                                              |           |        |
| Q8N7X1                 | RMXL3_HUMAN RNA-binding motif protein, X-linked-like-3 OS=Homo sapiens GN=RBMXL3 PE=2 SV=2                               |           | 74.34  |
| Q8N7Z5                 | ANR31_HUMAN Ankyrin repeat domain-containing protein 31 OS=Homo sapiens GN=ANKRD31 PE=5 SV=2                             |           |        |
| Q8N806                 | UBR7_HUMAN Putative E3 ubiquitin-protein ligase UBR7 OS=Homo sapiens GN=UBR7 PE=1 SV=2                                   | 1.22E-11  |        |
| Q8N823                 | ZNF611_HUMAN Zinc finger protein 611 OS=Homo sapiens GN=ZNF611 PE=2 SV=2                                                 |           |        |
| Q8N823-2               | ZNF611_HUMAN Isoform 2 of Zinc finger protein 611 OS=Homo sapiens GN=ZNF611                                              |           |        |
| Q8N884                 | M21D1_HUMAN Protein MB21D1 OS=Homo sapiens GN=MB21D1 PE=1 SV=2                                                           |           |        |
| Q8N884-2               | M21D1_HUMAN Isoform 2 of Protein MB21D1 OS=Homo sapiens GN=MB21D1                                                        |           |        |
| Q8N8J0                 | PI4P1_HUMAN Putative phosphatidylinositol 4-kinase alpha-like protein P1 OS=Homo sapiens GN=PI4KAP1 PE=5 SV=1            |           |        |
| Q8N8L2                 | ZNF491_HUMAN Zinc finger protein 491 OS=Homo sapiens GN=ZNF491 PE=2 SV=1                                                 |           |        |
| Q8N8N7;Q8N8N7-2        | PTGR2_HUMAN Prostaglandin reductase 2 OS=Homo sapiens GN=PTGR2 PE=1 SV=1;>sp Q8N8N7-2 PTGR2_HUMAN Isoform 2 of Pro       | 1.87E-25  |        |
| Q8N8S7;Q8N8S7-2        | ENAH_HUMAN Protein enabled homolog OS=Homo sapiens GN=ENAH PE=1 SV=2;>sp Q8N8S7-2 ENAH_HUMAN Isoform 2 of Protein        | 1.92E-87  |        |
| Q8N8V2                 | GBP7_HUMAN Guanylate-binding protein 7 OS=Homo sapiens GN=GBP7 PE=2 SV=2                                                 |           | 24.21  |
| Q8N907                 | DAND5_HUMAN DAN domain family member 5 OS=Homo sapiens GN=DAND5 PE=2 SV=1                                                |           |        |
| Q8N954                 | CCD75_HUMAN Coiled-coil domain-containing protein 75 OS=Homo sapiens GN=CCDC75 PE=1 SV=3                                 |           |        |
| Q8N954-2               | CCD75_HUMAN Isoform 2 of Coiled-coil domain-containing protein 75 OS=Homo sapiens GN=CCDC75                              |           |        |
| Q8N954;Q8N954-2        | CCD75_HUMAN Coiled-coil domain-containing protein 75 OS=Homo sapiens GN=CCDC75 PE=1 SV=3;>sp Q8N954-2 CCD75_HUMAN        | 8.76E-12  |        |
| Q8N983                 | RM43_HUMAN 39S ribosomal protein L43, mitochondrial OS=Homo sapiens GN=MRPL43 PE=1 SV=1                                  |           | 149.05 |
| Q8N983-2               | RM43_HUMAN Isoform 2 of 39S ribosomal protein L43, mitochondrial OS=Homo sapiens GN=MRPL43                               |           | 149.05 |
| Q8N983-3               | RM43_HUMAN Isoform 3 of 39S ribosomal protein L43, mitochondrial OS=Homo sapiens GN=MRPL43                               |           | 149.05 |
| Q8N983-4               | RM43_HUMAN Isoform 4 of 39S ribosomal protein L43, mitochondrial OS=Homo sapiens GN=MRPL43                               |           | 149.05 |

|                        |                                                                                                                       |          |        |
|------------------------|-----------------------------------------------------------------------------------------------------------------------|----------|--------|
| Q8N983-4;Q8N983;Q8N984 | RM43_HUMAN Isoform 4 of 39S ribosomal protein L43, mitochondrial OS=Homo sapiens GN=MRPL43;>sp Q8N983 RM43_HUMAN 3    | 5.15E-33 |        |
| Q8N999                 | CL029_HUMAN Uncharacterized protein C12orf29 OS=Homo sapiens GN=C12orf29 PE=1 SV=2                                    |          | 35.31  |
| Q8N999-2               | CL029_HUMAN Isoform 2 of Uncharacterized protein C12orf29 OS=Homo sapiens GN=C12orf29                                 |          |        |
| Q8N999-3               | CL029_HUMAN Isoform 3 of Uncharacterized protein C12orf29 OS=Homo sapiens GN=C12orf29                                 |          | 35.31  |
| Q8N999;Q8N999-3        | CL029_HUMAN Uncharacterized protein C12orf29 OS=Homo sapiens GN=C12orf29 PE=1 SV=2;>sp Q8N999-3 CL029_HUMAN Isoform   | 5.26E-09 |        |
| Q8N9B4                 | ANR42_HUMAN Ankyrin repeat domain-containing protein 42 OS=Homo sapiens GN=ANKRD42 PE=2 SV=2                          |          |        |
| Q8N9B4-2               | ANR42_HUMAN Isoform 2 of Ankyrin repeat domain-containing protein 42 OS=Homo sapiens GN=ANKRD42                       |          |        |
| Q8N9C0                 | IGS22_HUMAN Immunoglobulin superfamily member 22 OS=Homo sapiens GN=IGSF22 PE=1 SV=2                                  |          |        |
| Q8N9F7;Q8N9F7-2;Q8N9F  | GDPD1_HUMAN Glycerophosphodiester phosphodiesterase domain-containing protein 1 OS=Homo sapiens GN=GDPD1 PE=1 SV=2;>s | 1.87E-07 |        |
| Q8N9I0                 | SYT2_HUMAN Synaptotagmin-2 OS=Homo sapiens GN=SYT2 PE=1 SV=2                                                          |          | 17.45  |
| Q8N9L1                 | ZIC4_HUMAN Zinc finger protein ZIC 4 OS=Homo sapiens GN=ZIC4 PE=1 SV=3                                                |          | 7.49   |
| Q8N9L1-2               | ZIC4_HUMAN Isoform 2 of Zinc finger protein ZIC 4 OS=Homo sapiens GN=ZIC4                                             |          | 7.49   |
| Q8N9N7                 | LRC57_HUMAN Leucine-rich repeat-containing protein 57 OS=Homo sapiens GN=LRR57 PE=1 SV=1                              |          | 47.35  |
| Q8N9N8                 | EIF1A_HUMAN Probable RNA-binding protein EIF1AD OS=Homo sapiens GN=EIF1AD PE=1 SV=1                                   | 1.12E-11 |        |
| Q8N9T8                 | KRI1_HUMAN Protein KRI1 homolog OS=Homo sapiens GN=KRI1 PE=1 SV=2                                                     |          | 100.46 |
| Q8N9T8-2               | KRI1_HUMAN Isoform 2 of Protein KRI1 homolog OS=Homo sapiens GN=KRI1                                                  |          | 100.46 |
| Q8N9T8;Q8N9T8-2        | KRI1_HUMAN Protein KRI1 homolog OS=Homo sapiens GN=KRI1 PE=1 SV=2;>sp Q8N9T8-2 KRI1_HUMAN Isoform 2 of Protein KRI1   | 3.47E-56 |        |
| Q8N9V6                 | ANR53_HUMAN Ankyrin repeat domain-containing protein 53 OS=Homo sapiens GN=ANKRD53 PE=2 SV=2                          |          |        |
| Q8N9V6-2               | ANR53_HUMAN Isoform 2 of Ankyrin repeat domain-containing protein 53 OS=Homo sapiens GN=ANKRD53                       |          |        |
| Q8N9Z9                 | ILFT1_HUMAN Intermediate filament tail domain-containing protein 1 OS=Homo sapiens GN=IFLTD1 PE=2 SV=2                |          | 36.7   |
| Q8N9Z9-2               | ILFT1_HUMAN Isoform 2 of Intermediate filament tail domain-containing protein 1 OS=Homo sapiens GN=IFLTD1             |          |        |
| Q8N9Z9-3               | ILFT1_HUMAN Isoform 3 of Intermediate filament tail domain-containing protein 1 OS=Homo sapiens GN=IFLTD1             |          |        |
| Q8N9Z9-4               | ILFT1_HUMAN Isoform 4 of Intermediate filament tail domain-containing protein 1 OS=Homo sapiens GN=IFLTD1             |          | 36.7   |
| Q8N9Z9-5               | ILFT1_HUMAN Isoform 5 of Intermediate filament tail domain-containing protein 1 OS=Homo sapiens GN=IFLTD1             |          | 36.7   |
| Q8NA42                 | ZN383_HUMAN Zinc finger protein 383 OS=Homo sapiens GN=ZNF383 PE=2 SV=1                                               |          |        |
| Q8NAC3                 | I17RC_HUMAN Interleukin-17 receptor C OS=Homo sapiens GN=IL17RC PE=1 SV=2                                             |          |        |
| Q8NAC3-2               | I17RC_HUMAN Isoform 2 of Interleukin-17 receptor C OS=Homo sapiens GN=IL17RC                                          |          |        |
| Q8NAC3-3               | I17RC_HUMAN Isoform 3 of Interleukin-17 receptor C OS=Homo sapiens GN=IL17RC                                          |          |        |
| Q8NAC3-4               | I17RC_HUMAN Isoform 4 of Interleukin-17 receptor C OS=Homo sapiens GN=IL17RC                                          |          |        |
| Q8NAF0                 | ZN579_HUMAN Zinc finger protein 579 OS=Homo sapiens GN=ZNF579 PE=1 SV=2                                               |          |        |
| Q8NAP1                 | GATS_HUMAN Putative protein GATS OS=Homo sapiens GN=GATS PE=5 SV=1                                                    |          |        |
| Q8NAP3                 | ZBT38_HUMAN Zinc finger and BTB domain-containing protein 38 OS=Homo sapiens GN=ZBTB38 PE=1 SV=2                      |          |        |
| Q8NAT2                 | TDRD5_HUMAN Tudor domain-containing protein 5 OS=Homo sapiens GN=TDRD5 PE=1 SV=3                                      |          | 58.52  |
| Q8NAT2-1               | TDRD5_HUMAN Isoform 1 of Tudor domain-containing protein 5 OS=Homo sapiens GN=TDRD5                                   |          | 58.52  |
| Q8NAV1                 | PR38A_HUMAN Pre-splicing factor 38A OS=Homo sapiens GN=PRPF38A PE=1 SV=1                                              |          | 44.67  |
| Q8NB15                 | ZN511_HUMAN Zinc finger protein 511 OS=Homo sapiens GN=ZNF511 PE=2 SV=1                                               |          | 50.02  |
| Q8NB15-2               | ZN511_HUMAN Isoform 2 of Zinc finger protein 511 OS=Homo sapiens GN=ZNF511                                            |          | 50.02  |
| Q8NB15;Q8NB15-2        | ZN511_HUMAN Zinc finger protein 511 OS=Homo sapiens GN=ZNF511 PE=2 SV=1;>sp Q8NB15-2 ZN511_HUMAN Isoform 2 of Zinc f  | 4.36E-15 |        |
| Q8NB16                 | MLKL_HUMAN Mixed lineage kinase domain-like protein OS=Homo sapiens GN=MLKL PE=1 SV=1                                 |          |        |
| Q8NB16-2               | MLKL_HUMAN Isoform 2 of Mixed lineage kinase domain-like protein OS=Homo sapiens GN=MLKL                              |          |        |
| Q8NB37                 | PDDC1_HUMAN Parkinson disease 7 domain-containing protein 1 OS=Homo sapiens GN=PDDC1 PE=1 SV=1                        |          | 22.89  |
| Q8NB37-2               | PDDC1_HUMAN Isoform 2 of Parkinson disease 7 domain-containing protein 1 OS=Homo sapiens GN=PDDC1                     |          | 33.04  |
| Q8NB37-2;Q8NB37;B7ZK1  | PDDC1_HUMAN Isoform 2 of Parkinson disease 7 domain-containing protein 1 OS=Homo sapiens GN=PDDC1;>sp Q8NB37 PDDC1_   | 3.65E-06 |        |
| Q8NB37-3               | PDDC1_HUMAN Isoform 3 of Parkinson disease 7 domain-containing protein 1 OS=Homo sapiens GN=PDDC1                     |          | 22.89  |
| Q8NB90                 | SPAT5_HUMAN Spermatogenesis-associated protein 5 OS=Homo sapiens GN=SPATA5 PE=1 SV=3                                  |          | 32.04  |
| Q8NB90-2               | SPAT5_HUMAN Isoform 2 of Spermatogenesis-associated protein 5 OS=Homo sapiens GN=SPATA5                               |          | 32.04  |
| Q8NB90-3               | SPAT5_HUMAN Isoform 3 of Spermatogenesis-associated protein 5 OS=Homo sapiens GN=SPATA5                               |          | 32.04  |
| Q8NB90;C9JT97;Q8NB90-  | SPAT5_HUMAN Spermatogenesis-associated protein 5 OS=Homo sapiens GN=SPATA5 PE=1 SV=3;>tr C9JT97 C9JT97_HUMAN Unchar   | 6.53E-11 |        |
| Q8NBD8                 | T229B_HUMAN Transmembrane protein 229B OS=Homo sapiens GN=TMEM229B PE=2 SV=1                                          |          |        |
| Q8NBE8                 | KLH23_HUMAN Kelch-like protein 23 OS=Homo sapiens GN=KLHL23 PE=2 SV=1                                                 |          |        |
| Q8NBF1                 | GLIS1_HUMAN Zinc finger protein GLIS1 OS=Homo sapiens GN=GLIS1 PE=2 SV=2                                              |          |        |
| Q8NBF2                 | NHLC2_HUMAN NHL repeat-containing protein 2 OS=Homo sapiens GN=NHLRC2 PE=1 SV=1                                       |          |        |
| Q8NBF2-2               | NHLC2_HUMAN Isoform 2 of NHL repeat-containing protein 2 OS=Homo sapiens GN=NHLRC2                                    |          |        |
| Q8NBF2;Q8NBF2-2        | NHLC2_HUMAN NHL repeat-containing protein 2 OS=Homo sapiens GN=NHLRC2 PE=1 SV=1;>sp Q8NBF2-2 NHLC2_HUMAN Isoform      | 1.74E-18 |        |
| Q8NBF6                 | AVL9_HUMAN Late secretory pathway protein AVL9 homolog OS=Homo sapiens GN=AVL9 PE=1 SV=1                              |          | 32.61  |
| Q8NBF6-2               | AVL9_HUMAN Isoform 2 of Late secretory pathway protein AVL9 homolog OS=Homo sapiens GN=AVL9                           |          | 32.61  |
| Q8NB15                 | S43A3_HUMAN Solute carrier family 43 member 3 OS=Homo sapiens GN=SLC43A3 PE=1 SV=2                                    |          | 109.25 |
| Q8NB15;Q8NB15-2        | GOLM1_HUMAN Golgi membrane protein 1 OS=Homo sapiens GN=GOLM1 PE=1 SV=1;>sp Q8NB15-2 GOLM1_HUMAN Isoform 2 of G       | 1.26E-06 |        |
| Q8NB15                 | GT251_HUMAN Procollagen galactosyltransferase 1 OS=Homo sapiens GN=GLT25D1 PE=1 SV=1                                  |          | 666.63 |
| Q8NB17                 | SUMF2_HUMAN Sulfatase-modifying factor 2 OS=Homo sapiens GN=SUMF2 PE=1 SV=2                                           |          | 295.59 |
| Q8NB17-2               | SUMF2_HUMAN Isoform 2 of Sulfatase-modifying factor 2 OS=Homo sapiens GN=SUMF2                                        |          | 219.81 |



|                          |                                                                                                                                                                                                                            |          |         |
|--------------------------|----------------------------------------------------------------------------------------------------------------------------------------------------------------------------------------------------------------------------|----------|---------|
| Q8NBJ7-3                 | SUMF2_HUMAN Isoform 3 of Sulfatase-modifying factor 2 OS=Homo sapiens GN=SUMF2                                                                                                                                             |          | 215.26  |
| Q8NBJ7-4                 | SUMF2_HUMAN Isoform 4 of Sulfatase-modifying factor 2 OS=Homo sapiens GN=SUMF2                                                                                                                                             |          | 75.78   |
| Q8NBJ7-5                 | SUMF2_HUMAN Isoform 5 of Sulfatase-modifying factor 2 OS=Homo sapiens GN=SUMF2                                                                                                                                             |          | 156.11  |
| Q8NBJ7;Q8NBJ7-3;Q8NBJ7-4 | SUMF2_HUMAN Sulfatase-modifying factor 2 OS=Homo sapiens GN=SUMF2 PE=1 SV=2;>sp Q8NBJ7-3 SUMF2_HUMAN Isoform 3 of Sulfatase-modifying factor 2 OS=Homo sapiens GN=SUMF2                                                    | 1.51E-23 |         |
| Q8NBL1                   | PGLT1_HUMAN Protein O-glycosyltransferase 1 OS=Homo sapiens GN=POGLUT1 PE=1 SV=1                                                                                                                                           |          |         |
| Q8NBL1;B4DJ97            | KTEL1_HUMAN KTEL motif-containing protein 1 OS=Homo sapiens GN=KTELC1 PE=1 SV=1;>tr B4DJ97 B4DJ97_HUMAN cDNA FLJ53027.1                                                                                                    | 6.95E-05 |         |
| Q8NBM8                   | PCYXL_HUMAN Prenylcysteine oxidase-like OS=Homo sapiens GN=PCYOX1L PE=1 SV=2                                                                                                                                               |          |         |
| Q8NBN7;B2RDH1;Q8NBN7-1   | RDH13_HUMAN Retinol dehydrogenase 13 OS=Homo sapiens GN=RDH13 PE=1 SV=2;>tr B2RDH1 B2RDH1_HUMAN cDNA, FLJ96605.1                                                                                                           | 6.00E-10 |         |
| Q8NBP0                   | TTC13_HUMAN Tetratricopeptide repeat protein 13 OS=Homo sapiens GN=TTC13 PE=2 SV=3                                                                                                                                         |          |         |
| Q8NBP0-2                 | TTC13_HUMAN Isoform 2 of Tetratricopeptide repeat protein 13 OS=Homo sapiens GN=TTC13                                                                                                                                      |          |         |
| Q8NBP7                   | PCSK9_HUMAN Proprotein convertase subtilisin/kexin type 9 OS=Homo sapiens GN=PCSK9 PE=1 SV=3                                                                                                                               |          |         |
| Q8NBP7-2                 | PCSK9_HUMAN Isoform 2 of Proprotein convertase subtilisin/kexin type 9 OS=Homo sapiens GN=PCSK9                                                                                                                            |          |         |
| Q8NBQ5                   | DHB11_HUMAN Estradiol 17-beta-dehydrogenase 11 OS=Homo sapiens GN=HSD17B11 PE=1 SV=3                                                                                                                                       |          | 345.91  |
| Q8NBR6                   | FA63B_HUMAN Protein FAM63B OS=Homo sapiens GN=FAM63B PE=1 SV=2                                                                                                                                                             |          | 28.28   |
| Q8NBR6-2                 | FA63B_HUMAN Isoform 2 of Protein FAM63B OS=Homo sapiens GN=FAM63B                                                                                                                                                          |          | 28.28   |
| Q8NBS9                   | TXND5_HUMAN Thioredoxin domain-containing protein 5 OS=Homo sapiens GN=TXNDC5 PE=1 SV=2                                                                                                                                    |          | 751.91  |
| Q8NBT2                   | SPC24_HUMAN Kinetochole protein Spc24 OS=Homo sapiens GN=SPC24 PE=1 SV=1                                                                                                                                                   | 5.88E-98 |         |
| Q8NBU5                   | ATAD1_HUMAN ATPase family AAA domain-containing protein 1 OS=Homo sapiens GN=ATAD1 PE=1 SV=1                                                                                                                               |          | 76.25   |
| Q8NBU5-2                 | ATAD1_HUMAN Isoform 2 of ATPase family AAA domain-containing protein 1 OS=Homo sapiens GN=ATAD1                                                                                                                            |          | 76.25   |
| Q8NBU5;Q8NBU5-2          | ATAD1_HUMAN ATPase family AAA domain-containing protein 1 OS=Homo sapiens GN=ATAD1 PE=1 SV=1;>sp Q8NBU5-2 ATAD1_HUMAN Isoform 2 of ATPase family AAA domain-containing protein 1 OS=Homo sapiens GN=ATAD1                  | 1.07E-10 |         |
| Q8NBX0                   | SCPDH_HUMAN Probable saccharopine dehydrogenase OS=Homo sapiens GN=SCCPDH PE=1 SV=1                                                                                                                                        |          | 39.01   |
| Q8NBZ7-2;Q8NBZ7;Q8NBZ7-1 | UXS1_HUMAN Isoform 2 of UDP-glucuronic acid decarboxylase 1 OS=Homo sapiens GN=UXS1;>sp Q8NBZ7 UXS1_HUMAN UDP-glucuronic acid decarboxylase 1 OS=Homo sapiens GN=UXS1                                                      | 3.86E-24 |         |
| Q8NC42                   | RN149_HUMAN E3 ubiquitin-protein ligase RNF149 OS=Homo sapiens GN=RNF149 PE=2 SV=2                                                                                                                                         |          |         |
| Q8NC51                   | PAIRB_HUMAN Plasminogen activator inhibitor 1 RNA-binding protein OS=Homo sapiens GN=SERBP1 PE=1 SV=2                                                                                                                      |          | 1077.31 |
| Q8NC51-2                 | PAIRB_HUMAN Isoform 2 of Plasminogen activator inhibitor 1 RNA-binding protein OS=Homo sapiens GN=SERBP1                                                                                                                   |          | 1041.65 |
| Q8NC51-3                 | PAIRB_HUMAN Isoform 3 of Plasminogen activator inhibitor 1 RNA-binding protein OS=Homo sapiens GN=SERBP1                                                                                                                   |          | 1077.31 |
| Q8NC51-4                 | PAIRB_HUMAN Isoform 4 of Plasminogen activator inhibitor 1 RNA-binding protein OS=Homo sapiens GN=SERBP1                                                                                                                   |          | 1041.65 |
| Q8NC51;D3DQ70;Q8NC51-1   | PAIRB_HUMAN Plasminogen activator inhibitor 1 RNA-binding protein OS=Homo sapiens GN=SERBP1 PE=1 SV=2;>tr D3DQ70 D3DQ70_HUMAN Isoform 1 of Plasminogen activator inhibitor 1 RNA-binding protein OS=Homo sapiens GN=SERBP1 | 0        |         |
| Q8NC56                   | LEMD2_HUMAN LEM domain-containing protein 2 OS=Homo sapiens GN=LEMD2 PE=1 SV=1                                                                                                                                             |          |         |
| Q8NC60                   | CD014_HUMAN Uncharacterized protein C4orf14 OS=Homo sapiens GN=C4orf14 PE=1 SV=2                                                                                                                                           | 1.31E-21 |         |
| Q8NCA5                   | FA98A_HUMAN Protein FAM98A OS=Homo sapiens GN=FAM98A PE=1 SV=1                                                                                                                                                             |          | 119.12  |
| Q8NCA5-2                 | FA98A_HUMAN Isoform 2 of Protein FAM98A OS=Homo sapiens GN=FAM98A                                                                                                                                                          |          | 119.12  |
| Q8NCA5;Q8NCA5-2          | FA98A_HUMAN Protein FAM98A OS=Homo sapiens GN=FAM98A PE=1 SV=1;>sp Q8NCA5-2 FA98A_HUMAN Isoform 2 of Protein FAM98A OS=Homo sapiens GN=FAM98A                                                                              | 5.38E-11 |         |
| Q8NCD3                   | HJURP_HUMAN Holliday junction recognition protein OS=Homo sapiens GN=HJURP PE=1 SV=2                                                                                                                                       |          |         |
| Q8NCD3-2                 | HJURP_HUMAN Isoform 2 of Holliday junction recognition protein OS=Homo sapiens GN=HJURP                                                                                                                                    |          |         |
| Q8NCD3-3                 | HJURP_HUMAN Isoform 3 of Holliday junction recognition protein OS=Homo sapiens GN=HJURP                                                                                                                                    |          |         |
| Q8NCG7                   | DGLB_HUMAN Sn1-specific diacylglycerol lipase beta OS=Homo sapiens GN=DAGLB PE=1 SV=2                                                                                                                                      |          | 23.1    |
| Q8NCG7-2                 | DGLB_HUMAN Isoform 2 of Sn1-specific diacylglycerol lipase beta OS=Homo sapiens GN=DAGLB                                                                                                                                   |          | 2.73    |
| Q8NCG7-3                 | DGLB_HUMAN Isoform 3 of Sn1-specific diacylglycerol lipase beta OS=Homo sapiens GN=DAGLB                                                                                                                                   |          | 20.37   |
| Q8NCG7;Q8NCG7-2          | DGLB_HUMAN Sn1-specific diacylglycerol lipase beta OS=Homo sapiens GN=DAGLB PE=1 SV=2;>sp Q8NCG7-2 DGLB_HUMAN Isoform 2 of Sn1-specific diacylglycerol lipase beta OS=Homo sapiens GN=DAGLB                                | 5.25E-16 |         |
| Q8NCJ5                   | SPRY3_HUMAN SPRY domain-containing protein 3 OS=Homo sapiens GN=SPRY3 PE=1 SV=2                                                                                                                                            |          | 26.32   |
| Q8NCL4                   | GALT6_HUMAN Polypeptide N-acetylgalactosaminyltransferase 6 OS=Homo sapiens GN=GALNT6 PE=2 SV=2                                                                                                                            | 5.38E-45 |         |
| Q8NCM8-2;B0I1S0;Q8NCM8-1 | DYHC2_HUMAN Isoform 2 of Cytoplasmic dynein 2 heavy chain 1 OS=Homo sapiens GN=DYNC2H1;>tr B0I1S0 B0I1S0_HUMAN DYHC2 OS=Homo sapiens GN=DYHC2                                                                              | 2.09E-06 |         |
| Q8NCN5                   | PDPR_HUMAN Pyruvate dehydrogenase phosphatase regulatory subunit, mitochondrial OS=Homo sapiens GN=PDPR PE=1 SV=2                                                                                                          | 3.10E-09 |         |
| Q8NCW5;Q8NCW5-2          | AIBP_HUMAN Apolipoprotein A-I-binding protein OS=Homo sapiens GN=APOA1BP PE=1 SV=2;>sp Q8NCW5-2 AIBP_HUMAN Isoform 2 of Apolipoprotein A-I-binding protein OS=Homo sapiens GN=APOA1BP                                      | 9.27E-28 |         |
| Q8NCX0                   | CC150_HUMAN Coiled-coil domain-containing protein 150 OS=Homo sapiens GN=CCDC150 PE=2 SV=2                                                                                                                                 |          | 63.17   |
| Q8NCX0-2                 | CC150_HUMAN Isoform 2 of Coiled-coil domain-containing protein 150 OS=Homo sapiens GN=CCDC150                                                                                                                              |          | 22.26   |
| Q8NCX0-3                 | CC150_HUMAN Isoform 3 of Coiled-coil domain-containing protein 150 OS=Homo sapiens GN=CCDC150                                                                                                                              |          | 15.16   |
| Q8NCX0-4                 | CC150_HUMAN Isoform 4 of Coiled-coil domain-containing protein 150 OS=Homo sapiens GN=CCDC150                                                                                                                              |          | 5.8     |
| Q8ND04-2;Q8ND04;Q8ND04-1 | SMG8_HUMAN Isoform 2 of Protein SMG8 OS=Homo sapiens GN=SMG8;>sp Q8ND04 SMG8_HUMAN Protein SMG8 OS=Homo sapiens GN=SMG8                                                                                                    | 7.92E-09 |         |
| Q8ND07                   | CN045_HUMAN Uncharacterized protein C14orf45 OS=Homo sapiens GN=C14orf45 PE=1 SV=3                                                                                                                                         | 9.05E-05 |         |
| Q8ND24                   | RN214_HUMAN RING finger protein 214 OS=Homo sapiens GN=RNF214 PE=1 SV=2                                                                                                                                                    | 1.24E-20 |         |
| Q8ND30                   | LIPB2_HUMAN Liprin-beta-2 OS=Homo sapiens GN=PPFIBP2 PE=2 SV=3                                                                                                                                                             | 6.42E-51 |         |
| Q8ND56                   | LS14A_HUMAN Protein LSM14 homolog A OS=Homo sapiens GN=LSM14A PE=1 SV=3                                                                                                                                                    |          | 28.61   |
| Q8ND56-2                 | LS14A_HUMAN Isoform 2 of Protein LSM14 homolog A OS=Homo sapiens GN=LSM14A                                                                                                                                                 |          | 28.61   |
| Q8ND76                   | CCNY_HUMAN Cyclin-Y OS=Homo sapiens GN=CCNY PE=1 SV=2                                                                                                                                                                      |          | 38.16   |
| Q8ND76-2                 | CCNY_HUMAN Isoform 2 of Cyclin-Y OS=Homo sapiens GN=CCNY                                                                                                                                                                   |          | 38.42   |
| Q8ND76-3                 | CCNY_HUMAN Isoform 3 of Cyclin-Y OS=Homo sapiens GN=CCNY                                                                                                                                                                   |          | 38.16   |
| Q8NDA8                   | HTR7A_HUMAN HEAT repeat-containing protein 7A OS=Homo sapiens GN=HEATR7A PE=1 SV=3                                                                                                                                         |          | 36.11   |
| Q8NDA8-2                 | HTR7A_HUMAN Isoform 2 of HEAT repeat-containing protein 7A OS=Homo sapiens GN=HEATR7A                                                                                                                                      |          | 28.07   |
| Q8NDA8-3                 | HTR7A_HUMAN Isoform 3 of HEAT repeat-containing protein 7A OS=Homo sapiens GN=HEATR7A                                                                                                                                      |          | 8.04    |

|                          |                                                                                                                                                                                                               |           |       |
|--------------------------|---------------------------------------------------------------------------------------------------------------------------------------------------------------------------------------------------------------|-----------|-------|
| Q8NDA8-7                 | HTR7A_HUMAN Isoform 7 of HEAT repeat-containing protein 7A OS=Homo sapiens GN=HEATR7A                                                                                                                         |           | 24.63 |
| Q8NDB2                   | BANK1_HUMAN B-cell scaffold protein with ankyrin repeats OS=Homo sapiens GN=BANK1 PE=1 SV=3                                                                                                                   |           |       |
| Q8NDB2-2                 | BANK1_HUMAN Isoform 2 of B-cell scaffold protein with ankyrin repeats OS=Homo sapiens GN=BANK1                                                                                                                |           |       |
| Q8NDB2-3                 | BANK1_HUMAN Isoform 3 of B-cell scaffold protein with ankyrin repeats OS=Homo sapiens GN=BANK1                                                                                                                |           |       |
| Q8NDB2-4                 | BANK1_HUMAN Isoform 4 of B-cell scaffold protein with ankyrin repeats OS=Homo sapiens GN=BANK1                                                                                                                |           |       |
| Q8NDC0                   | MISSL_HUMAN MAPK-interacting and spindle-stabilizing protein-like OS=Homo sapiens GN=MAPK1IP1L PE=1 SV=4                                                                                                      | 3.13E-45  |       |
| Q8NDH2                   | CM040_HUMAN Uncharacterized protein C13orf40 OS=Homo sapiens GN=C13orf40 PE=2 SV=2                                                                                                                            |           |       |
| Q8NDH3                   | PEPL1_HUMAN Probable aminopeptidase NPEPL1 OS=Homo sapiens GN=NPEPL1 PE=1 SV=3                                                                                                                                |           | 20.3  |
| Q8NDH3-2                 | PEPL1_HUMAN Isoform 2 of Probable aminopeptidase NPEPL1 OS=Homo sapiens GN=NPEPL1                                                                                                                             |           | 20.3  |
| Q8NDH3-3                 | PEPL1_HUMAN Isoform 3 of Probable aminopeptidase NPEPL1 OS=Homo sapiens GN=NPEPL1                                                                                                                             |           |       |
| Q8NDH3;Q8NDH3-2;Q8NDH3-3 | PEPL1_HUMAN Probable aminopeptidase NPEPL1 OS=Homo sapiens GN=NPEPL1 PE=1 SV=3;>sp Q8NDH3-2 PEPL1_HUMAN Isoform 2 of Probable aminopeptidase NPEPL1 OS=Homo sapiens GN=NPEPL1 PE=1 SV=3                       | 6.05E-136 |       |
| Q8NDI1;Q8NDI1-2;A8K93    | EHBP1_HUMAN EH domain-binding protein 1 OS=Homo sapiens GN=EHBP1 PE=1 SV=3;>sp Q8NDI1-2 EHBP1_HUMAN Isoform 2 of EH domain-binding protein 1 OS=Homo sapiens GN=EHBP1 PE=1 SV=3                               | 5.56E-15  |       |
| Q8NDM7                   | WDR96_HUMAN WD repeat-containing protein 96 OS=Homo sapiens GN=WDR96 PE=2 SV=3                                                                                                                                |           | 38.38 |
| Q8NDM7-2                 | WDR96_HUMAN Isoform 2 of WD repeat-containing protein 96 OS=Homo sapiens GN=WDR96                                                                                                                             |           | 38.38 |
| Q8NDM7-3                 | WDR96_HUMAN Isoform 3 of WD repeat-containing protein 96 OS=Homo sapiens GN=WDR96                                                                                                                             |           | 31.78 |
| Q8NDM7-4                 | WDR96_HUMAN Isoform 4 of WD repeat-containing protein 96 OS=Homo sapiens GN=WDR96                                                                                                                             |           | 0.38  |
| Q8NDM7-5                 | WDR96_HUMAN Isoform 5 of WD repeat-containing protein 96 OS=Homo sapiens GN=WDR96                                                                                                                             |           | 0.38  |
| Q8NDQ6-4                 | ZN540_HUMAN Isoform 4 of Zinc finger protein 540 OS=Homo sapiens GN=ZNF540                                                                                                                                    |           |       |
| Q8NDT2                   | RB15B_HUMAN Putative RNA-binding protein 15B OS=Homo sapiens GN=RBM15B PE=1 SV=3                                                                                                                              |           |       |
| Q8NDV3                   | SMC1B_HUMAN Structural maintenance of chromosomes protein 1B OS=Homo sapiens GN=SMC1B PE=1 SV=2                                                                                                               |           | 62.31 |
| Q8NDV3-2                 | SMC1B_HUMAN Isoform 2 of Structural maintenance of chromosomes protein 1B OS=Homo sapiens GN=SMC1B                                                                                                            |           | 62.31 |
| Q8NDV3-3                 | SMC1B_HUMAN Isoform 3 of Structural maintenance of chromosomes protein 1B OS=Homo sapiens GN=SMC1B                                                                                                            |           | 62.31 |
| Q8NDW4                   | ZN248_HUMAN Zinc finger protein 248 OS=Homo sapiens GN=ZNF248 PE=1 SV=1                                                                                                                                       |           | 23.91 |
| Q8NDX1                   | PSD4_HUMAN PH and SEC7 domain-containing protein 4 OS=Homo sapiens GN=PSD4 PE=1 SV=2                                                                                                                          |           |       |
| Q8NDX1-2                 | PSD4_HUMAN Isoform 2 of PH and SEC7 domain-containing protein 4 OS=Homo sapiens GN=PSD4                                                                                                                       |           |       |
| Q8NDX5                   | PHC3_HUMAN Polyhomeotic-like protein 3 OS=Homo sapiens GN=PHC3 PE=1 SV=1                                                                                                                                      |           |       |
| Q8NDX5-2                 | PHC3_HUMAN Isoform 2 of Polyhomeotic-like protein 3 OS=Homo sapiens GN=PHC3                                                                                                                                   |           |       |
| Q8NDX5-7                 | PHC3_HUMAN Isoform 7 of Polyhomeotic-like protein 3 OS=Homo sapiens GN=PHC3                                                                                                                                   |           |       |
| Q8NDZ4                   | CC058_HUMAN UPF0672 protein C3orf58 OS=Homo sapiens GN=C3orf58 PE=1 SV=1                                                                                                                                      | 2.99E-15  |       |
| Q8NE18                   | NSUN7_HUMAN Putative methyltransferase NSUN7 OS=Homo sapiens GN=NSUN7 PE=2 SV=4                                                                                                                               |           |       |
| Q8NE18-2                 | NSUN7_HUMAN Isoform 2 of Putative methyltransferase NSUN7 OS=Homo sapiens GN=NSUN7                                                                                                                            |           |       |
| Q8NE28-3                 | SGK71_HUMAN Isoform 3 of Protein kinase-like protein Sgk071 OS=Homo sapiens GN=SGK071                                                                                                                         |           |       |
| Q8NE31-3                 | FA13C_HUMAN Isoform 3 of Protein FAM13C OS=Homo sapiens GN=FAM13C                                                                                                                                             |           |       |
| Q8NE35                   | CPEB3_HUMAN Cytoplasmic polyadenylation element-binding protein 3 OS=Homo sapiens GN=CPEB3 PE=1 SV=2                                                                                                          |           | 24.82 |
| Q8NE35-2                 | CPEB3_HUMAN Isoform 2 of Cytoplasmic polyadenylation element-binding protein 3 OS=Homo sapiens GN=CPEB3                                                                                                       |           | 24.82 |
| Q8NE62;B4DMQ4            | CHDH_HUMAN Choline dehydrogenase, mitochondrial OS=Homo sapiens GN=CHDH PE=2 SV=2;>tr B4DMQ4 B4DMQ4_HUMAN cDNA                                                                                                | 5.96E-19  |       |
| Q8NE63                   | HIPK4_HUMAN Homeodomain-interacting protein kinase 4 OS=Homo sapiens GN=HIPK4 PE=2 SV=1                                                                                                                       |           |       |
| Q8NE63-2                 | HIPK4_HUMAN Isoform 2 of Homeodomain-interacting protein kinase 4 OS=Homo sapiens GN=HIPK4                                                                                                                    |           |       |
| Q8NE71                   | ABCF1_HUMAN ATP-binding cassette sub-family F member 1 OS=Homo sapiens GN=ABCF1 PE=1 SV=2                                                                                                                     |           | 280.3 |
| Q8NE71-2                 | ABCF1_HUMAN Isoform 2 of ATP-binding cassette sub-family F member 1 OS=Homo sapiens GN=ABCF1                                                                                                                  |           | 280.3 |
| Q8NE71;Q8NE71-2          | ABCF1_HUMAN ATP-binding cassette sub-family F member 1 OS=Homo sapiens GN=ABCF1 PE=1 SV=2;>sp Q8NE71-2 ABCF1_HUMAN Isoform 2 of ATP-binding cassette sub-family F member 1 OS=Homo sapiens GN=ABCF1 PE=1 SV=2 | 7.45E-136 |       |
| Q8NEA6                   | GLIS3_HUMAN Zinc finger protein GLIS3 OS=Homo sapiens GN=GLIS3 PE=2 SV=5                                                                                                                                      |           |       |
| Q8NEA6-2                 | GLIS3_HUMAN Isoform 2 of Zinc finger protein GLIS3 OS=Homo sapiens GN=GLIS3                                                                                                                                   |           |       |
| Q8NEB9                   | PK3C3_HUMAN Phosphatidylinositol 3-kinase catalytic subunit type 3 OS=Homo sapiens GN=PIK3C3 PE=1 SV=1                                                                                                        | 3.79E-13  |       |
| Q8NEE6                   | FXL13_HUMAN F-box/LRR-repeat protein 13 OS=Homo sapiens GN=FBXL13 PE=2 SV=3                                                                                                                                   |           |       |
| Q8NEE6-2                 | FXL13_HUMAN Isoform 2 of F-box/LRR-repeat protein 13 OS=Homo sapiens GN=FBXL13                                                                                                                                |           |       |
| Q8NEE6-3                 | FXL13_HUMAN Isoform 3 of F-box/LRR-repeat protein 13 OS=Homo sapiens GN=FBXL13                                                                                                                                |           |       |
| Q8NEE6-4                 | FXL13_HUMAN Isoform 4 of F-box/LRR-repeat protein 13 OS=Homo sapiens GN=FBXL13                                                                                                                                |           |       |
| Q8NEE8                   | TTC16_HUMAN Tetratricopeptide repeat protein 16 OS=Homo sapiens GN=TTC16 PE=2 SV=2                                                                                                                            |           |       |
| Q8NEG5                   | ZSWIM2_HUMAN E3 ubiquitin-protein ligase ZSWIM2 OS=Homo sapiens GN=ZSWIM2 PE=1 SV=2                                                                                                                           |           |       |
| Q8NEJ0                   | DUS18_HUMAN Dual specificity protein phosphatase 18 OS=Homo sapiens GN=DUSP18 PE=1 SV=1                                                                                                                       |           | 13.65 |
| Q8NEJ9                   | NGDN_HUMAN Neuroguidin OS=Homo sapiens GN=NGDN PE=1 SV=1                                                                                                                                                      |           |       |
| Q8NEJ9-2                 | NGDN_HUMAN Isoform 2 of Neuroguidin OS=Homo sapiens GN=NGDN                                                                                                                                                   |           |       |
| Q8NEJ9;Q8NEJ9-2          | NGDN_HUMAN Neuroguidin OS=Homo sapiens GN=NGDN PE=1 SV=1;>sp Q8NEJ9-2 NGDN_HUMAN Isoform 2 of Neuroguidin OS=Homo sapiens GN=NGDN PE=1 SV=1                                                                   | 3.54E-12  |       |
| Q8NEM2                   | SHCBP_HUMAN SHC SH2 domain-binding protein 1 OS=Homo sapiens GN=SHCBP1 PE=1 SV=3                                                                                                                              | 1.52E-07  |       |
| Q8NEV4                   | MYO3A_HUMAN Myosin-IIIa OS=Homo sapiens GN=MYO3A PE=1 SV=2                                                                                                                                                    |           |       |
| Q8NEW0                   | ZNT7_HUMAN Zinc transporter 7 OS=Homo sapiens GN=SLC30A7 PE=1 SV=1                                                                                                                                            |           | 33.66 |
| Q8NEY1                   | NAV1_HUMAN Neuron navigator 1 OS=Homo sapiens GN=NAV1 PE=1 SV=2                                                                                                                                               |           | 31.67 |
| Q8NEY1-2                 | NAV1_HUMAN Isoform 2 of Neuron navigator 1 OS=Homo sapiens GN=NAV1                                                                                                                                            |           | 31.67 |
| Q8NEY1-3                 | NAV1_HUMAN Isoform 3 of Neuron navigator 1 OS=Homo sapiens GN=NAV1                                                                                                                                            |           | 31.67 |
| Q8NEY1-4                 | NAV1_HUMAN Isoform 4 of Neuron navigator 1 OS=Homo sapiens GN=NAV1                                                                                                                                            |           | 31.67 |

|                          |                                                                                                                                                                                                   |          |          |
|--------------------------|---------------------------------------------------------------------------------------------------------------------------------------------------------------------------------------------------|----------|----------|
| Q8NEY1-5                 | NAV1_HUMAN Isoform 5 of Neuron navigator 1 OS=Homo sapiens GN=NAV1                                                                                                                                |          | 31.67    |
| Q8NEY1-6                 | NAV1_HUMAN Isoform 6 of Neuron navigator 1 OS=Homo sapiens GN=NAV1                                                                                                                                |          | 21.63    |
| Q8NEY1-7                 | NAV1_HUMAN Isoform 7 of Neuron navigator 1 OS=Homo sapiens GN=NAV1                                                                                                                                |          | 31.67    |
| Q8NEY1;Q8NEY1-3;Q8NEY1-5 | NAV1_HUMAN Neuron navigator 1 OS=Homo sapiens GN=NAV1 PE=1 SV=2;>sp Q8NEY1-3 NAV1_HUMAN Isoform 3 of Neuron navigator 1 OS=Homo sapiens GN=NAV1                                                   | 1.05E-13 |          |
| Q8NEY8                   | PPHLN_HUMAN Periphilin-1 OS=Homo sapiens GN=PPHLN1 PE=1 SV=2                                                                                                                                      |          |          |
| Q8NEY8-2                 | PPHLN_HUMAN Isoform 2 of Periphilin-1 OS=Homo sapiens GN=PPHLN1                                                                                                                                   |          |          |
| Q8NEY8-3                 | PPHLN_HUMAN Isoform 3 of Periphilin-1 OS=Homo sapiens GN=PPHLN1                                                                                                                                   |          |          |
| Q8NEY8-5                 | PPHLN_HUMAN Isoform 5 of Periphilin-1 OS=Homo sapiens GN=PPHLN1                                                                                                                                   |          |          |
| Q8NEY8-6                 | PPHLN_HUMAN Isoform 6 of Periphilin-1 OS=Homo sapiens GN=PPHLN1                                                                                                                                   |          |          |
| Q8NEY8-8                 | PPHLN_HUMAN Isoform 8 of Periphilin-1 OS=Homo sapiens GN=PPHLN1                                                                                                                                   |          |          |
| Q8NEZ4                   | MLL3_HUMAN Histone-lysine N-methyltransferase MLL3 OS=Homo sapiens GN=MLL3 PE=1 SV=3                                                                                                              |          |          |
| Q8NEZ4-2                 | MLL3_HUMAN Isoform 2 of Histone-lysine N-methyltransferase MLL3 OS=Homo sapiens GN=MLL3                                                                                                           |          |          |
| Q8NEZ4-3                 | MLL3_HUMAN Isoform 3 of Histone-lysine N-methyltransferase MLL3 OS=Homo sapiens GN=MLL3                                                                                                           |          |          |
| Q8NEZ5;Q8NEZ5-3          | FBX22_HUMAN F-box only protein 22 OS=Homo sapiens GN=FBX22 PE=1 SV=1;>sp Q8NEZ5-3 FBX22_HUMAN Isoform 3 of F-box only protein 22 OS=Homo sapiens GN=FBX22                                         | 2.18E-07 |          |
| Q8NF37                   | PCAT1_HUMAN Lysophosphatidylcholine acyltransferase 1 OS=Homo sapiens GN=LPCAT1 PE=1 SV=2                                                                                                         |          | 136.23   |
| Q8NF50                   | DOCK8_HUMAN Dedicator of cytokinesis protein 8 OS=Homo sapiens GN=DOCK8 PE=1 SV=3                                                                                                                 |          |          |
| Q8NF50-2                 | DOCK8_HUMAN Isoform 2 of Dedicator of cytokinesis protein 8 OS=Homo sapiens GN=DOCK8                                                                                                              |          |          |
| Q8NF50-3                 | DOCK8_HUMAN Isoform 3 of Dedicator of cytokinesis protein 8 OS=Homo sapiens GN=DOCK8                                                                                                              |          |          |
| Q8NF91                   | SYNE1_HUMAN Nesprin-1 OS=Homo sapiens GN=SYNE1 PE=1 SV=3                                                                                                                                          |          | 272.08   |
| Q8NF91-2                 | SYNE1_HUMAN Isoform 2 of Nesprin-1 OS=Homo sapiens GN=SYNE1                                                                                                                                       |          | 59.9     |
| Q8NF91-3                 | SYNE1_HUMAN Isoform 3 of Nesprin-1 OS=Homo sapiens GN=SYNE1                                                                                                                                       |          | 9.3      |
| Q8NF91-4                 | SYNE1_HUMAN Isoform 4 of Nesprin-1 OS=Homo sapiens GN=SYNE1                                                                                                                                       |          | 272.08   |
| Q8NF91-5                 | SYNE1_HUMAN Isoform 5 of Nesprin-1 OS=Homo sapiens GN=SYNE1                                                                                                                                       |          | 77.59    |
| Q8NF91-6                 | SYNE1_HUMAN Isoform 6 of Nesprin-1 OS=Homo sapiens GN=SYNE1                                                                                                                                       |          | 96.79    |
| Q8NF91-7                 | SYNE1_HUMAN Isoform 7 of Nesprin-1 OS=Homo sapiens GN=SYNE1                                                                                                                                       |          | 212.18   |
| Q8NF91-8                 | SYNE1_HUMAN Isoform 8 of Nesprin-1 OS=Homo sapiens GN=SYNE1                                                                                                                                       |          | 56.53    |
| Q8NF91-9                 | SYNE1_HUMAN Isoform 9 of Nesprin-1 OS=Homo sapiens GN=SYNE1                                                                                                                                       |          |          |
| Q8NF91;Q8NF91-4;Q8NF91-5 | SYNE1_HUMAN Nesprin-1 OS=Homo sapiens GN=SYNE1 PE=1 SV=3;>sp Q8NF91-4 SYNE1_HUMAN Isoform 4 of Nesprin-1 OS=Homo sapiens GN=SYNE1                                                                 | 1.10E-29 |          |
| Q8NF99                   | ZNF397_HUMAN Zinc finger protein 397 OS=Homo sapiens GN=ZNF397 PE=1 SV=2                                                                                                                          |          |          |
| Q8NFA0                   | UBP32_HUMAN Ubiquitin carboxyl-terminal hydrolase 32 OS=Homo sapiens GN=USP32 PE=1 SV=1                                                                                                           |          |          |
| Q8NFC6                   | BOD1L_HUMAN Biorientation of chromosomes in cell division protein 1-like OS=Homo sapiens GN=BOD1L PE=1 SV=2                                                                                       |          | 96.6     |
| Q8NFD5                   | ARI1B_HUMAN AT-rich interactive domain-containing protein 1B OS=Homo sapiens GN=ARID1B PE=1 SV=2                                                                                                  |          |          |
| Q8NFD5-2                 | ARI1B_HUMAN Isoform 2 of AT-rich interactive domain-containing protein 1B OS=Homo sapiens GN=ARID1B                                                                                               |          |          |
| Q8NFD5-3                 | ARI1B_HUMAN Isoform 3 of AT-rich interactive domain-containing protein 1B OS=Homo sapiens GN=ARID1B                                                                                               |          |          |
| Q8NFD5-4                 | ARI1B_HUMAN Isoform 4 of AT-rich interactive domain-containing protein 1B OS=Homo sapiens GN=ARID1B                                                                                               |          |          |
| Q8NFF5                   | FAD1_HUMAN FAD synthase OS=Homo sapiens GN=FLAD1 PE=1 SV=1                                                                                                                                        |          |          |
| Q8NFF5-2                 | FAD1_HUMAN Isoform 2 of FAD synthase OS=Homo sapiens GN=FLAD1                                                                                                                                     |          |          |
| Q8NFF5-3                 | FAD1_HUMAN Isoform 3 of FAD synthase OS=Homo sapiens GN=FLAD1                                                                                                                                     |          |          |
| Q8NFF5-4                 | FAD1_HUMAN Isoform 4 of FAD synthase OS=Homo sapiens GN=FLAD1                                                                                                                                     |          |          |
| Q8NFF5-5                 | FAD1_HUMAN Isoform 5 of FAD synthase OS=Homo sapiens GN=FLAD1                                                                                                                                     |          |          |
| Q8NFF5;Q8NFF5-2;Q8NFF5-3 | FAD1_HUMAN FAD synthase OS=Homo sapiens GN=FLAD1 PE=1 SV=1;>sp Q8NFF5-2 FAD1_HUMAN Isoform 2 of FAD synthase OS=Homo sapiens GN=FLAD1                                                             | 1.20E-16 |          |
| Q8NFH3                   | NUP43_HUMAN Nucleoporin Nup43 OS=Homo sapiens GN=NUP43 PE=1 SV=1                                                                                                                                  |          | 4.85E-11 |
| Q8NFH4                   | NUP37_HUMAN Nucleoporin Nup37 OS=Homo sapiens GN=NUP37 PE=1 SV=1                                                                                                                                  |          |          |
| Q8NFH5                   | NUP53_HUMAN Nucleoporin NUP53 OS=Homo sapiens GN=NUP35 PE=1 SV=1                                                                                                                                  |          |          |
| Q8NFI4                   | F10A5_HUMAN Putative protein FAM10A5 OS=Homo sapiens GN=ST13P5 PE=5 SV=1                                                                                                                          |          | 40.25    |
| Q8NFJ5                   | RAI3_HUMAN Retinoic acid-induced protein 3 OS=Homo sapiens GN=GPRC5A PE=1 SV=2                                                                                                                    |          | 59.31    |
| Q8NFP9                   | NBEA_HUMAN Neurobeachin OS=Homo sapiens GN=NBEA PE=1 SV=3                                                                                                                                         |          | 59.43    |
| Q8NFP9-2                 | NBEA_HUMAN Isoform 2 of Neurobeachin OS=Homo sapiens GN=NBEA                                                                                                                                      |          | 18.54    |
| Q8NFP9;P50851;P50851-2   | NBEA_HUMAN Neurobeachin OS=Homo sapiens GN=NBEA PE=1 SV=3;>sp P50851 LRBA_HUMAN Lipopolysaccharide-responsive and CD135 antigen OS=Homo sapiens GN=LRBA                                           | 1.07E-05 |          |
| Q8NFQ8                   | TOIP2_HUMAN Torsin-1A-interacting protein 2 OS=Homo sapiens GN=TOR1AIP2 PE=1 SV=1                                                                                                                 |          |          |
| Q8NFR3                   | SSPTB_HUMAN Small subunit of serine palmitoyltransferase B OS=Homo sapiens GN=SSSPTB PE=1 SV=1                                                                                                    |          |          |
| Q8NFU3-4;Q8NFU3;Q8NFU3-1 | TSTD1_HUMAN Isoform 4 of Thiosulfate sulfurtransferase/rhodanese-like domain-containing protein 1 OS=Homo sapiens GN=TSTD1                                                                        | 1.97E-12 |          |
| Q8NFU7                   | TET1_HUMAN Methylcytosine dioxygenase TET1 OS=Homo sapiens GN=TET1 PE=1 SV=2                                                                                                                      |          |          |
| Q8NFV4                   | ABHDB_HUMAN Abhydrolase domain-containing protein 11 OS=Homo sapiens GN=ABHD11 PE=1 SV=1                                                                                                          |          | 38.01    |
| Q8NFV4-2                 | ABHDB_HUMAN Isoform 2 of Abhydrolase domain-containing protein 11 OS=Homo sapiens GN=ABHD11                                                                                                       |          |          |
| Q8NFV4-3                 | ABHDB_HUMAN Isoform 3 of Abhydrolase domain-containing protein 11 OS=Homo sapiens GN=ABHD11                                                                                                       |          |          |
| Q8NFV4-4                 | ABHDB_HUMAN Isoform 4 of Abhydrolase domain-containing protein 11 OS=Homo sapiens GN=ABHD11                                                                                                       |          | 38.01    |
| Q8NFV4-5                 | ABHDB_HUMAN Isoform 5 of Abhydrolase domain-containing protein 11 OS=Homo sapiens GN=ABHD11                                                                                                       |          |          |
| Q8NFV4;Q8NFV4-4          | ABHDB_HUMAN Abhydrolase domain-containing protein 11 OS=Homo sapiens GN=ABHD11 PE=1 SV=1;>sp Q8NFV4-4 ABHDB_HUMAN Isoform 4 of Abhydrolase domain-containing protein 11 OS=Homo sapiens GN=ABHD11 | 1.46E-17 |          |
| Q8NFW1;Q8NFW1-2;Q8NFW1-1 | COMA1_HUMAN Collagen alpha-1(XVII) chain OS=Homo sapiens GN=COL22A1 PE=1 SV=2;>sp Q8NFW1-2 COMA1_HUMAN Isoform 2 of Collagen alpha-1(XVII) chain OS=Homo sapiens GN=COL22A1                       | 3.92E-05 |          |
| Q8NFW8                   | NEUA_HUMAN N-acylneuraminyltransferase OS=Homo sapiens GN=CMAS PE=1 SV=2                                                                                                                          |          |          |

|                       |                                                                                                                           |           |        |
|-----------------------|---------------------------------------------------------------------------------------------------------------------------|-----------|--------|
| Q8NFW8-2              | NEUA_HUMAN Isoform 2 of N-acylneuraminase cytidyltransferase OS=Homo sapiens GN=CMAS                                      |           |        |
| Q8NFW8;Q8NFW8-2       | NEUA_HUMAN N-acylneuraminase cytidyltransferase OS=Homo sapiens GN=CMAS PE=1 SV=2;>sp Q8NFW8-2 NEUA_HUMAN Isofor          | 5.38E-09  |        |
| Q8NG11                | TSN14_HUMAN Tetraspanin-14 OS=Homo sapiens GN=TSPAN14 PE=2 SV=1                                                           |           | 40.88  |
| Q8NG11-2              | TSN14_HUMAN Isoform 2 of Tetraspanin-14 OS=Homo sapiens GN=TSPAN14                                                        |           | 40.88  |
| Q8NG11;Q8NG11-2       | TSN14_HUMAN Tetraspanin-14 OS=Homo sapiens GN=TSPAN14 PE=2 SV=1;>sp Q8NG11-2 TSN14_HUMAN Isoform 2 of Tetraspanin-        | 2.46E-13  |        |
| Q8NG48                | LINES_HUMAN Protein Lines homolog OS=Homo sapiens GN=LINS PE=2 SV=2                                                       |           |        |
| Q8NG48-2              | LINES_HUMAN Isoform 2 of Protein Lines homolog OS=Homo sapiens GN=LINS                                                    |           |        |
| Q8NG48-3              | LINES_HUMAN Isoform 3 of Protein Lines homolog OS=Homo sapiens GN=LINS                                                    |           |        |
| Q8NG57                | ELOA3_HUMAN RNA polymerase II transcription factor SIII subunit A3 OS=Homo sapiens GN=TCEB3C PE=1 SV=2                    |           |        |
| Q8NGC1                | O11G2_HUMAN Olfactory receptor 11G2 OS=Homo sapiens GN=OR11G2 PE=2 SV=2                                                   |           |        |
| Q8NGF0                | O52B6_HUMAN Olfactory receptor 52B6 OS=Homo sapiens GN=OR52B6 PE=2 SV=3                                                   |           |        |
| Q8NGI6                | OR4DA_HUMAN Olfactory receptor 4D10 OS=Homo sapiens GN=OR4D10 PE=2 SV=1                                                   |           |        |
| Q8NGU9                | GP150_HUMAN Probable G-protein coupled receptor 150 OS=Homo sapiens GN=GPR150 PE=2 SV=1                                   |           | 21.37  |
| Q8NGW1                | OR6B3_HUMAN Olfactory receptor 6B3 OS=Homo sapiens GN=OR6B3 PE=2 SV=1                                                     |           |        |
| Q8NGZ6                | OR6F1_HUMAN Olfactory receptor 6F1 OS=Homo sapiens GN=OR6F1 PE=2 SV=1                                                     |           |        |
| Q8NH61                | O51F2_HUMAN Olfactory receptor 51F2 OS=Homo sapiens GN=OR51F2 PE=2 SV=2                                                   |           |        |
| Q8NHG7                | SVIP_HUMAN Small VCP/p97-interacting protein OS=Homo sapiens GN=SVIP PE=2 SV=1                                            |           | 79.18  |
| Q8NHG8                | ZNRF2_HUMAN E3 ubiquitin-protein ligase ZNRF2 OS=Homo sapiens GN=ZNRF2 PE=1 SV=1                                          | 2.01E-06  |        |
| Q8NHH9                | ATLA2_HUMAN Atlastin-2 OS=Homo sapiens GN=ATL2 PE=1 SV=2                                                                  |           | 31.88  |
| Q8NHH9-2              | ATLA2_HUMAN Isoform 2 of Atlastin-2 OS=Homo sapiens GN=ATL2                                                               |           | 31.88  |
| Q8NHH9-3              | ATLA2_HUMAN Isoform 3 of Atlastin-2 OS=Homo sapiens GN=ATL2                                                               |           | 2.63   |
| Q8NHH9-4              | ATLA2_HUMAN Isoform 4 of Atlastin-2 OS=Homo sapiens GN=ATL2                                                               |           | 31.88  |
| Q8NHH9;Q8NHH9-2;B7Z1  | ATLA2_HUMAN Atlastin-2 OS=Homo sapiens GN=ATL2 PE=1 SV=2;>sp Q8NHH9-2 ATLA2_HUMAN Isoform 2 of Atlastin-2 OS=Homo s       | 8.89E-09  |        |
| Q8NHM4                | TRY6_HUMAN Putative trypsin-6 OS=Homo sapiens GN=TRY6 PE=5 SV=1                                                           |           |        |
| Q8NHP1                | ARK74_HUMAN Aflatoxin B1 aldehyde reductase member 4 OS=Homo sapiens GN=AKR7L PE=2 SV=6                                   |           | 67.59  |
| Q8NHP6                | MSPD2_HUMAN Motile sperm domain-containing protein 2 OS=Homo sapiens GN=MOSPD2 PE=1 SV=1                                  | 1.29E-12  |        |
| Q8NHP8                | PLBL2_HUMAN Putative phospholipase B-like 2 OS=Homo sapiens GN=PLBD2 PE=1 SV=2                                            |           | 43.31  |
| Q8NHQ9                | DDX55_HUMAN ATP-dependent RNA helicase DDX55 OS=Homo sapiens GN=DDX55 PE=1 SV=3                                           | 2.97E-14  |        |
| Q8NHS0                | DNJB8_HUMAN DnaJ homolog subfamily B member 8 OS=Homo sapiens GN=DNAJB8 PE=1 SV=1                                         |           |        |
| Q8NHS9                | SPT22_HUMAN Spermatogenesis-associated protein 22 OS=Homo sapiens GN=SPATA22 PE=1 SV=2                                    |           |        |
| Q8NHS9-2              | SPT22_HUMAN Isoform 2 of Spermatogenesis-associated protein 22 OS=Homo sapiens GN=SPATA22                                 |           |        |
| Q8NHU6;Q8NHU6-2       | TDRD7_HUMAN Tudor domain-containing protein 7 OS=Homo sapiens GN=TDRD7 PE=1 SV=2;>sp Q8NHU6-2 TDRD7_HUMAN Isoforr         | 7.75E-10  |        |
| Q8NHV1                | GIMA7_HUMAN GTPase IMAP family member 7 OS=Homo sapiens GN=GIMAP7 PE=2 SV=1                                               | 2.55E-09  |        |
| Q8NHW5                | RLA0L_HUMAN 60S acidic ribosomal protein P0-like OS=Homo sapiens GN=RPLP0P6 PE=5 SV=1                                     |           | 573.66 |
| Q8NHY3                | GA2L2_HUMAN GAS2-like protein 2 OS=Homo sapiens GN=GAS2L2 PE=2 SV=1                                                       |           | 28.85  |
| Q8NI22                | MCFD2_HUMAN Multiple coagulation factor deficiency protein 2 OS=Homo sapiens GN=MCFD2 PE=1 SV=1                           |           | 63.37  |
| Q8NI27                | THOC2_HUMAN THO complex subunit 2 OS=Homo sapiens GN=THOC2 PE=1 SV=2                                                      |           | 81.67  |
| Q8NI27-2              | THOC2_HUMAN Isoform 2 of THO complex subunit 2 OS=Homo sapiens GN=THOC2                                                   |           | 0.99   |
| Q8NI27;B4DKZ6;Q6P441; | THOC2_HUMAN THO complex subunit 2 OS=Homo sapiens GN=THOC2 PE=1 SV=2;>tr B4DKZ6 B4DKZ6_HUMAN cDNA FLJ61096, hiç           | 3.30E-09  |        |
| Q8NI29                | FBX27_HUMAN F-box only protein 27 OS=Homo sapiens GN=FBXO27 PE=1 SV=2                                                     |           |        |
| Q8NI36                | WDR36_HUMAN WD repeat-containing protein 36 OS=Homo sapiens GN=WDR36 PE=1 SV=1                                            |           |        |
| Q8NI77                | KI18A_HUMAN Kinesin-like protein KIF18A OS=Homo sapiens GN=KIF18A PE=1 SV=2                                               |           |        |
| Q8TAA1                | RNS11_HUMAN Probable ribonuclease 11 OS=Homo sapiens GN=RNASE11 PE=2 SV=1                                                 |           |        |
| Q8TAA3                | PSA7L_HUMAN Proteasome subunit alpha type-7-like OS=Homo sapiens GN=PSMA8 PE=1 SV=3                                       |           | 330.79 |
| Q8TAA3-2              | PSA7L_HUMAN Isoform 2 of Proteasome subunit alpha type-7-like OS=Homo sapiens GN=PSMA8                                    |           | 323.84 |
| Q8TAA3-5              | PSA7L_HUMAN Isoform 3 of Proteasome subunit alpha type-7-like OS=Homo sapiens GN=PSMA8                                    |           | 330.79 |
| Q8TAD4                | ZNT5_HUMAN Zinc transporter 5 OS=Homo sapiens GN=SLC30A5 PE=1 SV=1                                                        |           |        |
| Q8TAE8                | G45IP_HUMAN Growth arrest and DNA damage-inducible proteins-interacting protein 1 OS=Homo sapiens GN=GADD45GIP1 PE=1 SV=1 |           |        |
| Q8TAF5                | LQK1_HUMAN Putative uncharacterized protein LQK1 OS=Homo sapiens GN=LQK1 PE=2 SV=1                                        |           |        |
| Q8TAL5                | CI043_HUMAN Uncharacterized protein C9orf43 OS=Homo sapiens GN=C9orf43 PE=1 SV=1                                          |           |        |
| Q8TAM1                | BBS10_HUMAN Bardet-Biedl syndrome 10 protein OS=Homo sapiens GN=BBS10 PE=1 SV=2                                           |           |        |
| Q8TAP9                | TTDN1_HUMAN TTD non-photosensitive 1 protein OS=Homo sapiens GN=TTDN1 PE=1 SV=1                                           | 1.41E-21  |        |
| Q8TAQ2                | SMRC2_HUMAN SWI/SNF complex subunit SMARCC2 OS=Homo sapiens GN=SMARCC2 PE=1 SV=1                                          |           |        |
| Q8TAQ2-2              | SMRC2_HUMAN Isoform 2 of SWI/SNF complex subunit SMARCC2 OS=Homo sapiens GN=SMARCC2                                       |           |        |
| Q8TAQ2;Q59GV3;Q59G16  | SMRC2_HUMAN SWI/SNF complex subunit SMARCC2 OS=Homo sapiens GN=SMARCC2 PE=1 SV=1;>tr Q59GV3 Q59GV3_HUMAN SW               | 1.61E-205 |        |
| Q8TAT5                | NEIL3_HUMAN Endonuclease 8-like 3 OS=Homo sapiens GN=NEIL3 PE=1 SV=3                                                      | 1.37E-11  |        |
| Q8TAT6                | NPL4_HUMAN Nuclear protein localization protein 4 homolog OS=Homo sapiens GN=NPLOC4 PE=1 SV=3                             |           | 148.59 |
| Q8TAT6-2              | NPL4_HUMAN Isoform 2 of Nuclear protein localization protein 4 homolog OS=Homo sapiens GN=NPLOC4                          |           | 148.59 |
| Q8TAT6-2;Q8TAT6       | 2 NPL4_HUMAN Isoform 2 of Nuclear protein localization protein 4 homolog OS=Homo sapiens GN=NPLOC4;>sp Q8TAT6 NPL4_HUMA   | 2.32E-65  |        |
| Q8TAU0                | NKX23_HUMAN Homeobox protein Nkx-2.3 OS=Homo sapiens GN=NKX2-3 PE=1 SV=2                                                  |           |        |
| Q8TAV4                | STML3_HUMAN Stomatin-like protein 3 OS=Homo sapiens GN=STOML3 PE=1 SV=1                                                   |           | 17.18  |

|                          |                                                                                                                                                                                                                         |          |        |
|--------------------------|-------------------------------------------------------------------------------------------------------------------------------------------------------------------------------------------------------------------------|----------|--------|
| Q8TB03;Q8TB03-2          | CX038_HUMAN Uncharacterized protein CXorf38 OS=Homo sapiens GN=CXorf38 PE=1 SV=1;>sp Q8TB03-2 CX038_HUMAN Isoform 1                                                                                                     | 1.61E-10 |        |
| Q8TB24                   | RIN3_HUMAN Ras and Rab interactor 3 OS=Homo sapiens GN=RIN3 PE=1 SV=4                                                                                                                                                   |          | 15.93  |
| Q8TB24-4                 | RIN3_HUMAN Isoform 4 of Ras and Rab interactor 3 OS=Homo sapiens GN=RIN3                                                                                                                                                |          | 15.93  |
| Q8TB45                   | DPTOR_HUMAN DEP domain-containing mTOR-interacting protein OS=Homo sapiens GN=DEPTOR PE=1 SV=2                                                                                                                          |          | 30.67  |
| Q8TB61                   | S35B2_HUMAN Adenosine 3'-phospho 5'-phosphosulfate transporter 1 OS=Homo sapiens GN=SLC35B2 PE=1 SV=1                                                                                                                   |          | 27.61  |
| Q8TB61-2                 | S35B2_HUMAN Isoform 2 of Adenosine 3'-phospho 5'-phosphosulfate transporter 1 OS=Homo sapiens GN=SLC35B2                                                                                                                |          | 27.61  |
| Q8TB61-3                 | S35B2_HUMAN Isoform 3 of Adenosine 3'-phospho 5'-phosphosulfate transporter 1 OS=Homo sapiens GN=SLC35B2                                                                                                                |          | 27.61  |
| Q8TB61;Q8TB61-2;Q8TB68   | S35B2_HUMAN Adenosine 3-phospho 5-phosphosulfate transporter 1 OS=Homo sapiens GN=SLC35B2 PE=1 SV=1;>sp Q8TB61-2 S35B2_HUMAN Isoform 2 of Adenosine 3-phospho 5-phosphosulfate transporter 1 OS=Homo sapiens GN=SLC35B2 | 1.04E-15 |        |
| Q8TB68                   | PRR7_HUMAN Proline-rich protein 7 OS=Homo sapiens GN=PRR7 PE=2 SV=1                                                                                                                                                     |          |        |
| Q8TB68-2                 | PRR7_HUMAN Isoform 2 of Proline-rich protein 7 OS=Homo sapiens GN=PRR7                                                                                                                                                  |          |        |
| Q8TB72;Q8TB72-3;Q8TB72-4 | PUM2_HUMAN Pumilio homolog 2 OS=Homo sapiens GN=PUM2 PE=1 SV=2;>sp Q8TB72-3 PUM2_HUMAN Isoform 3 of Pumilio homolog 2 OS=Homo sapiens GN=PUM2                                                                           | 2.10E-08 |        |
| Q8TBA6;Q8TBA6-2          | GOGA5_HUMAN Golgin subfamily A member 5 OS=Homo sapiens GN=GOLGA5 PE=1 SV=3;>sp Q8TBA6-2 GOGA5_HUMAN Isoform 2 of Golgin subfamily A member 5 OS=Homo sapiens GN=GOLGA5                                                 | 9.75E-10 |        |
| Q8TBB1                   | LNX1_HUMAN E3 ubiquitin-protein ligase LNX OS=Homo sapiens GN=LNX1 PE=1 SV=1                                                                                                                                            |          |        |
| Q8TBB1-2                 | LNX1_HUMAN Isoform 2 of E3 ubiquitin-protein ligase LNX OS=Homo sapiens GN=LNX1                                                                                                                                         |          |        |
| Q8TBC4                   | UBA3_HUMAN NEDD8-activating enzyme E1 catalytic subunit OS=Homo sapiens GN=UBA3 PE=1 SV=2                                                                                                                               |          | 52.74  |
| Q8TBC4-2                 | UBA3_HUMAN Isoform 2 of NEDD8-activating enzyme E1 catalytic subunit OS=Homo sapiens GN=UBA3                                                                                                                            |          | 52.74  |
| Q8TBC4;Q8TBC4-2          | UBA3_HUMAN NEDD8-activating enzyme E1 catalytic subunit OS=Homo sapiens GN=UBA3 PE=1 SV=2;>sp Q8TBC4-2 UBA3_HUMAN Isoform 2 of NEDD8-activating enzyme E1 catalytic subunit OS=Homo sapiens GN=UBA3                     | 9.42E-24 |        |
| Q8TBE9                   | NANP_HUMAN N-acyleuraminatase OS=Homo sapiens GN=NANP PE=1 SV=1                                                                                                                                                         |          | 26.59  |
| Q8TBF4                   | ZCRB1_HUMAN Zinc finger CCHC-type and RNA-binding motif-containing protein 1 OS=Homo sapiens GN=ZCRB1 PE=1 SV=2                                                                                                         |          | 36.38  |
| Q8TBQ9                   | KISHA_HUMAN Protein kish-A OS=Homo sapiens GN=TMEM167A PE=2 SV=1                                                                                                                                                        |          | 77.63  |
| Q8TBR4                   | STG34_HUMAN STAG3-like protein 4 OS=Homo sapiens GN=STAG3L4 PE=2 SV=1                                                                                                                                                   |          |        |
| Q8TBX8                   | PI42C_HUMAN Phosphatidylinositol-5-phosphate 4-kinase type-2 gamma OS=Homo sapiens GN=PIP4K2C PE=1 SV=3                                                                                                                 |          |        |
| Q8TBY9                   | WDR66_HUMAN WD repeat-containing protein 66 OS=Homo sapiens GN=WDR66 PE=1 SV=2                                                                                                                                          |          |        |
| Q8TBY9-2                 | WDR66_HUMAN Isoform 2 of WD repeat-containing protein 66 OS=Homo sapiens GN=WDR66                                                                                                                                       |          |        |
| Q8TBY9-3                 | WDR66_HUMAN Isoform 3 of WD repeat-containing protein 66 OS=Homo sapiens GN=WDR66                                                                                                                                       |          |        |
| Q8TBZ3                   | WDR20_HUMAN WD repeat-containing protein 20 OS=Homo sapiens GN=WDR20 PE=1 SV=2                                                                                                                                          |          |        |
| Q8TBZ3-2                 | WDR20_HUMAN Isoform 2 of WD repeat-containing protein 20 OS=Homo sapiens GN=WDR20                                                                                                                                       |          |        |
| Q8TC07-2;Q8TC07          | TBC15_HUMAN Isoform 2 of TBC1 domain family member 15 OS=Homo sapiens GN=TBC1D15;>sp Q8TC07 TBC15_HUMAN TBC1 domain family member 15 OS=Homo sapiens GN=TBC1D15                                                         | 6.21E-09 |        |
| Q8TC07;Q8TC07-2          | TBC15_HUMAN TBC1 domain family member 15 OS=Homo sapiens GN=TBC1D15 PE=1 SV=2;>sp Q8TC07-2 TBC15_HUMAN Isoform 2 of TBC1 domain family member 15 OS=Homo sapiens GN=TBC1D15                                             | 1.60E-09 |        |
| Q8TC12                   | RDH11_HUMAN Retinol dehydrogenase 11 OS=Homo sapiens GN=RDH11 PE=1 SV=2                                                                                                                                                 |          | 369.56 |
| Q8TC12-2                 | RDH11_HUMAN Isoform 2 of Retinol dehydrogenase 11 OS=Homo sapiens GN=RDH11                                                                                                                                              |          | 302.63 |
| Q8TC12;Q8TC12-2          | RDH11_HUMAN Retinol dehydrogenase 11 OS=Homo sapiens GN=RDH11 PE=1 SV=2;>sp Q8TC12-2 RDH11_HUMAN Isoform 2 of Retinol dehydrogenase 11 OS=Homo sapiens GN=RDH11                                                         | 2.34E-62 |        |
| Q8TCA0;Q8TCA0-3;Q8TCA0-4 | LRC20_HUMAN Leucine-rich repeat-containing protein 20 OS=Homo sapiens GN=LRR20 PE=2 SV=1;>sp Q8TCA0-3 LRC20_HUMAN LRR20 domain family member 1 OS=Homo sapiens GN=LRR20                                                 | 1.74E-08 |        |
| Q8TCC3                   | RM30_HUMAN 39S ribosomal protein L30, mitochondrial OS=Homo sapiens GN=MRPL30 PE=1 SV=1                                                                                                                                 |          | 68.02  |
| Q8TCC3-2                 | RM30_HUMAN Isoform 2 of 39S ribosomal protein L30, mitochondrial OS=Homo sapiens GN=MRPL30                                                                                                                              |          | 68.02  |
| Q8TCC3-2;D3DVI0;Q8TCC3-3 | RM30_HUMAN Isoform 2 of 39S ribosomal protein L30, mitochondrial OS=Homo sapiens GN=MRPL30;>tr D3DVI0 D3DVI0_HUMAN Isoform 2 of 39S ribosomal protein L30, mitochondrial OS=Homo sapiens GN=MRPL30                      | 4.77E-19 |        |
| Q8TCC3-3                 | RM30_HUMAN Isoform 3 of 39S ribosomal protein L30, mitochondrial OS=Homo sapiens GN=MRPL30                                                                                                                              |          | 68.02  |
| Q8TCD5                   | NT5C_HUMAN 5(3)-deoxyribonucleotidase, cytosolic type OS=Homo sapiens GN=NT5C PE=1 SV=2                                                                                                                                 | 1.58E-05 |        |
| Q8TCF1                   | ZFAN1_HUMAN AN1-type zinc finger protein 1 OS=Homo sapiens GN=ZFAND1 PE=1 SV=1                                                                                                                                          |          | 29.46  |
| Q8TCF1-2                 | ZFAN1_HUMAN Isoform 2 of AN1-type zinc finger protein 1 OS=Homo sapiens GN=ZFAND1                                                                                                                                       |          | 29.46  |
| Q8TCF1;Q05BD2;Q8TCF1-2   | ZFAN1_HUMAN AN1-type zinc finger protein 1 OS=Homo sapiens GN=ZFAND1 PE=1 SV=1;>tr Q05BD2 Q05BD2_HUMAN ZFAND1 protein 1 OS=Homo sapiens GN=ZFAND1                                                                       | 4.41E-08 |        |
| Q8TCG1                   | CIP2A_HUMAN Protein CIP2A OS=Homo sapiens GN=KIAA1524 PE=1 SV=2                                                                                                                                                         |          | 33.45  |
| Q8TCG1-2                 | CIP2A_HUMAN Isoform 2 of Protein CIP2A OS=Homo sapiens GN=KIAA1524                                                                                                                                                      |          | 33.45  |
| Q8TCG1;Q8TCG1-2          | CIP2A_HUMAN Protein CIP2A OS=Homo sapiens GN=KIAA1524 PE=1 SV=2;>sp Q8TCG1-2 CIP2A_HUMAN Isoform 2 of Protein CIP2A OS=Homo sapiens GN=KIAA1524                                                                         | 8.92E-13 |        |
| Q8TCJ2                   | STT3B_HUMAN Dolichyl-diphosphooligosaccharide--protein glycosyltransferase subunit STT3B OS=Homo sapiens GN=STT3B PE=1 SV=1                                                                                             |          | 225.69 |
| Q8TCS8                   | PNPT1_HUMAN Polyribonucleotide nucleotidyltransferase 1, mitochondrial OS=Homo sapiens GN=PNPT1 PE=1 SV=2                                                                                                               |          | 86.6   |
| Q8TCT8                   | PSL2_HUMAN Signal peptide peptidase-like 2A OS=Homo sapiens GN=SPPL2A PE=1 SV=2                                                                                                                                         |          |        |
| Q8TCT9                   | HM13_HUMAN Minor histocompatibility antigen H13 OS=Homo sapiens GN=HM13 PE=1 SV=1                                                                                                                                       |          | 207.19 |
| Q8TCT9-2                 | HM13_HUMAN Isoform 2 of Minor histocompatibility antigen H13 OS=Homo sapiens GN=HM13                                                                                                                                    |          | 176.18 |
| Q8TCT9-4                 | HM13_HUMAN Isoform 4 of Minor histocompatibility antigen H13 OS=Homo sapiens GN=HM13                                                                                                                                    |          | 174.68 |
| Q8TCT9-5                 | HM13_HUMAN Isoform 5 of Minor histocompatibility antigen H13 OS=Homo sapiens GN=HM13                                                                                                                                    |          | 207.19 |
| Q8TCT9;Q8TCT9-5;E1P5L    | HM13_HUMAN Minor histocompatibility antigen H13 OS=Homo sapiens GN=HM13 PE=1 SV=1;>sp Q8TCT9-5 HM13_HUMAN Isoform 5 of Minor histocompatibility antigen H13 OS=Homo sapiens GN=HM13                                     | 4.45E-28 |        |
| Q8TCU4                   | ALMS1_HUMAN Alstrom syndrome protein 1 OS=Homo sapiens GN=ALMS1 PE=1 SV=3                                                                                                                                               |          |        |
| Q8TCU4-2                 | ALMS1_HUMAN Isoform 2 of Alstrom syndrome protein 1 OS=Homo sapiens GN=ALMS1                                                                                                                                            |          |        |
| Q8TCU4-3                 | ALMS1_HUMAN Isoform 3 of Alstrom syndrome protein 1 OS=Homo sapiens GN=ALMS1                                                                                                                                            |          |        |
| Q8TCU4;Q8TCU4-2;Q8TCU4-3 | ALMS1_HUMAN Alstrom syndrome protein 1 OS=Homo sapiens GN=ALMS1 PE=1 SV=3;>sp Q8TCU4-2 ALMS1_HUMAN Isoform 2 of Alstrom syndrome protein 1 OS=Homo sapiens GN=ALMS1                                                     | 3.38E-17 |        |
| Q8TCU6                   | PREX1_HUMAN Phosphatidylinositol 3,4,5-trisphosphate-dependent Rac exchanger 1 protein OS=Homo sapiens GN=PREX1 PE=1 SV=3                                                                                               |          | 25     |
| Q8TCU6-3                 | PREX1_HUMAN Isoform 3 of Phosphatidylinositol 3,4,5-trisphosphate-dependent Rac exchanger 1 protein OS=Homo sapiens GN=PREX1                                                                                            |          | 25     |
| Q8TCU6;Q8TCU6-3          | PREX1_HUMAN Phosphatidylinositol 3,4,5-trisphosphate-dependent Rac exchanger 1 protein OS=Homo sapiens GN=PREX1 PE=1 SV=3                                                                                               | 9.30E-11 |        |
| Q8TCZ2                   | C99L2_HUMAN CD99 antigen-like protein 2 OS=Homo sapiens GN=CD99L2 PE=2 SV=1                                                                                                                                             |          | 30.31  |
| Q8TCZ2-2                 | C99L2_HUMAN Isoform 2 of CD99 antigen-like protein 2 OS=Homo sapiens GN=CD99L2                                                                                                                                          |          | 30.31  |



|                          |                                                                                                                                                                                                                                                                                     |            |        |
|--------------------------|-------------------------------------------------------------------------------------------------------------------------------------------------------------------------------------------------------------------------------------------------------------------------------------|------------|--------|
| Q8TCZ2-3                 | C99L2_HUMAN Isoform 3 of CD99 antigen-like protein 2 OS=Homo sapiens GN=CD99L2                                                                                                                                                                                                      |            | 30.31  |
| Q8TD06                   | AGR3_HUMAN Anterior gradient protein 3 homolog OS=Homo sapiens GN=AGR3 PE=1 SV=1                                                                                                                                                                                                    |            | 23.53  |
| Q8TD07                   | N2DL4_HUMAN NKG2D ligand 4 OS=Homo sapiens GN=RAET1E PE=1 SV=1                                                                                                                                                                                                                      |            | 31.18  |
| Q8TD07-2                 | N2DL4_HUMAN Isoform 2 of NKG2D ligand 4 OS=Homo sapiens GN=RAET1E                                                                                                                                                                                                                   |            | 31.18  |
| Q8TD07-3                 | N2DL4_HUMAN Isoform 3 of NKG2D ligand 4 OS=Homo sapiens GN=RAET1E                                                                                                                                                                                                                   |            | 31.18  |
| Q8TD08;Q8TD08-3;Q8TD08-3 | MK15_HUMAN Mitogen-activated protein kinase 15 OS=Homo sapiens GN=MAPK15 PE=1 SV=1;>sp Q8TD08-3 MK15_HUMAN Isoform 2 of BICD2_HUMAN Isoform 2 of Protein bicaudal D homolog 2 OS=Homo sapiens GN=BICD2;>sp Q8TD16 BICD2_HUMAN Protein bicaudal D homolog 2 OS=Homo sapiens GN=BICD2 | 0.00010541 |        |
| Q8TD16-2;Q8TD16          | 2 BICD2_HUMAN Isoform 2 of Protein bicaudal D homolog 2 OS=Homo sapiens GN=BICD2;>sp Q8TD16 BICD2_HUMAN Protein bicaudal D homolog 2 OS=Homo sapiens GN=BICD2                                                                                                                       | 4.29E-05   |        |
| Q8TD19                   | NEK9_HUMAN Serine/threonine-protein kinase Nek9 OS=Homo sapiens GN=NEK9 PE=1 SV=2                                                                                                                                                                                                   | 2.98E-10   |        |
| Q8TD26                   | CHD6_HUMAN Chromodomain-helicase-DNA-binding protein 6 OS=Homo sapiens GN=CHD6 PE=1 SV=4                                                                                                                                                                                            |            | 74.92  |
| Q8TD26-3                 | CHD6_HUMAN Isoform 3 of Chromodomain-helicase-DNA-binding protein 6 OS=Homo sapiens GN=CHD6                                                                                                                                                                                         |            | 16.08  |
| Q8TD26;Q3L8U1;Q3L8U1-3   | CHD6_HUMAN Chromodomain-helicase-DNA-binding protein 6 OS=Homo sapiens GN=CHD6 PE=1 SV=4;>sp Q3L8U1 CHD9_HUMAN Chromodomain-helicase-DNA-binding protein 6 OS=Homo sapiens GN=CHD9                                                                                                  | 1.12E-08   |        |
| Q8TD30                   | ALAT2_HUMAN Alanine aminotransferase 2 OS=Homo sapiens GN=GPT2 PE=1 SV=1                                                                                                                                                                                                            |            |        |
| Q8TD43                   | TRPM4_HUMAN Transient receptor potential cation channel subfamily M member 4 OS=Homo sapiens GN=TRPM4 PE=1 SV=1                                                                                                                                                                     |            |        |
| Q8TD43-2                 | TRPM4_HUMAN Isoform 2 of Transient receptor potential cation channel subfamily M member 4 OS=Homo sapiens GN=TRPM4                                                                                                                                                                  |            |        |
| Q8TD43-3                 | TRPM4_HUMAN Isoform 3 of Transient receptor potential cation channel subfamily M member 4 OS=Homo sapiens GN=TRPM4                                                                                                                                                                  |            |        |
| Q8TD47                   | RS4Y2_HUMAN 40S ribosomal protein S4, Y isoform 2 OS=Homo sapiens GN=RPS4Y2 PE=1 SV=3                                                                                                                                                                                               |            | 273.32 |
| Q8TD55                   | PKHO2_HUMAN Pleckstrin homology domain-containing family O member 2 OS=Homo sapiens GN=PLEKHO2 PE=1 SV=1                                                                                                                                                                            |            |        |
| Q8TD55-2                 | PKHO2_HUMAN Isoform 2 of Pleckstrin homology domain-containing family O member 2 OS=Homo sapiens GN=PLEKHO2                                                                                                                                                                         |            |        |
| Q8TD55;Q8TD55-2          | PKHO2_HUMAN Pleckstrin homology domain-containing family O member 2 OS=Homo sapiens GN=PLEKHO2 PE=1 SV=1;>sp Q8TD55-2 PKHO2_HUMAN Isoform 2 of Pleckstrin homology domain-containing family O member 2 OS=Homo sapiens GN=PLEKHO2                                                   | 1.68E-07   |        |
| Q8TDB6                   | DTX3L_HUMAN E3 ubiquitin-protein ligase DTX3L OS=Homo sapiens GN=DTX3L PE=1 SV=1                                                                                                                                                                                                    | 1.83E-13   |        |
| Q8TDD1                   | DDX54_HUMAN ATP-dependent RNA helicase DDX54 OS=Homo sapiens GN=DDX54 PE=1 SV=2                                                                                                                                                                                                     |            | 75.24  |
| Q8TDD1-2                 | DDX54_HUMAN Isoform 2 of ATP-dependent RNA helicase DDX54 OS=Homo sapiens GN=DDX54                                                                                                                                                                                                  |            | 60.54  |
| Q8TDD1-2;Q8TDD1-2        | 2 DDX54_HUMAN Isoform 2 of ATP-dependent RNA helicase DDX54 OS=Homo sapiens GN=DDX54;>sp Q8TDD1 DDX54_HUMAN ATP-dependent RNA helicase DDX54 OS=Homo sapiens GN=DDX54                                                                                                               | 1.17E-27   |        |
| Q8TDH9                   | MUTED_HUMAN Protein Muted homolog OS=Homo sapiens GN=MUTED PE=1 SV=1                                                                                                                                                                                                                | 1.79E-08   |        |
| Q8TDI0                   | CHD5_HUMAN Chromodomain-helicase-DNA-binding protein 5 OS=Homo sapiens GN=CHD5 PE=1 SV=1                                                                                                                                                                                            |            | 651.5  |
| Q8TDI8                   | TMC1_HUMAN Transmembrane channel-like protein 1 OS=Homo sapiens GN=TMC1 PE=1 SV=2                                                                                                                                                                                                   |            | 35.08  |
| Q8TDJ6                   | DMXL2_HUMAN DmX-like protein 2 OS=Homo sapiens GN=DMXL2 PE=1 SV=2                                                                                                                                                                                                                   |            | 37.63  |
| Q8TDM6                   | DLG5_HUMAN Disks large homolog 5 OS=Homo sapiens GN=DLG5 PE=1 SV=4                                                                                                                                                                                                                  |            |        |
| Q8TDM6-2                 | DLG5_HUMAN Isoform 2 of Disks large homolog 5 OS=Homo sapiens GN=DLG5                                                                                                                                                                                                               |            |        |
| Q8TDM6-3                 | DLG5_HUMAN Isoform 3 of Disks large homolog 5 OS=Homo sapiens GN=DLG5                                                                                                                                                                                                               |            |        |
| Q8TDM6-4                 | DLG5_HUMAN Isoform 4 of Disks large homolog 5 OS=Homo sapiens GN=DLG5                                                                                                                                                                                                               |            |        |
| Q8TDM6-5                 | DLG5_HUMAN Isoform 5 of Disks large homolog 5 OS=Homo sapiens GN=DLG5                                                                                                                                                                                                               |            |        |
| Q8TDN6                   | BRX1_HUMAN Ribosome biogenesis protein BRX1 homolog OS=Homo sapiens GN=BRX1 PE=1 SV=2                                                                                                                                                                                               |            | 189.93 |
| Q8TDP1                   | RNH2C_HUMAN Ribonuclease H2 subunit C OS=Homo sapiens GN=RNASEH2C PE=1 SV=1                                                                                                                                                                                                         |            | 181.6  |
| Q8TDP1-2                 | RNH2C_HUMAN Isoform 2 of Ribonuclease H2 subunit C OS=Homo sapiens GN=RNASEH2C                                                                                                                                                                                                      |            | 181.6  |
| Q8TDP1;Q8TDP1-2          | RNH2C_HUMAN Ribonuclease H2 subunit C OS=Homo sapiens GN=RNASEH2C PE=1 SV=1;>sp Q8TDP1-2 RNH2C_HUMAN Isoform 2 of Ribonuclease H2 subunit C OS=Homo sapiens GN=RNASEH2C                                                                                                             | 4.33E-45   |        |
| Q8TDQ7;Q8TDQ7-2;Q8TDQ7-2 | GNPI2_HUMAN Glucosamine-6-phosphate isomerase 2 OS=Homo sapiens GN=GNPDA2 PE=1 SV=1;>sp Q8TDQ7-2 GNPI2_HUMAN Isoform 2 of Glucosamine-6-phosphate isomerase 2 OS=Homo sapiens GN=GNPDA2                                                                                             | 5.25E-32   |        |
| Q8TDR0                   | MIPT3_HUMAN TRAF3-interacting protein 1 OS=Homo sapiens GN=TRAF3IP1 PE=1 SV=1                                                                                                                                                                                                       |            |        |
| Q8TDR0-2                 | MIPT3_HUMAN Isoform 2 of TRAF3-interacting protein 1 OS=Homo sapiens GN=TRAF3IP1                                                                                                                                                                                                    |            |        |
| Q8TDT2                   | GP152_HUMAN Probable G-protein coupled receptor 152 OS=Homo sapiens GN=GPR152 PE=2 SV=1                                                                                                                                                                                             |            |        |
| Q8TDX5-2                 | ACMSD_HUMAN Isoform 2 of 2-amino-3-carboxymuconate-6-semialdehyde decarboxylase OS=Homo sapiens GN=ACMSD                                                                                                                                                                            |            |        |
| Q8TDX7                   | NEK7_HUMAN Serine/threonine-protein kinase Nek7 OS=Homo sapiens GN=NEK7 PE=1 SV=1                                                                                                                                                                                                   | 3.18E-08   |        |
| Q8TDZ2;Q8TDZ2-2          | MICA1_HUMAN NEDD9-interacting protein with calponin homology and LIM domains OS=Homo sapiens GN=MICAL1 PE=1 SV=2;>sp Q8TDZ2-2 MICA1_HUMAN NEDD9-interacting protein with calponin homology and LIM domains OS=Homo sapiens GN=MICAL1                                                | 9.23E-12   |        |
| Q8TE56                   | ATS17_HUMAN A disintegrin and metalloproteinase with thrombospondin motifs 17 OS=Homo sapiens GN=ADAMTS17 PE=2 SV=2                                                                                                                                                                 |            | 29.6   |
| Q8TE58                   | ATS15_HUMAN A disintegrin and metalloproteinase with thrombospondin motifs 15 OS=Homo sapiens GN=ADAMTS15 PE=2 SV=1                                                                                                                                                                 |            |        |
| Q8TE68                   | ES8L1_HUMAN Epidermal growth factor receptor kinase substrate 8-like protein 1 OS=Homo sapiens GN=EPS8L1 PE=1 SV=3                                                                                                                                                                  |            |        |
| Q8TE68-2                 | ES8L1_HUMAN Isoform 2 of Epidermal growth factor receptor kinase substrate 8-like protein 1 OS=Homo sapiens GN=EPS8L1                                                                                                                                                               |            |        |
| Q8TE68-3                 | ES8L1_HUMAN Isoform 3 of Epidermal growth factor receptor kinase substrate 8-like protein 1 OS=Homo sapiens GN=EPS8L1                                                                                                                                                               |            |        |
| Q8TE68-4                 | ES8L1_HUMAN Isoform 4 of Epidermal growth factor receptor kinase substrate 8-like protein 1 OS=Homo sapiens GN=EPS8L1                                                                                                                                                               |            |        |
| Q8TE68;Q8TE68-2;Q8TE68-2 | ES8L1_HUMAN Epidermal growth factor receptor kinase substrate 8-like protein 1 OS=Homo sapiens GN=EPS8L1 PE=1 SV=3;>sp Q8TE68-2 ES8L1_HUMAN Isoform 2 of Epidermal growth factor receptor kinase substrate 8-like protein 1 OS=Homo sapiens GN=EPS8L1                               | 1.02E-13   |        |
| Q8TE73                   | DYH5_HUMAN Dynein heavy chain 5, axonemal OS=Homo sapiens GN=DNAH5 PE=1 SV=3                                                                                                                                                                                                        |            | 61.01  |
| Q8TE77;Q8TE77-3;Q8TE77-3 | SSH3_HUMAN Protein phosphatase Slingshot homolog 3 OS=Homo sapiens GN=SSH3 PE=1 SV=2;>sp Q8TE77-3 SSH3_HUMAN Isoform 3 of Protein phosphatase Slingshot homolog 3 OS=Homo sapiens GN=SSH3                                                                                           | 2.43E-25   |        |
| Q8TEA1                   | NSUN6_HUMAN Putative methyltransferase NSUN6 OS=Homo sapiens GN=NSUN6 PE=1 SV=1                                                                                                                                                                                                     |            |        |
| Q8TEA7                   | TBCK_HUMAN TBC domain-containing protein kinase-like protein OS=Homo sapiens GN=TBCK PE=1 SV=4                                                                                                                                                                                      |            | 24.99  |
| Q8TEA7-2                 | TBCK_HUMAN Isoform 2 of TBC domain-containing protein kinase-like protein OS=Homo sapiens GN=TBCK                                                                                                                                                                                   |            | 24.99  |
| Q8TEA7-3                 | TBCK_HUMAN Isoform 3 of TBC domain-containing protein kinase-like protein OS=Homo sapiens GN=TBCK                                                                                                                                                                                   |            | 24.99  |
| Q8TEA8                   | DTD1_HUMAN D-tyrosyl-tRNA(Tyr) deacylase 1 OS=Homo sapiens GN=DTD1 PE=1 SV=2                                                                                                                                                                                                        |            | 114.73 |
| Q8TED0                   | UTP15_HUMAN U3 small nucleolar RNA-associated protein 15 homolog OS=Homo sapiens GN=UTP15 PE=1 SV=3                                                                                                                                                                                 |            |        |
| Q8TED1                   | GPX8_HUMAN Probable glutathione peroxidase 8 OS=Homo sapiens GN=GPX8 PE=1 SV=2                                                                                                                                                                                                      |            | 70.91  |
| Q8TEK3                   | DOT1L_HUMAN Histone-lysine N-methyltransferase, H3 lysine-79 specific OS=Homo sapiens GN=DOT1L PE=1 SV=2                                                                                                                                                                            |            |        |
| Q8TEK3-2                 | DOT1L_HUMAN Isoform 1 of Histone-lysine N-methyltransferase, H3 lysine-79 specific OS=Homo sapiens GN=DOT1L                                                                                                                                                                         |            |        |

|                       |                                                                                                                        |           |        |
|-----------------------|------------------------------------------------------------------------------------------------------------------------|-----------|--------|
| Q8TEM1                | PO210_HUMAN Nuclear pore membrane glycoprotein 210 OS=Homo sapiens GN=NUP210 PE=1 SV=3                                 |           |        |
| Q8TEM1-2              | PO210_HUMAN Isoform 2 of Nuclear pore membrane glycoprotein 210 OS=Homo sapiens GN=NUP210                              |           |        |
| Q8TEM1;Q8TEM1-2       | PO210_HUMAN Nuclear pore membrane glycoprotein 210 OS=Homo sapiens GN=NUP210 PE=1 SV=3;>sp Q8TEM1-2 PO210_HUMAN        | 6.76E-184 |        |
| Q8TEQ6                | GEM15_HUMAN Gem-associated protein 5 OS=Homo sapiens GN=GEMIN5 PE=1 SV=3                                               |           |        |
| Q8TER5                | ARH40_HUMAN Rho guanine nucleotide exchange factor 40 OS=Homo sapiens GN=ARHGEF40 PE=1 SV=3                            |           | 25.94  |
| Q8TER5-2              | ARH40_HUMAN Isoform 2 of Rho guanine nucleotide exchange factor 40 OS=Homo sapiens GN=ARHGEF40                         |           | 25.94  |
| Q8TER5-3              | ARH40_HUMAN Isoform 3 of Rho guanine nucleotide exchange factor 40 OS=Homo sapiens GN=ARHGEF40                         |           | 30.72  |
| Q8TER5-4              | ARH40_HUMAN Isoform 4 of Rho guanine nucleotide exchange factor 40 OS=Homo sapiens GN=ARHGEF40                         |           | 25.94  |
| Q8TES7                | FBF1_HUMAN Fas-binding factor 1 OS=Homo sapiens GN=FBF1 PE=1 SV=2                                                      |           |        |
| Q8TES7-2              | FBF1_HUMAN Isoform 2 of Fas-binding factor 1 OS=Homo sapiens GN=FBF1                                                   |           |        |
| Q8TES7-3              | FBF1_HUMAN Isoform 3 of Fas-binding factor 1 OS=Homo sapiens GN=FBF1                                                   |           |        |
| Q8TES7-4              | FBF1_HUMAN Isoform 4 of Fas-binding factor 1 OS=Homo sapiens GN=FBF1                                                   |           |        |
| Q8TES7-5              | FBF1_HUMAN Isoform 5 of Fas-binding factor 1 OS=Homo sapiens GN=FBF1                                                   |           |        |
| Q8TES7-6              | FBF1_HUMAN Isoform 6 of Fas-binding factor 1 OS=Homo sapiens GN=FBF1                                                   |           |        |
| Q8TEU7;Q8TEU7-3;Q9Y4C | RPGF6_HUMAN Rap guanine nucleotide exchange factor 6 OS=Homo sapiens GN=RAPGEF6 PE=1 SV=2;>sp Q8TEU7-3 RPGF6_HUMAN     | 8.59E-08  |        |
| Q8TEW0                | PARD3_HUMAN Partitioning defective 3 homolog OS=Homo sapiens GN=PARD3 PE=1 SV=2                                        |           |        |
| Q8TEW0-10             | PARD3_HUMAN Isoform 10 of Partitioning defective 3 homolog OS=Homo sapiens GN=PARD3                                    |           |        |
| Q8TEW0-2              | PARD3_HUMAN Isoform 2 of Partitioning defective 3 homolog OS=Homo sapiens GN=PARD3                                     |           |        |
| Q8TEW0-3              | PARD3_HUMAN Isoform 3 of Partitioning defective 3 homolog OS=Homo sapiens GN=PARD3                                     |           |        |
| Q8TEW0-4              | PARD3_HUMAN Isoform 4 of Partitioning defective 3 homolog OS=Homo sapiens GN=PARD3                                     |           |        |
| Q8TEW0-5              | PARD3_HUMAN Isoform 5 of Partitioning defective 3 homolog OS=Homo sapiens GN=PARD3                                     |           |        |
| Q8TEW0-6              | PARD3_HUMAN Isoform 6 of Partitioning defective 3 homolog OS=Homo sapiens GN=PARD3                                     |           |        |
| Q8TEW0-7              | PARD3_HUMAN Isoform 7 of Partitioning defective 3 homolog OS=Homo sapiens GN=PARD3                                     |           |        |
| Q8TEW0-8              | PARD3_HUMAN Isoform 8 of Partitioning defective 3 homolog OS=Homo sapiens GN=PARD3                                     |           |        |
| Q8TEW0-9              | PARD3_HUMAN Isoform 9 of Partitioning defective 3 homolog OS=Homo sapiens GN=PARD3                                     |           |        |
| Q8TEW8-4              | PAR3L_HUMAN Isoform 4 of Partitioning defective 3 homolog B OS=Homo sapiens GN=PAR3B                                   |           |        |
| Q8TEW8;Q8TEW8-2;Q8TE  | PAR3L_HUMAN Partitioning defective 3 homolog B OS=Homo sapiens GN=PAR3B PE=1 SV=2;>sp Q8TEW8-2 PAR3L_HUMAN Isoform     | 1.66E-06  |        |
| Q8TEX9                | IPO4_HUMAN Importin-4 OS=Homo sapiens GN=IPO4 PE=1 SV=2                                                                |           |        |
| Q8TEX9-2              | IPO4_HUMAN Isoform 2 of Importin-4 OS=Homo sapiens GN=IPO4                                                             |           |        |
| Q8TEX9-2;Q8TEX9       | 2 IPO4_HUMAN Isoform 2 of Importin-4 OS=Homo sapiens GN=IPO4;>sp Q8TEX9 IPO4_HUMAN Importin-4 OS=Homo sapiens GN=I     | 3.37E-298 |        |
| Q8TF05;Q8TF05-2       | PP4R1_HUMAN Serine/threonine-protein phosphatase 4 regulatory subunit 1 OS=Homo sapiens GN=PPP4R1 PE=1 SV=1;>sp Q8TF05 | 1.21E-27  |        |
| Q8TF09                | DLRB2_HUMAN Dynein light chain roadblock-type 2 OS=Homo sapiens GN=DYNLRB2 PE=1 SV=1                                   |           | 64.64  |
| Q8TF17                | S3TC2_HUMAN SH3 domain and tetratricopeptide repeats-containing protein 2 OS=Homo sapiens GN=SH3TC2 PE=1 SV=2          |           |        |
| Q8TF42                | UBS3B_HUMAN Ubiquitin-associated and SH3 domain-containing protein B OS=Homo sapiens GN=UBASH3B PE=1 SV=2              |           |        |
| Q8TF46                | DI3L1_HUMAN DIS3-like exonuclease 1 OS=Homo sapiens GN=DIS3L PE=1 SV=2                                                 |           |        |
| Q8TF46-2              | DI3L1_HUMAN Isoform 2 of DIS3-like exonuclease 1 OS=Homo sapiens GN=DIS3L                                              |           |        |
| Q8TF46-4              | DI3L1_HUMAN Isoform 4 of DIS3-like exonuclease 1 OS=Homo sapiens GN=DIS3L                                              |           |        |
| Q8TF64                | GIPC3_HUMAN PDZ domain-containing protein GIPC3 OS=Homo sapiens GN=GIPC3 PE=2 SV=1                                     |           |        |
| Q8TF65                | GIPC2_HUMAN PDZ domain-containing protein GIPC2 OS=Homo sapiens GN=GIPC2 PE=1 SV=1                                     |           | 64.62  |
| Q8TF66                | LRC15_HUMAN Leucine-rich repeat-containing protein 15 OS=Homo sapiens GN=LRR15 PE=1 SV=2                               |           |        |
| Q8TF66-2              | LRC15_HUMAN Isoform 2 of Leucine-rich repeat-containing protein 15 OS=Homo sapiens GN=LRR15                            |           |        |
| Q8TF66-2;Q8TF66       | 2 LRC15_HUMAN Isoform 2 of Leucine-rich repeat-containing protein 15 OS=Homo sapiens GN=LRR15;>sp Q8TF66 LRC15_HUMAN   | 1.03E-109 |        |
| Q8TF72                | SHRM3_HUMAN Protein Shroom3 OS=Homo sapiens GN=SHROOM3 PE=1 SV=2                                                       | 1.72E-05  |        |
| Q8TF74                | WIPF2_HUMAN WAS/WASL-interacting protein family member 2 OS=Homo sapiens GN=WIPF2 PE=1 SV=1                            |           | 157.65 |
| Q8TF74-2              | WIPF2_HUMAN Isoform 2 of WAS/WASL-interacting protein family member 2 OS=Homo sapiens GN=WIPF2                         |           | 86.26  |
| Q8WTS6                | SETD7_HUMAN Histone-lysine N-methyltransferase SETD7 OS=Homo sapiens GN=SETD7 PE=1 SV=1                                | 1.36E-13  |        |
| Q8WTT2                | NOC3L_HUMAN Nucleolar complex protein 3 homolog OS=Homo sapiens GN=NOC3L PE=1 SV=1                                     |           | 24.49  |
| Q8WTV1                | THAP3_HUMAN THAP domain-containing protein 3 OS=Homo sapiens GN=THAP3 PE=2 SV=1                                        |           |        |
| Q8WTV1-3              | THAP3_HUMAN Isoform 2 of THAP domain-containing protein 3 OS=Homo sapiens GN=THAP3                                     |           |        |
| Q8WTW3                | COG1_HUMAN Conserved oligomeric Golgi complex subunit 1 OS=Homo sapiens GN=COG1 PE=1 SV=1                              | 2.86E-22  |        |
| Q8WU03                | GLYL2_HUMAN Glycine N-acyltransferase-like protein 2 OS=Homo sapiens GN=GLYATL2 PE=2 SV=1                              | 1.80E-10  |        |
| Q8WU39;Q8WU39-3       | PERP1_HUMAN Plasma cell-induced resident endoplasmic reticulum protein OS=Homo sapiens GN=PACAP PE=1 SV=1;>sp Q8WU39-3 | 1.25E-247 |        |
| Q8WU68                | U2AF4_HUMAN Splicing factor U2AF 26 kDa subunit OS=Homo sapiens GN=U2AF1L4 PE=1 SV=2                                   |           | 44.17  |
| Q8WU68-2              | U2AF4_HUMAN Isoform 2 of Splicing factor U2AF 26 kDa subunit OS=Homo sapiens GN=U2AF1L4                                |           | 44.17  |
| Q8WU68-3              | U2AF4_HUMAN Isoform 3 of Splicing factor U2AF 26 kDa subunit OS=Homo sapiens GN=U2AF1L4                                |           | 44.17  |
| Q8WU68;Q8WU68-2;Q8W   | U2AF4_HUMAN Splicing factor U2AF 26 kDa subunit OS=Homo sapiens GN=U2AF1L4 PE=1 SV=2;>sp Q8WU68-2 U2AF4_HUMAN Isof     | 1.84E-35  |        |
| Q8WU76                | SCFD2_HUMAN Sec1 family domain-containing protein 2 OS=Homo sapiens GN=SCFD2 PE=1 SV=2                                 |           |        |
| Q8WU76-2              | SCFD2_HUMAN Isoform 2 of Sec1 family domain-containing protein 2 OS=Homo sapiens GN=SCFD2                              |           |        |
| Q8WU90                | ZC3HF_HUMAN Zinc finger CCCH domain-containing protein 15 OS=Homo sapiens GN=ZC3H15 PE=1 SV=1                          |           | 163.12 |
| Q8WUA2                | PPIL4_HUMAN Peptidyl-prolyl cis-trans isomerase-like 4 OS=Homo sapiens GN=PPIL4 PE=1 SV=1                              |           | 23.85  |
| Q8WUA4                | TF3C2_HUMAN General transcription factor 3C polypeptide 2 OS=Homo sapiens GN=GTF3C2 PE=1 SV=2                          |           |        |

|                     |                                                                                                                         |          |        |
|---------------------|-------------------------------------------------------------------------------------------------------------------------|----------|--------|
| Q8WUA4-2            | TF3C2_HUMAN Isoform 2 of General transcription factor 3C polypeptide 2 OS=Homo sapiens GN=GTF3C2                        |          |        |
| Q8WUD1              | RAB2B_HUMAN Ras-related protein Rab-2B OS=Homo sapiens GN=RAB2B PE=1 SV=1                                               |          | 415.83 |
| Q8WUF5              | IASPP_HUMAN RelA-associated inhibitor OS=Homo sapiens GN=PPP1R13L PE=1 SV=4                                             | 2.95E-22 |        |
| Q8WUH6              | CL023_HUMAN UPF0444 transmembrane protein C12orf23 OS=Homo sapiens GN=C12orf23 PE=1 SV=1                                |          | 53.73  |
| Q8WUK0              | PTPM1_HUMAN Protein-tyrosine phosphatase mitochondrial 1 OS=Homo sapiens GN=PTPMT1 PE=1 SV=1                            |          | 19.1   |
| Q8WUK0-2            | PTPM1_HUMAN Isoform 2 of Protein-tyrosine phosphatase mitochondrial 1 OS=Homo sapiens GN=PTPMT1                         |          | 19.1   |
| Q8WUK0;Q8WUK0-2     | PTPM1_HUMAN Protein-tyrosine phosphatase mitochondrial 1 OS=Homo sapiens GN=PTPMT1 PE=1 SV=1;>sp Q8WUK0-2 PTPM1_HU      | 4.34E-09 |        |
| Q8WUM0              | NU133_HUMAN Nuclear pore complex protein Nup133 OS=Homo sapiens GN=NUP133 PE=1 SV=2                                     |          |        |
| Q8WUM4              | PDC6I_HUMAN Programmed cell death 6-interacting protein OS=Homo sapiens GN=PDCD6IP PE=1 SV=1                            |          | 190.43 |
| Q8WUP2-2;Q8WUP2;Q8W | 2 FBLI1_HUMAN Isoform 2 of Filamin-binding LIM protein 1 OS=Homo sapiens GN=FBLIM1;>sp Q8WUP2 FBLI1_HUMAN Filamin-bindi | 7.54E-17 |        |
| Q8WUP2;Q8WUP2-3     | FBLI1_HUMAN Filamin-binding LIM protein 1 OS=Homo sapiens GN=FBLIM1 PE=1 SV=2;>sp Q8WUP2-3 FBLI1_HUMAN Isoform 3 of I   | 5.27E-05 |        |
| Q8WUW1              | BRK1_HUMAN Protein BRICK1 OS=Homo sapiens GN=BRK1 PE=1 SV=1                                                             |          | 36.14  |
| Q8WUW1-2            | BRK1_HUMAN Isoform 2 of Protein BRICK1 OS=Homo sapiens GN=BRK1                                                          |          | 36.14  |
| Q8WUX9              | CHMP7_HUMAN Charged multivesicular body protein 7 OS=Homo sapiens GN=CHMP7 PE=1 SV=1                                    | 5.34E-10 |        |
| Q8WUY1              | CH055_HUMAN UPF0670 protein C8orf55 OS=Homo sapiens GN=C8orf55 PE=1 SV=2                                                |          | 47.08  |
| Q8WUZ0              | BCL7C_HUMAN B-cell CLL/lymphoma 7 protein family member C OS=Homo sapiens GN=BCL7C PE=1 SV=3                            |          |        |
| Q8WUZ0-2            | BCL7C_HUMAN Isoform 2 of B-cell CLL/lymphoma 7 protein family member C OS=Homo sapiens GN=BCL7C                         |          |        |
| Q8WV22              | NSE1_HUMAN Non-structural maintenance of chromosomes element 1 homolog OS=Homo sapiens GN=NSMCE1 PE=1 SV=5              |          | 24.93  |
| Q8WV24              | PHLA1_HUMAN Pleckstrin homology-like domain family A member 1 OS=Homo sapiens GN=PHLDA1 PE=1 SV=4                       |          | 70.85  |
| Q8WV28              | BLNK_HUMAN B-cell linker protein OS=Homo sapiens GN=BLNK PE=1 SV=2                                                      |          |        |
| Q8WV28-2            | BLNK_HUMAN Isoform 2 of B-cell linker protein OS=Homo sapiens GN=BLNK                                                   |          |        |
| Q8WV92              | MITD1_HUMAN MIT domain-containing protein 1 OS=Homo sapiens GN=MITD1 PE=1 SV=1                                          |          |        |
| Q8WV99              | ZFN2B_HUMAN AN1-type zinc finger protein 2B OS=Homo sapiens GN=ZFAND2B PE=1 SV=1                                        |          |        |
| Q8WV99-2            | ZFN2B_HUMAN Isoform 2 of AN1-type zinc finger protein 2B OS=Homo sapiens GN=ZFAND2B                                     |          |        |
| Q8WVB6-2;Q8WVB6;Q8W | 2 CTF18_HUMAN Isoform 2 of Chromosome transmission fidelity protein 18 homolog OS=Homo sapiens GN=CHTF18;>sp Q8WVB6 CT  | 2.82E-06 |        |
| Q8WVC0              | LEO1_HUMAN RNA polymerase-associated protein LEO1 OS=Homo sapiens GN=LEO1 PE=1 SV=1                                     |          | 32.52  |
| Q8WVC0-2            | LEO1_HUMAN Isoform 2 of RNA polymerase-associated protein LEO1 OS=Homo sapiens GN=LEO1                                  |          | 32.52  |
| Q8WVC0;B4DNM0;Q8WVC | LEO1_HUMAN RNA polymerase-associated protein LEO1 OS=Homo sapiens GN=LEO1 PE=1 SV=1;>tr B4DNM0 B4DNM0_HUMAN cDN.        | 7.51E-10 |        |
| Q8WVC6              | DCAKD_HUMAN Dephospho-CoA kinase domain-containing protein OS=Homo sapiens GN=DCAKD PE=1 SV=1                           | 8.48E-10 |        |
| Q8WVIO              | CC078_HUMAN UPF0640 protein C3orf78 OS=Homo sapiens GN=C3orf78 PE=2 SV=2                                                |          |        |
| Q8WVJ2              | NUDC2_HUMAN NudC domain-containing protein 2 OS=Homo sapiens GN=NUDC2 PE=1 SV=1                                         |          | 91.38  |
| Q8WVJ9              | TWST2_HUMAN Twist-related protein 2 OS=Homo sapiens GN=TWIST2 PE=1 SV=1                                                 |          |        |
| Q8WVK2              | SNR27_HUMAN U4/U6.U5 small nuclear ribonucleoprotein 27 kDa protein OS=Homo sapiens GN=SNRNP27 PE=1 SV=1                |          | 40.92  |
| Q8WVK7;P0CB44       | SKA2_HUMAN Spindle and kinetochore-associated protein 2 OS=Homo sapiens GN=SKA2 PE=1 SV=1;>sp P0CB44 SKA2L_HUMAN Pu     | 9.45E-06 |        |
| Q8WVM0              | TFB1M_HUMAN Dimethyladenosine transferase 1, mitochondrial OS=Homo sapiens GN=TFB1M PE=1 SV=1                           |          | 38.17  |
| Q8WVM7              | STAG1_HUMAN Cohesin subunit SA-1 OS=Homo sapiens GN=STAG1 PE=1 SV=3                                                     |          |        |
| Q8WVM8              | SCFD1_HUMAN Sec1 family domain-containing protein 1 OS=Homo sapiens GN=SCFD1 PE=1 SV=4                                  |          | 178.73 |
| Q8WVQ1              | CANT1_HUMAN Soluble calcium-activated nucleotidase 1 OS=Homo sapiens GN=CANT1 PE=1 SV=1                                 |          |        |
| Q8WVQ1-2            | CANT1_HUMAN Isoform 2 of Soluble calcium-activated nucleotidase 1 OS=Homo sapiens GN=CANT1                              |          |        |
| Q8WVQ1;B4DJ54;Q8WVQ | CANT1_HUMAN Soluble calcium-activated nucleotidase 1 OS=Homo sapiens GN=CANT1 PE=1 SV=1;>tr B4DJ54 B4DJ54_HUMAN cDN     | 4.62E-06 |        |
| Q8WVR3              | CG043_HUMAN Uncharacterized protein C7orf43 OS=Homo sapiens GN=C7orf43 PE=1 SV=2                                        |          |        |
| Q8WVR3-2            | CG043_HUMAN Isoform 2 of Uncharacterized protein C7orf43 OS=Homo sapiens GN=C7orf43                                     |          |        |
| Q8WVR3-3            | CG043_HUMAN Isoform 3 of Uncharacterized protein C7orf43 OS=Homo sapiens GN=C7orf43                                     |          |        |
| Q8WVV4              | POF1B_HUMAN Protein POF1B OS=Homo sapiens GN=POF1B PE=1 SV=3                                                            |          |        |
| Q8WVV4-1            | POF1B_HUMAN Isoform 1 of Protein POF1B OS=Homo sapiens GN=POF1B                                                         |          |        |
| Q8WVV4-3            | POF1B_HUMAN Isoform 3 of Protein POF1B OS=Homo sapiens GN=POF1B                                                         |          |        |
| Q8WVV9              | HNRLI_HUMAN Heterogeneous nuclear ribonucleoprotein L-like OS=Homo sapiens GN=HNRLI PE=1 SV=1                           |          | 184.71 |
| Q8WVV9-2            | HNRLI_HUMAN Isoform 2 of Heterogeneous nuclear ribonucleoprotein L-like OS=Homo sapiens GN=HNRLI                        |          | 145.4  |
| Q8WVV9-3            | HNRLI_HUMAN Isoform 3 of Heterogeneous nuclear ribonucleoprotein L-like OS=Homo sapiens GN=HNRLI                        |          | 117.87 |
| Q8WVV9-4            | HNRLI_HUMAN Isoform 4 of Heterogeneous nuclear ribonucleoprotein L-like OS=Homo sapiens GN=HNRLI                        |          | 184.71 |
| Q8WVV9;Q8WVV9-4     | HNRLI_HUMAN Heterogeneous nuclear ribonucleoprotein L-like OS=Homo sapiens GN=HNRLI PE=1 SV=1;>sp Q8WVV9-4 HNRLI_H      | 1.10E-15 |        |
| Q8WVX9              | FACR1_HUMAN Fatty acyl-CoA reductase 1 OS=Homo sapiens GN=FAR1 PE=1 SV=1                                                |          | 22.6   |
| Q8WVY7              | UBCP1_HUMAN Ubiquitin-like domain-containing CTD phosphatase 1 OS=Homo sapiens GN=UBLCP1 PE=1 SV=2                      |          | 31.76  |
| Q8WW01              | SEN15_HUMAN tRNA-splicing endonuclease subunit Sen15 OS=Homo sapiens GN=TSEN15 PE=1 SV=1                                | 4.43E-87 |        |
| Q8WW12              | PCNP_HUMAN PEST proteolytic signal-containing nuclear protein OS=Homo sapiens GN=PCNP PE=1 SV=2                         |          | 166.64 |
| Q8WW12-2            | PCNP_HUMAN Isoform 2 of PEST proteolytic signal-containing nuclear protein OS=Homo sapiens GN=PCNP                      |          | 121.29 |
| Q8WW12-3            | PCNP_HUMAN Isoform 3 of PEST proteolytic signal-containing nuclear protein OS=Homo sapiens GN=PCNP                      |          | 45.35  |
| Q8WW12;Q8WW12-2     | PCNP_HUMAN PEST proteolytic signal-containing nuclear protein OS=Homo sapiens GN=PCNP PE=1 SV=2;>sp Q8WW12-2 PCNP_HU    | 7.71E-49 |        |
| Q8WW22              | DNJA4_HUMAN DnaJ homolog subfamily A member 4 OS=Homo sapiens GN=DNAJA4 PE=1 SV=1                                       |          | 30.88  |
| Q8WW22-2            | DNJA4_HUMAN Isoform 2 of DnaJ homolog subfamily A member 4 OS=Homo sapiens GN=DNAJA4                                    |          | 33.08  |
| Q8WW22-2;Q8WW22     | 2 DNJA4_HUMAN Isoform 2 of DnaJ homolog subfamily A member 4 OS=Homo sapiens GN=DNAJA4;>sp Q8WW22 DNJA4_HUMAN D         | 2.80E-16 |        |

|                     |                                                                                                                          |           |        |
|---------------------|--------------------------------------------------------------------------------------------------------------------------|-----------|--------|
| Q8WW59              | SPRY4_HUMAN SPRY domain-containing protein 4 OS=Homo sapiens GN=SPRYD4 PE=1 SV=2                                         | 2.48E-09  |        |
| Q8WWA1;Q8WWA1-2     | TMM40_HUMAN Transmembrane protein 40 OS=Homo sapiens GN=TMEM40 PE=1 SV=2;>sp Q8WWA1-2 TMM40_HUMAN Isoform 2 o            | 9.76E-50  |        |
| Q8WWC4              | CB047_HUMAN Uncharacterized protein C2orf47, mitochondrial OS=Homo sapiens GN=C2orf47 PE=1 SV=1                          |           |        |
| Q8WWI1              | LMO7_HUMAN LIM domain only protein 7 OS=Homo sapiens GN=LMO7 PE=1 SV=3                                                   |           | 138.98 |
| Q8WWI1-2            | LMO7_HUMAN Isoform 2 of LIM domain only protein 7 OS=Homo sapiens GN=LMO7                                                |           | 138.98 |
| Q8WWI1-3            | LMO7_HUMAN Isoform 3 of LIM domain only protein 7 OS=Homo sapiens GN=LMO7                                                |           | 129.42 |
| Q8WWI1-4            | LMO7_HUMAN Isoform 4 of LIM domain only protein 7 OS=Homo sapiens GN=LMO7                                                |           | 138.98 |
| Q8WWI1;Q8WWI1-2;Q8W | LMO7_HUMAN LIM domain only protein 7 OS=Homo sapiens GN=LMO7 PE=1 SV=3;>sp Q8WWI1-2 LMO7_HUMAN Isoform 2 of LIM d        | 6.33E-06  |        |
| Q8WWI5              | CTL1_HUMAN Choline transporter-like protein 1 OS=Homo sapiens GN=SLC44A1 PE=1 SV=1                                       |           |        |
| Q8WWI5-2            | CTL1_HUMAN Isoform 2 of Choline transporter-like protein 1 OS=Homo sapiens GN=SLC44A1                                    |           |        |
| Q8WWI5-3            | CTL1_HUMAN Isoform 3 of Choline transporter-like protein 1 OS=Homo sapiens GN=SLC44A1                                    |           |        |
| Q8WWI5;Q8WWI5-2;Q8W | CTL1_HUMAN Choline transporter-like protein 1 OS=Homo sapiens GN=SLC44A1 PE=1 SV=1;>sp Q8WWI5-2 CTL1_HUMAN Isoform 2     | 7.75E-10  |        |
| Q8WWK9;Q8WWK9-3     | CKAP2_HUMAN Cytoskeleton-associated protein 2 OS=Homo sapiens GN=CKAP2 PE=1 SV=1;>sp Q8WWK9-3 CKAP2_HUMAN Isoform r      | 2.04E-07  |        |
| Q8WWM7              | ATX2L_HUMAN Ataxin-2-like protein OS=Homo sapiens GN=ATXN2L PE=1 SV=2                                                    |           | 494.78 |
| Q8WWM7-2            | ATX2L_HUMAN Isoform 2 of Ataxin-2-like protein OS=Homo sapiens GN=ATXN2L                                                 |           | 443.57 |
| Q8WWM7-3            | ATX2L_HUMAN Isoform 3 of Ataxin-2-like protein OS=Homo sapiens GN=ATXN2L                                                 |           | 450.23 |
| Q8WWM7-3;Q8WWM7;Q6  | 3 ATX2L_HUMAN Isoform 3 of Ataxin-2-like protein OS=Homo sapiens GN=ATXN2L;>sp Q8WWM7 ATX2L_HUMAN Ataxin-2-like protei   | 4.61E-25  |        |
| Q8WWM7-4            | ATX2L_HUMAN Isoform 4 of Ataxin-2-like protein OS=Homo sapiens GN=ATXN2L                                                 |           | 443.57 |
| Q8WWM7-5            | ATX2L_HUMAN Isoform 5 of Ataxin-2-like protein OS=Homo sapiens GN=ATXN2L                                                 |           | 443.57 |
| Q8WWM7-6            | ATX2L_HUMAN Isoform 6 of Ataxin-2-like protein OS=Homo sapiens GN=ATXN2L                                                 |           | 443.57 |
| Q8WWM7-7            | ATX2L_HUMAN Isoform 7 of Ataxin-2-like protein OS=Homo sapiens GN=ATXN2L                                                 |           | 73.39  |
| Q8WWM9              | CYGB_HUMAN Cytochrome b OS=Homo sapiens GN=CYGB PE=1 SV=1                                                                | 1.68E-15  |        |
| Q8WWN8              | ARAP3_HUMAN Arf-GAP with Rho-GAP domain, ANK repeat and PH domain-containing protein 3 OS=Homo sapiens GN=ARAP3 PE=1 S   | 1.74E-11  |        |
| Q8WWP7              | GIMA1_HUMAN GTPase IMAP family member 1 OS=Homo sapiens GN=GIMAP1 PE=1 SV=1                                              | 2.90E-08  |        |
| Q8WWQ0              | PHIP_HUMAN PH-interacting protein OS=Homo sapiens GN=PHIP PE=1 SV=2                                                      |           |        |
| Q8WWW0;Q8WWW0-4;Q8  | RASF5_HUMAN Ras association domain-containing protein 5 OS=Homo sapiens GN=RASSF5 PE=1 SV=1;>sp Q8WWW0-4 RASF5_HUI       | 1.60E-06  |        |
| Q8WWX9              | SELM_HUMAN Selenoprotein M OS=Homo sapiens GN=SELM PE=1 SV=3                                                             | 1.26E-08  |        |
| Q8WWY3              | PRP31_HUMAN U4/U6 small nuclear ribonucleoprotein Prp31 OS=Homo sapiens GN=PRPF31 PE=1 SV=2                              |           | 171.77 |
| Q8WWY3-2            | PRP31_HUMAN Isoform 2 of U4/U6 small nuclear ribonucleoprotein Prp31 OS=Homo sapiens GN=PRPF31                           |           | 96.09  |
| Q8WWY3-3            | PRP31_HUMAN Isoform 3 of U4/U6 small nuclear ribonucleoprotein Prp31 OS=Homo sapiens GN=PRPF31                           |           | 96.09  |
| Q8WWY3;B4DWW8;Q8W   | PRP31_HUMAN U4/U6 small nuclear ribonucleoprotein Prp31 OS=Homo sapiens GN=PRPF31 PE=1 SV=2;>tr B4DWW8 B4DWW8_HUM        | 1.95E-165 |        |
| Q8WX92              | NELFB_HUMAN Negative elongation factor B OS=Homo sapiens GN=COBRA1 PE=1 SV=1                                             |           | 111.49 |
| Q8WX93;Q8WX93-3;Q8W | PALLD_HUMAN Palladin OS=Homo sapiens GN=PALLD PE=1 SV=3;>sp Q8WX93-3 PALLD_HUMAN Isoform 3 of Palladin OS=Homo sa        | 1.09E-103 |        |
| Q8WXA3;Q8WXA3-3;Q8W | RUFY2_HUMAN RUN and FYVE domain-containing protein 2 OS=Homo sapiens GN=RUFY2 PE=1 SV=2;>sp Q8WXA3-3 RUFY2_HUMAN         | 3.25E-05  |        |
| Q8WXA9-2            | SREK1_HUMAN Isoform 2 of Splicing regulatory glutamine/lysine-rich protein 1 OS=Homo sapiens GN=SREK1                    |           | 65.63  |
| Q8WXA9-2;B3KRJ9;Q8W | 2 SFR12_HUMAN Isoform 2 of Splicing factor, arginine/serine-rich 12 OS=Homo sapiens GN=SFRS12;>tr B3KRJ9 B3KRJ9_HUMAN cD | 2.87E-58  |        |
| Q8WXA9-2;Q8WXA9     | 2 SREK1_HUMAN Isoform 2 of Splicing regulatory glutamine/lysine-rich protein 1 OS=Homo sapiens GN=SREK1;>sp Q8WXA9 SREK1 | 1.42E-12  |        |
| Q8WXB1              | MT21A_HUMAN Methyltransferase-like protein 21A OS=Homo sapiens GN=METTL21A PE=2 SV=2                                     |           |        |
| Q8WXD0              | RXFP2_HUMAN Relaxin receptor 2 OS=Homo sapiens GN=RXFP2 PE=1 SV=1                                                        |           |        |
| Q8WXE0              | CSKI2_HUMAN Caskin-2 OS=Homo sapiens GN=CASKIN2 PE=1 SV=2                                                                |           |        |
| Q8WXE0-2            | CSKI2_HUMAN Isoform 2 of Caskin-2 OS=Homo sapiens GN=CASKIN2                                                             |           |        |
| Q8WXE1              | ATRIP_HUMAN ATR-interacting protein OS=Homo sapiens GN=ATRIP PE=1 SV=1                                                   |           |        |
| Q8WXE1-2            | ATRIP_HUMAN Isoform 2 of ATR-interacting protein OS=Homo sapiens GN=ATRIP                                                |           |        |
| Q8WXE1-3            | ATRIP_HUMAN Isoform 3 of ATR-interacting protein OS=Homo sapiens GN=ATRIP                                                |           |        |
| Q8WXE1;Q8WXE1-2     | ATRIP_HUMAN ATR-interacting protein OS=Homo sapiens GN=ATRIP PE=1 SV=1;>sp Q8WXE1-2 ATRIP_HUMAN Isoform 2 of ATR-inte    | 8.87E-13  |        |
| Q8WXF0              | SRS12_HUMAN Serine/arginine-rich splicing factor 12 OS=Homo sapiens GN=SRSF12 PE=1 SV=1                                  |           | 42.13  |
| Q8WXF1              | PSPC1_HUMAN Paraspeckle component 1 OS=Homo sapiens GN=PSPC1 PE=1 SV=1                                                   |           | 317.66 |
| Q8WXF1-2            | PSPC1_HUMAN Isoform 2 of Paraspeckle component 1 OS=Homo sapiens GN=PSPC1                                                |           | 317.66 |
| Q8WXF1;B4DWI8;Q8W   | PSPC1_HUMAN Paraspeckle component 1 OS=Homo sapiens GN=PSPC1 PE=1 SV=1;>tr B4DWI8 B4DWI8_HUMAN cDNA FLJ57805, h          | 8.68E-99  |        |
| Q8WXH0              | SYNE2_HUMAN Nesprin-2 OS=Homo sapiens GN=SYNE2 PE=1 SV=3                                                                 |           | 143.97 |
| Q8WXH0-2            | SYNE2_HUMAN Isoform 2 of Nesprin-2 OS=Homo sapiens GN=SYNE2                                                              |           | 143.97 |
| Q8WXH0-2;Q8WXH0     | 2 SYNE2_HUMAN Isoform 2 of Nesprin-2 OS=Homo sapiens GN=SYNE2;>sp Q8WXH0 SYNE2_HUMAN Nesprin-2 OS=Homo sapiens G         | 2.11E-07  |        |
| Q8WXH0-3            | SYNE2_HUMAN Isoform 3 of Nesprin-2 OS=Homo sapiens GN=SYNE2                                                              |           | 8.4    |
| Q8WXH0-4            | SYNE2_HUMAN Isoform 4 of Nesprin-2 OS=Homo sapiens GN=SYNE2                                                              |           | 8.4    |
| Q8WXH0-5            | SYNE2_HUMAN Isoform 5 of Nesprin-2 OS=Homo sapiens GN=SYNE2                                                              |           | 0.51   |
| Q8WXH0-6            | SYNE2_HUMAN Isoform 6 of Nesprin-2 OS=Homo sapiens GN=SYNE2                                                              |           | 0.51   |
| Q8WXH0-7            | SYNE2_HUMAN Isoform 7 of Nesprin-2 OS=Homo sapiens GN=SYNE2                                                              |           | 10.3   |
| Q8WXH0-8            | SYNE2_HUMAN Isoform 8 of Nesprin-2 OS=Homo sapiens GN=SYNE2                                                              |           |        |
| Q8WXH0-9            | SYNE2_HUMAN Isoform 9 of Nesprin-2 OS=Homo sapiens GN=SYNE2                                                              |           |        |
| Q8WXI2              | CNKR2_HUMAN Connector enhancer of kinase suppressor of ras 2 OS=Homo sapiens GN=CNKSR2 PE=1 SV=1                         |           |        |
| Q8WXI2-2            | CNKR2_HUMAN Isoform 2 of Connector enhancer of kinase suppressor of ras 2 OS=Homo sapiens GN=CNKSR2                      |           |        |

|                       |                                                                                                                        |            |        |
|-----------------------|------------------------------------------------------------------------------------------------------------------------|------------|--------|
| Q8WXI9                | P66B_HUMAN Transcriptional repressor p66-beta OS=Homo sapiens GN=GATAD2B PE=1 SV=1                                     |            |        |
| Q8WXR4                | MYO3B_HUMAN Myosin-IIIb OS=Homo sapiens GN=MYO3B PE=2 SV=4                                                             |            | 48.9   |
| Q8WXR4-2              | MYO3B_HUMAN Isoform 2 of Myosin-IIIb OS=Homo sapiens GN=MYO3B                                                          |            | 48.72  |
| Q8WXR4-3              | MYO3B_HUMAN Isoform 3 of Myosin-IIIb OS=Homo sapiens GN=MYO3B                                                          |            | 40.81  |
| Q8WXR4-4              | MYO3B_HUMAN Isoform 4 of Myosin-IIIb OS=Homo sapiens GN=MYO3B                                                          |            | 40.99  |
| Q8WXR4-5              | MYO3B_HUMAN Isoform 5 of Myosin-IIIb OS=Homo sapiens GN=MYO3B                                                          |            | 48.72  |
| Q8WXR4-6              | MYO3B_HUMAN Isoform 6 of Myosin-IIIb OS=Homo sapiens GN=MYO3B                                                          |            | 48.72  |
| Q8WXR4-7              | MYO3B_HUMAN Isoform 7 of Myosin-IIIb OS=Homo sapiens GN=MYO3B                                                          |            | 48.9   |
| Q8WXX5                | DNJC9_HUMAN DnaJ homolog subfamily C member 9 OS=Homo sapiens GN=DNAJC9 PE=1 SV=1                                      |            | 58.56  |
| Q8WXX7                | AUTS2_HUMAN Autism susceptibility gene 2 protein OS=Homo sapiens GN=AUTS2 PE=1 SV=1                                    |            |        |
| Q8WXX7-2              | AUTS2_HUMAN Isoform Short of Autism susceptibility gene 2 protein OS=Homo sapiens GN=AUTS2                             |            |        |
| Q8WY21-2              | SORC1_HUMAN Isoform 2 of VPS10 domain-containing receptor SorCS1 OS=Homo sapiens GN=SORCS1                             |            |        |
| Q8WY21-3              | SORC1_HUMAN Isoform 3 of VPS10 domain-containing receptor SorCS1 OS=Homo sapiens GN=SORCS1                             |            |        |
| Q8WY22                | BRI3B_HUMAN BRI3-binding protein OS=Homo sapiens GN=BRI3BP PE=1 SV=1                                                   |            | 74.98  |
| Q8WYA1-3              | BMAL2_HUMAN Isoform 3 of Aryl hydrocarbon receptor nuclear translocator-like protein 2 OS=Homo sapiens GN=ARNTL2       |            |        |
| Q8WYA1-4              | BMAL2_HUMAN Isoform 4 of Aryl hydrocarbon receptor nuclear translocator-like protein 2 OS=Homo sapiens GN=ARNTL2       |            |        |
| Q8WYA1-5              | BMAL2_HUMAN Isoform 5 of Aryl hydrocarbon receptor nuclear translocator-like protein 2 OS=Homo sapiens GN=ARNTL2       |            |        |
| Q8WYA1-6              | BMAL2_HUMAN Isoform 6 of Aryl hydrocarbon receptor nuclear translocator-like protein 2 OS=Homo sapiens GN=ARNTL2       |            |        |
| Q8WYA1-8              | BMAL2_HUMAN Isoform 8 of Aryl hydrocarbon receptor nuclear translocator-like protein 2 OS=Homo sapiens GN=ARNTL2       |            |        |
| Q8WYA6                | CTBL1_HUMAN Beta-catenin-like protein 1 OS=Homo sapiens GN=CTNNBL1 PE=1 SV=1                                           |            | 92.91  |
| Q8WYA6-2              | CTBL1_HUMAN Isoform 2 of Beta-catenin-like protein 1 OS=Homo sapiens GN=CTNNBL1                                        |            | 90     |
| Q8WYA6-3              | CTBL1_HUMAN Isoform 3 of Beta-catenin-like protein 1 OS=Homo sapiens GN=CTNNBL1                                        |            | 90     |
| Q8WYA6;Q8WYA6-2;Q8W   | CTBL1_HUMAN Beta-catenin-like protein 1 OS=Homo sapiens GN=CTNNBL1 PE=1 SV=1;>sp Q8WYA6-2 CTBL1_HUMAN Isoform 2 of     | 6.05E-33   |        |
| Q8WYH8                | ING5_HUMAN Inhibitor of growth protein 5 OS=Homo sapiens GN=ING5 PE=1 SV=1                                             |            | 36.78  |
| Q8WYH8-2              | ING5_HUMAN Isoform 2 of Inhibitor of growth protein 5 OS=Homo sapiens GN=ING5                                          |            | 36.78  |
| Q8WYJ6                | SEPT1_HUMAN Septin-1 OS=Homo sapiens GN=SEPT1 PE=1 SV=2                                                                |            | 55.86  |
| Q8WYJ6-2              | SEPT1_HUMAN Isoform 2 of Septin-1 OS=Homo sapiens GN=SEPT1                                                             |            | 14.9   |
| Q8WYP5                | ELYS_HUMAN Protein ELYS OS=Homo sapiens GN=AHCTF1 PE=1 SV=3                                                            |            |        |
| Q8WYP5-2              | ELYS_HUMAN Isoform 2 of Protein ELYS OS=Homo sapiens GN=AHCTF1                                                         |            |        |
| Q8WYP5-2;Q8WYP5       | 2 ELYS_HUMAN Isoform 2 of Protein ELYS OS=Homo sapiens GN=AHCTF1;>sp Q8WYP5 ELYS_HUMAN Protein ELYS OS=Homo sapiens    | 1.02E-09   |        |
| Q8WZ42                | TITIN_HUMAN Titin OS=Homo sapiens GN=TTN PE=1 SV=2                                                                     |            | 725.73 |
| Q8WZ42-2              | TITIN_HUMAN Isoform 2 of Titin OS=Homo sapiens GN=TTN                                                                  |            | 724.18 |
| Q8WZ42-3              | TITIN_HUMAN Isoform 3 of Titin OS=Homo sapiens GN=TTN                                                                  |            | 530.92 |
| Q8WZ42-4              | TITIN_HUMAN Isoform 4 of Titin OS=Homo sapiens GN=TTN                                                                  |            | 718.98 |
| Q8WZ42-5              | TITIN_HUMAN Isoform 5 of Titin OS=Homo sapiens GN=TTN                                                                  |            | 617.37 |
| Q8WZ42-6              | TITIN_HUMAN Isoform 6 of Titin OS=Homo sapiens GN=TTN                                                                  |            |        |
| Q8WZ42-7              | TITIN_HUMAN Isoform 7 of Titin OS=Homo sapiens GN=TTN                                                                  |            | 718.98 |
| Q8WZ42-7;Q8WZ42-8;Q8  | 7 TITIN_HUMAN Isoform 7 of Titin OS=Homo sapiens GN=TTN;>sp Q8WZ42-8 TITIN_HUMAN Isoform 8 of Titin OS=Homo sapiens Gf | 9.27E-56   |        |
| Q8WZ42-8              | TITIN_HUMAN Isoform 8 of Titin OS=Homo sapiens GN=TTN                                                                  |            | 732.6  |
| Q8WZ42-8;Q8WZ42;Q8W   | 8 TITIN_HUMAN Isoform 8 of Titin OS=Homo sapiens GN=TTN;>sp Q8WZ42 TITIN_HUMAN Titin OS=Homo sapiens GN=TTN PE=1 SV    | 1.11E-42   |        |
| Q8WZ74                | CTTB2_HUMAN Cortactin-binding protein 2 OS=Homo sapiens GN=CTTNBP2 PE=1 SV=1                                           |            | 47.95  |
| Q8WZA0                | LZIC_HUMAN Protein LZIC OS=Homo sapiens GN=LZIC PE=1 SV=1                                                              |            | 22.73  |
| Q8WZA9                | IRGQ_HUMAN Immunity-related GTPase family Q protein OS=Homo sapiens GN=IRGQ PE=1 SV=1                                  | 4.15E-07   |        |
| Q902F8                | ENK6_HUMAN HERV-K_8p23.1 provirus ancestral Env polyprotein OS=Homo sapiens PE=1 SV=1                                  |            |        |
| Q902F9                | ENK5_HUMAN HERV-K_19p13.11 provirus ancestral Env polyprotein OS=Homo sapiens PE=1 SV=1                                |            |        |
| Q92466                | DDB2_HUMAN DNA damage-binding protein 2 OS=Homo sapiens GN=DDB2 PE=1 SV=1                                              |            |        |
| Q92466-2              | DDB2_HUMAN Isoform D1 of DNA damage-binding protein 2 OS=Homo sapiens GN=DDB2                                          |            |        |
| Q92466-3              | DDB2_HUMAN Isoform D2 of DNA damage-binding protein 2 OS=Homo sapiens GN=DDB2                                          |            |        |
| Q92466-4              | DDB2_HUMAN Isoform D3 of DNA damage-binding protein 2 OS=Homo sapiens GN=DDB2                                          |            |        |
| Q92466-5              | DDB2_HUMAN Isoform D4 of DNA damage-binding protein 2 OS=Homo sapiens GN=DDB2                                          |            |        |
| Q92466;Q92466-4;Q9246 | DDB2_HUMAN DNA damage-binding protein 2 OS=Homo sapiens GN=DDB2 PE=1 SV=1;>sp Q92466-4 DDB2_HUMAN Isoform D3 of        | 5.09E-17   |        |
| Q92481                | AP2B_HUMAN Transcription factor AP-2-beta OS=Homo sapiens GN=TFAP2B PE=1 SV=2                                          |            |        |
| Q92481-2              | AP2B_HUMAN Isoform 2 of Transcription factor AP-2-beta OS=Homo sapiens GN=TFAP2B                                       |            |        |
| Q92499                | DDX1_HUMAN ATP-dependent RNA helicase DDX1 OS=Homo sapiens GN=DDX1 PE=1 SV=2                                           |            | 634.28 |
| Q92503-2;Q92503;Q9250 | 2 S14L1_HUMAN Isoform 2 of SEC14-like protein 1 OS=Homo sapiens GN=SEC14L1;>sp Q92503 S14L1_HUMAN SEC14-like protein : | 0.00024729 |        |
| Q92504                | S39A7_HUMAN Zinc transporter SLC39A7 OS=Homo sapiens GN=SLC39A7 PE=1 SV=2                                              |            | 24.6   |
| Q92506                | DHB8_HUMAN Estradiol 17-beta-dehydrogenase 8 OS=Homo sapiens GN=HSD17B8 PE=1 SV=2                                      | 2.49E-14   |        |
| Q92508                | PIEZ1_HUMAN Protein PIEZO1 OS=Homo sapiens GN=FAM38A PE=1 SV=4                                                         |            | 50.73  |
| Q92520                | FAM3C_HUMAN Protein FAM3C OS=Homo sapiens GN=FAM3C PE=1 SV=1                                                           |            | 722.6  |
| Q92522                | H1X_HUMAN Histone H1x OS=Homo sapiens GN=H1FX PE=1 SV=1                                                                |            | 235.45 |
| Q92526                | TCPW_HUMAN T-complex protein 1 subunit zeta-2 OS=Homo sapiens GN=CCT6B PE=1 SV=5                                       |            | 58.45  |



|                       |                                                                                                                         |            |         |
|-----------------------|-------------------------------------------------------------------------------------------------------------------------|------------|---------|
| Q92530                | PSMF1_HUMAN Proteasome inhibitor PI31 subunit OS=Homo sapiens GN=PSMF1 PE=1 SV=2                                        | 1.50E-14   |         |
| Q92536                | YLAT2_HUMAN Y+L amino acid transporter 2 OS=Homo sapiens GN=SLC7A6 PE=1 SV=3                                            |            | 29.19   |
| Q92538                | GBF1_HUMAN Golgi-specific brefeldin A-resistance guanine nucleotide exchange factor 1 OS=Homo sapiens GN=GBF1 PE=1 SV=2 | 1.89E-12   |         |
| Q92540                | SMG7_HUMAN Protein SMG7 OS=Homo sapiens GN=SMG7 PE=1 SV=2                                                               |            |         |
| Q92540-2              | SMG7_HUMAN Isoform 2 of Protein SMG7 OS=Homo sapiens GN=SMG7                                                            |            |         |
| Q92540-4              | SMG7_HUMAN Isoform 4 of Protein SMG7 OS=Homo sapiens GN=SMG7                                                            |            |         |
| Q92541                | RTF1_HUMAN RNA polymerase-associated protein RTF1 homolog OS=Homo sapiens GN=RTF1 PE=1 SV=4                             | 9.55E-21   |         |
| Q92542                | NICA_HUMAN Nicastrin OS=Homo sapiens GN=NCSTN PE=1 SV=2                                                                 |            | 197.42  |
| Q92542-2              | NICA_HUMAN Isoform 2 of Nicastrin OS=Homo sapiens GN=NCSTN                                                              |            | 197.42  |
| Q92542;Q92542-2       | NICA_HUMAN Nicastrin OS=Homo sapiens GN=NCSTN PE=1 SV=2;>sp Q92542-2 NICA_HUMAN Isoform 2 of Nicastrin OS=Homo sap      | 9.54E-13   |         |
| Q92544                | TM9S4_HUMAN Transmembrane 9 superfamily member 4 OS=Homo sapiens GN=TM9SF4 PE=1 SV=2                                    |            | 205.66  |
| Q92552                | RT27_HUMAN 28S ribosomal protein S27, mitochondrial OS=Homo sapiens GN=MRPS27 PE=1 SV=3                                 |            |         |
| Q92556                | ELMO1_HUMAN Engulfment and cell motility protein 1 OS=Homo sapiens GN=ELMO1 PE=1 SV=2                                   |            | 20.39   |
| Q92556-2              | ELMO1_HUMAN Isoform 2 of Engulfment and cell motility protein 1 OS=Homo sapiens GN=ELMO1                                |            | 20.39   |
| Q92556-3              | ELMO1_HUMAN Isoform 3 of Engulfment and cell motility protein 1 OS=Homo sapiens GN=ELMO1                                |            | 20.39   |
| Q92564;Q92564-2       | DCNL4_HUMAN DCN1-like protein 4 OS=Homo sapiens GN=DCUN1D4 PE=1 SV=2;>sp Q92564-2 DCNL4_HUMAN Isoform 2 of DCN1-        | 8.19E-06   |         |
| Q92572                | AP3S1_HUMAN AP-3 complex subunit sigma-1 OS=Homo sapiens GN=AP3S1 PE=1 SV=1                                             |            | 62.92   |
| Q92575                | UBXN4_HUMAN UBX domain-containing protein 4 OS=Homo sapiens GN=UBXN4 PE=1 SV=2                                          |            | 71.49   |
| Q92576                | PHF3_HUMAN PHD finger protein 3 OS=Homo sapiens GN=PHF3 PE=1 SV=3                                                       |            | 393.26  |
| Q92576-2              | PHF3_HUMAN Isoform 2 of PHD finger protein 3 OS=Homo sapiens GN=PHF3                                                    |            | 393.26  |
| Q92576;Q92576-2       | PHF3_HUMAN PHD finger protein 3 OS=Homo sapiens GN=PHF3 PE=1 SV=3;>sp Q92576-2 PHF3_HUMAN Isoform 2 of PHD finger pr    | 5.56E-15   |         |
| Q92597                | NDRG1_HUMAN Protein NDRG1 OS=Homo sapiens GN=NDRG1 PE=1 SV=1                                                            |            |         |
| Q92598                | HS105_HUMAN Heat shock protein 105 kDa OS=Homo sapiens GN=HSPH1 PE=1 SV=1                                               |            | 44.48   |
| Q92598-2              | HS105_HUMAN Isoform Beta of Heat shock protein 105 kDa OS=Homo sapiens GN=HSPH1                                         |            | 44.48   |
| Q92598-3              | HS105_HUMAN Isoform 3 of Heat shock protein 105 kDa OS=Homo sapiens GN=HSPH1                                            |            | 44.48   |
| Q92598;Q92598-2;Q9259 | HS105_HUMAN Heat shock protein 105 kDa OS=Homo sapiens GN=HSPH1 PE=1 SV=1;>sp Q92598-2 HS105_HUMAN Isoform Beta c       | 0          |         |
| Q92599                | SEPT8_HUMAN Septin-8 OS=Homo sapiens GN=SEPT8 PE=1 SV=4                                                                 |            | 206.37  |
| Q92599-2              | SEPT8_HUMAN Isoform 2 of Septin-8 OS=Homo sapiens GN=SEPT8                                                              |            | 206.37  |
| Q92599-3              | SEPT8_HUMAN Isoform 3 of Septin-8 OS=Homo sapiens GN=SEPT8                                                              |            | 206.37  |
| Q92599;A6NFQ9;C9J9B6; | SEPT8_HUMAN Septin-8 OS=Homo sapiens GN=SEPT8 PE=1 SV=4;>tr A6NFQ9 A6NFQ9_HUMAN Uncharacterized protein OS=Homo :       | 1.16E-13   |         |
| Q92600                | RCD1_HUMAN Cell differentiation protein RCD1 homolog OS=Homo sapiens GN=RQCD1 PE=1 SV=1                                 |            | 135.05  |
| Q92608                | DOCK2_HUMAN Dedicator of cytokinesis protein 2 OS=Homo sapiens GN=DOCK2 PE=1 SV=2                                       |            | 72.51   |
| Q92608-2              | DOCK2_HUMAN Isoform 2 of Dedicator of cytokinesis protein 2 OS=Homo sapiens GN=DOCK2                                    |            | 2.83    |
| Q92610                | ZNF592_HUMAN Zinc finger protein 592 OS=Homo sapiens GN=ZNF592 PE=1 SV=2                                                |            |         |
| Q92614                | MY18A_HUMAN Myosin-XVIIa OS=Homo sapiens GN=MYO18A PE=1 SV=3                                                            |            |         |
| Q92614-2              | MY18A_HUMAN Isoform 2 of Myosin-XVIIa OS=Homo sapiens GN=MYO18A                                                         |            |         |
| Q92614-3              | MY18A_HUMAN Isoform 3 of Myosin-XVIIa OS=Homo sapiens GN=MYO18A                                                         |            |         |
| Q92614-4              | MY18A_HUMAN Isoform 4 of Myosin-XVIIa OS=Homo sapiens GN=MYO18A                                                         |            |         |
| Q92614-5              | MY18A_HUMAN Isoform 5 of Myosin-XVIIa OS=Homo sapiens GN=MYO18A                                                         |            |         |
| Q92614;Q92614-4;Q9261 | MY18A_HUMAN Myosin-XVIIa OS=Homo sapiens GN=MYO18A PE=1 SV=3;>sp Q92614-4 MY18A_HUMAN Isoform 4 of Myosin-XVIIa         | 1.62E-14   |         |
| Q92615                | LAR4B_HUMAN La-related protein 4B OS=Homo sapiens GN=LARP4B PE=1 SV=3                                                   |            | 204.88  |
| Q92616                | GCN1L_HUMAN Translational activator GCN1 OS=Homo sapiens GN=GCN1L1 PE=1 SV=6                                            |            | 1055.21 |
| Q92618;O15090;Q9P2Y4  | ZNF516_HUMAN Zinc finger protein 516 OS=Homo sapiens GN=ZNF516 PE=1 SV=1;>sp O15090 ZNF516_HUMAN Zinc finger protein 5  | 1.81E-12   |         |
| Q92619                | HMHA1_HUMAN Minor histocompatibility protein HA-1 OS=Homo sapiens GN=HMHA1 PE=1 SV=2                                    | 2.10E-22   |         |
| Q92620                | PRP16_HUMAN Pre-splicing factor ATP-dependent RNA helicase PRP16 OS=Homo sapiens GN=DHX38 PE=1 SV=2                     |            |         |
| Q92621                | NU205_HUMAN Nuclear pore complex protein Nup205 OS=Homo sapiens GN=NUP205 PE=1 SV=3                                     |            | 64.17   |
| Q92625                | ANS1A_HUMAN Ankyrin repeat and SAM domain-containing protein 1A OS=Homo sapiens GN=ANKS1A PE=1 SV=4                     | 2.56E-08   |         |
| Q92626;Q92626-2       | PXDN_HUMAN Peroxidase homolog OS=Homo sapiens GN=PXDN PE=1 SV=2;>sp Q92626-2 PXDN_HUMAN Isoform 2 of Peroxidase         | 5.62E-44   |         |
| Q92643                | GPI8_HUMAN GPI-anchor transamidase OS=Homo sapiens GN=PIGK PE=1 SV=2                                                    |            | 129.69  |
| Q92665                | RT31_HUMAN 28S ribosomal protein S31, mitochondrial OS=Homo sapiens GN=MRPS31 PE=1 SV=3                                 |            | 380.68  |
| Q92667;Q92667-2       | AKAP1_HUMAN A-kinase anchor protein 1, mitochondrial OS=Homo sapiens GN=AKAP1 PE=1 SV=1;>sp Q92667-2 AKAP1_HUMAN Is     | 9.79E-06   |         |
| Q92685                | ALG3_HUMAN Dol-P-Man:Man(5)GlcNAc(2)-PP-Dol alpha-1,3-mannosyltransferase OS=Homo sapiens GN=ALG3 PE=1 SV=1             |            |         |
| Q92686                | NEUG_HUMAN Neurogranin OS=Homo sapiens GN=NRGN PE=1 SV=1                                                                | 0.00023684 |         |
| Q92688                | AN32B_HUMAN Acidic leucine-rich nuclear phosphoprotein 32 family member B OS=Homo sapiens GN=ANP32B PE=1 SV=1           |            | 598.62  |
| Q92688-2              | AN32B_HUMAN Isoform 2 of Acidic leucine-rich nuclear phosphoprotein 32 family member B OS=Homo sapiens GN=ANP32B        |            | 598.62  |
| Q92688;Q53F35;Q92688- | AN32B_HUMAN Acidic leucine-rich nuclear phosphoprotein 32 family member B OS=Homo sapiens GN=ANP32B PE=1 SV=1;>tr Q53F  | 2.98E-60   |         |
| Q92692                | PVRL2_HUMAN Poliovirus receptor-related protein 2 OS=Homo sapiens GN=PVRL2 PE=1 SV=1                                    |            | 143.02  |
| Q92692-2              | PVRL2_HUMAN Isoform Alpha of Poliovirus receptor-related protein 2 OS=Homo sapiens GN=PVRL2                             |            | 143.02  |
| Q92692;A8K5L5;Q92692- | PVRL2_HUMAN Poliovirus receptor-related protein 2 OS=Homo sapiens GN=PVRL2 PE=1 SV=1;>tr A8K5L5 A8K5L5_HUMAN cDNA FLJ   | 5.33E-52   |         |
| Q92696                | PGTA_HUMAN Geranylgeranyl transferase type-2 subunit alpha OS=Homo sapiens GN=RABGGTA PE=1 SV=2                         | 2.18E-16   |         |
| Q92734                | TFG_HUMAN Protein TFG OS=Homo sapiens GN=TFG PE=1 SV=2                                                                  |            |         |

|                            |                                                                                                                       |           |        |
|----------------------------|-----------------------------------------------------------------------------------------------------------------------|-----------|--------|
| Q92736                     | RYR2_HUMAN Ryanodine receptor 2 OS=Homo sapiens GN=RYR2 PE=1 SV=3                                                     |           |        |
| Q92736-2                   | RYR2_HUMAN Isoform 2 of Ryanodine receptor 2 OS=Homo sapiens GN=RYR2                                                  |           |        |
| Q92743                     | HTRA1_HUMAN Serine protease HTRA1 OS=Homo sapiens GN=HTRA1 PE=1 SV=1                                                  | 2.15E-23  |        |
| Q92747                     | ARC1A_HUMAN Actin-related protein 2/3 complex subunit 1A OS=Homo sapiens GN=ARPC1A PE=1 SV=2                          | 1.43E-28  |        |
| Q92754                     | AP2C_HUMAN Transcription factor AP-2 gamma OS=Homo sapiens GN=TFAP2C PE=1 SV=1                                        |           |        |
| Q92759                     | TF2H4_HUMAN General transcription factor IIH subunit 4 OS=Homo sapiens GN=GTF2H4 PE=2 SV=1                            |           | 43.09  |
| Q92764                     | KRT35_HUMAN Keratin, type I cuticular Ha5 OS=Homo sapiens GN=KRT35 PE=1 SV=5                                          |           | 70.66  |
| Q92769                     | HDAC2_HUMAN Histone deacetylase 2 OS=Homo sapiens GN=HDAC2 PE=1 SV=2                                                  |           | 126.82 |
| Q92783;Q92783-2            | STAM1_HUMAN Signal transducing adapter molecule 1 OS=Homo sapiens GN=STAM PE=1 SV=3;>sp Q92783-2 STAM1_HUMAN Isofo    | 1.13E-62  |        |
| Q92785                     | REQU_HUMAN Zinc finger protein ubi-d4 OS=Homo sapiens GN=DPF2 PE=1 SV=2                                               |           |        |
| Q92791;B4DVZ5              | SC65_HUMAN Synaptonemal complex protein SC65 OS=Homo sapiens GN=LEPREL4 PE=1 SV=1;>tr B4DVZ5 B4DVZ5_HUMAN cDNA        | 1.47E-09  |        |
| Q92793                     | CBP_HUMAN CREB-binding protein OS=Homo sapiens GN=CREBBP PE=1 SV=3                                                    |           | 12.16  |
| Q92796;Q92796-2            | DLG3_HUMAN Disks large homolog 3 OS=Homo sapiens GN=DLG3 PE=1 SV=2;>sp Q92796-2 DLG3_HUMAN Isoform 2 of Disks large   | 3.84E-09  |        |
| Q92797                     | SYMPK_HUMAN Symplekin OS=Homo sapiens GN=SYMPK PE=1 SV=2                                                              |           | 80.43  |
| Q92797-2                   | SYMPK_HUMAN Isoform 2 of Symplekin OS=Homo sapiens GN=SYMPK                                                           |           | 69.47  |
| Q92797-3                   | SYMPK_HUMAN Isoform 3 of Symplekin OS=Homo sapiens GN=SYMPK                                                           |           | 69.47  |
| Q92797;Q92797-2            | SYMPK_HUMAN Symplekin OS=Homo sapiens GN=SYMPK PE=1 SV=2;>sp Q92797-2 SYMPK_HUMAN Isoform 2 of Symplekin OS=Ho        | 4.43E-140 |        |
| Q92800                     | EZH1_HUMAN Histone-lysine N-methyltransferase EZH1 OS=Homo sapiens GN=EZH1 PE=1 SV=2                                  |           |        |
| Q92800-2                   | EZH1_HUMAN Isoform 2 of Histone-lysine N-methyltransferase EZH1 OS=Homo sapiens GN=EZH1                               |           |        |
| Q92800-3                   | EZH1_HUMAN Isoform 3 of Histone-lysine N-methyltransferase EZH1 OS=Homo sapiens GN=EZH1                               |           |        |
| Q92800-4                   | EZH1_HUMAN Isoform 4 of Histone-lysine N-methyltransferase EZH1 OS=Homo sapiens GN=EZH1                               |           |        |
| Q92800-5                   | EZH1_HUMAN Isoform 5 of Histone-lysine N-methyltransferase EZH1 OS=Homo sapiens GN=EZH1                               |           |        |
| Q92804                     | RBP56_HUMAN TATA-binding protein-associated factor 2N OS=Homo sapiens GN=TAF15 PE=1 SV=1                              |           | 28.16  |
| Q92804-2                   | RBP56_HUMAN Isoform Short of TATA-binding protein-associated factor 2N OS=Homo sapiens GN=TAF15                       |           | 28.16  |
| Q92804;Q92804-2            | RBP56_HUMAN TATA-binding protein-associated factor 2N OS=Homo sapiens GN=TAF15 PE=1 SV=1;>sp Q92804-2 RBP56_HUMAN Is  | 2.79E-124 |        |
| Q92805                     | GOGA1_HUMAN Golgin subfamily A member 1 OS=Homo sapiens GN=GOLGA1 PE=1 SV=3                                           |           |        |
| Q92817                     | EVPL_HUMAN Envoplakin OS=Homo sapiens GN=EVPL PE=1 SV=3                                                               |           |        |
| Q92820                     | GGH_HUMAN Gamma-glutamyl hydrolase OS=Homo sapiens GN=GGH PE=1 SV=2                                                   |           | 80.91  |
| Q92824                     | PCSK5_HUMAN Proprotein convertase subtilisin/kexin type 5 OS=Homo sapiens GN=PCSK5 PE=2 SV=3                          |           |        |
| Q92830                     | KAT2A_HUMAN Histone acetyltransferase KAT2A OS=Homo sapiens GN=KAT2A PE=1 SV=3                                        |           |        |
| Q92830-2                   | KAT2A_HUMAN Isoform 2 of Histone acetyltransferase KAT2A OS=Homo sapiens GN=KAT2A                                     |           |        |
| Q92833                     | JARD2_HUMAN Protein Jumonji OS=Homo sapiens GN=JARID2 PE=1 SV=2                                                       |           | 55.17  |
| Q92833-2                   | JARD2_HUMAN Isoform 2 of Protein Jumonji OS=Homo sapiens GN=JARID2                                                    |           | 51.2   |
| Q92834                     | RPGR_HUMAN X-linked retinitis pigmentosa GTPase regulator OS=Homo sapiens GN=RPGR PE=1 SV=2                           |           |        |
| Q92834-2                   | RPGR_HUMAN Isoform 2 of X-linked retinitis pigmentosa GTPase regulator OS=Homo sapiens GN=RPGR                        |           |        |
| Q92834-3                   | RPGR_HUMAN Isoform 3 of X-linked retinitis pigmentosa GTPase regulator OS=Homo sapiens GN=RPGR                        |           |        |
| Q92834-4                   | RPGR_HUMAN Isoform 4 of X-linked retinitis pigmentosa GTPase regulator OS=Homo sapiens GN=RPGR                        |           |        |
| Q92834-5                   | RPGR_HUMAN Isoform 5 of X-linked retinitis pigmentosa GTPase regulator OS=Homo sapiens GN=RPGR                        |           |        |
| Q92835                     | SHIP1_HUMAN Phosphatidylinositol-3,4,5-trisphosphate 5-phosphatase 1 OS=Homo sapiens GN=INPP5D PE=1 SV=2              |           | 29.22  |
| Q92835-2                   | SHIP1_HUMAN Isoform 2 of Phosphatidylinositol-3,4,5-trisphosphate 5-phosphatase 1 OS=Homo sapiens GN=INPP5D           |           | 29.22  |
| Q92835-3                   | SHIP1_HUMAN Isoform 3 of Phosphatidylinositol-3,4,5-trisphosphate 5-phosphatase 1 OS=Homo sapiens GN=INPP5D           |           | 24.15  |
| Q92835;Q92835-2;Q92835-3   | SHIP1_HUMAN Phosphatidylinositol-3,4,5-trisphosphate 5-phosphatase 1 OS=Homo sapiens GN=INPP5D PE=1 SV=2;>sp Q92835-2 | 4.96E-12  |        |
| Q92839                     | HAS1_HUMAN Hyaluronan synthase 1 OS=Homo sapiens GN=HAS1 PE=1 SV=2                                                    |           |        |
| Q92841                     | DDX17_HUMAN Probable ATP-dependent RNA helicase DDX17 OS=Homo sapiens GN=DDX17 PE=1 SV=1                              |           | 400.56 |
| Q92841-2                   | DDX17_HUMAN Isoform 2 of Probable ATP-dependent RNA helicase DDX17 OS=Homo sapiens GN=DDX17                           |           | 400.56 |
| Q92841-3                   | DDX17_HUMAN Isoform 3 of Probable ATP-dependent RNA helicase DDX17 OS=Homo sapiens GN=DDX17                           |           | 400.56 |
| Q92841-4                   | DDX17_HUMAN Isoform 4 of Probable ATP-dependent RNA helicase DDX17 OS=Homo sapiens GN=DDX17                           |           | 433.87 |
| Q92841-4;Q92841-3;Q92841-2 | DDX17_HUMAN Isoform 4 of Probable ATP-dependent RNA helicase DDX17 OS=Homo sapiens GN=DDX17;>sp Q92841-3 DDX17_H      | 0         |        |
| Q92847                     | GHSR_HUMAN Growth hormone secretagogue receptor type 1 OS=Homo sapiens GN=GHSR PE=1 SV=1                              |           |        |
| Q92847-2                   | GHSR_HUMAN Isoform 1B of Growth hormone secretagogue receptor type 1 OS=Homo sapiens GN=GHSR                          |           |        |
| Q92858                     | ATOH1_HUMAN Protein atonal homolog 1 OS=Homo sapiens GN=ATOH1 PE=2 SV=1                                               |           |        |
| Q92859                     | NEO1_HUMAN Neogenin OS=Homo sapiens GN=NEO1 PE=1 SV=2                                                                 |           |        |
| Q92859-2                   | NEO1_HUMAN Isoform 2 of Neogenin OS=Homo sapiens GN=NEO1                                                              |           |        |
| Q92876;Q92876-2            | KLK6_HUMAN Kallikrein-6 OS=Homo sapiens GN=KLK6 PE=1 SV=1;>sp Q92876-2 KLK6_HUMAN Isoform 2 of Kallikrein-6 OS=Homo   | 1.64E-13  |        |
| Q92878                     | RAD50_HUMAN DNA repair protein RAD50 OS=Homo sapiens GN=RAD50 PE=1 SV=1                                               |           | 178.49 |
| Q92878-2                   | RAD50_HUMAN Isoform 2 of DNA repair protein RAD50 OS=Homo sapiens GN=RAD50                                            |           | 178.49 |
| Q92878-2;Q92878;Q92878-3   | RAD50_HUMAN Isoform 2 of DNA repair protein RAD50 OS=Homo sapiens GN=RAD50;>sp Q92878 RAD50_HUMAN DNA repair prot     | 2.73E-180 |        |
| Q92878-3                   | RAD50_HUMAN Isoform 3 of DNA repair protein RAD50 OS=Homo sapiens GN=RAD50                                            |           | 179.39 |
| Q92879                     | CELF1_HUMAN CUGBP Elav-like family member 1 OS=Homo sapiens GN=CELF1 PE=1 SV=2                                        |           | 48.93  |
| Q92879-2                   | CELF1_HUMAN Isoform 2 of CUGBP Elav-like family member 1 OS=Homo sapiens GN=CELF1                                     |           | 48.93  |
| Q92879-3                   | CELF1_HUMAN Isoform 3 of CUGBP Elav-like family member 1 OS=Homo sapiens GN=CELF1                                     |           | 48.93  |

|                          |                                                                                                                                                   |           |        |
|--------------------------|---------------------------------------------------------------------------------------------------------------------------------------------------|-----------|--------|
| Q92879-4                 | CELF1_HUMAN Isoform 4 of CUGBP Elav-like family member 1 OS=Homo sapiens GN=CELF1                                                                 |           | 48.93  |
| Q92879-4;D3DQS0;Q92879-4 | CELF1_HUMAN Isoform 4 of CUGBP Elav-like family member 1 OS=Homo sapiens GN=CELF1;>tr D3DQS0 D3DQS0_HUMAN CUG tri                                 | 4.65E-11  |        |
| Q92882                   | OSTF1_HUMAN Osteoclast-stimulating factor 1 OS=Homo sapiens GN=OSTF1 PE=1 SV=2                                                                    |           | 98.36  |
| Q92887                   | MRP2_HUMAN Canalicular multispecific organic anion transporter 1 OS=Homo sapiens GN=ABCC2 PE=1 SV=3                                               |           | 27.99  |
| Q92888                   | ARHG1_HUMAN Rho guanine nucleotide exchange factor 1 OS=Homo sapiens GN=ARHGEF1 PE=1 SV=2                                                         |           | 56.13  |
| Q92888-2                 | ARHG1_HUMAN Isoform 2 of Rho guanine nucleotide exchange factor 1 OS=Homo sapiens GN=ARHGEF1                                                      |           | 56.13  |
| Q92888-3                 | ARHG1_HUMAN Isoform 3 of Rho guanine nucleotide exchange factor 1 OS=Homo sapiens GN=ARHGEF1                                                      |           | 56.13  |
| Q92888-3;Q92888;Q92888-3 | ARHG1_HUMAN Isoform 3 of Rho guanine nucleotide exchange factor 1 OS=Homo sapiens GN=ARHGEF1;>sp Q92888 ARHG1_HUM                                 | 1.58E-15  |        |
| Q92889;C9J754;B4DXD8     | XPF_HUMAN DNA repair endonuclease XPF OS=Homo sapiens GN=ERCC4 PE=1 SV=3;>tr C9J754 C9J754_HUMAN Uncharacterized pr                               | 7.46E-08  |        |
| Q92890                   | UFD1_HUMAN Ubiquitin fusion degradation protein 1 homolog OS=Homo sapiens GN=UFD1L PE=1 SV=3                                                      |           | 113.82 |
| Q92890-1                 | UFD1_HUMAN Isoform Long of Ubiquitin fusion degradation protein 1 homolog OS=Homo sapiens GN=UFD1L                                                |           | 113.82 |
| Q92890-1;Q92890          | UFD1_HUMAN Isoform Long of Ubiquitin fusion degradation protein 1 homolog OS=Homo sapiens GN=UFD1L;>sp Q92890 UFD1_HI                             | 1.01E-12  |        |
| Q92896                   | GSLG1_HUMAN Golgi apparatus protein 1 OS=Homo sapiens GN=GLG1 PE=1 SV=2                                                                           |           | 210.86 |
| Q92896-2                 | GSLG1_HUMAN Isoform 2 of Golgi apparatus protein 1 OS=Homo sapiens GN=GLG1                                                                        |           | 210.86 |
| Q92896-2;B7Z8Y4;D3DUJ    | GSLG1_HUMAN Isoform 2 of Golgi apparatus protein 1 OS=Homo sapiens GN=GLG1;>tr B7Z8Y4 B7Z8Y4_HUMAN cDNA FLJ61698,                                 | 3.05E-54  |        |
| Q92900                   | RENT1_HUMAN Regulator of nonsense transcripts 1 OS=Homo sapiens GN=UPF1 PE=1 SV=2                                                                 |           | 290.7  |
| Q92900-2                 | RENT1_HUMAN Isoform 2 of Regulator of nonsense transcripts 1 OS=Homo sapiens GN=UPF1                                                              |           | 290.7  |
| Q92900;Q92900-2          | RENT1_HUMAN Regulator of nonsense transcripts 1 OS=Homo sapiens GN=UPF1 PE=1 SV=2;>sp Q92900-2 RENT1_HUMAN Isoform                                | 2.20E-23  |        |
| Q92901                   | RL3L_HUMAN 60S ribosomal protein L3-like OS=Homo sapiens GN=RPL3L PE=1 SV=3                                                                       |           | 76.86  |
| Q92905                   | CSN5_HUMAN COP9 signalosome complex subunit 5 OS=Homo sapiens GN=COPS5 PE=1 SV=4                                                                  |           | 188.88 |
| Q92917                   | GPKOW_HUMAN G patch domain and KOW motifs-containing protein OS=Homo sapiens GN=GPKOW PE=1 SV=2                                                   |           | 75.38  |
| Q92918                   | M4K1_HUMAN Mitogen-activated protein kinase kinase kinase 1 OS=Homo sapiens GN=MAP4K1 PE=1 SV=1                                                   |           |        |
| Q92918-2                 | M4K1_HUMAN Isoform 2 of Mitogen-activated protein kinase kinase kinase 1 OS=Homo sapiens GN=MAP4K1                                                |           |        |
| Q92918;Q92918-2          | M4K1_HUMAN Mitogen-activated protein kinase kinase kinase 1 OS=Homo sapiens GN=MAP4K1 PE=1 SV=1;>sp Q92918-2 M4                                   | 3.08E-21  |        |
| Q92922                   | SMRC1_HUMAN SWI/SNF complex subunit SMARCC1 OS=Homo sapiens GN=SMARCC1 PE=1 SV=3                                                                  |           | 31.79  |
| Q92925                   | SMRD2_HUMAN SWI/SNF-related matrix-associated actin-dependent regulator of chromatin subfamily D member 2 OS=Homo sapiens GN=SMARCD2 PE=1 SV=3    |           |        |
| Q92925-2                 | SMRD2_HUMAN Isoform 2 of SWI/SNF-related matrix-associated actin-dependent regulator of chromatin subfamily D member 2 OS=Homo sapiens GN=SMARCD2 |           |        |
| Q92925-3                 | SMRD2_HUMAN Isoform 3 of SWI/SNF-related matrix-associated actin-dependent regulator of chromatin subfamily D member 2 OS=Homo sapiens GN=SMARCD2 |           |        |
| Q92925;Q92925-2;Q92925-3 | SMRD2_HUMAN SWI/SNF-related matrix-associated actin-dependent regulator of chromatin subfamily D member 2 OS=Homo sapiens                         | 5.28E-69  |        |
| Q92928                   | RAB1C_HUMAN Putative Ras-related protein Rab-1C OS=Homo sapiens GN=RAB1C PE=5 SV=2                                                                |           | 768.31 |
| Q92930                   | RAB8B_HUMAN Ras-related protein Rab-8B OS=Homo sapiens GN=RAB8B PE=1 SV=2                                                                         |           | 524.69 |
| Q92934                   | BAD_HUMAN Bcl2 antagonist of cell death OS=Homo sapiens GN=BAD PE=1 SV=3                                                                          |           | 26.53  |
| Q92935                   | EXTL1_HUMAN Exostosin-like 1 OS=Homo sapiens GN=EXTL1 PE=1 SV=2                                                                                   |           |        |
| Q92945                   | FUBP2_HUMAN Far upstream element-binding protein 2 OS=Homo sapiens GN=KHSRP PE=1 SV=4                                                             |           | 681.96 |
| Q92945-2                 | FUBP2_HUMAN Isoform 2 of Far upstream element-binding protein 2 OS=Homo sapiens GN=KHSRP                                                          |           | 681.96 |
| Q92945;Q92945-2          | FUBP2_HUMAN Far upstream element-binding protein 2 OS=Homo sapiens GN=KHSRP PE=1 SV=4;>sp Q92945-2 FUBP2_HUMAN Iso                                | 0         |        |
| Q92947                   | GCDH_HUMAN Glutaryl-CoA dehydrogenase, mitochondrial OS=Homo sapiens GN=GCDH PE=1 SV=1                                                            | 0.0001469 |        |
| Q92954                   | PRG4_HUMAN Proteoglycan 4 OS=Homo sapiens GN=PRG4 PE=1 SV=2                                                                                       |           | 21.83  |
| Q92954-2                 | PRG4_HUMAN Isoform B of Proteoglycan 4 OS=Homo sapiens GN=PRG4                                                                                    |           | 21.83  |
| Q92954-3                 | PRG4_HUMAN Isoform C of Proteoglycan 4 OS=Homo sapiens GN=PRG4                                                                                    |           | 21.83  |
| Q92954-4                 | PRG4_HUMAN Isoform D of Proteoglycan 4 OS=Homo sapiens GN=PRG4                                                                                    |           | 21.83  |
| Q92954-6                 | PRG4_HUMAN Isoform F of Proteoglycan 4 OS=Homo sapiens GN=PRG4                                                                                    |           | 21.83  |
| Q92973                   | TNPO1_HUMAN Transportin-1 OS=Homo sapiens GN=TNPO1 PE=1 SV=2                                                                                      |           | 65.88  |
| Q92973-2                 | TNPO1_HUMAN Isoform 2 of Transportin-1 OS=Homo sapiens GN=TNPO1                                                                                   |           | 65.88  |
| Q92973-3                 | TNPO1_HUMAN Isoform 3 of Transportin-1 OS=Homo sapiens GN=TNPO1                                                                                   |           | 61.15  |
| Q92973;Q92973-2;Q92973-3 | TNPO1_HUMAN Transportin-1 OS=Homo sapiens GN=TNPO1 PE=1 SV=2;>sp Q92973-2 TNPO1_HUMAN Isoform 2 of Transportin-1 O                                | 0         |        |
| Q92974                   | ARHG2_HUMAN Rho guanine nucleotide exchange factor 2 OS=Homo sapiens GN=ARHGEF2 PE=1 SV=4                                                         |           | 120.24 |
| Q92974-2                 | ARHG2_HUMAN Isoform 2 of Rho guanine nucleotide exchange factor 2 OS=Homo sapiens GN=ARHGEF2                                                      |           | 120.24 |
| Q92974-3                 | ARHG2_HUMAN Isoform 3 of Rho guanine nucleotide exchange factor 2 OS=Homo sapiens GN=ARHGEF2                                                      |           | 120.24 |
| Q92974;Q92974-2;Q92974-3 | ARHG2_HUMAN Rho guanine nucleotide exchange factor 2 OS=Homo sapiens GN=ARHGEF2 PE=1 SV=4;>sp Q92974-2 ARHG2_HUM                                  | 1.12E-155 |        |
| Q92979                   | NEP1_HUMAN Ribosomal RNA small subunit methyltransferase NEP1 OS=Homo sapiens GN=EMG1 PE=1 SV=4                                                   |           | 112.3  |
| Q92993                   | KAT5_HUMAN Histone acetyltransferase KAT5 OS=Homo sapiens GN=KAT5 PE=1 SV=2                                                                       |           |        |
| Q92993-2                 | KAT5_HUMAN Isoform 2 of Histone acetyltransferase KAT5 OS=Homo sapiens GN=KAT5                                                                    |           |        |
| Q92993-3                 | KAT5_HUMAN Isoform 3 of Histone acetyltransferase KAT5 OS=Homo sapiens GN=KAT5                                                                    |           |        |
| Q92995                   | UBP13_HUMAN Ubiquitin carboxyl-terminal hydrolase 13 OS=Homo sapiens GN=USP13 PE=1 SV=2                                                           | 1.54E-07  |        |
| Q93008                   | USP9X_HUMAN Probable ubiquitin carboxyl-terminal hydrolase FAF-X OS=Homo sapiens GN=USP9X PE=1 SV=3                                               |           |        |
| Q93008-1                 | USP9X_HUMAN Isoform 2 of Probable ubiquitin carboxyl-terminal hydrolase FAF-X OS=Homo sapiens GN=USP9X                                            |           |        |
| Q93008;Q93008-1          | USP9X_HUMAN Probable ubiquitin carboxyl-terminal hydrolase FAF-X OS=Homo sapiens GN=USP9X PE=1 SV=3;>sp Q93008-1 USP9                             | 1.07E-110 |        |
| Q93009                   | UBP7_HUMAN Ubiquitin carboxyl-terminal hydrolase 7 OS=Homo sapiens GN=USP7 PE=1 SV=2                                                              |           | 252.59 |
| Q93034                   | CUL5_HUMAN Cullin-5 OS=Homo sapiens GN=CUL5 PE=1 SV=4                                                                                             |           | 50.33  |
| Q93045                   | STMN2_HUMAN Stathmin-2 OS=Homo sapiens GN=STMN2 PE=1 SV=3                                                                                         |           | 136.47 |

|                       |                                                                                                                                                   |           |        |
|-----------------------|---------------------------------------------------------------------------------------------------------------------------------------------------|-----------|--------|
| Q93052                | LPP_HUMAN Lipoma-preferred partner OS=Homo sapiens GN=LPP PE=1 SV=1                                                                               | 1.78E-55  |        |
| Q93063-2;Q93063       | 2 EXT2_HUMAN Isoform 2 of Exostosin-2 OS=Homo sapiens GN=EXT2;>sp Q93063 EXT2_HUMAN Exostosin-2 OS=Homo sapiens GN                                | 6.81E-05  |        |
| Q93074                | MED12_HUMAN Mediator of RNA polymerase II transcription subunit 12 OS=Homo sapiens GN=MED12 PE=1 SV=4                                             |           | 44.74  |
| Q93074-2              | MED12_HUMAN Isoform 2 of Mediator of RNA polymerase II transcription subunit 12 OS=Homo sapiens GN=MED12                                          |           | 44.74  |
| Q93074-3              | MED12_HUMAN Isoform 3 of Mediator of RNA polymerase II transcription subunit 12 OS=Homo sapiens GN=MED12                                          |           | 44.74  |
| Q93077                | H2A1C_HUMAN Histone H2A type 1-C OS=Homo sapiens GN=HIST1H2AC PE=1 SV=3                                                                           |           | 212.14 |
| Q93079                | H2B1H_HUMAN Histone H2B type 1-H OS=Homo sapiens GN=HIST1H2BH PE=1 SV=3                                                                           |           | 708.52 |
| Q93084                | AT2A3_HUMAN Sarcoplasmic/endoplasmic reticulum calcium ATPase 3 OS=Homo sapiens GN=ATP2A3 PE=1 SV=2                                               |           | 239.61 |
| Q93084-2              | AT2A3_HUMAN Isoform SERCA3A of Sarcoplasmic/endoplasmic reticulum calcium ATPase 3 OS=Homo sapiens GN=ATP2A3                                      |           | 239.61 |
| Q93084-3              | AT2A3_HUMAN Isoform SERCA3C of Sarcoplasmic/endoplasmic reticulum calcium ATPase 3 OS=Homo sapiens GN=ATP2A3                                      |           | 239.61 |
| Q93084-4              | AT2A3_HUMAN Isoform SERCA3D of Sarcoplasmic/endoplasmic reticulum calcium ATPase 3 OS=Homo sapiens GN=ATP2A3                                      |           | 239.61 |
| Q93084-5              | AT2A3_HUMAN Isoform SERCA3E of Sarcoplasmic/endoplasmic reticulum calcium ATPase 3 OS=Homo sapiens GN=ATP2A3                                      |           | 239.61 |
| Q93084-5;Q93084;Q9308 | 5 AT2A3_HUMAN Isoform SERCA3E of Sarcoplasmic/endoplasmic reticulum calcium ATPase 3 OS=Homo sapiens GN=ATP2A3;>sp Q93084                         | 9.32E-191 |        |
| Q93084-6              | AT2A3_HUMAN Isoform SERCA3F of Sarcoplasmic/endoplasmic reticulum calcium ATPase 3 OS=Homo sapiens GN=ATP2A3                                      |           | 240.59 |
| Q93096                | TP4A1_HUMAN Protein tyrosine phosphatase type IVA 1 OS=Homo sapiens GN=PTP4A1 PE=1 SV=2                                                           |           | 100.86 |
| Q93097                | WNT2B_HUMAN Protein Wnt-2b OS=Homo sapiens GN=WNT2B PE=1 SV=2                                                                                     |           |        |
| Q93097-2              | WNT2B_HUMAN Isoform 1 of Protein Wnt-2b OS=Homo sapiens GN=WNT2B                                                                                  |           |        |
| Q95365                | 1B38_HUMAN HLA class I histocompatibility antigen, B-38 alpha chain OS=Homo sapiens GN=HLA-B PE=2 SV=1                                            |           | 382.83 |
| Q95604                | 1C17_HUMAN HLA class I histocompatibility antigen, Cw-17 alpha chain OS=Homo sapiens GN=HLA-C PE=1 SV=1                                           |           | 473.08 |
| Q95IE3                | 2B1C_HUMAN HLA class II histocompatibility antigen, DRB1-12 beta chain OS=Homo sapiens GN=HLA-DRB1 PE=1 SV=1                                      |           | 0.15   |
| Q969E2                | SCAM4_HUMAN Secretory carrier-associated membrane protein 4 OS=Homo sapiens GN=SCAMP4 PE=2 SV=1                                                   |           | 69.53  |
| Q969E2-2              | SCAM4_HUMAN Isoform 2 of Secretory carrier-associated membrane protein 4 OS=Homo sapiens GN=SCAMP4                                                |           | 69.53  |
| Q969E2-3              | SCAM4_HUMAN Isoform 3 of Secretory carrier-associated membrane protein 4 OS=Homo sapiens GN=SCAMP4                                                |           | 24.97  |
| Q969E2;Q969E2-2;Q969E | SCAM4_HUMAN Secretory carrier-associated membrane protein 4 OS=Homo sapiens GN=SCAMP4 PE=2 SV=1;>sp Q969E2-2 SCAM4                                | 1.02E-08  |        |
| Q969E4;Q5H9L2         | TCAL3_HUMAN Transcription elongation factor A protein-like 3 OS=Homo sapiens GN=TCEAL3 PE=1 SV=1;>sp Q5H9L2 TCAL3_HUMA                            | 4.09E-14  |        |
| Q969F9                | HPS3_HUMAN Hermansky-Pudlak syndrome 3 protein OS=Homo sapiens GN=HPS3 PE=1 SV=1                                                                  |           | 26.85  |
| Q969F9-2              | HPS3_HUMAN Isoform 2 of Hermansky-Pudlak syndrome 3 protein OS=Homo sapiens GN=HPS3                                                               |           | 26.85  |
| Q969G3                | SMCE1_HUMAN SWI/SNF-related matrix-associated actin-dependent regulator of chromatin subfamily E member 1 OS=Homo sapiens GN=SMARCE1 PE=1 SV=2    |           |        |
| Q969G3-2              | SMCE1_HUMAN Isoform 2 of SWI/SNF-related matrix-associated actin-dependent regulator of chromatin subfamily E member 1 OS=Homo sapiens GN=SMARCE1 |           |        |
| Q969G3;B4DGM3;Q969G3  | SMCE1_HUMAN SWI/SNF-related matrix-associated actin-dependent regulator of chromatin subfamily E member 1 OS=Homo sapiens                         | 7.66E-09  |        |
| Q969G5                | PRDBP_HUMAN Protein kinase C delta-binding protein OS=Homo sapiens GN=PRKCDBP PE=1 SV=3                                                           |           | 465.78 |
| Q969H6                | POP5_HUMAN Ribonuclease P/MRP protein subunit POP5 OS=Homo sapiens GN=POP5 PE=1 SV=1                                                              |           | 125.85 |
| Q969H8                | CS010_HUMAN UPF0556 protein C19orf10 OS=Homo sapiens GN=C19orf10 PE=1 SV=1                                                                        |           | 332.43 |
| Q969J2                | ZKSC4_HUMAN Zinc finger protein with KRAB and SCAN domains 4 OS=Homo sapiens GN=ZKSCAN4 PE=1 SV=1                                                 |           |        |
| Q969J3                | L12R1_HUMAN Loss of heterozygosity 12 chromosomal region 1 protein OS=Homo sapiens GN=LOH12CR1 PE=1 SV=1                                          |           | 41.52  |
| Q969L2                | MAL2_HUMAN Protein MAL2 OS=Homo sapiens GN=MAL2 PE=1 SV=1                                                                                         |           |        |
| Q969M3                | YIPF5_HUMAN Protein YIPF5 OS=Homo sapiens GN=YIPF5 PE=1 SV=1                                                                                      |           | 55.31  |
| Q969M3-2              | YIPF5_HUMAN Isoform 2 of Protein YIPF5 OS=Homo sapiens GN=YIPF5                                                                                   |           | 37.76  |
| Q969M3-3              | YIPF5_HUMAN Isoform 3 of Protein YIPF5 OS=Homo sapiens GN=YIPF5                                                                                   |           | 55.31  |
| Q969N2                | PIGT_HUMAN GPI transamidase component PIG-T OS=Homo sapiens GN=PIGT PE=1 SV=1                                                                     |           | 47.31  |
| Q969N2-2              | PIGT_HUMAN Isoform 2 of GPI transamidase component PIG-T OS=Homo sapiens GN=PIGT                                                                  |           | 47.31  |
| Q969N2-3              | PIGT_HUMAN Isoform 3 of GPI transamidase component PIG-T OS=Homo sapiens GN=PIGT                                                                  |           | 10.56  |
| Q969N2-4              | PIGT_HUMAN Isoform 4 of GPI transamidase component PIG-T OS=Homo sapiens GN=PIGT                                                                  |           | 47.31  |
| Q969N2;Q969N2-4;Q969N | PIGT_HUMAN GPI transamidase component PIG-T OS=Homo sapiens GN=PIGT PE=1 SV=1;>sp Q969N2-4 PIGT_HUMAN Isoform 4 of                                | 6.31E-15  |        |
| Q969P6                | TOP1M_HUMAN DNA topoisomerase I, mitochondrial OS=Homo sapiens GN=TOP1MT PE=2 SV=1                                                                |           | 119.6  |
| Q969Q0                | RL36L_HUMAN 60S ribosomal protein L36a-like OS=Homo sapiens GN=RPL36AL PE=1 SV=3                                                                  |           | 241.36 |
| Q969Q5                | RAB24_HUMAN Ras-related protein Rab-24 OS=Homo sapiens GN=RAB24 PE=1 SV=1                                                                         | 4.54E-12  |        |
| Q969S3                | ZNF622_HUMAN Zinc finger protein 622 OS=Homo sapiens GN=ZNF622 PE=1 SV=1                                                                          |           |        |
| Q969T4                | UB2E3_HUMAN Ubiquitin-conjugating enzyme E2 E3 OS=Homo sapiens GN=UBE2E3 PE=1 SV=1                                                                | 9.30E-11  |        |
| Q969T7                | 5NT3L_HUMAN Cytosolic 5'-nucleotidase III-like protein OS=Homo sapiens GN=NT5C3L PE=1 SV=3                                                        |           | 39.01  |
| Q969T9                | WBP2_HUMAN WW domain-binding protein 2 OS=Homo sapiens GN=WBP2 PE=1 SV=1                                                                          |           | 37.15  |
| Q969U7                | PSMG2_HUMAN Proteasome assembly chaperone 2 OS=Homo sapiens GN=PSMG2 PE=1 SV=1                                                                    | 1.14E-15  |        |
| Q969V3                | NCLN_HUMAN Nicalin OS=Homo sapiens GN=NCLN PE=1 SV=2                                                                                              |           | 226.4  |
| Q969V3-2              | NCLN_HUMAN Isoform 2 of Nicalin OS=Homo sapiens GN=NCLN                                                                                           |           | 226.4  |
| Q969V3;Q969V3-2       | NCLN_HUMAN Nicalin OS=Homo sapiens GN=NCLN PE=1 SV=2;>sp Q969V3-2 NCLN_HUMAN Isoform 2 of Nicalin OS=Homo sapiens                                 | 7.86E-13  |        |
| Q969X1                | TMBI1_HUMAN Transmembrane BAX inhibitor motif-containing protein 1 OS=Homo sapiens GN=TMBIM1 PE=1 SV=2                                            |           | 74.44  |
| Q969X5                | ERGI1_HUMAN Endoplasmic reticulum-Golgi intermediate compartment protein 1 OS=Homo sapiens GN=ERGIC1 PE=1 SV=1                                    |           |        |
| Q969X5-2              | ERGI1_HUMAN Isoform 2 of Endoplasmic reticulum-Golgi intermediate compartment protein 1 OS=Homo sapiens GN=ERGIC1                                 |           |        |
| Q969X5-3              | ERGI1_HUMAN Isoform 3 of Endoplasmic reticulum-Golgi intermediate compartment protein 1 OS=Homo sapiens GN=ERGIC1                                 |           |        |
| Q969X5;B4E0N6;Q969X5- | ERGI1_HUMAN Endoplasmic reticulum-Golgi intermediate compartment protein 1 OS=Homo sapiens GN=ERGIC1 PE=1 SV=1;>tr B4E                            | 8.94E-49  |        |
| Q969X6                | CIR1A_HUMAN Cirhin OS=Homo sapiens GN=CIRH1A PE=1 SV=1                                                                                            |           |        |

|                        |                                                                                                                               |           |        |
|------------------------|-------------------------------------------------------------------------------------------------------------------------------|-----------|--------|
| Q969X6-2               | CIR1A_HUMAN Isoform 2 of Cirhin OS=Homo sapiens GN=CIRH1A                                                                     |           |        |
| Q969X6-3               | CIR1A_HUMAN Isoform 3 of Cirhin OS=Homo sapiens GN=CIRH1A                                                                     |           |        |
| Q969X6;Q969X6-2        | CIR1A_HUMAN Cirhin OS=Homo sapiens GN=CIRH1A PE=1 SV=1;>sp Q969X6-2 CIR1A_HUMAN Isoform 2 of Cirhin OS=Homo sapiens GN=CIRH1A | 6.50E-10  |        |
| Q969Y2                 | GTPB3_HUMAN tRNA modification GTPase GTPBP3, mitochondrial OS=Homo sapiens GN=GTPBP3 PE=2 SV=2                                |           |        |
| Q969Y2-2               | GTPB3_HUMAN Isoform 2 of tRNA modification GTPase GTPBP3, mitochondrial OS=Homo sapiens GN=GTPBP3                             |           |        |
| Q969Y2-3               | GTPB3_HUMAN Isoform 3 of tRNA modification GTPase GTPBP3, mitochondrial OS=Homo sapiens GN=GTPBP3                             |           |        |
| Q969Z0                 | TBRG4_HUMAN Protein TBRG4 OS=Homo sapiens GN=TBRG4 PE=1 SV=1                                                                  |           | 58.39  |
| Q969Z0-2               | TBRG4_HUMAN Isoform 2 of Protein TBRG4 OS=Homo sapiens GN=TBRG4                                                               |           | 58.39  |
| Q969Z0;Q969Z0-2        | TBRG4_HUMAN Protein TBRG4 OS=Homo sapiens GN=TBRG4 PE=1 SV=1;>sp Q969Z0-2 TBRG4_HUMAN Isoform 2 of Protein TBRG4              | 4.90E-53  |        |
| Q96A08                 | H2B1A_HUMAN Histone H2B type 1-A OS=Homo sapiens GN=HIST1H2BA PE=1 SV=3                                                       |           | 184.64 |
| Q96A22                 | CK052_HUMAN Uncharacterized protein C11orf52 OS=Homo sapiens GN=C11orf52 PE=1 SV=2                                            | 8.89E-07  |        |
| Q96A23                 | CPNE4_HUMAN Copine-4 OS=Homo sapiens GN=CPNE4 PE=2 SV=1                                                                       |           |        |
| Q96A23-2               | CPNE4_HUMAN Isoform 2 of Copine-4 OS=Homo sapiens GN=CPNE4                                                                    |           |        |
| Q96A26                 | F162A_HUMAN Protein FAM162A OS=Homo sapiens GN=FAM162A PE=1 SV=2                                                              |           | 48.68  |
| Q96A33                 | CCD47_HUMAN Coiled-coil domain-containing protein 47 OS=Homo sapiens GN=CCDC47 PE=1 SV=1                                      |           | 86.97  |
| Q96A33-2               | CCD47_HUMAN Isoform 2 of Coiled-coil domain-containing protein 47 OS=Homo sapiens GN=CCDC47                                   |           | 88.02  |
| Q96A33;Q96A33-2        | CCD47_HUMAN Coiled-coil domain-containing protein 47 OS=Homo sapiens GN=CCDC47 PE=1 SV=1;>sp Q96A33-2 CCD47_HUMAN             | 3.28E-17  |        |
| Q96A35                 | RM24_HUMAN 39S ribosomal protein L24, mitochondrial OS=Homo sapiens GN=MRPL24 PE=1 SV=1                                       |           | 46.02  |
| Q96A49                 | SYAP1_HUMAN Synapse-associated protein 1 OS=Homo sapiens GN=SYAP1 PE=1 SV=1                                                   | 2.31E-09  |        |
| Q96A57                 | CT030_HUMAN UPF0414 transmembrane protein C20orf30 OS=Homo sapiens GN=C20orf30 PE=1 SV=1                                      |           |        |
| Q96A57-2               | CT030_HUMAN Isoform 1 of UPF0414 transmembrane protein C20orf30 OS=Homo sapiens GN=C20orf30                                   |           |        |
| Q96A65                 | EXOC4_HUMAN Exocyst complex component 4 OS=Homo sapiens GN=EXOC4 PE=1 SV=1                                                    |           | 64.65  |
| Q96A72                 | MGN2_HUMAN Protein mago nashi homolog 2 OS=Homo sapiens GN=MAGOHB PE=1 SV=1                                                   |           | 300.21 |
| Q96A73                 | K1191_HUMAN UPF0498 protein KIAA1191 OS=Homo sapiens GN=KIAA1191 PE=1 SV=1                                                    |           | 71.91  |
| Q96A73-2               | K1191_HUMAN Isoform 2 of UPF0498 protein KIAA1191 OS=Homo sapiens GN=KIAA1191                                                 |           | 71.91  |
| Q96A73-3               | K1191_HUMAN Isoform 3 of UPF0498 protein KIAA1191 OS=Homo sapiens GN=KIAA1191                                                 |           | 44.81  |
| Q96A84                 | EMID1_HUMAN EMI domain-containing protein 1 OS=Homo sapiens GN=EMID1 PE=2 SV=1                                                |           |        |
| Q96A84-2               | EMID1_HUMAN Isoform 2 of EMI domain-containing protein 1 OS=Homo sapiens GN=EMID1                                             |           |        |
| Q96A84-3               | EMID1_HUMAN Isoform 3 of EMI domain-containing protein 1 OS=Homo sapiens GN=EMID1                                             |           |        |
| Q96AB3                 | ISOC2_HUMAN Isochorismatase domain-containing protein 2, mitochondrial OS=Homo sapiens GN=ISOC2 PE=1 SV=1                     |           | 37.27  |
| Q96AB3-2               | ISOC2_HUMAN Isoform 2 of Isochorismatase domain-containing protein 2, mitochondrial OS=Homo sapiens GN=ISOC2                  |           | 37.27  |
| Q96AB3-2;Q96AB3;Q96AE2 | ISOC2_HUMAN Isoform 2 of Isochorismatase domain-containing protein 2, mitochondrial OS=Homo sapiens GN=ISOC2;>sp Q96AB3       | 3.87E-89  |        |
| Q96AB3-3               | ISOC2_HUMAN Isoform 3 of Isochorismatase domain-containing protein 2, mitochondrial OS=Homo sapiens GN=ISOC2                  |           | 24.86  |
| Q96AC1                 | FERM2_HUMAN Fermitin family homolog 2 OS=Homo sapiens GN=FERMT2 PE=1 SV=1                                                     |           | 345.81 |
| Q96AC1-2               | FERM2_HUMAN Isoform 2 of Fermitin family homolog 2 OS=Homo sapiens GN=FERMT2                                                  |           | 345.81 |
| Q96AC1;Q96AC1-2        | FERM2_HUMAN Fermitin family homolog 2 OS=Homo sapiens GN=FERMT2 PE=1 SV=1;>sp Q96AC1-2 FERM2_HUMAN Isoform 2 of Fermitin      | 2.53E-17  |        |
| Q96AE4                 | FUBP1_HUMAN Far upstream element-binding protein 1 OS=Homo sapiens GN=FUBP1 PE=1 SV=3                                         |           | 299.33 |
| Q96AE4-2               | FUBP1_HUMAN Isoform 2 of Far upstream element-binding protein 1 OS=Homo sapiens GN=FUBP1                                      |           | 293.93 |
| Q96AE4-2;Q96AE4        | FUBP1_HUMAN Isoform 2 of Far upstream element-binding protein 1 OS=Homo sapiens GN=FUBP1;>sp Q96AE4 FUBP1_HUMAN Far upstream  | 1.66E-212 |        |
| Q96AE4;Q96AE4-2        | FUBP1_HUMAN Far upstream element-binding protein 1 OS=Homo sapiens GN=FUBP1 PE=1 SV=3;>sp Q96AE4-2 FUBP1_HUMAN Isoform        | 0         |        |
| Q96AG4                 | LRC59_HUMAN Leucine-rich repeat-containing protein 59 OS=Homo sapiens GN=LRR59 PE=1 SV=1                                      |           | 720.26 |
| Q96AJ9-2;Q96AJ9        | VTI1A_HUMAN Isoform 2 of Vesicle transport through interaction with t-SNAREs homolog 1A OS=Homo sapiens GN=VTI1A;>sp Q96AJ9   | 1.94E-09  |        |
| Q96AK3                 | ABC3D_HUMAN Probable DNA dC->dU-editing enzyme APOBEC-3D OS=Homo sapiens GN=APOBEC3D PE=1 SV=1                                |           | 16.73  |
| Q96AP7                 | ESAM_HUMAN Endothelial cell-selective adhesion molecule OS=Homo sapiens GN=ESAM PE=1 SV=1                                     |           | 122.08 |
| Q96AQ8                 | CC90A_HUMAN Coiled-coil domain-containing protein 90A, mitochondrial OS=Homo sapiens GN=CCDC90A PE=2 SV=1                     |           |        |
| Q96AX1                 | VP33A_HUMAN Vacuolar protein sorting-associated protein 33A OS=Homo sapiens GN=VPS33A PE=1 SV=1                               |           |        |
| Q96AX2                 | RAB37_HUMAN Ras-related protein Rab-37 OS=Homo sapiens GN=RAB37 PE=1 SV=3                                                     |           | 70.52  |
| Q96AX2-2               | RAB37_HUMAN Isoform 2 of Ras-related protein Rab-37 OS=Homo sapiens GN=RAB37                                                  |           | 70.52  |
| Q96AY3                 | FKB10_HUMAN Peptidyl-prolyl cis-trans isomerase FKBP10 OS=Homo sapiens GN=FKBP10 PE=1 SV=1                                    | 2.04E-56  |        |
| Q96AZ6                 | ISG20_HUMAN Interferon-stimulated gene 20 kDa protein OS=Homo sapiens GN=ISG20 PE=1 SV=2                                      | 2.08E-19  |        |
| Q96B18                 | DACT3_HUMAN Dapper homolog 3 OS=Homo sapiens GN=DACT3 PE=2 SV=2                                                               |           |        |
| Q96B26                 | EXOS8_HUMAN Exosome complex component RRP43 OS=Homo sapiens GN=EXOSC8 PE=1 SV=1                                               |           | 33.21  |
| Q96B26;Q5JXM0          | EXOS8_HUMAN Exosome complex exonuclease RRP43 OS=Homo sapiens GN=EXOSC8 PE=1 SV=1;>tr Q5JXM0 Q5JXM0_HUMAN Putative            | 2.23E-19  |        |
| Q96B36;Q96B36-2        | AKT1_HUMAN Proline-rich AKT1 substrate 1 OS=Homo sapiens GN=AKT1S1 PE=1 SV=1;>sp Q96B36-2 AKT1_HUMAN Isoform 2 of AKT1        | 1.08E-13  |        |
| Q96B49                 | TOM6_HUMAN Mitochondrial import receptor subunit TOM6 homolog OS=Homo sapiens GN=TOM6 PE=1 SV=1                               | 3.63E-18  |        |
| Q96B54                 | ZNF428_HUMAN Zinc finger protein 428 OS=Homo sapiens GN=ZNF428 PE=1 SV=2                                                      | 1.23E-06  |        |
| Q96B97                 | SH3K1_HUMAN SH3 domain-containing kinase-binding protein 1 OS=Homo sapiens GN=SH3KBP1 PE=1 SV=2                               |           | 139.67 |
| Q96B97-2               | SH3K1_HUMAN Isoform 2 of SH3 domain-containing kinase-binding protein 1 OS=Homo sapiens GN=SH3KBP1                            |           | 139.67 |
| Q96B97;Q96B97-2        | SH3K1_HUMAN SH3 domain-containing kinase-binding protein 1 OS=Homo sapiens GN=SH3KBP1 PE=1 SV=2;>sp Q96B97-2 SH3K1_HUMAN      | 3.98E-10  |        |
| Q96BD8;Q96BD8-2        | SKA1_HUMAN Spindle and kinetochore-associated protein 1 OS=Homo sapiens GN=SKA1 PE=1 SV=1;>sp Q96BD8-2 SKA1_HUMAN Isoform     | 3.36E-24  |        |
| Q96BF6                 | NACC2_HUMAN Nucleus accumbens-associated protein 2 OS=Homo sapiens GN=NACC2 PE=2 SV=1                                         |           |        |



|                       |                                                                                                                         |          |        |
|-----------------------|-------------------------------------------------------------------------------------------------------------------------|----------|--------|
| Q96BI1                | S22AI_HUMAN Solute carrier family 22 member 18 OS=Homo sapiens GN=SLC22A18 PE=1 SV=3                                    | 8.49E-09 |        |
| Q96BJ3                | AIDA_HUMAN Axin interactor, dorsalization-associated protein OS=Homo sapiens GN=AIDA PE=1 SV=1                          |          |        |
| Q96BJ3-3              | AIDA_HUMAN Isoform 3 of Axin interactor, dorsalization-associated protein OS=Homo sapiens GN=AIDA                       |          |        |
| Q96BJ3;B7Z7D5;B7ZW30; | AIDA_HUMAN Axin interactor, dorsalization-associated protein OS=Homo sapiens GN=AIDA PE=1 SV=1;>tr B7Z7D5 B7Z7D5_HUMAN  | 1.53E-17 |        |
| Q96BM9                | ARL8A_HUMAN ADP-ribosylation factor-like protein 8A OS=Homo sapiens GN=ARL8A PE=1 SV=1                                  |          | 107.08 |
| Q96BN8                | F105B_HUMAN Protein FAM105B OS=Homo sapiens GN=FAM105B PE=1 SV=3                                                        |          |        |
| Q96BP2                | CHCH1_HUMAN Coiled-coil-helix-coiled-coil-helix domain-containing protein 1 OS=Homo sapiens GN=CHCH1 PE=1 SV=1          |          | 131.44 |
| Q96BP3                | PPWD1_HUMAN Peptidylprolyl isomerase domain and WD repeat-containing protein 1 OS=Homo sapiens GN=PPWD1 PE=1 SV=1       |          | 39     |
| Q96BR5                | SELR1_HUMAN Sel1 repeat-containing protein 1 OS=Homo sapiens GN=SELR1 PE=1 SV=2                                         |          | 64.47  |
| Q96BR9                | ZBT8A_HUMAN Zinc finger and BTB domain-containing protein 8A OS=Homo sapiens GN=ZBT8A PE=1 SV=2                         |          | 21.54  |
| Q96BR9-2              | ZBT8A_HUMAN Isoform 2 of Zinc finger and BTB domain-containing protein 8A OS=Homo sapiens GN=ZBT8A                      |          | 21.54  |
| Q96BW5;Q96BW5-2       | PTER_HUMAN Phosphotriesterase-related protein OS=Homo sapiens GN=PTER PE=1 SV=1;>sp Q96BW5-2 PTER_HUMAN Isoform 2 of    | 5.29E-10 |        |
| Q96BW9                | MMP37_HUMAN MMP37-like protein, mitochondrial OS=Homo sapiens GN=C3orf31 PE=2 SV=1                                      | 2.99E-22 |        |
| Q96BX8                | MOL2A_HUMAN Mps one binder kinase activator-like 2A OS=Homo sapiens GN=MOBK2A PE=1 SV=1                                 | 8.61E-10 |        |
| Q96BY2                | MOAP1_HUMAN Modulator of apoptosis 1 OS=Homo sapiens GN=MOAP1 PE=1 SV=1                                                 |          | 27.67  |
| Q96BY6                | DOC10_HUMAN Dedicator of cytokinesis protein 10 OS=Homo sapiens GN=DOCK10 PE=1 SV=3                                     |          |        |
| Q96BZ4                | PLD4_HUMAN Phospholipase D4 OS=Homo sapiens GN=PLD4 PE=1 SV=2                                                           | 4.39E-17 |        |
| Q96BZ8                | LENG1_HUMAN Leukocyte receptor cluster member 1 OS=Homo sapiens GN=LENG1 PE=1 SV=1                                      |          | 26.12  |
| Q96C01                | F136A_HUMAN Protein FAM136A OS=Homo sapiens GN=FAM136A PE=1 SV=1                                                        |          | 185.28 |
| Q96C19                | EFHD2_HUMAN EF-hand domain-containing protein D2 OS=Homo sapiens GN=EFHD2 PE=1 SV=1                                     |          | 246.45 |
| Q96C23                | GALM_HUMAN Aldose 1-epimerase OS=Homo sapiens GN=GALM PE=1 SV=1                                                         | 8.20E-41 |        |
| Q96C36                | P5CR2_HUMAN Pyrroline-5-carboxylate reductase 2 OS=Homo sapiens GN=PYCR2 PE=1 SV=1                                      |          | 225.48 |
| Q96C57                | CL043_HUMAN Uncharacterized protein C12orf43 OS=Homo sapiens GN=C12orf43 PE=1 SV=2                                      |          | 48.39  |
| Q96C86                | DCPS_HUMAN Scavenger mRNA-decapping enzyme DcpS OS=Homo sapiens GN=DCPS PE=1 SV=2                                       |          | 235.67 |
| Q96C90                | PP14B_HUMAN Protein phosphatase 1 regulatory subunit 14B OS=Homo sapiens GN=PPP1R14B PE=1 SV=3                          |          | 119.14 |
| Q96C92;Q96C92-2;Q96C9 | SDCG3_HUMAN Serologically defined colon cancer antigen 3 OS=Homo sapiens GN=SDCCAG3 PE=1 SV=3;>sp Q96C92-2 SDCG3_HU     | 2.92E-09 |        |
| Q96CB9                | NSUN4_HUMAN Putative methyltransferase NSUN4 OS=Homo sapiens GN=NSUN4 PE=1 SV=2                                         |          |        |
| Q96CB9-2              | NSUN4_HUMAN Isoform 2 of Putative methyltransferase NSUN4 OS=Homo sapiens GN=NSUN4                                      |          |        |
| Q96CB9-3              | NSUN4_HUMAN Isoform 3 of Putative methyltransferase NSUN4 OS=Homo sapiens GN=NSUN4                                      |          |        |
| Q96CD2;Q96CD2-2       | COAC_HUMAN Phosphopantothienylcysteine decarboxylase OS=Homo sapiens GN=PPCDC PE=1 SV=2;>sp Q96CD2-2 COAC_HUMAN         | 1.29E-08 |        |
| Q96CG8;C9JVR3;Q96CG8- | CTHR1_HUMAN Collagen triple helix repeat-containing protein 1 OS=Homo sapiens GN=CTHRC1 PE=1 SV=1;>tr C9JVR3 C9JVR3_HUI | 1.52E-29 |        |
| Q96CM8                | ACSF2_HUMAN Acyl-CoA synthetase family member 2, mitochondrial OS=Homo sapiens GN=ACSF2 PE=1 SV=2                       |          | 25.9   |
| Q96CN4                | EVI5L_HUMAN EVI5-like protein OS=Homo sapiens GN=EVI5L PE=1 SV=1                                                        |          |        |
| Q96CN7                | ISOC1_HUMAN Isochorismatase domain-containing protein 1 OS=Homo sapiens GN=ISOC1 PE=1 SV=3                              |          |        |
| Q96CN9                | GCC1_HUMAN GRIP and coiled-coil domain-containing protein 1 OS=Homo sapiens GN=GCC1 PE=1 SV=1                           | 9.50E-07 |        |
| Q96CP2                | FWCH2_HUMAN FLYWCH family member 2 OS=Homo sapiens GN=FLYWCH2 PE=1 SV=1                                                 | 2.94E-11 |        |
| Q96CS2                | HAUS1_HUMAN HAUS augmin-like complex subunit 1 OS=Homo sapiens GN=HAUS1 PE=1 SV=1                                       | 5.54E-12 |        |
| Q96CS3                | FAF2_HUMAN FAS-associated factor 2 OS=Homo sapiens GN=FAF2 PE=1 SV=2                                                    |          | 133.96 |
| Q96CT7                | CC124_HUMAN Coiled-coil domain-containing protein 124 OS=Homo sapiens GN=CCDC124 PE=1 SV=1                              |          | 584.31 |
| Q96CU9                | FXRD1_HUMAN FAD-dependent oxidoreductase domain-containing protein 1 OS=Homo sapiens GN=FOXRED1 PE=1 SV=2               |          |        |
| Q96CU9-2              | FXRD1_HUMAN Isoform 2 of FAD-dependent oxidoreductase domain-containing protein 1 OS=Homo sapiens GN=FOXRED1            |          |        |
| Q96CU9-3              | FXRD1_HUMAN Isoform 3 of FAD-dependent oxidoreductase domain-containing protein 1 OS=Homo sapiens GN=FOXRED1            |          |        |
| Q96CV9;Q96CV9-2;Q96CV | OPTN_HUMAN Optineurin OS=Homo sapiens GN=OPTN PE=1 SV=2;>sp Q96CV9-2 OPTN_HUMAN Isoform 2 of Optineurin OS=Homo         | 1.52E-21 |        |
| Q96CW1                | AP2M1_HUMAN AP-2 complex subunit mu OS=Homo sapiens GN=AP2M1 PE=1 SV=2                                                  |          | 782.26 |
| Q96CW1-2              | AP2M1_HUMAN Isoform 2 of AP-2 complex subunit mu OS=Homo sapiens GN=AP2M1                                               |          | 782.26 |
| Q96CW1;D3DNT1;Q96CW   | AP2M1_HUMAN AP-2 complex subunit mu OS=Homo sapiens GN=AP2M1 PE=1 SV=2;>tr D3DNT1 D3DNT1_HUMAN Adaptor-related p        | 3.29E-76 |        |
| Q96CW5;Q96CW5-2       | GCP3_HUMAN Gamma-tubulin complex component 3 OS=Homo sapiens GN=TUBGCP3 PE=1 SV=2;>sp Q96CW5-2 GCP3_HUMAN Iso           | 2.11E-14 |        |
| Q96CX2                | KCD12_HUMAN BTB/POZ domain-containing protein KCTD12 OS=Homo sapiens GN=KCTD12 PE=1 SV=1                                | 3.37E-49 |        |
| Q96D05                | CJ035_HUMAN Uncharacterized protein C10orf35 OS=Homo sapiens GN=C10orf35 PE=1 SV=1                                      | 3.18E-11 |        |
| Q96D15                | RCN3_HUMAN Reticulocalbin-3 OS=Homo sapiens GN=RCN3 PE=1 SV=1                                                           | 1.32E-46 |        |
| Q96D46                | NMD3_HUMAN 60S ribosomal export protein NMD3 OS=Homo sapiens GN=NMD3 PE=1 SV=1                                          |          |        |
| Q96D71;Q96D71-3;Q96D  | REPS1_HUMAN RalBP1-associated Eps domain-containing protein 1 OS=Homo sapiens GN=REPS1 PE=1 SV=3;>sp Q96D71-3 REPS1_    | 1.45E-05 |        |
| Q96D96                | HVCN1_HUMAN Voltage-gated hydrogen channel 1 OS=Homo sapiens GN=HVCN1 PE=1 SV=1                                         |          | 49.78  |
| Q96D96-2              | HVCN1_HUMAN Isoform 2 of Voltage-gated hydrogen channel 1 OS=Homo sapiens GN=HVCN1                                      |          | 13.09  |
| Q96D96-3              | HVCN1_HUMAN Isoform 3 of Voltage-gated hydrogen channel 1 OS=Homo sapiens GN=HVCN1                                      |          | 49.78  |
| Q96DA0                | ZG16B_HUMAN Zymogen granule protein 16 homolog B OS=Homo sapiens GN=ZG16B PE=1 SV=3                                     | 2.86E-13 |        |
| Q96DA2                | RB39B_HUMAN Ras-related protein Rab-39B OS=Homo sapiens GN=RAB39B PE=1 SV=1                                             |          | 61.85  |
| Q96DA6                | TIM14_HUMAN Mitochondrial import inner membrane translocase subunit TIM14 OS=Homo sapiens GN=DNAJC19 PE=1 SV=3          |          | 126.05 |
| Q96DB5                | RMD1_HUMAN Regulator of microtubule dynamics protein 1 OS=Homo sapiens GN=FAM82B PE=1 SV=1                              |          | 62.25  |
| Q96DC8;Q5W0J8;Q96DC8  | ECHDC3_HUMAN Enoyl-CoA hydratase domain-containing protein 3, mitochondrial OS=Homo sapiens GN=ECHDC3 PE=1 SV=2;>tr Q5W | 6.30E-20 |        |
| Q96DE0                | NUDT16_HUMAN U8 snoRNA-decapping enzyme OS=Homo sapiens GN=NUDT16 PE=1 SV=2                                             |          |        |

|                       |                                                                                                                                                   |            |        |
|-----------------------|---------------------------------------------------------------------------------------------------------------------------------------------------|------------|--------|
| Q96DG6                | CMBL_HUMAN Carboxymethylenebutenolidase homolog OS=Homo sapiens GN=CMBL PE=1 SV=1                                                                 | 1.13E-17   |        |
| Q96DH6                | MSI2H_HUMAN RNA-binding protein Musashi homolog 2 OS=Homo sapiens GN=MSI2 PE=1 SV=1                                                               |            |        |
| Q96DH6-2              | MSI2H_HUMAN Isoform 2 of RNA-binding protein Musashi homolog 2 OS=Homo sapiens GN=MSI2                                                            |            |        |
| Q96DH6-3              | MSI2H_HUMAN Isoform 3 of RNA-binding protein Musashi homolog 2 OS=Homo sapiens GN=MSI2                                                            |            |        |
| Q96DH6;B4DHE8;Q96DHE  | MSI2H_HUMAN RNA-binding protein Musashi homolog 2 OS=Homo sapiens GN=MSI2 PE=1 SV=1;>tr B4DHE8 B4DHE8_HUMAN cDNA                                  | 1.65E-58   |        |
| Q96DI7                | SNR40_HUMAN U5 small nuclear ribonucleoprotein 40 kDa protein OS=Homo sapiens GN=SNRNP40 PE=1 SV=1                                                |            |        |
| Q96DR7-3              | ARHGQ_HUMAN Isoform 2 of Rho guanine nucleotide exchange factor 26 OS=Homo sapiens GN=ARHGQ PE=1 SV=1                                             |            | 27.14  |
| Q96DT7                | ZBT10_HUMAN Zinc finger and BTB domain-containing protein 10 OS=Homo sapiens GN=ZBTB10 PE=1 SV=2                                                  |            |        |
| Q96DT7-2              | ZBT10_HUMAN Isoform 2 of Zinc finger and BTB domain-containing protein 10 OS=Homo sapiens GN=ZBTB10                                               |            |        |
| Q96DT7-3              | ZBT10_HUMAN Isoform 3 of Zinc finger and BTB domain-containing protein 10 OS=Homo sapiens GN=ZBTB10                                               |            |        |
| Q96DT7-4              | ZBT10_HUMAN Isoform 4 of Zinc finger and BTB domain-containing protein 10 OS=Homo sapiens GN=ZBTB10                                               |            |        |
| Q96DU9                | PABP5_HUMAN Polyadenylate-binding protein 5 OS=Homo sapiens GN=PABPC5 PE=1 SV=1                                                                   |            | 102.55 |
| Q96DV4                | RM38_HUMAN 39S ribosomal protein L38, mitochondrial OS=Homo sapiens GN=MRPL38 PE=1 SV=2                                                           |            | 85.7   |
| Q96DX7                | TRI44_HUMAN Tripartite motif-containing protein 44 OS=Homo sapiens GN=TRIM44 PE=1 SV=1                                                            |            |        |
| Q96DZ1-2              | ERLEC_HUMAN Isoform 2 of Endoplasmic reticulum lectin 1 OS=Homo sapiens GN=ERLEC1                                                                 |            | 0.83   |
| Q96DZ1;B5MC72;Q96DZ1  | ERLEC_HUMAN Endoplasmic reticulum lectin 1 OS=Homo sapiens GN=ERLEC1 PE=1 SV=1;>tr B5MC72 B5MC72_HUMAN Uncharacter                                | 1.75E-06   |        |
| Q96E11                | RRFM_HUMAN Ribosome-recycling factor, mitochondrial OS=Homo sapiens GN=MRRF PE=1 SV=1                                                             |            | 166.08 |
| Q96E11-2              | RRFM_HUMAN Isoform 2 of Ribosome-recycling factor, mitochondrial OS=Homo sapiens GN=MRRF                                                          |            | 70.97  |
| Q96E11-3              | RRFM_HUMAN Isoform 3 of Ribosome-recycling factor, mitochondrial OS=Homo sapiens GN=MRRF                                                          |            | 166.08 |
| Q96E11-4              | RRFM_HUMAN Isoform 4 of Ribosome-recycling factor, mitochondrial OS=Homo sapiens GN=MRRF                                                          |            | 31.71  |
| Q96E11-5              | RRFM_HUMAN Isoform 5 of Ribosome-recycling factor, mitochondrial OS=Homo sapiens GN=MRRF                                                          |            | 31.71  |
| Q96E11-6              | RRFM_HUMAN Isoform 6 of Ribosome-recycling factor, mitochondrial OS=Homo sapiens GN=MRRF                                                          |            | 31.71  |
| Q96E11-7              | RRFM_HUMAN Isoform 7 of Ribosome-recycling factor, mitochondrial OS=Homo sapiens GN=MRRF                                                          |            | 31.71  |
| Q96E11;Q96E11-3;B7Z6P | RRFM_HUMAN Ribosome-recycling factor, mitochondrial OS=Homo sapiens GN=MRRF PE=1 SV=1;>sp Q96E11-3 RRFM_HUMAN Isofo                               | 5.59E-51   |        |
| Q96E17                | RAB3C_HUMAN Ras-related protein Rab-3C OS=Homo sapiens GN=RAB3C PE=2 SV=1                                                                         |            | 90.26  |
| Q96E29                | MTER1_HUMAN mTERF domain-containing protein 1, mitochondrial OS=Homo sapiens GN=MTERFD1 PE=1 SV=2                                                 |            |        |
| Q96E29-2              | MTER1_HUMAN Isoform 2 of mTERF domain-containing protein 1, mitochondrial OS=Homo sapiens GN=MTERFD1                                              |            |        |
| Q96E39                | RBMXL_HUMAN Heterogeneous nuclear ribonucleoprotein G-like 1 OS=Homo sapiens GN=RBMXL1 PE=1 SV=1                                                  |            | 226.35 |
| Q96EB1-2;B1B1I7;B4E3W | 2 ELP4_HUMAN Isoform 2 of Elongator complex protein 4 OS=Homo sapiens GN=ELP4;>tr B1B1I7 B1B1I7_HUMAN Elongation proteir                          | 1.04E-12   |        |
| Q96EE3-1;Q96EE3       | 1 SEH1_HUMAN Isoform B of Nucleoporin SEH1 OS=Homo sapiens GN=SEH1L;>sp Q96EE3 SEH1_HUMAN Nucleoporin SEH1 OS=Hor                                 | 6.08E-06   |        |
| Q96EI5-2;Q96EI5       | 2 TCAL4_HUMAN Isoform 2 of Transcription elongation factor A protein-like 4 OS=Homo sapiens GN=TCEAL4;>sp Q96EI5 TCAL4_HUM                        | 6.45E-24   |        |
| Q96EK5                | KBP_HUMAN KIF1-binding protein OS=Homo sapiens GN=KIAA1279 PE=1 SV=1                                                                              | 5.19E-246  |        |
| Q96EK6                | GNA1_HUMAN Glucosamine 6-phosphate N-acetyltransferase OS=Homo sapiens GN=GNPNAT1 PE=1 SV=1                                                       |            | 48.76  |
| Q96EK7;Q96EK7-2       | F120B_HUMAN Constitutive coactivator of peroxisome proliferator-activated receptor gamma OS=Homo sapiens GN=FAM120B PE=1 S                        | 2.95E-12   |        |
| Q96EL2                | RT24_HUMAN 28S ribosomal protein S24, mitochondrial OS=Homo sapiens GN=MRPS24 PE=1 SV=1                                                           |            | 31.13  |
| Q96EL3                | RM53_HUMAN 39S ribosomal protein L53, mitochondrial OS=Homo sapiens GN=MRPL53 PE=1 SV=1                                                           |            | 160.87 |
| Q96EN8                | MOCOS_HUMAN Molybdenum cofactor sulfurase OS=Homo sapiens GN=MOCOS PE=1 SV=2                                                                      |            |        |
| Q96EP0                | RNF31_HUMAN RING finger protein 31 OS=Homo sapiens GN=RNF31 PE=1 SV=1                                                                             | 7.23E-06   |        |
| Q96EP5                | DAZP1_HUMAN DAZ-associated protein 1 OS=Homo sapiens GN=DAZAP1 PE=1 SV=1                                                                          |            | 70.89  |
| Q96EP5-2              | DAZP1_HUMAN Isoform 2 of DAZ-associated protein 1 OS=Homo sapiens GN=DAZAP1                                                                       |            | 70.89  |
| Q96EP5;Q96EP5-2       | DAZP1_HUMAN DAZ-associated protein 1 OS=Homo sapiens GN=DAZAP1 PE=1 SV=1;>sp Q96EP5-2 DAZP1_HUMAN Isoform 2 of DA                                 | 1.74E-149  |        |
| Q96EQ0                | SGTB_HUMAN Small glutamine-rich tetratricopeptide repeat-containing protein beta OS=Homo sapiens GN=SGTB PE=1 SV=1                                | 0.00011412 |        |
| Q96ER3                | SAAL1_HUMAN Protein SAAL1 OS=Homo sapiens GN=SAAL1 PE=1 SV=2                                                                                      | 8.18E-14   |        |
| Q96ES7                | SGF29_HUMAN SAGA-associated factor 29 homolog OS=Homo sapiens GN=CCDC101 PE=1 SV=1                                                                |            |        |
| Q96EY1                | DNJA3_HUMAN DnaJ homolog subfamily A member 3, mitochondrial OS=Homo sapiens GN=DNAJA3 PE=1 SV=2                                                  |            |        |
| Q96EY1-2              | DNJA3_HUMAN Isoform 2 of DnaJ homolog subfamily A member 3, mitochondrial OS=Homo sapiens GN=DNAJA3                                               |            |        |
| Q96EY1;Q96EY1-2       | DNJA3_HUMAN DnaJ homolog subfamily A member 3, mitochondrial OS=Homo sapiens GN=DNAJA3 PE=1 SV=2;>sp Q96EY1-2 DNJA                                | 1.99E-08   |        |
| Q96EY4                | CD043_HUMAN UPF0534 protein C4orf43 OS=Homo sapiens GN=C4orf43 PE=1 SV=2                                                                          |            | 73.85  |
| Q96EY5;Q96EY5-3;Q96EY | F125A_HUMAN Multivesicular body subunit 12A OS=Homo sapiens GN=FAM125A PE=1 SV=1;>sp Q96EY5-3 F125A_HUMAN Isoform :                               | 9.16E-56   |        |
| Q96EY7                | PTCD3_HUMAN Pentatricopeptide repeat-containing protein 3, mitochondrial OS=Homo sapiens GN=PTCD3 PE=1 SV=3                                       |            | 150.68 |
| Q96EY8                | MMAB_HUMAN Cob(I)yrinic acid a,c-diamide adenosyltransferase, mitochondrial OS=Homo sapiens GN=MMAB PE=1 SV=1                                     |            | 66.06  |
| Q96F07                | CYFP2_HUMAN Cytoplasmic FMR1-interacting protein 2 OS=Homo sapiens GN=CYFIP2 PE=1 SV=2                                                            |            | 94.24  |
| Q96F07-2              | CYFP2_HUMAN Isoform 2 of Cytoplasmic FMR1-interacting protein 2 OS=Homo sapiens GN=CYFIP2                                                         |            | 94.24  |
| Q96F07;Q96F07-2       | CYFP2_HUMAN Cytoplasmic FMR1-interacting protein 2 OS=Homo sapiens GN=CYFIP2 PE=1 SV=2;>sp Q96F07-2 CYFP2_HUMAN Isof                              | 1.21E-50   |        |
| Q96F44                | TRI11_HUMAN E3 ubiquitin-protein ligase TRIM11 OS=Homo sapiens GN=TRIM11 PE=1 SV=2                                                                |            | 28.2   |
| Q96F44-2              | TRI11_HUMAN Isoform 2 of E3 ubiquitin-protein ligase TRIM11 OS=Homo sapiens GN=TRIM11                                                             |            | 28.03  |
| Q96F44-3              | TRI11_HUMAN Isoform 3 of E3 ubiquitin-protein ligase TRIM11 OS=Homo sapiens GN=TRIM11                                                             |            | 23.22  |
| Q96F85;B8ZZB8;Q96F85- | CNRP1_HUMAN CB1 cannabinoid receptor-interacting protein 1 OS=Homo sapiens GN=CNRIP1 PE=1 SV=1;>tr B8ZZB8 B8ZZB8_HUM                              | 1.46E-22   |        |
| Q96F86                | EDC3_HUMAN Enhancer of mRNA-decapping protein 3 OS=Homo sapiens GN=EDC3 PE=1 SV=1                                                                 | 1.48E-08   |        |
| Q96FA3                | PELI1_HUMAN Protein pellino homolog 1 OS=Homo sapiens GN=PELI1 PE=1 SV=2                                                                          |            |        |
| Q96FE5                | LIGO1_HUMAN Leucine-rich repeat and immunoglobulin-like domain-containing nogo receptor-interacting protein 1 OS=Homo sapiens GN=LINGO1 PE=1 SV=2 |            |        |

|                          |                                                                                                                                                      |           |        |
|--------------------------|------------------------------------------------------------------------------------------------------------------------------------------------------|-----------|--------|
| Q96FE5-2                 | LIGO1_HUMAN Isoform 2 of Leucine-rich repeat and immunoglobulin-like domain-containing nogo receptor-interacting protein 1 OS=Homo sapiens GN=LINGO1 |           |        |
| Q96FF9                   | CDCA5_HUMAN Sororin OS=Homo sapiens GN=CDCA5 PE=1 SV=1                                                                                               |           |        |
| Q96FJ0                   | STALP_HUMAN AMSH-like protease OS=Homo sapiens GN=STAMBPL1 PE=1 SV=2                                                                                 |           | 168.59 |
| Q96FJ0-2                 | STALP_HUMAN Isoform 2 of AMSH-like protease OS=Homo sapiens GN=STAMBPL1                                                                              |           | 168.59 |
| Q96FJ0-2;B3KS69;Q96FJ0-2 | STALP_HUMAN Isoform 2 of AMSH-like protease OS=Homo sapiens GN=STAMBPL1;>tr B3KS69 B3KS69_HUMAN cDNA FLJ35627 fis                                    | 3.30E-19  |        |
| Q96FJ0;Q96FJ0-2          | STALP_HUMAN AMSH-like protease OS=Homo sapiens GN=STAMBPL1 PE=1 SV=2;>sp Q96FJ0-2 STALP_HUMAN Isoform 2 of AMSH-li                                   | 9.65E-24  |        |
| Q96FJ2                   | DYL2_HUMAN Dynein light chain 2, cytoplasmic OS=Homo sapiens GN=DYNLL2 PE=1 SV=1                                                                     |           | 200.19 |
| Q96FN4                   | CPNE2_HUMAN Copine-2 OS=Homo sapiens GN=CPNE2 PE=1 SV=3                                                                                              |           |        |
| Q96FN9                   | DTD2_HUMAN Probable D-tyrosyl-tRNA(Tyr) deacylase 2 OS=Homo sapiens GN=C14orf126 PE=2 SV=1                                                           |           | 30.24  |
| Q96FQ6                   | S10AG_HUMAN Protein S100-A16 OS=Homo sapiens GN=S100A16 PE=1 SV=1                                                                                    |           | 210.5  |
| Q96FS4                   | SIPA1_HUMAN Signal-induced proliferation-associated protein 1 OS=Homo sapiens GN=SIPA1 PE=1 SV=1                                                     |           | 27.87  |
| Q96FV2                   | SCRN2_HUMAN Secernin-2 OS=Homo sapiens GN=SCRN2 PE=2 SV=3                                                                                            | 3.64E-06  |        |
| Q96FV9                   | THOC1_HUMAN THO complex subunit 1 OS=Homo sapiens GN=THOC1 PE=1 SV=1                                                                                 |           |        |
| Q96FV9-2                 | THOC1_HUMAN Isoform 2 of THO complex subunit 1 OS=Homo sapiens GN=THOC1                                                                              |           |        |
| Q96FV9-3                 | THOC1_HUMAN Isoform 3 of THO complex subunit 1 OS=Homo sapiens GN=THOC1                                                                              |           |        |
| Q96FV9;Q96FV9-2          | THOC1_HUMAN THO complex subunit 1 OS=Homo sapiens GN=THOC1 PE=1 SV=1;>sp Q96FV9-2 THOC1_HUMAN Isoform 2 of THO (                                     | 1.35E-07  |        |
| Q96FW1                   | OTUB1_HUMAN Ubiquitin thioesterase OTUB1 OS=Homo sapiens GN=OTUB1 PE=1 SV=2                                                                          |           | 210.25 |
| Q96FW1-2                 | OTUB1_HUMAN Isoform 2 of Ubiquitin thioesterase OTUB1 OS=Homo sapiens GN=OTUB1                                                                       |           | 63.46  |
| Q96FW1;Q96FW1-2          | OTUB1_HUMAN Ubiquitin thioesterase OTUB1 OS=Homo sapiens GN=OTUB1 PE=1 SV=2;>sp Q96FW1-2 OTUB1_HUMAN Isoform 2 of                                    | 1.09E-188 |        |
| Q96FX7                   | TRM61_HUMAN tRNA (adenine-N(1)-)-methyltransferase catalytic subunit TRMT61A OS=Homo sapiens GN=TRMT61A PE=1 SV=1                                    |           | 103.95 |
| Q96FX7-2;Q96FX7;Q96B3-2  | TRM61_HUMAN Isoform 2 of tRNA (adenine-N(1)-)-methyltransferase catalytic subunit TRMT61A OS=Homo sapiens GN=TRMT61A;>                               | 9.90E-09  |        |
| Q96FZ2                   | CC037_HUMAN UPF0361 protein C3orf37 OS=Homo sapiens GN=C3orf37 PE=1 SV=1                                                                             | 1.13E-05  |        |
| Q96FZ7                   | CHMP6_HUMAN Charged multivesicular body protein 6 OS=Homo sapiens GN=CHMP6 PE=1 SV=3                                                                 |           | 137.2  |
| Q96G03                   | PGM2_HUMAN Phosphoglucomutase-2 OS=Homo sapiens GN=PGM2 PE=1 SV=4                                                                                    |           | 41.06  |
| Q96G21                   | IMP4_HUMAN U3 small nucleolar ribonucleoprotein protein IMP4 OS=Homo sapiens GN=IMP4 PE=1 SV=1                                                       |           |        |
| Q96G23                   | LASS2_HUMAN LAG1 longevity assurance homolog 2 OS=Homo sapiens GN=LASS2 PE=1 SV=1                                                                    |           | 304.33 |
| Q96G28                   | CC104_HUMAN Coiled-coil domain-containing protein 104 OS=Homo sapiens GN=CCDC104 PE=1 SV=2                                                           |           |        |
| Q96G28-2                 | CC104_HUMAN Isoform 2 of Coiled-coil domain-containing protein 104 OS=Homo sapiens GN=CCDC104                                                        |           |        |
| Q96G74                   | OTUD5_HUMAN OTU domain-containing protein 5 OS=Homo sapiens GN=OTUD5 PE=1 SV=1                                                                       |           |        |
| Q96G74-2                 | OTUD5_HUMAN Isoform 2 of OTU domain-containing protein 5 OS=Homo sapiens GN=OTUD5                                                                    |           |        |
| Q96G74-3                 | OTUD5_HUMAN Isoform 3 of OTU domain-containing protein 5 OS=Homo sapiens GN=OTUD5                                                                    |           |        |
| Q96GA3                   | LTV1_HUMAN Protein LTV1 homolog OS=Homo sapiens GN=LTV1 PE=1 SV=1                                                                                    | 2.99E-06  |        |
| Q96GA7                   | SDSL_HUMAN Serine dehydratase-like OS=Homo sapiens GN=SDSL PE=1 SV=1                                                                                 | 5.96E-17  |        |
| Q96GC5                   | RM48_HUMAN 39S ribosomal protein L48, mitochondrial OS=Homo sapiens GN=MRPL48 PE=1 SV=2                                                              |           | 111.99 |
| Q96GC9                   | VMP1_HUMAN Vacuole membrane protein 1 OS=Homo sapiens GN=VMP1 PE=1 SV=1                                                                              |           | 72.19  |
| Q96GD0                   | PLPP_HUMAN Pyridoxal phosphate phosphatase OS=Homo sapiens GN=PDXP PE=1 SV=2                                                                         |           |        |
| Q96GD4                   | AURKB_HUMAN Serine/threonine-protein kinase 12 OS=Homo sapiens GN=AURKB PE=1 SV=3                                                                    |           |        |
| Q96GG9                   | DCNL1_HUMAN DCN1-like protein 1 OS=Homo sapiens GN=DCUN1D1 PE=1 SV=1                                                                                 |           | 136.2  |
| Q96GJ1;Q96GJ1-2;Q96GJ1-3 | TRM2_HUMAN tRNA (uracil-5-)-methyltransferase homolog OS=Homo sapiens GN=TRMT2B PE=2 SV=1;>sp Q96GJ1-2 TRM2_HUMAN                                    | 8.67E-05  |        |
| Q96GK7;Q6P2I3            | FAH2A_HUMAN Fumarylacetoacetate hydrolase domain-containing protein 2A OS=Homo sapiens GN=FAHD2A PE=1 SV=1;>sp Q6P2I3                                | 3.76E-42  |        |
| Q96GM5                   | SMRD1_HUMAN SWI/SNF-related matrix-associated actin-dependent regulator of chromatin subfamily D member 1 OS=Homo sapiens GN=SMARCD1 PE=1 SV=2       |           |        |
| Q96GM5-2                 | SMRD1_HUMAN Isoform 2 of SWI/SNF-related matrix-associated actin-dependent regulator of chromatin subfamily D member 1 OS=Homo sapiens GN=SMARCD1    |           |        |
| Q96GM5;Q96GM5-2          | SMRD1_HUMAN SWI/SNF-related matrix-associated actin-dependent regulator of chromatin subfamily D member 1 OS=Homo sapiens                            | 1.00E-10  |        |
| Q96GM8                   | TOE1_HUMAN Target of EGR1 protein 1 OS=Homo sapiens GN=TOE1 PE=1 SV=1                                                                                |           |        |
| Q96GQ7                   | DDX27_HUMAN Probable ATP-dependent RNA helicase DDX27 OS=Homo sapiens GN=DDX27 PE=1 SV=2                                                             |           |        |
| Q96GW7                   | PGCB_HUMAN Brevican core protein OS=Homo sapiens GN=BCAN PE=1 SV=2                                                                                   |           |        |
| Q96GW7-2                 | PGCB_HUMAN Isoform 2 of Brevican core protein OS=Homo sapiens GN=BCAN                                                                                |           |        |
| Q96GW9                   | SYMM_HUMAN Methionyl-tRNA synthetase, mitochondrial OS=Homo sapiens GN=MARS2 PE=1 SV=2                                                               | 6.97E-08  |        |
| Q96GX5;Q96GX5-3;Q96GX5-4 | GWL_HUMAN Serine/threonine-protein kinase greatwall OS=Homo sapiens GN=MASTL PE=1 SV=1;>sp Q96GX5-3 GWL_HUMAN Isofo                                  | 4.81E-05  |        |
| Q96GX9                   | MTNB_HUMAN Probable methylthioribulose-1-phosphate dehydratase OS=Homo sapiens GN=APIP PE=1 SV=1                                                     | 1.58E-18  |        |
| Q96H12                   | CI030_HUMAN UPF0439 protein C9orf30 OS=Homo sapiens GN=C9orf30 PE=1 SV=1                                                                             |           | 32.05  |
| Q96H15                   | TIMD4_HUMAN T-cell immunoglobulin and mucin domain-containing protein 4 OS=Homo sapiens GN=TIMD4 PE=1 SV=2                                           |           |        |
| Q96H20;Q96H20-2          | SNF8_HUMAN Vacuolar-sorting protein SNF8 OS=Homo sapiens GN=SNF8 PE=1 SV=1;>sp Q96H20-2 SNF8_HUMAN Isoform 2 of Vac                                  | 2.24E-08  |        |
| Q96H55                   | MYO19_HUMAN Myosin-XIX OS=Homo sapiens GN=MYO19 PE=2 SV=2                                                                                            |           | 28.5   |
| Q96H55-2                 | MYO19_HUMAN Isoform 2 of Myosin-XIX OS=Homo sapiens GN=MYO19                                                                                         |           |        |
| Q96H55-3                 | MYO19_HUMAN Isoform 3 of Myosin-XIX OS=Homo sapiens GN=MYO19                                                                                         |           |        |
| Q96H55-4                 | MYO19_HUMAN Isoform 4 of Myosin-XIX OS=Homo sapiens GN=MYO19                                                                                         |           | 28.5   |
| Q96H79                   | ZCCHL_HUMAN Zinc finger CCCH-type antiviral protein 1-like OS=Homo sapiens GN=ZC3HAV1L PE=1 SV=2                                                     |           |        |
| Q96H79-2                 | ZCCHL_HUMAN Isoform 2 of Zinc finger CCCH-type antiviral protein 1-like OS=Homo sapiens GN=ZC3HAV1L                                                  |           |        |
| Q96HA9                   | PX11C_HUMAN Peroxisomal membrane protein 11C OS=Homo sapiens GN=PEX11G PE=1 SV=1                                                                     | 1.64E-06  |        |
| Q96HC4                   | PDLI5_HUMAN PDZ and LIM domain protein 5 OS=Homo sapiens GN=PDLIM5 PE=1 SV=5                                                                         |           |        |

|                      |                                                                                                                          |          |        |
|----------------------|--------------------------------------------------------------------------------------------------------------------------|----------|--------|
| Q96HC4-4             | PDLI5_HUMAN Isoform 4 of PDZ and LIM domain protein 5 OS=Homo sapiens GN=PDLIM5                                          |          |        |
| Q96HC4;Q96HC4-4      | PDLI5_HUMAN PDZ and LIM domain protein 5 OS=Homo sapiens GN=PDLIM5 PE=1 SV=5;>sp Q96HC4-4 PDLI5_HUMAN Isoform 4 of       | 2.40E-34 | 712.63 |
| Q96HE7               | ERO1A_HUMAN ERO1-like protein alpha OS=Homo sapiens GN=ERO1L PE=1 SV=2                                                   |          |        |
| Q96HE9               | PRR11_HUMAN Proline-rich protein 11 OS=Homo sapiens GN=PRR11 PE=1 SV=1                                                   |          |        |
| Q96HF1               | SFRP2_HUMAN Secreted frizzled-related protein 2 OS=Homo sapiens GN=SFRP2 PE=1 SV=2                                       | 1.98E-07 |        |
| Q96HJ9               | CG055_HUMAN UPF0562 protein C7orf55 OS=Homo sapiens GN=C7orf55 PE=1 SV=2                                                 | 4.81E-14 |        |
| Q96HNN2              | SAHH3_HUMAN Putative adenosylhomocysteinase 3 OS=Homo sapiens GN=AHCYL2 PE=1 SV=1                                        |          |        |
| Q96HNN2-2            | SAHH3_HUMAN Isoform 2 of Putative adenosylhomocysteinase 3 OS=Homo sapiens GN=AHCYL2                                     |          |        |
| Q96HNN2;Q96HNN2-2    | SAHH3_HUMAN Putative adenosylhomocysteinase 3 OS=Homo sapiens GN=AHCYL2 PE=1 SV=1;>sp Q96HNN2-2 SAHH3_HUMAN Isofo        | 5.55E-24 |        |
| Q96HQ0               | ZN419_HUMAN Zinc finger protein 419 OS=Homo sapiens GN=ZNF419 PE=2 SV=2                                                  |          |        |
| Q96HQ0-2             | ZN419_HUMAN Isoform 2 of Zinc finger protein 419 OS=Homo sapiens GN=ZNF419                                               |          |        |
| Q96HQ2               | C2AIL_HUMAN CDKN2AIP N-terminal-like protein OS=Homo sapiens GN=CDKN2AIPNL PE=1 SV=1                                     |          | 110.12 |
| Q96HQ2-2             | C2AIL_HUMAN Isoform 2 of CDKN2AIP N-terminal-like protein OS=Homo sapiens GN=CDKN2AIPNL                                  |          | 110.12 |
| Q96HR3               | MED30_HUMAN Mediator of RNA polymerase II transcription subunit 30 OS=Homo sapiens GN=MED30 PE=1 SV=1                    |          | 103.77 |
| Q96HR8               | NAF1_HUMAN H/ACA ribonucleoprotein complex non-core subunit NAF1 OS=Homo sapiens GN=NAF1 PE=1 SV=2                       | 1.17E-08 |        |
| Q96HR9               | REEP6_HUMAN Receptor expression-enhancing protein 6 OS=Homo sapiens GN=REEP6 PE=1 SV=1                                   |          | 28.79  |
| Q96HS1               | PGAM5_HUMAN Serine/threonine-protein phosphatase PGAM5, mitochondrial OS=Homo sapiens GN=PGAM5 PE=1 SV=2                 |          | 251.42 |
| Q96HS1-2             | PGAM5_HUMAN Isoform 2 of Serine/threonine-protein phosphatase PGAM5, mitochondrial OS=Homo sapiens GN=PGAM5              |          | 221.2  |
| Q96HS1;Q96HS1-2      | PGAM5_HUMAN Serine/threonine-protein phosphatase PGAM5, mitochondrial OS=Homo sapiens GN=PGAM5 PE=1 SV=2;>sp Q96HS1      | 4.94E-50 |        |
| Q96HU1               | SGSM3_HUMAN Small G protein signaling modulator 3 OS=Homo sapiens GN=SGSM3 PE=1 SV=1                                     |          |        |
| Q96HU1-2             | SGSM3_HUMAN Isoform 2 of Small G protein signaling modulator 3 OS=Homo sapiens GN=SGSM3                                  |          |        |
| Q96HW7               | INT4_HUMAN Integrator complex subunit 4 OS=Homo sapiens GN=INTS4 PE=1 SV=2                                               |          |        |
| Q96HW7-2             | INT4_HUMAN Isoform 2 of Integrator complex subunit 4 OS=Homo sapiens GN=INTS4                                            |          |        |
| Q96HW7-3             | INT4_HUMAN Isoform 3 of Integrator complex subunit 4 OS=Homo sapiens GN=INTS4                                            |          |        |
| Q96HY6               | DDRKG_HUMAN DDRGK domain-containing protein 1 OS=Homo sapiens GN=DDRGK1 PE=1 SV=2                                        |          |        |
| Q96HY6-2             | DDRKG_HUMAN Isoform 2 of DDRGK domain-containing protein 1 OS=Homo sapiens GN=DDRGK1                                     |          |        |
| Q96HY6;Q96HY6-2      | DDRKG_HUMAN DDRGK domain-containing protein 1 OS=Homo sapiens GN=DDRGK1 PE=1 SV=2;>sp Q96HY6-2 DDRKG_HUMAN Isc           | 3.46E-25 |        |
| Q96HY7               | DHTK1_HUMAN Probable 2-oxoglutarate dehydrogenase E1 component DHKTD1, mitochondrial OS=Homo sapiens GN=DHTKD1 PE=2 SV=2 |          |        |
| Q96HZ4               | HES6_HUMAN Transcription cofactor HES-6 OS=Homo sapiens GN=HES6 PE=1 SV=1                                                |          |        |
| Q96HZ4-2             | HES6_HUMAN Isoform 2 of Transcription cofactor HES-6 OS=Homo sapiens GN=HES6                                             |          |        |
| Q96HZ4-3             | HES6_HUMAN Isoform 3 of Transcription cofactor HES-6 OS=Homo sapiens GN=HES6                                             |          |        |
| Q96I15               | SCLY_HUMAN Selenocysteine lyase OS=Homo sapiens GN=SCLY PE=1 SV=2                                                        |          | 40.13  |
| Q96I15-2             | SCLY_HUMAN Isoform 2 of Selenocysteine lyase OS=Homo sapiens GN=SCLY                                                     |          | 40.13  |
| Q96I24               | FUBP3_HUMAN Far upstream element-binding protein 3 OS=Homo sapiens GN=FUBP3 PE=1 SV=2                                    |          | 281.28 |
| Q96I24-2             | FUBP3_HUMAN Isoform 2 of Far upstream element-binding protein 3 OS=Homo sapiens GN=FUBP3                                 |          | 146.2  |
| Q96I25               | SPF45_HUMAN Splicing factor 45 OS=Homo sapiens GN=RBM17 PE=1 SV=1                                                        |          |        |
| Q96I36               | CL062_HUMAN Uncharacterized protein C12orf62 OS=Homo sapiens GN=C12orf62 PE=2 SV=1                                       |          |        |
| Q96I59               | SYNM_HUMAN Probable asparaginyl-tRNA synthetase, mitochondrial OS=Homo sapiens GN=NARS2 PE=1 SV=3                        | 4.67E-37 |        |
| Q96I99               | SUCB2_HUMAN Succinyl-CoA ligase [GDP-forming] subunit beta, mitochondrial OS=Homo sapiens GN=SUCLG2 PE=1 SV=2            |          | 171.86 |
| Q96IF1               | JUB_HUMAN Protein ajuba OS=Homo sapiens GN=JUB PE=1 SV=1                                                                 |          |        |
| Q96IJ6-2;Q96IJ6      | 2 GMPPA_HUMAN Isoform 2 of Mannose-1-phosphate guanyltransferase alpha OS=Homo sapiens GN=GMPPA;>sp Q96IJ6 GMPPA_HU      | 9.74E-14 |        |
| Q96IS3               | RAX2_HUMAN Retina and anterior neural fold homeobox protein 2 OS=Homo sapiens GN=RAX2 PE=1 SV=1                          |          |        |
| Q96IU4               | ABHEB_HUMAN Abhydrolase domain-containing protein 14B OS=Homo sapiens GN=ABHD14B PE=1 SV=1                               |          | 37.79  |
| Q96IU4-2             | 2 ABHEB_HUMAN Isoform 2 of Abhydrolase domain-containing protein 14B OS=Homo sapiens GN=ABHD14B                          | 1.14E-25 |        |
| Q96IU4;B4DNR3;A6NGU1 | ABHEB_HUMAN Abhydrolase domain-containing protein 14B OS=Homo sapiens GN=ABHD14B PE=1 SV=1;>tr B4DNR3 B4DNR3_HUM         | 2.37E-38 |        |
| Q96IX5               | USMG5_HUMAN Up-regulated during skeletal muscle growth protein 5 OS=Homo sapiens GN=USMG5 PE=1 SV=1                      |          | 51.27  |
| Q96IY4               | CBPB2_HUMAN Carboxypeptidase B2 OS=Homo sapiens GN=CPB2 PE=1 SV=2                                                        |          | 21.6   |
| Q96IY4-2             | CBPB2_HUMAN Isoform 2 of Carboxypeptidase B2 OS=Homo sapiens GN=CPB2                                                     |          | 16.61  |
| Q96IZ0               | PAWR_HUMAN PRKC apoptosis WT1 regulator protein OS=Homo sapiens GN=PAWR PE=1 SV=1                                        |          | 91.4   |
| Q96IZ5               | RBM41_HUMAN RNA-binding protein 41 OS=Homo sapiens GN=RBM41 PE=1 SV=2                                                    |          | 26.07  |
| Q96IZ5-2             | RBM41_HUMAN Isoform 2 of RNA-binding protein 41 OS=Homo sapiens GN=RBM41                                                 |          | 26.07  |
| Q96J01               | THOC3_HUMAN THO complex subunit 3 OS=Homo sapiens GN=THOC3 PE=1 SV=1                                                     |          |        |
| Q96J02;Q96J02-2      | ITCH_HUMAN E3 ubiquitin-protein ligase Itchy homolog OS=Homo sapiens GN=ITCH PE=1 SV=2;>sp Q96J02-2 ITCH_HUMAN Isofo     | 4.48E-47 |        |
| Q96J65               | MRP9_HUMAN Multidrug resistance-associated protein 9 OS=Homo sapiens GN=ABCC12 PE=1 SV=2                                 |          |        |
| Q96J65-2             | MRP9_HUMAN Isoform 2 of Multidrug resistance-associated protein 9 OS=Homo sapiens GN=ABCC12                              |          |        |
| Q96J65-3             | MRP9_HUMAN Isoform 3 of Multidrug resistance-associated protein 9 OS=Homo sapiens GN=ABCC12                              |          |        |
| Q96J65-5             | MRP9_HUMAN Isoform 5 of Multidrug resistance-associated protein 9 OS=Homo sapiens GN=ABCC12                              |          |        |
| Q96J87               | CELF6_HUMAN CUGBP Elav-like family member 6 OS=Homo sapiens GN=CELF6 PE=1 SV=1                                           |          |        |
| Q96JB1               | DYH8_HUMAN Dynein heavy chain 8, axonemal OS=Homo sapiens GN=DNAH8 PE=1 SV=2                                             |          |        |
| Q96JB1-2             | DYH8_HUMAN Isoform 2 of Dynein heavy chain 8, axonemal OS=Homo sapiens GN=DNAH8                                          |          |        |
| Q96JB1;Q96JB1-2      | DYH8_HUMAN Dynein heavy chain 8, axonemal OS=Homo sapiens GN=DNAH8 PE=1 SV=2;>sp Q96JB1-2 DYH8_HUMAN Isoform 2 of        | 5.39E-14 |        |

|                         |                                                                                                                            |           |        |
|-------------------------|----------------------------------------------------------------------------------------------------------------------------|-----------|--------|
| Q96JB2;Q96JB2-2         | COG3_HUMAN Conserved oligomeric Golgi complex subunit 3 OS=Homo sapiens GN=COG3 PE=1 SV=3;>sp Q96JB2-2 COG3_HUMAN          | 4.39E-12  |        |
| Q96JB3                  | HIC2_HUMAN Hypermethylated in cancer 2 protein OS=Homo sapiens GN=HIC2 PE=1 SV=2                                           |           |        |
| Q96JB3-2                | HIC2_HUMAN Isoform 2 of Hypermethylated in cancer 2 protein OS=Homo sapiens GN=HIC2                                        |           |        |
| Q96JB5                  | CK5P3_HUMAN CDK5 regulatory subunit-associated protein 3 OS=Homo sapiens GN=CDK5RAP3 PE=1 SV=2                             |           |        |
| Q96JB5-2                | CK5P3_HUMAN Isoform 2 of CDK5 regulatory subunit-associated protein 3 OS=Homo sapiens GN=CDK5RAP3                          |           |        |
| Q96JB5-3                | CK5P3_HUMAN Isoform 3 of CDK5 regulatory subunit-associated protein 3 OS=Homo sapiens GN=CDK5RAP3                          |           |        |
| Q96JB5;Q96JB5-2         | CK5P3_HUMAN CDK5 regulatory subunit-associated protein 3 OS=Homo sapiens GN=CDK5RAP3 PE=1 SV=2;>sp Q96JB5-2 CK5P3_H        | 6.15E-14  |        |
| Q96JG6;Q96JG6-2         | CC132_HUMAN Coiled-coil domain-containing protein 132 OS=Homo sapiens GN=CCDC132 PE=1 SV=3;>sp Q96JG6-2 CC132_HUMA         | 6.32E-10  |        |
| Q96JH7                  | VCIP1_HUMAN Deubiquitinating protein VCIP135 OS=Homo sapiens GN=VCIP1 PE=1 SV=2                                            | 9.68E-68  |        |
| Q96JJ3                  | ELMO2_HUMAN Engulfment and cell motility protein 2 OS=Homo sapiens GN=ELMO2 PE=1 SV=2                                      |           | 17.85  |
| Q96JJ7                  | TMX3_HUMAN Protein disulfide-isomerase TMX3 OS=Homo sapiens GN=TMX3 PE=1 SV=2                                              |           | 146.51 |
| Q96JJ7-2                | TMX3_HUMAN Isoform 2 of Protein disulfide-isomerase TMX3 OS=Homo sapiens GN=TMX3                                           |           | 97.84  |
| Q96JJ7;Q3B7X1;Q96JJ7-2  | TMX3_HUMAN Protein disulfide-isomerase TMX3 OS=Homo sapiens GN=TMX3 PE=1 SV=2;>tr Q3B7X1 Q3B7X1_HUMAN TMX3 proteir         | 5.37E-24  |        |
| Q96JM3                  | ZN828_HUMAN Zinc finger protein 828 OS=Homo sapiens GN=ZNF828 PE=1 SV=2                                                    |           |        |
| Q96JN2                  | CC136_HUMAN Coiled-coil domain-containing protein 136 OS=Homo sapiens GN=CCDC136 PE=1 SV=3                                 |           |        |
| Q96JN2-2                | CC136_HUMAN Isoform 2 of Coiled-coil domain-containing protein 136 OS=Homo sapiens GN=CCDC136                              |           |        |
| Q96JN2-3                | CC136_HUMAN Isoform 3 of Coiled-coil domain-containing protein 136 OS=Homo sapiens GN=CCDC136                              |           |        |
| Q96JN2-4                | CC136_HUMAN Isoform 4 of Coiled-coil domain-containing protein 136 OS=Homo sapiens GN=CCDC136                              |           |        |
| Q96JP0                  | FEM1C_HUMAN Protein fem-1 homolog C OS=Homo sapiens GN=FEM1C PE=2 SV=1                                                     |           |        |
| Q96JP2                  | MY15B_HUMAN Putative myosin-XVB OS=Homo sapiens GN=MYO15B PE=5 SV=2                                                        |           | 51.63  |
| Q96JP5                  | ZFP91_HUMAN E3 ubiquitin-protein ligase ZFP91 OS=Homo sapiens GN=ZFP91 PE=1 SV=1                                           |           | 54.66  |
| Q96JP5-2                | ZFP91_HUMAN Isoform 2 of E3 ubiquitin-protein ligase ZFP91 OS=Homo sapiens GN=ZFP91                                        |           | 54.66  |
| Q96JP5;Q96JP5-2         | ZFP91_HUMAN E3 ubiquitin-protein ligase ZFP91 OS=Homo sapiens GN=ZFP91 PE=1 SV=1;>sp Q96JP5-2 ZFP91_HUMAN Isoform 2 c      | 5.47E-10  |        |
| Q96JY6-3;D3DSR5;Q96JY13 | 3 PDLI2_HUMAN Isoform 3 of PDZ and LIM domain protein 2 OS=Homo sapiens GN=PDLIM2;>tr D3DSR5 D3DSR5_HUMAN PDZ and I        | 5.86E-16  |        |
| Q96K17                  | BT3L4_HUMAN Transcription factor BTF3 homolog 4 OS=Homo sapiens GN=BTF3L4 PE=1 SV=1                                        |           | 191.83 |
| Q96K37                  | S35E1_HUMAN Solute carrier family 35 member E1 OS=Homo sapiens GN=SLC35E1 PE=1 SV=2                                        |           | 46.27  |
| Q96K37-2                | S35E1_HUMAN Isoform 2 of Solute carrier family 35 member E1 OS=Homo sapiens GN=SLC35E1                                     |           | 0.24   |
| Q96K76                  | UBP47_HUMAN Ubiquitin carboxyl-terminal hydrolase 47 OS=Homo sapiens GN=USP47 PE=1 SV=3                                    |           | 28.09  |
| Q96K76-2                | UBP47_HUMAN Isoform 2 of Ubiquitin carboxyl-terminal hydrolase 47 OS=Homo sapiens GN=USP47                                 |           | 28.09  |
| Q96K76;B3KXF5;Q96K76-   | UBP47_HUMAN Ubiquitin carboxyl-terminal hydrolase 47 OS=Homo sapiens GN=USP47 PE=1 SV=3;>tr B3KXF5 B3KXF5_HUMAN Ubic       | 2.46E-13  |        |
| Q96K83                  | ZN521_HUMAN Zinc finger protein 521 OS=Homo sapiens GN=ZNF521 PE=1 SV=1                                                    |           | 2      |
| Q96KA5                  | CLP1L_HUMAN Cleft lip and palate transmembrane protein 1-like protein OS=Homo sapiens GN=CLPTM1L PE=1 SV=1                 |           |        |
| Q96KA5-2                | CLP1L_HUMAN Isoform 2 of Cleft lip and palate transmembrane protein 1-like protein OS=Homo sapiens GN=CLPTM1L              |           |        |
| Q96KB5                  | TOPK_HUMAN Lymphokine-activated killer T-cell-originated protein kinase OS=Homo sapiens GN=PBK PE=1 SV=3                   |           |        |
| Q96KC8                  | DNJC1_HUMAN DnaJ homolog subfamily C member 1 OS=Homo sapiens GN=DNAJC1 PE=1 SV=1                                          |           | 105.63 |
| Q96KG9;Q96KG9-2;Q96K1   | NTKL_HUMAN N-terminal kinase-like protein OS=Homo sapiens GN=SCYL1 PE=1 SV=1;>sp Q96KG9-2 NTKL_HUMAN Isoform 2 of N-       | 6.95E-95  |        |
| Q96KK5                  | H2A1H_HUMAN Histone H2A type 1-H OS=Homo sapiens GN=HIST1H2AH PE=1 SV=3                                                    |           | 288.83 |
| Q96KN1                  | FA84B_HUMAN Protein FAM84B OS=Homo sapiens GN=FAM84B PE=1 SV=1                                                             | 5.31E-06  |        |
| Q96KP1                  | EXOC2_HUMAN Exocyst complex component 2 OS=Homo sapiens GN=EXOC2 PE=1 SV=1                                                 | 5.61E-19  |        |
| Q96KP4;B4DV28;Q96KP4-   | CNDP2_HUMAN Cytosolic non-specific dipeptidase OS=Homo sapiens GN=CNDP2 PE=1 SV=2;>tr B4DV28 B4DV28_HUMAN cDNA FLJ!        | 9.23E-284 |        |
| Q96KQ7                  | EHMT2_HUMAN Histone-lysine N-methyltransferase EHMT2 OS=Homo sapiens GN=EHMT2 PE=1 SV=3                                    |           |        |
| Q96KQ7-2                | EHMT2_HUMAN Isoform 2 of Histone-lysine N-methyltransferase EHMT2 OS=Homo sapiens GN=EHMT2                                 |           |        |
| Q96KQ7-3                | EHMT2_HUMAN Isoform 3 of Histone-lysine N-methyltransferase EHMT2 OS=Homo sapiens GN=EHMT2                                 |           |        |
| Q96KQ7;Q96KQ7-2         | EHMT2_HUMAN Histone-lysine N-methyltransferase EHMT2 OS=Homo sapiens GN=EHMT2 PE=1 SV=3;>sp Q96KQ7-2 EHMT2_HUMAN           | 2.73E-57  |        |
| Q96KR1                  | ZFR_HUMAN Zinc finger RNA-binding protein OS=Homo sapiens GN=ZFR PE=1 SV=2                                                 |           | 188.48 |
| Q96L16                  | ALM1L_HUMAN Putative ALMS1-like protein OS=Homo sapiens GN=ALMS1P PE=5 SV=1                                                |           |        |
| Q96L21                  | RL10L_HUMAN 60S ribosomal protein L10-like OS=Homo sapiens GN=RPL10L PE=1 SV=3                                             |           | 307.3  |
| Q96L46                  | CPNS2_HUMAN Calpain small subunit 2 OS=Homo sapiens GN=CAPNS2 PE=2 SV=2                                                    |           | 75.18  |
| Q96L73                  | NSD1_HUMAN Histone-lysine N-methyltransferase, H3 lysine-36 and H4 lysine-20 specific OS=Homo sapiens GN=NSD1 PE=1 SV=1    |           |        |
| Q96L73-2                | NSD1_HUMAN Isoform 2 of Histone-lysine N-methyltransferase, H3 lysine-36 and H4 lysine-20 specific OS=Homo sapiens GN=NSD1 |           |        |
| Q96L73-3                | NSD1_HUMAN Isoform 3 of Histone-lysine N-methyltransferase, H3 lysine-36 and H4 lysine-20 specific OS=Homo sapiens GN=NSD1 |           |        |
| Q96L91                  | EP400_HUMAN E1A-binding protein p400 OS=Homo sapiens GN=EP400 PE=1 SV=4                                                    |           |        |
| Q96L91-2                | EP400_HUMAN Isoform 2 of E1A-binding protein p400 OS=Homo sapiens GN=EP400                                                 |           |        |
| Q96L91-3                | EP400_HUMAN Isoform 3 of E1A-binding protein p400 OS=Homo sapiens GN=EP400                                                 |           |        |
| Q96L91-4                | EP400_HUMAN Isoform 4 of E1A-binding protein p400 OS=Homo sapiens GN=EP400                                                 |           |        |
| Q96L91-5                | EP400_HUMAN Isoform 5 of E1A-binding protein p400 OS=Homo sapiens GN=EP400                                                 |           |        |
| Q96L91;Q96L91-2;Q96L9   | EP400_HUMAN E1A-binding protein p400 OS=Homo sapiens GN=EP400 PE=1 SV=4;>sp Q96L91-2 EP400_HUMAN Isoform 2 of E1A-t        | 5.71E-07  |        |
| Q96L92;Q96L92-3;Q96L9   | SNX27_HUMAN Sorting nexin-27 OS=Homo sapiens GN=SNX27 PE=1 SV=2;>sp Q96L92-3 SNX27_HUMAN Isoform 2 of Sorting nexir        | 4.55E-17  |        |
| Q96L93                  | KI16B_HUMAN Kinesin-like protein KIF16B OS=Homo sapiens GN=KIF16B PE=1 SV=2                                                |           |        |
| Q96L93-2                | KI16B_HUMAN Isoform 2 of Kinesin-like protein KIF16B OS=Homo sapiens GN=KIF16B                                             |           |        |
| Q96L93-2;Q96L93;Q96L9   | 2 KI16B_HUMAN Isoform 2 of Kinesin-like protein KIF16B OS=Homo sapiens GN=KIF16B;>sp Q96L93 KI16B_HUMAN Kinesin-like pro   | 2.18E-05  |        |



|                            |                                                                                                                    |           |        |
|----------------------------|--------------------------------------------------------------------------------------------------------------------|-----------|--------|
| Q96L93-4                   | KI16B_HUMAN Isoform 3 of Kinesin-like protein KIF16B OS=Homo sapiens GN=KIF16B                                     |           |        |
| Q96L93-5                   | KI16B_HUMAN Isoform 4 of Kinesin-like protein KIF16B OS=Homo sapiens GN=KIF16B                                     |           |        |
| Q96L93-6                   | KI16B_HUMAN Isoform 5 of Kinesin-like protein KIF16B OS=Homo sapiens GN=KIF16B                                     |           |        |
| Q96LA8;Q96LA8-2            | ANM6_HUMAN Protein arginine N-methyltransferase 6 OS=Homo sapiens GN=PRMT6 PE=1 SV=1;>sp Q96LA8-2 ANM6_HUMAN Isofo | 1.28E-126 |        |
| Q96LB3                     | IFT74_HUMAN Intraflagellar transport protein 74 homolog OS=Homo sapiens GN=IFT74 PE=2 SV=1                         |           | 88.69  |
| Q96LB3-2                   | IFT74_HUMAN Isoform 2 of Intraflagellar transport protein 74 homolog OS=Homo sapiens GN=IFT74                      |           | 67.87  |
| Q96LD4                     | TRI47_HUMAN Tripartite motif-containing protein 47 OS=Homo sapiens GN=TRIM47 PE=1 SV=2                             |           |        |
| Q96LI9                     | CX058_HUMAN Putative uncharacterized protein CXorf58 OS=Homo sapiens GN=CXorf58 PE=2 SV=2                          |           |        |
| Q96LJ7                     | DHRS1_HUMAN Dehydrogenase/reductase SDR family member 1 OS=Homo sapiens GN=DHRS1 PE=1 SV=1                         | 1.62E-10  |        |
| Q96LP2                     | FA81B_HUMAN Protein FAM81B OS=Homo sapiens GN=FAM81B PE=2 SV=3                                                     |           |        |
| Q96LR5                     | UB2E2_HUMAN Ubiquitin-conjugating enzyme E2 E2 OS=Homo sapiens GN=UBE2E2 PE=1 SV=1                                 | 1.20E-10  |        |
| Q96LV5                     | IN4L1_HUMAN Integrator complex subunit 4-like protein 1 OS=Homo sapiens GN=INTS4L1 PE=2 SV=1                       |           |        |
| Q96LX7                     | CCD17_HUMAN Coiled-coil domain-containing protein 17 OS=Homo sapiens GN=CCDC17 PE=2 SV=2                           |           |        |
| Q96LX7-2                   | CCD17_HUMAN Isoform 3 of Coiled-coil domain-containing protein 17 OS=Homo sapiens GN=CCDC17                        |           |        |
| Q96LX7-5                   | CCD17_HUMAN Isoform 2 of Coiled-coil domain-containing protein 17 OS=Homo sapiens GN=CCDC17                        |           |        |
| Q96M02                     | CJ090_HUMAN Uncharacterized protein C10orf90 OS=Homo sapiens GN=C10orf90 PE=2 SV=2                                 |           |        |
| Q96M02-2                   | CJ090_HUMAN Isoform 2 of Uncharacterized protein C10orf90 OS=Homo sapiens GN=C10orf90                              |           |        |
| Q96M27-2;Q96M27-3;Q96M27-4 | PRRC1_HUMAN Isoform 2 of Protein PRRC1 OS=Homo sapiens GN=PRRC1;>sp Q96M27-3 PRRC1_HUMAN Isoform 3 of Protein PRR  | 3.53E-64  |        |
| Q96M42                     | CU129_HUMAN Uncharacterized protein C21orf129 OS=Homo sapiens GN=C21orf129 PE=2 SV=2                               |           | 31.34  |
| Q96M86                     | DNHD1_HUMAN Dynein heavy chain domain-containing protein 1 OS=Homo sapiens GN=DNHD1 PE=1 SV=2                      |           |        |
| Q96M86-4                   | DNHD1_HUMAN Isoform 2 of Dynein heavy chain domain-containing protein 1 OS=Homo sapiens GN=DNHD1                   |           |        |
| Q96M86-5                   | DNHD1_HUMAN Isoform 3 of Dynein heavy chain domain-containing protein 1 OS=Homo sapiens GN=DNHD1                   |           |        |
| Q96M96                     | FGD4_HUMAN FYVE, RhoGEF and PH domain-containing protein 4 OS=Homo sapiens GN=FGD4 PE=1 SV=2                       |           |        |
| Q96MC2                     | CC164_HUMAN Coiled-coil domain-containing protein 164 OS=Homo sapiens GN=CCDC164 PE=2 SV=2                         |           |        |
| Q96MD7                     | CI085_HUMAN Uncharacterized protein C9orf85 OS=Homo sapiens GN=C9orf85 PE=1 SV=1                                   |           |        |
| Q96MG7                     | MAGG1_HUMAN Melanoma-associated antigen G1 OS=Homo sapiens GN=NDNL2 PE=1 SV=1                                      |           |        |
| Q96MI9                     | CBPC4_HUMAN Cytosolic carboxypeptidase 4 OS=Homo sapiens GN=AGBL1 PE=2 SV=2                                        |           | 37.97  |
| Q96MI9-2                   | CBPC4_HUMAN Isoform 2 of Cytosolic carboxypeptidase 4 OS=Homo sapiens GN=AGBL1                                     |           | 30.58  |
| Q96MI9-3                   | CBPC4_HUMAN Isoform 3 of Cytosolic carboxypeptidase 4 OS=Homo sapiens GN=AGBL1                                     |           | 30.58  |
| Q96MK2                     | FA65C_HUMAN Protein FAM65C OS=Homo sapiens GN=FAM65C PE=2 SV=4                                                     |           | 23.58  |
| Q96MK2-2                   | FA65C_HUMAN Isoform 2 of Protein FAM65C OS=Homo sapiens GN=FAM65C                                                  |           | 23.58  |
| Q96MM3                     | ZFP42_HUMAN Zinc finger protein 42 homolog OS=Homo sapiens GN=ZFP42 PE=1 SV=2                                      |           |        |
| Q96MR6                     | WDR65_HUMAN WD repeat-containing protein 65 OS=Homo sapiens GN=WDR65 PE=2 SV=3                                     | 7.47E-11  |        |
| Q96MT1                     | RN145_HUMAN RING finger protein 145 OS=Homo sapiens GN=RNF145 PE=2 SV=2                                            |           |        |
| Q96MT1-2                   | RN145_HUMAN Isoform 2 of RING finger protein 145 OS=Homo sapiens GN=RNF145                                         |           |        |
| Q96MT3                     | PRIC1_HUMAN Prickle-like protein 1 OS=Homo sapiens GN=PRICKLE1 PE=1 SV=2                                           |           |        |
| Q96MT7                     | WDR52_HUMAN WD repeat-containing protein 52 OS=Homo sapiens GN=WDR52 PE=1 SV=1                                     |           |        |
| Q96MT7-2                   | WDR52_HUMAN Isoform 2 of WD repeat-containing protein 52 OS=Homo sapiens GN=WDR52                                  |           |        |
| Q96MT7-2;Q96MT7            | WDR52_HUMAN Isoform 2 of WD repeat-containing protein 52 OS=Homo sapiens GN=WDR52;>sp Q96MT7 WDR52_HUMAN WD re     | 7.41E-09  |        |
| Q96MT8                     | CEP63_HUMAN Centrosomal protein of 63 kDa OS=Homo sapiens GN=CEP63 PE=1 SV=1                                       |           |        |
| Q96MT8-2                   | CEP63_HUMAN Isoform 2 of Centrosomal protein of 63 kDa OS=Homo sapiens GN=CEP63                                    |           |        |
| Q96MT8-3                   | CEP63_HUMAN Isoform 3 of Centrosomal protein of 63 kDa OS=Homo sapiens GN=CEP63                                    |           |        |
| Q96MT8-4                   | CEP63_HUMAN Isoform 4 of Centrosomal protein of 63 kDa OS=Homo sapiens GN=CEP63                                    |           |        |
| Q96MU7                     | YTDC1_HUMAN YTH domain-containing protein 1 OS=Homo sapiens GN=YTHDC1 PE=1 SV=3                                    |           | 46.21  |
| Q96MU7-2                   | YTDC1_HUMAN Isoform 2 of YTH domain-containing protein 1 OS=Homo sapiens GN=YTHDC1                                 |           | 46.21  |
| Q96MW1;Q96MW1-2            | CCD43_HUMAN Coiled-coil domain-containing protein 43 OS=Homo sapiens GN=CCDC43 PE=1 SV=2;>sp Q96MW1-2 CCD43_HUMAN  | 3.32E-18  |        |
| Q96MW5                     | COG8_HUMAN Conserved oligomeric Golgi complex subunit 8 OS=Homo sapiens GN=COG8 PE=1 SV=2                          | 8.69E-08  |        |
| Q96MW7                     | TIGD1_HUMAN Tigger transposable element-derived protein 1 OS=Homo sapiens GN=TIGD1 PE=2 SV=1                       |           | 28.29  |
| Q96MX6                     | WDR92_HUMAN WD repeat-containing protein 92 OS=Homo sapiens GN=WDR92 PE=1 SV=1                                     | 2.39E-13  |        |
| Q96N64                     | PWP2A_HUMAN PWWP domain-containing protein 2A OS=Homo sapiens GN=PWWP2A PE=1 SV=2                                  |           |        |
| Q96N64-2                   | PWP2A_HUMAN Isoform 2 of PWWP domain-containing protein 2A OS=Homo sapiens GN=PWWP2A                               |           |        |
| Q96N66                     | MBOA7_HUMAN Lysophospholipid acyltransferase 7 OS=Homo sapiens GN=MBOAT7 PE=1 SV=2                                 |           | 324.7  |
| Q96N66-2                   | MBOA7_HUMAN Isoform 2 of Lysophospholipid acyltransferase 7 OS=Homo sapiens GN=MBOAT7                              |           | 290.54 |
| Q96N66-3                   | MBOA7_HUMAN Isoform 3 of Lysophospholipid acyltransferase 7 OS=Homo sapiens GN=MBOAT7                              |           | 253.01 |
| Q96N66;B4DDH8;Q96N66       | MBOA7_HUMAN Lysophospholipid acyltransferase 7 OS=Homo sapiens GN=MBOAT7 PE=1 SV=2;>tr B4DDH8 B4DDH8_HUMAN cDNA    | 3.37E-06  |        |
| Q96N67                     | DOCK7_HUMAN Dedicator of cytokinesis protein 7 OS=Homo sapiens GN=DOCK7 PE=1 SV=4                                  |           | 31.12  |
| Q96N67-2                   | DOCK7_HUMAN Isoform 2 of Dedicator of cytokinesis protein 7 OS=Homo sapiens GN=DOCK7                               |           | 31.12  |
| Q96N67-3                   | DOCK7_HUMAN Isoform 3 of Dedicator of cytokinesis protein 7 OS=Homo sapiens GN=DOCK7                               |           | 29.6   |
| Q96N67-4                   | DOCK7_HUMAN Isoform 4 of Dedicator of cytokinesis protein 7 OS=Homo sapiens GN=DOCK7                               |           | 29.6   |
| Q96N67-5                   | DOCK7_HUMAN Isoform 5 of Dedicator of cytokinesis protein 7 OS=Homo sapiens GN=DOCK7                               |           | 29.6   |
| Q96N67-6                   | DOCK7_HUMAN Isoform 6 of Dedicator of cytokinesis protein 7 OS=Homo sapiens GN=DOCK7                               |           | 31.12  |

|                          |                                                                                                                                        |           |         |
|--------------------------|----------------------------------------------------------------------------------------------------------------------------------------|-----------|---------|
| Q96N67;Q96N67-6;Q96N67-6 | DOCK7_HUMAN Dedicator of cytokinesis protein 7 OS=Homo sapiens GN=DOCK7 PE=1 SV=4;>sp Q96N67-6 DOCK7_HUMAN Isoform 1                   | 1.13E-22  |         |
| Q96N76                   | HUTU_HUMAN Urocanate hydratase OS=Homo sapiens GN=UROC1 PE=1 SV=1                                                                      |           |         |
| Q96NB2                   | SFXN2_HUMAN Sideroflexin-2 OS=Homo sapiens GN=SFXN2 PE=1 SV=2                                                                          | 2.36E-12  |         |
| Q96ND0                   | CR019_HUMAN Uncharacterized protein C18orf19 OS=Homo sapiens GN=C18orf19 PE=2 SV=2                                                     |           | 69.12   |
| Q96NE9                   | FRMD6_HUMAN FERM domain-containing protein 6 OS=Homo sapiens GN=FRMD6 PE=1 SV=1                                                        |           | 56.12   |
| Q96NE9-2                 | FRMD6_HUMAN Isoform 2 of FERM domain-containing protein 6 OS=Homo sapiens GN=FRMD6                                                     |           | 56.12   |
| Q96NE9-3                 | FRMD6_HUMAN Isoform 3 of FERM domain-containing protein 6 OS=Homo sapiens GN=FRMD6                                                     |           | 56.12   |
| Q96NJ3                   | ZN285_HUMAN Zinc finger protein 285 OS=Homo sapiens GN=ZNF285 PE=2 SV=2                                                                |           |         |
| Q96NJ3-2                 | ZN285_HUMAN Isoform 2 of Zinc finger protein 285 OS=Homo sapiens GN=ZNF285                                                             |           |         |
| Q96NM4                   | TOX2_HUMAN TOX high mobility group box family member 2 OS=Homo sapiens GN=TOX2 PE=2 SV=2                                               |           | 26.7    |
| Q96NM4-2                 | TOX2_HUMAN Isoform 2 of TOX high mobility group box family member 2 OS=Homo sapiens GN=TOX2                                            |           | 26.7    |
| Q96NW7-2                 | LRRC7_HUMAN Isoform 2 of Leucine-rich repeat-containing protein 7 OS=Homo sapiens GN=LRRC7                                             |           | 0.5     |
| Q96NW7;Q96NW7-2          | LRRC7_HUMAN Leucine-rich repeat-containing protein 7 OS=Homo sapiens GN=LRRC7 PE=1 SV=1;>sp Q96NW7-2 LRRC7_HUMAN Isoform 1             | 1.60E-08  |         |
| Q96NY7                   | CLIC6_HUMAN Chloride intracellular channel protein 6 OS=Homo sapiens GN=CLIC6 PE=2 SV=3                                                |           | 67.31   |
| Q96NY7-2                 | CLIC6_HUMAN Isoform A of Chloride intracellular channel protein 6 OS=Homo sapiens GN=CLIC6                                             |           | 67.31   |
| Q96NY7;Q96NY7-2          | CLIC6_HUMAN Chloride intracellular channel protein 6 OS=Homo sapiens GN=CLIC6 PE=2 SV=3;>sp Q96NY7-2 CLIC6_HUMAN Isoform B             | 8.67E-163 |         |
| Q96N28                   | WFKN1_HUMAN WAP, kazal, immunoglobulin, kunitz and NTR domain-containing protein 1 OS=Homo sapiens GN=WFIKKN1 PE=1 SV=1                |           |         |
| Q96P11                   | NSUN5_HUMAN Putative methyltransferase NSUN5 OS=Homo sapiens GN=NSUN5 PE=1 SV=2                                                        |           | 89.2    |
| Q96P11-2                 | NSUN5_HUMAN Isoform 2 of Putative methyltransferase NSUN5 OS=Homo sapiens GN=NSUN5                                                     |           | 99.69   |
| Q96P11-2;Q96P11          | 2 NSUN5_HUMAN Isoform 2 of Putative methyltransferase NSUN5 OS=Homo sapiens GN=NSUN5;>sp Q96P11 NSUN5_HUMAN Putative methyltransferase | 2.64E-12  |         |
| Q96P11-3                 | NSUN5_HUMAN Isoform 3 of Putative methyltransferase NSUN5 OS=Homo sapiens GN=NSUN5                                                     |           | 1.09    |
| Q96P16                   | RPR1A_HUMAN Regulation of nuclear pre domain-containing protein 1A OS=Homo sapiens GN=RPRD1A PE=1 SV=1                                 |           | 44.69   |
| Q96P16-2                 | RPR1A_HUMAN Isoform 2 of Regulation of nuclear pre domain-containing protein 1A OS=Homo sapiens GN=RPRD1A                              |           | 44.69   |
| Q96P16-3                 | RPR1A_HUMAN Isoform 3 of Regulation of nuclear pre domain-containing protein 1A OS=Homo sapiens GN=RPRD1A                              |           | 14.76   |
| Q96P16;Q96P16-2;Q96P16-3 | RPR1A_HUMAN Regulation of nuclear pre-mRNA domain-containing protein 1A OS=Homo sapiens GN=RPRD1A PE=1 SV=1;>sp Q96P16-2               | 2.34E-27  |         |
| Q96P20                   | NALP3_HUMAN NACHT, LRR and PYD domains-containing protein 3 OS=Homo sapiens GN=NLRP3 PE=1 SV=3                                         |           | 27.14   |
| Q96P20-2                 | NALP3_HUMAN Isoform 1 of NACHT, LRR and PYD domains-containing protein 3 OS=Homo sapiens GN=NLRP3                                      |           | 22.99   |
| Q96P20-3                 | NALP3_HUMAN Isoform 3 of NACHT, LRR and PYD domains-containing protein 3 OS=Homo sapiens GN=NLRP3                                      |           | 22.99   |
| Q96P20-4                 | NALP3_HUMAN Isoform 4 of NACHT, LRR and PYD domains-containing protein 3 OS=Homo sapiens GN=NLRP3                                      |           | 27.14   |
| Q96P20-5                 | NALP3_HUMAN Isoform 5 of NACHT, LRR and PYD domains-containing protein 3 OS=Homo sapiens GN=NLRP3                                      |           | 22.99   |
| Q96P47                   | AGAP3_HUMAN Arf-GAP with GTPase, ANK repeat and PH domain-containing protein 3 OS=Homo sapiens GN=AGAP3 PE=1 SV=2                      |           | 25.51   |
| Q96P47-2                 | AGAP3_HUMAN Isoform 2 of Arf-GAP with GTPase, ANK repeat and PH domain-containing protein 3 OS=Homo sapiens GN=AGAP3                   |           | 25.51   |
| Q96P47-3                 | AGAP3_HUMAN Isoform 3 of Arf-GAP with GTPase, ANK repeat and PH domain-containing protein 3 OS=Homo sapiens GN=AGAP3                   |           | 1.92    |
| Q96P47-4                 | AGAP3_HUMAN Isoform 4 of Arf-GAP with GTPase, ANK repeat and PH domain-containing protein 3 OS=Homo sapiens GN=AGAP3                   |           | 25.51   |
| Q96P48                   | ARAP1_HUMAN Arf-GAP with Rho-GAP domain, ANK repeat and PH domain-containing protein 1 OS=Homo sapiens GN=ARAP1 PE=1 SV=3              |           | 26.68   |
| Q96P48-1                 | ARAP1_HUMAN Isoform 1 of Arf-GAP with Rho-GAP domain, ANK repeat and PH domain-containing protein 1 OS=Homo sapiens GN=ARAP1           |           | 4.95    |
| Q96P48-2                 | ARAP1_HUMAN Isoform 2 of Arf-GAP with Rho-GAP domain, ANK repeat and PH domain-containing protein 1 OS=Homo sapiens GN=ARAP1           |           | 4.95    |
| Q96P48-3                 | ARAP1_HUMAN Isoform 3 of Arf-GAP with Rho-GAP domain, ANK repeat and PH domain-containing protein 1 OS=Homo sapiens GN=ARAP1           |           | 26.68   |
| Q96P48-4                 | ARAP1_HUMAN Isoform 4 of Arf-GAP with Rho-GAP domain, ANK repeat and PH domain-containing protein 1 OS=Homo sapiens GN=ARAP1           |           | 4.95    |
| Q96P48-5                 | ARAP1_HUMAN Isoform 5 of Arf-GAP with Rho-GAP domain, ANK repeat and PH domain-containing protein 1 OS=Homo sapiens GN=ARAP1           |           |         |
| Q96P48;Q96P48-3;Q96P48-5 | ARAP1_HUMAN Arf-GAP with Rho-GAP domain, ANK repeat and PH domain-containing protein 1 OS=Homo sapiens GN=ARAP1 PE=1 SV=1              | 4.06E-17  |         |
| Q96P67                   | GPR82_HUMAN Probable G-protein coupled receptor 82 OS=Homo sapiens GN=GPR82 PE=2 SV=1                                                  |           |         |
| Q96P70                   | IPO9_HUMAN Importin-9 OS=Homo sapiens GN=IPO9 PE=1 SV=3                                                                                |           |         |
| Q96PC3                   | AP1S3_HUMAN AP-1 complex subunit sigma-3 OS=Homo sapiens GN=AP1S3 PE=2 SV=1                                                            |           |         |
| Q96PC3-2                 | AP1S3_HUMAN Isoform 2 of AP-1 complex subunit sigma-3 OS=Homo sapiens GN=AP1S3                                                         |           |         |
| Q96PC3-3                 | AP1S3_HUMAN Isoform 3 of AP-1 complex subunit sigma-3 OS=Homo sapiens GN=AP1S3                                                         |           |         |
| Q96PC3-4                 | AP1S3_HUMAN Isoform 4 of AP-1 complex subunit sigma-3 OS=Homo sapiens GN=AP1S3                                                         |           |         |
| Q96PD2-2;Q96PD2          | 2 DCBD2_HUMAN Isoform 2 of Discoidin, CUB and LCCL domain-containing protein 2 OS=Homo sapiens GN=DCBLD2;>sp Q96PD2 DCBD2              | 2.05E-10  |         |
| Q96PD5-2;A8K050;Q96PD5-2 | 2 PGRP2_HUMAN Isoform 2 of N-acetylmuramoyl-L-alanine amidase OS=Homo sapiens GN=PGLYRP2;>tr A8K050 A8K050_HUMAN ccd                   | 6.58E-193 |         |
| Q96PE2                   | ARHGH_HUMAN Rho guanine nucleotide exchange factor 17 OS=Homo sapiens GN=ARHGEF17 PE=1 SV=1                                            |           |         |
| Q96PH1                   | NOX5_HUMAN NADPH oxidase 5 OS=Homo sapiens GN=NOX5 PE=1 SV=1                                                                           |           |         |
| Q96PH1-2                 | NOX5_HUMAN Isoform v4 of NADPH oxidase 5 OS=Homo sapiens GN=NOX5                                                                       |           |         |
| Q96PH1-3                 | NOX5_HUMAN Isoform v1 of NADPH oxidase 5 OS=Homo sapiens GN=NOX5                                                                       |           |         |
| Q96PH1-4                 | NOX5_HUMAN Isoform v2 of NADPH oxidase 5 OS=Homo sapiens GN=NOX5                                                                       |           |         |
| Q96PH1-5                 | NOX5_HUMAN Isoform v5 of NADPH oxidase 5 OS=Homo sapiens GN=NOX5                                                                       |           |         |
| Q96PH1-6                 | NOX5_HUMAN Isoform v6 of NADPH oxidase 5 OS=Homo sapiens GN=NOX5                                                                       |           |         |
| Q96PK2                   | MACF4_HUMAN Microtubule-actin cross-linking factor 1, isoform 4 OS=Homo sapiens GN=MACF1 PE=1 SV=2                                     |           | 1579.58 |
| Q96PK6                   | RBM14_HUMAN RNA-binding protein 14 OS=Homo sapiens GN=RBM14 PE=1 SV=2                                                                  |           | 78.39   |
| Q96PK6-2                 | RBM14_HUMAN Isoform 2 of RNA-binding protein 14 OS=Homo sapiens GN=RBM14                                                               |           |         |
| Q96PK6;Q96PK6-2          | RBM14_HUMAN RNA-binding protein 14 OS=Homo sapiens GN=RBM14 PE=1 SV=2;>sp Q96PK6-2 RBM14_HUMAN Isoform 2 of RNA-binding                | 3.12E-87  |         |
| Q96PN6                   | ADCYA_HUMAN Adenylate cyclase type 10 OS=Homo sapiens GN=ADCY10 PE=1 SV=3                                                              |           | 57.27   |

|                            |                                                                                                                                                                                    |            |        |
|----------------------------|------------------------------------------------------------------------------------------------------------------------------------------------------------------------------------|------------|--------|
| Q96PN6-2                   | ADCYA_HUMAN Isoform 2 of Adenylate cyclase type 10 OS=Homo sapiens GN=ADCY10                                                                                                       |            | 57.27  |
| Q96PN6-3                   | ADCYA_HUMAN Isoform 3 of Adenylate cyclase type 10 OS=Homo sapiens GN=ADCY10                                                                                                       |            | 0.36   |
| Q96PN8                     | TSSK3_HUMAN Testis-specific serine/threonine-protein kinase 3 OS=Homo sapiens GN=TSSK3 PE=2 SV=1                                                                                   |            |        |
| Q96PP8;Q8NF03;Q86TM5;      | GBP5_HUMAN Guanylate-binding protein 5 OS=Homo sapiens GN=GBP5 PE=2 SV=1;>tr Q8NF03 Q8NF03_HUMAN FLJ00401 protein (                                                                | 1.05E-38   |        |
| Q96PP9                     | GBP4_HUMAN Guanylate-binding protein 4 OS=Homo sapiens GN=GBP4 PE=1 SV=2                                                                                                           |            | 34.08  |
| Q96PQ0                     | SORC2_HUMAN VPS10 domain-containing receptor SorCS2 OS=Homo sapiens GN=SORCS2 PE=1 SV=3                                                                                            |            | 66.37  |
| Q96PU4                     | UHRF2_HUMAN E3 ubiquitin-protein ligase UHRF2 OS=Homo sapiens GN=UHRF2 PE=1 SV=1                                                                                                   | 7.25E-14   |        |
| Q96PU5-8;Q96PU5;Q96PU8     | NEDD4L_HUMAN Isoform 8 of E3 ubiquitin-protein ligase NEDD4-like OS=Homo sapiens GN=NEDD4L;>sp Q96PU5 NED4L_HUMAN E3 ubiquitin-protein ligase NEDD4-like OS=Homo sapiens GN=NEDD4L | 1.82E-25   |        |
| Q96PU8                     | QKI_HUMAN Protein quaking OS=Homo sapiens GN=QKI PE=1 SV=1                                                                                                                         |            | 144.43 |
| Q96PU8-3                   | QKI_HUMAN Isoform 2 of Protein quaking OS=Homo sapiens GN=QKI                                                                                                                      |            | 144.43 |
| Q96PU8-4;Q96PU8-7;Q96PU8-5 | QKI_HUMAN Isoform 4 of Protein quaking OS=Homo sapiens GN=QKI;>sp Q96PU8-7 QKI_HUMAN Isoform 7 of Protein quaking OS=                                                              | 2.26E-11   |        |
| Q96PU8-5                   | QKI_HUMAN Isoform 3 of Protein quaking OS=Homo sapiens GN=QKI                                                                                                                      |            | 144.43 |
| Q96PU8-6                   | QKI_HUMAN Isoform 4 of Protein quaking OS=Homo sapiens GN=QKI                                                                                                                      |            | 144.43 |
| Q96PU8-8                   | QKI_HUMAN Isoform 5 of Protein quaking OS=Homo sapiens GN=QKI                                                                                                                      |            | 144.43 |
| Q96PU8-9                   | QKI_HUMAN Isoform 6 of Protein quaking OS=Homo sapiens GN=QKI                                                                                                                      |            | 144.43 |
| Q96PU8;Q96PU8-3;Q96PU8     | QKI_HUMAN Protein quaking OS=Homo sapiens GN=QKI PE=1 SV=1;>sp Q96PU8-3 QKI_HUMAN Isoform 2 of Protein quaking OS=H                                                                | 3.86E-09   |        |
| Q96PV0                     | SYGP1_HUMAN Ras GTPase-activating protein SynGAP OS=Homo sapiens GN=SYNGAP1 PE=1 SV=4                                                                                              |            | 54.19  |
| Q96PV0-2                   | SYGP1_HUMAN Isoform 2 of Ras GTPase-activating protein SynGAP OS=Homo sapiens GN=SYNGAP1                                                                                           |            | 54.19  |
| Q96PV0-3                   | SYGP1_HUMAN Isoform 3 of Ras GTPase-activating protein SynGAP OS=Homo sapiens GN=SYNGAP1                                                                                           |            | 54.19  |
| Q96PV0-4                   | SYGP1_HUMAN Isoform 4 of Ras GTPase-activating protein SynGAP OS=Homo sapiens GN=SYNGAP1                                                                                           |            | 54.19  |
| Q96PV4                     | PNMA5_HUMAN Paraneoplastic antigen-like protein 5 OS=Homo sapiens GN=PNMA5 PE=2 SV=2                                                                                               |            | 29.22  |
| Q96PX9                     | PKH4B_HUMAN Pleckstrin homology domain-containing family G member 4B OS=Homo sapiens GN=PLEKHG4B PE=2 SV=4                                                                         | 1.48E-10   |        |
| Q96PY0                     | K1908_HUMAN Uncharacterized protein KIAA1908 OS=Homo sapiens GN=KIAA1908 PE=2 SV=2                                                                                                 |            |        |
| Q96PY5                     | FMNL2_HUMAN Formin-like protein 2 OS=Homo sapiens GN=FMNL2 PE=1 SV=3                                                                                                               |            | 84.5   |
| Q96PY5-3                   | FMNL2_HUMAN Isoform 2 of Formin-like protein 2 OS=Homo sapiens GN=FMNL2                                                                                                            |            | 84.5   |
| Q96PY5-3;Q96PY5;Q8IVF7     | FMNL2_HUMAN Isoform 2 of Formin-like protein 2 OS=Homo sapiens GN=FMNL2;>sp Q96PY5 FMNL2_HUMAN Formin-like protein 2                                                               | 5.83E-06   |        |
| Q96PZ0                     | PUS7_HUMAN Pseudouridylate synthase 7 homolog OS=Homo sapiens GN=PUS7 PE=1 SV=2                                                                                                    |            | 37.82  |
| Q96Q06-2;Q96Q06            | PLIN4_HUMAN Isoform 2 of Perilipin-4 OS=Homo sapiens GN=PLIN4;>sp Q96Q06 PLIN4_HUMAN Perilipin-4 OS=Homo sapiens GN=                                                               | 1.12E-93   |        |
| Q96Q11;C9JKA2;Q96Q11-1     | TRNT1_HUMAN tRNA-nucleotidyltransferase 1, mitochondrial OS=Homo sapiens GN=TRNT1 PE=1 SV=2;>tr C9JKA2 C9JKA2_HUMAN                                                                | 3.23E-05   |        |
| Q96Q11;Q96Q11-2            | TRNT1_HUMAN CCA tRNA nucleotidyltransferase 1, mitochondrial OS=Homo sapiens GN=TRNT1 PE=1 SV=2;>sp Q96Q11-2 TRNT1_H                                                               | 1.41E-15   |        |
| Q96Q15                     | SMG1_HUMAN Serine/threonine-protein kinase SMG1 OS=Homo sapiens GN=SMG1 PE=1 SV=3                                                                                                  |            | 50.43  |
| Q96Q15-2                   | SMG1_HUMAN Isoform 2 of Serine/threonine-protein kinase SMG1 OS=Homo sapiens GN=SMG1                                                                                               |            | 50.43  |
| Q96Q15-3                   | SMG1_HUMAN Isoform 3 of Serine/threonine-protein kinase SMG1 OS=Homo sapiens GN=SMG1                                                                                               |            | 50.43  |
| Q96Q15-4                   | SMG1_HUMAN Isoform 4 of Serine/threonine-protein kinase SMG1 OS=Homo sapiens GN=SMG1                                                                                               |            | 50.34  |
| Q96Q15;Q96Q15-2;Q96Q15     | SMG1_HUMAN Serine/threonine-protein kinase SMG1 OS=Homo sapiens GN=SMG1 PE=1 SV=3;>sp Q96Q15-2 SMG1_HUMAN Isoform                                                                  | 2.78E-12   |        |
| Q96Q40                     | CDK15_HUMAN Cyclin-dependent kinase 15 OS=Homo sapiens GN=CDK15 PE=1 SV=2                                                                                                          |            | 60.32  |
| Q96Q40-2                   | CDK15_HUMAN Isoform 2 of Cyclin-dependent kinase 15 OS=Homo sapiens GN=CDK15                                                                                                       |            | 48.96  |
| Q96Q40-3                   | CDK15_HUMAN Isoform 3 of Cyclin-dependent kinase 15 OS=Homo sapiens GN=CDK15                                                                                                       |            | 58.74  |
| Q96Q40-4                   | CDK15_HUMAN Isoform 4 of Cyclin-dependent kinase 15 OS=Homo sapiens GN=CDK15                                                                                                       |            | 60.45  |
| Q96Q89-2;C9J6W2;Q96Q89     | KIF20B_HUMAN Isoform 2 of Kinesin-like protein KIF20B OS=Homo sapiens GN=KIF20B;>tr C9J6W2 C9J6W2_HUMAN Uncharacteriz                                                              | 4.05E-06   |        |
| Q96Q89-4;Q96Q89;Q96Q89     | KIF20B_HUMAN Isoform 4 of Kinesin-like protein KIF20B OS=Homo sapiens GN=KIF20B;>sp Q96Q89 KIF20B_HUMAN Kinesin-like pr                                                            | 2.39E-13   |        |
| Q96QA5                     | GSDMA_HUMAN Gasdermin-A OS=Homo sapiens GN=GSDMA PE=2 SV=4                                                                                                                         |            | 59.91  |
| Q96QC0                     | PPP1R10_HUMAN Serine/threonine-protein phosphatase 1 regulatory subunit 10 OS=Homo sapiens GN=PPP1R10 PE=1 SV=1                                                                    |            |        |
| Q96QE4                     | LRRC37B_HUMAN Leucine-rich repeat-containing protein 37B OS=Homo sapiens GN=LRRC37B PE=2 SV=3                                                                                      |            |        |
| Q96QE5                     | TEFM_HUMAN Transcription elongation factor, mitochondrial OS=Homo sapiens GN=TEFM PE=1 SV=1                                                                                        |            |        |
| Q96QH2                     | PRAM1_HUMAN PML-RARA-regulated adapter molecule 1 OS=Homo sapiens GN=PRAM1 PE=1 SV=2                                                                                               |            |        |
| Q96QH2-2                   | PRAM1_HUMAN Isoform 2 of PML-RARA-regulated adapter molecule 1 OS=Homo sapiens GN=PRAM1                                                                                            |            |        |
| Q96QK1                     | VPS35_HUMAN Vacuolar protein sorting-associated protein 35 OS=Homo sapiens GN=VPS35 PE=1 SV=2                                                                                      |            | 408.16 |
| Q96QR8                     | PURB_HUMAN Transcriptional activator protein Pur-beta OS=Homo sapiens GN=PURB PE=1 SV=3                                                                                            |            | 124.85 |
| Q96QS3                     | ARX_HUMAN Homeobox protein ARX OS=Homo sapiens GN=ARX PE=1 SV=1                                                                                                                    |            |        |
| Q96QU6                     | ACCS_HUMAN 1-aminocyclopropane-1-carboxylate synthase-like protein 1 OS=Homo sapiens GN=ACCS PE=2 SV=1                                                                             |            |        |
| Q96QV6                     | H2A1A_HUMAN Histone H2A type 1-A OS=Homo sapiens GN=HIST1H2AA PE=1 SV=3                                                                                                            |            | 145.19 |
| Q96R06                     | SPAG5_HUMAN Sperm-associated antigen 5 OS=Homo sapiens GN=SPAG5 PE=1 SV=2                                                                                                          | 2.68E-23   |        |
| Q96R72                     | OR4K3_HUMAN Olfactory receptor 4K3 OS=Homo sapiens GN=OR4K3 PE=3 SV=3                                                                                                              |            |        |
| Q96RD7                     | PANX1_HUMAN Pannexin-1 OS=Homo sapiens GN=PANX1 PE=1 SV=4                                                                                                                          |            |        |
| Q96RD7-2                   | PANX1_HUMAN Isoform 2 of Pannexin-1 OS=Homo sapiens GN=PANX1                                                                                                                       |            |        |
| Q96RE7                     | NACC1_HUMAN Nucleus accumbens-associated protein 1 OS=Homo sapiens GN=NACC1 PE=1 SV=1                                                                                              | 0.00024605 |        |
| Q96RK0                     | CIC_HUMAN Protein capicua homolog OS=Homo sapiens GN=CIC PE=1 SV=2                                                                                                                 | 9.64E-10   |        |
| Q96RM1                     | SPRR2F_HUMAN Small proline-rich protein 2F OS=Homo sapiens GN=SPRR2F PE=2 SV=1                                                                                                     |            | 23.4   |
| Q96RN5                     | MED15_HUMAN Mediator of RNA polymerase II transcription subunit 15 OS=Homo sapiens GN=MED15 PE=1 SV=2                                                                              |            |        |
| Q96RN5-2                   | MED15_HUMAN Isoform 2 of Mediator of RNA polymerase II transcription subunit 15 OS=Homo sapiens GN=MED15                                                                           |            |        |

|                                                                                                                                             |                                                                                                                       |           |        |
|---------------------------------------------------------------------------------------------------------------------------------------------|-----------------------------------------------------------------------------------------------------------------------|-----------|--------|
| Q96RN5-3                                                                                                                                    | MED15_HUMAN Isoform 3 of Mediator of RNA polymerase II transcription subunit 15 OS=Homo sapiens GN=MED15              |           |        |
| Q96RP9-2;Q96RP9;C9IZ0.2 EFGM_HUMAN Isoform 2 of Elongation factor G, mitochondrial OS=Homo sapiens GN=GFM1;>sp Q96RP9 EFGM_HUMAN Elongation |                                                                                                                       | 1.09E-20  |        |
| Q96RP9;Q96RP9-2                                                                                                                             | EFGM_HUMAN Elongation factor G, mitochondrial OS=Homo sapiens GN=GFM1 PE=1 SV=2;>sp Q96RP9-2 EFGM_HUMAN Isoform 2 c   | 7.29E-64  |        |
| Q96RQ3                                                                                                                                      | MCCA_HUMAN Methylcrotonoyl-CoA carboxylase subunit alpha, mitochondrial OS=Homo sapiens GN=MCCC1 PE=1 SV=3            |           |        |
| Q96RQ9-2;Q96RQ9                                                                                                                             | 2 OXLA_HUMAN Isoform 2 of L-amino-acid oxidase OS=Homo sapiens GN=IL4I1;>sp Q96RQ9 OXLA_HUMAN L-amino-acid oxidase OS | 1.49E-12  |        |
| Q96RS0                                                                                                                                      | TGS1_HUMAN Trimethylguanosine synthase OS=Homo sapiens GN=TGS1 PE=1 SV=3                                              |           |        |
| Q96RS6                                                                                                                                      | NUDC1_HUMAN NudC domain-containing protein 1 OS=Homo sapiens GN=NUDCD1 PE=1 SV=2                                      |           | 55.13  |
| Q96RS6-2                                                                                                                                    | NUDC1_HUMAN Isoform 2 of NudC domain-containing protein 1 OS=Homo sapiens GN=NUDCD1                                   |           | 57.35  |
| Q96RS6-3                                                                                                                                    | NUDC1_HUMAN Isoform 3 of NudC domain-containing protein 1 OS=Homo sapiens GN=NUDCD1                                   |           | 24.71  |
| Q96RS6;Q96RS6-2;Q96RS6-3                                                                                                                    | NUDC1_HUMAN NudC domain-containing protein 1 OS=Homo sapiens GN=NUDCD1 PE=1 SV=2;>sp Q96RS6-2 NUDC1_HUMAN Isofo       | 0         |        |
| Q96RT1                                                                                                                                      | LAP2_HUMAN Protein LAP2 OS=Homo sapiens GN=ERBB2IP PE=1 SV=2                                                          |           | 165.28 |
| Q96RT1-2                                                                                                                                    | LAP2_HUMAN Isoform 2 of Protein LAP2 OS=Homo sapiens GN=ERBB2IP                                                       |           | 165.28 |
| Q96RT1-3                                                                                                                                    | LAP2_HUMAN Isoform 3 of Protein LAP2 OS=Homo sapiens GN=ERBB2IP                                                       |           | 165.28 |
| Q96RT1-4                                                                                                                                    | LAP2_HUMAN Isoform 4 of Protein LAP2 OS=Homo sapiens GN=ERBB2IP                                                       |           | 165.28 |
| Q96RT1-5                                                                                                                                    | LAP2_HUMAN Isoform 5 of Protein LAP2 OS=Homo sapiens GN=ERBB2IP                                                       |           | 165.28 |
| Q96RT1-6                                                                                                                                    | LAP2_HUMAN Isoform 6 of Protein LAP2 OS=Homo sapiens GN=ERBB2IP                                                       |           | 165.28 |
| Q96RT1-7                                                                                                                                    | LAP2_HUMAN Isoform 7 of Protein LAP2 OS=Homo sapiens GN=ERBB2IP                                                       |           | 165.28 |
| Q96RT1;Q96RT1-2;Q96RT1-3;Q96RT1-4;Q96RT1-5;Q96RT1-6;Q96RT1-7                                                                                | LAP2_HUMAN Protein LAP2 OS=Homo sapiens GN=ERBB2IP PE=1 SV=2;>sp Q96RT1-2 LAP2_HUMAN Isoform 2 of Protein LAP2 OS=I   | 8.57E-30  |        |
| Q96RT7;Q96RT7-3;Q96RT7-4                                                                                                                    | GCP6_HUMAN Gamma-tubulin complex component 6 OS=Homo sapiens GN=TUBGCP6 PE=1 SV=3;>sp Q96RT7-3 GCP6_HUMAN Isof        | 1.19E-08  |        |
| Q96RU2;Q96RU2-2                                                                                                                             | UBP28_HUMAN Ubiquitin carboxyl-terminal hydrolase 28 OS=Homo sapiens GN=USP28 PE=1 SV=1;>sp Q96RU2-2 UBP28_HUMAN Is   | 2.53E-06  |        |
| Q96RU3;Q96RU3-2;B7ZL1                                                                                                                       | FNBP1_HUMAN Formin-binding protein 1 OS=Homo sapiens GN=FNBP1 PE=1 SV=2;>sp Q96RU3-2 FNBP1_HUMAN Isoform 2 of Form    | 4.73E-89  |        |
| Q96RU8                                                                                                                                      | TRIB1_HUMAN Tribbles homolog 1 OS=Homo sapiens GN=TRIB1 PE=1 SV=2                                                     |           | 23.24  |
| Q96RW7                                                                                                                                      | HMCN1_HUMAN Hemicentin-1 OS=Homo sapiens GN=HMCN1 PE=1 SV=2                                                           |           |        |
| Q96RW7-2                                                                                                                                    | HMCN1_HUMAN Isoform 2 of Hemicentin-1 OS=Homo sapiens GN=HMCN1                                                        |           |        |
| Q96S19;Q96S19-2;Q96S19-3                                                                                                                    | CP013_HUMAN UPF0585 protein C16orf13 OS=Homo sapiens GN=C16orf13 PE=1 SV=2;>sp Q96S19-2 CP013_HUMAN Isoform 2 of U    | 1.34E-09  |        |
| Q96S44                                                                                                                                      | PRPK_HUMAN TP53-regulating kinase OS=Homo sapiens GN=TP53RK PE=1 SV=2                                                 |           | 45.67  |
| Q96S52                                                                                                                                      | PIGS_HUMAN GPI transamidase component PIG-S OS=Homo sapiens GN=PIGS PE=1 SV=3                                         |           |        |
| Q96S52-2                                                                                                                                    | PIGS_HUMAN Isoform 2 of GPI transamidase component PIG-S OS=Homo sapiens GN=PIGS                                      |           |        |
| Q96S52;Q96S52-2                                                                                                                             | PIGS_HUMAN GPI transamidase component PIG-S OS=Homo sapiens GN=PIGS PE=1 SV=3;>sp Q96S52-2 PIGS_HUMAN Isoform 2 o     | 3.14E-14  |        |
| Q96S55;Q96S55-2;B3KT2                                                                                                                       | WRIP1_HUMAN ATPase WRNIP1 OS=Homo sapiens GN=WRNIP1 PE=1 SV=2;>sp Q96S55-2 WRIP1_HUMAN Isoform 2 of ATPase WRN        | 1.98E-48  |        |
| Q96S59;B2R8E1;Q96S59-2                                                                                                                      | RANBP9_HUMAN Ran-binding protein 9 OS=Homo sapiens GN=RANBP9 PE=1 SV=1;>tr B2R8E1 B2R8E1_HUMAN cDNA, FLJ93856, Ho     | 1.18E-50  |        |
| Q96S66                                                                                                                                      | CLCC1_HUMAN Chloride channel CLIC-like protein 1 OS=Homo sapiens GN=CLCC1 PE=1 SV=1                                   |           |        |
| Q96S66-2                                                                                                                                    | CLCC1_HUMAN Isoform 2 of Chloride channel CLIC-like protein 1 OS=Homo sapiens GN=CLCC1                                |           |        |
| Q96S66-3                                                                                                                                    | CLCC1_HUMAN Isoform 3 of Chloride channel CLIC-like protein 1 OS=Homo sapiens GN=CLCC1                                |           |        |
| Q96S66-4                                                                                                                                    | CLCC1_HUMAN Isoform 4 of Chloride channel CLIC-like protein 1 OS=Homo sapiens GN=CLCC1                                |           |        |
| Q96S66;Q96S66-2;Q96S66-3;Q96S66-4                                                                                                           | CLCC1_HUMAN Chloride channel CLIC-like protein 1 OS=Homo sapiens GN=CLCC1 PE=1 SV=1;>sp Q96S66-2 CLCC1_HUMAN Isoform  | 6.58E-20  |        |
| Q96S86                                                                                                                                      | HPLN3_HUMAN Hyaluronan and proteoglycan link protein 3 OS=Homo sapiens GN=HAPLN3 PE=2 SV=1                            | 1.44E-13  |        |
| Q96S97                                                                                                                                      | MYADM_HUMAN Myeloid-associated differentiation marker OS=Homo sapiens GN=MYADM PE=1 SV=2                              |           | 378.31 |
| Q96S99                                                                                                                                      | PKHF1_HUMAN Pleckstrin homology domain-containing family F member 1 OS=Homo sapiens GN=PLEKHF1 PE=1 SV=3              | 2.03E-08  |        |
| Q96SB3                                                                                                                                      | NEB2_HUMAN Neurabin-2 OS=Homo sapiens GN=PPP1R9B PE=1 SV=2                                                            | 1.28E-11  |        |
| Q96SB4                                                                                                                                      | SRPK1_HUMAN Serine/threonine-protein kinase SRPK1 OS=Homo sapiens GN=SRPK1 PE=1 SV=2                                  |           | 216.01 |
| Q96SB8                                                                                                                                      | SMC6_HUMAN Structural maintenance of chromosomes protein 6 OS=Homo sapiens GN=SMC6 PE=1 SV=2                          |           |        |
| Q96SB8-2                                                                                                                                    | SMC6_HUMAN Isoform 2 of Structural maintenance of chromosomes protein 6 OS=Homo sapiens GN=SMC6                       |           |        |
| Q96SI9                                                                                                                                      | STRBP_HUMAN Spermatid perinuclear RNA-binding protein OS=Homo sapiens GN=STRBP PE=1 SV=1                              |           | 142.03 |
| Q96SI9-2                                                                                                                                    | STRBP_HUMAN Isoform 2 of Spermatid perinuclear RNA-binding protein OS=Homo sapiens GN=STRBP                           |           | 142.03 |
| Q96SI9;Q96SI9-2                                                                                                                             | STRBP_HUMAN Spermatid perinuclear RNA-binding protein OS=Homo sapiens GN=STRBP PE=1 SV=1;>sp Q96SI9-2 STRBP_HUMAN     | 2.40E-108 |        |
| Q96SL4                                                                                                                                      | GPX7_HUMAN Glutathione peroxidase 7 OS=Homo sapiens GN=GPX7 PE=1 SV=1                                                 | 5.49E-07  |        |
| Q96ST2                                                                                                                                      | IWS1_HUMAN Protein IWS1 homolog OS=Homo sapiens GN=IWS1 PE=1 SV=2                                                     |           | 103.59 |
| Q96ST2-2                                                                                                                                    | IWS1_HUMAN Isoform 2 of Protein IWS1 homolog OS=Homo sapiens GN=IWS1                                                  |           | 103.59 |
| Q96ST2-3                                                                                                                                    | IWS1_HUMAN Isoform 3 of Protein IWS1 homolog OS=Homo sapiens GN=IWS1                                                  |           | 103.59 |
| Q96ST2;B4DL52;B4DGM5                                                                                                                        | IWS1_HUMAN Protein IWS1 homolog OS=Homo sapiens GN=IWS1 PE=1 SV=2;>tr B4DL52 B4DL52_HUMAN cDNA FLJ54017, highly s     | 8.56E-07  |        |
| Q96ST3                                                                                                                                      | SIN3A_HUMAN Paired amphipathic helix protein Sin3a OS=Homo sapiens GN=SIN3A PE=1 SV=2                                 |           |        |
| Q96ST8                                                                                                                                      | CEP89_HUMAN Centrosomal protein of 89 kDa OS=Homo sapiens GN=CEP89 PE=1 SV=3                                          |           | 43.36  |
| Q96ST8-2                                                                                                                                    | CEP89_HUMAN Isoform 2 of Centrosomal protein of 89 kDa OS=Homo sapiens GN=CEP89                                       |           | 38.8   |
| Q96ST8-3                                                                                                                                    | CEP89_HUMAN Isoform 3 of Centrosomal protein of 89 kDa OS=Homo sapiens GN=CEP89                                       |           | 4.56   |
| Q96SU4                                                                                                                                      | OSBL9_HUMAN Oxysterol-binding protein-related protein 9 OS=Homo sapiens GN=OSBPL9 PE=1 SV=2                           |           |        |
| Q96SU4-2                                                                                                                                    | OSBL9_HUMAN Isoform 2 of Oxysterol-binding protein-related protein 9 OS=Homo sapiens GN=OSBPL9                        |           |        |
| Q96SU4-3                                                                                                                                    | OSBL9_HUMAN Isoform 3 of Oxysterol-binding protein-related protein 9 OS=Homo sapiens GN=OSBPL9                        |           |        |
| Q96SU4-4                                                                                                                                    | OSBL9_HUMAN Isoform 4 of Oxysterol-binding protein-related protein 9 OS=Homo sapiens GN=OSBPL9                        |           |        |
| Q96SU4-5                                                                                                                                    | OSBL9_HUMAN Isoform 5 of Oxysterol-binding protein-related protein 9 OS=Homo sapiens GN=OSBPL9                        |           |        |
| Q96T23                                                                                                                                      | RSF1_HUMAN Remodeling and spacing factor 1 OS=Homo sapiens GN=RSF1 PE=1 SV=2                                          |           | 37.7   |

|                             |                                                                                                                        |           |         |
|-----------------------------|------------------------------------------------------------------------------------------------------------------------|-----------|---------|
| Q96T23-2                    | RSF1_HUMAN Isoform 2 of Remodeling and spacing factor 1 OS=Homo sapiens GN=RSF1                                        |           | 34.83   |
| Q96T23-3                    | RSF1_HUMAN Isoform 3 of Remodeling and spacing factor 1 OS=Homo sapiens GN=RSF1                                        |           | 4.05    |
| Q96T23;Q96T23-2;Q96T23-3    | RSF1_HUMAN Remodeling and spacing factor 1 OS=Homo sapiens GN=RSF1 PE=1 SV=2;>sp Q96T23-2 RSF1_HUMAN Isoform 2 of R    | 3.60E-20  |         |
| Q96T25                      | ZIC5_HUMAN Zinc finger protein ZIC 5 OS=Homo sapiens GN=ZIC5 PE=1 SV=2                                                 |           | 7.49    |
| Q96T37                      | RBM15_HUMAN Putative RNA-binding protein 15 OS=Homo sapiens GN=RBM15 PE=1 SV=2                                         |           |         |
| Q96T37-2                    | RBM15_HUMAN Isoform 2 of Putative RNA-binding protein 15 OS=Homo sapiens GN=RBM15                                      |           |         |
| Q96T37-3                    | RBM15_HUMAN Isoform 3 of Putative RNA-binding protein 15 OS=Homo sapiens GN=RBM15                                      |           |         |
| Q96T37;Q3ZB86;Q96T37-2      | RBM15_HUMAN Putative RNA-binding protein 15 OS=Homo sapiens GN=RBM15 PE=1 SV=2;>tr Q3ZB86 Q3ZB86_HUMAN RBM15 pro       | 2.14E-05  |         |
| Q96T51                      | RUFY1_HUMAN RUN and FYVE domain-containing protein 1 OS=Homo sapiens GN=RUFY1 PE=1 SV=2                                |           | 29.78   |
| Q96T51-2                    | RUFY1_HUMAN Isoform 2 of RUN and FYVE domain-containing protein 1 OS=Homo sapiens GN=RUFY1                             |           | 29.78   |
| Q96T51-3                    | RUFY1_HUMAN Isoform 3 of RUN and FYVE domain-containing protein 1 OS=Homo sapiens GN=RUFY1                             |           | 29.26   |
| Q96T51;A8MSJ1;A8K7B1;Q96T58 | RUFY1_HUMAN RUN and FYVE domain-containing protein 1 OS=Homo sapiens GN=RUFY1 PE=1 SV=2;>tr A8MSJ1 A8MSJ1_HUMAN U      | 1.61E-58  |         |
| Q96T60                      | MINT_HUMAN Msx2-interacting protein OS=Homo sapiens GN=SPEN PE=1 SV=1                                                  |           |         |
| Q96T76                      | PNKP_HUMAN Bifunctional polynucleotide phosphatase/kinase OS=Homo sapiens GN=PNKP PE=1 SV=1                            |           |         |
| Q96T76-5                    | MMS19_HUMAN MMS19 nucleotide excision repair protein homolog OS=Homo sapiens GN=MMS19 PE=1 SV=2                        |           | 13.77   |
| Q96T76-7                    | MMS19_HUMAN Isoform 4 of MMS19 nucleotide excision repair protein homolog OS=Homo sapiens GN=MMS19                     |           | 13.77   |
| Q96T76;Q96T76-5             | MMS19_HUMAN MMS19 nucleotide excision repair protein homolog OS=Homo sapiens GN=MMS19 PE=1 SV=2;>sp Q96T76-5 MMS19     | 1.82E-69  |         |
| Q96T88                      | UHRF1_HUMAN E3 ubiquitin-protein ligase UHRF1 OS=Homo sapiens GN=UHRF1 PE=1 SV=1                                       |           | 22.87   |
| Q96TA0                      | PCDBI_HUMAN Putative protocadherin beta-18 OS=Homo sapiens GN=PCDHB18 PE=5 SV=1                                        |           |         |
| Q96TA1                      | NIBL1_HUMAN Niban-like protein 1 OS=Homo sapiens GN=FAM129B PE=1 SV=2                                                  |           | 1074.46 |
| Q96TA1-2;Q96TA1             | 2 NIBL1_HUMAN Isoform 2 of Niban-like protein 1 OS=Homo sapiens GN=FAM129B;>sp Q96TA1 NIBL1_HUMAN Niban-like protein 1 | 7.19E-286 |         |
| Q96TA1;Q96TA1-2             | NIBL1_HUMAN Niban-like protein 1 OS=Homo sapiens GN=FAM129B PE=1 SV=3;>sp Q96TA1-2 NIBL1_HUMAN Isoform 2 of Niban-li   | 7.34E-204 |         |
| Q96TA2                      | YME1L1_HUMAN ATP-dependent zinc metalloprotease YME1L1 OS=Homo sapiens GN=YME1L1 PE=1 SV=2                             |           | 94.05   |
| Q96TA2-2                    | YME1L1_HUMAN Isoform 2 of ATP-dependent zinc metalloprotease YME1L1 OS=Homo sapiens GN=YME1L1                          |           | 93.6    |
| Q96TA2;Q96TA2-2             | YME1L1_HUMAN ATP-dependent zinc metalloprotease YME1L1 OS=Homo sapiens GN=YME1L1 PE=1 SV=2;>sp Q96TA2-2 YME1L1_HUM     | 5.04E-73  |         |
| Q96TC7                      | RMD3_HUMAN Regulator of microtubule dynamics protein 3 OS=Homo sapiens GN=FAM82A2 PE=1 SV=2                            | 9.76E-10  |         |
| Q99062                      | CSF3R_HUMAN Granulocyte colony-stimulating factor receptor OS=Homo sapiens GN=CSF3R PE=1 SV=1                          |           |         |
| Q99062-2                    | CSF3R_HUMAN Isoform 2 of Granulocyte colony-stimulating factor receptor OS=Homo sapiens GN=CSF3R                       |           |         |
| Q99062-3                    | CSF3R_HUMAN Isoform 3 of Granulocyte colony-stimulating factor receptor OS=Homo sapiens GN=CSF3R                       |           |         |
| Q99062-4                    | CSF3R_HUMAN Isoform 4 of Granulocyte colony-stimulating factor receptor OS=Homo sapiens GN=CSF3R                       |           |         |
| Q99250                      | SCN2A_HUMAN Sodium channel protein type 2 subunit alpha OS=Homo sapiens GN=SCN2A PE=1 SV=3                             |           |         |
| Q99250-2                    | SCN2A_HUMAN Isoform 2 of Sodium channel protein type 2 subunit alpha OS=Homo sapiens GN=SCN2A                          |           |         |
| Q99417                      | MYCBP_HUMAN C-Myc-binding protein OS=Homo sapiens GN=MYCBP PE=1 SV=3                                                   |           | 174.99  |
| Q99426                      | TBCB_HUMAN Tubulin-folding cofactor B OS=Homo sapiens GN=TBCB PE=1 SV=2                                                |           | 71.27   |
| Q99436                      | PSB7_HUMAN Proteasome subunit beta type-7 OS=Homo sapiens GN=PSMB7 PE=1 SV=1                                           |           | 297.72  |
| Q99439                      | CNN2_HUMAN Calponin-2 OS=Homo sapiens GN=CNN2 PE=1 SV=4                                                                |           | 203.63  |
| Q99442                      | SEC62_HUMAN Translocation protein SEC62 OS=Homo sapiens GN=SEC62 PE=1 SV=1                                             |           | 41.09   |
| Q99447                      | PCYT2_HUMAN Ethanolamine-phosphate cytidyltransferase OS=Homo sapiens GN=PCYT2 PE=1 SV=1                               | 2.13E-43  |         |
| Q99453                      | PHX2B_HUMAN Paired mesoderm homeobox protein 2B OS=Homo sapiens GN=PHOX2B PE=1 SV=2                                    |           |         |
| Q99456                      | K1C12_HUMAN Keratin, type I cytoskeletal 12 OS=Homo sapiens GN=KRT12 PE=1 SV=1                                         |           | 130.52  |
| Q99459                      | CDC5L_HUMAN Cell division cycle 5-like protein OS=Homo sapiens GN=CDC5L PE=1 SV=2                                      |           | 263.38  |
| Q99460                      | PSMD1_HUMAN 26S proteasome non-ATPase regulatory subunit 1 OS=Homo sapiens GN=PSMD1 PE=1 SV=2                          |           | 317.69  |
| Q99460-2                    | PSMD1_HUMAN Isoform 2 of 26S proteasome non-ATPase regulatory subunit 1 OS=Homo sapiens GN=PSMD1                       |           | 317.69  |
| Q99460;Q99460-2             | PSMD1_HUMAN 26S proteasome non-ATPase regulatory subunit 1 OS=Homo sapiens GN=PSMD1 PE=1 SV=2;>sp Q99460-2 PSMD1_      | 0         |         |
| Q99470                      | SDF2_HUMAN Stromal cell-derived factor 2 OS=Homo sapiens GN=SDF2 PE=1 SV=2                                             | 8.93E-10  |         |
| Q99471                      | PFD5_HUMAN Prefoldin subunit 5 OS=Homo sapiens GN=PFDN5 PE=1 SV=2                                                      |           | 335.18  |
| Q99490;Q99490-2             | AGAP2_HUMAN Arf-GAP with GTPase, ANK repeat and PH domain-containing protein 2 OS=Homo sapiens GN=AGAP2 PE=1 SV=2;>sp  | 4.19E-05  |         |
| Q99496                      | RING2_HUMAN E3 ubiquitin-protein ligase RING2 OS=Homo sapiens GN=RNF2 PE=1 SV=1                                        |           |         |
| Q99497                      | PARK7_HUMAN Protein DJ-1 OS=Homo sapiens GN=PARK7 PE=1 SV=2                                                            |           | 639.76  |
| Q99504;Q8IVX7;B4DIR7;Q99523 | EYA3_HUMAN Eyes absent homolog 3 OS=Homo sapiens GN=EYA3 PE=1 SV=3;>tr Q8IVX7 Q8IVX7_HUMAN EYA3 protein OS=Homo        | 9.24E-07  |         |
| Q99536                      | VAT1_HUMAN Synaptic vesicle membrane protein VAT-1 homolog OS=Homo sapiens GN=VAT1 PE=1 SV=2                           |           | 483.16  |
| Q99538                      | LGMMN_HUMAN Legumain OS=Homo sapiens GN=LGMMN PE=1 SV=1                                                                | 6.97E-22  |         |
| Q99541                      | PLIN2_HUMAN Perilipin-2 OS=Homo sapiens GN=PLIN2 PE=1 SV=2                                                             | 7.74E-11  |         |
| Q99543                      | DNJC2_HUMAN DnaJ homolog subfamily C member 2 OS=Homo sapiens GN=DNAJC2 PE=1 SV=4                                      |           | 28.83   |
| Q99543-2                    | DNJC2_HUMAN Isoform 2 of DnaJ homolog subfamily C member 2 OS=Homo sapiens GN=DNAJC2                                   |           | 28.83   |
| Q99543;A4VCI0;Q99543-2      | DNJC2_HUMAN DnaJ homolog subfamily C member 2 OS=Homo sapiens GN=DNAJC2 PE=1 SV=4;>tr A4VCI0 A4VCI0_HUMAN DNAJC        | 2.68E-10  |         |
| Q99547                      | MPH6_HUMAN M-phase phosphoprotein 6 OS=Homo sapiens GN=MPHOSPH6 PE=1 SV=2                                              |           | 216.18  |
| Q99549                      | MPP8_HUMAN M-phase phosphoprotein 8 OS=Homo sapiens GN=MPHOSPH8 PE=1 SV=2                                              |           |         |
| Q99549-2                    | MPP8_HUMAN Isoform 2 of M-phase phosphoprotein 8 OS=Homo sapiens GN=MPHOSPH8                                           |           |         |



|                       |                                                                                                                       |            |        |
|-----------------------|-----------------------------------------------------------------------------------------------------------------------|------------|--------|
| Q99558                | M3K14_HUMAN Mitogen-activated protein kinase kinase kinase 14 OS=Homo sapiens GN=MAP3K14 PE=1 SV=2                    |            |        |
| Q99567                | NUP88_HUMAN Nuclear pore complex protein Nup88 OS=Homo sapiens GN=NUP88 PE=1 SV=2                                     | 1.63E-33   |        |
| Q99570                | PI3R4_HUMAN Phosphoinositide 3-kinase regulatory subunit 4 OS=Homo sapiens GN=PIK3R4 PE=1 SV=3                        | 9.39E-13   |        |
| Q99574                | NEUS_HUMAN Neuroserpin OS=Homo sapiens GN=SERPINI1 PE=1 SV=1                                                          | 2.10E-14   |        |
| Q99575                | POP1_HUMAN Ribonucleases P/MRP protein subunit POP1 OS=Homo sapiens GN=POP1 PE=1 SV=2                                 |            | 164.02 |
| Q99584                | S10AD_HUMAN Protein S100-A13 OS=Homo sapiens GN=S100A13 PE=1 SV=1                                                     |            | 37.89  |
| Q99590;Q99590-2       | SCAFB_HUMAN Protein SCAF11 OS=Homo sapiens GN=SCAF11 PE=1 SV=2;>sp Q99590-2 SCAFB_HUMAN Isoform 2 of Protein SCAF     | 9.65E-09   |        |
| Q99594                | TEAD3_HUMAN Transcriptional enhancer factor TEF-5 OS=Homo sapiens GN=TEAD3 PE=1 SV=2                                  |            | 22.7   |
| Q99598                | TSNAX_HUMAN Translin-associated protein X OS=Homo sapiens GN=TSNAX PE=1 SV=1                                          |            | 50.4   |
| Q99611                | SPS2_HUMAN Selenide, water dikinase 2 OS=Homo sapiens GN=SEPHS2 PE=1 SV=3                                             | 1.88E-06   |        |
| Q99612                | KLF6_HUMAN Krueppel-like factor 6 OS=Homo sapiens GN=KLF6 PE=1 SV=3                                                   |            |        |
| Q99612-2              | KLF6_HUMAN Isoform 2 of Krueppel-like factor 6 OS=Homo sapiens GN=KLF6                                                |            |        |
| Q99613                | EIF3C_HUMAN Eukaryotic translation initiation factor 3 subunit C OS=Homo sapiens GN=EIF3C PE=1 SV=1                   |            | 396.65 |
| Q99614                | TTC1_HUMAN Tetratricopeptide repeat protein 1 OS=Homo sapiens GN=TTC1 PE=1 SV=1                                       | 1.79E-16   |        |
| Q99615                | DNJC7_HUMAN DnaJ homolog subfamily C member 7 OS=Homo sapiens GN=DNAJC7 PE=1 SV=2                                     | 4.09E-28   |        |
| Q99618                | CDCA3_HUMAN Cell division cycle-associated protein 3 OS=Homo sapiens GN=CDCA3 PE=1 SV=1                               |            |        |
| Q99622                | C10_HUMAN Protein C10 OS=Homo sapiens GN=C12orf57 PE=1 SV=1                                                           | 3.27E-64   |        |
| Q99623                | PHB2_HUMAN Prohibitin-2 OS=Homo sapiens GN=PHB2 PE=1 SV=2                                                             |            | 685.5  |
| Q99627                | CSN8_HUMAN COP9 signalosome complex subunit 8 OS=Homo sapiens GN=COPS8 PE=1 SV=1                                      |            | 64.63  |
| Q99643                | C560_HUMAN Succinate dehydrogenase cytochrome b560 subunit, mitochondrial OS=Homo sapiens GN=SDHC PE=1 SV=1           |            | 109.54 |
| Q99643-3              | C560_HUMAN Isoform 3 of Succinate dehydrogenase cytochrome b560 subunit, mitochondrial OS=Homo sapiens GN=SDHC        |            | 109.54 |
| Q99643-5              | C560_HUMAN Isoform 5 of Succinate dehydrogenase cytochrome b560 subunit, mitochondrial OS=Homo sapiens GN=SDHC        |            | 109.54 |
| Q99643;Q99643-3;Q9964 | C560_HUMAN Succinate dehydrogenase cytochrome b560 subunit, mitochondrial OS=Homo sapiens GN=SDHC PE=1 SV=1;>sp Q996  | 0.00016004 |        |
| Q99653                | CHP1_HUMAN Calcium-binding protein p22 OS=Homo sapiens GN=CHP PE=1 SV=3                                               |            | 192.21 |
| Q99661                | KIF2C_HUMAN Kinesin-like protein KIF2C OS=Homo sapiens GN=KIF2C PE=1 SV=2                                             |            | 45.44  |
| Q99661-2              | KIF2C_HUMAN Isoform 2 of Kinesin-like protein KIF2C OS=Homo sapiens GN=KIF2C                                          |            | 29.61  |
| Q99661;Q99661-2       | KIF2C_HUMAN Kinesin-like protein KIF2C OS=Homo sapiens GN=KIF2C PE=1 SV=2;>sp Q99661-2 KIF2C_HUMAN Isoform 2 of Kines | 8.45E-92   |        |
| Q99665                | I12R2_HUMAN Interleukin-12 receptor subunit beta-2 OS=Homo sapiens GN=IL12RB2 PE=1 SV=1                               |            |        |
| Q99665-2              | I12R2_HUMAN Isoform 2 of Interleukin-12 receptor subunit beta-2 OS=Homo sapiens GN=IL12RB2                            |            |        |
| Q99666                | RGPD5_HUMAN RANBP2-like and GRIP domain-containing protein 5/6 OS=Homo sapiens GN=RGPD5 PE=1 SV=3                     |            | 117.18 |
| Q99666-2              | RGPD5_HUMAN Isoform 2 of RANBP2-like and GRIP domain-containing protein 5/6 OS=Homo sapiens GN=RGPD5                  |            | 89.86  |
| Q99666;O14715         | RGPD5_HUMAN RANBP2-like and GRIP domain-containing protein 5/6 OS=Homo sapiens GN=RGPD5 PE=1 SV=3;>sp O14715 RGPD8    | 2.35E-99   |        |
| Q99674                | CGRE1_HUMAN Cell growth regulator with EF hand domain protein 1 OS=Homo sapiens GN=CGREF1 PE=2 SV=2                   | 8.89E-10   |        |
| Q99698                | LYST_HUMAN Lysosomal-trafficking regulator OS=Homo sapiens GN=LYST PE=1 SV=3                                          |            |        |
| Q99698-2              | LYST_HUMAN Isoform 2 of Lysosomal-trafficking regulator OS=Homo sapiens GN=LYST                                       |            |        |
| Q99698-3              | LYST_HUMAN Isoform 3 of Lysosomal-trafficking regulator OS=Homo sapiens GN=LYST                                       |            |        |
| Q99700;Q99700-4;Q2M2F | ATX2_HUMAN Ataxin-2 OS=Homo sapiens GN=ATXN2 PE=1 SV=2;>sp Q99700-4 ATX2_HUMAN Isoform 4 of Ataxin-2 OS=Homo sapi     | 1.98E-63   |        |
| Q99707                | METH_HUMAN Methionine synthase OS=Homo sapiens GN=MTR PE=1 SV=2                                                       |            | 24.76  |
| Q99714                | HCD2_HUMAN 3-hydroxyacyl-CoA dehydrogenase type-2 OS=Homo sapiens GN=HSD17B10 PE=1 SV=3                               |            | 771.84 |
| Q99714-2              | HCD2_HUMAN Isoform 2 of 3-hydroxyacyl-CoA dehydrogenase type-2 OS=Homo sapiens GN=HSD17B10                            |            | 585.78 |
| Q99714;Q99714-2       | HCD2_HUMAN 3-hydroxyacyl-CoA dehydrogenase type-2 OS=Homo sapiens GN=HSD17B10 PE=1 SV=3;>sp Q99714-2 HCD2_HUMA        | 0          |        |
| Q99715;D6RGG3;Q99715  | COCA1_HUMAN Collagen alpha-1(XII) chain OS=Homo sapiens GN=COL12A1 PE=1 SV=2;>tr D6RGG3 D6RGG3_HUMAN Uncharacteri     | 0          |        |
| Q99719                | SEPT5_HUMAN Septin-5 OS=Homo sapiens GN=SEPT5 PE=1 SV=1                                                               |            | 94.84  |
| Q99720                | SGMR1_HUMAN Sigma non-opioid intracellular receptor 1 OS=Homo sapiens GN=SIGMAR1 PE=1 SV=1                            |            | 62.49  |
| Q99720-2              | SGMR1_HUMAN Isoform 2 of Sigma non-opioid intracellular receptor 1 OS=Homo sapiens GN=SIGMAR1                         |            | 3.59   |
| Q99720-3              | SGMR1_HUMAN Isoform 3 of Sigma non-opioid intracellular receptor 1 OS=Homo sapiens GN=SIGMAR1                         |            | 62.49  |
| Q99720-4              | SGMR1_HUMAN Isoform 4 of Sigma non-opioid intracellular receptor 1 OS=Homo sapiens GN=SIGMAR1                         |            | 58.9   |
| Q99720-5              | SGMR1_HUMAN Isoform 5 of Sigma non-opioid intracellular receptor 1 OS=Homo sapiens GN=SIGMAR1                         |            | 3.59   |
| Q99720;Q99720-2;Q9972 | SGMR1_HUMAN Sigma non-opioid intracellular receptor 1 OS=Homo sapiens GN=SIGMAR1 PE=1 SV=1;>sp Q99720-2 SGMR1_HUMA    | 1.21E-05   |        |
| Q99729                | ROAA_HUMAN Heterogeneous nuclear ribonucleoprotein A/B OS=Homo sapiens GN=HNRNPAB PE=1 SV=2                           |            | 296.14 |
| Q99729-2              | ROAA_HUMAN Isoform 2 of Heterogeneous nuclear ribonucleoprotein A/B OS=Homo sapiens GN=HNRNPAB                        |            | 390.3  |
| Q99729-2;Q99729-3;Q99 | 2 ROAA_HUMAN Isoform 2 of Heterogeneous nuclear ribonucleoprotein A/B OS=Homo sapiens GN=HNRNPAB;>sp Q99729-3 ROAA_H  | 8.72E-284  |        |
| Q99729-3              | ROAA_HUMAN Isoform 3 of Heterogeneous nuclear ribonucleoprotein A/B OS=Homo sapiens GN=HNRNPAB                        |            | 390.3  |
| Q99729-3;Q99729-2;Q99 | 3 ROAA_HUMAN Isoform 3 of Heterogeneous nuclear ribonucleoprotein A/B OS=Homo sapiens GN=HNRNPAB;>sp Q99729-2 ROAA_H  | 1.62E-141  |        |
| Q99729-4              | ROAA_HUMAN Isoform 4 of Heterogeneous nuclear ribonucleoprotein A/B OS=Homo sapiens GN=HNRNPAB                        |            | 296.14 |
| Q99733                | NP1L4_HUMAN Nucleosome assembly protein 1-like 4 OS=Homo sapiens GN=NAP1L4 PE=1 SV=1                                  |            | 104.97 |
| Q99742                | NPAS1_HUMAN Neuronal PAS domain-containing protein 1 OS=Homo sapiens GN=NPAS1 PE=2 SV=2                               |            |        |
| Q99747                | SNAG_HUMAN Gamma-soluble NSF attachment protein OS=Homo sapiens GN=NAPG PE=1 SV=1                                     |            | 51.24  |
| Q99755                | PI51A_HUMAN Phosphatidylinositol-4-phosphate 5-kinase type-1 alpha OS=Homo sapiens GN=PIP5K1A PE=1 SV=1               |            |        |
| Q99755-2              | PI51A_HUMAN Isoform 2 of Phosphatidylinositol-4-phosphate 5-kinase type-1 alpha OS=Homo sapiens GN=PIP5K1A            |            |        |
| Q99755-3              | PI51A_HUMAN Isoform 3 of Phosphatidylinositol-4-phosphate 5-kinase type-1 alpha OS=Homo sapiens GN=PIP5K1A            |            |        |

|                        |                                                                                                                      |           |        |
|------------------------|----------------------------------------------------------------------------------------------------------------------|-----------|--------|
| Q99766                 | ATP5S_HUMAN ATP synthase subunit s, mitochondrial OS=Homo sapiens GN=ATP5S PE=1 SV=3                                 | 7.65E-08  |        |
| Q99797                 | MIPEP_HUMAN Mitochondrial intermediate peptidase OS=Homo sapiens GN=MIPEP PE=1 SV=2                                  |           |        |
| Q99798                 | ACON_HUMAN Aconitate hydratase, mitochondrial OS=Homo sapiens GN=ACO2 PE=1 SV=2                                      |           | 261.63 |
| Q99805                 | TM9S2_HUMAN Transmembrane 9 superfamily member 2 OS=Homo sapiens GN=TM9SF2 PE=1 SV=1                                 |           | 140.69 |
| Q99807;Q49A71;Q8NI45;  | COQ7_HUMAN Ubiquinone biosynthesis protein COQ7 homolog OS=Homo sapiens GN=COQ7 PE=1 SV=3;>tr Q49A71 Q49A71_HUMA     | 4.78E-05  |        |
| Q99808                 | S29A1_HUMAN Equilibrative nucleoside transporter 1 OS=Homo sapiens GN=SLC29A1 PE=1 SV=3                              |           | 325.11 |
| Q99811                 | PRRX2_HUMAN Paired mesoderm homeobox protein 2 OS=Homo sapiens GN=PRRX2 PE=2 SV=2                                    |           |        |
| Q99816;Q99816-2        | TS101_HUMAN Tumor susceptibility gene 101 protein OS=Homo sapiens GN=TSG101 PE=1 SV=2;>sp Q99816-2 TS101_HUMAN Isofo | 6.38E-18  |        |
| Q99828                 | CIB1_HUMAN Calcium and integrin-binding protein 1 OS=Homo sapiens GN=CIB1 PE=1 SV=4                                  | 9.26E-14  |        |
| Q99829                 | CPNE1_HUMAN Copine-1 OS=Homo sapiens GN=CPNE1 PE=1 SV=1                                                              |           | 145.08 |
| Q99832                 | TCPH_HUMAN T-complex protein 1 subunit eta OS=Homo sapiens GN=CCT7 PE=1 SV=2                                         |           | 768.94 |
| Q99848                 | EBP2_HUMAN Probable rRNA-processing protein EBP2 OS=Homo sapiens GN=EBNA1BP2 PE=1 SV=2                               |           | 103.63 |
| Q99856                 | ARI3A_HUMAN AT-rich interactive domain-containing protein 3A OS=Homo sapiens GN=ARID3A PE=1 SV=2                     | 8.91E-11  |        |
| Q99865                 | SPI2A_HUMAN Spindlin-2A OS=Homo sapiens GN=SPIN2A PE=1 SV=3                                                          |           |        |
| Q99867                 | TBB4Q_HUMAN Putative tubulin beta-4q chain OS=Homo sapiens GN=TUBB4Q PE=5 SV=1                                       |           | 465.76 |
| Q99871-2;D3DWT9;Q99871 | HAUS7_HUMAN Isoform 2 of HAUS augmin-like complex subunit 7 OS=Homo sapiens GN=HAUS7;>tr D3DWT9 D3DWT9_HUMAN HI      | 1.11E-06  |        |
| Q99873                 | ANM1_HUMAN Protein arginine N-methyltransferase 1 OS=Homo sapiens GN=PRMT1 PE=1 SV=2                                 |           | 577.22 |
| Q99873-2               | ANM1_HUMAN Isoform 2 of Protein arginine N-methyltransferase 1 OS=Homo sapiens GN=PRMT1                              |           | 577.22 |
| Q99873-3               | ANM1_HUMAN Isoform 3 of Protein arginine N-methyltransferase 1 OS=Homo sapiens GN=PRMT1                              |           | 577.22 |
| Q99873;B4E3C3;Q8WUW5   | ANM1_HUMAN Protein arginine N-methyltransferase 1 OS=Homo sapiens GN=PRMT1 PE=1 SV=2;>tr B4E3C3 B4E3C3_HUMAN cDNA    | 4.61E-201 |        |
| Q99877                 | H2B1N_HUMAN Histone H2B type 1-N OS=Homo sapiens GN=HIST1H2BN PE=1 SV=3                                              |           | 705.85 |
| Q99878                 | H2A1J_HUMAN Histone H2A type 1-J OS=Homo sapiens GN=HIST1H2AJ PE=1 SV=3                                              |           | 288.83 |
| Q99879                 | H2B1M_HUMAN Histone H2B type 1-M OS=Homo sapiens GN=HIST1H2BM PE=1 SV=3                                              |           | 705.5  |
| Q99880                 | H2B1L_HUMAN Histone H2B type 1-L OS=Homo sapiens GN=HIST1H2BL PE=1 SV=3                                              |           | 707.99 |
| Q99943                 | PLCA_HUMAN 1-acyl-sn-glycerol-3-phosphate acyltransferase alpha OS=Homo sapiens GN=AGPAT1 PE=2 SV=2                  |           | 85.49  |
| Q99959;Q99959-2        | PKP2_HUMAN Plakophilin-2 OS=Homo sapiens GN=PKP2 PE=1 SV=2;>sp Q99959-2 PKP2_HUMAN Isoform 1 of Plakophilin-2 OS=Hor | 2.59E-06  |        |
| Q99961                 | SH3G1_HUMAN Endophilin-A2 OS=Homo sapiens GN=SH3GL1 PE=1 SV=1                                                        | 2.11E-78  |        |
| Q99983                 | OMD_HUMAN Osteomodulin OS=Homo sapiens GN=OMD PE=1 SV=1                                                              | 4.38E-05  |        |
| Q99986                 | VRK1_HUMAN Serine/threonine-protein kinase VRK1 OS=Homo sapiens GN=VRK1 PE=1 SV=1                                    |           | 174.6  |
| Q99996                 | AKAP9_HUMAN A-kinase anchor protein 9 OS=Homo sapiens GN=AKAP9 PE=1 SV=3                                             |           |        |
| Q99996-2               | AKAP9_HUMAN Isoform 2 of A-kinase anchor protein 9 OS=Homo sapiens GN=AKAP9                                          |           |        |
| Q99996-3               | AKAP9_HUMAN Isoform 3 of A-kinase anchor protein 9 OS=Homo sapiens GN=AKAP9                                          |           |        |
| Q99996-4               | AKAP9_HUMAN Isoform 4 of A-kinase anchor protein 9 OS=Homo sapiens GN=AKAP9                                          |           |        |
| Q99996-5               | AKAP9_HUMAN Isoform 5 of A-kinase anchor protein 9 OS=Homo sapiens GN=AKAP9                                          |           |        |
| Q99996-6               | AKAP9_HUMAN Isoform 6 of A-kinase anchor protein 9 OS=Homo sapiens GN=AKAP9                                          |           |        |
| Q99996-6;Q99996;Q99996 | AKAP9_HUMAN Isoform 6 of A-kinase anchor protein 9 OS=Homo sapiens GN=AKAP9;>sp Q99996 AKAP9_HUMAN A-kinase anchor   | 2.49E-12  |        |
| Q9BPW4                 | APOL4_HUMAN Apolipoprotein L4 OS=Homo sapiens GN=APOL4 PE=2 SV=3                                                     |           |        |
| Q9BPW4-2               | APOL4_HUMAN Isoform 2 of Apolipoprotein L4 OS=Homo sapiens GN=APOL4                                                  |           |        |
| Q9BPW4-3               | APOL4_HUMAN Isoform 3 of Apolipoprotein L4 OS=Homo sapiens GN=APOL4                                                  |           |        |
| Q9BPW8                 | NIPS1_HUMAN Protein NipSnap homolog 1 OS=Homo sapiens GN=NIPSNAP1 PE=1 SV=1                                          |           | 76.38  |
| Q9BPX3                 | CND3_HUMAN Condensin complex subunit 3 OS=Homo sapiens GN=NCAPG PE=1 SV=1                                            |           | 100.72 |
| Q9BPX5                 | ARP5L_HUMAN Actin-related protein 2/3 complex subunit 5-like protein OS=Homo sapiens GN=ARPC5L PE=1 SV=1             |           |        |
| Q9BPX6-3;Q9BPX6;Q9BPX6 | MICU1_HUMAN Isoform 3 of Calcium uptake protein 1, mitochondrial OS=Homo sapiens GN=MICU1;>sp Q9BPX6 MICU1_HUMAN C   | 2.18E-41  |        |
| Q9BPY3                 | F118B_HUMAN Protein FAM118B OS=Homo sapiens GN=FAM118B PE=1 SV=1                                                     | 1.66E-11  |        |
| Q9BPZ2                 | SPI2B_HUMAN Spindlin-2B OS=Homo sapiens GN=SPIN2B PE=2 SV=1                                                          |           |        |
| Q9BPZ3                 | PAIP2_HUMAN Polyadenylate-binding protein-interacting protein 2 OS=Homo sapiens GN=PAIP2 PE=1 SV=1                   | 1.16E-11  |        |
| Q9BPZ7;Q9BPZ7-2;Q9BPZ7 | SIN1_HUMAN Target of rapamycin complex 2 subunit MAPKAP1 OS=Homo sapiens GN=MAPKAP1 PE=1 SV=2;>sp Q9BPZ7-2 SIN1_HU   | 7.17E-09  |        |
| Q9BQ04                 | RBM4B_HUMAN RNA-binding protein 4B OS=Homo sapiens GN=RBM4B PE=1 SV=1                                                |           | 25.04  |
| Q9BQ15                 | SOSB1_HUMAN SOSS complex subunit B1 OS=Homo sapiens GN=OBFC2B PE=1 SV=1                                              |           | 39.42  |
| Q9BQ39                 | DDX50_HUMAN ATP-dependent RNA helicase DDX50 OS=Homo sapiens GN=DDX50 PE=1 SV=1                                      |           | 50.53  |
| Q9BQ48                 | RM34_HUMAN 39S ribosomal protein L34, mitochondrial OS=Homo sapiens GN=MRPL34 PE=1 SV=1                              |           |        |
| Q9BQ52                 | RN22_HUMAN Zinc phosphodiesterase ELAC protein 2 OS=Homo sapiens GN=ELAC2 PE=1 SV=2                                  |           |        |
| Q9BQ52-2               | RN22_HUMAN Isoform 2 of Zinc phosphodiesterase ELAC protein 2 OS=Homo sapiens GN=ELAC2                               |           |        |
| Q9BQ52-3               | RN22_HUMAN Isoform 3 of Zinc phosphodiesterase ELAC protein 2 OS=Homo sapiens GN=ELAC2                               |           |        |
| Q9BQ52;B4DT15;B4DPL9;  | RN22_HUMAN Zinc phosphodiesterase ELAC protein 2 OS=Homo sapiens GN=ELAC2 PE=1 SV=2;>tr B4DT15 B4DT15_HUMAN cDNA I   | 3.11E-50  |        |
| Q9BQ61                 | CS043_HUMAN Uncharacterized protein C19orf43 OS=Homo sapiens GN=C19orf43 PE=1 SV=1                                   |           |        |
| Q9BQ67                 | GRWD1_HUMAN Glutamate-rich WD repeat-containing protein 1 OS=Homo sapiens GN=GRWD1 PE=1 SV=1                         |           | 73.69  |
| Q9BQ69                 | MACD1_HUMAN MACRO domain-containing protein 1 OS=Homo sapiens GN=MACROD1 PE=1 SV=2                                   |           | 47.3   |
| Q9BQ70                 | TCF25_HUMAN Transcription factor 25 OS=Homo sapiens GN=TCF25 PE=1 SV=1                                               |           |        |
| Q9BQ75                 | CC026_HUMAN Uncharacterized protein C3orf26 OS=Homo sapiens GN=C3orf26 PE=1 SV=2                                     |           | 66.23  |
| Q9BQ87                 | TBL1Y_HUMAN F-box-like/WD repeat-containing protein TBL1Y OS=Homo sapiens GN=TBL1Y PE=2 SV=1                         |           | 22.51  |

|                       |                                                                                                                              |            |         |
|-----------------------|------------------------------------------------------------------------------------------------------------------------------|------------|---------|
| Q9BQ95;Q9BQ95-2       | ECSIT_HUMAN Evolutionarily conserved signaling intermediate in Toll pathway, mitochondrial OS=Homo sapiens GN=ECSIT PE=1 SV= | 4.70E-06   |         |
| Q9BQA1                | MEP50_HUMAN Methylosome protein 50 OS=Homo sapiens GN=WDR77 PE=1 SV=1                                                        |            |         |
| Q9BQB6                | VKOR1_HUMAN Vitamin K epoxide reductase complex subunit 1 OS=Homo sapiens GN=VKORC1 PE=1 SV=1                                |            | 29.99   |
| Q9BQB6-2              | VKOR1_HUMAN Isoform 2 of Vitamin K epoxide reductase complex subunit 1 OS=Homo sapiens GN=VKORC1                             |            | 29.99   |
| Q9BQC6                | RT63_HUMAN Ribosomal protein 63, mitochondrial OS=Homo sapiens GN=MRP63 PE=2 SV=1                                            |            | 85.76   |
| Q9BQD7                | F173A_HUMAN Protein FAM173A OS=Homo sapiens GN=FAM173A PE=2 SV=1                                                             |            | 23      |
| Q9BQE3                | TBA1C_HUMAN Tubulin alpha-1C chain OS=Homo sapiens GN=TUBA1C PE=1 SV=1                                                       |            | 1122.21 |
| Q9BQE4                | SELS_HUMAN Selenoprotein S OS=Homo sapiens GN=SELS PE=1 SV=3                                                                 |            | 33.13   |
| Q9BQE5                | APOL2_HUMAN Apolipoprotein L2 OS=Homo sapiens GN=APOL2 PE=1 SV=1                                                             | 5.23E-41   |         |
| Q9BQE9                | BCL7B_HUMAN B-cell CLL/lymphoma 7 protein family member B OS=Homo sapiens GN=BCL7B PE=1 SV=1                                 |            |         |
| Q9BQE9-3              | BCL7B_HUMAN Isoform 3 of B-cell CLL/lymphoma 7 protein family member B OS=Homo sapiens GN=BCL7B                              |            |         |
| Q9BQG0                | MBB1A_HUMAN Myb-binding protein 1A OS=Homo sapiens GN=MYBBP1A PE=1 SV=2                                                      |            | 961.07  |
| Q9BQG0-2              | MBB1A_HUMAN Isoform 2 of Myb-binding protein 1A OS=Homo sapiens GN=MYBBP1A                                                   |            | 961.07  |
| Q9BQG0-2;Q9BQG0       | 2 MBB1A_HUMAN Isoform 2 of Myb-binding protein 1A OS=Homo sapiens GN=MYBBP1A;>sp Q9BQG0 MBB1A_HUMAN Myb-binding p            | 6.12E-162  |         |
| Q9BQI0                | AIF1L_HUMAN Allograft inflammatory factor 1-like OS=Homo sapiens GN=AIF1L PE=1 SV=1                                          |            |         |
| Q9BQI0-2              | AIF1L_HUMAN Isoform 2 of Allograft inflammatory factor 1-like OS=Homo sapiens GN=AIF1L                                       |            |         |
| Q9BQI0-2;B7Z6K5;Q9BQI | 2 AIF1L_HUMAN Isoform 2 of Allograft inflammatory factor 1-like OS=Homo sapiens GN=AIF1L;>tr B7Z6K5 B7Z6K5_HUMAN cDNA FL     | 6.33E-09   |         |
| Q9BQI0-3              | AIF1L_HUMAN Isoform 3 of Allograft inflammatory factor 1-like OS=Homo sapiens GN=AIF1L                                       |            |         |
| Q9BQI0-4              | AIF1L_HUMAN Isoform 4 of Allograft inflammatory factor 1-like OS=Homo sapiens GN=AIF1L                                       |            |         |
| Q9BQL6;Q9BQL6-2;Q9BQI | FERM1_HUMAN Fermitin family homolog 1 OS=Homo sapiens GN=FERMT1 PE=1 SV=1;>sp Q9BQL6-2 FERM1_HUMAN Isoform 2 of Fe           | 1.94E-19   |         |
| Q9BQP7                | CT072_HUMAN Uncharacterized protein C20orf72 OS=Homo sapiens GN=C20orf72 PE=1 SV=1                                           | 1.40E-08   |         |
| Q9BQS8;Q9BQS8-2;Q9BQ  | FYCO1_HUMAN FYVE and coiled-coil domain-containing protein 1 OS=Homo sapiens GN=FYCO1 PE=1 SV=3;>sp Q9BQS8-2 FYCO1_H         | 1.67E-17   |         |
| Q9BR61                | ACBD6_HUMAN Acyl-CoA-binding domain-containing protein 6 OS=Homo sapiens GN=ACBD6 PE=1 SV=1                                  | 9.27E-82   |         |
| Q9BR76                | COR1B_HUMAN Coronin-1B OS=Homo sapiens GN=CORO1B PE=1 SV=1                                                                   |            | 92.55   |
| Q9BRA2                | TXD17_HUMAN Thioredoxin domain-containing protein 17 OS=Homo sapiens GN=TXNDC17 PE=1 SV=1                                    |            | 83.91   |
| Q9BRF8;Q9BRF8-2       | CPPED_HUMAN Calcineurin-like phosphoesterase domain-containing protein 1 OS=Homo sapiens GN=CPPED1 PE=1 SV=3;>sp Q9BRF       | 1.36E-46   |         |
| Q9BRG1                | VPS25_HUMAN Vacuolar protein-sorting-associated protein 25 OS=Homo sapiens GN=VPS25 PE=1 SV=1                                |            | 83.45   |
| Q9BRJ2                | RM45_HUMAN 39S ribosomal protein L45, mitochondrial OS=Homo sapiens GN=MRPL45 PE=1 SV=2                                      |            | 95.43   |
| Q9BRJ6                | CG050_HUMAN Uncharacterized protein C7orf50 OS=Homo sapiens GN=C7orf50 PE=1 SV=1                                             |            | 207.83  |
| Q9BRJ7                | SDOS_HUMAN Protein syndesmos OS=Homo sapiens GN=NUDT16L1 PE=1 SV=1                                                           |            | 72.55   |
| Q9BRJ7-2              | SDOS_HUMAN Isoform 2 of Protein syndesmos OS=Homo sapiens GN=NUDT16L1                                                        |            | 23.8    |
| Q9BRK5                | CAB45_HUMAN 45 kDa calcium-binding protein OS=Homo sapiens GN=SDF4 PE=1 SV=1                                                 |            |         |
| Q9BRK5-2              | CAB45_HUMAN Isoform 2 of 45 kDa calcium-binding protein OS=Homo sapiens GN=SDF4                                              |            |         |
| Q9BRK5-3              | CAB45_HUMAN Isoform 3 of 45 kDa calcium-binding protein OS=Homo sapiens GN=SDF4                                              |            |         |
| Q9BRK5-4              | CAB45_HUMAN Isoform 4 of 45 kDa calcium-binding protein OS=Homo sapiens GN=SDF4                                              |            |         |
| Q9BRK5-6              | CAB45_HUMAN Isoform 6 of 45 kDa calcium-binding protein OS=Homo sapiens GN=SDF4                                              |            |         |
| Q9BRL6                | SRSF8_HUMAN Serine/arginine-rich splicing factor 8 OS=Homo sapiens GN=SRSF8 PE=1 SV=1                                        |            | 69.11   |
| Q9BRL6-2              | SRSF8_HUMAN Isoform 2 of Serine/arginine-rich splicing factor 8 OS=Homo sapiens GN=SRSF8                                     |            | 69.11   |
| Q9BRL6;Q9BRL6-2;Q0113 | SRSF8_HUMAN Serine/arginine-rich splicing factor 8 OS=Homo sapiens GN=SRSF8 PE=1 SV=1;>sp Q9BRL6-2 SRSF8_HUMAN Isoform       | 0.00010645 |         |
| Q9BRN9                | TM2D3_HUMAN TM2 domain-containing protein 3 OS=Homo sapiens GN=TM2D3 PE=1 SV=2                                               |            |         |
| Q9BRN9-2              | TM2D3_HUMAN Isoform 2 of TM2 domain-containing protein 3 OS=Homo sapiens GN=TM2D3                                            |            |         |
| Q9BRP1                | PDD2L_HUMAN Programmed cell death protein 2-like OS=Homo sapiens GN=PDCC2L PE=1 SV=1                                         | 8.68E-06   |         |
| Q9BRP4                | PAAF1_HUMAN Proteasomal ATPase-associated factor 1 OS=Homo sapiens GN=PAAF1 PE=1 SV=2                                        |            |         |
| Q9BRP4-2              | PAAF1_HUMAN Isoform 2 of Proteasomal ATPase-associated factor 1 OS=Homo sapiens GN=PAAF1                                     |            |         |
| Q9BRP4;Q9BRP4-2       | PAAF1_HUMAN Proteasomal ATPase-associated factor 1 OS=Homo sapiens GN=PAAF1 PE=1 SV=2;>sp Q9BRP4-2 PAAF1_HUMAN Isof          | 2.31E-12   |         |
| Q9BRP8                | WIBG_HUMAN Partner of Y14 and mago OS=Homo sapiens GN=WIBG PE=1 SV=1                                                         |            | 114.33  |
| Q9BRP8-2              | WIBG_HUMAN Isoform 2 of Partner of Y14 and mago OS=Homo sapiens GN=WIBG                                                      |            | 114.33  |
| Q9BRP8;Q9BRP8-2       | WIBG_HUMAN Partner of Y14 and mago OS=Homo sapiens GN=WIBG PE=1 SV=1;>sp Q9BRP8-2 WIBG_HUMAN Isoform 2 of Partner            | 2.57E-140  |         |
| Q9BRQ8;C9JI05;Q9BRQ8- | AIFM2_HUMAN Apoptosis-inducing factor 2 OS=Homo sapiens GN=AIFM2 PE=2 SV=1;>tr C9JI05 C9JI05_HUMAN Uncharacterized prc       | 2.66E-17   |         |
| Q9BRR6                | ADPGK_HUMAN ADP-dependent glucokinase OS=Homo sapiens GN=ADPGK PE=1 SV=1                                                     |            |         |
| Q9BRR6-2              | ADPGK_HUMAN Isoform 2 of ADP-dependent glucokinase OS=Homo sapiens GN=ADPGK                                                  |            |         |
| Q9BRR6-3              | ADPGK_HUMAN Isoform 3 of ADP-dependent glucokinase OS=Homo sapiens GN=ADPGK                                                  |            |         |
| Q9BRR6-4              | ADPGK_HUMAN Isoform 4 of ADP-dependent glucokinase OS=Homo sapiens GN=ADPGK                                                  |            |         |
| Q9BRR6-5              | ADPGK_HUMAN Isoform 5 of ADP-dependent glucokinase OS=Homo sapiens GN=ADPGK                                                  |            |         |
| Q9BRR6;Q9BRR6-2;Q9BRI | ADPGK_HUMAN ADP-dependent glucokinase OS=Homo sapiens GN=ADPGK PE=1 SV=1;>sp Q9BRR6-2 ADPGK_HUMAN Isoform 2 of               | 2.24E-62   |         |
| Q9BRR8                | GPTC1_HUMAN G patch domain-containing protein 1 OS=Homo sapiens GN=GPATCH1 PE=1 SV=1                                         | 2.34E-08   |         |
| Q9BRS8                | LARP6_HUMAN La-related protein 6 OS=Homo sapiens GN=LARP6 PE=1 SV=1                                                          |            |         |
| Q9BRT2                | CF125_HUMAN Uncharacterized protein C6orf125 OS=Homo sapiens GN=C6orf125 PE=1 SV=1                                           |            | 26.19   |
| Q9BRT3                | CQ037_HUMAN Protein C17orf37 OS=Homo sapiens GN=C17orf37 PE=1 SV=1                                                           | 5.51E-07   |         |
| Q9BRT6                | LLPH_HUMAN Protein LLP homolog OS=Homo sapiens GN=LLPH PE=2 SV=1                                                             |            |         |
| Q9BRT9                | SLD5_HUMAN DNA replication complex GINS protein SLD5 OS=Homo sapiens GN=GINS4 PE=1 SV=1                                      | 8.36E-05   |         |

|                       |                                                                                                                      |           |        |
|-----------------------|----------------------------------------------------------------------------------------------------------------------|-----------|--------|
| Q9BRU9                | UTP23_HUMAN rRNA-processing protein UTP23 homolog OS=Homo sapiens GN=UTP23 PE=2 SV=2                                 |           |        |
| Q9BRV3                | SWET1_HUMAN Sugar transporter SWEET1 OS=Homo sapiens GN=SLC50A1 PE=2 SV=1                                            |           |        |
| Q9BRV3-2              | SWET1_HUMAN Isoform 2 of Sugar transporter SWEET1 OS=Homo sapiens GN=SLC50A1                                         |           |        |
| Q9BRV3-3              | SWET1_HUMAN Isoform 3 of Sugar transporter SWEET1 OS=Homo sapiens GN=SLC50A1                                         |           |        |
| Q9BRX2                | PELO_HUMAN Protein pelota homolog OS=Homo sapiens GN=PELO PE=1 SV=2                                                  |           |        |
| Q9BRX5                | PSF3_HUMAN DNA replication complex GINS protein PSF3 OS=Homo sapiens GN=GINS3 PE=1 SV=1                              | 1.77E-06  |        |
| Q9BRX8                | CJ058_HUMAN UPF0765 protein C10orf58 OS=Homo sapiens GN=C10orf58 PE=1 SV=3                                           |           | 212.22 |
| Q9BRZ2                | TRI56_HUMAN E3 ubiquitin-protein ligase TRIM56 OS=Homo sapiens GN=TRIM56 PE=1 SV=3                                   | 3.07E-12  |        |
| Q9BS26                | ERP44_HUMAN Endoplasmic reticulum resident protein 44 OS=Homo sapiens GN=ERP44 PE=1 SV=1                             |           | 391.52 |
| Q9BS40                | LXN_HUMAN Latexin OS=Homo sapiens GN=LXN PE=1 SV=2                                                                   | 5.07E-06  |        |
| Q9BS92                | NPS3B_HUMAN Protein NipSnap homolog 3B OS=Homo sapiens GN=NIPSNAP3B PE=2 SV=1                                        | 2.79E-11  |        |
| Q9BSC4                | NOL10_HUMAN Nucleolar protein 10 OS=Homo sapiens GN=NOL10 PE=1 SV=1                                                  |           | 25.92  |
| Q9BSC4-2              | NOL10_HUMAN Isoform 2 of Nucleolar protein 10 OS=Homo sapiens GN=NOL10                                               |           | 25.92  |
| Q9BSC4-3              | NOL10_HUMAN Isoform 3 of Nucleolar protein 10 OS=Homo sapiens GN=NOL10                                               |           |        |
| Q9BSD7                | NTPCR_HUMAN Cancer-related nucleoside-triphosphatase OS=Homo sapiens GN=NTPCR PE=1 SV=1                              |           | 142.82 |
| Q9BSH4                | TACO1_HUMAN Translational activator of cytochrome c oxidase 1 OS=Homo sapiens GN=TACO1 PE=1 SV=1                     |           | 86.38  |
| Q9BSH5                | HDHD3_HUMAN Haloacid dehalogenase-like hydrolase domain-containing protein 3 OS=Homo sapiens GN=HDHD3 PE=1 SV=1      |           |        |
| Q9BSJ2                | GCP2_HUMAN Gamma-tubulin complex component 2 OS=Homo sapiens GN=TUBGCP2 PE=1 SV=2                                    | 4.65E-10  |        |
| Q9BSJ8                | ESYT1_HUMAN Extended synaptotagmin-1 OS=Homo sapiens GN=ESYT1 PE=1 SV=1                                              |           | 817.6  |
| Q9BSJ8-2              | ESYT1_HUMAN Isoform 2 of Extended synaptotagmin-1 OS=Homo sapiens GN=ESYT1                                           |           | 817.6  |
| Q9BSJ8-2;Q9BSJ8       | 2 ESYT1_HUMAN Isoform 2 of Extended synaptotagmin-1 OS=Homo sapiens GN=ESYT1;>sp Q9BSJ8 ESYT1_HUMAN Extended synap   | 1.93E-84  |        |
| Q9BSJ8;Q9BSJ8-2       | ESYT1_HUMAN Extended synaptotagmin-1 OS=Homo sapiens GN=ESYT1 PE=1 SV=1;>sp Q9BSJ8-2 ESYT1_HUMAN Isoform 2 of Ext    | 3.44E-299 |        |
| Q9BSK2                | S2533_HUMAN Solute carrier family 25 member 33 OS=Homo sapiens GN=SLC25A33 PE=2 SV=1                                 |           |        |
| Q9BSR8                | YIPF4_HUMAN Protein YIPF4 OS=Homo sapiens GN=YIPF4 PE=1 SV=1                                                         |           |        |
| Q9BSU1                | CP070_HUMAN UPF0183 protein C16orf70 OS=Homo sapiens GN=C16orf70 PE=1 SV=1                                           | 2.99E-18  |        |
| Q9BSU3                | NAA11_HUMAN N-alpha-acetyltransferase 11, NatA catalytic subunit OS=Homo sapiens GN=NAA11 PE=1 SV=3                  |           | 12.31  |
| Q9BSV6                | SEN34_HUMAN tRNA-splicing endonuclease subunit Sen34 OS=Homo sapiens GN=TSEN34 PE=1 SV=1                             | 2.30E-08  |        |
| Q9BSW2                | EFC4B_HUMAN EF-hand calcium-binding domain-containing protein 4B OS=Homo sapiens GN=EFCAB4B PE=1 SV=1                |           |        |
| Q9BSW2-2              | EFC4B_HUMAN Isoform 2 of EF-hand calcium-binding domain-containing protein 4B OS=Homo sapiens GN=EFCAB4B             |           |        |
| Q9BSY4                | CHCH5_HUMAN Coiled-coil-helix-coiled-coil-helix domain-containing protein 5 OS=Homo sapiens GN=CHCH5 PE=2 SV=1       | 2.09E-09  |        |
| Q9BT09                | CNPY3_HUMAN Protein canopy homolog 3 OS=Homo sapiens GN=CNPY3 PE=1 SV=1                                              |           | 331.05 |
| Q9BT23                | LIMD2_HUMAN LIM domain-containing protein 2 OS=Homo sapiens GN=LIMD2 PE=1 SV=1                                       | 4.63E-08  |        |
| Q9BT73                | PSMG3_HUMAN Proteasome assembly chaperone 3 OS=Homo sapiens GN=PSMG3 PE=1 SV=1                                       |           | 19.59  |
| Q9BT78                | CSN4_HUMAN COP9 signalosome complex subunit 4 OS=Homo sapiens GN=COPS4 PE=1 SV=1                                     |           | 504.42 |
| Q9BT88                | SYT11_HUMAN Synaptotagmin-11 OS=Homo sapiens GN=SYT11 PE=1 SV=2                                                      |           |        |
| Q9BTC0                | DIDO1_HUMAN Death-inducer obliterator 1 OS=Homo sapiens GN=DIDO1 PE=1 SV=5                                           |           | 137.53 |
| Q9BTC0-1              | DIDO1_HUMAN Isoform 1 of Death-inducer obliterator 1 OS=Homo sapiens GN=DIDO1                                        |           | 129.12 |
| Q9BTC0-2              | DIDO1_HUMAN Isoform 2 of Death-inducer obliterator 1 OS=Homo sapiens GN=DIDO1                                        |           | 10.31  |
| Q9BTC0-3              | DIDO1_HUMAN Isoform 3 of Death-inducer obliterator 1 OS=Homo sapiens GN=DIDO1                                        |           | 10.31  |
| Q9BTC8                | MTA3_HUMAN Metastasis-associated protein MTA3 OS=Homo sapiens GN=MTA3 PE=1 SV=2                                      |           |        |
| Q9BTC8-2              | MTA3_HUMAN Isoform 2 of Metastasis-associated protein MTA3 OS=Homo sapiens GN=MTA3                                   |           |        |
| Q9BTD8                | RBM42_HUMAN RNA-binding protein 42 OS=Homo sapiens GN=RBM42 PE=1 SV=1                                                |           |        |
| Q9BTD8-2              | RBM42_HUMAN Isoform 2 of RNA-binding protein 42 OS=Homo sapiens GN=RBM42                                             |           |        |
| Q9BTD8-3              | RBM42_HUMAN Isoform 3 of RNA-binding protein 42 OS=Homo sapiens GN=RBM42                                             |           |        |
| Q9BTD8-4              | RBM42_HUMAN Isoform 4 of RNA-binding protein 42 OS=Homo sapiens GN=RBM42                                             |           |        |
| Q9BTD8;Q9BTD8-3;Q9BT  | RBM42_HUMAN RNA-binding protein 42 OS=Homo sapiens GN=RBM42 PE=1 SV=1;>sp Q9BTD8-3 RBM42_HUMAN Isoform 3 of RNA-     | 7.58E-48  |        |
| Q9BTE1                | DCTN5_HUMAN Dynactin subunit 5 OS=Homo sapiens GN=DCTN5 PE=1 SV=1                                                    | 9.83E-15  |        |
| Q9BTE3                | MCMBP_HUMAN Mini-chromosome maintenance complex-binding protein OS=Homo sapiens GN=MCMBP PE=1 SV=2                   |           | 7.45   |
| Q9BTE3-2              | MCMBP_HUMAN Isoform 2 of Mini-chromosome maintenance complex-binding protein OS=Homo sapiens GN=MCMBP                |           | 31.01  |
| Q9BTE3-2;Q9BTE3;B3KSP | 2 CJ119_HUMAN Isoform 2 of UPF0557 protein C10orf119 OS=Homo sapiens GN=C10orf119;>sp Q9BTE3 CJ119_HUMAN UPF0557 pr  | 4.33E-34  |        |
| Q9BTE3-2;Q9BTE3;Q9BTE | 2 MCMBP_HUMAN Isoform 2 of Mini-chromosome maintenance complex-binding protein OS=Homo sapiens GN=MCMBP;>sp Q9BTE3   | 8.07E-12  |        |
| Q9BTE3-3              | MCMBP_HUMAN Isoform 3 of Mini-chromosome maintenance complex-binding protein OS=Homo sapiens GN=MCMBP                |           | 23.56  |
| Q9BTE3;Q9BTE3-2;Q9BTE | MCMBP_HUMAN Mini-chromosome maintenance complex-binding protein OS=Homo sapiens GN=MCMBP PE=1 SV=2;>sp Q9BTE3-2 M    | 1.59E-11  |        |
| Q9BTE6-2;Q9BTE6       | 2 AASD1_HUMAN Isoform 2 of Alanyl-tRNA editing protein Aarsd1 OS=Homo sapiens GN=AARSD1;>sp Q9BTE6 AASD1_HUMAN Alany | 5.50E-11  |        |
| Q9BTE7                | DCNL5_HUMAN DCN1-like protein 5 OS=Homo sapiens GN=DCUN1D5 PE=1 SV=1                                                 |           | 100.76 |
| Q9BTF0                | THUM2_HUMAN THUMP domain-containing protein 2 OS=Homo sapiens GN=THUMPD2 PE=2 SV=2                                   |           |        |
| Q9BTF0-2              | THUM2_HUMAN Isoform 2 of THUMP domain-containing protein 2 OS=Homo sapiens GN=THUMPD2                                |           |        |
| Q9BTL3                | F103A_HUMAN Protein FAM103A1 OS=Homo sapiens GN=FAM103A1 PE=1 SV=1                                                   |           | 54.92  |
| Q9BTM1                | H2AJ_HUMAN Histone H2A.J OS=Homo sapiens GN=H2AFJ PE=1 SV=1                                                          |           | 288.83 |
| Q9BTM1-2              | H2AJ_HUMAN Isoform 2 of Histone H2A.J OS=Homo sapiens GN=H2AFJ                                                       |           | 221.88 |
| Q9BTP7                | FAP24_HUMAN Fanconi anemia-associated protein of 24 kDa OS=Homo sapiens GN=FAAP24 PE=1 SV=2                          |           |        |

|                       |                                                                                                                       |          |        |
|-----------------------|-----------------------------------------------------------------------------------------------------------------------|----------|--------|
| Q9BTT0                | AN32E_HUMAN Acidic leucine-rich nuclear phosphoprotein 32 family member E OS=Homo sapiens GN=ANP32E PE=1 SV=1         |          | 381.27 |
| Q9BTT4                | MED10_HUMAN Mediator of RNA polymerase II transcription subunit 10 OS=Homo sapiens GN=MED10 PE=1 SV=1                 |          |        |
| Q9BTT6                | LRRC1_HUMAN Leucine-rich repeat-containing protein 1 OS=Homo sapiens GN=LRRC1 PE=1 SV=1                               |          |        |
| Q9BTT6-2              | LRRC1_HUMAN Isoform 2 of Leucine-rich repeat-containing protein 1 OS=Homo sapiens GN=LRRC1                            |          |        |
| Q9BTU6                | P4K2A_HUMAN Phosphatidylinositol 4-kinase type 2-alpha OS=Homo sapiens GN=PI4K2A PE=1 SV=1                            |          | 82.73  |
| Q9BTV4                | TMM43_HUMAN Transmembrane protein 43 OS=Homo sapiens GN=TMEM43 PE=1 SV=1                                              |          | 286.66 |
| Q9BTW9-4;Q9BTW9;Q9BT  | 4 TBCD_HUMAN Isoform 4 of Tubulin-specific chaperone D OS=Homo sapiens GN=TBCD;>sp Q9BTW9 TBCD_HUMAN Tubulin-specific | 1.01E-16 |        |
| Q9BTZ2                | DHRS4_HUMAN Dehydrogenase/reductase SDR family member 4 OS=Homo sapiens GN=DHRS4 PE=1 SV=3                            |          | 43.71  |
| Q9BTZ2-2              | DHRS4_HUMAN Isoform 2 of Dehydrogenase/reductase SDR family member 4 OS=Homo sapiens GN=DHRS4                         |          |        |
| Q9BTZ2-3              | DHRS4_HUMAN Isoform 3 of Dehydrogenase/reductase SDR family member 4 OS=Homo sapiens GN=DHRS4                         |          |        |
| Q9BTZ2-4              | DHRS4_HUMAN Isoform 4 of Dehydrogenase/reductase SDR family member 4 OS=Homo sapiens GN=DHRS4                         |          | 43.71  |
| Q9BTZ2-5              | DHRS4_HUMAN Isoform 5 of Dehydrogenase/reductase SDR family member 4 OS=Homo sapiens GN=DHRS4                         |          |        |
| Q9BTZ2-7              | DHRS4_HUMAN Isoform 7 of Dehydrogenase/reductase SDR family member 4 OS=Homo sapiens GN=DHRS4                         |          |        |
| Q9BTZ2;Q9BTZ2-4;E2QRL | DHRS4_HUMAN Dehydrogenase/reductase SDR family member 4 OS=Homo sapiens GN=DHRS4 PE=1 SV=3;>sp Q9BTZ2-4 DHRS4_H       | 8.39E-09 |        |
| Q9BU02                | THTPA_HUMAN Thiamine-triphosphatase OS=Homo sapiens GN=THTPA PE=1 SV=3                                                | 1.93E-13 |        |
| Q9BU61                | NDUF3_HUMAN NADH dehydrogenase [ubiquinone] 1 alpha subcomplex assembly factor 3 OS=Homo sapiens GN=NDUFAF3 PE=1 SV=1 |          | 50.57  |
| Q9BU76                | MMTA2_HUMAN Multiple myeloma tumor-associated protein 2 OS=Homo sapiens GN=MMTAG2 PE=1 SV=1                           |          | 66.78  |
| Q9BU76-2              | MMTA2_HUMAN Isoform 2 of Multiple myeloma tumor-associated protein 2 OS=Homo sapiens GN=MMTAG2                        |          | 23.63  |
| Q9BU76-3              | MMTA2_HUMAN Isoform 3 of Multiple myeloma tumor-associated protein 2 OS=Homo sapiens GN=MMTAG2                        |          | 23.63  |
| Q9BU76-4              | MMTA2_HUMAN Isoform 4 of Multiple myeloma tumor-associated protein 2 OS=Homo sapiens GN=MMTAG2                        |          | 66.78  |
| Q9BU76;Q9BU76-4;Q9BU  | MMTA2_HUMAN Multiple myeloma tumor-associated protein 2 OS=Homo sapiens GN=MMTAG2 PE=1 SV=1;>sp Q9BU76-4 MMTA2_HU     | 5.48E-12 |        |
| Q9BU89                | DOHH_HUMAN Deoxyhypusine hydroxylase OS=Homo sapiens GN=DOHH PE=1 SV=1                                                | 7.73E-07 |        |
| Q9BUA3                | CK084_HUMAN Uncharacterized protein C11orf84 OS=Homo sapiens GN=C11orf84 PE=1 SV=3                                    | 6.08E-07 |        |
| Q9BUB7;Q9BUB7-2       | TMM70_HUMAN Transmembrane protein 70, mitochondrial OS=Homo sapiens GN=TMEM70 PE=1 SV=2;>sp Q9BUB7-2 TMM70_HUMA       | 2.82E-09 |        |
| Q9BUE0                | MED18_HUMAN Mediator of RNA polymerase II transcription subunit 18 OS=Homo sapiens GN=MED18 PE=1 SV=1                 |          |        |
| Q9BUF5                | TBB6_HUMAN Tubulin beta-6 chain OS=Homo sapiens GN=TUBB6 PE=1 SV=1                                                    |          | 952.4  |
| Q9BUH6                | CI142_HUMAN Uncharacterized protein C9orf142 OS=Homo sapiens GN=C9orf142 PE=1 SV=2                                    |          | 115.67 |
| Q9BUH8                | BEGIN_HUMAN Brain-enriched guanylate kinase-associated protein OS=Homo sapiens GN=BEGAIN PE=1 SV=1                    |          | 35.24  |
| Q9BUJ2                | HNRL1_HUMAN Heterogeneous nuclear ribonucleoprotein U-like protein 1 OS=Homo sapiens GN=HNRNPUL1 PE=1 SV=2            |          | 412.34 |
| Q9BUJ2-2              | HNRL1_HUMAN Isoform 2 of Heterogeneous nuclear ribonucleoprotein U-like protein 1 OS=Homo sapiens GN=HNRNPUL1         |          | 412.34 |
| Q9BUJ2-3              | HNRL1_HUMAN Isoform 3 of Heterogeneous nuclear ribonucleoprotein U-like protein 1 OS=Homo sapiens GN=HNRNPUL1         |          | 381.97 |
| Q9BUJ2-4              | HNRL1_HUMAN Isoform 4 of Heterogeneous nuclear ribonucleoprotein U-like protein 1 OS=Homo sapiens GN=HNRNPUL1         |          | 422.76 |
| Q9BUJ2;Q9BUJ2-2;B7Z4B | HNRL1_HUMAN Heterogeneous nuclear ribonucleoprotein U-like protein 1 OS=Homo sapiens GN=HNRNPUL1 PE=1 SV=2;>sp Q9BUJ2 | 0        |        |
| Q9BUK6                | MSTO1_HUMAN Protein misato homolog 1 OS=Homo sapiens GN=MSTO1 PE=1 SV=1                                               |          |        |
| Q9BUK6-2              | MSTO1_HUMAN Isoform 2 of Protein misato homolog 1 OS=Homo sapiens GN=MSTO1                                            |          |        |
| Q9BUK6-3              | MSTO1_HUMAN Isoform 3 of Protein misato homolog 1 OS=Homo sapiens GN=MSTO1                                            |          |        |
| Q9BUK6-4              | MSTO1_HUMAN Isoform 4 of Protein misato homolog 1 OS=Homo sapiens GN=MSTO1                                            |          |        |
| Q9BUK6-5              | MSTO1_HUMAN Isoform 5 of Protein misato homolog 1 OS=Homo sapiens GN=MSTO1                                            |          |        |
| Q9BUK6-6              | MSTO1_HUMAN Isoform 6 of Protein misato homolog 1 OS=Homo sapiens GN=MSTO1                                            |          |        |
| Q9BUK6-7              | MSTO1_HUMAN Isoform 7 of Protein misato homolog 1 OS=Homo sapiens GN=MSTO1                                            |          |        |
| Q9BUL8                | PDC10_HUMAN Programmed cell death protein 10 OS=Homo sapiens GN=PDCD10 PE=1 SV=1                                      |          | 155.57 |
| Q9BUL9                | RPP25_HUMAN Ribonuclease P protein subunit p25 OS=Homo sapiens GN=RPP25 PE=1 SV=1                                     |          | 29.9   |
| Q9BUN8                | DERL1_HUMAN Derlin-1 OS=Homo sapiens GN=DERL1 PE=1 SV=1                                                               |          | 53.53  |
| Q9BUN8-2              | DERL1_HUMAN Isoform 2 of Derlin-1 OS=Homo sapiens GN=DERL1                                                            |          | 53.53  |
| Q9BUN8;Q9BUN8-2       | DERL1_HUMAN Derlin-1 OS=Homo sapiens GN=DERL1 PE=1 SV=1;>sp Q9BUN8-2 DERL1_HUMAN Isoform 2 of Derlin-1 OS=Homo s      | 1.57E-65 |        |
| Q9BUP0                | EFHD1_HUMAN EF-hand domain-containing protein D1 OS=Homo sapiens GN=EFHD1 PE=1 SV=1                                   |          | 65.38  |
| Q9BUP3-3;D3DQY8;Q9BU  | 3 HTAI2_HUMAN Isoform 3 of Oxidoreductase HTATIP2 OS=Homo sapiens GN=HTATIP2;>tr D3DQY8 D3DQY8_HUMAN HIV-1 Tat inter  | 7.05E-16 |        |
| Q9BUQ8                | DDX23_HUMAN Probable ATP-dependent RNA helicase DDX23 OS=Homo sapiens GN=DDX23 PE=1 SV=3                              |          |        |
| Q9BUR4                | WAP53_HUMAN Telomerase Cajal body protein 1 OS=Homo sapiens GN=WRAP53 PE=1 SV=1                                       | 2.21E-10 |        |
| Q9BUR5                | APOO_HUMAN Apolipoprotein O OS=Homo sapiens GN=APOO PE=1 SV=1                                                         |          | 175.64 |
| Q9BUR5-2              | APOO_HUMAN Isoform 2 of Apolipoprotein O OS=Homo sapiens GN=APOO                                                      |          | 175.64 |
| Q9BUR5;Q9BUR5-2       | APOO_HUMAN Apolipoprotein O OS=Homo sapiens GN=APOO PE=1 SV=1;>sp Q9BUR5-2 APOO_HUMAN Isoform 2 of Apolipoprotein     | 1.01E-17 |        |
| Q9BUT1;A8K5M0;Q9BUT1  | BDH2_HUMAN 3-hydroxybutyrate dehydrogenase type 2 OS=Homo sapiens GN=BDH2 PE=1 SV=2;>tr A8K5M0 A8K5M0_HUMAN cDN       | 1.44E-49 |        |
| Q9BUW7                | CI016_HUMAN UPF0184 protein C9orf16 OS=Homo sapiens GN=C9orf16 PE=1 SV=1                                              |          | 27.92  |
| Q9BV19                | CA050_HUMAN Uncharacterized protein C1orf50 OS=Homo sapiens GN=C1orf50 PE=2 SV=2                                      | 1.31E-09 |        |
| Q9BV20;Q9BV20-2       | MTNA_HUMAN Methylthioribose-1-phosphate isomerase OS=Homo sapiens GN=MRI1 PE=1 SV=1;>sp Q9BV20-2 MTNA_HUMAN Isofo     | 4.88E-16 |        |
| Q9BV35                | SCMC3_HUMAN Calcium-binding mitochondrial carrier protein SCAmC-3 OS=Homo sapiens GN=SLC25A23 PE=1 SV=2               |          | 17.09  |
| Q9BV35-2              | SCMC3_HUMAN Isoform 2 of Calcium-binding mitochondrial carrier protein SCAmC-3 OS=Homo sapiens GN=SLC25A23            |          | 17.09  |
| Q9BV35-3              | SCMC3_HUMAN Isoform 3 of Calcium-binding mitochondrial carrier protein SCAmC-3 OS=Homo sapiens GN=SLC25A23            |          | 17.09  |
| Q9BV35-4              | SCMC3_HUMAN Isoform 4 of Calcium-binding mitochondrial carrier protein SCAmC-3 OS=Homo sapiens GN=SLC25A23            |          | 17.09  |
| Q9BV36;Q9BV36-2       | MELPH_HUMAN Melanophilin OS=Homo sapiens GN=MLPH PE=1 SV=1;>sp Q9BV36-2 MELPH_HUMAN Isoform 2 of Melanophilin OS=     | 3.51E-09 |        |



|                          |                                                                                                                        |          |         |
|--------------------------|------------------------------------------------------------------------------------------------------------------------|----------|---------|
| Q9BV38                   | WDR18_HUMAN WD repeat-containing protein 18 OS=Homo sapiens GN=WDR18 PE=1 SV=2                                         |          |         |
| Q9BV40                   | VAMP8_HUMAN Vesicle-associated membrane protein 8 OS=Homo sapiens GN=VAMP8 PE=1 SV=1                                   |          | 195.8   |
| Q9BV44                   | THUM3_HUMAN THUMP domain-containing protein 3 OS=Homo sapiens GN=THUMPD3 PE=1 SV=1                                     | 1.22E-06 |         |
| Q9BV57                   | MTND_HUMAN 1,2-dihydroxy-3-keto-5-methylthiopentene dioxygenase OS=Homo sapiens GN=ADI1 PE=1 SV=1                      |          | 44.55   |
| Q9BV57-2                 | MTND_HUMAN Isoform 2 of 1,2-dihydroxy-3-keto-5-methylthiopentene dioxygenase OS=Homo sapiens GN=ADI1                   |          | 10.7    |
| Q9BV57;Q9BV57-2          | MTND_HUMAN 1,2-dihydroxy-3-keto-5-methylthiopentene dioxygenase OS=Homo sapiens GN=ADI1 PE=1 SV=1;>sp Q9BV57-2 MTN     | 3.41E-30 |         |
| Q9BV73;Q9BV73-2          | CP250_HUMAN Centrosome-associated protein CEP250 OS=Homo sapiens GN=CEP250 PE=1 SV=2;>sp Q9BV73-2 CP250_HUMAN Isc      | 2.33E-22 |         |
| Q9BV79                   | MECR_HUMAN Trans-2-enoyl-CoA reductase, mitochondrial OS=Homo sapiens GN=MECR PE=1 SV=2                                | 9.82E-05 |         |
| Q9BV81                   | TMM93_HUMAN Transmembrane protein 93 OS=Homo sapiens GN=TMEM93 PE=1 SV=1                                               |          | 30.92   |
| Q9BV86                   | NTM1A_HUMAN Alpha N-terminal protein methyltransferase 1A OS=Homo sapiens GN=METTL11A PE=1 SV=3                        |          | 24.56   |
| Q9BV86-2                 | NTM1A_HUMAN Isoform 2 of Alpha N-terminal protein methyltransferase 1A OS=Homo sapiens GN=METTL11A                     |          | 24.17   |
| Q9BV86;Q9BV86-2          | NTM1A_HUMAN Alpha N-terminal protein methyltransferase 1A OS=Homo sapiens GN=METTL11A PE=1 SV=3;>sp Q9BV86-2 NTM1A_    | 2.23E-13 |         |
| Q9BVA1                   | TBB2B_HUMAN Tubulin beta-2B chain OS=Homo sapiens GN=TUBB2B PE=1 SV=1                                                  |          | 2168.12 |
| Q9BVC5                   | ASHWN_HUMAN Ashwin OS=Homo sapiens GN=C2orf49 PE=1 SV=1                                                                |          | 43.34   |
| Q9BVC6                   | TM109_HUMAN Transmembrane protein 109 OS=Homo sapiens GN=TMEM109 PE=1 SV=1                                             |          | 65.28   |
| Q9BVG4                   | CX026_HUMAN UPF0368 protein Cxorf26 OS=Homo sapiens GN=CXorf26 PE=1 SV=1                                               | 6.57E-36 |         |
| Q9BVG8;Q9BVG8-2          | KIFC3_HUMAN Kinesin-like protein KIFC3 OS=Homo sapiens GN=KIFC3 PE=1 SV=3;>sp Q9BVG8-2 KIFC3_HUMAN Isoform 2 of Kines  | 6.66E-06 |         |
| Q9BVI4                   | NOC4L_HUMAN Nucleolar complex protein 4 homolog OS=Homo sapiens GN=NOC4L PE=1 SV=1                                     |          |         |
| Q9BVJ6                   | UT14A_HUMAN U3 small nucleolar RNA-associated protein 14 homolog A OS=Homo sapiens GN=UTP14A PE=1 SV=1                 |          |         |
| Q9BVJ6-2                 | UT14A_HUMAN Isoform 2 of U3 small nucleolar RNA-associated protein 14 homolog A OS=Homo sapiens GN=UTP14A              |          |         |
| Q9BVJ6;Q5TAP6;Q9BVJ6-2   | UT14A_HUMAN U3 small nucleolar RNA-associated protein 14 homolog A OS=Homo sapiens GN=UTP14A PE=1 SV=1;>sp Q5TAP6 UT   | 2.21E-56 |         |
| Q9BVJ7                   | DUS23_HUMAN Dual specificity protein phosphatase 23 OS=Homo sapiens GN=DUSP23 PE=1 SV=1                                | 3.72E-06 |         |
| Q9BVK6                   | TMED9_HUMAN Transmembrane emp24 domain-containing protein 9 OS=Homo sapiens GN=TMED9 PE=1 SV=2                         |          | 518.59  |
| Q9BVL2                   | NUPL1_HUMAN Nucleoporin p58/p45 OS=Homo sapiens GN=NUPL1 PE=1 SV=1                                                     |          |         |
| Q9BVL2-2                 | NUPL1_HUMAN Isoform 2 of Nucleoporin p58/p45 OS=Homo sapiens GN=NUPL1                                                  |          |         |
| Q9BVL2;Q9BVL2-2          | NUPL1_HUMAN Nucleoporin p58/p45 OS=Homo sapiens GN=NUPL1 PE=1 SV=1;>sp Q9BVL2-2 NUPL1_HUMAN Isoform 2 of Nucleopo      | 1.99E-09 |         |
| Q9BVP2                   | GNL3_HUMAN Guanine nucleotide-binding protein-like 3 OS=Homo sapiens GN=GNL3 PE=1 SV=2                                 |          | 180.13  |
| Q9BVP2-2                 | GNL3_HUMAN Isoform 2 of Guanine nucleotide-binding protein-like 3 OS=Homo sapiens GN=GNL3                              |          | 180.13  |
| Q9BVP2;Q9BVP2-2          | GNL3_HUMAN Guanine nucleotide-binding protein-like 3 OS=Homo sapiens GN=GNL3 PE=1 SV=2;>sp Q9BVP2-2 GNL3_HUMAN Isofo   | 5.17E-43 |         |
| Q9BVQ7                   | SPA5L_HUMAN Spermatogenesis-associated protein 5-like protein 1 OS=Homo sapiens GN=SPATA5L1 PE=1 SV=2                  |          |         |
| Q9BVQ7-2                 | SPA5L_HUMAN Isoform 2 of Spermatogenesis-associated protein 5-like protein 1 OS=Homo sapiens GN=SPATA5L1               |          |         |
| Q9BVQ7-3                 | SPA5L_HUMAN Isoform 3 of Spermatogenesis-associated protein 5-like protein 1 OS=Homo sapiens GN=SPATA5L1               |          |         |
| Q9BVQ7;Q9BVQ7-2          | SPA5L_HUMAN Spermatogenesis-associated protein 5-like protein 1 OS=Homo sapiens GN=SPATA5L1 PE=1 SV=2;>sp Q9BVQ7-2 SP/ | 8.86E-07 |         |
| Q9BVT8                   | TMUB1_HUMAN Transmembrane and ubiquitin-like domain-containing protein 1 OS=Homo sapiens GN=TMUB1 PE=1 SV=1            |          | 112.51  |
| Q9BVV7                   | TI21L_HUMAN TIM21-like protein, mitochondrial OS=Homo sapiens GN=C18orf55 PE=1 SV=1                                    |          | 16.98   |
| Q9BW04;Q9BW04-2          | SARG_HUMAN Specifically androgen-regulated gene protein OS=Homo sapiens GN=SARG PE=1 SV=2;>sp Q9BW04-2 SARG_HUMAN      | 1.07E-14 |         |
| Q9BW19                   | KIFC1_HUMAN Kinesin-like protein KIFC1 OS=Homo sapiens GN=KIFC1 PE=1 SV=2                                              |          | 61.76   |
| Q9BW27                   | NUP85_HUMAN Nuclear pore complex protein Nup85 OS=Homo sapiens GN=NUP85 PE=1 SV=1                                      | 1.28E-31 |         |
| Q9BW30                   | TPPP3_HUMAN Tubulin polymerization-promoting protein family member 3 OS=Homo sapiens GN=TPPP3 PE=1 SV=1                | 3.15E-09 |         |
| Q9BW60                   | ELOV1_HUMAN Elongation of very long chain fatty acids protein 1 OS=Homo sapiens GN=ELOVL1 PE=1 SV=1                    |          | 77.34   |
| Q9BW61                   | DDA1_HUMAN DET1- and DDB1-associated protein 1 OS=Homo sapiens GN=DDA1 PE=1 SV=1                                       |          | 31.59   |
| Q9BW71                   | HIRP3_HUMAN HIRA-interacting protein 3 OS=Homo sapiens GN=HIRIP3 PE=1 SV=3                                             |          |         |
| Q9BW71-2                 | HIRP3_HUMAN Isoform 2 of HIRA-interacting protein 3 OS=Homo sapiens GN=HIRIP3                                          |          |         |
| Q9BW83                   | IFT27_HUMAN Intraflagellar transport protein 27 homolog OS=Homo sapiens GN=IFT27 PE=1 SV=1                             |          |         |
| Q9BW83-2                 | IFT27_HUMAN Isoform 2 of Intraflagellar transport protein 27 homolog OS=Homo sapiens GN=IFT27                          |          |         |
| Q9BW83;Q9BW83-2          | IFT27_HUMAN Intraflagellar transport protein 27 homolog OS=Homo sapiens GN=IFT27 PE=1 SV=1;>sp Q9BW83-2 IFT27_HUMAN Ie | 5.21E-06 |         |
| Q9BW91;Q9BW91-2          | NUDT9_HUMAN ADP-ribose pyrophosphatase, mitochondrial OS=Homo sapiens GN=NUDT9 PE=1 SV=1;>sp Q9BW91-2 NUDT9_HUM/       | 2.30E-35 |         |
| Q9BW92                   | SYTM_HUMAN Threonyl-tRNA synthetase, mitochondrial OS=Homo sapiens GN=TARS2 PE=1 SV=1                                  | 8.63E-30 |         |
| Q9BWD1                   | THIC_HUMAN Acetyl-CoA acetyltransferase, cytosolic OS=Homo sapiens GN=ACAT2 PE=1 SV=2                                  |          | 68.03   |
| Q9BWE0                   | REPI1_HUMAN Replication initiator 1 OS=Homo sapiens GN=REPIN1 PE=1 SV=1                                                | 5.28E-29 |         |
| Q9BWF3                   | RBM4_HUMAN RNA-binding protein 4 OS=Homo sapiens GN=RBM4 PE=1 SV=1                                                     |          | 27.01   |
| Q9BWF3-2                 | RBM4_HUMAN Isoform 2 of RNA-binding protein 4 OS=Homo sapiens GN=RBM4                                                  |          | 25.04   |
| Q9BWF3-3                 | RBM4_HUMAN Isoform 3 of RNA-binding protein 4 OS=Homo sapiens GN=RBM4                                                  |          | 25.04   |
| Q9BWF3;Q9BQ04;Q9BWF3-2   | RBM4_HUMAN RNA-binding protein 4 OS=Homo sapiens GN=RBM4 PE=1 SV=1;>sp Q9BQ04 RBM4B_HUMAN RNA-binding protein 4B       | 9.75E-10 |         |
| Q9BWH2                   | FUND2_HUMAN FUN14 domain-containing protein 2 OS=Homo sapiens GN=FUNDC2 PE=1 SV=2                                      |          |         |
| Q9BWH6;Q9BWH6-2          | RPAP1_HUMAN RNA polymerase II-associated protein 1 OS=Homo sapiens GN=RPAP1 PE=1 SV=3;>sp Q9BWH6-2 RPAP1_HUMAN Isc     | 9.47E-05 |         |
| Q9BWJ5                   | SF3B5_HUMAN Splicing factor 3B subunit 5 OS=Homo sapiens GN=SF3B5 PE=1 SV=1                                            |          | 205.85  |
| Q9BWM7                   | SFXN3_HUMAN Sideroflexin-3 OS=Homo sapiens GN=SFXN3 PE=2 SV=2                                                          |          | 176.12  |
| Q9BWS9                   | CHID1_HUMAN Chitinase domain-containing protein 1 OS=Homo sapiens GN=CHID1 PE=1 SV=1                                   |          | 102.41  |
| Q9BWS9-2                 | CHID1_HUMAN Isoform 2 of Chitinase domain-containing protein 1 OS=Homo sapiens GN=CHID1                                |          | 88.33   |
| Q9BWS9-2;Q9BWS9;Q9BWS9-2 | CHID1_HUMAN Isoform 2 of Chitinase domain-containing protein 1 OS=Homo sapiens GN=CHID1;>sp Q9BWS9 CHID1_HUMAN Chi     | 2.97E-22 |         |

|                       |                                                                                                                        |           |        |
|-----------------------|------------------------------------------------------------------------------------------------------------------------|-----------|--------|
| Q9BWS9-3              | CHID1_HUMAN Isoform 3 of Chitinase domain-containing protein 1 OS=Homo sapiens GN=CHID1                                |           | 102.41 |
| Q9BWT6                | MND1_HUMAN Meiotic nuclear division protein 1 homolog OS=Homo sapiens GN=MND1 PE=1 SV=1                                |           | 59.14  |
| Q9BWU0                | NADAP_HUMAN Kanadaplin OS=Homo sapiens GN=SLC4A1AP PE=1 SV=1                                                           |           | 66.02  |
| Q9BWV7                | TLL2_HUMAN Probable tubulin polyglutamylase TLL2 OS=Homo sapiens GN=TLL2 PE=5 SV=3                                     |           |        |
| Q9BX40                | LS14B_HUMAN Protein LSM14 homolog B OS=Homo sapiens GN=LSM14B PE=1 SV=1                                                |           |        |
| Q9BX40-2              | LS14B_HUMAN Isoform 2 of Protein LSM14 homolog B OS=Homo sapiens GN=LSM14B                                             |           |        |
| Q9BX40;Q9BX40-2       | LS14B_HUMAN Protein LSM14 homolog B OS=Homo sapiens GN=LSM14B PE=1 SV=1;>sp Q9BX40-2 LS14B_HUMAN Isoform 2 of Prc      | 5.68E-12  |        |
| Q9BX63                | FANCI_HUMAN Fanconi anemia group J protein OS=Homo sapiens GN=BRIP1 PE=1 SV=1                                          |           | 18.19  |
| Q9BX63-2              | FANCI_HUMAN Isoform 2 of Fanconi anemia group J protein OS=Homo sapiens GN=BRIP1                                       |           | 23.08  |
| Q9BX66-10             | SRBS1_HUMAN Isoform 10 of Sorbin and SH3 domain-containing protein 1 OS=Homo sapiens GN=SORBS1                         |           |        |
| Q9BX66-12             | SRBS1_HUMAN Isoform 12 of Sorbin and SH3 domain-containing protein 1 OS=Homo sapiens GN=SORBS1                         |           |        |
| Q9BX66-4              | SRBS1_HUMAN Isoform 4 of Sorbin and SH3 domain-containing protein 1 OS=Homo sapiens GN=SORBS1                          |           |        |
| Q9BX66-5              | SRBS1_HUMAN Isoform 5 of Sorbin and SH3 domain-containing protein 1 OS=Homo sapiens GN=SORBS1                          |           |        |
| Q9BX66-6              | SRBS1_HUMAN Isoform 6 of Sorbin and SH3 domain-containing protein 1 OS=Homo sapiens GN=SORBS1                          |           |        |
| Q9BX66-8              | SRBS1_HUMAN Isoform 8 of Sorbin and SH3 domain-containing protein 1 OS=Homo sapiens GN=SORBS1                          |           |        |
| Q9BX66-9              | SRBS1_HUMAN Isoform 9 of Sorbin and SH3 domain-containing protein 1 OS=Homo sapiens GN=SORBS1                          |           |        |
| Q9BX68                | HINT2_HUMAN Histidine triad nucleotide-binding protein 2, mitochondrial OS=Homo sapiens GN=HINT2 PE=1 SV=1             |           | 343.68 |
| Q9BX97                | PLVAP_HUMAN Plasmalemma vesicle-associated protein OS=Homo sapiens GN=PLVAP PE=2 SV=1                                  |           | 30.06  |
| Q9BXB5                | OSB10_HUMAN Oxysterol-binding protein-related protein 10 OS=Homo sapiens GN=OSBPL10 PE=1 SV=2                          | 2.87E-09  |        |
| Q9BXD5;Q9BXD5-2;Q9BX  | NPL_HUMAN N-acetylneuraminylase OS=Homo sapiens GN=NPL PE=2 SV=1;>sp Q9BXD5-2 NPL_HUMAN Isoform 2 of N-acetylne        | 2.93E-41  |        |
| Q9BXF6                | RFIP5_HUMAN Rab11 family-interacting protein 5 OS=Homo sapiens GN=RAB11FIP5 PE=1 SV=1                                  |           | 331.06 |
| Q9BXI6                | TB10A_HUMAN TBC1 domain family member 10A OS=Homo sapiens GN=TBC1D10A PE=1 SV=1                                        |           | 43.43  |
| Q9BXJ9                | NAA15_HUMAN N-alpha-acetyltransferase 15, NatA auxiliary subunit OS=Homo sapiens GN=NAA15 PE=1 SV=1                    |           | 78.54  |
| Q9BXJ9-4              | NAA15_HUMAN Isoform 2 of N-alpha-acetyltransferase 15, NatA auxiliary subunit OS=Homo sapiens GN=NAA15                 |           | 78.54  |
| Q9BXJ9;Q9BXJ9-4       | NAA15_HUMAN N-alpha-acetyltransferase 15, NatA auxiliary subunit OS=Homo sapiens GN=NAA15 PE=1 SV=1;>sp Q9BXJ9-4 NAA15 | 3.38E-109 |        |
| Q9BXX5;Q9BXX5-2       | B2L13_HUMAN Bcl-2-like protein 13 OS=Homo sapiens GN=BCL2L13 PE=1 SV=1;>sp Q9BXX5-2 B2L13_HUMAN Isoform 1 of Bcl-2-lil | 1.00E-05  |        |
| Q9BXL6                | CARD14_HUMAN Caspase recruitment domain-containing protein 14 OS=Homo sapiens GN=CARD14 PE=1 SV=2                      |           | 30.59  |
| Q9BXL8                | CDCA4_HUMAN Cell division cycle-associated protein 4 OS=Homo sapiens GN=CDCA4 PE=2 SV=1                                |           | 34.09  |
| Q9BXM0                | PRAX_HUMAN Periaxin OS=Homo sapiens GN=PRX PE=1 SV=2                                                                   |           |        |
| Q9BXM0-3              | PRAX_HUMAN Isoform 3 of Periaxin OS=Homo sapiens GN=PRX                                                                |           |        |
| Q9BXN1                | ASPN_HUMAN Asporin OS=Homo sapiens GN=ASPN PE=1 SV=2                                                                   | 4.72E-263 |        |
| Q9BXP2                | S12A9_HUMAN Solute carrier family 12 member 9 OS=Homo sapiens GN=SLC12A9 PE=1 SV=1                                     | 1.91E-05  |        |
| Q9BXP5                | SRRT_HUMAN Serrate RNA effector molecule homolog OS=Homo sapiens GN=SRRT PE=1 SV=1                                     |           | 337.15 |
| Q9BXP5-2              | SRRT_HUMAN Isoform 2 of Serrate RNA effector molecule homolog OS=Homo sapiens GN=SRRT                                  |           | 337.15 |
| Q9BXP5-3              | SRRT_HUMAN Isoform 3 of Serrate RNA effector molecule homolog OS=Homo sapiens GN=SRRT                                  |           | 337.15 |
| Q9BXP5-4              | SRRT_HUMAN Isoform 4 of Serrate RNA effector molecule homolog OS=Homo sapiens GN=SRRT                                  |           | 337.15 |
| Q9BXP5-5              | SRRT_HUMAN Isoform 5 of Serrate RNA effector molecule homolog OS=Homo sapiens GN=SRRT                                  |           | 337.15 |
| Q9BXP5;Q9BXP5-3;Q9BXP | SRRT_HUMAN Serrate RNA effector molecule homolog OS=Homo sapiens GN=SRRT PE=1 SV=1;>sp Q9BXP5-3 SRRT_HUMAN Isoform     | 2.49E-147 |        |
| Q9BXP8                | PAPP2_HUMAN Pappalysin-2 OS=Homo sapiens GN=PAPPA2 PE=1 SV=4                                                           |           | 23.8   |
| Q9BXP8-2              | PAPP2_HUMAN Isoform 2 of Pappalysin-2 OS=Homo sapiens GN=PAPPA2                                                        |           | 23.8   |
| Q9BXR0                | TGT_HUMAN Queuine tRNA-ribosyltransferase OS=Homo sapiens GN=QTRT1 PE=1 SV=3                                           | 4.94E-14  |        |
| Q9BXR5                | TLR10_HUMAN Toll-like receptor 10 OS=Homo sapiens GN=TLR10 PE=1 SV=2                                                   |           | 35.32  |
| Q9BXS5                | AP1M1_HUMAN AP-1 complex subunit mu-1 OS=Homo sapiens GN=AP1M1 PE=1 SV=3                                               |           | 21.93  |
| Q9BXT4                | TDRD1_HUMAN Tudor domain-containing protein 1 OS=Homo sapiens GN=TDRD1 PE=1 SV=2                                       |           |        |
| Q9BXT4-2              | TDRD1_HUMAN Isoform 2 of Tudor domain-containing protein 1 OS=Homo sapiens GN=TDRD1                                    |           |        |
| Q9BXT4-3              | TDRD1_HUMAN Isoform 3 of Tudor domain-containing protein 1 OS=Homo sapiens GN=TDRD1                                    |           |        |
| Q9BXT5                | TEX15_HUMAN Testis-expressed sequence 15 protein OS=Homo sapiens GN=TEX15 PE=1 SV=2                                    |           |        |
| Q9BXT8                | RNF17_HUMAN RING finger protein 17 OS=Homo sapiens GN=RNF17 PE=1 SV=3                                                  |           |        |
| Q9BXT8-1              | RNF17_HUMAN Isoform 2 of RING finger protein 17 OS=Homo sapiens GN=RNF17                                               |           |        |
| Q9BXT8-4              | RNF17_HUMAN Isoform 4 of RING finger protein 17 OS=Homo sapiens GN=RNF17                                               |           |        |
| Q9BXT8-5              | RNF17_HUMAN Isoform 5 of RING finger protein 17 OS=Homo sapiens GN=RNF17                                               |           |        |
| Q9BXU9                | CABP8_HUMAN Calcium-binding protein 8 OS=Homo sapiens GN=CALN1 PE=2 SV=1                                               |           | 19.23  |
| Q9BXV9                | CN142_HUMAN Uncharacterized protein C14orf142 OS=Homo sapiens GN=C14orf142 PE=2 SV=2                                   |           | 21.27  |
| Q9BXW6                | OSBL1_HUMAN Oxysterol-binding protein-related protein 1 OS=Homo sapiens GN=OSBPL1A PE=1 SV=2                           |           |        |
| Q9BXW6-2              | OSBL1_HUMAN Isoform A of Oxysterol-binding protein-related protein 1 OS=Homo sapiens GN=OSBPL1A                        |           |        |
| Q9BXW6-3              | OSBL1_HUMAN Isoform C of Oxysterol-binding protein-related protein 1 OS=Homo sapiens GN=OSBPL1A                        |           |        |
| Q9BXW7                | CECR5_HUMAN Cat eye syndrome critical region protein 5 OS=Homo sapiens GN=CECR5 PE=1 SV=1                              |           |        |
| Q9BXW7-2              | CECR5_HUMAN Isoform 1 of Cat eye syndrome critical region protein 5 OS=Homo sapiens GN=CECR5                           |           |        |
| Q9BXW7;Q9BXW7-2       | CECR5_HUMAN Cat eye syndrome critical region protein 5 OS=Homo sapiens GN=CECR5 PE=1 SV=1;>sp Q9BXW7-2 CECR5_HUMAN     | 2.26E-32  |        |
| Q9BXW9                | FANCD2_HUMAN Fanconi anemia group D2 protein OS=Homo sapiens GN=FANCD2 PE=1 SV=1                                       |           |        |
| Q9BXW9-2              | FANCD2_HUMAN Isoform 2 of Fanconi anemia group D2 protein OS=Homo sapiens GN=FANCD2                                    |           |        |

|                          |                                                                                                                                                                                                                                   |            |        |
|--------------------------|-----------------------------------------------------------------------------------------------------------------------------------------------------------------------------------------------------------------------------------|------------|--------|
| Q9BXW9-3                 | FACD2_HUMAN Isoform 3 of Fanconi anemia group D2 protein OS=Homo sapiens GN=FANCD2                                                                                                                                                |            |        |
| Q9BXW9-4                 | FACD2_HUMAN Isoform 4 of Fanconi anemia group D2 protein OS=Homo sapiens GN=FANCD2                                                                                                                                                |            |        |
| Q9BXW9;Q9BXW9-2;Q9BXW9-3 | FACD2_HUMAN Fanconi anemia group D2 protein OS=Homo sapiens GN=FANCD2 PE=1 SV=1;>sp Q9BXW9-2 FACD2_HUMAN Isoform 3 of Fanconi anemia group D2 protein OS=Homo sapiens GN=FANCD2                                                   | 1.08E-14   |        |
| Q9BXX2                   | ANK30B_HUMAN Ankyrin repeat domain-containing protein 30B OS=Homo sapiens GN=ANKRD30B PE=2 SV=2                                                                                                                                   |            |        |
| Q9BXX2-2                 | ANK30B_HUMAN Isoform 2 of Ankyrin repeat domain-containing protein 30B OS=Homo sapiens GN=ANKRD30B                                                                                                                                |            |        |
| Q9BXX2-3                 | ANK30B_HUMAN Isoform 3 of Ankyrin repeat domain-containing protein 30B OS=Homo sapiens GN=ANKRD30B                                                                                                                                |            |        |
| Q9BXX3                   | ANK30A_HUMAN Ankyrin repeat domain-containing protein 30A OS=Homo sapiens GN=ANKRD30A PE=1 SV=3                                                                                                                                   |            |        |
| Q9BXY0                   | MAK16_HUMAN Protein MAK16 homolog OS=Homo sapiens GN=MAK16 PE=1 SV=2                                                                                                                                                              |            |        |
| Q9BY11                   | PACN1_HUMAN Protein kinase C and casein kinase substrate in neurons protein 1 OS=Homo sapiens GN=PACN1 PE=1 SV=1                                                                                                                  |            |        |
| Q9BY32                   | ITPA_HUMAN Inosine triphosphate pyrophosphatase OS=Homo sapiens GN=ITPA PE=1 SV=2                                                                                                                                                 |            | 52.07  |
| Q9BY42                   | CT043_HUMAN UPF0549 protein C20orf43 OS=Homo sapiens GN=C20orf43 PE=1 SV=3                                                                                                                                                        |            |        |
| Q9BY43                   | CHM4A_HUMAN Charged multivesicular body protein 4a OS=Homo sapiens GN=CHMP4A PE=1 SV=3                                                                                                                                            | 1.10E-15   |        |
| Q9BY44                   | EIF2A_HUMAN Eukaryotic translation initiation factor 2A OS=Homo sapiens GN=EIF2A PE=1 SV=3                                                                                                                                        |            | 235.25 |
| Q9BY44-2                 | EIF2A_HUMAN Isoform 2 of Eukaryotic translation initiation factor 2A OS=Homo sapiens GN=EIF2A                                                                                                                                     |            | 147.24 |
| Q9BY50                   | SC11C_HUMAN Signal peptidase complex catalytic subunit SEC11C OS=Homo sapiens GN=SEC11C PE=1 SV=3                                                                                                                                 | 1.67E-18   |        |
| Q9BY66                   | KDM5D_HUMAN Lysine-specific demethylase 5D OS=Homo sapiens GN=KDM5D PE=1 SV=2                                                                                                                                                     |            | 28.1   |
| Q9BY66-2                 | KDM5D_HUMAN Isoform 2 of Lysine-specific demethylase 5D OS=Homo sapiens GN=KDM5D                                                                                                                                                  |            | 28.1   |
| Q9BY77                   | PDIP3_HUMAN Polymerase delta-interacting protein 3 OS=Homo sapiens GN=POLDIP3 PE=1 SV=2                                                                                                                                           |            | 76.12  |
| Q9BY77-2                 | PDIP3_HUMAN Isoform 2 of Polymerase delta-interacting protein 3 OS=Homo sapiens GN=POLDIP3                                                                                                                                        |            | 57.06  |
| Q9BY77;Q9BY77-2          | PDIP3_HUMAN Polymerase delta-interacting protein 3 OS=Homo sapiens GN=POLDIP3 PE=1 SV=2;>sp Q9BY77-2 PDIP3_HUMAN Isoform 2 of Polymerase delta-interacting protein 3 OS=Homo sapiens GN=POLDIP3                                   | 1.40E-11   |        |
| Q9BYC5;Q9BYC5-2          | FUT8_HUMAN Alpha-(1,6)-fucosyltransferase OS=Homo sapiens GN=FUT8 PE=1 SV=2;>sp Q9BYC5-2 FUT8_HUMAN Isoform 2 of Alpha-(1,6)-fucosyltransferase OS=Homo sapiens GN=FUT8                                                           | 4.88E-06   |        |
| Q9BYC8                   | RM32_HUMAN 39S ribosomal protein L32, mitochondrial OS=Homo sapiens GN=MRPL32 PE=1 SV=1                                                                                                                                           | 5.76E-08   |        |
| Q9BYC9                   | RM20_HUMAN 39S ribosomal protein L20, mitochondrial OS=Homo sapiens GN=MRPL20 PE=1 SV=1                                                                                                                                           |            | 46.07  |
| Q9BYD1                   | RM13_HUMAN 39S ribosomal protein L13, mitochondrial OS=Homo sapiens GN=MRPL13 PE=1 SV=1                                                                                                                                           |            | 113.28 |
| Q9BYD2                   | RM09_HUMAN 39S ribosomal protein L9, mitochondrial OS=Homo sapiens GN=MRPL9 PE=1 SV=2                                                                                                                                             |            | 114.48 |
| Q9BYD3                   | RM04_HUMAN 39S ribosomal protein L4, mitochondrial OS=Homo sapiens GN=MRPL4 PE=1 SV=1                                                                                                                                             |            | 113.88 |
| Q9BYD3-2                 | RM04_HUMAN Isoform 2 of 39S ribosomal protein L4, mitochondrial OS=Homo sapiens GN=MRPL4                                                                                                                                          |            | 113.88 |
| Q9BYD3;Q9BYD3-2          | RM04_HUMAN 39S ribosomal protein L4, mitochondrial OS=Homo sapiens GN=MRPL4 PE=1 SV=1;>sp Q9BYD3-2 RM04_HUMAN Isoform 2 of 39S ribosomal protein L4, mitochondrial OS=Homo sapiens GN=MRPL4                                       | 8.99E-09   |        |
| Q9BYD6                   | RM01_HUMAN 39S ribosomal protein L1, mitochondrial OS=Homo sapiens GN=MRPL1 PE=1 SV=2                                                                                                                                             |            | 207.22 |
| Q9BYE4                   | SPR2G_HUMAN Small proline-rich protein 2G OS=Homo sapiens GN=SPRR2G PE=2 SV=1                                                                                                                                                     |            | 23.4   |
| Q9BYF1                   | ACE2_HUMAN Angiotensin-converting enzyme 2 OS=Homo sapiens GN=ACE2 PE=1 SV=2                                                                                                                                                      |            | 23.28  |
| Q9BYG3                   | MK67I_HUMAN MKI67 FHA domain-interacting nucleolar phosphoprotein OS=Homo sapiens GN=MKI67IP PE=1 SV=1                                                                                                                            |            | 71.68  |
| Q9BYG4                   | PAR6G_HUMAN Partitioning defective 6 homolog gamma OS=Homo sapiens GN=PAR6G PE=1 SV=1                                                                                                                                             | 0.00011439 |        |
| Q9BYJ4                   | TRI34_HUMAN Tripartite motif-containing protein 34 OS=Homo sapiens GN=TRIM34 PE=1 SV=2                                                                                                                                            |            | 28.93  |
| Q9BYJ4-2                 | TRI34_HUMAN Isoform 2 of Tripartite motif-containing protein 34 OS=Homo sapiens GN=TRIM34                                                                                                                                         |            | 28.93  |
| Q9BYJ9                   | YTHD1_HUMAN YTH domain family protein 1 OS=Homo sapiens GN=YTHDF1 PE=1 SV=1                                                                                                                                                       |            | 59.35  |
| Q9BYK8                   | PR285_HUMAN Peroxisomal proliferator-activated receptor A-interacting complex 285 kDa protein OS=Homo sapiens GN=PRIC285 PE=1 SV=6                                                                                                |            | 131.22 |
| Q9BYK8-2                 | PR285_HUMAN Isoform 2 of Peroxisomal proliferator-activated receptor A-interacting complex 285 kDa protein OS=Homo sapiens GN=PRIC285                                                                                             |            | 125.75 |
| Q9BYK8-4                 | PR285_HUMAN Isoform 3 of Peroxisomal proliferator-activated receptor A-interacting complex 285 kDa protein OS=Homo sapiens GN=PRIC285                                                                                             |            | 125.75 |
| Q9BYN0                   | SRXN1_HUMAN Sulfiredoxin-1 OS=Homo sapiens GN=SRXN1 PE=1 SV=2                                                                                                                                                                     | 6.23E-10   |        |
| Q9BYN8                   | RT26_HUMAN 28S ribosomal protein S26, mitochondrial OS=Homo sapiens GN=MRPS26 PE=1 SV=1                                                                                                                                           |            | 36.06  |
| Q9BYP7                   | WNK3_HUMAN Serine/threonine-protein kinase WNK3 OS=Homo sapiens GN=WNK3 PE=1 SV=2                                                                                                                                                 |            |        |
| Q9BYP7-2                 | WNK3_HUMAN Isoform 2 of Serine/threonine-protein kinase WNK3 OS=Homo sapiens GN=WNK3                                                                                                                                              |            |        |
| Q9BYT8                   | NEUL_HUMAN Neurolysin, mitochondrial OS=Homo sapiens GN=NLN PE=1 SV=1                                                                                                                                                             |            | 15.07  |
| Q9BYV8;Q9BYV8-2;Q9BYV8-3 | CEP41_HUMAN Centrosomal protein of 41 kDa OS=Homo sapiens GN=TSGA14 PE=1 SV=1;>sp Q9BYV8-2 CEP41_HUMAN Isoform 2 of Centrosomal protein of 41 kDa OS=Homo sapiens GN=TSGA14                                                       | 8.70E-19   |        |
| Q9BYX2;Q9BYX2-2;Q9BYX2-3 | TBD2A_HUMAN TBC1 domain family member 2A OS=Homo sapiens GN=TBC1D2 PE=1 SV=3;>sp Q9BYX2-2 TBD2A_HUMAN Isoform 2 of TBC1 domain family member 2A OS=Homo sapiens GN=TBC1D2                                                         | 7.64E-13   |        |
| Q9BYX4;Q9BYX4-2          | IFIH1_HUMAN Interferon-induced helicase C domain-containing protein 1 OS=Homo sapiens GN=IFIH1 PE=1 SV=3;>sp Q9BYX4-2 IFIH1_HUMAN Isoform 2 of Interferon-induced helicase C domain-containing protein 1 OS=Homo sapiens GN=IFIH1 | 7.54E-07   |        |
| Q9BYX7                   | ACTBM_HUMAN Putative beta-actin-like protein 3 OS=Homo sapiens GN=POTEKP PE=5 SV=1                                                                                                                                                |            | 343.95 |
| Q9BYZ2                   | LDH6B_HUMAN L-lactate dehydrogenase A-like 6B OS=Homo sapiens GN=LDHAL6B PE=1 SV=3                                                                                                                                                |            | 123.7  |
| Q9BZ23                   | PANK2_HUMAN Pantothenate kinase 2, mitochondrial OS=Homo sapiens GN=PANK2 PE=1 SV=3                                                                                                                                               |            | 19.79  |
| Q9BZ23-3                 | PANK2_HUMAN Isoform 2 of Pantothenate kinase 2, mitochondrial OS=Homo sapiens GN=PANK2                                                                                                                                            |            | 2.34   |
| Q9BZ23-4                 | PANK2_HUMAN Isoform 4 of Pantothenate kinase 2, mitochondrial OS=Homo sapiens GN=PANK2                                                                                                                                            |            | 19.79  |
| Q9BZ29                   | DOCK9_HUMAN Dedicator of cytokinesis protein 9 OS=Homo sapiens GN=DOCK9 PE=1 SV=2                                                                                                                                                 |            |        |
| Q9BZ29-3                 | DOCK9_HUMAN Isoform 3 of Dedicator of cytokinesis protein 9 OS=Homo sapiens GN=DOCK9                                                                                                                                              |            |        |
| Q9BZ29-4                 | DOCK9_HUMAN Isoform 4 of Dedicator of cytokinesis protein 9 OS=Homo sapiens GN=DOCK9                                                                                                                                              |            |        |
| Q9BZ29-4;Q9BZ29;Q9BZ29-3 | DOCK9_HUMAN Isoform 4 of Dedicator of cytokinesis protein 9 OS=Homo sapiens GN=DOCK9;>sp Q9BZ29 DOCK9_HUMAN Dedicator of cytokinesis protein 9 OS=Homo sapiens GN=DOCK9                                                           | 1.11E-10   |        |
| Q9BZ29-5                 | DOCK9_HUMAN Isoform 2 of Dedicator of cytokinesis protein 9 OS=Homo sapiens GN=DOCK9                                                                                                                                              |            |        |
| Q9BZ67                   | FRMD8_HUMAN FERM domain-containing protein 8 OS=Homo sapiens GN=FRMD8 PE=1 SV=1                                                                                                                                                   |            |        |
| Q9BZ67-2                 | FRMD8_HUMAN Isoform 2 of FERM domain-containing protein 8 OS=Homo sapiens GN=FRMD8                                                                                                                                                |            |        |
| Q9BZ72                   | PITM2_HUMAN Membrane-associated phosphatidylinositol transfer protein 2 OS=Homo sapiens GN=PITPM2 PE=1 SV=1                                                                                                                       |            | 77.34  |
| Q9BZ72-2                 | PITM2_HUMAN Isoform 2 of Membrane-associated phosphatidylinositol transfer protein 2 OS=Homo sapiens GN=PITPM2                                                                                                                    |            | 77.34  |

|                         |                                                                                                                            |           |        |
|-------------------------|----------------------------------------------------------------------------------------------------------------------------|-----------|--------|
| Q9BZ72-3                | PITM2_HUMAN Isoform 3 of Membrane-associated phosphatidylinositol transfer protein 2 OS=Homo sapiens GN=PITPM2             |           | 26.27  |
| Q9BZA7                  | PC11X_HUMAN Protocadherin-11 X-linked OS=Homo sapiens GN=PCDH11X PE=2 SV=1                                                 |           |        |
| Q9BZA7-2                | PC11X_HUMAN Isoform 2 of Protocadherin-11 X-linked OS=Homo sapiens GN=PCDH11X                                              |           |        |
| Q9BZA7-3                | PC11X_HUMAN Isoform 3 of Protocadherin-11 X-linked OS=Homo sapiens GN=PCDH11X                                              |           |        |
| Q9BZA7-4                | PC11X_HUMAN Isoform 4 of Protocadherin-11 X-linked OS=Homo sapiens GN=PCDH11X                                              |           |        |
| Q9BZA7-5                | PC11X_HUMAN Isoform 5 of Protocadherin-11 X-linked OS=Homo sapiens GN=PCDH11X                                              |           |        |
| Q9BZA7-6                | PC11X_HUMAN Isoform 6 of Protocadherin-11 X-linked OS=Homo sapiens GN=PCDH11X                                              |           |        |
| Q9BZA7-7                | PC11X_HUMAN Isoform 7 of Protocadherin-11 X-linked OS=Homo sapiens GN=PCDH11X                                              |           |        |
| Q9BZA7-8                | PC11X_HUMAN Isoform 8 of Protocadherin-11 X-linked OS=Homo sapiens GN=PCDH11X                                              |           |        |
| Q9BZA8                  | PC11Y_HUMAN Protocadherin-11 Y-linked OS=Homo sapiens GN=PCDH11Y PE=1 SV=1                                                 |           |        |
| Q9BZA8-2                | PC11Y_HUMAN Isoform 2 of Protocadherin-11 Y-linked OS=Homo sapiens GN=PCDH11Y                                              |           |        |
| Q9BZA8-3                | PC11Y_HUMAN Isoform 3 of Protocadherin-11 Y-linked OS=Homo sapiens GN=PCDH11Y                                              |           |        |
| Q9BZA8-4                | PC11Y_HUMAN Isoform 4 of Protocadherin-11 Y-linked OS=Homo sapiens GN=PCDH11Y                                              |           |        |
| Q9BZC1                  | CELF4_HUMAN CUGBP Elav-like family member 4 OS=Homo sapiens GN=CELF4 PE=1 SV=1                                             |           |        |
| Q9BZC1-2                | CELF4_HUMAN Isoform 2 of CUGBP Elav-like family member 4 OS=Homo sapiens GN=CELF4                                          |           |        |
| Q9BZC1-3                | CELF4_HUMAN Isoform 3 of CUGBP Elav-like family member 4 OS=Homo sapiens GN=CELF4                                          |           |        |
| Q9BZC1-4                | CELF4_HUMAN Isoform 4 of CUGBP Elav-like family member 4 OS=Homo sapiens GN=CELF4                                          |           |        |
| Q9BZC1-5                | CELF4_HUMAN Isoform 5 of CUGBP Elav-like family member 4 OS=Homo sapiens GN=CELF4                                          |           |        |
| Q9BZD4                  | NUF2_HUMAN Kinetochore protein Nuf2 OS=Homo sapiens GN=NUF2 PE=1 SV=2                                                      |           |        |
| Q9BZE0                  | GLIS2_HUMAN Zinc finger protein GLIS2 OS=Homo sapiens GN=GLIS2 PE=1 SV=2                                                   |           |        |
| Q9BZE1                  | RM37_HUMAN 39S ribosomal protein L37, mitochondrial OS=Homo sapiens GN=MRPL37 PE=1 SV=2                                    |           | 21.83  |
| Q9BZE4                  | NOG1_HUMAN Nucleolar GTP-binding protein 1 OS=Homo sapiens GN=GTPBP4 PE=1 SV=3                                             |           | 171.58 |
| Q9BZF1                  | OSBL8_HUMAN Oxysterol-binding protein-related protein 8 OS=Homo sapiens GN=OSBPL8 PE=1 SV=3                                |           | 105.32 |
| Q9BZF1-2                | OSBL8_HUMAN Isoform 2 of Oxysterol-binding protein-related protein 8 OS=Homo sapiens GN=OSBPL8                             |           | 105.32 |
| Q9BZF1;Q9BZF1-2         | OSBL8_HUMAN Oxysterol-binding protein-related protein 8 OS=Homo sapiens GN=OSBPL8 PE=1 SV=3;>sp Q9BZF1-2 OSBL8_HUMAN       | 2.32E-26  |        |
| Q9BZF2                  | OSBL7_HUMAN Oxysterol-binding protein-related protein 7 OS=Homo sapiens GN=OSBPL7 PE=2 SV=1                                |           |        |
| Q9BZF9                  | UACA_HUMAN Uveal autoantigen with coiled-coil domains and ankyrin repeats OS=Homo sapiens GN=UACA PE=1 SV=2                |           | 77.82  |
| Q9BZG1                  | RAB34_HUMAN Ras-related protein Rab-34 OS=Homo sapiens GN=RAB34 PE=1 SV=1                                                  |           | 362.38 |
| Q9BZG1-2                | RAB34_HUMAN Isoform 2 of Ras-related protein Rab-34 OS=Homo sapiens GN=RAB34                                               |           | 287.26 |
| Q9BZG1;Q9BZG1-2         | RAB34_HUMAN Ras-related protein Rab-34 OS=Homo sapiens GN=RAB34 PE=1 SV=1;>sp Q9BZG1-2 RAB34_HUMAN Isoform 2 of Ra         | 2.01E-27  |        |
| Q9BZH6                  | WDR11_HUMAN WD repeat-containing protein 11 OS=Homo sapiens GN=WDR11 PE=1 SV=1                                             |           |        |
| Q9BZJ0                  | CRNL1_HUMAN Crooked neck-like protein 1 OS=Homo sapiens GN=CRNKL1 PE=1 SV=4                                                |           |        |
| Q9BZJ0-2                | CRNL1_HUMAN Isoform 2 of Crooked neck-like protein 1 OS=Homo sapiens GN=CRNKL1                                             |           |        |
| Q9BZJ0-3                | CRNL1_HUMAN Isoform 3 of Crooked neck-like protein 1 OS=Homo sapiens GN=CRNKL1                                             |           |        |
| Q9BZJ0-4                | CRNL1_HUMAN Isoform 4 of Crooked neck-like protein 1 OS=Homo sapiens GN=CRNKL1                                             |           |        |
| Q9BZJ0-5                | CRNL1_HUMAN Isoform 5 of Crooked neck-like protein 1 OS=Homo sapiens GN=CRNKL1                                             |           |        |
| Q9BZJ0;Q9BZJ0-3;Q9BZJ1  | CRNL1_HUMAN Crooked neck-like protein 1 OS=Homo sapiens GN=CRNKL1 PE=1 SV=4;>sp Q9BZJ0-3 CRNL1_HUMAN Isoform 3 of C        | 8.70E-21  |        |
| Q9BZK3                  | NACP1_HUMAN Putative nascent polypeptide-associated complex subunit alpha-like protein OS=Homo sapiens GN=NACAP1 PE=5 SV=1 |           | 182.22 |
| Q9BZK7                  | TBL1R_HUMAN F-box-like/WD repeat-containing protein TBL1XR1 OS=Homo sapiens GN=TBL1XR1 PE=1 SV=1                           | 1.89E-29  |        |
| Q9BZL1                  | UBL5_HUMAN Ubiquitin-like protein 5 OS=Homo sapiens GN=UBL5 PE=1 SV=1                                                      |           | 79.51  |
| Q9BZL4                  | PP12C_HUMAN Protein phosphatase 1 regulatory subunit 12C OS=Homo sapiens GN=PPP1R12C PE=1 SV=1                             |           | 67.27  |
| Q9BZL4-2                | PP12C_HUMAN Isoform 2 of Protein phosphatase 1 regulatory subunit 12C OS=Homo sapiens GN=PPP1R12C                          |           | 23.8   |
| Q9BZL4-3                | PP12C_HUMAN Isoform 3 of Protein phosphatase 1 regulatory subunit 12C OS=Homo sapiens GN=PPP1R12C                          |           | 67.27  |
| Q9BZL4-4                | PP12C_HUMAN Isoform 4 of Protein phosphatase 1 regulatory subunit 12C OS=Homo sapiens GN=PPP1R12C                          |           | 67.27  |
| Q9BZL6                  | KPCD2_HUMAN Serine/threonine-protein kinase D2 OS=Homo sapiens GN=PRKD2 PE=1 SV=2                                          |           |        |
| Q9BZM5                  | N2DL2_HUMAN NKG2D ligand 2 OS=Homo sapiens GN=ULBP2 PE=1 SV=1                                                              |           |        |
| Q9BZQ8                  | NIBAN_HUMAN Protein Niban OS=Homo sapiens GN=FAM129A PE=1 SV=1                                                             | 6.80E-22  |        |
| Q9BZV1;Q9BZV1-2         | UBXN6_HUMAN UBX domain-containing protein 6 OS=Homo sapiens GN=UBXN6 PE=1 SV=1;>sp Q9BZV1-2 UBXN6_HUMAN Isoform            | 5.41E-20  |        |
| Q9BZX2;B4DGD3;Q9BZX2    | UCK2_HUMAN Uridine-cytidine kinase 2 OS=Homo sapiens GN=UCK2 PE=1 SV=1;>tr B4DGD3 B4DGD3_HUMAN Uridine kinase OS=H         | 6.57E-08  |        |
| Q9BZZ2                  | SN_HUMAN Sialoadhesin OS=Homo sapiens GN=SIGLEC1 PE=1 SV=2                                                                 |           | 23.47  |
| Q9BZZ2-2                | SN_HUMAN Isoform 2 of Sialoadhesin OS=Homo sapiens GN=SIGLEC1                                                              |           | 23.47  |
| Q9BZZ2-3                | SN_HUMAN Isoform 3 of Sialoadhesin OS=Homo sapiens GN=SIGLEC1                                                              |           | 23.47  |
| Q9BZZ2;Q9BZZ2-3;A5D8    | SN_HUMAN Sialoadhesin OS=Homo sapiens GN=SIGLEC1 PE=1 SV=2;>sp Q9BZZ2-3 SN_HUMAN Isoform 3 of Sialoadhesin OS=Hom          | 2.47E-38  |        |
| Q9BZZ5                  | API5_HUMAN Apoptosis inhibitor 5 OS=Homo sapiens GN=API5 PE=1 SV=2                                                         |           | 314.32 |
| Q9BZZ5-2                | API5_HUMAN Isoform 2 of Apoptosis inhibitor 5 OS=Homo sapiens GN=API5                                                      |           | 314.32 |
| Q9BZZ5-2;Q9BZZ5-4;Q9BZ2 | API5_HUMAN Isoform 2 of Apoptosis inhibitor 5 OS=Homo sapiens GN=API5;>sp Q9BZZ5-4 API5_HUMAN Isoform 4 of Apoptosis in    | 7.91E-162 |        |
| Q9BZZ5-3                | API5_HUMAN Isoform 3 of Apoptosis inhibitor 5 OS=Homo sapiens GN=API5                                                      |           | 284.95 |
| Q9BZZ5-4                | API5_HUMAN Isoform 4 of Apoptosis inhibitor 5 OS=Homo sapiens GN=API5                                                      |           | 314.32 |
| Q9BZZ5;Q9BZZ5-2;Q9BZ2   | API5_HUMAN Apoptosis inhibitor 5 OS=Homo sapiens GN=API5 PE=1 SV=2;>sp Q9BZZ5-2 API5_HUMAN Isoform 2 of Apoptosis inhit    | 6.88E-86  |        |
| Q9C002                  | NMES1_HUMAN Normal mucosa of esophagus-specific gene 1 protein OS=Homo sapiens GN=NMES1 PE=2 SV=1                          |           | 80.94  |
| Q9C005                  | DPY30_HUMAN Protein dpy-30 homolog OS=Homo sapiens GN=DPY30 PE=1 SV=1                                                      |           |        |

|                        |                                                                                                                       |          |       |
|------------------------|-----------------------------------------------------------------------------------------------------------------------|----------|-------|
| Q9C035-5               | TRIM5_HUMAN Isoform Epsilon of Tripartite motif-containing protein 5 OS=Homo sapiens GN=TRIM5                         |          |       |
| Q9C037                 | TRIM4_HUMAN Tripartite motif-containing protein 4 OS=Homo sapiens GN=TRIM4 PE=2 SV=2                                  |          | 75.06 |
| Q9C037-2               | TRIM4_HUMAN Isoform Beta of Tripartite motif-containing protein 4 OS=Homo sapiens GN=TRIM4                            |          | 55.14 |
| Q9C037-3               | TRIM4_HUMAN Isoform Gamma of Tripartite motif-containing protein 4 OS=Homo sapiens GN=TRIM4                           |          | 48.63 |
| Q9C075                 | K1C23_HUMAN Keratin, type I cytoskeletal 23 OS=Homo sapiens GN=KRT23 PE=1 SV=2                                        |          |       |
| Q9C091                 | GRB1L_HUMAN GREB1-like protein OS=Homo sapiens GN=GREB1L PE=2 SV=2                                                    |          | 55.66 |
| Q9C091-2               | GRB1L_HUMAN Isoform 2 of GREB1-like protein OS=Homo sapiens GN=GREB1L                                                 |          | 28.93 |
| Q9C091-3               | GRB1L_HUMAN Isoform 3 of GREB1-like protein OS=Homo sapiens GN=GREB1L                                                 |          | 32.88 |
| Q9C091-4               | GRB1L_HUMAN Isoform 4 of GREB1-like protein OS=Homo sapiens GN=GREB1L                                                 |          | 28.93 |
| Q9C091-5               | GRB1L_HUMAN Isoform 5 of GREB1-like protein OS=Homo sapiens GN=GREB1L                                                 |          | 28.93 |
| Q9C093                 | SPEF2_HUMAN Sperm flagellar protein 2 OS=Homo sapiens GN=SPEF2 PE=1 SV=2                                              |          |       |
| Q9C093-2               | SPEF2_HUMAN Isoform 2 of Sperm flagellar protein 2 OS=Homo sapiens GN=SPEF2                                           |          |       |
| Q9C093-3               | SPEF2_HUMAN Isoform 3 of Sperm flagellar protein 2 OS=Homo sapiens GN=SPEF2                                           |          |       |
| Q9C093;Q9C093-2;D6REZ  | SPEF2_HUMAN Sperm flagellar protein 2 OS=Homo sapiens GN=SPEF2 PE=1 SV=2;>sp Q9C093-2 SPEF2_HUMAN Isoform 2 of Sperrn | 4.48E-06 |       |
| Q9C098                 | DCLK3_HUMAN Serine/threonine-protein kinase DCLK3 OS=Homo sapiens GN=DCLK3 PE=1 SV=2                                  |          | 10.89 |
| Q9C099                 | LRCC1_HUMAN Leucine-rich repeat and coiled-coil domain-containing protein 1 OS=Homo sapiens GN=LRCC1 PE=2 SV=2        |          |       |
| Q9C099-2               | LRCC1_HUMAN Isoform 2 of Leucine-rich repeat and coiled-coil domain-containing protein 1 OS=Homo sapiens GN=LRCC1     |          |       |
| Q9C0A0                 | CNTP4_HUMAN Contactin-associated protein-like 4 OS=Homo sapiens GN=CNTP4 PE=1 SV=3                                    |          |       |
| Q9C0B1                 | FTO_HUMAN Alpha-ketoglutarate-dependent dioxygenase FTO OS=Homo sapiens GN=FTO PE=1 SV=3                              | 4.13E-05 |       |
| Q9C0C2                 | TB182_HUMAN 182 kDa tankyrase-1-binding protein OS=Homo sapiens GN=TNKS1BP1 PE=1 SV=4                                 |          | 71.93 |
| Q9C0C9                 | UBE2O_HUMAN Ubiquitin-conjugating enzyme E2 O OS=Homo sapiens GN=UBE2O PE=1 SV=3                                      |          |       |
| Q9C0D2                 | K1731_HUMAN Protein KIAA1731 OS=Homo sapiens GN=KIAA1731 PE=2 SV=4                                                    |          |       |
| Q9C0D2-2               | K1731_HUMAN Isoform 2 of Protein KIAA1731 OS=Homo sapiens GN=KIAA1731                                                 |          |       |
| Q9C0D2-3               | K1731_HUMAN Isoform 3 of Protein KIAA1731 OS=Homo sapiens GN=KIAA1731                                                 |          |       |
| Q9C0D2-4               | K1731_HUMAN Isoform 4 of Protein KIAA1731 OS=Homo sapiens GN=KIAA1731                                                 |          |       |
| Q9C0D5                 | TANC1_HUMAN Protein TANC1 OS=Homo sapiens GN=TANC1 PE=1 SV=3                                                          |          |       |
| Q9C0D5-2               | TANC1_HUMAN Isoform 2 of Protein TANC1 OS=Homo sapiens GN=TANC1                                                       |          |       |
| Q9C0D5;Q9C0D5-2        | TANC1_HUMAN Protein TANC1 OS=Homo sapiens GN=TANC1 PE=1 SV=3;>sp Q9C0D5-2 TANC1_HUMAN Isoform 2 of Protein TANC1      | 3.38E-06 |       |
| Q9C0D6                 | FHDC1_HUMAN FH2 domain-containing protein 1 OS=Homo sapiens GN=FHDC1 PE=2 SV=2                                        |          |       |
| Q9C0D9                 | EPT1_HUMAN Ethanolaminophosphotransferase 1 OS=Homo sapiens GN=EPT1 PE=1 SV=3                                         | 3.26E-08 |       |
| Q9C0E8                 | LNP_HUMAN Protein lunapark OS=Homo sapiens GN=LNP PE=1 SV=2                                                           |          |       |
| Q9C0E8-2               | LNP_HUMAN Isoform 2 of Protein lunapark OS=Homo sapiens GN=LNP                                                        |          |       |
| Q9C0E8-3               | LNP_HUMAN Isoform 3 of Protein lunapark OS=Homo sapiens GN=LNP                                                        |          |       |
| Q9C0G0                 | ZN407_HUMAN Zinc finger protein 407 OS=Homo sapiens GN=ZNF407 PE=2 SV=2                                               |          |       |
| Q9C0G0-2               | ZN407_HUMAN Isoform 2 of Zinc finger protein 407 OS=Homo sapiens GN=ZNF407                                            |          |       |
| Q9C0G0-3               | ZN407_HUMAN Isoform 3 of Zinc finger protein 407 OS=Homo sapiens GN=ZNF407                                            |          |       |
| Q9C0G6                 | DYH6_HUMAN Dynein heavy chain 6, axonemal OS=Homo sapiens GN=DNAH6 PE=1 SV=3                                          |          |       |
| Q9C0G6-2               | DYH6_HUMAN Isoform 2 of Dynein heavy chain 6, axonemal OS=Homo sapiens GN=DNAH6                                       |          |       |
| Q9C0G6-4               | DYH6_HUMAN Isoform 4 of Dynein heavy chain 6, axonemal OS=Homo sapiens GN=DNAH6                                       |          |       |
| Q9C0G6;Q9C0G6-4        | DYH6_HUMAN Dynein heavy chain 6, axonemal OS=Homo sapiens GN=DNAH6 PE=1 SV=3;>sp Q9C0G6-4 DYH6_HUMAN Isoform 4 c      | 2.91E-10 |       |
| Q9C0I1;Q9C0I1-2;Q9C0I1 | MTMRC_HUMAN Myotubularin-related protein 12 OS=Homo sapiens GN=MTMR12 PE=1 SV=2;>sp Q9C0I1-2 MTMRC_HUMAN Isoform      | 2.50E-18 |       |
| Q9C0I9                 | LRC27_HUMAN Leucine-rich repeat-containing protein 27 OS=Homo sapiens GN=LRRC27 PE=2 SV=2                             |          |       |
| Q9C0I9-2               | LRC27_HUMAN Isoform 2 of Leucine-rich repeat-containing protein 27 OS=Homo sapiens GN=LRRC27                          |          |       |
| Q9C0I9-3               | LRC27_HUMAN Isoform 3 of Leucine-rich repeat-containing protein 27 OS=Homo sapiens GN=LRRC27                          |          |       |
| Q9C0I9-4               | LRC27_HUMAN Isoform 4 of Leucine-rich repeat-containing protein 27 OS=Homo sapiens GN=LRRC27                          |          |       |
| Q9C0J8                 | WDR33_HUMAN WD repeat-containing protein 33 OS=Homo sapiens GN=WDR33 PE=1 SV=2                                        |          | 67.58 |
| Q9C0J8-2               | WDR33_HUMAN Isoform 2 of WD repeat-containing protein 33 OS=Homo sapiens GN=WDR33                                     |          | 2.52  |
| Q9C0K3                 | ARP3C_HUMAN Actin-related protein 3C OS=Homo sapiens GN=ACTR3C PE=2 SV=1                                              |          | 61.16 |
| Q9GIP4                 | LAT1L_HUMAN Putative L-type amino acid transporter 1-like protein IMAA OS=Homo sapiens GN=SLC7A5P2 PE=5 SV=2          |          |       |
| Q9GIP4-1               | LAT1L_HUMAN Isoform 2 of Putative L-type amino acid transporter 1-like protein IMAA OS=Homo sapiens GN=SLC7A5P2       |          |       |
| Q9GIY3                 | 2B1E_HUMAN HLA class II histocompatibility antigen, DRB1-14 beta chain OS=Homo sapiens GN=HLA-DRB1 PE=1 SV=1          |          | 0.15  |
| Q9GZL7                 | WDR12_HUMAN Ribosome biogenesis protein WDR12 OS=Homo sapiens GN=WDR12 PE=1 SV=2                                      |          |       |
| Q9GZM3                 | RPB1B_HUMAN DNA-directed RNA polymerase II subunit RPB11-b1 OS=Homo sapiens GN=POLR2J2 PE=1 SV=1                      |          | 30.42 |
| Q9GZM3-2               | RPB1B_HUMAN Isoform 2 of DNA-directed RNA polymerase II subunit RPB11-b1 OS=Homo sapiens GN=POLR2J2                   |          | 3.43  |
| Q9GZM5                 | YIPF3_HUMAN Protein YIPF3 OS=Homo sapiens GN=YIPF3 PE=1 SV=1                                                          |          | 19.78 |
| Q9GZM7                 | TINAL_HUMAN Tubulointerstitial nephritis antigen-like OS=Homo sapiens GN=TINAGL1 PE=1 SV=1                            | 2.99E-88 |       |
| Q9GZM8                 | NDEL1_HUMAN Nuclear distribution protein nudE-like 1 OS=Homo sapiens GN=NDEL1 PE=1 SV=1                               |          |       |
| Q9GZM8-2               | NDEL1_HUMAN Isoform 2 of Nuclear distribution protein nudE-like 1 OS=Homo sapiens GN=NDEL1                            |          |       |
| Q9GZN7                 | ROGDI_HUMAN Protein rogd homolog OS=Homo sapiens GN=ROGDI PE=2 SV=1                                                   |          |       |
| Q9GZN8-2;Q9GZN8        | 2 CT027_HUMAN Isoform 2 of UPF0687 protein C20orf27 OS=Homo sapiens GN=C20orf27;>sp Q9GZN8 CT027_HUMAN UPF0687 pro    | 1.93E-18 |       |
| Q9GZP4                 | PITH1_HUMAN PITH domain-containing protein 1 OS=Homo sapiens GN=PITHD1 PE=1 SV=1                                      |          |       |



|                       |                                                                                                                                                                                                                                                 |          |        |
|-----------------------|-------------------------------------------------------------------------------------------------------------------------------------------------------------------------------------------------------------------------------------------------|----------|--------|
| Q9GZP4-2              | PITH1_HUMAN Isoform 2 of PITH domain-containing protein 1 OS=Homo sapiens GN=PITHD1                                                                                                                                                             |          |        |
| Q9GZP4;Q9GZP4-2       | PITH1_HUMAN PITH domain-containing protein 1 OS=Homo sapiens GN=PITHD1 PE=1 SV=1;>sp Q9GZP4-2 PITH1_HUMAN Isoform 2 of PITH domain-containing protein 1 OS=Homo sapiens GN=PITHD1 PE=1 SV=1                                                     | 8.28E-12 |        |
| Q9GZP4;Q9GZP4-2;B4DKI | CA128_HUMAN UPF0424 protein C1orf128 OS=Homo sapiens GN=C1orf128 PE=1 SV=1;>sp Q9GZP4-2 CA128_HUMAN Isoform 2 of UPF0424 protein C1orf128 OS=Homo sapiens GN=C1orf128 PE=1 SV=1                                                                 | 3.11E-17 |        |
| Q9GZP8;Q9GZP8-2       | IMUP_HUMAN Immortalization up-regulated protein OS=Homo sapiens GN=IMUP PE=1 SV=1;>sp Q9GZP8-2 IMUP_HUMAN Isoform 2 of Immortalization up-regulated protein OS=Homo sapiens GN=IMUP PE=1 SV=1                                                   | 1.31E-06 |        |
| Q9GZP9                | DERL2_HUMAN Derlin-2 OS=Homo sapiens GN=DERL2 PE=1 SV=1                                                                                                                                                                                         |          | 50.94  |
| Q9GZQ8                | MLP3B_HUMAN Microtubule-associated proteins 1A/1B light chain 3B OS=Homo sapiens GN=MAP1LC3B PE=1 SV=3                                                                                                                                          |          | 128.32 |
| Q9GZR2                | REXO4_HUMAN RNA exonuclease 4 OS=Homo sapiens GN=REXO4 PE=1 SV=2                                                                                                                                                                                |          | 25.88  |
| Q9GZR7                | DDX24_HUMAN ATP-dependent RNA helicase DDX24 OS=Homo sapiens GN=DDX24 PE=1 SV=1                                                                                                                                                                 |          | 123.41 |
| Q9GZS1                | RPA49_HUMAN DNA-directed RNA polymerase I subunit RPA49 OS=Homo sapiens GN=POLR1E PE=1 SV=2                                                                                                                                                     |          | 23.99  |
| Q9GZS1-2              | RPA49_HUMAN Isoform 2 of DNA-directed RNA polymerase I subunit RPA49 OS=Homo sapiens GN=POLR1E                                                                                                                                                  |          | 31.24  |
| Q9GZS1;Q9GZS1-2       | RPA49_HUMAN DNA-directed RNA polymerase I subunit RPA49 OS=Homo sapiens GN=POLR1E PE=1 SV=2;>sp Q9GZS1-2 RPA49_HUMAN Isoform 2 of DNA-directed RNA polymerase I subunit RPA49 OS=Homo sapiens GN=POLR1E                                         | 7.09E-15 |        |
| Q9GZS3                | WDR61_HUMAN WD repeat-containing protein 61 OS=Homo sapiens GN=WDR61 PE=1 SV=1                                                                                                                                                                  |          | 74.11  |
| Q9GZT3                | SLIRP_HUMAN SRA stem-loop-interacting RNA-binding protein, mitochondrial OS=Homo sapiens GN=SLIRP PE=1 SV=1                                                                                                                                     |          | 363.44 |
| Q9GZT8;Q9GZT8-2       | NIF3L_HUMAN NIF3-like protein 1 OS=Homo sapiens GN=NIF3L1 PE=1 SV=2;>sp Q9GZT8-2 NIF3L_HUMAN Isoform 2 of NIF3-like protein 1 OS=Homo sapiens GN=NIF3L1 PE=1 SV=2                                                                               | 2.81E-11 |        |
| Q9GZU2                | PEG3_HUMAN Paternally-expressed gene 3 protein OS=Homo sapiens GN=PEG3 PE=2 SV=1                                                                                                                                                                |          |        |
| Q9GZU2-2              | PEG3_HUMAN Isoform 2 of Paternally-expressed gene 3 protein OS=Homo sapiens GN=PEG3                                                                                                                                                             |          |        |
| Q9GZU2-3              | PEG3_HUMAN Isoform 3 of Paternally-expressed gene 3 protein OS=Homo sapiens GN=PEG3                                                                                                                                                             |          | 25.33  |
| Q9GZU8                | F192A_HUMAN Protein FAM192A OS=Homo sapiens GN=FAM192A PE=1 SV=1                                                                                                                                                                                |          | 114.59 |
| Q9GZV4                | IF5A2_HUMAN Eukaryotic translation initiation factor 5A-2 OS=Homo sapiens GN=EIF5A2 PE=1 SV=3                                                                                                                                                   |          | 317.85 |
| Q9GZX9                | TWSG1_HUMAN Twisted gastrulation protein homolog 1 OS=Homo sapiens GN=TWSG1 PE=2 SV=1                                                                                                                                                           |          | 47.59  |
| Q9GZX9-2              | TWSG1_HUMAN Isoform 2 of Twisted gastrulation protein homolog 1 OS=Homo sapiens GN=TWSG1                                                                                                                                                        |          | 47.59  |
| Q9GZY4                | CG044_HUMAN Uncharacterized protein C7orf44 OS=Homo sapiens GN=C7orf44 PE=1 SV=1                                                                                                                                                                |          |        |
| Q9GZZ1                | NAA50_HUMAN N-alpha-acetyltransferase 50, NatE catalytic subunit OS=Homo sapiens GN=NAA50 PE=1 SV=1                                                                                                                                             |          | 153.55 |
| Q9GZZ1-2              | NAA50_HUMAN Isoform 2 of N-alpha-acetyltransferase 50, NatE catalytic subunit OS=Homo sapiens GN=NAA50                                                                                                                                          |          | 134.6  |
| Q9GZZ1;Q9GZZ1-2       | NAA50_HUMAN N-alpha-acetyltransferase 50, NatE catalytic subunit OS=Homo sapiens GN=NAA50 PE=1 SV=1;>sp Q9GZZ1-2 NAA50_HUMAN Isoform 2 of N-alpha-acetyltransferase 50, NatE catalytic subunit OS=Homo sapiens GN=NAA50                         | 2.28E-79 |        |
| Q9GZZ9;Q9GZZ9-2       | UBA5_HUMAN Ubiquitin-like modifier-activating enzyme 5 OS=Homo sapiens GN=UBA5 PE=1 SV=1;>sp Q9GZZ9-2 UBA5_HUMAN Isoform 2 of Ubiquitin-like modifier-activating enzyme 5 OS=Homo sapiens GN=UBA5                                               | 4.44E-41 |        |
| Q9H008;Q9H008-2       | LHPP_HUMAN Phospholysine phosphohistidine inorganic pyrophosphate phosphatase OS=Homo sapiens GN=LHPP PE=1 SV=2;>sp Q9H008-2 LHPP_HUMAN Isoform 2 of Phospholysine phosphohistidine inorganic pyrophosphate phosphatase OS=Homo sapiens GN=LHPP | 8.78E-16 |        |
| Q9H061                | T126A_HUMAN Transmembrane protein 126A OS=Homo sapiens GN=TMEM126A PE=1 SV=1                                                                                                                                                                    |          |        |
| Q9H074                | PAIP1_HUMAN Polyadenylate-binding protein-interacting protein 1 OS=Homo sapiens GN=PAIP1 PE=1 SV=1                                                                                                                                              | 8.42E-33 |        |
| Q9H074-2;A6NKV8;D6REE | 2 PAIP1_HUMAN Isoform 2 of Polyadenylate-binding protein-interacting protein 1 OS=Homo sapiens GN=PAIP1;>tr A6NKV8 A6NKV8_HUMAN Isoform 2 of Polyadenylate-binding protein-interacting protein 1 OS=Homo sapiens GN=PAIP1                       | 6.29E-34 |        |
| Q9H074;Q9H074-2       | PAIP1_HUMAN Polyadenylate-binding protein-interacting protein 1 OS=Homo sapiens GN=PAIP1 PE=1 SV=1;>sp Q9H074-2 PAIP1_HUMAN Isoform 2 of Polyadenylate-binding protein-interacting protein 1 OS=Homo sapiens GN=PAIP1                           | 1.02E-23 |        |
| Q9H078                | CLPB_HUMAN Caseinolytic peptidase B protein homolog OS=Homo sapiens GN=CLPB PE=1 SV=1                                                                                                                                                           |          | 33.73  |
| Q9H078-2              | CLPB_HUMAN Isoform 2 of Caseinolytic peptidase B protein homolog OS=Homo sapiens GN=CLPB                                                                                                                                                        |          | 33.73  |
| Q9H078;Q9H078-2       | CLPB_HUMAN Caseinolytic peptidase B protein homolog OS=Homo sapiens GN=CLPB PE=1 SV=1;>sp Q9H078-2 CLPB_HUMAN Isoform 2 of Caseinolytic peptidase B protein homolog OS=Homo sapiens GN=CLPB                                                     | 6.93E-18 |        |
| Q9H082                | RB33B_HUMAN Ras-related protein Rab-33B OS=Homo sapiens GN=RAB33B PE=1 SV=1                                                                                                                                                                     |          | 65.77  |
| Q9H089                | LSG1_HUMAN Large subunit GTPase 1 homolog OS=Homo sapiens GN=LSG1 PE=1 SV=2                                                                                                                                                                     |          | 21.57  |
| Q9H098-2              | F107B_HUMAN Isoform 2 of Protein FAM107B OS=Homo sapiens GN=FAM107B                                                                                                                                                                             |          | 20.32  |
| Q9H098-2;Q9H098       | 2 F107B_HUMAN Isoform 2 of Protein FAM107B OS=Homo sapiens GN=FAM107B;>sp Q9H098 F107B_HUMAN Protein FAM107B OS=Homo sapiens GN=FAM107B                                                                                                         | 1.51E-79 |        |
| Q9H0A0                | NAT10_HUMAN N-acetyltransferase 10 OS=Homo sapiens GN=NAT10 PE=1 SV=2                                                                                                                                                                           |          | 333.63 |
| Q9H0A8                | COMD4_HUMAN COMM domain-containing protein 4 OS=Homo sapiens GN=COMMD4 PE=1 SV=1                                                                                                                                                                |          | 168.53 |
| Q9H0A8-2              | COMD4_HUMAN Isoform 2 of COMM domain-containing protein 4 OS=Homo sapiens GN=COMMD4                                                                                                                                                             |          | 166.45 |
| Q9H0A8;Q9H0A8-2       | COMD4_HUMAN COMM domain-containing protein 4 OS=Homo sapiens GN=COMMD4 PE=1 SV=1;>sp Q9H0A8-2 COMD4_HUMAN Isoform 2 of COMM domain-containing protein 4 OS=Homo sapiens GN=COMMD4                                                               | 2.29E-15 |        |
| Q9H0B6                | KLC2_HUMAN Kinesin light chain 2 OS=Homo sapiens GN=KLC2 PE=1 SV=1                                                                                                                                                                              | 1.90E-57 |        |
| Q9H0C2                | ADT4_HUMAN ADP/ATP translocase 4 OS=Homo sapiens GN=SLC25A31 PE=1 SV=1                                                                                                                                                                          |          | 195.76 |
| Q9H0C8                | ILKAP_HUMAN Integrin-linked kinase-associated serine/threonine phosphatase 2C OS=Homo sapiens GN=ILKAP PE=1 SV=1                                                                                                                                |          | 83.45  |
| Q9H0D6                | XRN2_HUMAN 5'-3' exoribonuclease 2 OS=Homo sapiens GN=XRN2 PE=1 SV=1                                                                                                                                                                            |          | 249.4  |
| Q9H0D6-2              | XRN2_HUMAN Isoform 2 of 5'-3' exoribonuclease 2 OS=Homo sapiens GN=XRN2                                                                                                                                                                         |          | 161.24 |
| Q9H0D6;Q9H0D6-2       | XRN2_HUMAN 5-3 exoribonuclease 2 OS=Homo sapiens GN=XRN2 PE=1 SV=1;>sp Q9H0D6-2 XRN2_HUMAN Isoform 2 of 5-3 exoribonuclease 2 OS=Homo sapiens GN=XRN2                                                                                           | 4.17E-73 |        |
| Q9H0E2                | TOLIP_HUMAN Toll-interacting protein OS=Homo sapiens GN=TOLLIP PE=1 SV=1                                                                                                                                                                        |          | 25.62  |
| Q9H0E7                | UBP44_HUMAN Ubiquitin carboxyl-terminal hydrolase 44 OS=Homo sapiens GN=USP44 PE=1 SV=2                                                                                                                                                         |          |        |
| Q9H0F6                | SHRPN_HUMAN Sharpin OS=Homo sapiens GN=SHARPIN PE=1 SV=1                                                                                                                                                                                        |          |        |
| Q9H0F6-2              | SHRPN_HUMAN Isoform 2 of Sharpin OS=Homo sapiens GN=SHARPIN                                                                                                                                                                                     |          |        |
| Q9H0G5                | NSRP1_HUMAN Nuclear speckle splicing regulatory protein 1 OS=Homo sapiens GN=NSRP1 PE=1 SV=1                                                                                                                                                    | 1.96E-08 |        |
| Q9H0H0                | INT2_HUMAN Integrator complex subunit 2 OS=Homo sapiens GN=INTS2 PE=1 SV=2                                                                                                                                                                      |          |        |
| Q9H0H5                | RGAP1_HUMAN Rac GTPase-activating protein 1 OS=Homo sapiens GN=RACGAP1 PE=1 SV=1                                                                                                                                                                |          |        |
| Q9H0I3                | CC113_HUMAN Coiled-coil domain-containing protein 113 OS=Homo sapiens GN=CCDC113 PE=2 SV=1                                                                                                                                                      |          |        |
| Q9H0L4                | CSTFT_HUMAN Cleavage stimulation factor subunit 2 tau variant OS=Homo sapiens GN=CSTF2T PE=1 SV=1                                                                                                                                               |          | 90.11  |
| Q9H0N0                | RAB6C_HUMAN Ras-related protein Rab-6C OS=Homo sapiens GN=RAB6C PE=2 SV=2                                                                                                                                                                       |          | 91.09  |
| Q9H0N5                | PHS2_HUMAN Pterin-4-alpha-carbinolamine dehydratase 2 OS=Homo sapiens GN=PCBD2 PE=1 SV=4                                                                                                                                                        | 1.52E-09 |        |
| Q9H0P0-1              | 1 5NT3_HUMAN Isoform 1 of Cytosolic 5-nucleotidase 3 OS=Homo sapiens GN=NT5C3                                                                                                                                                                   | 1.97E-17 |        |
| Q9H0P0;Q9H0P0-1;Q9H0F | 5NT3_HUMAN Cytosolic 5-nucleotidase 3 OS=Homo sapiens GN=NT5C3 PE=1 SV=3;>sp Q9H0P0-1 5NT3_HUMAN Isoform 1 of Cytosolic 5-nucleotidase 3 OS=Homo sapiens GN=NT5C3                                                                               | 3.89E-29 |        |

|                          |                                                                                                                        |           |         |
|--------------------------|------------------------------------------------------------------------------------------------------------------------|-----------|---------|
| Q9H0Q0                   | FA49A_HUMAN Protein FAM49A OS=Homo sapiens GN=FAM49A PE=1 SV=1                                                         |           |         |
| Q9H0R4;Q9H0R4-2          | HDHD2_HUMAN Haloacid dehalogenase-like hydrolase domain-containing protein 2 OS=Homo sapiens GN=HDHD2 PE=1 SV=1;>sp Q  | 1.05E-14  |         |
| Q9H0S4                   | DDX47_HUMAN Probable ATP-dependent RNA helicase DDX47 OS=Homo sapiens GN=DDX47 PE=1 SV=1                               |           | 75.14   |
| Q9H0U3                   | MAGT1_HUMAN Magnesium transporter protein 1 OS=Homo sapiens GN=MAGT1 PE=1 SV=1                                         |           | 104.95  |
| Q9H0U4                   | RAB1B_HUMAN Ras-related protein Rab-1B OS=Homo sapiens GN=RAB1B PE=1 SV=1                                              |           | 1125.06 |
| Q9H0U6                   | RM18_HUMAN 39S ribosomal protein L18, mitochondrial OS=Homo sapiens GN=MRPL18 PE=1 SV=1                                |           | 85.19   |
| Q9H0U9                   | TSYL1_HUMAN Testis-specific Y-encoded-like protein 1 OS=Homo sapiens GN=TSYL1 PE=1 SV=3                                |           |         |
| Q9H0V9-2;Q9H0V9          | 2 LMA2L_HUMAN Isoform 2 of VIP36-like protein OS=Homo sapiens GN=LMA2L;>sp Q9H0V9 LMA2L_HUMAN VIP36-like protein OS=   | 2.82E-09  |         |
| Q9H0W5                   | CCDC8_HUMAN Coiled-coil domain-containing protein 8 OS=Homo sapiens GN=CCDC8 PE=1 SV=2                                 |           |         |
| Q9H0W8;Q9H0W8-2          | SMG9_HUMAN Protein SMG9 OS=Homo sapiens GN=SMG9 PE=1 SV=1;>sp Q9H0W8-2 SMG9_HUMAN Isoform 2 of Protein SMG9 OS=        | 3.26E-06  |         |
| Q9H0W9;Q9H0W9-2;Q9H0W9-2 | CK054_HUMAN Ester hydrolase C11orf54 OS=Homo sapiens GN=C11orf54 PE=1 SV=1;>sp Q9H0W9-2 CK054_HUMAN Isoform 2 of E     | 7.84E-15  |         |
| Q9H106                   | SIRPD_HUMAN Signal-regulatory protein delta OS=Homo sapiens GN=SIRPD PE=2 SV=2                                         |           |         |
| Q9H115                   | SNAB_HUMAN Beta-soluble NSF attachment protein OS=Homo sapiens GN=NAPB PE=1 SV=2                                       |           |         |
| Q9H147                   | TDIF1_HUMAN Deoxynucleotidyltransferase terminal-interacting protein 1 OS=Homo sapiens GN=DNTTIP1 PE=1 SV=2            |           | 63.01   |
| Q9H159                   | CAD19_HUMAN Cadherin-19 OS=Homo sapiens GN=CDH19 PE=2 SV=1                                                             | 1.78E-09  |         |
| Q9H169-2;Q9H169          | 2 STMN4_HUMAN Isoform 2 of Stathmin-4 OS=Homo sapiens GN=STMN4;>sp Q9H169 STMN4_HUMAN Stathmin-4 OS=Homo sapien        | 2.87E-11  |         |
| Q9H171                   | ZBP1_HUMAN Z-DNA-binding protein 1 OS=Homo sapiens GN=ZBP1 PE=1 SV=2                                                   |           |         |
| Q9H171-2                 | ZBP1_HUMAN Isoform 2 of Z-DNA-binding protein 1 OS=Homo sapiens GN=ZBP1                                                |           |         |
| Q9H171-3                 | ZBP1_HUMAN Isoform 3 of Z-DNA-binding protein 1 OS=Homo sapiens GN=ZBP1                                                |           |         |
| Q9H171-4                 | ZBP1_HUMAN Isoform 4 of Z-DNA-binding protein 1 OS=Homo sapiens GN=ZBP1                                                |           |         |
| Q9H171-5                 | ZBP1_HUMAN Isoform 5 of Z-DNA-binding protein 1 OS=Homo sapiens GN=ZBP1                                                |           |         |
| Q9H173                   | SIL1_HUMAN Nucleotide exchange factor SIL1 OS=Homo sapiens GN=SIL1 PE=1 SV=1                                           |           | 57.29   |
| Q9H1A4                   | APC1_HUMAN Anaphase-promoting complex subunit 1 OS=Homo sapiens GN=ANAPC1 PE=1 SV=1                                    |           |         |
| Q9H1A7                   | RPB1C_HUMAN DNA-directed RNA polymerase II subunit RPB11-b2 OS=Homo sapiens GN=POLR2J3 PE=3 SV=1                       |           | 30.42   |
| Q9H1C4                   | UN93B_HUMAN Protein unc-93 homolog B1 OS=Homo sapiens GN=UNC93B1 PE=1 SV=2                                             |           | 56.38   |
| Q9H1C7                   | CE032_HUMAN UPF0467 protein C5orf32 OS=Homo sapiens GN=C5orf32 PE=2 SV=1                                               |           | 58.75   |
| Q9H1E3                   | NUCKS_HUMAN Nuclear ubiquitous casein and cyclin-dependent kinases substrate OS=Homo sapiens GN=NUCKS1 PE=1 SV=1       |           |         |
| Q9H1E3-2                 | NUCKS_HUMAN Isoform 2 of Nuclear ubiquitous casein and cyclin-dependent kinases substrate OS=Homo sapiens GN=NUCKS1    |           |         |
| Q9H1E3;Q9H1E3-2          | NUCKS_HUMAN Nuclear ubiquitous casein and cyclin-dependent kinases substrate OS=Homo sapiens GN=NUCKS1 PE=1 SV=1;>sp Q | 1.13E-214 |         |
| Q9H1E5                   | TMX4_HUMAN Thioredoxin-related transmembrane protein 4 OS=Homo sapiens GN=TMX4 PE=1 SV=1                               |           |         |
| Q9H1H9;Q9H1H9-2;Q9H1H9-2 | KI13A_HUMAN Kinesin-like protein KIF13A OS=Homo sapiens GN=KIF13A PE=1 SV=2;>sp Q9H1H9-2 KI13A_HUMAN Isoform 2 of Kii  | 1.60E-08  |         |
| Q9H1J5                   | WNT8A_HUMAN Protein Wnt-8a OS=Homo sapiens GN=WNT8A PE=2 SV=2                                                          |           |         |
| Q9H1J5-2                 | WNT8A_HUMAN Isoform 2 of Protein Wnt-8a OS=Homo sapiens GN=WNT8A                                                       |           |         |
| Q9H1K1                   | ISCU_HUMAN Iron-sulfur cluster assembly enzyme ISCU, mitochondrial OS=Homo sapiens GN=ISCU PE=1 SV=2                   |           | 37.04   |
| Q9H1K1-2                 | ISCU_HUMAN Isoform 2 of Iron-sulfur cluster assembly enzyme ISCU, mitochondrial OS=Homo sapiens GN=ISCU                |           | 37.04   |
| Q9H1K1;Q9H1K1-2          | ISCU_HUMAN Iron-sulfur cluster assembly enzyme ISCU, mitochondrial OS=Homo sapiens GN=ISCU PE=1 SV=2;>sp Q9H1K1-2 ISCU | 3.87E-06  |         |
| Q9H1K4                   | GHC2_HUMAN Mitochondrial glutamate carrier 2 OS=Homo sapiens GN=SLC25A18 PE=2 SV=1                                     |           | 48.58   |
| Q9H1K6                   | MESD1_HUMAN Mesoderm development candidate 1 OS=Homo sapiens GN=MESDC1 PE=1 SV=1                                       |           |         |
| Q9H1R2                   | DUS15_HUMAN Dual specificity protein phosphatase 15 OS=Homo sapiens GN=DUSP15 PE=1 SV=4                                |           | 0.68    |
| Q9H1R2-2                 | DUS15_HUMAN Isoform 2 of Dual specificity protein phosphatase 15 OS=Homo sapiens GN=DUSP15                             |           | 20.56   |
| Q9H1R2-3                 | DUS15_HUMAN Isoform 3 of Dual specificity protein phosphatase 15 OS=Homo sapiens GN=DUSP15                             |           | 20.56   |
| Q9H1R3                   | MYLK2_HUMAN Myosin light chain kinase 2, skeletal/cardiac muscle OS=Homo sapiens GN=MYLK2 PE=1 SV=3                    |           | 41.33   |
| Q9H1X3-3                 | DJC25_HUMAN Isoform 3 of DnaJ homolog subfamily C member 25 OS=Homo sapiens GN=DNAJC25                                 |           |         |
| Q9H1Y0                   | ATG5_HUMAN Autophagy protein 5 OS=Homo sapiens GN=ATG5 PE=1 SV=2                                                       |           | 39.21   |
| Q9H1Z8                   | AUGN_HUMAN Augurin OS=Homo sapiens GN=C2orf40 PE=1 SV=1                                                                |           |         |
| Q9H201                   | EPN3_HUMAN Epsin-3 OS=Homo sapiens GN=EPN3 PE=1 SV=1                                                                   |           | 58.77   |
| Q9H201-2                 | EPN3_HUMAN Isoform 2 of Epsin-3 OS=Homo sapiens GN=EPN3                                                                |           | 58.77   |
| Q9H201;Q9H201-2          | EPN3_HUMAN Epsin-3 OS=Homo sapiens GN=EPN3 PE=1 SV=1;>sp Q9H201-2 EPN3_HUMAN Isoform 2 of Epsin-3 OS=Homo sapien:      | 8.79E-10  |         |
| Q9H223                   | EHD4_HUMAN EH domain-containing protein 4 OS=Homo sapiens GN=EHD4 PE=1 SV=1                                            |           | 359.86  |
| Q9H227                   | GBA3_HUMAN Cytosolic beta-glucosidase OS=Homo sapiens GN=GBA3 PE=1 SV=2                                                |           |         |
| Q9H227-2                 | GBA3_HUMAN Isoform 2 of Cytosolic beta-glucosidase OS=Homo sapiens GN=GBA3                                             |           |         |
| Q9H254                   | SPTN4_HUMAN Spectrin beta chain, brain 3 OS=Homo sapiens GN=SPTBN4 PE=1 SV=2                                           |           | 208.4   |
| Q9H254-2                 | SPTN4_HUMAN Isoform 2 of Spectrin beta chain, brain 3 OS=Homo sapiens GN=SPTBN4                                        |           | 158.03  |
| Q9H254-3                 | SPTN4_HUMAN Isoform 3 of Spectrin beta chain, brain 3 OS=Homo sapiens GN=SPTBN4                                        |           | 50.37   |
| Q9H254-4                 | SPTN4_HUMAN Isoform 4 of Spectrin beta chain, brain 3 OS=Homo sapiens GN=SPTBN4                                        |           | 193.48  |
| Q9H254;Q9H254-4;Q9H254-4 | SPTN4_HUMAN Spectrin beta chain, brain 3 OS=Homo sapiens GN=SPTBN4 PE=1 SV=2;>sp Q9H254-4 SPTN4_HUMAN Isoform 4 of S   | 6.42E-22  |         |
| Q9H267                   | VP33B_HUMAN Vacuolar protein sorting-associated protein 33B OS=Homo sapiens GN=VPS33B PE=1 SV=2                        | 1.09E-159 |         |
| Q9H299                   | SH3L3_HUMAN SH3 domain-binding glutamic acid-rich-like protein 3 OS=Homo sapiens GN=SH3BGRL3 PE=1 SV=1                 |           | 106.13  |
| Q9H2D6                   | TARA_HUMAN TRIO and F-actin-binding protein OS=Homo sapiens GN=TRIOBP PE=1 SV=3                                        |           | 91.62   |
| Q9H2D6-2                 | TARA_HUMAN Isoform 3 of TRIO and F-actin-binding protein OS=Homo sapiens GN=TRIOBP                                     |           | 91.62   |
| Q9H2D6-3                 | TARA_HUMAN Isoform 4 of TRIO and F-actin-binding protein OS=Homo sapiens GN=TRIOBP                                     |           | 91.62   |

|                          |                                                                                                                            |           |        |
|--------------------------|----------------------------------------------------------------------------------------------------------------------------|-----------|--------|
| Q9H2D6-4                 | TARA_HUMAN Isoform 5 of TRIO and F-actin-binding protein OS=Homo sapiens GN=TRIOBP                                         |           | 0.37   |
| Q9H2D6-5                 | TARA_HUMAN Isoform 1 of TRIO and F-actin-binding protein OS=Homo sapiens GN=TRIOBP                                         |           | 91.25  |
| Q9H2D6;Q9H2D6-2;Q9H2E6   | TARA_HUMAN TRIO and F-actin-binding protein OS=Homo sapiens GN=TRIOBP PE=1 SV=3;>sp Q9H2D6-2 TARA_HUMAN Isoform 3 c        | 1.72E-15  |        |
| Q9H2E6-2                 | SEM6A_HUMAN Semaphorin-6A OS=Homo sapiens GN=SEMA6A PE=1 SV=2                                                              |           |        |
| Q9H2G2                   | SEM6A_HUMAN Isoform 2 of Semaphorin-6A OS=Homo sapiens GN=SEMA6A                                                           |           |        |
| Q9H2G2-2                 | SLK_HUMAN STE20-like serine/threonine-protein kinase OS=Homo sapiens GN=SLK PE=1 SV=1                                      | 6.28E-187 |        |
| Q9H2H8                   | 2 SLK_HUMAN Isoform 2 of STE20-like serine/threonine-protein kinase OS=Homo sapiens GN=SLK                                 | 2.79E-191 |        |
| Q9H2H8-2                 | PPIL3_HUMAN Peptidyl-prolyl cis-trans isomerase-like 3 OS=Homo sapiens GN=PPIL3 PE=1 SV=1                                  |           | 132.1  |
| Q9H2H8-2;Q9H2H8          | PPIL3_HUMAN Isoform 2 of Peptidyl-prolyl cis-trans isomerase-like 3 OS=Homo sapiens GN=PPIL3                               |           | 62.27  |
| Q9H2H9                   | 2 PPIL3_HUMAN Isoform 2 of Peptidyl-prolyl cis-trans isomerase-like 3 OS=Homo sapiens GN=PPIL3;>sp Q9H2H8 PPIL3_HUMAN Pepi | 9.25E-10  |        |
| Q9H2J4                   | S38A1_HUMAN Sodium-coupled neutral amino acid transporter 1 OS=Homo sapiens GN=SLC38A1 PE=1 SV=1                           |           |        |
| Q9H2K0                   | PDCL3_HUMAN Phosducin-like protein 3 OS=Homo sapiens GN=PDCL3 PE=1 SV=1                                                    |           | 37.94  |
| Q9H2K8                   | IF3M_HUMAN Translation initiation factor IF-3, mitochondrial OS=Homo sapiens GN=MTIF3 PE=1 SV=4                            | 1.70E-49  |        |
| Q9H2M9                   | TAOK3_HUMAN Serine/threonine-protein kinase TAO3 OS=Homo sapiens GN=TAOK3 PE=1 SV=2                                        | 5.24E-20  |        |
| Q9H2M9-2                 | RBGPR_HUMAN Rab3 GTPase-activating protein non-catalytic subunit OS=Homo sapiens GN=RAB3GAP2 PE=1 SV=1                     |           |        |
| Q9H2P0                   | RBGPR_HUMAN Isoform 2 of Rab3 GTPase-activating protein non-catalytic subunit OS=Homo sapiens GN=RAB3GAP2                  |           |        |
| Q9H2U1                   | ADNP_HUMAN Activity-dependent neuroprotector homeobox protein OS=Homo sapiens GN=ADNP PE=1 SV=1                            |           |        |
| Q9H2U1-2                 | DHX36_HUMAN Probable ATP-dependent RNA helicase DHX36 OS=Homo sapiens GN=DHX36 PE=1 SV=2                                   |           | 65     |
| Q9H2U1-3                 | DHX36_HUMAN Isoform 2 of Probable ATP-dependent RNA helicase DHX36 OS=Homo sapiens GN=DHX36                                |           | 65     |
| Q9H2U1;Q9H2U1-2;Q9H2U2   | DHX36_HUMAN Isoform 3 of Probable ATP-dependent RNA helicase DHX36 OS=Homo sapiens GN=DHX36                                |           | 65     |
| Q9H2U2-2                 | DHX36_HUMAN Probable ATP-dependent RNA helicase DHX36 OS=Homo sapiens GN=DHX36 PE=1 SV=2;>sp Q9H2U1-2 DHX36_HUM            | 5.92E-12  |        |
| Q9H2U2-2;Q9H2U2;E2QR12   | IPYR2_HUMAN Inorganic pyrophosphatase 2, mitochondrial OS=Homo sapiens GN=PPA2 PE=1 SV=2                                   |           | 152.12 |
| Q9H2U2-3                 | IPYR2_HUMAN Isoform 2 of Inorganic pyrophosphatase 2, mitochondrial OS=Homo sapiens GN=PPA2                                |           | 152.12 |
| Q9H2U2-4                 | 2 IPYR2_HUMAN Isoform 2 of Inorganic pyrophosphatase 2, mitochondrial OS=Homo sapiens GN=PPA2;>sp Q9H2U2 IPYR2_HUMAN I     | 1.74E-122 |        |
| Q9H2W6                   | IPYR2_HUMAN Isoform 3 of Inorganic pyrophosphatase 2, mitochondrial OS=Homo sapiens GN=PPA2                                |           | 145.06 |
| Q9H2X6                   | IPYR2_HUMAN Isoform 4 of Inorganic pyrophosphatase 2, mitochondrial OS=Homo sapiens GN=PPA2                                |           | 64.81  |
| Q9H2X6-2                 | RM46_HUMAN 39S ribosomal protein L46, mitochondrial OS=Homo sapiens GN=MRPL46 PE=1 SV=1                                    |           | 117.78 |
| Q9H2X6-3                 | HIPK2_HUMAN Homeodomain-interacting protein kinase 2 OS=Homo sapiens GN=HIPK2 PE=1 SV=2                                    |           |        |
| Q9H307                   | HIPK2_HUMAN Isoform 2 of Homeodomain-interacting protein kinase 2 OS=Homo sapiens GN=HIPK2                                 |           |        |
| Q9H307-2                 | HIPK2_HUMAN Isoform 3 of Homeodomain-interacting protein kinase 2 OS=Homo sapiens GN=HIPK2                                 |           |        |
| Q9H307;Q9H307-2          | PININ_HUMAN Pinin OS=Homo sapiens GN=PNN PE=1 SV=4                                                                         |           |        |
| Q9H329                   | PININ_HUMAN Isoform 2 of Pinin OS=Homo sapiens GN=PNN                                                                      |           |        |
| Q9H329-2                 | PININ_HUMAN Pinin OS=Homo sapiens GN=PNN PE=1 SV=4;>sp Q9H307-2 PININ_HUMAN Isoform 2 of Pinin OS=Homo sapiens GN=         | 9.95E-95  |        |
| Q9H330                   | E41LB_HUMAN Band 4.1-like protein 4B OS=Homo sapiens GN=EPB41L4B PE=2 SV=2                                                 |           |        |
| Q9H330-2                 | E41LB_HUMAN Isoform 2 of Band 4.1-like protein 4B OS=Homo sapiens GN=EPB41L4B                                              |           |        |
| Q9H330-3                 | CI005_HUMAN Transmembrane protein C9orf5 OS=Homo sapiens GN=C9orf5 PE=1 SV=2                                               |           | 143.03 |
| Q9H330-4                 | CI005_HUMAN Isoform 2 of Transmembrane protein C9orf5 OS=Homo sapiens GN=C9orf5                                            |           | 131.23 |
| Q9H330;Q9H330-2;Q9H330-3 | CI005_HUMAN Isoform 3 of Transmembrane protein C9orf5 OS=Homo sapiens GN=C9orf5                                            |           | 5.63   |
| Q9H330-4                 | CI005_HUMAN Isoform 4 of Transmembrane protein C9orf5 OS=Homo sapiens GN=C9orf5                                            |           | 114.93 |
| Q9H330;Q9H330-2;Q9H330-3 | CI005_HUMAN Transmembrane protein C9orf5 OS=Homo sapiens GN=C9orf5 PE=1 SV=2;>sp Q9H330-2 CI005_HUMAN Isoform 2 of         | 3.77E-12  |        |
| Q9H334                   | FOXP1_HUMAN Forkhead box protein P1 OS=Homo sapiens GN=FOXP1 PE=1 SV=1                                                     |           |        |
| Q9H334-2                 | FOXP1_HUMAN Isoform 2 of Forkhead box protein P1 OS=Homo sapiens GN=FOXP1                                                  |           |        |
| Q9H334-3                 | FOXP1_HUMAN Isoform 3 of Forkhead box protein P1 OS=Homo sapiens GN=FOXP1                                                  |           |        |
| Q9H334-4                 | FOXP1_HUMAN Isoform 4 of Forkhead box protein P1 OS=Homo sapiens GN=FOXP1                                                  |           |        |
| Q9H361                   | PABP3_HUMAN Polyadenylate-binding protein 3 OS=Homo sapiens GN=PABPC3 PE=1 SV=2                                            |           | 930.66 |
| Q9H3H3                   | CK068_HUMAN UPF0696 protein C11orf68 OS=Homo sapiens GN=C11orf68 PE=1 SV=1                                                 | 2.26E-11  |        |
| Q9H3H3-3;Q9H3H3-2;Q9H3K2 | 3 CK068_HUMAN Isoform 3 of UPF0696 protein C11orf68 OS=Homo sapiens GN=C11orf68;>sp Q9H3H3-2 CK068_HUMAN Isoform 2         | 7.75E-30  |        |
| Q9H3K6                   | GHITM_HUMAN Growth hormone-inducible transmembrane protein OS=Homo sapiens GN=GHITM PE=1 SV=2                              |           | 105.38 |
| Q9H3K6-2                 | BOLA2_HUMAN Bola-like protein 2 OS=Homo sapiens GN=BOLA2 PE=1 SV=1                                                         |           | 64.04  |
| Q9H3K6;Q9H3K6-2          | BOLA2_HUMAN Isoform 2 of Bola-like protein 2 OS=Homo sapiens GN=BOLA2                                                      |           | 52.29  |
| Q9H3M7                   | BOLA2_HUMAN Bola-like protein 2 OS=Homo sapiens GN=BOLA2 PE=1 SV=1;>sp Q9H3K6-2 BOLA2_HUMAN Isoform 2 of Bola-like p       | 1.04E-217 |        |
| Q9H3N1                   | TXNIP_HUMAN Thioredoxin-interacting protein OS=Homo sapiens GN=TXNIP PE=1 SV=1                                             |           | 59.01  |
| Q9H3N8                   | TMX1_HUMAN Thioredoxin-related transmembrane protein 1 OS=Homo sapiens GN=TMX1 PE=1 SV=1                                   |           | 411.73 |
| Q9H3P2                   | HRH4_HUMAN Histamine H4 receptor OS=Homo sapiens GN=HRH4 PE=1 SV=2                                                         |           | 22.53  |
| Q9H3P7                   | NELFA_HUMAN Negative elongation factor A OS=Homo sapiens GN=WHSC2 PE=1 SV=3                                                |           | 30.39  |
| Q9H3Q1                   | GCP60_HUMAN Golgi resident protein GCP60 OS=Homo sapiens GN=ACBD3 PE=1 SV=4                                                |           |        |
| Q9H3S4                   | BORG4_HUMAN Cdc42 effector protein 4 OS=Homo sapiens GN=CDC42EP4 PE=1 SV=1                                                 | 2.84E-06  |        |
| Q9H3S7                   | TPK1_HUMAN Thiamin pyrophosphokinase 1 OS=Homo sapiens GN=TPK1 PE=1 SV=1                                                   |           |        |
| Q9H3U1                   | PTN23_HUMAN Tyrosine-protein phosphatase non-receptor type 23 OS=Homo sapiens GN=PTPN23 PE=1 SV=1                          |           | 36.97  |
| Q9H3U1-2                 | UN45A_HUMAN Protein unc-45 homolog A OS=Homo sapiens GN=UNC45A PE=1 SV=1                                                   |           |        |
| Q9H3U1-2                 | UN45A_HUMAN Isoform 2 of Protein unc-45 homolog A OS=Homo sapiens GN=UNC45A                                                |           |        |

|                            |                                                                                                                                            |           |         |
|----------------------------|--------------------------------------------------------------------------------------------------------------------------------------------|-----------|---------|
| Q9H3U1-3                   | UN45A_HUMAN Isoform 3 of Protein unc-45 homolog A OS=Homo sapiens GN=UNC45A                                                                |           |         |
| Q9H3U1;A8K6F7;Q9H3U1       | UN45A_HUMAN Protein unc-45 homolog A OS=Homo sapiens GN=UNC45A PE=1 SV=1;>tr A8K6F7 A8K6F7_HUMAN Unc-45 homolog                            | 8.25E-26  |         |
| Q9H3Y0                     | CRSPL_HUMAN Peptidase inhibitor R3HDML OS=Homo sapiens GN=R3HDML PE=1 SV=1                                                                 |           |         |
| Q9H3Z4                     | DNJC5_HUMAN DnaJ homolog subfamily C member 5 OS=Homo sapiens GN=DNAJCS PE=1 SV=1                                                          |           | 29.78   |
| Q9H3Z4-2                   | DNJC5_HUMAN Isoform 2 of DnaJ homolog subfamily C member 5 OS=Homo sapiens GN=DNAJCS                                                       |           | 29.78   |
| Q9H3Z4;Q9H3Z4-2            | DNJC5_HUMAN DnaJ homolog subfamily C member 5 OS=Homo sapiens GN=DNAJCS PE=1 SV=1;>sp Q9H3Z4-2 DNJC5_HUMAN Isof                            | 1.47E-06  |         |
| Q9H444                     | CHM4B_HUMAN Charged multivesicular body protein 4b OS=Homo sapiens GN=CHMP4B PE=1 SV=1                                                     |           | 35.46   |
| Q9H446                     | RWDD1_HUMAN RWD domain-containing protein 1 OS=Homo sapiens GN=RWDD1 PE=1 SV=1                                                             | 3.93E-10  |         |
| Q9H467                     | CUED2_HUMAN CUE domain-containing protein 2 OS=Homo sapiens GN=CUEDC2 PE=1 SV=1                                                            |           | 28.14   |
| Q9H477                     | RBSK_HUMAN Ribokinase OS=Homo sapiens GN=RBKS PE=1 SV=1                                                                                    |           |         |
| Q9H479                     | FN3K_HUMAN Fructosamine-3-kinase OS=Homo sapiens GN=FN3K PE=1 SV=1                                                                         |           |         |
| Q9H488                     | OFUT1_HUMAN GDP-fucose protein O-fucosyltransferase 1 OS=Homo sapiens GN=POFUT1 PE=1 SV=1                                                  |           | 121.22  |
| Q9H488-2                   | OFUT1_HUMAN Isoform 2 of GDP-fucose protein O-fucosyltransferase 1 OS=Homo sapiens GN=POFUT1                                               |           | 117.76  |
| Q9H488;Q9H488-2            | OFUT1_HUMAN GDP-fucose protein O-fucosyltransferase 1 OS=Homo sapiens GN=POFUT1 PE=1 SV=1;>sp Q9H488-2 OFUT1_HUMAN                         | 2.98E-21  |         |
| Q9H492                     | MLP3A_HUMAN Microtubule-associated proteins 1A/1B light chain 3A OS=Homo sapiens GN=MAP1LC3A PE=1 SV=2                                     |           | 45.87   |
| Q9H492-2                   | MLP3A_HUMAN Isoform 2 of Microtubule-associated proteins 1A/1B light chain 3A OS=Homo sapiens GN=MAP1LC3A                                  |           | 44.61   |
| Q9H4A3-6;Q9H4A3-5;D3E6     | WNK1_HUMAN Isoform 5 of Serine/threonine-protein kinase WNK1 OS=Homo sapiens GN=WNK1;>sp Q9H4A3-5 WNK1_HUMAN Isof                          | 2.38E-07  |         |
| Q9H4A4                     | AMPB_HUMAN Aminopeptidase B OS=Homo sapiens GN=RNPEP PE=1 SV=2                                                                             | 6.74E-103 |         |
| Q9H4A5                     | GLP3L_HUMAN Golgi phosphoprotein 3-like OS=Homo sapiens GN=GOLPH3L PE=1 SV=1                                                               |           | 83.44   |
| Q9H4A6                     | GOLP3_HUMAN Golgi phosphoprotein 3 OS=Homo sapiens GN=GOLPH3 PE=1 SV=1                                                                     |           | 197.25  |
| Q9H4B7                     | TBB1_HUMAN Tubulin beta-1 chain OS=Homo sapiens GN=TUBB1 PE=1 SV=1                                                                         |           | 320.46  |
| Q9H4E5                     | RHOJ_HUMAN Rho-related GTP-binding protein RhoJ OS=Homo sapiens GN=RHOJ PE=1 SV=1                                                          |           | 55.7    |
| Q9H4E5-2                   | RHOJ_HUMAN Isoform 2 of Rho-related GTP-binding protein RhoJ OS=Homo sapiens GN=RHOJ                                                       |           | 55.7    |
| Q9H4E7                     | DEFI6_HUMAN Differentially expressed in FDCP 6 homolog OS=Homo sapiens GN=DEF6 PE=1 SV=1                                                   | 9.80E-54  |         |
| Q9H4G0                     | E41L1_HUMAN Band 4.1-like protein 1 OS=Homo sapiens GN=EPB41L1 PE=1 SV=2                                                                   |           | 3.07    |
| Q9H4G0-2                   | E41L1_HUMAN Isoform 2 of Band 4.1-like protein 1 OS=Homo sapiens GN=EPB41L1                                                                |           | 3.07    |
| Q9H4G0-2;Q9H4G0-3;Q9H4G0-3 | E41L1_HUMAN Isoform 2 of Band 4.1-like protein 1 OS=Homo sapiens GN=EPB41L1;>sp Q9H4G0-3 E41L1_HUMAN Isoform 3 of Bæ                       | 9.85E-102 |         |
| Q9H4G0-3                   | E41L1_HUMAN Isoform 3 of Band 4.1-like protein 1 OS=Homo sapiens GN=EPB41L1                                                                |           | 3.07    |
| Q9H4G0-4                   | E41L1_HUMAN Isoform 4 of Band 4.1-like protein 1 OS=Homo sapiens GN=EPB41L1                                                                |           | 3.07    |
| Q9H4G4                     | GAPR1_HUMAN Golgi-associated plant pathogenesis-related protein 1 OS=Homo sapiens GN=GLIPR2 PE=1 SV=3                                      |           | 61.6    |
| Q9H4I0                     | RD21L_HUMAN Double-strand-break repair protein rad21-like protein 1 OS=Homo sapiens GN=RAD21L1 PE=2 SV=3                                   |           |         |
| Q9H4I0-2                   | RD21L_HUMAN Isoform 2 of Double-strand-break repair protein rad21-like protein 1 OS=Homo sapiens GN=RAD21L1                                |           |         |
| Q9H4I2                     | ZHX3_HUMAN Zinc fingers and homeoboxes protein 3 OS=Homo sapiens GN=ZHX3 PE=1 SV=3                                                         |           |         |
| Q9H4I8-3                   | SEHL2_HUMAN Isoform 3 of Serine hydrolase-like protein 2 OS=Homo sapiens GN=SERHL2                                                         |           |         |
| Q9H4L4                     | SENP3_HUMAN Sentrin-specific protease 3 OS=Homo sapiens GN=SENP3 PE=1 SV=2                                                                 |           |         |
| Q9H4L5                     | OSBL3_HUMAN Oxysterol-binding protein-related protein 3 OS=Homo sapiens GN=OSBPL3 PE=1 SV=1                                                |           | 28.37   |
| Q9H4L5-2                   | OSBL3_HUMAN Isoform 1b of Oxysterol-binding protein-related protein 3 OS=Homo sapiens GN=OSBPL3                                            |           | 28.37   |
| Q9H4L5-3                   | OSBL3_HUMAN Isoform 1c of Oxysterol-binding protein-related protein 3 OS=Homo sapiens GN=OSBPL3                                            |           | 28.37   |
| Q9H4L5-4                   | OSBL3_HUMAN Isoform 1d of Oxysterol-binding protein-related protein 3 OS=Homo sapiens GN=OSBPL3                                            |           | 28.37   |
| Q9H4L5-5                   | OSBL3_HUMAN Isoform 2a of Oxysterol-binding protein-related protein 3 OS=Homo sapiens GN=OSBPL3                                            |           |         |
| Q9H4L5-6                   | OSBL3_HUMAN Isoform 2b of Oxysterol-binding protein-related protein 3 OS=Homo sapiens GN=OSBPL3                                            |           |         |
| Q9H4L5-7                   | OSBL3_HUMAN Isoform 2c of Oxysterol-binding protein-related protein 3 OS=Homo sapiens GN=OSBPL3                                            |           |         |
| Q9H4L5-8                   | OSBL3_HUMAN Isoform 2d of Oxysterol-binding protein-related protein 3 OS=Homo sapiens GN=OSBPL3                                            |           |         |
| Q9H4L5;Q9H4L5-2;Q9H4L5-2   | OSBL3_HUMAN Oxysterol-binding protein-related protein 3 OS=Homo sapiens GN=OSBPL3 PE=1 SV=1;>sp Q9H4L5-2 OSBL3_HUMAN                       | 1.65E-91  |         |
| Q9H4L7                     | SMRCD_HUMAN SWI/SNF-related matrix-associated actin-dependent regulator of chromatin subfamily A containing DEAD/H box 1 OS=Homo sapiens   |           | 51.74   |
| Q9H4L7-2                   | SMRCD_HUMAN Isoform 2 of SWI/SNF-related matrix-associated actin-dependent regulator of chromatin subfamily A containing DEAD/H box 1 OS=H |           | 51.74   |
| Q9H4L7-2;Q9H4L7            | 2 SMRCD_HUMAN Isoform 2 of SWI/SNF-related matrix-associated actin-dependent regulator of chromatin subfamily A containing DE/             | 9.22E-06  |         |
| Q9H4M9                     | EHD1_HUMAN EH domain-containing protein 1 OS=Homo sapiens GN=EHD1 PE=1 SV=2                                                                |           | 1145.06 |
| Q9H4T2                     | ZSC16_HUMAN Zinc finger and SCAN domain-containing protein 16 OS=Homo sapiens GN=ZSCAN16 PE=1 SV=2                                         |           |         |
| Q9H4Z3                     | PCIF1_HUMAN Phosphorylated CTD-interacting factor 1 OS=Homo sapiens GN=PCIF1 PE=1 SV=1                                                     |           | 17.76   |
| Q9H501                     | ESF1_HUMAN ESF1 homolog OS=Homo sapiens GN=ESF1 PE=1 SV=1                                                                                  |           | 44.39   |
| Q9H553                     | ALG2_HUMAN Alpha-1,3/1,6-mannosyltransferase ALG2 OS=Homo sapiens GN=ALG2 PE=2 SV=1                                                        |           |         |
| Q9H553-2                   | ALG2_HUMAN Isoform 2 of Alpha-1,3/1,6-mannosyltransferase ALG2 OS=Homo sapiens GN=ALG2                                                     |           |         |
| Q9H553;Q9H553-2            | ALG2_HUMAN Alpha-1,3/1,6-mannosyltransferase ALG2 OS=Homo sapiens GN=ALG2 PE=2 SV=1;>sp Q9H553-2 ALG2_HUMAN Isofo                          | 1.58E-10  |         |
| Q9H579                     | CT132_HUMAN Uncharacterized protein C20orf132 OS=Homo sapiens GN=C20orf132 PE=2 SV=2                                                       |           |         |
| Q9H579-2                   | CT132_HUMAN Isoform 2 of Uncharacterized protein C20orf132 OS=Homo sapiens GN=C20orf132                                                    |           | 34.46   |
| Q9H583                     | HEAT1_HUMAN HEAT repeat-containing protein 1 OS=Homo sapiens GN=HEATR1 PE=1 SV=3                                                           |           |         |
| Q9H5N1                     | RABE2_HUMAN Rab GTPase-binding effector protein 2 OS=Homo sapiens GN=RABEP2 PE=1 SV=2                                                      |           |         |
| Q9H5N1-2                   | RABE2_HUMAN Isoform 2 of Rab GTPase-binding effector protein 2 OS=Homo sapiens GN=RABEP2                                                   |           |         |
| Q9H5Q4                     | TFB2M_HUMAN Dimethyladenosine transferase 2, mitochondrial OS=Homo sapiens GN=TFB2M PE=1 SV=1                                              | 2.18E-08  |         |
| Q9H5V8                     | CDCP1_HUMAN CUB domain-containing protein 1 OS=Homo sapiens GN=CDCP1 PE=1 SV=3                                                             |           | 178.16  |

|                        |                                                                                                                          |            |        |
|------------------------|--------------------------------------------------------------------------------------------------------------------------|------------|--------|
| Q9H5V8-2               | CDCP1_HUMAN Isoform 2 of CUB domain-containing protein 1 OS=Homo sapiens GN=CDCP1                                        |            | 146.15 |
| Q9H5V8-3               | CDCP1_HUMAN Isoform 3 of CUB domain-containing protein 1 OS=Homo sapiens GN=CDCP1                                        |            | 75.33  |
| Q9H5V8;Q9H5V8-2        | CDCP1_HUMAN CUB domain-containing protein 1 OS=Homo sapiens GN=CDCP1 PE=1 SV=3;>sp Q9H5V8-2 CDCP1_HUMAN Isoform          | 3.77E-08   |        |
| Q9H5V9                 | CX056_HUMAN UPF0428 protein CXorf56 OS=Homo sapiens GN=CXorf56 PE=1 SV=1                                                 | 2.04E-05   |        |
| Q9H5X1                 | FA96A_HUMAN MIP18 family protein FAM96A OS=Homo sapiens GN=FAM96A PE=1 SV=1                                              | 7.17E-06   |        |
| Q9H6D7;Q9H6D7-4;Q9H6F5 | HAUS4_HUMAN HAUS augmin-like complex subunit 4 OS=Homo sapiens GN=HAUS4 PE=1 SV=1;>sp Q9H6D7-4 HAUS4_HUMAN Isofo         | 2.55E-10   |        |
| Q9H6K4                 | CCD86_HUMAN Coiled-coil domain-containing protein 86 OS=Homo sapiens GN=CCDC86 PE=1 SV=1                                 |            |        |
| Q9H6K4                 | OPA3_HUMAN Optic atrophy 3 protein OS=Homo sapiens GN=OPA3 PE=1 SV=1                                                     |            | 24.06  |
| Q9H6K4-2               | OPA3_HUMAN Isoform 2 of Optic atrophy 3 protein OS=Homo sapiens GN=OPA3                                                  |            | 24.06  |
| Q9H6P5                 | TASP1_HUMAN Threonine aspartase 1 OS=Homo sapiens GN=TASP1 PE=1 SV=1                                                     |            |        |
| Q9H6R4                 | NOL6_HUMAN Nucleolar protein 6 OS=Homo sapiens GN=NOL6 PE=1 SV=2                                                         |            |        |
| Q9H6R4-2               | NOL6_HUMAN Isoform 2 of Nucleolar protein 6 OS=Homo sapiens GN=NOL6                                                      |            |        |
| Q9H6R4-3               | NOL6_HUMAN Isoform 3 of Nucleolar protein 6 OS=Homo sapiens GN=NOL6                                                      |            |        |
| Q9H6R4-4               | NOL6_HUMAN Isoform 4 of Nucleolar protein 6 OS=Homo sapiens GN=NOL6                                                      |            |        |
| Q9H6R4;Q9H6R4-4;B4DF6  | NOL6_HUMAN Nucleolar protein 6 OS=Homo sapiens GN=NOL6 PE=1 SV=2;>sp Q9H6R4-4 NOL6_HUMAN Isoform 4 of Nucleolar prot     | 7.48E-12   |        |
| Q9H6S0                 | YTDC2_HUMAN Probable ATP-dependent RNA helicase YTHDC2 OS=Homo sapiens GN=YTHDC2 PE=1 SV=2                               |            | 72.83  |
| Q9H6S3                 | ES8L2_HUMAN Epidermal growth factor receptor kinase substrate 8-like protein 2 OS=Homo sapiens GN=EPS8L2 PE=1 SV=2       | 6.58E-18   |        |
| Q9H6T0                 | ESRP2_HUMAN Epithelial splicing regulatory protein 2 OS=Homo sapiens GN=ESRP2 PE=1 SV=1                                  |            | 37.7   |
| Q9H6T0-2               | ESRP2_HUMAN Isoform 2 of Epithelial splicing regulatory protein 2 OS=Homo sapiens GN=ESRP2                               |            | 37.7   |
| Q9H6T0;Q9H6T0-2;Q6NXE  | ESRP2_HUMAN Epithelial splicing regulatory protein 2 OS=Homo sapiens GN=ESRP2 PE=1 SV=1;>sp Q9H6T0-2 ESRP2_HUMAN Isofo   | 2.84E-07   |        |
| Q9H6T3;Q9H6T3-2        | RPAP3_HUMAN RNA polymerase II-associated protein 3 OS=Homo sapiens GN=RPAP3 PE=1 SV=2;>sp Q9H6T3-2 RPAP3_HUMAN Isof      | 1.46E-11   |        |
| Q9H6V9                 | CB043_HUMAN UPF0554 protein C2orf43 OS=Homo sapiens GN=C2orf43 PE=1 SV=1                                                 |            |        |
| Q9H6Y2                 | WDR55_HUMAN WD repeat-containing protein 55 OS=Homo sapiens GN=WDR55 PE=1 SV=2                                           | 2.07E-14   |        |
| Q9H6Z4                 | RANB3_HUMAN Ran-binding protein 3 OS=Homo sapiens GN=RANBP3 PE=1 SV=1                                                    |            |        |
| Q9H6Z4-2               | RANB3_HUMAN Isoform 2 of Ran-binding protein 3 OS=Homo sapiens GN=RANBP3                                                 |            |        |
| Q9H6Z4-2;Q9H6Z4;Q9H6Z  | 2 RANB3_HUMAN Isoform 2 of Ran-binding protein 3 OS=Homo sapiens GN=RANBP3;>sp Q9H6Z4 RANB3_HUMAN Ran-binding prote      | 2.79E-43   |        |
| Q9H6Z4-3               | RANB3_HUMAN Isoform 3 of Ran-binding protein 3 OS=Homo sapiens GN=RANBP3                                                 |            |        |
| Q9H6Z4-4               | RANB3_HUMAN Isoform 4 of Ran-binding protein 3 OS=Homo sapiens GN=RANBP3                                                 |            |        |
| Q9H6Z4;Q9H6Z4-2;Q53GI  | RANB3_HUMAN Ran-binding protein 3 OS=Homo sapiens GN=RANBP3 PE=1 SV=1;>sp Q9H6Z4-2 RANB3_HUMAN Isoform 2 of Ran-b        | 4.26E-53   |        |
| Q9H773                 | DCTP1_HUMAN dCTP pyrophosphatase 1 OS=Homo sapiens GN=DCTPP1 PE=1 SV=1                                                   |            |        |
| Q9H7B2                 | RPF2_HUMAN Ribosome production factor 2 homolog OS=Homo sapiens GN=RPF2 PE=1 SV=2                                        |            | 29.37  |
| Q9H7B4;Q9H7B4-3;Q9H7I  | SMYD3_HUMAN SET and MYND domain-containing protein 3 OS=Homo sapiens GN=SMYD3 PE=1 SV=4;>sp Q9H7B4-3 SMYD3_HUM/          | 1.70E-08   |        |
| Q9H7C9                 | CK067_HUMAN UPF0366 protein C11orf67 OS=Homo sapiens GN=C11orf67 PE=1 SV=1                                               | 4.71E-08   |        |
| Q9H7D0                 | DOCK5_HUMAN Deducator of cytokinesis protein 5 OS=Homo sapiens GN=DOCK5 PE=1 SV=3                                        | 1.85E-05   |        |
| Q9H7D7;Q9H7D7-2        | WDR26_HUMAN WD repeat-containing protein 26 OS=Homo sapiens GN=WDR26 PE=1 SV=3;>sp Q9H7D7-2 WDR26_HUMAN Isoform          | 1.94E-34   |        |
| Q9H7E9-2;Q9H7E9        | 2 CH033_HUMAN Isoform 2 of UPF0488 protein C8orf33 OS=Homo sapiens GN=C8orf33;>sp Q9H7E9 CH033_HUMAN UPF0488 protei      | 1.39E-11   |        |
| Q9H7Z7                 | PGES2_HUMAN Prostaglandin E synthase 2 OS=Homo sapiens GN=PTGES2 PE=1 SV=1                                               |            | 88.47  |
| Q9H814                 | PHAX_HUMAN Phosphorylated adapter RNA export protein OS=Homo sapiens GN=PHAX PE=1 SV=1                                   |            | 34.22  |
| Q9H819                 | DJC18_HUMAN DnaJ homolog subfamily C member 18 OS=Homo sapiens GN=DNAJC18 PE=2 SV=1                                      |            |        |
| Q9H832;D3DTW2;B4DL66   | UBE2Z_HUMAN Ubiquitin-conjugating enzyme E2 Z OS=Homo sapiens GN=UBE2Z PE=1 SV=2;>tr D3DTW2 D3DTW2_HUMAN Ubiquit         | 7.81E-19   |        |
| Q9H845                 | ACAD9_HUMAN Acyl-CoA dehydrogenase family member 9, mitochondrial OS=Homo sapiens GN=ACAD9 PE=1 SV=1                     |            | 171.31 |
| Q9H853                 | TBA4B_HUMAN Putative tubulin-like protein alpha-4B OS=Homo sapiens GN=TUBA4B PE=5 SV=2                                   |            | 198.08 |
| Q9H857;Q9H857-2;Q9H8   | NT5D2_HUMAN 5-nucleotidase domain-containing protein 2 OS=Homo sapiens GN=NT5DC2 PE=1 SV=1;>sp Q9H857-2 NT5D2_HUM/       | 4.85E-05   |        |
| Q9H871                 | RMD5A_HUMAN Protein RMD5 homolog A OS=Homo sapiens GN=RMND5A PE=1 SV=1                                                   |            |        |
| Q9H871-2               | RMD5A_HUMAN Isoform 2 of Protein RMD5 homolog A OS=Homo sapiens GN=RMND5A                                                |            |        |
| Q9H8G2                 | CI082_HUMAN Uncharacterized protein C9orf82 OS=Homo sapiens GN=C9orf82 PE=1 SV=2                                         | 2.42E-05   |        |
| Q9H8H0                 | NOL11_HUMAN Nucleolar protein 11 OS=Homo sapiens GN=NOL11 PE=1 SV=1                                                      |            |        |
| Q9H8H2                 | DDX31_HUMAN Probable ATP-dependent RNA helicase DDX31 OS=Homo sapiens GN=DDX31 PE=1 SV=2                                 |            |        |
| Q9H8H2-2               | DDX31_HUMAN Isoform 2 of Probable ATP-dependent RNA helicase DDX31 OS=Homo sapiens GN=DDX31                              |            |        |
| Q9H8H2-3               | DDX31_HUMAN Isoform 3 of Probable ATP-dependent RNA helicase DDX31 OS=Homo sapiens GN=DDX31                              |            |        |
| Q9H8H2-4               | DDX31_HUMAN Isoform 4 of Probable ATP-dependent RNA helicase DDX31 OS=Homo sapiens GN=DDX31                              |            |        |
| Q9H8H3                 | MET7A_HUMAN Methyltransferase-like protein 7A OS=Homo sapiens GN=METT7A PE=1 SV=1                                        |            |        |
| Q9H8M9                 | F176A_HUMAN Protein FAM176A OS=Homo sapiens GN=FAM176A PE=2 SV=1                                                         |            | 49.96  |
| Q9H8T0-2;Q9H8T0        | 2 AKTIP_HUMAN Isoform 2 of AKT-interacting protein OS=Homo sapiens GN=AKTIP;>sp Q9H8T0 AKTIP_HUMAN AKT-interacting prote | 5.65E-08   |        |
| Q9H8U3                 | ZFAN3_HUMAN AN1-type zinc finger protein 3 OS=Homo sapiens GN=ZFAND3 PE=1 SV=1                                           | 0.00015016 |        |
| Q9H8Y5                 | ANKZ1_HUMAN Ankyrin repeat and zinc finger domain-containing protein 1 OS=Homo sapiens GN=ANKZF1 PE=1 SV=1               |            |        |
| Q9H8Y8                 | GORS2_HUMAN Golgi reassembly-stacking protein 2 OS=Homo sapiens GN=GORASP2 PE=1 SV=3                                     | 2.39E-18   |        |
| Q9H900;A8K4T3;Q9H900-  | ZWILC_HUMAN Protein zwilch homolog OS=Homo sapiens GN=ZWILCH PE=1 SV=2;>tr A8K4T3 A8K4T3_HUMAN cDNA FLJ77716, hig        | 1.87E-11   |        |
| Q9H910                 | HN1L_HUMAN Hematological and neurological expressed 1-like protein OS=Homo sapiens GN=HN1L PE=1 SV=1                     |            | 92.53  |
| Q9H910-2               | HN1L_HUMAN Isoform 2 of Hematological and neurological expressed 1-like protein OS=Homo sapiens GN=HN1L                  |            | 92.53  |
| Q9H910;Q9H910-2        | HN1L_HUMAN Hematological and neurological expressed 1-like protein OS=Homo sapiens GN=HN1L PE=1 SV=1;>sp Q9H910-2 HN1L   | 1.27E-83   |        |



|                          |                                                                                                                           |            |          |
|--------------------------|---------------------------------------------------------------------------------------------------------------------------|------------|----------|
| Q9H930                   | LY10L_HUMAN Nuclear body protein SP140-like protein OS=Homo sapiens GN=SP140L PE=2 SV=2                                   |            | 60.37    |
| Q9H930-2                 | LY10L_HUMAN Isoform 2 of Nuclear body protein SP140-like protein OS=Homo sapiens GN=SP140L                                |            | 60.37    |
| Q9H930-3                 | LY10L_HUMAN Isoform 3 of Nuclear body protein SP140-like protein OS=Homo sapiens GN=SP140L                                |            | 47.51    |
| Q9H930-4                 | LY10L_HUMAN Isoform 4 of Nuclear body protein SP140-like protein OS=Homo sapiens GN=SP140L                                |            | 60.62    |
| Q9H930-4;Q9H930;Q9H936   | LY10L_HUMAN Isoform 4 of Nuclear body protein SP140-like protein OS=Homo sapiens GN=SP140L;>sp Q9H930 LY10L_HUMAN Nu      | 6.15E-10   |          |
| Q9H936                   | GHC1_HUMAN Mitochondrial glutamate carrier 1 OS=Homo sapiens GN=SLC25A22 PE=1 SV=1                                        |            | 82.42    |
| Q9H939;Q9H939-2          | PPIP2_HUMAN Proline-serine-threonine phosphatase-interacting protein 2 OS=Homo sapiens GN=PSTPIP2 PE=1 SV=4;>sp Q9H939-2  | 0.00018216 |          |
| Q9H943                   | CJ068_HUMAN Uncharacterized protein C10orf68 OS=Homo sapiens GN=C10orf68 PE=2 SV=2                                        |            |          |
| Q9H943-2                 | CJ068_HUMAN Isoform 2 of Uncharacterized protein C10orf68 OS=Homo sapiens GN=C10orf68                                     |            |          |
| Q9H943-3                 | CJ068_HUMAN Isoform 3 of Uncharacterized protein C10orf68 OS=Homo sapiens GN=C10orf68                                     |            |          |
| Q9H944                   | MED20_HUMAN Mediator of RNA polymerase II transcription subunit 20 OS=Homo sapiens GN=MED20 PE=1 SV=1                     |            | 62.38    |
| Q9H974                   | QTRD1_HUMAN Queuine tRNA-ribosyltransferase subunit QTRD1 OS=Homo sapiens GN=QTRD1 PE=1 SV=1                              | 3.23E-06   |          |
| Q9H993                   | CF211_HUMAN UPF0364 protein C6orf211 OS=Homo sapiens GN=C6orf211 PE=1 SV=1                                                | 2.01E-280  |          |
| Q9H9A5;Q9H9A5-2;Q9H9A6   | CNOTA_HUMAN CCR4-NOT transcription complex subunit 10 OS=Homo sapiens GN=CNOT10 PE=1 SV=1;>sp Q9H9A5-2 CNOTA_HUM          | 2.94E-13   |          |
| Q9H9A6                   | LRC40_HUMAN Leucine-rich repeat-containing protein 40 OS=Homo sapiens GN=LRR40 PE=1 SV=1                                  |            | 43.74    |
| Q9H9B1                   | EHMT1_HUMAN Histone-lysine N-methyltransferase EHMT1 OS=Homo sapiens GN=EHMT1 PE=1 SV=4                                   |            |          |
| Q9H9B1-2                 | EHMT1_HUMAN Isoform 2 of Histone-lysine N-methyltransferase EHMT1 OS=Homo sapiens GN=EHMT1                                |            |          |
| Q9H9B1-3                 | EHMT1_HUMAN Isoform 3 of Histone-lysine N-methyltransferase EHMT1 OS=Homo sapiens GN=EHMT1                                |            |          |
| Q9H9B1-4                 | EHMT1_HUMAN Isoform 4 of Histone-lysine N-methyltransferase EHMT1 OS=Homo sapiens GN=EHMT1                                |            |          |
| Q9H9B4                   | SFXN1_HUMAN Sideroflexin-1 OS=Homo sapiens GN=SFXN1 PE=1 SV=4                                                             |            | 454.07   |
| Q9H9F9                   | ARP5_HUMAN Actin-related protein 5 OS=Homo sapiens GN=ACTR5 PE=1 SV=2                                                     |            | 39.39    |
| Q9H9H4                   | VP37B_HUMAN Vacuolar protein sorting-associated protein 37B OS=Homo sapiens GN=VPS37B PE=1 SV=1                           |            | 186.41   |
| Q9H9J2                   | RM44_HUMAN 39S ribosomal protein L44, mitochondrial OS=Homo sapiens GN=MRPL44 PE=1 SV=1                                   |            | 164.31   |
| Q9H9P8                   | L2HDH_HUMAN L-2-hydroxyglutarate dehydrogenase, mitochondrial OS=Homo sapiens GN=L2HGDH PE=1 SV=3                         |            |          |
| Q9H9P8-2                 | L2HDH_HUMAN Isoform 2 of L-2-hydroxyglutarate dehydrogenase, mitochondrial OS=Homo sapiens GN=L2HGDH                      |            |          |
| Q9H9P8;Q9H9P8-2          | L2HDH_HUMAN L-2-hydroxyglutarate dehydrogenase, mitochondrial OS=Homo sapiens GN=L2HGDH PE=1 SV=3;>sp Q9H9P8-2 L2H        | 4.64E-22   |          |
| Q9H9Q2;Q9H9Q2-2;Q9H9S3   | CSN7B_HUMAN COP9 signalosome complex subunit 7b OS=Homo sapiens GN=COPS7B PE=1 SV=1;>sp Q9H9Q2-2 CSN7B_HUMAN I            | 5.04E-67   |          |
| Q9H9S3                   | S61A2_HUMAN Protein transport protein Sec61 subunit alpha isoform 2 OS=Homo sapiens GN=SEC61A2 PE=2 SV=3                  |            | 67.52    |
| Q9H9S3-2                 | S61A2_HUMAN Isoform 2 of Protein transport protein Sec61 subunit alpha isoform 2 OS=Homo sapiens GN=SEC61A2               |            | 74.15    |
| Q9H9S4                   | CB39L_HUMAN Calcium-binding protein 39-like OS=Homo sapiens GN=CAB39L PE=1 SV=3                                           |            | 64.76    |
| Q9H9T3                   | ELP3_HUMAN Elongator complex protein 3 OS=Homo sapiens GN=ELP3 PE=1 SV=2                                                  |            |          |
| Q9H9T3-2                 | ELP3_HUMAN Isoform 2 of Elongator complex protein 3 OS=Homo sapiens GN=ELP3                                               |            |          |
| Q9H9T3;Q9H9T3-2;E2QR1    | ELP3_HUMAN Elongator complex protein 3 OS=Homo sapiens GN=ELP3 PE=1 SV=2;>sp Q9H9T3-2 ELP3_HUMAN Isoform 2 of Elonga      | 1.08E-07   |          |
| Q9H9Y2                   | RPF1_HUMAN Ribosome production factor 1 OS=Homo sapiens GN=RPF1 PE=1 SV=2                                                 |            |          |
| Q9H9Y6                   | RPA2_HUMAN DNA-directed RNA polymerase I subunit RPA2 OS=Homo sapiens GN=POLR1B PE=1 SV=2                                 |            |          |
| Q9H9Y6-2                 | RPA2_HUMAN Isoform 2 of DNA-directed RNA polymerase I subunit RPA2 OS=Homo sapiens GN=POLR1B                              |            |          |
| Q9H9Y6;Q9H9Y6-2          | RPA2_HUMAN DNA-directed RNA polymerase I subunit RPA2 OS=Homo sapiens GN=POLR1B PE=1 SV=2;>sp Q9H9Y6-2 RPA2_HUMAI         | 7.73E-19   |          |
| Q9HA26                   | RUN2A_HUMAN RUN domain-containing protein 2A OS=Homo sapiens GN=RUNDC2A PE=2 SV=2                                         |            |          |
| Q9HA64                   | KT3K_HUMAN Ketosamine-3-kinase OS=Homo sapiens GN=FN3KRP PE=1 SV=2                                                        |            | 2.50E-11 |
| Q9HA77                   | SYCM_HUMAN Probable cysteinyl-tRNA synthetase, mitochondrial OS=Homo sapiens GN=CARS2 PE=1 SV=1                           |            |          |
| Q9HA92                   | RSAD1_HUMAN Radical S-adenosyl methionine domain-containing protein 1, mitochondrial OS=Homo sapiens GN=RSAD1 PE=2 SV=2   |            |          |
| Q9HAB8                   | PPCS_HUMAN Phosphopantothenate--cysteine ligase OS=Homo sapiens GN=PPCS PE=1 SV=2                                         | 3.38E-20   |          |
| Q9HAN9                   | NMNA1_HUMAN Nicotinamide mononucleotide adenylyltransferase 1 OS=Homo sapiens GN=NMNAT1 PE=1 SV=1                         |            | 113.37   |
| Q9HAP6                   | LIN7B_HUMAN Protein lin-7 homolog B OS=Homo sapiens GN=LIN7B PE=1 SV=1                                                    |            | 69.25    |
| Q9HAR2                   | LPHN3_HUMAN Latrophilin-3 OS=Homo sapiens GN=LPHN3 PE=1 SV=2                                                              |            |          |
| Q9HAR2-2                 | LPHN3_HUMAN Isoform 2 of Latrophilin-3 OS=Homo sapiens GN=LPHN3                                                           |            |          |
| Q9HAR2-3                 | LPHN3_HUMAN Isoform 3 of Latrophilin-3 OS=Homo sapiens GN=LPHN3                                                           |            |          |
| Q9HAS0                   | NJMU_HUMAN Protein Njmu-R1 OS=Homo sapiens GN=C17orf75 PE=1 SV=2                                                          |            | 1.15E-09 |
| Q9HAT2;Q9HAT2-2          | SIAE_HUMAN Sialate O-acetyltransferase OS=Homo sapiens GN=SIAE PE=1 SV=1;>sp Q9HAT2-2 SIAE_HUMAN Isoform 2 of Sialate O-a | 1.37E-32   |          |
| Q9HAU0-4;Q9HAU0-2;Q9H9F4 | PKHA5_HUMAN Isoform 4 of Pleckstrin homology domain-containing family A member 5 OS=Homo sapiens GN=PLEKHA5;>sp Q9H9F4    | 5.44E-06   |          |
| Q9HAU5                   | RENT2_HUMAN Regulator of nonsense transcripts 2 OS=Homo sapiens GN=UPF2 PE=1 SV=1                                         |            |          |
| Q9HAU5-2                 | RENT2_HUMAN Isoform 2 of Regulator of nonsense transcripts 2 OS=Homo sapiens GN=UPF2                                      |            |          |
| Q9HAU8                   | RNPL1_HUMAN Arginyl aminopeptidase-like 1 OS=Homo sapiens GN=RNPEPL1 PE=2 SV=2                                            |            |          |
| Q9HAV0                   | GBB4_HUMAN Guanine nucleotide-binding protein subunit beta-4 OS=Homo sapiens GN=GNB4 PE=1 SV=3                            |            | 217.73   |
| Q9HAV4                   | XPO5_HUMAN Exportin-5 OS=Homo sapiens GN=XPO5 PE=1 SV=1                                                                   |            | 324.16   |
| Q9HAV7                   | GRPE1_HUMAN GrpE protein homolog 1, mitochondrial OS=Homo sapiens GN=GRPEL1 PE=1 SV=2                                     |            | 462.73   |
| Q9HAW4                   | CLSPN_HUMAN Claspin OS=Homo sapiens GN=CLSPN PE=1 SV=3                                                                    |            |          |
| Q9HAW4-2                 | CLSPN_HUMAN Isoform 2 of Claspin OS=Homo sapiens GN=CLSPN                                                                 |            |          |
| Q9HAW4-3                 | CLSPN_HUMAN Isoform 3 of Claspin OS=Homo sapiens GN=CLSPN                                                                 |            |          |
| Q9HAZ2                   | PRD16_HUMAN PR domain zinc finger protein 16 OS=Homo sapiens GN=PRDM16 PE=1 SV=3                                          |            |          |
| Q9HAZ2-2                 | PRD16_HUMAN Isoform 2 of PR domain zinc finger protein 16 OS=Homo sapiens GN=PRDM16                                       |            |          |

|                        |                                                                                                                       |           |        |
|------------------------|-----------------------------------------------------------------------------------------------------------------------|-----------|--------|
| Q9HAZ2-3               | PRD16_HUMAN Isoform 3 of PR domain zinc finger protein 16 OS=Homo sapiens GN=PRDM16                                   |           |        |
| Q9HAZ2-4               | PRD16_HUMAN Isoform 4 of PR domain zinc finger protein 16 OS=Homo sapiens GN=PRDM16                                   |           |        |
| Q9HB07                 | MYG1_HUMAN UPF0160 protein MYG1, mitochondrial OS=Homo sapiens GN=C12orf10 PE=1 SV=2                                  | 1.25E-27  |        |
| Q9HB19                 | PKHA2_HUMAN Pleckstrin homology domain-containing family A member 2 OS=Homo sapiens GN=PLEKHA2 PE=1 SV=2              | 7.17E-08  |        |
| Q9HB40;B4DP22;Q9HB40   | RISC_HUMAN Retinoid-inducible serine carboxypeptidase OS=Homo sapiens GN=SCPEP1 PE=1 SV=1;>tr B4DP22 B4DP22_HUMAN c   | 2.90E-37  |        |
| Q9HB58                 | SP110_HUMAN Sp110 nuclear body protein OS=Homo sapiens GN=SP110 PE=1 SV=5                                             |           | 19.41  |
| Q9HB58-2               | SP110_HUMAN Isoform 2 of Sp110 nuclear body protein OS=Homo sapiens GN=SP110                                          |           | 17.51  |
| Q9HB58-3               | SP110_HUMAN Isoform 3 of Sp110 nuclear body protein OS=Homo sapiens GN=SP110                                          |           | 2.15   |
| Q9HB58-4               | SP110_HUMAN Isoform 4 of Sp110 nuclear body protein OS=Homo sapiens GN=SP110                                          |           | 0.25   |
| Q9HB58-5               | SP110_HUMAN Isoform 5 of Sp110 nuclear body protein OS=Homo sapiens GN=SP110                                          |           | 2.15   |
| Q9HB58-6               | SP110_HUMAN Isoform 6 of Sp110 nuclear body protein OS=Homo sapiens GN=SP110                                          |           | 19.41  |
| Q9HB71                 | CYBP_HUMAN Calcyclin-binding protein OS=Homo sapiens GN=CACYBP PE=1 SV=2                                              |           | 495.59 |
| Q9HB71-2               | CYBP_HUMAN Isoform 2 of Calcyclin-binding protein OS=Homo sapiens GN=CACYBP                                           |           | 22.91  |
| Q9HB90;B4DQG4;D3DPT8   | RRAGC_HUMAN Ras-related GTP-binding protein C OS=Homo sapiens GN=RRAGC PE=1 SV=1;>tr B4DQG4 B4DQG4_HUMAN cDNA FI      | 9.83E-11  |        |
| Q9HBA0                 | TRPV4_HUMAN Transient receptor potential cation channel subfamily V member 4 OS=Homo sapiens GN=TRPV4 PE=1 SV=2       |           |        |
| Q9HBA0-2               | TRPV4_HUMAN Isoform 2 of Transient receptor potential cation channel subfamily V member 4 OS=Homo sapiens GN=TRPV4    |           |        |
| Q9HBA0-3               | TRPV4_HUMAN Isoform 3 of Transient receptor potential cation channel subfamily V member 4 OS=Homo sapiens GN=TRPV4    |           |        |
| Q9HBA0-4               | TRPV4_HUMAN Isoform 4 of Transient receptor potential cation channel subfamily V member 4 OS=Homo sapiens GN=TRPV4    |           |        |
| Q9HBA0-5               | TRPV4_HUMAN Isoform 5 of Transient receptor potential cation channel subfamily V member 4 OS=Homo sapiens GN=TRPV4    |           |        |
| Q9HBA0-6               | TRPV4_HUMAN Isoform 6 of Transient receptor potential cation channel subfamily V member 4 OS=Homo sapiens GN=TRPV4    |           |        |
| Q9HBA9                 | FOH1B_HUMAN Putative N-acetylated-alpha-linked acidic dipeptidase OS=Homo sapiens GN=FOLH1B PE=2 SV=1                 |           |        |
| Q9HBE1                 | PATZ1_HUMAN POZ-, AT hook-, and zinc finger-containing protein 1 OS=Homo sapiens GN=PATZ1 PE=1 SV=1                   |           |        |
| Q9HBE1-2               | PATZ1_HUMAN Isoform 2 of POZ-, AT hook-, and zinc finger-containing protein 1 OS=Homo sapiens GN=PATZ1                |           |        |
| Q9HBE1-3               | PATZ1_HUMAN Isoform 3 of POZ-, AT hook-, and zinc finger-containing protein 1 OS=Homo sapiens GN=PATZ1                |           |        |
| Q9HBE1-4               | PATZ1_HUMAN Isoform 4 of POZ-, AT hook-, and zinc finger-containing protein 1 OS=Homo sapiens GN=PATZ1                |           |        |
| Q9HBG4                 | VPP4_HUMAN V-type proton ATPase 116 kDa subunit a isoform 4 OS=Homo sapiens GN=ATP6V0A4 PE=1 SV=2                     |           |        |
| Q9HBH5                 | RDH14_HUMAN Retinol dehydrogenase 14 OS=Homo sapiens GN=RDH14 PE=1 SV=1                                               |           |        |
| Q9HBI0;Q9HBI0-2;Q9HBI1 | PARVG_HUMAN Gamma-parvin OS=Homo sapiens GN=PARVG PE=2 SV=1;>sp Q9HBI0-2 PARVG_HUMAN Isoform 2 of Gamma-parvir        | 1.22E-37  |        |
| Q9HBI1                 | PARVB_HUMAN Beta-parvin OS=Homo sapiens GN=PARVB PE=1 SV=1                                                            |           | 37.37  |
| Q9HBI1-2               | PARVB_HUMAN Isoform 2 of Beta-parvin OS=Homo sapiens GN=PARVB                                                         |           | 37.37  |
| Q9HBI6                 | CP4FB_HUMAN Cytochrome P450 4F11 OS=Homo sapiens GN=CYP4F11 PE=2 SV=3                                                 | 6.88E-09  |        |
| Q9HBL0                 | TENS1_HUMAN Tensin-1 OS=Homo sapiens GN=TNS1 PE=1 SV=2                                                                | 2.89E-06  |        |
| Q9HBL7                 | CI046_HUMAN Transmembrane protein C9orf46 OS=Homo sapiens GN=C9orf46 PE=2 SV=1                                        | 2.32E-15  |        |
| Q9HBM0-2               | VEZA_HUMAN Isoform 2 of Vezatin OS=Homo sapiens GN=VEZT                                                               |           | 18.13  |
| Q9HBM1                 | SPC25_HUMAN Kinetochore protein Spc25 OS=Homo sapiens GN=SPC25 PE=1 SV=1                                              | 4.43E-32  |        |
| Q9HBM6                 | TAF9B_HUMAN Transcription initiation factor TFIID subunit 9B OS=Homo sapiens GN=TAF9B PE=1 SV=1                       |           | 118.03 |
| Q9HBT7                 | ZN287_HUMAN Zinc finger protein 287 OS=Homo sapiens GN=ZNF287 PE=2 SV=1                                               |           |        |
| Q9HBT8                 | Z286A_HUMAN Zinc finger protein 286A OS=Homo sapiens GN=ZNF286A PE=2 SV=1                                             |           | 1.46   |
| Q9HBX8                 | LGR6_HUMAN Leucine-rich repeat-containing G-protein coupled receptor 6 OS=Homo sapiens GN=LGR6 PE=1 SV=3              |           | 18.09  |
| Q9HBX8-1               | LGR6_HUMAN Isoform 1 of Leucine-rich repeat-containing G-protein coupled receptor 6 OS=Homo sapiens GN=LGR6           |           | 18.09  |
| Q9HBX8-2               | LGR6_HUMAN Isoform 2 of Leucine-rich repeat-containing G-protein coupled receptor 6 OS=Homo sapiens GN=LGR6           |           | 18.09  |
| Q9HC07                 | TM165_HUMAN Transmembrane protein 165 OS=Homo sapiens GN=TMEM165 PE=1 SV=1                                            | 1.50E-66  |        |
| Q9HC16                 | ABC3G_HUMAN DNA dC->dU-editing enzyme APOBEC-3G OS=Homo sapiens GN=APOBEC3G PE=1 SV=1                                 | 4.10E-06  |        |
| Q9HC35                 | EMAL4_HUMAN Echinoderm microtubule-associated protein-like 4 OS=Homo sapiens GN=EML4 PE=1 SV=3                        |           | 24.55  |
| Q9HC36                 | RMTL1_HUMAN RNA methyltransferase-like protein 1 OS=Homo sapiens GN=RNMTL1 PE=1 SV=2                                  | 1.07E-12  |        |
| Q9HC38                 | GLOD4_HUMAN Glyoxalase domain-containing protein 4 OS=Homo sapiens GN=GLOD4 PE=1 SV=1                                 |           | 60.83  |
| Q9HC38-2               | GLOD4_HUMAN Isoform 2 of Glyoxalase domain-containing protein 4 OS=Homo sapiens GN=GLOD4                              |           | 60.83  |
| Q9HC38-2;Q9HC38        | 2 GLOD4_HUMAN Isoform 2 of Glyoxalase domain-containing protein 4 OS=Homo sapiens GN=GLOD4;>sp Q9HC38 GLOD4_HUMAN (   | 3.50E-62  |        |
| Q9HC38-3               | GLOD4_HUMAN Isoform 3 of Glyoxalase domain-containing protein 4 OS=Homo sapiens GN=GLOD4                              |           | 10.27  |
| Q9HC38;Q9HC38-2        | GLOD4_HUMAN Glyoxalase domain-containing protein 4 OS=Homo sapiens GN=GLOD4 PE=1 SV=1;>sp Q9HC38-2 GLOD4_HUMAN Is     | 3.26E-37  |        |
| Q9HC52                 | CBX8_HUMAN Chromobox protein homolog 8 OS=Homo sapiens GN=CBX8 PE=1 SV=3                                              |           |        |
| Q9HC62                 | SENP2_HUMAN Sentrin-specific protease 2 OS=Homo sapiens GN=SENP2 PE=1 SV=3                                            |           |        |
| Q9HC77                 | CENPJ_HUMAN Centromere protein J OS=Homo sapiens GN=CENPJ PE=1 SV=2                                                   |           |        |
| Q9HC98-2;Q9HC98-4;Q9H  | 2 NEK6_HUMAN Isoform 2 of Serine/threonine-protein kinase Nek6 OS=Homo sapiens GN=NEK6;>sp Q9HC98-4 NEK6_HUMAN Isofor | 1.61E-08  |        |
| Q9HCC0                 | MCCB_HUMAN Methylcrotonoyl-CoA carboxylase beta chain, mitochondrial OS=Homo sapiens GN=MCCC2 PE=1 SV=1               |           | 47.02  |
| Q9HCC0-2               | MCCB_HUMAN Isoform 2 of Methylcrotonoyl-CoA carboxylase beta chain, mitochondrial OS=Homo sapiens GN=MCCC2            |           | 47.02  |
| Q9HCC0;D6R932;Q9HCC0   | MCCB_HUMAN Methylcrotonoyl-CoA carboxylase beta chain, mitochondrial OS=Homo sapiens GN=MCCC2 PE=1 SV=1;>tr D6R932 D6 | 8.15E-181 |        |
| Q9HCD5                 | NCOA5_HUMAN Nuclear receptor coactivator 5 OS=Homo sapiens GN=NCOA5 PE=1 SV=2                                         |           |        |
| Q9HCE0                 | EPG5_HUMAN Ectopic P granules protein 5 homolog OS=Homo sapiens GN=EPG5 PE=2 SV=2                                     |           |        |
| Q9HCE0-2               | EPG5_HUMAN Isoform 2 of Ectopic P granules protein 5 homolog OS=Homo sapiens GN=EPG5                                  |           |        |
| Q9HCE0;Q9HCE0-2        | EPG5_HUMAN Ectopic P granules protein 5 homolog OS=Homo sapiens GN=EPG5 PE=2 SV=2;>sp Q9HCE0-2 EPG5_HUMAN Isoform 2   | 1.63E-17  |        |

|                      |                                                                                                                         |          |        |
|----------------------|-------------------------------------------------------------------------------------------------------------------------|----------|--------|
| Q9HCE1               | MOV10_HUMAN Putative helicase MOV-10 OS=Homo sapiens GN=MOV10 PE=1 SV=2                                                 |          |        |
| Q9HCE1-2             | MOV10_HUMAN Isoform 2 of Putative helicase MOV-10 OS=Homo sapiens GN=MOV10                                              |          |        |
| Q9HCE1;Q9HCE1-2      | MOV10_HUMAN Putative helicase MOV-10 OS=Homo sapiens GN=MOV10 PE=1 SV=2;>sp Q9HCE1-2 MOV10_HUMAN Isoform 2 of Pu        | 1.26E-09 |        |
| Q9HCE3               | ZN532_HUMAN Zinc finger protein 532 OS=Homo sapiens GN=ZNF532 PE=1 SV=2                                                 |          |        |
| Q9HCF4               | ALO17_HUMAN Protein ALO17 OS=Homo sapiens GN=KIAA1618 PE=1 SV=2                                                         |          |        |
| Q9HCF4-2             | ALO17_HUMAN Isoform 2 of Protein ALO17 OS=Homo sapiens GN=KIAA1618                                                      |          |        |
| Q9HCF4-3             | ALO17_HUMAN Isoform 3 of Protein ALO17 OS=Homo sapiens GN=KIAA1618                                                      |          |        |
| Q9HCF4-3;Q9HCF4      | 3 ALO17_HUMAN Isoform 3 of Protein ALO17 OS=Homo sapiens GN=KIAA1618;>sp Q9HCF4 ALO17_HUMAN Protein ALO17 OS=Hom        | 1.78E-29 |        |
| Q9HCF6               | TRPM3_HUMAN Transient receptor potential cation channel subfamily M member 3 OS=Homo sapiens GN=TRPM3 PE=2 SV=4         |          | 16.85  |
| Q9HCF6-11            | TRPM3_HUMAN Isoform 11 of Transient receptor potential cation channel subfamily M member 3 OS=Homo sapiens GN=TRPM3     |          | 39.49  |
| Q9HCF6-2             | TRPM3_HUMAN Isoform 2 of Transient receptor potential cation channel subfamily M member 3 OS=Homo sapiens GN=TRPM3      |          | 16.85  |
| Q9HCF6-3             | TRPM3_HUMAN Isoform 3 of Transient receptor potential cation channel subfamily M member 3 OS=Homo sapiens GN=TRPM3      |          | 16.85  |
| Q9HCF6-4             | TRPM3_HUMAN Isoform 4 of Transient receptor potential cation channel subfamily M member 3 OS=Homo sapiens GN=TRPM3      |          | 16.85  |
| Q9HCF6-5             | TRPM3_HUMAN Isoform 5 of Transient receptor potential cation channel subfamily M member 3 OS=Homo sapiens GN=TRPM3      |          | 16.85  |
| Q9HCF6-6             | TRPM3_HUMAN Isoform 6 of Transient receptor potential cation channel subfamily M member 3 OS=Homo sapiens GN=TRPM3      |          | 16.85  |
| Q9HCF6-7             | TRPM3_HUMAN Isoform 7 of Transient receptor potential cation channel subfamily M member 3 OS=Homo sapiens GN=TRPM3      |          | 16.85  |
| Q9HCF6-8             | TRPM3_HUMAN Isoform 8 of Transient receptor potential cation channel subfamily M member 3 OS=Homo sapiens GN=TRPM3      |          | 16.85  |
| Q9HCG8               | CWC22_HUMAN Pre-splicing factor CWC22 homolog OS=Homo sapiens GN=CWC22 PE=1 SV=3                                        |          |        |
| Q9HCH3               | CPNE5_HUMAN Copine-5 OS=Homo sapiens GN=CPNE5 PE=1 SV=2                                                                 |          |        |
| Q9HCI6               | K1586_HUMAN Uncharacterized protein KIAA1586 OS=Homo sapiens GN=KIAA1586 PE=2 SV=2                                      |          |        |
| Q9HCI6-2             | K1586_HUMAN Isoform 2 of Uncharacterized protein KIAA1586 OS=Homo sapiens GN=KIAA1586                                   |          |        |
| Q9HCJ0               | TNR6C_HUMAN Trinucleotide repeat-containing gene 6C protein OS=Homo sapiens GN=TNR6C PE=1 SV=3                          |          |        |
| Q9HCJ0-2             | TNR6C_HUMAN Isoform 2 of Trinucleotide repeat-containing gene 6C protein OS=Homo sapiens GN=TNR6C                       |          |        |
| Q9HCJ2               | LRC4C_HUMAN Leucine-rich repeat-containing protein 4C OS=Homo sapiens GN=LRR4C PE=1 SV=1                                |          |        |
| Q9HCK8               | CHD8_HUMAN Chromodomain-helicase-DNA-binding protein 8 OS=Homo sapiens GN=CHD8 PE=1 SV=5                                |          | 76.89  |
| Q9HCK8-2             | CHD8_HUMAN Isoform 2 of Chromodomain-helicase-DNA-binding protein 8 OS=Homo sapiens GN=CHD8                             |          | 76.89  |
| Q9HCK8;Q9HCK8-2      | CHD8_HUMAN Chromodomain-helicase-DNA-binding protein 8 OS=Homo sapiens GN=CHD8 PE=1 SV=5;>sp Q9HCK8-2 CHD8_HUMA         | 2.16E-10 |        |
| Q9HCM4               | E41L5_HUMAN Band 4.1-like protein 5 OS=Homo sapiens GN=EPB41L5 PE=1 SV=3                                                |          |        |
| Q9HCM4-2             | E41L5_HUMAN Isoform 2 of Band 4.1-like protein 5 OS=Homo sapiens GN=EPB41L5                                             |          |        |
| Q9HCM4-3             | E41L5_HUMAN Isoform 3 of Band 4.1-like protein 5 OS=Homo sapiens GN=EPB41L5                                             |          |        |
| Q9HCM4-4             | E41L5_HUMAN Isoform 4 of Band 4.1-like protein 5 OS=Homo sapiens GN=EPB41L5                                             |          |        |
| Q9HCM4;Q9HCM4-3;Q9HC | E41L5_HUMAN Band 4.1-like protein 5 OS=Homo sapiens GN=EPB41L5 PE=1 SV=3;>sp Q9HCM4-3 E41L5_HUMAN Isoform 3 of Banc     | 2.01E-08 |        |
| Q9HCN4               | GPN1_HUMAN GPN-loop GTPase 1 OS=Homo sapiens GN=GPN1 PE=1 SV=1                                                          | 2.04E-07 |        |
| Q9HCN8               | SDF2L_HUMAN Stromal cell-derived factor 2-like protein 1 OS=Homo sapiens GN=SDF2L1 PE=1 SV=2                            |          | 25.68  |
| Q9HCQ7               | RFRP_HUMAN FMRFamide-related peptides OS=Homo sapiens GN=NPVF PE=1 SV=2                                                 |          |        |
| Q9HCQ7-2             | RFRP_HUMAN Isoform 2 of FMRFamide-related peptides OS=Homo sapiens GN=NPVF                                              |          |        |
| Q9HCS7               | SYF1_HUMAN Pre-splicing factor SYF1 OS=Homo sapiens GN=XAB2 PE=1 SV=2                                                   |          |        |
| Q9HCS7;Q71SV8;Q68CN2 | SYF1_HUMAN Pre-mRNA-splicing factor SYF1 OS=Homo sapiens GN=XAB2 PE=1 SV=2;>tr Q71SV8 Q71SV8_HUMAN Crn-related prot     | 5.06E-07 |        |
| Q9HCU4               | CELR2_HUMAN Cadherin EGF LAG seven-pass G-type receptor 2 OS=Homo sapiens GN=CELSR2 PE=1 SV=1                           |          |        |
| Q9HCY8               | S10AE_HUMAN Protein S100-A14 OS=Homo sapiens GN=S100A14 PE=1 SV=1                                                       |          |        |
| Q9HD15               | SRA1_HUMAN Steroid receptor RNA activator 1 OS=Homo sapiens GN=SRA1 PE=1 SV=1                                           | 3.78E-45 |        |
| Q9HD26;Q9HD26-2;Q9HD | GOPC_HUMAN Golgi-associated PDZ and coiled-coil motif-containing protein OS=Homo sapiens GN=GOPC PE=1 SV=1;>sp Q9HD26-2 | 1.99E-08 |        |
| Q9HD33               | RM47_HUMAN 39S ribosomal protein L47, mitochondrial OS=Homo sapiens GN=MRPL47 PE=1 SV=2                                 |          | 105.65 |
| Q9HD33-2             | RM47_HUMAN Isoform 2 of 39S ribosomal protein L47, mitochondrial OS=Homo sapiens GN=MRPL47                              |          | 105.65 |
| Q9HD33-3             | RM47_HUMAN Isoform 3 of 39S ribosomal protein L47, mitochondrial OS=Homo sapiens GN=MRPL47                              |          | 57.32  |
| Q9HD33;Q9HD33-2      | RM47_HUMAN 39S ribosomal protein L47, mitochondrial OS=Homo sapiens GN=MRPL47 PE=1 SV=2;>sp Q9HD33-2 RM47_HUMAN Ie      | 5.73E-14 |        |
| Q9HD34               | LYRM4_HUMAN LYR motif-containing protein 4 OS=Homo sapiens GN=LYRM4 PE=1 SV=1                                           | 1.77E-18 |        |
| Q9HD42               | CHM1A_HUMAN Charged multivesicular body protein 1a OS=Homo sapiens GN=CHMP1A PE=1 SV=1                                  |          | 32.97  |
| Q9HD45               | TM9S3_HUMAN Transmembrane 9 superfamily member 3 OS=Homo sapiens GN=TM9SF3 PE=1 SV=2                                    |          | 154.23 |
| Q9HD64;Q9HD64-4      | GAGD2_HUMAN G antigen family D member 2 OS=Homo sapiens GN=XAGE1A PE=2 SV=3;>sp Q9HD64-4 GAGD2_HUMAN Isoform D          | 1.40E-10 |        |
| Q9HD67               | MYO10_HUMAN Myosin-X OS=Homo sapiens GN=MYO10 PE=1 SV=3                                                                 |          |        |
| Q9HDB5               | NRX3B_HUMAN Neurexin-3-beta OS=Homo sapiens GN=NRXN3 PE=1 SV=4                                                          |          |        |
| Q9HDB5-2             | NRX3B_HUMAN Isoform 2 of Neurexin-3-beta OS=Homo sapiens GN=NRXN3                                                       |          |        |
| Q9HDB5-3             | NRX3B_HUMAN Isoform 3 of Neurexin-3-beta OS=Homo sapiens GN=NRXN3                                                       |          |        |
| Q9HDB5-4             | NRX3B_HUMAN Isoform 4 of Neurexin-3-beta OS=Homo sapiens GN=NRXN3                                                       |          |        |
| Q9HDC9               | APMAP_HUMAN Adipocyte plasma membrane-associated protein OS=Homo sapiens GN=APMAP PE=1 SV=2                             |          | 506.99 |
| Q9HDC9-2             | APMAP_HUMAN Isoform 2 of Adipocyte plasma membrane-associated protein OS=Homo sapiens GN=APMAP                          |          | 336.2  |
| Q9HDC9;A2A2F9;Q9HDC9 | APMAP_HUMAN Adipocyte plasma membrane-associated protein OS=Homo sapiens GN=APMAP PE=1 SV=2;>tr A2A2F9 A2A2F9_HUM       | 9.66E-39 |        |
| Q9NNW5               | WDR6_HUMAN WD repeat-containing protein 6 OS=Homo sapiens GN=WDR6 PE=1 SV=1                                             | 5.51E-15 |        |
| Q9NNW7;D3YTF9;Q59ET7 | TRXR2_HUMAN Thioredoxin reductase 2, mitochondrial OS=Homo sapiens GN=TXNRD2 PE=1 SV=3;>tr D3YTF9 D3YTF9_HUMAN Unc      | 3.04E-37 |        |
| Q9NP58               | ABCB6_HUMAN ATP-binding cassette sub-family B member 6, mitochondrial OS=Homo sapiens GN=ABCB6 PE=1 SV=1                |          |        |

|                            |                                                                                                                         |           |        |
|----------------------------|-------------------------------------------------------------------------------------------------------------------------|-----------|--------|
| Q9NP58-4                   | ABCB6_HUMAN Isoform 2 of ATP-binding cassette sub-family B member 6, mitochondrial OS=Homo sapiens GN=ABCB6             |           |        |
| Q9NP61;B7Z4Q0;B7Z6L2;      | ARFG3_HUMAN ADP-ribosylation factor GTPase-activating protein 3 OS=Homo sapiens GN=ARFGAP3 PE=1 SV=1;>tr B7Z4Q0 B7Z4Q0  | 9.00E-09  |        |
| Q9NP72                     | RAB18_HUMAN Ras-related protein Rab-18 OS=Homo sapiens GN=RAB18 PE=1 SV=1                                               |           | 300.15 |
| Q9NP73                     | ALG13_HUMAN UDP-N-acetylglucosamine transferase subunit ALG13 homolog OS=Homo sapiens GN=ALG13 PE=1 SV=2                |           | 29.34  |
| Q9NP73-2                   | ALG13_HUMAN Isoform 2 of UDP-N-acetylglucosamine transferase subunit ALG13 homolog OS=Homo sapiens GN=ALG13             |           | 53.81  |
| Q9NP73-3                   | ALG13_HUMAN Isoform 3 of UDP-N-acetylglucosamine transferase subunit ALG13 homolog OS=Homo sapiens GN=ALG13             |           |        |
| Q9NP73-4                   | ALG13_HUMAN Isoform 4 of UDP-N-acetylglucosamine transferase subunit ALG13 homolog OS=Homo sapiens GN=ALG13             |           |        |
| Q9NP74                     | PALMD_HUMAN Palmidolipin OS=Homo sapiens GN=PALMD PE=1 SV=1                                                             |           | 29.3   |
| Q9NP77                     | SSU72_HUMAN RNA polymerase II subunit A C-terminal domain phosphatase SSU72 OS=Homo sapiens GN=SSU72 PE=1 SV=1          |           | 83.03  |
| Q9NP77-2                   | SSU72_HUMAN Isoform 2 of RNA polymerase II subunit A C-terminal domain phosphatase SSU72 OS=Homo sapiens GN=SSU72       |           | 83.03  |
| Q9NP77;B4DMK6;Q5SV20       | SSU72_HUMAN RNA polymerase II subunit A C-terminal domain phosphatase SSU72 OS=Homo sapiens GN=SSU72 PE=1 SV=1;>tr B    | 8.03E-09  |        |
| Q9NP79                     | VTA1_HUMAN Vacuolar protein sorting-associated protein VTA1 homolog OS=Homo sapiens GN=VTA1 PE=1 SV=1                   | 1.28E-16  |        |
| Q9NP81                     | SYSM_HUMAN Seryl-tRNA synthetase, mitochondrial OS=Homo sapiens GN=SARS2 PE=1 SV=1                                      | 2.64E-05  |        |
| Q9NP90                     | RAB9B_HUMAN Ras-related protein Rab-9B OS=Homo sapiens GN=RAB9B PE=1 SV=1                                               |           | 31.61  |
| Q9NP92                     | RT30_HUMAN 28S ribosomal protein S30, mitochondrial OS=Homo sapiens GN=MRPS30 PE=1 SV=2                                 |           | 27.52  |
| Q9NP97                     | DLRB1_HUMAN Dynein light chain roadblock-type 1 OS=Homo sapiens GN=DYNLRB1 PE=1 SV=3                                    |           | 169.78 |
| Q9NPA0                     | COO24_HUMAN UPF0480 protein C15orf24 OS=Homo sapiens GN=C15orf24 PE=1 SV=1                                              |           | 58.09  |
| Q9NPA8                     | ENY2_HUMAN Enhancer of yellow 2 transcription factor homolog OS=Homo sapiens GN=ENY2 PE=1 SV=1                          |           | 92.67  |
| Q9NPD3                     | EXOS4_HUMAN Exosome complex component RRP41 OS=Homo sapiens GN=EXOSC4 PE=1 SV=3                                         |           | 164.82 |
| Q9NPD8                     | UBE2T_HUMAN Ubiquitin-conjugating enzyme E2 T OS=Homo sapiens GN=UBE2T PE=1 SV=1                                        | 4.71E-22  |        |
| Q9NPE3                     | NOP10_HUMAN H/ACA ribonucleoprotein complex subunit 3 OS=Homo sapiens GN=NOP10 PE=1 SV=1                                |           | 277.37 |
| Q9NPF4                     | OSGEP_HUMAN Probable tRNA threonylcarbamoyladenine biosynthesis protein OSGEP OS=Homo sapiens GN=OSGEP PE=1 SV=1        |           | 45.85  |
| Q9NPF5                     | DMAP1_HUMAN DNA methyltransferase 1-associated protein 1 OS=Homo sapiens GN=DMAP1 PE=1 SV=1                             |           |        |
| Q9NPH2;B3KRT1;Q9NPH2       | INO1_HUMAN Inositol-3-phosphate synthase 1 OS=Homo sapiens GN=ISYNA1 PE=1 SV=1;>tr B3KRT1 B3KRT1_HUMAN cDNA FLJ348      | 5.41E-119 |        |
| Q9NPI1                     | BRD7_HUMAN Bromodomain-containing protein 7 OS=Homo sapiens GN=BRD7 PE=1 SV=1                                           |           |        |
| Q9NPI1-2                   | BRD7_HUMAN Isoform 2 of Bromodomain-containing protein 7 OS=Homo sapiens GN=BRD7                                        |           |        |
| Q9NPJ1                     | MKKS_HUMAN McKusick-Kaufman/Bardet-Biedl syndromes putative chaperonin OS=Homo sapiens GN=MKKS PE=1 SV=1                |           |        |
| Q9NPJ3                     | ACO13_HUMAN Acyl-coenzyme A thioesterase 13 OS=Homo sapiens GN=ACOT13 PE=1 SV=1                                         |           | 105.69 |
| Q9NPJ6                     | MED4_HUMAN Mediator of RNA polymerase II transcription subunit 4 OS=Homo sapiens GN=MED4 PE=1 SV=1                      |           |        |
| Q9NPJ8                     | NXT2_HUMAN NTF2-related export protein 2 OS=Homo sapiens GN=NXT2 PE=2 SV=1                                              |           |        |
| Q9NPJ8-2                   | NXT2_HUMAN Isoform 2 of NTF2-related export protein 2 OS=Homo sapiens GN=NXT2                                           |           |        |
| Q9NPJ8-3                   | NXT2_HUMAN Isoform 3 of NTF2-related export protein 2 OS=Homo sapiens GN=NXT2                                           |           |        |
| Q9NPJ8-3;Q9NPJ8-2;Q9NPJ8-1 | NXT2_HUMAN Isoform 3 of NTF2-related export protein 2 OS=Homo sapiens GN=NXT2;>sp Q9NPJ8-2 NXT2_HUMAN Isoform 2 of N    | 5.06E-11  |        |
| Q9NPL8                     | TIDC1_HUMAN Translocase of inner mitochondrial membrane domain-containing protein 1 OS=Homo sapiens GN=TIMMDC1 PE=1 SV= | 8.89E-06  |        |
| Q9NPP4                     | NLRC4_HUMAN NLR family CARD domain-containing protein 4 OS=Homo sapiens GN=NLRC4 PE=1 SV=2                              |           | 31.36  |
| Q9NPP4-2                   | NLRC4_HUMAN Isoform 2 of NLR family CARD domain-containing protein 4 OS=Homo sapiens GN=NLRC4                           |           | 29.41  |
| Q9NPP4-3                   | NLRC4_HUMAN Isoform 3 of NLR family CARD domain-containing protein 4 OS=Homo sapiens GN=NLRC4                           |           | 1.01   |
| Q9NPP4-4                   | NLRC4_HUMAN Isoform 4 of NLR family CARD domain-containing protein 4 OS=Homo sapiens GN=NLRC4                           |           | 1.01   |
| Q9NPQ8-3;Q9NPQ8;Q9NPQ8-1   | RIC8A_HUMAN Isoform 3 of Synembryn-A OS=Homo sapiens GN=RIC8A;>sp Q9NPQ8 RIC8A_HUMAN Synembryn-A OS=Homo sapi           | 1.09E-09  |        |
| Q9NQ29                     | LUC7L_HUMAN Putative RNA-binding protein Luc7-like 1 OS=Homo sapiens GN=LUC7L PE=1 SV=1                                 |           | 251.05 |
| Q9NQ29-2                   | LUC7L_HUMAN Isoform 2 of Putative RNA-binding protein Luc7-like 1 OS=Homo sapiens GN=LUC7L                              |           | 251.05 |
| Q9NQ29-3                   | LUC7L_HUMAN Isoform 3 of Putative RNA-binding protein Luc7-like 1 OS=Homo sapiens GN=LUC7L                              |           | 251.05 |
| Q9NQ29;Q9NQ29-2;Q9NQ29-1   | LUC7L_HUMAN Putative RNA-binding protein Luc7-like 1 OS=Homo sapiens GN=LUC7L PE=1 SV=1;>sp Q9NQ29-2 LUC7L_HUMAN Iso    | 4.67E-64  |        |
| Q9NQ38                     | ISK5_HUMAN Serine protease inhibitor Kazal-type 5 OS=Homo sapiens GN=SPINK5 PE=1 SV=2                                   |           | 28.93  |
| Q9NQ38-2                   | ISK5_HUMAN Isoform short of Serine protease inhibitor Kazal-type 5 OS=Homo sapiens GN=SPINK5                            |           | 28.93  |
| Q9NQ38-3                   | ISK5_HUMAN Isoform long of Serine protease inhibitor Kazal-type 5 OS=Homo sapiens GN=SPINK5                             |           | 28.93  |
| Q9NQ39                     | RS10L_HUMAN Putative 40S ribosomal protein S10-like OS=Homo sapiens GN=RPS10P5 PE=5 SV=1                                |           | 270.14 |
| Q9NQ48                     | LZTL1_HUMAN Leucine zipper transcription factor-like protein 1 OS=Homo sapiens GN=LZTFL1 PE=1 SV=1                      | 1.62E-146 |        |
| Q9NQ50                     | RM40_HUMAN 39S ribosomal protein L40, mitochondrial OS=Homo sapiens GN=MRPL40 PE=1 SV=1                                 |           | 66.18  |
| Q9NQ55                     | SSF1_HUMAN Suppressor of SWI4 1 homolog OS=Homo sapiens GN=PPAN PE=1 SV=1                                               |           |        |
| Q9NQ55-2                   | SSF1_HUMAN Isoform 2 of Suppressor of SWI4 1 homolog OS=Homo sapiens GN=PPAN                                            |           |        |
| Q9NQ55;Q9NQ55-2            | SSF1_HUMAN Suppressor of SWI4 1 homolog OS=Homo sapiens GN=PPAN PE=1 SV=1;>sp Q9NQ55-2 SSF1_HUMAN Isoform 2 of Su       | 3.35E-22  |        |
| Q9NQ75                     | CASS4_HUMAN Cas scaffolding protein family member 4 OS=Homo sapiens GN=CASS4 PE=1 SV=2                                  |           |        |
| Q9NQ75-2                   | CASS4_HUMAN Isoform 2 of Cas scaffolding protein family member 4 OS=Homo sapiens GN=CASS4                               |           |        |
| Q9NQ75-3                   | CASS4_HUMAN Isoform 3 of Cas scaffolding protein family member 4 OS=Homo sapiens GN=CASS4                               |           |        |
| Q9NQ88                     | TIGAR_HUMAN Probable fructose-2,6-bisphosphatase TIGAR OS=Homo sapiens GN=TIGAR PE=1 SV=1                               | 5.63E-44  |        |
| Q9NQC3                     | RTN4_HUMAN Reticulon-4 OS=Homo sapiens GN=RTN4 PE=1 SV=2                                                                |           | 625.57 |
| Q9NQC3-2                   | RTN4_HUMAN Isoform 2 of Reticulon-4 OS=Homo sapiens GN=RTN4                                                             |           | 677.04 |
| Q9NQC3-3                   | RTN4_HUMAN Isoform 3 of Reticulon-4 OS=Homo sapiens GN=RTN4                                                             |           | 403.04 |
| Q9NQC3-4                   | RTN4_HUMAN Isoform 4 of Reticulon-4 OS=Homo sapiens GN=RTN4                                                             |           | 413.24 |
| Q9NQC3-5                   | RTN4_HUMAN Isoform 5 of Reticulon-4 OS=Homo sapiens GN=RTN4                                                             |           | 677.49 |

|                          |                                                                                                                                                                                                                                        |           |        |
|--------------------------|----------------------------------------------------------------------------------------------------------------------------------------------------------------------------------------------------------------------------------------|-----------|--------|
| Q9NQC3-6                 | RTN4_HUMAN Isoform 6 of Reticulon-4 OS=Homo sapiens GN=RTN4                                                                                                                                                                            |           | 413.14 |
| Q9NQC3;Q9NQC3-5;Q7L7     | RTN4_HUMAN Reticulon-4 OS=Homo sapiens GN=RTN4 PE=1 SV=2;>sp Q9NQC3-5 RTN4_HUMAN Isoform 5 of Reticulon-4 OS=Homo sapiens GN=RTN4 PE=1 SV=1                                                                                            | 2.16E-213 |        |
| Q9NQE9                   | HINT3_HUMAN Histidine triad nucleotide-binding protein 3 OS=Homo sapiens GN=HINT3 PE=1 SV=1                                                                                                                                            | 7.40E-10  |        |
| Q9NQG5                   | RPR1B_HUMAN Regulation of nuclear pre domain-containing protein 1B OS=Homo sapiens GN=RPRD1B PE=1 SV=1                                                                                                                                 |           | 333.74 |
| Q9NQH7                   | XPP3_HUMAN Probable Xaa-Pro aminopeptidase 3 OS=Homo sapiens GN=XPNPEP3 PE=1 SV=1                                                                                                                                                      |           | 51.48  |
| Q9NQH7-2                 | XPP3_HUMAN Isoform 2 of Probable Xaa-Pro aminopeptidase 3 OS=Homo sapiens GN=XPNPEP3                                                                                                                                                   |           | 40.2   |
| Q9NQH7-3                 | XPP3_HUMAN Isoform 3 of Probable Xaa-Pro aminopeptidase 3 OS=Homo sapiens GN=XPNPEP3                                                                                                                                                   |           | 45.86  |
| Q9NQH7-4                 | XPP3_HUMAN Isoform 4 of Probable Xaa-Pro aminopeptidase 3 OS=Homo sapiens GN=XPNPEP3                                                                                                                                                   |           | 51.48  |
| Q9NQH7-5                 | XPP3_HUMAN Isoform 5 of Probable Xaa-Pro aminopeptidase 3 OS=Homo sapiens GN=XPNPEP3                                                                                                                                                   |           | 45.86  |
| Q9NQH7;Q9NQH7-4;Q9NQC3   | XPP3_HUMAN Probable Xaa-Pro aminopeptidase 3 OS=Homo sapiens GN=XPNPEP3 PE=1 SV=1;>sp Q9NQH7-4 XPP3_HUMAN Isoform 4 of Probable Xaa-Pro aminopeptidase 3 OS=Homo sapiens GN=XPNPEP3 PE=1 SV=1                                          | 1.60E-09  |        |
| Q9NQI0                   | DDX4_HUMAN Probable ATP-dependent RNA helicase DDX4 OS=Homo sapiens GN=DDX4 PE=2 SV=2                                                                                                                                                  |           | 86.82  |
| Q9NQI0-2                 | DDX4_HUMAN Isoform 2 of Probable ATP-dependent RNA helicase DDX4 OS=Homo sapiens GN=DDX4                                                                                                                                               |           | 86.82  |
| Q9NQP4                   | PFD4_HUMAN Prefoldin subunit 4 OS=Homo sapiens GN=PFDN4 PE=1 SV=1                                                                                                                                                                      |           |        |
| Q9NQR4                   | NIT2_HUMAN Omega-amidase NIT2 OS=Homo sapiens GN=NIT2 PE=1 SV=1                                                                                                                                                                        | 8.59E-22  |        |
| Q9NQS1                   | AVEN_HUMAN Cell death regulator Aven OS=Homo sapiens GN=AVEN PE=1 SV=1                                                                                                                                                                 |           |        |
| Q9NQS7                   | INCE_HUMAN Inner centromere protein OS=Homo sapiens GN=INCENP PE=1 SV=3                                                                                                                                                                |           |        |
| Q9NQS7-2                 | INCE_HUMAN Isoform 2 of Inner centromere protein OS=Homo sapiens GN=INCENP                                                                                                                                                             |           |        |
| Q9NQT4                   | EXOS5_HUMAN Exosome complex component RRP46 OS=Homo sapiens GN=EXOSC5 PE=1 SV=1                                                                                                                                                        |           | 80.11  |
| Q9NQT4;B2RC50            | EXOS5_HUMAN Exosome complex exonuclease RRP46 OS=Homo sapiens GN=EXOSC5 PE=1 SV=1;>tr B2RC50 B2RC50_HUMAN cDN.                                                                                                                         | 2.25E-43  |        |
| Q9NQT5                   | EXOS3_HUMAN Exosome complex component RRP40 OS=Homo sapiens GN=EXOSC3 PE=1 SV=3                                                                                                                                                        |           | 243.11 |
| Q9NQT5;A8K0K6;Q9NYS3     | EXOS3_HUMAN Exosome complex exonuclease RRP40 OS=Homo sapiens GN=EXOSC3 PE=1 SV=3;>tr A8K0K6 A8K0K6_HUMAN cDN.                                                                                                                         | 3.14E-39  |        |
| Q9NQT8                   | KI13B_HUMAN Kinesin-like protein KIF13B OS=Homo sapiens GN=KIF13B PE=1 SV=1                                                                                                                                                            |           |        |
| Q9NQW1                   | SC31B_HUMAN Protein transport protein Sec31B OS=Homo sapiens GN=SEC31B PE=1 SV=1                                                                                                                                                       |           |        |
| Q9NQW1-2                 | SC31B_HUMAN Isoform 2 of Protein transport protein Sec31B OS=Homo sapiens GN=SEC31B                                                                                                                                                    |           |        |
| Q9NQW1-4                 | SC31B_HUMAN Isoform 4 of Protein transport protein Sec31B OS=Homo sapiens GN=SEC31B                                                                                                                                                    |           |        |
| Q9NQW1-5                 | SC31B_HUMAN Isoform 5 of Protein transport protein Sec31B OS=Homo sapiens GN=SEC31B                                                                                                                                                    |           |        |
| Q9NQW6                   | ANLN_HUMAN Actin-binding protein anillin OS=Homo sapiens GN=ANLN PE=1 SV=2                                                                                                                                                             |           | 103.86 |
| Q9NQW6-2                 | ANLN_HUMAN Isoform 2 of Actin-binding protein anillin OS=Homo sapiens GN=ANLN                                                                                                                                                          |           | 103.86 |
| Q9NQW6;Q9NQW6-2          | ANLN_HUMAN Actin-binding protein anillin OS=Homo sapiens GN=ANLN PE=1 SV=2;>sp Q9NQW6-2 ANLN_HUMAN Isoform 2 of Actin-binding protein anillin OS=Homo sapiens GN=ANLN                                                                  | 1.19E-113 |        |
| Q9NQW7                   | XPP1_HUMAN Xaa-Pro aminopeptidase 1 OS=Homo sapiens GN=XPNPEP1 PE=1 SV=3                                                                                                                                                               |           |        |
| Q9NQW7-2                 | XPP1_HUMAN Isoform 2 of Xaa-Pro aminopeptidase 1 OS=Homo sapiens GN=XPNPEP1                                                                                                                                                            |           |        |
| Q9NQW7;Q9NQW7-2          | XPP1_HUMAN Xaa-Pro aminopeptidase 1 OS=Homo sapiens GN=XPNPEP1 PE=1 SV=3;>sp Q9NQW7-2 XPP1_HUMAN Isoform 2 of Xaa-Pro aminopeptidase 1 OS=Homo sapiens GN=XPNPEP1 PE=1 SV=3                                                            | 9.76E-95  |        |
| Q9NQX3-2;Q9NQX3          | 2 GEPH_HUMAN Isoform 2 of Gephyrin OS=Homo sapiens GN=GPHN;>sp Q9NQX3 GEPH_HUMAN Gephyrin OS=Homo sapiens GN=GPHN                                                                                                                      | 1.33E-19  |        |
| Q9NQX4                   | MYO5C_HUMAN Myosin-Vc OS=Homo sapiens GN=MYO5C PE=1 SV=2                                                                                                                                                                               |           |        |
| Q9NQY0;Q9NQY0-2          | BIN3_HUMAN Bridging integrator 3 OS=Homo sapiens GN=BIN3 PE=1 SV=1;>sp Q9NQY0-2 BIN3_HUMAN Isoform 2 of Bridging integrator 3 OS=Homo sapiens GN=BIN3 PE=1 SV=1                                                                        | 1.36E-13  |        |
| Q9NQZ2                   | SAS10_HUMAN Something about silencing protein 10 OS=Homo sapiens GN=UTP3 PE=1 SV=1                                                                                                                                                     |           |        |
| Q9NR09                   | BIRC6_HUMAN Baculoviral IAP repeat-containing protein 6 OS=Homo sapiens GN=BIRC6 PE=1 SV=2                                                                                                                                             |           |        |
| Q9NR12                   | PDLI7_HUMAN PDZ and LIM domain protein 7 OS=Homo sapiens GN=PDLIM7 PE=1 SV=1                                                                                                                                                           |           | 171.53 |
| Q9NR12-2                 | PDLI7_HUMAN Isoform 2 of PDZ and LIM domain protein 7 OS=Homo sapiens GN=PDLIM7                                                                                                                                                        |           | 97.3   |
| Q9NR12-3                 | PDLI7_HUMAN Isoform 3 of PDZ and LIM domain protein 7 OS=Homo sapiens GN=PDLIM7                                                                                                                                                        |           | 158.94 |
| Q9NR12-4                 | PDLI7_HUMAN Isoform 4 of PDZ and LIM domain protein 7 OS=Homo sapiens GN=PDLIM7                                                                                                                                                        |           | 162.05 |
| Q9NR12-5                 | PDLI7_HUMAN Isoform 5 of PDZ and LIM domain protein 7 OS=Homo sapiens GN=PDLIM7                                                                                                                                                        |           | 162.05 |
| Q9NR12-6                 | PDLI7_HUMAN Isoform 6 of PDZ and LIM domain protein 7 OS=Homo sapiens GN=PDLIM7                                                                                                                                                        |           | 162.05 |
| Q9NR12;Q9NR12-2          | PDLI7_HUMAN PDZ and LIM domain protein 7 OS=Homo sapiens GN=PDLIM7 PE=1 SV=1;>sp Q9NR12-2 PDLI7_HUMAN Isoform 2 of PDZ and LIM domain protein 7 OS=Homo sapiens GN=PDLIM7 PE=1 SV=1                                                    | 1.56E-67  |        |
| Q9NR19                   | ACSA_HUMAN Acetyl-coenzyme A synthetase, cytoplasmic OS=Homo sapiens GN=ACSS2 PE=1 SV=1                                                                                                                                                | 6.76E-10  |        |
| Q9NR22                   | ANM8_HUMAN Protein arginine N-methyltransferase 8 OS=Homo sapiens GN=PRMT8 PE=1 SV=2                                                                                                                                                   |           | 79.99  |
| Q9NR22-2                 | ANM8_HUMAN Isoform 2 of Protein arginine N-methyltransferase 8 OS=Homo sapiens GN=PRMT8                                                                                                                                                |           | 79.99  |
| Q9NR28                   | DBLOH_HUMAN Diablo homolog, mitochondrial OS=Homo sapiens GN=DIABLO PE=1 SV=1                                                                                                                                                          |           | 118.76 |
| Q9NR28-2                 | DBLOH_HUMAN Isoform 2 of Diablo homolog, mitochondrial OS=Homo sapiens GN=DIABLO                                                                                                                                                       |           | 118.76 |
| Q9NR28;Q9NR28-2          | DBLOH_HUMAN Diablo homolog, mitochondrial OS=Homo sapiens GN=DIABLO PE=1 SV=1;>sp Q9NR28-2 DBLOH_HUMAN Isoform 2 of Diablo homolog, mitochondrial OS=Homo sapiens GN=DIABLO                                                            | 5.42E-11  |        |
| Q9NR30                   | DDX21_HUMAN Nucleolar RNA helicase 2 OS=Homo sapiens GN=DDX21 PE=1 SV=5                                                                                                                                                                |           | 329.42 |
| Q9NR30-2                 | DDX21_HUMAN Isoform 2 of Nucleolar RNA helicase 2 OS=Homo sapiens GN=DDX21                                                                                                                                                             |           | 329.42 |
| Q9NR30;Q9NR30-2          | DDX21_HUMAN Nucleolar RNA helicase 2 OS=Homo sapiens GN=DDX21 PE=1 SV=5;>sp Q9NR30-2 DDX21_HUMAN Isoform 2 of Nucleolar RNA helicase 2 OS=Homo sapiens GN=DDX21                                                                        | 0         |        |
| Q9NR31                   | SAR1A_HUMAN GTP-binding protein SAR1a OS=Homo sapiens GN=SAR1A PE=1 SV=1                                                                                                                                                               |           | 107.91 |
| Q9NR33                   | DPOE4_HUMAN DNA polymerase epsilon subunit 4 OS=Homo sapiens GN=POLE4 PE=1 SV=2                                                                                                                                                        |           | 60.9   |
| Q9NR45                   | SIAS_HUMAN Sialic acid synthase OS=Homo sapiens GN=NANS PE=1 SV=2                                                                                                                                                                      |           | 247.29 |
| Q9NR46-2;Q9NR46          | 2 SHLB2_HUMAN Isoform 2 of Endophilin-B2 OS=Homo sapiens GN=SH3GLB2;>sp Q9NR46 SHLB2_HUMAN Endophilin-B2 OS=Homo sapiens GN=SH3GLB2 PE=1 SV=1;>sp Q9NR46-2 SHLB2_HUMAN Isoform 2 of Endophilin-B2 OS=Homo sapiens GN=SH3GLB2 PE=1 SV=1 | 3.52E-13  |        |
| Q9NR46;Q9NR46-2          | SHLB2_HUMAN Endophilin-B2 OS=Homo sapiens GN=SH3GLB2 PE=1 SV=1;>sp Q9NR46-2 SHLB2_HUMAN Isoform 2 of Endophilin-B2 OS=Homo sapiens GN=SH3GLB2 PE=1 SV=1                                                                                | 6.23E-28  |        |
| Q9NR48                   | ASH1L_HUMAN Probable histone-lysine N-methyltransferase ASH1L OS=Homo sapiens GN=ASH1L PE=1 SV=2                                                                                                                                       |           | 42.21  |
| Q9NR48-2                 | ASH1L_HUMAN Isoform 2 of Probable histone-lysine N-methyltransferase ASH1L OS=Homo sapiens GN=ASH1L                                                                                                                                    |           | 42.21  |
| Q9NR50;Q9NR50-2;Q9NR50-3 | EI2BG_HUMAN Translation initiation factor eIF-2B subunit gamma OS=Homo sapiens GN=EIF2B3 PE=1 SV=1;>sp Q9NR50-2 EI2BG_HUMAN Isoform 2 of Translation initiation factor eIF-2B subunit gamma OS=Homo sapiens GN=EIF2B3 PE=1 SV=1        | 2.03E-18  |        |



|                       |                                                                                                                             |            |        |
|-----------------------|-----------------------------------------------------------------------------------------------------------------------------|------------|--------|
| Q9NR56                | MBNL1_HUMAN Muscleblind-like protein 1 OS=Homo sapiens GN=MBNL1 PE=1 SV=2                                                   |            |        |
| Q9NR56-2              | MBNL1_HUMAN Isoform 2 of Muscleblind-like protein 1 OS=Homo sapiens GN=MBNL1                                                |            |        |
| Q9NR56-3              | MBNL1_HUMAN Isoform 3 of Muscleblind-like protein 1 OS=Homo sapiens GN=MBNL1                                                |            |        |
| Q9NR56;Q5VZF2;Q9NR56  | MBNL1_HUMAN Muscleblind-like protein 1 OS=Homo sapiens GN=MBNL1 PE=1 SV=2;>sp Q5VZF2 MBNL2_HUMAN Muscleblind-like pr        | 1.77E-12   |        |
| Q9NR61                | DLL4_HUMAN Delta-like protein 4 OS=Homo sapiens GN=DLL4 PE=1 SV=1                                                           |            |        |
| Q9NR64                | KLHL1_HUMAN Kelch-like protein 1 OS=Homo sapiens GN=KLHL1 PE=2 SV=1                                                         |            | 26.56  |
| Q9NR77                | PXMP2_HUMAN Peroxisomal membrane protein 2 OS=Homo sapiens GN=PXMP2 PE=1 SV=3                                               |            | 15.23  |
| Q9NR96                | TLR9_HUMAN Toll-like receptor 9 OS=Homo sapiens GN=TLR9 PE=1 SV=2                                                           |            |        |
| Q9NR96-2              | TLR9_HUMAN Isoform 2 of Toll-like receptor 9 OS=Homo sapiens GN=TLR9                                                        |            |        |
| Q9NR96-3              | TLR9_HUMAN Isoform 3 of Toll-like receptor 9 OS=Homo sapiens GN=TLR9                                                        |            |        |
| Q9NR96-4              | TLR9_HUMAN Isoform 4 of Toll-like receptor 9 OS=Homo sapiens GN=TLR9                                                        |            |        |
| Q9NR96-5              | TLR9_HUMAN Isoform 5 of Toll-like receptor 9 OS=Homo sapiens GN=TLR9                                                        |            |        |
| Q9NR99                | MXRA5_HUMAN Matrix-remodeling-associated protein 5 OS=Homo sapiens GN=MXRA5 PE=2 SV=3                                       |            |        |
| Q9NRC6                | SPTN5_HUMAN Spectrin beta chain, brain 4 OS=Homo sapiens GN=SPTBN5 PE=1 SV=1                                                |            |        |
| Q9NRD1                | FBX6_HUMAN F-box only protein 6 OS=Homo sapiens GN=FBXO6 PE=1 SV=1                                                          | 5.75E-11   |        |
| Q9NRD5                | PICK1_HUMAN PRKCA-binding protein OS=Homo sapiens GN=PICK1 PE=1 SV=2                                                        |            | 49.25  |
| Q9NRF8                | PYRG2_HUMAN CTP synthase 2 OS=Homo sapiens GN=CTPS2 PE=1 SV=1                                                               | 1.07E-34   |        |
| Q9NRF9                | DPOE3_HUMAN DNA polymerase epsilon subunit 3 OS=Homo sapiens GN=POLE3 PE=1 SV=1                                             |            | 130.64 |
| Q9NRG0                | CHRC1_HUMAN Chromatin accessibility complex protein 1 OS=Homo sapiens GN=CHRAC1 PE=1 SV=1                                   |            |        |
| Q9NRG7-2;Q9NRG7;Q9NR2 | D39U1_HUMAN Isoform 2 of Epimerase family protein SDR39U1 OS=Homo sapiens GN=SDR39U1;>sp Q9NRG7 D39U1_HUMAN Epi             | 1.01E-09   |        |
| Q9NRG7;Q9NRG7-2;Q9NR  | D39U1_HUMAN Epimerase family protein SDR39U1 OS=Homo sapiens GN=SDR39U1 PE=2 SV=2;>sp Q9NRG7-2 D39U1_HUMAN Isof             | 1.85E-12   |        |
| Q9NRG9                | AAAS_HUMAN Aladin OS=Homo sapiens GN=AAAS PE=1 SV=1                                                                         | 7.96E-10   |        |
| Q9NRH3                | TBG2_HUMAN Tubulin gamma-2 chain OS=Homo sapiens GN=TUBG2 PE=1 SV=1                                                         |            | 30.66  |
| Q9NRI5                | DISC1_HUMAN Disrupted in schizophrenia 1 protein OS=Homo sapiens GN=DISC1 PE=1 SV=3                                         |            |        |
| Q9NRI5-2              | DISC1_HUMAN Isoform 2 of Disrupted in schizophrenia 1 protein OS=Homo sapiens GN=DISC1                                      |            |        |
| Q9NRI5-3              | DISC1_HUMAN Isoform 3 of Disrupted in schizophrenia 1 protein OS=Homo sapiens GN=DISC1                                      |            |        |
| Q9NRI5-4              | DISC1_HUMAN Isoform 4 of Disrupted in schizophrenia 1 protein OS=Homo sapiens GN=DISC1                                      |            |        |
| Q9NRK6                | ABCBA_HUMAN ATP-binding cassette sub-family B member 10, mitochondrial OS=Homo sapiens GN=ABCB10 PE=1 SV=2                  |            |        |
| Q9NRL2                | BAZ1A_HUMAN Bromodomain adjacent to zinc finger domain protein 1A OS=Homo sapiens GN=BAZ1A PE=1 SV=2                        |            | 34.84  |
| Q9NRL2-2              | BAZ1A_HUMAN Isoform 2 of Bromodomain adjacent to zinc finger domain protein 1A OS=Homo sapiens GN=BAZ1A                     |            | 34.84  |
| Q9NRL2;Q9NRL2-2       | BAZ1A_HUMAN Bromodomain adjacent to zinc finger domain protein 1A OS=Homo sapiens GN=BAZ1A PE=1 SV=2;>sp Q9NRL2-2 BA        | 0.00019025 |        |
| Q9NRL3                | STRN4_HUMAN Striatin-4 OS=Homo sapiens GN=STRN4 PE=1 SV=2                                                                   | 5.46E-16   |        |
| Q9NRN5;Q9NRN5-2;Q9NR  | OLFL3_HUMAN Olfactomedin-like protein 3 OS=Homo sapiens GN=OLFML3 PE=2 SV=1;>sp Q9NRN5-2 OLFL3_HUMAN Isoform 2 of O         | 1.29E-25   |        |
| Q9NRN7                | ADPPT_HUMAN L-aminoadipate-semialdehyde dehydrogenase-phosphopantetheinyl transferase OS=Homo sapiens GN=AASDHPPT PE=1 SV=2 |            | 39.08  |
| Q9NRP0                | OSTC_HUMAN Oligosaccharyltransferase complex subunit OSTC OS=Homo sapiens GN=OSTC PE=1 SV=1                                 |            | 68.74  |
| Q9NRP2                | CP061_HUMAN Uncharacterized protein C16orf61 OS=Homo sapiens GN=C16orf61 PE=1 SV=1                                          |            | 44.48  |
| Q9NRR4                | RNC_HUMAN Ribonuclease 3 OS=Homo sapiens GN=DROSHA PE=1 SV=2                                                                |            |        |
| Q9NRR4-2              | RNC_HUMAN Isoform 2 of Ribonuclease 3 OS=Homo sapiens GN=DROSHA                                                             |            |        |
| Q9NRR4-3              | RNC_HUMAN Isoform 3 of Ribonuclease 3 OS=Homo sapiens GN=DROSHA                                                             |            |        |
| Q9NRR5                | UBQL4_HUMAN Ubiquilin-4 OS=Homo sapiens GN=UBQLN4 PE=1 SV=2                                                                 | 3.60E-17   |        |
| Q9NRU3                | CNNM1_HUMAN Metal transporter CNNM1 OS=Homo sapiens GN=CNNM1 PE=2 SV=3                                                      |            | 24.81  |
| Q9NRU3-2              | CNNM1_HUMAN Isoform 2 of Metal transporter CNNM1 OS=Homo sapiens GN=CNNM1                                                   |            | 24.81  |
| Q9NRV9                | HEBP1_HUMAN Heme-binding protein 1 OS=Homo sapiens GN=HEBP1 PE=1 SV=1                                                       |            | 163.29 |
| Q9NRW1                | RAB6B_HUMAN Ras-related protein Rab-6B OS=Homo sapiens GN=RAB6B PE=1 SV=1                                                   |            | 305.19 |
| Q9NRW3                | ABC3C_HUMAN Probable DNA dC->dU-editing enzyme APOBEC-3C OS=Homo sapiens GN=APOBEC3C PE=1 SV=2                              |            | 98.27  |
| Q9NRW7                | VPS45_HUMAN Vacuolar protein sorting-associated protein 45 OS=Homo sapiens GN=VPS45 PE=1 SV=1                               |            | 90.09  |
| Q9NRX1                | PNO1_HUMAN RNA-binding protein PNO1 OS=Homo sapiens GN=PNO1 PE=1 SV=1                                                       |            | 49.07  |
| Q9NRX2                | RM17_HUMAN 39S ribosomal protein L17, mitochondrial OS=Homo sapiens GN=MRPL17 PE=1 SV=1                                     |            | 138.89 |
| Q9NRX4                | PHP14_HUMAN 14 kDa phosphohistidine phosphatase OS=Homo sapiens GN=PHPT1 PE=1 SV=1                                          | 6.33E-58   |        |
| Q9NRY2                | SOSSC_HUMAN SOSS complex subunit C OS=Homo sapiens GN=SSBIP1 PE=1 SV=1                                                      |            | 24.25  |
| Q9NRY2-2              | SOSSC_HUMAN Isoform 2 of SOSS complex subunit C OS=Homo sapiens GN=SSBIP1                                                   |            | 24.25  |
| Q9NRY4;Q9NRY4-2       | RHG35_HUMAN Rho GTPase-activating protein 35 OS=Homo sapiens GN=ARHGAP35 PE=1 SV=2;>sp Q9NRY4-2 RHG35_HUMAN Isof            | 2.29E-23   |        |
| Q9NRY5                | F1142_HUMAN Protein FAM114A2 OS=Homo sapiens GN=FAM114A2 PE=1 SV=4                                                          |            |        |
| Q9NRZ9                | HELLS_HUMAN Lymphoid-specific helicase OS=Homo sapiens GN=HELLS PE=1 SV=1                                                   |            |        |
| Q9NRZ9-2              | HELLS_HUMAN Isoform 2 of Lymphoid-specific helicase OS=Homo sapiens GN=HELLS                                                |            |        |
| Q9NRZ9-3              | HELLS_HUMAN Isoform 3 of Lymphoid-specific helicase OS=Homo sapiens GN=HELLS                                                |            |        |
| Q9NRZ9-4              | HELLS_HUMAN Isoform 4 of Lymphoid-specific helicase OS=Homo sapiens GN=HELLS                                                |            |        |
| Q9NRZ9-5              | HELLS_HUMAN Isoform 5 of Lymphoid-specific helicase OS=Homo sapiens GN=HELLS                                                |            |        |
| Q9NRZ9-6              | HELLS_HUMAN Isoform 6 of Lymphoid-specific helicase OS=Homo sapiens GN=HELLS                                                |            |        |
| Q9NRZ9-7              | HELLS_HUMAN Isoform 7 of Lymphoid-specific helicase OS=Homo sapiens GN=HELLS                                                |            |        |
| Q9NRZ9-8              | HELLS_HUMAN Isoform 8 of Lymphoid-specific helicase OS=Homo sapiens GN=HELLS                                                |            |        |

|                       |                                                                                                                        |           |          |
|-----------------------|------------------------------------------------------------------------------------------------------------------------|-----------|----------|
| Q9NRZ9;Q9NRZ9-2;Q9NR  | HELLS_HUMAN Lymphoid-specific helicase OS=Homo sapiens GN=HELLS PE=1 SV=1;>sp Q9NRZ9-2 HELLS_HUMAN Isoform 2 of Lyr    | 5.10E-10  |          |
| Q9NS23                | RASF1_HUMAN Ras association domain-containing protein 1 OS=Homo sapiens GN=RASSF1 PE=1 SV=1                            |           |          |
| Q9NS23-2              | RASF1_HUMAN Isoform A of Ras association domain-containing protein 1 OS=Homo sapiens GN=RASSF1                         |           |          |
| Q9NS23-3              | RASF1_HUMAN Isoform B of Ras association domain-containing protein 1 OS=Homo sapiens GN=RASSF1                         |           |          |
| Q9NS23-4              | RASF1_HUMAN Isoform C of Ras association domain-containing protein 1 OS=Homo sapiens GN=RASSF1                         |           |          |
| Q9NS23-5              | RASF1_HUMAN Isoform E of Ras association domain-containing protein 1 OS=Homo sapiens GN=RASSF1                         |           |          |
| Q9NS25                | SPNXB_HUMAN Sperm protein associated with the nucleus on the X chromosome B/F OS=Homo sapiens GN=SPANXB1 PE=2 SV=1     |           | 30.11    |
| Q9NS69                | TOM22_HUMAN Mitochondrial import receptor subunit TOM22 homolog OS=Homo sapiens GN=TOMM22 PE=1 SV=3                    |           | 176.72   |
| Q9NS84                | CHST7_HUMAN Carbohydrate sulfotransferase 7 OS=Homo sapiens GN=CHST7 PE=1 SV=2                                         |           |          |
| Q9NS86                | LANC2_HUMAN LanC-like protein 2 OS=Homo sapiens GN=LANCL2 PE=1 SV=1                                                    |           |          |
| Q9NS87;Q9NS87-2;Q9NSI | KIF15_HUMAN Kinesin-like protein KIF15 OS=Homo sapiens GN=KIF15 PE=1 SV=1;>sp Q9NS87-2 KIF15_HUMAN Isoform 2 of Kinesi | 4.00E-19  |          |
| Q9NSB2                | KRT84_HUMAN Keratin, type II cuticular Hb4 OS=Homo sapiens GN=KRT84 PE=1 SV=2                                          |           | 187.04   |
| Q9NSB4                | KRT82_HUMAN Keratin, type II cuticular Hb2 OS=Homo sapiens GN=KRT82 PE=1 SV=3                                          |           | 22.17    |
| Q9NSC5                | HOME3_HUMAN Homer protein homolog 3 OS=Homo sapiens GN=HOMER3 PE=1 SV=2                                                |           | 36.75    |
| Q9NSC5-2              | HOME3_HUMAN Isoform 2 of Homer protein homolog 3 OS=Homo sapiens GN=HOMER3                                             |           | 36.75    |
| Q9NSC5;Q9NSC5-2       | HOME3_HUMAN Homer protein homolog 3 OS=Homo sapiens GN=HOMER3 PE=1 SV=2;>sp Q9NSC5-2 HOME3_HUMAN Isoform 2 of          | 4.41E-09  |          |
| Q9NSD9                | SYFB_HUMAN Phenylalanyl-tRNA synthetase beta chain OS=Homo sapiens GN=FARSB PE=1 SV=3                                  |           | 565.87   |
| Q9NSE4                | SYIM_HUMAN Isoleucyl-tRNA synthetase, mitochondrial OS=Homo sapiens GN=IARS2 PE=1 SV=2                                 |           | 203.81   |
| Q9NSE7                | ABCCD_HUMAN Putative ATP-binding cassette sub-family C member 13 OS=Homo sapiens GN=ABCC13 PE=2 SV=2                   |           | 28.97    |
| Q9NSE7-2              | ABCCD_HUMAN Isoform 2 of Putative ATP-binding cassette sub-family C member 13 OS=Homo sapiens GN=ABCC13                |           | 28.97    |
| Q9NSE7-3              | ABCCD_HUMAN Isoform 3 of Putative ATP-binding cassette sub-family C member 13 OS=Homo sapiens GN=ABCC13                |           | 28.97    |
| Q9NSE7-4              | ABCCD_HUMAN Isoform 4 of Putative ATP-binding cassette sub-family C member 13 OS=Homo sapiens GN=ABCC13                |           | 31.88    |
| Q9NSE7-5              | ABCCD_HUMAN Isoform 5 of Putative ATP-binding cassette sub-family C member 13 OS=Homo sapiens GN=ABCC13                |           |          |
| Q9NSI2                | CU070_HUMAN Uncharacterized protein C21orf70 OS=Homo sapiens GN=C21orf70 PE=1 SV=2                                     |           |          |
| Q9NSI2-2              | CU070_HUMAN Isoform B of Uncharacterized protein C21orf70 OS=Homo sapiens GN=C21orf70                                  |           |          |
| Q9NSI2;Q9NSI2-2       | CU070_HUMAN Uncharacterized protein C21orf70 OS=Homo sapiens GN=C21orf70 PE=1 SV=2;>sp Q9NSI2-2 CU070_HUMAN Isoform    | 3.94E-08  |          |
| Q9NSI6                | BRWD1_HUMAN Bromodomain and WD repeat-containing protein 1 OS=Homo sapiens GN=BRWD1 PE=1 SV=4                          |           |          |
| Q9NSI6-2              | BRWD1_HUMAN Isoform B of Bromodomain and WD repeat-containing protein 1 OS=Homo sapiens GN=BRWD1                       |           |          |
| Q9NSI6-3              | BRWD1_HUMAN Isoform C of Bromodomain and WD repeat-containing protein 1 OS=Homo sapiens GN=BRWD1                       |           |          |
| Q9NSV4                | DIAP3_HUMAN Protein diaphanous homolog 3 OS=Homo sapiens GN=DIAPH3 PE=1 SV=4                                           |           | 0.83     |
| Q9NSV4-1              | DIAP3_HUMAN Isoform 1 of Protein diaphanous homolog 3 OS=Homo sapiens GN=DIAPH3                                        |           | 0.83     |
| Q9NSV4-4              | DIAP3_HUMAN Isoform 4 of Protein diaphanous homolog 3 OS=Homo sapiens GN=DIAPH3                                        |           | 0.83     |
| Q9NSV4-5              | DIAP3_HUMAN Isoform 5 of Protein diaphanous homolog 3 OS=Homo sapiens GN=DIAPH3                                        |           | 0.83     |
| Q9NSV4-6              | DIAP3_HUMAN Isoform 6 of Protein diaphanous homolog 3 OS=Homo sapiens GN=DIAPH3                                        |           | 0.83     |
| Q9NSV4-7              | DIAP3_HUMAN Isoform 7 of Protein diaphanous homolog 3 OS=Homo sapiens GN=DIAPH3                                        |           | 0.83     |
| Q9NSV4;Q9NSV4-4;Q9NS  | DIAP3_HUMAN Protein diaphanous homolog 3 OS=Homo sapiens GN=DIAPH3 PE=1 SV=4;>sp Q9NSV4-4 DIAP3_HUMAN Isoform 4 o      | 1.94E-67  |          |
| Q9NSY0-5              | NRBP2_HUMAN Isoform 4 of Nuclear receptor-binding protein 2 OS=Homo sapiens GN=NRBP2                                   |           |          |
| Q9NSY1                | BMP2K_HUMAN BMP-2-inducible protein kinase OS=Homo sapiens GN=BMP2K PE=1 SV=2                                          |           | 2.86E-06 |
| Q9NT62;Q9NT62-2       | ATG3_HUMAN Ubiquitin-like-conjugating enzyme ATG3 OS=Homo sapiens GN=ATG3 PE=1 SV=1;>sp Q9NT62-2 ATG3_HUMAN Isoform    | 5.40E-15  |          |
| Q9NTI2                | AT8A2_HUMAN Probable phospholipid-transporting ATPase IB OS=Homo sapiens GN=ATP8A2 PE=2 SV=2                           |           |          |
| Q9NTI2-3              | AT8A2_HUMAN Isoform 2 of Probable phospholipid-transporting ATPase IB OS=Homo sapiens GN=ATP8A2                        |           |          |
| Q9NTI5                | PDS5B_HUMAN Sister chromatid cohesion protein PDS5 homolog B OS=Homo sapiens GN=PDS5B PE=1 SV=1                        |           | 61.75    |
| Q9NTI5-2              | PDS5B_HUMAN Isoform 2 of Sister chromatid cohesion protein PDS5 homolog B OS=Homo sapiens GN=PDS5B                     |           | 61.75    |
| Q9NTI5-3              | PDS5B_HUMAN Isoform 3 of Sister chromatid cohesion protein PDS5 homolog B OS=Homo sapiens GN=PDS5B                     |           | 30.64    |
| Q9NTI5-4              | PDS5B_HUMAN Isoform 4 of Sister chromatid cohesion protein PDS5 homolog B OS=Homo sapiens GN=PDS5B                     |           |          |
| Q9NTI5-5              | PDS5B_HUMAN Isoform 5 of Sister chromatid cohesion protein PDS5 homolog B OS=Homo sapiens GN=PDS5B                     |           |          |
| Q9NTI5;Q9NTI5-2       | PDS5B_HUMAN Sister chromatid cohesion protein PDS5 homolog B OS=Homo sapiens GN=PDS5B PE=1 SV=1;>sp Q9NTI5-2 PDS5B_    | 9.89E-209 |          |
| Q9NTJ3                | SMC4_HUMAN Structural maintenance of chromosomes protein 4 OS=Homo sapiens GN=SMC4 PE=1 SV=2                           |           | 141.98   |
| Q9NTJ3-2              | SMC4_HUMAN Isoform 2 of Structural maintenance of chromosomes protein 4 OS=Homo sapiens GN=SMC4                        |           | 129.47   |
| Q9NTJ3;Q9NTJ3-2       | SMC4_HUMAN Structural maintenance of chromosomes protein 4 OS=Homo sapiens GN=SMC4 PE=1 SV=2;>sp Q9NTJ3-2 SMC4_HUI     | 1.00E-76  |          |
| Q9NTJ4                | MA2C1_HUMAN Alpha-mannosidase 2C1 OS=Homo sapiens GN=MAN2C1 PE=1 SV=1                                                  |           |          |
| Q9NTJ5                | SAC1_HUMAN Phosphatidylinositol phosphatase SAC1 OS=Homo sapiens GN=SACM1L PE=1 SV=2                                   |           | 26.14    |
| Q9NTK5                | OLA1_HUMAN Olg-like ATPase 1 OS=Homo sapiens GN=OLA1 PE=1 SV=2                                                         |           | 245.36   |
| Q9NTK5-2              | OLA1_HUMAN Isoform 2 of Olg-like ATPase 1 OS=Homo sapiens GN=OLA1                                                      |           | 84.75    |
| Q9NTK5-3              | OLA1_HUMAN Isoform 3 of Olg-like ATPase 1 OS=Homo sapiens GN=OLA1                                                      |           | 169.26   |
| Q9NTK5;Q9NTK5-2       | OLA1_HUMAN Olg-like ATPase 1 OS=Homo sapiens GN=OLA1 PE=1 SV=2;>sp Q9NTK5-2 OLA1_HUMAN Isoform 2 of Olg-like ATPase    | 4.39E-126 |          |
| Q9NTX5;Q9NTX5-2       | ECHD1_HUMAN Enoyl-CoA hydratase domain-containing protein 1 OS=Homo sapiens GN=ECHDC1 PE=1 SV=2;>sp Q9NTX5-2 ECHD1     | 1.21E-32  |          |
| Q9NTZ6                | RBM12_HUMAN RNA-binding protein 12 OS=Homo sapiens GN=RBM12 PE=1 SV=1                                                  |           | 94.51    |
| Q9NU22                | MDN1_HUMAN Midasin OS=Homo sapiens GN=MDN1 PE=1 SV=2                                                                   |           |          |
| Q9NUB1;Q9NUB1-2       | ACS2L_HUMAN Acetyl-coenzyme A synthetase 2-like, mitochondrial OS=Homo sapiens GN=ACSS1 PE=1 SV=2;>sp Q9NUB1-2 ACS2L   | 7.11E-40  |          |
| Q9NUH8                | TM14B_HUMAN Transmembrane protein 14B OS=Homo sapiens GN=TMEM14B PE=2 SV=1                                             |           | 81.8     |

|                        |                                                                                                                     |           |        |
|------------------------|---------------------------------------------------------------------------------------------------------------------|-----------|--------|
| Q9NUI1;Q4VXZ8;Q9NUI1-  | DECR2_HUMAN Peroxisomal 2,4-dienoyl-CoA reductase OS=Homo sapiens GN=DECR2 PE=1 SV=1;>tr Q4VXZ8 Q4VXZ8_HUMAN 2,4-   | 2.06E-09  |        |
| Q9NUJ1                 | ABHDA_HUMAN Abhydrolase domain-containing protein 10, mitochondrial OS=Homo sapiens GN=ABHD10 PE=1 SV=1             |           | 224.6  |
| Q9NUJ7                 | PLCX1_HUMAN PI-PLC X domain-containing protein 1 OS=Homo sapiens GN=PLCX1 PE=2 SV=1                                 |           |        |
| Q9NUL3                 | STAU2_HUMAN Double-stranded RNA-binding protein Staufen homolog 2 OS=Homo sapiens GN=STAU2 PE=1 SV=1                |           | 55.63  |
| Q9NUL3-2               | STAU2_HUMAN Isoform 2 of Double-stranded RNA-binding protein Staufen homolog 2 OS=Homo sapiens GN=STAU2             |           | 55.63  |
| Q9NUL3-3               | STAU2_HUMAN Isoform 3 of Double-stranded RNA-binding protein Staufen homolog 2 OS=Homo sapiens GN=STAU2             |           | 55.63  |
| Q9NUL3-4               | STAU2_HUMAN Isoform 4 of Double-stranded RNA-binding protein Staufen homolog 2 OS=Homo sapiens GN=STAU2             |           | 60.46  |
| Q9NUL3;Q9NUL3-2;Q9NUI1 | STAU2_HUMAN Double-stranded RNA-binding protein Staufen homolog 2 OS=Homo sapiens GN=STAU2 PE=1 SV=1;>sp Q9NUL3-2 S | 4.84E-16  |        |
| Q9NUM4                 | T106B_HUMAN Transmembrane protein 106B OS=Homo sapiens GN=TMEM106B PE=1 SV=2                                        |           | 53.29  |
| Q9NUP9                 | LIN7C_HUMAN Protein lin-7 homolog C OS=Homo sapiens GN=LIN7C PE=1 SV=1                                              |           | 464.26 |
| Q9NUQ2                 | PLCE_HUMAN 1-acyl-sn-glycerol-3-phosphate acyltransferase epsilon OS=Homo sapiens GN=AGPAT5 PE=1 SV=3               |           | 45.48  |
| Q9NUQ3                 | TXLNG_HUMAN Gamma-taxilin OS=Homo sapiens GN=TXLNG PE=1 SV=2                                                        |           | 103.84 |
| Q9NUQ3-2               | TXLNG_HUMAN Isoform 2 of Gamma-taxilin OS=Homo sapiens GN=TXLNG                                                     |           | 59.1   |
| Q9NUQ3;Q9NUQ3-2        | TXLNG_HUMAN Gamma-taxilin OS=Homo sapiens GN=TXLNG PE=1 SV=2;>sp Q9NUQ3-2 TXLNG_HUMAN Isoform 2 of Gamma-taxilin    | 6.55E-12  |        |
| Q9NUQ6                 | SPS2L_HUMAN SPATS2-like protein OS=Homo sapiens GN=SPATS2L PE=1 SV=2                                                |           | 174.09 |
| Q9NUQ6-2               | SPS2L_HUMAN Isoform 2 of SPATS2-like protein OS=Homo sapiens GN=SPATS2L                                             |           | 185.1  |
| Q9NUQ7                 | UFSP2_HUMAN Ufm1-specific protease 2 OS=Homo sapiens GN=UFSP2 PE=2 SV=3                                             | 1.01E-16  |        |
| Q9NUQ8                 | ABCF3_HUMAN ATP-binding cassette sub-family F member 3 OS=Homo sapiens GN=ABCF3 PE=1 SV=2                           |           |        |
| Q9NUQ8-2               | ABCF3_HUMAN Isoform 2 of ATP-binding cassette sub-family F member 3 OS=Homo sapiens GN=ABCF3                        |           |        |
| Q9NUQ8;Q9NUQ8-2        | ABCF3_HUMAN ATP-binding cassette sub-family F member 3 OS=Homo sapiens GN=ABCF3 PE=1 SV=2;>sp Q9NUQ8-2 ABCF3_HUMA   | 1.92E-07  |        |
| Q9NUQ9                 | FA49B_HUMAN Protein FAM49B OS=Homo sapiens GN=FAM49B PE=1 SV=1                                                      |           | 144.19 |
| Q9NUS5                 | CT029_HUMAN Protein C20orf29 OS=Homo sapiens GN=C20orf29 PE=1 SV=1                                                  |           |        |
| Q9NUT2                 | ABCB8_HUMAN ATP-binding cassette sub-family B member 8, mitochondrial OS=Homo sapiens GN=ABCB8 PE=1 SV=3            |           |        |
| Q9NUT2-2               | ABCB8_HUMAN Isoform Short of ATP-binding cassette sub-family B member 8, mitochondrial OS=Homo sapiens GN=ABCB8     |           |        |
| Q9NUU7;Q9UMR2;Q9UMR    | DD19A_HUMAN ATP-dependent RNA helicase DDX19A OS=Homo sapiens GN=DDX19A PE=1 SV=1;>sp Q9UMR2 DD19B_HUMAN ATP        | 2.33E-62  |        |
| Q9NUV9                 | GIMA4_HUMAN GTPase IMAP family member 4 OS=Homo sapiens GN=GIMAP4 PE=1 SV=1                                         | 2.76E-49  |        |
| Q9NUY8;B9A6M5;Q9NUY8   | TBC23_HUMAN TBC1 domain family member 23 OS=Homo sapiens GN=TBC1D23 PE=1 SV=3;>tr B9A6M5 B9A6M5_HUMAN TBC1 do       | 3.41E-18  |        |
| Q9NV06                 | DCA13_HUMAN DDB1- and CUL4-associated factor 13 OS=Homo sapiens GN=DCAF13 PE=1 SV=2                                 |           |        |
| Q9NV06-2               | DCA13_HUMAN Isoform 2 of DDB1- and CUL4-associated factor 13 OS=Homo sapiens GN=DCAF13                              |           |        |
| Q9NV31                 | IMP3_HUMAN U3 small nucleolar ribonucleoprotein protein IMP3 OS=Homo sapiens GN=IMP3 PE=1 SV=1                      |           | 54.15  |
| Q9NV35                 | NUD15_HUMAN Probable 7,8-dihydro-8-oxoguanine triphosphatase NUDT15 OS=Homo sapiens GN=NUDT15 PE=1 SV=1             | 5.43E-18  |        |
| Q9NV56                 | MRGBP_HUMAN MRG-binding protein OS=Homo sapiens GN=MRGBP PE=1 SV=1                                                  |           | 111.98 |
| Q9NV70                 | EXOC1_HUMAN Exocyst complex component 1 OS=Homo sapiens GN=EXOC1 PE=1 SV=4                                          |           |        |
| Q9NV70-2               | EXOC1_HUMAN Isoform 2 of Exocyst complex component 1 OS=Homo sapiens GN=EXOC1                                       |           |        |
| Q9NV70;Q9NV70-2        | EXOC1_HUMAN Exocyst complex component 1 OS=Homo sapiens GN=EXOC1 PE=1 SV=4;>sp Q9NV70-2 EXOC1_HUMAN Isoform 2 c     | 8.37E-11  |        |
| Q9NV96                 | CC50A_HUMAN Cell cycle control protein 50A OS=Homo sapiens GN=TMEM30A PE=1 SV=1                                     |           | 50.36  |
| Q9NV96-2               | CC50A_HUMAN Isoform 2 of Cell cycle control protein 50A OS=Homo sapiens GN=TMEM30A                                  |           | 50.36  |
| Q9NV96-3               | CC50A_HUMAN Isoform 3 of Cell cycle control protein 50A OS=Homo sapiens GN=TMEM30A                                  |           | 50.36  |
| Q9NV96;Q9NV96-2;Q9NV96 | CC50A_HUMAN Cell cycle control protein 50A OS=Homo sapiens GN=TMEM30A PE=1 SV=1;>sp Q9NV96-2 CC50A_HUMAN Isoform 2  | 3.27E-17  |        |
| Q9NVA1                 | UQCC_HUMAN Ubiquinol-cytochrome c reductase complex chaperone CBP3 homolog OS=Homo sapiens GN=UQCC PE=1 SV=3        |           | 52.33  |
| Q9NVA1-2               | UQCC_HUMAN Isoform 2 of Ubiquinol-cytochrome c reductase complex chaperone CBP3 homolog OS=Homo sapiens GN=UQCC     |           | 52.33  |
| Q9NVA1-3               | UQCC_HUMAN Isoform 3 of Ubiquinol-cytochrome c reductase complex chaperone CBP3 homolog OS=Homo sapiens GN=UQCC     |           |        |
| Q9NVA1-4               | UQCC_HUMAN Isoform 4 of Ubiquinol-cytochrome c reductase complex chaperone CBP3 homolog OS=Homo sapiens GN=UQCC     |           |        |
| Q9NVA1;Q9NVA1-2        | UQCC_HUMAN Ubiquinol-cytochrome c reductase complex chaperone CBP3 homolog OS=Homo sapiens GN=UQCC PE=1 SV=3;>sp Q9 | 1.22E-09  |        |
| Q9NVA2                 | SEP11_HUMAN Septin-11 OS=Homo sapiens GN=SEPT11 PE=1 SV=3                                                           |           | 485.89 |
| Q9NVA2-2               | SEP11_HUMAN Isoform 2 of Septin-11 OS=Homo sapiens GN=SEPT11                                                        |           | 485.89 |
| Q9NVA2-2;D6RER5;Q9NV   | 2 SEP11_HUMAN Isoform 2 of Septin-11 OS=Homo sapiens GN=SEPT11;>tr D6RER5 D6RER5_HUMAN Uncharacterized protein OS=H | 1.87E-298 |        |
| Q9NVA2;Q9NVA2-2        | SEP11_HUMAN Septin-11 OS=Homo sapiens GN=SEPT11 PE=1 SV=3;>sp Q9NVA2-2 SEP11_HUMAN Isoform 2 of Septin-11 OS=Horr   | 6.35E-50  |        |
| Q9NVD7                 | PARVA_HUMAN Alpha-parvin OS=Homo sapiens GN=PARVA PE=1 SV=1                                                         |           | 363.91 |
| Q9NVD7-2               | PARVA_HUMAN Isoform 2 of Alpha-parvin OS=Homo sapiens GN=PARVA                                                      |           | 72.14  |
| Q9NVD7;B7Z952          | PARVA_HUMAN Alpha-parvin OS=Homo sapiens GN=PARVA PE=1 SV=1;>tr B7Z952 B7Z952_HUMAN cDNA FLJ54827, highly similar t | 5.87E-93  |        |
| Q9NVE4                 | CCD87_HUMAN Coiled-coil domain-containing protein 87 OS=Homo sapiens GN=CCDC87 PE=2 SV=2                            |           | 29.09  |
| Q9NVE7                 | PANK4_HUMAN Pantothenate kinase 4 OS=Homo sapiens GN=PANK4 PE=1 SV=1                                                | 7.33E-13  |        |
| Q9NVG8;Q9NVG8-2        | TBC13_HUMAN TBC1 domain family member 13 OS=Homo sapiens GN=TBC1D13 PE=1 SV=3;>sp Q9NVG8-2 TBC13_HUMAN Isoforrr     | 2.30E-13  |        |
| Q9NVH1                 | DJC11_HUMAN DnaJ homolog subfamily C member 11 OS=Homo sapiens GN=DNAJC11 PE=1 SV=2                                 |           |        |
| Q9NVH1-2               | DJC11_HUMAN Isoform 2 of DnaJ homolog subfamily C member 11 OS=Homo sapiens GN=DNAJC11                              |           |        |
| Q9NVH1-3               | DJC11_HUMAN Isoform 3 of DnaJ homolog subfamily C member 11 OS=Homo sapiens GN=DNAJC11                              |           |        |
| Q9NVH1;Q9NVH1-3;Q9NV   | DJC11_HUMAN DnaJ homolog subfamily C member 11 OS=Homo sapiens GN=DNAJC11 PE=1 SV=2;>sp Q9NVH1-3 DJC11_HUMAN I:     | 5.39E-11  |        |
| Q9NVH2                 | INT7_HUMAN Integrator complex subunit 7 OS=Homo sapiens GN=INTS7 PE=1 SV=1                                          |           | 29.57  |
| Q9NVH2-2               | INT7_HUMAN Isoform 2 of Integrator complex subunit 7 OS=Homo sapiens GN=INTS7                                       |           | 29.57  |
| Q9NVH2-3               | INT7_HUMAN Isoform 3 of Integrator complex subunit 7 OS=Homo sapiens GN=INTS7                                       |           | 29.57  |

|                          |                                                                                                                       |           |        |
|--------------------------|-----------------------------------------------------------------------------------------------------------------------|-----------|--------|
| Q9NVH6;Q9NVH6-2          | TMLH_HUMAN Trimethyllysine dioxygenase, mitochondrial OS=Homo sapiens GN=TMLHE PE=1 SV=1;>sp Q9NVH6-2 TMLH_HUMAN I:   | 3.32E-05  |        |
| Q9NVI1                   | FANCI_HUMAN Fanconi anemia group I protein OS=Homo sapiens GN=FANCI PE=1 SV=4                                         |           | 81.81  |
| Q9NVI1-1                 | FANCI_HUMAN Isoform 1 of Fanconi anemia group I protein OS=Homo sapiens GN=FANCI                                      |           | 81.81  |
| Q9NVI1-2                 | FANCI_HUMAN Isoform 2 of Fanconi anemia group I protein OS=Homo sapiens GN=FANCI                                      |           | 81.81  |
| Q9NVI1-4                 | FANCI_HUMAN Isoform 4 of Fanconi anemia group I protein OS=Homo sapiens GN=FANCI                                      |           | 3.4    |
| Q9NVI1;Q9NVI1-1;Q9NVI1-2 | FANCI_HUMAN Fanconi anemia group I protein OS=Homo sapiens GN=FANCI PE=1 SV=4;>sp Q9NVI1-1 FANCI_HUMAN Isoform 1 of   | 7.79E-120 |        |
| Q9NVI7                   | ATD3A_HUMAN ATPase family AAA domain-containing protein 3A OS=Homo sapiens GN=ATAD3A PE=1 SV=2                        |           | 464.12 |
| Q9NVI7-2                 | ATD3A_HUMAN Isoform 2 of ATPase family AAA domain-containing protein 3A OS=Homo sapiens GN=ATAD3A                     |           | 565.37 |
| Q9NVI7-2;Q9NVI7          | 2 ATD3A_HUMAN Isoform 2 of ATPase family AAA domain-containing protein 3A OS=Homo sapiens GN=ATAD3A;>sp Q9NVI7 ATD3A_ | 5.25E-139 |        |
| Q9NVJ2                   | ARL8B_HUMAN ADP-ribosylation factor-like protein 8B OS=Homo sapiens GN=ARL8B PE=1 SV=1                                |           | 315.84 |
| Q9NVM6                   | DJC17_HUMAN DnaJ homolog subfamily C member 17 OS=Homo sapiens GN=DNAJC17 PE=1 SV=1                                   |           | 40.01  |
| Q9NVM9                   | M89BB_HUMAN Cell cycle regulator Mat89Bb homolog OS=Homo sapiens GN=C12orf11 PE=1 SV=2                                | 8.23E-16  |        |
| Q9NVN3                   | RIC8B_HUMAN Synembryn-B OS=Homo sapiens GN=RIC8B PE=1 SV=2                                                            |           |        |
| Q9NVN3-1                 | RIC8B_HUMAN Isoform 1 of Synembryn-B OS=Homo sapiens GN=RIC8B                                                         |           |        |
| Q9NVN3-1;Q9NVN3;Q9NVN3-3 | 1 RIC8B_HUMAN Isoform 1 of Synembryn-B OS=Homo sapiens GN=RIC8B;>sp Q9NVN3 RIC8B_HUMAN Synembryn-B OS=Homo sap        | 1.20E-10  |        |
| Q9NVN3-3                 | RIC8B_HUMAN Isoform 3 of Synembryn-B OS=Homo sapiens GN=RIC8B                                                         |           |        |
| Q9NVN3-4                 | RIC8B_HUMAN Isoform 4 of Synembryn-B OS=Homo sapiens GN=RIC8B                                                         |           |        |
| Q9NVN8                   | GNL3L_HUMAN Guanine nucleotide-binding protein-like 3-like protein OS=Homo sapiens GN=GNL3L PE=1 SV=1                 |           | 15.11  |
| Q9NVP1                   | DDX18_HUMAN ATP-dependent RNA helicase DDX18 OS=Homo sapiens GN=DDX18 PE=1 SV=2                                       |           | 232.56 |
| Q9NVP2                   | ASF1B_HUMAN Histone chaperone ASF1B OS=Homo sapiens GN=ASF1B PE=1 SV=1                                                | 1.52E-11  |        |
| Q9NVR0                   | KLH11_HUMAN Kelch-like protein 11 OS=Homo sapiens GN=KLHL11 PE=1 SV=1                                                 |           |        |
| Q9NVR2                   | INT10_HUMAN Integrator complex subunit 10 OS=Homo sapiens GN=INTS10 PE=1 SV=2                                         |           |        |
| Q9NVR7                   | TBCC1_HUMAN TBCC domain-containing protein 1 OS=Homo sapiens GN=TBCCD1 PE=1 SV=1                                      |           |        |
| Q9NVS2-2;Q9NVS2          | 2 RT18A_HUMAN Isoform 2 of 28S ribosomal protein S18a, mitochondrial OS=Homo sapiens GN=MRPS18A;>sp Q9NVS2 RT18A_HUM  | 5.23E-06  |        |
| Q9NVS9                   | PNPO_HUMAN Pyridoxine-5'-phosphate oxidase OS=Homo sapiens GN=PNPO PE=1 SV=1                                          |           | 25.56  |
| Q9NVU7                   | SDA1_HUMAN Protein SDA1 homolog OS=Homo sapiens GN=SDAD1 PE=1 SV=3                                                    |           | 137.25 |
| Q9NVU7-2                 | SDA1_HUMAN Isoform 2 of Protein SDA1 homolog OS=Homo sapiens GN=SDAD1                                                 |           | 95.9   |
| Q9NVU7;B4DT66;Q9NVU7     | SDA1_HUMAN Protein SDA1 homolog OS=Homo sapiens GN=SDAD1 PE=1 SV=3;>tr B4DT66 B4DT66_HUMAN cDNA FLJ55367, highl       | 1.02E-10  |        |
| Q9NVV4-2                 | PAPD1_HUMAN Isoform 2 of Poly(A) RNA polymerase, mitochondrial OS=Homo sapiens GN=MTPAP                               |           |        |
| Q9NVV4-2;D3DRX0;Q9NVV4-2 | 2 PAPD1_HUMAN Isoform 2 of Poly(A) RNA polymerase, mitochondrial OS=Homo sapiens GN=MTPAP;>tr D3DRX0 D3DRX0_HUMAN P   | 2.21E-14  |        |
| Q9NVV5                   | AIG1_HUMAN Androgen-induced gene 1 protein OS=Homo sapiens GN=AIG1 PE=2 SV=2                                          |           | 23.41  |
| Q9NVV5-2                 | AIG1_HUMAN Isoform 2 of Androgen-induced gene 1 protein OS=Homo sapiens GN=AIG1                                       |           | 23.41  |
| Q9NVV5-3                 | AIG1_HUMAN Isoform 3 of Androgen-induced gene 1 protein OS=Homo sapiens GN=AIG1                                       |           | 23.41  |
| Q9NVV5-4                 | AIG1_HUMAN Isoform 4 of Androgen-induced gene 1 protein OS=Homo sapiens GN=AIG1                                       |           | 3.07   |
| Q9NVV5-5                 | AIG1_HUMAN Isoform 5 of Androgen-induced gene 1 protein OS=Homo sapiens GN=AIG1                                       |           | 23.41  |
| Q9NVX0                   | HAUS2_HUMAN HAUS augmin-like complex subunit 2 OS=Homo sapiens GN=HAUS2 PE=1 SV=1                                     |           |        |
| Q9NVX0-3                 | HAUS2_HUMAN Isoform 3 of HAUS augmin-like complex subunit 2 OS=Homo sapiens GN=HAUS2                                  |           |        |
| Q9NVX0;C9JH36;Q9NVX0     | HAUS2_HUMAN HAUS augmin-like complex subunit 2 OS=Homo sapiens GN=HAUS2 PE=1 SV=1;>tr C9JH36 C9JH36_HUMAN Unchar      | 3.54E-08  |        |
| Q9NVX2                   | NLE1_HUMAN Notchless protein homolog 1 OS=Homo sapiens GN=NLE1 PE=1 SV=4                                              |           | 19.14  |
| Q9NVZ3                   | NECP2_HUMAN Adaptin ear-binding coat-associated protein 2 OS=Homo sapiens GN=NECAP2 PE=1 SV=1                         |           | 24.87  |
| Q9NVZ3-2                 | NECP2_HUMAN Isoform 2 of Adaptin ear-binding coat-associated protein 2 OS=Homo sapiens GN=NECAP2                      |           | 24.87  |
| Q9NVZ3-3                 | NECP2_HUMAN Isoform 3 of Adaptin ear-binding coat-associated protein 2 OS=Homo sapiens GN=NECAP2                      |           | 15.77  |
| Q9NVZ3;Q9NVZ3-2;Q9NVZ3-3 | NECP2_HUMAN Adaptin ear-binding coat-associated protein 2 OS=Homo sapiens GN=NECAP2 PE=1 SV=1;>sp Q9NVZ3-2 NECP2_HUI  | 2.79E-11  |        |
| Q9NW08                   | RPC2_HUMAN DNA-directed RNA polymerase III subunit RPC2 OS=Homo sapiens GN=POLR3B PE=1 SV=2                           |           |        |
| Q9NW13                   | RBM28_HUMAN RNA-binding protein 28 OS=Homo sapiens GN=RBM28 PE=1 SV=3                                                 |           | 52.6   |
| Q9NW64                   | RBM22_HUMAN Pre-mRNA-splicing factor RBM22 OS=Homo sapiens GN=RBM22 PE=1 SV=1                                         | 1.16E-09  |        |
| Q9NW68;Q9NW68-2;C9JB     | BSDC1_HUMAN BSD domain-containing protein 1 OS=Homo sapiens GN=BSDC1 PE=1 SV=1;>sp Q9NW68-2 BSDC1_HUMAN Isoform       | 6.38E-12  |        |
| Q9NWB6                   | ARGL1_HUMAN Arginine and glutamate-rich protein 1 OS=Homo sapiens GN=ARGLU1 PE=1 SV=1                                 |           |        |
| Q9NWB6-2                 | ARGL1_HUMAN Isoform 2 of Arginine and glutamate-rich protein 1 OS=Homo sapiens GN=ARGLU1                              |           |        |
| Q9NWB6;Q9NWB6-2          | ARGL1_HUMAN Arginine and glutamate-rich protein 1 OS=Homo sapiens GN=ARGLU1 PE=1 SV=1;>sp Q9NWB6-2 ARGL1_HUMAN Iso    | 5.20E-06  |        |
| Q9NWF9                   | RN216_HUMAN E3 ubiquitin-protein ligase RNF216 OS=Homo sapiens GN=RNF216 PE=1 SV=3                                    |           |        |
| Q9NWF9-1                 | RN216_HUMAN Isoform 2 of E3 ubiquitin-protein ligase RNF216 OS=Homo sapiens GN=RNF216                                 |           |        |
| Q9NWF9-3                 | RN216_HUMAN Isoform 3 of E3 ubiquitin-protein ligase RNF216 OS=Homo sapiens GN=RNF216                                 |           |        |
| Q9NWH9;C9IZZ3            | SLTM_HUMAN SAFB-like transcription modulator OS=Homo sapiens GN=SLTM PE=1 SV=2;>tr C9IZZ3 C9IZZ3_HUMAN Uncharacterize | 3.74E-23  |        |
| Q9NWS0                   | PIHD1_HUMAN PIH1 domain-containing protein 1 OS=Homo sapiens GN=PIH1D1 PE=1 SV=1                                      | 5.08E-05  |        |
| Q9NWS8                   | RMND1_HUMAN Required for meiotic nuclear division protein 1 homolog OS=Homo sapiens GN=RMND1 PE=1 SV=2                |           |        |
| Q9NWS8-2                 | RMND1_HUMAN Isoform 2 of Required for meiotic nuclear division protein 1 homolog OS=Homo sapiens GN=RMND1             |           |        |
| Q9NWS8-3                 | RMND1_HUMAN Isoform 3 of Required for meiotic nuclear division protein 1 homolog OS=Homo sapiens GN=RMND1             |           |        |
| Q9NWS8;Q9NWS8-2          | RMND1_HUMAN Required for meiotic nuclear division protein 1 homolog OS=Homo sapiens GN=RMND1 PE=1 SV=2;>sp Q9NWS8-2 F | 7.43E-07  |        |
| Q9NWT1                   | PK1IP_HUMAN p21-activated protein kinase-interacting protein 1 OS=Homo sapiens GN=PAK1IP1 PE=1 SV=2                   |           |        |
| Q9NWU2                   | CT011_HUMAN Protein C20orf11 OS=Homo sapiens GN=C20orf11 PE=1 SV=1                                                    |           | 94.76  |

|                        |                                                                                                                                 |          |        |
|------------------------|---------------------------------------------------------------------------------------------------------------------------------|----------|--------|
| Q9NWU5                 | RM22_HUMAN 39S ribosomal protein L22, mitochondrial OS=Homo sapiens GN=MRPL22 PE=1 SV=1                                         |          | 94.74  |
| Q9NWU5-2               | RM22_HUMAN Isoform 2 of 39S ribosomal protein L22, mitochondrial OS=Homo sapiens GN=MRPL22                                      |          | 63.8   |
| Q9NWU5;A6NGJ8;Q9NWU    | RM22_HUMAN 39S ribosomal protein L22, mitochondrial OS=Homo sapiens GN=MRPL22 PE=1 SV=1;>tr A6NGJ8 A6NGJ8_HUMAN Un              | 6.91E-13 |        |
| Q9NWW4                 | CA123_HUMAN UPF0587 protein C1orf123 OS=Homo sapiens GN=C1orf123 PE=1 SV=1                                                      | 5.94E-18 |        |
| Q9NWW8;C9J462;Q9NWW    | MRI40_HUMAN BRCA1-A complex subunit MERIT40 OS=Homo sapiens GN=MERIT40 PE=1 SV=1;>tr C9J462 C9J462_HUMAN Unchar                 | 2.44E-06 |        |
| Q9NWW8;Q9NWW8-3        | BABA1_HUMAN BRISC and BRCA1-A complex member 1 OS=Homo sapiens GN=BABAM1 PE=1 SV=1;>sp Q9NWW8-3 BABA1_HUMAN                     | 1.39E-21 |        |
| Q9NWW9                 | HRSL2_HUMAN HRAS-like suppressor 2 OS=Homo sapiens GN=HRASLS2 PE=1 SV=1                                                         |          |        |
| Q9NWX6                 | THG1_HUMAN Probable tRNA(His) guanylyltransferase OS=Homo sapiens GN=THG1L PE=1 SV=2                                            | 4.09E-13 |        |
| Q9NWX5                 | UCKL1_HUMAN Uridine-cytidine kinase-like 1 OS=Homo sapiens GN=UCKL1 PE=1 SV=2                                                   |          |        |
| Q9NWX5-2               | UCKL1_HUMAN Isoform 2 of Uridine-cytidine kinase-like 1 OS=Homo sapiens GN=UCKL1                                                |          |        |
| Q9NWX5-3               | UCKL1_HUMAN Isoform 3 of Uridine-cytidine kinase-like 1 OS=Homo sapiens GN=UCKL1                                                |          |        |
| Q9NX00                 | TM160_HUMAN Transmembrane protein 160 OS=Homo sapiens GN=TMEM160 PE=2 SV=1                                                      |          | 22.3   |
| Q9NX08                 | COMD8_HUMAN COMM domain-containing protein 8 OS=Homo sapiens GN=COMMD8 PE=1 SV=1                                                | 2.36E-08 |        |
| Q9NX14                 | NDUBB_HUMAN NADH dehydrogenase [ubiquinone] 1 beta subcomplex subunit 11, mitochondrial OS=Homo sapiens GN=NDUFB11 PE=1 SV=1    |          | 61.57  |
| Q9NX14-2               | NDUBB_HUMAN Isoform 2 of NADH dehydrogenase [ubiquinone] 1 beta subcomplex subunit 11, mitochondrial OS=Homo sapiens GN=NDUFB11 |          | 61.57  |
| Q9NX14-2;Q9NX14        | 2 NDUBB_HUMAN Isoform 2 of NADH dehydrogenase [ubiquinone] 1 beta subcomplex subunit 11, mitochondrial OS=Homo sapiens GI       | 4.89E-09 |        |
| Q9NX18                 | SDHF2_HUMAN Succinate dehydrogenase assembly factor 2, mitochondrial OS=Homo sapiens GN=SDHAF2 PE=1 SV=1                        | 2.73E-06 |        |
| Q9NX20                 | RM16_HUMAN 39S ribosomal protein L16, mitochondrial OS=Homo sapiens GN=MRPL16 PE=1 SV=1                                         |          | 35.4   |
| Q9NX24                 | NHP2_HUMAN H/ACA ribonucleoprotein complex subunit 2 OS=Homo sapiens GN=NHP2 PE=1 SV=1                                          |          | 206.72 |
| Q9NX40                 | OCAD1_HUMAN OCIA domain-containing protein 1 OS=Homo sapiens GN=OCIAD1 PE=1 SV=1                                                |          | 274.17 |
| Q9NX40-2               | OCAD1_HUMAN Isoform 2 of OCIA domain-containing protein 1 OS=Homo sapiens GN=OCIAD1                                             |          | 202.83 |
| Q9NX40-3               | OCAD1_HUMAN Isoform 3 of OCIA domain-containing protein 1 OS=Homo sapiens GN=OCIAD1                                             |          | 202.83 |
| Q9NX40;D6RBN5;C9K030   | OCAD1_HUMAN OCIA domain-containing protein 1 OS=Homo sapiens GN=OCIAD1 PE=1 SV=1;>tr D6RBN5 D6RBN5_HUMAN Unchar                 | 2.38E-15 |        |
| Q9NX46                 | ARHL2_HUMAN Poly(ADP-ribose) glycohydrolase ARH3 OS=Homo sapiens GN=ADPRHL2 PE=1 SV=1                                           | 3.84E-62 |        |
| Q9NX47                 | MARH5_HUMAN E3 ubiquitin-protein ligase MARCH5 OS=Homo sapiens GN=MARCH5 PE=1 SV=1                                              | 5.99E-14 |        |
| Q9NX55                 | HYPK_HUMAN Huntingtin-interacting protein K OS=Homo sapiens GN=HYPK PE=1 SV=2                                                   |          | 46.51  |
| Q9NX58                 | LYAR_HUMAN Cell growth-regulating nucleolar protein OS=Homo sapiens GN=LYAR PE=1 SV=2                                           |          | 78.33  |
| Q9NX61                 | T161A_HUMAN Transmembrane protein 161A OS=Homo sapiens GN=TMEM161A PE=2 SV=1                                                    |          |        |
| Q9NX62                 | IMPA3_HUMAN Inositol monophosphatase 3 OS=Homo sapiens GN=IMPAD1 PE=1 SV=1                                                      |          |        |
| Q9NX63                 | CHCH3_HUMAN Coiled-coil-helix-coiled-coil-helix domain-containing protein 3, mitochondrial OS=Homo sapiens GN=CHCHD3 PE=1 SV=1  |          | 312.99 |
| Q9NX70                 | MED29_HUMAN Mediator of RNA polymerase II transcription subunit 29 OS=Homo sapiens GN=MED29 PE=1 SV=1                           | 3.14E-20 |        |
| Q9NX74                 | DUS2L_HUMAN tRNA-dihydrouridine synthase 2-like OS=Homo sapiens GN=DUS2L PE=1 SV=1                                              |          | 21.56  |
| Q9NX76                 | CKLF6_HUMAN CKLF-like MARVEL transmembrane domain-containing protein 6 OS=Homo sapiens GN=CMTM6 PE=1 SV=1                       |          | 29.24  |
| Q9NXA8-2               | SIRT5_HUMAN Isoform 2 of NAD-dependent deacetylase sirtuin-5 OS=Homo sapiens GN=SIRT5                                           |          | 13.57  |
| Q9NXA8;Q9NXA8-2        | SIRT5_HUMAN NAD-dependent deacetylase sirtuin-5 OS=Homo sapiens GN=SIRT5 PE=1 SV=2;>sp Q9NXA8-2 SIRT5_HUMAN Isoforr             | 1.44E-08 |        |
| Q9NXB9                 | ELOV2_HUMAN Elongation of very long chain fatty acids protein 2 OS=Homo sapiens GN=ELOVL2 PE=2 SV=2                             |          |        |
| Q9NXE4-4;Q9NXE4;Q9NXI4 | NSMA3_HUMAN Isoform 4 of Sphingomyelin phosphodiesterase 4 OS=Homo sapiens GN=SMPD4;>sp Q9NXE4 NSMA3_HUMAN Sphi                 | 4.96E-33 |        |
| Q9NXF1                 | TEX10_HUMAN Testis-expressed sequence 10 protein OS=Homo sapiens GN=TEX10 PE=1 SV=2                                             |          |        |
| Q9NXG0                 | CNTLN_HUMAN Centlein OS=Homo sapiens GN=CNTLN PE=2 SV=5                                                                         |          |        |
| Q9NXG0-2               | CNTLN_HUMAN Isoform 2 of Centlein OS=Homo sapiens GN=CNTLN                                                                      |          |        |
| Q9NXG0-2;Q9NXG0;Q9NX   | 2 CNTLN_HUMAN Isoform 2 of Centlein OS=Homo sapiens GN=CNTLN;>sp Q9NXG0 CNTLN_HUMAN Centlein OS=Homo sapiens GN=                | 8.68E-09 |        |
| Q9NXG0-3               | CNTLN_HUMAN Isoform 3 of Centlein OS=Homo sapiens GN=CNTLN                                                                      |          |        |
| Q9NXG2                 | THUM1_HUMAN THUMP domain-containing protein 1 OS=Homo sapiens GN=THUMPD1 PE=1 SV=2                                              |          | 45.1   |
| Q9NXH8                 | CI167_HUMAN Torsin family protein C9orf167 OS=Homo sapiens GN=C9orf167 PE=1 SV=2                                                | 9.53E-14 |        |
| Q9NXH9                 | TRM1_HUMAN N(2),N(2)-dimethylguanosine tRNA methyltransferase OS=Homo sapiens GN=TRMT1 PE=1 SV=1                                |          | 28.82  |
| Q9NXH9-2               | TRM1_HUMAN Isoform 2 of N(2),N(2)-dimethylguanosine tRNA methyltransferase OS=Homo sapiens GN=TRMT1                             |          | 28.82  |
| Q9NXH9;Q9NXH9-2        | TRM1_HUMAN N(2),N(2)-dimethylguanosine tRNA methyltransferase OS=Homo sapiens GN=TRMT1 PE=1 SV=1;>sp Q9NXH9-2 TRM1              | 3.16E-09 |        |
| Q9NXR1                 | NDE1_HUMAN Nuclear distribution protein nudE homolog 1 OS=Homo sapiens GN=NDE1 PE=1 SV=2                                        |          |        |
| Q9NXR1-2               | NDE1_HUMAN Isoform 2 of Nuclear distribution protein nudE homolog 1 OS=Homo sapiens GN=NDE1                                     |          |        |
| Q9NXR7                 | BRE_HUMAN BRCA1-A complex subunit BRE OS=Homo sapiens GN=BRE PE=1 SV=2                                                          |          | 55.58  |
| Q9NXR7-1               | BRE_HUMAN Isoform 1 of BRCA1-A complex subunit BRE OS=Homo sapiens GN=BRE                                                       |          | 55.58  |
| Q9NXR7-1;D6W562;Q9NX   | 1 BRE_HUMAN Isoform 1 of BRCA1-A complex subunit BRE OS=Homo sapiens GN=BRE;>tr D6W562 D6W562_HUMAN Brain and repr              | 2.80E-15 |        |
| Q9NXR7-3               | BRE_HUMAN Isoform 3 of BRCA1-A complex subunit BRE OS=Homo sapiens GN=BRE                                                       |          | 55.58  |
| Q9NXR7-4               | BRE_HUMAN Isoform 4 of BRCA1-A complex subunit BRE OS=Homo sapiens GN=BRE                                                       |          | 55.58  |
| Q9NXS2                 | QPCTL_HUMAN Glutaminyl-peptide cyclotransferase-like protein OS=Homo sapiens GN=QPCTL PE=1 SV=2                                 |          | 114.49 |
| Q9NXV2                 | KCTD5_HUMAN BTB/POZ domain-containing protein KCTD5 OS=Homo sapiens GN=KCTD5 PE=1 SV=1                                          | 4.45E-05 |        |
| Q9NXV6                 | CARF_HUMAN CDKN2A-interacting protein OS=Homo sapiens GN=CDKN2AIP PE=1 SV=3                                                     |          | 157.2  |
| Q9NXW2                 | DJB12_HUMAN DnaJ homolog subfamily B member 12 OS=Homo sapiens GN=DNAJB12 PE=1 SV=4                                             |          | 26.32  |
| Q9NXW2-2               | DJB12_HUMAN Isoform 2 of DnaJ homolog subfamily B member 12 OS=Homo sapiens GN=DNAJB12                                          |          | 26.32  |
| Q9NXW2-2;Q9NXW2        | 2 DJB12_HUMAN Isoform 2 of DnaJ homolog subfamily B member 12 OS=Homo sapiens GN=DNAJB12;>sp Q9NXW2 DJB12_HUMAN                 | 6.49E-10 |        |
| Q9NXW9                 | ALKB4_HUMAN Probable alpha-ketoglutarate-dependent dioxygenase ABH4 OS=Homo sapiens GN=ALKBH4 PE=1 SV=1                         |          |        |



|                        |                                                                                                                         |           |        |
|------------------------|-------------------------------------------------------------------------------------------------------------------------|-----------|--------|
| Q9NY12                 | GAR1_HUMAN H/ACA ribonucleoprotein complex subunit 1 OS=Homo sapiens GN=GAR1 PE=1 SV=1                                  |           | 98.33  |
| Q9NY12-2               | GAR1_HUMAN Isoform 2 of H/ACA ribonucleoprotein complex subunit 1 OS=Homo sapiens GN=GAR1                               |           | 98.33  |
| Q9NY12;Q9NY12-2        | GAR1_HUMAN H/ACA ribonucleoprotein complex subunit 1 OS=Homo sapiens GN=GAR1 PE=1 SV=1;>sp Q9NY12-2 GAR1_HUMAN Isof     | 1.38E-10  |        |
| Q9NY15                 | STAB1_HUMAN Stabilin-1 OS=Homo sapiens GN=STAB1 PE=1 SV=3                                                               | 3.64E-19  |        |
| Q9NY27;Q9NY27-2;Q9NY27 | PPP4R2_HUMAN Serine/threonine-protein phosphatase 4 regulatory subunit 2 OS=Homo sapiens GN=PPP4R2 PE=1 SV=3;>sp Q9NY27 | 6.49E-20  |        |
| Q9NY28                 | GALT8_HUMAN Probable polypeptide N-acetylgalactosaminyltransferase 8 OS=Homo sapiens GN=GALT8 PE=2 SV=1                 |           |        |
| Q9NY33                 | DPP3_HUMAN Dipeptidyl peptidase 3 OS=Homo sapiens GN=DPP3 PE=1 SV=2                                                     | 1.13E-142 |        |
| Q9NY35;Q9NY35-2        | CLDN1_HUMAN Claudin domain-containing protein 1 OS=Homo sapiens GN=CLDN1 PE=1 SV=1;>sp Q9NY35-2 CLDN1_HUMAN Isof        | 3.67E-09  |        |
| Q9NY47                 | CA2D2_HUMAN Voltage-dependent calcium channel subunit alpha-2/delta-2 OS=Homo sapiens GN=CACNA2D2 PE=1 SV=1             |           |        |
| Q9NY47-2               | CA2D2_HUMAN Isoform 2 of Voltage-dependent calcium channel subunit alpha-2/delta-2 OS=Homo sapiens GN=CACNA2D2          |           |        |
| Q9NY47-3               | CA2D2_HUMAN Isoform 3 of Voltage-dependent calcium channel subunit alpha-2/delta-2 OS=Homo sapiens GN=CACNA2D2          |           |        |
| Q9NY47-4               | CA2D2_HUMAN Isoform 4 of Voltage-dependent calcium channel subunit alpha-2/delta-2 OS=Homo sapiens GN=CACNA2D2          |           |        |
| Q9NY47-5               | CA2D2_HUMAN Isoform 5 of Voltage-dependent calcium channel subunit alpha-2/delta-2 OS=Homo sapiens GN=CACNA2D2          |           |        |
| Q9NY61                 | AATF_HUMAN Protein AATF OS=Homo sapiens GN=AATF PE=1 SV=1                                                               |           |        |
| Q9NY65                 | TBA8_HUMAN Tubulin alpha-8 chain OS=Homo sapiens GN=TUBA8 PE=1 SV=1                                                     |           | 839.57 |
| Q9NY91                 | SLC5A4_HUMAN Low affinity sodium-glucose cotransporter OS=Homo sapiens GN=SLC5A4 PE=2 SV=1                              |           |        |
| Q9NY93                 | DDX56_HUMAN Probable ATP-dependent RNA helicase DDX56 OS=Homo sapiens GN=DDX56 PE=1 SV=1                                |           |        |
| Q9NYB0                 | TE2IP_HUMAN Telomeric repeat-binding factor 2-interacting protein 1 OS=Homo sapiens GN=TERF2IP PE=1 SV=1                |           |        |
| Q9NYB9;B4DSN1;Q9NYB9   | ABI2_HUMAN Abl interactor 2 OS=Homo sapiens GN=ABI2 PE=1 SV=1;>tr B4DSN1 B4DSN1_HUMAN cDNA FLJ59236, highly similar t   | 1.24E-54  |        |
| Q9NYF0                 | DACT1_HUMAN Dapper homolog 1 OS=Homo sapiens GN=DACT1 PE=2 SV=2                                                         |           |        |
| Q9NYF8                 | BCLF1_HUMAN Bcl-2-associated transcription factor 1 OS=Homo sapiens GN=BCLAF1 PE=1 SV=2                                 |           |        |
| Q9NYF8-2               | BCLF1_HUMAN Isoform 2 of Bcl-2-associated transcription factor 1 OS=Homo sapiens GN=BCLAF1                              |           |        |
| Q9NYF8-3               | BCLF1_HUMAN Isoform 3 of Bcl-2-associated transcription factor 1 OS=Homo sapiens GN=BCLAF1                              |           |        |
| Q9NYF8-4               | BCLF1_HUMAN Isoform 4 of Bcl-2-associated transcription factor 1 OS=Homo sapiens GN=BCLAF1                              |           |        |
| Q9NYF8;Q9NYF8-2;Q9NYF8 | BCLF1_HUMAN Bcl-2-associated transcription factor 1 OS=Homo sapiens GN=BCLAF1 PE=1 SV=2;>sp Q9NYF8-2 BCLF1_HUMAN Isof   | 2.87E-55  |        |
| Q9NYH9                 | UTP6_HUMAN U3 small nucleolar RNA-associated protein 6 homolog OS=Homo sapiens GN=UTP6 PE=1 SV=2                        |           | 47.3   |
| Q9NYK1                 | TLR7_HUMAN Toll-like receptor 7 OS=Homo sapiens GN=TLR7 PE=1 SV=1                                                       |           |        |
| Q9NYK5                 | RM39_HUMAN 39S ribosomal protein L39, mitochondrial OS=Homo sapiens GN=MRPL39 PE=1 SV=3                                 |           | 85.32  |
| Q9NYK5-2               | RM39_HUMAN Isoform 2 of 39S ribosomal protein L39, mitochondrial OS=Homo sapiens GN=MRPL39                              |           | 85.32  |
| Q9NYK5-2;Q9NYK5        | 2 RM39_HUMAN Isoform 2 of 39S ribosomal protein L39, mitochondrial OS=Homo sapiens GN=MRPL39;>sp Q9NYK5 RM39_HUMAN 3    | 3.68E-16  |        |
| Q9NYL2-2               | 2 MLTK_HUMAN Isoform 2 of Mitogen-activated protein kinase kinase kinase MLT OS=Homo sapiens GN=MLTK                    | 3.67E-13  |        |
| Q9NYL4                 | FKBP11_HUMAN Peptidyl-prolyl cis-trans isomerase FKBP11 OS=Homo sapiens GN=FKBP11 PE=1 SV=1                             |           | 32.28  |
| Q9NYL9                 | TMOD3_HUMAN Tropomodulin-3 OS=Homo sapiens GN=TMOD3 PE=1 SV=1                                                           |           | 148.87 |
| Q9NYP3                 | DONS_HUMAN Protein downstream neighbor of Son OS=Homo sapiens GN=DONSON PE=1 SV=2                                       |           |        |
| Q9NYP3-2               | DONS_HUMAN Isoform 2 of Protein downstream neighbor of Son OS=Homo sapiens GN=DONSON                                    |           |        |
| Q9NYP3-3               | DONS_HUMAN Isoform 3 of Protein downstream neighbor of Son OS=Homo sapiens GN=DONSON                                    |           |        |
| Q9NYP7                 | ELOV5_HUMAN Elongation of very long chain fatty acids protein 5 OS=Homo sapiens GN=ELOVL5 PE=1 SV=1                     |           |        |
| Q9NYQ6                 | CELSR1_HUMAN Cadherin EGF LAG seven-pass G-type receptor 1 OS=Homo sapiens GN=CELSR1 PE=1 SV=1                          | 2.94E-05  |        |
| Q9NYS0                 | KBR1_HUMAN NF-kappa-B inhibitor-interacting Ras-like protein 1 OS=Homo sapiens GN=NKIRAS1 PE=1 SV=1                     | 8.31E-08  |        |
| Q9NYT0                 | PLEK2_HUMAN Pleckstrin-2 OS=Homo sapiens GN=PLEK2 PE=1 SV=1                                                             | 2.00E-09  |        |
| Q9NYU2                 | UGGT1_HUMAN UDP-glucose:glycoprotein glucosyltransferase 1 OS=Homo sapiens GN=UGGT1 PE=1 SV=3                           |           | 468.39 |
| Q9NYU2-2               | UGGT1_HUMAN Isoform 2 of UDP-glucose:glycoprotein glucosyltransferase 1 OS=Homo sapiens GN=UGGT1                        |           | 468.39 |
| Q9NYU2;A8KAK1;Q9NYU2   | UGGT1_HUMAN UDP-glucose:glycoprotein glucosyltransferase 1 OS=Homo sapiens GN=UGGT1 PE=1 SV=3;>tr A8KAK1 A8KAK1_HUI     | 1.05E-118 |        |
| Q9NYV4                 | CDK12_HUMAN Cyclin-dependent kinase 12 OS=Homo sapiens GN=CDK12 PE=1 SV=2                                               |           | 93.26  |
| Q9NYV4-2               | CDK12_HUMAN Isoform 2 of Cyclin-dependent kinase 12 OS=Homo sapiens GN=CDK12                                            |           | 93.26  |
| Q9NYV4-3               | CDK12_HUMAN Isoform 3 of Cyclin-dependent kinase 12 OS=Homo sapiens GN=CDK12                                            |           | 69.42  |
| Q9NYV4;Q9NYV4-2;Q9NYV4 | CDK12_HUMAN Cyclin-dependent kinase 12 OS=Homo sapiens GN=CDK12 PE=1 SV=2;>sp Q9NYV4-2 CDK12_HUMAN Isoform 2 of C       | 1.62E-05  |        |
| Q9NYV6                 | RRN3_HUMAN RNA polymerase I-specific transcription initiation factor RRN3 OS=Homo sapiens GN=RRN3 PE=1 SV=1             |           |        |
| Q9NYY8                 | FAKD2_HUMAN FAST kinase domain-containing protein 2 OS=Homo sapiens GN=FASTKD2 PE=1 SV=1                                |           |        |
| Q9NYY8-2               | FAKD2_HUMAN Isoform 2 of FAST kinase domain-containing protein 2 OS=Homo sapiens GN=FASTKD2                             |           |        |
| Q9NZ01                 | TECR_HUMAN Trans-2,3-enoyl-CoA reductase OS=Homo sapiens GN=TECR PE=1 SV=1                                              |           | 291.61 |
| Q9NZ01-2               | TECR_HUMAN Isoform 2 of Trans-2,3-enoyl-CoA reductase OS=Homo sapiens GN=TECR                                           |           | 63.8   |
| Q9NZ01;Q9NZ01-2        | TECR_HUMAN Trans-2,3-enoyl-CoA reductase OS=Homo sapiens GN=TECR PE=1 SV=1;>sp Q9NZ01-2 TECR_HUMAN Isoform 2 of Tr      | 1.34E-08  |        |
| Q9NZ08                 | ERAP1_HUMAN Endoplasmic reticulum aminopeptidase 1 OS=Homo sapiens GN=ERAP1 PE=1 SV=3                                   |           | 200.48 |
| Q9NZ08-2               | ERAP1_HUMAN Isoform 2 of Endoplasmic reticulum aminopeptidase 1 OS=Homo sapiens GN=ERAP1                                |           | 200.48 |
| Q9NZ08-2;Q9NZ08        | 2 ERAP1_HUMAN Isoform 2 of Endoplasmic reticulum aminopeptidase 1 OS=Homo sapiens GN=ERAP1;>sp Q9NZ08 ERAP1_HUMAN E     | 4.66E-185 |        |
| Q9NZ09                 | UBAP1_HUMAN Ubiquitin-associated protein 1 OS=Homo sapiens GN=UBAP1 PE=1 SV=1                                           |           |        |
| Q9NZ09-2               | UBAP1_HUMAN Isoform 2 of Ubiquitin-associated protein 1 OS=Homo sapiens GN=UBAP1                                        |           |        |
| Q9NZ32                 | ARP10_HUMAN Actin-related protein 10 OS=Homo sapiens GN=ACTR10 PE=1 SV=1                                                | 1.50E-12  |        |
| Q9NZ43                 | USE1_HUMAN Vesicle transport protein USE1 OS=Homo sapiens GN=USE1 PE=1 SV=2                                             |           | 38.98  |
| Q9NZ43-2               | USE1_HUMAN Isoform 2 of Vesicle transport protein USE1 OS=Homo sapiens GN=USE1                                          |           | 11.38  |

|                       |                                                                                                                          |            |         |
|-----------------------|--------------------------------------------------------------------------------------------------------------------------|------------|---------|
| Q9NZ43-3              | USE1_HUMAN Isoform 3 of Vesicle transport protein USE1 OS=Homo sapiens GN=USE1                                           |            | 11.38   |
| Q9NZ45                | CISD1_HUMAN CDGSH iron-sulfur domain-containing protein 1 OS=Homo sapiens GN=CISD1 PE=1 SV=1                             |            | 137.51  |
| Q9NZ52                | GGA3_HUMAN ADP-ribosylation factor-binding protein GGA3 OS=Homo sapiens GN=GGA3 PE=1 SV=1                                |            | 36.71   |
| Q9NZ52-2              | GGA3_HUMAN Isoform Short of ADP-ribosylation factor-binding protein GGA3 OS=Homo sapiens GN=GGA3                         |            | 2.99    |
| Q9NZ53                | PDXL2_HUMAN Podocalyxin-like protein 2 OS=Homo sapiens GN=PODXL2 PE=1 SV=1                                               |            | 21.89   |
| Q9NZ53-2              | PDXL2_HUMAN Isoform 2 of Podocalyxin-like protein 2 OS=Homo sapiens GN=PODXL2                                            |            | 21.89   |
| Q9NZ63                | CI078_HUMAN Uncharacterized protein C9orf78 OS=Homo sapiens GN=C9orf78 PE=1 SV=1                                         |            |         |
| Q9NZ71                | RTEL1_HUMAN Regulator of telomere elongation helicase 1 OS=Homo sapiens GN=RTEL1 PE=1 SV=2                               |            | 55.65   |
| Q9NZ71-2              | RTEL1_HUMAN Isoform 1 of Regulator of telomere elongation helicase 1 OS=Homo sapiens GN=RTEL1                            |            | 55.65   |
| Q9NZ71-4              | RTEL1_HUMAN Isoform 4 of Regulator of telomere elongation helicase 1 OS=Homo sapiens GN=RTEL1                            |            | 42.77   |
| Q9NZ71-5              | RTEL1_HUMAN Isoform 5 of Regulator of telomere elongation helicase 1 OS=Homo sapiens GN=RTEL1                            |            | 45.17   |
| Q9NZ71-6              | RTEL1_HUMAN Isoform 6 of Regulator of telomere elongation helicase 1 OS=Homo sapiens GN=RTEL1                            |            | 55.65   |
| Q9NZ71-7              | RTEL1_HUMAN Isoform 7 of Regulator of telomere elongation helicase 1 OS=Homo sapiens GN=RTEL1                            |            | 55.65   |
| Q9NZ71-8              | RTEL1_HUMAN Isoform 8 of Regulator of telomere elongation helicase 1 OS=Homo sapiens GN=RTEL1                            |            | 42.77   |
| Q9NZ71-9              | RTEL1_HUMAN Isoform 9 of Regulator of telomere elongation helicase 1 OS=Homo sapiens GN=RTEL1                            |            | 48.68   |
| Q9NZA1                | CLIC5_HUMAN Chloride intracellular channel protein 5 OS=Homo sapiens GN=CLIC5 PE=1 SV=3                                  |            | 57.09   |
| Q9NZA1-2              | CLIC5_HUMAN Isoform 1 of Chloride intracellular channel protein 5 OS=Homo sapiens GN=CLIC5                               |            | 57.09   |
| Q9NZB2                | F120A_HUMAN Constitutive coactivator of PPAR-gamma-like protein 1 OS=Homo sapiens GN=FAM120A PE=1 SV=2                   |            | 206.13  |
| Q9NZB2-2              | F120A_HUMAN Isoform B of Constitutive coactivator of PPAR-gamma-like protein 1 OS=Homo sapiens GN=FAM120A                |            | 64.59   |
| Q9NZB2-4              | F120A_HUMAN Isoform D of Constitutive coactivator of PPAR-gamma-like protein 1 OS=Homo sapiens GN=FAM120A                |            | 182.14  |
| Q9NZB2-5              | F120A_HUMAN Isoform E of Constitutive coactivator of PPAR-gamma-like protein 1 OS=Homo sapiens GN=FAM120A                |            | 64.59   |
| Q9NZB2-6              | F120A_HUMAN Isoform F of Constitutive coactivator of PPAR-gamma-like protein 1 OS=Homo sapiens GN=FAM120A                |            | 206.13  |
| Q9NZB2-6;Q9NZB2;Q9NZ  | 6 F120A_HUMAN Isoform F of Constitutive coactivator of PPAR-gamma-like protein 1 OS=Homo sapiens GN=FAM120A;>sp Q9NZB2 F | 1.01E-18   |         |
| Q9NZD2                | GLTP_HUMAN Glycolipid transfer protein OS=Homo sapiens GN=GLTP PE=1 SV=3                                                 | 1.51E-41   |         |
| Q9NZF1                | PLAC8_HUMAN Placenta-specific gene 8 protein OS=Homo sapiens GN=PLAC8 PE=2 SV=1                                          | 3.13E-09   |         |
| Q9NZI8                | IF2B1_HUMAN Insulin-like growth factor 2 mRNA-binding protein 1 OS=Homo sapiens GN=IGF2BP1 PE=1 SV=2                     |            | 30.71   |
| Q9NZJ4;Q9NZJ4-2       | SACS_HUMAN Sacsin OS=Homo sapiens GN=SACS PE=1 SV=2;>sp Q9NZJ4-2 SACS_HUMAN Isoform 2 of Sacsin OS=Homo sapiens (        | 8.46E-12   |         |
| Q9NZJ7                | MTCH1_HUMAN Mitochondrial carrier homolog 1 OS=Homo sapiens GN=MTCH1 PE=1 SV=1                                           |            |         |
| Q9NZJ7-2              | MTCH1_HUMAN Isoform 2 of Mitochondrial carrier homolog 1 OS=Homo sapiens GN=MTCH1                                        |            |         |
| Q9NZJ7-3              | MTCH1_HUMAN Isoform 3 of Mitochondrial carrier homolog 1 OS=Homo sapiens GN=MTCH1                                        |            |         |
| Q9NZJ9;B2RE29;Q9NZJ9- | NUDT4_HUMAN Diphosphoinositol polyphosphate phosphohydrolase 2 OS=Homo sapiens GN=NUDT4 PE=1 SV=2;>tr B2RE29 B2RE29      | 2.01E-07   |         |
| Q9NZL4                | HPBP1_HUMAN Hsp70-binding protein 1 OS=Homo sapiens GN=HSPBP1 PE=1 SV=1                                                  | 2.07E-33   |         |
| Q9NZL9                | MAT2B_HUMAN Methionine adenosyltransferase 2 subunit beta OS=Homo sapiens GN=MAT2B PE=1 SV=1                             |            | 114.44  |
| Q9NZL9-2              | MAT2B_HUMAN Isoform 2 of Methionine adenosyltransferase 2 subunit beta OS=Homo sapiens GN=MAT2B                          |            | 114.44  |
| Q9NZL9-3              | MAT2B_HUMAN Isoform 3 of Methionine adenosyltransferase 2 subunit beta OS=Homo sapiens GN=MAT2B                          |            | 114.44  |
| Q9NZL9-4              | MAT2B_HUMAN Isoform 4 of Methionine adenosyltransferase 2 subunit beta OS=Homo sapiens GN=MAT2B                          |            | 114.44  |
| Q9NZL9-5              | MAT2B_HUMAN Isoform 5 of Methionine adenosyltransferase 2 subunit beta OS=Homo sapiens GN=MAT2B                          |            | 76.35   |
| Q9NZL9;A8K7A4;Q9NZL9- | MAT2B_HUMAN Methionine adenosyltransferase 2 subunit beta OS=Homo sapiens GN=MAT2B PE=1 SV=1;>tr A8K7A4 A8K7A4_HUM/      | 1.88E-12   |         |
| Q9NZM1                | MYOF_HUMAN Myoferlin OS=Homo sapiens GN=MYOF PE=1 SV=1                                                                   |            | 2947.29 |
| Q9NZM1-2              | MYOF_HUMAN Isoform 2 of Myoferlin OS=Homo sapiens GN=MYOF                                                                |            | 2700    |
| Q9NZM1-3              | MYOF_HUMAN Isoform 3 of Myoferlin OS=Homo sapiens GN=MYOF                                                                |            | 2784.81 |
| Q9NZM1-4              | MYOF_HUMAN Isoform 4 of Myoferlin OS=Homo sapiens GN=MYOF                                                                |            | 273.46  |
| Q9NZM1-5              | MYOF_HUMAN Isoform 5 of Myoferlin OS=Homo sapiens GN=MYOF                                                                |            | 2090.95 |
| Q9NZM1-6              | MYOF_HUMAN Isoform 6 of Myoferlin OS=Homo sapiens GN=MYOF                                                                |            | 2947.29 |
| Q9NZM1-7              | MYOF_HUMAN Isoform 7 of Myoferlin OS=Homo sapiens GN=MYOF                                                                |            | 736.46  |
| Q9NZM1-8              | MYOF_HUMAN Isoform 8 of Myoferlin OS=Homo sapiens GN=MYOF                                                                |            | 625.51  |
| Q9NZM1;Q9NZM1-6;C9JC  | MYOF_HUMAN Myoferlin OS=Homo sapiens GN=MYOF PE=1 SV=1;>sp Q9NZM1-6 MYOF_HUMAN Isoform 6 of Myoferlin OS=Homo sa         | 0          |         |
| Q9NZM5                | GSCR2_HUMAN Glioma tumor suppressor candidate region gene 2 protein OS=Homo sapiens GN=GLTSCR2 PE=1 SV=2                 |            |         |
| Q9NZN1                | IRPL1_HUMAN Interleukin-1 receptor accessory protein-like 1 OS=Homo sapiens GN=IL1RAPL1 PE=1 SV=2                        |            | 30.93   |
| Q9NZN3                | EHD3_HUMAN EH domain-containing protein 3 OS=Homo sapiens GN=EHD3 PE=1 SV=2                                              |            | 376.12  |
| Q9NZN4                | EHD2_HUMAN EH domain-containing protein 2 OS=Homo sapiens GN=EHD2 PE=1 SV=2                                              |            | 233.32  |
| Q9NZN8                | CNOT2_HUMAN CCR4-NOT transcription complex subunit 2 OS=Homo sapiens GN=CNOT2 PE=1 SV=1                                  |            |         |
| Q9NZN8-4              | CNOT2_HUMAN Isoform 4 of CCR4-NOT transcription complex subunit 2 OS=Homo sapiens GN=CNOT2                               |            |         |
| Q9NZN8-5              | CNOT2_HUMAN Isoform 5 of CCR4-NOT transcription complex subunit 2 OS=Homo sapiens GN=CNOT2                               |            |         |
| Q9NZQ3;Q9NZQ3-2;Q9NZ  | SPN90_HUMAN NCK-interacting protein with SH3 domain OS=Homo sapiens GN=NCKIPSD PE=1 SV=1;>sp Q9NZQ3-2 SPN90_HUMAI        | 2.81E-09   |         |
| Q9NZQ7;Q9NZQ7-3;Q9NZ  | PD1L1_HUMAN Programmed cell death 1 ligand 1 OS=Homo sapiens GN=CD274 PE=1 SV=1;>sp Q9NZQ7-3 PD1L1_HUMAN Isoform         | 0.00024388 |         |
| Q9NZT1                | CALL5_HUMAN Calmodulin-like protein 5 OS=Homo sapiens GN=CALL5 PE=1 SV=2                                                 | 1.90E-23   |         |
| Q9NZT2;Q05BV5;Q9NZT2  | OGFR_HUMAN Opioid growth factor receptor OS=Homo sapiens GN=OGFR PE=1 SV=3;>tr Q05BV5 Q05BV5_HUMAN OGFR protein OS       | 7.22E-43   |         |
| Q9NZU5                | LMCD1_HUMAN LIM and cysteine-rich domains protein 1 OS=Homo sapiens GN=LMCD1 PE=1 SV=1                                   | 1.13E-30   |         |
| Q9NZV7                | ZIM2_HUMAN Zinc finger imprinted 2 OS=Homo sapiens GN=ZIM2 PE=2 SV=1                                                     |            |         |
| Q9NZW5                | MPP6_HUMAN MAGUK p55 subfamily member 6 OS=Homo sapiens GN=MPP6 PE=1 SV=2                                                | 2.50E-14   |         |

|                          |                                                                                                                          |           |        |
|--------------------------|--------------------------------------------------------------------------------------------------------------------------|-----------|--------|
| Q9NZZ3                   | CHMP5_HUMAN Charged multivesicular body protein 5 OS=Homo sapiens GN=CHMP5 PE=1 SV=1                                     | 2.55E-20  |        |
| Q9P000;Q9P000-2          | COMD9_HUMAN COMM domain-containing protein 9 OS=Homo sapiens GN=COMMD9 PE=1 SV=2;>sp Q9P000-2 COMD9_HUMAN Isof           | 7.73E-25  |        |
| Q9P003                   | CNIH4_HUMAN Protein cornichon homolog 4 OS=Homo sapiens GN=CNIH4 PE=1 SV=1                                               |           | 36.53  |
| Q9P013                   | CWC15_HUMAN Protein CWC15 homolog OS=Homo sapiens GN=CWC15 PE=1 SV=2                                                     |           | 50.53  |
| Q9P015                   | RM15_HUMAN 39S ribosomal protein L15, mitochondrial OS=Homo sapiens GN=MRPL15 PE=1 SV=1                                  |           | 85.2   |
| Q9P016                   | THYN1_HUMAN Thymocyte nuclear protein 1 OS=Homo sapiens GN=THYN1 PE=1 SV=1                                               |           | 283.07 |
| Q9P016-2                 | THYN1_HUMAN Isoform 2 of Thymocyte nuclear protein 1 OS=Homo sapiens GN=THYN1                                            |           | 156.36 |
| Q9P016;Q9P016-2          | THYN1_HUMAN Thymocyte nuclear protein 1 OS=Homo sapiens GN=THYN1 PE=1 SV=1;>sp Q9P016-2 THYN1_HUMAN Isoform 2 of 1       | 6.91E-15  |        |
| Q9P031                   | TAP26_HUMAN Thyroid transcription factor 1-associated protein 26 OS=Homo sapiens GN=CCDC59 PE=1 SV=2                     |           |        |
| Q9P032                   | NDUF4_HUMAN NADH dehydrogenase [ubiquinone] 1 alpha subcomplex assembly factor 4 OS=Homo sapiens GN=NDUF4F4 PE=1 SV=1    |           | 53.08  |
| Q9P035                   | HACD3_HUMAN 3-hydroxyacyl-CoA dehydratase 3 OS=Homo sapiens GN=PTPLAD1 PE=1 SV=2                                         |           | 157.6  |
| Q9P0I2                   | TM111_HUMAN Transmembrane protein 111 OS=Homo sapiens GN=TMEM111 PE=1 SV=3                                               |           | 136.84 |
| Q9P0I2-2                 | TM111_HUMAN Isoform 2 of Transmembrane protein 111 OS=Homo sapiens GN=TMEM111                                            |           | 136.84 |
| Q9P0I2;Q9P0I2-2          | TM111_HUMAN Transmembrane protein 111 OS=Homo sapiens GN=TMEM111 PE=1 SV=3;>sp Q9P0I2-2 TM111_HUMAN Isoform 2 o          | 1.88E-06  |        |
| Q9P0J0                   | NDUAD_HUMAN NADH dehydrogenase [ubiquinone] 1 alpha subcomplex subunit 13 OS=Homo sapiens GN=NDUFA13 PE=1 SV=3           |           | 127.13 |
| Q9P0J1                   | PDP1_HUMAN [Pyruvate dehydrogenase [acetyl-transferring]]-phosphatase 1, mitochondrial OS=Homo sapiens GN=PDP1 PE=1 SV=3 |           | 71.8   |
| Q9P0J7                   | KCMF1_HUMAN E3 ubiquitin-protein ligase KCMF1 OS=Homo sapiens GN=KCMF1 PE=1 SV=2                                         | 4.73E-10  |        |
| Q9P0K7                   | RAI14_HUMAN Ankycorbin OS=Homo sapiens GN=RAI14 PE=1 SV=2                                                                |           | 25.97  |
| Q9P0K7-2                 | RAI14_HUMAN Isoform 2 of Ankycorbin OS=Homo sapiens GN=RAI14                                                             |           | 31.72  |
| Q9P0K7-2;Q9P0K7;Q9P0K7-3 | RAI14_HUMAN Isoform 2 of Ankycorbin OS=Homo sapiens GN=RAI14;>sp Q9P0K7 RAI14_HUMAN Ankycorbin OS=Homo sapiens G         | 9.01E-64  |        |
| Q9P0K7-3                 | RAI14_HUMAN Isoform 3 of Ankycorbin OS=Homo sapiens GN=RAI14                                                             |           | 25.97  |
| Q9P0K8                   | FOXJ2_HUMAN Forkhead box protein J2 OS=Homo sapiens GN=FOXJ2 PE=1 SV=1                                                   |           |        |
| Q9P0K8-2                 | FOXJ2_HUMAN Isoform FOXJ2.S of Forkhead box protein J2 OS=Homo sapiens GN=FOXJ2                                          |           |        |
| Q9P0L0                   | VAPA_HUMAN Vesicle-associated membrane protein-associated protein A OS=Homo sapiens GN=VAPA PE=1 SV=3                    |           | 600.64 |
| Q9P0L0-2                 | VAPA_HUMAN Isoform 2 of Vesicle-associated membrane protein-associated protein A OS=Homo sapiens GN=VAPA                 |           | 565.24 |
| Q9P0L0-2;D3DUI3;Q9P0L0-2 | VAPA_HUMAN Isoform 2 of Vesicle-associated membrane protein-associated protein A OS=Homo sapiens GN=VAPA;>tr D3DUI3 D3I  | 1.64E-94  |        |
| Q9P0L0;Q9P0L0-2          | VAPA_HUMAN Vesicle-associated membrane protein-associated protein A OS=Homo sapiens GN=VAPA PE=1 SV=3;>sp Q9P0L0-2 VAF   | 3.62E-32  |        |
| Q9P0M6                   | H2AW_HUMAN Core histone macro-H2A.2 OS=Homo sapiens GN=H2AFY2 PE=1 SV=3                                                  |           | 85.09  |
| Q9P0M9                   | RM27_HUMAN 39S ribosomal protein L27, mitochondrial OS=Homo sapiens GN=MRPL27 PE=1 SV=1                                  |           | 145.05 |
| Q9P0N8                   | MARH2_HUMAN E3 ubiquitin-protein ligase MARCH2 OS=Homo sapiens GN=MARCH2 PE=1 SV=1                                       |           |        |
| Q9P0N8-2                 | MARH2_HUMAN Isoform 2 of E3 ubiquitin-protein ligase MARCH2 OS=Homo sapiens GN=MARCH2                                    |           |        |
| Q9P0S3                   | ORML1_HUMAN ORM1-like protein 1 OS=Homo sapiens GN=ORMDL1 PE=2 SV=1                                                      |           |        |
| Q9P0S9                   | TM14C_HUMAN Transmembrane protein 14C OS=Homo sapiens GN=TMEM14C PE=1 SV=1                                               |           | 222.67 |
| Q9P0T7                   | TMEM9_HUMAN Transmembrane protein 9 OS=Homo sapiens GN=TMEM9 PE=1 SV=1                                                   |           | 25.6   |
| Q9P0V3                   | SH3B4_HUMAN SH3 domain-binding protein 4 OS=Homo sapiens GN=SH3BP4 PE=1 SV=1                                             |           |        |
| Q9P0V3-2                 | SH3B4_HUMAN Isoform 2 of SH3 domain-binding protein 4 OS=Homo sapiens GN=SH3BP4                                          |           |        |
| Q9P0V9                   | SEP10_HUMAN Septin-10 OS=Homo sapiens GN=SEPT10 PE=1 SV=2                                                                |           | 139.78 |
| Q9P0V9-2                 | SEP10_HUMAN Isoform 2 of Septin-10 OS=Homo sapiens GN=SEPT10                                                             |           | 139.78 |
| Q9P0V9-2;Q9P0V9;Q9P0V9-3 | SEP10_HUMAN Isoform 2 of Septin-10 OS=Homo sapiens GN=SEPT10;>sp Q9P0V9 SEP10_HUMAN Septin-10 OS=Homo sapiens GI         | 2.67E-34  |        |
| Q9P0V9-3                 | SEP10_HUMAN Isoform 3 of Septin-10 OS=Homo sapiens GN=SEPT10                                                             |           | 137.84 |
| Q9P0X4                   | CAC1I_HUMAN Voltage-dependent T-type calcium channel subunit alpha-1I OS=Homo sapiens GN=CACNA1I PE=1 SV=1               |           |        |
| Q9P0X4-2                 | CAC1I_HUMAN Isoform 2 of Voltage-dependent T-type calcium channel subunit alpha-1I OS=Homo sapiens GN=CACNA1I            |           |        |
| Q9P0X4-3                 | CAC1I_HUMAN Isoform 3 of Voltage-dependent T-type calcium channel subunit alpha-1I OS=Homo sapiens GN=CACNA1I            |           |        |
| Q9P0X4-4                 | CAC1I_HUMAN Isoform 4 of Voltage-dependent T-type calcium channel subunit alpha-1I OS=Homo sapiens GN=CACNA1I            |           |        |
| Q9P107                   | GMIP_HUMAN GEM-interacting protein OS=Homo sapiens GN=GMIP PE=1 SV=2                                                     |           |        |
| Q9P1F3                   | CF115_HUMAN Costars family protein C6orf115 OS=Homo sapiens GN=C6orf115 PE=1 SV=1                                        | 2.02E-115 |        |
| Q9P1U1                   | ARP3B_HUMAN Actin-related protein 3B OS=Homo sapiens GN=ACTR3B PE=1 SV=1                                                 |           | 80.64  |
| Q9P1U1-2                 | ARP3B_HUMAN Isoform 2 of Actin-related protein 3B OS=Homo sapiens GN=ACTR3B                                              |           | 79.4   |
| Q9P1U1-3                 | ARP3B_HUMAN Isoform 3 of Actin-related protein 3B OS=Homo sapiens GN=ACTR3B                                              |           | 80.64  |
| Q9P219                   | DAPLE_HUMAN Protein Daple OS=Homo sapiens GN=CCDC88C PE=1 SV=3                                                           |           |        |
| Q9P225;Q9P225-2          | DYH2_HUMAN Dynein heavy chain 2, axonemal OS=Homo sapiens GN=DNAH2 PE=1 SV=3;>sp Q9P225-2 DYH2_HUMAN Isoform 2 o         | 3.01E-10  |        |
| Q9P227                   | RHG23_HUMAN Rho GTPase-activating protein 23 OS=Homo sapiens GN=ARHGAP23 PE=1 SV=2                                       |           | 33.58  |
| Q9P227-2                 | RHG23_HUMAN Isoform 2 of Rho GTPase-activating protein 23 OS=Homo sapiens GN=ARHGAP23                                    |           | 1.68   |
| Q9P244                   | LRFN1_HUMAN Leucine-rich repeat and fibronectin type III domain-containing protein 1 OS=Homo sapiens GN=LRFN1 PE=1 SV=2  |           |        |
| Q9P246                   | STIM2_HUMAN Stromal interaction molecule 2 OS=Homo sapiens GN=STIM2 PE=1 SV=2                                            |           |        |
| Q9P258                   | RCC2_HUMAN Protein RCC2 OS=Homo sapiens GN=RCC2 PE=1 SV=2                                                                |           | 287.33 |
| Q9P260                   | K1468_HUMAN LisH domain and HEAT repeat-containing protein KIAA1468 OS=Homo sapiens GN=KIAA1468 PE=1 SV=2                |           |        |
| Q9P260-2;Q9P260          | 2 K1468_HUMAN Isoform 2 of LisH domain and HEAT repeat-containing protein KIAA1468 OS=Homo sapiens GN=KIAA1468;>sp Q9P   | 2.50E-19  |        |
| Q9P265                   | DIP2B_HUMAN Disco-interacting protein 2 homolog B OS=Homo sapiens GN=DIP2B PE=1 SV=3                                     | 2.45E-10  |        |
| Q9P270                   | SLAI2_HUMAN SLAIN motif-containing protein 2 OS=Homo sapiens GN=SLAIN2 PE=1 SV=2                                         |           | 26.9   |
| Q9P281                   | BAHC1_HUMAN BAH and coiled-coil domain-containing protein 1 OS=Homo sapiens GN=BAHCC1 PE=1 SV=3                          |           |        |

|                       |                                                                                                                            |           |         |
|-----------------------|----------------------------------------------------------------------------------------------------------------------------|-----------|---------|
| Q9P287                | BCCIP_HUMAN BRCA2 and CDKN1A-interacting protein OS=Homo sapiens GN=BCCIP PE=1 SV=1                                        |           | 65.65   |
| Q9P287-2              | BCCIP_HUMAN Isoform 2 of BRCA2 and CDKN1A-interacting protein OS=Homo sapiens GN=BCCIP                                     |           | 65.65   |
| Q9P287-2;Q9P287;B3KP4 | 2 BCCIP_HUMAN Isoform 2 of BRCA2 and CDKN1A-interacting protein OS=Homo sapiens GN=BCCIP;>sp Q9P287 BCCIP_HUMAN BRC        | 5.52E-140 |         |
| Q9P287-3              | BCCIP_HUMAN Isoform 3 of BRCA2 and CDKN1A-interacting protein OS=Homo sapiens GN=BCCIP                                     |           | 65.65   |
| Q9P287;Q9P287-2;Q9P28 | BCCIP_HUMAN BRCA2 and CDKN1A-interacting protein OS=Homo sapiens GN=BCCIP PE=1 SV=1;>sp Q9P287-2 BCCIP_HUMAN Isofc         | 2.96E-191 |         |
| Q9P289                | MST4_HUMAN Serine/threonine-protein kinase MST4 OS=Homo sapiens GN=MST4 PE=1 SV=2                                          |           | 105.17  |
| Q9P289-2              | MST4_HUMAN Isoform 2 of Serine/threonine-protein kinase MST4 OS=Homo sapiens GN=MST4                                       |           | 98.17   |
| Q9P289-3              | MST4_HUMAN Isoform 3 of Serine/threonine-protein kinase MST4 OS=Homo sapiens GN=MST4                                       |           | 48.85   |
| Q9P289;Q9P289-2;Q9P28 | MST4_HUMAN Serine/threonine-protein kinase MST4 OS=Homo sapiens GN=MST4 PE=1 SV=2;>sp Q9P289-2 MST4_HUMAN Isoform          | 4.26E-46  |         |
| Q9P2A4                | ABI3_HUMAN ABI gene family member 3 OS=Homo sapiens GN=ABI3 PE=1 SV=2                                                      |           | 21.63   |
| Q9P2A4-2              | ABI3_HUMAN Isoform 2 of ABI gene family member 3 OS=Homo sapiens GN=ABI3                                                   |           | 21.61   |
| Q9P2B2                | FPRP_HUMAN Prostaglandin F2 receptor negative regulator OS=Homo sapiens GN=PTGFRN PE=1 SV=2                                | 7.65E-17  |         |
| Q9P2B4                | CT2NL_HUMAN CTTNBP2 N-terminal-like protein OS=Homo sapiens GN=CTTNBP2NL PE=1 SV=2                                         |           |         |
| Q9P2D1                | CHD7_HUMAN Chromodomain-helicase-DNA-binding protein 7 OS=Homo sapiens GN=CHD7 PE=1 SV=3                                   |           | 90.96   |
| Q9P2D1-2              | CHD7_HUMAN Isoform 2 of Chromodomain-helicase-DNA-binding protein 7 OS=Homo sapiens GN=CHD7                                |           | 8.06    |
| Q9P2D3                | HTR5B_HUMAN HEAT repeat-containing protein 5B OS=Homo sapiens GN=HEATR5B PE=1 SV=2                                         |           | 24.52   |
| Q9P2D3-2              | HTR5B_HUMAN Isoform 2 of HEAT repeat-containing protein 5B OS=Homo sapiens GN=HEATR5B                                      |           | 0.79    |
| Q9P2D3-3              | HTR5B_HUMAN Isoform 3 of HEAT repeat-containing protein 5B OS=Homo sapiens GN=HEATR5B                                      |           | 24.52   |
| Q9P2D8                | UNC79_HUMAN Protein unc-79 homolog OS=Homo sapiens GN=KIAA1409 PE=2 SV=3                                                   |           | 29.54   |
| Q9P2D8-2              | UNC79_HUMAN Isoform 2 of Protein unc-79 homolog OS=Homo sapiens GN=KIAA1409                                                |           | 29.54   |
| Q9P2D8-3              | UNC79_HUMAN Isoform 3 of Protein unc-79 homolog OS=Homo sapiens GN=KIAA1409                                                |           | 29.54   |
| Q9P2E3                | ZNFX1_HUMAN NFX1-type zinc finger-containing protein 1 OS=Homo sapiens GN=ZNFX1 PE=1 SV=2                                  |           |         |
| Q9P2E9                | RRBP1_HUMAN Ribosome-binding protein 1 OS=Homo sapiens GN=RRBP1 PE=1 SV=4                                                  |           | 2137.16 |
| Q9P2E9-2              | RRBP1_HUMAN Isoform 1 of Ribosome-binding protein 1 OS=Homo sapiens GN=RRBP1                                               |           | 2110.08 |
| Q9P2E9-3              | RRBP1_HUMAN Isoform 2 of Ribosome-binding protein 1 OS=Homo sapiens GN=RRBP1                                               |           | 2027.22 |
| Q9P2E9;Q9P2E9-2;Q9P2E | RRBP1_HUMAN Ribosome-binding protein 1 OS=Homo sapiens GN=RRBP1 PE=1 SV=4;>sp Q9P2E9-2 RRBP1_HUMAN Isoform 1 of Ri         | 0         |         |
| Q9P2H0                | K1377_HUMAN Uncharacterized protein KIAA1377 OS=Homo sapiens GN=KIAA1377 PE=1 SV=3                                         |           |         |
| Q9P2H3                | IFT80_HUMAN Intraflagellar transport protein 80 homolog OS=Homo sapiens GN=IFT80 PE=1 SV=3                                 |           |         |
| Q9P2H5                | UBP35_HUMAN Ubiquitin carboxyl-terminal hydrolase 35 OS=Homo sapiens GN=USP35 PE=1 SV=3                                    |           |         |
| Q9P2H5-2              | UBP35_HUMAN Isoform 2 of Ubiquitin carboxyl-terminal hydrolase 35 OS=Homo sapiens GN=USP35                                 |           |         |
| Q9P2I0                | CPSF2_HUMAN Cleavage and polyadenylation specificity factor subunit 2 OS=Homo sapiens GN=CPSF2 PE=1 SV=2                   |           | 72.14   |
| Q9P2J5                | SYLC_HUMAN Leucyl-tRNA synthetase, cytoplasmic OS=Homo sapiens GN=LARS PE=1 SV=2                                           |           | 805.75  |
| Q9P2K1                | C2D2A_HUMAN Coiled-coil and C2 domain-containing protein 2A OS=Homo sapiens GN=CC2D2A PE=1 SV=3                            |           |         |
| Q9P2K1-2              | C2D2A_HUMAN Isoform 2 of Coiled-coil and C2 domain-containing protein 2A OS=Homo sapiens GN=CC2D2A                         |           |         |
| Q9P2K1;Q9P2K1-2       | C2D2A_HUMAN Coiled-coil and C2 domain-containing protein 2A OS=Homo sapiens GN=CC2D2A PE=1 SV=3;>sp Q9P2K1-2 C2D2A_I       | 9.88E-11  |         |
| Q9P2K3                | RCOR3_HUMAN REST corepressor 3 OS=Homo sapiens GN=RCOR3 PE=1 SV=2                                                          |           | 27.13   |
| Q9P2K3-2              | RCOR3_HUMAN Isoform 2 of REST corepressor 3 OS=Homo sapiens GN=RCOR3                                                       |           | 24.43   |
| Q9P2K3-3              | RCOR3_HUMAN Isoform 3 of REST corepressor 3 OS=Homo sapiens GN=RCOR3                                                       |           | 27.13   |
| Q9P2K3-4              | RCOR3_HUMAN Isoform 4 of REST corepressor 3 OS=Homo sapiens GN=RCOR3                                                       |           | 24.43   |
| Q9P2K5                | MYEF2_HUMAN Myelin expression factor 2 OS=Homo sapiens GN=MYEF2 PE=1 SV=3                                                  |           |         |
| Q9P2K5-2              | MYEF2_HUMAN Isoform 2 of Myelin expression factor 2 OS=Homo sapiens GN=MYEF2                                               |           |         |
| Q9P2K5-3              | MYEF2_HUMAN Isoform 3 of Myelin expression factor 2 OS=Homo sapiens GN=MYEF2                                               |           |         |
| Q9P2K5-4              | MYEF2_HUMAN Isoform 4 of Myelin expression factor 2 OS=Homo sapiens GN=MYEF2                                               |           |         |
| Q9P2K8;Q9P2K8-2       | E2AK4_HUMAN Eukaryotic translation initiation factor 2-alpha kinase 4 OS=Homo sapiens GN=EIF2AK4 PE=1 SV=3;>sp Q9P2K8-2 E2 | 1.87E-12  |         |
| Q9P2M7                | CING_HUMAN Cingulin OS=Homo sapiens GN=CGN PE=1 SV=2                                                                       |           |         |
| Q9P2M7-2              | CING_HUMAN Isoform 2 of Cingulin OS=Homo sapiens GN=CGN                                                                    |           |         |
| Q9P2M7;Q9P2M7-2       | CING_HUMAN Cingulin OS=Homo sapiens GN=CGN PE=1 SV=2;>sp Q9P2M7-2 CING_HUMAN Isoform 2 of Cingulin OS=Homo sapien          | 1.75E-14  |         |
| Q9P2N5                | RBM27_HUMAN RNA-binding protein 27 OS=Homo sapiens GN=RBM27 PE=1 SV=2                                                      |           | 26.7    |
| Q9P2P6                | STAR9_HUMAN StAR-related lipid transfer protein 9 OS=Homo sapiens GN=STARD9 PE=2 SV=2                                      | 1.26E-13  |         |
| Q9P2P6-3              | STAR9_HUMAN Isoform 3 of StAR-related lipid transfer protein 9 OS=Homo sapiens GN=STARD9                                   |           |         |
| Q9P2R3                | ANFY1_HUMAN Ankyrin repeat and FYVE domain-containing protein 1 OS=Homo sapiens GN=ANKFY1 PE=1 SV=2                        |           |         |
| Q9P2R3-2              | ANFY1_HUMAN Isoform 2 of Ankyrin repeat and FYVE domain-containing protein 1 OS=Homo sapiens GN=ANKFY1                     |           |         |
| Q9P2R3-2;Q9P2R3;B3KPZ | 2 ANFY1_HUMAN Isoform 2 of Ankyrin repeat and FYVE domain-containing protein 1 OS=Homo sapiens GN=ANKFY1;>sp Q9P2R3 AN     | 9.89E-06  |         |
| Q9P2R3-3              | ANFY1_HUMAN Isoform 3 of Ankyrin repeat and FYVE domain-containing protein 1 OS=Homo sapiens GN=ANKFY1                     |           |         |
| Q9P2R3-4              | ANFY1_HUMAN Isoform 4 of Ankyrin repeat and FYVE domain-containing protein 1 OS=Homo sapiens GN=ANKFY1                     |           |         |
| Q9P2R3-4;Q9P2R3-2;Q9P | 4 ANFY1_HUMAN Isoform 4 of Ankyrin repeat and FYVE domain-containing protein 1 OS=Homo sapiens GN=ANKFY1;>sp Q9P2R3-2 A    | 2.85E-10  |         |
| Q9P2R7                | SUCB1_HUMAN Succinyl-CoA ligase [ADP-forming] subunit beta, mitochondrial OS=Homo sapiens GN=SUCLA2 PE=1 SV=3              |           | 23.98   |
| Q9P2R7-2              | SUCB1_HUMAN Isoform 2 of Succinyl-CoA ligase [ADP-forming] subunit beta, mitochondrial OS=Homo sapiens GN=SUCLA2           |           | 23.98   |
| Q9P2R7;Q9P2R7-2       | SUCB1_HUMAN Succinyl-CoA ligase [ADP-forming] subunit beta, mitochondrial OS=Homo sapiens GN=SUCLA2 PE=1 SV=3;>sp Q9P2     | 2.06E-69  |         |
| Q9P2S6                | ANKY1_HUMAN Ankyrin repeat and MYND domain-containing protein 1 OS=Homo sapiens GN=ANKMY1 PE=2 SV=2                        |           |         |
| Q9P2T1                | GMPT2_HUMAN GMP reductase 2 OS=Homo sapiens GN=GMPT2 PE=1 SV=1                                                             |           |         |

|                        |                                                                                                                          |          |        |
|------------------------|--------------------------------------------------------------------------------------------------------------------------|----------|--------|
| Q9P2T1-2               | GMPR2_HUMAN Isoform 2 of GMP reductase 2 OS=Homo sapiens GN=GMPR2                                                        |          |        |
| Q9P2T1-2;Q9P2T1        | 2 GMPR2_HUMAN Isoform 2 of GMP reductase 2 OS=Homo sapiens GN=GMPR2;>sp Q9P2T1 GMPR2_HUMAN GMP reductase 2 OS=H          | 9.90E-14 |        |
| Q9P2W9                 | STX18_HUMAN Syntaxin-18 OS=Homo sapiens GN=STX18 PE=1 SV=1                                                               |          |        |
| Q9P2X0                 | DPM3_HUMAN Dolichol-phosphate mannosyltransferase subunit 3 OS=Homo sapiens GN=DPM3 PE=1 SV=2                            |          | 46.92  |
| Q9P2X0-2               | DPM3_HUMAN Isoform 2 of Dolichol-phosphate mannosyltransferase subunit 3 OS=Homo sapiens GN=DPM3                         |          | 46.92  |
| Q9P2X0-2;Q9P2X0        | 2 DPM3_HUMAN Isoform 2 of Dolichol-phosphate mannosyltransferase subunit 3 OS=Homo sapiens GN=DPM3;>sp Q9P2X0 DPM3_HL    | 6.48E-08 |        |
| Q9P2Y4                 | ZNF219_HUMAN Zinc finger protein 219 OS=Homo sapiens GN=ZNF219 PE=1 SV=2                                                 |          |        |
| Q9TNN7                 | 1C05_HUMAN HLA class I histocompatibility antigen, Cw-5 alpha chain OS=Homo sapiens GN=HLA-C PE=2 SV=1                   |          | 300.74 |
| Q9TQE0                 | 2B19_HUMAN HLA class II histocompatibility antigen, DRB1-9 beta chain OS=Homo sapiens GN=HLA-DRB1 PE=1 SV=1              |          | 29.42  |
| Q9UBB4                 | ATX10_HUMAN Ataxin-10 OS=Homo sapiens GN=ATXN10 PE=1 SV=1                                                                |          |        |
| Q9UBB5                 | MBD2_HUMAN Methyl-CpG-binding domain protein 2 OS=Homo sapiens GN=MBD2 PE=1 SV=1                                         |          |        |
| Q9UBB5-2               | MBD2_HUMAN Isoform 2 of Methyl-CpG-binding domain protein 2 OS=Homo sapiens GN=MBD2                                      |          |        |
| Q9UBB5-3               | MBD2_HUMAN Isoform 3 of Methyl-CpG-binding domain protein 2 OS=Homo sapiens GN=MBD2                                      |          |        |
| Q9UBB6-3;D3DPR9;Q9UBI3 | 3 NCDN_HUMAN Isoform 3 of Neurochondrin OS=Homo sapiens GN=NCDN;>tr D3DPR9 D3DPR9_HUMAN Neurochondrin, isoform CR/       | 2.71E-06 |        |
| Q9UBC2                 | EP15R_HUMAN Epidermal growth factor receptor substrate 15-like 1 OS=Homo sapiens GN=EPS15L1 PE=1 SV=1                    |          |        |
| Q9UBC5                 | MYO1A_HUMAN Myosin-Ia OS=Homo sapiens GN=MYO1A PE=1 SV=1                                                                 |          | 198.78 |
| Q9UBD5                 | ORC3_HUMAN Origin recognition complex subunit 3 OS=Homo sapiens GN=ORC3 PE=1 SV=1                                        |          | 61.04  |
| Q9UBD5-2               | ORC3_HUMAN Isoform 2 of Origin recognition complex subunit 3 OS=Homo sapiens GN=ORC3                                     |          | 61.04  |
| Q9UBD5-2;Q9UBD5        | 2 ORC3_HUMAN Isoform 2 of Origin recognition complex subunit 3 OS=Homo sapiens GN=ORC3;>sp Q9UBD5 ORC3_HUMAN Origin r    | 9.65E-17 |        |
| Q9UBD9                 | CLCF1_HUMAN Cardiotrophin-like cytokine factor 1 OS=Homo sapiens GN=CLCF1 PE=1 SV=1                                      |          | 57.25  |
| Q9UBE0                 | SAE1_HUMAN SUMO-activating enzyme subunit 1 OS=Homo sapiens GN=SAE1 PE=1 SV=1                                            |          | 289.8  |
| Q9UBF2                 | COPG2_HUMAN Coatomer subunit gamma-2 OS=Homo sapiens GN=COPG2 PE=1 SV=1                                                  |          | 59.49  |
| Q9UBG0                 | MRC2_HUMAN C-type mannose receptor 2 OS=Homo sapiens GN=MRC2 PE=1 SV=2                                                   |          |        |
| Q9UBI1                 | COMD3_HUMAN COMM domain-containing protein 3 OS=Homo sapiens GN=COMMD3 PE=1 SV=1                                         |          | 49.31  |
| Q9UBI6                 | GBG12_HUMAN Guanine nucleotide-binding protein G(I)/G(S)/G(O) subunit gamma-12 OS=Homo sapiens GN=GNG12 PE=1 SV=3        |          | 186.98 |
| Q9UBJ2                 | ABCD2_HUMAN ATP-binding cassette sub-family D member 2 OS=Homo sapiens GN=ABCD2 PE=1 SV=1                                |          |        |
| Q9UBK7                 | RBL2A_HUMAN Rab-like protein 2A OS=Homo sapiens GN=RABL2A PE=2 SV=1                                                      |          |        |
| Q9UBK7-3               | RBL2A_HUMAN Isoform 3 of Rab-like protein 2A OS=Homo sapiens GN=RABL2A                                                   |          |        |
| Q9UBK9                 | UXT_HUMAN Protein UXT OS=Homo sapiens GN=UXT PE=1 SV=1                                                                   |          |        |
| Q9UBL3                 | ASH2L_HUMAN Set1/Ash2 histone methyltransferase complex subunit ASH2 OS=Homo sapiens GN=ASH2L PE=1 SV=1                  |          |        |
| Q9UBL3-2               | ASH2L_HUMAN Isoform 2 of Set1/Ash2 histone methyltransferase complex subunit ASH2 OS=Homo sapiens GN=ASH2L               |          |        |
| Q9UBL3-3               | ASH2L_HUMAN Isoform 3 of Set1/Ash2 histone methyltransferase complex subunit ASH2 OS=Homo sapiens GN=ASH2L               |          |        |
| Q9UBL3;Q9UBL3-3;Q9UBL6 | ASH2L_HUMAN Set1/Ash2 histone methyltransferase complex subunit ASH2 OS=Homo sapiens GN=ASH2L PE=1 SV=1;>sp Q9UBL3-      | 9.81E-58 |        |
| Q9UBL6                 | CPNE7_HUMAN Copine-7 OS=Homo sapiens GN=CPNE7 PE=2 SV=1                                                                  |          |        |
| Q9UBL6-2               | CPNE7_HUMAN Isoform 2 of Copine-7 OS=Homo sapiens GN=CPNE7                                                               |          |        |
| Q9UBM7                 | DHCR7_HUMAN 7-dehydrocholesterol reductase OS=Homo sapiens GN=DHCR7 PE=1 SV=1                                            |          | 262.55 |
| Q9UBM8                 | MGT4C_HUMAN Alpha-1,3-mannosyl-glycoprotein 4-beta-N-acetylglucosaminyltransferase C OS=Homo sapiens GN=MGAT4C PE=2 SV=2 |          |        |
| Q9UBN7                 | HDAC6_HUMAN Histone deacetylase 6 OS=Homo sapiens GN=HDAC6 PE=1 SV=2                                                     |          |        |
| Q9UBP6                 | TRMB_HUMAN tRNA (guanine-N(7)-)-methyltransferase OS=Homo sapiens GN=METTLL1 PE=1 SV=1                                   |          | 52.7   |
| Q9UBQ0                 | VPS29_HUMAN Vacuolar protein sorting-associated protein 29 OS=Homo sapiens GN=VPS29 PE=1 SV=1                            |          | 346.99 |
| Q9UBQ0-2               | VPS29_HUMAN Isoform 2 of Vacuolar protein sorting-associated protein 29 OS=Homo sapiens GN=VPS29                         |          | 346.99 |
| Q9UBQ0-2;Q9UBQ0        | 2 VPS29_HUMAN Isoform 2 of Vacuolar protein sorting-associated protein 29 OS=Homo sapiens GN=VPS29;>sp Q9UBQ0 VPS29_HUM  | 5.35E-14 |        |
| Q9UBQ5                 | EIF3K_HUMAN Eukaryotic translation initiation factor 3 subunit K OS=Homo sapiens GN=EIF3K PE=1 SV=1                      |          | 473.34 |
| Q9UBQ7                 | GRHPR_HUMAN Glyoxylate reductase/hydroxypyruvate reductase OS=Homo sapiens GN=GRHPR PE=1 SV=1                            |          | 44.37  |
| Q9UBR2                 | CATZ_HUMAN Cathepsin Z OS=Homo sapiens GN=CTSZ PE=1 SV=1                                                                 |          | 183.77 |
| Q9UBS4                 | DJB11_HUMAN DnaJ homolog subfamily B member 11 OS=Homo sapiens GN=DNAJB11 PE=1 SV=1                                      |          | 124.28 |
| Q9UBT2                 | SAE2_HUMAN SUMO-activating enzyme subunit 2 OS=Homo sapiens GN=UBA2 PE=1 SV=2                                            |          | 161.32 |
| Q9UBT7;Q9UBT7-2;Q9UBI3 | 3 CTNL1_HUMAN Alpha-catulin OS=Homo sapiens GN=CTNNA1 PE=1 SV=2;>sp Q9UBT7-2 CTNL1_HUMAN Isoform 2 of Alpha-catulin      | 3.18E-26 |        |
| Q9UBU8                 | MO4L1_HUMAN Mortality factor 4-like protein 1 OS=Homo sapiens GN=MORF4L1 PE=1 SV=2                                       |          |        |
| Q9UBU8-2               | MO4L1_HUMAN Isoform 2 of Mortality factor 4-like protein 1 OS=Homo sapiens GN=MORF4L1                                    |          |        |
| Q9UBU8;Q9UBU8-2        | MO4L1_HUMAN Mortality factor 4-like protein 1 OS=Homo sapiens GN=MORF4L1 PE=1 SV=2;>sp Q9UBU8-2 MO4L1_HUMAN Isoform      | 1.75E-09 |        |
| Q9UBU9                 | NXF1_HUMAN Nuclear RNA export factor 1 OS=Homo sapiens GN=NXF1 PE=1 SV=1                                                 |          | 89.61  |
| Q9UBU9-2               | NXF1_HUMAN Isoform 2 of Nuclear RNA export factor 1 OS=Homo sapiens GN=NXF1                                              |          | 39.3   |
| Q9UBU9;Q59E96;B4E269   | NXF1_HUMAN Nuclear RNA export factor 1 OS=Homo sapiens GN=NXF1 PE=1 SV=1;>tr Q59E96 Q59E96_HUMAN Nuclear RNA expor       | 8.83E-75 |        |
| Q9UBV2                 | SEL1L_HUMAN Protein sel-1 homolog 1 OS=Homo sapiens GN=SEL1L PE=1 SV=3                                                   |          |        |
| Q9UBV2-2               | SEL1L_HUMAN Isoform 2 of Protein sel-1 homolog 1 OS=Homo sapiens GN=SEL1L                                                |          |        |
| Q9UBV2;Q9UBV2-2        | 2 SEL1L_HUMAN Protein sel-1 homolog 1 OS=Homo sapiens GN=SEL1L PE=1 SV=3;>sp Q9UBV2-2 SEL1L_HUMAN Isoform 2 of Proteir   | 9.90E-19 |        |
| Q9UBV8                 | PEF1_HUMAN Peflin OS=Homo sapiens GN=PEF1 PE=1 SV=1                                                                      |          | 89.81  |
| Q9UBW7                 | ZMYM2_HUMAN Zinc finger MYM-type protein 2 OS=Homo sapiens GN=ZMYM2 PE=1 SV=1                                            |          |        |
| Q9UBW7-2               | ZMYM2_HUMAN Isoform 2 of Zinc finger MYM-type protein 2 OS=Homo sapiens GN=ZMYM2                                         |          |        |
| Q9UBW8                 | CNS7A_HUMAN COP9 signalosome complex subunit 7a OS=Homo sapiens GN=COPS7A PE=1 SV=1                                      |          | 307.36 |



|                       |                                                                                                                         |           |        |
|-----------------------|-------------------------------------------------------------------------------------------------------------------------|-----------|--------|
| Q9UBX3                | DIC_HUMAN Mitochondrial dicarboxylate carrier OS=Homo sapiens GN=SLC25A10 PE=1 SV=2                                     |           | 162.32 |
| Q9UBX3-2              | DIC_HUMAN Isoform 2 of Mitochondrial dicarboxylate carrier OS=Homo sapiens GN=SLC25A10                                  |           | 162.32 |
| Q9UBX3-2;Q9UBX3       | 2 DIC_HUMAN Isoform 2 of Mitochondrial dicarboxylate carrier OS=Homo sapiens GN=SLC25A10;>sp Q9UBX3 DIC_HUMAN Mitochon  | 3.39E-59  |        |
| Q9UBX5                | FBLN5_HUMAN Fibulin-5 OS=Homo sapiens GN=FBLN5 PE=1 SV=1                                                                | 1.10E-22  |        |
| Q9UBX7                | KLK11_HUMAN Kallikrein-11 OS=Homo sapiens GN=KLK11 PE=1 SV=2                                                            |           |        |
| Q9UBX7-1              | KLK11_HUMAN Isoform 1 of Kallikrein-11 OS=Homo sapiens GN=KLK11                                                         |           |        |
| Q9UBY0                | SL9A2_HUMAN Sodium/hydrogen exchanger 2 OS=Homo sapiens GN=SLC9A2 PE=2 SV=1                                             |           |        |
| Q9UDR5                | AASS_HUMAN Alpha-aminoacidic semialdehyde synthase, mitochondrial OS=Homo sapiens GN=AASS PE=1 SV=1                     |           |        |
| Q9UDT6                | CLIP2_HUMAN CAP-Gly domain-containing linker protein 2 OS=Homo sapiens GN=CLIP2 PE=1 SV=1                               |           |        |
| Q9UDT6-2              | CLIP2_HUMAN Isoform 2 of CAP-Gly domain-containing linker protein 2 OS=Homo sapiens GN=CLIP2                            |           |        |
| Q9UDW1                | QCR9_HUMAN Cytochrome b-c1 complex subunit 9 OS=Homo sapiens GN=UQCR10 PE=1 SV=3                                        |           |        |
| Q9UDW1-2              | QCR9_HUMAN Isoform 2 of Cytochrome b-c1 complex subunit 9 OS=Homo sapiens GN=UQCR10                                     |           |        |
| Q9UDY2                | ZO2_HUMAN Tight junction protein ZO-2 OS=Homo sapiens GN=TJP2 PE=1 SV=2                                                 |           | 98.1   |
| Q9UDY2-2              | ZO2_HUMAN Isoform A2 of Tight junction protein ZO-2 OS=Homo sapiens GN=TJP2                                             |           | 90.64  |
| Q9UDY2-3              | ZO2_HUMAN Isoform C1 of Tight junction protein ZO-2 OS=Homo sapiens GN=TJP2                                             |           | 85.01  |
| Q9UDY2-4              | ZO2_HUMAN Isoform C2 of Tight junction protein ZO-2 OS=Homo sapiens GN=TJP2                                             |           | 77.55  |
| Q9UDY2-5              | ZO2_HUMAN Isoform A3 of Tight junction protein ZO-2 OS=Homo sapiens GN=TJP2                                             |           | 60.22  |
| Q9UDY2;A2A3H9;Q9UDY2  | ZO2_HUMAN Tight junction protein ZO-2 OS=Homo sapiens GN=TJP2 PE=1 SV=2;>tr A2A3H9 A2A3H9_HUMAN Tight junction proteir  | 2.13E-108 |        |
| Q9UDY4                | DNJB4_HUMAN DnaJ homolog subfamily B member 4 OS=Homo sapiens GN=DNAJB4 PE=1 SV=1                                       |           | 80.89  |
| Q9UDY8;Q9UDY8-2       | MALT1_HUMAN Mucosa-associated lymphoid tissue lymphoma translocation protein 1 OS=Homo sapiens GN=MALT1 PE=1 SV=1;>sp   | 5.96E-11  |        |
| Q9UEE5                | ST17A_HUMAN Serine/threonine-protein kinase 17A OS=Homo sapiens GN=STK17A PE=1 SV=2                                     |           |        |
| Q9UEE9;Q9UEE9-2       | CFDP1_HUMAN Craniofacial development protein 1 OS=Homo sapiens GN=CFDP1 PE=1 SV=1;>sp Q9UEE9-2 CFDP1_HUMAN Isoform      | 8.28E-21  |        |
| Q9UEG4                | ZNF629_HUMAN Zinc finger protein 629 OS=Homo sapiens GN=ZNF629 PE=2 SV=2                                                |           |        |
| Q9UET6;B3KN91;B7Z4K4  | RRMJ1_HUMAN Putative ribosomal RNA methyltransferase 1 OS=Homo sapiens GN=FTSJ1 PE=1 SV=2;>tr B3KN91 B3KN91_HUMAN c     | 2.53E-23  |        |
| Q9UEU0                | VTI1B_HUMAN Vesicle transport through interaction with t-SNAREs homolog 1B OS=Homo sapiens GN=VTI1B PE=1 SV=3           |           | 59.82  |
| Q9UEU0-2              | VTI1B_HUMAN Isoform Short of Vesicle transport through interaction with t-SNAREs homolog 1B OS=Homo sapiens GN=VTI1B    |           | 59.82  |
| Q9UEU0;Q9UEU0-2       | VTI1B_HUMAN Vesicle transport through interaction with t-SNAREs homolog 1B OS=Homo sapiens GN=VTI1B PE=1 SV=3;>sp Q9UEL | 6.24E-08  |        |
| Q9UEW8                | STK39_HUMAN STE20/SPS1-related proline-alanine-rich protein kinase OS=Homo sapiens GN=STK39 PE=1 SV=3                   | 1.46E-12  |        |
| Q9UEY8;Q9UEY8-2       | ADDG_HUMAN Gamma-adducin OS=Homo sapiens GN=ADD3 PE=1 SV=1;>sp Q9UEY8-2 ADDG_HUMAN Isoform 1 of Gamma-adduci            | 6.06E-08  |        |
| Q9UF33                | EPHA6_HUMAN Ephrin type-A receptor 6 OS=Homo sapiens GN=EPHA6 PE=2 SV=2                                                 |           | 89.59  |
| Q9UF33-2              | EPHA6_HUMAN Isoform 2 of Ephrin type-A receptor 6 OS=Homo sapiens GN=EPHA6                                              |           | 89.59  |
| Q9UF83                | YM012_HUMAN Uncharacterized protein DKFZp434B061 OS=Homo sapiens PE=2 SV=2                                              |           |        |
| Q9UFC0                | LRWD1_HUMAN Leucine-rich repeat and WD repeat-containing protein 1 OS=Homo sapiens GN=LRWD1 PE=1 SV=2                   |           | 54.24  |
| Q9UFD9                | RIM3A_HUMAN RIMS-binding protein 3A OS=Homo sapiens GN=RIMBP3 PE=1 SV=3                                                 |           |        |
| Q9UFF9                | CNOT8_HUMAN CCR4-NOT transcription complex subunit 8 OS=Homo sapiens GN=CNOT8 PE=1 SV=1                                 |           | 14.59  |
| Q9UFN0                | NPS3A_HUMAN Protein NipSnap homolog 3A OS=Homo sapiens GN=NIPSNAP3A PE=1 SV=2                                           |           | 103.51 |
| Q9UFW8                | CGBP1_HUMAN CGG triplet repeat-binding protein 1 OS=Homo sapiens GN=CGGBP1 PE=1 SV=2                                    |           | 75.13  |
| Q9UG56                | PISD_HUMAN Phosphatidylserine decarboxylase proenzyme OS=Homo sapiens GN=PISD PE=2 SV=4                                 |           |        |
| Q9UG56-2              | PISD_HUMAN Isoform 2 of Phosphatidylserine decarboxylase proenzyme OS=Homo sapiens GN=PISD                              |           |        |
| Q9UG63                | ABCF2_HUMAN ATP-binding cassette sub-family F member 2 OS=Homo sapiens GN=ABCF2 PE=1 SV=2                               |           | 137.78 |
| Q9UGI0                | ZRAN1_HUMAN Ubiquitin thioesterase ZRANB1 OS=Homo sapiens GN=ZRANB1 PE=1 SV=2                                           |           | 22.69  |
| Q9UGI8;Q9UGI8-2       | TES_HUMAN Testin OS=Homo sapiens GN=TES PE=1 SV=1;>sp Q9UGI8-2 TES_HUMAN Isoform 2 of Testin OS=Homo sapiens GN=TI      | 2.65E-19  |        |
| Q9UGJ0;Q9UGJ0-3;Q9UGJ | AAKG2_HUMAN 5-AMP-activated protein kinase subunit gamma-2 OS=Homo sapiens GN=PRKAG2 PE=1 SV=1;>sp Q9UGJ0-3 AAKG2       | 6.15E-12  |        |
| Q9UGM3-6;Q9UGM3-7;Q9  | 6 DMBT1_HUMAN Isoform 6 of Deleted in malignant brain tumors 1 protein OS=Homo sapiens GN=DMBT1;>sp Q9UGM3-7 DMBT1_HI   | 1.40E-12  |        |
| Q9UGM6                | SYWM_HUMAN Tryptophanyl-tRNA synthetase, mitochondrial OS=Homo sapiens GN=WARS2 PE=1 SV=1                               |           | 37.97  |
| Q9UGP8                | SEC63_HUMAN Translocation protein SEC63 homolog OS=Homo sapiens GN=SEC63 PE=1 SV=2                                      | 3.82E-14  |        |
| Q9UGT4                | SUSD2_HUMAN Sushi domain-containing protein 2 OS=Homo sapiens GN=SUSD2 PE=1 SV=1                                        | 9.25E-35  |        |
| Q9UGU5                | HMGX4_HUMAN HMG domain-containing protein 4 OS=Homo sapiens GN=HMGXB4 PE=2 SV=2                                         |           |        |
| Q9UGV2;Q9UGV2-2;Q9UG  | NDRG3_HUMAN Protein NDRG3 OS=Homo sapiens GN=NDRG3 PE=1 SV=2;>sp Q9UGV2-2 NDRG3_HUMAN Isoform 2 of Protein NDR          | 1.62E-08  |        |
| Q9UH17                | ABC3B_HUMAN Probable DNA dC->dU-editing enzyme APOBEC-3B OS=Homo sapiens GN=APOBEC3B PE=1 SV=1                          |           |        |
| Q9UH17-2              | ABC3B_HUMAN Isoform 2 of Probable DNA dC->dU-editing enzyme APOBEC-3B OS=Homo sapiens GN=APOBEC3B                       |           | 0.07   |
| Q9UH17;Q96AK3;Q9UH17  | ABC3B_HUMAN Probable DNA dC->dU-editing enzyme APOBEC-3B OS=Homo sapiens GN=APOBEC3B PE=1 SV=1;>sp Q96AK3 ABC3B         | 7.98E-06  |        |
| Q9UH62                | ARMX3_HUMAN Armadillo repeat-containing X-linked protein 3 OS=Homo sapiens GN=ARMCX3 PE=1 SV=1                          |           |        |
| Q9UH65                | SWP70_HUMAN Switch-associated protein 70 OS=Homo sapiens GN=SWAP70 PE=1 SV=1                                            | 1.39E-41  |        |
| Q9UH92                | MLX_HUMAN Max-like protein X OS=Homo sapiens GN=MLX PE=1 SV=2                                                           |           | 34.88  |
| Q9UH92-2              | MLX_HUMAN Isoform Alpha of Max-like protein X OS=Homo sapiens GN=MLX                                                    |           | 6.73   |
| Q9UH92-3              | MLX_HUMAN Isoform Beta of Max-like protein X OS=Homo sapiens GN=MLX                                                     |           | 6.73   |
| Q9UH99                | SUN2_HUMAN SUN domain-containing protein 2 OS=Homo sapiens GN=SUN2 PE=1 SV=3                                            |           | 22.12  |
| Q9UHA3                | RLP24_HUMAN Probable ribosome biogenesis protein RLP24 OS=Homo sapiens GN=RSL24D1 PE=1 SV=1                             |           | 32.04  |
| Q9UHA4                | LTOR3_HUMAN Ragulator complex protein LAMTOR3 OS=Homo sapiens GN=LAMTOR3 PE=1 SV=1                                      |           | 43.16  |
| Q9UHB6                | LIMA1_HUMAN LIM domain and actin-binding protein 1 OS=Homo sapiens GN=LIMA1 PE=1 SV=1                                   |           | 46.68  |

|                       |                                                                                                                             |           |        |
|-----------------------|-----------------------------------------------------------------------------------------------------------------------------|-----------|--------|
| Q9UHB6-2              | LIMA1_HUMAN Isoform Alpha of LIM domain and actin-binding protein 1 OS=Homo sapiens GN=LIMA1                                |           | 46.68  |
| Q9UHB6-3              | LIMA1_HUMAN Isoform 3 of LIM domain and actin-binding protein 1 OS=Homo sapiens GN=LIMA1                                    |           | 46.61  |
| Q9UHB6-4              | LIMA1_HUMAN Isoform 4 of LIM domain and actin-binding protein 1 OS=Homo sapiens GN=LIMA1                                    |           | 46.68  |
| Q9UHB6-4;Q9UHB6;Q9UH4 | LIMA1_HUMAN Isoform 4 of LIM domain and actin-binding protein 1 OS=Homo sapiens GN=LIMA1;>sp Q9UHB6 LIMA1_HUMAN LIM         | 1.57E-91  |        |
| Q9UHB6;Q9UHB6-4;Q9UH  | LIMA1_HUMAN LIM domain and actin-binding protein 1 OS=Homo sapiens GN=LIMA1 PE=1 SV=1;>sp Q9UHB6-4 LIMA1_HUMAN Isof         | 2.86E-226 |        |
| Q9UHB7                | AFF4_HUMAN AF4/FMR2 family member 4 OS=Homo sapiens GN=AFF4 PE=1 SV=1                                                       |           |        |
| Q9UHB7-2              | AFF4_HUMAN Isoform 2 of AF4/FMR2 family member 4 OS=Homo sapiens GN=AFF4                                                    |           |        |
| Q9UHB7-3              | AFF4_HUMAN Isoform 3 of AF4/FMR2 family member 4 OS=Homo sapiens GN=AFF4                                                    |           |        |
| Q9UHB9                | SRP68_HUMAN Signal recognition particle 68 kDa protein OS=Homo sapiens GN=SRP68 PE=1 SV=2                                   |           | 273.55 |
| Q9UHB9-2              | SRP68_HUMAN Isoform 2 of Signal recognition particle 68 kDa protein OS=Homo sapiens GN=SRP68                                |           | 249.06 |
| Q9UHB9;B3KQY7;Q9UHB   | SRP68_HUMAN Signal recognition particle 68 kDa protein OS=Homo sapiens GN=SRP68 PE=1 SV=2;>tr B3KQY7 B3KQY7_HUMAN c[        | 4.32E-110 |        |
| Q9UHC1                | MLH3_HUMAN DNA mismatch repair protein Mlh3 OS=Homo sapiens GN=MLH3 PE=1 SV=3                                               |           |        |
| Q9UHC1-2              | MLH3_HUMAN Isoform 2 of DNA mismatch repair protein Mlh3 OS=Homo sapiens GN=MLH3                                            |           |        |
| Q9UHD1;Q9UHD1-2       | CHRD1_HUMAN Cysteine and histidine-rich domain-containing protein 1 OS=Homo sapiens GN=CHORDC1 PE=1 SV=2;>sp Q9UHD1-2       | 9.91E-68  |        |
| Q9UHD2                | TBK1_HUMAN Serine/threonine-protein kinase TBK1 OS=Homo sapiens GN=TBK1 PE=1 SV=1                                           | 4.47E-07  |        |
| Q9UHD8                | SEPT9_HUMAN Septin-9 OS=Homo sapiens GN=SEPT9 PE=1 SV=2                                                                     |           | 806.8  |
| Q9UHD8-2              | SEPT9_HUMAN Isoform 2 of Septin-9 OS=Homo sapiens GN=SEPT9                                                                  |           | 787.64 |
| Q9UHD8-3              | SEPT9_HUMAN Isoform 3 of Septin-9 OS=Homo sapiens GN=SEPT9                                                                  |           | 569.84 |
| Q9UHD8-4              | SEPT9_HUMAN Isoform 4 of Septin-9 OS=Homo sapiens GN=SEPT9                                                                  |           | 465.75 |
| Q9UHD8-5              | SEPT9_HUMAN Isoform 5 of Septin-9 OS=Homo sapiens GN=SEPT9                                                                  |           | 787.64 |
| Q9UHD8-6              | SEPT9_HUMAN Isoform 6 of Septin-9 OS=Homo sapiens GN=SEPT9                                                                  |           | 366.18 |
| Q9UHD8-7              | SEPT9_HUMAN Isoform 7 of Septin-9 OS=Homo sapiens GN=SEPT9                                                                  |           | 787.64 |
| Q9UHD8-8              | SEPT9_HUMAN Isoform 8 of Septin-9 OS=Homo sapiens GN=SEPT9                                                                  |           | 473.81 |
| Q9UHD8-9              | SEPT9_HUMAN Isoform 9 of Septin-9 OS=Homo sapiens GN=SEPT9                                                                  |           | 465.75 |
| Q9UHD8;Q9UHD8-5;Q9UH  | SEPT9_HUMAN Septin-9 OS=Homo sapiens GN=SEPT9 PE=1 SV=2;>sp Q9UHD8-5 SEPT9_HUMAN Isoform 5 of Septin-9 OS=Homo s            | 8.69E-123 |        |
| Q9UHD9                | UBQL2_HUMAN Ubiquilin-2 OS=Homo sapiens GN=UBQLN2 PE=1 SV=2                                                                 | 2.04E-26  |        |
| Q9UHF7                | TRPS1_HUMAN Zinc finger transcription factor Trps1 OS=Homo sapiens GN=TRPS1 PE=1 SV=2                                       |           | 27.37  |
| Q9UHF7-2              | TRPS1_HUMAN Isoform 2 of Zinc finger transcription factor Trps1 OS=Homo sapiens GN=TRPS1                                    |           | 27.37  |
| Q9UHF7-2;Q9UHF7-3;Q9U | TRPS1_HUMAN Isoform 2 of Zinc finger transcription factor Trps1 OS=Homo sapiens GN=TRPS1;>sp Q9UHF7-3 TRPS1_HUMAN Isof      | 7.01E-06  |        |
| Q9UHF7-3              | TRPS1_HUMAN Isoform 3 of Zinc finger transcription factor Trps1 OS=Homo sapiens GN=TRPS1                                    |           | 27.37  |
| Q9UHG3                | PCYOX_HUMAN Prenylcysteine oxidase 1 OS=Homo sapiens GN=PCYOX1 PE=1 SV=3                                                    |           | 193    |
| Q9UHH9                | IP6K2_HUMAN Inositol hexakisphosphate kinase 2 OS=Homo sapiens GN=IP6K2 PE=2 SV=2                                           |           |        |
| Q9UHI6                | DDX20_HUMAN Probable ATP-dependent RNA helicase DDX20 OS=Homo sapiens GN=DDX20 PE=1 SV=2                                    | 1.14E-11  |        |
| Q9UHI6                | DDX20_HUMAN Probable ATP-dependent RNA helicase DDX20 OS=Homo sapiens GN=DDX20 PE=1 SV=2                                    | 3.39E-17  |        |
| Q9UHL4                | DPP2_HUMAN Dipeptidyl peptidase 2 OS=Homo sapiens GN=DPP7 PE=1 SV=3                                                         | 1.37E-47  |        |
| Q9UHN1                | DPOG2_HUMAN DNA polymerase subunit gamma-2, mitochondrial OS=Homo sapiens GN=POLG2 PE=1 SV=1                                |           | 21.56  |
| Q9UHN6                | TMEM2_HUMAN Transmembrane protein 2 OS=Homo sapiens GN=TMEM2 PE=1 SV=1                                                      |           | 33.19  |
| Q9UHN6-2              | TMEM2_HUMAN Isoform 2 of Transmembrane protein 2 OS=Homo sapiens GN=TMEM2                                                   |           | 33.19  |
| Q9UHQ4                | BAP29_HUMAN B-cell receptor-associated protein 29 OS=Homo sapiens GN=BCAP29 PE=1 SV=2                                       |           | 43.08  |
| Q9UHQ9                | NB5R1_HUMAN NADH-cytochrome b5 reductase 1 OS=Homo sapiens GN=CYB5R1 PE=1 SV=1                                              |           | 311.04 |
| Q9UHR5;Q9UHR5-2       | S30BP_HUMAN SAP30-binding protein OS=Homo sapiens GN=SAP30BP PE=1 SV=1;>sp Q9UHR5-2 S30BP_HUMAN Isoform 2 of SAP3           | 3.98E-10  |        |
| Q9UHV9                | PFD2_HUMAN Prefoldin subunit 2 OS=Homo sapiens GN=PFDN2 PE=1 SV=1                                                           |           | 290.01 |
| Q9UHW5-2;D4YWV1;Q9UI  | 2 GPN3_HUMAN Isoform 2 of GPN-loop GTPase 3 OS=Homo sapiens GN=GPN3;>tr D4YWV1 D4YWV1_HUMAN GPN-loop GTPase 3 OS            | 5.07E-10  |        |
| Q9UHX1                | PUF60_HUMAN Poly(U)-binding-splicing factor PUF60 OS=Homo sapiens GN=PUF60 PE=1 SV=1                                        |           | 439.38 |
| Q9UHX1-2              | PUF60_HUMAN Isoform 2 of Poly(U)-binding-splicing factor PUF60 OS=Homo sapiens GN=PUF60                                     |           | 439.38 |
| Q9UHX1-3              | PUF60_HUMAN Isoform 3 of Poly(U)-binding-splicing factor PUF60 OS=Homo sapiens GN=PUF60                                     |           | 434.38 |
| Q9UHX1-4              | PUF60_HUMAN Isoform 4 of Poly(U)-binding-splicing factor PUF60 OS=Homo sapiens GN=PUF60                                     |           | 434.38 |
| Q9UHX1-5              | PUF60_HUMAN Isoform 5 of Poly(U)-binding-splicing factor PUF60 OS=Homo sapiens GN=PUF60                                     |           | 434.38 |
| Q9UHX1-5;Q9UHX1-6;Q9U | 5 PUF60_HUMAN Isoform 5 of Poly(U)-binding-splicing factor PUF60 OS=Homo sapiens GN=PUF60;>sp Q9UHX1-6 PUF60_HUMAN Isof     | 1.81E-126 |        |
| Q9UHX1-6              | PUF60_HUMAN Isoform 6 of Poly(U)-binding-splicing factor PUF60 OS=Homo sapiens GN=PUF60                                     |           | 434.38 |
| Q9UHX1;Q9UHX1-2;Q9UH  | PUF60_HUMAN Poly(U)-binding-splicing factor PUF60 OS=Homo sapiens GN=PUF60 PE=1 SV=1;>sp Q9UHX1-2 PUF60_HUMAN Isofor        | 8.37E-197 |        |
| Q9UHY1                | NRBP_HUMAN Nuclear receptor-binding protein OS=Homo sapiens GN=NRBP1 PE=1 SV=1                                              | 1.18E-08  |        |
| Q9UHY7                | ENOPH_HUMAN Enolase-phosphatase E1 OS=Homo sapiens GN=ENOPH1 PE=1 SV=1                                                      | 9.99E-22  |        |
| Q9UI08-2;Q9UI08       | 2 EVL_HUMAN Isoform 1 of Ena/VASP-like protein OS=Homo sapiens GN=EVL;>sp Q9UI08 EVL_HUMAN Ena/VASP-like protein OS=H       | 7.75E-108 |        |
| Q9UI09                | NDUAC_HUMAN NADH dehydrogenase [ubiquinone] 1 alpha subcomplex subunit 12 OS=Homo sapiens GN=NDUFA12 PE=1 SV=1              |           | 135.61 |
| Q9UI10                | EI2BD_HUMAN Translation initiation factor eIF-2B subunit delta OS=Homo sapiens GN=EIF2B4 PE=1 SV=2                          |           | 66.72  |
| Q9UI10-2              | EI2BD_HUMAN Isoform 2 of Translation initiation factor eIF-2B subunit delta OS=Homo sapiens GN=EIF2B4                       |           | 71.51  |
| Q9UI10-2;Q9UI10;Q9UI1 | 2 EI2BD_HUMAN Isoform 2 of Translation initiation factor eIF-2B subunit delta OS=Homo sapiens GN=EIF2B4;>sp Q9UI10 EI2BD_HU | 8.67E-13  |        |
| Q9UI10-3              | EI2BD_HUMAN Isoform 3 of Translation initiation factor eIF-2B subunit delta OS=Homo sapiens GN=EIF2B4                       |           | 66.72  |
| Q9UI12;Q9UI12-2       | VATH_HUMAN V-type proton ATPase subunit H OS=Homo sapiens GN=ATP6V1H PE=1 SV=1;>sp Q9UI12-2 VATH_HUMAN Isoform 2 c          | 1.22E-07  |        |
| Q9UI14                | PRAF1_HUMAN Prenylated Rab acceptor protein 1 OS=Homo sapiens GN=RABAC1 PE=1 SV=1                                           | 1.08E-23  |        |

|                       |                                                                                                                         |           |        |
|-----------------------|-------------------------------------------------------------------------------------------------------------------------|-----------|--------|
| Q9UI15                | TAGL3_HUMAN Transgelin-3 OS=Homo sapiens GN=TAGLN3 PE=1 SV=2                                                            |           | 138.02 |
| Q9UI17                | M2GD_HUMAN Dimethylglycine dehydrogenase, mitochondrial OS=Homo sapiens GN=DMGDH PE=1 SV=2                              |           | 66.22  |
| Q9UI26-2;Q9UI26       | 2 IPO11_HUMAN Isoform 2 of Importin-11 OS=Homo sapiens GN=IPO11;>sp Q9UI26 IPO11_HUMAN Importin-11 OS=Homo sapiens      | 9.69E-45  |        |
| Q9UI30                | TR112_HUMAN tRNA methyltransferase 112 homolog OS=Homo sapiens GN=TRMT112 PE=1 SV=1                                     |           | 215.4  |
| Q9UI33                | SCNBA_HUMAN Sodium channel protein type 11 subunit alpha OS=Homo sapiens GN=SCN11A PE=1 SV=2                            |           | 17.9   |
| Q9UI33-2              | SCNBA_HUMAN Isoform 2 of Sodium channel protein type 11 subunit alpha OS=Homo sapiens GN=SCN11A                         |           | 17.9   |
| Q9UI33-3              | SCNBA_HUMAN Isoform 3 of Sodium channel protein type 11 subunit alpha OS=Homo sapiens GN=SCN11A                         |           | 17.9   |
| Q9UI46                | DNAI1_HUMAN Dynein intermediate chain 1, axonemal OS=Homo sapiens GN=DNAI1 PE=1 SV=1                                    |           | 18.53  |
| Q9UIA0                | CYH4_HUMAN Cytohesin-4 OS=Homo sapiens GN=CYTH4 PE=1 SV=1                                                               |           | 24.94  |
| Q9UIA9                | XPO7_HUMAN Exportin-7 OS=Homo sapiens GN=XPO7 PE=1 SV=3                                                                 |           | 20.39  |
| Q9UID3;Q9UID3-2       | FFR_HUMAN Protein fat-free homolog OS=Homo sapiens GN=FFR PE=1 SV=2;>sp Q9UID3-2 FFR_HUMAN Isoform 2 of Protein fat-fre | 9.10E-08  |        |
| Q9UIF9                | BAZ2A_HUMAN Bromodomain adjacent to zinc finger domain protein 2A OS=Homo sapiens GN=BAZ2A PE=1 SV=4                    |           | 39.68  |
| Q9UIF9-2              | BAZ2A_HUMAN Isoform 1 of Bromodomain adjacent to zinc finger domain protein 2A OS=Homo sapiens GN=BAZ2A                 |           | 39.68  |
| Q9UIF9-3              | BAZ2A_HUMAN Isoform 3 of Bromodomain adjacent to zinc finger domain protein 2A OS=Homo sapiens GN=BAZ2A                 |           | 39.68  |
| Q9UIG0                | BAZ1B_HUMAN Tyrosine-protein kinase BAZ1B OS=Homo sapiens GN=BAZ1B PE=1 SV=2                                            |           |        |
| Q9UIG0-2              | BAZ1B_HUMAN Isoform 2 of Tyrosine-protein kinase BAZ1B OS=Homo sapiens GN=BAZ1B                                         |           |        |
| Q9UIG0;Q9UIG0-2       | BAZ1B_HUMAN Tyrosine-protein kinase BAZ1B OS=Homo sapiens GN=BAZ1B PE=1 SV=2;>sp Q9UIG0-2 BAZ1B_HUMAN Isoform 2 o       | 4.60E-130 |        |
| Q9UII2                | ATIF1_HUMAN ATPase inhibitor, mitochondrial OS=Homo sapiens GN=ATPIF1 PE=1 SV=1                                         |           | 33.18  |
| Q9UIJ7                | KAD3_HUMAN GTP:AMP phosphotransferase, mitochondrial OS=Homo sapiens GN=AK3 PE=1 SV=4                                   |           | 130.57 |
| Q9UIL1                | SCOC_HUMAN Short coiled-coil protein OS=Homo sapiens GN=SCOC PE=1 SV=2                                                  |           | 28.29  |
| Q9UIL1-2              | SCOC_HUMAN Isoform 2 of Short coiled-coil protein OS=Homo sapiens GN=SCOC                                               |           | 28.29  |
| Q9UIL1-3              | SCOC_HUMAN Isoform 3 of Short coiled-coil protein OS=Homo sapiens GN=SCOC                                               |           | 28.29  |
| Q9UIL1-4              | SCOC_HUMAN Isoform 4 of Short coiled-coil protein OS=Homo sapiens GN=SCOC                                               |           | 7.83   |
| Q9UIQ6                | LCAP_HUMAN Leucyl-cystinyl aminopeptidase OS=Homo sapiens GN=LNPEP PE=1 SV=3                                            |           | 357.93 |
| Q9UIQ6-2              | LCAP_HUMAN Isoform 2 of Leucyl-cystinyl aminopeptidase OS=Homo sapiens GN=LNPEP                                         |           | 357.93 |
| Q9UIQ6-3              | LCAP_HUMAN Isoform 3 of Leucyl-cystinyl aminopeptidase OS=Homo sapiens GN=LNPEP                                         |           | 357.93 |
| Q9UIQ6;Q9UIQ6-2;Q9UIQ | LCAP_HUMAN Leucyl-cystinyl aminopeptidase OS=Homo sapiens GN=LNPEP PE=1 SV=3;>sp Q9UIQ6-2 LCAP_HUMAN Isoform 2 of Le    | 8.16E-75  |        |
| Q9UIU6                | SIX4_HUMAN Homeobox protein SIX4 OS=Homo sapiens GN=SIX4 PE=1 SV=2                                                      | 4.71E-07  |        |
| Q9UIV1                | CNOT7_HUMAN CCR4-NOT transcription complex subunit 7 OS=Homo sapiens GN=CNOT7 PE=1 SV=3                                 |           | 107.03 |
| Q9UJ41                | RABX5_HUMAN Rab5 GDP/GTP exchange factor OS=Homo sapiens GN=RABGEF1 PE=1 SV=2                                           |           |        |
| Q9UJ41-2              | RABX5_HUMAN Isoform 2 of Rab5 GDP/GTP exchange factor OS=Homo sapiens GN=RABGEF1                                        |           |        |
| Q9UJ41-3              | RABX5_HUMAN Isoform 3 of Rab5 GDP/GTP exchange factor OS=Homo sapiens GN=RABGEF1                                        |           |        |
| Q9UJ68                | MSRA_HUMAN Mitochondrial peptide methionine sulfoxide reductase OS=Homo sapiens GN=MSRA PE=1 SV=1                       |           |        |
| Q9UJ68-2              | MSRA_HUMAN Isoform 2 of Mitochondrial peptide methionine sulfoxide reductase OS=Homo sapiens GN=MSRA                    |           |        |
| Q9UJ68-3              | MSRA_HUMAN Isoform 3 of Mitochondrial peptide methionine sulfoxide reductase OS=Homo sapiens GN=MSRA                    |           |        |
| Q9UJ68-4              | MSRA_HUMAN Isoform 4 of Mitochondrial peptide methionine sulfoxide reductase OS=Homo sapiens GN=MSRA                    |           |        |
| Q9UJ70                | NAGK_HUMAN N-acetyl-D-glucosamine kinase OS=Homo sapiens GN=NAGK PE=1 SV=4                                              | 1.82E-51  |        |
| Q9UJ98                | STAG3_HUMAN Cohesin subunit SA-3 OS=Homo sapiens GN=STAG3 PE=1 SV=2                                                     |           |        |
| Q9UJ98-2              | STAG3_HUMAN Isoform 2 of Cohesin subunit SA-3 OS=Homo sapiens GN=STAG3                                                  |           |        |
| Q9UJA5                | TRM6_HUMAN tRNA (adenine-N(1)-)-methyltransferase non-catalytic subunit TRM6 OS=Homo sapiens GN=TRMT6 PE=1 SV=1         |           | 21.4   |
| Q9UJA5-2              | TRM6_HUMAN Isoform 2 of tRNA (adenine-N(1)-)-methyltransferase non-catalytic subunit TRM6 OS=Homo sapiens GN=TRMT6      |           | 21.4   |
| Q9UJA5-3              | TRM6_HUMAN Isoform 3 of tRNA (adenine-N(1)-)-methyltransferase non-catalytic subunit TRM6 OS=Homo sapiens GN=TRMT6      |           | 21.4   |
| Q9UJA5;Q9UJA5-2;Q9UJA | TRM6_HUMAN tRNA (adenine-N(1)-)-methyltransferase non-catalytic subunit TRM6 OS=Homo sapiens GN=TRMT6 PE=1 SV=1;>sp Q9  | 2.36E-35  |        |
| Q9UJC3                | HOOK1_HUMAN Protein Hook homolog 1 OS=Homo sapiens GN=HOOK1 PE=1 SV=2                                                   | 2.39E-23  |        |
| Q9UJF2                | NGAP_HUMAN Ras GTPase-activating protein nGAP OS=Homo sapiens GN=RASAL2 PE=1 SV=2                                       |           | 42.96  |
| Q9UJG1-3;D3DTG5;Q9UJC | 3 MSPD1_HUMAN Isoform 3 of Motile sperm domain-containing protein 1 OS=Homo sapiens GN=MOSPD1;>tr D3DTG5 D3DTG5_HUM     | 3.00E-07  |        |
| Q9UJS0                | CMC2_HUMAN Calcium-binding mitochondrial carrier protein Aralar2 OS=Homo sapiens GN=SLC25A13 PE=1 SV=2                  |           | 105.23 |
| Q9UJU6-2;Q9UJU6;Q9UJU | 2 DBNL_HUMAN Isoform 2 of Drebrin-like protein OS=Homo sapiens GN=DBNL;>sp Q9UJU6 DBNL_HUMAN Drebrin-like protein OS=H  | 1.01E-268 |        |
| Q9UJU6;Q9UJU6-2;Q9UJU | DBNL_HUMAN Drebrin-like protein OS=Homo sapiens GN=DBNL PE=1 SV=1;>sp Q9UJU6-2 DBNL_HUMAN Isoform 2 of Drebrin-like p   | 0         |        |
| Q9UJV8                | PURG_HUMAN Purine-rich element-binding protein gamma OS=Homo sapiens GN=PURG PE=2 SV=1                                  |           | 8.57   |
| Q9UJV8-2              | PURG_HUMAN Isoform 2 of Purine-rich element-binding protein gamma OS=Homo sapiens GN=PURG                               |           | 8.57   |
| Q9UJV9                | DDX41_HUMAN Probable ATP-dependent RNA helicase DDX41 OS=Homo sapiens GN=DDX41 PE=1 SV=2                                |           |        |
| Q9UJW0                | DCTN4_HUMAN Dynactin subunit 4 OS=Homo sapiens GN=DCTN4 PE=1 SV=1                                                       |           |        |
| Q9UJW0-3              | DCTN4_HUMAN Isoform 3 of Dynactin subunit 4 OS=Homo sapiens GN=DCTN4                                                    |           |        |
| Q9UJW0-3;Q9UJW0;Q9UJ  | 3 DCTN4_HUMAN Isoform 3 of Dynactin subunit 4 OS=Homo sapiens GN=DCTN4;>sp Q9UJW0 DCTN4_HUMAN Dynactin subunit 4 O      | 8.18E-24  |        |
| Q9UJX2                | CDC23_HUMAN Cell division cycle protein 23 homolog OS=Homo sapiens GN=CDC23 PE=1 SV=3                                   |           |        |
| Q9UJX2-3              | CDC23_HUMAN Isoform 3 of Cell division cycle protein 23 homolog OS=Homo sapiens GN=CDC23                                |           |        |
| Q9UJX3                | APC7_HUMAN Anaphase-promoting complex subunit 7 OS=Homo sapiens GN=ANAPC7 PE=1 SV=4                                     |           | 103.93 |
| Q9UJX3-2              | APC7_HUMAN Isoform 2 of Anaphase-promoting complex subunit 7 OS=Homo sapiens GN=ANAPC7                                  |           | 65.91  |
| Q9UJX3;A5D8X2;Q4KMX6  | APC7_HUMAN Anaphase-promoting complex subunit 7 OS=Homo sapiens GN=ANAPC7 PE=1 SV=4;>tr A5D8X2 A5D8X2_HUMAN Ana         | 1.11E-19  |        |
| Q9UJX4                | APC5_HUMAN Anaphase-promoting complex subunit 5 OS=Homo sapiens GN=ANAPC5 PE=1 SV=2                                     |           |        |

|                       |                                                                                                                         |           |        |
|-----------------------|-------------------------------------------------------------------------------------------------------------------------|-----------|--------|
| Q9UJX5;Q9UJX5-2       | APC4_HUMAN Anaphase-promoting complex subunit 4 OS=Homo sapiens GN=ANAPC4 PE=1 SV=2;>sp Q9UJX5-2 APC4_HUMAN Isof        | 9.32E-12  |        |
| Q9UJY4                | GGA2_HUMAN ADP-ribosylation factor-binding protein GGA2 OS=Homo sapiens GN=GGA2 PE=1 SV=3                               |           | 43.99  |
| Q9UJY5                | GGA1_HUMAN ADP-ribosylation factor-binding protein GGA1 OS=Homo sapiens GN=GGA1 PE=1 SV=1                               |           | 33.72  |
| Q9UJY5-2              | GGA1_HUMAN Isoform 2 of ADP-ribosylation factor-binding protein GGA1 OS=Homo sapiens GN=GGA1                            |           |        |
| Q9UJY5;Q9UJY5-2       | GGA1_HUMAN ADP-ribosylation factor-binding protein GGA1 OS=Homo sapiens GN=GGA1 PE=1 SV=1;>sp Q9UJY5-2 GGA1_HUMAN       | 1.84E-12  |        |
| Q9UJZ1                | STML2_HUMAN Stomatin-like protein 2 OS=Homo sapiens GN=STOML2 PE=1 SV=1                                                 |           | 792.06 |
| Q9UK22                | FBX2_HUMAN F-box only protein 2 OS=Homo sapiens GN=FBXO2 PE=1 SV=2                                                      | 1.76E-09  |        |
| Q9UK41                | VPS28_HUMAN Vacuolar protein sorting-associated protein 28 homolog OS=Homo sapiens GN=VPS28 PE=1 SV=1                   | 1.18E-25  |        |
| Q9UK45                | LSM7_HUMAN U6 snRNA-associated Sm-like protein LSm7 OS=Homo sapiens GN=LSM7 PE=1 SV=1                                   |           | 101.58 |
| Q9UK59                | DBR1_HUMAN Lariat debranching enzyme OS=Homo sapiens GN=DBR1 PE=1 SV=2                                                  |           | 38.11  |
| Q9UK59-2              | DBR1_HUMAN Isoform 2 of Lariat debranching enzyme OS=Homo sapiens GN=DBR1                                               |           | 0.85   |
| Q9UK76-2;Q9UK76;Q9UK  | 2 HN1_HUMAN Isoform 2 of Hematological and neurological expressed 1 protein OS=Homo sapiens GN=HN1;>sp Q9UK76 HN1_HUM   | 8.76E-11  |        |
| Q9UK99                | FBX3_HUMAN F-box only protein 3 OS=Homo sapiens GN=FBXO3 PE=1 SV=3                                                      |           |        |
| Q9UK99-2              | FBX3_HUMAN Isoform 2 of F-box only protein 3 OS=Homo sapiens GN=FBXO3                                                   |           |        |
| Q9UK99-3              | FBX3_HUMAN Isoform 3 of F-box only protein 3 OS=Homo sapiens GN=FBXO3                                                   |           |        |
| Q9UKA9                | PTBP2_HUMAN Polypyrimidine tract-binding protein 2 OS=Homo sapiens GN=PTBP2 PE=1 SV=1                                   |           | 61.1   |
| Q9UKA9-2              | PTBP2_HUMAN Isoform 2 of Polypyrimidine tract-binding protein 2 OS=Homo sapiens GN=PTBP2                                |           | 61.1   |
| Q9UKA9-2;Q9UKA9;Q9UK  | 2 PTBP2_HUMAN Isoform 2 of Polypyrimidine tract-binding protein 2 OS=Homo sapiens GN=PTBP2;>sp Q9UKA9 PTBP2_HUMAN Polyp | 6.13E-23  |        |
| Q9UKA9-3              | PTBP2_HUMAN Isoform 3 of Polypyrimidine tract-binding protein 2 OS=Homo sapiens GN=PTBP2                                |           | 61.1   |
| Q9UKA9-4              | PTBP2_HUMAN Isoform 4 of Polypyrimidine tract-binding protein 2 OS=Homo sapiens GN=PTBP2                                |           | 61.1   |
| Q9UKA9-5              | PTBP2_HUMAN Isoform 5 of Polypyrimidine tract-binding protein 2 OS=Homo sapiens GN=PTBP2                                |           | 61.1   |
| Q9UKA9-6              | PTBP2_HUMAN Isoform 6 of Polypyrimidine tract-binding protein 2 OS=Homo sapiens GN=PTBP2                                |           | 61.1   |
| Q9UKD2                | MRT4_HUMAN mRNA turnover protein 4 homolog OS=Homo sapiens GN=MRTO4 PE=1 SV=2                                           |           | 165.44 |
| Q9UKE5                | TNIK_HUMAN TRAF2 and NCK-interacting protein kinase OS=Homo sapiens GN=TNIK PE=1 SV=1                                   |           | 103.98 |
| Q9UKE5-2              | TNIK_HUMAN Isoform 2 of TRAF2 and NCK-interacting protein kinase OS=Homo sapiens GN=TNIK                                |           | 99.33  |
| Q9UKE5-3              | TNIK_HUMAN Isoform 3 of TRAF2 and NCK-interacting protein kinase OS=Homo sapiens GN=TNIK                                |           | 100.18 |
| Q9UKE5-4              | TNIK_HUMAN Isoform 4 of TRAF2 and NCK-interacting protein kinase OS=Homo sapiens GN=TNIK                                |           | 103.98 |
| Q9UKE5-5              | TNIK_HUMAN Isoform 5 of TRAF2 and NCK-interacting protein kinase OS=Homo sapiens GN=TNIK                                |           | 95.53  |
| Q9UKE5-6              | TNIK_HUMAN Isoform 6 of TRAF2 and NCK-interacting protein kinase OS=Homo sapiens GN=TNIK                                |           | 99.33  |
| Q9UKE5-7              | TNIK_HUMAN Isoform 7 of TRAF2 and NCK-interacting protein kinase OS=Homo sapiens GN=TNIK                                |           | 100.18 |
| Q9UKE5-8              | TNIK_HUMAN Isoform 8 of TRAF2 and NCK-interacting protein kinase OS=Homo sapiens GN=TNIK                                |           | 95.53  |
| Q9UKF6                | CPSF3_HUMAN Cleavage and polyadenylation specificity factor subunit 3 OS=Homo sapiens GN=CPSF3 PE=1 SV=1                |           |        |
| Q9UKG1;B4DQX8         | DP13A_HUMAN DCC-interacting protein 13-alpha OS=Homo sapiens GN=APPL1 PE=1 SV=1;>tr B4DQX8 B4DQX8_HUMAN cDNA FLJ5       | 1.21E-06  |        |
| Q9UKG9;C9J3D7;B4DT97; | OCTC_HUMAN Peroxisomal carnitine O-octanoyltransferase OS=Homo sapiens GN=CROT PE=1 SV=2;>tr C9J3D7 C9J3D7_HUMAN Un     | 2.33E-06  |        |
| Q9UKH3                | ENK4_HUMAN HERV-K_6q14.1 provirus ancestral Env polyprotein OS=Homo sapiens PE=1 SV=1                                   |           |        |
| Q9UKI8                | TLK1_HUMAN Serine/threonine-protein kinase tousled-like 1 OS=Homo sapiens GN=TLK1 PE=1 SV=2                             |           | 11.08  |
| Q9UKI8-2              | TLK1_HUMAN Isoform 2 of Serine/threonine-protein kinase tousled-like 1 OS=Homo sapiens GN=TLK1                          |           | 11.08  |
| Q9UKI8-3              | TLK1_HUMAN Isoform 3 of Serine/threonine-protein kinase tousled-like 1 OS=Homo sapiens GN=TLK1                          |           | 11.08  |
| Q9UKJ0-2              | PILRB_HUMAN Isoform 2 of Paired immunoglobulin-like type 2 receptor beta OS=Homo sapiens GN=PILRB                       |           |        |
| Q9UKJ0-3              | PILRB_HUMAN Isoform 3 of Paired immunoglobulin-like type 2 receptor beta OS=Homo sapiens GN=PILRB                       |           |        |
| Q9UKJ3                | GPTC8_HUMAN G patch domain-containing protein 8 OS=Homo sapiens GN=GPATCH8 PE=1 SV=2                                    |           | 102.72 |
| Q9UKJ3-2              | GPTC8_HUMAN Isoform 2 of G patch domain-containing protein 8 OS=Homo sapiens GN=GPATCH8                                 |           | 102.72 |
| Q9UKK3                | PARP4_HUMAN Poly [ADP-ribose] polymerase 4 OS=Homo sapiens GN=PARP4 PE=1 SV=3                                           |           | 41.39  |
| Q9UKK6                | NXT1_HUMAN NTF2-related export protein 1 OS=Homo sapiens GN=NXT1 PE=1 SV=1                                              |           |        |
| Q9UKK9                | NUDT5_HUMAN ADP-sugar pyrophosphatase OS=Homo sapiens GN=NUDT5 PE=1 SV=1                                                |           | 18.06  |
| Q9UKL0                | RCOR1_HUMAN REST corepressor 1 OS=Homo sapiens GN=RCOR1 PE=1 SV=1                                                       |           | 82.28  |
| Q9UKM9                | RALY_HUMAN RNA-binding protein Raly OS=Homo sapiens GN=RALY PE=1 SV=1                                                   |           | 241.28 |
| Q9UKM9-2              | RALY_HUMAN Isoform 1 of RNA-binding protein Raly OS=Homo sapiens GN=RALY                                                |           | 241.28 |
| Q9UKM9;Q9UKM9-2       | RALY_HUMAN RNA-binding protein Raly OS=Homo sapiens GN=RALY PE=1 SV=1;>sp Q9UKM9-2 RALY_HUMAN Isoform 1 of RNA-binc     | 1.45E-120 |        |
| Q9UKN7                | MYO15_HUMAN Myosin-XV OS=Homo sapiens GN=MYO15A PE=1 SV=2                                                               |           |        |
| Q9UKN8                | TF3C4_HUMAN General transcription factor 3C polypeptide 4 OS=Homo sapiens GN=GTF3C4 PE=1 SV=2                           |           | 57.89  |
| Q9UKR5                | ERG28_HUMAN Probable ergosterol biosynthetic protein 28 OS=Homo sapiens GN=C14orf1 PE=1 SV=1                            |           | 37.97  |
| Q9UKS6                | PACN3_HUMAN Protein kinase C and casein kinase substrate in neurons protein 3 OS=Homo sapiens GN=PACSIN3 PE=1 SV=2      |           | 115.6  |
| Q9UKU7;B7Z5W4;Q6ZWP   | ACAD8_HUMAN Isobutyryl-CoA dehydrogenase, mitochondrial OS=Homo sapiens GN=ACAD8 PE=1 SV=1;>tr B7Z5W4 B7Z5W4_HUM        | 4.21E-06  |        |
| Q9UKV0                | HDAC9_HUMAN Histone deacetylase 9 OS=Homo sapiens GN=HDAC9 PE=1 SV=2                                                    |           |        |
| Q9UKV0-2              | HDAC9_HUMAN Isoform 2 of Histone deacetylase 9 OS=Homo sapiens GN=HDAC9                                                 |           |        |
| Q9UKV0-3              | HDAC9_HUMAN Isoform 3 of Histone deacetylase 9 OS=Homo sapiens GN=HDAC9                                                 |           |        |
| Q9UKV0-4              | HDAC9_HUMAN Isoform 4 of Histone deacetylase 9 OS=Homo sapiens GN=HDAC9                                                 |           |        |
| Q9UKV0-5              | HDAC9_HUMAN Isoform 5 of Histone deacetylase 9 OS=Homo sapiens GN=HDAC9                                                 |           |        |
| Q9UKV0-6              | HDAC9_HUMAN Isoform 6 of Histone deacetylase 9 OS=Homo sapiens GN=HDAC9                                                 |           |        |
| Q9UKV0-7              | HDAC9_HUMAN Isoform 7 of Histone deacetylase 9 OS=Homo sapiens GN=HDAC9                                                 |           |        |

|                          |                                                                                                                            |           |        |
|--------------------------|----------------------------------------------------------------------------------------------------------------------------|-----------|--------|
| Q9UKV3                   | ACINU_HUMAN Apoptotic chromatin condensation inducer in the nucleus OS=Homo sapiens GN=ACIN1 PE=1 SV=2                     |           | 296.26 |
| Q9UKV3-2                 | ACINU_HUMAN Isoform 2 of Apoptotic chromatin condensation inducer in the nucleus OS=Homo sapiens GN=ACIN1                  |           | 227.54 |
| Q9UKV3-3                 | ACINU_HUMAN Isoform 3 of Apoptotic chromatin condensation inducer in the nucleus OS=Homo sapiens GN=ACIN1                  |           | 227.54 |
| Q9UKV3;Q9UKV3-2;Q9UKV3-3 | ACINU_HUMAN Apoptotic chromatin condensation inducer in the nucleus OS=Homo sapiens GN=ACIN1 PE=1 SV=2;>sp Q9UKV3-2 AC     | 6.19E-63  |        |
| Q9UKX2                   | MYH2_HUMAN Myosin-2 OS=Homo sapiens GN=MYH2 PE=1 SV=1                                                                      |           | 140.79 |
| Q9UKX3                   | MYH13_HUMAN Myosin-13 OS=Homo sapiens GN=MYH13 PE=1 SV=2                                                                   |           | 82.89  |
| Q9UKX7;Q8N6V5;B4E2D3     | NUP50_HUMAN Nuclear pore complex protein Nup50 OS=Homo sapiens GN=NUP50 PE=1 SV=2;>tr Q8N6V5 Q8N6V5_HUMAN HCG19            | 9.14E-66  |        |
| Q9UKY1                   | ZHX1_HUMAN Zinc fingers and homeoboxes protein 1 OS=Homo sapiens GN=ZHX1 PE=1 SV=1                                         |           |        |
| Q9UKY3                   | CES1P_HUMAN Putative inactive carboxylesterase 4 OS=Homo sapiens GN=CES1P1 PE=5 SV=2                                       |           |        |
| Q9UKY7                   | CDV3_HUMAN Protein CDV3 homolog OS=Homo sapiens GN=CDV3 PE=1 SV=1                                                          |           | 205.14 |
| Q9UKY7-2                 | CDV3_HUMAN Isoform 2 of Protein CDV3 homolog OS=Homo sapiens GN=CDV3                                                       |           | 133.23 |
| Q9UKY7-3                 | CDV3_HUMAN Isoform 3 of Protein CDV3 homolog OS=Homo sapiens GN=CDV3                                                       |           | 19.45  |
| Q9UKY7;Q9UKY7-2          | CDV3_HUMAN Protein CDV3 homolog OS=Homo sapiens GN=CDV3 PE=1 SV=1;>sp Q9UKY7-2 CDV3_HUMAN Isoform 2 of Protein CC          | 3.34E-51  |        |
| Q9UKZ1                   | CB029_HUMAN UPF0760 protein C2orf29 OS=Homo sapiens GN=C2orf29 PE=1 SV=1                                                   |           | 76.41  |
| Q9UL01                   | DSE_HUMAN Dermatan-sulfate epimerase OS=Homo sapiens GN=DSE PE=1 SV=1                                                      |           |        |
| Q9UL15                   | BAG5_HUMAN BAG family molecular chaperone regulator 5 OS=Homo sapiens GN=BAG5 PE=1 SV=1                                    |           |        |
| Q9UL15-2                 | BAG5_HUMAN Isoform 2 of BAG family molecular chaperone regulator 5 OS=Homo sapiens GN=BAG5                                 |           |        |
| Q9UL15-2;A8K5J7;Q9UL15-2 | BAG5_HUMAN Isoform 2 of BAG family molecular chaperone regulator 5 OS=Homo sapiens GN=BAG5;>tr A8K5J7 A8K5J7_HUMAN         | 8.21E-08  |        |
| Q9UL16                   | CCD19_HUMAN Coiled-coil domain-containing protein 19, mitochondrial OS=Homo sapiens GN=CCDC19 PE=1 SV=2                    |           | 54.85  |
| Q9UL25                   | RAB21_HUMAN Ras-related protein Rab-21 OS=Homo sapiens GN=RAB21 PE=1 SV=3                                                  |           | 614.52 |
| Q9UL26                   | RB22A_HUMAN Ras-related protein Rab-22A OS=Homo sapiens GN=RAB22A PE=1 SV=2                                                |           | 155.27 |
| Q9UL33                   | TPC2L_HUMAN Trafficking protein particle complex subunit 2-like protein OS=Homo sapiens GN=TRAPPC2L PE=1 SV=1              |           |        |
| Q9UL33-2                 | TPC2L_HUMAN Isoform 2 of Trafficking protein particle complex subunit 2-like protein OS=Homo sapiens GN=TRAPPC2L           |           |        |
| Q9UL33;Q9UL33-2          | TPC2L_HUMAN Trafficking protein particle complex subunit 2-like protein OS=Homo sapiens GN=TRAPPC2L PE=1 SV=1;>sp Q9UL33-2 | 6.68E-05  |        |
| Q9UL42                   | PNMA2_HUMAN Paraneoplastic antigen Ma2 OS=Homo sapiens GN=PNMA2 PE=1 SV=2                                                  |           |        |
| Q9UL46                   | PSME2_HUMAN Proteasome activator complex subunit 2 OS=Homo sapiens GN=PSME2 PE=1 SV=4                                      |           | 855.68 |
| Q9UL63                   | MKLN1_HUMAN Muskelin OS=Homo sapiens GN=MKLN1 PE=1 SV=2                                                                    |           |        |
| Q9UL63-2                 | MKLN1_HUMAN Isoform 2 of Muskelin OS=Homo sapiens GN=MKLN1                                                                 |           |        |
| Q9ULA0                   | DNPEP_HUMAN Aspartyl aminopeptidase OS=Homo sapiens GN=DNPEP PE=1 SV=1                                                     |           | 49.67  |
| Q9ULC3                   | RAB23_HUMAN Ras-related protein Rab-23 OS=Homo sapiens GN=RAB23 PE=1 SV=1                                                  |           | 88.23  |
| Q9ULC4                   | MCTS1_HUMAN Malignant T cell-amplified sequence 1 OS=Homo sapiens GN=MCTS1 PE=1 SV=1                                       |           | 535.26 |
| Q9ULC4-2                 | MCTS1_HUMAN Isoform 2 of Malignant T cell-amplified sequence 1 OS=Homo sapiens GN=MCTS1                                    |           | 534.23 |
| Q9ULC4-3                 | MCTS1_HUMAN Isoform 3 of Malignant T cell-amplified sequence 1 OS=Homo sapiens GN=MCTS1                                    |           | 535.26 |
| Q9ULC4-3;Q9ULC4;Q9ULC3   | MCTS1_HUMAN Isoform 3 of Malignant T cell-amplified sequence 1 OS=Homo sapiens GN=MCTS1;>sp Q9ULC4 MCTS1_HUMAN Mal         | 1.50E-164 |        |
| Q9ULC4;B4DGY2;Q9ULC4     | MCTS1_HUMAN Malignant T cell-amplified sequence 1 OS=Homo sapiens GN=MCTS1 PE=1 SV=1;>tr B4DGY2 B4DGY2_HUMAN cDNA          | 3.19E-137 |        |
| Q9ULC5-3;Q9ULC5;Q9ULC3   | ACSL5_HUMAN Isoform 2 of Long-chain-fatty-acid--CoA ligase 5 OS=Homo sapiens GN=ACSL5;>sp Q9ULC5 ACSL5_HUMAN Long-c        | 4.85E-12  |        |
| Q9ULD0                   | OGDHL_HUMAN 2-oxoglutarate dehydrogenase-like, mitochondrial OS=Homo sapiens GN=OGDHL PE=2 SV=3                            |           | 34.96  |
| Q9ULD0-2                 | OGDHL_HUMAN Isoform 2 of 2-oxoglutarate dehydrogenase-like, mitochondrial OS=Homo sapiens GN=OGDHL                         |           | 34.96  |
| Q9ULD0-3                 | OGDHL_HUMAN Isoform 3 of 2-oxoglutarate dehydrogenase-like, mitochondrial OS=Homo sapiens GN=OGDHL                         |           | 34.96  |
| Q9ULD5                   | ZN777_HUMAN Zinc finger protein 777 OS=Homo sapiens GN=ZNF777 PE=1 SV=2                                                    |           | 31.41  |
| Q9ULD5-2                 | ZN777_HUMAN Isoform 2 of Zinc finger protein 777 OS=Homo sapiens GN=ZNF777                                                 |           | 31.41  |
| Q9ULD5-3                 | ZN777_HUMAN Isoform 3 of Zinc finger protein 777 OS=Homo sapiens GN=ZNF777                                                 |           | 31.41  |
| Q9ULD9                   | ZN608_HUMAN Zinc finger protein 608 OS=Homo sapiens GN=ZNF608 PE=1 SV=4                                                    |           |        |
| Q9ULD9-2                 | ZN608_HUMAN Isoform 2 of Zinc finger protein 608 OS=Homo sapiens GN=ZNF608                                                 |           |        |
| Q9ULD9;Q9ULD9-2          | ZN608_HUMAN Zinc finger protein 608 OS=Homo sapiens GN=ZNF608 PE=1 SV=4;>sp Q9ULD9-2 ZN608_HUMAN Isoform 2 of Zinc f       | 2.78E-05  |        |
| Q9ULE0                   | WWC3_HUMAN Protein WWC3 OS=Homo sapiens GN=WWC3 PE=2 SV=3                                                                  |           |        |
| Q9ULE4                   | F184B_HUMAN Protein FAM184B OS=Homo sapiens GN=FAM184B PE=2 SV=3                                                           |           |        |
| Q9ULE6                   | PALD_HUMAN Paladin OS=Homo sapiens GN=PALD PE=1 SV=3                                                                       |           |        |
| Q9ULG1                   | INO80_HUMAN DNA helicase INO80 OS=Homo sapiens GN=INO80 PE=1 SV=2                                                          |           |        |
| Q9ULH0                   | KDIS_HUMAN Kinase D-interacting substrate of 220 kDa OS=Homo sapiens GN=KIDINS220 PE=1 SV=3                                |           |        |
| Q9ULH0-2                 | KDIS_HUMAN Isoform 2 of Kinase D-interacting substrate of 220 kDa OS=Homo sapiens GN=KIDINS220                             |           |        |
| Q9ULH0-3                 | KDIS_HUMAN Isoform 3 of Kinase D-interacting substrate of 220 kDa OS=Homo sapiens GN=KIDINS220                             |           |        |
| Q9ULH0-4                 | KDIS_HUMAN Isoform 4 of Kinase D-interacting substrate of 220 kDa OS=Homo sapiens GN=KIDINS220                             |           |        |
| Q9ULH1                   | ASAP1_HUMAN Arf-GAP with SH3 domain, ANK repeat and PH domain-containing protein 1 OS=Homo sapiens GN=ASAP1 PE=1 SV=4      |           | 6.52   |
| Q9ULH1-2                 | ASAP1_HUMAN Isoform 1 of Arf-GAP with SH3 domain, ANK repeat and PH domain-containing protein 1 OS=Homo sapiens GN=ASAP1   |           | 6.52   |
| Q9ULH1-2;Q9ULH1          | ASAP1_HUMAN Isoform 1 of Arf-GAP with SH3 domain, ANK repeat and PH domain-containing protein 1 OS=Homo sapiens GN=ASA     | 1.14E-62  |        |
| Q9ULI0                   | ATD2B_HUMAN ATPase family AAA domain-containing protein 2B OS=Homo sapiens GN=ATAD2B PE=1 SV=3                             |           |        |
| Q9ULI0-2                 | ATD2B_HUMAN Isoform 2 of ATPase family AAA domain-containing protein 2B OS=Homo sapiens GN=ATAD2B                          |           |        |
| Q9ULJ1                   | ODF2L_HUMAN Outer dense fiber protein 2-like OS=Homo sapiens GN=ODF2L PE=2 SV=2                                            |           | 24.48  |
| Q9ULJ1-2                 | ODF2L_HUMAN Isoform 2 of Outer dense fiber protein 2-like OS=Homo sapiens GN=ODF2L                                         |           | 24.48  |
| Q9ULJ1-3                 | ODF2L_HUMAN Isoform 3 of Outer dense fiber protein 2-like OS=Homo sapiens GN=ODF2L                                         |           | 24.48  |



|                              |                                                                                                                         |           |        |
|------------------------------|-------------------------------------------------------------------------------------------------------------------------|-----------|--------|
| Q9ULJ1-4                     | ODF2L_HUMAN Isoform 4 of Outer dense fiber protein 2-like OS=Homo sapiens GN=ODF2L                                      |           | 24.48  |
| Q9ULJ1-5                     | ODF2L_HUMAN Isoform 5 of Outer dense fiber protein 2-like OS=Homo sapiens GN=ODF2L                                      |           | 23.53  |
| Q9ULJ3                       | ZN295_HUMAN Zinc finger protein 295 OS=Homo sapiens GN=ZNF295 PE=1 SV=2                                                 |           |        |
| Q9ULJ3-2                     | ZN295_HUMAN Isoform 2 of Zinc finger protein 295 OS=Homo sapiens GN=ZNF295                                              |           |        |
| Q9ULJ7                       | ANR50_HUMAN Ankyrin repeat domain-containing protein 50 OS=Homo sapiens GN=ANKRD50 PE=1 SV=4                            |           |        |
| Q9ULK2                       | AT7L1_HUMAN Ataxin-7-like protein 1 OS=Homo sapiens GN=ATXN7L1 PE=2 SV=3                                                |           |        |
| Q9ULK2-3                     | AT7L1_HUMAN Isoform 3 of Ataxin-7-like protein 1 OS=Homo sapiens GN=ATXN7L1                                             |           |        |
| Q9ULK4                       | MED23_HUMAN Mediator of RNA polymerase II transcription subunit 23 OS=Homo sapiens GN=MED23 PE=1 SV=2                   |           |        |
| Q9ULK4-2                     | MED23_HUMAN Isoform 2 of Mediator of RNA polymerase II transcription subunit 23 OS=Homo sapiens GN=MED23                |           |        |
| Q9ULK4-3                     | MED23_HUMAN Isoform 3 of Mediator of RNA polymerase II transcription subunit 23 OS=Homo sapiens GN=MED23                |           |        |
| Q9ULK4-4                     | MED23_HUMAN Isoform 4 of Mediator of RNA polymerase II transcription subunit 23 OS=Homo sapiens GN=MED23                |           |        |
| Q9ULK4-5                     | MED23_HUMAN Isoform 5 of Mediator of RNA polymerase II transcription subunit 23 OS=Homo sapiens GN=MED23                |           |        |
| Q9ULK4;Q9ULK4-3;Q9ULK4-5     | MED23_HUMAN Mediator of RNA polymerase II transcription subunit 23 OS=Homo sapiens GN=MED23 PE=1 SV=2;>sp Q9ULK4-3 ME   | 1.67E-10  |        |
| Q9ULL5                       | PRR12_HUMAN Proline-rich protein 12 OS=Homo sapiens GN=PRR12 PE=1 SV=2                                                  |           | 83.89  |
| Q9ULL5-2                     | PRR12_HUMAN Isoform 2 of Proline-rich protein 12 OS=Homo sapiens GN=PRR12                                               |           | 83.89  |
| Q9ULL5-3                     | PRR12_HUMAN Isoform 3 of Proline-rich protein 12 OS=Homo sapiens GN=PRR12                                               |           | 83.89  |
| Q9ULS6                       | KCNS2_HUMAN Potassium voltage-gated channel subfamily S member 2 OS=Homo sapiens GN=KCNS2 PE=2 SV=2                     |           |        |
| Q9ULT8                       | HECTD1_HUMAN E3 ubiquitin-protein ligase HECTD1 OS=Homo sapiens GN=HECTD1 PE=1 SV=3                                     | 4.57E-29  |        |
| Q9ULU4                       | PKCB1_HUMAN Protein kinase C-binding protein 1 OS=Homo sapiens GN=ZMYND8 PE=1 SV=2                                      |           |        |
| Q9ULU4-10                    | PKCB1_HUMAN Isoform 10 of Protein kinase C-binding protein 1 OS=Homo sapiens GN=ZMYND8                                  |           |        |
| Q9ULU4-11                    | PKCB1_HUMAN Isoform 11 of Protein kinase C-binding protein 1 OS=Homo sapiens GN=ZMYND8                                  |           |        |
| Q9ULU4-12                    | PKCB1_HUMAN Isoform 12 of Protein kinase C-binding protein 1 OS=Homo sapiens GN=ZMYND8                                  |           |        |
| Q9ULU4-13                    | PKCB1_HUMAN Isoform 13 of Protein kinase C-binding protein 1 OS=Homo sapiens GN=ZMYND8                                  |           |        |
| Q9ULU4-14                    | PKCB1_HUMAN Isoform 14 of Protein kinase C-binding protein 1 OS=Homo sapiens GN=ZMYND8                                  |           |        |
| Q9ULU4-2                     | PKCB1_HUMAN Isoform 2 of Protein kinase C-binding protein 1 OS=Homo sapiens GN=ZMYND8                                   |           |        |
| Q9ULU4-3                     | PKCB1_HUMAN Isoform 3 of Protein kinase C-binding protein 1 OS=Homo sapiens GN=ZMYND8                                   |           |        |
| Q9ULU4-4                     | PKCB1_HUMAN Isoform 4 of Protein kinase C-binding protein 1 OS=Homo sapiens GN=ZMYND8                                   |           |        |
| Q9ULU4-5                     | PKCB1_HUMAN Isoform 5 of Protein kinase C-binding protein 1 OS=Homo sapiens GN=ZMYND8                                   |           |        |
| Q9ULU4-6                     | PKCB1_HUMAN Isoform 6 of Protein kinase C-binding protein 1 OS=Homo sapiens GN=ZMYND8                                   |           |        |
| Q9ULU4-7                     | PKCB1_HUMAN Isoform 7 of Protein kinase C-binding protein 1 OS=Homo sapiens GN=ZMYND8                                   |           |        |
| Q9ULU4-7;Q9ULU4-11;Q9ULU4-12 | PKCB1_HUMAN Isoform 7 of Protein kinase C-binding protein 1 OS=Homo sapiens GN=ZMYND8;>sp Q9ULU4-11 PKCB1_HUMAN Iso     | 1.49E-09  |        |
| Q9ULU4-8                     | PKCB1_HUMAN Isoform 8 of Protein kinase C-binding protein 1 OS=Homo sapiens GN=ZMYND8                                   |           |        |
| Q9ULU4-9                     | PKCB1_HUMAN Isoform 9 of Protein kinase C-binding protein 1 OS=Homo sapiens GN=ZMYND8                                   |           |        |
| Q9ULV0                       | MYO5B_HUMAN Myosin-Vb OS=Homo sapiens GN=MYO5B PE=1 SV=3                                                                |           |        |
| Q9ULV4                       | COR1C_HUMAN Coronin-1C OS=Homo sapiens GN=CORO1C PE=1 SV=1                                                              |           | 943.9  |
| Q9ULW0                       | TPX2_HUMAN Targeting protein for Xklp2 OS=Homo sapiens GN=TPX2 PE=1 SV=2                                                |           |        |
| Q9ULX9                       | MAFF_HUMAN Transcription factor MafF OS=Homo sapiens GN=MAFF PE=1 SV=2                                                  |           | 17.23  |
| Q9ULZ3;Q9ULZ3-2;Q9ULZ3-3     | ASC_HUMAN Apoptosis-associated speck-like protein containing a CARD OS=Homo sapiens GN=PYCARD PE=1 SV=2;>sp Q9ULZ3-2 A  | 1.67E-14  |        |
| Q9UM00                       | TMCO1_HUMAN Transmembrane and coiled-coil domain-containing protein 1 OS=Homo sapiens GN=TMCO1 PE=1 SV=1                |           | 206.64 |
| Q9UM00-2                     | TMCO1_HUMAN Isoform 2 of Transmembrane and coiled-coil domain-containing protein 1 OS=Homo sapiens GN=TMCO1             |           | 206.64 |
| Q9UM00;B7Z591;C9JX01         | TMCO1_HUMAN Transmembrane and coiled-coil domain-containing protein 1 OS=Homo sapiens GN=TMCO1 PE=1 SV=1;>tr B7Z591 I   | 1.02E-07  |        |
| Q9UM01                       | YLAT1_HUMAN Y+L amino acid transporter 1 OS=Homo sapiens GN=SLC7A7 PE=1 SV=2                                            |           | 29.19  |
| Q9UM13                       | APC10_HUMAN Anaphase-promoting complex subunit 10 OS=Homo sapiens GN=ANAPC10 PE=1 SV=1                                  |           | 68.21  |
| Q9UM22                       | EPDR1_HUMAN Mammalian ependymin-related protein 1 OS=Homo sapiens GN=EPDR1 PE=1 SV=2                                    |           | 220.42 |
| Q9UM22-2                     | EPDR1_HUMAN Isoform 2 of Mammalian ependymin-related protein 1 OS=Homo sapiens GN=EPDR1                                 |           | 3.5    |
| Q9UM54                       | MYO6_HUMAN Myosin-VI OS=Homo sapiens GN=MYO6 PE=1 SV=4                                                                  |           |        |
| Q9UM54-1                     | MYO6_HUMAN Isoform 1 of Myosin-VI OS=Homo sapiens GN=MYO6                                                               |           |        |
| Q9UM54-2                     | MYO6_HUMAN Isoform 2 of Myosin-VI OS=Homo sapiens GN=MYO6                                                               |           |        |
| Q9UM54-4                     | MYO6_HUMAN Isoform 4 of Myosin-VI OS=Homo sapiens GN=MYO6                                                               |           |        |
| Q9UM54-5                     | MYO6_HUMAN Isoform 5 of Myosin-VI OS=Homo sapiens GN=MYO6                                                               |           |        |
| Q9UM54;E1P540;Q9UM54         | MYO6_HUMAN Myosin-VI OS=Homo sapiens GN=MYO6 PE=1 SV=4;>tr E1P540 E1P540_HUMAN Myosin VI, isoform CRA_c OS=Homo         | 4.08E-189 |        |
| Q9UMD9                       | COHA1_HUMAN Collagen alpha-1(XVII) chain OS=Homo sapiens GN=COL17A1 PE=1 SV=3                                           |           |        |
| Q9UMD9-2                     | COHA1_HUMAN Isoform 2 of Collagen alpha-1(XVII) chain OS=Homo sapiens GN=COL17A1                                        |           |        |
| Q9UMD9;Q9UMD9-2              | COHA1_HUMAN Collagen alpha-1(XVII) chain OS=Homo sapiens GN=COL17A1 PE=1 SV=3;>sp Q9UMD9-2 COHA1_HUMAN Isoform 2        | 2.56E-08  |        |
| Q9UMN6                       | MLL4_HUMAN Histone-lysine N-methyltransferase MLL4 OS=Homo sapiens GN=WBP7 PE=1 SV=1                                    |           | 80.91  |
| Q9UMN6-2                     | MLL4_HUMAN Isoform 2 of Histone-lysine N-methyltransferase MLL4 OS=Homo sapiens GN=WBP7                                 |           | 72.97  |
| Q9UMR2;Q9NUU7;Q9UMR2         | DD19B_HUMAN ATP-dependent RNA helicase DDX19B OS=Homo sapiens GN=DDX19B PE=1 SV=1;>sp Q9NUU7 DD19A_HUMAN ATP-           | 7.04E-29  |        |
| Q9UMS0                       | NFU1_HUMAN NFU1 iron-sulfur cluster scaffold homolog, mitochondrial OS=Homo sapiens GN=NFU1 PE=1 SV=2                   |           | 47.8   |
| Q9UMS0-2                     | NFU1_HUMAN Isoform 2 of NFU1 iron-sulfur cluster scaffold homolog, mitochondrial OS=Homo sapiens GN=NFU1                |           | 47.8   |
| Q9UMS0-3                     | NFU1_HUMAN Isoform 3 of NFU1 iron-sulfur cluster scaffold homolog, mitochondrial OS=Homo sapiens GN=NFU1                |           | 47.8   |
| Q9UMS0;C9JGG7;C9J8Q1         | NFU1_HUMAN NFU1 iron-sulfur cluster scaffold homolog, mitochondrial OS=Homo sapiens GN=NFU1 PE=1 SV=2;>tr C9JGG7 C9JGG7 | 2.05E-09  |        |

|                       |                                                                                                                            |           |          |
|-----------------------|----------------------------------------------------------------------------------------------------------------------------|-----------|----------|
| Q9UMS4                | PRP19_HUMAN Pre-processing factor 19 OS=Homo sapiens GN=PRPF19 PE=1 SV=1                                                   |           | 99.89    |
| Q9UMX0;Q9UMX0-2       | UBQL1_HUMAN Ubiquilin-1 OS=Homo sapiens GN=UBQLN1 PE=1 SV=2;>sp Q9UMX0-2 UBQL1_HUMAN Isoform 2 of Ubiquilin-1 OS=          | 1.02E-29  |          |
| Q9UMX5                | NENF_HUMAN Neudesin OS=Homo sapiens GN=NENF PE=1 SV=1                                                                      |           | 253.85   |
| Q9UMY1                | NOL7_HUMAN Nucleolar protein 7 OS=Homo sapiens GN=NOL7 PE=1 SV=2                                                           |           |          |
| Q9UMY1-2              | NOL7_HUMAN Isoform 2 of Nucleolar protein 7 OS=Homo sapiens GN=NOL7                                                        |           |          |
| Q9UMY1;Q9UMY1-2       | NOL7_HUMAN Nucleolar protein 7 OS=Homo sapiens GN=NOL7 PE=1 SV=2;>sp Q9UMY1-2 NOL7_HUMAN Isoform 2 of Nucleolar prot       | 1.85E-18  |          |
| Q9UMY4                | SNX12_HUMAN Sorting nexin-12 OS=Homo sapiens GN=SNX12 PE=1 SV=3                                                            |           | 221.81   |
| Q9UMY4-2              | SNX12_HUMAN Isoform 2 of Sorting nexin-12 OS=Homo sapiens GN=SNX12                                                         |           | 221.81   |
| Q9UMY4;Q3SYF1;Q9UMY4  | SNX12_HUMAN Sorting nexin-12 OS=Homo sapiens GN=SNX12 PE=1 SV=3;>tr Q3SYF1 Q3SYF1_HUMAN Sorting nexin 12 OS=Homc           | 1.83E-15  |          |
| Q9UN36;Q9UN36-3;Q9UN  | NDRG2_HUMAN Protein NDRG2 OS=Homo sapiens GN=NDRG2 PE=1 SV=2;>sp Q9UN36-3 NDRG2_HUMAN Isoform 3 of Protein NDR             | 3.07E-22  |          |
| Q9UN37                | VPS4A_HUMAN Vacuolar protein sorting-associated protein 4A OS=Homo sapiens GN=VPS4A PE=1 SV=1                              | 2.87E-10  |          |
| Q9UN67                | PCDBA_HUMAN Protocadherin beta-10 OS=Homo sapiens GN=PCDHB10 PE=1 SV=1                                                     |           |          |
| Q9UN86                | G3BP2_HUMAN Ras GTPase-activating protein-binding protein 2 OS=Homo sapiens GN=G3BP2 PE=1 SV=2                             |           | 486.82   |
| Q9UN86-2              | G3BP2_HUMAN Isoform B of Ras GTPase-activating protein-binding protein 2 OS=Homo sapiens GN=G3BP2                          |           | 486.82   |
| Q9UN86;A8K6V7;Q9UN86  | G3BP2_HUMAN Ras GTPase-activating protein-binding protein 2 OS=Homo sapiens GN=G3BP2 PE=1 SV=2;>tr A8K6V7 A8K6V7_HUM       | 5.25E-88  |          |
| Q9UNE7                | CHIP_HUMAN E3 ubiquitin-protein ligase CHIP OS=Homo sapiens GN=STUB1 PE=1 SV=2                                             |           | 97.97    |
| Q9UNE7-2              | CHIP_HUMAN Isoform 2 of E3 ubiquitin-protein ligase CHIP OS=Homo sapiens GN=STUB1                                          |           | 97.97    |
| Q9UNE7;Q9UNE7-2       | CHIP_HUMAN E3 ubiquitin-protein ligase CHIP OS=Homo sapiens GN=STUB1 PE=1 SV=2;>sp Q9UNE7-2 CHIP_HUMAN Isoform 2 of E      | 5.36E-22  |          |
| Q9UNF0                | PACN2_HUMAN Protein kinase C and casein kinase substrate in neurons protein 2 OS=Homo sapiens GN=PACSIN2 PE=1 SV=2         |           | 149.21   |
| Q9UNF0-2              | PACN2_HUMAN Isoform 2 of Protein kinase C and casein kinase substrate in neurons protein 2 OS=Homo sapiens GN=PACSIN2      |           | 149.21   |
| Q9UNF0;Q6FIA3;Q9UNF0- | PACN2_HUMAN Protein kinase C and casein kinase substrate in neurons protein 2 OS=Homo sapiens GN=PACSIN2 PE=1 SV=2;>tr Q6  | 7.93E-50  |          |
| Q9UNF1;C9JMB9;Q9UNF1- | MAGD2_HUMAN Melanoma-associated antigen D2 OS=Homo sapiens GN=MAGED2 PE=1 SV=2;>tr C9JMB9 C9JMB9_HUMAN Unchara             | 2.20E-90  |          |
| Q9UNH7                | SNX6_HUMAN Sorting nexin-6 OS=Homo sapiens GN=SNX6 PE=1 SV=1                                                               |           | 42.14    |
| Q9UNI6                | DUS12_HUMAN Dual specificity protein phosphatase 12 OS=Homo sapiens GN=DUSP12 PE=1 SV=1                                    |           | 60.47    |
| Q9UNK0                | STX8_HUMAN Syntaxin-8 OS=Homo sapiens GN=STX8 PE=1 SV=2                                                                    |           | 193.87   |
| Q9UNL2                | SSRG_HUMAN Translocon-associated protein subunit gamma OS=Homo sapiens GN=SSR3 PE=1 SV=1                                   |           | 84.21    |
| Q9UNM6                | PSD13_HUMAN 26S proteasome non-ATPase regulatory subunit 13 OS=Homo sapiens GN=PSMD13 PE=1 SV=2                            |           | 776.02   |
| Q9UNM6-2              | PSD13_HUMAN Isoform 2 of 26S proteasome non-ATPase regulatory subunit 13 OS=Homo sapiens GN=PSMD13                         |           | 701.01   |
| Q9UNM6-2;Q9UNM6       | 2 PSD13_HUMAN Isoform 2 of 26S proteasome non-ATPase regulatory subunit 13 OS=Homo sapiens GN=PSMD13;>sp Q9UNM6 PSD:       | 3.31E-87  |          |
| Q9UNM6;Q9UNM6-2       | PSD13_HUMAN 26S proteasome non-ATPase regulatory subunit 13 OS=Homo sapiens GN=PSMD13 PE=1 SV=2;>sp Q9UNM6-2 PSD1          | 2.19E-196 |          |
| Q9UNN5;Q9UNN5-2       | FAF1_HUMAN FAS-associated factor 1 OS=Homo sapiens GN=FAF1 PE=1 SV=2;>sp Q9UNN5-2 FAF1_HUMAN Isoform Short of FAS-as       | 1.85E-28  |          |
| Q9UNN8                | EPCR_HUMAN Endothelial protein C receptor OS=Homo sapiens GN=PROCR PE=1 SV=1                                               |           |          |
| Q9UNP9                | PPIE_HUMAN Peptidyl-prolyl cis-trans isomerase E OS=Homo sapiens GN=PPIE PE=1 SV=1                                         |           |          |
| Q9UNP9-2              | PPIE_HUMAN Isoform B of Peptidyl-prolyl cis-trans isomerase E OS=Homo sapiens GN=PPIE                                      |           |          |
| Q9UNP9;Q9UNP9-2       | PPIE_HUMAN Peptidyl-prolyl cis-trans isomerase E OS=Homo sapiens GN=PPIE PE=1 SV=1;>sp Q9UNP9-2 PPIE_HUMAN Isoform B of    | 9.72E-10  |          |
| Q9UNQ2                | DIMT1_HUMAN Probable dimethyladenosine transferase OS=Homo sapiens GN=DIMT1L PE=1 SV=1                                     |           | 27.43    |
| Q9UNS2                | CSN3_HUMAN COP9 signalosome complex subunit 3 OS=Homo sapiens GN=COPS3 PE=1 SV=3                                           |           | 7.43E-13 |
| Q9UNT1                | RBL2B_HUMAN Rab-like protein 2B OS=Homo sapiens GN=RABL2B PE=2 SV=1                                                        |           |          |
| Q9UNT1-3              | RBL2B_HUMAN Isoform 3 of Rab-like protein 2B OS=Homo sapiens GN=RABL2B                                                     |           |          |
| Q9UNU6                | CP8B1_HUMAN 7-alpha-hydroxycholest-4-en-3-one 12-alpha-hydroxylase OS=Homo sapiens GN=CYP8B1 PE=2 SV=2                     |           | 16.74    |
| Q9UNW1                | MINP1_HUMAN Multiple inositol polyphosphate phosphatase 1 OS=Homo sapiens GN=MINPP1 PE=1 SV=1                              |           | 53.51    |
| Q9UNW1-2              | MINP1_HUMAN Isoform 2 of Multiple inositol polyphosphate phosphatase 1 OS=Homo sapiens GN=MINPP1                           |           | 53.51    |
| Q9UNW1-3              | MINP1_HUMAN Isoform 3 of Multiple inositol polyphosphate phosphatase 1 OS=Homo sapiens GN=MINPP1                           |           | 53.51    |
| Q9UNW9                | NOVA2_HUMAN RNA-binding protein Nova-2 OS=Homo sapiens GN=NOVA2 PE=1 SV=1                                                  | 4.84E-14  |          |
| Q9UNX3                | RL26L_HUMAN 60S ribosomal protein L26-like 1 OS=Homo sapiens GN=RPL26L1 PE=1 SV=1                                          |           | 611.98   |
| Q9UNX4                | WDR3_HUMAN WD repeat-containing protein 3 OS=Homo sapiens GN=WDR3 PE=1 SV=1                                                |           |          |
| Q9UNZ2-5;Q53FE8;Q53FF | 5 NSF1C_HUMAN Isoform 3 of NSF1 cofactor p47 OS=Homo sapiens GN=NSFL1C;>tr Q53FE8 Q53FE8_HUMAN cDNA FLJ36526 fis, c        | 9.21E-95  |          |
| Q9UNZ5                | L10K_HUMAN Leydig cell tumor 10 kDa protein homolog OS=Homo sapiens GN=C19orf53 PE=1 SV=1                                  |           | 29.71    |
| Q9UP83-2;A8MUI4;Q9UP8 | 2 COG5_HUMAN Isoform 2 of Conserved oligomeric Golgi complex subunit 5 OS=Homo sapiens GN=COG5;>tr A8MUI4 A8MUI4_HUM       | 5.12E-08  |          |
| Q9UP95;Q9UP95-2;Q9UP9 | S12A4_HUMAN Solute carrier family 12 member 4 OS=Homo sapiens GN=SLC12A4 PE=1 SV=2;>sp Q9UP95-2 S12A4_HUMAN Isofor         | 3.99E-10  |          |
| Q9UPN3                | MACF1_HUMAN Microtubule-actin cross-linking factor 1, isoforms 1/2/3/5 OS=Homo sapiens GN=MACF1 PE=1 SV=4                  |           | 2048.61  |
| Q9UPN3-2              | MACF1_HUMAN Isoform 2 of Microtubule-actin cross-linking factor 1, isoforms 1/2/3/5 OS=Homo sapiens GN=MACF1               |           | 1919.02  |
| Q9UPN3-2;Q9UPN3-3     | 2 MACF1_HUMAN Isoform 2 of Microtubule-actin cross-linking factor 1, isoforms 1/2/3/5 OS=Homo sapiens GN=MACF1;>sp Q9UPN3- | 0         |          |
| Q9UPN3-3              | MACF1_HUMAN Isoform 3 of Microtubule-actin cross-linking factor 1, isoforms 1/2/3/5 OS=Homo sapiens GN=MACF1               |           | 1919.02  |
| Q9UPN3-4              | MACF1_HUMAN Isoform 5 of Microtubule-actin cross-linking factor 1, isoforms 1/2/3/5 OS=Homo sapiens GN=MACF1               |           | 1902.68  |
| Q9UPN3;Q9UPN3-1;Q9UP  | MACF1_HUMAN Microtubule-actin cross-linking factor 1, isoforms 1/2/3/5 OS=Homo sapiens GN=MACF1 PE=1 SV=3;>sp Q9UPN3-1 I   | 3.99E-288 |          |
| Q9UPN4                | AZI1_HUMAN 5-azacytidine-induced protein 1 OS=Homo sapiens GN=AZI1 PE=1 SV=3                                               |           | 45.82    |
| Q9UPN4-2              | AZI1_HUMAN Isoform 2 of 5-azacytidine-induced protein 1 OS=Homo sapiens GN=AZI1                                            |           | 45.82    |
| Q9UPN4-3              | AZI1_HUMAN Isoform 3 of 5-azacytidine-induced protein 1 OS=Homo sapiens GN=AZI1                                            |           | 45.82    |
| Q9UPN6                | SCAF8_HUMAN Protein SCAF8 OS=Homo sapiens GN=SCAF8 PE=1 SV=1                                                               |           | 62.67    |
| Q9UPN7                | PPP6R1_HUMAN Serine/threonine-protein phosphatase 6 regulatory subunit 1 OS=Homo sapiens GN=PPP6R1 PE=1 SV=5               | 2.60E-10  |          |

|                            |                                                                                                                                                                                                                                  |           |          |
|----------------------------|----------------------------------------------------------------------------------------------------------------------------------------------------------------------------------------------------------------------------------|-----------|----------|
| Q9UPN9                     | TRI33_HUMAN E3 ubiquitin-protein ligase TRIM33 OS=Homo sapiens GN=TRIM33 PE=1 SV=3                                                                                                                                               |           | 29.02    |
| Q9UPN9-2                   | TRI33_HUMAN Isoform Beta of E3 ubiquitin-protein ligase TRIM33 OS=Homo sapiens GN=TRIM33                                                                                                                                         |           | 29.02    |
| Q9UPN9;Q9UPN9-2            | TRI33_HUMAN E3 ubiquitin-protein ligase TRIM33 OS=Homo sapiens GN=TRIM33 PE=1 SV=3;>sp Q9UPN9-2 TRI33_HUMAN Isoform                                                                                                              | 1.07E-08  |          |
| Q9UPQ0                     | LIMC1_HUMAN LIM and calponin homology domains-containing protein 1 OS=Homo sapiens GN=LIMCH1 PE=1 SV=4                                                                                                                           |           | 56.1     |
| Q9UPQ0-2                   | LIMC1_HUMAN Isoform 2 of LIM and calponin homology domains-containing protein 1 OS=Homo sapiens GN=LIMCH1                                                                                                                        |           | 56.1     |
| Q9UPQ0-3                   | LIMC1_HUMAN Isoform 3 of LIM and calponin homology domains-containing protein 1 OS=Homo sapiens GN=LIMCH1                                                                                                                        |           | 26.43    |
| Q9UPQ0-4                   | LIMC1_HUMAN Isoform 4 of LIM and calponin homology domains-containing protein 1 OS=Homo sapiens GN=LIMCH1                                                                                                                        |           | 56.1     |
| Q9UPQ0-5                   | LIMC1_HUMAN Isoform 5 of LIM and calponin homology domains-containing protein 1 OS=Homo sapiens GN=LIMCH1                                                                                                                        |           | 22.24    |
| Q9UPQ0-6                   | LIMC1_HUMAN Isoform 6 of LIM and calponin homology domains-containing protein 1 OS=Homo sapiens GN=LIMCH1                                                                                                                        |           | 22.77    |
| Q9UPQ0-6;Q9UPQ0-9;Q9UPQ0-8 | LIMC1_HUMAN Isoform 6 of LIM and calponin homology domains-containing protein 1 OS=Homo sapiens GN=LIMCH1;>sp Q9UPQ0-6 LIMC1_HUMAN Isoform 8 of LIM and calponin homology domains-containing protein 1 OS=Homo sapiens GN=LIMCH1 | 1.48E-59  | 22.24    |
| Q9UPQ0-9                   | LIMC1_HUMAN Isoform 9 of LIM and calponin homology domains-containing protein 1 OS=Homo sapiens GN=LIMCH1                                                                                                                        |           | 22.77    |
| Q9UPQ0;Q9UPQ0-4;Q9UPQ0-8   | LIMC1_HUMAN LIM and calponin homology domains-containing protein 1 OS=Homo sapiens GN=LIMCH1 PE=1 SV=4;>sp Q9UPQ0-4 LIMC1_HUMAN LIM and calponin homology domains-containing protein 1 OS=Homo sapiens GN=LIMCH1 PE=1 SV=4       | 1.35E-100 |          |
| Q9UPQ8                     | DOLK_HUMAN Dolichol kinase OS=Homo sapiens GN=DOLK PE=1 SV=1                                                                                                                                                                     |           |          |
| Q9UPS8                     | ANR26_HUMAN Ankyrin repeat domain-containing protein 26 OS=Homo sapiens GN=ANKRD26 PE=1 SV=3                                                                                                                                     |           |          |
| Q9UPS8-2                   | ANR26_HUMAN Isoform 2 of Ankyrin repeat domain-containing protein 26 OS=Homo sapiens GN=ANKRD26                                                                                                                                  |           |          |
| Q9UPS8-3                   | ANR26_HUMAN Isoform 3 of Ankyrin repeat domain-containing protein 26 OS=Homo sapiens GN=ANKRD26                                                                                                                                  |           |          |
| Q9UPT5                     | EXOC7_HUMAN Exocyst complex component 7 OS=Homo sapiens GN=EXOC7 PE=1 SV=3                                                                                                                                                       |           | 46.97    |
| Q9UPT5-1                   | EXOC7_HUMAN Isoform 1 of Exocyst complex component 7 OS=Homo sapiens GN=EXOC7                                                                                                                                                    |           | 47.82    |
| Q9UPT5-2                   | EXOC7_HUMAN Isoform 2 of Exocyst complex component 7 OS=Homo sapiens GN=EXOC7                                                                                                                                                    |           | 46.97    |
| Q9UPT5-4                   | EXOC7_HUMAN Isoform 4 of Exocyst complex component 7 OS=Homo sapiens GN=EXOC7                                                                                                                                                    |           | 42.57    |
| Q9UPT5-5                   | EXOC7_HUMAN Isoform 5 of Exocyst complex component 7 OS=Homo sapiens GN=EXOC7                                                                                                                                                    |           | 46.97    |
| Q9UPT5-6                   | EXOC7_HUMAN Isoform 6 of Exocyst complex component 7 OS=Homo sapiens GN=EXOC7                                                                                                                                                    |           | 46.97    |
| Q9UPT5;B5MC69;Q9UPT5-6     | EXOC7_HUMAN Exocyst complex component 7 OS=Homo sapiens GN=EXOC7 PE=1 SV=3;>tr B5MC69 B5MC69_HUMAN EXOC7 splice                                                                                                                  | 6.81E-15  |          |
| Q9UPT8                     | ZC3H4_HUMAN Zinc finger CCCH domain-containing protein 4 OS=Homo sapiens GN=ZC3H4 PE=1 SV=3                                                                                                                                      |           | 268.22   |
| Q9UPU5                     | UBP24_HUMAN Ubiquitin carboxyl-terminal hydrolase 24 OS=Homo sapiens GN=USP24 PE=1 SV=3                                                                                                                                          |           | 6.58E-09 |
| Q9UPU9;Q9UPU9-3;Q9UPU9-2   | SMAG1_HUMAN Protein Smaug homolog 1 OS=Homo sapiens GN=SAMD4A PE=1 SV=3;>sp Q9UPU9-3 SMAG1_HUMAN Isoform 3 of                                                                                                                    | 5.34E-16  |          |
| Q9UPW5                     | CBPC1_HUMAN Cytosolic carboxypeptidase 1 OS=Homo sapiens GN=AGTPBP1 PE=1 SV=3                                                                                                                                                    |           |          |
| Q9UPW5-2                   | CBPC1_HUMAN Isoform 2 of Cytosolic carboxypeptidase 1 OS=Homo sapiens GN=AGTPBP1                                                                                                                                                 |           |          |
| Q9UPW5-3                   | CBPC1_HUMAN Isoform 3 of Cytosolic carboxypeptidase 1 OS=Homo sapiens GN=AGTPBP1                                                                                                                                                 |           |          |
| Q9UPW5-3;Q9UPW5;Q9UPW5-2   | CBPC1_HUMAN Isoform 3 of Cytosolic carboxypeptidase 1 OS=Homo sapiens GN=AGTPBP1;>sp Q9UPW5 CBPC1_HUMAN Cytosolic                                                                                                                | 1.55E-10  |          |
| Q9UPX6                     | K1024_HUMAN UPF0258 protein KIAA1024 OS=Homo sapiens GN=KIAA1024 PE=2 SV=3                                                                                                                                                       |           | 2.09E-05 |
| Q9UPX8                     | SHAN2_HUMAN SH3 and multiple ankyrin repeat domains protein 2 OS=Homo sapiens GN=SHANK2 PE=1 SV=3                                                                                                                                |           |          |
| Q9UPX8-3                   | SHAN2_HUMAN Isoform 3 of SH3 and multiple ankyrin repeat domains protein 2 OS=Homo sapiens GN=SHANK2                                                                                                                             |           |          |
| Q9UPX8-3;Q9UPX8;Q9UPX8-2   | SHAN2_HUMAN Isoform 3 of SH3 and multiple ankyrin repeat domains protein 2 OS=Homo sapiens GN=SHANK2;>sp Q9UPX8 SHAN2_HUMAN Isoform 3 of SH3 and multiple ankyrin repeat domains protein 2 OS=Homo sapiens GN=SHANK2             | 1.03E-12  |          |
| Q9UPX8-4                   | SHAN2_HUMAN Isoform 4 of SH3 and multiple ankyrin repeat domains protein 2 OS=Homo sapiens GN=SHANK2                                                                                                                             |           |          |
| Q9UPY8                     | MARE3_HUMAN Microtubule-associated protein RP/EB family member 3 OS=Homo sapiens GN=MAPRE3 PE=1 SV=1                                                                                                                             |           | 26.73    |
| Q9UPY8-2                   | MARE3_HUMAN Isoform 2 of Microtubule-associated protein RP/EB family member 3 OS=Homo sapiens GN=MAPRE3                                                                                                                          |           | 26.73    |
| Q9UPY8;Q9UPY8-2            | MARE3_HUMAN Microtubule-associated protein RP/EB family member 3 OS=Homo sapiens GN=MAPRE3 PE=1 SV=1;>sp Q9UPY8-2 MARE3_HUMAN Isoform 2 of Microtubule-associated protein RP/EB family member 3 OS=Homo sapiens GN=MAPRE3        | 2.49E-11  |          |
| Q9UPZ9                     | ICK_HUMAN Serine/threonine-protein kinase ICK OS=Homo sapiens GN=ICK PE=1 SV=1                                                                                                                                                   |           | 70.37    |
| Q9UPZ9-2                   | ICK_HUMAN Isoform 2 of Serine/threonine-protein kinase ICK OS=Homo sapiens GN=ICK                                                                                                                                                |           | 55.57    |
| Q9UQ07                     | MOK_HUMAN MAPK/MAK/MRK overlapping kinase OS=Homo sapiens GN=RAGE PE=1 SV=1                                                                                                                                                      |           |          |
| Q9UQ07-3                   | MOK_HUMAN Isoform 3 of MAPK/MAK/MRK overlapping kinase OS=Homo sapiens GN=RAGE                                                                                                                                                   |           |          |
| Q9UQ13;Q9UQ13-2            | SHOC2_HUMAN Leucine-rich repeat protein SHOC-2 OS=Homo sapiens GN=SHOC2 PE=1 SV=2;>sp Q9UQ13-2 SHOC2_HUMAN Isoform 2 of Leucine-rich repeat protein SHOC-2 OS=Homo sapiens GN=SHOC2 PE=1 SV=2                                    | 9.35E-08  |          |
| Q9UQ16                     | DYN3_HUMAN Dynamin-3 OS=Homo sapiens GN=DNM3 PE=1 SV=4                                                                                                                                                                           |           | 69.97    |
| Q9UQ16-2                   | DYN3_HUMAN Isoform 2 of Dynamin-3 OS=Homo sapiens GN=DNM3                                                                                                                                                                        |           | 69.97    |
| Q9UQ16-3                   | DYN3_HUMAN Isoform 3 of Dynamin-3 OS=Homo sapiens GN=DNM3                                                                                                                                                                        |           | 69.97    |
| Q9UQ16-4                   | DYN3_HUMAN Isoform 4 of Dynamin-3 OS=Homo sapiens GN=DNM3                                                                                                                                                                        |           | 69.97    |
| Q9UQ16-4;Q9UQ16;Q9UQ16-2   | DYN3_HUMAN Isoform 4 of Dynamin-3 OS=Homo sapiens GN=DNM3;>sp Q9UQ16 DYN3_HUMAN Dynamin-3 OS=Homo sapiens GN=DNM3                                                                                                                | 1.03E-28  |          |
| Q9UQ35                     | SRRM2_HUMAN Serine/arginine repetitive matrix protein 2 OS=Homo sapiens GN=SRRM2 PE=1 SV=2                                                                                                                                       |           | 754.05   |
| Q9UQ35-2                   | SRRM2_HUMAN Isoform 2 of Serine/arginine repetitive matrix protein 2 OS=Homo sapiens GN=SRRM2                                                                                                                                    |           | 329.06   |
| Q9UQ35-3                   | SRRM2_HUMAN Isoform 3 of Serine/arginine repetitive matrix protein 2 OS=Homo sapiens GN=SRRM2                                                                                                                                    |           | 81.8     |
| Q9UQ35;Q9UQ35-2            | SRRM2_HUMAN Serine/arginine repetitive matrix protein 2 OS=Homo sapiens GN=SRRM2 PE=1 SV=2;>sp Q9UQ35-2 SRRM2_HUMAN Isoform 2 of Serine/arginine repetitive matrix protein 2 OS=Homo sapiens GN=SRRM2                            | 2.69E-84  |          |
| Q9UQ80                     | PA2G4_HUMAN Proliferation-associated protein 2G4 OS=Homo sapiens GN=PA2G4 PE=1 SV=3                                                                                                                                              |           | 946.81   |
| Q9UQ88                     | CD11A_HUMAN Cyclin-dependent kinase 11A OS=Homo sapiens GN=CDK11A PE=1 SV=4                                                                                                                                                      |           | 73.21    |
| Q9UQ88-10                  | CD11A_HUMAN Isoform 4 of Cyclin-dependent kinase 11A OS=Homo sapiens GN=CDK11A                                                                                                                                                   |           | 67.41    |
| Q9UQ88-2                   | CD11A_HUMAN Isoform SV1 of Cyclin-dependent kinase 11A OS=Homo sapiens GN=CDK11A                                                                                                                                                 |           | 73.21    |
| Q9UQ88-3                   | CD11A_HUMAN Isoform SV2 of Cyclin-dependent kinase 11A OS=Homo sapiens GN=CDK11A                                                                                                                                                 |           | 73.21    |
| Q9UQ88-4                   | CD11A_HUMAN Isoform SV3 of Cyclin-dependent kinase 11A OS=Homo sapiens GN=CDK11A                                                                                                                                                 |           | 73.21    |
| Q9UQ88-5                   | CD11A_HUMAN Isoform SV7 of Cyclin-dependent kinase 11A OS=Homo sapiens GN=CDK11A                                                                                                                                                 |           | 67.41    |
| Q9UQ88-8                   | CD11A_HUMAN Isoform SV12 of Cyclin-dependent kinase 11A OS=Homo sapiens GN=CDK11A                                                                                                                                                |           |          |

|                        |                                                                                                                            |           |        |
|------------------------|----------------------------------------------------------------------------------------------------------------------------|-----------|--------|
| Q9UQ88-9               | CD11A_HUMAN Isoform SV13 of Cyclin-dependent kinase 11A OS=Homo sapiens GN=CDK11A                                          |           | 27.54  |
| Q9UQB3                 | CTND2_HUMAN Catenin delta-2 OS=Homo sapiens GN=CTNND2 PE=1 SV=3                                                            |           | 39.82  |
| Q9UQB3-2               | CTND2_HUMAN Isoform 2 of Catenin delta-2 OS=Homo sapiens GN=CTNND2                                                         |           | 39.82  |
| Q9UQB8                 | BAIP2_HUMAN Brain-specific angiogenesis inhibitor 1-associated protein 2 OS=Homo sapiens GN=BAIAP2 PE=1 SV=1               |           | 89.54  |
| Q9UQB8-2               | BAIP2_HUMAN Isoform 2 of Brain-specific angiogenesis inhibitor 1-associated protein 2 OS=Homo sapiens GN=BAIAP2            |           | 89.54  |
| Q9UQB8-3               | BAIP2_HUMAN Isoform 3 of Brain-specific angiogenesis inhibitor 1-associated protein 2 OS=Homo sapiens GN=BAIAP2            |           | 89.54  |
| Q9UQB8-4               | BAIP2_HUMAN Isoform 4 of Brain-specific angiogenesis inhibitor 1-associated protein 2 OS=Homo sapiens GN=BAIAP2            |           | 89.54  |
| Q9UQB8-5               | BAIP2_HUMAN Isoform 5 of Brain-specific angiogenesis inhibitor 1-associated protein 2 OS=Homo sapiens GN=BAIAP2            |           | 89.54  |
| Q9UQB8-6               | BAIP2_HUMAN Isoform 6 of Brain-specific angiogenesis inhibitor 1-associated protein 2 OS=Homo sapiens GN=BAIAP2            |           | 89.54  |
| Q9UQB8;Q9UQB8-2;Q9UQB9 | BAIP2_HUMAN Brain-specific angiogenesis inhibitor 1-associated protein 2 OS=Homo sapiens GN=BAIAP2 PE=1 SV=1;>sp Q9UQB8-2  | 8.80E-20  |        |
| Q9UQB9                 | AURKC_HUMAN Serine/threonine-protein kinase 13 OS=Homo sapiens GN=AURKC PE=1 SV=1                                          |           |        |
| Q9UQB9-2               | AURKC_HUMAN Isoform 2 of Serine/threonine-protein kinase 13 OS=Homo sapiens GN=AURKC                                       |           |        |
| Q9UQB9-3               | AURKC_HUMAN Isoform 3 of Serine/threonine-protein kinase 13 OS=Homo sapiens GN=AURKC                                       |           |        |
| Q9UQE7                 | SMC3_HUMAN Structural maintenance of chromosomes protein 3 OS=Homo sapiens GN=SMC3 PE=1 SV=2                               |           | 265.54 |
| Q9UQL6                 | HDAC5_HUMAN Histone deacetylase 5 OS=Homo sapiens GN=HDAC5 PE=1 SV=2                                                       |           |        |
| Q9UQL6-2               | HDAC5_HUMAN Isoform 2 of Histone deacetylase 5 OS=Homo sapiens GN=HDAC5                                                    |           |        |
| Q9UQL6-3               | HDAC5_HUMAN Isoform 3 of Histone deacetylase 5 OS=Homo sapiens GN=HDAC5                                                    |           |        |
| Q9UQM7                 | KCC2A_HUMAN Calcium/calmodulin-dependent protein kinase type II subunit alpha OS=Homo sapiens GN=CAMK2A PE=1 SV=2          |           | 5.71   |
| Q9UQM7-2               | KCC2A_HUMAN Isoform B of Calcium/calmodulin-dependent protein kinase type II subunit alpha OS=Homo sapiens GN=CAMK2A       |           | 5.71   |
| Q9UQN3                 | CHM2B_HUMAN Charged multivesicular body protein 2b OS=Homo sapiens GN=CHMP2B PE=1 SV=1                                     | 9.36E-06  |        |
| Q9UQP3                 | TENN_HUMAN Tenascin-N OS=Homo sapiens GN=TNN PE=1 SV=2                                                                     | 7.78E-225 |        |
| Q9UQR1                 | ZN148_HUMAN Zinc finger protein 148 OS=Homo sapiens GN=ZNF148 PE=1 SV=2                                                    |           |        |
| Q9Y221                 | NIP7_HUMAN 60S ribosome subunit biogenesis protein NIP7 homolog OS=Homo sapiens GN=NIP7 PE=1 SV=1                          |           | 271.08 |
| Q9Y221-2               | NIP7_HUMAN Isoform 2 of 60S ribosome subunit biogenesis protein NIP7 homolog OS=Homo sapiens GN=NIP7                       |           | 237.38 |
| Q9Y221;B3KM49;Q9Y221-2 | NIP7_HUMAN 60S ribosome subunit biogenesis protein NIP7 homolog OS=Homo sapiens GN=NIP7 PE=1 SV=1;>tr B3KM49 B3KM49_       | 1.14E-05  |        |
| Q9Y223-2;Q9Y223;Q9Y224 | 2 GLCNE_HUMAN Isoform 2 of Bifunctional UDP-N-acetylglucosamine 2-epimerase/N-acetylmannosamine kinase OS=Homo sapiens GN= | 2.65E-22  |        |
| Q9Y224                 | CN166_HUMAN UPF0568 protein C14orf166 OS=Homo sapiens GN=C14orf166 PE=1 SV=1                                               |           | 865.48 |
| Q9Y230                 | RUVB2_HUMAN RuvB-like 2 OS=Homo sapiens GN=RUVBL2 PE=1 SV=3                                                                |           | 308.52 |
| Q9Y234                 | LIPT_HUMAN Lipoyltransferase 1, mitochondrial OS=Homo sapiens GN=LIPT1 PE=1 SV=1                                           |           |        |
| Q9Y236                 | OSGI2_HUMAN Oxidative stress-induced growth inhibitor 2 OS=Homo sapiens GN=OSGIN2 PE=2 SV=1                                |           |        |
| Q9Y236-2               | OSGI2_HUMAN Isoform 2 of Oxidative stress-induced growth inhibitor 2 OS=Homo sapiens GN=OSGIN2                             |           |        |
| Q9Y237                 | PIN4_HUMAN Peptidyl-prolyl cis-trans isomerase NIMA-interacting 4 OS=Homo sapiens GN=PIN4 PE=1 SV=1                        |           | 183.07 |
| Q9Y237-2               | PIN4_HUMAN Isoform 2 of Peptidyl-prolyl cis-trans isomerase NIMA-interacting 4 OS=Homo sapiens GN=PIN4                     |           | 184.05 |
| Q9Y237-2;Q9Y237        | 2 PIN4_HUMAN Isoform 2 of Peptidyl-prolyl cis-trans isomerase NIMA-interacting 4 OS=Homo sapiens GN=PIN4;>sp Q9Y237 PIN4_H | 3.90E-86  |        |
| Q9Y241                 | HIG1A_HUMAN HIG1 domain family member 1A OS=Homo sapiens GN=HIGD1A PE=1 SV=1                                               | 2.61E-14  |        |
| Q9Y244                 | POMP_HUMAN Proteasome maturation protein OS=Homo sapiens GN=POMP PE=1 SV=1                                                 | 4.72E-10  |        |
| Q9Y247                 | FAM50B_HUMAN Protein FAM50B OS=Homo sapiens GN=FAM50B PE=2 SV=1                                                            |           |        |
| Q9Y248                 | PSF2_HUMAN DNA replication complex GINS protein PSF2 OS=Homo sapiens GN=GINS2 PE=1 SV=1                                    |           |        |
| Q9Y250                 | LZTS1_HUMAN Leucine zipper putative tumor suppressor 1 OS=Homo sapiens GN=LZTS1 PE=1 SV=3                                  |           | 28.2   |
| Q9Y250-2               | LZTS1_HUMAN Isoform 2 of Leucine zipper putative tumor suppressor 1 OS=Homo sapiens GN=LZTS1                               |           | 28.2   |
| Q9Y250-3               | LZTS1_HUMAN Isoform 3 of Leucine zipper putative tumor suppressor 1 OS=Homo sapiens GN=LZTS1                               |           | 28.2   |
| Q9Y250-4               | LZTS1_HUMAN Isoform 4 of Leucine zipper putative tumor suppressor 1 OS=Homo sapiens GN=LZTS1                               |           | 28.2   |
| Q9Y250-5               | LZTS1_HUMAN Isoform 5 of Leucine zipper putative tumor suppressor 1 OS=Homo sapiens GN=LZTS1                               |           | 25.91  |
| Q9Y250-6               | LZTS1_HUMAN Isoform 6 of Leucine zipper putative tumor suppressor 1 OS=Homo sapiens GN=LZTS1                               |           |        |
| Q9Y250-7               | LZTS1_HUMAN Isoform 7 of Leucine zipper putative tumor suppressor 1 OS=Homo sapiens GN=LZTS1                               |           |        |
| Q9Y262                 | EIF3L_HUMAN Eukaryotic translation initiation factor 3 subunit L OS=Homo sapiens GN=EIF3L PE=1 SV=1                        |           | 635.76 |
| Q9Y263                 | PLAP_HUMAN Phospholipase A-2-activating protein OS=Homo sapiens GN=PLAA PE=1 SV=2                                          |           | 99.47  |
| Q9Y265                 | RUVB1_HUMAN RuvB-like 1 OS=Homo sapiens GN=RUVBL1 PE=1 SV=1                                                                |           | 352.21 |
| Q9Y265-2               | RUVB1_HUMAN Isoform 2 of RuvB-like 1 OS=Homo sapiens GN=RUVBL1                                                             |           | 336.07 |
| Q9Y265;Q9Y265-2        | RUVB1_HUMAN RuvB-like 1 OS=Homo sapiens GN=RUVBL1 PE=1 SV=1;>sp Q9Y265-2 RUVB1_HUMAN Isoform 2 of RuvB-like 1 OS=          | 0         |        |
| Q9Y266                 | NUDC_HUMAN Nuclear migration protein nudC OS=Homo sapiens GN=NUDC PE=1 SV=1                                                |           | 356.84 |
| Q9Y274                 | SIA10_HUMAN Type 2 lactosamine alpha-2,3-sialyltransferase OS=Homo sapiens GN=ST3GAL6 PE=1 SV=1                            |           |        |
| Q9Y276                 | BCS1_HUMAN Mitochondrial chaperone BCS1 OS=Homo sapiens GN=BCS1L PE=1 SV=1                                                 | 1.43E-19  |        |
| Q9Y277                 | VDAC3_HUMAN Voltage-dependent anion-selective channel protein 3 OS=Homo sapiens GN=VDAC3 PE=1 SV=1                         |           | 309.55 |
| Q9Y277-2               | VDAC3_HUMAN Isoform 2 of Voltage-dependent anion-selective channel protein 3 OS=Homo sapiens GN=VDAC3                      |           | 300.1  |
| Q9Y277-2;Q9Y277        | 2 VDAC3_HUMAN Isoform 2 of Voltage-dependent anion-selective channel protein 3 OS=Homo sapiens GN=VDAC3;>sp Q9Y277 VDA     | 3.42E-43  |        |
| Q9Y277;Q9Y277-2        | VDAC3_HUMAN Voltage-dependent anion-selective channel protein 3 OS=Homo sapiens GN=VDAC3 PE=1 SV=1;>sp Q9Y277-2 VDAC       | 6.45E-184 |        |
| Q9Y281                 | COF2_HUMAN Cofilin-2 OS=Homo sapiens GN=CFL2 PE=1 SV=1                                                                     |           | 335.65 |
| Q9Y282-3;Q9Y282;Q9Y283 | 3 ERGI3_HUMAN Isoform 3 of Endoplasmic reticulum-Golgi intermediate compartment protein 3 OS=Homo sapiens GN=ERGIC3;>sp    | 1.38E-05  |        |
| Q9Y283                 | INVS_HUMAN Inversin OS=Homo sapiens GN=INVS PE=1 SV=2                                                                      |           | 46.68  |
| Q9Y283-2               | INVS_HUMAN Isoform 2 of Inversin OS=Homo sapiens GN=INVS                                                                   |           | 46.68  |

|                       |                                                                                                                         |           |          |
|-----------------------|-------------------------------------------------------------------------------------------------------------------------|-----------|----------|
| Q9Y283-3              | INVS_HUMAN Isoform 3 of Inversin OS=Homo sapiens GN=INVS                                                                |           | 9.24     |
| Q9Y285                | SYFA_HUMAN Phenylalanyl-tRNA synthetase alpha chain OS=Homo sapiens GN=FARSA PE=1 SV=3                                  |           | 535.92   |
| Q9Y287                | ITM2B_HUMAN Integral membrane protein 2B OS=Homo sapiens GN=ITM2B PE=1 SV=1                                             |           | 35.59    |
| Q9Y291                | RT33_HUMAN 28S ribosomal protein S33, mitochondrial OS=Homo sapiens GN=MRPS33 PE=1 SV=1                                 |           | 43.07    |
| Q9Y294                | ASF1A_HUMAN Histone chaperone ASF1A OS=Homo sapiens GN=ASF1A PE=1 SV=1                                                  |           | 29.19    |
| Q9Y295                | DRG1_HUMAN Developmentally-regulated GTP-binding protein 1 OS=Homo sapiens GN=DRG1 PE=1 SV=1                            |           | 588.81   |
| Q9Y296;B4DF86;B4DF36; | TPPC4_HUMAN Trafficking protein particle complex subunit 4 OS=Homo sapiens GN=TRAPPC4 PE=1 SV=1;>tr B4DF86 B4DF86_HUM/  | 4.11E-20  |          |
| Q9Y2A7                | NCKP1_HUMAN Nck-associated protein 1 OS=Homo sapiens GN=NCKAP1 PE=1 SV=1                                                |           | 35.04    |
| Q9Y2A7-2              | NCKP1_HUMAN Isoform 2 of Nck-associated protein 1 OS=Homo sapiens GN=NCKAP1                                             |           | 35.04    |
| Q9Y2A7-2;Q9Y2A7       | 2 NCKP1_HUMAN Isoform 2 of Nck-associated protein 1 OS=Homo sapiens GN=NCKAP1;>sp Q9Y2A7 NCKP1_HUMAN Nck-associated     | 8.81E-43  |          |
| Q9Y2B0                | CNPY2_HUMAN Protein canopy homolog 2 OS=Homo sapiens GN=CNPY2 PE=1 SV=1                                                 |           | 440.98   |
| Q9Y2B0-2              | CNPY2_HUMAN Isoform 2 of Protein canopy homolog 2 OS=Homo sapiens GN=CNPY2                                              |           | 96.4     |
| Q9Y2B0;Q9Y2B0-2       | CNPY2_HUMAN Protein canopy homolog 2 OS=Homo sapiens GN=CNPY2 PE=1 SV=1;>sp Q9Y2B0-2 CNPY2_HUMAN Isoform 2 of Proi      | 1.14E-10  |          |
| Q9Y2B2                | PIGL_HUMAN N-acetylglucosaminyl-phosphatidylinositol de-N-acetylase OS=Homo sapiens GN=PIGL PE=2 SV=1                   |           |          |
| Q9Y2C4;Q9Y2C4-4;Q9Y2C | EXOG_HUMAN Nuclease EXOG, mitochondrial OS=Homo sapiens GN=EXOG PE=1 SV=2;>sp Q9Y2C4-4 EXOG_HUMAN Isoform 4 of Ni       | 4.70E-09  |          |
| Q9Y2C9                | TLR6_HUMAN Toll-like receptor 6 OS=Homo sapiens GN=TLR6 PE=2 SV=2                                                       |           |          |
| Q9Y2D4                | EXC6B_HUMAN Exocyst complex component 6B OS=Homo sapiens GN=EXOC6B PE=1 SV=3                                            |           | 89.22    |
| Q9Y2D4-2              | EXC6B_HUMAN Isoform 2 of Exocyst complex component 6B OS=Homo sapiens GN=EXOC6B                                         |           | 65.63    |
| Q9Y2D4;Q9Y2D4-2       | EXC6B_HUMAN Exocyst complex component 6B OS=Homo sapiens GN=EXOC6B PE=1 SV=3;>sp Q9Y2D4-2 EXC6B_HUMAN Isoform 2         | 1.28E-12  |          |
| Q9Y2D5                | AKAP2_HUMAN A-kinase anchor protein 2 OS=Homo sapiens GN=AKAP2 PE=1 SV=3                                                |           | 130.85   |
| Q9Y2D5-4              | AKAP2_HUMAN Isoform 2 of A-kinase anchor protein 2 OS=Homo sapiens GN=AKAP2                                             |           | 138.1    |
| Q9Y2D5-4;Q9Y2D5-6;Q9Y | 4 AKAP2_HUMAN Isoform 2 of A-kinase anchor protein 2 OS=Homo sapiens GN=AKAP2;>sp Q9Y2D5-6 AKAP2_HUMAN Isoform 4 of A   | 1.76E-67  |          |
| Q9Y2D5-5              | AKAP2_HUMAN Isoform 3 of A-kinase anchor protein 2 OS=Homo sapiens GN=AKAP2                                             |           | 130.85   |
| Q9Y2D5-6              | AKAP2_HUMAN Isoform 4 of A-kinase anchor protein 2 OS=Homo sapiens GN=AKAP2                                             |           | 138.1    |
| Q9Y2D5-7              | AKAP2_HUMAN Isoform 5 of A-kinase anchor protein 2 OS=Homo sapiens GN=AKAP2                                             |           | 130.85   |
| Q9Y2G5                | OFUT2_HUMAN GDP-fucose protein O-fucosyltransferase 2 OS=Homo sapiens GN=POFUT2 PE=2 SV=3                               |           | 49.65    |
| Q9Y2G5-1              | OFUT2_HUMAN Isoform A of GDP-fucose protein O-fucosyltransferase 2 OS=Homo sapiens GN=POFUT2                            |           | 49.65    |
| Q9Y2G5-2              | OFUT2_HUMAN Isoform B of GDP-fucose protein O-fucosyltransferase 2 OS=Homo sapiens GN=POFUT2                            |           | 49.65    |
| Q9Y2G5;Q9Y2G5-1;Q9Y2C | OFUT2_HUMAN GDP-fucose protein O-fucosyltransferase 2 OS=Homo sapiens GN=POFUT2 PE=2 SV=3;>sp Q9Y2G5-1 OFUT2_HUMAN      | 4.83E-19  |          |
| Q9Y2H0                | DLGP4_HUMAN Disks large-associated protein 4 OS=Homo sapiens GN=DLGAP4 PE=1 SV=3                                        |           |          |
| Q9Y2H0-1              | DLGP4_HUMAN Isoform 2 of Disks large-associated protein 4 OS=Homo sapiens GN=DLGAP4                                     |           |          |
| Q9Y2H0-3              | DLGP4_HUMAN Isoform 3 of Disks large-associated protein 4 OS=Homo sapiens GN=DLGAP4                                     |           |          |
| Q9Y2H0;E1P5T5;Q9Y2H0- | DLGP4_HUMAN Disks large-associated protein 4 OS=Homo sapiens GN=DLGAP4 PE=1 SV=3;>tr E1P5T5 E1P5T5_HUMAN Discs, large   | 1.07E-19  |          |
| Q9Y2H2                | SAC2_HUMAN Phosphatidylinositide phosphatase SAC2 OS=Homo sapiens GN=INPP5F PE=1 SV=3                                   |           | 8.31E-10 |
| Q9Y2H6                | FND3A_HUMAN Fibronectin type-III domain-containing protein 3A OS=Homo sapiens GN=FNDC3A PE=1 SV=4                       |           |          |
| Q9Y2H6-2              | FND3A_HUMAN Isoform 2 of Fibronectin type-III domain-containing protein 3A OS=Homo sapiens GN=FNDC3A                    |           |          |
| Q9Y2J8                | PADI2_HUMAN Protein-arginine deiminase type-2 OS=Homo sapiens GN=PADI2 PE=1 SV=2                                        |           | 2.00E-80 |
| Q9Y2K3                | MYH15_HUMAN Myosin-15 OS=Homo sapiens GN=MYH15 PE=1 SV=5                                                                |           |          |
| Q9Y2K6                | UBP20_HUMAN Ubiquitin carboxyl-terminal hydrolase 20 OS=Homo sapiens GN=USP20 PE=1 SV=2                                 |           | 26.9     |
| Q9Y2K7                | KDM2A_HUMAN Lysine-specific demethylase 2A OS=Homo sapiens GN=KDM2A PE=1 SV=3                                           |           |          |
| Q9Y2K7-2              | KDM2A_HUMAN Isoform 2 of Lysine-specific demethylase 2A OS=Homo sapiens GN=KDM2A                                        |           |          |
| Q9Y2K7-3              | KDM2A_HUMAN Isoform 3 of Lysine-specific demethylase 2A OS=Homo sapiens GN=KDM2A                                        |           |          |
| Q9Y2L1                | RRP44_HUMAN Exosome complex exonuclease RRP44 OS=Homo sapiens GN=DIS3 PE=1 SV=2                                         |           | 210.18   |
| Q9Y2L1-2              | RRP44_HUMAN Isoform 2 of Exosome complex exonuclease RRP44 OS=Homo sapiens GN=DIS3                                      |           | 162.81   |
| Q9Y2L1;Q9Y2L1-2       | RRP44_HUMAN Exosome complex exonuclease RRP44 OS=Homo sapiens GN=DIS3 PE=1 SV=2;>sp Q9Y2L1-2 RRP44_HUMAN Isoform        | 7.10E-64  |          |
| Q9Y2L5                | TPPC8_HUMAN Trafficking protein particle complex subunit 8 OS=Homo sapiens GN=TRAPPC8 PE=1 SV=2                         |           |          |
| Q9Y2L5-2              | TPPC8_HUMAN Isoform 2 of Trafficking protein particle complex subunit 8 OS=Homo sapiens GN=TRAPPC8                      |           |          |
| Q9Y2M0                | FAN1_HUMAN Fanconi-associated nuclease 1 OS=Homo sapiens GN=FAN1 PE=1 SV=4                                              |           |          |
| Q9Y2M0-2              | FAN1_HUMAN Isoform 2 of Fanconi-associated nuclease 1 OS=Homo sapiens GN=FAN1                                           |           |          |
| Q9Y2N7                | HIF3A_HUMAN Hypoxia-inducible factor 3-alpha OS=Homo sapiens GN=HIF3A PE=1 SV=2                                         |           |          |
| Q9Y2N7-2              | HIF3A_HUMAN Isoform 2 of Hypoxia-inducible factor 3-alpha OS=Homo sapiens GN=HIF3A                                      |           |          |
| Q9Y2N7-3              | HIF3A_HUMAN Isoform 3 of Hypoxia-inducible factor 3-alpha OS=Homo sapiens GN=HIF3A                                      |           |          |
| Q9Y2N7-4              | HIF3A_HUMAN Isoform 4 of Hypoxia-inducible factor 3-alpha OS=Homo sapiens GN=HIF3A                                      |           |          |
| Q9Y2N7-5              | HIF3A_HUMAN Isoform 5 of Hypoxia-inducible factor 3-alpha OS=Homo sapiens GN=HIF3A                                      |           |          |
| Q9Y2P8                | RCL1_HUMAN RNA 3'-terminal phosphate cyclase-like protein OS=Homo sapiens GN=RCL1 PE=1 SV=3                             |           |          |
| Q9Y2Q0                | AT8A1_HUMAN Probable phospholipid-transporting ATPase IA OS=Homo sapiens GN=ATP8A1 PE=1 SV=1                            |           |          |
| Q9Y2Q0-2              | AT8A1_HUMAN Isoform 2 of Probable phospholipid-transporting ATPase IA OS=Homo sapiens GN=ATP8A1                         |           |          |
| Q9Y2Q3                | GSTK1_HUMAN Glutathione S-transferase kappa 1 OS=Homo sapiens GN=GSTK1 PE=1 SV=3                                        |           | 417.02   |
| Q9Y2Q3-2              | GSTK1_HUMAN Isoform 2 of Glutathione S-transferase kappa 1 OS=Homo sapiens GN=GSTK1                                     |           | 336.43   |
| Q9Y2Q3-2;Q6FII1;Q9Y2Q | 2 GSTK1_HUMAN Isoform 2 of Glutathione S-transferase kappa 1 OS=Homo sapiens GN=GSTK1;>tr Q6FII1 Q6FII1_HUMAN Glutathic | 1.48E-157 |          |
| Q9Y2Q3-3              | GSTK1_HUMAN Isoform 3 of Glutathione S-transferase kappa 1 OS=Homo sapiens GN=GSTK1                                     |           | 336.43   |



|                       |                                                                                                                          |            |          |
|-----------------------|--------------------------------------------------------------------------------------------------------------------------|------------|----------|
| Q9Y2Q3-4              | GSTK1_HUMAN Isoform 4 of Glutathione S-transferase kappa 1 OS=Homo sapiens GN=GSTK1                                      |            | 314.61   |
| Q9Y2Q5                | LTOR2_HUMAN Ragulator complex protein LAMTOR2 OS=Homo sapiens GN=LAMTOR2 PE=1 SV=1                                       |            |          |
| Q9Y2Q5-2              | LTOR2_HUMAN Isoform 2 of Ragulator complex protein LAMTOR2 OS=Homo sapiens GN=LAMTOR2                                    |            |          |
| Q9Y2Q5;Q9Y2Q5-2       | LTOR2_HUMAN Ragulator complex protein LAMTOR2 OS=Homo sapiens GN=LAMTOR2 PE=1 SV=1;>sp Q9Y2Q5-2 LTOR2_HUMAN Isof         | 1.26E-17   |          |
| Q9Y2Q5;Q9Y2Q5-2;Q5VY5 | MAP1P_HUMAN Mitogen-activated protein-binding protein-interacting protein OS=Homo sapiens GN=ROBLD3 PE=1 SV=1;>sp Q9Y2Q5 | 4.63E-18   |          |
| Q9Y2Q5;Q9Y2Q5-2;Q9Y2C | LTOR2_HUMAN Ragulator complex protein LAMTOR2 OS=Homo sapiens GN=LAMTOR2 PE=1 SV=1;>sp Q9Y2Q5-2 LTOR2_HUMAN Isof         | 4.40E-16   |          |
| Q9Y2Q9                | RT28_HUMAN 28S ribosomal protein S28, mitochondrial OS=Homo sapiens GN=MRPS28 PE=1 SV=1                                  |            | 128.52   |
| Q9Y2R0                | CCD56_HUMAN Coiled-coil domain-containing protein 56 OS=Homo sapiens GN=CCDC56 PE=1 SV=1                                 |            |          |
| Q9Y2R4                | DDX52_HUMAN Probable ATP-dependent RNA helicase DDX52 OS=Homo sapiens GN=DDX52 PE=1 SV=3                                 |            |          |
| Q9Y2R5                | RT17_HUMAN 28S ribosomal protein S17, mitochondrial OS=Homo sapiens GN=MRPS17 PE=1 SV=1                                  |            | 34.84    |
| Q9Y2R9                | RT07_HUMAN 28S ribosomal protein S7, mitochondrial OS=Homo sapiens GN=MRPS7 PE=1 SV=2                                    |            | 121.49   |
| Q9Y2S0                | RPAC2_HUMAN DNA-directed RNA polymerases I and III subunit RPAC2 OS=Homo sapiens GN=POLR1D PE=1 SV=1                     |            | 75.01    |
| Q9Y2S0-2              | RPAC2_HUMAN Isoform 2 of DNA-directed RNA polymerases I and III subunit RPAC2 OS=Homo sapiens GN=POLR1D                  |            | 37.09    |
| Q9Y2S2;Q9Y2S2-2       | CRYL1_HUMAN Lambda-crystallin homolog OS=Homo sapiens GN=CRYL1 PE=1 SV=3;>sp Q9Y2S2-2 CRYL1_HUMAN Isoform 2 of Lan       | 3.14E-19   |          |
| Q9Y2S6                | CCD72_HUMAN Coiled-coil domain-containing protein 72 OS=Homo sapiens GN=CCDC72 PE=1 SV=1                                 |            | 45.7     |
| Q9Y2S7                | PDIP2_HUMAN Polymerase delta-interacting protein 2 OS=Homo sapiens GN=POLDIP2 PE=1 SV=1                                  |            | 190.99   |
| Q9Y2T2                | AP3M1_HUMAN AP-3 complex subunit mu-1 OS=Homo sapiens GN=AP3M1 PE=1 SV=1                                                 | 1.19E-31   |          |
| Q9Y2T3                | GUAD_HUMAN Guanine deaminase OS=Homo sapiens GN=GDA PE=1 SV=1                                                            | 7.54E-10   |          |
| Q9Y2T7                | YBOX2_HUMAN Y-box-binding protein 2 OS=Homo sapiens GN=YBX2 PE=1 SV=2                                                    |            | 227.84   |
| Q9Y2U8                | MAN1_HUMAN Inner nuclear membrane protein Man1 OS=Homo sapiens GN=LEMD3 PE=1 SV=2                                        | 0.00021367 |          |
| Q9Y2V2                | CHSP1_HUMAN Calcium-regulated heat stable protein 1 OS=Homo sapiens GN=CARHSP1 PE=1 SV=2                                 |            | 65.23    |
| Q9Y2W1                | TR150_HUMAN Thyroid hormone receptor-associated protein 3 OS=Homo sapiens GN=THRAP3 PE=1 SV=2                            |            | 176.69   |
| Q9Y2W2                | WBP11_HUMAN WW domain-binding protein 11 OS=Homo sapiens GN=WBP11 PE=1 SV=1                                              |            |          |
| Q9Y2X3                | NOP58_HUMAN Nucleolar protein 58 OS=Homo sapiens GN=NOP58 PE=1 SV=1                                                      |            | 509.83   |
| Q9Y2X7                | GIT1_HUMAN ARF GTPase-activating protein GIT1 OS=Homo sapiens GN=GIT1 PE=1 SV=2                                          |            | 53.64    |
| Q9Y2X7-3              | GIT1_HUMAN Isoform 3 of ARF GTPase-activating protein GIT1 OS=Homo sapiens GN=GIT1                                       |            | 53.64    |
| Q9Y2X7-3;Q9Y2X7       | 3 GIT1_HUMAN Isoform 3 of ARF GTPase-activating protein GIT1 OS=Homo sapiens GN=GIT1;>sp Q9Y2X7 GIT1_HUMAN ARF GTPase    | 2.20E-18   |          |
| Q9Y2Z0                | SUGT1_HUMAN Suppressor of G2 allele of SKP1 homolog OS=Homo sapiens GN=SUGT1 PE=1 SV=3                                   |            | 25.35    |
| Q9Y2Z0-2              | SUGT1_HUMAN Isoform 2 of Suppressor of G2 allele of SKP1 homolog OS=Homo sapiens GN=SUGT1                                |            | 25.35    |
| Q9Y2Z0;Q9Y2Z0-2       | SUGT1_HUMAN Suppressor of G2 allele of SKP1 homolog OS=Homo sapiens GN=SUGT1 PE=1 SV=3;>sp Q9Y2Z0-2 SUGT1_HUMAN I        | 1.74E-64   |          |
| Q9Y2Z2-6;Q9Y2Z2;Q9Y2Z | 6 MTO1_HUMAN Isoform 7 of Protein MTO1 homolog, mitochondrial OS=Homo sapiens GN=MTO1;>sp Q9Y2Z2 MTO1_HUMAN Protein      | 0.00011339 |          |
| Q9Y2Z2;Q9Y2Z2-4;Q9Y2Z | MTO1_HUMAN Protein MTO1 homolog, mitochondrial OS=Homo sapiens GN=MTO1 PE=1 SV=2;>sp Q9Y2Z2-4 MTO1_HUMAN Isoform         | 6.95E-05   |          |
| Q9Y2Z4                | SYYM_HUMAN Tyrosyl-tRNA synthetase, mitochondrial OS=Homo sapiens GN=YARS2 PE=1 SV=2                                     |            |          |
| Q9Y2Z9                | COQ6_HUMAN Ubiquinone biosynthesis monooxygenase COQ6 OS=Homo sapiens GN=COQ6 PE=1 SV=2                                  |            | 35.87    |
| Q9Y303-3;Q9Y303-2;Q9Y | 3 NAGA_HUMAN Isoform 3 of Putative N-acetylglucosamine-6-phosphate deacetylase OS=Homo sapiens GN=AMDHD2;>sp Q9Y303-2    | 4.46E-11   |          |
| Q9Y305                | ACOT9_HUMAN Acyl-coenzyme A thioesterase 9, mitochondrial OS=Homo sapiens GN=ACOT9 PE=1 SV=2                             |            | 220.33   |
| Q9Y305-2              | ACOT9_HUMAN Isoform 2 of Acyl-coenzyme A thioesterase 9, mitochondrial OS=Homo sapiens GN=ACOT9                          |            | 220.33   |
| Q9Y305-3              | ACOT9_HUMAN Isoform 3 of Acyl-coenzyme A thioesterase 9, mitochondrial OS=Homo sapiens GN=ACOT9                          |            | 220.33   |
| Q9Y305-4              | ACOT9_HUMAN Isoform 4 of Acyl-coenzyme A thioesterase 9, mitochondrial OS=Homo sapiens GN=ACOT9                          |            | 220.33   |
| Q9Y305-4;Q9Y305;Q9Y30 | 4 ACOT9_HUMAN Isoform 4 of Acyl-coenzyme A thioesterase 9, mitochondrial OS=Homo sapiens GN=ACOT9;>sp Q9Y305 ACOT9_HU    | 1.97E-61   |          |
| Q9Y305;Q9Y305-2;Q9Y30 | ACOT9_HUMAN Acyl-coenzyme A thioesterase 9, mitochondrial OS=Homo sapiens GN=ACOT9 PE=1 SV=2;>sp Q9Y305-2 ACOT9_HUI      | 1.17E-55   |          |
| Q9Y312                | CT004_HUMAN Uncharacterized protein C20orf4 OS=Homo sapiens GN=C20orf4 PE=1 SV=2                                         |            | 9.12E-10 |
| Q9Y314                | NOSIP_HUMAN Nitric oxide synthase-interacting protein OS=Homo sapiens GN=NOSIP PE=1 SV=1                                 |            | 30.07    |
| Q9Y315                | DEOC_HUMAN Putative deoxyribose-phosphate aldolase OS=Homo sapiens GN=DERA PE=1 SV=2                                     |            | 7.74E-11 |
| Q9Y316;Q9Y316-2       | MEMO1_HUMAN Protein MEMO1 OS=Homo sapiens GN=MEMO1 PE=1 SV=1;>sp Q9Y316-2 MEMO1_HUMAN Isoform 2 of Protein MEM           | 3.51E-11   |          |
| Q9Y320                | TMX2_HUMAN Thioredoxin-related transmembrane protein 2 OS=Homo sapiens GN=TMX2 PE=1 SV=1                                 |            | 40.92    |
| Q9Y320-2              | TMX2_HUMAN Isoform 2 of Thioredoxin-related transmembrane protein 2 OS=Homo sapiens GN=TMX2                              |            | 37.04    |
| Q9Y330                | ZBT12_HUMAN Zinc finger and BTB domain-containing protein 12 OS=Homo sapiens GN=ZBTB12 PE=1 SV=1                         |            |          |
| Q9Y333                | LSM2_HUMAN U6 snRNA-associated Sm-like protein LSm2 OS=Homo sapiens GN=LSM2 PE=1 SV=1                                    |            | 365.95   |
| Q9Y343                | SNX24_HUMAN Sorting nexin-24 OS=Homo sapiens GN=SNX24 PE=1 SV=1                                                          |            | 20.89    |
| Q9Y343-2              | SNX24_HUMAN Isoform 2 of Sorting nexin-24 OS=Homo sapiens GN=SNX24                                                       |            | 20.89    |
| Q9Y365                | PCTL_HUMAN PCTP-like protein OS=Homo sapiens GN=STARD10 PE=2 SV=2                                                        |            | 4.62E-51 |
| Q9Y371-2;Q9Y371       | 2 SHLB1_HUMAN Isoform 2 of Endophilin-B1 OS=Homo sapiens GN=SH3GLB1;>sp Q9Y371 SHLB1_HUMAN Endophilin-B1 OS=Homo         | 2.30E-18   |          |
| Q9Y376                | CAB39_HUMAN Calcium-binding protein 39 OS=Homo sapiens GN=CAB39 PE=1 SV=1                                                |            | 86.99    |
| Q9Y383                | LC7L2_HUMAN Putative RNA-binding protein Luc7-like 2 OS=Homo sapiens GN=LUC7L2 PE=1 SV=2                                 |            | 343.35   |
| Q9Y383-2              | LC7L2_HUMAN Isoform 2 of Putative RNA-binding protein Luc7-like 2 OS=Homo sapiens GN=LUC7L2                              |            | 253.33   |
| Q9Y383;Q9Y383-2       | LC7L2_HUMAN Putative RNA-binding protein Luc7-like 2 OS=Homo sapiens GN=LUC7L2 PE=1 SV=2;>sp Q9Y383-2 LC7L2_HUMAN Isi    | 5.45E-220  |          |
| Q9Y388                | RBMX2_HUMAN RNA-binding motif protein, X-linked 2 OS=Homo sapiens GN=RBMX2 PE=1 SV=2                                     |            | 6.32E-07 |
| Q9Y394                | DHRS7_HUMAN Dehydrogenase/reductase SDR family member 7 OS=Homo sapiens GN=DHRS7 PE=1 SV=1                               |            |          |
| Q9Y394-2              | DHRS7_HUMAN Isoform 2 of Dehydrogenase/reductase SDR family member 7 OS=Homo sapiens GN=DHRS7                            |            |          |
| Q9Y394;Q9Y394-2       | DHRS7_HUMAN Dehydrogenase/reductase SDR family member 7 OS=Homo sapiens GN=DHRS7 PE=1 SV=1;>sp Q9Y394-2 DHRS7_f          | 1.06E-09   |          |

|                        |                                                                                                                        |          |        |
|------------------------|------------------------------------------------------------------------------------------------------------------------|----------|--------|
| Q9Y399                 | RT02_HUMAN 28S ribosomal protein S2, mitochondrial OS=Homo sapiens GN=MRPS2 PE=1 SV=1                                  |          | 125.22 |
| Q9Y3A3;B4DML0;A8K012;  | MOBL3_HUMAN Mps one binder kinase activator-like 3 OS=Homo sapiens GN=MOBKL3 PE=1 SV=1;>tr B4DML0 B4DML0_HUMAN Pre     | 6.99E-17 |        |
| Q9Y3A4                 | RRP7A_HUMAN Ribosomal RNA-processing protein 7 homolog A OS=Homo sapiens GN=RRP7A PE=1 SV=2                            |          |        |
| Q9Y3A5                 | SBDS_HUMAN Ribosome maturation protein SBDS OS=Homo sapiens GN=SBDS PE=1 SV=4                                          |          | 218.49 |
| Q9Y3A6                 | TMED5_HUMAN Transmembrane emp24 domain-containing protein 5 OS=Homo sapiens GN=TMED5 PE=1 SV=1                         |          | 118.31 |
| Q9Y3B2                 | EXOS1_HUMAN Exosome complex component CSL4 OS=Homo sapiens GN=EXOSC1 PE=1 SV=1                                         |          | 193.63 |
| Q9Y3B2;B1AMU4;B1AMU3   | EXOS1_HUMAN 3-5 exoribonuclease CSL4 homolog OS=Homo sapiens GN=EXOSC1 PE=1 SV=1;>tr B1AMU4 B1AMU4_HUMAN Exoso         | 2.92E-24 |        |
| Q9Y3B3                 | TMED7_HUMAN Transmembrane emp24 domain-containing protein 7 OS=Homo sapiens GN=TMED7 PE=1 SV=2                         |          | 204.62 |
| Q9Y3B4                 | PM14_HUMAN Pre branch site protein p14 OS=Homo sapiens GN=SF3B14 PE=1 SV=1                                             |          | 293.33 |
| Q9Y3B7                 | RM11_HUMAN 39S ribosomal protein L11, mitochondrial OS=Homo sapiens GN=MRPL11 PE=1 SV=1                                |          | 425.82 |
| Q9Y3B7-2               | RM11_HUMAN Isoform 2 of 39S ribosomal protein L11, mitochondrial OS=Homo sapiens GN=MRPL11                             |          | 333.03 |
| Q9Y3B7;Q9Y3B7-2        | RM11_HUMAN 39S ribosomal protein L11, mitochondrial OS=Homo sapiens GN=MRPL11 PE=1 SV=1;>sp Q9Y3B7-2 RM11_HUMAN Is     | 5.59E-57 |        |
| Q9Y3B8                 | ORN_HUMAN Oligoribonuclease, mitochondrial OS=Homo sapiens GN=REXO2 PE=1 SV=3                                          |          | 184.84 |
| Q9Y3B8-2               | ORN_HUMAN Isoform 2 of Oligoribonuclease, mitochondrial OS=Homo sapiens GN=REXO2                                       |          | 146.78 |
| Q9Y3B8;Q9Y3B8-2        | ORN_HUMAN Oligoribonuclease, mitochondrial OS=Homo sapiens GN=REXO2 PE=1 SV=3;>sp Q9Y3B8-2 ORN_HUMAN Isoform 2 of C    | 2.22E-42 |        |
| Q9Y3B9                 | RRP15_HUMAN RRP15-like protein OS=Homo sapiens GN=RRP15 PE=1 SV=2                                                      |          |        |
| Q9Y3C0                 | CCD53_HUMAN WASH complex subunit CCDC53 OS=Homo sapiens GN=CCDC53 PE=1 SV=1                                            | 1.79E-18 |        |
| Q9Y3C1                 | NOP16_HUMAN Nucleolar protein 16 OS=Homo sapiens GN=NOP16 PE=1 SV=2                                                    |          | 195.02 |
| Q9Y3C4                 | TPRKB_HUMAN TP53RK-binding protein OS=Homo sapiens GN=TPRKB PE=1 SV=1                                                  |          | 94.83  |
| Q9Y3C4-2               | TPRKB_HUMAN Isoform 2 of TP53RK-binding protein OS=Homo sapiens GN=TPRKB                                               |          | 90.29  |
| Q9Y3C4-3               | TPRKB_HUMAN Isoform 3 of TP53RK-binding protein OS=Homo sapiens GN=TPRKB                                               |          | 94.83  |
| Q9Y3C4;Q9Y3C4-3        | TPRKB_HUMAN TP53RK-binding protein OS=Homo sapiens GN=TPRKB PE=1 SV=1;>sp Q9Y3C4-3 TPRKB_HUMAN Isoform 3 of TP53R      | 4.25E-20 |        |
| Q9Y3C6                 | PPIL1_HUMAN Peptidyl-prolyl cis-trans isomerase-like 1 OS=Homo sapiens GN=PPIL1 PE=1 SV=1                              |          | 212.79 |
| Q9Y3C7                 | MED31_HUMAN Mediator of RNA polymerase II transcription subunit 31 OS=Homo sapiens GN=MED31 PE=1 SV=1                  |          |        |
| Q9Y3C8                 | UFC1_HUMAN Ubiquitin-fold modifier-conjugating enzyme 1 OS=Homo sapiens GN=UFC1 PE=1 SV=3                              |          | 16.67  |
| Q9Y3D0                 | MIP18_HUMAN Mitotic spindle-associated MMXD complex subunit MIP18 OS=Homo sapiens GN=FAM96B PE=1 SV=1                  | 5.74E-06 |        |
| Q9Y3D2                 | MSRB2_HUMAN Methionine-R-sulfoxide reductase B2, mitochondrial OS=Homo sapiens GN=MSRB2 PE=2 SV=2                      |          |        |
| Q9Y3D3                 | RT16_HUMAN 28S ribosomal protein S16, mitochondrial OS=Homo sapiens GN=MRPS16 PE=1 SV=1                                |          | 65.69  |
| Q9Y3D6                 | FIS1_HUMAN Mitochondrial fission 1 protein OS=Homo sapiens GN=FIS1 PE=1 SV=2                                           |          | 35.56  |
| Q9Y3D7                 | TIM16_HUMAN Mitochondrial import inner membrane translocase subunit TIM16 OS=Homo sapiens GN=PAM16 PE=1 SV=2           |          | 63.39  |
| Q9Y3D8                 | KAD6_HUMAN Adenylate kinase isoenzyme 6 OS=Homo sapiens GN=TAF9 PE=1 SV=1                                              | 1.76E-07 |        |
| Q9Y3D9                 | RT23_HUMAN 28S ribosomal protein S23, mitochondrial OS=Homo sapiens GN=MRPS23 PE=1 SV=2                                |          | 198.57 |
| Q9Y3E0                 | GOT1B_HUMAN Vesicle transport protein GOT1B OS=Homo sapiens GN=GOLT1B PE=1 SV=1                                        |          | 63.12  |
| Q9Y3E1                 | HDGR3_HUMAN Hepatoma-derived growth factor-related protein 3 OS=Homo sapiens GN=HDGFRP3 PE=1 SV=1                      |          |        |
| Q9Y3E5                 | PTH2_HUMAN Peptidyl-tRNA hydrolase 2, mitochondrial OS=Homo sapiens GN=PTRH2 PE=1 SV=1                                 |          | 331.17 |
| Q9Y3E7;Q9Y3E7-2        | CHMP3_HUMAN Charged multivesicular body protein 3 OS=Homo sapiens GN=VPS24 PE=1 SV=3;>sp Q9Y3E7-2 CHMP3_HUMAN Is of    | 6.75E-08 |        |
| Q9Y3F4                 | STRAP_HUMAN Serine-threonine kinase receptor-associated protein OS=Homo sapiens GN=STRAP PE=1 SV=1                     |          | 170.63 |
| Q9Y3I0                 | RTCB_HUMAN tRNA-splicing ligase RtcB homolog OS=Homo sapiens GN=C22orf28 PE=1 SV=1                                     |          | 520.94 |
| Q9Y3I0;B4DNA0          | CV028_HUMAN UPF0027 protein C22orf28 OS=Homo sapiens GN=C22orf28 PE=1 SV=1;>tr B4DNA0 B4DNA0_HUMAN cDNA FLJ5802        | 2.51E-66 |        |
| Q9Y3L3                 | 3BP1_HUMAN SH3 domain-binding protein 1 OS=Homo sapiens GN=SH3BP1 PE=1 SV=3                                            |          |        |
| Q9Y3L3-2               | 3BP1_HUMAN Isoform 2 of SH3 domain-binding protein 1 OS=Homo sapiens GN=SH3BP1                                         |          |        |
| Q9Y3L3;B7Z6Y3;Q9Y3L3-2 | 3BP1_HUMAN SH3 domain-binding protein 1 OS=Homo sapiens GN=SH3BP1 PE=1 SV=3;>tr B7Z6Y3 B7Z6Y3_HUMAN cDNA FLJ6163       | 1.18E-15 |        |
| Q9Y3L5                 | RAP2C_HUMAN Ras-related protein Rap-2c OS=Homo sapiens GN=RAP2C PE=1 SV=1                                              |          | 196.89 |
| Q9Y3P9;Q9Y3P9-2        | RBGP1_HUMAN Rab GTPase-activating protein 1 OS=Homo sapiens GN=RABGAP1 PE=1 SV=3;>sp Q9Y3P9-2 RBGP1_HUMAN Isoform      | 4.79E-48 |        |
| Q9Y3Q3                 | TMED3_HUMAN Transmembrane emp24 domain-containing protein 3 OS=Homo sapiens GN=TMED3 PE=2 SV=1                         |          |        |
| Q9Y3R4                 | NEUR2_HUMAN Sialidase-2 OS=Homo sapiens GN=NEU2 PE=1 SV=2                                                              |          |        |
| Q9Y3R5                 | DOP2_HUMAN Protein dopey-2 OS=Homo sapiens GN=DOPEY2 PE=1 SV=5                                                         |          |        |
| Q9Y3R5-2               | DOP2_HUMAN Isoform 2 of Protein dopey-2 OS=Homo sapiens GN=DOPEY2                                                      |          |        |
| Q9Y3R5;Q9Y3R5-2        | DOP2_HUMAN Protein dopey-2 OS=Homo sapiens GN=DOPEY2 PE=1 SV=5;>sp Q9Y3R5-2 DOP2_HUMAN Isoform 2 of Protein dopey-     | 1.47E-06 |        |
| Q9Y3S1-3               | WNK2_HUMAN Isoform 3 of Serine/threonine-protein kinase WNK2 OS=Homo sapiens GN=WNK2                                   |          |        |
| Q9Y3T9                 | NOC2L_HUMAN Nucleolar complex protein 2 homolog OS=Homo sapiens GN=NOC2L PE=1 SV=4                                     |          |        |
| Q9Y3U8                 | RL36_HUMAN 60S ribosomal protein L36 OS=Homo sapiens GN=RPL36 PE=1 SV=3                                                |          | 362.34 |
| Q9Y3V2                 | RWDD3_HUMAN RWD domain-containing protein 3 OS=Homo sapiens GN=RWDD3 PE=1 SV=4                                         |          | 20.85  |
| Q9Y3Y2                 | CHTOP_HUMAN Chromatin target of PRMT1 protein OS=Homo sapiens GN=CHTOP PE=1 SV=2                                       |          | 89.55  |
| Q9Y3Y2-3               | CHTOP_HUMAN Isoform 2 of Chromatin target of PRMT1 protein OS=Homo sapiens GN=CHTOP                                    |          | 89.55  |
| Q9Y3Y2-3;Q9Y3Y2;Q9Y3Y3 | 3 FOP_HUMAN Isoform 2 of Friend of PRMT1 protein OS=Homo sapiens GN=C1orf77;>sp Q9Y3Y2 FOP_HUMAN Friend of PRMT1 prote | 6.84E-31 |        |
| Q9Y3Y2-4               | CHTOP_HUMAN Isoform 3 of Chromatin target of PRMT1 protein OS=Homo sapiens GN=CHTOP                                    |          | 84.55  |
| Q9Y3Z3                 | SAMH1_HUMAN SAM domain and HD domain-containing protein 1 OS=Homo sapiens GN=SAMHD1 PE=1 SV=2                          |          | 197.72 |
| Q9Y3Z3-2               | SAMH1_HUMAN Isoform 2 of SAM domain and HD domain-containing protein 1 OS=Homo sapiens GN=SAMHD1                       |          | 197.72 |
| Q9Y3Z3;Q9Y3Z3-2        | SAMH1_HUMAN SAM domain and HD domain-containing protein 1 OS=Homo sapiens GN=SAMHD1 PE=1 SV=2;>sp Q9Y3Z3-2 SAMH1       | 4.87E-13 |        |
| Q9Y426                 | CU025_HUMAN C2 domain-containing protein 2 OS=Homo sapiens GN=C2CD2 PE=1 SV=2                                          |          |        |

|                        |                                                                                                                          |          |         |
|------------------------|--------------------------------------------------------------------------------------------------------------------------|----------|---------|
| Q9Y426-2               | CU025_HUMAN Isoform 2 of C2 domain-containing protein 2 OS=Homo sapiens GN=C2CD2                                         |          |         |
| Q9Y426-3               | CU025_HUMAN Isoform 3 of C2 domain-containing protein 2 OS=Homo sapiens GN=C2CD2                                         |          |         |
| Q9Y446                 | PKP3_HUMAN Plakophilin-3 OS=Homo sapiens GN=PKP3 PE=1 SV=1                                                               |          |         |
| Q9Y448;C9J424;B4DP18   | T4AF1_HUMAN Putative TRAF4-associated factor 1 OS=Homo sapiens GN=TRAF4AF1 PE=1 SV=2;>tr C9J424 C9J424_HUMAN Unchar      | 1.17E-17 |         |
| Q9Y450;Q9Y450-4        | HBS1L_HUMAN HBS1-like protein OS=Homo sapiens GN=HBS1L PE=1 SV=1;>sp Q9Y450-4 HBS1L_HUMAN Isoform 3 of HBS1-like pr      | 1.00E-08 |         |
| Q9Y490                 | TLN1_HUMAN Talin-1 OS=Homo sapiens GN=TLN1 PE=1 SV=3                                                                     |          | 2053.67 |
| Q9Y4A5                 | TRRAP_HUMAN Transformation/transcription domain-associated protein OS=Homo sapiens GN=TRRAP PE=1 SV=3                    |          | 140.85  |
| Q9Y4A5-2               | TRRAP_HUMAN Isoform 2 of Transformation/transcription domain-associated protein OS=Homo sapiens GN=TRRAP                 |          | 140.85  |
| Q9Y4A5;Q9Y4A5-2        | TRRAP_HUMAN Transformation/transcription domain-associated protein OS=Homo sapiens GN=TRRAP PE=1 SV=3;>sp Q9Y4A5-2 TRF   | 1.32E-12 |         |
| Q9Y4B5                 | CC165_HUMAN Coiled-coil domain-containing protein 165 OS=Homo sapiens GN=CCDC165 PE=1 SV=4                               |          | 111.67  |
| Q9Y4B5-2               | CC165_HUMAN Isoform 2 of Coiled-coil domain-containing protein 165 OS=Homo sapiens GN=CCDC165                            |          | 107.42  |
| Q9Y4B5-3               | CC165_HUMAN Isoform 3 of Coiled-coil domain-containing protein 165 OS=Homo sapiens GN=CCDC165                            |          | 107.42  |
| Q9Y4B5-4               | CC165_HUMAN Isoform 4 of Coiled-coil domain-containing protein 165 OS=Homo sapiens GN=CCDC165                            |          | 29.41   |
| Q9Y4B5;Q9Y4B5-3;Q9Y4B  | CC165_HUMAN Coiled-coil domain-containing protein 165 OS=Homo sapiens GN=CCDC165 PE=1 SV=4;>sp Q9Y4B5-3 CC165_HUMA       | 2.78E-05 |         |
| Q9Y4C0                 | NRX3A_HUMAN Neurexin-3-alpha OS=Homo sapiens GN=NRXN3 PE=2 SV=4                                                          |          |         |
| Q9Y4C0-3               | NRX3A_HUMAN Isoform 3 of Neurexin-3-alpha OS=Homo sapiens GN=NRXN3                                                       |          |         |
| Q9Y4C1                 | KDM3A_HUMAN Lysine-specific demethylase 3A OS=Homo sapiens GN=KDM3A PE=1 SV=4                                            |          | 6.66    |
| Q9Y4C2;Q9Y4C2-2        | F115A_HUMAN Protein FAM115A OS=Homo sapiens GN=FAM115A PE=1 SV=3;>sp Q9Y4C2-2 F115A_HUMAN Isoform 2 of Protein FAI       | 6.83E-12 |         |
| Q9Y4C8                 | RBM19_HUMAN Probable RNA-binding protein 19 OS=Homo sapiens GN=RBM19 PE=1 SV=3                                           |          |         |
| Q9Y4D7                 | PLXD1_HUMAN Plexin-D1 OS=Homo sapiens GN=PLXND1 PE=1 SV=3                                                                |          | 43.21   |
| Q9Y4D7-2               | PLXD1_HUMAN Isoform 2 of Plexin-D1 OS=Homo sapiens GN=PLXND1                                                             |          | 18.79   |
| Q9Y4D8                 | K0614_HUMAN Probable E3 ubiquitin-protein ligase C12orf51 OS=Homo sapiens GN=C12orf51 PE=1 SV=5                          |          |         |
| Q9Y4D8-2               | K0614_HUMAN Isoform 2 of Probable E3 ubiquitin-protein ligase C12orf51 OS=Homo sapiens GN=C12orf51                       |          |         |
| Q9Y4D8-4               | K0614_HUMAN Isoform 4 of Probable E3 ubiquitin-protein ligase C12orf51 OS=Homo sapiens GN=C12orf51                       |          |         |
| Q9Y4E1                 | FA21C_HUMAN WASH complex subunit FAM21C OS=Homo sapiens GN=FAM21C PE=1 SV=3                                              |          | 35.35   |
| Q9Y4E1-2               | FA21C_HUMAN Isoform 2 of WASH complex subunit FAM21C OS=Homo sapiens GN=FAM21C                                           |          | 35.35   |
| Q9Y4E1-3               | FA21C_HUMAN Isoform 3 of WASH complex subunit FAM21C OS=Homo sapiens GN=FAM21C                                           |          | 35.35   |
| Q9Y4E1-4               | FA21C_HUMAN Isoform 4 of WASH complex subunit FAM21C OS=Homo sapiens GN=FAM21C                                           |          | 35.35   |
| Q9Y4E8;Q9Y4E8-3;Q9Y4E  | UBP15_HUMAN Ubiquitin carboxyl-terminal hydrolase 15 OS=Homo sapiens GN=USP15 PE=1 SV=3;>sp Q9Y4E8-3 UBP15_HUMAN Iso     | 2.46E-13 |         |
| Q9Y4F1-2;Q9Y4F1        | 2 FARP1_HUMAN Isoform 2 of FERM, RhoGEF and pleckstrin domain-containing protein 1 OS=Homo sapiens GN=FARP1;>sp Q9Y4F1 F | 5.73E-06 |         |
| Q9Y4F3                 | LKAP_HUMAN Limkain-b1 OS=Homo sapiens GN=LKAP PE=1 SV=5                                                                  |          |         |
| Q9Y4F3-3               | LKAP_HUMAN Isoform 2 of Limkain-b1 OS=Homo sapiens GN=LKAP                                                               |          |         |
| Q9Y4F3-4               | LKAP_HUMAN Isoform 3 of Limkain-b1 OS=Homo sapiens GN=LKAP                                                               |          |         |
| Q9Y4F3-5               | LKAP_HUMAN Isoform 4 of Limkain-b1 OS=Homo sapiens GN=LKAP                                                               |          |         |
| Q9Y4F3-6               | LKAP_HUMAN Isoform 5 of Limkain-b1 OS=Homo sapiens GN=LKAP                                                               |          |         |
| Q9Y4G6                 | TLN2_HUMAN Talin-2 OS=Homo sapiens GN=TLN2 PE=1 SV=4                                                                     |          | 204.22  |
| Q9Y4I1                 | MYO5A_HUMAN Myosin-Va OS=Homo sapiens GN=MYO5A PE=1 SV=2                                                                 |          |         |
| Q9Y4I1-2               | MYO5A_HUMAN Isoform 2 of Myosin-Va OS=Homo sapiens GN=MYO5A                                                              |          |         |
| Q9Y4I1-3               | MYO5A_HUMAN Isoform 3 of Myosin-Va OS=Homo sapiens GN=MYO5A                                                              |          |         |
| Q9Y4I1-3;Q9Y4I1;A8CDT5 | 3 MYO5A_HUMAN Isoform 3 of Myosin-Va OS=Homo sapiens GN=MYO5A;>sp Q9Y4I1 MYO5A_HUMAN Myosin-Va OS=Homo sapiens C         | 3.47E-07 |         |
| Q9Y4J8                 | DTNA_HUMAN Dystrobrevin alpha OS=Homo sapiens GN=DTNA PE=1 SV=2                                                          |          |         |
| Q9Y4J8-2               | DTNA_HUMAN Isoform 2 of Dystrobrevin alpha OS=Homo sapiens GN=DTNA                                                       |          |         |
| Q9Y4J8-3               | DTNA_HUMAN Isoform 3 of Dystrobrevin alpha OS=Homo sapiens GN=DTNA                                                       |          |         |
| Q9Y4J8-4               | DTNA_HUMAN Isoform 4 of Dystrobrevin alpha OS=Homo sapiens GN=DTNA                                                       |          |         |
| Q9Y4J8-5               | DTNA_HUMAN Isoform 5 of Dystrobrevin alpha OS=Homo sapiens GN=DTNA                                                       |          |         |
| Q9Y4J8-7               | DTNA_HUMAN Isoform 7 of Dystrobrevin alpha OS=Homo sapiens GN=DTNA                                                       |          |         |
| Q9Y4K1                 | AIM1_HUMAN Absent in melanoma 1 protein OS=Homo sapiens GN=AIM1 PE=1 SV=3                                                | 3.21E-05 |         |
| Q9Y4L1                 | HYOU1_HUMAN Hypoxia up-regulated protein 1 OS=Homo sapiens GN=HYOU1 PE=1 SV=1                                            |          | 2162.51 |
| Q9Y4P3                 | TBL2_HUMAN Transducin beta-like protein 2 OS=Homo sapiens GN=TBL2 PE=1 SV=1                                              |          | 79.84   |
| Q9Y4P9                 | SPEF1_HUMAN Sperm flagellar protein 1 OS=Homo sapiens GN=SPEF1 PE=1 SV=3                                                 |          |         |
| Q9Y4P9-2               | SPEF1_HUMAN Isoform 2 of Sperm flagellar protein 1 OS=Homo sapiens GN=SPEF1                                              |          |         |
| Q9Y4W2                 | LAS1L_HUMAN Protein LAS1 homolog OS=Homo sapiens GN=LAS1L PE=1 SV=2                                                      |          |         |
| Q9Y4W2-2               | LAS1L_HUMAN Isoform 2 of Protein LAS1 homolog OS=Homo sapiens GN=LAS1L                                                   |          |         |
| Q9Y4W2-3               | LAS1L_HUMAN Isoform 3 of Protein LAS1 homolog OS=Homo sapiens GN=LAS1L                                                   |          |         |
| Q9Y4W2-4               | LAS1L_HUMAN Isoform 4 of Protein LAS1 homolog OS=Homo sapiens GN=LAS1L                                                   |          |         |
| Q9Y4W2;Q9Y4W2-2;Q9Y4   | LAS1L_HUMAN Protein LAS1 homolog OS=Homo sapiens GN=LAS1L PE=1 SV=2;>sp Q9Y4W2-2 LAS1L_HUMAN Isoform 2 of Protein I      | 1.47E-09 |         |
| Q9Y4W6                 | AFG32_HUMAN AFG3-like protein 2 OS=Homo sapiens GN=AFG3L2 PE=1 SV=2                                                      |          |         |
| Q9Y4X5;Q59FM8          | ARI1_HUMAN Protein ariadne-1 homolog OS=Homo sapiens GN=ARIH1 PE=1 SV=2;>tr Q59FM8 Q59FM8_HUMAN Ariadne-1 protein f      | 2.87E-05 |         |
| Q9Y4Y9                 | LSM5_HUMAN U6 snRNA-associated Sm-like protein LSm5 OS=Homo sapiens GN=LSM5 PE=1 SV=3                                    | 6.50E-09 |         |
| Q9Y4Z0                 | LSM4_HUMAN U6 snRNA-associated Sm-like protein LSm4 OS=Homo sapiens GN=LSM4 PE=1 SV=1                                    |          | 386.66  |
| Q9Y508;Q9Y508-2        | RN114_HUMAN RING finger protein 114 OS=Homo sapiens GN=RN114 PE=1 SV=1;>sp Q9Y508-2 RN114_HUMAN Isoform 2 of RINC        | 5.01E-09 |         |

|                       |                                                                                                                        |           |        |
|-----------------------|------------------------------------------------------------------------------------------------------------------------|-----------|--------|
| Q9Y512                | SAM50_HUMAN Sorting and assembly machinery component 50 homolog OS=Homo sapiens GN=SAMM50 PE=1 SV=3                    | 4.66E-49  |        |
| Q9Y520                | PRC2C_HUMAN Protein PRRC2C OS=Homo sapiens GN=PRRC2C PE=1 SV=4                                                         |           | 761.45 |
| Q9Y520-2              | PRC2C_HUMAN Isoform 2 of Protein PRRC2C OS=Homo sapiens GN=PRRC2C                                                      |           | 686.32 |
| Q9Y520-3              | PRC2C_HUMAN Isoform 3 of Protein PRRC2C OS=Homo sapiens GN=PRRC2C                                                      |           | 695.38 |
| Q9Y520-4              | PRC2C_HUMAN Isoform 4 of Protein PRRC2C OS=Homo sapiens GN=PRRC2C                                                      |           | 759.44 |
| Q9Y520-5              | PRC2C_HUMAN Isoform 5 of Protein PRRC2C OS=Homo sapiens GN=PRRC2C                                                      |           | 761.45 |
| Q9Y520-6              | PRC2C_HUMAN Isoform 6 of Protein PRRC2C OS=Homo sapiens GN=PRRC2C                                                      |           | 759.44 |
| Q9Y520-7              | PRC2C_HUMAN Isoform 7 of Protein PRRC2C OS=Homo sapiens GN=PRRC2C                                                      |           | 759.05 |
| Q9Y520-7;Q9Y520;Q9Y52 | 7 BA2L2_HUMAN Isoform 7 of Protein BAT2-like 2 OS=Homo sapiens GN=BAT2L2;>sp Q9Y520 BA2L2_HUMAN Protein BAT2-like 2 OS | 2.76E-15  |        |
| Q9Y520-7;Q9Y520;Q9Y52 | 7 PRC2C_HUMAN Isoform 7 of Protein PRRC2C OS=Homo sapiens GN=PRRC2C;>sp Q9Y520 PRC2C_HUMAN Protein PRRC2C OS=Hon       | 1.52E-32  |        |
| Q9Y530                | CF130_HUMAN Uncharacterized protein C6orf130 OS=Homo sapiens GN=C6orf130 PE=1 SV=2                                     |           | 202.18 |
| Q9Y536                | PAL4A_HUMAN Peptidylprolyl cis-trans isomerase A-like 4A/B/C OS=Homo sapiens GN=PPIAL4A PE=1 SV=1                      |           | 174.74 |
| Q9Y547                | HSB11_HUMAN Heat shock protein beta-11 OS=Homo sapiens GN=HSPB11 PE=1 SV=1                                             | 2.14E-06  |        |
| Q9Y570                | PPME1_HUMAN Protein phosphatase methylesterase 1 OS=Homo sapiens GN=PPME1 PE=1 SV=3                                    |           | 21.58  |
| Q9Y570-2              | PPME1_HUMAN Isoform 2 of Protein phosphatase methylesterase 1 OS=Homo sapiens GN=PPME1                                 |           | 21.58  |
| Q9Y570-3              | PPME1_HUMAN Isoform 3 of Protein phosphatase methylesterase 1 OS=Homo sapiens GN=PPME1                                 |           | 21.58  |
| Q9Y570;Q9Y570-2       | PPME1_HUMAN Protein phosphatase methylesterase 1 OS=Homo sapiens GN=PPME1 PE=1 SV=3;>sp Q9Y570-2 PPME1_HUMAN Isofc     | 1.39E-253 |        |
| Q9Y580                | RBM7_HUMAN RNA-binding protein 7 OS=Homo sapiens GN=RBM7 PE=1 SV=1                                                     |           | 43.41  |
| Q9Y584                | TIM22_HUMAN Mitochondrial import inner membrane translocase subunit Tim22 OS=Homo sapiens GN=TIMM22 PE=1 SV=2          |           | 48.51  |
| Q9Y592                | CCD41_HUMAN Coiled-coil domain-containing protein 41 OS=Homo sapiens GN=CCDC41 PE=1 SV=2                               |           |        |
| Q9Y592-2              | CCD41_HUMAN Isoform 2 of Coiled-coil domain-containing protein 41 OS=Homo sapiens GN=CCDC41                            |           |        |
| Q9Y5A7;Q9Y5A7-2       | NUB1_HUMAN NEDD8 ultimate buster 1 OS=Homo sapiens GN=NUB1 PE=1 SV=2;>sp Q9Y5A7-2 NUB1_HUMAN Isoform 2 of NEDD8        | 7.08E-17  |        |
| Q9Y5A9                | YTHD2_HUMAN YTH domain family protein 2 OS=Homo sapiens GN=YTHDF2 PE=1 SV=2                                            |           | 130.11 |
| Q9Y5A9-2              | YTHD2_HUMAN Isoform 2 of YTH domain family protein 2 OS=Homo sapiens GN=YTHDF2                                         |           | 127.19 |
| Q9Y5A9;Q9Y5A9-2       | YTHD2_HUMAN YTH domain family protein 2 OS=Homo sapiens GN=YTHDF2 PE=1 SV=2;>sp Q9Y5A9-2 YTHD2_HUMAN Isoform 2 of      | 4.74E-19  |        |
| Q9Y5B0                | CTDP1_HUMAN RNA polymerase II subunit A C-terminal domain phosphatase OS=Homo sapiens GN=CTDP1 PE=1 SV=3               |           |        |
| Q9Y5B0-2              | CTDP1_HUMAN Isoform 2 of RNA polymerase II subunit A C-terminal domain phosphatase OS=Homo sapiens GN=CTDP1            |           |        |
| Q9Y5B0-3              | CTDP1_HUMAN Isoform 3 of RNA polymerase II subunit A C-terminal domain phosphatase OS=Homo sapiens GN=CTDP1            |           |        |
| Q9Y5B0-4              | CTDP1_HUMAN Isoform 4 of RNA polymerase II subunit A C-terminal domain phosphatase OS=Homo sapiens GN=CTDP1            |           |        |
| Q9Y5B0;Q9Y5B0-4;Q9Y5B | CTDP1_HUMAN RNA polymerase II subunit A C-terminal domain phosphatase OS=Homo sapiens GN=CTDP1 PE=1 SV=3;>sp Q9Y5B0    | 1.25E-08  |        |
| Q9Y5B6                | GCFC1_HUMAN GC-rich sequence DNA-binding factor 1 OS=Homo sapiens GN=GCFC1 PE=1 SV=2                                   |           | 57.73  |
| Q9Y5B6-2              | GCFC1_HUMAN Isoform B of GC-rich sequence DNA-binding factor 1 OS=Homo sapiens GN=GCFC1                                |           | 57.73  |
| Q9Y5B6-3              | GCFC1_HUMAN Isoform C of GC-rich sequence DNA-binding factor 1 OS=Homo sapiens GN=GCFC1                                |           | 7.88   |
| Q9Y5B6-4              | GCFC1_HUMAN Isoform D of GC-rich sequence DNA-binding factor 1 OS=Homo sapiens GN=GCFC1                                |           | 57.73  |
| Q9Y5B6;Q9Y5B6-2       | GCFC1_HUMAN GC-rich sequence DNA-binding factor 1 OS=Homo sapiens GN=GCFC1 PE=1 SV=2;>sp Q9Y5B6-2 GCFC1_HUMAN Iso      | 1.30E-14  |        |
| Q9Y5B8;B3KSW9;B4DXC8  | NDK7_HUMAN Nucleoside diphosphate kinase 7 OS=Homo sapiens GN=NME7 PE=1 SV=1;>tr B3KSW9 B3KSW9_HUMAN Non-metast        | 6.15E-40  |        |
| Q9Y5B9                | SP16H_HUMAN FACT complex subunit SPT16 OS=Homo sapiens GN=SUPT16H PE=1 SV=1                                            |           | 620.8  |
| Q9Y5E1                | PCDB9_HUMAN Protocadherin beta-9 OS=Homo sapiens GN=PCDHB9 PE=2 SV=2                                                   |           |        |
| Q9Y5E2                | PCDB7_HUMAN Protocadherin beta-7 OS=Homo sapiens GN=PCDHB7 PE=2 SV=1                                                   |           |        |
| Q9Y5E3                | PCDB6_HUMAN Protocadherin beta-6 OS=Homo sapiens GN=PCDHB6 PE=1 SV=1                                                   |           |        |
| Q9Y5E4                | PCDB5_HUMAN Protocadherin beta-5 OS=Homo sapiens GN=PCDHB5 PE=1 SV=1                                                   |           |        |
| Q9Y5E5                | PCDB4_HUMAN Protocadherin beta-4 OS=Homo sapiens GN=PCDHB4 PE=2 SV=1                                                   |           |        |
| Q9Y5E6                | PCDB3_HUMAN Protocadherin beta-3 OS=Homo sapiens GN=PCDHB3 PE=2 SV=1                                                   |           |        |
| Q9Y5E9                | PCDBE_HUMAN Protocadherin beta-14 OS=Homo sapiens GN=PCDHB14 PE=2 SV=1                                                 |           |        |
| Q9Y5F1                | PCDBC_HUMAN Protocadherin beta-12 OS=Homo sapiens GN=PCDHB12 PE=2 SV=1                                                 |           |        |
| Q9Y5H4                | PCDG1_HUMAN Protocadherin gamma-A1 OS=Homo sapiens GN=PCDHGA1 PE=2 SV=1                                                |           |        |
| Q9Y5H4-2              | PCDG1_HUMAN Isoform 2 of Protocadherin gamma-A1 OS=Homo sapiens GN=PCDHGA1                                             |           |        |
| Q9Y5J1                | UTP18_HUMAN U3 small nucleolar RNA-associated protein 18 homolog OS=Homo sapiens GN=UTP18 PE=1 SV=3                    |           | 69.66  |
| Q9Y5J5                | PHLA3_HUMAN Pleckstrin homology-like domain family A member 3 OS=Homo sapiens GN=PHLDA3 PE=1 SV=1                      |           | 13.44  |
| Q9Y5J7                | TIM9_HUMAN Mitochondrial import inner membrane translocase subunit Tim9 OS=Homo sapiens GN=TIMM9 PE=1 SV=1             |           | 33.12  |
| Q9Y5J9                | TIM8B_HUMAN Mitochondrial import inner membrane translocase subunit Tim8 B OS=Homo sapiens GN=TIMM8B PE=1 SV=1         |           |        |
| Q9Y5K3                | PCY1B_HUMAN Choline-phosphate cytidyltransferase B OS=Homo sapiens GN=PCYT1B PE=1 SV=1                                 |           | 66.84  |
| Q9Y5K3-2              | PCY1B_HUMAN Isoform 1 of Choline-phosphate cytidyltransferase B OS=Homo sapiens GN=PCYT1B                              |           | 66.84  |
| Q9Y5K3-3              | PCY1B_HUMAN Isoform 3 of Choline-phosphate cytidyltransferase B OS=Homo sapiens GN=PCYT1B                              |           | 66.84  |
| Q9Y5K5                | UCHL5_HUMAN Ubiquitin carboxyl-terminal hydrolase isozyme L5 OS=Homo sapiens GN=UCHL5 PE=1 SV=3                        |           | 69.58  |
| Q9Y5K5-2              | UCHL5_HUMAN Isoform 2 of Ubiquitin carboxyl-terminal hydrolase isozyme L5 OS=Homo sapiens GN=UCHL5                     |           | 69.58  |
| Q9Y5K5-3              | UCHL5_HUMAN Isoform 3 of Ubiquitin carboxyl-terminal hydrolase isozyme L5 OS=Homo sapiens GN=UCHL5                     |           | 69.58  |
| Q9Y5K5-4              | UCHL5_HUMAN Isoform 4 of Ubiquitin carboxyl-terminal hydrolase isozyme L5 OS=Homo sapiens GN=UCHL5                     |           | 69.58  |
| Q9Y5K5;Q9Y5K5-3;Q9Y5K | UCHL5_HUMAN Ubiquitin carboxyl-terminal hydrolase isozyme L5 OS=Homo sapiens GN=UCHL5 PE=1 SV=3;>sp Q9Y5K5-3 UCHL5_H   | 1.26E-37  |        |
| Q9Y5K6                | CD2AP_HUMAN CD2-associated protein OS=Homo sapiens GN=CD2AP PE=1 SV=1                                                  |           | 302.85 |
| Q9Y5K8                | VATD_HUMAN V-type proton ATPase subunit D OS=Homo sapiens GN=ATP6V1D PE=1 SV=1                                         | 1.51E-44  |        |

|                          |                                                                                                                             |           |        |
|--------------------------|-----------------------------------------------------------------------------------------------------------------------------|-----------|--------|
| Q9Y5L0                   | TNPO3_HUMAN Transportin-3 OS=Homo sapiens GN=TNPO3 PE=1 SV=3                                                                |           |        |
| Q9Y5L0-1                 | TNPO3_HUMAN Isoform 1 of Transportin-3 OS=Homo sapiens GN=TNPO3                                                             |           |        |
| Q9Y5L0-1;Q9Y5L0;Q9Y5L0-3 | 1 TNPO3_HUMAN Isoform 1 of Transportin-3 OS=Homo sapiens GN=TNPO3;>sp Q9Y5L0 TNPO3_HUMAN Transportin-3 OS=Homo sap          | 9.88E-15  |        |
| Q9Y5L0-3                 | TNPO3_HUMAN Isoform 3 of Transportin-3 OS=Homo sapiens GN=TNPO3                                                             |           |        |
| Q9Y5L0;Q9Y5L0-3;Q9Y5L0-1 | 3 TNPO3_HUMAN Transportin-3 OS=Homo sapiens GN=TNPO3 PE=1 SV=3;>sp Q9Y5L0-3 TNPO3_HUMAN Isoform 3 of Transportin-3 O        | 4.30E-57  |        |
| Q9Y5L4                   | TIM13_HUMAN Mitochondrial import inner membrane translocase subunit Tim13 OS=Homo sapiens GN=TIMM13 PE=1 SV=1               |           | 207.22 |
| Q9Y5M8                   | SRPRB_HUMAN Signal recognition particle receptor subunit beta OS=Homo sapiens GN=SRPRB PE=1 SV=3                            |           | 508.69 |
| Q9Y5N5                   | HEMK2_HUMAN HemK methyltransferase family member 2 OS=Homo sapiens GN=N6AMT1 PE=1 SV=3                                      |           |        |
| Q9Y5N5-2                 | HEMK2_HUMAN Isoform 2 of HemK methyltransferase family member 2 OS=Homo sapiens GN=N6AMT1                                   |           |        |
| Q9Y5N6                   | ORC6_HUMAN Origin recognition complex subunit 6 OS=Homo sapiens GN=ORC6 PE=1 SV=1                                           |           |        |
| Q9Y5P6-2;Q9Y5P6          | 2 GMPPB_HUMAN Isoform 2 of Mannose-1-phosphate guanylyltransferase beta OS=Homo sapiens GN=GMPPB;>sp Q9Y5P6 GMPPB_HUI       | 5.69E-40  |        |
| Q9Y5P8                   | P2R3B_HUMAN Serine/threonine-protein phosphatase 2A regulatory subunit B" subunit beta OS=Homo sapiens GN=PPP2R3B PE=1 SV=2 |           |        |
| Q9Y5Q8                   | TF3C5_HUMAN General transcription factor 3C polypeptide 5 OS=Homo sapiens GN=GTF3C5 PE=1 SV=2                               |           | 30.46  |
| Q9Y5Q8-2                 | TF3C5_HUMAN Isoform 2 of General transcription factor 3C polypeptide 5 OS=Homo sapiens GN=GTF3C5                            |           | 3.07   |
| Q9Y5Q8-3                 | TF3C5_HUMAN Isoform 3 of General transcription factor 3C polypeptide 5 OS=Homo sapiens GN=GTF3C5                            |           | 30.46  |
| Q9Y5Q9                   | TF3C3_HUMAN General transcription factor 3C polypeptide 3 OS=Homo sapiens GN=GTF3C3 PE=1 SV=1                               |           |        |
| Q9Y5Q9-2                 | TF3C3_HUMAN Isoform 2 of General transcription factor 3C polypeptide 3 OS=Homo sapiens GN=GTF3C3                            |           |        |
| Q9Y5Q9;Q9Y5Q9-2          | TF3C3_HUMAN General transcription factor 3C polypeptide 3 OS=Homo sapiens GN=GTF3C3 PE=1 SV=1;>sp Q9Y5Q9-2 TF3C3_HUM        | 5.36E-19  |        |
| Q9Y5R2                   | MMP24_HUMAN Matrix metalloproteinase-24 OS=Homo sapiens GN=MMP24 PE=1 SV=1                                                  |           | 10.09  |
| Q9Y5R8                   | TPPC1_HUMAN Trafficking protein particle complex subunit 1 OS=Homo sapiens GN=TRAPP1 PE=1 SV=1                              | 3.42E-05  |        |
| Q9Y5S2                   | MRCKB_HUMAN Serine/threonine-protein kinase MRCK beta OS=Homo sapiens GN=CDC42BPB PE=1 SV=2                                 |           |        |
| Q9Y5S9                   | RBM8A_HUMAN RNA-binding protein 8A OS=Homo sapiens GN=RBM8A PE=1 SV=1                                                       |           | 215.79 |
| Q9Y5S9-2                 | RBM8A_HUMAN Isoform 2 of RNA-binding protein 8A OS=Homo sapiens GN=RBM8A                                                    |           | 220.79 |
| Q9Y5S9;Q9Y5S9-2          | RBM8A_HUMAN RNA-binding protein 8A OS=Homo sapiens GN=RBM8A PE=1 SV=1;>sp Q9Y5S9-2 RBM8A_HUMAN Isoform 2 of RNA-            | 6.87E-156 |        |
| Q9Y5T4                   | DJC15_HUMAN DnaJ homolog subfamily C member 15 OS=Homo sapiens GN=DNAJC15 PE=1 SV=2                                         | 3.13E-10  |        |
| Q9Y5T5;Q9Y5T5-2;Q9Y5T5-1 | UBP16_HUMAN Ubiquitin carboxyl-terminal hydrolase 16 OS=Homo sapiens GN=USP16 PE=1 SV=1;>sp Q9Y5T5-2 UBP16_HUMAN Iso        | 3.10E-06  |        |
| Q9Y5U9                   | IR3IP_HUMAN Immediate early response 3-interacting protein 1 OS=Homo sapiens GN=IER3IP1 PE=1 SV=1                           |           |        |
| Q9Y5V0                   | ZNF706_HUMAN Zinc finger protein 706 OS=Homo sapiens GN=ZNF706 PE=1 SV=1                                                    |           | 57.1   |
| Q9Y5V3-2;Q9Y5V3          | 2 MAGD1_HUMAN Isoform 2 of Melanoma-associated antigen D1 OS=Homo sapiens GN=MAGED1;>sp Q9Y5V3 MAGD1_HUMAN Melar            | 5.23E-43  |        |
| Q9Y5X1                   | SNX9_HUMAN Sorting nexin-9 OS=Homo sapiens GN=SNX9 PE=1 SV=1                                                                | 5.41E-20  |        |
| Q9Y5X2                   | SNX8_HUMAN Sorting nexin-8 OS=Homo sapiens GN=SNX8 PE=1 SV=1                                                                | 5.74E-09  |        |
| Q9Y5X3                   | SNX5_HUMAN Sorting nexin-5 OS=Homo sapiens GN=SNX5 PE=1 SV=1                                                                | 1.28E-34  |        |
| Q9Y5Y2                   | NUBP2_HUMAN Cytosolic Fe-S cluster assembly factor NUBP2 OS=Homo sapiens GN=NUBP2 PE=1 SV=1                                 | 2.60E-99  |        |
| Q9Y5Z4;Q9Y5Z4-2          | HEBP2_HUMAN Heme-binding protein 2 OS=Homo sapiens GN=HEBP2 PE=1 SV=1;>sp Q9Y5Z4-2 HEBP2_HUMAN Isoform 2 of Heme            | 2.96E-29  |        |
| Q9Y5Z7                   | HCFC2_HUMAN Host cell factor 2 OS=Homo sapiens GN=HCFC2 PE=1 SV=1                                                           |           | 38.48  |
| Q9Y605                   | MOFA1_HUMAN MORF4 family-associated protein 1 OS=Homo sapiens GN=MRFAP1 PE=1 SV=1                                           |           |        |
| Q9Y606                   | TRUA_HUMAN tRNA pseudouridine synthase A, mitochondrial OS=Homo sapiens GN=PUS1 PE=1 SV=3                                   |           |        |
| Q9Y606-2                 | TRUA_HUMAN Isoform 2 of tRNA pseudouridine synthase A, mitochondrial OS=Homo sapiens GN=PUS1                                |           |        |
| Q9Y606;Q9Y606-2          | TRUA_HUMAN tRNA pseudouridine synthase A, mitochondrial OS=Homo sapiens GN=PUS1 PE=1 SV=3;>sp Q9Y606-2 TRUA_HUMAN           | 8.51E-49  |        |
| Q9Y608                   | LRRF2_HUMAN Leucine-rich repeat flightless-interacting protein 2 OS=Homo sapiens GN=LRRFIP2 PE=1 SV=1                       |           | 224.62 |
| Q9Y608-2                 | LRRF2_HUMAN Isoform 2 of Leucine-rich repeat flightless-interacting protein 2 OS=Homo sapiens GN=LRRFIP2                    |           | 217.36 |
| Q9Y608-3                 | LRRF2_HUMAN Isoform 3 of Leucine-rich repeat flightless-interacting protein 2 OS=Homo sapiens GN=LRRFIP2                    |           | 109.5  |
| Q9Y608-4                 | LRRF2_HUMAN Isoform 4 of Leucine-rich repeat flightless-interacting protein 2 OS=Homo sapiens GN=LRRFIP2                    |           | 217.36 |
| Q9Y613                   | FHOD1_HUMAN FH1/FH2 domain-containing protein 1 OS=Homo sapiens GN=FHOD1 PE=1 SV=3                                          | 5.35E-112 |        |
| Q9Y617                   | SERC_HUMAN Phosphoserine aminotransferase OS=Homo sapiens GN=PSAT1 PE=1 SV=2                                                |           | 190.45 |
| Q9Y617-2                 | SERC_HUMAN Isoform 2 of Phosphoserine aminotransferase OS=Homo sapiens GN=PSAT1                                             |           | 148.49 |
| Q9Y617;Q9Y617-2          | SERC_HUMAN Phosphoserine aminotransferase OS=Homo sapiens GN=PSAT1 PE=1 SV=2;>sp Q9Y617-2 SERC_HUMAN Isoform 2 of           | 3.52E-122 |        |
| Q9Y618                   | NCOR2_HUMAN Nuclear receptor corepressor 2 OS=Homo sapiens GN=NCOR2 PE=1 SV=2                                               |           | 69.76  |
| Q9Y618-2                 | NCOR2_HUMAN Isoform 2 of Nuclear receptor corepressor 2 OS=Homo sapiens GN=NCOR2                                            |           | 2.79   |
| Q9Y618-3                 | NCOR2_HUMAN Isoform 3 of Nuclear receptor corepressor 2 OS=Homo sapiens GN=NCOR2                                            |           | 69.76  |
| Q9Y618-4                 | NCOR2_HUMAN Isoform 4 of Nuclear receptor corepressor 2 OS=Homo sapiens GN=NCOR2                                            |           | 69.76  |
| Q9Y618-5                 | NCOR2_HUMAN Isoform 5 of Nuclear receptor corepressor 2 OS=Homo sapiens GN=NCOR2                                            |           | 69.76  |
| Q9Y618;Q9Y618-3;Q9Y618-2 | NCOR2_HUMAN Nuclear receptor corepressor 2 OS=Homo sapiens GN=NCOR2 PE=1 SV=2;>sp Q9Y618-3 NCOR2_HUMAN Isoform 3            | 3.83E-13  |        |
| Q9Y619                   | ORNT1_HUMAN Mitochondrial ornithine transporter 1 OS=Homo sapiens GN=SLC25A15 PE=1 SV=1                                     | 1.58E-09  |        |
| Q9Y623                   | MYH4_HUMAN Myosin-4 OS=Homo sapiens GN=MYH4 PE=1 SV=2                                                                       |           | 93.11  |
| Q9Y624                   | JAM1_HUMAN Junctional adhesion molecule A OS=Homo sapiens GN=F11R PE=1 SV=1                                                 |           | 40.7   |
| Q9Y625;B4E2M1            | GPC6_HUMAN Glypican-6 OS=Homo sapiens GN=GPC6 PE=2 SV=1;>tr B4E2M1 B4E2M1_HUMAN cDNA FLJ58478, highly similar to G          | 2.82E-10  |        |
| Q9Y639                   | NPTN_HUMAN Neuroplastin OS=Homo sapiens GN=NPTN PE=1 SV=2                                                                   |           | 160.76 |
| Q9Y639-1                 | NPTN_HUMAN Isoform 1 of Neuroplastin OS=Homo sapiens GN=NPTN                                                                |           | 160.76 |
| Q9Y639-3                 | NPTN_HUMAN Isoform 3 of Neuroplastin OS=Homo sapiens GN=NPTN                                                                |           | 118.57 |
| Q9Y639-4                 | NPTN_HUMAN Isoform 4 of Neuroplastin OS=Homo sapiens GN=NPTN                                                                |           | 118.57 |



|                                                     |                                                                                                                                                                                                                           |           |        |
|-----------------------------------------------------|---------------------------------------------------------------------------------------------------------------------------------------------------------------------------------------------------------------------------|-----------|--------|
| Q9Y639-5                                            | NPTN_HUMAN Isoform 5 of Neuroplastin OS=Homo sapiens GN=NPTN                                                                                                                                                              |           | 118.57 |
| Q9Y639;Q9Y639-1;Q9Y639-2                            | NPTN_HUMAN Neuroplastin OS=Homo sapiens GN=NPTN PE=1 SV=2;>sp Q9Y639-1 NPTN_HUMAN Isoform 1 of Neuroplastin OS=Homo sapiens GN=NPTN PE=1 SV=2                                                                             | 5.62E-148 |        |
| Q9Y657                                              | SPIN1_HUMAN Spindlin-1 OS=Homo sapiens GN=SPIN1 PE=1 SV=3                                                                                                                                                                 |           | 48.66  |
| Q9Y673;Q9Y673-2                                     | ALG5_HUMAN Dolichyl-phosphate beta-glucosyltransferase OS=Homo sapiens GN=ALG5 PE=1 SV=1;>sp Q9Y673-2 ALG5_HUMAN Isoform 2 of Dolichyl-phosphate beta-glucosyltransferase OS=Homo sapiens GN=ALG5 PE=1 SV=1               | 3.23E-12  |        |
| Q9Y676                                              | RT18B_HUMAN 28S ribosomal protein S18b, mitochondrial OS=Homo sapiens GN=MRPS18B PE=1 SV=1                                                                                                                                |           | 173.61 |
| Q9Y678                                              | COPG_HUMAN Coatamer subunit gamma OS=Homo sapiens GN=COPG PE=1 SV=1                                                                                                                                                       |           | 383.48 |
| Q9Y679                                              | AUP1_HUMAN Ancient ubiquitous protein 1 OS=Homo sapiens GN=AUP1 PE=1 SV=1                                                                                                                                                 |           | 27.15  |
| Q9Y679-2                                            | AUP1_HUMAN Isoform Short of Ancient ubiquitous protein 1 OS=Homo sapiens GN=AUP1                                                                                                                                          |           | 27.15  |
| Q9Y679-3                                            | AUP1_HUMAN Isoform 3 of Ancient ubiquitous protein 1 OS=Homo sapiens GN=AUP1                                                                                                                                              |           | 27.15  |
| Q9Y679;Q9Y679-2;Q9Y679-3                            | AUP1_HUMAN Ancient ubiquitous protein 1 OS=Homo sapiens GN=AUP1 PE=1 SV=1;>sp Q9Y679-2 AUP1_HUMAN Isoform Short of Ancient ubiquitous protein 1 OS=Homo sapiens GN=AUP1                                                   | 6.30E-17  |        |
| Q9Y680;Q4ZG70;Q9Y680-1                              | FKBP7_HUMAN Peptidyl-prolyl cis-trans isomerase FKBP7 OS=Homo sapiens GN=FKBP7 PE=1 SV=1;>tr Q4ZG70 Q4ZG70_HUMAN Peptidyl-prolyl cis-trans isomerase FKBP7 OS=Homo sapiens GN=FKBP7 PE=1 SV=1                             | 4.20E-08  |        |
| Q9Y696                                              | CLIC4_HUMAN Chloride intracellular channel protein 4 OS=Homo sapiens GN=CLIC4 PE=1 SV=4                                                                                                                                   |           | 980.15 |
| Q9Y697                                              | NFS1_HUMAN Cysteine desulfurase, mitochondrial OS=Homo sapiens GN=NFS1 PE=1 SV=3                                                                                                                                          |           |        |
| Q9Y697-2                                            | NFS1_HUMAN Isoform Cytoplasmic of Cysteine desulfurase, mitochondrial OS=Homo sapiens GN=NFS1                                                                                                                             |           |        |
| Q9Y697;Q9Y697-2                                     | NFS1_HUMAN Cysteine desulfurase, mitochondrial OS=Homo sapiens GN=NFS1 PE=1 SV=3;>sp Q9Y697-2 NFS1_HUMAN Isoform Cytoplasmic of Cysteine desulfurase, mitochondrial OS=Homo sapiens GN=NFS1                               | 1.40E-12  |        |
| Q9Y6A4                                              | CP080_HUMAN UPF0468 protein C16orf80 OS=Homo sapiens GN=C16orf80 PE=1 SV=1                                                                                                                                                |           | 235.1  |
| Q9Y6A5                                              | TACC3_HUMAN Transforming acidic coiled-coil-containing protein 3 OS=Homo sapiens GN=TACC3 PE=1 SV=1                                                                                                                       | 1.17E-16  |        |
| Q9Y6B6                                              | SAR1B_HUMAN GTP-binding protein SAR1b OS=Homo sapiens GN=SAR1B PE=1 SV=1                                                                                                                                                  |           | 149.51 |
| Q9Y6B7                                              | AP4B1_HUMAN AP-4 complex subunit beta-1 OS=Homo sapiens GN=AP4B1 PE=2 SV=2                                                                                                                                                | 4.44E-47  |        |
| Q9Y6C2                                              | EMIL1_HUMAN EMILIN-1 OS=Homo sapiens GN=EMILIN1 PE=1 SV=2                                                                                                                                                                 |           | 27.58  |
| Q9Y6C9                                              | MTCH2_HUMAN Mitochondrial carrier homolog 2 OS=Homo sapiens GN=MTCH2 PE=1 SV=1                                                                                                                                            |           | 136.37 |
| Q9Y6D0                                              | SELK_HUMAN Selenoprotein K OS=Homo sapiens GN=SELK PE=1 SV=3                                                                                                                                                              |           | 67.43  |
| Q9Y6D5                                              | BIG2_HUMAN Brefeldin A-inhibited guanine nucleotide-exchange protein 2 OS=Homo sapiens GN=ARFGEF2 PE=1 SV=3                                                                                                               | 1.38E-16  |        |
| Q9Y6D6                                              | BIG1_HUMAN Brefeldin A-inhibited guanine nucleotide-exchange protein 1 OS=Homo sapiens GN=ARFGEF1 PE=1 SV=2                                                                                                               |           |        |
| Q9Y6D9                                              | MD1L1_HUMAN Mitotic spindle assembly checkpoint protein MAD1 OS=Homo sapiens GN=MAD1L1 PE=1 SV=2                                                                                                                          |           | 47.2   |
| Q9Y6E0                                              | STK24_HUMAN Serine/threonine-protein kinase 24 OS=Homo sapiens GN=STK24 PE=1 SV=1                                                                                                                                         |           | 93.67  |
| Q9Y6E0-2                                            | STK24_HUMAN Isoform A of Serine/threonine-protein kinase 24 OS=Homo sapiens GN=STK24                                                                                                                                      |           | 93.67  |
| Q9Y6E0;Q9Y6E0-2                                     | STK24_HUMAN Serine/threonine-protein kinase 24 OS=Homo sapiens GN=STK24 PE=1 SV=1;>sp Q9Y6E0-2 STK24_HUMAN Isoform A of Serine/threonine-protein kinase 24 OS=Homo sapiens GN=STK24                                       | 2.70E-22  |        |
| Q9Y6E2                                              | BZW2_HUMAN Basic leucine zipper and W2 domain-containing protein 2 OS=Homo sapiens GN=BZW2 PE=1 SV=1                                                                                                                      |           | 94     |
| Q9Y6F6                                              | MRVI1_HUMAN Protein MRVI1 OS=Homo sapiens GN=MRVI1 PE=1 SV=2                                                                                                                                                              |           |        |
| Q9Y6F6-2                                            | MRVI1_HUMAN Isoform 2 of Protein MRVI1 OS=Homo sapiens GN=MRVI1                                                                                                                                                           |           |        |
| Q9Y6F6-3                                            | MRVI1_HUMAN Isoform 3 of Protein MRVI1 OS=Homo sapiens GN=MRVI1                                                                                                                                                           |           |        |
| Q9Y6F6-4                                            | MRVI1_HUMAN Isoform 4 of Protein MRVI1 OS=Homo sapiens GN=MRVI1                                                                                                                                                           |           |        |
| Q9Y6F6-5                                            | MRVI1_HUMAN Isoform 5 of Protein MRVI1 OS=Homo sapiens GN=MRVI1                                                                                                                                                           |           |        |
| Q9Y6F6-6                                            | MRVI1_HUMAN Isoform 6 of Protein MRVI1 OS=Homo sapiens GN=MRVI1                                                                                                                                                           |           |        |
| Q9Y6F7                                              | CDY2_HUMAN Testis-specific chromodomain protein Y 2 OS=Homo sapiens GN=CDY2A PE=1 SV=1                                                                                                                                    | 8.68E-16  |        |
| Q9Y6G3                                              | RM42_HUMAN 39S ribosomal protein L42, mitochondrial OS=Homo sapiens GN=MRPL42 PE=1 SV=1                                                                                                                                   | 4.26E-34  |        |
| Q9Y6G9                                              | DC1L1_HUMAN Cytoplasmic dynein 1 light intermediate chain 1 OS=Homo sapiens GN=DYNC1L1 PE=1 SV=3                                                                                                                          |           | 76.93  |
| Q9Y6H1                                              | CHCH2_HUMAN Coiled-coil-helix-coiled-coil-helix domain-containing protein 2, mitochondrial OS=Homo sapiens GN=CHCHD2 PE=1 SV=1                                                                                            |           | 40.68  |
| Q9Y6H3                                              | ATP23_HUMAN Mitochondrial inner membrane protease ATP23 homolog OS=Homo sapiens GN=XRCC6BP1 PE=1 SV=3                                                                                                                     |           |        |
| Q9Y6I3                                              | EPN1_HUMAN Epsin-1 OS=Homo sapiens GN=EPN1 PE=1 SV=2                                                                                                                                                                      |           | 210.23 |
| Q9Y6I3-1                                            | EPN1_HUMAN Isoform 2 of Epsin-1 OS=Homo sapiens GN=EPN1                                                                                                                                                                   |           | 210.23 |
| Q9Y6I3-1;Q9Y6I3;Q9Y6I3-2                            | EPN1_HUMAN Isoform 2 of Epsin-1 OS=Homo sapiens GN=EPN1;>sp Q9Y6I3 EPN1_HUMAN Epsin-1 OS=Homo sapiens GN=EPN1 PE=1 SV=2                                                                                                   | 1.43E-07  |        |
| Q9Y6I3-3                                            | EPN1_HUMAN Isoform 3 of Epsin-1 OS=Homo sapiens GN=EPN1                                                                                                                                                                   |           | 210.23 |
| Q9Y6I9                                              | TX264_HUMAN Testis-expressed sequence 264 protein OS=Homo sapiens GN=TEX264 PE=1 SV=1                                                                                                                                     |           |        |
| Q9Y6J9                                              | TAF6L_HUMAN TAF6-like RNA polymerase II p300/CBP-associated factor-associated factor 65 kDa subunit 6L OS=Homo sapiens GN=TAF6L PE=1 SV=1                                                                                 |           | 17.29  |
| Q9Y6K1                                              | DNM3A_HUMAN DNA (cytosine-5)-methyltransferase 3A OS=Homo sapiens GN=DNMT3A PE=1 SV=4                                                                                                                                     |           |        |
| Q9Y6K1-2                                            | DNM3A_HUMAN Isoform 2 of DNA (cytosine-5)-methyltransferase 3A OS=Homo sapiens GN=DNMT3A                                                                                                                                  |           |        |
| Q9Y6K1-3                                            | DNM3A_HUMAN Isoform 3 of DNA (cytosine-5)-methyltransferase 3A OS=Homo sapiens GN=DNMT3A                                                                                                                                  |           |        |
| Q9Y6K5                                              | OAS3_HUMAN 2'-5'-oligoadenylate synthase 3 OS=Homo sapiens GN=OAS3 PE=1 SV=3                                                                                                                                              |           | 30.41  |
| Q9Y6K8;Q9Y6K8-3;Q9Y6K8-4                            | KAD5_HUMAN Adenylate kinase isoenzyme 5 OS=Homo sapiens GN=AK5 PE=1 SV=2;>sp Q9Y6K8-3 KAD5_HUMAN Isoform 3 of Adenylate kinase isoenzyme 5 OS=Homo sapiens GN=AK5 PE=1 SV=2                                               | 5.05E-10  |        |
| Q9Y6M1                                              | IF2B2_HUMAN Insulin-like growth factor 2 mRNA-binding protein 2 OS=Homo sapiens GN=IGF2BP2 PE=1 SV=2                                                                                                                      |           | 339.5  |
| Q9Y6M1-1                                            | IF2B2_HUMAN Isoform 2 of Insulin-like growth factor 2 mRNA-binding protein 2 OS=Homo sapiens GN=IGF2BP2                                                                                                                   |           | 339.5  |
| Q9Y6M1-3                                            | IF2B2_HUMAN Isoform 3 of Insulin-like growth factor 2 mRNA-binding protein 2 OS=Homo sapiens GN=IGF2BP2                                                                                                                   |           | 272.58 |
| Q9Y6M1-4                                            | IF2B2_HUMAN Isoform 4 of Insulin-like growth factor 2 mRNA-binding protein 2 OS=Homo sapiens GN=IGF2BP2                                                                                                                   |           | 272.58 |
| Q9Y6M1-5                                            | IF2B2_HUMAN Isoform 5 of Insulin-like growth factor 2 mRNA-binding protein 2 OS=Homo sapiens GN=IGF2BP2                                                                                                                   |           | 272.58 |
| Q9Y6M1;Q9Y6M1-1;Q9Y6M1-2;Q9Y6M1-3;Q9Y6M1-4;Q9Y6M1-5 | IF2B2_HUMAN Insulin-like growth factor 2 mRNA-binding protein 2 OS=Homo sapiens GN=IGF2BP2 PE=1 SV=2;>sp Q9Y6M1-1 IF2B2_HUMAN Isoform 2 of Insulin-like growth factor 2 mRNA-binding protein 2 OS=Homo sapiens GN=IGF2BP2 | 2.79E-19  |        |
| Q9Y6M9                                              | NDUB9_HUMAN NADH dehydrogenase [ubiquinone] 1 beta subcomplex subunit 9 OS=Homo sapiens GN=NDUFB9 PE=1 SV=3                                                                                                               |           | 44.58  |
| Q9Y6N5                                              | SQRD_HUMAN Sulfide:quinone oxidoreductase, mitochondrial OS=Homo sapiens GN=SQRDL PE=1 SV=1                                                                                                                               |           | 159.19 |
| Q9Y6Q5                                              | AP1M2_HUMAN AP-1 complex subunit mu-2 OS=Homo sapiens GN=AP1M2 PE=1 SV=4                                                                                                                                                  |           |        |
| Q9Y6Q5-2                                            | AP1M2_HUMAN Isoform 2 of AP-1 complex subunit mu-2 OS=Homo sapiens GN=AP1M2                                                                                                                                               |           |        |

Q9Y6Q5-2;Q9Y6Q5 2|AP1M2\_HUMAN Isoform 2 of AP-1 complex subunit mu-2 OS=Homo sapiens GN=AP1M2;>sp|Q9Y6Q5|AP1M2\_HUMAN AP-1 complex 1.46E-118  
 Q9Y6R4 M3K4\_HUMAN Mitogen-activated protein kinase kinase kinase 4 OS=Homo sapiens GN=MAP3K4 PE=1 SV=2  
 Q9Y6R4-2 M3K4\_HUMAN Isoform 2 of Mitogen-activated protein kinase kinase kinase 4 OS=Homo sapiens GN=MAP3K4  
 Q9Y6U3 ADSV\_HUMAN Adseverin OS=Homo sapiens GN=SCIN PE=1 SV=4  
 Q9Y6U3-3 ADSV\_HUMAN Isoform 3 of Adseverin OS=Homo sapiens GN=SCIN  
 Q9Y6U3;Q9Y6U3-2;Q9Y6U3 ADSV\_HUMAN Adseverin OS=Homo sapiens GN=SCIN PE=1 SV=4;>sp|Q9Y6U3-2|ADSV\_HUMAN Isoform 2 of Adseverin OS=Homo sa 5.06E-27  
 Q9Y6V0 PCLO\_HUMAN Protein piccolo OS=Homo sapiens GN=PCLO PE=1 SV=4 61.32  
 Q9Y6V0-2 PCLO\_HUMAN Isoform 2 of Protein piccolo OS=Homo sapiens GN=PCLO 57.64  
 Q9Y6V0-4 PCLO\_HUMAN Isoform 4 of Protein piccolo OS=Homo sapiens GN=PCLO 6.49  
 Q9Y6V0-5 PCLO\_HUMAN Isoform 5 of Protein piccolo OS=Homo sapiens GN=PCLO 61.32  
 Q9Y6V0-6 PCLO\_HUMAN Isoform 6 of Protein piccolo OS=Homo sapiens GN=PCLO 57.64  
 Q9Y6V7 DDX49\_HUMAN Probable ATP-dependent RNA helicase DDX49 OS=Homo sapiens GN=DDX49 PE=1 SV=1  
 Q9Y6W5 WASF2\_HUMAN Wiskott-Aldrich syndrome protein family member 2 OS=Homo sapiens GN=WASF2 PE=1 SV=3 1.79E-29  
 Q9Y6X0 SETBP\_HUMAN SET-binding protein OS=Homo sapiens GN=SETBP1 PE=1 SV=3  
 Q9Y6X0-2 SETBP\_HUMAN Isoform 2 of SET-binding protein OS=Homo sapiens GN=SETBP1  
 Q9Y6X3 SCC4\_HUMAN MAU2 chromatid cohesion factor homolog OS=Homo sapiens GN=MAU2 PE=1 SV=2  
 Q9Y6X3-2 SCC4\_HUMAN Isoform 2 of MAU2 chromatid cohesion factor homolog OS=Homo sapiens GN=MAU2  
 Q9Y6X3-3 SCC4\_HUMAN Isoform 3 of MAU2 chromatid cohesion factor homolog OS=Homo sapiens GN=MAU2  
 Q9Y6X9 MORC2\_HUMAN MORC family CW-type zinc finger protein 2 OS=Homo sapiens GN=MORC2 PE=1 SV=2  
 Q9Y6Y0 NS1BP\_HUMAN Influenza virus NS1A-binding protein OS=Homo sapiens GN=IVNS1ABP PE=1 SV=3  
 Q9Y6Y8;Q9Y6Y8-2 S23IP\_HUMAN SEC23-interacting protein OS=Homo sapiens GN=SEC23IP PE=1 SV=1;>sp|Q9Y6Y8-2|S23IP\_HUMAN Isoform 2 of SEC 1.89E-08  
 Q9Y6Z7 COL10\_HUMAN Collectin-10 OS=Homo sapiens GN=COLEC10 PE=2 SV=2

A0AVT1;B3KSS1;A0AVT1- UBA6\_HUMAN Ubiquitin-like modifier-activating enzyme 6 OS=Homo sapiens GN=UBA6 PE=1 SV=1;>tr|B3KSS1|B3KSS1\_HUMAN cDN 0  
 A1L0T0;Q59GP4;A1L0T0- ILVBL\_HUMAN Acetolactate synthase-like protein OS=Homo sapiens GN=ILVBL PE=1 SV=2;>tr|Q59GP4|Q59GP4\_HUMAN IlvB (Bacter 6.20E-17  
 A6NCE7;Q658J6;Q9GZQ8 MP3B2\_HUMAN Microtubule-associated proteins 1A/1B light chain 3 beta 2 OS=Homo sapiens GN=MAP1LC3B2 PE=2 SV=1;>tr|Q658J 1.58E-05  
 A6NCE7;Q9GZQ8 MP3B2\_HUMAN Microtubule-associated proteins 1A/1B light chain 3 beta 2 OS=Homo sapiens GN=MAP1LC3B2 PE=2 SV=1;>sp|Q9GZ 3.81E-07  
 A6NCE7;Q9GZQ8;Q9H492 MP3B2\_HUMAN Microtubule-associated proteins 1A/1B light chain 3 beta 2 OS=Homo sapiens GN=MAP1LC3B2 PE=2 SV=1;>sp|Q9GZ 4.14E-09  
 A6NDU8;C9JZ41 CE051\_HUMAN UPF0600 protein C5orf51 OS=Homo sapiens GN=C5orf51 PE=1 SV=1;>tr|C9JZ41|C9JZ41\_HUMAN Uncharacterized pr 1.22E-08  
 A6NI72;P14598;A8MVU1; NCF1B\_HUMAN Putative neutrophil cytosol factor 1B OS=Homo sapiens GN=NCF1B PE=5 SV=2;>sp|P14598|NCF1\_HUMAN Neutrophil 7.98E-06  
 A6NKT7;Q7Z3J3 RGPD3\_HUMAN RanBP2-like and GRIP domain-containing protein 3 OS=Homo sapiens GN=RGPD3 PE=2 SV=2;>sp|Q7Z3J3|RGPD4\_H 5.57E-98  
 A6NKT7;Q7Z3J3;O14715; RGPD3\_HUMAN RanBP2-like and GRIP domain-containing protein 3 OS=Homo sapiens GN=RGPD3 PE=2 SV=2;>sp|Q7Z3J3|RGPD4\_H 1.02E-89  
 B9A064;P0CG04 IGLL5\_HUMAN Immunoglobulin lambda-like polypeptide 5 OS=Homo sapiens GN=IGLL5 PE=2 SV=2;>sp|P0CG04|LAC1\_HUMAN Ig lar 0  
 O00116;B7Z3Q4 ADAS\_HUMAN Alkylidihydroxyacetonephosphate synthase, peroxisomal OS=Homo sapiens GN=AGPS PE=1 SV=1;>tr|B7Z3Q4|B7Z3Q4 1.50E-95  
 O00139-4;O00139;O0013 4|KIF2A\_HUMAN Isoform 4 of Kinesin-like protein KIF2A OS=Homo sapiens GN=KIF2A;>sp|O00139|KIF2A\_HUMAN Kinesin-like protei 4.10E-10  
 O00154-4;O00154;O0015 4|BACH\_HUMAN Isoform 4 of Cytosolic acyl coenzyme A thioester hydrolase OS=Homo sapiens GN=ACOT7;>sp|O00154|BACH\_HUMA 2.07E-98  
 O00159;O00159-3;O0015 MYO1C\_HUMAN Myosin-Ic OS=Homo sapiens GN=MYO1C PE=1 SV=4;>sp|O00159-3|MYO1C\_HUMAN Isoform 3 of Myosin-Ic OS=Hon 2.97E-07  
 O00178;B2RDW9;B0QY59 GTPB1\_HUMAN GTP-binding protein 1 OS=Homo sapiens GN=GTPBP1 PE=1 SV=3;>tr|B2RDW9|B2RDW9\_HUMAN cDNA, FLJ96803, hi 9.14E-26  
 O00193;E3W975 SMAP\_HUMAN Small acidic protein OS=Homo sapiens GN=SMAP PE=1 SV=1;>tr|E3W975|E3W975\_HUMAN Uncharacterized protein O 6.12E-74  
 O00217;B4DYI3;Q53G17 NDUS8\_HUMAN NADH dehydrogenase [ubiquinone] iron-sulfur protein 8, mitochondrial OS=Homo sapiens GN=NDUFS8 PE=1 SV=1;> 1.32E-12  
 O00232;A6NP15 PSD12\_HUMAN 26S proteasome non-ATPase regulatory subunit 12 OS=Homo sapiens GN=PSMD12 PE=1 SV=3;>tr|A6NP15|A6NP15\_ 2.21E-235  
 O00233;O00233-2;C9JR21 PSMD9\_HUMAN 26S proteasome non-ATPase regulatory subunit 9 OS=Homo sapiens GN=PSMD9 PE=1 SV=3;>sp|O00233-2|PSMD9\_ 8.99E-29  
 O00264;Q61B11;B7Z1L3 PGRC1\_HUMAN Membrane-associated progesterone receptor component 1 OS=Homo sapiens GN=PGRMC1 PE=1 SV=3;>tr|Q61B11|Q 1.87E-45  
 O00273;Q53HN4;Q5T6G6 DFFA\_HUMAN DNA fragmentation factor subunit alpha OS=Homo sapiens GN=DFFA PE=1 SV=1;>tr|Q53HN4|Q53HN4\_HUMAN DNAat 4.19E-22  
 O00299;Q53FB0;Q5SRT3 CLIC1\_HUMAN Chloride intracellular channel protein 1 OS=Homo sapiens GN=CLIC1 PE=1 SV=4;>tr|Q53FB0|Q53FB0\_HUMAN Chlorid 1.02E-202  
 O00391;O00391-2 QSOX1\_HUMAN Sulfhydryl oxidase 1 OS=Homo sapiens GN=QSOX1 PE=1 SV=3;>sp|O00391-2|QSOX1\_HUMAN Isoform 2 of Sulfhydi 3.49E-10  
 O00410-3;O00410;O0041 3|IPO5\_HUMAN Isoform 3 of Importin-5 OS=Homo sapiens GN=IPO5;>sp|O00410|IPO5\_HUMAN Importin-5 OS=Homo sapiens GN=I 1.00E-249  
 O00442-2;O00442 2|RTC1\_HUMAN Isoform 2 of RNA 3-terminal phosphate cyclase OS=Homo sapiens GN=RTCD1;>sp|O00442|RTC1\_HUMAN RNA 3-terr 4.57E-08  
 O00469-2;O00469;B4DHC 2|PLOD2\_HUMAN Isoform 2 of Procollagen-lysine,2-oxoglutarate 5-dioxygenase 2 OS=Homo sapiens GN=PLOD2;>sp|O00469|PLOD2\_ 9.22E-30  
 O00487;Q59G89;Q53TH1;PSDE\_HUMAN 26S proteasome non-ATPase regulatory subunit 14 OS=Homo sapiens GN=PSMD14 PE=1 SV=1;>tr|Q59G89|Q59G89\_I 6.50E-42  
 O00505;Q5JVM9;Q53F09; IMA3\_HUMAN Importin subunit alpha-3 OS=Homo sapiens GN=KPNA3 PE=1 SV=2;>tr|Q5JVM9|Q5JVM9\_HUMAN Importin alpha-3 sul 2.21E-76  
 O00506;Q9P289-2 STK25\_HUMAN Serine/threonine-protein kinase 25 OS=Homo sapiens GN=STK25 PE=1 SV=1;>sp|Q9P289-2|MST4\_HUMAN Isoform 2 2.09E-75  
 O00507;O00507-2;Q9300 USP9Y\_HUMAN Probable ubiquitin carboxyl-terminal hydrolase FAF-Y OS=Homo sapiens GN=USP9Y PE=1 SV=2;>sp|O00507-2|USP9Y 7.98E-17  
 O00560;O00560-3 SDCB1\_HUMAN Syntenin-1 OS=Homo sapiens GN=SDCBP PE=1 SV=1;>sp|O00560-3|SDCB1\_HUMAN Isoform 3 of Syntenin-1 OS=H 6.90E-23  
 O00571;O15523 DDX3X\_HUMAN ATP-dependent RNA helicase DDX3X OS=Homo sapiens GN=DDX3X PE=1 SV=3;>sp|O15523|DDX3Y\_HUMAN ATP-de 0  
 O00622;Q6FI18;B4DI61;C CYR61\_HUMAN Protein CYR61 OS=Homo sapiens GN=CYR61 PE=1 SV=1;>tr|Q6FI18|Q6FI18\_HUMAN CYR61 protein OS=Homo sapie 5.75E-56  
 O00625;Q6FHD2 PIR\_HUMAN Pirin OS=Homo sapiens GN=PIR PE=1 SV=1;>tr|Q6FHD2|Q6FHD2\_HUMAN PIR protein (Fragment) OS=Homo sapiens GN 1.55E-14  
 O00764;O00764-3 PDXK\_HUMAN Pyridoxal kinase OS=Homo sapiens GN=PDXK PE=1 SV=1;>sp|O00764-3|PDXK\_HUMAN Isoform 3 of Pyridoxal kinase 1.54E-14  
 O00764;O00764-3;O0076 PDXK\_HUMAN Pyridoxal kinase OS=Homo sapiens GN=PDXK PE=1 SV=1;>sp|O00764-3|PDXK\_HUMAN Isoform 3 of Pyridoxal kinase 2.85E-89  
 O14493;P56747;O95484 CLD4\_HUMAN Claudin-4 OS=Homo sapiens GN=CLDN4 PE=1 SV=1;>sp|P56747|CLD6\_HUMAN Claudin-6 OS=Homo sapiens GN=CLD 2.19E-132  
 O14548;Q6FGA0;A8MZH9 COX7R\_HUMAN Cytochrome c oxidase subunit 7A-related protein, mitochondrial OS=Homo sapiens GN=COX7A2L PE=1 SV=2;>tr|Q6I 2.28E-09

|                                                                                                                                                    |           |
|----------------------------------------------------------------------------------------------------------------------------------------------------|-----------|
| O14579;Q53HJ6;Q9UGP6;COPE_HUMAN Coatomer subunit epsilon OS=Homo sapiens GN=COPE PE=1 SV=3;>tr Q53HJ6 Q53HJ6_HUMAN Epsilon subunit of coa          | 1.82E-69  |
| O14602;P47813 IF1AY_HUMAN Eukaryotic translation initiation factor 1A, Y-chromosomal OS=Homo sapiens GN=EIF1AY PE=1 SV=4;>sp P47813 IF1A           | 2.13E-55  |
| O14617-5;O14617;O14615 AP3D1_HUMAN Isoform 5 of AP-3 complex subunit delta-1 OS=Homo sapiens GN=AP3D1;>sp O14617 AP3D1_HUMAN AP-3 comple           | 2.29E-19  |
| O14618;Q8NEV0 CCS_HUMAN Copper chaperone for superoxide dismutase OS=Homo sapiens GN=CCS PE=1 SV=1;>tr Q8NEV0 Q8NEV0_HUMAN Sup                     | 3.84E-11  |
| O14641;Q92997 DVL2_HUMAN Segment polarity protein dishevelled homolog DVL-2 OS=Homo sapiens GN=DVL2 PE=1 SV=1;>sp Q92997 DVL2_HUM                  | 4.68E-13  |
| O14672;A0AV88;A8MY20 ADA10_HUMAN Disintegrin and metalloproteinase domain-containing protein 10 OS=Homo sapiens GN=ADAM10 PE=1 SV=1;>tr A0AV       | 8.67E-57  |
| O14734;Q6FHI2;A6NDT2;ACOT8_HUMAN Acyl-coenzyme A thioesterase 8 OS=Homo sapiens GN=ACOT8 PE=1 SV=1;>tr Q6FHI2 Q6FHI2_HUMAN PTE1 protein            | 3.79E-13  |
| O14737;B4DE64 PDCD5_HUMAN Programmed cell death protein 5 OS=Homo sapiens GN=PDCD5 PE=1 SV=3;>tr B4DE64 B4DE64_HUMAN cDNA FLJ5                     | 2.28E-46  |
| O14745;B2R6A3;B3KSV9;NHRF1_HUMAN Na(+)/H(+) exchange regulatory cofactor NHE-RF1 OS=Homo sapiens GN=SLC9A3R1 PE=1 SV=4;>tr B2R6A3 B2R6A            | 4.26E-78  |
| O14818;O14818-2;Q8TAA PSA7_HUMAN Proteasome subunit alpha type-7 OS=Homo sapiens GN=PSMA7 PE=1 SV=1;>sp O14818-2 PSA7_HUMAN Isoform 2 of           | 0         |
| O14818;Q05DH1;O14818-PSA7_HUMAN Proteasome subunit alpha type-7 OS=Homo sapiens GN=PSMA7 PE=1 SV=1;>tr Q05DH1 Q05DH1_HUMAN Proteasome              | 6.86E-233 |
| O14828;Q6FHJ5;O14828-SCAM3_HUMAN Secretory carrier-associated membrane protein 3 OS=Homo sapiens GN=SCAMP3 PE=1 SV=3;>tr Q6FHJ5 Q6FHJ5_H           | 1.45E-08  |
| O14879;Q5T765;B4DLS7 IFIT3_HUMAN Interferon-induced protein with tetratricopeptide repeats 3 OS=Homo sapiens GN=IFIT3 PE=1 SV=1;>tr Q5T765 Q5T7    | 0         |
| O14920;O14920-2 IKKB_HUMAN Inhibitor of nuclear factor kappa-B kinase subunit beta OS=Homo sapiens GN=IKKB PE=1 SV=1;>sp O14920-2 IKKB_            | 9.45E-07  |
| O14929;Q6P594;Q8WWB5 HAT1_HUMAN Histone acetyltransferase type B catalytic subunit OS=Homo sapiens GN=HAT1 PE=1 SV=1;>tr Q6P594 Q6P594_HUMA        | 3.27E-201 |
| O14949;B7Z4A1 QCR8_HUMAN Cytochrome b-c1 complex subunit 8 OS=Homo sapiens GN=UQCRQ PE=1 SV=4;>tr B7Z4A1 B7Z4A1_HUMAN cDNA FL                      | 4.39E-24  |
| O14950;P19105 ML12B_HUMAN Myosin regulatory light chain 12B OS=Homo sapiens GN=MYL12B PE=1 SV=2;>sp P19105 ML12A_HUMAN Myosin reg                  | 0         |
| O14950;P19105;P24844 ML12B_HUMAN Myosin regulatory light chain 12B OS=Homo sapiens GN=MYL12B PE=1 SV=2;>sp P19105 ML12A_HUMAN Myosin reg           | 4.65E-286 |
| O14964;O14964-2;B4E1E HGS_HUMAN Hepatocyte growth factor-regulated tyrosine kinase substrate OS=Homo sapiens GN=HGS PE=1 SV=1;>sp O14964-2 H       | 4.81E-19  |
| O14974;O14974-4;O1497 MYPT1_HUMAN Protein phosphatase 1 regulatory subunit 12A OS=Homo sapiens GN=PPP1R12A PE=1 SV=1;>sp O14974-4 MYPT1_H          | 0         |
| O15031;A6QRH2;Q3LIB1;PLXB2_HUMAN Plexin-B2 OS=Homo sapiens GN=PLXNB2 PE=1 SV=3;>tr A6QRH2 A6QRH2_HUMAN Plexin B2 OS=Homo sapiens GN=               | 7.27E-49  |
| O15144;Q53R19;Q9BXV5 ARPC2_HUMAN Actin-related protein 2/3 complex subunit 2 OS=Homo sapiens GN=ARPC2 PE=1 SV=1;>tr Q53R19 Q53R19_HUMAN            | 1.08E-136 |
| O15155;Q53XK0;Q68DU7 BET1_HUMAN BET1 homolog OS=Homo sapiens GN=BET1 PE=1 SV=1;>tr Q53XK0 Q53XK0_HUMAN BET1 homolog (S. cerevisiae) O              | 9.48E-77  |
| O15160;O15160-2;Q96HT RPAC1_HUMAN DNA-directed RNA polymerases I and III subunit RPAC1 OS=Homo sapiens GN=POLR1C PE=1 SV=1;>sp O15160-2 R          | 3.73E-101 |
| O15162;C9J7K9;B4DTE8;PLS1_HUMAN Phospholipid scramblase 1 OS=Homo sapiens GN=PLSCR1 PE=1 SV=1;>tr C9J7K9 C9J7K9_HUMAN Phospholipid scam            | 6.83E-35  |
| O15212;Q5STK2 PFD6_HUMAN Prefoldin subunit 6 OS=Homo sapiens GN=PFDN6 PE=1 SV=1;>tr Q5STK2 Q5STK2_HUMAN Prefoldin subunit 6 OS=Ho                  | 4.00E-11  |
| O15231-3;O15231;B8K2M3 ZN185_HUMAN Isoform 3 of Zinc finger protein 185 OS=Homo sapiens GN=ZNF185;>sp O15231 ZN185_HUMAN Zinc finger protei        | 2.38E-55  |
| O15231-3;O15231;O15233 ZN185_HUMAN Isoform 3 of Zinc finger protein 185 OS=Homo sapiens GN=ZNF185;>sp O15231 ZN185_HUMAN Zinc finger proteir       | 2.41E-54  |
| O15247;A6NN85;A6PVS0;CLIC2_HUMAN Chloride intracellular channel protein 2 OS=Homo sapiens GN=CLIC2 PE=1 SV=3;>tr A6NN85 A6NN85_HUMAN Uncha         | 4.60E-15  |
| O15260;O15260-2 SURF4_HUMAN Surfeit locus protein 4 OS=Homo sapiens GN=SURF4 PE=1 SV=3;>sp O15260-2 SURF4_HUMAN Isoform 2 of Surfeit               | 4.78E-28  |
| O15269;Q6NUL7;Q59EQ4 SPTC1_HUMAN Serine palmitoyltransferase 1 OS=Homo sapiens GN=SPTLC1 PE=1 SV=1;>tr Q6NUL7 Q6NUL7_HUMAN SPTLC1 prote            | 1.39E-53  |
| O15327;D6RJC3;B7Z6T2;INP4B_HUMAN Type II inositol-3,4-bisphosphate 4-phosphatase OS=Homo sapiens GN=INPP4B PE=2 SV=4;>tr D6RJC3 D6RJC3_HUM         | 8.05E-19  |
| O15347;Q7Z684 HMGB3_HUMAN High mobility group protein B3 OS=Homo sapiens GN=HMGB3 PE=1 SV=4;>tr Q7Z684 Q7Z684_HUMAN Putative unc                   | 2.34E-27  |
| O15382;Q53EW7;B3KSI3;BCAT2_HUMAN Branched-chain-amino-acid aminotransferase, mitochondrial OS=Homo sapiens GN=BCAT2 PE=1 SV=2;>tr Q53EW7 (         | 1.66E-67  |
| O15427;Q53G91 MOT4_HUMAN Monocarboxylate transporter 4 OS=Homo sapiens GN=SLC16A3 PE=1 SV=1;>tr Q53G91 Q53G91_HUMAN Solute carri                   | 8.78E-14  |
| O15446-2;O15446 2 RPA34_HUMAN Isoform 2 of DNA-directed RNA polymerase I subunit RPA34 OS=Homo sapiens GN=CD3EAP;>sp O15446 RPA34_HI               | 1.14E-08  |
| O15511;O15511-2 ARPC5_HUMAN Actin-related protein 2/3 complex subunit 5 OS=Homo sapiens GN=ARPC5 PE=1 SV=3;>sp O15511-2 ARPC5_HUMAN                | 1.87E-14  |
| O15533-3;O15533;O15533 TPSN_HUMAN Isoform 3 of Tapasin OS=Homo sapiens GN=TAPBP;>sp O15533 TPSN_HUMAN Tapasin OS=Homo sapiens GN=TAPBI             | 1.40E-15  |
| O15540;Q9H047 FABP7_HUMAN Fatty acid-binding protein, brain OS=Homo sapiens GN=FABP7 PE=1 SV=3;>tr Q9H047 Q9H047_HUMAN Fatty acid bi               | 1.03E-152 |
| O15551;Q75L79 CLD3_HUMAN Claudin-3 OS=Homo sapiens GN=CLDN3 PE=1 SV=1;>tr Q75L79 Q75L79_HUMAN Claudin 3 OS=Homo sapiens GN=CL                      | 4.71E-11  |
| O43169;Q5HYD9 CYB5B_HUMAN Cytochrome b5 type B OS=Homo sapiens GN=CYB5B PE=1 SV=2;>tr Q5HYD9 Q5HYD9_HUMAN Putative uncharacteri                    | 1.07E-14  |
| O43175;B3KSC3;Q5SZU1;SERA_HUMAN D-3-phosphoglycerate dehydrogenase OS=Homo sapiens GN=PHGDH PE=1 SV=4;>tr B3KSC3 B3KSC3_HUMAN cDNA I               | 1.27E-164 |
| O43237;B4DZP4 DC1L2_HUMAN Cytoplasmic dynein 1 light intermediate chain 2 OS=Homo sapiens GN=DYNC1L2 PE=1 SV=1;>tr B4DZP4 B4DZP4_H                 | 1.19E-213 |
| O43242;Q6IBN0;Q8N9M2;PSMD3_HUMAN 26S proteasome non-ATPase regulatory subunit 3 OS=Homo sapiens GN=PSMD3 PE=1 SV=2;>tr Q6IBN0 Q6IBN0_HI            | 1.20E-179 |
| O43252;Q6IAX6;Q05BW9 PAPS1_HUMAN Bifunctional 3-phosphoadenosine 5-phosphosulfate synthase 1 OS=Homo sapiens GN=PAPSS1 PE=1 SV=2;>tr Q6IAX6        | 4.44E-52  |
| O43290;B4DDH9 SNUT1_HUMAN U4/U6.U5 tri-snRNP-associated protein 1 OS=Homo sapiens GN=SART1 PE=1 SV=1;>tr B4DDH9 B4DDH9_HUMAN cL                    | 1.40E-53  |
| O43301;B7Z2F7;B7Z2M8 HS12A_HUMAN Heat shock 70 kDa protein 12A OS=Homo sapiens GN=HSPA12A PE=1 SV=2;>tr B7Z2F7 B7Z2F7_HUMAN cDNA FLJ5              | 1.08E-13  |
| O43324;C9J1V9;D6RBD7;MCA3_HUMAN Eukaryotic translation elongation factor 1 epsilon-1 OS=Homo sapiens GN=EEF1E1 PE=1 SV=1;>tr C9J1V9 C9J1V9_HI      | 8.25E-56  |
| O43399-3;O43399;O43393 TPD54_HUMAN Isoform 3 of Tumor protein D54 OS=Homo sapiens GN=TPD52L2;>sp O43399 TPD54_HUMAN Tumor protein D54 O            | 1.41E-14  |
| O43402;Q53Y03;C9JB21 CX4NB_HUMAN Neighbor of COX4 OS=Homo sapiens GN=COX4NB PE=1 SV=1;>tr Q53Y03 Q53Y03_HUMAN COX4 neighbor, isoform               | 4.71E-09  |
| O43414;O43414-2;O4341 ERI3_HUMAN ERI1 exoribonuclease 3 OS=Homo sapiens GN=ERI3 PE=1 SV=2;>sp O43414-2 ERI3_HUMAN Isoform 2 of ERI1 exorib         | 6.61E-08  |
| O43427;O43427-2;Q53F5 FIBP_HUMAN Acidic fibroblast growth factor intracellular-binding protein OS=Homo sapiens GN=FIBP PE=1 SV=3;>sp O43427-2 FIBP | 1.56E-07  |
| O43447;Q6FH36;C9JQD4;PPIH_HUMAN Peptidyl-prolyl cis-trans isomerase H OS=Homo sapiens GN=PPIH PE=1 SV=1;>tr Q6FH36 Q6FH36_HUMAN Peptidyl-pr        | 1.06E-15  |
| O43464;O43464-3;O4346 HTRA2_HUMAN Serine protease HTRA2, mitochondrial OS=Homo sapiens GN=HTRA2 PE=1 SV=2;>sp O43464-3 HTRA2_HUMAN Isof            | 9.55E-10  |
| O43464;O43464-3;O4346 HTRA2_HUMAN Serine protease HTRA2, mitochondrial OS=Homo sapiens GN=HTRA2 PE=1 SV=2;>sp O43464-3 HTRA2_HUMAN Isof            | 5.87E-42  |
| O43488;C9JSL3 ARK72_HUMAN Aflatoxin B1 aldehyde reductase member 2 OS=Homo sapiens GN=AKR7A2 PE=1 SV=3;>tr C9JSL3 C9JSL3_HUMAN L                   | 1.04E-68  |
| O43488;Q8NHP1 ARK72_HUMAN Aflatoxin B1 aldehyde reductase member 2 OS=Homo sapiens GN=AKR7A2 PE=1 SV=3;>sp Q8NHP1 ARK74_HUMAN                      | 1.75E-66  |
| O43491;Q68DV2;Q59FD8;E41L2_HUMAN Band 4.1-like protein 2 OS=Homo sapiens GN=EPB41L2 PE=1 SV=1;>tr Q68DV2 Q68DV2_HUMAN Putative uncharact           | 3.49E-58  |
| O43598;A8MXA0 RCL_HUMAN Deoxyribonucleoside 5-monophosphate N-glycosidase OS=Homo sapiens GN=RCL PE=1 SV=1;>tr A8MXA0 A8MXA0_HU                    | 8.14E-30  |
| O43598;O43598-2 RCL_HUMAN Deoxyribonucleoside 5-monophosphate N-glycosidase OS=Homo sapiens GN=RCL PE=1 SV=1;>sp O43598-2 RCL_HUM                  | 2.53E-31  |
| O43670;O43670-2;O4367 ZN207_HUMAN Zinc finger protein 207 OS=Homo sapiens GN=ZNF207 PE=1 SV=1;>sp O43670-2 ZN207_HUMAN Isoform 2 of Zinc f         | 1.20E-07  |

O43676;Q6IB80;C9JKQ2 NDUB3\_HUMAN NADH dehydrogenase [ubiquinone] 1 beta subcomplex subunit 3 OS=Homo sapiens GN=NDUFB3 PE=1 SV=3;>tr|Q6I 2.44E-09  
O43681;B4DEE5 ASNA\_HUMAN ATPase ASNA1 OS=Homo sapiens GN=ASNA1 PE=1 SV=2;>tr|B4DEE5|B4DEE5\_HUMAN cDNA FLJ60230, highly similar 2.79E-79  
O43707;D6PXX4;Q96BG6;ACTN4\_HUMAN Alpha-actinin-4 OS=Homo sapiens GN=ACTN4 PE=1 SV=2;>tr|D6PXX4|D6PXX4\_HUMAN Alpha actinin 4 short isoform 0  
O43776;B4DN60;B4DGT6 SYNC\_HUMAN Asparaginyl-tRNA synthetase, cytoplasmic OS=Homo sapiens GN=NARS PE=1 SV=1;>tr|B4DN60|B4DN60\_HUMAN cDN 1.51E-204  
O43815;Q3B874;O43815- STRN\_HUMAN Striatin OS=Homo sapiens GN=STRN PE=1 SV=4;>tr|Q3B874|Q3B874\_HUMAN STRN protein (Fragment) OS=Homo sa 5.85E-17  
O43823;Q8NE02;Q9UG73 AKAP8\_HUMAN A-kinase anchor protein 8 OS=Homo sapiens GN=AKAP8 PE=1 SV=1;>tr|Q8NE02|Q8NE02\_HUMAN AKAP8 protein OS 1.42E-52  
O43837;O43837-2;O4383 IDH3B\_HUMAN Isocitrate dehydrogenase [NAD] subunit beta, mitochondrial OS=Homo sapiens GN=IDH3B PE=1 SV=2;>sp|O43837-2 3.56E-161  
O43865;O43865-2;Q96HN SAHH2\_HUMAN Putative adenosylhomocysteinase 2 OS=Homo sapiens GN=AHCYL1 PE=1 SV=2;>sp|O43865-2|SAHH2\_HUMAN Isofo 1.96E-10  
O43920;Q6IBA0 NDUS5\_HUMAN NADH dehydrogenase [ubiquinone] iron-sulfur protein 5 OS=Homo sapiens GN=NDUFS5 PE=1 SV=3;>tr|Q6IBA0|Q6I 5.80E-11  
O43924;Q6IB24;C9IZ52;EPDE6D\_HUMAN Retinal rod rhodopsin-sensitive cGMP 3,5-cyclic phosphodiesterase subunit delta OS=Homo sapiens GN=PDE6D PE=1 : 2.75E-08  
O60234;Q6IB37;Q8TDZ6 GMFG\_HUMAN Glia maturation factor gamma OS=Homo sapiens GN=GMFG PE=1 SV=1;>tr|Q6IB37|Q6IB37\_HUMAN GMFG protein O: 1.26E-28  
O60264;B4DZC0;B7ZAX9;SMCA5\_HUMAN SWI/SNF-related matrix-associated actin-dependent regulator of chromatin subfamily A member 5 OS=Homo sapiens 1.10E-14  
O60313-2;O60313 2|OPA1\_HUMAN Isoform 2 of Dynamin-like 120 kDa protein, mitochondrial OS=Homo sapiens GN=OPA1;>sp|O60313|OPA1\_HUMAN I 4.60E-29  
O60493;O60493-4;O6049 SNX3\_HUMAN Sorting nexin-3 OS=Homo sapiens GN=SNX3 PE=1 SV=3;>sp|O60493-4|SNX3\_HUMAN Isoform 4 of Sorting nexin-3 O 1.25E-32  
O60499;Q5U8S2;O60499-STX10\_HUMAN Syntaxin-10 OS=Homo sapiens GN=STX10 PE=1 SV=1;>tr|Q5U8S2|Q5U8S2\_HUMAN Syntaxin 10 OS=Homo sapiens 8.15E-16  
O60502;O60502-2;O6050 NCOAT\_HUMAN Bifunctional protein NCOAT OS=Homo sapiens GN=MGEA5 PE=1 SV=2;>sp|O60502-2|NCOAT\_HUMAN Isoform 2 of B 1.98E-52  
O60506;O60506-2;O6050 HNRPQ\_HUMAN Heterogeneous nuclear ribonucleoprotein Q OS=Homo sapiens GN=SYNCRIP PE=1 SV=2;>sp|O60506-2|HNRPQ\_HUM 1.20E-255  
O60506;O60506-3;O6050 HNRPQ\_HUMAN Heterogeneous nuclear ribonucleoprotein Q OS=Homo sapiens GN=SYNCRIP PE=1 SV=2;>sp|O60506-3|HNRPQ\_HUM 0  
O60568;B3KQQ3;Q9UG85 PLOD3\_HUMAN Procollagen-lysine,2-oxoglutarate 5-dioxygenase 3 OS=Homo sapiens GN=PLOD3 PE=1 SV=1;>tr|B3KQQ3|B3KQQ3\_ 3.92E-67  
O60573;Q53RG0;Q59FE1;IF4E2\_HUMAN Eukaryotic translation initiation factor 4E type 2 OS=Homo sapiens GN=EIF4E2 PE=1 SV=1;>tr|Q53RG0|Q53RG0\_HUM 6.03E-07  
O60610;Q6URC4;Q17RN4 DIAP1\_HUMAN Protein diaphanous homolog 1 OS=Homo sapiens GN=DIAPH1 PE=1 SV=2;>tr|Q6URC4|Q6URC4\_HUMAN Diaphanous 1.00E-146  
O60664;O60664-3;O6066 PLIN3\_HUMAN Perilipin-3 OS=Homo sapiens GN=PLIN3 PE=1 SV=3;>sp|O60664-3|PLIN3\_HUMAN Isoform 3 of Perilipin-3 OS=Homo 8.17E-128  
O60684;O15131 IMA7\_HUMAN Importin subunit alpha-7 OS=Homo sapiens GN=KPNA6 PE=1 SV=1;>sp|O15131|IMA5\_HUMAN Importin subunit alpha 1.50E-55  
O60701;B3KUU2;B4DN25 UGDH\_HUMAN UDP-glucose 6-dehydrogenase OS=Homo sapiens GN=UGDH PE=1 SV=1;>tr|B3KUU2|B3KUU2\_HUMAN UDP-glucose c 0  
O60716;O60716-2;O6071 CTND1\_HUMAN Catenin delta-1 OS=Homo sapiens GN=CTNND1 PE=1 SV=1;>sp|O60716-2|CTND1\_HUMAN Isoform 1AB of Catenin c 6.77E-20  
O60739;Q53F41;Q6FG85 EIF1B\_HUMAN Eukaryotic translation initiation factor 1b OS=Homo sapiens GN=EIF1B PE=1 SV=2;>tr|Q53F41|Q53F41\_HUMAN Trans 5.05E-51  
O60783;B2R4A5 RT14\_HUMAN 28S ribosomal protein S14, mitochondrial OS=Homo sapiens GN=MRPS14 PE=1 SV=1;>tr|B2R4A5|B2R4A5\_HUMAN cD 3.15E-38  
O60784-2;O60784;O6078 2|TOM1\_HUMAN Isoform 2 of Target of Myb protein 1 OS=Homo sapiens GN=TOM1;>sp|O60784|TOM1\_HUMAN Target of Myb protein 1.07E-22  
O60814;P57053;P58876;FH2B1K\_HUMAN Histone H2B type 1-K OS=Homo sapiens GN=HIST1H2BK PE=1 SV=3;>sp|P57053|H2BFS\_HUMAN Histone H2B type I 3.24E-39  
O60814;P58876;P62807;CH2B1K\_HUMAN Histone H2B type 1-K OS=Homo sapiens GN=HIST1H2BK PE=1 SV=3;>sp|P58876|H2B1D\_HUMAN Histone H2B type 7.52E-137  
O60825;O60825-2 F262\_HUMAN 6-phosphofructo-2-kinase/fructose-2,6-biphosphatase 2 OS=Homo sapiens GN=PFKFB2 PE=1 SV=2;>sp|O60825-2|F26 6.17E-10  
O60826;B4DPB6;B7ZAR0;CCD22\_HUMAN Coiled-coil domain-containing protein 22 OS=Homo sapiens GN=CCDC22 PE=1 SV=1;>tr|B4DPB6|B4DPB6\_HUMAN cl 3.46E-10  
O60841;Q8N5A0;D3DVI5;IF2P\_HUMAN Eukaryotic translation initiation factor 5B OS=Homo sapiens GN=EIF5B PE=1 SV=4;>tr|Q8N5A0|Q8N5A0\_HUMAN Eukar 3.56E-60  
O60885;Q4G0X8;O60885-BRD4\_HUMAN Bromodomain-containing protein 4 OS=Homo sapiens GN=BRD4 PE=1 SV=2;>tr|Q4G0X8|Q4G0X8\_HUMAN BRD4 prote 5.96E-15  
O60888-2;O60888;O6088 2|CUTA\_HUMAN Isoform A of Protein CutA OS=Homo sapiens GN=CUTA;>sp|O60888|CUTA\_HUMAN Protein CutA OS=Homo sapiens C 4.05E-30  
O75084;Q14332 FZD7\_HUMAN Frizzled-7 OS=Homo sapiens GN=FZD7 PE=2 SV=2;>sp|Q14332|FZD2\_HUMAN Frizzled-2 OS=Homo sapiens GN=FZD2 0.0001056  
O75116;B4DRJ9;Q14DU5 ROCK2\_HUMAN Rho-associated protein kinase 2 OS=Homo sapiens GN=ROCK2 PE=1 SV=4;>tr|B4DRJ9|B4DRJ9\_HUMAN cDNA FLJ51 2.80E-104  
O75131;Q05DL8 CPNE3\_HUMAN Copine-3 OS=Homo sapiens GN=CPNE3 PE=1 SV=1;>tr|Q05DL8|Q05DL8\_HUMAN CPNE3 protein (Fragment) OS=Hor 2.24E-153  
O75146;Q6NXG8;B3KQW6;HIP1R\_HUMAN Huntingtin-interacting protein 1-related protein OS=Homo sapiens GN=HIP1R PE=1 SV=2;>tr|Q6NXG8|Q6NXG8\_HUM 1.71E-12  
O75150;O75150-3;O7515 BRE1B\_HUMAN E3 ubiquitin-protein ligase BRE1B OS=Homo sapiens GN=RNFB40 PE=1 SV=4;>sp|O75150-3|BRE1B\_HUMAN Isoform 3 1.10E-10  
O75150;O75150-4;O7515 BRE1B\_HUMAN E3 ubiquitin-protein ligase BRE1B OS=Homo sapiens GN=RNFB40 PE=1 SV=4;>sp|O75150-4|BRE1B\_HUMAN Isoform 4 4.63E-14  
O75175;O75175-2 CNOT3\_HUMAN CCR4-NOT transcription complex subunit 3 OS=Homo sapiens GN=CNOT3 PE=1 SV=1;>sp|O75175-2|CNOT3\_HUMAN 8.39E-20  
O75179;O75179-2;O7517 ANR17\_HUMAN Ankyrin repeat domain-containing protein 17 OS=Homo sapiens GN=ANKRD17 PE=1 SV=3;>sp|O75179-2|ANR17\_HL 6.87E-23  
O75179;O75179-2;Q8IYW ANR17\_HUMAN Ankyrin repeat domain-containing protein 17 OS=Homo sapiens GN=ANKRD17 PE=1 SV=3;>sp|O75179-2|ANR17\_HL 2.42E-157  
O75182;O75182-2;O7518 SIN3B\_HUMAN Paired amphipathic helix protein Sin3b OS=Homo sapiens GN=SIN3B PE=1 SV=2;>sp|O75182-2|SIN3B\_HUMAN Isofo 5.17E-06  
O75208;B4DIV2;B4E0U3;COQ9\_HUMAN Ubiquinone biosynthesis protein COQ9, mitochondrial OS=Homo sapiens GN=COQ9 PE=1 SV=1;>tr|B4DIV2|B4DIV2\_H 1.11E-07  
O75223;B3KMN7;B8ZZK2;GGCT\_HUMAN Gamma-glutamylcyclotransferase OS=Homo sapiens GN=GGCT PE=1 SV=1;>tr|B3KMN7|B3KMN7\_HUMAN cDNA FLJ11 9.71E-141  
O75312;B4DVT8 ZPR1\_HUMAN Zinc finger protein ZPR1 OS=Homo sapiens GN=ZNF259 PE=1 SV=1;>tr|B4DVT8|B4DVT8\_HUMAN cDNA FLJ60173, hig 1.09E-39  
O75323;C9IYJ3 NIPS2\_HUMAN Protein NipSnap homolog 2 OS=Homo sapiens GN=GBAS PE=1 SV=1;>tr|C9IYJ3|C9IYJ3\_HUMAN Glioblastoma amplifi 3.67E-17  
O75340;Q53FC3;Q2YDC2 PDCD6\_HUMAN Programmed cell death protein 6 OS=Homo sapiens GN=PDCD6 PE=1 SV=1;>tr|Q53FC3|Q53FC3\_HUMAN Programme 1.54E-11  
O75347;Q6FGD7;B4DT30 TBCA\_HUMAN Tubulin-specific chaperone A OS=Homo sapiens GN=TBCA PE=1 SV=3;>tr|Q6FGD7|Q6FGD7\_HUMAN TBCA protein OS= 1.25E-59  
O75348;O95670 VATG1\_HUMAN V-type proton ATPase subunit G 1 OS=Homo sapiens GN=ATP6V1G1 PE=1 SV=3;>sp|O95670|VATG2\_HUMAN V-type 4.27E-62  
O75348;Q6IB33;C9JRT2;VATG1\_HUMAN V-type proton ATPase subunit G 1 OS=Homo sapiens GN=ATP6V1G1 PE=1 SV=3;>tr|Q6IB33|Q6IB33\_HUMAN ATP6V1 1.11E-68  
O75367;O75367-3;O7536 H2AY\_HUMAN Core histone macro-H2A.1 OS=Homo sapiens GN=H2AFY PE=1 SV=4;>sp|O75367-3|H2AY\_HUMAN Isoform 3 of Core h 4.19E-165  
O75368;D3DTE6 SH3L1\_HUMAN SH3 domain-binding glutamic acid-rich-like protein OS=Homo sapiens GN=SH3BGR1 PE=1 SV=1;>tr|D3DTE6|D3DTE6 5.16E-190  
O75369;Q60FE7;O75369- FLNB\_HUMAN Filamin-B OS=Homo sapiens GN=FLNB PE=1 SV=2;>tr|Q60FE7|Q60FE7\_HUMAN Filamin B OS=Homo sapiens GN=FLNI 0  
O75379;Q6IAZ3;O75379- VAMP4\_HUMAN Vesicle-associated membrane protein 4 OS=Homo sapiens GN=VAMP4 PE=1 SV=2;>tr|Q6IAZ3|Q6IAZ3\_HUMAN VAMF 5.64E-19  
O75380;Q6IBC4;D6RBT3 NDUS6\_HUMAN NADH dehydrogenase [ubiquinone] iron-sulfur protein 6, mitochondrial OS=Homo sapiens GN=NDUFS6 PE=1 SV=1;> 3.91E-08  
O75381;O75381-2;B7Z4Z PEX14\_HUMAN Peroxisomal membrane protein PEX14 OS=Homo sapiens GN=PEX14 PE=1 SV=1;>sp|O75381-2|PEX14\_HUMAN Isofo 1.32E-25  
O75390;B4DJV2;B3KTN4 CISO\_HUMAN Citrate synthase, mitochondrial OS=Homo sapiens GN=CS PE=1 SV=2;>tr|B4DJV2|B4DJV2\_HUMAN Citrate synthase O: 1.47E-43  
O75400;O75400-2;O7540 PR40A\_HUMAN Pre-mRNA-processing factor 40 homolog A OS=Homo sapiens GN=PRPF40A PE=1 SV=2;>sp|O75400-2|PR40A\_HUMA 8.17E-110



O75400;O75400-3;O7540 PR40A\_HUMAN Pre-mRNA-processing factor 40 homolog A OS=Homo sapiens GN=PRPF40A PE=1 SV=2;>sp|O75400-3|PR40A\_HUMA 1.53E-45  
 O75410-2;O75410;O7541 2|TACC1\_HUMAN Isoform 2 of Transforming acidic coiled-coil-containing protein 1 OS=Homo sapiens GN=TACC1;>sp|O75410|TACC1\_ 1.52E-10  
 O75414;C9J9V6;C9JQB1 NDK6\_HUMAN Nucleoside diphosphate kinase 6 OS=Homo sapiens GN=NME6 PE=1 SV=3;>tr|C9J9V6|C9J9V6\_HUMAN Nucleoside dip 4.89E-05  
 O75436;B4DLT1;A8MZ56; VP26A\_HUMAN Vacuolar protein sorting-associated protein 26A OS=Homo sapiens GN=VPS26A PE=1 SV=2;>tr|B4DLT1|B4DLT1\_HUM 6.98E-62  
 O75477;O94905-3;O9490 ERLN1\_HUMAN Erlin-1 OS=Homo sapiens GN=ERLN1 PE=1 SV=1;>sp|O94905-3|ERLN2\_HUMAN Isoform 3 of Erlin-2 OS=Homo sapi 7.46E-18  
 O75487;Q86SV6;B4E2C0 GPC4\_HUMAN Glypican-4 OS=Homo sapiens GN=GPC4 PE=1 SV=4;>tr|Q86SV6|Q86SV6\_HUMAN K-glypican OS=Homo sapiens GN=( 3.10E-10  
 O75489;Q53FM7;Q9UF24;NDUS3\_HUMAN NADH dehydrogenase [ubiquinone] iron-sulfur protein 3, mitochondrial OS=Homo sapiens GN=NDUFS3 PE=1 SV=1;> 1.22E-26  
 O75494;Q53GD7;O75494 SRS10\_HUMAN Serine/arginine-rich splicing factor 10 OS=Homo sapiens GN=SRSF10 PE=1 SV=1;>tr|Q53GD7|Q53GD7\_HUMAN FUS 9.18E-08  
 O75526;Q8N7X1 HNRGT\_HUMAN RNA-binding motif protein, X-linked-like-2 OS=Homo sapiens GN=RBMXL2 PE=1 SV=3;>sp|Q8N7X1|RMXL3\_HUMAN | 1.96E-40  
 O75531;B2R4V4 BAF\_HUMAN Barrier-to-autointegration factor OS=Homo sapiens GN=BANF1 PE=1 SV=1;>tr|B2R4V4|B2R4V4\_HUMAN cDNA, FLJ9223 5.84E-72  
 O75533;Q7Z497 SF3B1\_HUMAN Splicing factor 3B subunit 1 OS=Homo sapiens GN=SF3B1 PE=1 SV=3;>tr|Q7Z497|Q7Z497\_HUMAN SF3B1 protein (F 5.04E-67  
 O75534;O75534-2;Q9GZV CSDE1\_HUMAN Cold shock domain-containing protein E1 OS=Homo sapiens GN=CSDE1 PE=1 SV=2;>sp|O75534-2|CSDE1\_HUMAN I: 3.81E-97  
 O75581;B7ZLD0;Q59EX8; LRP6\_HUMAN Low-density lipoprotein receptor-related protein 6 OS=Homo sapiens GN=LRP6 PE=1 SV=2;>tr|B7ZLD0|B7ZLD0\_HUMA 2.38E-06  
 O75676;O75676-2;A0PJFE KS6A4\_HUMAN Ribosomal protein S6 kinase alpha-4 OS=Homo sapiens GN=RPS6KA4 PE=1 SV=1;>sp|O75676-2|KS6A4\_HUMAN Isof 1.46E-18  
 O75694;O75694-2 NU155\_HUMAN Nuclear pore complex protein Nup155 OS=Homo sapiens GN=NUP155 PE=1 SV=1;>sp|O75694-2|NU155\_HUMAN Iso 1.04E-131  
 O75787;B7Z4S4;B7Z9I3;f RENR\_HUMAN Renin receptor OS=Homo sapiens GN=ATP6AP2 PE=1 SV=2;>tr|B7Z4S4|B7Z4S4\_HUMAN cDNA FLJ52567, highly simil 1.41E-16  
 O75792;Q6IBG3;Q6UQL6 RNH2A\_HUMAN Ribonuclease H2 subunit A OS=Homo sapiens GN=RNASEH2A PE=1 SV=2;>tr|Q6IBG3|Q6IBG3\_HUMAN Ribonuclease 7.42E-46  
 O75818;O75818-2;Q5VX9 RPP40\_HUMAN Ribonuclease P protein subunit p40 OS=Homo sapiens GN=RPP40 PE=1 SV=3;>sp|O75818-2|RPP40\_HUMAN Isoform 2.04E-10  
 O75821;Q6IAM0;A8K5K5 EIF3G\_HUMAN Eukaryotic translation initiation factor 3 subunit G OS=Homo sapiens GN=EIF3G PE=1 SV=2;>tr|Q6IAM0|Q6IAM0\_HUI 4.87E-120  
 O75822;B4DUI3 EIF3J\_HUMAN Eukaryotic translation initiation factor 3 subunit J OS=Homo sapiens GN=EIF3J PE=1 SV=2;>tr|B4DUI3|B4DUI3\_HUMA 4.37E-49  
 O75828;Q53F60 CBR3\_HUMAN Carbonyl reductase [NADPH] 3 OS=Homo sapiens GN=CBR3 PE=1 SV=3;>tr|Q53F60|Q53F60\_HUMAN Carbonyl reduct 4.19E-58  
 O75832;Q5U0B2;B1AJY7; PSD10\_HUMAN 26S proteasome non-ATPase regulatory subunit 10 OS=Homo sapiens GN=PSMD10 PE=1 SV=1;>tr|Q5U0B2|Q5U0B2\_ 3.16E-34  
 O75909-4;O75909;O7590 4|CCNK\_HUMAN Isoform 4 of Cyclin-K OS=Homo sapiens GN=CCNK;>sp|O75909|CCNK\_HUMAN Cyclin-K OS=Homo sapiens GN=CCN 7.93E-10  
 O75935;O75935-3;O7593 DCTN3\_HUMAN Dynactin subunit 3 OS=Homo sapiens GN=DCTN3 PE=1 SV=1;>sp|O75935-3|DCTN3\_HUMAN Isoform 3 of Dynactin s 2.38E-18  
 O75947;O75947-2;A0PJH ATP5H\_HUMAN ATP synthase subunit d, mitochondrial OS=Homo sapiens GN=ATP5H PE=1 SV=3;>sp|O75947-2|ATP5H\_HUMAN Isofo 4.71E-75  
 O75955;Q53HQ0;Q5ST80; FLOT1\_HUMAN Flotillin-1 OS=Homo sapiens GN=FLOT1 PE=1 SV=3;>tr|Q53HQ0|Q53HQ0\_HUMAN Flotillin 1 variant (Fragment) OS=f 5.49E-62  
 O75962;O75962-4;O7596 TRIO\_HUMAN Triple functional domain protein OS=Homo sapiens GN=TRIO PE=1 SV=2;>sp|O75962-4|TRIO\_HUMAN Isoform 4 of Tri 2.54E-11  
 O75962;O75962-4;O7596 TRIO\_HUMAN Triple functional domain protein OS=Homo sapiens GN=TRIO PE=1 SV=2;>sp|O75962-4|TRIO\_HUMAN Isoform 4 of Tri 1.08E-42  
 O75976;B7Z7T9;B7ZAU4; CBPD\_HUMAN Carboxypeptidase D OS=Homo sapiens GN=CPD PE=1 SV=2;>tr|B7Z7T9|B7Z7T9\_HUMAN cDNA FLJ50395, highly simi 1.09E-44  
 O76031;Q9H072 CLPX\_HUMAN ATP-dependent Clp protease ATP-binding subunit clpX-like, mitochondrial OS=Homo sapiens GN=CLPX PE=1 SV=2;>tr| 8.08E-13  
 O76070;Q6FHG5;A9XXE1 SYUG\_HUMAN Gamma-synuclein OS=Homo sapiens GN=SNCG PE=1 SV=2;>tr|Q6FHG5|Q6FHG5\_HUMAN SNCG protein OS=Homo sa 3.69E-176  
 O76071;B4DRZ6;B2RDJ6 CIAO1\_HUMAN Probable cytosolic iron-sulfur protein assembly protein CIAO1 OS=Homo sapiens GN=CIAO1 PE=1 SV=1;>tr|B4DRZ6| 6.05E-35  
 O76094;Q71V07;A0PJJ5;f SRP72\_HUMAN Signal recognition particle 72 kDa protein OS=Homo sapiens GN=SRP72 PE=1 SV=3;>tr|Q71V07|Q71V07\_HUMAN Pu 0  
 O94763;Q6NX55;O94763- RMP\_HUMAN Unconventional prefoldin RPB5 interactor OS=Homo sapiens GN=RMP PE=1 SV=3;>tr|Q6NX55|Q6NX55\_HUMAN Chromc 1.07E-08  
 O94776;Q68DB1 MTA2\_HUMAN Metastasis-associated protein MTA2 OS=Homo sapiens GN=MTA2 PE=1 SV=1;>tr|Q68DB1|Q68DB1\_HUMAN Putative u 1.30E-193  
 O94832;Q7Z3N6 MYO1D\_HUMAN Myosin-Id OS=Homo sapiens GN=MYO1D PE=1 SV=2;>tr|Q7Z3N6|Q7Z3N6\_HUMAN Putative uncharacterized protein 1.66E-22  
 O94855-2;O94855 2|SC24D\_HUMAN Isoform 2 of Protein transport protein Sec24D OS=Homo sapiens GN=SEC24D;>sp|O94855|SC24D\_HUMAN Protein 3.74E-10  
 O94874;O94874-2;O9487 UFL1\_HUMAN E3 UFM1-protein ligase 1 OS=Homo sapiens GN=KIAA0776 PE=1 SV=2;>sp|O94874-2|UFL1\_HUMAN Isoform 2 of E3 U 5.54E-28  
 O94925-3;O94925 3|GLSK\_HUMAN Isoform 3 of Glutaminase kidney isoform, mitochondrial OS=Homo sapiens GN=GLS;>sp|O94925|GLSK\_HUMAN Glut 7.41E-28  
 O94973-2;O94973;O9497 2|AP2A2\_HUMAN Isoform 2 of AP-2 complex subunit alpha-2 OS=Homo sapiens GN=AP2A2;>sp|O94973|AP2A2\_HUMAN AP-2 comple 6.27E-27  
 O95155;O95155-2;O9515 UBE4B\_HUMAN Ubiquitin conjugation factor E4 B OS=Homo sapiens GN=UBE4B PE=1 SV=1;>sp|O95155-2|UBE4B\_HUMAN Isoform 2 9.07E-17  
 O95168;B2RUY3;C9JXQ9 NDUB4\_HUMAN NADH dehydrogenase [ubiquinone] 1 beta subcomplex subunit 4 OS=Homo sapiens GN=NDUFB4 PE=1 SV=3;>tr|B2F 1.17E-25  
 O95169;Q5W143;Q5W14 NDUB8\_HUMAN NADH dehydrogenase [ubiquinone] 1 beta subcomplex subunit 8, mitochondrial OS=Homo sapiens GN=NDUFB8 PE=1 3.26E-12  
 O95229;A6NNV6;B4DP12; ZWINT\_HUMAN ZW10 interactor OS=Homo sapiens GN=ZWINT PE=1 SV=2;>tr|A6NNV6|A6NNV6\_HUMAN Uncharacterized protein OS 1.36E-07  
 O95239;O95239-2;Q2VIQ KIF4A\_HUMAN Chromosome-associated kinesin KIF4A OS=Homo sapiens GN=KIF4A PE=1 SV=3;>sp|O95239-2|KIF4A\_HUMAN Isofor 6.26E-31  
 O95297;O95297-2;O9529 MPZL1\_HUMAN Myelin protein zero-like protein 1 OS=Homo sapiens GN=MPZL1 PE=1 SV=1;>sp|O95297-2|MPZL1\_HUMAN Isoform 2 0.00012997  
 O95298;Q549M5 NDUC2\_HUMAN NADH dehydrogenase [ubiquinone] 1 subunit C2 OS=Homo sapiens GN=NDUFC2 PE=1 SV=1;>tr|Q549M5|Q549M5\_f 8.47E-06  
 O95340-2;O95340;Q5TB5 2|PAPS2\_HUMAN Isoform B of Bifunctional 3-phosphoadenosine 5-phosphosulfate synthase 2 OS=Homo sapiens GN=PAPSS2;>sp|O9 9.55E-88  
 O95372;Q5QPQ2;Q5QPQ3 LYPA2\_HUMAN Acyl-protein thioesterase 2 OS=Homo sapiens GN=LYPLA2 PE=1 SV=1;>tr|Q5QPQ2|Q5QPQ2\_HUMAN Lysophospholipa 2.12E-16  
 O95373;B3KQG6 IPO7\_HUMAN Importin-7 OS=Homo sapiens GN=IPO7 PE=1 SV=1;>tr|B3KQG6|B3KQG6\_HUMAN cDNA FLJ90427 fis, clone NT2RP30C 8.31E-130  
 O95433;B4DUR9 AHSA1\_HUMAN Activator of 90 kDa heat shock protein ATPase homolog 1 OS=Homo sapiens GN=AHSA1 PE=1 SV=1;>tr|B4DUR9|B4I 1.86E-43  
 O95445;Q5SRP5;Q5SRP4 APOM\_HUMAN Apolipoprotein M OS=Homo sapiens GN=APOM PE=1 SV=2;>tr|Q5SRP5|Q5SRP5\_HUMAN Apolipoprotein M OS=Homo : 6.92E-07  
 O95466-2;O95466;D2DGV 2|FMNL\_HUMAN Isoform 2 of Formin-like protein 1 OS=Homo sapiens GN=FMNL1;>sp|O95466|FMNL\_HUMAN Formin-like protein 1 O 3.34E-08  
 O95478;Q5J7U2 NSA2\_HUMAN Ribosome biogenesis protein NSA2 homolog OS=Homo sapiens GN=NSA2 PE=1 SV=1;>tr|Q5J7U2|Q5J7U2\_HUMAN TG 1.08E-07  
 O95486;B4E205 SC24A\_HUMAN Protein transport protein Sec24A OS=Homo sapiens GN=SEC24A PE=1 SV=2;>tr|B4E205|B4E205\_HUMAN cDNA FLJ6 5.02E-30  
 O95486;O95486-2 SC24A\_HUMAN Protein transport protein Sec24A OS=Homo sapiens GN=SEC24A PE=1 SV=2;>sp|O95486-2|SC24A\_HUMAN Isoform 9.65E-13  
 O95571;B2RCZ7 ETHE1\_HUMAN Protein ETHE1, mitochondrial OS=Homo sapiens GN=ETHE1 PE=1 SV=2;>tr|B2RCZ7|B2RCZ7\_HUMAN Ethylmalonic ei 4.72E-16  
 O95721;C9JAF7 SNP29\_HUMAN Synaptosomal-associated protein 29 OS=Homo sapiens GN=SNAP29 PE=1 SV=1;>tr|C9JAF7|C9JAF7\_HUMAN Synaptc 2.69E-27  
 O95747;C9JIG9 OXSR1\_HUMAN Serine/threonine-protein kinase OSR1 OS=Homo sapiens GN=OXSR1 PE=1 SV=1;>tr|C9JIG9|C9JIG9\_HUMAN Unchar 6.71E-133  
 O95749;C9J7M1;C9J6G3 GGPPS\_HUMAN Geranylgeranyl pyrophosphate synthase OS=Homo sapiens GN=GGPS1 PE=1 SV=1;>tr|C9J7M1|C9J7M1\_HUMAN Unc 2.31E-18  
 O95782;O95782-2;Q8N9K AP2A1\_HUMAN AP-2 complex subunit alpha-1 OS=Homo sapiens GN=AP2A1 PE=1 SV=3;>sp|O95782-2|AP2A1\_HUMAN Isoform B of 8.72E-106



O95786;O95786-2;B3KWL DDX58\_HUMAN Probable ATP-dependent RNA helicase DDX58 OS=Homo sapiens GN=DDX58 PE=1 SV=2;>sp|O95786-2|DDX58\_HUM 2.61E-85  
 O95817;Q53GY1;C9JFK9 BAG3\_HUMAN BAG family molecular chaperone regulator 3 OS=Homo sapiens GN=BAG3 PE=1 SV=3;>tr|Q53GY1|Q53GY1\_HUMAN B 3.29E-09  
 O95825;A6NMA8;A6NHJ8;QORL1\_HUMAN Quinone oxidoreductase-like protein 1 OS=Homo sapiens GN=CRYZL1 PE=1 SV=2;>tr|A6NMA8|A6NMA8\_HUMAN Unc 1.66E-12  
 O95831;O95831-3;O9583 AIFM1\_HUMAN Apoptosis-inducing factor 1, mitochondrial OS=Homo sapiens GN=AIFM1 PE=1 SV=1;>sp|O95831-3|AIFM1\_HUMAN I: 8.36E-63  
 O95833;Q6FGP1;Q5SQ17 CLIC3\_HUMAN Chloride intracellular channel protein 3 OS=Homo sapiens GN=CLIC3 PE=1 SV=2;>tr|Q6FGP1|Q6FGP1\_HUMAN CLIC3 1.56E-22  
 O95861-2;O95861 2|BPNT1\_HUMAN Isoform 2 of 3(2),5-bisphosphate nucleotidase 1 OS=Homo sapiens GN=BPNT1;>sp|O95861|BPNT1\_HUMAN 3(2),5- 9.31E-15  
 O95864;O95864-3;O9586 FADS2\_HUMAN Fatty acid desaturase 2 OS=Homo sapiens GN=FADS2 PE=1 SV=1;>sp|O95864-3|FADS2\_HUMAN Isoform 3 of Fatty a 2.12E-09  
 O95865;Q5SRR8;Q5SSV3;DDAH2\_HUMAN N(G),N(G)-dimethylarginine dimethylaminohydrolase 2 OS=Homo sapiens GN=DDAH2 PE=1 SV=1;>tr|Q5SRR8|Q5SF 1.41E-112  
 O95999;Q5VUF1;A2TDT2 BCL10\_HUMAN B-cell lymphoma/leukemia 10 OS=Homo sapiens GN=BCL10 PE=1 SV=1;>tr|Q5VUF1|Q5VUF1\_HUMAN B-cell CLL/lym 2.40E-16  
 O96011;B4DXH9 PX11B\_HUMAN Peroxisomal membrane protein 11B OS=Homo sapiens GN=PEX11B PE=1 SV=1;>tr|B4DXH9|B4DXH9\_HUMAN cDNA F 7.08E-05  
 O96013;O96013-4;O9601 PAK4\_HUMAN Serine/threonine-protein kinase PAK 4 OS=Homo sapiens GN=PAK4 PE=1 SV=1;>sp|O96013-4|PAK4\_HUMAN Isoform 4.30E-06  
 O96019;Q53FS0;Q6F197;I ACL6A\_HUMAN Actin-like protein 6A OS=Homo sapiens GN=ACTL6A PE=1 SV=1;>tr|Q53FS0|Q53FS0\_HUMAN Actin-like 6A isoform 1 6.98E-63  
 P00167;Q59F44;P00167-2 CYB5\_HUMAN Cytochrome b5 OS=Homo sapiens GN=CYB5A PE=1 SV=2;>tr|Q59F44|Q59F44\_HUMAN Cytochrome b-5 isoform 1 vari 3.04E-31  
 P00325;P07327 ADH1B\_HUMAN Alcohol dehydrogenase 1B OS=Homo sapiens GN=ADH1B PE=1 SV=2;>sp|P07327|ADH1A\_HUMAN Alcohol dehydrog 1.13E-254  
 P00352;B4DDF8;B4DXX3;AL1A1\_HUMAN Retinal dehydrogenase 1 OS=Homo sapiens GN=ALDH1A1 PE=1 SV=2;>tr|B4DDF8|B4DDF8\_HUMAN cDNA FLJ51786, 0  
 P00367;B4DMF5;Q53GW3 DHE3\_HUMAN Glutamate dehydrogenase 1, mitochondrial OS=Homo sapiens GN=GLUD1 PE=1 SV=2;>tr|B4DMF5|B4DMF5\_HUMAN c 4.12E-258  
 P00367;P49448 DHE3\_HUMAN Glutamate dehydrogenase 1, mitochondrial OS=Homo sapiens GN=GLUD1 PE=1 SV=2;>sp|P49448|DHE4\_HUMAN Glut 4.56E-181  
 P00374;Q86XF0 DYR\_HUMAN Dihydrofolate reductase OS=Homo sapiens GN=DHFR PE=1 SV=2;>sp|Q86XF0|DYRL1\_HUMAN Dihydrofolate reductase- 1.01E-16  
 P00488;B2R6V9;B4E2L8 F13A\_HUMAN Coagulation factor XIII A chain OS=Homo sapiens GN=F13A1 PE=1 SV=4;>tr|B2R6V9|B2R6V9\_HUMAN cDNA, FLJ9314 2.65E-260  
 P00492;Q6LET3;A8MSU4 HPRT\_HUMAN Hypoxanthine-guanine phosphoribosyltransferase OS=Homo sapiens GN=HPRT1 PE=1 SV=2;>tr|Q6LET3|Q6LET3\_HUM 8.44E-81  
 P00505;B3KUZ8;A8K482;A AATM\_HUMAN Aspartate aminotransferase, mitochondrial OS=Homo sapiens GN=GOT2 PE=1 SV=3;>tr|B3KUZ8|B3KUZ8\_HUMAN Asp 1.88E-197  
 P00734;B4DDT3;C9JV37 THRB\_HUMAN Prothrombin OS=Homo sapiens GN=F2 PE=1 SV=2;>tr|B4DDT3|B4DDT3\_HUMAN cDNA FLJ54622, highly similar to Prc 0  
 P00738;Q0VAC5;Q6NSB4;HPT\_HUMAN Haptoglobin OS=Homo sapiens GN=HP PE=1 SV=1;>tr|Q0VAC5|Q0VAC5\_HUMAN HP protein OS=Homo sapiens GN=HP 0  
 P00747;B2R7F8;B4DPH4 PLMN\_HUMAN Plasminogen OS=Homo sapiens GN=PLG PE=1 SV=2;>tr|B2R7F8|B2R7F8\_HUMAN cDNA, FLJ93426, highly similar to H 2.66E-63  
 P00748;Q8IZZ5 FA12\_HUMAN Coagulation factor XII OS=Homo sapiens GN=F12 PE=1 SV=3;>tr|Q8IZZ5|Q8IZZ5\_HUMAN Coagulation factor XII-Mie 5.90E-98  
 P00966;Q5T6L4;A8KAP9;C ASSY\_HUMAN Argininosuccinate synthase OS=Homo sapiens GN=ASS1 PE=1 SV=2;>tr|Q5T6L4|Q5T6L4\_HUMAN Argininosuccinate sy 3.74E-43  
 P01009;P01009-2;P01009 A1AT\_HUMAN Alpha-1-antitrypsin OS=Homo sapiens GN=SERPINA1 PE=1 SV=3;>sp|P01009-2|A1AT\_HUMAN Isoform 2 of Alpha-1-ai 0  
 P01024;B4E216 CO3\_HUMAN Complement C3 OS=Homo sapiens GN=C3 PE=1 SV=2;>tr|B4E216|B4E216\_HUMAN cDNA FLJ57339, highly similar to C 0  
 P01031;Q59GS8 CO5\_HUMAN Complement C5 OS=Homo sapiens GN=C5 PE=1 SV=4;>tr|Q59GS8|Q59GS8\_HUMAN Complement component 5 variant 8.90E-09  
 P01040;Q6IB90;C9J0E4 CYTA\_HUMAN Cystatin-A OS=Homo sapiens GN=CSTA PE=1 SV=1;>tr|Q6IB90|Q6IB90\_HUMAN CSTA protein OS=Homo sapiens GN= 2.08E-21  
 P01112;Q9BR65;Q92468 RASH\_HUMAN GTPase HRas OS=Homo sapiens GN=HRAS PE=1 SV=1;>tr|Q9BR65|Q9BR65\_HUMAN V-Ha-ras Harvey rat sarcoma vir 8.55E-41  
 P01116-2;P01116;P01111 2|RASK\_HUMAN Isoform 2B of GTPase KRas OS=Homo sapiens GN=KRAS;>sp|P01116|RASK\_HUMAN GTPase KRas OS=Homo sapien: 2.72E-45  
 P01591;D6RD17;D6RHJ6 IGJ\_HUMAN Immunoglobulin J chain OS=Homo sapiens GN=IGJ PE=1 SV=4;>tr|D6RD17|D6RD17\_HUMAN Uncharacterized protein O: 4.49E-45  
 P01598;P01596 KV106\_HUMAN Ig kappa chain V-I region EU OS=Homo sapiens PE=1 SV=1;>sp|P01596|KV104\_HUMAN Ig kappa chain V-I region CA 1.39E-129  
 P01620;P01623;A2NB46;F KV302\_HUMAN Ig kappa chain V-III region SIE OS=Homo sapiens PE=1 SV=1;>sp|P01623|KV305\_HUMAN Ig kappa chain V-III regio 6.49E-202  
 P01620;P01623;P01622;P KV302\_HUMAN Ig kappa chain V-III region SIE OS=Homo sapiens PE=1 SV=1;>sp|P01623|KV305\_HUMAN Ig kappa chain V-III regio 4.78E-21  
 P01620;P01623;P04206 KV302\_HUMAN Ig kappa chain V-III region SIE OS=Homo sapiens PE=1 SV=1;>sp|P01623|KV305\_HUMAN Ig kappa chain V-III regio 0  
 P01779;P01770 HV318\_HUMAN Ig heavy chain V-III region TUR OS=Homo sapiens PE=1 SV=1;>sp|P01770|HV309\_HUMAN Ig heavy chain V-III regio 5.86E-244  
 P01857;P01860;P01861;P IGHG1\_HUMAN Ig gamma-1 chain C region OS=Homo sapiens GN=IGHG1 PE=1 SV=1;>sp|P01860|IGHG3\_HUMAN Ig gamma-3 chai 1.06E-09  
 P01871-2;P01871;P04220 2|IGHM\_HUMAN Isoform 2 of Ig mu chain C region OS=Homo sapiens GN=IGHM;>sp|P01871|IGHM\_HUMAN Ig mu chain C region OS 0  
 P01876;P01877 IGHA1\_HUMAN Ig alpha-1 chain C region OS=Homo sapiens GN=IGHA1 PE=1 SV=2;>sp|P01877|IGHA2\_HUMAN Ig alpha-2 chain C r 1.45E-22  
 P01889;Q31610 1B07\_HUMAN HLA class I histocompatibility antigen, B-7 alpha chain OS=Homo sapiens GN=HLA-B PE=1 SV=3;>sp|Q31610|1B81\_HI 6.75E-97  
 P01891;P16189;P30512;P 1A68\_HUMAN HLA class I histocompatibility antigen, A-68 alpha chain OS=Homo sapiens GN=HLA-A PE=1 SV=4;>sp|P16189|1A31\_H 7.45E-185  
 P01909;Q5Y7C6;Q5Y7D2;D QA1\_HUMAN HLA class II histocompatibility antigen, DQ alpha 1 chain OS=Homo sapiens GN=HLA-DQA1 PE=1 SV=1;>tr|Q5Y7C6|Q 3.77E-14  
 P02144;B0QYF8;B4DUI1;C MYG\_HUMAN Myoglobin OS=Homo sapiens GN=MB PE=1 SV=2;>tr|B0QYF8|B0QYF8\_HUMAN Myoglobin (Fragment) OS=Homo sapier 7.31E-12  
 P02452;Q6LAN8 CO1A1\_HUMAN Collagen alpha-1(I) chain OS=Homo sapiens GN=COL1A1 PE=1 SV=5;>tr|Q6LAN8|Q6LAN8\_HUMAN Collagen type I a 3.52E-152  
 P02462;P02462-2;Q59F15 CO4A1\_HUMAN Collagen alpha-1(IV) chain OS=Homo sapiens GN=COL4A1 PE=1 SV=3;>sp|P02462-2|CO4A1\_HUMAN Isoform 2 of C 3.49E-43  
 P02511;C3VMY8;B4DIA6 CRYAB\_HUMAN Alpha-crystallin B chain OS=Homo sapiens GN=CRYAB PE=1 SV=2;>tr|C3VMY8|C3VMY8\_HUMAN Alpha B crystallin O: 9.20E-47  
 P02545;P02545-3 LMNA\_HUMAN Prelamin-A/C OS=Homo sapiens GN=LMNA PE=1 SV=1;>sp|P02545-3|LMNA\_HUMAN Isoform ADelta10 of Prelamin-A/ 0  
 P02545;P02545-3;P02545 LMNA\_HUMAN Prelamin-A/C OS=Homo sapiens GN=LMNA PE=1 SV=1;>sp|P02545-3|LMNA\_HUMAN Isoform ADelta10 of Prelamin-A/ 0  
 P02545;Q5I6Y6;Q6UYC3;L LMNA\_HUMAN Prelamin-A/C OS=Homo sapiens GN=LMNA PE=1 SV=1;>tr|Q5I6Y6|Q5I6Y6\_HUMAN Lamin A/C transcript variant 1 OS 0  
 P02649;Q6LBZ1 APOE\_HUMAN Apolipoprotein E OS=Homo sapiens GN=APOE PE=1 SV=1;>tr|Q6LBZ1|Q6LBZ1\_HUMAN MRNA for apolipoprotein E (ap 0  
 P02675;Q32Q65;B4E1D3;F FIBB\_HUMAN Fibrinogen beta chain OS=Homo sapiens GN=FGB PE=1 SV=2;>tr|Q32Q65|Q32Q65\_HUMAN Fibrinogen beta chain OS= 0  
 P02746;D6R934;Q5T960;I C1QB\_HUMAN Complement C1q subcomponent subunit B OS=Homo sapiens GN=C1QB PE=1 SV=3;>tr|D6R934|D6R934\_HUMAN Unc 1.38E-47  
 P02749;D9IWP9;B4DPN0 APOH\_HUMAN Beta-2-glycoprotein 1 OS=Homo sapiens GN=APOH PE=1 SV=3;>tr|D9IWP9|D9IWP9\_HUMAN Beta-2-glycoprotein I (F 0  
 P02751;P02751-3;P02751 FINC\_HUMAN Fibronectin OS=Homo sapiens GN=FN1 PE=1 SV=4;>sp|P02751-3|FINC\_HUMAN Isoform 3 of Fibronectin OS=Homo sa 0  
 P02760;B7Z8R6 AMBP\_HUMAN Protein AMBP OS=Homo sapiens GN=AMBP PE=1 SV=1;>tr|B7Z8R6|B7Z8R6\_HUMAN cDNA FLJ51445, highly similar to 4.20E-84  
 P02763;Q5T539 A1AG1\_HUMAN Alpha-1-acid glycoprotein 1 OS=Homo sapiens GN=ORM1 PE=1 SV=1;>tr|Q5T539|Q5T539\_HUMAN Orosomucoid 1 O 3.41E-196  
 P02787;Q06AH7 TRFE\_HUMAN Serotransferrin OS=Homo sapiens GN=TF PE=1 SV=3;>tr|Q06AH7|Q06AH7\_HUMAN Transferrin OS=Homo sapiens GN= 0  
 P02790;Q9BS19 HEMO\_HUMAN Hemopexin OS=Homo sapiens GN=HPX PE=1 SV=2;>tr|Q9BS19|Q9BS19\_HUMAN HPX protein OS=Homo sapiens PE= 0  
 P04003;Q5VVQ8;B4E1D8;C 4BPA\_HUMAN C4b-binding protein alpha chain OS=Homo sapiens GN=C4BPA PE=1 SV=2;>tr|Q5VVQ8|Q5VVQ8\_HUMAN Complemer 1.61E-168

P04062;P04062-2;P04062 GLCM\_HUMAN Glucosylceramidase OS=Homo sapiens GN=GBA PE=1 SV=3;>sp|P04062-2|GLCM\_HUMAN Isoform Short of Glucosylce 1.14E-16  
P04080;Q76LA1 CYTB\_HUMAN Cystatin-B OS=Homo sapiens GN=CSTB PE=1 SV=2;>tr|Q76LA1|Q76LA1\_HUMAN CSTB protein OS=Homo sapiens GN: 8.40E-63  
P04083;Q5TZZ9;B5BU38; ANXA1\_HUMAN Annexin A1 OS=Homo sapiens GN=ANXA1 PE=1 SV=2;>tr|Q5TZZ9|Q5TZZ9\_HUMAN ANXA1 protein OS=Homo sapier 0  
P04150-3;P04150;P041503|GCR\_HUMAN Isoform Alpha-2 of Glucocorticoid receptor OS=Homo sapiens GN=NR3C1;>sp|P04150|GCR\_HUMAN Glucocorticoid rec 0.00018095  
P04207;Q9UL85;P04434;F KV308\_HUMAN Ig kappa chain V-III region CLL OS=Homo sapiens PE=1 SV=2;>tr|Q9UL85|Q9UL85\_HUMAN Myosin-reactive immuno: 6.28E-117  
P04217;P04217-2;B3KP79A1BG\_HUMAN Alpha-1B-glycoprotein OS=Homo sapiens GN=A1BG PE=1 SV=4;>sp|P04217-2|A1BG\_HUMAN Isoform 2 of Alpha-1B-g 0  
P04229;Q30154 2B11\_HUMAN HLA class II histocompatibility antigen, DRB1-1 beta chain OS=Homo sapiens GN=HLA-DRB1 PE=1 SV=2;>sp|Q30154| 4.84E-104  
P04350;B4DE77;B4DJ43;f TBB4\_HUMAN Tubulin beta-4 chain OS=Homo sapiens GN=TUBB4 PE=1 SV=2;>tr|B4DE77|B4DE77\_HUMAN cDNA FLJ55189, highly s 0  
P04406;Q2TSD0;Q0QET7; G3P\_HUMAN Glyceraldehyde-3-phosphate dehydrogenase OS=Homo sapiens GN=GAPDH PE=1 SV=3;>tr|Q2TSD0|Q2TSD0\_HUMAN C 3.87E-275  
P04439;P30443;P30455 1A03\_HUMAN HLA class I histocompatibility antigen, A-3 alpha chain OS=Homo sapiens GN=HLA-A PE=1 SV=2;>sp|P30443|1A01\_HL 1.18E-236  
P04626;P04626-4;P04626 ERBB2\_HUMAN Receptor tyrosine-protein kinase erbB-2 OS=Homo sapiens GN=ERBB2 PE=1 SV=1;>sp|P04626-4|ERBB2\_HUMAN Iso 5.47E-57  
P04792;B4DL87 HSPB1\_HUMAN Heat shock protein beta-1 OS=Homo sapiens GN=HSPB1 PE=1 SV=2;>tr|B4DL87|B4DL87\_HUMAN cDNA FLJ52243, h 1.64E-129  
P04899;P04899-2;P63096 GNAI2\_HUMAN Guanine nucleotide-binding protein G(i) subunit alpha-2 OS=Homo sapiens GN=GNAI2 PE=1 SV=3;>sp|P04899-2|GN. 5.52E-138  
P04899;Q96C71;B3KTZ0;|GNAI2\_HUMAN Guanine nucleotide-binding protein G(i) subunit alpha-2 OS=Homo sapiens GN=GNAI2 PE=1 SV=3;>tr|Q96C71|Q96C 7.93E-160  
P04908;Q08AJ9;Q7L7L0;C H2A1B\_HUMAN Histone H2A type 1-B/E OS=Homo sapiens GN=HIST1H2AB PE=1 SV=2;>tr|Q08AJ9|Q08AJ9\_HUMAN Histone H2A OS 1.30E-97  
P04908;Q7L7L0;Q93077 H2A1B\_HUMAN Histone H2A type 1-B/E OS=Homo sapiens GN=HIST1H2AB PE=1 SV=2;>sp|Q7L7L0|H2A3\_HUMAN Histone H2A type 6.31E-150  
P05023;P05023-2;P13637 AT1A1\_HUMAN Sodium/potassium-transporting ATPase subunit alpha-1 OS=Homo sapiens GN=ATP1A1 PE=1 SV=1;>sp|P05023-2|AT 1.51E-51  
P05091;Q53FB6;B4DW54;ALDH2\_HUMAN Aldehyde dehydrogenase, mitochondrial OS=Homo sapiens GN=ALDH2 PE=1 SV=2;>tr|Q53FB6|Q53FB6\_HUMAN Mitc 0  
P05156;B4DRF2;A8K3L0;CFAI\_HUMAN Complement factor I OS=Homo sapiens GN=CFI PE=1 SV=2;>tr|B4DRF2|B4DRF2\_HUMAN cDNA FLJ58124, highly simil: 1.91E-53  
P05198;Q53XC0 IF2A\_HUMAN Eukaryotic translation initiation factor 2 subunit 1 OS=Homo sapiens GN=EIF2S1 PE=1 SV=3;>tr|Q53XC0|Q53XC0\_HUM 2.19E-145  
P05204;Q15651;Q15651-;HMGN2\_HUMAN Non-histone chromosomal protein HMG-17 OS=Homo sapiens GN=HMGN2 PE=1 SV=3;>sp|Q15651|HMGN3\_HUMAN 1.28E-08  
P05362;Q5NKV8 ICAM1\_HUMAN Intercellular adhesion molecule 1 OS=Homo sapiens GN=ICAM1 PE=1 SV=2;>tr|Q5NKV8|Q5NKV8\_HUMAN Intercelluli: 3.26E-38  
P05386;Q6FG99;Q6ICQ4; RLA1\_HUMAN 60S acidic ribosomal protein P1 OS=Homo sapiens GN=RPLP1 PE=1 SV=1;>tr|Q6FG99|Q6FG99\_HUMAN RPLP1 protein 4.63E-61  
P05387;Q6FG96 RLA2\_HUMAN 60S acidic ribosomal protein P2 OS=Homo sapiens GN=RPLP2 PE=1 SV=1;>tr|Q6FG96|Q6FG96\_HUMAN RPLP2 protein 1.71E-146  
P05388;Q8NHW5 RLA0\_HUMAN 60S acidic ribosomal protein P0 OS=Homo sapiens GN=RPLP0 PE=1 SV=1;>sp|Q8NHW5|RLA0L\_HUMAN 60S acidic ribo 0  
P05412;Q6FHM7;Q6FHK0 JUN\_HUMAN Transcription factor AP-1 OS=Homo sapiens GN=JUN PE=1 SV=2;>tr|Q6FHM7|Q6FHM7\_HUMAN JUN protein OS=Homo s 9.83E-10  
P05413;Q6IBD7 FABPH\_HUMAN Fatty acid-binding protein, heart OS=Homo sapiens GN=FABP3 PE=1 SV=4;>tr|Q6IBD7|Q6IBD7\_HUMAN FABP3 protei 1.32E-13  
P05455;B5BUB5;Q14730 LA\_HUMAN Lupus La protein OS=Homo sapiens GN=SSB PE=1 SV=2;>tr|B5BUB5|B5BUB5\_HUMAN Autoantigen La (Fragment) OS=H 7.78E-228  
P05997;B4DNJ0 CO5A2\_HUMAN Collagen alpha-2(V) chain OS=Homo sapiens GN=COL5A2 PE=1 SV=3;>tr|B4DNJ0|B4DNJ0\_HUMAN cDNA FLJ60734, 1.39E-12  
P06132;Q53ZP6;Q5T450;DCUP\_HUMAN Uroporphyrinogen decarboxylase OS=Homo sapiens GN=UROD PE=1 SV=2;>tr|Q53ZP6|Q53ZP6\_HUMAN Uroporphyrin 5.18E-18  
P06280;Q53HF3;Q53Y83;AGAL\_HUMAN Alpha-galactosidase A OS=Homo sapiens GN=GLA PE=1 SV=1;>tr|Q53HF3|Q53HF3\_HUMAN Galactosidase, alpha varia 3.90E-31  
P06401;Q8TDS3;P06401-;PRGR\_HUMAN Progesterone receptor OS=Homo sapiens GN=PGR PE=1 SV=4;>tr|Q8TDS3|Q8TDS3\_HUMAN Delta 4 progesterone rec 3.57E-05  
P06454;P06454-2;O60271 PTMA\_HUMAN Prothymosin alpha OS=Homo sapiens GN=PTMA PE=1 SV=2;>sp|P06454-2|PTMA\_HUMAN Isoform 2 of Prothymosin al 3.29E-184  
P06454;P06454-2;Q15204 PTMA\_HUMAN Prothymosin alpha OS=Homo sapiens GN=PTMA PE=1 SV=2;>sp|P06454-2|PTMA\_HUMAN Isoform 2 of Prothymosin al 2.98E-51  
P06576;Q0QEN7 ATPB\_HUMAN ATP synthase subunit beta, mitochondrial OS=Homo sapiens GN=ATP5B PE=1 SV=3;>tr|Q0QEN7|Q0QEN7\_HUMAN ATP 0  
P06727;Q13784 APOA4\_HUMAN Apolipoprotein A-IV OS=Homo sapiens GN=APOA4 PE=1 SV=3;>tr|Q13784|Q13784\_HUMAN APOA4 protein (Fragmer 0  
P06733;P06733-2;E2DRY6 ENOA\_HUMAN Alpha-enolase OS=Homo sapiens GN=ENO1 PE=1 SV=2;>sp|P06733-2|ENOA\_HUMAN Isoform MBP-1 of Alpha-enolase 0  
P06737;B4DUB7;B2R825 PYGL\_HUMAN Glycogen phosphorylase, liver form OS=Homo sapiens GN=PYGL PE=1 SV=4;>tr|B4DUB7|B4DUB7\_HUMAN Phosphoryl. 0  
P06899;P23527;P33778;C H2B1J\_HUMAN Histone H2B type 1-J OS=Homo sapiens GN=HIST1H2BJ PE=1 SV=3;>sp|P23527|H2B1O\_HUMAN Histone H2B type 1 4.11E-129  
P07195;Q5U077;A8MW50 LDHB\_HUMAN L-lactate dehydrogenase B chain OS=Homo sapiens GN=LDHB PE=1 SV=2;>tr|Q5U077|Q5U077\_HUMAN L-lactate dehy 2.92E-226  
P07197;P07196 NFM\_HUMAN Neurofilament medium polypeptide OS=Homo sapiens GN=NEFM PE=1 SV=3;>sp|P07196|NFM\_HUMAN Neurofilament li 8.51E-13  
P07203;Q6NSD4 GPX1\_HUMAN Glutathione peroxidase 1 OS=Homo sapiens GN=GPX1 PE=1 SV=4;>tr|Q6NSD4|Q6NSD4\_HUMAN Glutathione peroxidase 4.96E-29  
P07237;B4DNL5;B4DUA5; PDIA1\_HUMAN Protein disulfide-isomerase OS=Homo sapiens GN=P4HB PE=1 SV=3;>tr|B4DNL5|B4DNL5\_HUMAN cDNA FLJ59361, hi 0  
P07305;B4DRD6 H10\_HUMAN Histone H1.0 OS=Homo sapiens GN=H1F0 PE=1 SV=3;>tr|B4DRD6|B4DRD6\_HUMAN cDNA FLJ54804, highly similar to H 1.45E-39  
P07339;C9JH19;C9J9G3 CATD\_HUMAN Cathepsin D OS=Homo sapiens GN=CTSD PE=1 SV=1;>tr|C9JH19|C9JH19\_HUMAN Uncharacterized protein OS=Homo 2.49E-161  
P07355-2;P07355;A6NMY12|ANXA2\_HUMAN Isoform 2 of Annexin A2 OS=Homo sapiens GN=ANXA2;>sp|P07355|ANXA2\_HUMAN Annexin A2 OS=Homo sapiens 0  
P07360;Q5SQ08 CO8G\_HUMAN Complement component C8 gamma chain OS=Homo sapiens GN=C8G PE=1 SV=3;>tr|Q5SQ08|Q5SQ08\_HUMAN Com 1.54E-14  
P07384;B2RDI5;A8MSM1; CAN1\_HUMAN Calpain-1 catalytic subunit OS=Homo sapiens GN=CAPN1 PE=1 SV=1;>tr|B2RDI5|B2RDI5\_HUMAN cDNA, FLJ96627, h 5.01E-163  
P07437;Q5SU16;Q5JP53;f TBB5\_HUMAN Tubulin beta chain OS=Homo sapiens GN=TUBB PE=1 SV=2;>tr|Q5SU16|Q5SU16\_HUMAN Beta 5-tubulin OS=Homo sa 0  
P07585;Q6FH10;P07585-4 PGS2\_HUMAN Decorin OS=Homo sapiens GN=DCN PE=1 SV=1;>tr|Q6FH10|Q6FH10\_HUMAN DCN protein OS=Homo sapiens GN=DC 1.95E-280  
P07686;Q5URX0 HEXB\_HUMAN Beta-hexosaminidase subunit beta OS=Homo sapiens GN=HEXB PE=1 SV=3;>tr|Q5URX0|Q5URX0\_HUMAN ENC-1AS O 5.94E-76  
P07737;Q53Y44 PROF1\_HUMAN Profilin-1 OS=Homo sapiens GN=PFN1 PE=1 SV=2;>tr|Q53Y44|Q53Y44\_HUMAN Profilin OS=Homo sapiens GN=PFN1 3.99E-289  
P07814;B4DKX5;Q3KQZ8 SYEP\_HUMAN Bifunctional aminoacyl-tRNA synthetase OS=Homo sapiens GN=EPRS PE=1 SV=5;>tr|B4DKX5|B4DKX5\_HUMAN cDNA f 0  
P07858;B3KUJ8;B4DL49;E CATB\_HUMAN Cathepsin B OS=Homo sapiens GN=CTSB PE=1 SV=3;>tr|B3KUJ8|B3KUJ8\_HUMAN cDNA FLJ40065 fis, clone TESOP20 4.36E-86  
P07900-2;P07900;Q2VPJ62|HS90A\_HUMAN Isoform 2 of Heat shock protein HSP 90-alpha OS=Homo sapiens GN=HSP90AA1;>sp|P07900|HS90A\_HUMAN Heat 0  
P07942;Q8TAS6 LAMB1\_HUMAN Laminin subunit beta-1 OS=Homo sapiens GN=LAMB1 PE=1 SV=2;>tr|Q8TAS6|Q8TAS6\_HUMAN LAMB1 protein (Frag 2.86E-25  
P07947;P06241;P06241-2 YES\_HUMAN Tyrosine-protein kinase Yes OS=Homo sapiens GN=YES1 PE=1 SV=3;>sp|P06241|FYN\_HUMAN Tyrosine-protein kinase F 9.07E-12  
P07948;P07948-2;P08631 LYN\_HUMAN Tyrosine-protein kinase Lyn OS=Homo sapiens GN=LYN PE=1 SV=3;>sp|P07948-2|LYN\_HUMAN Isoform LYN B of Tyrosin 4.83E-17  
P08134;Q5JR08;Q5JR05;C RHOC\_HUMAN Rho-related GTP-binding protein RhoC OS=Homo sapiens GN=RHOC PE=1 SV=1;>tr|Q5JR08|Q5JR08\_HUMAN Ras hom 4.05E-68  
P08236;P08236-2 BGLR\_HUMAN Beta-glucuronidase OS=Homo sapiens GN=GUSB PE=1 SV=2;>sp|P08236-2|BGLR\_HUMAN Isoform Short of Beta-gluci 2.85E-32  
P08238;B4DGL0;B4DMA2 HS90B\_HUMAN Heat shock protein HSP 90-beta OS=Homo sapiens GN=HSP90AB1 PE=1 SV=4;>tr|B4DGL0|B4DGL0\_HUMAN cDNA FI 0

|                                   |                                                                                                                             |           |
|-----------------------------------|-----------------------------------------------------------------------------------------------------------------------------|-----------|
| P08238;Q58FF7                     | HS90B_HUMAN Heat shock protein HSP 90-beta OS=Homo sapiens GN=HSP90AB1 PE=1 SV=4;>sp Q58FF7 H90B3_HUMAN Putative            | 0         |
| P08240;Q6IAX9;B4E0H3              | SRPR_HUMAN Signal recognition particle receptor subunit alpha OS=Homo sapiens GN=SRPR PE=1 SV=2;>tr Q6IAX9 Q6IAX9_HUMA      | 5.93E-50  |
| P08253;B4DWH3                     | MMP2_HUMAN 72 kDa type IV collagenase OS=Homo sapiens GN=MMP2 PE=1 SV=2;>tr B4DWH3 B4DWH3_HUMAN cDNA FLJ59773,              | 2.05E-55  |
| P08572;B4DH43                     | CO4A2_HUMAN Collagen alpha-2(IV) chain OS=Homo sapiens GN=COL4A2 PE=1 SV=4;>tr B4DH43 B4DH43_HUMAN cDNA FLJ56433            | 2.47E-08  |
| P08574;Q8TBT6                     | CY1_HUMAN Cytochrome c1, heme protein, mitochondrial OS=Homo sapiens GN=CYC1 PE=1 SV=3;>tr Q8TBT6 Q8TBT6_HUMAN Put          | 2.37E-20  |
| P08581-2;P08581                   | 2 MET_HUMAN Isoform 2 of Hepatocyte growth factor receptor OS=Homo sapiens GN=MET;>sp P08581 MET_HUMAN Hepatocyte gro       | 1.80E-15  |
| P08590;P05976;P05976-2            | MYL3_HUMAN Myosin light chain 3 OS=Homo sapiens GN=MYL3 PE=1 SV=3;>sp P05976 MYL3_HUMAN Myosin light chain 1/3, skelet      | 2.93E-09  |
| P08603;A8K5T0;Q14006              | CFAH_HUMAN Complement factor H OS=Homo sapiens GN=CFH PE=1 SV=4;>tr A8K5T0 A8K5T0_HUMAN cDNA FLJ75416, highly sim           | 1.96E-162 |
| P08621;P08621-2;P08621            | RU17_HUMAN U1 small nuclear ribonucleoprotein 70 kDa OS=Homo sapiens GN=SNRNP70 PE=1 SV=2;>sp P08621-2 RU17_HUMAN           | 3.40E-77  |
| P08637;C9JC71                     | FCG3A_HUMAN Low affinity immunoglobulin gamma Fc region receptor III-A OS=Homo sapiens GN=FCGR3A PE=2 SV=2;>tr C9JC71       | 7.11E-06  |
| P08697;B4E1B7;C9JMH6;A2AP_HUMAN   | Alpha-2-antiplasmin OS=Homo sapiens GN=SERPINF2 PE=1 SV=3;>tr B4E1B7 B4E1B7_HUMAN cDNA FLJ50942, highl                      | 8.20E-115 |
| P08708;P0CW22                     | RS17_HUMAN 40S ribosomal protein S17 OS=Homo sapiens GN=RPS17 PE=1 SV=2;>sp P0CW22 RS17L_HUMAN 40S ribosomal prot           | 8.97E-278 |
| P08727;C9JM50                     | K1C19_HUMAN Keratin, type I cytoskeletal 19 OS=Homo sapiens GN=KRT19 PE=1 SV=4;>tr C9JM50 C9JM50_HUMAN Uncharacterize       | 0         |
| P08754;Q5TZX1                     | GNAI3_HUMAN Guanine nucleotide-binding protein G(k) subunit alpha OS=Homo sapiens GN=GNAI3 PE=1 SV=3;>tr Q5TZX1 Q5TZX       | 3.38E-89  |
| P08865;C9J9K3;A6NE09;C9J9K3       | RSSA_HUMAN 40S ribosomal protein SA OS=Homo sapiens GN=RPSA PE=1 SV=4;>tr C9J9K3 C9J9K3_HUMAN Uncharacterized prote         | 2.16E-270 |
| P09104;Q6FHV6;A8K3B0;ENO2_HUMAN   | Gamma-enolase OS=Homo sapiens GN=ENO2 PE=1 SV=3;>tr Q6FHV6 Q6FHV6_HUMAN Enolase OS=Homo sapiens G                           | 0         |
| P09110;C9JDE9;B4DEN6;THIK_HUMAN   | 3-ketoacyl-CoA thiolase, peroxisomal OS=Homo sapiens GN=ACAA1 PE=1 SV=2;>tr C9JDE9 C9JDE9_HUMAN Uncharac                    | 7.29E-100 |
| P09211;A8MX94                     | GSTP1_HUMAN Glutathione S-transferase P OS=Homo sapiens GN=GSTP1 PE=1 SV=2;>tr A8MX94 A8MX94_HUMAN Uncharacterized          | 6.41E-216 |
| P09417;B3KW71;D6RGG7              | DHPR_HUMAN Dihydropteridine reductase OS=Homo sapiens GN=QDPR PE=1 SV=2;>tr B3KW71 B3KW71_HUMAN Quinoid dihydropt           | 1.80E-179 |
| P09429;B2RPK0                     | HMGB1_HUMAN High mobility group protein B1 OS=Homo sapiens GN=HMGB1 PE=1 SV=3;>sp B2RPK0 HGB1A_HUMAN Putative high          | 2.17E-148 |
| P09429;Q59GW1;B7Z965;HMGB1_HUMAN  | High mobility group protein B1 OS=Homo sapiens GN=HMGB1 PE=1 SV=3;>tr Q59GW1 Q59GW1_HUMAN High-mobi                         | 9.90E-174 |
| P09488;P09488-2;B9ZVX;GSTM1_HUMAN | Glutathione S-transferase Mu 1 OS=Homo sapiens GN=GSTM1 PE=1 SV=3;>sp P09488-2 GSTM1_HUMAN Isoform 2                        | 6.42E-96  |
| P09488;P09488-2;Q0301;GSTM1_HUMAN | Glutathione S-transferase Mu 1 OS=Homo sapiens GN=GSTM1 PE=1 SV=3;>sp P09488-2 GSTM1_HUMAN Isoform 2                        | 1.43E-74  |
| P09493-3;P09493-4;P09493-3        | TPM1_HUMAN Isoform 3 of Tropomyosin alpha-1 chain OS=Homo sapiens GN=TPM1;>sp P09493-4 TPM1_HUMAN Isoform 4 of Trop         | 0         |
| P09493-3;P09493-4;P09493-3        | TPM1_HUMAN Isoform 3 of Tropomyosin alpha-1 chain OS=Homo sapiens GN=TPM1;>sp P09493-4 TPM1_HUMAN Isoform 4 of Trop         | 0         |
| P09496;P09496-3;P09496            | CLCA_HUMAN Clathrin light chain A OS=Homo sapiens GN=CLTA PE=1 SV=1;>sp P09496-3 CLCA_HUMAN Isoform 3 of Clathrin light     | 2.63E-09  |
| P09497;P09497-2;D6RJD1            | CLCB_HUMAN Clathrin light chain B OS=Homo sapiens GN=CLTB PE=1 SV=1;>sp P09497-2 CLCB_HUMAN Isoform Non-brain of Clath      | 1.36E-17  |
| P09543;P09543-2;B4DI06            | CN37_HUMAN 2,3-cyclic-nucleotide 3-phosphodiesterase OS=Homo sapiens GN=CNP PE=1 SV=2;>sp P09543-2 CN37_HUMAN Isofor        | 1.91E-86  |
| P09622;B4DFL1;B4DMK9;DLDH_HUMAN   | Dihydrolipoyl dehydrogenase, mitochondrial OS=Homo sapiens GN=DLD PE=1 SV=2;>tr B4DFL1 B4DFL1_HUMAN Dihy                    | 1.02E-212 |
| P09651;P09651-2;Q6IPF2            | ROA1_HUMAN Heterogeneous nuclear ribonucleoprotein A1 OS=Homo sapiens GN=HNRNPA1 PE=1 SV=5;>sp P09651-2 ROA1_HUMA           | 3.70E-147 |
| P09661;Q53G21;Q53G61;RU2A_HUMAN   | U2 small nuclear ribonucleoprotein A OS=Homo sapiens GN=SNRPA1 PE=1 SV=2;>tr Q53G21 Q53G21_HUMAN Small n                    | 2.17E-45  |
| P09874;B2R5W3;B4E0E1              | PARP1_HUMAN Poly [ADP-ribose] polymerase 1 OS=Homo sapiens GN=PARP1 PE=1 SV=4;>tr B2R5W3 B2R5W3_HUMAN cDNA, FLJ9:           | 6.41E-198 |
| P09914;Q5T7J1;D3DR31;IFIT1_HUMAN  | Interferon-induced protein with tetratricopeptide repeats 1 OS=Homo sapiens GN=IFIT1 PE=1 SV=2;>tr Q5T7J1 Q5T7:             | 3.63E-269 |
| P09960;P09960-2                   | LKHA4_HUMAN Leukotriene A-4 hydrolase OS=Homo sapiens GN=LTA4H PE=1 SV=2;>sp P09960-2 LKHA4_HUMAN Isoform 2 of Leuk         | 2.30E-166 |
| P09960;P09960-2;P09960            | LKHA4_HUMAN Leukotriene A-4 hydrolase OS=Homo sapiens GN=LTA4H PE=1 SV=2;>sp P09960-2 LKHA4_HUMAN Isoform 2 of Leuk         | 7.34E-212 |
| P0C0S5;Q71UI9                     | H2AZ_HUMAN Histone H2A.Z OS=Homo sapiens GN=H2AFZ PE=1 SV=2;>sp Q71UI9 H2AV_HUMAN Histone H2A.V OS=Homo sapien:             | 1.79E-121 |
| P0C0S5;Q71UI9;C9J0D1;H2AZ_HUMAN   | Histone H2A.Z OS=Homo sapiens GN=H2AFZ PE=1 SV=2;>sp Q71UI9 H2AV_HUMAN Histone H2A.V OS=Homo sapien:                        | 1.81E-19  |
| P0C0S8;P20671;Q6F113;CH2A1_HUMAN  | Histone H2A type 1 OS=Homo sapiens GN=HIST1H2AG PE=1 SV=2;>sp P20671 H2A1D_HUMAN Histone H2A type 1-D                       | 2.34E-144 |
| P0C0S8;P20671;Q96KK5;H2A1_HUMAN   | Histone H2A type 1 OS=Homo sapiens GN=HIST1H2AG PE=1 SV=2;>sp P20671 H2A1D_HUMAN Histone H2A type 1-D                       | 6.10E-128 |
| P0C7P4;P47985                     | UCRIL_HUMAN Putative cytochrome b-c1 complex subunit Rieske-like protein 1 OS=Homo sapiens GN=UQCRFSL1 PE=5 SV=1;>sp P4     | 9.31E-61  |
| P0CF74;P0CG05;P0CG06;LAC6_HUMAN   | Ig lambda-6 chain C region OS=Homo sapiens GN=IGLC6 PE=4 SV=1;>sp P0CG05 LAC2_HUMAN Ig lambda-2 chain C                     | 1.25E-11  |
| P0CG05;P0CG06;P0CF74              | LAC2_HUMAN Ig lambda-2 chain C regions OS=Homo sapiens GN=IGLC2 PE=1 SV=1;>sp P0CG06 LAC3_HUMAN Ig lambda-3 chain C         | 1.13E-242 |
| P0CG05;P0CG06;P0CF74;LAC2_HUMAN   | Ig lambda-2 chain C regions OS=Homo sapiens GN=IGLC2 PE=1 SV=1;>sp P0CG06 LAC3_HUMAN Ig lambda-3 chain C                    | 0         |
| P0CG29;P0CG30                     | GST2_HUMAN Glutathione S-transferase theta-2 OS=Homo sapiens GN=GSTT2 PE=1 SV=1;>sp P0CG30 GSTT2_HUMAN Glutathione          | 5.02E-15  |
| P10155;P10155-2                   | RO60_HUMAN 60 kDa SS-A/Ro ribonucleoprotein OS=Homo sapiens GN=TROVE2 PE=1 SV=2;>sp P10155-2 RO60_HUMAN Isoform S           | 6.85E-37  |
| P10155;Q5LJ99;Q86WL3;RO60_HUMAN   | 60 kDa SS-A/Ro ribonucleoprotein OS=Homo sapiens GN=TROVE2 PE=1 SV=2;>tr Q5LJ99 Q5LJ99_HUMAN TROVE dor                      | 2.00E-56  |
| P10319;P18465                     | 1B58_HUMAN HLA class I histocompatibility antigen, B-58 alpha chain OS=Homo sapiens GN=HLA-B PE=2 SV=1;>sp P18465 1B57_H    | 4.31E-139 |
| P10319;P18465;P30484              | 1B58_HUMAN HLA class I histocompatibility antigen, B-58 alpha chain OS=Homo sapiens GN=HLA-B PE=2 SV=1;>sp P18465 1B57_H    | 9.30E-201 |
| P10412;P16402                     | H14_HUMAN Histone H1.4 OS=Homo sapiens GN=HIST1H1E PE=1 SV=2;>sp P16402 H13_HUMAN Histone H1.3 OS=Homo sapiens C            | 1.91E-130 |
| P10515;Q86YI5;B4DJX1;BODP2_HUMAN  | Dihydrolipoyllysine-residue acetyltransferase component of pyruvate dehydrogenase complex, mitochondrial OS=Homo            | 1.30E-82  |
| P10599;B1ALW1;O60744              | THIO_HUMAN Thioredoxin OS=Homo sapiens GN=TXN PE=1 SV=3;>tr B1ALW1 B1ALW1_HUMAN Thioredoxin OS=Homo sapiens GN=             | 2.06E-91  |
| P10606;Q53YB7;Q6FHM4;COX5B_HUMAN  | Cytochrome c oxidase subunit 5B, mitochondrial OS=Homo sapiens GN=COX5B PE=1 SV=2;>tr Q53YB7 Q53YB7_HU                      | 4.59E-18  |
| P10620;Q6LET6                     | MGST1_HUMAN Microsomal glutathione S-transferase 1 OS=Homo sapiens GN=MGST1 PE=1 SV=1;>tr Q6LET6 Q6LET6_HUMAN MGS           | 8.41E-34  |
| P10809;B3GQS7;B7Z597;CH60_HUMAN   | 60 kDa heat shock protein, mitochondrial OS=Homo sapiens GN=HSPD1 PE=1 SV=2;>tr B3GQS7 B3GQS7_HUMAN Mit                     | 0         |
| P10909-2;P10909;B3KSE6;CLUS_HUMAN | Isoform 2 of Clusterin OS=Homo sapiens GN=CLU;>sp P10909 CLUS_HUMAN Clusterin OS=Homo sapiens GN=CLU F                      | 1.55E-219 |
| P11021;Q2KHP4                     | GRP78_HUMAN 78 kDa glucose-regulated protein OS=Homo sapiens GN=HSPA5 PE=1 SV=2;>tr Q2KHP4 Q2KHP4_HUMAN HSPA5 prc           | 0         |
| P11142;Q53GZ6;Q96IS6;HSP7C_HUMAN  | Heat shock cognate 71 kDa protein OS=Homo sapiens GN=HSPA8 PE=1 SV=1;>tr Q53GZ6 Q53GZ6_HUMAN Heat shc                       | 0         |
| P11177;P11177-2                   | ODPB_HUMAN Pyruvate dehydrogenase E1 component subunit beta, mitochondrial OS=Homo sapiens GN=PDHB PE=1 SV=3;>sp P11        | 4.53E-123 |
| P11182;B4E1Q7;Q5VVL7              | ODB2_HUMAN Lipoamide acyltransferase component of branched-chain alpha-keto acid dehydrogenase complex, mitochondrial OS=Hc | 2.15E-22  |
| P11215;Q4VAK1;B3KXM6              | ITAM_HUMAN Integrin alpha-M OS=Homo sapiens GN=ITGAM PE=1 SV=2;>tr Q4VAK1 Q4VAK1_HUMAN Integrin, alpha M (Compleme          | 1.37E-08  |
| P11216;B4DSD8                     | PYGB_HUMAN Glycogen phosphorylase, brain form OS=Homo sapiens GN=PYGB PE=1 SV=5;>tr B4DSD8 B4DSD8_HUMAN Phosphory           | 0         |

P11277-2;P11277;P11277 2|SPTB1\_HUMAN Isoform 2 of Spectrin beta chain, erythrocyte OS=Homo sapiens GN=SPTB;>sp|P11277|SPTB1\_HUMAN Spectrin bet 7.22E-30  
P11279;B3KRY3;B4DWL3 LAMP1\_HUMAN Lysosome-associated membrane glycoprotein 1 OS=Homo sapiens GN=LAMP1 PE=1 SV=3;>tr|B3KRY3|B3KRY3\_HUM 4.82E-65  
P11413-2;P11413-3;P114 2|G6PD\_HUMAN Isoform Long of Glucose-6-phosphate 1-dehydrogenase OS=Homo sapiens GN=G6PD;>sp|P11413-3|G6PD\_HUMAN I 3.64E-55  
P11586;B7Z809 C1TC\_HUMAN C-1-tetrahydrofolate synthase, cytoplasmic OS=Homo sapiens GN=MTHFD1 PE=1 SV=3;>tr|B7Z809|B7Z809\_HUMAN c 3.23E-216  
P11717;Q59EZ3 MPRI\_HUMAN Cation-independent mannose-6-phosphate receptor OS=Homo sapiens GN=IGF2R PE=1 SV=3;>tr|Q59EZ3|Q59EZ3\_HL 7.51E-78  
P11766;Q5U043;Q6FI45;C ADHX\_HUMAN Alcohol dehydrogenase class-3 OS=Homo sapiens GN=ADH5 PE=1 SV=4;>tr|Q5U043|Q5U043\_HUMAN Alcohol dehydr 1.44E-138  
P11908-2;P11908 2|PRPS2\_HUMAN Isoform 2 of Ribose-phosphate pyrophosphokinase 2 OS=Homo sapiens GN=PRPS2;>sp|P11908|PRPS2\_HUMAN Rib 3.57E-53  
P11940;P11940-2 PABP1\_HUMAN Polyadenylate-binding protein 1 OS=Homo sapiens GN=PABPC1 PE=1 SV=2;>sp|P11940-2|PABP1\_HUMAN Isoform 2 ( 0  
P11940;P11940-2;Q9H36 PABP1\_HUMAN Polyadenylate-binding protein 1 OS=Homo sapiens GN=PABPC1 PE=1 SV=2;>sp|P11940-2|PABP1\_HUMAN Isoform 2 ( 0  
P12081;D6REN6;B4DY73; SYHC\_HUMAN Histidyl-tRNA synthetase, cytoplasmic OS=Homo sapiens GN=HARS PE=1 SV=2;>tr|D6REN6|D6REN6\_HUMAN Unchara 2.07E-146  
P12110;Q9BUM6;P12110- CO6A2\_HUMAN Collagen alpha-2(VI) chain OS=Homo sapiens GN=COL6A2 PE=1 SV=4;>tr|Q9BUM6|Q9BUM6\_HUMAN COL6A2 protei 0  
P12270;Q99968 TPR\_HUMAN Nucleoprotein TPR OS=Homo sapiens GN=TPR PE=1 SV=3;>tr|Q99968|Q99968\_HUMAN Tpr OS=Homo sapiens GN=tpr 1.95E-157  
P12277;B4DP56 KCRB\_HUMAN Creatine kinase B-type OS=Homo sapiens GN=CKB PE=1 SV=1;>tr|B4DP56|B4DP56\_HUMAN cDNA FLJ52237, highly s 7.25E-82  
P12429;D6RA82 ANXA3\_HUMAN Annexin A3 OS=Homo sapiens GN=ANXA3 PE=1 SV=3;>tr|D6RA82|D6RA82\_HUMAN Uncharacterized protein OS=Ho 8.39E-176  
P12532;P12532-2;C9JSQ1 KCRU\_HUMAN Creatine kinase U-type, mitochondrial OS=Homo sapiens GN=CKMT1A PE=1 SV=1;>sp|P12532-2|KCRU\_HUMAN Isofor 1.39E-286  
P12931-2;P12931 2|SRC\_HUMAN Isoform 2 of Proto-oncogene tyrosine-protein kinase Src OS=Homo sapiens GN=SRC;>sp|P12931|SRC\_HUMAN Proto- 8.84E-10  
P12931-2;P12931;P07947 2|SRC\_HUMAN Isoform 2 of Proto-oncogene tyrosine-protein kinase Src OS=Homo sapiens GN=SRC;>sp|P12931|SRC\_HUMAN Proto- 1.99E-21  
P12956;B1AHC9;B2RDN9; XRCC6\_HUMAN X-ray repair cross-complementing protein 6 OS=Homo sapiens GN=XRCC6 PE=1 SV=2;>tr|B1AHC9|B1AHC9\_HUMAN 0  
P13010;Q53T09 XRCC5\_HUMAN X-ray repair cross-complementing protein 5 OS=Homo sapiens GN=XRCC5 PE=1 SV=3;>tr|Q53T09|Q53T09\_HUMAN I 0  
P13284;Q8NEI4;Q8WU77; GILT\_HUMAN Gamma-interferon-inducible lysosomal thiol reductase OS=Homo sapiens GN=IFI30 PE=1 SV=2;>tr|Q8NEI4|Q8NEI4\_HI 2.71E-33  
P13473;Q6Q3G8;D3DTF0; LAMP2\_HUMAN Lysosome-associated membrane glycoprotein 2 OS=Homo sapiens GN=LAMP2 PE=1 SV=2;>tr|Q6Q3G8|Q6Q3G8\_HUM 1.98E-13  
P13489;Q8IZK8;Q9BQ80; RINI\_HUMAN Ribonuclease inhibitor OS=Homo sapiens GN=RNH1 PE=1 SV=2;>tr|Q8IZK8|Q8IZK8\_HUMAN Ribonuclease/angiogenin 1.99E-128  
P13674-2;Q5VSQ6;C9JL12|P4HA1\_HUMAN Isoform 2 of Prolyl 4-hydroxylase subunit alpha-1 OS=Homo sapiens GN=P4HA1;>tr|Q5VSQ6|Q5VSQ6\_HUMAN Proc 3.05E-189  
P13716;P13716-2 HEM2\_HUMAN Delta-aminolevulinic acid dehydratase OS=Homo sapiens GN=ALAD PE=1 SV=1;>sp|P13716-2|HEM2\_HUMAN Isoform 1.83E-16  
P13762;Q2LIR4;Q30152;C DRB4\_HUMAN HLA class II histocompatibility antigen, DR beta 4 chain OS=Homo sapiens GN=HLA-DRB4 PE=1 SV=2;>tr|Q2LIR4|Q2L 4.71E-10  
P13796;Q53FI1;Q59GX5 PLSL\_HUMAN Plastin-2 OS=Homo sapiens GN=LCP1 PE=1 SV=6;>tr|Q53FI1|Q53FI1\_HUMAN L-plastin variant (Fragment) OS=Homo 0  
P13804;Q53XN3;B4DT43 ETFA\_HUMAN Electron transfer flavoprotein subunit alpha, mitochondrial OS=Homo sapiens GN=ETFA PE=1 SV=1;>tr|Q53XN3|Q53XN 3.55E-234  
P13928;Q5T2P8 ANXA8\_HUMAN Annexin A8 OS=Homo sapiens GN=ANXA8 PE=1 SV=3;>sp|Q5T2P8|AXA81\_HUMAN Annexin A8-like protein 1 OS=Ho 0  
P13929;P13929-3;P13929 ENOB\_HUMAN Beta-enolase OS=Homo sapiens GN=ENO3 PE=1 SV=4;>sp|P13929-3|ENOB\_HUMAN Isoform 3 of Beta-enolase OS=H 2.60E-156  
P13987;Q6FHM9 CD59\_HUMAN CD59 glycoprotein OS=Homo sapiens GN=CD59 PE=1 SV=1;>tr|Q6FHM9|Q6FHM9\_HUMAN CD59 antigen, complement 2.42E-19  
P13995;B2R7W0;Q7Z650; MTDC\_HUMAN Bifunctional methylenetetrahydrofolate dehydrogenase/cyclohydrolase, mitochondrial OS=Homo sapiens GN=MTHFD2 F 3.39E-15  
P14317;B4DQ92 HCLS1\_HUMAN Hematopoietic lineage cell-specific protein OS=Homo sapiens GN=HCLS1 PE=1 SV=3;>tr|B4DQ92|B4DQ92\_HUMAN cl 1.19E-177  
P14618;P14618-2 KPYM\_HUMAN Pyruvate kinase isozymes M1/M2 OS=Homo sapiens GN=PKM2 PE=1 SV=4;>sp|P14618-2|KPYM\_HUMAN Isoform M1 o 0  
P14625;Q5CAQ5;B4DU71;ENPL\_HUMAN Endoplasmic reticulum protein OS=Homo sapiens GN=HSP90B1 PE=1 SV=1;>tr|Q5CAQ5|Q5CAQ5\_HUMAN Tumor rejection antigen (Gp9 0  
P14678-3;P14678;P14678 3|RSMB\_HUMAN Isoform SM-B1 of Small nuclear ribonucleoprotein-associated proteins B and B OS=Homo sapiens GN=SNRPB;>sp|P1 2.22E-32  
P14678-3;P14678;P63162 3|RSMB\_HUMAN Isoform SM-B1 of Small nuclear ribonucleoprotein-associated proteins B and B OS=Homo sapiens GN=SNRPB;>sp|P1 2.06E-25  
P14780;B7Z507;B7Z747;f MMP9\_HUMAN Matrix metalloproteinase-9 OS=Homo sapiens GN=MMP9 PE=1 SV=3;>tr|B7Z507|B7Z507\_HUMAN cDNA FLJ51036, hi 2.38E-45  
P14866;Q6NTA2;B2R959;f HNRPL\_HUMAN Heterogeneous nuclear ribonucleoprotein L OS=Homo sapiens GN=HNRNPL PE=1 SV=2;>tr|Q6NTA2|Q6NTA2\_HUMAN 0  
P14927;B2R4A2;B7Z2R2 QCR7\_HUMAN Cytochrome b-c1 complex subunit 7 OS=Homo sapiens GN=UQCRB PE=1 SV=2;>tr|B2R4A2|B2R4A2\_HUMAN cDNA, FI 1.16E-72  
P15121;Q59EL5 ALDR\_HUMAN Aldose reductase OS=Homo sapiens GN=AKR1B1 PE=1 SV=3;>tr|Q59EL5|Q59EL5\_HUMAN Aldo-keto reductase family 1.11E-44  
P15151;P15151-4;P15151 PVR\_HUMAN Poliovirus receptor OS=Homo sapiens GN=PVR PE=1 SV=2;>sp|P15151-4|PVR\_HUMAN Isoform Delta of Poliovirus recep 5.96E-50  
P15153;B1AH78;B1AH80; RAC2\_HUMAN Ras-related C3 botulinum toxin substrate 2 OS=Homo sapiens GN=RAC2 PE=1 SV=1;>tr|B1AH78|B1AH78\_HUMAN Ras 5.54E-43  
P15374;Q5TBK7 UCHL3\_HUMAN Ubiquitin carboxyl-terminal hydrolase isozyme L3 OS=Homo sapiens GN=UCHL3 PE=1 SV=1;>tr|Q5TBK7|Q5TBK7\_HL 6.88E-131  
P15559;B7ZAD1;Q53G81;NQO1\_HUMAN NAD(P)H dehydrogenase [quinone] 1 OS=Homo sapiens GN=NQO1 PE=1 SV=1;>tr|B7ZAD1|B7ZAD1\_HUMAN NAD(P)H 1.24E-75  
P15924;P15924-2 DESP\_HUMAN Desmoplakin OS=Homo sapiens GN=DSP PE=1 SV=3;>sp|P15924-2|DESP\_HUMAN Isoform DPII of Desmoplakin OS=H 3.30E-11  
P15927-3;P15927-2;P159 3|RFA2\_HUMAN Isoform 3 of Replication protein A 32 kDa subunit OS=Homo sapiens GN=RPA2;>sp|P15927-2|RFA2\_HUMAN Isoform 1.20E-36  
P16104;Q96QV6 H2AX\_HUMAN Histone H2A.x OS=Homo sapiens GN=H2AFX PE=1 SV=2;>sp|Q96QV6|H2A1A\_HUMAN Histone H2A type 1-A OS=Hom 6.20E-225  
P16144;P16144-3;P16144 ITB4\_HUMAN Integrin beta-4 OS=Homo sapiens GN=ITGB4 PE=1 SV=5;>sp|P16144-3|ITB4\_HUMAN Isoform Beta-4B of Integrin bet; 5.53E-71  
P16152;O75828 CBR1\_HUMAN Carbonyl reductase [NADPH] 1 OS=Homo sapiens GN=CBR1 PE=1 SV=3;>sp|O75828|CBR3\_HUMAN Carbonyl reductas 3.92E-136  
P16615;P16615-4;P16615 AT2A2\_HUMAN Sarcoplasmic/endoplasmic reticulum calcium ATPase 2 OS=Homo sapiens GN=ATP2A2 PE=1 SV=1;>sp|P16615-4|AT2. 0  
P16989;P16989-3;P16989 DBPA\_HUMAN DNA-binding protein A OS=Homo sapiens GN=CSDA PE=1 SV=4;>sp|P16989-3|DBPA\_HUMAN Isoform 3 of DNA-bindin 0  
P17050;B8ZZ36;B8ZZ35 NAGAB\_HUMAN Alpha-N-acetylgalactosaminidase OS=Homo sapiens GN=NAGA PE=1 SV=2;>tr|B8ZZ36|B8ZZ36\_HUMAN N-acetylgal. 1.03E-13  
P17066;P48741 HSP76\_HUMAN Heat shock 70 kDa protein 6 OS=Homo sapiens GN=HSPA6 PE=1 SV=2;>sp|P48741|HSP77\_HUMAN Putative heat shc 0  
P17096-3;P17096;P17096 3|HMGA1\_HUMAN Isoform HMG-R of High mobility group protein HMG-I/HMG-Y OS=Homo sapiens GN=HMGA1;>sp|P17096|HMGA1\_I 6.48E-15  
P17152;B7Z587 TMM11\_HUMAN Transmembrane protein 11 OS=Homo sapiens GN=TMEM11 PE=1 SV=1;>tr|B7Z587|B7Z587\_HUMAN cDNA FLJ51273 2.95E-06  
P17174;B7Z7E9;Q2TU84;IAATC\_HUMAN Aspartate aminotransferase, cytoplasmic OS=Homo sapiens GN=GOT1 PE=1 SV=3;>tr|B7Z7E9|B7Z7E9\_HUMAN Aspart 5.77E-265  
P17252;P05771-2;P05771 KPCA\_HUMAN Protein kinase C alpha type OS=Homo sapiens GN=PRKCA PE=1 SV=4;>sp|P05771-2|KPCB\_HUMAN Isoform Beta-II of 2.67E-37  
P17612;P17612-2 KAPCA\_HUMAN cAMP-dependent protein kinase catalytic subunit alpha OS=Homo sapiens GN=PRKACA PE=1 SV=2;>sp|P17612-2|KA 1.13E-47  
P17612;P17612-2;P22694 KAPCA\_HUMAN cAMP-dependent protein kinase catalytic subunit alpha OS=Homo sapiens GN=PRKACA PE=1 SV=2;>sp|P17612-2|KA 1.19E-43  
P17858;P17858-2;Q7L2M;K6PL\_HUMAN 6-phosphofructokinase, liver type OS=Homo sapiens GN=PFKL PE=1 SV=6;>sp|P17858-2|K6PL\_HUMAN Isoform 2 of 6- 0  
P18074;A8MX75;Q2TB79; ERCC2\_HUMAN TFIIH basal transcription factor complex helicase XPD subunit OS=Homo sapiens GN=ERCC2 PE=1 SV=1;>tr|A8MX75 3.21E-06



|                             |                                                                                                                           |           |
|-----------------------------|---------------------------------------------------------------------------------------------------------------------------|-----------|
| P18077;C9K025               | RL35A_HUMAN 60S ribosomal protein L35a OS=Homo sapiens GN=RPL35A PE=1 SV=2;>tr C9K025 C9K025_HUMAN Uncharacterized        | 1.04E-49  |
| P18084;D3DNA1               | ITB5_HUMAN Integrin beta-5 OS=Homo sapiens GN=ITGB5 PE=1 SV=1;>tr D3DNA1 D3DNA1_HUMAN Integrin beta OS=Homo sapie         | 1.55E-14  |
| P18085;C9JPM4;C9JAK5        | ARF4_HUMAN ADP-ribosylation factor 4 OS=Homo sapiens GN=ARF4 PE=1 SV=3;>tr C9JPM4 C9JPM4_HUMAN Uncharacterized protei     | 6.79E-131 |
| P18124;A8MUD9;O95036        | RL7_HUMAN 60S ribosomal protein L7 OS=Homo sapiens GN=RPL7 PE=1 SV=1;>tr A8MUD9 A8MUD9_HUMAN Uncharacterized protei       | 1.34E-97  |
| P18206;P18206-2;B3KXA       | VINC_HUMAN Vinculin OS=Homo sapiens GN=VCL PE=1 SV=4;>sp P18206-2 VINC_HUMAN Isoform 1 of Vinculin OS=Homo sapiens        | 0         |
| P18428;Q8TCF0               | LBP_HUMAN Lipopolysaccharide-binding protein OS=Homo sapiens GN=LBP PE=1 SV=3;>tr Q8TCF0 Q8TCF0_HUMAN LBP protein OS=     | 2.42E-16  |
| P18440;Q09LL5;Q6U7I7;CARY1  | HUMAN Arylamine N-acetyltransferase 1 OS=Homo sapiens GN=NAT1 PE=1 SV=2;>tr Q09LL5 Q09LL5_HUMAN NAT1 (Fragmen             | 4.46E-113 |
| P18621;B4E3C2;B5ME31        | RL17_HUMAN 60S ribosomal protein L17 OS=Homo sapiens GN=RPL17 PE=1 SV=3;>tr B4E3C2 B4E3C2_HUMAN cDNA FLJ52184, hig        | 2.58E-164 |
| P18669;Q53G35;Q6FHU2;PGAM1  | HUMAN Phosphoglycerate mutase 1 OS=Homo sapiens GN=PGAM1 PE=1 SV=2;>tr Q53G35 Q53G35_HUMAN Phosphoglycera                 | 1.59E-157 |
| P18858;B4DTU4;B4DM52;DNLI1  | HUMAN DNA ligase 1 OS=Homo sapiens GN=LIG1 PE=1 SV=1;>tr B4DTU4 B4DTU4_HUMAN DNA ligase OS=Homo sapiens PE                | 4.87E-18  |
| P19338;B3KTP9;Q6ZS99;INUCL  | HUMAN Nucleolin OS=Homo sapiens GN=NCL PE=1 SV=3;>tr B3KTP9 B3KTP9_HUMAN cDNA FLJ38578 fis, clone HCHON20076              | 0         |
| P19652;Q5T538;Q6IB74;EA1AG2 | HUMAN Alpha-1-acid glycoprotein 2 OS=Homo sapiens GN=ORM2 PE=1 SV=2;>tr Q5T538 Q5T538_HUMAN Orosomuroid 2 O               | 3.17E-182 |
| P19827;B7Z549;B7Z539        | ITIH1_HUMAN Inter-alpha-trypsin inhibitor heavy chain H1 OS=Homo sapiens GN=ITIH1 PE=1 SV=3;>tr B7Z549 B7Z549_HUMAN cD    | 0         |
| P20036;Q5STP1;A2ABA5;DPA1   | HUMAN HLA class II histocompatibility antigen, DP alpha 1 chain OS=Homo sapiens GN=HLA-DPA1 PE=1 SV=1;>tr Q5STP1 Q5       | 1.20E-14  |
| P20039;Q95IE3               | 2B1B_HUMAN HLA class II histocompatibility antigen, DRB1-11 beta chain OS=Homo sapiens GN=HLA-DRB1 PE=1 SV=1;>sp Q95IE3   | 1.05E-118 |
| P20042;A6NK07               | IF2B_HUMAN Eukaryotic translation initiation factor 2 subunit 2 OS=Homo sapiens GN=EIF2S2 PE=1 SV=2;>sp A6NK07 IF2BL_HUMA | 7.33E-127 |
| P20042;Q6IBR8;B5BU01;IF2B   | HUMAN Eukaryotic translation initiation factor 2 subunit 2 OS=Homo sapiens GN=EIF2S2 PE=1 SV=2;>tr Q6IBR8 Q6IBR8_HUM      | 1.36E-292 |
| P20132;Q8WW81               | SDHL_HUMAN L-serine dehydratase/L-threonine deaminase OS=Homo sapiens GN=SDS PE=1 SV=2;>tr Q8WW81 Q8WW81_HUMAN            | 4.89E-05  |
| P20226;Q32MN7;Q5U0C8        | TBP_HUMAN TATA-box-binding protein OS=Homo sapiens GN=TBP PE=1 SV=2;>tr Q32MN7 Q32MN7_HUMAN TATA box binding protei       | 7.22E-06  |
| P20339;Q6FI44;B4DJA5        | RAB5A_HUMAN Ras-related protein Rab-5A OS=Homo sapiens GN=RAB5A PE=1 SV=2;>tr Q6FI44 Q6FI44_HUMAN Cervical cancer or      | 2.14E-28  |
| P20618;Q53FT8;Q59GN1        | PSB1_HUMAN Proteasome subunit beta type-1 OS=Homo sapiens GN=PSMB1 PE=1 SV=2;>tr Q53FT8 Q53FT8_HUMAN Proteasome b         | 2.82E-142 |
| P20700;Q6DC98               | LMNB1_HUMAN Lamin-B1 OS=Homo sapiens GN=LMNB1 PE=1 SV=2;>tr Q6DC98 Q6DC98_HUMAN LMNB1 protein (Fragment) OS=H             | 0         |
| P20810-6;P20810-7;P208      | 6 ICAL_HUMAN Isoform 6 of Calpastatin OS=Homo sapiens GN=CAST;>sp P20810-7 ICAL_HUMAN Isoform 7 of Calpastatin OS=Hom     | 2.21E-106 |
| P20810-6;P20810-7;P208      | 6 ICAL_HUMAN Isoform 6 of Calpastatin OS=Homo sapiens GN=CAST;>sp P20810-7 ICAL_HUMAN Isoform 7 of Calpastatin OS=Hom     | 1.88E-17  |
| P20936;P20936-2             | RASA1_HUMAN Ras GTPase-activating protein 1 OS=Homo sapiens GN=RASA1 PE=1 SV=1;>sp P20936-2 RASA1_HUMAN Isoform 2         | 2.02E-188 |
| P21266;Q6FGJ9;Q59EJ5;A      | GSTM3_HUMAN Glutathione S-transferase Mu 3 OS=Homo sapiens GN=GSTM3 PE=1 SV=3;>tr Q6FGJ9 Q6FGJ9_HUMAN GSTM3 prote         | 8.51E-123 |
| P21281;P15313               | VATB2_HUMAN V-type proton ATPase subunit B, brain isoform OS=Homo sapiens GN=ATP6V1B2 PE=1 SV=3;>sp P15313 VATB1_HUM      | 8.63E-33  |
| P21283;A8MQ60;B7Z593        | VATC1_HUMAN V-type proton ATPase subunit C 1 OS=Homo sapiens GN=ATP6V1C1 PE=1 SV=4;>tr A8MQ60 A8MQ60_HUMAN Uncha          | 8.60E-68  |
| P21291;Q5U0J2;B4DY28;CSR    | P1_HUMAN Cysteine and glycine-rich protein 1 OS=Homo sapiens GN=CSR1 PE=1 SV=3;>tr Q5U0J2 Q5U0J2_HUMAN Cysteine           | 7.99E-217 |
| P21333;P21333-2;Q5HY5       | FLNA_HUMAN Filamin-A OS=Homo sapiens GN=FLNA PE=1 SV=4;>sp P21333-2 FLNA_HUMAN Isoform 2 of Filamin-A OS=Homo sapi        | 0         |
| P21397;Q49A63;Q53EZ0;AO     | FA_HUMAN Amine oxidase [flavin-containing] A OS=Homo sapiens GN=MAOA PE=1 SV=1;>tr Q49A63 Q49A63_HUMAN Monoamin           | 1.26E-15  |
| P21579;Q8N9I0               | SYT1_HUMAN Synaptotagmin-1 OS=Homo sapiens GN=SYT1 PE=1 SV=1;>sp Q8N9I0 SYT2_HUMAN Synaptotagmin-2 OS=Homo sap            | 1.13E-11  |
| P21695;B2R6C0               | GPD1_HUMAN Glycerol-3-phosphate dehydrogenase [NAD+], cytoplasmic OS=Homo sapiens GN=GPD1 PE=1 SV=4;>tr B2R6C0 B2R6       | 6.97E-116 |
| P21741;Q2LEK4               | MK_HUMAN Midkine OS=Homo sapiens GN=MDK PE=1 SV=1;>tr Q2LEK4 Q2LEK4_HUMAN Mutant truncated midkine A OS=Homo sa           | 3.36E-09  |
| P21912;Q0QEY7               | DHSB_HUMAN Succinate dehydrogenase [ubiquinone] iron-sulfur subunit, mitochondrial OS=Homo sapiens GN=SDHB PE=1 SV=3;>tr  | 1.01E-22  |
| P22059;B4DR25               | OSBP1_HUMAN Oxysterol-binding protein 1 OS=Homo sapiens GN=OSBP PE=1 SV=1;>tr B4DR25 B4DR25_HUMAN Oxysterol-binding       | 3.36E-37  |
| P22061-2;P22061;B7Z972      | PIMT_HUMAN Isoform 2 of Protein-L-isoaspartate(D-aspartate) O-methyltransferase OS=Homo sapiens GN=PCMT1;>sp P22061 PIM   | 1.11E-28  |
| P22102;P22102-2             | PUR2_HUMAN Trifunctional purine biosynthetic protein adenosine-3 OS=Homo sapiens GN=GART PE=1 SV=1;>sp P22102-2 PUR2_HL   | 0         |
| P22234;Q68CQ5;B4DGX3;PUR    | 6_HUMAN Multifunctional protein ADE2 OS=Homo sapiens GN=PAICS PE=1 SV=3;>tr Q68CQ5 Q68CQ5_HUMAN Putative unchara          | 0         |
| P22314;B4DDE4               | UBA1_HUMAN Ubiquitin-like modifier-activating enzyme 1 OS=Homo sapiens GN=UBA1 PE=1 SV=3;>tr B4DDE4 B4DDE4_HUMAN cD       | 0         |
| P22392-2;P22392;O603612     | NDKB_HUMAN Isoform 3 of Nucleoside diphosphate kinase B OS=Homo sapiens GN=NME2;>sp P22392 NDKB_HUMAN Nucleoside c        | 2.42E-193 |
| P22413;B2RBY8               | ENPP1_HUMAN Ectonucleotide pyrophosphatase/phosphodiesterase family member 1 OS=Homo sapiens GN=ENPP1 PE=1 SV=2;>tr B     | 3.50E-08  |
| P22528;P35321               | SPR1B_HUMAN Cornifin-B OS=Homo sapiens GN=SPRR1B PE=1 SV=2;>sp P35321 SPR1A_HUMAN Cornifin-A OS=Homo sapiens GN=          | 3.83E-98  |
| P22626;P22626-2;B8ZZ37      | ROA2_HUMAN Heterogeneous nuclear ribonucleoproteins A2/B1 OS=Homo sapiens GN=HNRNPA2B1 PE=1 SV=2;>sp P22626-2 ROA2        | 1.19E-168 |
| P22676;A6NER6;A8MY71        | CALB2_HUMAN Calretinin OS=Homo sapiens GN=CALB2 PE=1 SV=2;>tr A6NER6 A6NER6_HUMAN Calbindin 2, 29kDa (Calretinin), isc    | 1.46E-18  |
| P23141-2;P23141;B7Z795      | 2 EST1_HUMAN Isoform 2 of Liver carboxylesterase 1 OS=Homo sapiens GN=CES1;>sp P23141 EST1_HUMAN Liver carboxylesterase   | 1.80E-158 |
| P23142;P23142-3;Q8NBH       | FBLN1_HUMAN Fibulin-1 OS=Homo sapiens GN=FBLN1 PE=1 SV=4;>sp P23142-3 FBLN1_HUMAN Isoform B of Fibulin-1 OS=Homo sa       | 0         |
| P23193;P23193-2             | TCEA1_HUMAN Transcription elongation factor A protein 1 OS=Homo sapiens GN=TCEA1 PE=1 SV=2;>sp P23193-2 TCEA1_HUMAN Is    | 5.87E-96  |
| P23229;P23229-6;P23229      | ITA6_HUMAN Integrin alpha-6 OS=Homo sapiens GN=ITGA6 PE=1 SV=4;>sp P23229-6 ITA6_HUMAN Isoform Alpha-6X1X2A of Integ      | 3.35E-244 |
| P23246;Q86VG2;Q9BSV4;SFP    | Q_HUMAN Splicing factor, proline- and glutamine-rich OS=Homo sapiens GN=SFPQ PE=1 SV=2;>tr Q86VG2 Q86VG2_HUMAN Spli       | 2.28E-184 |
| P23258;Q9NRH3               | TBG1_HUMAN Tubulin gamma-1 chain OS=Homo sapiens GN=TUBG1 PE=1 SV=2;>sp Q9NRH3 TBG2_HUMAN Tubulin gamma-2 chair           | 1.63E-17  |
| P23368;B2R8J2;Q9BWL6        | MAOM_HUMAN NAD-dependent malic enzyme, mitochondrial OS=Homo sapiens GN=ME2 PE=1 SV=1;>tr B2R8J2 B2R8J2_HUMAN Ma          | 1.28E-75  |
| P23396;Q53G83;Q9NQS8;RS     | 3_HUMAN 40S ribosomal protein S3 OS=Homo sapiens GN=RPS3 PE=1 SV=2;>tr Q53G83 Q53G83_HUMAN Ribosomal protein S3           | 3.98E-154 |
| P23434;Q53XL7;Q6IAT2;G      | CSH_HUMAN Glycine cleavage system H protein, mitochondrial OS=Homo sapiens GN=GCSH PE=1 SV=2;>tr Q53XL7 Q53XL7_HUM        | 2.67E-77  |
| P23497;Q53TD0;P23497-       | SP100_HUMAN Nuclear autoantigen Sp-100 OS=Homo sapiens GN=SP100 PE=1 SV=3;>tr Q53TD0 Q53TD0_HUMAN Putative unchara        | 4.10E-56  |
| P23528;B4E112               | COF1_HUMAN Cofilin-1 OS=Homo sapiens GN=CFL1 PE=1 SV=3;>tr B4E112 B4E112_HUMAN cDNA FLJ51435, moderately similar to       | 0         |
| P23634;P23634-8;P23634      | AT2B4_HUMAN Plasma membrane calcium-transporting ATPase 4 OS=Homo sapiens GN=ATP2B4 PE=1 SV=2;>sp P23634-8 AT2B4_H        | 5.77E-105 |
| P23743;B4E0C6;Q3ZE25;D      | GKA_HUMAN Diacylglycerol kinase alpha OS=Homo sapiens GN=DGKA PE=1 SV=3;>tr B4E0C6 B4E0C6_HUMAN cDNA FLJ58783, hi         | 2.01E-57  |
| P23743;P23743-2             | DGKA_HUMAN Diacylglycerol kinase alpha OS=Homo sapiens GN=DGKA PE=1 SV=3;>sp P23743-2 DGKA_HUMAN Isoform 2 of Diacy       | 2.59E-46  |
| P23786;Q53G79               | CPT2_HUMAN Carnitine O-palmitoyltransferase 2, mitochondrial OS=Homo sapiens GN=CPT2 PE=1 SV=2;>tr Q53G79 Q53G79_HUM      | 3.80E-54  |
| P23919;Q53F55;Q6FGU2;K      | THY_HUMAN Thymidylate kinase OS=Homo sapiens GN=DTYMK PE=1 SV=4;>tr Q53F55 Q53F55_HUMAN Deoxythymidylate kinase           | 1.32E-53  |



P23921;Q53GZ5;B4DNN4;RIR1\_HUMAN Ribonucleoside-diphosphate reductase large subunit OS=Homo sapiens GN=RRM1 PE=1 SV=1;>tr|Q53GZ5|Q53GZ5\_HU 3.17E-68  
P23946;Q3SY37 CMA1\_HUMAN Chymase OS=Homo sapiens GN=CMA1 PE=1 SV=1;>tr|Q3SY37|Q3SY37\_HUMAN CMA1 protein OS=Homo sapiens GN: 4.16E-39  
P24468;P10589 COT2\_HUMAN COUP transcription factor 2 OS=Homo sapiens GN=NR2F2 PE=1 SV=1;>sp|P10589|COT1\_HUMAN COUP transcription f 9.53E-22  
P24534;A4D1M6 EF1B\_HUMAN Elongation factor 1-beta OS=Homo sapiens GN=EEF1B2 PE=1 SV=3;>tr|A4D1M6|A4D1M6\_HUMAN HCG19809 OS=Hon 5.56E-120  
P24666;P24666-3 PPAC\_HUMAN Low molecular weight phosphotyrosine protein phosphatase OS=Homo sapiens GN=ACP1 PE=1 SV=3;>sp|P24666-3|PF 1.24E-30  
P24821;P24821-3;P24821 TENA\_HUMAN Tenascin OS=Homo sapiens GN=TNC PE=1 SV=3;>sp|P24821-3|TENA\_HUMAN Isoform 3 of Tenascin OS=Homo sapien 0  
P24844;O14950;P19105 MYL9\_HUMAN Myosin regulatory light polypeptide 9 OS=Homo sapiens GN=MYL9 PE=1 SV=4;>sp|O14950|ML12B\_HUMAN Myosin re 3.08E-261  
P24928;B4E3V7 RPB1\_HUMAN DNA-directed RNA polymerase II subunit RPB1 OS=Homo sapiens GN=POLR2A PE=1 SV=2;>tr|B4E3V7|B4E3V7\_HUMA 5.84E-05  
P25325;Q6FHN9;B3KP52;THTM\_HUMAN 3-mercaptopyruvate sulfurtransferase OS=Homo sapiens GN=MPST PE=1 SV=3;>tr|Q6FHN9|Q6FHN9\_HUMAN MPST pi 1.85E-14  
P25490;O15391 TYY1\_HUMAN Transcriptional repressor protein YY1 OS=Homo sapiens GN=YY1 PE=1 SV=2;>sp|O15391|TYY2\_HUMAN Transcription f 1.70E-07  
P25685;Q6FHS4;Q6FI51;DNJB1\_HUMAN DnaJ homolog subfamily B member 1 OS=Homo sapiens GN=DNAJB1 PE=1 SV=4;>tr|Q6FHS4|Q6FHS4\_HUMAN DNAJ 2.24E-105  
P25705;A8K092;B4DY56 ATPA\_HUMAN ATP synthase subunit alpha, mitochondrial OS=Homo sapiens GN=ATP5A1 PE=1 SV=1;>tr|A8K092|A8K092\_HUMAN AT 0  
P25786-2;P25786;Q53YE2|PSA1\_HUMAN Isoform Long of Proteasome subunit alpha type-1 OS=Homo sapiens GN=PSMA1;>sp|P25786|PSA1\_HUMAN Proteasc 7.70E-98  
P25787;Q53GF5 PSA2\_HUMAN Proteasome subunit alpha type-2 OS=Homo sapiens GN=PSMA2 PE=1 SV=2;>tr|Q53GF5|Q53GF5\_HUMAN Proteasome 4.96E-63  
P25788;Q6IB71;P25788-2 PSA3\_HUMAN Proteasome subunit alpha type-3 OS=Homo sapiens GN=PSMA3 PE=1 SV=2;>tr|Q6IB71|Q6IB71\_HUMAN Proteasome 2.96E-41  
P25815;Q5J7W2 S100P\_HUMAN Protein S100-P OS=Homo sapiens GN=S100P PE=1 SV=2;>tr|Q5J7W2|Q5J7W2\_HUMAN Migration-inducing gene 9 pr 1.05E-32  
P26038;Q6PJT4 MOES\_HUMAN Moesin OS=Homo sapiens GN=MSN PE=1 SV=3;>tr|Q6PJT4|Q6PJT4\_HUMAN MSN protein (Fragment) OS=Homo sapie 0  
P26196;B2R858;Q8IV96 DDX6\_HUMAN Probable ATP-dependent RNA helicase DDX6 OS=Homo sapiens GN=DDX6 PE=1 SV=2;>tr|B2R858|B2R858\_HUMAN cI 1.10E-96  
P26358-2;P26358;Q59FP72|DNMT1\_HUMAN Isoform 2 of DNA (cytosine-5)-methyltransferase 1 OS=Homo sapiens GN=DNMT1;>sp|P26358|DNMT1\_HUMAN DN 4.85E-57  
P26368;P26368-2;B5BU25 U2AF2\_HUMAN Splicing factor U2AF 65 kDa subunit OS=Homo sapiens GN=U2AF2 PE=1 SV=4;>sp|P26368-2|U2AF2\_HUMAN Isoform 0  
P26440;Q53XZ9;B3KVI7 IVD\_HUMAN Isovaleryl-CoA dehydrogenase, mitochondrial OS=Homo sapiens GN=IVD PE=1 SV=1;>tr|Q53XZ9|Q53XZ9\_HUMAN Isov 3.06E-39  
P26639;Q53GX7;Q5M7Z9;SYTC\_HUMAN Threonyl-tRNA synthetase, cytoplasmic OS=Homo sapiens GN=TARS PE=1 SV=3;>tr|Q53GX7|Q53GX7\_HUMAN Threon 0  
P26641;Q53YD7;B4DTG2;EF1G\_HUMAN Elongation factor 1-gamma OS=Homo sapiens GN=EEF1G PE=1 SV=3;>tr|Q53YD7|Q53YD7\_HUMAN EEF1G protein OS 0  
P26885;Q53XJ5 FKBP2\_HUMAN Peptidyl-prolyl cis-trans isomerase FKBP2 OS=Homo sapiens GN=FKBP2 PE=1 SV=2;>tr|Q53XJ5|Q53XJ5\_HUMAN FK5 9.30E-71  
P27105;B4DZK8;B4E2V5 STOM\_HUMAN Erythrocyte band 7 integral membrane protein OS=Homo sapiens GN=STOM PE=1 SV=3;>tr|B4DZK8|B4DZK8\_HUMAN 8.31E-215  
P27169;B4DX19 PON1\_HUMAN Serum paraoxonase/arylesterase 1 OS=Homo sapiens GN=PON1 PE=1 SV=3;>tr|B4DX19|B4DX19\_HUMAN cDNA FLJ5; 5.77E-84  
P27361;Q8NHX1;Q7Z3H5;MK03\_HUMAN Mitogen-activated protein kinase 3 OS=Homo sapiens GN=MAPK3 PE=1 SV=4;>tr|Q8NHX1|Q8NHX1\_HUMAN Extracellu 7.14E-40  
P27635;Q96L21 RL10\_HUMAN 60S ribosomal protein L10 OS=Homo sapiens GN=RPL10 PE=1 SV=4;>sp|Q96L21|RL10L\_HUMAN 60S ribosomal protei 2.54E-175  
P27695;Q5TZP7 APEX1\_HUMAN DNA-(apurinic or apyrimidinic site) lyase OS=Homo sapiens GN=APEX1 PE=1 SV=2;>tr|Q5TZP7|Q5TZP7\_HUMAN APE 8.64E-83  
P27707;D6RFG8;D6RCP9 DCK\_HUMAN Deoxycytidine kinase OS=Homo sapiens GN=DCK PE=1 SV=1;>tr|D6RFG8|D6RFG8\_HUMAN Uncharacterized protein OS 4.97E-10  
P27797;Q53G71;B4DHR1;CALR\_HUMAN Calreticulin OS=Homo sapiens GN=CALR PE=1 SV=1;>tr|Q53G71|Q53G71\_HUMAN Calreticulin variant (Fragment) OS= 0  
P28062;Q5QNR8;P28062- PSB8\_HUMAN Proteasome subunit beta type-8 OS=Homo sapiens GN=PSMB8 PE=1 SV=2;>tr|Q5QNR8|Q5QNR8\_HUMAN Proteasome 2.81E-19  
P28065;Q5JNW4;P28065- PSB9\_HUMAN Proteasome subunit beta type-9 OS=Homo sapiens GN=PSMB9 PE=1 SV=2;>tr|Q5JNW4|Q5JNW4\_HUMAN Proteasome 7.88E-09  
P28066;Q5U0A0;B4E2V4 PSA5\_HUMAN Proteasome subunit alpha type-5 OS=Homo sapiens GN=PSMA5 PE=1 SV=3;>tr|Q5U0A0|Q5U0A0\_HUMAN Proteasome 4.85E-126  
P28070;B4DFL3 PSB4\_HUMAN Proteasome subunit beta type-4 OS=Homo sapiens GN=PSMB4 PE=1 SV=4;>tr|B4DFL3|B4DFL3\_HUMAN cDNA FLJ566 3.13E-106  
P28072;Q6IAT9 PSB6\_HUMAN Proteasome subunit beta type-6 OS=Homo sapiens GN=PSMB6 PE=1 SV=4;>tr|Q6IAT9|Q6IAT9\_HUMAN Proteasome su 2.52E-11  
P28161;Q0D2I8;A6NGW8;GSTM2\_HUMAN Glutathione S-transferase Mu 2 OS=Homo sapiens GN=GSTM2 PE=1 SV=2;>tr|Q0D2I8|Q0D2I8\_HUMAN Glutathione 2.89E-84  
P28347;Q15562;Q99594;TEAD1\_HUMAN Transcriptional enhancer factor TEF-1 OS=Homo sapiens GN=TEAD1 PE=1 SV=2;>sp|Q15562|TEAD2\_HUMAN Transcr 1.18E-10  
P28482;P27361 MK01\_HUMAN Mitogen-activated protein kinase 1 OS=Homo sapiens GN=MAPK1 PE=1 SV=3;>sp|P27361|MK03\_HUMAN Mitogen-acti 1.39E-25  
P28482;Q1HBJ4;B4DHN0;MK01\_HUMAN Mitogen-activated protein kinase 1 OS=Homo sapiens GN=MAPK1 PE=1 SV=3;>tr|Q1HBJ4|Q1HBJ4\_HUMAN Mitogen-ac 1.19E-81  
P28676;B7Z322;C9JGR8 GRAN\_HUMAN Grancalcin OS=Homo sapiens GN=GCA PE=1 SV=2;>tr|B7Z322|B7Z322\_HUMAN cDNA FLJ52146, highly similar to Gra 5.85E-25  
P28838;P28838-2;B4DQG AMPL\_HUMAN Cytosol aminopeptidase OS=Homo sapiens GN=LAP3 PE=1 SV=3;>sp|P28838-2|AMPL\_HUMAN Isoform 2 of Cytosol an 0  
P28907;P28907-2 CD38\_HUMAN ADP-ribosyl cyclase 1 OS=Homo sapiens GN=CD38 PE=1 SV=2;>sp|P28907-2|CD38\_HUMAN Isoform 2 of ADP-ribosyl 2.64E-55  
P29034;Q5RHS7 S10A2\_HUMAN Protein S100-A2 OS=Homo sapiens GN=S100A2 PE=1 SV=3;>tr|Q5RHS7|Q5RHS7\_HUMAN S100 calcium binding prot 2.19E-11  
P29083;Q53F88;C9IYL4 T2EA\_HUMAN General transcription factor IIE subunit 1 OS=Homo sapiens GN=GTF2E1 PE=1 SV=2;>tr|Q53F88|Q53F88\_HUMAN Gen 4.50E-05  
P29317;B4DL04 EPHA2\_HUMAN Ephrin type-A receptor 2 OS=Homo sapiens GN=EPHA2 PE=1 SV=2;>tr|B4DL04|B4DL04\_HUMAN cDNA FLJ51229, hig 0  
P29353-6;P29353;P293536|SHC1\_HUMAN Isoform 6 of SHC-transforming protein 1 OS=Homo sapiens GN=SHC1;>sp|P29353|SHC1\_HUMAN SHC-transforming 1.60E-06  
P29373;Q5SYZ4 RABP2\_HUMAN Cellular retinoic acid-binding protein 2 OS=Homo sapiens GN=CRABP2 PE=1 SV=2;>tr|Q5SYZ4|Q5SYZ4\_HUMAN Cellu 3.11E-274  
P29728;P29728-2;A8KA41 OAS2\_HUMAN 2-5-oligoadenylate synthase 2 OS=Homo sapiens GN=OAS2 PE=1 SV=3;>sp|P29728-2|OAS2\_HUMAN Isoform p69 of : 8.76E-227  
P29992;Q59FM5 GNA11\_HUMAN Guanine nucleotide-binding protein subunit alpha-11 OS=Homo sapiens GN=GNA11 PE=1 SV=2;>tr|Q59FM5|Q59FM5 8.48E-88  
P30038;D2D4A3;B4DGE4 AL4A1\_HUMAN Delta-1-pyrroline-5-carboxylate dehydrogenase, mitochondrial OS=Homo sapiens GN=ALDH4A1 PE=1 SV=3;>tr|D2D4 4.27E-90  
P30044;P30044-2;A6NG01 PRDX5\_HUMAN Peroxiredoxin-5, mitochondrial OS=Homo sapiens GN=PRDX5 PE=1 SV=4;>sp|P30044-2|PRDX5\_HUMAN Isoform Cyt 8.60E-102  
P30046;A6NHG4 DOPD\_HUMAN D-dopachrome decarboxylase OS=Homo sapiens GN=DDT PE=1 SV=3;>sp|A6NHG4|DDTL\_HUMAN D-dopachrome dec 8.93E-42  
P30046;Q53Y51;B4E259;DOPD\_HUMAN D-dopachrome decarboxylase OS=Homo sapiens GN=DDT PE=1 SV=3;>tr|Q53Y51|Q53Y51\_HUMAN D-dopachrome ta 4.00E-14  
P30101;B3KQT9;B3KQT2;PDIA3\_HUMAN Protein disulfide-isomerase A3 OS=Homo sapiens GN=PDIA3 PE=1 SV=4;>tr|B3KQT9|B3KQT9\_HUMAN cDNA PSEC01; 0  
P30154-2;P30154 2|2AAB\_HUMAN Isoform 2 of Serine/threonine-protein phosphatase 2A 65 kDa regulatory subunit A beta isoform OS=Homo sapiens G 1.79E-15  
P30260;B4DL80 CDC27\_HUMAN Cell division cycle protein 27 homolog OS=Homo sapiens GN=CDC27 PE=1 SV=2;>tr|B4DL80|B4DL80\_HUMAN cDNA 7.58E-07  
P30419;Q96HI4;P30419-2 NMT1\_HUMAN Glycylpeptide N-tetradecanoyltransferase 1 OS=Homo sapiens GN=NMT1 PE=1 SV=2;>tr|Q96HI4|Q96HI4\_HUMAN Gly 6.00E-296  
P30443;P30455 1A01\_HUMAN HLA class I histocompatibility antigen, A-1 alpha chain OS=Homo sapiens GN=HLA-A PE=1 SV=1;>sp|P30455|1A36\_HL 3.04E-171  
P30453;P18462;P30450;P 1A34\_HUMAN HLA class I histocompatibility antigen, A-34 alpha chain OS=Homo sapiens GN=HLA-A PE=1 SV=1;>sp|P18462|1A25\_H 0  
P30480;P30462 1B42\_HUMAN HLA class I histocompatibility antigen, B-42 alpha chain OS=Homo sapiens GN=HLA-B PE=1 SV=1;>sp|P30462|1B14\_H 2.11E-99

P30483;A9QUT8;Q6IVJ2;L1B45\_HUMAN HLA class I histocompatibility antigen, B-45 alpha chain OS=Homo sapiens GN=HLA-B PE=2 SV=1;>tr|A9QUT8|A9QUT8 4.92E-66  
P30483;P30487;P30488 1B45\_HUMAN HLA class I histocompatibility antigen, B-45 alpha chain OS=Homo sapiens GN=HLA-B PE=2 SV=1;>sp|P30487|1B49\_1 0  
P30486;Q31610 1B48\_HUMAN HLA class I histocompatibility antigen, B-48 alpha chain OS=Homo sapiens GN=HLA-B PE=1 SV=1;>sp|Q31610|1B81\_1 3.43E-98  
P30487;P30488 1B49\_HUMAN HLA class I histocompatibility antigen, B-49 alpha chain OS=Homo sapiens GN=HLA-B PE=2 SV=2;>sp|P30488|1B50\_1 1.74E-159  
P30491;P30685;P18464;P1B53\_HUMAN HLA class I histocompatibility antigen, B-53 alpha chain OS=Homo sapiens GN=HLA-B PE=1 SV=1;>sp|P30685|1B35\_1 2.17E-99  
P30508;P30510;Q07000;F1C12\_HUMAN HLA class I histocompatibility antigen, Cw-12 alpha chain OS=Homo sapiens GN=HLA-C PE=1 SV=2;>sp|P30510|1C14\_1 3.21E-93  
P30508;Q07000;Q29960;I1C12\_HUMAN HLA class I histocompatibility antigen, Cw-12 alpha chain OS=Homo sapiens GN=HLA-C PE=1 SV=2;>sp|Q07000|1C15\_1 0  
P30511-3;P30511;P30511 3|HLAF\_HUMAN Isoform 3 of HLA class I histocompatibility antigen, alpha chain F OS=Homo sapiens GN=HLA-F;>sp|P30511|HLAF\_HL 1.56E-08  
P30520;B4E1L0 PURA2\_HUMAN Adenylosuccinate synthetase isozyme 2 OS=Homo sapiens GN=ADSS PE=1 SV=3;>tr|B4E1L0|B4E1L0\_HUMAN Adeny 2.94E-63  
P30566;Q71UA4;B4DP46;PUR8\_HUMAN Adenylosuccinate lyase OS=Homo sapiens GN=ADSL PE=1 SV=2;>tr|Q71UA4|Q71UA4\_HUMAN Adenylosuccinate lyase 6.22E-34  
P30740;B4E3A8;B4DNT0 ILEU\_HUMAN Leukocyte elastase inhibitor OS=Homo sapiens GN=SERPINB1 PE=1 SV=1;>tr|B4E3A8|B4E3A8\_HUMAN cDNA FLJ53963 7.43E-172  
P30876;B4DHJ3;C9J2Y9;ERP2\_HUMAN DNA-directed RNA polymerase II subunit RPB2 OS=Homo sapiens GN=POLR2B PE=1 SV=1;>tr|B4DHJ3|B4DHJ3\_HUMA 4.90E-43  
P31025;Q5VSP4 LCN1\_HUMAN Lipocalin-1 OS=Homo sapiens GN=LCN1 PE=1 SV=1;>sp|Q5VSP4|LC1L1\_HUMAN Putative lipocalin 1-like protein 1 OS= 1.59E-14  
P31040;B4DJ60;D6RFM5;DHSA\_HUMAN Succinate dehydrogenase [ubiquinone] flavoprotein subunit, mitochondrial OS=Homo sapiens GN=SDHA PE=1 SV=2;> 2.41E-266  
P31146;Q59G88 COR1A\_HUMAN Coronin-1A OS=Homo sapiens GN=CORO1A PE=1 SV=4;>tr|Q59G88|Q59G88\_HUMAN Putative uncharacterized prote 1.15E-233  
P31150;B4DHX4;B4DH24 GDIA\_HUMAN Rab GDP dissociation inhibitor alpha OS=Homo sapiens GN=GDI1 PE=1 SV=2;>tr|B4DHX4|B4DHX4\_HUMAN cDNA FLJ5 0  
P31323;Q6DHZ2;B3KY43;KAP3\_HUMAN cAMP-dependent protein kinase type II-beta regulatory subunit OS=Homo sapiens GN=PRKAR2B PE=1 SV=3;>tr|Q6DH 1.73E-14  
P31689;Q5T7Q0;Q86TL9 DNJA1\_HUMAN DnaJ homolog subfamily A member 1 OS=Homo sapiens GN=DNAJA1 PE=1 SV=2;>tr|Q5T7Q0|Q5T7Q0\_HUMAN DnaJ 1.72E-117  
P31751;Q0VAN0;B4DG79;AKT2\_HUMAN RAC-beta serine/threonine-protein kinase OS=Homo sapiens GN=AKT2 PE=1 SV=2;>tr|Q0VAN0|Q0VAN0\_HUMAN AKT2 6.68E-06  
P31930;B4DUL5 QCR1\_HUMAN Cytochrome b-c1 complex subunit 1, mitochondrial OS=Homo sapiens GN=UQCRC1 PE=1 SV=3;>tr|B4DUL5|B4DUL5\_ 2.67E-107  
P31937;Q546Z2 3HIDH\_HUMAN 3-hydroxyisobutyrate dehydrogenase, mitochondrial OS=Homo sapiens GN=HIBADH PE=1 SV=2;>tr|Q546Z2|Q546Z2 2.82E-131  
P31949;B2R5H0 S10AB\_HUMAN Protein S100-A11 OS=Homo sapiens GN=S100A11 PE=1 SV=2;>tr|B2R5H0|B2R5H0\_HUMAN cDNA, FLJ92471, highly 7.30E-125  
P32119;B4DF70;A6NIW5 PRDX2\_HUMAN Peroxiredoxin-2 OS=Homo sapiens GN=PRDX2 PE=1 SV=5;>tr|B4DF70|B4DF70\_HUMAN cDNA FLJ60461, highly simil 6.43E-60  
P32456;Q8TCE5 GBP2\_HUMAN Interferon-induced guanylate-binding protein 2 OS=Homo sapiens GN=GBP2 PE=2 SV=3;>tr|Q8TCE5|Q8TCE5\_HUMAN 2.47E-28  
P32929;P32929-2 CGL\_HUMAN Cystathionine gamma-lyase OS=Homo sapiens GN=CTH PE=1 SV=3;>sp|P32929-2|CGL\_HUMAN Isoform 2 of Cystathior 2.44E-12  
P32969;Q53Z07;D6RAN4;RL9\_HUMAN 60S ribosomal protein L9 OS=Homo sapiens GN=RPL9 PE=1 SV=1;>tr|Q53Z07|Q53Z07\_HUMAN NPC-A-16 OS=Homo sa 4.60E-82  
P33316;P33316-3;P33316 DUT\_HUMAN Deoxyuridine 5-triphosphate nucleotidohydrolase, mitochondrial OS=Homo sapiens GN=DUT PE=1 SV=3;>sp|P33316-3| 4.12E-27  
P34897;Q53ET4;B7Z9F1;GLYM\_HUMAN Serine hydroxymethyltransferase, mitochondrial OS=Homo sapiens GN=SHMT2 PE=1 SV=3;>tr|Q53ET4|Q53ET4\_HUM/ 2.75E-252  
P34949;P34949-2;B4DW5 MPI\_HUMAN Mannose-6-phosphate isomerase OS=Homo sapiens GN=MPI PE=1 SV=2;>sp|P34949-2|MPI\_HUMAN Isoform 2 of Mann 7.91E-49  
P35219;B4DFA0 CAH8\_HUMAN Carbonic anhydrase-related protein OS=Homo sapiens GN=CA8 PE=1 SV=3;>tr|B4DFA0|B4DFA0\_HUMAN cDNA FLJ574 1.73E-06  
P35221;P35221-2 CTNA1\_HUMAN Catenin alpha-1 OS=Homo sapiens GN=CTNNA1 PE=1 SV=1;>sp|P35221-2|CTNA1\_HUMAN Isoform 2 of Catenin alph 1.48E-225  
P35237;Q8IXH2;Q5TD02 SPB6\_HUMAN Serpin B6 OS=Homo sapiens GN=SERPINB6 PE=1 SV=3;>tr|Q8IXH2|Q8IXH2\_HUMAN MSTP057 OS=Homo sapiens PE= 1.71E-252  
P35251;P35251-2;Q14756 RFC1\_HUMAN Replication factor C subunit 1 OS=Homo sapiens GN=RFC1 PE=1 SV=4;>sp|P35251-2|RFC1\_HUMAN Isoform 2 of Repli 9.60E-15  
P35268;Q7Z4W8 RL22\_HUMAN 60S ribosomal protein L22 OS=Homo sapiens GN=RPL22 PE=1 SV=2;>tr|Q7Z4W8|Q7Z4W8\_HUMAN Heparin-binding p 6.57E-153  
P35269;Q6IBK5;B4DXY2;T2FA\_HUMAN General transcription factor IIF subunit 1 OS=Homo sapiens GN=GTF2F1 PE=1 SV=2;>tr|Q6IBK5|Q6IBK5\_HUMAN GTF2 5.00E-56  
P35442;Q6MZL6 TSP2\_HUMAN Thrombospondin-2 OS=Homo sapiens GN=THBS2 PE=1 SV=2;>tr|Q6MZL6|Q6MZL6\_HUMAN Putative uncharacterized p 1.40E-158  
P35520-2;P35520 2|CBS\_HUMAN Isoform 2 of Cystathionine beta-synthase OS=Homo sapiens GN=CBS;>sp|P35520|CBS\_HUMAN Cystathionine beta-sy 8.27E-12  
P35579;Q60FE2;Q86XU5;MYH9\_HUMAN Myosin-9 OS=Homo sapiens GN=MYH9 PE=1 SV=4;>tr|Q60FE2|Q60FE2\_HUMAN MYH9 variant protein OS=Homo sapi 0  
P35580-3;P35580;P35580 3|MYH10\_HUMAN Isoform 3 of Myosin-10 OS=Homo sapiens GN=MYH10;>sp|P35580|MYH10\_HUMAN Myosin-10 OS=Homo sapiens C 0  
P35606;B4DZI8 COPB2\_HUMAN Coatomer subunit beta OS=Homo sapiens GN=COPB2 PE=1 SV=2;>tr|B4DZI8|B4DZI8\_HUMAN Coatomer protein con 4.40E-51  
P35613;P35613-2;Q54A51 BASI\_HUMAN Basigin OS=Homo sapiens GN=BSG PE=1 SV=2;>sp|P35613-2|BASI\_HUMAN Isoform 2 of Basigin OS=Homo sapiens G 1.52E-215  
P35637;Q6IBQ5;Q8TBR3;FUS\_HUMAN RNA-binding protein FUS OS=Homo sapiens GN=FUS PE=1 SV=1;>tr|Q6IBQ5|Q6IBQ5\_HUMAN FUS protein OS=Homo s 2.17E-156  
P35659;B4DNW3;B4DFG0 DEK\_HUMAN Protein DEK OS=Homo sapiens GN=DEK PE=1 SV=1;>tr|B4DNW3|B4DNW3\_HUMAN cDNA FLJ51914, highly similar to P 2.85E-206  
P35813;P35813-2 PPM1A\_HUMAN Protein phosphatase 1A OS=Homo sapiens GN=PPM1A PE=1 SV=1;>sp|P35813-2|PPM1A\_HUMAN Isoform Alpha-2 of 5.99E-130  
P35914;Q6IBC0;B1AK13;HMGCL\_HUMAN Hydroxymethylglutaryl-CoA lyase, mitochondrial OS=Homo sapiens GN=HMGCL PE=1 SV=2;>tr|Q6IBC0|Q6IBC0\_HU 1.56E-38  
P35998;Q75L23;B7Z5E2 PRS7\_HUMAN 26S protease regulatory subunit 7 OS=Homo sapiens GN=PSMC2 PE=1 SV=3;>tr|Q75L23|Q75L23\_HUMAN Putative un 3.79E-134  
P36404;Q53YD8;B4DGG0 ARL2\_HUMAN ADP-ribosylation factor-like protein 2 OS=Homo sapiens GN=ARL2 PE=1 SV=4;>tr|Q53YD8|Q53YD8\_HUMAN ADP-ribos 1.57E-45  
P36507;B3KS97 MP2K2\_HUMAN Dual specificity mitogen-activated protein kinase 2 OS=Homo sapiens GN=MAP2K2 PE=1 SV=1;>tr|B3KS97|B3 7.82E-61  
P36542;Q6I9V2;Q8TAS0;FATPG\_HUMAN ATP synthase subunit gamma, mitochondrial OS=Homo sapiens GN=ATP5C1 PE=1 SV=1;>tr|Q6I9V2|Q6I9V2\_HUMAN / 2.00E-126  
P36543;Q53Y06;A8MUE4;VATE1\_HUMAN V-type proton ATPase subunit E 1 OS=Homo sapiens GN=ATP6V1E1 PE=1 SV=1;>tr|Q53Y06|Q53Y06\_HUMAN ATPase, 4.31E-33  
P36915;P36915-2 GNL1\_HUMAN Guanine nucleotide-binding protein-like 1 OS=Homo sapiens GN=GNL1 PE=1 SV=2;>sp|P36915-2|GNL1\_HUMAN Isofo 1.74E-12  
P36952;P36952-2 SPB5\_HUMAN Serpin B5 OS=Homo sapiens GN=SERPINB5 PE=1 SV=2;>sp|P36952-2|SPB5\_HUMAN Isoform 2 of Serpin B5 OS=Hom 1.14E-182  
P36957;Q6IBS5;B7Z5W8;ODO2\_HUMAN Dihydrolipoyllysine-residue succinyltransferase component of 2-oxoglutarate dehydrogenase complex, mitochondrial OS 1.15E-46  
P36969;Q6PI42;P36969-2 GPX4\_HUMAN Phospholipid hydroperoxide glutathione peroxidase, mitochondrial OS=Homo sapiens GN=GPX4 PE=1 SV=3;>tr|Q6PI42 3.71E-37  
P37235;P84074 HPCL1\_HUMAN Hippocalcin-like protein 1 OS=Homo sapiens GN=HPCAL1 PE=1 SV=3;>sp|P84074|HPCA\_HUMAN Neuron-specific calc 4.92E-138  
P37235;Q6FGY1;Q68CP5;HPCL1\_HUMAN Hippocalcin-like protein 1 OS=Homo sapiens GN=HPCAL1 PE=1 SV=3;>tr|Q6FGY1|Q6FGY1\_HUMAN HPCAL1 protein C 1.73E-66  
P37268;Q6IAX1;B4DJE5;FDFT\_HUMAN Squalene synthase OS=Homo sapiens GN=FDFT1 PE=1 SV=1;>tr|Q6IAX1|Q6IAX1\_HUMAN FDFT1 protein OS=Homo sa 1.77E-10  
P38159;Q96E39 HNRPG\_HUMAN Heterogeneous nuclear ribonucleoprotein G OS=Homo sapiens GN=RBMX PE=1 SV=3;>sp|Q96E39|RBMXL\_HUMAN H 1.70E-128  
P38646;B7Z4V2;Q8N1C8;GRP75\_HUMAN Stress-70 protein, mitochondrial OS=Homo sapiens GN=HSPA9 PE=1 SV=2;>tr|B7Z4V2|B7Z4V2\_HUMAN cDNA FLJ51 0  
P39023;Q96QL0;Q8TBW1;RL3\_HUMAN 60S ribosomal protein L3 OS=Homo sapiens GN=RPL3 PE=1 SV=2;>tr|Q96QL0|Q96QL0\_HUMAN Ribosomal protein L3 O 4.23E-175  
P39060;P39060-1;P39060 COIA1\_HUMAN Collagen alpha-1(XVIII) chain OS=Homo sapiens GN=COL18A1 PE=1 SV=5;>sp|P39060-1|COIA1\_HUMAN Isoform 2 c 4.84E-189

P39656;B4DLI2;B4DJE3 OST48\_HUMAN Dolichyl-diphosphooligosaccharide--protein glycosyltransferase 48 kDa subunit OS=Homo sapiens GN=DDOST PE=1 S 3.28E-119  
P39687;Q08AJ6;Q6PKH8;AN32A\_HUMAN Acidic leucine-rich nuclear phosphoprotein 32 family member A OS=Homo sapiens GN=ANP32A PE=1 SV=1;>tr|Q08A 9.70E-45  
P39748;Q6FHX6;B4DWZ4 FEN1\_HUMAN Flap endonuclease 1 OS=Homo sapiens GN=FEN1 PE=1 SV=1;>tr|Q6FHX6|Q6FHX6\_HUMAN FEN1 protein OS=Homo sa 2.53E-270  
P40123;Q9BYW9;B7Z4M3 CAP2\_HUMAN Adenylyl cyclase-associated protein 2 OS=Homo sapiens GN=CAP2 PE=1 SV=1;>tr|Q9BYW9|Q9BYW9\_HUMAN Adenyly 5.68E-60  
P40261;Q6FH49 NNMT\_HUMAN Nicotinamide N-methyltransferase OS=Homo sapiens GN=NNMT PE=1 SV=1;>tr|Q6FH49|Q6FH49\_HUMAN NNMT prote 2.04E-175  
P40306;Q6IB22 PSB10\_HUMAN Proteasome subunit beta type-10 OS=Homo sapiens GN=PSMB10 PE=1 SV=1;>tr|Q6IB22|Q6IB22\_HUMAN Proteasom 4.55E-12  
P40429;Q5QTS3;Q9BSQ6;RL13A\_HUMAN 60S ribosomal protein L13a OS=Homo sapiens GN=RPL13A PE=1 SV=2;>tr|Q5QTS3|Q5QTS3\_HUMAN FWP004 OS=Ho 1.18E-59  
P40429;Q6NVV1 RL13A\_HUMAN 60S ribosomal protein L13a OS=Homo sapiens GN=RPL13A PE=1 SV=2;>sp|Q6NVV1|RL13AX\_HUMAN Putative 60S rib 2.31E-95  
P40616;B4DWW1;B4DR16 ARL1\_HUMAN ADP-ribosylation factor-like protein 1 OS=Homo sapiens GN=ARL1 PE=1 SV=1;>tr|B4DWW1|B4DWW1\_HUMAN cDNA F 7.89E-20  
P40763;P40763-2;A8K7B8 STAT3\_HUMAN Signal transducer and activator of transcription 3 OS=Homo sapiens GN=STAT3 PE=1 SV=2;>sp|P40763-2|STAT3\_HUI 0  
P40926;Q6FHZ0;Q75MT9;MDHM\_HUMAN Malate dehydrogenase, mitochondrial OS=Homo sapiens GN=MDH2 PE=1 SV=3;>tr|Q6FHZ0|Q6FHZ0\_HUMAN Malate 1.72E-246  
P40938;B4DKE6;C9JU95;RFC3\_HUMAN Replication factor C subunit 3 OS=Homo sapiens GN=RFC3 PE=1 SV=2;>tr|B4DKE6|B4DKE6\_HUMAN cDNA FLJ60629, | 5.17E-34  
P40939;B4DRH6;B4DDZ5;ECHA\_HUMAN Trifunctional enzyme subunit alpha, mitochondrial OS=Homo sapiens GN=HADHA PE=1 SV=2;>tr|B4DRH6|B4DRH6\_HU 0  
P41091;Q2VIR3;Q2VIR3-2 EIF2G\_HUMAN Eukaryotic translation initiation factor 2 subunit 3 OS=Homo sapiens GN=EIF2S3 PE=1 SV=3;>sp|Q2VIR3|IF2GL\_HUMA 0  
P41214;P41214-2 EIF2D\_HUMAN Eukaryotic translation initiation factor 2D OS=Homo sapiens GN=EIF2D PE=1 SV=3;>sp|P41214-2|EIF2D\_HUMAN Isof 7.25E-14  
P41227;A6NM98;A8MWP7 NAA10\_HUMAN N-alpha-acetyltransferase 10, NatA catalytic subunit OS=Homo sapiens GN=NAA10 PE=1 SV=1;>tr|A6NM98|A6NM98. 5.99E-47  
P41227;Q9BSU3 NAA10\_HUMAN N-alpha-acetyltransferase 10, NatA catalytic subunit OS=Homo sapiens GN=NAA10 PE=1 SV=1;>sp|Q9BSU3|NAA11\_ 2.14E-10  
P41567;Q6IAV3 EIF1\_HUMAN Eukaryotic translation initiation factor 1 OS=Homo sapiens GN=EIF1 PE=1 SV=1;>tr|Q6IAV3|Q6IAV3\_HUMAN Eukaryoti 1.32E-83  
P42226;P42226-2 STAT6\_HUMAN Signal transducer and activator of transcription 6 OS=Homo sapiens GN=STAT6 PE=1 SV=1;>sp|P42226-2|STAT6\_HUI 9.47E-14  
P42229;P51692 STA5A\_HUMAN Signal transducer and activator of transcription 5A OS=Homo sapiens GN=STAT5A PE=1 SV=1;>sp|P51692|STA5B\_HL 2.90E-10  
P42229;Q8WWS9;Q59GY7 STA5A\_HUMAN Signal transducer and activator of transcription 5A OS=Homo sapiens GN=STAT5A PE=1 SV=1;>tr|Q8WWS9|Q8WWS9 2.57E-32  
P42677;Q5T4L6;Q5T4L4;RS27\_HUMAN 40S ribosomal protein S27 OS=Homo sapiens GN=RPS27 PE=1 SV=3;>tr|Q5T4L6|Q5T4L6\_HUMAN Ribosomal prot 2.26E-32  
P42677;Q71UM5 RS27\_HUMAN 40S ribosomal protein S27 OS=Homo sapiens GN=RPS27 PE=1 SV=3;>sp|Q71UM5|RS27L\_HUMAN 40S ribosomal prot 4.78E-50  
P42704;B4DSR0 LPPRC\_HUMAN Leucine-rich PPR motif-containing protein, mitochondrial OS=Homo sapiens GN=LPPRC PE=1 SV=3;>tr|B4DSR0|B4D 0  
P42766;A4D2M5 RL35\_HUMAN 60S ribosomal protein L35 OS=Homo sapiens GN=RPL35 PE=1 SV=2;>tr|A4D2M5|A4D2M5\_HUMAN Similar to 60S ribo 4.24E-68  
P42771;P42771-3;P42771 CD2A1\_HUMAN Cyclin-dependent kinase inhibitor 2A, isoforms 1/2/3 OS=Homo sapiens GN=CDKN2A PE=1 SV=2;>sp|P42771-3|CD2 5.46E-14  
P42892;P42892-4;P42892 ECE1\_HUMAN Endothelin-converting enzyme 1 OS=Homo sapiens GN=ECE1 PE=1 SV=2;>sp|P42892-4|ECE1\_HUMAN Isoform D of E 8.42E-76  
P43155;P43155-2;P43155 CACP\_HUMAN Carnitine O-acetyltransferase OS=Homo sapiens GN=CRAT PE=1 SV=5;>sp|P43155-2|CACP\_HUMAN Isoform 2 of Carn 7.57E-42  
P43246;Q53FK0;Q53GS1;MSH2\_HUMAN DNA mismatch repair protein Msh2 OS=Homo sapiens GN=MSH2 PE=1 SV=1;>tr|Q53FK0|Q53FK0\_HUMAN MutS homc 1.16E-96  
P43304;Q53T76;A8K1Z2;IGPDM\_HUMAN Glycerol-3-phosphate dehydrogenase, mitochondrial OS=Homo sapiens GN=GPD2 PE=1 SV=3;>tr|Q53T76|Q53T76\_H 6.08E-110  
P43487;C9JXG8;Q53EY3;RANG\_HUMAN Ran-specific GTPase-activating protein OS=Homo sapiens GN=RANBP1 PE=1 SV=1;>tr|C9JXG8|C9JXG8\_HUMAN Uncha 4.25E-64  
P43490;Q5SYT8 NAMPT\_HUMAN Nicotinamide phosphoribosyltransferase OS=Homo sapiens GN=NAMPT PE=1 SV=1;>tr|Q5SYT8|Q5SYT8\_HUMAN Nov 0  
P43897-2;P43897;B4DHY2|EFTS\_HUMAN Isoform 2 of Elongation factor Ts, mitochondrial OS=Homo sapiens GN=TSFM;>sp|P43897|EFTS\_HUMAN Elongation f 2.98E-41  
P45954;Q5SQN6;B4DQ51 ACDSB\_HUMAN Short/branched chain specific acyl-CoA dehydrogenase, mitochondrial OS=Homo sapiens GN=ACADSB PE=1 SV=1;>t 6.85E-221  
P45973;Q6I9T7 CBX5\_HUMAN Chromobox protein homolog 5 OS=Homo sapiens GN=CBX5 PE=1 SV=1;>tr|Q6I9T7|Q6I9T7\_HUMAN CBX5 protein OS: 3.45E-25  
P45985-2;P45985 2|MP2K4\_HUMAN Isoform 2 of Dual specificity mitogen-activated protein kinase 4 OS=Homo sapiens GN=MAP2K4;>sp|P45985 1.72E-08  
P46060;B4DY16;B4E0U0 RAGP1\_HUMAN Ran GTPase-activating protein 1 OS=Homo sapiens GN=RANGAP1 PE=1 SV=1;>tr|B4DY16|B4DY16\_HUMAN cDNA FL 0  
P46459;B7Z5J7;B4DSK5;NSF\_HUMAN Vesicle-fusing ATPase OS=Homo sapiens GN=NSF PE=1 SV=3;>tr|B7Z5J7|B7Z5J7\_HUMAN cDNA FLJ58682, highly simil 1.66E-111  
P46734-3;P46734;P46734 3|MP2K3\_HUMAN Isoform 3 of Dual specificity mitogen-activated protein kinase 3 OS=Homo sapiens GN=MAP2K3;>sp|P46734 2.24E-14  
P46776;Q6NZ52;Q9BQQ5 RL27A\_HUMAN 60S ribosomal protein L27a OS=Homo sapiens GN=RPL27A PE=1 SV=2;>tr|Q6NZ52|Q6NZ52\_HUMAN Ribosomal prot 5.42E-74  
P46779;B4DEP9;Q59F34;RL28\_HUMAN 60S ribosomal protein L28 OS=Homo sapiens GN=RPL28 PE=1 SV=3;>tr|B4DEP9|B4DEP9\_HUMAN cDNA FLJ57954, hig 3.18E-53  
P46782;Q53G25 RS5\_HUMAN 40S ribosomal protein S5 OS=Homo sapiens GN=RPS5 PE=1 SV=4;>tr|Q53G25|Q53G25\_HUMAN Ribosomal protein S5 3.19E-138  
P46783;Q9NQ39 RS10\_HUMAN 40S ribosomal protein S10 OS=Homo sapiens GN=RPS10 PE=1 SV=1;>sp|Q9NQ39|RS10L\_HUMAN Putative 40S riboso 7.15E-97  
P46821;A2BDK6;Q5H9P1 MAP1B\_HUMAN Microtubule-associated protein 1B OS=Homo sapiens GN=MAP1B PE=1 SV=2;>tr|A2BDK6|A2BDK6\_HUMAN Microtubu 0  
P46937;P46937-2;P46937 YAP1\_HUMAN Yorkie homolog OS=Homo sapiens GN=YAP1 PE=1 SV=2;>sp|P46937-2|YAP1\_HUMAN Isoform 2 of Yorkie homolog OS: 2.45E-15  
P46977;B4DJ24 STT3A\_HUMAN Dolichyl-diphosphooligosaccharide--protein glycosyltransferase subunit STT3A OS=Homo sapiens GN=STT3A PE=1 SV: 6.87E-13  
P47813;O14602 IF1AX\_HUMAN Eukaryotic translation initiation factor 1A, X-chromosomal OS=Homo sapiens GN=EIF1AX PE=1 SV=2;>sp|O14602|IF1 9.86E-83  
P47813;O14602;A6NJH9 IF1AX\_HUMAN Eukaryotic translation initiation factor 1A, X-chromosomal OS=Homo sapiens GN=EIF1AX PE=1 SV=2;>sp|O14602|IF1 3.92E-139  
P47897;Q53HS0;A8K3A8;SYQ\_HUMAN Glutaminyl-tRNA synthetase OS=Homo sapiens GN=QARS PE=1 SV=1;>tr|Q53HS0|Q53HS0\_HUMAN Glutaminyl-tRNA s 0  
P47985;P0C7P4 UCRI\_HUMAN Cytochrome b-c1 complex subunit Rieske, mitochondrial OS=Homo sapiens GN=UQCRFS1 PE=1 SV=2;>sp|P0C7P4|UCF 3.67E-52  
P48047;Q53HH2 ATPO\_HUMAN ATP synthase subunit O, mitochondrial OS=Homo sapiens GN=ATP5O PE=1 SV=1;>tr|Q53HH2|Q53HH2\_HUMAN Mitoch 3.66E-114  
P48059;Q7Z4I7-2;Q7Z4I7 LIMS1\_HUMAN LIM and senescent cell antigen-like-containing domain protein 1 OS=Homo sapiens GN=LIMS1 PE=1 SV=4;>sp|Q7Z4I 3.04E-29  
P48556;Q5U0B3;B4E2Y4 PSMD8\_HUMAN 26S proteasome non-ATPase regulatory subunit 8 OS=Homo sapiens GN=PSMD8 PE=1 SV=2;>tr|Q5U0B3|Q5U0B3\_H 1.59E-29  
P48643;Q9BU08;B7ZAR1;TCPE\_HUMAN T-complex protein 1 subunit epsilon OS=Homo sapiens GN=CTCT5 PE=1 SV=1;>tr|Q9BU08|Q9BU08\_HUMAN Putative ur 0  
P48729-2;P48729;Q8N752|KC1A\_HUMAN Isoform 2 of Casein kinase I isoform alpha OS=Homo sapiens GN=CSNK1A1;>sp|P48729|KC1A\_HUMAN Casein kinas 1.05E-10  
P48735;Q53GL5;B4DFL2;IDHP\_HUMAN Isocitrate dehydrogenase [NADP], mitochondrial OS=Homo sapiens GN=IDH2 PE=1 SV=2;>tr|Q53GL5|Q53GL5\_HUMAN 0  
P48960;P48960-3;P48960 CD97\_HUMAN CD97 antigen OS=Homo sapiens GN=CD97 PE=1 SV=4;>sp|P48960-3|CD97\_HUMAN Isoform 3 of CD97 antigen OS=H 1.59E-07  
P49023-3;P49023;P49023 3|PAXI\_HUMAN Isoform Gamma of Paxillin OS=Homo sapiens GN=PXN;>sp|P49023|PAXI\_HUMAN Paxillin OS=Homo sapiens GN=PXN 8.26E-45  
P49137;P49137-2;Q16644 MAPK2\_HUMAN MAP kinase-activated protein kinase 2 OS=Homo sapiens GN=MAPKAPK2 PE=1 SV=1;>sp|P49137-2|MAPK2\_HUMAN 3.38E-39  
P49137;Q16644;P49137-2 MAPK2\_HUMAN MAP kinase-activated protein kinase 2 OS=Homo sapiens GN=MAPKAPK2 PE=1 SV=1;>sp|Q16644|MAPK3\_HUMAN M, 4.07E-09  
P49321-3;P49321 3|NASP\_HUMAN Isoform 3 of Nuclear autoantigenic sperm protein OS=Homo sapiens GN=NASP;>sp|P49321|NASP\_HUMAN Nuclear a 1.69E-255

P49321-3;P49321;P49321 3|NASP\_HUMAN Isoform 3 of Nuclear autoantigenic sperm protein OS=Homo sapiens GN=NASP;>sp|P49321|NASP\_HUMAN Nuclear a 0  
P49366;P49366-2;Q5J8M5|DHYS\_HUMAN Deoxyhypusine synthase OS=Homo sapiens GN=DHPS PE=1 SV=1;>sp|P49366-2|DHYS\_HUMAN Isoform Short of Deo 1.24E-159  
P49406;A8K5D5;B4DIG4 RM19\_HUMAN 39S ribosomal protein L19, mitochondrial OS=Homo sapiens GN=MRPL19 PE=1 SV=2;>tr|A8K5D5|A8K5D5\_HUMAN cC 5.78E-34  
P49419;P49419-2;B4DMA AL7A1\_HUMAN Alpha-aminoadipic semialdehyde dehydrogenase OS=Homo sapiens GN=ALDH7A1 PE=1 SV=5;>sp|P49419-2|AL7A1\_H 5.67E-203  
P49419;P49419-2;P49419 AL7A1\_HUMAN Alpha-aminoadipic semialdehyde dehydrogenase OS=Homo sapiens GN=ALDH7A1 PE=1 SV=5;>sp|P49419-2|AL7A1\_H 1.15E-254  
P49585;Q9Y5K3;Q9Y5K3- PCY1A\_HUMAN Choline-phosphate cytidyltransferase A OS=Homo sapiens GN=PCYT1A PE=1 SV=2;>sp|Q9Y5K3|PCY1B\_HUMAN ChC 4.27E-26  
P49588;B4DR45 SYAC\_HUMAN Alanyl-tRNA synthetase, cytoplasmic OS=Homo sapiens GN=AARS PE=1 SV=2;>tr|B4DR45|B4DR45\_HUMAN cDNA FLJ 3.68E-161  
P49593;Q6IPC0;A0M8Q2; PPM1F\_HUMAN Protein phosphatase 1F OS=Homo sapiens GN=PPM1F PE=1 SV=3;>tr|Q6IPC0|Q6IPC0\_HUMAN Protein phosphatase 1 1.38E-08  
P49747;B4DN90;B4DKJ3; COMP\_HUMAN Cartilage oligomeric matrix protein OS=Homo sapiens GN=COMP PE=1 SV=2;>tr|B4DN90|B4DN90\_HUMAN cDNA FLJ5 8.20E-196  
P49753;Q86TX2;P49753- ACOT2\_HUMAN Acyl-coenzyme A thioesterase 2, mitochondrial OS=Homo sapiens GN=ACOT2 PE=1 SV=6;>sp|Q86TX2|ACOT1\_HUMA 1.01E-33  
P49757;P49757-3;P49757 NUMB\_HUMAN Protein numb homolog OS=Homo sapiens GN=NUMB PE=1 SV=2;>sp|P49757-3|NUMB\_HUMAN Isoform 3 of Protein n 1.41E-06  
P49770;Q53XC2;Q9BPX4 EI2BB\_HUMAN Translation initiation factor eIF-2B subunit beta OS=Homo sapiens GN=EIF2B2 PE=1 SV=3;>tr|Q53XC2|Q53XC2\_HUM 9.67E-95  
P49773;A4D2H4;D6RD60; HINT1\_HUMAN Histidine triad nucleotide-binding protein 1 OS=Homo sapiens GN=HINT1 PE=1 SV=2;>tr|A4D2H4|A4D2H4\_HUMAN S 5.78E-28  
P49792;A6NKT7;Q7Z3J3; RBP2\_HUMAN E3 SUMO-protein ligase RanBP2 OS=Homo sapiens GN=RANBP2 PE=1 SV=2;>sp|A6NKT7|RGPD3\_HUMAN RanBP2-like 9.37E-58  
P49821;P49821-2;Q53G7 NDUV1\_HUMAN NADH dehydrogenase [ubiquinone] flavoprotein 1, mitochondrial OS=Homo sapiens GN=NDUFV1 PE=1 SV=4;>sp|P4 1.95E-68  
P49961-3 ENTPT1\_HUMAN Isoform Placental II of Ectonucleoside triphosphate diphosphohydrolase 1 OS=Homo sapiens GN=ENTPD1  
P50135;B4DWC1 HNMT\_HUMAN Histamine N-methyltransferase OS=Homo sapiens GN=HNMT PE=1 SV=1;>tr|B4DWC1|B4DWC1\_HUMAN cDNA FLJ513 5.89E-48  
P50224;P50225-2;P50224 ST1A3\_HUMAN Sulfotransferase 1A3/1A4 OS=Homo sapiens GN=SULT1A3 PE=1 SV=1;>sp|P50225-2|ST1A1\_HUMAN Isoform 2 of Su 1.01E-18  
P50402;Q6FI02;Q5HY57 EMD\_HUMAN Emerin OS=Homo sapiens GN=EMD PE=1 SV=1;>tr|Q6FI02|Q6FI02\_HUMAN EMD protein OS=Homo sapiens GN=EMD f 6.18E-38  
P50453;Q6N0A8 SPB9\_HUMAN Serpin B9 OS=Homo sapiens GN=SERPINB9 PE=1 SV=1;>tr|Q6N0A8|Q6N0A8\_HUMAN Putative uncharacterized proteir 3.58E-92  
P50454;A8K259;B4DN87 SERPH\_HUMAN Serpin H1 OS=Homo sapiens GN=SERPINH1 PE=1 SV=2;>tr|A8K259|A8K259\_HUMAN cDNA FLJ78501, highly similar 0  
P50479;P50479-2 PDLI4\_HUMAN PDZ and LIM domain protein 4 OS=Homo sapiens GN=PDLIM4 PE=1 SV=2;>sp|P50479-2|PDLI4\_HUMAN Isoform 2 of 1.72E-16  
P50502;Q2TU77;B4E0U6; F10A1\_HUMAN Hsc70-interacting protein OS=Homo sapiens GN=ST13 PE=1 SV=2;>tr|Q2TU77|Q2TU77\_HUMAN Aging-associated pro 1.10E-198  
P50502;Q8NFI4;Q8IZP2 F10A1\_HUMAN Hsc70-interacting protein OS=Homo sapiens GN=ST13 PE=1 SV=2;>sp|Q8NFI4|F10A5\_HUMAN Putative protein FAM1 0  
P50579;B4DUX5;Q8NB11; AMPM2\_HUMAN Methionine aminopeptidase 2 OS=Homo sapiens GN=METAP2 PE=1 SV=1;>tr|B4DUX5|B4DUX5\_HUMAN Methionine a 1.27E-27  
P50897;Q6FGQ4;Q5T0S6; PPT1\_HUMAN Palmitoyl-protein thioesterase 1 OS=Homo sapiens GN=PPT1 PE=1 SV=1;>tr|Q6FGQ4|Q6FGQ4\_HUMAN PPT1 protein (f 1.61E-20  
P50990;Q53HU0;B4DEM7; TCPD\_HUMAN T-complex protein 1 subunit theta OS=Homo sapiens GN=CCT8 PE=1 SV=4;>tr|Q53HU0|Q53HU0\_HUMAN Chaperonin 0  
P50991;A8K3C3;B7Z8B1; TCPD\_HUMAN T-complex protein 1 subunit delta OS=Homo sapiens GN=CCT4 PE=1 SV=4;>tr|A8K3C3|A8K3C3\_HUMAN T-complex pr 0  
P51003;P51003-2;Q9NRJ5 PAPOA\_HUMAN Poly(A) polymerase alpha OS=Homo sapiens GN=PAPOLA PE=1 SV=4;>sp|P51003-2|PAPOA\_HUMAN Isoform 2 of Pol 1.75E-33  
P51114;P51114-2;P51114 FXR1\_HUMAN Fragile X mental retardation syndrome-related protein 1 OS=Homo sapiens GN=FXR1 PE=1 SV=3;>sp|P51114-2|FXR1\_ 1.38E-93  
P51149;B4DPH9;C9J8S3; RAB7A\_HUMAN Ras-related protein Rab-7a OS=Homo sapiens GN=RAB7A PE=1 SV=1;>tr|B4DPH9|B4DPH9\_HUMAN cDNA FLJ55895, 2.76E-112  
P51151;Q9NP90 RAB9A\_HUMAN Ras-related protein Rab-9A OS=Homo sapiens GN=RAB9A PE=1 SV=1;>sp|Q9NP90|RAB9B\_HUMAN Ras-related prote 1.39E-29  
P51153;Q96E17 RAB13\_HUMAN Ras-related protein Rab-13 OS=Homo sapiens GN=RAB13 PE=1 SV=1;>sp|Q96E17|RAB3C\_HUMAN Ras-related prote 2.57E-19  
P51398;B4DY62;B4DP59 RT29\_HUMAN 28S ribosomal protein S29, mitochondrial OS=Homo sapiens GN=DAP3 PE=1 SV=1;>tr|B4DY62|B4DY62\_HUMAN cDNA 2.63E-49  
P51553;D3DWW9;O15384 IDH3G\_HUMAN Isocitrate dehydrogenase [NAD] subunit gamma, mitochondrial OS=Homo sapiens GN=IDH3G PE=1 SV=1;>tr|D3DWW 4.22E-20  
P51580;Q9BS45;Q6I929 TPMT\_HUMAN Thiopurine S-methyltransferase OS=Homo sapiens GN=TPMT PE=1 SV=1;>tr|Q9BS45|Q9BS45\_HUMAN Thiopurine S-m 1.39E-08  
P51606;P51606-2 RENBP\_HUMAN N-acylglucosamine 2-epimerase OS=Homo sapiens GN=RENBPE PE=1 SV=2;>sp|P51606-2|RENBPE\_HUMAN Isoform 2 of 2.82E-10  
P51608-2;P51608 2|MECP2\_HUMAN Isoform B of Methyl-CpG-binding protein 2 OS=Homo sapiens GN=MECP2;>sp|P51608|MECP2\_HUMAN Methyl-CpG- 1.63E-05  
P51812;B7ZB17;B4DG22; KS6A3\_HUMAN Ribosomal protein S6 kinase alpha-3 OS=Homo sapiens GN=RPS6KA3 PE=1 SV=1;>tr|B7ZB17|B7ZB17\_HUMAN cDNA 5.28E-35  
P51812;Q15349-2;Q1541 KS6A3\_HUMAN Ribosomal protein S6 kinase alpha-3 OS=Homo sapiens GN=RPS6KA3 PE=1 SV=1;>sp|Q15349-2|KS6A2\_HUMAN Isof 1.03E-10  
P51884;Q53FV4 LUM\_HUMAN Lumican OS=Homo sapiens GN=LUM PE=1 SV=2;>tr|Q53FV4|Q53FV4\_HUMAN Lumican variant (Fragment) OS=Homo s 0  
P51888;Q6FG38;Q6FHG6; PRELP\_HUMAN Prolargin OS=Homo sapiens GN=PRELP PE=1 SV=1;>tr|Q6FG38|Q6FG38\_HUMAN PRELP protein OS=Homo sapiens GI 0  
P51911;Q53FP8;B4DUX6; CNN1\_HUMAN Calponin-1 OS=Homo sapiens GN=CNN1 PE=1 SV=2;>tr|Q53FP8|Q53FP8\_HUMAN Calponin 1, basic, smooth muscle vi 1.90E-125  
P51965;Q969T4 UB2E1\_HUMAN Ubiquitin-conjugating enzyme E2 E1 OS=Homo sapiens GN=UBE2E1 PE=1 SV=1;>sp|Q969T4|UB2E3\_HUMAN Ubiquiti 1.71E-10  
P51965;Q96LR5 UB2E1\_HUMAN Ubiquitin-conjugating enzyme E2 E1 OS=Homo sapiens GN=UBE2E1 PE=1 SV=1;>sp|Q96LR5|UB2E2\_HUMAN Ubiquiti 1.78E-31  
P52272;P52272-2;Q59ES HNRPM\_HUMAN Heterogeneous nuclear ribonucleoprotein M OS=Homo sapiens GN=HNRNPM PE=1 SV=3;>sp|P52272-2|HNRPM\_HUM 1.61E-260  
P52298;P52298-2;Q7Z3W NCBP2\_HUMAN Nuclear cap-binding protein subunit 2 OS=Homo sapiens GN=NCBP2 PE=1 SV=1;>sp|P52298-2|NCBP2\_HUMAN Isofo 4.57E-12  
P52435;Q9GZM3-2;Q9GZM3 RPB11\_HUMAN DNA-directed RNA polymerase II subunit RPB11-a OS=Homo sapiens GN=POLR2J PE=1 SV=1;>sp|Q9GZM3-2|RPB1B\_ 8.64E-06  
P52435;Q9GZM3;Q9GZM3 RPB11\_HUMAN DNA-directed RNA polymerase II subunit RPB11-a OS=Homo sapiens GN=POLR2J PE=1 SV=1;>sp|Q9GZM3|RPB1B\_H 2.86E-09  
P52565;A8MXW0;B4DUV9 GDIR1\_HUMAN Rho GDP-dissociation inhibitor 1 OS=Homo sapiens GN=ARHGDI1 PE=1 SV=3;>tr|A8MXW0|A8MXW0\_HUMAN Unchar 6.45E-59  
P52597;B4DKS8 HNRPF\_HUMAN Heterogeneous nuclear ribonucleoprotein F OS=Homo sapiens GN=HNRNPF PE=1 SV=3;>tr|B4DKS8|B4DKS8\_HUMAN 1.93E-281  
P52630;P52630-2 STAT2\_HUMAN Signal transducer and activator of transcription 2 OS=Homo sapiens GN=STAT2 PE=1 SV=1;>sp|P52630-2|STAT2\_HUI 3.61E-22  
P52701;P52701-2 MSH6\_HUMAN DNA mismatch repair protein Msh6 OS=Homo sapiens GN=MSH6 PE=1 SV=2;>sp|P52701-2|MSH6\_HUMAN Isoform G 7.90E-190  
P52732;B2RAM6 KIF11\_HUMAN Kinesin-like protein KIF11 OS=Homo sapiens GN=KIF11 PE=1 SV=2;>tr|B2RAM6|B2RAM6\_HUMAN cDNA, FLJ95005, h 2.12E-59  
P52758;Q6IBG0 UK114\_HUMAN Ribonuclease UK114 OS=Homo sapiens GN=HRSP12 PE=1 SV=1;>tr|Q6IBG0|Q6IBG0\_HUMAN Heat-responsive protei 1.48E-137  
P52788;P52788-2 SPSY\_HUMAN Spermine synthase OS=Homo sapiens GN=SMS PE=1 SV=2;>sp|P52788-2|SPSY\_HUMAN Isoform 2 of Spermine synth. 5.11E-81  
P52788;P52788-2;B4DE4 SPSY\_HUMAN Spermine synthase OS=Homo sapiens GN=SMS PE=1 SV=2;>sp|P52788-2|SPSY\_HUMAN Isoform 2 of Spermine synth. 7.47E-184  
P52888;Q96CV8;Q9BW75 THOP1\_HUMAN Thimet oligopeptidase OS=Homo sapiens GN=THOP1 PE=1 SV=2;>tr|Q96CV8|Q96CV8\_HUMAN Thimet oligopeptidase 1.91E-127  
P52895;B4DK69;Q59GU2; AK1C2\_HUMAN Aldo-keto reductase family 1 member C2 OS=Homo sapiens GN=AKR1C2 PE=1 SV=3;>tr|B4DK69|B4DK69\_HUMAN c 1.27E-19  
P52907;A8K0T9 CAZA1\_HUMAN F-actin-capping protein subunit alpha-1 OS=Homo sapiens GN=CAPZA1 PE=1 SV=3;>tr|A8K0T9|A8K0T9\_HUMAN cDN 2.76E-188  
P52943;Q53FN1;B7Z6C0 CRIP2\_HUMAN Cysteine-rich protein 2 OS=Homo sapiens GN=CRIP2 PE=1 SV=1;>tr|Q53FN1|Q53FN1\_HUMAN Cysteine-rich protein 2 2.36E-83



P53367-2;Q2M2X4;B4E27 2|ARFP1\_HUMAN Isoform A of Arfaptin-1 OS=Homo sapiens GN=ARFIP1;>tr|Q2M2X4|Q2M2X4\_HUMAN ADP-ribosylation factor intera 5.27E-56  
P53582;D6RBD2;D6RF24 AMPM1\_HUMAN Methionine aminopeptidase 1 OS=Homo sapiens GN=METAP1 PE=1 SV=2;>tr|D6RBD2|D6RBD2\_HUMAN Uncharacter 3.00E-27  
P53597;A8K4W7;Q6IAL5;SUCA\_HUMAN Succinyl-CoA ligase [GDP-forming] subunit alpha, mitochondrial OS=Homo sapiens GN=SUCLG1 PE=1 SV=4;>tr|A8K4W 7.11E-64  
P53602;Q59G80 MVD1\_HUMAN Diphosphomevalonate decarboxylase OS=Homo sapiens GN=MVD PE=1 SV=1;>tr|Q59G80|Q59G80\_HUMAN Diphosph 3.32E-06  
P53611;Q6IB63;Q59GT6;PGTB2\_HUMAN Geranylgeranyl transferase type-2 subunit beta OS=Homo sapiens GN=RABGGTB PE=1 SV=2;>tr|Q6IB63|Q6IB63\_HL 9.10E-20  
P53634;P53634-2 CATC\_HUMAN Dipeptidyl peptidase 1 OS=Homo sapiens GN=CTSC PE=1 SV=2;>sp|P53634-2|CATC\_HUMAN Isoform 2 of Dipeptidyl p 6.22E-20  
P53701;Q68D50 CCHL\_HUMAN Cytochrome c-type heme lyase OS=Homo sapiens GN=HCCS PE=1 SV=1;>tr|Q68D50|Q68D50\_HUMAN Putative uncha 2.12E-28  
P53990-4;P53990;P53990 4|IST1\_HUMAN Isoform 4 of IST1 homolog OS=Homo sapiens GN=KIAA0174;>sp|P53990|IST1\_HUMAN IST1 homolog OS=Homo sap 4.60E-10  
P53992;B4DSN3 SC24C\_HUMAN Protein transport protein Sec24C OS=Homo sapiens GN=SEC24C PE=1 SV=3;>tr|B4DSN3|B4DSN3\_HUMAN cDNA FLJ 3.32E-50  
P54136;P54136-2;B4DXW SYRC\_HUMAN Arginyl-tRNA synthetase, cytoplasmic OS=Homo sapiens GN=RARS PE=1 SV=2;>sp|P54136-2|SYRC\_HUMAN Isoform I 0  
P54652;B3KUS2 HSP72\_HUMAN Heat shock-related 70 kDa protein 2 OS=Homo sapiens GN=HSPA2 PE=1 SV=1;>tr|B3KUS2|B3KUS2\_HUMAN cDNA F 0  
P54687;Q68DQ7;B7Z2M5;BCAT1\_HUMAN Branched-chain-amino-acid aminotransferase, cytosolic OS=Homo sapiens GN=BCAT1 PE=1 SV=3;>tr|Q68DQ7|Q68D 1.05E-27  
P54709;D3DNF9 AT1B3\_HUMAN Sodium/potassium-transporting ATPase subunit beta-3 OS=Homo sapiens GN=ATP1B3 PE=1 SV=1;>tr|D3DNF9|D3DN 2.93E-37  
P54727;Q53F10;B4DEA3;IRD23B\_HUMAN UV excision repair protein RAD23 homolog B OS=Homo sapiens GN=RAD23B PE=1 SV=1;>tr|Q53F10|Q53F10\_HUMA 7.60E-60  
P54868;Q6IBF4;B7Z8R3;EHMCS2\_HUMAN Hydroxymethylglutaryl-CoA synthase, mitochondrial OS=Homo sapiens GN=HMGS2 PE=1 SV=1;>tr|Q6IBF4|Q6IBF4 1.10E-29  
P55010;Q6IBU0;Q05DF3;IF5\_HUMAN Eukaryotic translation initiation factor 5 OS=Homo sapiens GN=EIF5 PE=1 SV=2;>tr|Q6IBU0|Q6IBU0\_HUMAN EIF5 prote 1.45E-129  
P55011;Q53ZR1;B7ZM24;S12A2\_HUMAN Solute carrier family 12 member 2 OS=Homo sapiens GN=SLC12A2 PE=1 SV=1;>tr|Q53ZR1|Q53ZR1\_HUMAN Bumet: 1.50E-06  
P55036;Q5VWC4;D3DV16 PSMD4\_HUMAN 26S proteasome non-ATPase regulatory subunit 4 OS=Homo sapiens GN=PSMD4 PE=1 SV=1;>tr|Q5VWC4|Q5VWC4\_ 0  
P55039;Q53Y50;A8MZF9 DRG2\_HUMAN Developmentally-regulated GTP-binding protein 2 OS=Homo sapiens GN=DRG2 PE=1 SV=1;>tr|Q53Y50|Q53Y50\_HUM 1.71E-40  
P55072;Q96IF9;Q0IIN5;Q TERA\_HUMAN Transitional endoplasmic reticulum ATPase OS=Homo sapiens GN=VCP PE=1 SV=4;>tr|Q96IF9|Q96IF9\_HUMAN VCP pr 0  
P55084;B4E2W0;B4DY96;ECHB\_HUMAN Trifunctional enzyme subunit beta, mitochondrial OS=Homo sapiens GN=HADHB PE=1 SV=3;>tr|B4E2W0|B4E2W0\_HU 1.28E-141  
P55196-5;P55196;P55196 5|AFAD\_HUMAN Isoform 5 of Afadin OS=Homo sapiens GN=MLLT4;>sp|P55196|AFAD\_HUMAN Afadin OS=Homo sapiens GN=MLLT4 P 5.78E-78  
P55209;B3KNT8;B7Z2V4;NP1L1\_HUMAN Nucleosome assembly protein 1-like 1 OS=Homo sapiens GN=NAP1L1 PE=1 SV=1;>tr|B3KNT8|B3KNT8\_HUMAN cDNA 0  
P55212;D6RHU3;P55212-1 CASP6\_HUMAN Caspase-6 OS=Homo sapiens GN=CASP6 PE=1 SV=2;>tr|D6RHU3|D6RHU3\_HUMAN Uncharacterized protein OS=Hon 2.34E-17  
P55212;P55212-2 CASP6\_HUMAN Caspase-6 OS=Homo sapiens GN=CASP6 PE=1 SV=2;>sp|P55212-2|CASP6\_HUMAN Isoform Beta of Caspase-6 OS=H 2.07E-26  
P55263;P55263-2;Q5JQ1C ADK\_HUMAN Adenosine kinase OS=Homo sapiens GN=ADK PE=1 SV=2;>sp|P55263-2|ADK\_HUMAN Isoform Short of Adenosine kina: 5.91E-137  
P55265-4;P55265;P55265 4|DSRAD\_HUMAN Isoform 4 of Double-stranded RNA-specific adenosine deaminase OS=Homo sapiens GN=ADAR;>sp|P55265|DSRAD 0  
P55327-3;P55327;P55327 3|TPD52\_HUMAN Isoform 3 of Tumor protein D52 OS=Homo sapiens GN=TPD52;>sp|P55327|TPD52\_HUMAN Tumor protein D52 OS= 1.13E-207  
P55786;B7Z899;B7Z463;FSA\_HUMAN Puromycin-sensitive aminopeptidase OS=Homo sapiens GN=NPEPPS PE=1 SV=2;>tr|B7Z899|B7Z899\_HUMAN cDNA FLJ 5.23E-135  
P55795;B4DFK9;B4DP00 HNRH2\_HUMAN Heterogeneous nuclear ribonucleoprotein H2 OS=Homo sapiens GN=HNRNPH2 PE=1 SV=1;>tr|B4DFK9|B4DFK9\_HUM 6.95E-157  
P55809;B2R5V2;Q6IAV5 SCOT1\_HUMAN Succinyl-CoA:3-ketoacid-coenzyme A transferase 1, mitochondrial OS=Homo sapiens GN=OXCT1 PE=1 SV=1;>tr|B2R 4.74E-33  
P55854;Q6EEV6 SUMO3\_HUMAN Small ubiquitin-related modifier 3 OS=Homo sapiens GN=SUMO3 PE=1 SV=2;>sp|Q6EEV6|SUMO4\_HUMAN Small ub 1.38E-33  
P55884-2;P55884;A4D21C 2|EIF3B\_HUMAN Isoform 2 of Eukaryotic translation initiation factor 3 subunit B OS=Homo sapiens GN=EIF3B;>sp|P55884|EIF3B\_HU 3.13E-113  
P56199;B4DTY8 ITA1\_HUMAN Integrin alpha-1 OS=Homo sapiens GN=ITGA1 PE=1 SV=2;>tr|B4DTY8|B4DTY8\_HUMAN cDNA FLJ61587, highly similar 9.93E-07  
P56537;B7ZBG9 IF6\_HUMAN Eukaryotic translation initiation factor 6 OS=Homo sapiens GN=EIF6 PE=1 SV=1;>tr|B7ZBG9|B7ZBG9\_HUMAN Eukaryoti 1.38E-83  
P56545-2;Q5SQP8;Q8IY4 2|CTBP2\_HUMAN Isoform 2 of C-terminal-binding protein 2 OS=Homo sapiens GN=CTBP2;>tr|Q5SQP8|Q5SQP8\_HUMAN C-terminal b 8.15E-28  
P57737;P57737-2 CORO7\_HUMAN Coronin-7 OS=Homo sapiens GN=CORO7 PE=1 SV=2;>sp|P57737-2|CORO7\_HUMAN Isoform 2 of Coronin-7 OS=Hor 1.20E-43  
P57740;B4DZ67;Q6PJE1;ENU107\_HUMAN Nuclear pore complex protein Nup107 OS=Homo sapiens GN=NUP107 PE=1 SV=1;>tr|B4DZ67|B4DZ67\_HUMAN cDN/ 3.45E-32  
P58546;Q69YG1;C9JL85 MTPN\_HUMAN Myotrophin OS=Homo sapiens GN=MTPN PE=1 SV=2;>tr|Q69YG1|Q69YG1\_HUMAN Myotrophin OS=Homo sapiens GN: 3.08E-149  
P59665;P59666;Q6EZE9;DEF1\_HUMAN Neutrophil defensin 1 OS=Homo sapiens GN=DEFA1 PE=1 SV=1;>sp|P59666|DEF3\_HUMAN Neutrophil defensin 3 OS= 5.70E-07  
P60228;Q6IAX5;B2R806;EIF3E\_HUMAN Eukaryotic translation initiation factor 3 subunit E OS=Homo sapiens GN=EIF3E PE=1 SV=1;>tr|Q6IAX5|Q6IAX5\_HUM, 5.79E-166  
P60468;Q53FA5 SC61B\_HUMAN Protein transport protein Sec61 subunit beta OS=Homo sapiens GN=SEC61B PE=1 SV=2;>tr|Q53FA5|Q53FA5\_HUMAN 1.21E-06  
P60510;Q5U086 PP4C\_HUMAN Serine/threonine-protein phosphatase 4 catalytic subunit OS=Homo sapiens GN=PPP4C PE=1 SV=1;>tr|Q5U086|Q5U08 2.24E-06  
P60900;B4DXJ9 PSA6\_HUMAN Proteasome subunit alpha type-6 OS=Homo sapiens GN=PSMA6 PE=1 SV=1;>tr|B4DXJ9|B4DXJ9\_HUMAN Proteasome 4.39E-73  
P60981;B4DYA6;B7Z9M9 DEST\_HUMAN Destrin OS=Homo sapiens GN=DSTN PE=1 SV=3;>tr|B4DYA6|B4DYA6\_HUMAN Destrin (Actin depolymerizing factor), i: 9.96E-69  
P61006;B4DEK7 RAB8A\_HUMAN Ras-related protein Rab-8A OS=Homo sapiens GN=RAB8A PE=1 SV=1;>tr|B4DEK7|B4DEK7\_HUMAN cDNA FLJ53028, 3.96E-121  
P61011;B4DDS7;B4DUW6 SRP54\_HUMAN Signal recognition particle 54 kDa protein OS=Homo sapiens GN=SRP54 PE=1 SV=1;>tr|B4DDS7|B4DDS7\_HUMAN cC 2.64E-178  
P61019;B4DMQ5;D3DS24 RAB2A\_HUMAN Ras-related protein Rab-2A OS=Homo sapiens GN=RAB2A PE=1 SV=1;>tr|B4DMQ5|B4DMQ5\_HUMAN cDNA FLJ51998 3.50E-178  
P61019;Q8WUD1 RAB2A\_HUMAN Ras-related protein Rab-2A OS=Homo sapiens GN=RAB2A PE=1 SV=1;>sp|Q8WUD1|RAB2B\_HUMAN Ras-related prot 0  
P61020;Q6FI54;B4DKD7 RAB5B\_HUMAN Ras-related protein Rab-5B OS=Homo sapiens GN=RAB5B PE=1 SV=1;>tr|Q6FI54|Q6FI54\_HUMAN RAB5B protein OS 1.45E-88  
P61077-3;P61077-2;P610 3|UBE2D3\_HUMAN Isoform 3 of Ubiquitin-conjugating enzyme E2 D3 OS=Homo sapiens GN=UBE2D3;>sp|P61077-2|UBE2D3\_HUMAN Is 2.22E-11  
P61086;P61086-2 UBE2K\_HUMAN Ubiquitin-conjugating enzyme E2 K OS=Homo sapiens GN=UBE2K PE=1 SV=3;>sp|P61086-2|UBE2K\_HUMAN Isoform 2.97E-08  
P61088;Q5JXB2 UBE2N\_HUMAN Ubiquitin-conjugating enzyme E2 N OS=Homo sapiens GN=UBE2N PE=1 SV=1;>sp|Q5JXB2|UE2NL\_HUMAN Putative i 1.66E-147  
P61158;Q53QM2;B4DXW1 ARP3\_HUMAN Actin-related protein 3 OS=Homo sapiens GN=ACTR3 PE=1 SV=3;>tr|Q53QM2|Q53QM2\_HUMAN ARP3 actin-related pr 1.99E-248  
P61163;B4DM97;B4DXP9;ACTZ\_HUMAN Alpha-centractin OS=Homo sapiens GN=ACTR1A PE=1 SV=1;>tr|B4DM97|B4DM97\_HUMAN cDNA FLJ55002, highly sim 8.69E-147  
P61163;P42025 ACTZ\_HUMAN Alpha-centractin OS=Homo sapiens GN=ACTR1A PE=1 SV=1;>sp|P42025|ACTY\_HUMAN Beta-centractin OS=Homo sap 1.02E-188  
P61221;D6R9I9 ABCE1\_HUMAN ATP-binding cassette sub-family E member 1 OS=Homo sapiens GN=ABCE1 PE=1 SV=1;>tr|D6R9I9|D6R9I9\_HUMAN 1.10E-290  
P61224;A6NIZ1 RAP1B\_HUMAN Ras-related protein Rap-1b OS=Homo sapiens GN=RAP1B PE=1 SV=1;>sp|A6NIZ1|RP1BL\_HUMAN Ras-related proteir 1.12E-86  
P61224;B4DQI8;Q9BXV4;RAP1B\_HUMAN Ras-related protein Rap-1b OS=Homo sapiens GN=RAP1B PE=1 SV=1;>tr|B4DQI8|B4DQI8\_HUMAN cDNA FLJ51696, l 1.44E-26  
P61225;Q5JQ44 RAP2B\_HUMAN Ras-related protein Rap-2b OS=Homo sapiens GN=RAP2B PE=1 SV=1;>tr|Q5JQ44|Q5JQ44\_HUMAN Putative uncharac 2.32E-09  
P61289-2;P61289;Q6FHK: 2|PSME3\_HUMAN Isoform 2 of Proteasome activator complex subunit 3 OS=Homo sapiens GN=PSME3;>sp|P61289|PSME3\_HUMAN Pr 2.46E-50



P61313;Q5U0C0;B4DLP4 RL15\_HUMAN 60S ribosomal protein L15 OS=Homo sapiens GN=RPL15 PE=1 SV=2;>tr|Q5U0C0|Q5U0C0\_HUMAN Ribosomal protein L 4.30E-81  
P61457;Q6FGB3;Q6LEE0;PHS\_HUMAN Pterin-4-alpha-carbinolamine dehydratase OS=Homo sapiens GN=PCBD1 PE=1 SV=2;>tr|Q6FGB3|Q6FGB3\_HUMAN PCB 2.60E-200  
P61513;Q6P4E4;C9J4Z3 RL37A\_HUMAN 60S ribosomal protein L37a OS=Homo sapiens GN=RPL37A PE=1 SV=2;>tr|Q6P4E4|Q6P4E4\_HUMAN RPL37A protein 8.93E-81  
P61586;B4DKN9;C9JX21;RHOA\_HUMAN Transforming protein RhoA OS=Homo sapiens GN=RHOA PE=1 SV=1;>tr|B4DKN9|B4DKN9\_HUMAN cDNA FLJ57740, h 1.88E-76  
P61586;P08134 RHOA\_HUMAN Transforming protein RhoA OS=Homo sapiens GN=RHOA PE=1 SV=1;>sp|P08134|RHOC\_HUMAN Rho-related GTP-binc 0  
P61599;A8MZB2;A6NHA3 NAA20\_HUMAN N-alpha-acetyltransferase 20, NatB catalytic subunit OS=Homo sapiens GN=NAA20 PE=1 SV=1;>tr|A8MZB2|A8MZB2. 2.05E-06  
P61604;B8ZZL8;Q9UNM1 CH10\_HUMAN 10 kDa heat shock protein, mitochondrial OS=Homo sapiens GN=HSPE1 PE=1 SV=2;>tr|B8ZZL8|B8ZZL8\_HUMAN Heat 1.71E-30  
P61619;Q9H9S3;Q9H9S3-S61A1\_HUMAN Protein transport protein Sec61 subunit alpha isoform 1 OS=Homo sapiens GN=SEC61A1 PE=1 SV=2;>sp|Q9H9S3|S6 2.48E-12  
P61764-2;P61764;Q68CM 2|STXB1\_HUMAN Isoform 2 of Syntaxin-binding protein 1 OS=Homo sapiens GN=STXBP1;>sp|P61764|STXB1\_HUMAN Syntaxin-bindi 1.15E-69  
P61812-2;P61812 2|TGFB2\_HUMAN Isoform B of Transforming growth factor beta-2 OS=Homo sapiens GN=TGFB2;>sp|P61812|TGFB2\_HUMAN Transfor 1.24E-24  
P61923;Q53FU3;B4DDX8 COPZ1\_HUMAN Coatomer subunit zeta-1 OS=Homo sapiens GN=COPZ1 PE=1 SV=1;>tr|Q53FU3|Q53FU3\_HUMAN Coatomer protein c 1.20E-103  
P61956;P55854;Q6EEV6 SUMO2\_HUMAN Small ubiquitin-related modifier 2 OS=Homo sapiens GN=SUMO2 PE=1 SV=2;>sp|P55854|SUMO3\_HUMAN Small ubi 1.02E-42  
P61956;Q6EEV6 SUMO2\_HUMAN Small ubiquitin-related modifier 2 OS=Homo sapiens GN=SUMO2 PE=1 SV=2;>sp|Q6EEV6|SUMO4\_HUMAN Small ub 1.88E-46  
P61978-2;Q6IBN1;P61978 2|HNRPK\_HUMAN Isoform 2 of Heterogeneous nuclear ribonucleoprotein K OS=Homo sapiens GN=HNRNPK;>tr|Q6IBN1|Q6IBN1\_HUM 0  
P61978-3;P61978-2;P619 3|HNRPK\_HUMAN Isoform 3 of Heterogeneous nuclear ribonucleoprotein K OS=Homo sapiens GN=HNRNPK;>sp|P61978-2|HNRPK\_HU 0  
P61981;B3KNB4;B4DE78; 1433G\_HUMAN 14-3-3 protein gamma OS=Homo sapiens GN=YWHAG PE=1 SV=2;>tr|B3KNB4|B3KNB4\_HUMAN cDNA FLJ14168 fis, 3.75E-291  
P62081;Q57Z92;B5MCP9 RS7\_HUMAN 40S ribosomal protein S7 OS=Homo sapiens GN=RPS7 PE=1 SV=1;>tr|Q57Z92|Q57Z92\_HUMAN Putative uncharacterize 1.93E-62  
P62136;P36873-2;P36873 PP1A\_HUMAN Serine/threonine-protein phosphatase PP1-alpha catalytic subunit OS=Homo sapiens GN=PPP1CA PE=1 SV=1;>sp|P368 0  
P62191;Q53HB3;Q53XL8; PRS4\_HUMAN 26S protease regulatory subunit 4 OS=Homo sapiens GN=PSMC1 PE=1 SV=1;>tr|Q53HB3|Q53HB3\_HUMAN Proteasom 0  
P62195;A8K3Z3;Q59GS3 PRS8\_HUMAN 26S protease regulatory subunit 8 OS=Homo sapiens GN=PSMC5 PE=1 SV=1;>tr|A8K3Z3|A8K3Z3\_HUMAN Proteasome 1.76E-197  
P62241;Q5JR94;Q5JR95 RS8\_HUMAN 40S ribosomal protein S8 OS=Homo sapiens GN=RPS8 PE=1 SV=2;>tr|Q5JR94|Q5JR94\_HUMAN 40S ribosomal protein S 1.16E-202  
P62269;Q5SUJ3 RS18\_HUMAN 40S ribosomal protein S18 OS=Homo sapiens GN=RPS18 PE=1 SV=3;>tr|Q5SUJ3|Q5SUJ3\_HUMAN Ribosomal protein S 4.15E-97  
P62304;Q5VYJ4 RUXE\_HUMAN Small nuclear ribonucleoprotein E OS=Homo sapiens GN=SNRPE PE=1 SV=1;>sp|Q5VYJ4|RUEL1\_HUMAN Putative sma 4.25E-84  
P62304;Q5VYJ4;A6NHK2 RUXE\_HUMAN Small nuclear ribonucleoprotein E OS=Homo sapiens GN=SNRPE PE=1 SV=1;>sp|Q5VYJ4|RUEL1\_HUMAN Putative sma 8.19E-15  
P62312;Q4W5J5 LSM6\_HUMAN U6 snRNA-associated Sm-like protein LSm6 OS=Homo sapiens GN=LSM6 PE=1 SV=1;>tr|Q4W5J5|Q4W5J5\_HUMAN LS 5.57E-05  
P62314;Q7Z5A3 SMD1\_HUMAN Small nuclear ribonucleoprotein Sm D1 OS=Homo sapiens GN=SNRPD1 PE=1 SV=1;>tr|Q7Z5A3|Q7Z5A3\_HUMAN Sma 2.08E-124  
P62318;B4DJP7 SMD3\_HUMAN Small nuclear ribonucleoprotein Sm D3 OS=Homo sapiens GN=SNRPD3 PE=1 SV=1;>tr|B4DJP7|B4DJP7\_HUMAN cDNA 1.36E-09  
P62330;Q5U025;Q6FGZ2; ARF6\_HUMAN ADP-ribosylation factor 6 OS=Homo sapiens GN=ARF6 PE=1 SV=2;>tr|Q5U025|Q5U025\_HUMAN ADP-ribosylation factc 2.86E-48  
P62341;B4DTQ5;Q6IAK0 SELT\_HUMAN Selenoprotein T OS=Homo sapiens GN=SELT PE=2 SV=2;>tr|B4DTQ5|B4DTQ5\_HUMAN cDNA FLJ60886, highly similar t 2.48E-05  
P62424;Q5T8U4;Q5T8U2; RL7A\_HUMAN 60S ribosomal protein L7a OS=Homo sapiens GN=RPL7A PE=1 SV=2;>tr|Q5T8U4|Q5T8U4\_HUMAN Ribosomal protein L 1.57E-200  
P62491;B4DQU5 RB11A\_HUMAN Ras-related protein Rab-11A OS=Homo sapiens GN=RAB11A PE=1 SV=3;>tr|B4DQU5|B4DQU5\_HUMAN cDNA FLJ571 1.84E-31  
P62701;P22090;Q8TD47 RS4X\_HUMAN 40S ribosomal protein S4, X isoform OS=Homo sapiens GN=RPS4X PE=1 SV=2;>sp|P22090|RS4Y1\_HUMAN 40S ribosc 0  
P62701;Q8TD47;P22090 RS4X\_HUMAN 40S ribosomal protein S4, X isoform OS=Homo sapiens GN=RPS4X PE=1 SV=2;>sp|Q8TD47|RS4Y2\_HUMAN 40S ribos 0  
P62736;P63267 ACTA\_HUMAN Actin, aortic smooth muscle OS=Homo sapiens GN=ACTA2 PE=1 SV=1;>sp|P63267|ACTH\_HUMAN Actin, gamma-enter 0  
P62750;A8MUS3;A8MXA8 RL23A\_HUMAN 60S ribosomal protein L23a OS=Homo sapiens GN=RPL23A PE=1 SV=1;>tr|A8MUS3|A8MUS3\_HUMAN Ribosomal prot 1.36E-49  
P62820;Q5U0I6;B7Z8M7;IRAB1A\_HUMAN Ras-related protein Rab-1A OS=Homo sapiens GN=RAB1A PE=1 SV=3;>tr|Q5U0I6|Q5U0I6\_HUMAN RAB1A protein O 8.47E-266  
P62829;Q9BTQ7;C9JD32;IRL23\_HUMAN 60S ribosomal protein L23 OS=Homo sapiens GN=RPL23 PE=1 SV=1;>tr|Q9BTQ7|Q9BTQ7\_HUMAN Similar to ribosoma 2.19E-114  
P62847;Q5TOP7;P62847-3 RS24\_HUMAN 40S ribosomal protein S24 OS=Homo sapiens GN=RPS24 PE=1 SV=1;>tr|Q5TOP7|Q5TOP7\_HUMAN 40S ribosomal prot 3.40E-63  
P62854;Q5JNZ5 RS26\_HUMAN 40S ribosomal protein S26 OS=Homo sapiens GN=RPS26 PE=1 SV=3;>sp|Q5JNZ5|RS26L\_HUMAN Putative 40S ribosor 1.83E-86  
P62854;Q5JVH5;Q5JNZ5;RS26\_HUMAN 40S ribosomal protein S26 OS=Homo sapiens GN=RPS26 PE=1 SV=3;>tr|Q5JVH5|Q5JVH5\_HUMAN Ribosomal protein S 1.04E-27  
P62879;Q6FHM2;C9JXA5;|GBB2\_HUMAN Guanine nucleotide-binding protein G(I)/G(S)/G(T) subunit beta-2 OS=Homo sapiens GN=GNB2 PE=1 SV=3;>tr|Q6FHM 1.35E-116  
P62906;Q1JQ76 RL10A\_HUMAN 60S ribosomal protein L10a OS=Homo sapiens GN=RPL10A PE=1 SV=2;>tr|Q1JQ76|Q1JQ76\_HUMAN Ribosomal prote 4.97E-108  
P62913;Q5VVDO;P62913- RL11\_HUMAN 60S ribosomal protein L11 OS=Homo sapiens GN=RPL11 PE=1 SV=2;>tr|Q5VVDO|Q5VVDO\_HUMAN Ribosomal protein 1.47E-83  
P62979;P0CG48;P0CG47;IRS27A\_HUMAN Ubiquitin-40S ribosomal protein S27a OS=Homo sapiens GN=RPS27A PE=1 SV=2;>sp|P0CG48|UBC\_HUMAN Polyubiq 4.49E-230  
P63000-2;P63000;P60763 2|RAC1\_HUMAN Isoform B of Ras-related C3 botulinum toxin substrate 1 OS=Homo sapiens GN=RAC1;>sp|P63000|RAC1\_HUMAN Ra: 4.00E-63  
P63027;Q15836;P23763;F VAMP2\_HUMAN Vesicle-associated membrane protein 2 OS=Homo sapiens GN=VAMP2 PE=1 SV=3;>sp|Q15836|VAMP3\_HUMAN Vesic 3.69E-155  
P63027;Q15836;Q6FGG2; VAMP2\_HUMAN Vesicle-associated membrane protein 2 OS=Homo sapiens GN=VAMP2 PE=1 SV=3;>sp|Q15836|VAMP3\_HUMAN Vesic 1.86E-195  
P63096;P09471;P09471-2 GNAI1\_HUMAN Guanine nucleotide-binding protein G(i) subunit alpha-1 OS=Homo sapiens GN=GNAI1 PE=1 SV=2;>sp|P09471|GNAC 3.60E-41  
P63098;Q96LZ3 CANB1\_HUMAN Calcineurin subunit B type 1 OS=Homo sapiens GN=PPP3R1 PE=1 SV=2;>sp|Q96LZ3|CANB2\_HUMAN Calcineurin sub 8.11E-12  
P63167;Q6FGH9 DY1L\_HUMAN Dynein light chain 1, cytoplasmic OS=Homo sapiens GN=DYNLL1 PE=1 SV=1;>tr|Q6FGH9|Q6FGH9\_HUMAN DNCL1 pro 1.77E-21  
P63167;Q96FJ2 DY1L\_HUMAN Dynein light chain 1, cytoplasmic OS=Homo sapiens GN=DYNLL1 PE=1 SV=1;>sp|Q96FJ2|DYL2\_HUMAN Dynein light cl 1.36E-119  
P63172;Q5VTU4;Q5VTU3 DYLT1\_HUMAN Dynein light chain Tctex-type 1 OS=Homo sapiens GN=DYNLT1 PE=1 SV=1;>tr|Q5VTU4|Q5VTU4\_HUMAN Dynein, ligh 1.87E-177  
P63241-2;P63241;Q6IS14 2|IF5A1\_HUMAN Isoform 2 of Eukaryotic translation initiation factor 5A-1 OS=Homo sapiens GN=EIF5A;>sp|P63241|IF5A1\_HUMAN Ei 0  
P63261;B4E3A4;B4DVQ0 ACTG\_HUMAN Actin, cytoplasmic 2 OS=Homo sapiens GN=ACTG1 PE=1 SV=1;>tr|B4E3A4|B4E3A4\_HUMAN cDNA FLJ57283, highly si 0  
P63313;Q596K9 TYB10\_HUMAN Thymosin beta-10 OS=Homo sapiens GN=TMSB10 PE=1 SV=2;>tr|Q596K9|Q596K9\_HUMAN Migration-inducing prote 3.76E-12  
P67775;P62714 PP2AA\_HUMAN Serine/threonine-protein phosphatase 2A catalytic subunit alpha isoform OS=Homo sapiens GN=PPP2CA PE=1 SV=1;> 2.48E-262  
P67809;Q7KZ24;Q05D43; YBOX1\_HUMAN Nuclease-sensitive element-binding protein 1 OS=Homo sapiens GN=YBX1 PE=1 SV=3;>tr|Q7KZ24|Q7KZ24\_HUMAN 0  
P67936;P67936-2 TPM4\_HUMAN Tropomyosin alpha-4 chain OS=Homo sapiens GN=TPM4 PE=1 SV=3;>sp|P67936-2|TPM4\_HUMAN Isoform 2 of Troporr 8.33E-173  
P68032;P68133;P62736;P ACTC\_HUMAN Actin, alpha cardiac muscle 1 OS=Homo sapiens GN=ACTC1 PE=1 SV=1;>sp|P68133|ACTS\_HUMAN Actin, alpha skelet 0  
P68104;Q53HM9;Q53HR5 EF1A1\_HUMAN Elongation factor 1-alpha 1 OS=Homo sapiens GN=EEF1A1 PE=1 SV=1;>tr|Q53HM9|Q53HM9\_HUMAN Elongation fact 0  
P68104;Q5VTE0 EF1A1\_HUMAN Elongation factor 1-alpha 1 OS=Homo sapiens GN=EEF1A1 PE=1 SV=1;>sp|Q5VTE0|EF1A3\_HUMAN Putative elongatic 0

P68366;A8MUB1 TBA4A\_HUMAN Tubulin alpha-4A chain OS=Homo sapiens GN=TUBA4A PE=1 SV=1;>tr|A8MUB1|A8MUB1\_HUMAN Tubulin, alpha 1 (T 1.38E-258  
P68371;Q8IZ29;Q8N6N5;TBB2C\_HUMAN Tubulin beta-2C chain OS=Homo sapiens GN=TUBB2C PE=1 SV=1;>tr|Q8IZ29|Q8IZ29\_HUMAN Tubulin, beta 2C OS= 0  
P68402;Q6IBR6;A8DPS7;PA1B2\_HUMAN Platelet-activating factor acetylhydrolase IB subunit beta OS=Homo sapiens GN=PAFAH1B2 PE=1 SV=1;>tr|Q6IBR6|Q 5.47E-11  
P68431;P84243;Q16695;H31\_HUMAN Histone H3.1 OS=Homo sapiens GN=HIST1H3A PE=1 SV=2;>sp|P84243|H33\_HUMAN Histone H3.3 OS=Homo sapiens C 1.71E-15  
P68431;Q16695;Q6NXT2 H31\_HUMAN Histone H3.1 OS=Homo sapiens GN=HIST1H3A PE=1 SV=2;>sp|Q16695|H31T\_HUMAN Histone H3.1t OS=Homo sapien: 6.98E-258  
P68431;Q16695;Q71DI3;H31\_HUMAN Histone H3.1 OS=Homo sapiens GN=HIST1H3A PE=1 SV=2;>sp|Q16695|H31T\_HUMAN Histone H3.1t OS=Homo sapien: 3.42E-05  
P78330;Q53EY1;C9JBI3 SERB\_HUMAN Phosphoserine phosphatase OS=Homo sapiens GN=PSPH PE=1 SV=2;>tr|Q53EY1|Q53EY1\_HUMAN Phosphoserine pho: 5.99E-30  
P78347;P78347-3;P78347 GTF2I\_HUMAN General transcription factor II-I OS=Homo sapiens GN=GTF2I PE=1 SV=2;>sp|P78347-3|GTF2I\_HUMAN Isoform 3 of ( 0  
P78356;P78356-2 PI42B\_HUMAN Phosphatidylinositol-5-phosphate 4-kinase type-2 beta OS=Homo sapiens GN=PIP4K2B PE=1 SV=1;>sp|P78356-2|PI4 5.44E-09  
P78362-2;P78362;Q96SB-2|SRPK2\_HUMAN Isoform 2 of Serine/threonine-protein kinase SRPK2 OS=Homo sapiens GN=SRPK2;>sp|P78362|SRPK2\_HUMAN Ser 7.06E-10  
P78559-2;P78559;A8K4T72|MAP1A\_HUMAN Isoform 2 of Microtubule-associated protein 1A OS=Homo sapiens GN=MAP1A;>sp|P78559|MAP1A\_HUMAN Microtul 1.99E-08  
P79483;O19507;Q30131;IDRB3\_HUMAN HLA class II histocompatibility antigen, DR beta 3 chain OS=Homo sapiens GN=HLA-DRB3 PE=1 SV=1;>tr|O19507|O1 3.40E-19  
P82094-2;P82094;B4DQY-2|TMF1\_HUMAN Isoform 2 of TATA element modulatory factor OS=Homo sapiens GN=TMF1;>sp|P82094|TMF1\_HUMAN TATA element 1.71E-07  
P82650;A8K9Y7;Q8NBL6;RT22\_HUMAN 28S ribosomal protein S22, mitochondrial OS=Homo sapiens GN=MRPS22 PE=1 SV=1;>tr|A8K9Y7|A8K9Y7\_HUMAN cD 3.86E-47  
P82664;B4DP77;Q9BZS5 RT10\_HUMAN 28S ribosomal protein S10, mitochondrial OS=Homo sapiens GN=MRPS10 PE=1 SV=2;>tr|B4DP77|B4DP77\_HUMAN cD 1.16E-06  
P82673;P82673-2 RT35\_HUMAN 28S ribosomal protein S35, mitochondrial OS=Homo sapiens GN=MRPS35 PE=1 SV=1;>sp|P82673-2|RT35\_HUMAN Iso 6.03E-42  
P82675;P82675-2 RT05\_HUMAN 28S ribosomal protein S5, mitochondrial OS=Homo sapiens GN=MRPS5 PE=1 SV=2;>sp|P82675-2|RT05\_HUMAN Isofo 7.83E-10  
P82912;P82912-2;P82912 RT11\_HUMAN 28S ribosomal protein S11, mitochondrial OS=Homo sapiens GN=MRPS11 PE=1 SV=2;>sp|P82912-2|RT11\_HUMAN Iso 3.80E-08  
P82912;Q53FX9;Q53GJ8;RT11\_HUMAN 28S ribosomal protein S11, mitochondrial OS=Homo sapiens GN=MRPS11 PE=1 SV=2;>tr|Q53FX9|Q53FX9\_HUMAN Mi 2.30E-14  
P82914;Q59EA6;D3DPS9;RT15\_HUMAN 28S ribosomal protein S15, mitochondrial OS=Homo sapiens GN=MRPS15 PE=1 SV=1;>tr|Q59EA6|Q59EA6\_HUMAN Mi 1.00E-19  
P82921;Q5TB11 RT21\_HUMAN 28S ribosomal protein S21, mitochondrial OS=Homo sapiens GN=MRPS21 PE=1 SV=2;>tr|Q5TB11|Q5TB11\_HUMAN Mi 5.43E-54  
P82933;Q86WV4 RT09\_HUMAN 28S ribosomal protein S9, mitochondrial OS=Homo sapiens GN=MRPS9 PE=1 SV=2;>tr|Q86WV4|Q86WV4\_HUMAN MRI 6.44E-121  
P82979;Q567R9;A4D286 SARNP\_HUMAN SAP domain-containing ribonucleoprotein OS=Homo sapiens GN=SARNP PE=1 SV=3;>tr|Q567R9|Q567R9\_HUMAN CI 1.17E-40  
P83731;C9JNW5;C9JXB8 RL24\_HUMAN 60S ribosomal protein L24 OS=Homo sapiens GN=RPL24 PE=1 SV=1;>tr|C9JNW5|C9JNW5\_HUMAN Ribosomal protein l 4.26E-57  
P83916;Q6IBN6;B5MD17;CBX1\_HUMAN Chromobox protein homolog 1 OS=Homo sapiens GN=CBX1 PE=1 SV=1;>tr|Q6IBN6|Q6IBN6\_HUMAN CBX1 protein OS 9.55E-264  
P84077;P61204 ARF1\_HUMAN ADP-ribosylation factor 1 OS=Homo sapiens GN=ARF1 PE=1 SV=2;>sp|P61204|ARF3\_HUMAN ADP-ribosylation factor 3 0  
P84077;P61204;B4DEB9;ARF1\_HUMAN ADP-ribosylation factor 1 OS=Homo sapiens GN=ARF1 PE=1 SV=2;>sp|P61204|ARF3\_HUMAN ADP-ribosylation factor 3 3.31E-236  
P84095;Q61CQ8 RHOG\_HUMAN Rho-related GTP-binding protein RhoG OS=Homo sapiens GN=RHOG PE=1 SV=1;>tr|Q61CQ8|Q61CQ8\_HUMAN ARHG p 1.02E-99  
P84098;Q53G49;Q8IWR8 RL19\_HUMAN 60S ribosomal protein L19 OS=Homo sapiens GN=RPL19 PE=1 SV=1;>tr|Q53G49|Q53G49\_HUMAN Ribosomal protein l 1.20E-167  
P85037;P85037-2 FOXX1\_HUMAN Forkhead box protein K1 OS=Homo sapiens GN=FOXX1 PE=1 SV=1;>sp|P85037-2|FOXX1\_HUMAN Isoform 2 of Forkh 1.09E-23  
P98160;Q59EG0 PGBM\_HUMAN Basement membrane-specific heparan sulfate proteoglycan core protein OS=Homo sapiens GN=HSPG2 PE=1 SV=4;>tr 0  
P99999;C9JFR7 CYC\_HUMAN Cytochrome c OS=Homo sapiens GN=CYCS PE=1 SV=2;>tr|C9JFR7|C9JFR7\_HUMAN Uncharacterized protein OS=Homo 8.87E-212  
Q00059;Q6LES8;A8MRB2 TFAM\_HUMAN Transcription factor A, mitochondrial OS=Homo sapiens GN=TFAM PE=1 SV=1;>tr|Q6LES8|Q6LES8\_HUMAN TFAM prote 4.08E-33  
Q00325-2;Q53HC3;Q8NCF-2|MPCP\_HUMAN Isoform B of Phosphate carrier protein, mitochondrial OS=Homo sapiens GN=SLC25A3;>tr|Q53HC3|Q53HC3\_HUMAN 3.41E-25  
Q00403;B1APE2;B1APE1 TF2B\_HUMAN Transcription initiation factor IIB OS=Homo sapiens GN=GTF2B PE=1 SV=1;>tr|B1APE2|B1APE2\_HUMAN General trans 5.63E-14  
Q00577;Q56A79;Q2NLC9;PURA\_HUMAN Transcriptional activator protein Pur-alpha OS=Homo sapiens GN=PURA PE=1 SV=2;>tr|Q56A79|Q56A79\_HUMAN Purif 8.62E-27  
Q00613;Q53HT3;Q00613-HSF1\_HUMAN Heat shock factor protein 1 OS=Homo sapiens GN=HSF1 PE=1 SV=1;>tr|Q53HT3|Q53HT3\_HUMAN Heat shock transcri 6.52E-10  
Q00688;Q53GD8 FKBP3\_HUMAN Peptidyl-prolyl cis-trans isomerase FKBP3 OS=Homo sapiens GN=FKBP3 PE=1 SV=1;>tr|Q53GD8|Q53GD8\_HUMAN FK 1.52E-75  
Q00796;B4DKI2 DHSO\_HUMAN Sorbitol dehydrogenase OS=Homo sapiens GN=SORD PE=1 SV=4;>tr|B4DKI2|B4DKI2\_HUMAN cDNA FLJ60282, highl 2.37E-81  
Q00839;Q00839-2 HNRPU\_HUMAN Heterogeneous nuclear ribonucleoprotein U OS=Homo sapiens GN=HNRNPU PE=1 SV=6;>sp|Q00839-2|HNRPU\_HUM. 0  
Q008S8;B7Z944 ECT2L\_HUMAN Epithelial cell-transforming sequence 2 oncogene-like OS=Homo sapiens GN=ECT2L PE=2 SV=2;>tr|B7Z944|B7Z944\_ 1.89E-06  
Q01081;Q8WU68;Q8WU6;U2AF1\_HUMAN Splicing factor U2AF 35 kDa subunit OS=Homo sapiens GN=U2AF1 PE=1 SV=3;>sp|Q8WU68|U2AF4\_HUMAN Splicing 4.84E-73  
Q01082;Q01082-2;Q0108 SPTB2\_HUMAN Spectrin beta chain, brain 1 OS=Homo sapiens GN=SPTBN1 PE=1 SV=2;>sp|Q01082-2|SPTB2\_HUMAN Isoform Short 0  
Q01130;Q9BRL6;Q9BRL6-SRSF2\_HUMAN Serine/arginine-rich splicing factor 2 OS=Homo sapiens GN=SRSF2 PE=1 SV=4;>sp|Q9BRL6|SRSF8\_HUMAN Serine/a 1.08E-116  
Q01469;A8MTQ5 FABP5\_HUMAN Fatty acid-binding protein, epidermal OS=Homo sapiens GN=FABP5 PE=1 SV=3;>tr|A8MTQ5|A8MTQ5\_HUMAN Unchar 1.69E-53  
Q01581;Q5XJ04;Q8N995 HMCS1\_HUMAN Hydroxymethylglutaryl-CoA synthase, cytoplasmic OS=Homo sapiens GN=HMGS1 PE=1 SV=2;>tr|Q5XJ04|Q5XJ04\_ 3.78E-16  
Q01628;Q01629;P13164 IFM3\_HUMAN Interferon-induced transmembrane protein 3 OS=Homo sapiens GN=IFITM3 PE=1 SV=2;>sp|Q01629|IFM2\_HUMAN Int 1.32E-157  
Q01650;Q8IV97 LAT1\_HUMAN Large neutral amino acids transporter small subunit 1 OS=Homo sapiens GN=SLC7A5 PE=1 SV=2;>tr|Q8IV97|Q8IV97\_ 9.26E-88  
Q01658;Q53F47;Q658N3 NC2B\_HUMAN Protein Dr1 OS=Homo sapiens GN=DR1 PE=1 SV=1;>tr|Q53F47|Q53F47\_HUMAN Down-regulator of transcription 1 va 1.27E-05  
Q01780;Q01780-2;B4DKC EXOSX\_HUMAN Exosome component 10 OS=Homo sapiens GN=EXOSC10 PE=1 SV=2;>sp|Q01780-2|EXOSX\_HUMAN Isoform 2 of Ex 6.85E-39  
Q01804;Q7RTX8;Q01804- OTUD4\_HUMAN OTU domain-containing protein 4 OS=Homo sapiens GN=OTUD4 PE=1 SV=3;>sp|Q7RTX8|HIN1L\_HUMAN Putative HI 2.32E-07  
Q01813;Q5VSR7;B3KS15;K6PP\_HUMAN 6-phosphofructokinase type C OS=Homo sapiens GN=PFKP PE=1 SV=2;>tr|Q5VSR7|Q5VSR7\_HUMAN Phosphofructokin 0  
Q01970;Q8N1A4 PLCB3\_HUMAN 1-phosphatidylinositol-4,5-bisphosphate phosphodiesterase beta-3 OS=Homo sapiens GN=PLCB3 PE=1 SV=2;>tr|Q8N 2.16E-11  
Q01995;Q5U0D2;Q6FI52; TAGL\_HUMAN Transgelin OS=Homo sapiens GN=TAGLN PE=1 SV=4;>tr|Q5U0D2|Q5U0D2\_HUMAN Putative uncharacterized protein D 1.44E-267  
Q02083;Q02083-2;Q0208 NAAA\_HUMAN N-acylethanolamine-hydrolyzing acid amidase OS=Homo sapiens GN=NAAA PE=1 SV=3;>sp|Q02083-2|NAAA\_HUMAN 3.67E-07  
Q02252;Q53H94;Q53FN8;MMSA\_HUMAN Methylmalonate-semialdehyde dehydrogenase [acylating], mitochondrial OS=Homo sapiens GN=ALDH6A1 PE=1 SV=2 8.59E-140  
Q02750;Q02750-2;P3650.MP2K1\_HUMAN Dual specificity mitogen-activated protein kinase kinase 1 OS=Homo sapiens GN=MAP2K1 PE=1 SV=2;>sp|Q02750-2 4.76E-10  
Q02880;Q02880-2;Q71UF TOP2B\_HUMAN DNA topoisomerase 2-beta OS=Homo sapiens GN=TOP2B PE=1 SV=3;>sp|Q02880-2|TOP2B\_HUMAN Isoform Beta-1 8.74E-17  
Q02952;Q02952-2;Q0295 AKA12\_HUMAN A-kinase anchor protein 12 OS=Homo sapiens GN=AKAP12 PE=1 SV=4;>sp|Q02952-2|AKA12\_HUMAN Isoform 2 of A 2.65E-70  
Q02978;Q6IBH0 M2OM\_HUMAN Mitochondrial 2-oxoglutarate/malate carrier protein OS=Homo sapiens GN=SLC25A11 PE=1 SV=3;>tr|Q6IBH0|Q6IBH 3.09E-75  
Q03013;Q03013-2;A6NNT GSTM4\_HUMAN Glutathione S-transferase Mu 4 OS=Homo sapiens GN=GSTM4 PE=1 SV=3;>sp|Q03013-2|GSTM4\_HUMAN Isoform 2 1.56E-89

Q03113;Q5PPR5;B3KXS2; GNA12\_HUMAN Guanine nucleotide-binding protein subunit alpha-12 OS=Homo sapiens GN=GNA12 PE=1 SV=4;>tr|Q5PPR5|Q5PPR5\_ 1.81E-17  
 Q03591;B1AKG0 FHR1\_HUMAN Complement factor H-related protein 1 OS=Homo sapiens GN=CFHR1 PE=1 SV=2;>tr|B1AKG0|B1AKG0\_HUMAN Compl 1.62E-61  
 Q04323-2;Q04323;B4E0P;2|UBXN1\_HUMAN Isoform 2 of UBX domain-containing protein 1 OS=Homo sapiens GN=UBXN1;>sp|Q04323|UBXN1\_HUMAN UBX dor 2.06E-19  
 Q04721;P46531 NOTC2\_HUMAN Neurogenic locus notch homolog protein 2 OS=Homo sapiens GN=NOTCH2 PE=1 SV=3;>sp|P46531|NOTC1\_HUMAN N 3.37E-07  
 Q04721;Q96JU8;Q9UFD5; NOTC2\_HUMAN Neurogenic locus notch homolog protein 2 OS=Homo sapiens GN=NOTCH2 PE=1 SV=3;>tr|Q96JU8|Q96JU8\_HUMAN 3.74E-06  
 Q04726;Q04726-4;Q6PI5;TLE3\_HUMAN Transducin-like enhancer protein 3 OS=Homo sapiens GN=TLE3 PE=1 SV=2;>sp|Q04726-4|TLE3\_HUMAN Isoform 4 of 6.61E-09  
 Q04826;P30485;P30461 1B40\_HUMAN HLA class I histocompatibility antigen, B-40 alpha chain OS=Homo sapiens GN=HLA-B PE=1 SV=1;>sp|P30485|1B47\_H 0  
 Q04917;B2R6N6;Q9H4N8;1433F\_HUMAN 14-3-3 protein eta OS=Homo sapiens GN=YWHAH PE=1 SV=4;>tr|B2R6N6|B2R6N6\_HUMAN cDNA, FLJ93036, highly 6.75E-152  
 Q05048;Q5QPD8;B4DDG3 CSTF1\_HUMAN Cleavage stimulation factor subunit 1 OS=Homo sapiens GN=CSTF1 PE=1 SV=1;>tr|Q5QPD8|Q5QPD8\_HUMAN Cleava 1.08E-21  
 Q05519;Q8IWE6;Q6PJB9; SRS11\_HUMAN Serine/arginine-rich splicing factor 11 OS=Homo sapiens GN=SRSF11 PE=1 SV=1;>tr|Q8IWE6|Q8IWE6\_HUMAN Splic 5.18E-22  
 Q05655;B4DFV1 KPCD\_HUMAN Protein kinase C delta type OS=Homo sapiens GN=PRKCD PE=1 SV=2;>tr|B4DFV1|B4DFV1\_HUMAN cDNA FLJ57052, h 9.73E-49  
 Q05682-5;Q05682-3;Q0515|CALD1\_HUMAN Isoform 5 of Caldesmon OS=Homo sapiens GN=CALD1;>sp|Q05682-3|CALD1\_HUMAN Isoform 3 of Caldesmon OS= 1.59E-243  
 Q06265-2;Q06265;Q0626 2|EXOS9\_HUMAN Isoform 2 of Exosome complex component RRP45 OS=Homo sapiens GN=EXOSC9;>sp|Q06265|EXOS9\_HUMAN Exc 3.56E-35  
 Q06323;Q6IBM2;A6NJJG9; PSME1\_HUMAN Proteasome activator complex subunit 1 OS=Homo sapiens GN=PSME1 PE=1 SV=1;>tr|Q6IBM2|Q6IBM2\_HUMAN PSM 4.55E-260  
 Q06330;Q06330-6;Q0633 SUH\_HUMAN Recombining binding protein suppressor of hairless OS=Homo sapiens GN=RBPJ PE=1 SV=3;>sp|Q06330-6|SUH\_HUMA 1.97E-06  
 Q06828;B4E1J3;B3KS64;(FMOD\_HUMAN Fibromodulin OS=Homo sapiens GN=FMOD PE=1 SV=2;>tr|B4E1J3|B4E1J3\_HUMAN cDNA FLJ53615, highly similar to 9.24E-89  
 Q07020;Q0QEW2;B4DDY5 RL18\_HUMAN 60S ribosomal protein L18 OS=Homo sapiens GN=RPL18 PE=1 SV=2;>tr|Q0QEW2|Q0QEW2\_HUMAN Ribosomal protein 3.68E-65  
 Q07065;Q07065-2;B3KVX CKAP4\_HUMAN Cytoskeleton-associated protein 4 OS=Homo sapiens GN=CKAP4 PE=1 SV=2;>sp|Q07065-2|CKAP4\_HUMAN Isoform : 0  
 Q07866-9;Q07866-4;Q7R 9|KLC1\_HUMAN Isoform I of Kinesin light chain 1 OS=Homo sapiens GN=KLC1;>sp|Q07866-4|KLC1\_HUMAN Isoform J of Kinesin light 2.21E-78  
 Q08379;Q08379-2 GOGA2\_HUMAN Golgin subfamily A member 2 OS=Homo sapiens GN=GOLGA2 PE=1 SV=3;>sp|Q08379-2|GOGA2\_HUMAN Isoform 2 2.77E-103  
 Q08380;B4DVE1;B4DDG4 LG3BP\_HUMAN Galectin-3-binding protein OS=Homo sapiens GN=LGALS3BP PE=1 SV=1;>tr|B4DVE1|B4DVE1\_HUMAN cDNA FLJ5347 2.58E-174  
 Q08431;Q08431-3 MFGM\_HUMAN Lactadherin OS=Homo sapiens GN=MFGE8 PE=1 SV=2;>sp|Q08431-3|MFGM\_HUMAN Isoform 3 of Lactadherin OS=Hc 1.89E-10  
 Q08752;Q6FGM6 PPID\_HUMAN Peptidyl-prolyl cis-trans isomerase D OS=Homo sapiens GN=PPID PE=1 SV=3;>tr|Q6FGM6|Q6FGM6\_HUMAN PPID prote 1.75E-61  
 Q08AM6;B4DMP4;Q9NW5|VAC14\_HUMAN Protein VAC14 homolog OS=Homo sapiens GN=VAC14 PE=1 SV=1;>tr|B4DMP4|B4DMP4\_HUMAN cDNA FLJ53136, hig 5.67E-27  
 Q09028;Q09028-3;Q0902 RBBP4\_HUMAN Histone-binding protein RBBP4 OS=Homo sapiens GN=RBBP4 PE=1 SV=3;>sp|Q09028-3|RBBP4\_HUMAN Isoform 3 of 8.03E-227  
 Q09666;B5MEH8 AHNK\_HUMAN Neuroblast differentiation-associated protein AHNK OS=Homo sapiens GN=AHNAK PE=1 SV=2;>tr|B5MEH8|B5MEH8\_ 0  
 Q0JRZ9;Q0JRZ9-2 FCHO2\_HUMAN FCH domain only protein 2 OS=Homo sapiens GN=FCHO2 PE=1 SV=2;>sp|Q0JRZ9-2|FCHO2\_HUMAN Isoform 2 of FC 3.27E-09  
 Q10471;B7Z6K2;B7Z8V8 GALT2\_HUMAN Polypeptide N-acetylgalactosaminyltransferase 2 OS=Homo sapiens GN=GALNT2 PE=1 SV=1;>tr|B7Z6K2|B7Z6K2\_HU 6.58E-63  
 Q10713;Q5SXM9;B4DKL3 MPPA\_HUMAN Mitochondrial-processing peptidase subunit alpha OS=Homo sapiens GN=PMPCA PE=1 SV=2;>tr|Q5SXM9|Q5SXM9\_HU 5.44E-24  
 Q12849;B3KW50;B7Z3R7 GRSF1\_HUMAN G-rich sequence factor 1 OS=Homo sapiens GN=GRSF1 PE=1 SV=3;>tr|B3KW50|B3KW50\_HUMAN cDNA FLJ42130 fis 3.86E-67  
 Q12882;Q32NB0;Q96HL6 DPYD\_HUMAN Dihydropyrimidine dehydrogenase [NADP+] OS=Homo sapiens GN=DPYD PE=1 SV=2;>tr|Q32NB0|Q32NB0\_HUMAN DI 9.01E-08  
 Q12888-2;Q12888;A6NNK 2|TP53B\_HUMAN Isoform 2 of Tumor suppressor p53-binding protein 1 OS=Homo sapiens GN=TP53BP1;>sp|Q12888|TP53B\_HUMAN 6.57E-06  
 Q12904;B4DNK3 AIMP1\_HUMAN Aminoacyl tRNA synthase complex-interacting multifunctional protein 1 OS=Homo sapiens GN=AIMP1 PE=1 SV=2;>tr| 8.95E-134  
 Q12905;Q53FG3;B4DY09 ILF2\_HUMAN Interleukin enhancer-binding factor 2 OS=Homo sapiens GN=ILF2 PE=1 SV=2;>tr|Q53FG3|Q53FG3\_HUMAN Interleukin 4.46E-141  
 Q12906;Q12906-3;Q1290 ILF3\_HUMAN Interleukin enhancer-binding factor 3 OS=Homo sapiens GN=ILF3 PE=1 SV=3;>sp|Q12906-3|ILF3\_HUMAN Isoform 3 of 1.50E-270  
 Q12906;Q12906-3;Q1290 ILF3\_HUMAN Interleukin enhancer-binding factor 3 OS=Homo sapiens GN=ILF3 PE=1 SV=3;>sp|Q12906-3|ILF3\_HUMAN Isoform 3 of 2.49E-170  
 Q12972;Q561W4;Q5TEJ4; PP1R8\_HUMAN Nuclear inhibitor of protein phosphatase 1 OS=Homo sapiens GN=PPP1R8 PE=1 SV=2;>tr|Q561W4|Q561W4\_HUMAN 1.42E-07  
 Q12974;Q12974-2;Q9309 TP4A2\_HUMAN Protein tyrosine phosphatase type IVA 2 OS=Homo sapiens GN=PTP4A2 PE=1 SV=1;>sp|Q12974-2|TP4A2\_HUMAN Isi 1.37E-22  
 Q13045;B4DIX0;B4DIL0;(FLII\_HUMAN Protein flightless-1 homolog OS=Homo sapiens GN=FLII PE=1 SV=2;>tr|B4DIX0|B4DIX0\_HUMAN cDNA FLJ50778, highl 1.91E-97  
 Q13148-2;Q13148 2|TADBP\_HUMAN Isoform 2 of TAR DNA-binding protein 43 OS=Homo sapiens GN=TARDBP;>sp|Q13148|TADBP\_HUMAN TAR DNA-bin 8.77E-249  
 Q13177;A8K5M4 PAK2\_HUMAN Serine/threonine-protein kinase PAK 2 OS=Homo sapiens GN=PAK2 PE=1 SV=3;>tr|A8K5M4|A8K5M4\_HUMAN cDNA FL 1.71E-293  
 Q13228;Q13228-2 SBP1\_HUMAN Selenium-binding protein 1 OS=Homo sapiens GN=SELENBP1 PE=1 SV=2;>sp|Q13228-2|SBP1\_HUMAN Isoform 2 of S 0  
 Q13232;Q9NUF9 NDK3\_HUMAN Nucleoside diphosphate kinase 3 OS=Homo sapiens GN=NME3 PE=1 SV=2;>tr|Q9NUF9|Q9NUF9\_HUMAN Nucleoside d 2.67E-53  
 Q13242;A8K3M9 SRSF9\_HUMAN Serine/arginine-rich splicing factor 9 OS=Homo sapiens GN=SRSF9 PE=1 SV=1;>tr|A8K3M9|A8K3M9\_HUMAN cDNA F 5.46E-12  
 Q13243;Q13243-3;Q1324 SRSF5\_HUMAN Serine/arginine-rich splicing factor 5 OS=Homo sapiens GN=SRSF5 PE=1 SV=1;>sp|Q13243-3|SRSF5\_HUMAN Isoform 1.38E-29  
 Q13277;Q53YE2;B4DME0;STX3\_HUMAN Syntaxin-3 OS=Homo sapiens GN=STX3 PE=1 SV=3;>tr|Q53YE2|Q53YE2\_HUMAN Syntaxin 3A OS=Homo sapiens GN= 2.64E-06  
 Q13283;Q5U0Q1;Q6FI03; G3BP1\_HUMAN Ras GTPase-activating protein-binding protein 1 OS=Homo sapiens GN=G3BP1 PE=1 SV=1;>tr|Q5U0Q1|Q5U0Q1\_HUI 4.76E-264  
 Q13330;Q59FW1;Q13330 TPA1\_HUMAN Metastasis-associated protein MTA1 OS=Homo sapiens GN=MTA1 PE=1 SV=2;>tr|Q59FW1|Q59FW1\_HUMAN Metastasi: 2.20E-20  
 Q13347;Q5U0F4;Q53HU7 EIF3I\_HUMAN Eukaryotic translation initiation factor 3 subunit I OS=Homo sapiens GN=EIF3I PE=1 SV=1;>tr|Q5U0F4|Q5U0F4\_HUMA 9.66E-86  
 Q13363;Q7Z2Q5;Q4KMQ8 CTBP1\_HUMAN C-terminal-binding protein 1 OS=Homo sapiens GN=CTBP1 PE=1 SV=2;>tr|Q7Z2Q5|Q7Z2Q5\_HUMAN C-terminal bind 7.18E-24  
 Q13405;Q59GE9 RM49\_HUMAN 39S ribosomal protein L49, mitochondrial OS=Homo sapiens GN=MRPL49 PE=1 SV=1;>tr|Q59GE9|Q59GE9\_HUMAN Mi 1.73E-17  
 Q13416;B4DYU9 ORC2\_HUMAN Origin recognition complex subunit 2 OS=Homo sapiens GN=ORC2L PE=1 SV=2;>tr|B4DYU9|B4DYU9\_HUMAN cDNA FL 1.00E-10  
 Q13423;Q2TB59;D6RAI5; NNTM\_HUMAN NAD(P) transhydrogenase, mitochondrial OS=Homo sapiens GN=NNT PE=1 SV=3;>tr|Q2TB59|Q2TB59\_HUMAN Nicotir 1.89E-37  
 Q13428-4;Q13428-3;Q13 4|TCOF\_HUMAN Isoform 4 of Treacle protein OS=Homo sapiens GN=TCOF1;>sp|Q13428-3|TCOF\_HUMAN Isoform 3 of Treacle protein 3.16E-67  
 Q13435;Q7Z3K9 SF3B2\_HUMAN Splicing factor 3B subunit 2 OS=Homo sapiens GN=SF3B2 PE=1 SV=2;>tr|Q7Z3K9|Q7Z3K9\_HUMAN Putative unchara 1.12E-181  
 Q13443;Q13443-2 ADAM9\_HUMAN Disintegrin and metalloproteinase domain-containing protein 9 OS=Homo sapiens GN=ADAM9 PE=1 SV=1;>sp|Q134 8.48E-18  
 Q13451;Q2TA84;Q53GX4; FKBP5\_HUMAN Peptidyl-prolyl cis-trans isomerase FKBP5 OS=Homo sapiens GN=FKBP5 PE=1 SV=2;>tr|Q2TA84|Q2TA84\_HUMAN FK5 3.50E-204  
 Q13501;Q13501-2;B4E3V SQSTM1\_HUMAN Sequestosome-1 OS=Homo sapiens GN=SQSTM1 PE=1 SV=1;>sp|Q13501-2|SQSTM1\_HUMAN Isoform 2 of Sequestos 8.45E-213  
 Q13505;Q13505-3 MTX1\_HUMAN Metaxin-1 OS=Homo sapiens GN=MTX1 PE=1 SV=2;>sp|Q13505-3|MTX1\_HUMAN Isoform 3 of Metaxin-1 OS=Homo s 3.33E-15  
 Q13526;B3KUM4 PIN1\_HUMAN Peptidyl-prolyl cis-trans isomerase NIMA-interacting 1 OS=Homo sapiens GN=PIN1 PE=1 SV=1;>tr|B3KUM4|B3KUM4\_H 6.33E-144  
 Q13546;Q13546-2 RIPK1\_HUMAN Receptor-interacting serine/threonine-protein kinase 1 OS=Homo sapiens GN=RIPK1 PE=1 SV=3;>sp|Q13546-2|RIPK: 1.88E-43

|                                                                                                                                                 |           |
|-------------------------------------------------------------------------------------------------------------------------------------------------|-----------|
| Q13547;Q6IT96;B5BU61;HDAC1_HUMAN Histone deacetylase 1 OS=Homo sapiens GN=HDAC1 PE=1 SV=1;>tr Q6IT96 Q6IT96_HUMAN HDAC1 protein OS=Hc           | 1.65E-68  |
| Q13576;Q13576-2 IQGA2_HUMAN Ras GTPase-activating-like protein IQGAP2 OS=Homo sapiens GN=IQGAP2 PE=1 SV=4;>sp Q13576-2 IQGA2_HUMAN              | 2.35E-119 |
| Q13596;Q53GY8;Q53HL9;SNX1_HUMAN Sorting nexin-1 OS=Homo sapiens GN=SNX1 PE=1 SV=3;>tr Q53GY8 Q53GY8_HUMAN Sorting nexin 1 isoform a varia       | 2.43E-131 |
| Q13610;Q53FW9;Q9BV37 PWP1_HUMAN Periodic tryptophan protein 1 homolog OS=Homo sapiens GN=PWP1 PE=1 SV=1;>tr Q53FW9 Q53FW9_HUMAN Nuclea          | 5.52E-06  |
| Q13618;Q53S54;Q13618- CUL3_HUMAN Cullin-3 OS=Homo sapiens GN=CUL3 PE=1 SV=2;>tr Q53S54 Q53S54_HUMAN Putative uncharacterized protein CUL3       | 2.56E-77  |
| Q13619;Q13619-2 CUL4A_HUMAN Cullin-4A OS=Homo sapiens GN=CUL4A PE=1 SV=3;>sp Q13619-2 CUL4A_HUMAN Isoform 2 of Cullin-4A OS=Homo                | 3.17E-104 |
| Q13620;Q13620-1;Q1362 CUL4B_HUMAN Cullin-4B OS=Homo sapiens GN=CUL4B PE=1 SV=4;>sp Q13620-1 CUL4B_HUMAN Isoform 2 of Cullin-4B OS=Homo          | 5.97E-23  |
| Q13724;Q58F09;C9J8D4;MOGS_HUMAN Mannosyl-oligosaccharide glucosidase OS=Homo sapiens GN=MOGS PE=1 SV=5;>tr Q58F09 Q58F09_HUMAN Glucosid         | 2.00E-82  |
| Q13740;Q13740-2 CD166_HUMAN CD166 antigen OS=Homo sapiens GN=ALCAM PE=1 SV=2;>sp Q13740-2 CD166_HUMAN Isoform 2 of CD166 antiger                | 2.12E-267 |
| Q13813;Q13813-3;Q1381 SPTA2_HUMAN Spectrin alpha chain, brain OS=Homo sapiens GN=SPTAN1 PE=1 SV=3;>sp Q13813-3 SPTA2_HUMAN Isoform 3 of Sp      | 0         |
| Q13867;B4DXF3 BLMH_HUMAN Bleomycin hydrolase OS=Homo sapiens GN=BLMH PE=1 SV=1;>tr B4DXF3 B4DXF3_HUMAN cDNA FLJ57650, highly si                 | 5.31E-45  |
| Q13885;B2R6L0 TBB2A_HUMAN Tubulin beta-2A chain OS=Homo sapiens GN=TUBB2A PE=1 SV=1;>tr B2R6L0 B2R6L0_HUMAN cDNA, FLJ93005, high                | 0         |
| Q13885;Q9BVA1 TBB2A_HUMAN Tubulin beta-2A chain OS=Homo sapiens GN=TUBB2A PE=1 SV=1;>sp Q9BVA1 TBB2B_HUMAN Tubulin beta-2B chain                | 0         |
| Q13895;Q5T8J2 BYST_HUMAN Bystin OS=Homo sapiens GN=BYSL PE=1 SV=3;>tr Q5T8J2 Q5T8J2_HUMAN Bystin-like OS=Homo sapiens GN=BYSL P                 | 8.32E-42  |
| Q13907-2;Q13907;C9JKM 2 IDI1_HUMAN Isoform 2 of Isopentenyl-diphosphate Delta-isomerase 1 OS=Homo sapiens GN=IDI1;>sp Q13907 IDI1_HUMAN Isop    | 5.11E-34  |
| Q13951;Q13951-2 PEBB_HUMAN Core-binding factor subunit beta OS=Homo sapiens GN=CBFB PE=1 SV=2;>sp Q13951-2 PEBB_HUMAN Isoform 2 of C            | 4.74E-10  |
| Q14005;Q14005-2;Q1400 IL16_HUMAN Pro-interleukin-16 OS=Homo sapiens GN=IL16 PE=1 SV=4;>sp Q14005-2 IL16_HUMAN Isoform 2 of Pro-interleukin-16   | 2.63E-17  |
| Q14011;Q53XX5;D6W5Y5 CIRBP_HUMAN Cold-inducible RNA-binding protein OS=Homo sapiens GN=CIRBP PE=1 SV=1;>tr Q53XX5 Q53XX5_HUMAN Cold indu        | 7.51E-88  |
| Q14103-4;Q14103-2;Q14.4 HNRPD_HUMAN Isoform 4 of Heterogeneous nuclear ribonucleoprotein D0 OS=Homo sapiens GN=HNRNPD;>sp Q14103-2 HNRPD_I      | 7.98E-129 |
| Q14103;Q14103-3 HNRPD_HUMAN Heterogeneous nuclear ribonucleoprotein D0 OS=Homo sapiens GN=HNRNPD PE=1 SV=1;>sp Q14103-3 HNRPD_HU                | 0         |
| Q14108;Q53Y63;B4DKD8 SCR2_HUMAN Lysosome membrane protein 2 OS=Homo sapiens GN=SCARB2 PE=1 SV=2;>tr Q53Y63 Q53Y63_HUMAN Scavenger r             | 2.87E-57  |
| Q14112;Q8IV28;Q14112- NID2_HUMAN Nidogen-2 OS=Homo sapiens GN=NID2 PE=1 SV=3;>tr Q8IV28 Q8IV28_HUMAN NID2 protein OS=Homo sapiens GN=           | 2.31E-18  |
| Q14139-2;Q14139;B4DK3 2 UBE4A_HUMAN Isoform 2 of Ubiquitin conjugation factor E4 A OS=Homo sapiens GN=UBE4A;>sp Q14139 UBE4A_HUMAN Ubiquitin    | 1.44E-23  |
| Q14141;Q14141-4;Q1414 SEPT6_HUMAN Septin-6 OS=Homo sapiens GN=SEPT6 PE=1 SV=4;>sp Q14141-4 SEPT6_HUMAN Isoform V of Septin-6 OS=Homo sa         | 7.29E-32  |
| Q14152;Q24JU4;B4DYS1; EIF3A_HUMAN Eukaryotic translation initiation factor 3 subunit A OS=Homo sapiens GN=EIF3A PE=1 SV=1;>tr Q24JU4 Q24JU4_HUM | 1.21E-159 |
| Q14157;Q14157-3;Q1415 UBP2L_HUMAN Ubiquitin-associated protein 2-like OS=Homo sapiens GN=UBAP2L PE=1 SV=2;>sp Q14157-3 UBP2L_HUMAN Isoform      | 1.11E-139 |
| Q14160-3;Q14160;Q1416 3 SCRIB_HUMAN Isoform 3 of Protein scribble homolog OS=Homo sapiens GN=SCRIB;>sp Q14160 SCRIB_HUMAN Protein scribble hc   | 1.46E-56  |
| Q14166;B1AH89 TTL12_HUMAN Tubulin--tyrosine ligase-like protein 12 OS=Homo sapiens GN=TLL12 PE=1 SV=2;>tr B1AH89 B1AH89_HUMAN Tubul             | 5.89E-69  |
| Q14240-2;Q14240 2 IF4A2_HUMAN Isoform 2 of Eukaryotic initiation factor 4A-II OS=Homo sapiens GN=EIF4A2;>sp Q14240 IF4A2_HUMAN Eukaryotic       | 8.77E-273 |
| Q14247;Q53HG7;Q96H99 SRC8_HUMAN Src substrate cortactin OS=Homo sapiens GN=CTTN PE=1 SV=2;>tr Q53HG7 Q53HG7_HUMAN Cortactin isoform a var       | 0         |
| Q14254;Q9BTI6;Q6FG43 FLOT2_HUMAN Flotillin-2 OS=Homo sapiens GN=FLOT2 PE=1 SV=2;>tr Q9BTI6 Q9BTI6_HUMAN FLOT2 protein OS=Homo sapiens GN        | 5.04E-14  |
| Q14315;Q14315-2;Q59H9 FLNC_HUMAN Filamin-C OS=Homo sapiens GN=FLNC PE=1 SV=3;>sp Q14315-2 FLNC_HUMAN Isoform 2 of Filamin-C OS=Homo sap         | 0         |
| Q14318-2;Q14318;B2R8G 2 FKBP8_HUMAN Isoform 2 of Peptidyl-prolyl cis-trans isomerase FKBP8 OS=Homo sapiens GN=FKBP8;>sp Q14318 FKBP8_HUMAN P    | 6.08E-144 |
| Q14320;B0S8I6 FA50A_HUMAN Protein FAM50A OS=Homo sapiens GN=FAM50A PE=1 SV=2;>tr B0S8I6 B0S8I6_HUMAN Family with sequence similar               | 1.15E-29  |
| Q14344;B4DWV9;B7Z7R0 GNA13_HUMAN Guanine nucleotide-binding protein subunit alpha-13 OS=Homo sapiens GN=GNA13 PE=1 SV=2;>tr B4DWV9 B4DWV        | 1.37E-37  |
| Q14344;Q03113 GNA13_HUMAN Guanine nucleotide-binding protein subunit alpha-13 OS=Homo sapiens GN=GNA13 PE=1 SV=2;>sp Q03113 GNA12_              | 6.72E-13  |
| Q14376;Q38G75;B3KQ39; GALE_HUMAN UDP-glucose 4-epimerase OS=Homo sapiens GN=GALE PE=1 SV=2;>tr Q38G75 Q38G75_HUMAN UDP galactose 4-epir         | 6.95E-29  |
| Q14520;B7Z8U5 HABP2_HUMAN Hyaluronan-binding protein 2 OS=Homo sapiens GN=HABP2 PE=1 SV=1;>tr B7Z8U5 B7Z8U5_HUMAN cDNA FLJ5160                  | 2.62E-07  |
| Q14558-2;Q14558;B4DP3 2 KPRA_HUMAN Isoform 2 of Phosphoribosyl pyrophosphate synthase-associated protein 1 OS=Homo sapiens GN=PRPSAP1;>sp Q14!  | 3.52E-57  |
| Q14566;Q4ZG57;B4DRF6 MCM6_HUMAN DNA replication licensing factor MCM6 OS=Homo sapiens GN=MCM6 PE=1 SV=1;>tr Q4ZG57 Q4ZG57_HUMAN Putativ         | 1.18E-120 |
| Q14671;Q14671-2;Q8TB7 PUM1_HUMAN Pumilio homolog 1 OS=Homo sapiens GN=PUM1 PE=1 SV=3;>sp Q14671-2 PUM1_HUMAN Isoform 2 of Pumilio homol         | 6.41E-12  |
| Q14683;Q6P2R1;A8K7A6; SMC1A_HUMAN Structural maintenance of chromosomes protein 1A OS=Homo sapiens GN=SMC1A PE=1 SV=2;>tr Q6P2R1 Q6P2R1_        | 1.29E-47  |
| Q14684;Q14684-2 RRP1B_HUMAN Ribosomal RNA processing protein 1 homolog B OS=Homo sapiens GN=RRP1B PE=1 SV=3;>sp Q14684-2 RRP1B_HU               | 7.11E-12  |
| Q14691;B4DGH0 PSF1_HUMAN DNA replication complex GINS protein PSF1 OS=Homo sapiens GN=GINS1 PE=1 SV=1;>tr B4DGH0 B4DGH0_HUMAN c                 | 6.27E-19  |
| Q14694-2;Q14694;Q1469 2 UBP10_HUMAN Isoform 2 of Ubiquitin carboxyl-terminal hydrolase 10 OS=Homo sapiens GN=USP10;>sp Q14694 UBP10_HUMAN U     | 1.42E-16  |
| Q14739;C9JXK0;B4E0Z3 LBR_HUMAN Lamin-B receptor OS=Homo sapiens GN=LBR PE=1 SV=2;>tr C9JXK0 C9JXK0_HUMAN Uncharacterized protein OS=Hor         | 4.04E-07  |
| Q14764;B4DDR2;B4DXN0 MVP_HUMAN Major vault protein OS=Homo sapiens GN=MVP PE=1 SV=4;>tr B4DDR2 B4DDR2_HUMAN cDNA FLJ54588, highly simil         | 1.24E-168 |
| Q14767;Q6AZ94;Q59EE6 LTBP2_HUMAN Latent-transforming growth factor beta-binding protein 2 OS=Homo sapiens GN=LTBP2 PE=1 SV=3;>tr Q6AZ94 Q6AZ    | 2.49E-10  |
| Q14847;Q14847-2;C9JVR; LASP1_HUMAN LIM and SH3 domain protein 1 OS=Homo sapiens GN=LASP1 PE=1 SV=2;>sp Q14847-2 LASP1_HUMAN Isoform 2 of        | 1.32E-109 |
| Q14914;B4DPK3;Q5JVP3 PTGR1_HUMAN Prostaglandin reductase 1 OS=Homo sapiens GN=PTGR1 PE=1 SV=2;>tr B4DPK3 B4DPK3_HUMAN cDNA FLJ59730, h          | 3.55E-55  |
| Q14978-2;Q14978-3;Q14.2 NOLC1_HUMAN Isoform Beta of Nucleolar and coiled-body phosphoprotein 1 OS=Homo sapiens GN=NOLC1;>sp Q14978-3 NOLC1_     | 1.55E-44  |
| Q14978-2;Q14978;Q1497 2 NOLC1_HUMAN Isoform Beta of Nucleolar and coiled-body phosphoprotein 1 OS=Homo sapiens GN=NOLC1;>sp Q14978 NOLC1_HL     | 2.09E-84  |
| Q14997;Q14997-2;Q1499 PSME4_HUMAN Proteasome activator complex subunit 4 OS=Homo sapiens GN=PSME4 PE=1 SV=2;>sp Q14997-2 PSME4_HUMAN Is         | 2.50E-08  |
| Q15005;B4DDB9 SPCS2_HUMAN Signal peptidase complex subunit 2 OS=Homo sapiens GN=SPCS2 PE=1 SV=3;>tr B4DDB9 B4DDB9_HUMAN cDNA FL                 | 1.31E-41  |
| Q15008;C9IZE4;Q6UV22;PSMD6_HUMAN 26S proteasome non-ATPase regulatory subunit 6 OS=Homo sapiens GN=PSMD6 PE=1 SV=1;>tr C9IZE4 C9IZE4_HU         | 1.77E-86  |
| Q15019-2;Q15019;B5MCX 2 SEPT2_HUMAN Isoform 2 of Septin-2 OS=Homo sapiens GN=SEPT2;>sp Q15019 SEPT2_HUMAN Septin-2 OS=Homo sapiens GN=S         | 2.25E-204 |
| Q15020;Q15020-2 SART3_HUMAN Squamous cell carcinoma antigen recognized by T-cells 3 OS=Homo sapiens GN=SART3 PE=1 SV=1;>sp Q15020-2 S           | 7.44E-91  |
| Q15046;Q15046-2 SYK_HUMAN Lysyl-tRNA synthetase OS=Homo sapiens GN=KARS PE=1 SV=3;>sp Q15046-2 SYK_HUMAN Isoform Mitochondrial of L             | 1.01E-177 |
| Q15084-2;Q15084 2 PDIA6_HUMAN Isoform 2 of Protein disulfide-isomerase A6 OS=Homo sapiens GN=PDIA6;>sp Q15084 PDIA6_HUMAN Protein disulf        | 0         |
| Q15113;A4D2D2;B4DPJ4 PCOC1_HUMAN Procollagen C-endopeptidase enhancer 1 OS=Homo sapiens GN=PCOLCE PE=1 SV=2;>tr A4D2D2 A4D2D2_HUMAN P           | 4.67E-57  |
| Q15124;Q15124-2;A6NIQ PGM5_HUMAN Phosphoglucomutase-like protein 5 OS=Homo sapiens GN=PGM5 PE=1 SV=2;>sp Q15124-2 PGM5_HUMAN Isoform 2          | 1.31E-10  |



|                       |                                                                                                                             |           |
|-----------------------|-----------------------------------------------------------------------------------------------------------------------------|-----------|
| Q15126;Q6FGV9         | PMVK_HUMAN Phosphomevalonate kinase OS=Homo sapiens GN=PMVK PE=1 SV=3;>tr Q6FGV9 Q6FGV9_HUMAN PMVK protein (Frag            | 7.38E-10  |
| Q15149;Q15149-2;Q1514 | PLEC_HUMAN Plectin OS=Homo sapiens GN=PLEC PE=1 SV=3;>sp Q15149-2 PLEC_HUMAN Isoform 2 of Plectin OS=Homo sapiens G         | 0         |
| Q15181;Q5SQT6         | IPYR_HUMAN Inorganic pyrophosphatase OS=Homo sapiens GN=PPA1 PE=1 SV=2;>tr Q5SQT6 Q5SQT6_HUMAN Pyrophosphatase (I           | 3.49E-205 |
| Q15257;Q15257-2;Q1525 | PTPA_HUMAN Serine/threonine-protein phosphatase 2A activator OS=Homo sapiens GN=PPP2R4 PE=1 SV=3;>sp Q15257-2 PTPA_HL       | 1.91E-19  |
| Q15257;Q15257-2;Q1525 | PTPA_HUMAN Serine/threonine-protein phosphatase 2A activator OS=Homo sapiens GN=PPP2R4 PE=1 SV=3;>sp Q15257-2 PTPA_HL       | 2.37E-22  |
| Q15276;Q15276-2;B4DM  | RABE1_HUMAN Rab GTPase-binding effector protein 1 OS=Homo sapiens GN=RABE1 PE=1 SV=2;>sp Q15276-2 RABE1_HUMAN Isof          | 1.06E-52  |
| Q15363;Q6FHT8;B4DP27  | TMED2_HUMAN Transmembrane emp24 domain-containing protein 2 OS=Homo sapiens GN=TMED2 PE=1 SV=1;>tr Q6FHT8 Q6FHT8            | 1.88E-39  |
| Q15365;Q53SS8         | PCBP1_HUMAN Poly(rC)-binding protein 1 OS=Homo sapiens GN=PCBP1 PE=1 SV=2;>tr Q53SS8 Q53SS8_HUMAN Poly(RC) binding p        | 1.46E-117 |
| Q15386;Q15386-2       | UBE3C_HUMAN Ubiquitin-protein ligase E3C OS=Homo sapiens GN=UBE3C PE=1 SV=3;>sp Q15386-2 UBE3C_HUMAN Isoform 2 of U         | 1.70E-32  |
| Q15386;Q15386-2;Q1538 | UBE3C_HUMAN Ubiquitin-protein ligase E3C OS=Homo sapiens GN=UBE3C PE=1 SV=3;>sp Q15386-2 UBE3C_HUMAN Isoform 2 of U         | 1.80E-33  |
| Q15417;Q6FHA7;B4DP09  | CNN3_HUMAN Calponin-3 OS=Homo sapiens GN=CNN3 PE=1 SV=1;>tr Q6FHA7 Q6FHA7_HUMAN CNN3 protein (Fragment) OS=Hom              | 0         |
| Q15424;Q14151         | SAFB1_HUMAN Scaffold attachment factor B1 OS=Homo sapiens GN=SAFB PE=1 SV=4;>sp Q14151 SAFB2_HUMAN Scaffold attachm         | 2.92E-44  |
| Q15435;Q15435-2;Q1543 | PP1R7_HUMAN Protein phosphatase 1 regulatory subunit 7 OS=Homo sapiens GN=PPP1R7 PE=1 SV=1;>sp Q15435-2 PP1R7_HUMAN         | 3.91E-123 |
| Q15436;B4DF60;B3KXI2  | SEC23A_HUMAN Protein transport protein Sec23A OS=Homo sapiens GN=SEC23A PE=1 SV=2;>tr B4DF60 B4DF60_HUMAN cDNA FLJ5         | 4.61E-61  |
| Q15459;B4E091         | SF3A1_HUMAN Splicing factor 3A subunit 1 OS=Homo sapiens GN=SF3A1 PE=1 SV=1;>tr B4E091 B4E091_HUMAN cDNA FLJ55438, I        | 2.01E-106 |
| Q15555;Q15555-2       | MARE2_HUMAN Microtubule-associated protein RP/EB family member 2 OS=Homo sapiens GN=MAPRE2 PE=1 SV=1;>sp Q15555-2 M         | 8.40E-08  |
| Q15628;B3KQZ9         | TRADD_HUMAN Tumor necrosis factor receptor type 1-associated DEATH domain protein OS=Homo sapiens GN=TRADD PE=1 SV=2;>      | 1.75E-09  |
| Q15631;B7Z5D9;B3KRM8  | TSN_HUMAN Translin OS=Homo sapiens GN=TSN PE=1 SV=1;>tr B7Z5D9 B7Z5D9_HUMAN cDNA FLJ59957, highly similar to Translin       | 5.41E-21  |
| Q15637;Q15637-2;Q1563 | SF01_HUMAN Splicing factor 1 OS=Homo sapiens GN=SF1 PE=1 SV=4;>sp Q15637-2 SF01_HUMAN Isoform 2 of Splicing factor 1 OS     | 8.21E-51  |
| Q15642;Q15642-3;Q1564 | CIP4_HUMAN Cdc42-interacting protein 4 OS=Homo sapiens GN=TRIP10 PE=1 SV=3;>sp Q15642-3 CIP4_HUMAN Isoform 3 of Cdc42       | 2.63E-60  |
| Q15648;Q15648-3       | MED1_HUMAN Mediator of RNA polymerase II transcription subunit 1 OS=Homo sapiens GN=MED1 PE=1 SV=4;>sp Q15648-3 MED1_       | 8.44E-12  |
| Q15651;Q15651-2       | HMG3_HUMAN High mobility group nucleosome-binding domain-containing protein 3 OS=Homo sapiens GN=HMG3 PE=1 SV=2;>sp         | 9.46E-10  |
| Q15654;Q68D94;Q71V88  | TRIP6_HUMAN Thyroid receptor-interacting protein 6 OS=Homo sapiens GN=TRIP6 PE=1 SV=3;>tr Q68D94 Q68D94_HUMAN Putativ       | 2.35E-13  |
| Q15758;Q71UA6;B7ZB81  | AAAT_HUMAN Neutral amino acid transporter B(0) OS=Homo sapiens GN=SLC1A5 PE=1 SV=2;>tr Q71UA6 Q71UA6_HUMAN Neutral          | 2.31E-161 |
| Q15785;B4DXU3         | TOM34_HUMAN Mitochondrial import receptor subunit TOM34 OS=Homo sapiens GN=TOMM34 PE=1 SV=2;>tr B4DXU3 B4DXU3_HUM           | 2.74E-185 |
| Q15796;Q53XR6;Q15796- | SMAD2_HUMAN Mothers against decapentaplegic homolog 2 OS=Homo sapiens GN=SMAD2 PE=1 SV=1;>tr Q53XR6 Q53XR6_HUMAN            | 5.55E-08  |
| Q15819;Q13404-1;Q1340 | UB2V2_HUMAN Ubiquitin-conjugating enzyme E2 variant 2 OS=Homo sapiens GN=UBE2V2 PE=1 SV=4;>sp Q13404-1 UB2V1_HUMA           | 4.81E-45  |
| Q15904;Q8NBT4;Q9H0C7  | VAS1_HUMAN V-type proton ATPase subunit S1 OS=Homo sapiens GN=ATP6AP1 PE=1 SV=2;>tr Q8NBT4 Q8NBT4_HUMAN cDNA FLJ5           | 8.26E-42  |
| Q15907;P62491         | RB11B_HUMAN Ras-related protein Rab-11B OS=Homo sapiens GN=RAB11B PE=1 SV=4;>sp P62491 RB11A_HUMAN Ras-related pro          | 3.22E-54  |
| Q15942;B4DY85;Q28617  | ZYX_HUMAN Zyxin OS=Homo sapiens GN=ZYX PE=1 SV=1;>tr B4DY85 B4DY85_HUMAN cDNA FLJ61463, highly similar to Zyxin OS=         | 2.54E-118 |
| Q16181;Q16181-2;A4GY  | SEPT7_HUMAN Septin-7 OS=Homo sapiens GN=SEPT7 PE=1 SV=2;>sp Q16181-2 SEPT7_HUMAN Isoform 2 of Septin-7 OS=Homo sa           | 3.04E-233 |
| Q16204;Q05CP8         | CCDC6_HUMAN Coiled-coil domain-containing protein 6 OS=Homo sapiens GN=CCDC6 PE=1 SV=2;>tr Q05CP8 Q05CP8_HUMAN CCD          | 8.03E-74  |
| Q16270;B4E1N2;B7Z9W7  | IBP7_HUMAN Insulin-like growth factor-binding protein 7 OS=Homo sapiens GN=IGFBP7 PE=1 SV=1;>tr B4E1N2 B4E1N2_HUMAN cD      | 4.91E-32  |
| Q16352;Q59EM6;B4DE66  | AINX_HUMAN Alpha-internexin OS=Homo sapiens GN=INA PE=1 SV=2;>tr Q59EM6 Q59EM6_HUMAN Internexin neuronal intermedia         | 3.92E-15  |
| Q16363;Q16363-2;E1P55 | LAMA4_HUMAN Laminin subunit alpha-4 OS=Homo sapiens GN=LAMA4 PE=1 SV=4;>sp Q16363-2 LAMA4_HUMAN Isoform 2 of Lami           | 1.86E-63  |
| Q16394;D7RTA7         | EXT1_HUMAN Exostosin-1 OS=Homo sapiens GN=EXT1 PE=1 SV=2;>tr D7RTA7 D7RTA7_HUMAN Multiple exostosins 1 (Fragment) OS        | 2.25E-06  |
| Q16512-2;Q16512;Q1552 | PKN1_HUMAN Isoform 2 of Serine/threonine-protein kinase N1 OS=Homo sapiens GN=PKN1;>sp Q16512 PKN1_HUMAN Serine/thr         | 2.79E-11  |
| Q16531;B7Z2A1;B4DSA8  | DDB1_HUMAN DNA damage-binding protein 1 OS=Homo sapiens GN=DDB1 PE=1 SV=1;>tr B7Z2A1 B7Z2A1_HUMAN cDNA FLJ56068             | 2.08E-24  |
| Q16539;Q16539-2;Q1653 | MK14_HUMAN Mitogen-activated protein kinase 14 OS=Homo sapiens GN=MAPK14 PE=1 SV=3;>sp Q16539-2 MK14_HUMAN Isoform          | 8.48E-36  |
| Q16543;Q6FG59         | CDC37_HUMAN Hsp90 co-chaperone Cdc37 OS=Homo sapiens GN=CDC37 PE=1 SV=1;>tr Q6FG59 Q6FG59_HUMAN CDC37 protein (             | 2.62E-182 |
| Q16576;Q6FHQ0;Q5JP00  | RBBP7_HUMAN Histone-binding protein RBBP7 OS=Homo sapiens GN=RBBP7 PE=1 SV=1;>tr Q6FHQ0 Q6FHQ0_HUMAN RBBP7 prote            | 5.07E-202 |
| Q16595;Q16595-2       | FRDA_HUMAN Frataxin, mitochondrial OS=Homo sapiens GN=FXN PE=1 SV=2;>sp Q16595-2 FRDA_HUMAN Isoform 2 of Frataxin, m        | 3.58E-06  |
| Q16610-4;Q16610;Q1661 | 4 ECM1_HUMAN Isoform 4 of Extracellular matrix protein 1 OS=Homo sapiens GN=ECM1;>sp Q16610 ECM1_HUMAN Extracellular ma     | 1.20E-09  |
| Q16629;Q564D3;C9JAB2  | SRSF7_HUMAN Serine/arginine-rich splicing factor 7 OS=Homo sapiens GN=SRSF7 PE=1 SV=1;>tr Q564D3 Q564D3_HUMAN Aging-a       | 2.31E-22  |
| Q16630-2;Q16630;Q1663 | 2 CPSF6_HUMAN Isoform 2 of Cleavage and polyadenylation specificity factor subunit 6 OS=Homo sapiens GN=CPSF6;>sp Q16630 CI | 4.77E-228 |
| Q16666;Q16666-2;Q1666 | IF16_HUMAN Gamma-interferon-inducible protein 16 OS=Homo sapiens GN=IFI16 PE=1 SV=3;>sp Q16666-2 IF16_HUMAN Isoform         | 0         |
| Q16698;B7Z6B8         | DECR1_HUMAN 2,4-dienoyl-CoA reductase, mitochondrial OS=Homo sapiens GN=DECR1 PE=1 SV=1;>tr B7Z6B8 B7Z6B8_HUMAN cDN         | 8.55E-83  |
| Q16718;Q5H9R2;C9IZN5  | NDUA5_HUMAN NADH dehydrogenase [ubiquinone] 1 alpha subcomplex subunit 5 OS=Homo sapiens GN=NDUFA5 PE=1 SV=3;>tr Q5         | 3.36E-85  |
| Q16762;Q53EW8;B4DVZ4  | THTR_HUMAN Thiosulfate sulfurtransferase OS=Homo sapiens GN=TST PE=1 SV=4;>tr Q53EW8 Q53EW8_HUMAN Thiosulfate sulfurtr      | 1.45E-24  |
| Q16763;Q2QD04;Q6NXQ4  | UBE2S_HUMAN Ubiquitin-conjugating enzyme E2 S OS=Homo sapiens GN=UBE2S PE=1 SV=2;>tr Q2QD04 Q2QD04_HUMAN Ubiquiti           | 1.90E-18  |
| Q16775;Q16775-2       | GLO2_HUMAN Hydroxyacylglutathione hydrolase, mitochondrial OS=Homo sapiens GN=HAGH PE=1 SV=2;>sp Q16775-2 GLO2_HUM          | 5.81E-18  |
| Q16795;Q9BTT5;A8K4V2  | NDUA9_HUMAN NADH dehydrogenase [ubiquinone] 1 alpha subcomplex subunit 9, mitochondrial OS=Homo sapiens GN=NDUFA9 PE=       | 1.94E-26  |
| Q16822;Q61B91;B4DW73  | PCKGM_HUMAN Phosphoenolpyruvate carboxykinase [GTP], mitochondrial OS=Homo sapiens GN=PCK2 PE=1 SV=3;>tr Q61B91 Q6IB        | 3.04E-165 |
| Q16836-2;Q16836       | 2 HCDH_HUMAN Isoform 2 of Hydroxyacyl-coenzyme A dehydrogenase, mitochondrial OS=Homo sapiens GN=HADH;>sp Q16836 HCI        | 1.49E-213 |
| Q16850;Q16850-2       | CP51A_HUMAN Lanosterol 14-alpha demethylase OS=Homo sapiens GN=CYP51A1 PE=1 SV=3;>sp Q16850-2 CP51A_HUMAN Isoform           | 1.73E-38  |
| Q16881;Q16881-3;Q1688 | TRXR1_HUMAN Thioredoxin reductase 1, cytoplasmic OS=Homo sapiens GN=TXNRD1 PE=1 SV=3;>sp Q16881-3 TRXR1_HUMAN Isof          | 1.91E-221 |
| Q16881;Q16881-6;Q1688 | TRXR1_HUMAN Thioredoxin reductase 1, cytoplasmic OS=Homo sapiens GN=TXNRD1 PE=1 SV=3;>sp Q16881-6 TRXR1_HUMAN Isof          | 1.50E-106 |
| Q27J81;Q27J81-2;A8MSL | INF2_HUMAN Inverted formin-2 OS=Homo sapiens GN=INF2 PE=1 SV=2;>sp Q27J81-2 INF2_HUMAN Isoform 2 of Inverted formin-2       | 5.95E-20  |
| Q29963;Q29865         | 1C06_HUMAN HLA class I histocompatibility antigen, Cw-6 alpha chain OS=Homo sapiens GN=HLA-C PE=1 SV=2;>sp Q29865 1C18_     | 0         |
| Q29RF7;Q96DB6;B3KMN2  | PDS5A_HUMAN Sister chromatid cohesion protein PDS5 homolog A OS=Homo sapiens GN=PDS5A PE=1 SV=1;>tr Q96DB6 Q96DB6_I         | 2.79E-63  |
| Q2LD37;Q2LD37-4;Q2LD3 | K1109_HUMAN Uncharacterized protein KIAA1109 OS=Homo sapiens GN=KIAA1109 PE=1 SV=2;>sp Q2LD37-4 K1109_HUMAN Isofo           | 9.12E-10  |



|                                      |                                                                                                                                |           |
|--------------------------------------|--------------------------------------------------------------------------------------------------------------------------------|-----------|
| Q2M2I8;Q2M2I8-2                      | AAK1_HUMAN AP2-associated protein kinase 1 OS=Homo sapiens GN=AAK1 PE=1 SV=3;>sp Q2M2I8-2 AAK1_HUMAN Isoform 2 of A            | 2.93E-08  |
| Q2TAA2;Q05D21;Q6PCA9;IAH1_HUMAN      | Isoamyl acetate-hydrolyzing esterase 1 homolog OS=Homo sapiens GN=IAH1 PE=1 SV=1;>tr Q05D21 Q05D21_HUMAN                       | 5.33E-06  |
| Q32P28;Q32P28-3;B4DNM P3H1_HUMAN     | Prolyl 3-hydroxylase 1 OS=Homo sapiens GN=LEPRE1 PE=1 SV=2;>sp Q32P28-3 P3H1_HUMAN Isoform 3 of Prolyl 3-h                     | 5.97E-156 |
| Q3KQU3;Q3KQU3-4;Q3KQ MA7D1_HUMAN     | MAP7 domain-containing protein 1 OS=Homo sapiens GN=MAP7D1 PE=1 SV=1;>sp Q3KQU3-4 MA7D1_HUMAN Isofo                            | 1.66E-16  |
| Q3KQV9;Q3KQV9-2                      | UAP1L_HUMAN UDP-N-acetylhexosamine pyrophosphorylase-like protein 1 OS=Homo sapiens GN=UAP1L1 PE=2 SV=2;>sp Q3KQV9-2           | 2.57E-08  |
| Q3LXA3;Q2L9C1;Q9UFX5 DHAK_HUMAN      | Bifunctional ATP-dependent dihydroxyacetone kinase/FAD-AMP lyase (cyclizing) OS=Homo sapiens GN=DAK PE=1 SV=                   | 1.27E-289 |
| Q3MHD2-2;Q3MHD2;B4DL2 LSM12_HUMAN    | Isoform 2 of Protein LSM12 homolog OS=Homo sapiens GN=LSM12;>sp Q3MHD2 LSM12_HUMAN Protein LSM12 hc                            | 1.01E-34  |
| Q3V6T2;Q3V6T2-3;Q3V6T GRDN_HUMAN     | Girdin OS=Homo sapiens GN=CCDC88A PE=1 SV=2;>sp Q3V6T2-3 GRDN_HUMAN Isoform 3 of Girdin OS=Homo sapi                           | 1.62E-06  |
| Q3ZCM7;Q5SQY0;C9JAA5;TBB8_HUMAN      | Tubulin beta-8 chain OS=Homo sapiens GN=TUBB8 PE=1 SV=2;>tr Q5SQY0 Q5SQY0_HUMAN Novel protein similar to l                     | 8.16E-162 |
| Q3ZCM7;Q99867                        | TBB8_HUMAN Tubulin beta-8 chain OS=Homo sapiens GN=TUBB8 PE=1 SV=2;>sp Q99867 TBB4Q_HUMAN Putative tubulin beta-4q c           | 4.61E-282 |
| Q4G0J3;D6RFF0                        | LARP7_HUMAN La-related protein 7 OS=Homo sapiens GN=LARP7 PE=1 SV=1;>tr D6RFF0 D6RFF0_HUMAN Uncharacterized protein (          | 1.58E-18  |
| Q4V328;Q4V328-4;Q4V32 GRAP1_HUMAN    | GRIP1-associated protein 1 OS=Homo sapiens GN=GRIPAP1 PE=1 SV=1;>sp Q4V328-4 GRAP1_HUMAN Isoform 4 of                          | 1.90E-09  |
| Q4VC31;C9JQ41                        | CCD58_HUMAN Coiled-coil domain-containing protein 58 OS=Homo sapiens GN=CCDC58 PE=1 SV=1;>tr C9JQ41 C9JQ41_HUMAN Ur            | 5.04E-66  |
| Q53FV1;Q9P0S3                        | ORML2_HUMAN ORM1-like protein 2 OS=Homo sapiens GN=ORMDL2 PE=2 SV=2;>sp Q9P0S3 ORML1_HUMAN ORM1-like protein 1 O               | 7.68E-09  |
| Q567U6;A8MQC0                        | CCD93_HUMAN Coiled-coil domain-containing protein 93 OS=Homo sapiens GN=CCDC93 PE=1 SV=2;>tr A8MQC0 A8MQC0_HUMAN (             | 4.27E-13  |
| Q5EBL8-2;Q5EBL8                      | PDZ11_HUMAN Isoform 2 of PDZ domain-containing protein 11 OS=Homo sapiens GN=PDZD11;>sp Q5EBL8 PDZ11_HUMAN PDZ d               | 5.91E-37  |
| Q5HYI8;C9JXM3                        | RABL3_HUMAN Rab-like protein 3 OS=Homo sapiens GN=RABL3 PE=1 SV=1;>tr C9JXM3 C9JXM3_HUMAN Uncharacterized protein OS           | 1.65E-06  |
| Q5JPE7;Q15155;P69849;NOMO2_HUMAN     | Nodal modulator 2 OS=Homo sapiens GN=NOMO2 PE=1 SV=1;>sp Q15155 NOMO1_HUMAN Nodal modulator 1 OS=                              | 2.91E-28  |
| Q5JRA6;Q5JRA6-2;Q5JRA6               | MIA3_HUMAN Melanoma inhibitory activity protein 3 OS=Homo sapiens GN=MIA3 PE=1 SV=1;>sp Q5JRA6-2 MIA3_HUMAN Isoform 2          | 2.59E-15  |
| Q5JSH3;Q5JSH3-2;Q5JSH WDR44_HUMAN    | WD repeat-containing protein 44 OS=Homo sapiens GN=WDR44 PE=1 SV=1;>sp Q5JSH3-2 WDR44_HUMAN Isoform                            | 2.24E-09  |
| Q5JVF3-4;Q5JVF3;Q5JVF3 4 PCID2_HUMAN | Isoform 4 of PCI domain-containing protein 2 OS=Homo sapiens GN=PCID2;>sp Q5JVF3 PCID2_HUMAN PCI domair                        | 2.11E-07  |
| Q5JVF3-4;Q5JVF3;Q5JVF3 4 PCID2_HUMAN | Isoform 4 of PCI domain-containing protein 2 OS=Homo sapiens GN=PCID2;>sp Q5JVF3 PCID2_HUMAN PCI domair                        | 5.95E-17  |
| Q5M775;Q5M775-4;Q5M7                 | CYTSB_HUMAN Cytospin-B OS=Homo sapiens GN=SPECC1 PE=1 SV=1;>sp Q5M775-4 CYTSB_HUMAN Isoform 4 of Cytospin-B OS=H               | 1.92E-07  |
| Q5R3I4;A9UJP8;B4DUE0                 | TTC38_HUMAN Tetratricopeptide repeat protein 38 OS=Homo sapiens GN=TTC38 PE=1 SV=1;>tr A9UJP8 A9UJP8_HUMAN Novel prote         | 1.12E-40  |
| Q5RI15-2;Q5RI15                      | 2 FA36A_HUMAN Isoform 2 of Protein FAM36A OS=Homo sapiens GN=FAM36A;>sp Q5RI15 FA36A_HUMAN Protein FAM36A OS=Homo              | 2.20E-15  |
| Q5SRD1;O14925;B4DI18;TI23B_HUMAN     | Putative mitochondrial import inner membrane translocase subunit Tim23B OS=Homo sapiens GN=TIMM23B PE=5 SV=                    | 7.36E-24  |
| Q5SRE7-3;Q5SRE7;Q5SRE 3 PHYD1_HUMAN  | Isoform 3 of Phytanoyl-CoA dioxygenase domain-containing protein 1 OS=Homo sapiens GN=PHYHD1;>sp Q5SRE7                        | 4.00E-10  |
| Q5SW79;Q5SW79-3;Q5SVC                | CE170_HUMAN Centrosomal protein of 170 kDa OS=Homo sapiens GN=CEP170 PE=1 SV=1;>sp Q5SW79-3 CE170_HUMAN Isoform 3              | 3.00E-52  |
| Q5T1J5;Q9Y6H1                        | CHCH9_HUMAN Putative coiled-coil-helix-coiled-coil-helix domain-containing protein CHCHD2P9, mitochondrial OS=Homo sapiens GN= | 9.78E-53  |
| Q5T280;Q9P041                        | CI114_HUMAN Uncharacterized protein C9orf114 OS=Homo sapiens GN=C9orf114 PE=1 SV=3;>tr Q9P041 Q9P041_HUMAN HSPC109             | 1.91E-07  |
| Q5T653;C9IY40                        | RM02_HUMAN 39S ribosomal protein L2, mitochondrial OS=Homo sapiens GN=MRPL2 PE=1 SV=2;>tr C9IY40 C9IY40_HUMAN Uncha            | 5.06E-22  |
| Q5T6F2;B4DH66;B4DRB6;UBAP2_HUMAN     | Ubiquitin-associated protein 2 OS=Homo sapiens GN=UBAP2 PE=1 SV=1;>tr B4DH66 B4DH66_HUMAN cDNA FLJ595(                         | 1.33E-19  |
| Q5T6V5;Q5T6V7                        | CI064_HUMAN UPF0553 protein C9orf64 OS=Homo sapiens GN=C9orf64 PE=1 SV=1;>tr Q5T6V7 Q5T6V7_HUMAN Chromosome 9 op               | 5.13E-33  |
| Q5T8D3;Q5T8D3-3;Q5T8E                | ACBD5_HUMAN Acyl-CoA-binding domain-containing protein 5 OS=Homo sapiens GN=ACBD5 PE=1 SV=1;>sp Q5T8D3-3 ACBD5_HU              | 2.68E-06  |
| Q5TFE4;A8K2Z3;Q5QPD0;NT5D1_HUMAN     | 5-nucleotidase domain-containing protein 1 OS=Homo sapiens GN=NT5DC1 PE=1 SV=1;>tr A8K2Z3 A8K2Z3_HUMAN                         | 5.95E-39  |
| Q5VT52;Q5VT52-3;Q5VT5                | RPRD2_HUMAN Regulation of nuclear pre-mRNA domain-containing protein 2 OS=Homo sapiens GN=RPRD2 PE=1 SV=1;>sp Q5VT52           | 2.35E-10  |
| Q5VT79;Q5VT79-2                      | AXA82_HUMAN Annexin A8-like protein 2 OS=Homo sapiens GN=ANXA8L2 PE=2 SV=1;>sp Q5VT79-2 AXA82_HUMAN Isoform 2 of A             | 0         |
| Q5VTR2;Q05DC0;A0PJ6                  | BRE1A_HUMAN E3 ubiquitin-protein ligase BRE1A OS=Homo sapiens GN=RNF20 PE=1 SV=2;>tr Q05DC0 Q05DC0_HUMAN RNF20 prc             | 3.67E-08  |
| Q5VW32;B7Z9G5;B7Z1V1                 | BROX_HUMAN BRO1 domain-containing protein BROX OS=Homo sapiens GN=BROX PE=1 SV=1;>tr B7Z9G5 B7Z9G5_HUMAN C1orf5                | 5.13E-130 |
| Q5VYK3;B3KXF2                        | ECM29_HUMAN Proteasome-associated protein ECM29 homolog OS=Homo sapiens GN=ECM29 PE=1 SV=2;>tr B3KXF2 B3KXF2_HUM               | 2.95E-81  |
| Q5Y7A7;P01912                        | 2B1D_HUMAN HLA class II histocompatibility antigen, DRB1-13 beta chain OS=Homo sapiens GN=HLA-DRB1 PE=1 SV=1;>sp P01912        | 8.73E-55  |
| Q63HR2-4;Q63HR2;Q63HI4 TENC1_HUMAN   | Isoform 4 of Tensin-like C1 domain-containing phosphatase OS=Homo sapiens GN=TENC1;>sp Q63HR2 TENC1_HU                         | 1.07E-06  |
| Q641Q2;Q641Q2-2;Q9Y4E                | FA21A_HUMAN WASH complex subunit FAM21A OS=Homo sapiens GN=FAM21A PE=1 SV=3;>sp Q641Q2-2 FA21A_HUMAN Isoform 2                 | 2.99E-50  |
| Q66LE6;A8KAK0                        | 2ABD_HUMAN Serine/threonine-protein phosphatase 2A 55 kDa regulatory subunit B delta isoform OS=Homo sapiens GN=PPP2R2D PI     | 3.53E-26  |
| Q66PJ3-2;Q8TEM4;Q66PJ:2 AR6P4_HUMAN  | Isoform 2 of ADP-ribosylation factor-like protein 6-interacting protein 4 OS=Homo sapiens GN=ARL6IP4;>tr Q8TEM4                | 3.69E-21  |
| Q68CZ2;Q63HR2-5;Q68C: TENS3_HUMAN    | Tensin-3 OS=Homo sapiens GN=TNS3 PE=1 SV=2;>sp Q63HR2-5 TENC1_HUMAN Isoform 5 of Tensin-like C1 domain                         | 5.16E-22  |
| Q68CZ2;Q68CZ2-2                      | TENS3_HUMAN Tensin-3 OS=Homo sapiens GN=TNS3 PE=1 SV=2;>sp Q68CZ2-2 TENS3_HUMAN Isoform 2 of Tensin-3 OS=Homo sa               | 7.57E-21  |
| Q68EM7;Q68EM7-5;Q68E                 | RHG17_HUMAN Rho GTPase-activating protein 17 OS=Homo sapiens GN=ARHGAP17 PE=1 SV=1;>sp Q68EM7-5 RHG17_HUMAN Isot               | 4.25E-54  |
| Q6AI08;Q0VD96                        | HEAT6_HUMAN HEAT repeat-containing protein 6 OS=Homo sapiens GN=HEATR6 PE=1 SV=1;>tr Q0VD96 Q0VD96_HUMAN HEATR6 p              | 4.60E-42  |
| Q6DD88;B4DXC4;C9JU1                  | ATLA3_HUMAN Atlastin-3 OS=Homo sapiens GN=ATL3 PE=1 SV=1;>tr B4DXC4 B4DXC4_HUMAN cDNA FLJ58636, moderately similar             | 0         |
| Q6DK11;B7Z652;B7Z4G0;RL7L_HUMAN      | 60S ribosomal protein L7-like 1 OS=Homo sapiens GN=RPL7L1 PE=1 SV=1;>tr B7Z652 B7Z652_HUMAN cDNA FLJ5085                       | 1.52E-09  |
| Q6DKK2;B4DN65;A8MZ52                 | TTC19_HUMAN Tetratricopeptide repeat protein 19 OS=Homo sapiens GN=TTC19 PE=1 SV=3;>tr B4DN65 B4DN65_HUMAN Tetratrico          | 3.99E-10  |
| Q6DN03;Q6DRA6                        | H2B2C_HUMAN Putative histone H2B type 2-C OS=Homo sapiens GN=HIST2H2BC PE=5 SV=3;>sp Q6DRA6 H2B2D_HUMAN Putative               | 1.57E-68  |
| Q6FHJ7;B4E1T4                        | SFRP4_HUMAN Secreted frizzled-related protein 4 OS=Homo sapiens GN=SFRP4 PE=1 SV=2;>tr B4E1T4 B4E1T4_HUMAN cDNA FLJ5:          | 2.35E-16  |
| Q6FI13;Q16777;P0C0S8;F               | H2A2A_HUMAN Histone H2A type 2-A OS=Homo sapiens GN=HIST2H2AA3 PE=1 SV=3;>sp Q16777 H2A2C_HUMAN Histone H2A type               | 3.56E-249 |
| Q6IBS0;D6RG15                        | TWF2_HUMAN Twinfilin-2 OS=Homo sapiens GN=TWF2 PE=1 SV=2;>tr D6RG15 D6RG15_HUMAN Uncharacterized protein OS=Homo               | 5.72E-78  |
| Q6IN85;Q6IN85-2;Q6IN8: P4R3A_HUMAN   | Serine/threonine-protein phosphatase 4 regulatory subunit 3A OS=Homo sapiens GN=SMEK1 PE=1 SV=1;>sp Q6IN85                     | 2.16E-08  |
| Q6NXE6;Q6NXE6-2;B4E1F                | ARMC6_HUMAN Armadillo repeat-containing protein 6 OS=Homo sapiens GN=ARMC6 PE=1 SV=2;>sp Q6NXE6-2 ARMC6_HUMAN Isot             | 3.33E-92  |
| Q6NZ67;Q6P582                        | MZT2B_HUMAN Mitotic-spindle organizing protein 2B OS=Homo sapiens GN=MZT2B PE=1 SV=1;>sp Q6P582 MZT2A_HUMAN Mitotic-           | 9.48E-05  |
| Q6NZI2;Q6NZI2-2                      | PTRF_HUMAN Polymerase I and transcript release factor OS=Homo sapiens GN=PTRF PE=1 SV=1;>sp Q6NZI2-2 PTRF_HUMAN Isofor         | 0         |
| Q6NZI2;Q6NZI2-2;Q6NZI: PTRF_HUMAN    | Polymerase I and transcript release factor OS=Homo sapiens GN=PTRF PE=1 SV=1;>sp Q6NZI2-2 PTRF_HUMAN Isofor                    | 0         |

Q6P179;Q6P179-3;Q6P179 ERAP2\_HUMAN Endoplasmic reticulum aminopeptidase 2 OS=Homo sapiens GN=ERAP2 PE=1 SV=2;>sp|Q6P179-3|ERAP2\_HUMAN Isoform 1 1.47E-23  
 Q6P1J9;B4DV47 CDC73\_HUMAN Parafibromin OS=Homo sapiens GN=CDC73 PE=1 SV=1;>tr|B4DV47|B4DV47\_HUMAN cDNA FLJ57893, highly similar 6.08E-30  
 Q6P1N0;Q6P1N0-2;Q6P1N0 C2D1A\_HUMAN Coiled-coil and C2 domain-containing protein 1A OS=Homo sapiens GN=CC2D1A PE=1 SV=1;>sp|Q6P1N0-2|C2D1A\_HUMAN Isoform 1 1.06E-05  
 Q6P1Q9;Q6P1Q9-2;B4DS MTL2B\_HUMAN Methyltransferase-like protein 2B OS=Homo sapiens GN=METTL2B PE=1 SV=3;>sp|Q6P1Q9-2|MTL2B\_HUMAN Isoform 1 5.40E-09  
 Q6P3X3;B4DRC7 TTC27\_HUMAN Tetratricopeptide repeat protein 27 OS=Homo sapiens GN=TTC27 PE=1 SV=1;>tr|B4DRC7|B4DRC7\_HUMAN cDNA FLJ57893, highly similar 7.61E-35  
 Q6P6C2;Q6P6C2-2 ALKB5\_HUMAN Probable alpha-ketoglutarate-dependent dioxygenase ABH5 OS=Homo sapiens GN=ALKBH5 PE=1 SV=1;>sp|Q6P6C2-2|ALKB5\_HUMAN Isoform 1 1.82E-40  
 Q6P996;B4DR55;B4DHL7;PDXD1\_HUMAN Pyridoxal-dependent decarboxylase domain-containing protein 1 OS=Homo sapiens GN=PDXDC1 PE=1 SV=2;>tr|B4DR55|PDXD1\_HUMAN Isoform 1 1.96E-248  
 Q6S8J3;P0CG38;P0CG39;POTEE\_HUMAN POTE ankyrin domain family member E OS=Homo sapiens GN=POTEE PE=1 SV=3;>sp|P0CG38|POTEE\_HUMAN POTE ankyrin domain family member E 0  
 Q6S8J3;Q9BYX7;P0CG38 POTEE\_HUMAN POTE ankyrin domain family member E OS=Homo sapiens GN=POTEE PE=1 SV=3;>sp|Q9BYX7|ACTBM\_HUMAN Putative ankyrin domain family member E 1.73E-127  
 Q6UN15;Q6UN15-3;Q6UN15 FIP1\_HUMAN Pre-mRNA 3-end-processing factor FIP1 OS=Homo sapiens GN=FIP1L1 PE=1 SV=1;>sp|Q6UN15-3|FIP1\_HUMAN Isoform 1 1.32E-49  
 Q6UWP2;Q6UWP2-2;A8M DHR11\_HUMAN Dehydrogenase/reductase SDR family member 11 OS=Homo sapiens GN=DHRS11 PE=1 SV=1;>sp|Q6UWP2-2|DHR11\_HUMAN Isoform 1 9.14E-13  
 Q6UWZ7;D6REL5;D6RAN3 F175A\_HUMAN BRCA1-A complex subunit Abraxas OS=Homo sapiens GN=FAM175A PE=1 SV=2;>tr|D6REL5|D6REL5\_HUMAN Uncharacterized protein 1 1.15E-07  
 Q6UX04;Q6UX04-2;D6RE CWC27\_HUMAN Peptidyl-prolyl cis-trans isomerase CWC27 homolog OS=Homo sapiens GN=CWC27 PE=1 SV=1;>sp|Q6UX04-2|CWC27\_HUMAN Isoform 1 2.05E-30  
 Q6UX71;Q6UX71-2 PXDC2\_HUMAN Plexin domain-containing protein 2 OS=Homo sapiens GN=PLXDC2 PE=1 SV=1;>sp|Q6UX71-2|PXDC2\_HUMAN Isoform 1 1.79E-07  
 Q6UXG2;Q6UXG2-4;Q6UXG2 K1324\_HUMAN UPF0577 protein KIAA1324 OS=Homo sapiens GN=KIAA1324 PE=2 SV=2;>sp|Q6UXG2-4|K1324\_HUMAN Isoform 4 of KIAA1324 protein 3.05E-37  
 Q6VY07-2;Q6VY07;B4DF7 2|PACS1\_HUMAN Isoform 2 of Phosphofurin acidic cluster sorting protein 1 OS=Homo sapiens GN=PACS1;>sp|Q6VY07|PACS1\_HUMAN Isoform 2 3.71E-11  
 Q6WCQ1-2;Q6WCQ1;Q6W2|MPRIIP\_HUMAN Isoform 2 of Myosin phosphatase Rho-interacting protein OS=Homo sapiens GN=MPRIIP;>sp|Q6WCQ1|MPRIIP\_HUMAN Isoform 2 9.01E-21  
 Q6WKZ4;Q6WKZ4-3;Q6W RFIIP1\_HUMAN Rab11 family-interacting protein 1 OS=Homo sapiens GN=RAB11FIP1 PE=1 SV=2;>sp|Q6WKZ4-3|RFIIP1\_HUMAN Isoform 1 1.73E-34  
 Q6XQN6;Q6XQN6-3;Q8W PNCB\_HUMAN Nicotinate phosphoribosyltransferase OS=Homo sapiens GN=NAPRT1 PE=1 SV=2;>sp|Q6XQN6-3|PNCB\_HUMAN Isoform 1 3.53E-27  
 Q6Y7W6-3;Q6Y7W6 3|PERQ2\_HUMAN Isoform 2 of PERQ amino acid-rich with GYF domain-containing protein 2 OS=Homo sapiens GN=GIGYF2;>sp|Q6Y7W6-3|PERQ2\_HUMAN Isoform 2 5.61E-34  
 Q6YN16;Q6YN16-2 HSDL2\_HUMAN Hydroxysteroid dehydrogenase-like protein 2 OS=Homo sapiens GN=HSDL2 PE=1 SV=1;>sp|Q6YN16-2|HSDL2\_HUMAN Isoform 1 1.50E-20  
 Q6YP21;Q6YP21-2 KAT3\_HUMAN Kynurenine--oxoglutarate transaminase 3 OS=Homo sapiens GN=CCBL2 PE=1 SV=1;>sp|Q6YP21-2|KAT3\_HUMAN Isoform 1 8.50E-11  
 Q6ZMI0;Q6ZMI0-2;Q6ZMI KLRAQ\_HUMAN KLRAQ motif-containing protein 1 OS=Homo sapiens GN=KLRAQ1 PE=1 SV=1;>sp|Q6ZMI0-2|KLRAQ\_HUMAN Isoform 1 1.43E-05  
 Q6ZRP7;B3KY64;Q5TB38 QSOX2\_HUMAN Sulfhydryl oxidase 2 OS=Homo sapiens GN=QSOX2 PE=1 SV=3;>tr|B3KY64|B3KY64\_HUMAN cDNA FLJ44717, highly similar 1.98E-31  
 Q6ZSZ5;Q6ZSZ5-3;Q6ZS ARHGI\_HUMAN Rho guanine nucleotide exchange factor 18 OS=Homo sapiens GN=ARHGEF18 PE=1 SV=3;>sp|Q6ZSZ5-3|ARHGI\_HUMAN Isoform 1 5.85E-15  
 Q70E73;Q70E73-3;Q70E7 RAPH1\_HUMAN Ras-associated and pleckstrin homology domains-containing protein 1 OS=Homo sapiens GN=RAPH1 PE=1 SV=3;>sp|Q70E73-3|RAPH1\_HUMAN Isoform 1 8.24E-131  
 Q70J99-3;Q70J99;B4DTQ 3|UN13D\_HUMAN Isoform 3 of Protein unc-13 homolog D OS=Homo sapiens GN=UNC13D;>sp|Q70J99|UN13D\_HUMAN Protein unc-13 homolog D 6.01E-07  
 Q70UQ0;Q70UQ0-2 IKIP\_HUMAN Inhibitor of nuclear factor kappa-B kinase-interacting protein OS=Homo sapiens GN=IKBIP PE=1 SV=1;>sp|Q70UQ0-2|IKIP\_HUMAN Isoform 1 1.50E-112  
 Q71U36;B4DQK4;Q9UQM TBA1A\_HUMAN Tubulin alpha-1A chain OS=Homo sapiens GN=TUBA1A PE=1 SV=1;>tr|B4DQK4|B4DQK4\_HUMAN cDNA FLJ53743, highly similar 0  
 Q71U36;Q13748;Q13748 TBA1A\_HUMAN Tubulin alpha-1A chain OS=Homo sapiens GN=TUBA1A PE=1 SV=1;>sp|Q13748|TBA1A\_HUMAN Tubulin alpha-1A chain 0  
 Q71U36;Q13748;Q6PEY2;TBA1A\_HUMAN Tubulin alpha-1A chain OS=Homo sapiens GN=TUBA1A PE=1 SV=1;>sp|Q13748|TBA1A\_HUMAN Tubulin alpha-1A chain 0  
 Q7L0Y3;C9JVB6 MRRP1\_HUMAN Mitochondrial ribonuclease P protein 1 OS=Homo sapiens GN=RG9MTD1 PE=1 SV=2;>tr|C9JVB6|C9JVB6\_HUMAN Uncharacterized protein 1 9.26E-42  
 Q7L273;B4DPW0 KCTD9\_HUMAN BTB/POZ domain-containing protein KCTD9 OS=Homo sapiens GN=KCTD9 PE=2 SV=1;>tr|B4DPW0|B4DPW0\_HUMAN Isoform 1 8.02E-10  
 Q7L2E3-2;Q7L2E3;Q7L2E 2|DHX30\_HUMAN Isoform 2 of Putative ATP-dependent RNA helicase DHX30 OS=Homo sapiens GN=DHX30;>sp|Q7L2E3|DHX30\_HUMAN Isoform 2 2.02E-26  
 Q7L2H7;B4E2Q4 EIF3M\_HUMAN Eukaryotic translation initiation factor 3 subunit M OS=Homo sapiens GN=EIF3M PE=1 SV=1;>tr|B4E2Q4|B4E2Q4\_HUMAN Isoform 1 2.02E-214  
 Q7L5D6;Q7L5D6-2;C9JHN GET4\_HUMAN Golgi to ER traffic protein 4 homolog OS=Homo sapiens GN=GET4 PE=1 SV=1;>sp|Q7L5D6-2|GET4\_HUMAN Isoform 2 2.21E-25  
 Q7L5N1;B2R514 CSN6\_HUMAN COP9 signalosome complex subunit 6 OS=Homo sapiens GN=COPS6 PE=1 SV=1;>tr|B2R514|B2R514\_HUMAN cDNA, F01283 2.61E-31  
 Q7LBR1;B2RA72 CHM1B\_HUMAN Charged multivesicular body protein 1b OS=Homo sapiens GN=CHMP1B PE=1 SV=1;>tr|B2RA72|B2RA72\_HUMAN cDNA, F01283 1.54E-06  
 Q7LG56;Q7LG56-5 RIR2B\_HUMAN Ribonucleoside-diphosphate reductase subunit M2 B OS=Homo sapiens GN=RRM2B PE=1 SV=1;>sp|Q7LG56-5|RIR2B\_HUMAN Isoform 1 1.36E-10  
 Q7RTV5;Q5JU03;B7ZKK1 CI021\_HUMAN UPF0308 protein C9orf21 OS=Homo sapiens GN=C9orf21 PE=2 SV=1;>tr|Q5JU03|Q5JU03\_HUMAN Novel protein (Fragile X mental retardation 1) 5.43E-05  
 Q7Z2W4;Q7Z2W4-2;Q7Z2 ZCCHV\_HUMAN Zinc finger CCCH-type antiviral protein 1 OS=Homo sapiens GN=ZC3HAV1 PE=1 SV=3;>sp|Q7Z2W4-2|ZCCHV\_HUMAN Isoform 1 2.09E-22  
 Q7Z3E5;Q7Z3E5-2 ARMC9\_HUMAN LisH domain-containing protein ARMC9 OS=Homo sapiens GN=ARMC9 PE=2 SV=2;>sp|Q7Z3E5-2|ARMC9\_HUMAN Isoform 1 7.20E-28  
 Q7Z460;Q7Z460-3;Q7Z46 CLAP1\_HUMAN CLIP-associating protein 1 OS=Homo sapiens GN=CLASP1 PE=1 SV=1;>sp|Q7Z460-3|CLAP1\_HUMAN Isoform 3 of CLIP-associating protein 1 1.76E-11  
 Q7Z4G1-2;Q7Z4G1;B0QZ 2|COMD6\_HUMAN Isoform 2 of COMM domain-containing protein 6 OS=Homo sapiens GN=COMM6;>sp|Q7Z4G1|COMD6\_HUMAN Isoform 2 1.04E-08  
 Q7Z4H8;Q7Z4H8-2;Q7Z4 KDEL2\_HUMAN KDEL motif-containing protein 2 OS=Homo sapiens GN=KDELC2 PE=1 SV=2;>sp|Q7Z4H8-2|KDEL2\_HUMAN Isoform 2 2.13E-18  
 Q7Z4Q2;Q7Z4Q2-2;Q7Z4 HEAT3\_HUMAN HEAT repeat-containing protein 3 OS=Homo sapiens GN=HEATR3 PE=1 SV=2;>sp|Q7Z4Q2-2|HEAT3\_HUMAN Isoform 1 1.24E-08  
 Q7Z739;Q9BYJ9 YTHD3\_HUMAN YTH domain family protein 3 OS=Homo sapiens GN=YTHDF3 PE=1 SV=1;>sp|Q9BYJ9|YTHD3\_HUMAN YTH domain family protein 3 1.36E-15  
 Q7Z7H5;Q7Z7H5-2;Q7Z7 TMD4\_HUMAN Transmembrane emp24 domain-containing protein 4 OS=Homo sapiens GN=TMED4 PE=1 SV=1;>sp|Q7Z7H5-2|TMED4\_HUMAN Isoform 1 1.71E-45  
 Q86SF2;Q4W5F7 GALT7\_HUMAN N-acetylgalactosaminyltransferase 7 OS=Homo sapiens GN=GALNT7 PE=1 SV=1;>tr|Q4W5F7|Q4W5F7\_HUMAN Putative N-acetylgalactosaminyltransferase 7 3.48E-09  
 Q86S22;Q86S22-2 TPC6B\_HUMAN Trafficking protein particle complex subunit 6B OS=Homo sapiens GN=TRAPPC6B PE=1 SV=1;>sp|Q86S22-2|TPC6B\_HUMAN Isoform 1 6.07E-14  
 Q86TB9;Q86TB9-4;Q86TB PATL1\_HUMAN Protein PAT1 homolog 1 OS=Homo sapiens GN=PATL1 PE=1 SV=2;>sp|Q86TB9-4|PATL1\_HUMAN Isoform 4 of Protein PAT1 2.55E-21  
 Q86TG7;Q86TG7-2 PEG10\_HUMAN Retrotransposon-derived protein PEG10 OS=Homo sapiens GN=PEG10 PE=1 SV=2;>sp|Q86TG7-2|PEG10\_HUMAN Isoform 1 8.86E-26  
 Q86TI2-2;Q86TI2;Q86TI2 2|DPP9\_HUMAN Isoform 2 of Dipeptidyl peptidase 9 OS=Homo sapiens GN=DPP9;>sp|Q86TI2|DPP9\_HUMAN Dipeptidyl peptidase 9 4.48E-06  
 Q86UP2;Q86UP2-2 KTN1\_HUMAN Kinectin OS=Homo sapiens GN=KTN1 PE=1 SV=1;>sp|Q86UP2-2|KTN1\_HUMAN Isoform 2 of Kinectin OS=Homo sapiens GN=KTN1 1.78E-42  
 Q86V21;Q86V21-2;Q9H9 AACS\_HUMAN Acetoacetyl-CoA synthetase OS=Homo sapiens GN=AACS PE=1 SV=1;>sp|Q86V21-2|AACS\_HUMAN Isoform 2 of Acetoacetyl-CoA synthetase 1.31E-06  
 Q86W42;Q86W42-3;Q86V THOC6\_HUMAN THO complex subunit 6 homolog OS=Homo sapiens GN=THOC6 PE=1 SV=1;>sp|Q86W42-3|THOC6\_HUMAN Isoform 1 9.41E-13  
 Q86X76-3;Q86X76;Q86X7 3|NIT1\_HUMAN Isoform 4 of Nitrilase homolog 1 OS=Homo sapiens GN=NIT1;>sp|Q86X76|NIT1\_HUMAN Nitrilase homolog 1 OS=Homo sapiens GN=NIT1 1.39E-13  
 Q86XP3;Q86XP3-2;B3KX2 DDX42\_HUMAN ATP-dependent RNA helicase DDX42 OS=Homo sapiens GN=DDX42 PE=1 SV=1;>sp|Q86XP3-2|DDX42\_HUMAN Isoform 1 8.29E-48  
 Q86Y56;Q86Y56-2;Q86Y5 HEAT2\_HUMAN HEAT repeat-containing protein 2 OS=Homo sapiens GN=HEATR2 PE=1 SV=4;>sp|Q86Y56-2|HEAT2\_HUMAN Isoform 1 1.99E-20  
 Q86Y56;Q86Y56-3;Q86Y5 HEAT2\_HUMAN HEAT repeat-containing protein 2 OS=Homo sapiens GN=HEATR2 PE=1 SV=4;>sp|Q86Y56-3|HEAT2\_HUMAN Isoform 1 3.52E-19  
 Q86YS6;A6NDJ8 RAB43\_HUMAN Ras-related protein Rab-43 OS=Homo sapiens GN=RAB43 PE=1 SV=1;>sp|A6NDJ8|RB43L\_HUMAN Putative Rab-43-like protein 8.44E-09

Q8IUE6;A2RUA4 H2A2B\_HUMAN Histone H2A type 2-B OS=Homo sapiens GN=HIST2H2AB PE=1 SV=3;>tr|A2RUA4|A2RUA4\_HUMAN Histone H2A OS= 5.92E-37  
Q8IUF8;Q8IUF8-4;Q8IUF8 MINA\_HUMAN MYC-induced nuclear antigen OS=Homo sapiens GN=MINA PE=1 SV=1;>sp|Q8IUF8-4|MINA\_HUMAN Isoform 4 of MYC- 2.61E-09  
Q8IUX7;Q8IUX7-2;B4DJB: AEBP1\_HUMAN Adipocyte enhancer-binding protein 1 OS=Homo sapiens GN=AEBP1 PE=1 SV=1;>sp|Q8IUX7-2|AEBP1\_HUMAN Isofor 9.76E-63  
Q8IVF2;Q8IVF2-3;Q8IVF2 AHNK2\_HUMAN Protein AHNK2 OS=Homo sapiens GN=AHNAK2 PE=1 SV=2;>sp|Q8IVF2-3|AHNK2\_HUMAN Isoform 3 of Protein AHN 7.28E-08  
Q8IVL6;Q8IVL6-2 P3H3\_HUMAN Prolyl 3-hydroxylase 3 OS=Homo sapiens GN=LEPREL2 PE=2 SV=1;>sp|Q8IVL6-2|P3H3\_HUMAN Isoform 2 of Prolyl 3-h 2.92E-14  
Q8IW45-2;Q8IW45;Q8IW: 2|CARKD\_HUMAN Isoform 2 of Carbohydrate kinase domain-containing protein OS=Homo sapiens GN=CARKD;>sp|Q8IW45|CARKD\_ 2.20E-17  
Q8IWC1;Q8IWC1-3;Q8IWA MA7D3\_HUMAN MAP7 domain-containing protein 3 OS=Homo sapiens GN=MAP7D3 PE=1 SV=2;>sp|Q8IWC1-3|MA7D3\_HUMAN Isofo 4.03E-23  
Q8IWE2;B4E1Z8;Q6MZV4 NXP20\_HUMAN Protein NOXP20 OS=Homo sapiens GN=FAM114A1 PE=1 SV=2;>tr|B4E1Z8|B4E1Z8\_HUMAN cDNA FLJ60392 OS=Hon 0  
Q8IWX8;B4DPM4;B4DL82 CHERP\_HUMAN Calcium homeostasis endoplasmic reticulum protein OS=Homo sapiens GN=CHERP PE=1 SV=3;>tr|B4DPM4|B4DPM4\_ 4.86E-10  
Q8IXB1;Q8IXB1-2 DJC10\_HUMAN DnaJ homolog subfamily C member 10 OS=Homo sapiens GN=DNAJC10 PE=1 SV=2;>sp|Q8IXB1-2|DJC10\_HUMAN Is 7.40E-22  
Q8IXI1;Q8IXI1-2;Q8IXI2- MIRO2\_HUMAN Mitochondrial Rho GTPase 2 OS=Homo sapiens GN=RHOT2 PE=1 SV=2;>sp|Q8IXI1-2|MIRO2\_HUMAN Isoform 2 of Mi 7.88E-94  
Q8IXI1;Q8IXI1-2;Q8IXI2- MIRO2\_HUMAN Mitochondrial Rho GTPase 2 OS=Homo sapiens GN=RHOT2 PE=1 SV=2;>sp|Q8IXI1-2|MIRO2\_HUMAN Isoform 2 of Mi 1.51E-96  
Q8IXQ6;Q8IXQ6-2;B7Z5L: PARP9\_HUMAN Poly [ADP-ribose] polymerase 9 OS=Homo sapiens GN=PARP9 PE=1 SV=2;>sp|Q8IXQ6-2|PARP9\_HUMAN Isoform 2 o 1.73E-20  
Q8IXT5;B9ZVT1 RB12B\_HUMAN RNA-binding protein 12B OS=Homo sapiens GN=RBM12B PE=1 SV=2;>tr|B9ZVT1|B9ZVT1\_HUMAN Uncharacterized p 1.64E-06  
Q8IY21;Q6MZF7 DDX60\_HUMAN Probable ATP-dependent RNA helicase DDX60 OS=Homo sapiens GN=DDX60 PE=2 SV=3;>tr|Q6MZF7|Q6MZF7\_HUM/ 4.82E-05  
Q8IY81;B4DKU3 RRMJ3\_HUMAN Putative rRNA methyltransferase 3 OS=Homo sapiens GN=FTSJ3 PE=1 SV=2;>tr|B4DKU3|B4DKU3\_HUMAN cDNA FLJ 3.48E-22  
Q8IYT8;B3KUZ9 ULK2\_HUMAN Serine/threonine-protein kinase ULK2 OS=Homo sapiens GN=ULK2 PE=1 SV=3;>tr|B3KUZ9|B3KUZ9\_HUMAN cDNA FL 6.02E-07  
Q8IZ83;B4DLQ1;B4DQ15; A16A1\_HUMAN Aldehyde dehydrogenase family 16 member A1 OS=Homo sapiens GN=ALDH16A1 PE=1 SV=2;>tr|B4DLQ1|B4DLQ1\_ 7.67E-19  
Q8N1F7;A8K897;B3KPQ8 NUP93\_HUMAN Nuclear pore complex protein Nup93 OS=Homo sapiens GN=NUP93 PE=1 SV=2;>tr|A8K897|A8K897\_HUMAN cDNA FI 1.15E-165  
Q8N2G8;Q8N2G8-2 GHDC\_HUMAN GH3 domain-containing protein OS=Homo sapiens GN=GHDC PE=1 SV=2;>sp|Q8N2G8-2|GHDC\_HUMAN Isoform 2 of 3.44E-10  
Q8N335;C9JM46;C9JFA7; GPD1L\_HUMAN Glycerol-3-phosphate dehydrogenase 1-like protein OS=Homo sapiens GN=GPD1L PE=1 SV=1;>tr|C9JM46|C9JM46\_ 3.00E-52  
Q8N474;A8KAM5;Q05DS5 SFRP1\_HUMAN Secreted frizzled-related protein 1 OS=Homo sapiens GN=SFRP1 PE=1 SV=1;>tr|A8KAM5|A8KAM5\_HUMAN cDNA FLJ 6.36E-14  
Q8N4V1-2;Q8N4V1 2|MMGT1\_HUMAN Isoform 2 of Membrane magnesium transporter 1 OS=Homo sapiens GN=MMGT1;>sp|Q8N4V1|MMGT1\_HUMAN Me 1.55E-29  
Q8N5K1;D6RCF4 CISD2\_HUMAN CDGSH iron-sulfur domain-containing protein 2 OS=Homo sapiens GN=CISD2 PE=1 SV=1;>tr|D6RCF4|D6RCF4\_HUM/ 4.09E-30  
Q8N5M1;C9J2Q2;B7Z3V0 ATPF2\_HUMAN ATP synthase mitochondrial F1 complex assembly factor 2 OS=Homo sapiens GN=ATPAF2 PE=1 SV=1;>tr|C9J2Q2|C9J 1.73E-09  
Q8N5M9;Q9BY51 JAGN1\_HUMAN Protein jagunal homolog 1 OS=Homo sapiens GN=JAGN1 PE=1 SV=1;>tr|Q9BY51|Q9BY51\_HUMAN GL009 OS=Homo 8.73E-07  
Q8N684-3;Q8N684;Q8N6: 3|CPSF7\_HUMAN Isoform 3 of Cleavage and polyadenylation specificity factor subunit 7 OS=Homo sapiens GN=CPSF7;>sp|Q8N684|C 5.04E-49  
Q8N6M0;B4DEY0 OTU6B\_HUMAN OTU domain-containing protein 6B OS=Homo sapiens GN=OTUD6B PE=1 SV=1;>tr|B4DEY0|B4DEY0\_HUMAN cDNA FI 1.63E-07  
Q8N7H5;Q8N7H5-2;E2QR: PAF1\_HUMAN RNA polymerase II-associated factor 1 homolog OS=Homo sapiens GN=PAF1 PE=1 SV=2;>sp|Q8N7H5-2|PAF1\_HUMAN 1.68E-27  
Q8N8S7;Q8N8S7-2;D0PQ: ENAH\_HUMAN Protein enabled homolog OS=Homo sapiens GN=ENAH PE=1 SV=2;>sp|Q8N8S7-2|ENAH\_HUMAN Isoform 2 of Protein 5.54E-102  
Q8NB90;Q8NB90-2 SPAT5\_HUMAN Spermatogenesis-associated protein 5 OS=Homo sapiens GN=SPATA5 PE=1 SV=3;>sp|Q8NB90-2|SPAT5\_HUMAN Is of 6.59E-09  
Q8NB90;Q8NB90-2;Q8NB: SPAT5\_HUMAN Spermatogenesis-associated protein 5 OS=Homo sapiens GN=SPATA5 PE=1 SV=3;>sp|Q8NB90-2|SPAT5\_HUMAN Is of 7.55E-16  
Q8NBN7;Q8NBN7-2 RDH13\_HUMAN Retinol dehydrogenase 13 OS=Homo sapiens GN=RDH13 PE=1 SV=2;>sp|Q8NBN7-2|RDH13\_HUMAN Isoform 2 of Re 8.32E-11  
Q8NBQ5;D6RCD0 DHB11\_HUMAN Estradiol 17-beta-dehydrogenase 11 OS=Homo sapiens GN=HSD17B11 PE=1 SV=3;>tr|D6RCD0|D6RCD0\_HUMAN Ur 1.09E-59  
Q8NBS9;Q658S9;Q6EHZ3 TXND5\_HUMAN Thioredoxin domain-containing protein 5 OS=Homo sapiens GN=TXNDC5 PE=1 SV=2;>tr|Q658S9|Q658S9\_HUMAN Pi 5.23E-289  
Q8NBT2;C9JGC4;B4E086; SPC24\_HUMAN Kinetochore protein Spc24 OS=Homo sapiens GN=SPC24 PE=1 SV=1;>tr|C9JGC4|C9JGC4\_HUMAN Uncharacterized p 8.18E-89  
Q8NC51;Q8NC51-2;Q8NC: PAIRB\_HUMAN Plasminogen activator inhibitor 1 RNA-binding protein OS=Homo sapiens GN=SERBP1 PE=1 SV=2;>sp|Q8NC51-2|PAIF 0  
Q8NC51;Q8NC51-3;Q8NC: PAIRB\_HUMAN Plasminogen activator inhibitor 1 RNA-binding protein OS=Homo sapiens GN=SERBP1 PE=1 SV=2;>sp|Q8NC51-3|PAIF 0  
Q8NC56;A8MS91;B4DVH5 LEMD2\_HUMAN LEM domain-containing protein 2 OS=Homo sapiens GN=LEMD2 PE=1 SV=1;>tr|A8MS91|A8MS91\_HUMAN Uncharact 1.83E-40  
Q8NCA5;Q8NCA5-2;Q05C: FA98A\_HUMAN Protein FAM98A OS=Homo sapiens GN=FAM98A PE=1 SV=1;>sp|Q8NCA5-2|FA98A\_HUMAN Isoform 2 of Protein FAM9 5.49E-05  
Q8NCM8-2;Q8NCM8 2|DYHC2\_HUMAN Isoform 2 of Cytoplasmic dynein 2 heavy chain 1 OS=Homo sapiens GN=DYNC2H1;>sp|Q8NCM8|DYHC2\_HUMAN C 5.36E-08  
Q8NCN5;B4DZL5;B3KU99 PDPR\_HUMAN Pyruvate dehydrogenase phosphatase regulatory subunit, mitochondrial OS=Homo sapiens GN=PDPR PE=1 SV=2;>tr|E 5.70E-09  
Q8NDI1;Q8NDI1-2;Q8NDI: EHBP1\_HUMAN EH domain-binding protein 1 OS=Homo sapiens GN=EHBP1 PE=1 SV=3;>sp|Q8NDI1-2|EHBP1\_HUMAN Isoform 2 of E 4.36E-11  
Q8NEZ5;Q8NEZ5-3;Q8NE: FBX22\_HUMAN F-box only protein 22 OS=Homo sapiens GN=FBXO22 PE=1 SV=1;>sp|Q8NEZ5-3|FBX22\_HUMAN Isoform 3 of F-box c 1.36E-09  
Q8NF37;D3DTC2 PCAT1\_HUMAN Lysophosphatidylcholine acyltransferase 1 OS=Homo sapiens GN=LPCAT1 PE=1 SV=2;>tr|D3DTC2|D3DTC2\_HUMAN A 9.99E-07  
Q8NF91;Q8NF91-4;Q8NF9: SYNE1\_HUMAN Nesprin-1 OS=Homo sapiens GN=SYNE1 PE=1 SV=3;>sp|Q8NF91-4|SYNE1\_HUMAN Isoform 4 of Nesprin-1 OS=Homo 2.08E-27  
Q8NFA0;P35125-2 UBP32\_HUMAN Ubiquitin carboxyl-terminal hydrolase 32 OS=Homo sapiens GN=USP32 PE=1 SV=1;>sp|P35125-2|UBP6\_HUMAN Is of 7.02E-09  
Q8NFB4;Q8NFB4-4;D3DX: ABHDB\_HUMAN Abhydrolase domain-containing protein 11 OS=Homo sapiens GN=ABHD11 PE=1 SV=1;>sp|Q8NFB4-4|ABHDB\_HUMA 6.22E-18  
Q8NHG8;Q8NEX1 ZNRF2\_HUMAN E3 ubiquitin-protein ligase ZNRF2 OS=Homo sapiens GN=ZNRF2 PE=1 SV=1;>tr|Q8NEX1|Q8NEX1\_HUMAN Ells2 (Fraç 5.68E-07  
Q8NHH9;Q8NHH9-2;Q8NH: ATLA2\_HUMAN Atlantin-2 OS=Homo sapiens GN=ATL2 PE=1 SV=2;>sp|Q8NHH9-2|ATLA2\_HUMAN Isoform 2 of Atlantin-2 OS=Homo s 0.00011348  
Q8NHH9;Q8NHH9-3;Q8NH: ATLA2\_HUMAN Atlantin-2 OS=Homo sapiens GN=ATL2 PE=1 SV=2;>sp|Q8NHH9-3|ATLA2\_HUMAN Isoform 3 of Atlantin-2 OS=Homo s 2.68E-19  
Q8NHP6;Q8NHP6-2 MSPD2\_HUMAN Motile sperm domain-containing protein 2 OS=Homo sapiens GN=MOSPD2 PE=1 SV=1;>sp|Q8NHP6-2|MSPD2\_HUMA 6.21E-08  
Q8NHQ9;B4DVE4 DDX55\_HUMAN ATP-dependent RNA helicase DDX55 OS=Homo sapiens GN=DDX55 PE=1 SV=3;>tr|B4DVE4|B4DVE4\_HUMAN cDNA F 2.26E-12  
Q8TAE8;Q7LAX7 G45IP\_HUMAN Growth arrest and DNA damage-inducible proteins-interacting protein 1 OS=Homo sapiens GN=GADD45GIP1 PE=1 SV 3.25E-21  
Q8TAQ2;Q8TAQ2-2 SMRC2\_HUMAN SWI/SNF complex subunit SMARCC2 OS=Homo sapiens GN=SMARCC2 PE=1 SV=1;>sp|Q8TAQ2-2|SMRC2\_HUMAN Is 6.31E-208  
Q8TAT6-2;Q8TAT6;B4DG8 2|NPL4\_HUMAN Isoform 2 of Nuclear protein localization protein 4 homolog OS=Homo sapiens GN=NPLOC4;>sp|Q8TAT6|NPL4\_HUMA 1.10E-117  
Q8TBX8;B4DY44;B4DM11: PI42C\_HUMAN Phosphatidylinositol-5-phosphate 4-kinase type-2 gamma OS=Homo sapiens GN=PIP4K2C PE=1 SV=3;>tr|B4DY44|B4 1.34E-08  
Q8TC07-2;Q8TC07;B4DM1: TBC15\_HUMAN Isoform 2 of TBC1 domain family member 15 OS=Homo sapiens GN=TBC1D15;>sp|Q8TC07|TBC15\_HUMAN TBC1 d 1.35E-11  
Q8TC12;Q8TC12-2;B4DDV: RDH11\_HUMAN Retinol dehydrogenase 11 OS=Homo sapiens GN=RDH11 PE=1 SV=2;>sp|Q8TC12-2|RDH11\_HUMAN Isoform 2 of Re 1.48E-46  
Q8TCC3-2;Q8TCC3;Q8TCC: 2|RM30\_HUMAN Isoform 2 of 39S ribosomal protein L30, mitochondrial OS=Homo sapiens GN=MRPL30;>sp|Q8TCC3|RM30\_HUMAN 3 9.48E-11  
Q8TCT9;Q8TCT9-5;Q8TCT: HM13\_HUMAN Minor histocompatibility antigen H13 OS=Homo sapiens GN=HM13 PE=1 SV=1;>sp|Q8TCT9-5|HM13\_HUMAN Isoform 1 1.54E-39

|                       |                                                                                                                             |           |
|-----------------------|-----------------------------------------------------------------------------------------------------------------------------|-----------|
| Q8TD06;B5MC62         | AGR3_HUMAN Anterior gradient protein 3 homolog OS=Homo sapiens GN=AGR3 PE=1 SV=1;>tr B5MC62 B5MC62_HUMAN Uncharact          | 1.89E-158 |
| Q8TD30;Q8TD30-2       | ALAT2_HUMAN Alanine aminotransferase 2 OS=Homo sapiens GN=GPT2 PE=1 SV=1;>sp Q8TD30-2 ALAT2_HUMAN Isoform 2 of Alan         | 2.28E-23  |
| Q8TD55;Q8TD55-2;B3KTV | PKHO2_HUMAN Pleckstrin homology domain-containing family O member 2 OS=Homo sapiens GN=PLEKHO2 PE=1 SV=1;>sp Q8TD55         | 7.44E-11  |
| Q8TDN6;A0JLQ5;B4E0B8  | BRX1_HUMAN Ribosome biogenesis protein BRX1 homolog OS=Homo sapiens GN=BRX1 PE=1 SV=2;>tr A0JLQ5 A0JLQ5_HUMAN BX            | 5.88E-100 |
| Q8TDP1;Q8TDP1-2;B4DM  | RNH2C_HUMAN Ribonuclease H2 subunit C OS=Homo sapiens GN=RNASEH2C PE=1 SV=1;>sp Q8TDP1-2 RNH2C_HUMAN Isoform 2              | 3.37E-05  |
| Q8TDQ7;Q8TDQ7-3;Q8TD  | GNPI2_HUMAN Glucosamine-6-phosphate isomerase 2 OS=Homo sapiens GN=GNPDA2 PE=1 SV=1;>sp Q8TDQ7-3 GNPI2_HUMAN Is             | 4.10E-276 |
| Q8TDX7;Q8TDX7-2       | NEK7_HUMAN Serine/threonine-protein kinase Nek7 OS=Homo sapiens GN=NEK7 PE=1 SV=1;>sp Q8TDX7-2 NEK7_HUMAN Isoform           | 5.98E-11  |
| Q8TED1;B4DPY0         | GPX8_HUMAN Probable glutathione peroxidase 8 OS=Homo sapiens GN=GPX8 PE=1 SV=2;>tr B4DPY0 B4DPY0_HUMAN Glutathione          | 3.30E-10  |
| Q8TEQ6;B7ZLC9;Q58EZ8  | GEM15_HUMAN Gem-associated protein 5 OS=Homo sapiens GN=GEMIN5 PE=1 SV=3;>tr B7ZLC9 B7ZLC9_HUMAN GEMIN5 protein C           | 2.23E-30  |
| Q8WTS6;D6RJA0         | SETD7_HUMAN Histone-lysine N-methyltransferase SETD7 OS=Homo sapiens GN=SETD7 PE=1 SV=1;>tr D6RJA0 D6RJA0_HUMAN Ur          | 1.30E-12  |
| Q8WTW3;Q4G0L8;B3KUY   | COG1_HUMAN Conserved oligomeric Golgi complex subunit 1 OS=Homo sapiens GN=COG1 PE=1 SV=1;>tr Q4G0L8 Q4G0L8_HUMAN           | 4.89E-25  |
| Q8WUA2;Q6P392;Q32Q83  | PPIL4_HUMAN Peptidyl-prolyl cis-trans isomerase-like 4 OS=Homo sapiens GN=PPIL4 PE=1 SV=1;>tr Q6P392 Q6P392_HUMAN PPIL4     | 7.28E-07  |
| Q8WUF5;Q6ZNZ8         | IASPP_HUMAN RelA-associated inhibitor OS=Homo sapiens GN=PPP1R13L PE=1 SV=4;>tr Q6ZNZ8 Q6ZNZ8_HUMAN cDNA FLJ26816           | 9.81E-23  |
| Q8WUH6;B3KMF8         | CL023_HUMAN UPF0444 transmembrane protein C12orf23 OS=Homo sapiens GN=C12orf23 PE=1 SV=1;>tr B3KMF8 B3KMF8_HUMAN            | 1.27E-54  |
| Q8WUM0;B4E206;B4E3T7  | NU133_HUMAN Nuclear pore complex protein Nup133 OS=Homo sapiens GN=NUP133 PE=1 SV=2;>tr B4E206 B4E206_HUMAN cDNA            | 1.89E-19  |
| Q8WV24;A2BDE7;B4E2D4  | PHLA1_HUMAN Pleckstrin homology-like domain family A member 1 OS=Homo sapiens GN=PHLDA1 PE=1 SV=4;>tr A2BDE7 A2BDE7         | 6.67E-08  |
| Q8WV92;B8ZZL5         | MITD1_HUMAN MIT domain-containing protein 1 OS=Homo sapiens GN=MITD1 PE=1 SV=1;>tr B8ZZL5 B8ZZL5_HUMAN Uncharacter          | 1.68E-08  |
| Q8WVC0;Q8WVC0-2       | LEO1_HUMAN RNA polymerase-associated protein LEO1 OS=Homo sapiens GN=LEO1 PE=1 SV=1;>sp Q8WVC0-2 LEO1_HUMAN Isofc           | 2.43E-06  |
| Q8WVQ1;Q8WVQ1-2       | CANT1_HUMAN Soluble calcium-activated nucleotidase 1 OS=Homo sapiens GN=CANT1 PE=1 SV=1;>sp Q8WVQ1-2 CANT1_HUMAN I          | 1.88E-05  |
| Q8WW59;B4DUC9         | SPRY4_HUMAN SPRY domain-containing protein 4 OS=Homo sapiens GN=SPRYD4 PE=1 SV=2;>tr B4DUC9 B4DUC9_HUMAN cDNA FL            | 2.77E-16  |
| Q8WWM7-3;Q8WWM7;Q8    | 3 ATX2L_HUMAN Isoform 3 of Ataxin-2-like protein OS=Homo sapiens GN=ATXN2L;>sp Q8WWM7 ATX2L_HUMAN Ataxin-2-like protei      | 4.81E-46  |
| Q8WWY3;Q8WWY3-2       | PRP31_HUMAN U4/U6 small nuclear ribonucleoprotein Prp31 OS=Homo sapiens GN=PRPF31 PE=1 SV=2;>sp Q8WWY3-2 PRP31_HUM          | 2.72E-56  |
| Q8WWY3;Q8WWY3-2;Q8V   | PRP31_HUMAN U4/U6 small nuclear ribonucleoprotein Prp31 OS=Homo sapiens GN=PRPF31 PE=1 SV=2;>sp Q8WWY3-2 PRP31_HUM          | 4.34E-56  |
| Q8WX93;Q8WX93-5;Q8W   | PALLD_HUMAN Palladin OS=Homo sapiens GN=PALLD PE=1 SV=3;>sp Q8WX93-5 PALLD_HUMAN Isoform 5 of Palladin OS=Homo sap          | 3.82E-61  |
| Q8WXF1;Q8WXF1-2       | PSPC1_HUMAN Paraspeckle component 1 OS=Homo sapiens GN=PSPC1 PE=1 SV=1;>sp Q8WXF1-2 PSPC1_HUMAN Isoform 2 of Para           | 5.80E-71  |
| Q8WXH0-2;Q8WXH0;D4Y1  | 2 SYNE2_HUMAN Isoform 2 of Nesprin-2 OS=Homo sapiens GN=SYNE2;>sp Q8WXH0 SYNE2_HUMAN Nesprin-2 OS=Homo sapiens G            | 3.64E-10  |
| Q8WXI9;Q86YP4;Q86YP4- | P66B_HUMAN Transcriptional repressor p66-beta OS=Homo sapiens GN=GATAD2B PE=1 SV=1;>sp Q86YP4 P66A_HUMAN Transcrip          | 4.96E-42  |
| Q92520;C9JMN4;C9JP35  | FAM3C_HUMAN Protein FAM3C OS=Homo sapiens GN=FAM3C PE=1 SV=1;>tr C9JMN4 C9JMN4_HUMAN Uncharacterized protein OS=            | 3.55E-178 |
| Q92538;Q149P0;Q149P1  | GBF1_HUMAN Golgi-specific brefeldin A-resistance guanine nucleotide exchange factor 1 OS=Homo sapiens GN=GBF1 PE=1 SV=2;>tr | 8.37E-24  |
| Q92544;B4DKC1;B4DH88  | TM9S4_HUMAN Transmembrane 9 superfamily member 4 OS=Homo sapiens GN=TM9SF4 PE=1 SV=2;>tr B4DKC1 B4DKC1_HUMAN c              | 1.76E-08  |
| Q92575;B4E240;B3KTD5  | UBXN4_HUMAN UBX domain-containing protein 4 OS=Homo sapiens GN=UBXN4 PE=1 SV=2;>tr B4E240 B4E240_HUMAN cDNA FLJ5            | 3.66E-16  |
| Q92598;Q92598-3;Q9259 | HS105_HUMAN Heat shock protein 105 kDa OS=Homo sapiens GN=HSPH1 PE=1 SV=1;>sp Q92598-3 HS105_HUMAN Isoform 3 of H           | 4.31E-288 |
| Q92599;Q92599-2;Q9259 | SEPT8_HUMAN Septin-8 OS=Homo sapiens GN=SEPT8 PE=1 SV=4;>sp Q92599-2 SEPT8_HUMAN Isoform 2 of Septin-8 OS=Homo sa           | 7.30E-14  |
| Q92621;B4DE72;Q6P486; | NU205_HUMAN Nuclear pore complex protein Nup205 OS=Homo sapiens GN=NUP205 PE=1 SV=3;>tr B4DE72 B4DE72_HUMAN cDNA/           | 1.46E-41  |
| Q92643;A6NEM5;B4E2M3  | GPI8_HUMAN GPI-anchor transamidase OS=Homo sapiens GN=PIGK PE=1 SV=2;>tr A6NEM5 A6NEM5_HUMAN Uncharacterized prote          | 3.90E-26  |
| Q92688;Q92688-2       | AN32B_HUMAN Acidic leucine-rich nuclear phosphoprotein 32 family member B OS=Homo sapiens GN=ANP32B PE=1 SV=1;>sp Q926      | 4.23E-114 |
| Q92692;Q92692-2       | PVRL2_HUMAN Poliovirus receptor-related protein 2 OS=Homo sapiens GN=PVRL2 PE=1 SV=1;>sp Q92692-2 PVRL2_HUMAN Isoform       | 7.56E-30  |
| Q92879-4;Q92879;Q9287 | 4 CELF1_HUMAN Isoform 4 of CUGBP Elav-like family member 1 OS=Homo sapiens GN=CELF1;>sp Q92879 CELF1_HUMAN CUGBP El         | 5.30E-25  |
| Q92896-2;Q92896       | 2 GSLG1_HUMAN Isoform 2 of Golgi apparatus protein 1 OS=Homo sapiens GN=GLG1;>sp Q92896 GSLG1_HUMAN Golgi apparatus p       | 2.19E-29  |
| Q92905;Q59GH5         | CSN5_HUMAN COP9 signalosome complex subunit 5 OS=Homo sapiens GN=COPS5 PE=1 SV=4;>tr Q59GH5 Q59GH5_HUMAN COP9 s             | 1.50E-67  |
| Q92925;Q96GM5;Q92925  | SMRD2_HUMAN SWI/SNF-related matrix-associated actin-dependent regulator of chromatin subfamily D member 2 OS=Homo sapiens   | 3.73E-06  |
| Q92930;B4DMS1         | RAB8B_HUMAN Ras-related protein Rab-8B OS=Homo sapiens GN=RAB8B PE=1 SV=2;>tr B4DMS1 B4DMS1_HUMAN cDNA FLJ52970             | 3.35E-33  |
| Q92947;B4DK85;Q92947- | GCDH_HUMAN Glutaryl-CoA dehydrogenase, mitochondrial OS=Homo sapiens GN=GCDH PE=1 SV=1;>tr B4DK85 B4DK85_HUMAN cl           | 3.76E-11  |
| Q92947;Q92947-2       | GCDH_HUMAN Glutaryl-CoA dehydrogenase, mitochondrial OS=Homo sapiens GN=GCDH PE=1 SV=1;>sp Q92947-2 GCDH_HUMAN I            | 1.51E-49  |
| Q93008;Q93008-1;O0050 | USP9X_HUMAN Probable ubiquitin carboxyl-terminal hydrolase FAF-X OS=Homo sapiens GN=USP9X PE=1 SV=3;>sp Q93008-1 USP9       | 6.97E-10  |
| Q93009;Q6U8A4;B7Z815; | UBP7_HUMAN Ubiquitin carboxyl-terminal hydrolase 7 OS=Homo sapiens GN=USP7 PE=1 SV=2;>tr Q6U8A4 Q6U8A4_HUMAN Ubiquit        | 1.94E-72  |
| Q93045;B7Z4N6         | STMN2_HUMAN Stathmin-2 OS=Homo sapiens GN=STMN2 PE=1 SV=3;>tr B7Z4N6 B7Z4N6_HUMAN Stathmin OS=Homo sapiens PE               | 2.90E-28  |
| Q969G3;Q969G3-2       | SMCE1_HUMAN SWI/SNF-related matrix-associated actin-dependent regulator of chromatin subfamily E member 1 OS=Homo sapiens   | 2.08E-12  |
| Q969Q5;Q8WY67;A8MSV4  | RAB24_HUMAN Ras-related protein Rab-24 OS=Homo sapiens GN=RAB24 PE=1 SV=1;>tr Q8WY67 Q8WY67_HUMAN PP4748 OS=Hoi             | 1.86E-17  |
| Q969T9;B4DDJ2;Q7Z511; | WBP2_HUMAN WW domain-binding protein 2 OS=Homo sapiens GN=WBP2 PE=1 SV=1;>tr B4DDJ2 B4DDJ2_HUMAN cDNA FLJ59459              | 5.27E-13  |
| Q969U7;Q9P1R6;Q9NRV1  | PSMG2_HUMAN Proteasome assembly chaperone 2 OS=Homo sapiens GN=PSMG2 PE=1 SV=1;>tr Q9P1R6 Q9P1R6_HUMAN HDCMC2               | 1.62E-10  |
| Q969X5;Q969X5-2       | ERGI1_HUMAN Endoplasmic reticulum-Golgi intermediate compartment protein 1 OS=Homo sapiens GN=ERGIC1 PE=1 SV=1;>sp Q9       | 3.97E-27  |
| Q969X6;Q969X6-3;Q969X | CIR1A_HUMAN Cirhin OS=Homo sapiens GN=CIRH1A PE=1 SV=1;>sp Q969X6-3 CIR1A_HUMAN Isoform 3 of Cirhin OS=Homo sapier          | 1.82E-10  |
| Q96A26;C9JYF2;B4DF97  | F162A_HUMAN Protein FAM162A OS=Homo sapiens GN=FAM162A PE=1 SV=2;>tr C9JYF2 C9JYF2_HUMAN Uncharacterized protein O          | 5.32E-39  |
| Q96A72;P61326         | MGN2_HUMAN Protein mago nashi homolog 2 OS=Homo sapiens GN=MAGOHB PE=1 SV=1;>sp P61326 MGN_HUMAN Protein mago r             | 4.48E-43  |
| Q96A72;P61326;A6NEC0; | MGN2_HUMAN Protein mago nashi homolog 2 OS=Homo sapiens GN=MAGOHB PE=1 SV=1;>sp P61326 MGN_HUMAN Protein mago r             | 6.33E-51  |
| Q96AY3;Q658U4;Q6ZME7  | FKB10_HUMAN Peptidyl-prolyl cis-trans isomerase FKBP10 OS=Homo sapiens GN=FKBP10 PE=1 SV=1;>tr Q658U4 Q658U4_HUMAN I        | 4.76E-29  |
| Q96AZ6;Q96AZ6-2       | ISG20_HUMAN Interferon-stimulated gene 20 kDa protein OS=Homo sapiens GN=ISG20 PE=1 SV=2;>sp Q96AZ6-2 ISG20_HUMAN I         | 9.85E-11  |
| Q96BJ3;Q96BJ3-3       | AIDA_HUMAN Axin interactor, dorsalization-associated protein OS=Homo sapiens GN=AIDA PE=1 SV=1;>sp Q96BJ3-3 AIDA_HUMAN      | 2.97E-13  |
| Q96BM9;B2R7U5         | ARL8A_HUMAN ADP-ribosylation factor-like protein 8A OS=Homo sapiens GN=ARL8A PE=1 SV=1;>tr B2R7U5 B2R7U5_HUMAN cDNA,        | 1.71E-16  |
| Q96BP3;B4DT22;B4DP34; | PPWD1_HUMAN Peptidylprolyl isomerase domain and WD repeat-containing protein 1 OS=Homo sapiens GN=PPWD1 PE=1 SV=1;>tr       | 3.06E-12  |



|                        |                                                                                                                            |           |
|------------------------|----------------------------------------------------------------------------------------------------------------------------|-----------|
| Q96BX8;Q6AI16          | MOL2A_HUMAN Mps one binder kinase activator-like 2A OS=Homo sapiens GN=MOBKL2A PE=1 SV=1;>tr Q6AI16 Q6AI16_HUMAN Pt        | 3.84E-06  |
| Q96BY6;Q96BY6-2        | DOC10_HUMAN Dedicator of cytokinesis protein 10 OS=Homo sapiens GN=DOCK10 PE=1 SV=3;>sp Q96BY6-2 DOC10_HUMAN Isofo         | 4.30E-18  |
| Q96C01;B0AZT6;C9J2Y4   | F136A_HUMAN Protein FAM136A OS=Homo sapiens GN=FAM136A PE=1 SV=1;>tr B0AZT6 B0AZT6_HUMAN cDNA, FLJ79526 OS=Hor             | 5.96E-09  |
| Q96C19;Q5JYW8;C9JT16   | EFHD2_HUMAN EF-hand domain-containing protein D2 OS=Homo sapiens GN=EFHD2 PE=1 SV=1;>tr Q5JYW8 Q5JYW8_HUMAN EF-h           | 4.54E-40  |
| Q96C19;Q9BUP0          | EFHD2_HUMAN EF-hand domain-containing protein D2 OS=Homo sapiens GN=EFHD2 PE=1 SV=1;>sp Q9BUP0 EFHD1_HUMAN EF-ha           | 3.04E-08  |
| Q96C36;Q4W8W1;B3KMB    | P5CR2_HUMAN Pyrroline-5-carboxylate reductase 2 OS=Homo sapiens GN=PYCR2 PE=1 SV=1;>tr Q4W8W1 Q4W8W1_HUMAN Pyrrol          | 6.65E-67  |
| Q96C86;Q53G42          | DCPS_HUMAN Scavenger mRNA-decapping enzyme DcpS OS=Homo sapiens GN=DCPS PE=1 SV=2;>tr Q53G42 Q53G42_HUMAN mR               | 1.92E-105 |
| Q96CG8;Q96CG8-2        | CTHR1_HUMAN Collagen triple helix repeat-containing protein 1 OS=Homo sapiens GN=CTHR1 PE=1 SV=1;>sp Q96CG8-2 CTHR1_H      | 3.84E-33  |
| Q96CN7;D6RE73;D6RGE2   | ISOC1_HUMAN Isochorismatase domain-containing protein 1 OS=Homo sapiens GN=ISOC1 PE=1 SV=3;>tr D6RE73 D6RE73_HUMAN         | 5.15E-45  |
| Q96CS2;Q96CS2-2        | HAUS1_HUMAN HAUS augmin-like complex subunit 1 OS=Homo sapiens GN=HAUS1 PE=1 SV=1;>sp Q96CS2-2 HAUS1_HUMAN Isofo           | 5.86E-08  |
| Q96CS3;B4E2M8          | FAF2_HUMAN FAS-associated factor 2 OS=Homo sapiens GN=FAF2 PE=1 SV=2;>tr B4E2M8 B4E2M8_HUMAN cDNA FLJ61076, highly         | 1.68E-19  |
| Q96CW1;Q96CW1-2        | AP2M1_HUMAN AP-2 complex subunit mu OS=Homo sapiens GN=AP2M1 PE=1 SV=2;>sp Q96CW1-2 AP2M1_HUMAN Isoform 2 of AP            | 3.62E-64  |
| Q96DA0;C3PTT6          | ZG16B_HUMAN Zymogen granule protein 16 homolog B OS=Homo sapiens GN=ZG16B PE=1 SV=3;>tr C3PTT6 C3PTT6_HUMAN Panc           | 1.19E-09  |
| Q96DB5;B4DZW6;B4DNF5   | RMD1_HUMAN Regulator of microtubule dynamics protein 1 OS=Homo sapiens GN=FAM82B PE=1 SV=1;>tr B4DZW6 B4DZW6_HUMA          | 2.23E-60  |
| Q96DC8;Q96DC8-2        | ECHD3_HUMAN Enoyl-CoA hydratase domain-containing protein 3, mitochondrial OS=Homo sapiens GN=ECHDC3 PE=1 SV=2;>sp Q9      | 1.79E-08  |
| Q96DH6;Q96DH6-2        | MSI2H_HUMAN RNA-binding protein Musashi homolog 2 OS=Homo sapiens GN=MSI2 PE=1 SV=1;>sp Q96DH6-2 MSI2H_HUMAN Isof          | 1.11E-16  |
| Q96DH6;Q96DH6-2;Q96D   | MSI2H_HUMAN RNA-binding protein Musashi homolog 2 OS=Homo sapiens GN=MSI2 PE=1 SV=1;>sp Q96DH6-2 MSI2H_HUMAN Isof          | 2.75E-101 |
| Q96DV4;B2R894;B3KN96   | RM38_HUMAN 39S ribosomal protein L38, mitochondrial OS=Homo sapiens GN=MRPL38 PE=1 SV=2;>tr B2R894 B2R894_HUMAN Mit        | 4.12E-07  |
| Q96E11;Q96E11-3;Q96E1  | RRFM_HUMAN Ribosome-recycling factor, mitochondrial OS=Homo sapiens GN=MRRF PE=1 SV=1;>sp Q96E11-3 RRFM_HUMAN Isofo        | 8.34E-43  |
| Q96EB1-2;Q96EB1        | 2 ELP4_HUMAN Isoform 2 of Elongator complex protein 4 OS=Homo sapiens GN=ELP4;>sp Q96EB1 ELP4_HUMAN Elongator complex      | 4.84E-10  |
| Q96EL3;B9A051          | RM53_HUMAN 39S ribosomal protein L53, mitochondrial OS=Homo sapiens GN=MRPL53 PE=1 SV=1;>tr B9A051 B9A051_HUMAN Un         | 6.48E-07  |
| Q96EP5;Q96EP5-2;Q5IRN  | DAZP1_HUMAN DAZ-associated protein 1 OS=Homo sapiens GN=DAZAP1 PE=1 SV=1;>sp Q96EP5-2 DAZP1_HUMAN Isoform 2 of DA          | 7.55E-37  |
| Q96EQ0;D6RFW1          | SGTB_HUMAN Small glutamine-rich tetratricopeptide repeat-containing protein beta OS=Homo sapiens GN=SGTB PE=1 SV=1;>tr D6f | 9.03E-09  |
| Q96ER3;B3KVU5          | SAAL1_HUMAN Protein SAAL1 OS=Homo sapiens GN=SAAL1 PE=1 SV=2;>tr B3KVU5 B3KVU5_HUMAN cDNA FLJ41463 fis, clone BRS          | 5.01E-15  |
| Q96EY4;D6RA57;B7Z504   | CD043_HUMAN UPF0534 protein C4orf43 OS=Homo sapiens GN=C4orf43 PE=1 SV=2;>tr D6RA57 D6RA57_HUMAN Uncharacterized i         | 5.55E-13  |
| Q96EY7;Q96EY7-2        | PTCD3_HUMAN Pentatricopeptide repeat-containing protein 3, mitochondrial OS=Homo sapiens GN=PTCD3 PE=1 SV=3;>sp Q96EY7-2   | 2.21E-13  |
| Q96FJ0-2;Q96FJ0        | 2 STALP_HUMAN Isoform 2 of AMSH-like protease OS=Homo sapiens GN=STAMBPL1;>sp Q96FJ0 STALP_HUMAN AMSH-like protease        | 3.10E-62  |
| Q96FN4;Q9UBL6;Q9HCH3   | CPNE2_HUMAN Copine-2 OS=Homo sapiens GN=CPNE2 PE=1 SV=3;>sp Q9UBL6 CPNE2_HUMAN Copine-7 OS=Homo sapiens GN=CF              | 1.11E-21  |
| Q96FV2;Q9BU04;B7Z8S7   | SCRN2_HUMAN Secernin-2 OS=Homo sapiens GN=SCRN2 PE=2 SV=3;>tr Q9BU04 Q9BU04_HUMAN Ses2 protein (Fragment) OS=Hc            | 1.17E-19  |
| Q96G03;B4DN40          | PGM2_HUMAN Phosphoglucomutase-2 OS=Homo sapiens GN=PGM2 PE=1 SV=4;>tr B4DN40 B4DN40_HUMAN cDNA FLJ54368, highl             | 8.77E-222 |
| Q96GA3;B4DTT8          | LTV1_HUMAN Protein LTV1 homolog OS=Homo sapiens GN=LTV1 PE=1 SV=1;>tr B4DTT8 B4DTT8_HUMAN cDNA FLJ61396 OS=Homc            | 2.98E-51  |
| Q96GC5;B4DN34          | RM48_HUMAN 39S ribosomal protein L48, mitochondrial OS=Homo sapiens GN=MRPL48 PE=1 SV=2;>tr B4DN34 B4DN34_HUMAN c[         | 7.72E-76  |
| Q96GG9;C9JVE2;B4DM76   | DCNL1_HUMAN DCN1-like protein 1 OS=Homo sapiens GN=DCUN1D1 PE=1 SV=1;>tr C9JVE2 C9JVE2_HUMAN DCN1, defective in cul        | 1.59E-39  |
| Q96GM8;B4DP23          | TOE1_HUMAN Target of EGR1 protein 1 OS=Homo sapiens GN=TOE1 PE=1 SV=1;>tr B4DP23 B4DP23_HUMAN cDNA FLJ57546, highl         | 2.02E-05  |
| Q96GQ7;B3GQE6;B7Z6D5   | DDX27_HUMAN Probable ATP-dependent RNA helicase DDX27 OS=Homo sapiens GN=DDX27 PE=1 SV=2;>tr B3GQE6 B3GQE6_HUMA            | 1.12E-07  |
| Q96H20;Q96H20-2;D6RFY  | SNF8_HUMAN Vacuolar-sorting protein SNF8 OS=Homo sapiens GN=SNF8 PE=1 SV=1;>sp Q96H20-2 SNF8_HUMAN Isoform 2 of Vac        | 2.01E-10  |
| Q96HF1;B3KSM5          | SFRP2_HUMAN Secreted frizzled-related protein 2 OS=Homo sapiens GN=SFRP2 PE=1 SV=2;>tr B3KSM5 B3KSM5_HUMAN cDNA FLJ        | 8.18E-08  |
| Q96I99;Q3ZCW5;C9JVT2;  | SUCB2_HUMAN Succinyl-CoA ligase [GDP-forming] subunit beta, mitochondrial OS=Homo sapiens GN=SUCLG2 PE=1 SV=2;>tr Q3ZC     | 6.65E-199 |
| Q96J01;Q6NZ53;D6RGZ2   | THOC3_HUMAN THO complex subunit 3 OS=Homo sapiens GN=THOC3 PE=1 SV=1;>tr Q6NZ53 Q6NZ53_HUMAN THOC3 protein OS=             | 2.51E-18  |
| Q96JB2;Q96JB2-2;B4DH7  | COG3_HUMAN Conserved oligomeric Golgi complex subunit 3 OS=Homo sapiens GN=COG3 PE=1 SV=3;>sp Q96JB2-2 COG3_HUMAN          | 2.87E-79  |
| Q96JB5;Q96JB5-2;Q96JB5 | CK5P3_HUMAN CDK5 regulatory subunit-associated protein 3 OS=Homo sapiens GN=CDK5RAP3 PE=1 SV=2;>sp Q96JB5-2 CK5P3_H        | 1.91E-07  |
| Q96JH7;B4DM84          | VCIP1_HUMAN Deubiquitinating protein VCIP135 OS=Homo sapiens GN=VCIP1 PE=1 SV=2;>tr B4DM84 B4DM84_HUMAN cDNA FLJ(          | 2.40E-32  |
| Q96JJ7;Q96JJ7-2        | TMX3_HUMAN Protein disulfide-isomerase TMX3 OS=Homo sapiens GN=TMX3 PE=1 SV=2;>sp Q96JJ7-2 TMX3_HUMAN Isoform 2 of I       | 7.58E-41  |
| Q96JY6-3;Q96JY6;Q96JY6 | 3 PDLI2_HUMAN Isoform 3 of PDZ and LIM domain protein 2 OS=Homo sapiens GN=PDLIM2;>sp Q96JY6 PDLI2_HUMAN PDZ and LIM       | 5.21E-15  |
| Q96K76;Q96K76-2        | UBP47_HUMAN Ubiquitin carboxyl-terminal hydrolase 47 OS=Homo sapiens GN=USP47 PE=1 SV=3;>sp Q96K76-2 UBP47_HUMAN Is        | 4.00E-15  |
| Q96KC8;Q96NY3;A4VCI1   | DNJC1_HUMAN DnaJ homolog subfamily C member 1 OS=Homo sapiens GN=DNAJC1 PE=1 SV=1;>tr Q96NY3 Q96NY3_HUMAN DnaJ             | 7.93E-11  |
| Q96KP4;Q96KP4-2        | CNDP2_HUMAN Cytosolic non-specific dipeptidase OS=Homo sapiens GN=CNDP2 PE=1 SV=2;>sp Q96KP4-2 CNDP2_HUMAN Isoform         | 1.74E-158 |
| Q96N66;Q96N66-2;Q96N6  | MBOA7_HUMAN Lysophospholipid acyltransferase 7 OS=Homo sapiens GN=MBOAT7 PE=1 SV=2;>sp Q96N66-2 MBOA7_HUMAN Isofo          | 4.93E-65  |
| Q96NY7;Q96NY7-2;Q9NZ   | CLIC6_HUMAN Chloride intracellular channel protein 6 OS=Homo sapiens GN=CLIC6 PE=2 SV=3;>sp Q96NY7-2 CLIC6_HUMAN Isofor    | 1.02E-16  |
| Q96PD5-2;Q96PD5        | 2 PGRP2_HUMAN Isoform 2 of N-acetylmuramoyl-L-alanine amidase OS=Homo sapiens GN=PGLYRP2;>sp Q96PD5 PGRP2_HUMAN N-         | 8.07E-165 |
| Q96PK6;Q96PK6-2;B0LM4  | RBM14_HUMAN RNA-binding protein 14 OS=Homo sapiens GN=RBM14 PE=1 SV=2;>sp Q96PK6-2 RBM14_HUMAN Isoform 2 of RNA-           | 5.29E-106 |
| Q96RQ3;Q68D27;B4DH16   | MCCA_HUMAN Methylcrotonoyl-CoA carboxylase subunit alpha, mitochondrial OS=Homo sapiens GN=MCCC1 PE=1 SV=3;>tr Q68D27      | 5.06E-53  |
| Q96RU3;Q96RU3-2;Q96RI  | FNBP1_HUMAN Formin-binding protein 1 OS=Homo sapiens GN=FNBP1 PE=1 SV=2;>sp Q96RU3-2 FNBP1_HUMAN Isoform 2 of Form         | 5.97E-129 |
| Q96S55;Q96S55-2;Q96S5  | WRIP1_HUMAN ATPase WRNIP1 OS=Homo sapiens GN=WRNIP1 PE=1 SV=2;>sp Q96S55-2 WRIP1_HUMAN Isoform 2 of ATPase WRN             | 5.08E-24  |
| Q96S55;Q96S55-2;Q96S5  | WRIP1_HUMAN ATPase WRNIP1 OS=Homo sapiens GN=WRNIP1 PE=1 SV=2;>sp Q96S55-2 WRIP1_HUMAN Isoform 2 of ATPase WRN             | 3.63E-29  |
| Q96S59;Q96S59-2        | RANB9_HUMAN Ran-binding protein 9 OS=Homo sapiens GN=RANBP9 PE=1 SV=1;>sp Q96S59-2 RANB9_HUMAN Isoform 2 of Ran-b          | 3.72E-87  |
| Q96S97;B4DG42;C9JCO7;  | MYADM_HUMAN Myeloid-associated differentiation marker OS=Homo sapiens GN=MYADM PE=1 SV=2;>tr B4DG42 B4DG42_HUMAN c         | 5.53E-23  |
| Q96ST2;Q96ST2-3;Q96ST  | IWS1_HUMAN Protein IWS1 homolog OS=Homo sapiens GN=IWS1 PE=1 SV=2;>sp Q96ST2-3 IWS1_HUMAN Isoform 3 of Protein IW          | 4.49E-20  |
| Q96T37;Q96T37-3;Q96T3  | RBM15_HUMAN Putative RNA-binding protein 15 OS=Homo sapiens GN=RBM15 PE=1 SV=2;>sp Q96T37-3 RBM15_HUMAN Isoform 3          | 9.13E-10  |
| Q96T51;Q96T51-2;Q96T5  | RUFY1_HUMAN RUN and FYVE domain-containing protein 1 OS=Homo sapiens GN=RUFY1 PE=1 SV=2;>sp Q96T51-2 RUFY1_HUMAN           | 3.82E-53  |
| Q96T60;Q9BUL2          | PNKP_HUMAN Bifunctional polynucleotide phosphatase/kinase OS=Homo sapiens GN=PNKP PE=1 SV=1;>tr Q9BUL2 Q9BUL2_HUMAN        | 3.57E-24  |



Q96TC7;B3KUI4;Q96TC7-:RMD3\_HUMAN Regulator of microtubule dynamics protein 3 OS=Homo sapiens GN=FAM82A2 PE=1 SV=2;>tr|B3KUI4|B3KUI4\_HUMAN 1.44E-16  
 Q99426;Q6FGY5;A8MVD5 TBCB\_HUMAN Tubulin-folding cofactor B OS=Homo sapiens GN=TBCB PE=1 SV=2;>tr|Q6FGY5|Q6FGY5\_HUMAN CKAP1 protein OS=H 1.18E-24  
 Q99447;B7Z4W6;B7ZAS0 PCY2\_HUMAN Ethanolamine-phosphate cytidyltransferase OS=Homo sapiens GN=PCYT2 PE=1 SV=1;>tr|B7Z4W6|B7Z4W6\_HUMAN 4.82E-57  
 Q99471;Q9C083 PFD5\_HUMAN Prefoldin subunit 5 OS=Homo sapiens GN=PFDN5 PE=1 SV=2;>tr|Q9C083|Q9C083\_HUMAN MM-1 gamma OS=Homo s 1.14E-172  
 Q99536;B4DPX4;B3KUF8; VAT1\_HUMAN Synaptic vesicle membrane protein VAT-1 homolog OS=Homo sapiens GN=VAT1 PE=1 SV=2;>tr|B4DPX4|B4DPX4\_HUM 1.12E-233  
 Q99543;Q99543-2 DNJC2\_HUMAN DnaJ homolog subfamily C member 2 OS=Homo sapiens GN=DNAJC2 PE=1 SV=4;>sp|Q99543-2|DNJC2\_HUMAN Isof 2.06E-16  
 Q99584;D3DV53 S10AD\_HUMAN Protein S100-A13 OS=Homo sapiens GN=S100A13 PE=1 SV=1;>tr|D3DV53|D3DV53\_HUMAN S100 calcium binding p 2.92E-21  
 Q99615;Q59EH7;A8K4T2; DNJC7\_HUMAN DnaJ homolog subfamily C member 7 OS=Homo sapiens GN=DNAJC7 PE=1 SV=2;>tr|Q59EH7|Q59EH7\_HUMAN DnaJ 9.04E-176  
 Q99623;B4DP75;B4DW05 PHB2\_HUMAN Prohibitin-2 OS=Homo sapiens GN=PHB2 PE=1 SV=2;>tr|B4DP75|B4DP75\_HUMAN cDNA FLJ56579, highly similar to P 2.03E-95  
 Q99661;Q99661-2;A8K3S KIF2C\_HUMAN Kinesin-like protein KIF2C OS=Homo sapiens GN=KIF2C PE=1 SV=2;>sp|Q99661-2|KIF2C\_HUMAN Isoform 2 of Kines 1.33E-93  
 Q99700;Q99700-4;Q9970 ATX2\_HUMAN Ataxin-2 OS=Homo sapiens GN=ATXN2 PE=1 SV=2;>sp|Q99700-4|ATX2\_HUMAN Isoform 4 of Ataxin-2 OS=Homo sapi 2.94E-23  
 Q99715;Q99715-4;Q9971 COCA1\_HUMAN Collagen alpha-1(XII) chain OS=Homo sapiens GN=COL12A1 PE=1 SV=2;>sp|Q99715-4|COCA1\_HUMAN Isoform 4 o 0  
 Q99805;B3KSG9 TM9S2\_HUMAN Transmembrane 9 superfamily member 2 OS=Homo sapiens GN=TM9SF2 PE=1 SV=1;>tr|B3KSG9|B3KSG9\_HUMAN c 8.47E-18  
 Q99807;Q99807-2 COQ7\_HUMAN Ubiquinone biosynthesis protein COQ7 homolog OS=Homo sapiens GN=COQ7 PE=1 SV=3;>sp|Q99807-2|COQ7\_HUMA 1.53E-06  
 Q99816;Q99816-2;D3DQY TS101\_HUMAN Tumor susceptibility gene 101 protein OS=Homo sapiens GN=TSG101 PE=1 SV=2;>sp|Q99816-2|TS101\_HUMAN Isofo 4.85E-21  
 Q99873;Q99873-2;Q9987 ANM1\_HUMAN Protein arginine N-methyltransferase 1 OS=Homo sapiens GN=PRMT1 PE=1 SV=2;>sp|Q99873-2|ANM1\_HUMAN Isofo 1.85E-218  
 Q9BPX3;Q6NUR1 CND3\_HUMAN Condensin complex subunit 3 OS=Homo sapiens GN=NCAPG PE=1 SV=1;>tr|Q6NUR1|Q6NUR1\_HUMAN Non-SMC conc 1.34E-105  
 Q9BQ39;B4DW97;B4DEDE DDX50\_HUMAN ATP-dependent RNA helicase DDX50 OS=Homo sapiens GN=DDX50 PE=1 SV=1;>tr|B4DW97|B4DW97\_HUMAN cDNA 9.83E-68  
 Q9BQ52;Q9BQ52-2 RNZ2\_HUMAN Zinc phosphodiesterase ELAC protein 2 OS=Homo sapiens GN=ELAC2 PE=1 SV=2;>sp|Q9BQ52-2|RNZ2\_HUMAN Isofor 2.17E-08  
 Q9BQ52;Q9BQ52-3 RNZ2\_HUMAN Zinc phosphodiesterase ELAC protein 2 OS=Homo sapiens GN=ELAC2 PE=1 SV=2;>sp|Q9BQ52-3|RNZ2\_HUMAN Isofor 3.95E-48  
 Q9BQ52;Q9BQ52-3;Q9BQ RNZ2\_HUMAN Zinc phosphodiesterase ELAC protein 2 OS=Homo sapiens GN=ELAC2 PE=1 SV=2;>sp|Q9BQ52-3|RNZ2\_HUMAN Isofor 2.94E-41  
 Q9BQA1;Q5QNY9;B4DP38 MEP50\_HUMAN Methylosome protein 50 OS=Homo sapiens GN=WDR77 PE=1 SV=1;>tr|Q5QNY9|Q5QNY9\_HUMAN WD repeat domair 9.42E-14  
 Q9BQE3;B7Z1K5;Q53GA7 TBA1C\_HUMAN Tubulin alpha-1C chain OS=Homo sapiens GN=TUBA1C PE=1 SV=1;>tr|B7Z1K5|B7Z1K5\_HUMAN cDNA FLJ55956, hig 0  
 Q9BQI0-2;Q9BQI0;Q9BQI 2|AIF1L\_HUMAN Isoform 2 of Allograft inflammatory factor 1-like OS=Homo sapiens GN=AIF1L;>sp|Q9BQI0|AIF1L\_HUMAN Allograft i 9.91E-07  
 Q9BR76;Q9NSK3 COR1B\_HUMAN Coronin-1B OS=Homo sapiens GN=CORO1B PE=1 SV=1;>tr|Q9NSK3|Q9NSK3\_HUMAN Putative uncharacterized prote 4.71E-43  
 Q9BRJ6;C9JQV0 CG050\_HUMAN Uncharacterized protein C7orf50 OS=Homo sapiens GN=C7orf50 PE=1 SV=1;>tr|C9JQV0|C9JQV0\_HUMAN Uncharacte 3.71E-87  
 Q9BRQ8;Q9BRQ8-2 AIFM2\_HUMAN Apoptosis-inducing factor 2 OS=Homo sapiens GN=AIFM2 PE=1 SV=1;>sp|Q9BRQ8-2|AIFM2\_HUMAN Isoform 2 of Ap 3.24E-14  
 Q9BRT2;Q5TAQ0 CF125\_HUMAN Uncharacterized protein C6orf125 OS=Homo sapiens GN=C6orf125 PE=1 SV=1;>tr|Q5TAQ0|Q5TAQ0\_HUMAN OTTHUM 4.93E-30  
 Q9BRX5;Q9BRX5-2 PSF3\_HUMAN DNA replication complex GINS protein PSF3 OS=Homo sapiens GN=GINS3 PE=1 SV=1;>sp|Q9BRX5-2|PSF3\_HUMAN Is 3.86E-09  
 Q9BRX8;A6NDF1 CJ058\_HUMAN UPF0765 protein C10orf58 OS=Homo sapiens GN=C10orf58 PE=1 SV=3;>tr|A6NDF1|A6NDF1\_HUMAN Uncharacterizec 4.82E-56  
 Q9BSH4;Q8N9Q7 TACO1\_HUMAN Translational activator of cytochrome c oxidase 1 OS=Homo sapiens GN=TACO1 PE=1 SV=1;>tr|Q8N9Q7|Q8N9Q7\_HL 6.33E-13  
 Q9BTE1;B4DS97 DCTN5\_HUMAN Dynactin subunit 5 OS=Homo sapiens GN=DCTN5 PE=1 SV=1;>tr|B4DS97|B4DS97\_HUMAN cDNA FLJ57579, highly s 3.06E-06  
 Q9BTT0;Q53F20;Q5TB20; AN32E\_HUMAN Acidic leucine-rich nuclear phosphoprotein 32 family member E OS=Homo sapiens GN=ANP32E PE=1 SV=1;>tr|Q53F2 6.06E-190  
 Q9BTV4;Q8TEP9 TMM43\_HUMAN Transmembrane protein 43 OS=Homo sapiens GN=TMEM43 PE=1 SV=1;>tr|Q8TEP9|Q8TEP9\_HUMAN FLJ00144 prote 8.09E-16  
 Q9BTZ2;Q9BTZ2-4;P0CG2 DHRS4\_HUMAN Dehydrogenase/reductase SDR family member 4 OS=Homo sapiens GN=DHRS4 PE=1 SV=3;>sp|Q9BTZ2-4|DHRS4\_H 2.19E-05  
 Q9BUF5;B4DP54;B3KS31; TBB6\_HUMAN Tubulin beta-6 chain OS=Homo sapiens GN=TUBB6 PE=1 SV=1;>tr|B4DP54|B4DP54\_HUMAN cDNA FLJ52712, highly si 0  
 Q9BUJ2;Q9BUJ2-2;Q9BUJ HNRL1\_HUMAN Heterogeneous nuclear ribonucleoprotein U-like protein 1 OS=Homo sapiens GN=HNRNPUL1 PE=1 SV=2;>sp|Q9BUJ2 3.19E-207  
 Q9BUL8;C9J5C3;C9J6F3;C PDC10\_HUMAN Programmed cell death protein 10 OS=Homo sapiens GN=PDCD10 PE=1 SV=1;>tr|C9J5C3|C9J5C3\_HUMAN Uncharac 2.22E-19  
 Q9BUP0;B4DEE0;Q53SA2; EFHD1\_HUMAN EF-hand domain-containing protein D1 OS=Homo sapiens GN=EFHD1 PE=1 SV=1;>tr|B4DEE0|B4DEE0\_HUMAN cDNA 3.19E-42  
 Q9BUP3-3;Q9BUP3 3|HTAI2\_HUMAN Isoform 3 of Oxidoreductase HTATIP2 OS=Homo sapiens GN=HTATIP2;>sp|Q9BUP3|HTAI2\_HUMAN Oxidoreductase I 6.91E-11  
 Q9BUR5;Q9BUR5-2;C9J57 APOO\_HUMAN Apolipoprotein O OS=Homo sapiens GN=APOO PE=1 SV=1;>sp|Q9BUR5-2|APOO\_HUMAN Isoform 2 of Apolipoprotein 2.31E-27  
 Q9BUT1;Q9BUT1-2 BDH2\_HUMAN 3-hydroxybutyrate dehydrogenase type 2 OS=Homo sapiens GN=BDH2 PE=1 SV=2;>sp|Q9BUT1-2|BDH2\_HUMAN Isof 1.38E-59  
 Q9BV40;C9JXZ5 VAMP8\_HUMAN Vesicle-associated membrane protein 8 OS=Homo sapiens GN=VAMP8 PE=1 SV=1;>tr|C9JXZ5|C9JXZ5\_HUMAN Unchi 4.82E-78  
 Q9BVA1;O43209;B7Z4N1; TBB2B\_HUMAN Tubulin beta-2B chain OS=Homo sapiens GN=TUBB2B PE=1 SV=1;>tr|O43209|O43209\_HUMAN Homo sapiens clone 0  
 Q9BVG4;A6NDF3;Q9P0N4 CX026\_HUMAN UPF0368 protein Cxorf26 OS=Homo sapiens GN=Cxorf26 PE=1 SV=1;>tr|A6NDF3|A6NDF3\_HUMAN Uncharacterized p 1.51E-42  
 Q9BVK6;B2R8A2;B4DPP4 TMED9\_HUMAN Transmembrane emp24 domain-containing protein 9 OS=Homo sapiens GN=TMED9 PE=1 SV=2;>tr|B2R8A2|B2R8A2 1.52E-55  
 Q9BW19;B4E063;B4DMA8 KIFC1\_HUMAN Kinesin-like protein KIFC1 OS=Homo sapiens GN=KIFC1 PE=1 SV=2;>tr|B4E063|B4E063\_HUMAN cDNA FLJ54292, hig 1.18E-42  
 Q9BW27;B4DMQ3;B4DPW NUP85\_HUMAN Nuclear pore complex protein Nup85 OS=Homo sapiens GN=NUP85 PE=1 SV=1;>tr|B4DMQ3|B4DMQ3\_HUMAN cDNA 1.14E-42  
 Q9BWU0;B4DV74 NADAP\_HUMAN Kanadaplin OS=Homo sapiens GN=SLC4A1AP PE=1 SV=1;>tr|B4DV74|B4DV74\_HUMAN cDNA FLJ53855, highly simil 2.05E-14  
 Q9BX40;Q9BX40-2;Q5TBF LS14B\_HUMAN Protein LSM14 homolog B OS=Homo sapiens GN=LSM14B PE=1 SV=1;>sp|Q9BX40-2|LS14B\_HUMAN Isoform 2 of Prc 3.43E-12  
 Q9BX40;Q9BX40-2;Q9BX4 LS14B\_HUMAN Protein LSM14 homolog B OS=Homo sapiens GN=LSM14B PE=1 SV=1;>sp|Q9BX40-2|LS14B\_HUMAN Isoform 2 of Prc 1.47E-33  
 Q9BX68;Q8WYJ5;Q53HJ8 HINT2\_HUMAN Histidine triad nucleotide-binding protein 2, mitochondrial OS=Homo sapiens GN=HINT2 PE=1 SV=1;>tr|Q8WYJ5|Q8W 1.66E-38  
 Q9BXD5;Q9BXD5-2;Q9BX NPL\_HUMAN N-acetylneuraminase lyase OS=Homo sapiens GN=NPL PE=2 SV=1;>sp|Q9BXD5-2|NPL\_HUMAN Isoform 2 of N-acetylne 5.77E-31  
 Q9BXF6;Q2Z1P3 RFIP5\_HUMAN Rab11 family-interacting protein 5 OS=Homo sapiens GN=RAB11FIP5 PE=1 SV=1;>tr|Q2Z1P3|Q2Z1P3\_HUMAN Putati 1.16E-13  
 Q9BXX5;Q9BXX5-2;Q86T6 B2L13\_HUMAN Bcl-2-like protein 13 OS=Homo sapiens GN=BCL2L13 PE=1 SV=1;>sp|Q9BXX5-2|B2L13\_HUMAN Isoform 1 of Bcl-2-lil 4.28E-08  
 Q9BY32;A2A2N2 ITPA\_HUMAN Inosine triphosphate pyrophosphatase OS=Homo sapiens GN=ITPA PE=1 SV=2;>tr|A2A2N2|A2A2N2\_HUMAN Inosine tr 1.32E-67  
 Q9BY50;B4DI03 SC11C\_HUMAN Signal peptidase complex catalytic subunit SEC11C OS=Homo sapiens GN=SEC11C PE=1 SV=3;>tr|B4DI03|B4DI03\_H 1.85E-19  
 Q9BYC9;B7Z746 RM20\_HUMAN 39S ribosomal protein L20, mitochondrial OS=Homo sapiens GN=MRPL20 PE=1 SV=1;>tr|B7Z746|B7Z746\_HUMAN cD 7.25E-18  
 Q9BYD2;Q5SZR1 RM09\_HUMAN 39S ribosomal protein L9, mitochondrial OS=Homo sapiens GN=MRPL9 PE=1 SV=2;>tr|Q5SZR1|Q5SZR1\_HUMAN Mito 6.63E-18  
 Q9BYD6;A0PJ79 RM01\_HUMAN 39S ribosomal protein L1, mitochondrial OS=Homo sapiens GN=MRPL1 PE=1 SV=2;>tr|A0PJ79|A0PJ79\_HUMAN MRPL1 2.01E-43  
 Q9BYG3;C9J808;C9J6C5 MK67I\_HUMAN MKI67 FHA domain-interacting nucleolar phosphoprotein OS=Homo sapiens GN=MKI67IP PE=1 SV=1;>tr|C9J808|C9J 5.88E-22

Q9BYX2;Q9BYX2-2;Q9BYX2|TBD2A\_HUMAN TBC1 domain family member 2A OS=Homo sapiens GN=TBC1D2 PE=1 SV=3;>sp|Q9BYX2-2|TBD2A\_HUMAN Isoform 1.89E-16  
Q9BZE1;A6NHR2;Q6TGK8 RM37\_HUMAN 39S ribosomal protein L37, mitochondrial OS=Homo sapiens GN=MRPL37 PE=1 SV=2;>tr|A6NHR2|A6NHR2\_HUMAN UniProt 9.11E-85  
Q9BZK7;O60907;O60907-TBL1R\_HUMAN F-box-like/WD repeat-containing protein TBL1XR1 OS=Homo sapiens GN=TBL1XR1 PE=1 SV=1;>sp|O60907|TBL1X\_H 5.38E-11  
Q9BZM5;B4DSS7;Q8IZX9 N2DL2\_HUMAN NKG2D ligand 2 OS=Homo sapiens GN=ULBP2 PE=1 SV=1;>tr|B4DSS7|B4DSS7\_HUMAN cDNA FLJ56582, highly simi 3.85E-05  
Q9BZX2;Q9BZX2-2 UCK2\_HUMAN Uridine-cytidine kinase 2 OS=Homo sapiens GN=UCK2 PE=1 SV=1;>sp|Q9BZX2-2|UCK2\_HUMAN Isoform 2 of Uridine- 3.97E-11  
Q9BZZ2;Q9BZZ2-3;Q9BZ:SN\_HUMAN Sialoadhesin OS=Homo sapiens GN=SIGLEC1 PE=1 SV=2;>sp|Q9BZZ2-3|SN\_HUMAN Isoform 3 of Sialoadhesin OS=Hom 4.64E-11  
Q9C0B1;Q9C0B1-2;Q9C0EFTO\_HUMAN Alpha-ketoglutarate-dependent dioxygenase FTO OS=Homo sapiens GN=FTO PE=1 SV=3;>sp|Q9C0B1-2|FTO\_HUMAN Is 2.19E-15  
Q9C0C2;Q9C0C2-2 TB182\_HUMAN 182 kDa tankyrase-1-binding protein OS=Homo sapiens GN=TNKS1BP1 PE=1 SV=4;>sp|Q9C0C2-2|TB182\_HUMAN Is 8.96E-154  
Q9GZR7;Q4V9L5;B4DKV2 DDX24\_HUMAN ATP-dependent RNA helicase DDX24 OS=Homo sapiens GN=DDX24 PE=1 SV=1;>tr|Q4V9L5|Q4V9L5\_HUMAN DDX24 7.34E-28  
Q9GZS1;Q9GZS1-2;B4E0(RPA49\_HUMAN DNA-directed RNA polymerase I subunit RPA49 OS=Homo sapiens GN=POLR1E PE=1 SV=2;>sp|Q9GZS1-2|RPA49\_HL 1.41E-13  
Q9GZT8;Q9GZT8-2;Q658|NIF3L\_HUMAN NIF3-like protein 1 OS=Homo sapiens GN=NIF3L1 PE=1 SV=2;>sp|Q9GZT8-2|NIF3L\_HUMAN Isoform 2 of NIF3-like pr 2.22E-18  
Q9GZU8;Q2VIL1;A8MQ36.F192A\_HUMAN Protein FAM192A OS=Homo sapiens GN=FAM192A PE=1 SV=1;>tr|Q2VIL1|Q2VIL1\_HUMAN RcnIP30 (Fragment) OS= 1.58E-06  
Q9H078;Q9H078-2;B4DXF|CLPB\_HUMAN Caseinolytic peptidase B protein homolog OS=Homo sapiens GN=CLPB PE=1 SV=1;>sp|Q9H078-2|CLPB\_HUMAN Isofor 5.20E-36  
Q9H0A8;Q9H0A8-2;B4DEI|COMD4\_HUMAN COMM domain-containing protein 4 OS=Homo sapiens GN=COMMD4 PE=1 SV=1;>sp|Q9H0A8-2|COMD4\_HUMAN Iso 9.43E-21  
Q9H0B6;A8MXL7;A8MZ87 KLC2\_HUMAN Kinesin light chain 2 OS=Homo sapiens GN=KLC2 PE=1 SV=1;>tr|A8MXL7|A8MXL7\_HUMAN Uncharacterized protein O 5.13E-80  
Q9H0P0;Q9H0P0-2;Q9H0F|5NT3\_HUMAN Cytosolic 5-nucleotidase 3 OS=Homo sapiens GN=NT5C3 PE=1 SV=3;>sp|Q9H0P0-2|5NT3\_HUMAN Isoform 3 of Cytos 4.75E-14  
Q9H0S4;Q9H4E3;Q53GJ1;DDX47\_HUMAN Probable ATP-dependent RNA helicase DDX47 OS=Homo sapiens GN=DDX47 PE=1 SV=1;>tr|Q9H4E3|Q9H4E3\_HUMA 1.08E-30  
Q9H0U4;Q6FIG4;Q92928 RAB1B\_HUMAN Ras-related protein Rab-1B OS=Homo sapiens GN=RAB1B PE=1 SV=1;>tr|Q6FIG4|Q6FIG4\_HUMAN RAB1B protein O 5.23E-249  
Q9H0U4;Q92928 RAB1B\_HUMAN Ras-related protein Rab-1B OS=Homo sapiens GN=RAB1B PE=1 SV=1;>sp|Q92928|RAB1C\_HUMAN Putative Ras-rela 0  
Q9H0W9;Q9H0W9-2;Q9H(CK054\_HUMAN Ester hydrolase C11orf54 OS=Homo sapiens GN=C11orf54 PE=1 SV=1;>sp|Q9H0W9-2|CK054\_HUMAN Isoform 2 of E 2.07E-53  
Q9H147;C9J7R7;C9J4E2;C|TDIF1\_HUMAN Deoxynucleotidyltransferase terminal-interacting protein 1 OS=Homo sapiens GN=DNTTIP1 PE=1 SV=2;>tr|C9J7R7|C 1.42E-20  
Q9H1C4;Q05BS6;Q58F16 UN93B\_HUMAN Protein unc-93 homolog B1 OS=Homo sapiens GN=UNC93B1 PE=1 SV=2;>tr|Q05BS6|Q05BS6\_HUMAN UNC93B1 pro 3.36E-06  
Q9H201;Q9H201-2;D6REL|EPN3\_HUMAN Epsin-3 OS=Homo sapiens GN=EPN3 PE=1 SV=1;>sp|Q9H201-2|EPN3\_HUMAN Isoform 2 of Epsin-3 OS=Homo sapien: 9.28E-11  
Q9H2G2-2;Q9H2G2 2|SLK\_HUMAN Isoform 2 of STE20-like serine/threonine-protein kinase OS=Homo sapiens GN=SLK;>sp|Q9H2G2|SLK\_HUMAN STE20- 6.70E-114  
Q9H2H8-2;Q9H2H8;B8ZZ:2|PPIL3\_HUMAN Isoform 2 of Peptidyl-prolyl cis-trans isomerase-like 3 OS=Homo sapiens GN=PPIL3;>sp|Q9H2H8|PPIL3\_HUMAN Pepi 3.57E-24  
Q9H2J4;B7Z6S0 PDCL3\_HUMAN Phosducin-like protein 3 OS=Homo sapiens GN=PDCL3 PE=1 SV=1;>tr|B7Z6S0|B7Z6S0\_HUMAN cDNA FLJ51322, higl 5.12E-28  
Q9H2U1;Q9H2U1-3;Q9H2|DHX36\_HUMAN Probable ATP-dependent RNA helicase DHX36 OS=Homo sapiens GN=DHX36 PE=1 SV=2;>sp|Q9H2U1-3|DHX36\_HUM 1.88E-17  
Q9H2U2-2;Q9H2U2;Q9H2|IPYR2\_HUMAN Isoform 2 of Inorganic pyrophosphatase 2, mitochondrial OS=Homo sapiens GN=PPA2;>sp|Q9H2U2|IPYR2\_HUMAN I 1.39E-82  
Q9H330;Q9H330-2;Q9H3:CI005\_HUMAN Transmembrane protein C9orf5 OS=Homo sapiens GN=C9orf5 PE=1 SV=2;>sp|Q9H330-2|CI005\_HUMAN Isoform 2 of 8.47E-09  
Q9H3N1;B4DZX7 TMX1\_HUMAN Thioredoxin-related transmembrane protein 1 OS=Homo sapiens GN=TMX1 PE=1 SV=1;>tr|B4DZX7|B4DZX7\_HUMAN 1.77E-52  
Q9H3P2;Q9H3P2-7 NELFA\_HUMAN Negative elongation factor A OS=Homo sapiens GN=WHSC2 PE=1 SV=3;>sp|Q9H3P2-7|NELFA\_HUMAN Isoform 2 of N 5.74E-14  
Q9H3S7;B4DJ12;B4DST5;PTN23\_HUMAN Tyrosine-protein phosphatase non-receptor type 23 OS=Homo sapiens GN=PTPN23 PE=1 SV=1;>tr|B4DJ12|B4DJ12\_H 2.62E-35  
Q9H3U1;Q9H3U1-2 UN45A\_HUMAN Protein unc-45 homolog A OS=Homo sapiens GN=UNC45A PE=1 SV=1;>sp|Q9H3U1-2|UN45A\_HUMAN Isoform 2 of P 7.51E-10  
Q9H446;A8MT24 RWDD1\_HUMAN RWD domain-containing protein 1 OS=Homo sapiens GN=RWDD1 PE=1 SV=1;>tr|A8MT24|A8MT24\_HUMAN RWD do 1.94E-07  
Q9H477;B4DV96 RBSK\_HUMAN Ribokinase OS=Homo sapiens GN=RBKS PE=1 SV=1;>tr|B4DV96|B4DV96\_HUMAN cDNA FLJ60169, highly similar to R 9.91E-07  
Q9H479;B4DH12 FN3K\_HUMAN Fructosamine-3-kinase OS=Homo sapiens GN=FN3K PE=1 SV=1;>tr|B4DH12|B4DH12\_HUMAN cDNA FLJ60514, highly 4.96E-13  
Q9H4A3-6;Q9H4A3-5;Q9F6|WNK1\_HUMAN Isoform 5 of Serine/threonine-protein kinase WNK1 OS=Homo sapiens GN=WNK1;>sp|Q9H4A3-5|WNK1\_HUMAN Isc 3.63E-23  
Q9H4A4;Q7RU04;A6NKB8 AMPB\_HUMAN Aminopeptidase B OS=Homo sapiens GN=RNPEP PE=1 SV=2;>tr|Q7RU04|Q7RU04\_HUMAN Aminopeptidase B OS=Hor 4.47E-174  
Q9H4A6;B4DWL6;B3KQ71 GOLP3\_HUMAN Golgi phosphoprotein 3 OS=Homo sapiens GN=GOLPH3 PE=1 SV=1;>tr|B4DWL6|B4DWL6\_HUMAN cDNA FLJ55806, h 2.00E-26  
Q9H6S3;B7ZKL3;Q9H6S3-ES8L2\_HUMAN Epidermal growth factor receptor kinase substrate 8-like protein 2 OS=Homo sapiens GN=EPS8L2 PE=1 SV=2;>tr|B7Z 1.80E-173  
Q9H6S3;Q9H6S3-2 ES8L2\_HUMAN Epidermal growth factor receptor kinase substrate 8-like protein 2 OS=Homo sapiens GN=EPS8L2 PE=1 SV=2;>sp|Q9 5.03E-144  
Q9H6T3;Q9H6T3-2;B4DR|RPAP3\_HUMAN RNA polymerase II-associated protein 3 OS=Homo sapiens GN=RPAP3 PE=1 SV=2;>sp|Q9H6T3-2|RPAP3\_HUMAN Isof 2.09E-12  
Q9H6Z4;Q9H6Z4-2;Q9H6:RANB3\_HUMAN Ran-binding protein 3 OS=Homo sapiens GN=RANBP3 PE=1 SV=1;>sp|Q9H6Z4-2|RANB3\_HUMAN Isoform 2 of Ran-b 1.45E-20  
Q9H6Z4;Q9H6Z4-2;Q9H6:RANB3\_HUMAN Ran-binding protein 3 OS=Homo sapiens GN=RANBP3 PE=1 SV=1;>sp|Q9H6Z4-2|RANB3\_HUMAN Isoform 2 of Ran-b 1.37E-16  
Q9H7C9;C9JH31;Q9H7C9-CK067\_HUMAN UPF0366 protein C11orf67 OS=Homo sapiens GN=C11orf67 PE=1 SV=1;>tr|C9JH31|C9JH31\_HUMAN Uncharacterized 1.66E-06  
Q9H7D7;Q9H7D7-2;B4DR|WDR26\_HUMAN WD repeat-containing protein 26 OS=Homo sapiens GN=WDR26 PE=1 SV=3;>sp|Q9H7D7-2|WDR26\_HUMAN Isoform 2.13E-40  
Q9H832;Q9H832-2 UBE2Z\_HUMAN Ubiquitin-conjugating enzyme E2 Z OS=Homo sapiens GN=UBE2Z PE=1 SV=2;>sp|Q9H832-2|UBE2Z\_HUMAN Isoform 1.42E-09  
Q9H8H3;B4DDW1 MET7A\_HUMAN Methyltransferase-like protein 7A OS=Homo sapiens GN=METTL7A PE=1 SV=1;>tr|B4DDW1|B4DDW1\_HUMAN cDNA I 5.14E-65  
Q9H8U3;E2QRF5;Q5JVV6 ZFAN3\_HUMAN AN1-type zinc finger protein 3 OS=Homo sapiens GN=ZFAND3 PE=1 SV=1;>tr|E2QRF5|E2QRF5\_HUMAN Uncharacteri 7.11E-06  
Q9H8Y8;Q9H8Y8-2 GORS2\_HUMAN Golgi reassembly-stacking protein 2 OS=Homo sapiens GN=GORASP2 PE=1 SV=3;>sp|Q9H8Y8-2|GORS2\_HUMAN Isc 1.39E-159  
Q9H900;Q9H900-2 ZWILC\_HUMAN Protein zwilch homolog OS=Homo sapiens GN=ZWILCH PE=1 SV=2;>sp|Q9H900-2|ZWILC\_HUMAN Isoform 2 of Prote 6.18E-07  
Q9H936;C9J1H6 GHC1\_HUMAN Mitochondrial glutamate carrier 1 OS=Homo sapiens GN=SLC25A22 PE=1 SV=1;>tr|C9J1H6|C9J1H6\_HUMAN Uncharac 1.98E-13  
Q9H944;B3KUJ9;B7ZBQ3 MED20\_HUMAN Mediator of RNA polymerase II transcription subunit 20 OS=Homo sapiens GN=MED20 PE=1 SV=1;>tr|B3KUJ9|B3KU. 5.21E-39  
Q9H974;B7Z472;B7Z5R2 QTRD1\_HUMAN Queuine tRNA-ribosyltransferase subunit QTRTD1 OS=Homo sapiens GN=QTRTD1 PE=1 SV=1;>tr|B7Z472|B7Z472\_H 2.33E-08  
Q9H9Q2;Q9H9Q2-3;Q9H9 CSN7B\_HUMAN COP9 signalosome complex subunit 7b OS=Homo sapiens GN=COPS7B PE=1 SV=1;>sp|Q9H9Q2-3|CSN7B\_HUMAN Is 3.99E-31  
Q9H9S4;Q5TAW7;B7ZBJ4 CB39L\_HUMAN Calcium-binding protein 39-like OS=Homo sapiens GN=CAB39L PE=1 SV=3;>tr|Q5TAW7|Q5TAW7\_HUMAN Calcium bii 2.95E-07  
Q9HAB8;Q5VVM0 PPCS\_HUMAN Phosphopantothenate--cysteine ligase OS=Homo sapiens GN=PPCS PE=1 SV=2;>tr|Q5VVM0|Q5VVM0\_HUMAN Phosphc 2.32E-15  
Q9HAV7;B4DWV5 GRPE1\_HUMAN GrpE protein homolog 1, mitochondrial OS=Homo sapiens GN=GRPEL1 PE=1 SV=2;>tr|B4DWV5|B4DWV5\_HUMAN Gr 2.14E-167  
Q9HB40;Q9HB40-2 RISC\_HUMAN Retinoid-inducible serine carboxypeptidase OS=Homo sapiens GN=SCPEP1 PE=1 SV=1;>sp|Q9HB40-2|RISC\_HUMAN Is 3.06E-15  
Q9HB90;Q9NQL2;Q9NQL2|RRAGC\_HUMAN Ras-related GTP-binding protein C OS=Homo sapiens GN=RRAGC PE=1 SV=1;>sp|Q9NQL2|RRAGD\_HUMAN Ras-relat 1.50E-05  
Q9HC38-2;Q9HC38;Q9HC.2|GLOD4\_HUMAN Isoform 2 of Glyoxalase domain-containing protein 4 OS=Homo sapiens GN=GLOD4;>sp|Q9HC38|GLOD4\_HUMAN C 1.87E-164

Q9HCC0;Q9HCC0-2 MCCB\_HUMAN Methylcrotonoyl-CoA carboxylase beta chain, mitochondrial OS=Homo sapiens GN=MCCC2 PE=1 SV=1;>sp|Q9HCC0-2 8.33E-82  
 Q9HCF4-3;Q9HCF4;Q9HCF4|AL017\_HUMAN Isoform 3 of Protein ALO17 OS=Homo sapiens GN=KIAA1618;>sp|Q9HCF4|AL017\_HUMAN Protein ALO17 OS=Hom 5.18E-24  
 Q9HD33;Q9HD33-2;Q9HD33-2|RM47\_HUMAN 39S ribosomal protein L47, mitochondrial OS=Homo sapiens GN=MRPL47 PE=1 SV=2;>sp|Q9HD33-2|RM47\_HUMAN Is 2.01E-15  
 Q9HD42;B4DXN3 CHM1A\_HUMAN Charged multivesicular body protein 1a OS=Homo sapiens GN=CHMP1A PE=1 SV=1;>tr|B4DXN3|B4DXN3\_HUMAN c 1.09E-13  
 Q9HDC9;Q9HDC9-2 APMAP\_HUMAN Adipocyte plasma membrane-associated protein OS=Homo sapiens GN=APMAP PE=1 SV=2;>sp|Q9HDC9-2|APMAP\_H 1.03E-45  
 Q9NNW7;Q9NNW7-2;Q9N TRXR2\_HUMAN Thioredoxin reductase 2, mitochondrial OS=Homo sapiens GN=TXNRD2 PE=1 SV=3;>sp|Q9NNW7-2|TRXR2\_HUMAN I 7.78E-17  
 Q9NP77;Q9NP77-2 SSU72\_HUMAN RNA polymerase II subunit A C-terminal domain phosphatase SSU72 OS=Homo sapiens GN=SSU72 PE=1 SV=1;>sp|( 2.59E-07  
 Q9NP97;Q8TF09;Q9NP97-DLRB1\_HUMAN Dynein light chain roadblock-type 1 OS=Homo sapiens GN=DYNLRB1 PE=1 SV=3;>sp|Q8TF09|DLRB2\_HUMAN Dynein 3.86E-06  
 Q9NPH2;Q9NPH2-2 INO1\_HUMAN Inositol-3-phosphate synthase 1 OS=Homo sapiens GN=ISYNA1 PE=1 SV=1;>sp|Q9NPH2-2|INO1\_HUMAN Isoform 2 of 1.05E-100  
 Q9NPJ6;Q5T911;B4DX67 MED4\_HUMAN Mediator of RNA polymerase II transcription subunit 4 OS=Homo sapiens GN=MED4 PE=1 SV=1;>tr|Q5T911|Q5T911\_ 3.78E-07  
 Q9NQ29;Q9NQ29-3;Q9NQ LUC7L\_HUMAN Putative RNA-binding protein Luc7-like 1 OS=Homo sapiens GN=LUC7L PE=1 SV=1;>sp|Q9NQ29-3|LUC7L\_HUMAN Isc 1.83E-57  
 Q9NQ48;B3KSI9;B4E0K7 LZTL1\_HUMAN Leucine zipper transcription factor-like protein 1 OS=Homo sapiens GN=LZTFL1 PE=1 SV=1;>tr|B3KSI9|B3KSI9\_HUM 5.59E-127  
 Q9NQC3;Q9NQC3-5;Q9N RTN4\_HUMAN Reticulon-4 OS=Homo sapiens GN=RTN4 PE=1 SV=2;>sp|Q9NQC3-5|RTN4\_HUMAN Isoform 5 of Reticulon-4 OS=Hom 6.49E-220  
 Q9NQC3;Q9NQC3-5;Q9N RTN4\_HUMAN Reticulon-4 OS=Homo sapiens GN=RTN4 PE=1 SV=2;>sp|Q9NQC3-5|RTN4\_HUMAN Isoform 5 of Reticulon-4 OS=Hom 4.30E-89  
 Q9NQG5;A2A2M0 RPR1B\_HUMAN Regulation of nuclear pre-mRNA domain-containing protein 1B OS=Homo sapiens GN=RPRD1B PE=1 SV=1;>tr|A2A2M 5.87E-121  
 Q9NQW6;Q9NQW6-2;A8K ANLN\_HUMAN Actin-binding protein anillin OS=Homo sapiens GN=ANLN PE=1 SV=2;>sp|Q9NQW6-2|ANLN\_HUMAN Isoform 2 of Actin 1.91E-46  
 Q9NR12;Q9NR12-2;Q9NR PDLI7\_HUMAN PDZ and LIM domain protein 7 OS=Homo sapiens GN=PDLIM7 PE=1 SV=1;>sp|Q9NR12-2|PDLI7\_HUMAN Isoform 2 of 7.91E-23  
 Q9NR56;Q96P92;Q5VZF2;MBNL1\_HUMAN Muscleblind-like protein 1 OS=Homo sapiens GN=MBNL1 PE=1 SV=2;>tr|Q96P92|Q96P92\_HUMAN MBNL protein OS= 2.09E-18  
 Q9NR56;Q9NR56-2;Q9NR MBNL1\_HUMAN Muscleblind-like protein 1 OS=Homo sapiens GN=MBNL1 PE=1 SV=2;>sp|Q9NR56-2|MBNL1\_HUMAN Isoform 2 of Mu 2.63E-17  
 Q9NRX4;Q6FIE5;B1AMX0 PHP14\_HUMAN 14 kDa phosphohistidine phosphatase OS=Homo sapiens GN=PHPT1 PE=1 SV=1;>tr|Q6FIE5|Q6FIE5\_HUMAN PHP14 p 8.83E-96  
 Q9NRX4;Q9NRX4-2 PHP14\_HUMAN 14 kDa phosphohistidine phosphatase OS=Homo sapiens GN=PHPT1 PE=1 SV=1;>sp|Q9NRX4-2|PHP14\_HUMAN Isofo 4.37E-15  
 Q9NRY5;B4E1J2;B4DQT0 F1142\_HUMAN Protein FAM114A2 OS=Homo sapiens GN=FAM114A2 PE=1 SV=4;>tr|B4E1J2|B4E1J2\_HUMAN cDNA FLJ54229 OS=Ho 1.77E-22  
 Q9NSD9;Q9BR63;A8K666 SYFB\_HUMAN Phenylalanyl-tRNA synthetase beta chain OS=Homo sapiens GN=FARSB PE=1 SV=3;>tr|Q9BR63|Q9BR63\_HUMAN FAR 1.12E-123  
 Q9NSE4;A8K5W7 SYIM\_HUMAN Isoleucyl-tRNA synthetase, mitochondrial OS=Homo sapiens GN=IARS2 PE=1 SV=2;>tr|A8K5W7|A8K5W7\_HUMAN cDN 4.95E-75  
 Q9NSI2;Q9NSI2-2;C9JJU7 CU070\_HUMAN Uncharacterized protein C21orf70 OS=Homo sapiens GN=C21orf70 PE=1 SV=2;>sp|Q9NSI2-2|CU070\_HUMAN Isoform 3.16E-10  
 Q9NTJ5;B4DK71;B4DVV3;SAC1\_HUMAN Phosphatidylinositol phosphatase SAC1 OS=Homo sapiens GN=SACM1L PE=1 SV=2;>tr|B4DK71|B4DK71\_HUMAN cDN 8.99E-10  
 Q9NTK5;Q9NTK5-2;Q9NTI OLA1\_HUMAN Obg-like ATPase 1 OS=Homo sapiens GN=OLA1 PE=1 SV=2;>sp|Q9NTK5-2|OLA1\_HUMAN Isoform 2 of Obg-like ATPase 3.09E-203  
 Q9NTX5;Q9NTX5-2;Q9NZ ECHD1\_HUMAN Enoyl-CoA hydratase domain-containing protein 1 OS=Homo sapiens GN=ECHDC1 PE=1 SV=2;>sp|Q9NTX5-2|ECHD1 6.89E-41  
 Q9NUI1;Q9NUI1-3 DECR2\_HUMAN Peroxisomal 2,4-dienoyl-CoA reductase OS=Homo sapiens GN=DECR2 PE=1 SV=1;>sp|Q9NUI1-3|DECR2\_HUMAN Isc 1.09E-08  
 Q9NUQ7;B3KRI4 UFSP2\_HUMAN Ufm1-specific protease 2 OS=Homo sapiens GN=UFSP2 PE=2 SV=3;>tr|B3KRI4|B3KRI4\_HUMAN cDNA FLJ34316 fis, c 7.31E-22  
 Q9NUQ8;Q9NUQ8-2;B4DR ABCF3\_HUMAN ATP-binding cassette sub-family F member 3 OS=Homo sapiens GN=ABCF3 PE=1 SV=2;>sp|Q9NUQ8-2|ABCF3\_HUMA 7.83E-73  
 Q9NUQ9;Q68D08 FA49B\_HUMAN Protein FAM49B OS=Homo sapiens GN=FAM49B PE=1 SV=1;>tr|Q68D08|Q68D08\_HUMAN Putative uncharacterized pi 1.37E-84  
 Q9NUV9;B4DWA5;B4DWN GIMA4\_HUMAN GTPase IMAP family member 4 OS=Homo sapiens GN=GIMAP4 PE=1 SV=1;>tr|B4DWA5|B4DWA5\_HUMAN cDNA FLJ5 1.53E-91  
 Q9NUY8;Q9NUY8-2 TBC23\_HUMAN TBC1 domain family member 23 OS=Homo sapiens GN=TBC1D23 PE=1 SV=3;>sp|Q9NUY8-2|TBC23\_HUMAN Isoform 6.76E-16  
 Q9NVA1;Q9NVA1-2;Q9NV UQCC\_HUMAN Ubiquinol-cytochrome c reductase complex chaperone CBP3 homolog OS=Homo sapiens GN=UQCC PE=1 SV=3;>sp|Q 1.16E-13  
 Q9NVA1;Q9NVA1-4;Q9NV UQCC\_HUMAN Ubiquinol-cytochrome c reductase complex chaperone CBP3 homolog OS=Homo sapiens GN=UQCC PE=1 SV=3;>sp|Q 1.19E-35  
 Q9NVA2-2;Q9NVA2 2|SEP11\_HUMAN Isoform 2 of Septin-11 OS=Homo sapiens GN=SEPT11;>sp|Q9NVA2|SEP11\_HUMAN Septin-11 OS=Homo sapiens G 4.37E-296  
 Q9NVI7-2;Q9NVI7;Q5T9A 2|ATD3A\_HUMAN Isoform 2 of ATPase family AAA domain-containing protein 3A OS=Homo sapiens GN=ATAD3A;>sp|Q9NVI7|ATD3A\_ 6.07E-37  
 Q9NVJ2;Q96BM9 ARL8B\_HUMAN ADP-ribosylation factor-like protein 8B OS=Homo sapiens GN=ARL8B PE=1 SV=1;>sp|Q96BM9|ARL8A\_HUMAN ADP-ri 2.62E-17  
 Q9NVN8;A8MX10;Q05DU1 GNL3L\_HUMAN Guanine nucleotide-binding protein-like 3-like protein OS=Homo sapiens GN=GNL3L PE=1 SV=1;>tr|A8MX10|A8MX10 3.24E-05  
 Q9NVP1;Q4ZG72;Q8N254 DDX18\_HUMAN ATP-dependent RNA helicase DDX18 OS=Homo sapiens GN=DDX18 PE=1 SV=2;>tr|Q4ZG72|Q4ZG72\_HUMAN Putativ 6.69E-45  
 Q9NVU7;Q9NVU7-2 SDA1\_HUMAN Protein SDA1 homolog OS=Homo sapiens GN=SDAD1 PE=1 SV=3;>sp|Q9NVU7-2|SDA1\_HUMAN Isoform 2 of Protein S 1.79E-16  
 Q9NVV4-2;Q9NVV4 2|PAPD1\_HUMAN Isoform 2 of Poly(A) RNA polymerase, mitochondrial OS=Homo sapiens GN=MTPAP;>sp|Q9NVV4|PAPD1\_HUMAN Po 9.17E-08  
 Q9NVX0;Q9NVX0-3;Q9NV HAUS2\_HUMAN HAUS augmin-like complex subunit 2 OS=Homo sapiens GN=HAUS2 PE=1 SV=1;>sp|Q9NVX0-3|HAUS2\_HUMAN Isof 4.38E-06  
 Q9NW64;Q9NW64-2 RBM22\_HUMAN Pre-mRNA-splicing factor RBM22 OS=Homo sapiens GN=RBM22 PE=1 SV=1;>sp|Q9NW64-2|RBM22\_HUMAN Isoform 9.60E-08  
 Q9NWS0;B4DGN7 PIHD1\_HUMAN PIH1 domain-containing protein 1 OS=Homo sapiens GN=PIH1D1 PE=1 SV=1;>tr|B4DGN7|B4DGN7\_HUMAN cDNA FL 1.58E-05  
 Q9NWS8;Q9NWS8-2;Q5S RMND1\_HUMAN Required for meiotic nuclear division protein 1 homolog OS=Homo sapiens GN=RMND1 PE=1 SV=2;>sp|Q9NWS8-2|F 2.70E-07  
 Q9NWU5;Q9NWU5-2 RM22\_HUMAN 39S ribosomal protein L22, mitochondrial OS=Homo sapiens GN=MRPL22 PE=1 SV=1;>sp|Q9NWU5-2|RM22\_HUMAN I 1.96E-07  
 Q9NWW4;D3DQ38 CA123\_HUMAN UPF0587 protein C1orf123 OS=Homo sapiens GN=C1orf123 PE=1 SV=1;>tr|D3DQ38|D3DQ38\_HUMAN Chromosome 3.27E-15  
 Q9NX24;D6RCB9;D6RC52 NHP2\_HUMAN H/ACA ribonucleoprotein complex subunit 2 OS=Homo sapiens GN=NHP2 PE=1 SV=1;>tr|D6RCB9|D6RCB9\_HUMAN Ur 1.40E-49  
 Q9NX40;Q9NX40-2;Q9NX OCAD1\_HUMAN OCIA domain-containing protein 1 OS=Homo sapiens GN=OCIAD1 PE=1 SV=1;>sp|Q9NX40-2|OCAD1\_HUMAN Isofor 2.85E-47  
 Q9NX46;B4DHSV ARHL2\_HUMAN Poly(ADP-ribose) glycohydrolase ARH3 OS=Homo sapiens GN=ADPRHL2 PE=1 SV=1;>tr|B4DHSV|B4DHSV\_HUMAN c 9.77E-55  
 Q9NX55;Q9NX55-3 HYPK\_HUMAN Huntingtin-interacting protein K OS=Homo sapiens GN=HYPK PE=1 SV=2;>sp|Q9NX55-3|HYPK\_HUMAN Isoform 3 of H 6.90E-09  
 Q9NXF1;B4DYV2;B4DQR0 TEX10\_HUMAN Testis-expressed sequence 10 protein OS=Homo sapiens GN=TEX10 PE=1 SV=2;>tr|B4DYV2|B4DYV2\_HUMAN cDNA F 3.69E-05  
 Q9NXR7-1;Q9NXR7;Q9NX 1|BRE\_HUMAN Isoform 1 of BRCA1-A complex subunit BRE OS=Homo sapiens GN=BRE;>sp|Q9NXR7|BRE\_HUMAN BRCA1-A complex 1.31E-20  
 Q9NXV6;B3KTW3 CARF\_HUMAN CDKN2A-interacting protein OS=Homo sapiens GN=CDKN2AIP PE=1 SV=2;>tr|B3KTW3|B3KTW3\_HUMAN cDNA FLJ388 1.10E-66  
 Q9NY12;Q9NY12-2;D6RCL GAR1\_HUMAN H/ACA ribonucleoprotein complex subunit 1 OS=Homo sapiens GN=GAR1 PE=1 SV=1;>sp|Q9NY12-2|GAR1\_HUMAN Is 5.78E-11  
 Q9NY27;Q9NY27-3;Q9NY PP4R2\_HUMAN Serine/threonine-protein phosphatase 4 regulatory subunit 2 OS=Homo sapiens GN=PPP4R2 PE=1 SV=3;>sp|Q9NY27 2.39E-37  
 Q9NYB9;Q9NYB9-4;Q9NY ABI2\_HUMAN Abl interactor 2 OS=Homo sapiens GN=ABI2 PE=1 SV=1;>sp|Q9NYB9-4|ABI2\_HUMAN Isoform 4 of Abl interactor 2 OS 1.06E-07  
 Q9NYL2-2;Q9NYL2;Q9NYL 2|MLTK\_HUMAN Isoform 2 of Mitogen-activated protein kinase kinase kinase MLT OS=Homo sapiens GN=MLTK;>sp|Q9NYL2|MLTK\_HU 7.24E-10  
 Q9NYL4;B4DWB7;Q86SR8 FKB11\_HUMAN Peptidyl-prolyl cis-trans isomerase FKBP11 OS=Homo sapiens GN=FKBP11 PE=1 SV=1;>tr|B4DWB7|B4DWB7\_HUMAN 8.70E-07

Q9NYU2;Q9NYU2-2 UGGG1\_HUMAN UDP-glucose:glycoprotein glucosyltransferase 1 OS=Homo sapiens GN=UGGT1 PE=1 SV=3;>sp|Q9NYU2-2|UGGG1\_H 0  
 Q9NZ08-2;Q9NZ08;A8K6f2|ERAP1\_HUMAN Isoform 2 of Endoplasmic reticulum aminopeptidase 1 OS=Homo sapiens GN=ERAP1;>sp|Q9NZ08|ERAP1\_HUMAN E 4.26E-53  
 Q9NZ63;Q6GVN4;Q9P0Q6 CI078\_HUMAN Uncharacterized protein C9orf78 OS=Homo sapiens GN=C9orf78 PE=1 SV=1;>tr|Q6GVN4|Q6GVN4\_HUMAN Hepatocel 7.63E-10  
 Q9NZJ9;Q9NZJ9-2;Q8NFP NUDT4\_HUMAN Diphosphoinositol polyphosphate phosphohydrolase 2 OS=Homo sapiens GN=NUDT4 PE=1 SV=2;>sp|Q9NZJ9-2|NUD 4.36E-07  
 Q9NZL9;Q9NZL9-2;Q9NZL MAT2B\_HUMAN Methionine adenosyltransferase 2 subunit beta OS=Homo sapiens GN=MAT2B PE=1 SV=1;>sp|Q9NZL9-2|MAT2B\_HUI 2.62E-67  
 Q9NZM1;Q9NZM1-6;Q9NZ MYOF\_HUMAN Myoferlin OS=Homo sapiens GN=MYOF PE=1 SV=1;>sp|Q9NZM1-6|MYOF\_HUMAN Isoform 6 of Myoferlin OS=Homo sa 0  
 Q9NZN4;B4DLA1;Q8NJC3;EHD2\_HUMAN EH domain-containing protein 2 OS=Homo sapiens GN=EHD2 PE=1 SV=2;>tr|B4DLA1|B4DLA1\_HUMAN cDNA FLJ5345 3.56E-144  
 Q9NZT2;Q9NZT2-2 OGFR\_HUMAN Opioid growth factor receptor OS=Homo sapiens GN=OGFR PE=1 SV=3;>sp|Q9NZT2-2|OGFR\_HUMAN Isoform 2 of Op 3.70E-79  
 Q9NZU5;B4DG80;B4DEY6 LMCD1\_HUMAN LIM and cysteine-rich domains protein 1 OS=Homo sapiens GN=LMCD1 PE=1 SV=1;>tr|B4DG80|B4DG80\_HUMAN cD 2.10E-36  
 Q9NZZ3;B4DIR6 CHMP5\_HUMAN Charged multivesicular body protein 5 OS=Homo sapiens GN=CHMP5 PE=1 SV=1;>tr|B4DIR6|B4DIR6\_HUMAN cDNA 4.58E-29  
 Q9P0K7-2;Q9P0K7;Q9P0K2|RAI14\_HUMAN Isoform 2 of Ankycorbin OS=Homo sapiens GN=RAI14;>sp|Q9P0K7|RAI14\_HUMAN Ankycorbin OS=Homo sapiens G 1.89E-32  
 Q9P0L0-2;Q9P0L0 2|VAPA\_HUMAN Isoform 2 of Vesicle-associated membrane protein-associated protein A OS=Homo sapiens GN=VAPA;>sp|Q9P0L0|VA 1.65E-91  
 Q9P0M9;D6RB99;D6RAN8 RM27\_HUMAN 39S ribosomal protein L27, mitochondrial OS=Homo sapiens GN=MRPL27 PE=1 SV=1;>tr|D6RB99|D6RB99\_HUMAN Ur 2.12E-08  
 Q9P258;A5PLK7 RCC2\_HUMAN Protein RCC2 OS=Homo sapiens GN=RCC2 PE=1 SV=2;>tr|A5PLK7|A5PLK7\_HUMAN RCC2 protein (Fragment) OS=Hor 6.69E-82  
 Q9P287-2;Q9P287;Q9P282|BCCIP\_HUMAN Isoform 2 of BRCA2 and CDKN1A-interacting protein OS=Homo sapiens GN=BCCIP;>sp|Q9P287|BCCIP\_HUMAN BRC 1.41E-86  
 Q9P289;Q9P289-3 MST4\_HUMAN Serine/threonine-protein kinase MST4 OS=Homo sapiens GN=MST4 PE=1 SV=2;>sp|Q9P289-3|MST4\_HUMAN Isoform 4.10E-63  
 Q9P2I0;B3KN45;B3KMI0 CPSF2\_HUMAN Cleavage and polyadenylation specificity factor subunit 2 OS=Homo sapiens GN=CPSF2 PE=1 SV=2;>tr|B3KN45|B3KN 3.02E-27  
 Q9P2N5;B3KY61;Q05DK9 RBM27\_HUMAN RNA-binding protein 27 OS=Homo sapiens GN=RBM27 PE=1 SV=2;>tr|B3KY61|B3KY61\_HUMAN cDNA FLJ16787 fis, ( 4.61E-07  
 Q9P2W9;D6RF48;D6RD65 STX18\_HUMAN Syntaxin-18 OS=Homo sapiens GN=STX18 PE=1 SV=1;>tr|D6RF48|D6RF48\_HUMAN Uncharacterized protein OS=Hor 8.62E-07  
 Q9TQE0;P13761 2B19\_HUMAN HLA class II histocompatibility antigen, DRB1-9 beta chain OS=Homo sapiens GN=HLA-DRB1 PE=1 SV=1;>sp|P13761|; 7.13E-78  
 Q9UBB4;B4DG05;Q7Z524 ATX10\_HUMAN Ataxin-10 OS=Homo sapiens GN=ATXN10 PE=1 SV=1;>tr|B4DG05|B4DG05\_HUMAN cDNA FLJ54600, highly similar to 6.02E-162  
 Q9UBB6-3;Q9UBB6;Q9UB3|NCDN\_HUMAN Isoform 3 of Neurochondrin OS=Homo sapiens GN=NCDN;>sp|Q9UBB6|NCDN\_HUMAN Neurochondrin OS=Homo sa; 1.27E-08  
 Q9UBE0;B3KMQ2;B3KNJ4 SAE1\_HUMAN SUMO-activating enzyme subunit 1 OS=Homo sapiens GN=SAE1 PE=1 SV=1;>tr|B3KMQ2|B3KMQ2\_HUMAN cDNA FLJ1 4.30E-52  
 Q9UBF2;Q9H9B7;B3KND4 COPG2\_HUMAN Coatamer subunit gamma-2 OS=Homo sapiens GN=COPG2 PE=1 SV=1;>tr|Q9H9B7|Q9H9B7\_HUMAN cDNA FLJ1287. 1.03E-102  
 Q9UBK9;B1AJQ0 UXT\_HUMAN Protein UXT OS=Homo sapiens GN=UXT PE=1 SV=1;>tr|B1AJQ0|B1AJQ0\_HUMAN Ubiquitously-expressed transcript OS= 3.69E-14  
 Q9UBQ0-2;Q9UBQ0;Q5JPF2|VPS29\_HUMAN Isoform 2 of Vacuolar protein sorting-associated protein 29 OS=Homo sapiens GN=VPS29;>sp|Q9UBQ0|VPS29\_HUM 5.01E-22  
 Q9UBQ5;B7ZAM9;B4DVD7 EIF3K\_HUMAN Eukaryotic translation initiation factor 3 subunit K OS=Homo sapiens GN=EIF3K PE=1 SV=1;>tr|B7ZAM9|B7ZAM9\_HUI 3.75E-193  
 Q9UBR2;Q5U000 CATZ\_HUMAN Cathepsin Z OS=Homo sapiens GN=CTSZ PE=1 SV=1;>tr|Q5U000|Q5U000\_HUMAN Cathepsin Z OS=Homo sapiens PE 3.77E-30  
 Q9UBS4;B3KW63 DJB11\_HUMAN DnaJ homolog subfamily B member 11 OS=Homo sapiens GN=DNAJB11 PE=1 SV=1;>tr|B3KW63|B3KW63\_HUMAN cD 5.84E-60  
 Q9UBU9;Q9UBU9-2 NXF1\_HUMAN Nuclear RNA export factor 1 OS=Homo sapiens GN=NXF1 PE=1 SV=1;>sp|Q9UBU9-2|NXF1\_HUMAN Isoform 2 of Nucle 3.78E-98  
 Q9UDY2;Q9UDY2-3;Q9UD ZO2\_HUMAN Tight junction protein ZO-2 OS=Homo sapiens GN=TJP2 PE=1 SV=2;>sp|Q9UDY2-3|ZO2\_HUMAN Isoform C1 of Tight ju 1.94E-288  
 Q9UET6;Q9UET6-2 RRMJ1\_HUMAN Putative ribosomal RNA methyltransferase 1 OS=Homo sapiens GN=FTSJ1 PE=1 SV=2;>sp|Q9UET6-2|RRMJ1\_HUMAN 3.44E-12  
 Q9UEW8;Q6E0B2 STK39\_HUMAN STE20/SPS1-related proline-alanine-rich protein kinase OS=Homo sapiens GN=STK39 PE=1 SV=3;>tr|Q6E0B2|Q6E0E 4.10E-26  
 Q9UFN0;B4DW81 NPS3A\_HUMAN Protein NipSnap homolog 3A OS=Homo sapiens GN=NIPSNAP3A PE=1 SV=2;>tr|B4DW81|B4DW81\_HUMAN cDNA FLJ 8.66E-33  
 Q9UGM6;B7Z6G7;B7Z5X7 SYWM\_HUMAN Tryptophanyl-tRNA synthetase, mitochondrial OS=Homo sapiens GN=WARS2 PE=1 SV=1;>tr|B7Z6G7|B7Z6G7\_HUMA 2.29E-10  
 Q9UH65;D3DQV1;B3KUB9 SWP70\_HUMAN Switch-associated protein 70 OS=Homo sapiens GN=SWAP70 PE=1 SV=1;>tr|D3DQV1|D3DQV1\_HUMAN SWAP-70 pr 1.82E-72  
 Q9UHB9;Q9UHB9-2 SRP68\_HUMAN Signal recognition particle 68 kDa protein OS=Homo sapiens GN=SRP68 PE=1 SV=2;>sp|Q9UHB9-2|SRP68\_HUMAN I 4.25E-63  
 Q9UHD9;B4DZF1;B4DM19 UBQL2\_HUMAN Ubiquilin-2 OS=Homo sapiens GN=UBQLN2 PE=1 SV=2;>tr|B4DZF1|B4DZF1\_HUMAN cDNA FLJ56541, highly similar to 1.03E-59  
 Q9UHG3;B7Z8A2;B7Z9P8;PCYOX\_HUMAN Prenylcysteine oxidase 1 OS=Homo sapiens GN=PCYOX1 PE=1 SV=3;>tr|B7Z8A2|B7Z8A2\_HUMAN cDNA FLJ51671, h 3.64E-88  
 Q9UHL4;Q59EM4 DPP2\_HUMAN Dipeptidyl peptidase 2 OS=Homo sapiens GN=DPP7 PE=1 SV=3;>tr|Q59EM4|Q59EM4\_HUMAN Dipeptidyl-peptidase II 1.37E-39  
 Q9UHW5-2;Q9UHW5 2|GPN3\_HUMAN Isoform 2 of GPN-loop GTPase 3 OS=Homo sapiens GN=GPN3;>sp|Q9UHW5|GPN3\_HUMAN GPN-loop GTPase 3 OS=I 4.82E-08  
 Q9UHY7;Q7Z508;D6RA00 ENOPH\_HUMAN Enolase-phosphatase E1 OS=Homo sapiens GN=ENOPH1 PE=1 SV=1;>tr|Q7Z508|Q7Z508\_HUMAN MasA OS=Homo s 8.30E-16  
 Q9UHY7;Q9UHY7-2 ENOPH\_HUMAN Enolase-phosphatase E1 OS=Homo sapiens GN=ENOPH1 PE=1 SV=1;>sp|Q9UHY7-2|ENOPH\_HUMAN Isoform 2 of En 1.75E-08  
 Q9UI08-2;Q9UI08;B4DW52|EVL\_HUMAN Isoform 1 of Ena/VASP-like protein OS=Homo sapiens GN=EVL;>sp|Q9UI08|EVL\_HUMAN Ena/VASP-like protein OS=H 2.46E-109  
 Q9UI09;Q53HG1 NDUAC\_HUMAN NADH dehydrogenase [ubiquinone] 1 alpha subcomplex subunit 12 OS=Homo sapiens GN=NDUFA12 PE=1 SV=1;>tr| 2.42E-16  
 Q9UJU6;Q9UJU6-3;Q9UJU DBNL\_HUMAN Drebrin-like protein OS=Homo sapiens GN=DBNL PE=1 SV=1;>sp|Q9UJU6-3|DBNL\_HUMAN Isoform 3 of Drebrin-like p 1.97E-250  
 Q9UJX3;Q9UJX3-2 APC7\_HUMAN Anaphase-promoting complex subunit 7 OS=Homo sapiens GN=ANAPC7 PE=1 SV=4;>sp|Q9UJX3-2|APC7\_HUMAN Isof 2.03E-12  
 Q9UKX2;P12882 MYH2\_HUMAN Myosin-2 OS=Homo sapiens GN=MYH2 PE=1 SV=1;>sp|P12882|MYH1\_HUMAN Myosin-1 OS=Homo sapiens GN=MYH1 3.85E-09  
 Q9UKX2;P12882;P11055;MYH2\_HUMAN Myosin-2 OS=Homo sapiens GN=MYH2 PE=1 SV=1;>sp|P12882|MYH1\_HUMAN Myosin-1 OS=Homo sapiens GN=MYH1 2.11E-23  
 Q9UKX7;Q9UKX7-2 NUP50\_HUMAN Nuclear pore complex protein Nup50 OS=Homo sapiens GN=NUP50 PE=1 SV=2;>sp|Q9UKX7-2|NUP50\_HUMAN Isofo 5.91E-36  
 Q9UKY7;Q9UKY7-2;Q9UK CDV3\_HUMAN Protein CDV3 homolog OS=Homo sapiens GN=CDV3 PE=1 SV=1;>sp|Q9UKY7-2|CDV3\_HUMAN Isoform 2 of Protein CC 1.18E-10  
 Q9UKZ1;B3KNB0 CB029\_HUMAN UPF0760 protein C2orf29 OS=Homo sapiens GN=C2orf29 PE=1 SV=1;>tr|B3KNB0|B3KNB0\_HUMAN cDNA FLJ14159 f 2.80E-08  
 Q9UL15-2;Q9UL15 2|BAG5\_HUMAN Isoform 2 of BAG family molecular chaperone regulator 5 OS=Homo sapiens GN=BAG5;>sp|Q9UL15|BAG5\_HUMAN E 9.92E-16  
 Q9UL33;Q9UL33-2;C9JDE TPC2L\_HUMAN Trafficking protein particle complex subunit 2-like protein OS=Homo sapiens GN=TRAPPC2L PE=1 SV=1;>sp|Q9UL33-2 1.98E-05  
 Q9ULC4;Q9ULC4-3;Q9ULC MCTS1\_HUMAN Malignant T cell-amplified sequence 1 OS=Homo sapiens GN=MCTS1 PE=1 SV=1;>sp|Q9ULC4-3|MCTS1\_HUMAN Isof 7.85E-135  
 Q9ULV0;Q9H6Y6;B4DXH5;MYO5B\_HUMAN Myosin-Vb OS=Homo sapiens GN=MYO5B PE=1 SV=3;>tr|Q9H6Y6|Q9H6Y6\_HUMAN cDNA: FLJ21683 fis, clone COL0 8.48E-10  
 Q9ULX9;B4DV49 MAFF\_HUMAN Transcription factor Maff OS=Homo sapiens GN=MAFF PE=1 SV=2;>tr|B4DV49|B4DV49\_HUMAN cDNA FLJ57607, highl 4.01E-05  
 Q9ULZ3;Q9ULZ3-3;Q9ULZ ASC\_HUMAN Apoptosis-associated speck-like protein containing a CARD OS=Homo sapiens GN=PYCARD PE=1 SV=2;>sp|Q9ULZ3-3|A 1.41E-27  
 Q9UM00;Q9UM00-2 TMCO1\_HUMAN Transmembrane and coiled-coil domain-containing protein 1 OS=Homo sapiens GN=TMCO1 PE=1 SV=1;>sp|Q9UM00 3.12E-12  
 Q9UM54;Q9UM54-1;Q9UM MYO6\_HUMAN Myosin-VI OS=Homo sapiens GN=MYO6 PE=1 SV=4;>sp|Q9UM54-1|MYO6\_HUMAN Isoform 1 of Myosin-VI OS=Homo 3.16E-141  
 Q9UMS0;Q9UMS0-3;Q9UM NFU1\_HUMAN NFU1 iron-sulfur cluster scaffold homolog, mitochondrial OS=Homo sapiens GN=NFU1 PE=1 SV=2;>sp|Q9UMS0-3|NFU 5.40E-06



|                             |             |                                                                                                                                                                                                                                                 |           |
|-----------------------------|-------------|-------------------------------------------------------------------------------------------------------------------------------------------------------------------------------------------------------------------------------------------------|-----------|
| Q9UMY4;Q9UMY4-2             | SNX12_HUMAN | Sorting nexin-12 OS=Homo sapiens GN=SNX12 PE=1 SV=3;>sp Q9UMY4-2 SNX12_HUMAN Isoform 2 of Sorting nexin-12 OS=Homo sapiens GN=SNX12 PE=1 SV=3                                                                                                   | 1.40E-14  |
| Q9UN36;Q9UN36-3;Q9UN36-3    | NDRG2_HUMAN | Protein NDRG2 OS=Homo sapiens GN=NDRG2 PE=1 SV=2;>sp Q9UN36-3 NDRG2_HUMAN Isoform 3 of Protein NDRG2 OS=Homo sapiens GN=NDRG2 PE=1 SV=2                                                                                                         | 5.89E-10  |
| Q9UN37;Q9UF30;Q9NXX5        | VPS4A_HUMAN | Vacuolar protein sorting-associated protein 4A OS=Homo sapiens GN=VPS4A PE=1 SV=1;>tr Q9UF30 Q9UF30_HUMAN Isoform 1 of VPS4A OS=Homo sapiens GN=VPS4A PE=1 SV=1                                                                                 | 2.86E-13  |
| Q9UN86;Q9UN86-2             | G3BP2_HUMAN | Ras GTPase-activating protein-binding protein 2 OS=Homo sapiens GN=G3BP2 PE=1 SV=2;>sp Q9UN86-2 G3BP2_HUMAN Isoform 2 of G3BP2 OS=Homo sapiens GN=G3BP2 PE=1 SV=2                                                                               | 3.94E-76  |
| Q9UNF0;Q9UNF0-2             | PACN2_HUMAN | Protein kinase C and casein kinase substrate in neurons protein 2 OS=Homo sapiens GN=PACN2 PE=1 SV=2;>sp Q9UNF0-2 PACN2_HUMAN Isoform 2 of Protein kinase C and casein kinase substrate in neurons protein 2 OS=Homo sapiens GN=PACN2 PE=1 SV=2 | 1.17E-24  |
| Q9UNF1;Q9UNF1-2             | MAGD2_HUMAN | Melanoma-associated antigen D2 OS=Homo sapiens GN=MAGD2 PE=1 SV=2;>sp Q9UNF1-2 MAGD2_HUMAN Isoform 2 of Melanoma-associated antigen D2 OS=Homo sapiens GN=MAGD2 PE=1 SV=2                                                                       | 6.77E-107 |
| Q9UNQ2;A8K9K8;B4DRY2        | DIMT1_HUMAN | Probable dimethyladenosine transferase OS=Homo sapiens GN=DIMT1L PE=1 SV=1;>tr A8K9K8 A8K9K8_HUMAN cDNA FLJ11839 fis, clone MGC117267                                                                                                           | 5.07E-33  |
| Q9UN52;B4DY81;B4DN01        | CSN3_HUMAN  | COP9 signalosome complex subunit 3 OS=Homo sapiens GN=COPS3 PE=1 SV=3;>tr B4DY81 B4DY81_HUMAN cDNA FLJ11839 fis, clone MGC117267                                                                                                                | 1.40E-64  |
| Q9UNZ2-5;Q9UNZ2;Q9UN5       | NSF1C_HUMAN | Isoform 3 of NSFL1 cofactor p47 OS=Homo sapiens GN=NSFL1C;>sp Q9UNZ2 NSF1C_HUMAN NSFL1 cofactor p47 OS=Homo sapiens GN=NSFL1C                                                                                                                   | 9.26E-28  |
| Q9UP83-2;Q9UP83-3;Q9UP83-3  | COG5_HUMAN  | Isoform 2 of Conserved oligomeric Golgi complex subunit 5 OS=Homo sapiens GN=COG5;>sp Q9UP83-3 COG5_HUMAN Isoform 2 of Conserved oligomeric Golgi complex subunit 5 OS=Homo sapiens GN=COG5                                                     | 2.16E-08  |
| Q9UPN3;Q9UPN3-4             | MACF1_HUMAN | Microtubule-actin cross-linking factor 1, isoforms 1/2/3/5 OS=Homo sapiens GN=MACF1 PE=1 SV=4;>sp Q9UPN3-4 MACF1_HUMAN Isoform 4 of Microtubule-actin cross-linking factor 1, isoforms 1/2/3/5 OS=Homo sapiens GN=MACF1 PE=1 SV=4               | 0         |
| Q9UPN7;B4DLT9               | PP6R1_HUMAN | Serine/threonine-protein phosphatase 6 regulatory subunit 1 OS=Homo sapiens GN=PPP6R1 PE=1 SV=5;>tr B4DLT9 PP6R1_HUMAN Isoform 1 of Serine/threonine-protein phosphatase 6 regulatory subunit 1 OS=Homo sapiens GN=PPP6R1 PE=1 SV=5             | 1.54E-08  |
| Q9UPT5;Q9UPT5-6;Q9UPT5-6    | EXOC7_HUMAN | Exocyst complex component 7 OS=Homo sapiens GN=EXOC7 PE=1 SV=3;>sp Q9UPT5-6 EXOC7_HUMAN Isoform 6 of Exocyst complex component 7 OS=Homo sapiens GN=EXOC7 PE=1 SV=3                                                                             | 1.31E-10  |
| Q9UQ35;Q9UQ35-2;Q9UQ35-2    | SRRM2_HUMAN | Serine/arginine repetitive matrix protein 2 OS=Homo sapiens GN=SRRM2 PE=1 SV=2;>sp Q9UQ35-2 SRRM2_HUMAN Isoform 2 of Serine/arginine repetitive matrix protein 2 OS=Homo sapiens GN=SRRM2 PE=1 SV=2                                             | 1.99E-08  |
| Q9UQ80;Q6PIN5;A8K6Y1;PA2G4  | PA2G4_HUMAN | Proliferation-associated protein 2G4 OS=Homo sapiens GN=PA2G4 PE=1 SV=3;>tr Q6PIN5 Q6PIN5_HUMAN PA2G4 protein OS=Homo sapiens GN=PA2G4 PE=1 SV=3                                                                                                | 0         |
| Q9Y221;Q9Y221-2             | NIP7_HUMAN  | 60S ribosome subunit biogenesis protein NIP7 homolog OS=Homo sapiens GN=NIP7 PE=1 SV=1;>sp Q9Y221-2 NIP7_HUMAN Isoform 2 of 60S ribosome subunit biogenesis protein NIP7 homolog OS=Homo sapiens GN=NIP7 PE=1 SV=1                              | 8.09E-11  |
| Q9Y230;B3KNL2;B3KQ59        | RUVB2_HUMAN | RuvB-like 2 OS=Homo sapiens GN=RUVB2L PE=1 SV=3;>tr B3KNL2 B3KNL2_HUMAN RuvB-like 2 (E. coli), isoform C1 OS=Homo sapiens GN=RUVB2L PE=1 SV=3                                                                                                   | 2.81E-291 |
| Q9Y237-2;Q9Y237;Q5HYV2      | PIN4_HUMAN  | Isoform 2 of Peptidyl-prolyl cis-trans isomerase NIMA-interacting 4 OS=Homo sapiens GN=PIN4;>sp Q9Y237 PIN4_HUMAN Isoform 2 of Peptidyl-prolyl cis-trans isomerase NIMA-interacting 4 OS=Homo sapiens GN=PIN4                                   | 3.15E-74  |
| Q9Y266;Q9H2R7               | NUDC_HUMAN  | Nuclear migration protein nudC OS=Homo sapiens GN=NUDC PE=1 SV=1;>tr Q9H2R7 Q9H2R7_HUMAN NPDP011 OS=Homo sapiens GN=NUDC PE=1 SV=1                                                                                                              | 0         |
| Q9Y295;Q9UFA5               | DRG1_HUMAN  | Developmentally-regulated GTP-binding protein 1 OS=Homo sapiens GN=DRG1 PE=1 SV=1;>tr Q9UFA5 Q9UFA5_HUMAN Isoform 1 of Developmentally-regulated GTP-binding protein 1 OS=Homo sapiens GN=DRG1 PE=1 SV=1                                        | 2.88E-107 |
| Q9Y2A7-2;Q9Y2A7;B3KMK2      | NCKP1_HUMAN | Isoform 2 of Nck-associated protein 1 OS=Homo sapiens GN=NCKAP1;>sp Q9Y2A7 NCKP1_HUMAN Nck-associated protein 1 OS=Homo sapiens GN=NCKAP1                                                                                                       | 7.27E-12  |
| Q9Y2D5-4;Q9Y2D5-7;Q9Y2D5-7  | AKAP2_HUMAN | Isoform 2 of A-kinase anchor protein 2 OS=Homo sapiens GN=AKAP2;>sp Q9Y2D5-7 AKAP2_HUMAN Isoform 5 of A-kinase anchor protein 2 OS=Homo sapiens GN=AKAP2                                                                                        | 5.48E-27  |
| Q9Y2H0;Q9Y2H0-1;Q9Y2H0-1    | DLGP4_HUMAN | Disks large-associated protein 4 OS=Homo sapiens GN=DLGAP4 PE=1 SV=3;>sp Q9Y2H0-1 DLGP4_HUMAN Isoform 1 of Disks large-associated protein 4 OS=Homo sapiens GN=DLGAP4 PE=1 SV=3                                                                 | 1.34E-12  |
| Q9Y2J8;B4DIU3;Q96DA7        | PADI2_HUMAN | Protein-arginine deiminase type-2 OS=Homo sapiens GN=PADI2 PE=1 SV=2;>tr B4DIU3 B4DIU3_HUMAN cDNA FLJ61076 fis, clone MGC117267                                                                                                                 | 5.14E-72  |
| Q9Y2K3;B3KP05;REV_Q6MYH15   | MYH15_HUMAN | Myosin-15 OS=Homo sapiens GN=MYH15 PE=1 SV=5;>tr B3KP05 B3KP05_HUMAN cDNA FLJ30874 fis, clone FEBRA2                                                                                                                                            | 1.41E-06  |
| Q9Y2Q3-2;Q9Y2Q3;Q9Y2C2      | GSTK1_HUMAN | Isoform 2 of Glutathione S-transferase kappa 1 OS=Homo sapiens GN=GSTK1;>sp Q9Y2Q3 GSTK1_HUMAN Glutathione S-transferase kappa 1 OS=Homo sapiens GN=GSTK1                                                                                       | 4.90E-101 |
| Q9Y2R4;Q59H21;A8MTP9;DDX52  | DDX52_HUMAN | Probable ATP-dependent RNA helicase DDX52 OS=Homo sapiens GN=DDX52 PE=1 SV=3;>tr Q59H21 Q59H21_HUMAN cDNA FLJ11839 fis, clone MGC117267                                                                                                         | 6.84E-08  |
| Q9Y2S7;B4DEM9               | PDIP2_HUMAN | Polymerase delta-interacting protein 2 OS=Homo sapiens GN=POLDIP2 PE=1 SV=1;>tr B4DEM9 B4DEM9_HUMAN cDNA FLJ11839 fis, clone MGC117267                                                                                                          | 2.24E-32  |
| Q9Y2T2;B4DRN6;Q8NDP0        | AP3M1_HUMAN | AP-3 complex subunit mu-1 OS=Homo sapiens GN=AP3M1 PE=1 SV=1;>tr B4DRN6 B4DRN6_HUMAN cDNA FLJ51284 fis, clone MGC117267                                                                                                                         | 4.36E-38  |
| Q9Y2X3;B3KN82               | NOP58_HUMAN | Nucleolar protein 58 OS=Homo sapiens GN=NOP58 PE=1 SV=1;>tr B3KN82 B3KN82_HUMAN cDNA FLJ13913 fis, clone MGC117267                                                                                                                              | 5.51E-152 |
| Q9Y365;B3KTJ1               | PCTL_HUMAN  | PCTP-like protein OS=Homo sapiens GN=STARD10 PE=2 SV=2;>tr B3KTJ1 B3KTJ1_HUMAN cDNA FLJ38349 fis, clone MGC117267                                                                                                                               | 3.54E-48  |
| Q9Y371-2;Q9Y371;B4E18       | SHLB1_HUMAN | Isoform 2 of Endophilin-B1 OS=Homo sapiens GN=SH3GLB1;>sp Q9Y371 SHLB1_HUMAN Endophilin-B1 OS=Homo sapiens GN=SH3GLB1                                                                                                                           | 2.01E-23  |
| Q9Y388;Q9Y6G0;Q0VGM7        | RBMX2_HUMAN | RNA-binding motif protein, X-linked 2 OS=Homo sapiens GN=RBMX2 PE=1 SV=2;>tr Q9Y6G0 Q9Y6G0_HUMAN RNA-binding motif protein, X-linked 2 OS=Homo sapiens GN=RBMX2                                                                                 | 4.36E-07  |
| Q9Y399;Q5T8A0               | RT02_HUMAN  | 28S ribosomal protein S2, mitochondrial OS=Homo sapiens GN=MRPS2 PE=1 SV=1;>tr Q5T8A0 Q5T8A0_HUMAN Mitochondrial 28S ribosomal protein S2, mitochondrial OS=Homo sapiens GN=MRPS2 PE=1 SV=1                                                     | 1.15E-16  |
| Q9Y3A3;Q9Y3A3-3;Q9Y3A3-3    | MOBL3_HUMAN | Mps one binder kinase activator-like 3 OS=Homo sapiens GN=MOBKL3 PE=1 SV=1;>sp Q9Y3A3-3 MOBL3_HUMAN Isoform 3 of Mps one binder kinase activator-like 3 OS=Homo sapiens GN=MOBKL3 PE=1 SV=1                                                     | 5.05E-10  |
| Q9Y3B9;A8K201               | RRP15_HUMAN | RRP15-like protein OS=Homo sapiens GN=RRP15 PE=1 SV=2;>tr A8K201 A8K201_HUMAN cDNA FLJ75605, highly similar to RRP15 OS=Homo sapiens GN=RRP15                                                                                                   | 6.74E-08  |
| Q9Y3C4;Q9Y3C4-3;Q9Y3C4-3    | TPRKB_HUMAN | TP53RK-binding protein OS=Homo sapiens GN=TPRKB PE=1 SV=1;>sp Q9Y3C4-3 TPRKB_HUMAN Isoform 3 of TP53RK-binding protein OS=Homo sapiens GN=TPRKB PE=1 SV=1                                                                                       | 5.39E-12  |
| Q9Y3D3;B4E032;A6ND22        | RT16_HUMAN  | 28S ribosomal protein S16, mitochondrial OS=Homo sapiens GN=MRPS16 PE=1 SV=1;>tr B4E032 B4E032_HUMAN cDNA FLJ11839 fis, clone MGC117267                                                                                                         | 6.84E-17  |
| Q9Y3D8;Q9Y3D8-2             | KAD6_HUMAN  | Adenylate kinase isoenzyme 6 OS=Homo sapiens GN=TAF9 PE=1 SV=1;>sp Q9Y3D8-2 KAD6_HUMAN Isoform 3 of Adenylate kinase isoenzyme 6 OS=Homo sapiens GN=TAF9 PE=1 SV=1                                                                              | 6.37E-12  |
| Q9Y3D8;Q9Y3D8-2;D6RDI       | KAD6_HUMAN  | Adenylate kinase isoenzyme 6 OS=Homo sapiens GN=TAF9 PE=1 SV=1;>sp Q9Y3D8-2 KAD6_HUMAN Isoform 3 of Adenylate kinase isoenzyme 6 OS=Homo sapiens GN=TAF9 PE=1 SV=1                                                                              | 1.85E-08  |
| Q9Y3L3;Q9Y3L3-2             | 3BP1_HUMAN  | SH3 domain-binding protein 1 OS=Homo sapiens GN=SH3BP1 PE=1 SV=3;>sp Q9Y3L3-2 3BP1_HUMAN Isoform 2 of SH3 domain-binding protein 1 OS=Homo sapiens GN=SH3BP1 PE=1 SV=3                                                                          | 1.61E-16  |
| Q9Y3Q3;Q9UMB6               | TMED3_HUMAN | Transmembrane emp24 domain-containing protein 3 OS=Homo sapiens GN=TMED3 PE=2 SV=1;>tr Q9UMB6 Q9UMB6_HUMAN Isoform 1 of Transmembrane emp24 domain-containing protein 3 OS=Homo sapiens GN=TMED3 PE=2 SV=1                                      | 1.11E-05  |
| Q9Y448;Q9Y448-2             | T4AF1_HUMAN | Putative TRAF4-associated factor 1 OS=Homo sapiens GN=TRAF4AF1 PE=1 SV=2;>sp Q9Y448-2 T4AF1_HUMAN Isoform 2 of Putative TRAF4-associated factor 1 OS=Homo sapiens GN=TRAF4AF1 PE=1 SV=2                                                         | 4.00E-14  |
| Q9Y448;Q9Y448-2;Q9Y448-2    | T4AF1_HUMAN | Putative TRAF4-associated factor 1 OS=Homo sapiens GN=TRAF4AF1 PE=1 SV=2;>sp Q9Y448-2 T4AF1_HUMAN Isoform 2 of Putative TRAF4-associated factor 1 OS=Homo sapiens GN=TRAF4AF1 PE=1 SV=2                                                         | 1.81E-15  |
| Q9Y490;Q5TCU6               | TLN1_HUMAN  | Talin-1 OS=Homo sapiens GN=TLN1 PE=1 SV=3;>tr Q5TCU6 Q5TCU6_HUMAN Talin 1 OS=Homo sapiens GN=TLN1 PE=1 SV=3                                                                                                                                     | 0         |
| Q9Y4F1-2;Q9Y4F1;C9JME2      | FARP1_HUMAN | Isoform 2 of FERM, RhoGEF and pleckstrin domain-containing protein 1 OS=Homo sapiens GN=FARP1;>sp Q9Y4F1-2 FARP1_HUMAN Isoform 2 of FERM, RhoGEF and pleckstrin domain-containing protein 1 OS=Homo sapiens GN=FARP1                            | 1.66E-06  |
| Q9Y4I1-3;Q9Y4I1;Q9Y4I1      | MYO5A_HUMAN | Isoform 3 of Myosin-Va OS=Homo sapiens GN=MYO5A;>sp Q9Y4I1 MYO5A_HUMAN Myosin-Va OS=Homo sapiens GN=MYO5A                                                                                                                                       | 6.46E-07  |
| Q9Y4Y9;B8ZZF8               | LSM5_HUMAN  | U6 snRNA-associated Sm-like protein LSM5 OS=Homo sapiens GN=LSM5 PE=1 SV=3;>tr B8ZZF8 B8ZZF8_HUMAN Unclassified protein OS=Homo sapiens GN=LSM5 PE=1 SV=3                                                                                       | 2.13E-05  |
| Q9Y4Y9;Q9Y4Y9-2             | LSM5_HUMAN  | U6 snRNA-associated Sm-like protein LSM5 OS=Homo sapiens GN=LSM5 PE=1 SV=3;>sp Q9Y4Y9-2 LSM5_HUMAN Unclassified protein OS=Homo sapiens GN=LSM5 PE=1 SV=3                                                                                       | 1.32E-74  |
| Q9Y530;C9JNE2;C9JXC3;C9JXC3 | CF130_HUMAN | Uncharacterized protein C6orf130 OS=Homo sapiens GN=C6orf130 PE=1 SV=2;>tr C9JNE2 C9JNE2_HUMAN Uncharacterized protein C6orf130 OS=Homo sapiens GN=C6orf130                                                                                     | 4.89E-17  |
| Q9Y536;A2BFH1               | PAL4A_HUMAN | Peptidylprolyl cis-trans isomerase A-like 4A/B/C OS=Homo sapiens GN=PPIAL4A PE=1 SV=1;>sp A2BFH1 PAL4A_HUMAN Isoform 1 of Peptidylprolyl cis-trans isomerase A-like 4A/B/C OS=Homo sapiens GN=PPIAL4A PE=1 SV=1                                 | 2.19E-15  |
| Q9Y570;Q9Y570-2;Q9Y570-2    | PPME1_HUMAN | Protein phosphatase methylesterase 1 OS=Homo sapiens GN=PPME1 PE=1 SV=3;>sp Q9Y570-2 PPME1_HUMAN Isoform 2 of Protein phosphatase methylesterase 1 OS=Homo sapiens GN=PPME1 PE=1 SV=3                                                           | 2.02E-16  |
| Q9Y5B8;Q9Y5B8-2             | NDK7_HUMAN  | Nucleoside diphosphate kinase 7 OS=Homo sapiens GN=NME7 PE=1 SV=1;>sp Q9Y5B8-2 NDK7_HUMAN Isoform 2 of Nucleoside diphosphate kinase 7 OS=Homo sapiens GN=NME7 PE=1 SV=1                                                                        | 4.16E-18  |
| Q9Y613;B4DVN5               | FHOD1_HUMAN | FH1/FH2 domain-containing protein 1 OS=Homo sapiens GN=FHOD1 PE=1 SV=3;>tr B4DVN5 B4DVN5_HUMAN cDNA FLJ11839 fis, clone MGC117267                                                                                                               | 3.95E-06  |
| Q9Y623;P11055;Q9UKX3        | MYH4_HUMAN  | Myosin-4 OS=Homo sapiens GN=MYH4 PE=1 SV=2;>sp P11055 MYH3_HUMAN Myosin-3 OS=Homo sapiens GN=MYH3                                                                                                                                               | 3.37E-09  |
| Q9Y623;Q9UKX2;P12882        | MYH4_HUMAN  | Myosin-4 OS=Homo sapiens GN=MYH4 PE=1 SV=2;>sp Q9UKX2 MYH2_HUMAN Myosin-2 OS=Homo sapiens GN=MYH2                                                                                                                                               | 8.78E-10  |
| Q9Y625;O75487               | GPC6_HUMAN  | Glypican-6 OS=Homo sapiens GN=GPC6 PE=2 SV=1;>sp O75487 GPC4_HUMAN Glypican-4 OS=Homo sapiens GN=GPC4                                                                                                                                           | 6.08E-07  |
| Q9Y639;Q9Y639-5;Q9Y639-5    | NPTN_HUMAN  | Neuroplastin OS=Homo sapiens GN=NPTN PE=1 SV=2;>sp Q9Y639-5 NPTN_HUMAN Isoform 5 of Neuroplastin OS=Homo sapiens GN=NPTN PE=1 SV=2                                                                                                              | 5.50E-15  |
| Q9Y639;Q9Y639-5;Q9Y639-5    | NPTN_HUMAN  | Neuroplastin OS=Homo sapiens GN=NPTN PE=1 SV=2;>sp Q9Y639-5 NPTN_HUMAN Isoform 5 of Neuroplastin OS=Homo sapiens GN=NPTN PE=1 SV=2                                                                                                              | 5.74E-16  |
| Q9Y657;Q5JUX0               | SPIN1_HUMAN | Spindlin-1 OS=Homo sapiens GN=SPIN1 PE=1 SV=3;>sp Q5JUX0 SPIN3_HUMAN Spindlin-3 OS=Homo sapiens GN=SPIN3                                                                                                                                        | 1.05E-07  |
| Q9Y680;Q9Y680-2;Q9Y680-2    | FKBP7_HUMAN | Peptidyl-prolyl cis-trans isomerase FKBP7 OS=Homo sapiens GN=FKBP7 PE=1 SV=1;>sp Q9Y680-2 FKBP7_HUMAN Isoform 2 of Peptidyl-prolyl cis-trans isomerase FKBP7 OS=Homo sapiens GN=FKBP7 PE=1 SV=1                                                 | 8.68E-09  |



|                                 |                                                                                                                               |           |
|---------------------------------|-------------------------------------------------------------------------------------------------------------------------------|-----------|
| Q9Y6A4;B4DN94                   | CP080_HUMAN UPF0468 protein C16orf80 OS=Homo sapiens GN=C16orf80 PE=1 SV=1;>tr B4DN94 B4DN94_HUMAN cDNA FLJ58844              | 3.05E-28  |
| Q9Y6C9;Q53G34                   | MTCH2_HUMAN Mitochondrial carrier homolog 2 OS=Homo sapiens GN=MTCH2 PE=1 SV=1;>tr Q53G34 Q53G34_HUMAN Mitochondr             | 1.00E-121 |
| Q9Y6D5;Q9Y6D6;Q59FY5;BIG2_HUMAN | Brefeldin A-inhibited guanine nucleotide-exchange protein 2 OS=Homo sapiens GN=ARFGEF2 PE=1 SV=3;>sp Q9Y6D6                   | 9.60E-08  |
| Q9Y6G9;Q6MZE7;B3KM42            | DC1L1_HUMAN Cytoplasmic dynein 1 light intermediate chain 1 OS=Homo sapiens GN=DYNC1LI1 PE=1 SV=3;>tr Q6MZE7 Q6MZE7_          | 2.15E-145 |
| Q9Y6H1;Q5T1J5                   | CHCH2_HUMAN Coiled-coil-helix-coiled-coil-helix domain-containing protein 2, mitochondrial OS=Homo sapiens GN=CHCHD2 PE=1 SV= | 1.06E-13  |
| Q9Y6M9;B7Z7N1;Q5JVG7            | NDUB9_HUMAN NADH dehydrogenase [ubiquinone] 1 beta subcomplex subunit 9 OS=Homo sapiens GN=NDUFB9 PE=1 SV=3;>tr B7Z           | 1.35E-51  |
| Q9Y6W5;B4DZN0;Q8IV90            | WASF2_HUMAN Wiskott-Aldrich syndrome protein family member 2 OS=Homo sapiens GN=WASF2 PE=1 SV=3;>tr B4DZN0 B4DZN0_            | 3.79E-42  |
| Q9Y6W5;Q9UPY6                   | WASF2_HUMAN Wiskott-Aldrich syndrome protein family member 2 OS=Homo sapiens GN=WASF2 PE=1 SV=3;>sp Q9UPY6 WASF3_I            | 5.17E-23  |
