# Supplementary material for: Proteomic analysis of breast tumors confirms the mRNA intrinsic molecular subtypes using different classifiers: a large-scale analysis of fresh frozen tissue samples
Source: Springer Nature journal article supplement (doi:10.1186/s13058-016-0732-2), 2016-06-29
Supplement: MOESM4 [file 10305388]

| Protein Name            | Peptide              | Begin Pos | End Pos | Q1 m/z     | Q3 m/z      | Collision energy (V) | Fragment |
|-------------------------|----------------------|-----------|---------|------------|-------------|----------------------|----------|
| sp O00231 PSD11_HUMAN   | EQSILELGSLLAK        | 46        | 58      | 700.903399 | 588.371538  | 23.9                 | y6       |
| sp O00231 PSD11_HUMAN   | EQSILELGSLLAK        | 46        | 58      | 700.903399 | 830.498195  | 23.9                 | y8       |
| sp O00231 PSD11_HUMAN   | EQSILELGSLLAK        | 46        | 58      | 700.903399 | 943.582259  | 23.9                 | y9       |
| sp O00231 PSD11_HUMAN   | EQSILELGSLLAK        | 46        | 58      | 700.903399 | 1143.698351 | 23.9                 | y11      |
| sp O00299 CLIC1_HUMAN   | NSNPALNDNLEK         | 119       | 130     | 664.82568  | 732.352259  | 22.8                 | y6       |
| sp O00299 CLIC1_HUMAN   | NSNPALNDNLEK         | 119       | 130     | 664.82568  | 845.436323  | 22.8                 | y7       |
| sp O00299 CLIC1_HUMAN   | NSNPALNDNLEK         | 119       | 130     | 664.82568  | 1013.526201 | 22.8                 | y9       |
| sp O00299 CLIC1_HUMAN   | NSNPALNDNLEK         | 119       | 130     | 664.82568  | 1127.569128 | 22.8                 | y10      |
| sp O00303 EIF3F_HUMAN   | YAYYDTER             | 238       | 245     | 540.735271 | 683.299495  | 19.1                 | y5       |
| sp O00303 EIF3F_HUMAN   | YAYYDTER             | 238       | 245     | 540.735271 | 846.362824  | 19.1                 | y6       |
| sp O00303 EIF3F_HUMAN   | YAYYDTER             | 238       | 245     | 540.735271 | 917.399937  | 19.1                 | y7       |
| sp O14745 NHRF1_HUMAN   | LLVDPETDEQLQK        | 87        | 100     | 813.932885 | 1087.526595 | 27.3                 | y9       |
| sp O14745 NHRF1_HUMAN   | LLVDPETDEQLQK        | 87        | 100     | 813.932885 | 1202.553538 | 27.3                 | y10      |
| sp O14745 NHRF1_HUMAN   | LLVDPETDEQLQK        | 87        | 100     | 813.932885 | 1301.621952 | 27.3                 | y11      |
| sp O14745 NHRF1_HUMAN   | LVEPGSPA EK          | 40        | 49      | 513.776939 | 444.245275  | 18.3                 | y4       |
| sp O14745 NHRF1_HUMAN   | LVEPGSPA EK          | 40        | 49      | 513.776939 | 588.298767  | 18.3                 | y6       |
| sp O14745 NHRF1_HUMAN   | LVEPGSPA EK          | 40        | 49      | 513.776939 | 685.351531  | 18.3                 | y7       |
| sp O14745 NHRF1_HUMAN   | LVEPGSPA EK          | 40        | 49      | 513.776939 | 814.394124  | 18.3                 | y8       |
| sp O14818 PSA7_HUMAN    | ALLEVVQSGGK          | 193       | 203     | 550.819138 | 348.18776   | 19.4                 | y4       |
| sp O14818 PSA7_HUMAN    | ALLEVVQSGGK          | 193       | 203     | 550.819138 | 575.314751  | 19.4                 | y6       |
| sp O14818 PSA7_HUMAN    | ALLEVVQSGGK          | 193       | 203     | 550.819138 | 674.383165  | 19.4                 | y7       |
| sp O14818 PSA7_HUMAN    | ALLEVVQSGGK          | 193       | 203     | 550.819138 | 803.425758  | 19.4                 | y8       |
| sp O14879 IFIT3_HUMAN   | EAEGEQFVEEALEK       | 222       | 235     | 804.3754   | 718.361761  | 27                   | y6       |
| sp O14879 IFIT3_HUMAN   | EAEGEQFVEEALEK       | 222       | 235     | 804.3754   | 817.430175  | 27                   | y7       |
| sp O14879 IFIT3_HUMAN   | EAEGEQFVEEALEK       | 222       | 235     | 804.3754   | 964.498589  | 27                   | y8       |
| sp O14879 IFIT3_HUMAN   | EAEGEQFVEEALEK       | 222       | 235     | 804.3754   | 1092.557166 | 27                   | y9       |
| sp O14879 IFIT3_HUMAN   | VC[+57.0]NQIEFLNTEFK | 37        | 49      | 821.400698 | 751.398481  | 27.5                 | y6       |
| sp O14879 IFIT3_HUMAN   | VC[+57.0]NQIEFLNTEFK | 37        | 49      | 821.400698 | 898.466895  | 27.5                 | y7       |
| sp O14879 IFIT3_HUMAN   | VC[+57.0]NQIEFLNTEFK | 37        | 49      | 821.400698 | 1027.509488 | 27.5                 | y8       |
| sp O14879 IFIT3_HUMAN   | VC[+57.0]NQIEFLNTEFK | 146       | 154     | 821.400698 | 1140.593552 | 27.5                 | y9       |
| sp O43175 SERA_HUMAN    | TLGILGLGR            | 35        | 43      | 450.287277 | 515.355159  | 16.4                 | c5       |
| sp O43175 SERA_HUMAN    | TLGILGLGR            | 35        | 43      | 450.287277 | 685.435535  | 16.4                 | y7       |
| sp O43175 SERA_HUMAN    | TLGILGLGR            | 35        | 43      | 450.287277 | 685.460687  | 16.4                 | c7       |
| sp O43175 SERA_HUMAN    | TLGILGLGR            | 146       | 154     | 450.287277 | 402.245943  | 16.4                 | y4       |
| sp O43175 SERA_HUMAN    | TLGILGLGR            | 146       | 154     | 450.287277 | 515.330007  | 16.4                 | y5       |
| sp O60814 H2B1K_HUMAN   | ESYSVYVYK            | 776       | 788     | 569.276772 | 310.176132  | 20                   | y2       |
| sp O60814 H2B1K_HUMAN   | ESYSVYVYK            | 776       | 788     | 569.276772 | 572.307875  | 20                   | y4       |
| sp O60814 H2B1K_HUMAN   | ESYSVYVYK            | 776       | 788     | 569.276772 | 671.376289  | 20                   | y5       |
| sp O60814 H2B1K_HUMAN   | ESYSVYVYK            | 776       | 788     | 569.276772 | 758.408317  | 20                   | y6       |
| sp O75400 PR40A_HUMAN   | EPAFEDITLESER        | 328       | 341     | 768.364835 | 520.236166  | 26                   | y4       |
| sp O75400 PR40A_HUMAN   | EPAFEDITLESER        | 328       | 341     | 768.364835 | 734.367909  | 26                   | y6       |
| sp O75400 PR40A_HUMAN   | EPAFEDITLESER        | 328       | 341     | 768.364835 | 962.478916  | 26                   | y8       |
| sp O75400 PR40A_HUMAN   | EPAFEDITLESER        | 328       | 341     | 768.364835 | 1091.521509 | 26                   | y9       |
| sp O75477 ERLN1_HUMAN   | EALEPSGENVIQNK       | 97        | 104     | 764.386102 | 844.452307  | 25.8                 | y7       |
| sp O75477 ERLN1_HUMAN   | EALEPSGENVIQNK       | 97        | 104     | 764.386102 | 901.473771  | 25.8                 | y8       |
| sp O75477 ERLN1_HUMAN   | EALEPSGENVIQNK       | 97        | 104     | 764.386102 | 988.505799  | 25.8                 | y9       |
| sp O75477 ERLN1_HUMAN   | EALEPSGENVIQNK       | 97        | 104     | 764.386102 | 1085.558563 | 25.8                 | y10      |
| sp O75608 LYPA1_HUMAN   | ALIDQEVK             | 97        | 104     | 458.260925 | 147.112804  | 16.7                 | y1       |
| sp O75608 LYPA1_HUMAN   | ALIDQEVK             | 97        | 104     | 458.260925 | 503.282388  | 16.7                 | y4       |
| sp O75608 LYPA1_HUMAN   | ALIDQEVK             | 97        | 104     | 458.260925 | 618.309331  | 16.7                 | y5       |
| sp O75608 LYPA1_HUMAN   | ALIDQEVK             | 97        | 104     | 458.260925 | 731.393395  | 16.7                 | y6       |
| sp O75947 ATP5H_HUMAN   | AGLVDDFEK            | 63        | 71      | 497.248014 | 538.250754  | 17.8                 | y4       |
| sp O75947 ATP5H_HUMAN   | AGLVDDFEK            | 63        | 71      | 497.248014 | 653.277697  | 17.8                 | y5       |
| sp O75947 ATP5H_HUMAN   | AGLVDDFEK            | 63        | 71      | 497.248014 | 752.346111  | 17.8                 | y6       |
| sp O75947 ATP5H_HUMAN   | AGLVDDFEK            | 63        | 71      | 497.248014 | 865.430175  | 17.8                 | y7       |
| sp O75964 ATP5L_HUMAN   | LATFWYYAK            | 26        | 34      | 581.800217 | 544.276575  | 20.4                 | y4       |
| sp O75964 ATP5L_HUMAN   | LATFWYYAK            | 26        | 34      | 581.800217 | 730.355888  | 20.4                 | y5       |
| sp O75964 ATP5L_HUMAN   | LATFWYYAK            | 26        | 34      | 581.800217 | 877.424302  | 20.4                 | y6       |
| sp O75964 ATP5L_HUMAN   | LATFWYYAK            | 26        | 34      | 581.800217 | 978.47198   | 20.4                 | y7       |
| sp O94855-2 SC24D_HUMAN | ILFQPQTNVYDSLAK      | 608       | 622     | 868.964519 | 418.26601   | 29                   | y4       |
| sp O94855-2 SC24D_HUMAN | ILFQPQTNVYDSLAK      | 608       | 622     | 868.964519 | 909.467623  | 29                   | y8       |
| sp O94855-2 SC24D_HUMAN | ILFQPQTNVYDSLAK      | 608       | 622     | 868.964519 | 1010.515302 | 29                   | y9       |
| sp O94855-2 SC24D_HUMAN | ILFQPQTNVYDSLAK      | 608       | 622     | 868.964519 | 1235.626643 | 29                   | y11      |

|                        |                   |      |      |            |             |      |     |
|------------------------|-------------------|------|------|------------|-------------|------|-----|
| sp O94925-3 GLSK_HUMAN | DGPGETDAFGNSEGK   | 106  | 120  | 740.812967 | 591.27328   | 25.1 | y6  |
| sp O94925-3 GLSK_HUMAN | DGPGETDAFGNSEGK   | 106  | 120  | 740.812967 | 809.378808  | 25.1 | y8  |
| sp O94925-3 GLSK_HUMAN | DGPGETDAFGNSEGK   | 106  | 120  | 740.812967 | 924.405751  | 25.1 | y9  |
| sp O94925-3 GLSK_HUMAN | DGPGETDAFGNSEGK   | 106  | 120  | 740.812967 | 1025.45343  | 25.1 | y10 |
| sp O95154 ARK73_HUMAN  | FQLETSLK          | 92   | 99   | 483.26875  | 448.276575  | 17.4 | y4  |
| sp O95154 ARK73_HUMAN  | FQLETSLK          | 92   | 99   | 483.26875  | 577.319168  | 17.4 | y5  |
| sp O95154 ARK73_HUMAN  | FQLETSLK          | 92   | 99   | 483.26875  | 690.403232  | 17.4 | y6  |
| sp O95154 ARK73_HUMAN  | FQLETSLK          | 92   | 99   | 483.26875  | 818.461809  | 17.4 | y7  |
| sp O95163 ELP1_HUMAN   | SVVLQLADGQIFK     | 567  | 579  | 709.406109 | 592.345323  | 24.2 | y5  |
| sp O95163 ELP1_HUMAN   | SVVLQLADGQIFK     | 567  | 579  | 709.406109 | 778.40938   | 24.2 | y7  |
| sp O95163 ELP1_HUMAN   | SVVLQLADGQIFK     | 567  | 579  | 709.406109 | 891.493444  | 24.2 | y8  |
| sp O95163 ELP1_HUMAN   | SVVLQLADGQIFK     | 567  | 579  | 709.406109 | 1019.552021 | 24.2 | y9  |
| sp P00325 ADH1B_HUMAN  | AAVLWEVK          | 12   | 19   | 458.268553 | 375.223811  | 16.7 | y3  |
| sp P00325 ADH1B_HUMAN  | AAVLWEVK          | 12   | 19   | 458.268553 | 561.303124  | 16.7 | y4  |
| sp P00325 ADH1B_HUMAN  | AAVLWEVK          | 12   | 19   | 458.268553 | 674.387188  | 16.7 | y5  |
| sp P00325 ADH1B_HUMAN  | AAVLWEVK          | 12   | 19   | 458.268553 | 773.455602  | 16.7 | y6  |
| sp P00325 ADH1B_HUMAN  | MVAVGIC[+57.0]R   | 40   | 47   | 453.238415 | 505.255128  | 16.5 | y4  |
| sp P00325 ADH1B_HUMAN  | MVAVGIC[+57.0]R   | 40   | 47   | 453.238415 | 604.323542  | 16.5 | y5  |
| sp P00325 ADH1B_HUMAN  | MVAVGIC[+57.0]R   | 40   | 47   | 453.238415 | 675.360656  | 16.5 | y6  |
| sp P02511 CRYAB_HUMAN  | FSVNLDVK          | 74   | 81   | 461.255642 | 246.181218  | 16.7 | y2  |
| sp P02511 CRYAB_HUMAN  | FSVNLDVK          | 74   | 81   | 461.255642 | 588.335152  | 16.7 | y5  |
| sp P02511 CRYAB_HUMAN  | FSVNLDVK          | 74   | 81   | 461.255642 | 687.403566  | 16.7 | y6  |
| sp P02511 CRYAB_HUMAN  | FSVNLDVK          | 74   | 81   | 461.255642 | 774.435595  | 16.7 | y7  |
| sp P02533 K1C14_HUMAN  | DAEEWFFTK         | 300  | 308  | 586.766571 | 542.29731   | 20.5 | y4  |
| sp P02533 K1C14_HUMAN  | DAEEWFFTK         | 300  | 308  | 586.766571 | 728.376623  | 20.5 | y5  |
| sp P02533 K1C14_HUMAN  | DAEEWFFTK         | 300  | 308  | 586.766571 | 857.419216  | 20.5 | y6  |
| sp P02533 K1C14_HUMAN  | DAEEWFFTK         | 300  | 308  | 586.766571 | 986.461809  | 20.5 | y7  |
| sp P02538 K2C6A_HUMAN  | AIGGGLSSVGGGSSTIK | 533  | 549  | 724.391187 | 649.351531  | 24.6 | y7  |
| sp P02538 K2C6A_HUMAN  | AIGGGLSSVGGGSSTIK | 533  | 549  | 724.391187 | 706.372994  | 24.6 | y8  |
| sp P02538 K2C6A_HUMAN  | AIGGGLSSVGGGSSTIK | 533  | 549  | 724.391187 | 892.473437  | 24.6 | y10 |
| sp P02538 K2C6A_HUMAN  | AIGGGLSSVGGGSSTIK | 533  | 549  | 724.391187 | 979.505465  | 24.6 | y11 |
| sp P02743 SAMP_HUMAN   | AYSLFSYNTQGR      | 64   | 75   | 703.83859  | 575.289599  | 24   | y5  |
| sp P02743 SAMP_HUMAN   | AYSLFSYNTQGR      | 64   | 75   | 703.83859  | 738.352928  | 24   | y6  |
| sp P02743 SAMP_HUMAN   | AYSLFSYNTQGR      | 64   | 75   | 703.83859  | 825.384956  | 24   | y7  |
| sp P02743 SAMP_HUMAN   | AYSLFSYNTQGR      | 64   | 75   | 703.83859  | 972.45337   | 24   | y8  |
| sp P02743 SAMP_HUMAN   | VGEYSLYIGR        | 86   | 95   | 578.803488 | 508.287808  | 20.3 | y4  |
| sp P02743 SAMP_HUMAN   | VGEYSLYIGR        | 86   | 95   | 578.803488 | 621.371872  | 20.3 | y5  |
| sp P02743 SAMP_HUMAN   | VGEYSLYIGR        | 86   | 95   | 578.803488 | 708.403901  | 20.3 | y6  |
| sp P02743 SAMP_HUMAN   | VGEYSLYIGR        | 86   | 95   | 578.803488 | 871.467229  | 20.3 | y7  |
| sp P02788 TRFL_HUMAN   | GGSFQNLQGLK       | 119  | 131  | 695.869891 | 687.403566  | 23.8 | y6  |
| sp P02788 TRFL_HUMAN   | GGSFQNLQGLK       | 119  | 131  | 695.869891 | 801.446494  | 23.8 | y7  |
| sp P02788 TRFL_HUMAN   | GGSFQNLQGLK       | 119  | 131  | 695.869891 | 914.530558  | 23.8 | y8  |
| sp P02788 TRFL_HUMAN   | GGSFQNLQGLK       | 119  | 131  | 695.869891 | 1042.589135 | 23.8 | y9  |
| sp P02788 TRFL_HUMAN   | YLGPPQYVAGITNLK   | 636  | 649  | 768.924666 | 475.287474  | 26   | y4  |
| sp P02788 TRFL_HUMAN   | YLGPPQYVAGITNLK   | 636  | 649  | 768.924666 | 645.393001  | 26   | y6  |
| sp P02788 TRFL_HUMAN   | YLGPPQYVAGITNLK   | 636  | 649  | 768.924666 | 716.430115  | 26   | y7  |
| sp P02788 TRFL_HUMAN   | YLGPPQYVAGITNLK   | 636  | 649  | 768.924666 | 1260.694663 | 26   | y12 |
| sp P04075 ALDOA_HUMAN  | ALQASALK          | 304  | 311  | 401.245078 | 418.26601   | 14.9 | y4  |
| sp P04075 ALDOA_HUMAN  | ALQASALK          | 304  | 311  | 401.245078 | 489.303124  | 14.9 | y5  |
| sp P04075 ALDOA_HUMAN  | ALQASALK          | 304  | 311  | 401.245078 | 617.361701  | 14.9 | y6  |
| sp P04075 ALDOA_HUMAN  | GILAADESTGSIK     | 28   | 41   | 666.853906 | 475.287474  | 22.9 | y5  |
| sp P04075 ALDOA_HUMAN  | GILAADESTGSIK     | 28   | 41   | 666.853906 | 907.436717  | 22.9 | y9  |
| sp P04075 ALDOA_HUMAN  | GILAADESTGSIK     | 28   | 41   | 666.853906 | 978.473831  | 22.9 | y10 |
| sp P04075 ALDOA_HUMAN  | GILAADESTGSIK     | 28   | 41   | 666.853906 | 1049.510944 | 22.9 | y11 |
| sp P04275 VWF_HUMAN    | YAGSQVASTSEVLK    | 1348 | 1361 | 720.372463 | 763.41961   | 24.5 | y7  |
| sp P04275 VWF_HUMAN    | YAGSQVASTSEVLK    | 1348 | 1361 | 720.372463 | 834.456724  | 24.5 | y8  |
| sp P04275 VWF_HUMAN    | YAGSQVASTSEVLK    | 1348 | 1361 | 720.372463 | 933.525138  | 24.5 | y9  |
| sp P04275 VWF_HUMAN    | YAGSQVASTSEVLK    | 1348 | 1361 | 720.372463 | 1205.637208 | 24.5 | y12 |
| sp P04275 VWF_HUMAN    | YTLFQIFSK         | 1362 | 1370 | 573.813324 | 381.213246  | 20.1 | y3  |
| sp P04275 VWF_HUMAN    | YTLFQIFSK         | 1362 | 1370 | 573.813324 | 622.355888  | 20.1 | y5  |
| sp P04275 VWF_HUMAN    | YTLFQIFSK         | 1362 | 1370 | 573.813324 | 769.424302  | 20.1 | y6  |
| sp P04275 VWF_HUMAN    | YTLFQIFSK         | 1362 | 1370 | 573.813324 | 882.508366  | 20.1 | y7  |
| sp P04350 TBB4A_HUMAN  | YLTVAAVFR         | 309  | 317  | 520.300384 | 492.292893  | 18.5 | y4  |
| sp P04350 TBB4A_HUMAN  | YLTVAAVFR         | 309  | 317  | 520.300384 | 563.330007  | 18.5 | y5  |
| sp P04350 TBB4A_HUMAN  | YLTVAAVFR         | 309  | 317  | 520.300384 | 662.398421  | 18.5 | y6  |

|                       |                     |      |      |            |             |      |     |
|-----------------------|---------------------|------|------|------------|-------------|------|-----|
| sp P04350 TBB4A_HUMAN | YLTVAAVFR           | 309  | 317  | 520.300384 | 763.4461    | 18.5 | y7  |
| sp P04792 HSPB1_HUMAN | AQLGGPEAAK          | 188  | 197  | 471.256174 | 289.187031  | 17   | y3  |
| sp P04792 HSPB1_HUMAN | AQLGGPEAAK          | 188  | 197  | 471.256174 | 572.303852  | 17   | y6  |
| sp P04792 HSPB1_HUMAN | AQLGGPEAAK          | 188  | 197  | 471.256174 | 629.325316  | 17   | y7  |
| sp P04792 HSPB1_HUMAN | AQLGGPEAAK          | 188  | 197  | 471.256174 | 742.40938   | 17   | y8  |
| sp P04792 HSPB1_HUMAN | LFDQAFGLPR          | 27   | 36   | 582.314023 | 272.171716  | 20.4 | y2  |
| sp P04792 HSPB1_HUMAN | LFDQAFGLPR          | 27   | 36   | 582.314023 | 442.277243  | 20.4 | y4  |
| sp P04792 HSPB1_HUMAN | LFDQAFGLPR          | 27   | 36   | 582.314023 | 660.382771  | 20.4 | y6  |
| sp P04792 HSPB1_HUMAN | LFDQAFGLPR          | 27   | 36   | 582.314023 | 903.468292  | 20.4 | y8  |
| sp P04839 CY24B_HUMAN | LLGSALALAR          | 44   | 53   | 492.813659 | 359.24013   | 17.7 | y3  |
| sp P04839 CY24B_HUMAN | LLGSALALAR          | 44   | 53   | 492.813659 | 430.277243  | 17.7 | y4  |
| sp P04839 CY24B_HUMAN | LLGSALALAR          | 44   | 53   | 492.813659 | 543.361307  | 17.7 | y5  |
| sp P04839 CY24B_HUMAN | LLGSALALAR          | 44   | 53   | 492.813659 | 758.451913  | 17.7 | y8  |
| sp P04839 CY24B_HUMAN | QSIENSESGPR         | 548  | 558  | 581.278366 | 416.225208  | 20.3 | y4  |
| sp P04839 CY24B_HUMAN | QSIENSESGPR         | 548  | 558  | 581.278366 | 545.267801  | 20.3 | y5  |
| sp P04839 CY24B_HUMAN | QSIENSESGPR         | 548  | 558  | 581.278366 | 632.299829  | 20.3 | y6  |
| sp P04839 CY24B_HUMAN | QSIENSESGPR         | 548  | 558  | 581.278366 | 946.458849  | 20.3 | y9  |
| sp P05090 APOD_HUMAN  | NILTSNNIDVK         | 164  | 174  | 615.838059 | 702.37808   | 21.4 | y6  |
| sp P05090 APOD_HUMAN  | NILTSNNIDVK         | 164  | 174  | 615.838059 | 789.410108  | 21.4 | y7  |
| sp P05090 APOD_HUMAN  | NILTSNNIDVK         | 164  | 174  | 615.838059 | 890.457787  | 21.4 | y8  |
| sp P05090 APOD_HUMAN  | NILTSNNIDVK         | 164  | 174  | 615.838059 | 1003.541851 | 21.4 | y9  |
| sp P05109 S10A8_HUMAN | ALNSIIDVYHK         | 7    | 17   | 636.850969 | 546.303458  | 22   | y4  |
| sp P05109 S10A8_HUMAN | ALNSIIDVYHK         | 7    | 17   | 636.850969 | 661.330401  | 22   | y5  |
| sp P05109 S10A8_HUMAN | ALNSIIDVYHK         | 7    | 17   | 636.850969 | 774.414465  | 22   | y6  |
| sp P05109 S10A8_HUMAN | ALNSIIDVYHK         | 7    | 17   | 636.850969 | 887.498529  | 22   | y7  |
| sp P05783 K1C18_HUMAN | LEAEIATYR           | 372  | 380  | 533.282388 | 510.267073  | 18.9 | y4  |
| sp P05783 K1C18_HUMAN | LEAEIATYR           | 372  | 380  | 533.282388 | 623.351137  | 18.9 | y5  |
| sp P05783 K1C18_HUMAN | LEAEIATYR           | 372  | 380  | 533.282388 | 752.39373   | 18.9 | y6  |
| sp P05783 K1C18_HUMAN | LEAEIATYR           | 372  | 380  | 533.282388 | 823.430844  | 18.9 | y7  |
| sp P05787 K2C8_HUMAN  | ASLEAAIADAEQR       | 328  | 340  | 672.84133  | 618.284179  | 23.1 | y5  |
| sp P05787 K2C8_HUMAN  | ASLEAAIADAEQR       | 328  | 340  | 672.84133  | 689.321293  | 23.1 | y6  |
| sp P05787 K2C8_HUMAN  | ASLEAAIADAEQR       | 328  | 340  | 672.84133  | 727.398481  | 23.1 | b8  |
| sp P05787 K2C8_HUMAN  | ASLEAAIADAEQR       | 328  | 340  | 672.84133  | 802.405357  | 23.1 | y7  |
| sp P05787 K2C8_HUMAN  | LSELEAALQR          | 352  | 361  | 565.31422  | 558.335821  | 19.9 | y5  |
| sp P05787 K2C8_HUMAN  | LSELEAALQR          | 352  | 361  | 565.31422  | 687.378414  | 19.9 | y6  |
| sp P05787 K2C8_HUMAN  | LSELEAALQR          | 352  | 361  | 565.31422  | 800.462478  | 19.9 | y7  |
| sp P05787 K2C8_HUMAN  | LSELEAALQR          | 352  | 361  | 565.31422  | 929.505071  | 19.9 | y8  |
| sp P06730 IF4E_HUMAN  | IAIWTTEC[+57.0]ENR  | 162  | 172  | 696.832451 | 578.235121  | 23.8 | y4  |
| sp P06730 IF4E_HUMAN  | IAIWTTEC[+57.0]ENR  | 162  | 172  | 696.832451 | 808.325392  | 23.8 | y6  |
| sp P06730 IF4E_HUMAN  | IAIWTTEC[+57.0]ENR  | 162  | 172  | 696.832451 | 909.373071  | 23.8 | y7  |
| sp P06730 IF4E_HUMAN  | IAIWTTEC[+57.0]ENR  | 162  | 172  | 696.832451 | 1095.452384 | 23.8 | y8  |
| sp P07602 SAP_HUMAN   | GC[+57.0]SFLPDPYQK  | 438  | 448  | 656.305538 | 535.287474  | 22.6 | y4  |
| sp P07602 SAP_HUMAN   | GC[+57.0]SFLPDPYQK  | 438  | 448  | 656.305538 | 747.367181  | 22.6 | y6  |
| sp P07602 SAP_HUMAN   | GC[+57.0]SFLPDPYQK  | 438  | 448  | 656.305538 | 860.451245  | 22.6 | y7  |
| sp P07602 SAP_HUMAN   | GC[+57.0]SFLPDPYQK  | 438  | 448  | 656.305538 | 1094.551687 | 22.6 | y9  |
| sp P07864 LDHC_HUMAN  | VIGSGC[+57.0]NLDSAR | 157  | 168  | 624.803693 | 448.215037  | 21.6 | y4  |
| sp P07864 LDHC_HUMAN  | VIGSGC[+57.0]NLDSAR | 157  | 168  | 624.803693 | 675.342029  | 21.6 | y6  |
| sp P07864 LDHC_HUMAN  | VIGSGC[+57.0]NLDSAR | 157  | 168  | 624.803693 | 892.394141  | 21.6 | y8  |
| sp P07864 LDHC_HUMAN  | VIGSGC[+57.0]NLDSAR | 157  | 168  | 624.803693 | 1036.447633 | 21.6 | y10 |
| sp P07942 LAMB1_HUMAN | ELAEQLEFIK          | 77   | 84   | 610.332078 | 977.530223  | 21.2 | y8  |
| sp P07942 LAMB1_HUMAN | ELAEQLEFIK          | 1300 | 1309 | 610.332078 | 536.307875  | 21.2 | y4  |
| sp P07942 LAMB1_HUMAN | ELAEQLEFIK          | 1300 | 1309 | 610.332078 | 649.391939  | 21.2 | y5  |
| sp P07942 LAMB1_HUMAN | ELAEQLEFIK          | 1300 | 1309 | 610.332078 | 777.450516  | 21.2 | y6  |
| sp P08294 SODE_HUMAN  | VTGVVLF             | 77   | 84   | 445.776545 | 435.27143   | 16.3 | y3  |
| sp P08294 SODE_HUMAN  | VTGVVLF             | 77   | 84   | 445.776545 | 534.339844  | 16.3 | y4  |
| sp P08294 SODE_HUMAN  | VTGVVLF             | 77   | 84   | 445.776545 | 690.429721  | 16.3 | y6  |
| sp P08294 SODE_HUMAN  | VTGVVLF             | 77   | 84   | 445.776545 | 791.4774    | 16.3 | y7  |
| sp P08572 CO4A2_HUMAN | SVSIGYLLVK          | 1484 | 1493 | 539.828974 | 635.412674  | 19.1 | y5  |
| sp P08572 CO4A2_HUMAN | SVSIGYLLVK          | 1484 | 1493 | 539.828974 | 692.434138  | 19.1 | y6  |
| sp P08572 CO4A2_HUMAN | SVSIGYLLVK          | 1484 | 1493 | 539.828974 | 805.518202  | 19.1 | y7  |
| sp P08572 CO4A2_HUMAN | SVSIGYLLVK          | 1484 | 1493 | 539.828974 | 892.55023   | 19.1 | y8  |
| sp P08727 K1C19_HUMAN | FGPGVAFR            | 25   | 32   | 425.732137 | 393.22448   | 15.7 | y3  |
| sp P08727 K1C19_HUMAN | FGPGVAFR            | 25   | 32   | 425.732137 | 492.292893  | 15.7 | y4  |
| sp P08727 K1C19_HUMAN | FGPGVAFR            | 25   | 32   | 425.732137 | 549.314357  | 15.7 | y5  |
| sp P08727 K1C19_HUMAN | FGPGVAFR            | 25   | 32   | 425.732137 | 646.367121  | 15.7 | y6  |

|                         |                 |      |      |            |             |      |     |
|-------------------------|-----------------|------|------|------------|-------------|------|-----|
| sp P08727 K1C19_HUMAN   | ILGATIENSR      | 140  | 149  | 537.301112 | 505.236501  | 19   | y4  |
| sp P08727 K1C19_HUMAN   | ILGATIENSR      | 140  | 149  | 537.301112 | 618.320565  | 19   | y5  |
| sp P08727 K1C19_HUMAN   | ILGATIENSR      | 140  | 149  | 537.301112 | 719.368243  | 19   | y6  |
| sp P08727 K1C19_HUMAN   | ILGATIENSR      | 140  | 149  | 537.301112 | 847.426821  | 19   | y8  |
| sp P08779 K1C16_HUMAN   | EVFTSSSSSSSR    | 441  | 452  | 630.788763 | 610.279094  | 21.8 | y6  |
| sp P08779 K1C16_HUMAN   | EVFTSSSSSSSR    | 441  | 452  | 630.788763 | 697.311122  | 21.8 | y7  |
| sp P08779 K1C16_HUMAN   | EVFTSSSSSSSR    | 441  | 452  | 630.788763 | 784.343151  | 21.8 | y8  |
| sp P08779 K1C16_HUMAN   | EVFTSSSSSSSR    | 441  | 452  | 630.788763 | 885.390829  | 21.8 | y9  |
| sp P08865 RSSA_HUMAN    | LLVVTDPDR       | 120  | 127  | 456.779285 | 488.246337  | 16.6 | y4  |
| sp P08865 RSSA_HUMAN    | LLVVTDPDR       | 120  | 127  | 456.779285 | 587.314751  | 16.6 | y5  |
| sp P08865 RSSA_HUMAN    | LLVVTDPDR       | 120  | 127  | 456.779285 | 686.383165  | 16.6 | y6  |
| sp P09455 RET1_HUMAN    | EFEEDLTGIDDR    | 69   | 80   | 719.82026  | 405.172838  | 24.5 | y3  |
| sp P09455 RET1_HUMAN    | EFEEDLTGIDDR    | 69   | 80   | 719.82026  | 575.278366  | 24.5 | y5  |
| sp P09455 RET1_HUMAN    | EFEEDLTGIDDR    | 69   | 80   | 719.82026  | 676.326044  | 24.5 | y6  |
| sp P09455 RET1_HUMAN    | EFEEDLTGIDDR    | 69   | 80   | 719.82026  | 904.437051  | 24.5 | y8  |
| sp P09455 RET1_HUMAN    | IANLLKPKDK      | 32   | 40   | 506.313492 | 359.192511  | 18.1 | y3  |
| sp P09455 RET1_HUMAN    | IANLLKPKDK      | 32   | 40   | 506.313492 | 487.287474  | 18.1 | y4  |
| sp P09455 RET1_HUMAN    | IANLLKPKDK      | 32   | 40   | 506.313492 | 600.371538  | 18.1 | y5  |
| sp P09455 RET1_HUMAN    | IANLLKPKDK      | 32   | 40   | 506.313492 | 827.498529  | 18.1 | y7  |
| sp P09488 GSTM1_HUMAN   | LYSEFLGK        | 136  | 143  | 478.758018 | 464.286745  | 17.3 | y4  |
| sp P09488 GSTM1_HUMAN   | LYSEFLGK        | 136  | 143  | 478.758018 | 593.329339  | 17.3 | y5  |
| sp P09488 GSTM1_HUMAN   | LYSEFLGK        | 136  | 143  | 478.758018 | 680.361367  | 17.3 | y6  |
| sp P09488 GSTM1_HUMAN   | LYSEFLGK        | 136  | 143  | 478.758018 | 843.424696  | 17.3 | y7  |
| sp P09488 GSTM1_HUMAN   | YLEELPEK        | 126  | 133  | 510.76604  | 486.292225  | 18.2 | y4  |
| sp P09488 GSTM1_HUMAN   | YLEELPEK        | 126  | 133  | 510.76604  | 615.334818  | 18.2 | y5  |
| sp P09488 GSTM1_HUMAN   | YLEELPEK        | 126  | 133  | 510.76604  | 744.377411  | 18.2 | y6  |
| sp P09488 GSTM1_HUMAN   | YLEELPEK        | 126  | 133  | 510.76604  | 857.461475  | 18.2 | y7  |
| sp P09493-6 TPM1_HUMAN  | AEDSLAAEEAAAK   | 268  | 283  | 694.848821 | 489.266738  | 23.8 | y5  |
| sp P09493-6 TPM1_HUMAN  | AEDSLAAEEAAAK   | 268  | 283  | 694.848821 | 618.309331  | 23.8 | y6  |
| sp P09493-6 TPM1_HUMAN  | AEDSLAAEEAAAK   | 268  | 283  | 694.848821 | 760.383559  | 23.8 | y8  |
| sp P09493-6 TPM1_HUMAN  | AEDSLAAEEAAAK   | 268  | 283  | 694.848821 | 873.467623  | 23.8 | y9  |
| sp P09493-6 TPM1_HUMAN  | VLEELHK         | 61   | 67   | 434.25036  | 397.25578   | 15.9 | y3  |
| sp P09493-6 TPM1_HUMAN  | VLEELHK         | 61   | 67   | 434.25036  | 526.298373  | 15.9 | y4  |
| sp P09493-6 TPM1_HUMAN  | VLEELHK         | 61   | 67   | 434.25036  | 655.340966  | 15.9 | y5  |
| sp P09493-6 TPM1_HUMAN  | VLEELHK         | 61   | 67   | 434.25036  | 768.42503   | 15.9 | y6  |
| sp P09874 PARP1_HUMAN   | TTNFAGILSQGLR   | 865  | 877  | 689.377883 | 560.315085  | 23.6 | y5  |
| sp P09874 PARP1_HUMAN   | TTNFAGILSQGLR   | 865  | 877  | 689.377883 | 673.399149  | 23.6 | y6  |
| sp P09874 PARP1_HUMAN   | TTNFAGILSQGLR   | 865  | 877  | 689.377883 | 843.504677  | 23.6 | y8  |
| sp P09874 PARP1_HUMAN   | TTNFAGILSQGLR   | 865  | 877  | 689.377883 | 914.541791  | 23.6 | y9  |
| sp P09874 PARP1_HUMAN   | VVSEDFLQDVSASTK | 452  | 466  | 812.906867 | 493.261653  | 27.3 | y5  |
| sp P09874 PARP1_HUMAN   | VVSEDFLQDVSASTK | 452  | 466  | 812.906867 | 707.35701   | 27.3 | y7  |
| sp P09874 PARP1_HUMAN   | VVSEDFLQDVSASTK | 452  | 466  | 812.906867 | 835.415587  | 27.3 | y8  |
| sp P09874 PARP1_HUMAN   | VVSEDFLQDVSASTK | 452  | 466  | 812.906867 | 948.499651  | 27.3 | y9  |
| sp POC055 H2AZ_HUMAN    | ATIAGGGVIPHIHK  | 102  | 115  | 685.898785 | 631.367455  | 23.5 | y5  |
| sp POC055 H2AZ_HUMAN    | ATIAGGGVIPHIHK  | 102  | 115  | 685.898785 | 744.451519  | 23.5 | y6  |
| sp POC055 H2AZ_HUMAN    | ATIAGGGVIPHIHK  | 102  | 115  | 685.898785 | 957.562861  | 23.5 | y9  |
| sp POC055 H2AZ_HUMAN    | ATIAGGGVIPHIHK  | 102  | 115  | 685.898785 | 1014.584325 | 23.5 | y10 |
| sp POC055 H2AZ_HUMAN    | GDEELDSLIK      | 92   | 101  | 559.782418 | 460.31296   | 19.7 | y4  |
| sp POC055 H2AZ_HUMAN    | GDEELDSLIK      | 92   | 101  | 559.782418 | 575.339903  | 19.7 | y5  |
| sp POC055 H2AZ_HUMAN    | GDEELDSLIK      | 92   | 101  | 559.782418 | 688.423967  | 19.7 | y6  |
| sp POC055 H2AZ_HUMAN    | GDEELDSLIK      | 92   | 101  | 559.782418 | 817.46656   | 19.7 | y7  |
| sp POCB38 PAB4L_HUMAN   | NLDDTIDDEK      | 298  | 307  | 589.26459  | 506.209283  | 20.6 | y4  |
| sp POCB38 PAB4L_HUMAN   | NLDDTIDDEK      | 298  | 307  | 589.26459  | 720.341026  | 20.6 | y6  |
| sp POCB38 PAB4L_HUMAN   | NLDDTIDDEK      | 298  | 307  | 589.26459  | 835.367969  | 20.6 | y7  |
| sp POCB38 PAB4L_HUMAN   | NLDDTIDDEK      | 298  | 307  | 589.26459  | 950.394912  | 20.6 | y8  |
| sp P11047 LAMC1_HUMAN   | NTIEETGNLAEQAR  | 1121 | 1134 | 773.378808 | 503.257236  | 26.1 | y4  |
| sp P11047 LAMC1_HUMAN   | NTIEETGNLAEQAR  | 1121 | 1134 | 773.378808 | 574.29435   | 26.1 | y5  |
| sp P11047 LAMC1_HUMAN   | NTIEETGNLAEQAR  | 1121 | 1134 | 773.378808 | 858.442805  | 26.1 | y8  |
| sp P11047 LAMC1_HUMAN   | NTIEETGNLAEQAR  | 1121 | 1134 | 773.378808 | 1217.57567  | 26.1 | y11 |
| sp P11277-2 SPTB1_HUMAN | ETWLSNQR        | 434  | 442  | 581.778001 | 417.220457  | 20.4 | y3  |
| sp P11277-2 SPTB1_HUMAN | ETWLSNQR        | 434  | 442  | 581.778001 | 546.26305   | 20.4 | y4  |
| sp P11277-2 SPTB1_HUMAN | ETWLSNQR        | 434  | 442  | 581.778001 | 633.295078  | 20.4 | y5  |
| sp P11277-2 SPTB1_HUMAN | ETWLSNQR        | 434  | 442  | 581.778001 | 746.379142  | 20.4 | y6  |
| sp P11387 TOP1_HUMAN    | AEEVATFFAK      | 252  | 261  | 556.784764 | 613.334424  | 19.6 | y5  |
| sp P11387 TOP1_HUMAN    | AEEVATFFAK      | 252  | 261  | 556.784764 | 684.371538  | 19.6 | y6  |

|                       |                           |     |     |            |             |      |     |
|-----------------------|---------------------------|-----|-----|------------|-------------|------|-----|
| sp P11387 TOP1_HUMAN  | AEEVATFFAK                | 252 | 261 | 556.784764 | 783.439952  | 19.6 | y7  |
| sp P11387 TOP1_HUMAN  | AEEVATFFAK                | 252 | 261 | 556.784764 | 912.482545  | 19.6 | y8  |
| sp P12273 PIP_HUMAN   | YTAC[+57.0]LC[+57.0]DDNPK | 85  | 95  | 678.78157  | 748.29303   | 23.3 | y6  |
| sp P12273 PIP_HUMAN   | YTAC[+57.0]LC[+57.0]DDNPK | 85  | 95  | 678.78157  | 861.377094  | 23.3 | y7  |
| sp P12273 PIP_HUMAN   | YTAC[+57.0]LC[+57.0]DDNPK | 85  | 95  | 678.78157  | 1021.407742 | 23.3 | y8  |
| sp P12273 PIP_HUMAN   | YTAC[+57.0]LC[+57.0]DDNPK | 85  | 95  | 678.78157  | 1092.444856 | 23.3 | y9  |
| sp P13489 RINI_HUMAN  | LDDC[+57.0]GLTEAR         | 34  | 43  | 575.26387  | 476.246337  | 20.2 | y4  |
| sp P13489 RINI_HUMAN  | LDDC[+57.0]GLTEAR         | 34  | 43  | 575.26387  | 646.351865  | 20.2 | y6  |
| sp P13489 RINI_HUMAN  | LDDC[+57.0]GLTEAR         | 34  | 43  | 575.26387  | 921.409457  | 20.2 | y8  |
| sp P13647 K2C5_HUMAN  | LAELEEALQK                | 431 | 440 | 572.316428 | 588.335152  | 20.1 | y5  |
| sp P13647 K2C5_HUMAN  | LAELEEALQK                | 431 | 440 | 572.316428 | 717.377745  | 20.1 | y6  |
| sp P13647 K2C5_HUMAN  | LAELEEALQK                | 431 | 440 | 572.316428 | 830.461809  | 20.1 | y7  |
| sp P13647 K2C5_HUMAN  | LAELEEALQK                | 431 | 440 | 572.316428 | 959.504403  | 20.1 | y8  |
| sp P13647 K2C5_HUMAN  | VSLAGAC[+57.0]GVGGYGSR    | 48  | 62  | 705.84335  | 596.2787    | 24.1 | y6  |
| sp P13647 K2C5_HUMAN  | VSLAGAC[+57.0]GVGGYGSR    | 48  | 62  | 705.84335  | 752.368578  | 24.1 | y8  |
| sp P13647 K2C5_HUMAN  | VSLAGAC[+57.0]GVGGYGSR    | 48  | 62  | 705.84335  | 912.399226  | 24.1 | y9  |
| sp P13647 K2C5_HUMAN  | VSLAGAC[+57.0]GVGGYGSR    | 48  | 62  | 705.84335  | 1040.457804 | 24.1 | y11 |
| sp P14543 NID1_HUMAN  | EYTVTEPER                 | 587 | 595 | 562.266935 | 401.214309  | 19.8 | y3  |
| sp P14543 NID1_HUMAN  | EYTVTEPER                 | 587 | 595 | 562.266935 | 530.256902  | 19.8 | y4  |
| sp P14543 NID1_HUMAN  | EYTVTEPER                 | 587 | 595 | 562.266935 | 631.30458   | 19.8 | y5  |
| sp P14543 NID1_HUMAN  | EYTVTEPER                 | 587 | 595 | 562.266935 | 831.420673  | 19.8 | y7  |
| sp P15086 CBPB1_HUMAN | LGENNAELNALAK             | 319 | 331 | 678.859523 | 516.314023  | 23.3 | y5  |
| sp P15086 CBPB1_HUMAN | LGENNAELNALAK             | 319 | 331 | 678.859523 | 629.398087  | 23.3 | y6  |
| sp P15086 CBPB1_HUMAN | LGENNAELNALAK             | 319 | 331 | 678.859523 | 758.44068   | 23.3 | y7  |
| sp P15086 CBPB1_HUMAN | LGENNAELNALAK             | 319 | 331 | 678.859523 | 829.477794  | 23.3 | y8  |
| sp P15104 GLNA_HUMAN  | LVLC[+57.0]EVFK           | 95  | 102 | 504.283346 | 522.292225  | 18   | y4  |
| sp P15104 GLNA_HUMAN  | LVLC[+57.0]EVFK           | 95  | 102 | 504.283346 | 682.322873  | 18   | y5  |
| sp P15104 GLNA_HUMAN  | LVLC[+57.0]EVFK           | 95  | 102 | 504.283346 | 795.406937  | 18   | y6  |
| sp P15104 GLNA_HUMAN  | LVLC[+57.0]EVFK           | 95  | 102 | 504.283346 | 894.475351  | 18   | y7  |
| sp P15104 GLNA_HUMAN  | YIEEAIEK                  | 268 | 275 | 497.758215 | 460.276575  | 17.8 | y4  |
| sp P15104 GLNA_HUMAN  | YIEEAIEK                  | 268 | 275 | 497.758215 | 589.319168  | 17.8 | y5  |
| sp P15104 GLNA_HUMAN  | YIEEAIEK                  | 268 | 275 | 497.758215 | 718.361761  | 17.8 | y6  |
| sp P15104 GLNA_HUMAN  | YIEEAIEK                  | 268 | 275 | 497.758215 | 831.445825  | 17.8 | y7  |
| sp P15498 VAV_HUMAN   | AEAEQNWWEGR               | 629 | 639 | 688.304915 | 547.262322  | 23.6 | y4  |
| sp P15498 VAV_HUMAN   | AEAEQNWWEGR               | 629 | 639 | 688.304915 | 733.341635  | 23.6 | y5  |
| sp P15498 VAV_HUMAN   | AEAEQNWWEGR               | 629 | 639 | 688.304915 | 847.384562  | 23.6 | y6  |
| sp P15498 VAV_HUMAN   | AEAEQNWWEGR               | 629 | 639 | 688.304915 | 975.44314   | 23.6 | y7  |
| sp P15559 NQO1_HUMAN  | IQILEGWK                  | 201 | 208 | 493.78711  | 390.21358   | 17.7 | y3  |
| sp P15559 NQO1_HUMAN  | IQILEGWK                  | 201 | 208 | 493.78711  | 519.256174  | 17.7 | y4  |
| sp P15559 NQO1_HUMAN  | IQILEGWK                  | 201 | 208 | 493.78711  | 632.340238  | 17.7 | y5  |
| sp P15559 NQO1_HUMAN  | IQILEGWK                  | 201 | 208 | 493.78711  | 745.424302  | 17.7 | y6  |
| sp P17661 DESM_HUMAN  | DNLLDDLQR                 | 180 | 188 | 551.280377 | 531.288536  | 19.4 | y4  |
| sp P17661 DESM_HUMAN  | DNLLDDLQR                 | 180 | 188 | 551.280377 | 646.315479  | 19.4 | y5  |
| sp P17661 DESM_HUMAN  | DNLLDDLQR                 | 180 | 188 | 551.280377 | 759.399543  | 19.4 | y6  |
| sp P17661 DESM_HUMAN  | DNLLDDLQR                 | 180 | 188 | 551.280377 | 872.483607  | 19.4 | y7  |
| sp P17661 DESM_HUMAN  | FASEASGYQDNIAR            | 355 | 368 | 764.854969 | 716.368578  | 25.9 | y6  |
| sp P17661 DESM_HUMAN  | FASEASGYQDNIAR            | 355 | 368 | 764.854969 | 936.45337   | 25.9 | y8  |
| sp P17661 DESM_HUMAN  | FASEASGYQDNIAR            | 355 | 368 | 764.854969 | 1023.485398 | 25.9 | y9  |
| sp P17661 DESM_HUMAN  | FASEASGYQDNIAR            | 355 | 368 | 764.854969 | 1094.522512 | 25.9 | y10 |
| sp P18440 ARY1_HUMAN  | NYIVDAGFGR                | 117 | 126 | 556.28018  | 436.230293  | 19.6 | y4  |
| sp P18440 ARY1_HUMAN  | NYIVDAGFGR                | 117 | 126 | 556.28018  | 622.29435   | 19.6 | y6  |
| sp P18440 ARY1_HUMAN  | NYIVDAGFGR                | 117 | 126 | 556.28018  | 721.362764  | 19.6 | y7  |
| sp P18440 ARY1_HUMAN  | NYIVDAGFGR                | 117 | 126 | 556.28018  | 834.446828  | 19.6 | y8  |
| sp P19012 K1C15_HUMAN | AGLENSLAETEC[+57.0]R      | 343 | 355 | 725.335555 | 565.239872  | 24.7 | y4  |
| sp P19012 K1C15_HUMAN | AGLENSLAETEC[+57.0]R      | 343 | 355 | 725.335555 | 694.282465  | 24.7 | y5  |
| sp P19012 K1C15_HUMAN | AGLENSLAETEC[+57.0]R      | 343 | 355 | 725.335555 | 765.319579  | 24.7 | y6  |
| sp P19012 K1C15_HUMAN | AGLENSLAETEC[+57.0]R      | 343 | 355 | 725.335555 | 878.403643  | 24.7 | y7  |
| sp P19404 NDUV2_HUMAN | AAAVLPVLDLAQR             | 75  | 87  | 668.900994 | 602.32565   | 23   | y5  |
| sp P19404 NDUV2_HUMAN | AAAVLPVLDLAQR             | 75  | 87  | 668.900994 | 911.530892  | 23   | y8  |
| sp P19404 NDUV2_HUMAN | AAAVLPVLDLAQR             | 75  | 87  | 668.900994 | 1024.614956 | 23   | y9  |
| sp P19404 NDUV2_HUMAN | AAAVLPVLDLAQR             | 75  | 87  | 668.900994 | 1123.68337  | 23   | y10 |
| sp P20774 MIME_HUMAN  | ESAYLYAR                  | 119 | 126 | 486.742899 | 409.219394  | 17.5 | y3  |
| sp P20774 MIME_HUMAN  | ESAYLYAR                  | 119 | 126 | 486.742899 | 522.303458  | 17.5 | y4  |
| sp P20774 MIME_HUMAN  | ESAYLYAR                  | 119 | 126 | 486.742899 | 685.366787  | 17.5 | y5  |
| sp P20774 MIME_HUMAN  | ESAYLYAR                  | 119 | 126 | 486.742899 | 756.403901  | 17.5 | y6  |

|                        |                     |      |      |            |             |      |     |
|------------------------|---------------------|------|------|------------|-------------|------|-----|
| sp P21266 GSTM3_HUMAN  | IAAYLQSDQFC[+57.0]K | 197  | 208  | 722.350476 | 784.329415  | 24.6 | y6  |
| sp P21266 GSTM3_HUMAN  | IAAYLQSDQFC[+57.0]K | 197  | 208  | 722.350476 | 912.387993  | 24.6 | y7  |
| sp P21266 GSTM3_HUMAN  | IAAYLQSDQFC[+57.0]K | 197  | 208  | 722.350476 | 1025.472057 | 24.6 | y8  |
| sp P21266 GSTM3_HUMAN  | IAAYLQSDQFC[+57.0]K | 197  | 208  | 722.350476 | 1188.535385 | 24.6 | y9  |
| sp P22105 TENX_HUMAN   | ILISGLEPSTPYR       | 3606 | 3618 | 723.403566 | 435.235044  | 24.6 | y3  |
| sp P22105 TENX_HUMAN   | ILISGLEPSTPYR       | 3606 | 3618 | 723.403566 | 849.410108  | 24.6 | y7  |
| sp P22105 TENX_HUMAN   | ILISGLEPSTPYR       | 3606 | 3618 | 723.403566 | 1019.515636 | 24.6 | y9  |
| sp P22105 TENX_HUMAN   | ILISGLEPSTPYR       | 3606 | 3618 | 723.403566 | 1106.547664 | 24.6 | y10 |
| sp P22352 GPX3_HUMAN   | QEPGENSEILPTLK      | 106  | 119  | 777.904127 | 571.381374  | 26.2 | y5  |
| sp P22352 GPX3_HUMAN   | QEPGENSEILPTLK      | 106  | 119  | 777.904127 | 900.54006   | 26.2 | y8  |
| sp P22352 GPX3_HUMAN   | QEPGENSEILPTLK      | 106  | 119  | 777.904127 | 1014.582987 | 26.2 | y9  |
| sp P22352 GPX3_HUMAN   | QEPGENSEILPTLK      | 106  | 119  | 777.904127 | 1297.699808 | 26.2 | y12 |
| sp P23470 PTPRG_HUMAN  | DDYFVSGAGLPGR       | 129  | 141  | 677.325316 | 329.193179  | 23.2 | y3  |
| sp P23470 PTPRG_HUMAN  | DDYFVSGAGLPGR       | 129  | 141  | 677.325316 | 442.277243  | 23.2 | y4  |
| sp P23470 PTPRG_HUMAN  | DDYFVSGAGLPGR       | 129  | 141  | 677.325316 | 499.298707  | 23.2 | y5  |
| sp P23470 PTPRG_HUMAN  | DDYFVSGAGLPGR       | 129  | 141  | 677.325316 | 714.389313  | 23.2 | y8  |
| sp P24821-4 TENA_HUMAN | VSIYGVIR            | 1414 | 1421 | 453.774002 | 444.292893  | 16.5 | y4  |
| sp P24821-4 TENA_HUMAN | VSIYGVIR            | 1414 | 1421 | 453.774002 | 607.356222  | 16.5 | y5  |
| sp P24821-4 TENA_HUMAN | VSIYGVIR            | 1414 | 1421 | 453.774002 | 720.440286  | 16.5 | y6  |
| sp P29590 PML_HUMAN    | C[+57.0]FEAHQWFLK   | 150  | 159  | 683.324065 | 858.462084  | 23.4 | y6  |
| sp P29590 PML_HUMAN    | C[+57.0]FEAHQWFLK   | 150  | 159  | 683.324065 | 929.499198  | 23.4 | y7  |
| sp P29590 PML_HUMAN    | C[+57.0]FEAHQWFLK   | 150  | 159  | 683.324065 | 1058.541791 | 23.4 | y8  |
| sp P29590 PML_HUMAN    | C[+57.0]FEAHQWFLK   | 1414 | 1421 | 683.324065 | 721.403172  | 23.4 | y5  |
| sp P29692-2 EF1D_HUMAN | GVVQELQQAISK        | 95   | 106  | 650.366984 | 418.26601   | 22.4 | y4  |
| sp P29692-2 EF1D_HUMAN | GVVQELQQAISK        | 95   | 106  | 650.366984 | 546.324588  | 22.4 | y5  |
| sp P29692-2 EF1D_HUMAN | GVVQELQQAISK        | 95   | 106  | 650.366984 | 787.467229  | 22.4 | y7  |
| sp P29692-2 EF1D_HUMAN | GVVQELQQAISK        | 95   | 106  | 650.366984 | 916.509822  | 22.4 | y8  |
| sp P29692-2 EF1D_HUMAN | SIQLDGLVWGASK       | 219  | 231  | 687.374809 | 362.20341   | 23.5 | y4  |
| sp P29692-2 EF1D_HUMAN | SIQLDGLVWGASK       | 219  | 231  | 687.374809 | 548.282723  | 23.5 | y5  |
| sp P29692-2 EF1D_HUMAN | SIQLDGLVWGASK       | 219  | 231  | 687.374809 | 647.351137  | 23.5 | y6  |
| sp P29692-2 EF1D_HUMAN | SIQLDGLVWGASK       | 219  | 231  | 687.374809 | 932.483607  | 23.5 | y9  |
| sp P29762 RABP1_HUMAN  | VGEGFEEETVDGR       | 67   | 79   | 712.320427 | 547.283451  | 24.3 | y5  |
| sp P29762 RABP1_HUMAN  | VGEGFEEETVDGR       | 67   | 79   | 712.320427 | 805.368637  | 24.3 | y7  |
| sp P29762 RABP1_HUMAN  | VGEGFEEETVDGR       | 67   | 79   | 712.320427 | 934.41123   | 24.3 | y8  |
| sp P29762 RABP1_HUMAN  | VGEGFEEETVDGR       | 67   | 79   | 712.320427 | 1138.501108 | 24.3 | y10 |
| sp P30040 ERP29_HUMAN  | DGDFENPVPTGAVK      | 122  | 136  | 804.880652 | 735.403566  | 27.1 | y7  |
| sp P30040 ERP29_HUMAN  | DGDFENPVPTGAVK      | 122  | 136  | 804.880652 | 931.524744  | 27.1 | y9  |
| sp P30040 ERP29_HUMAN  | DGDFENPVPTGAVK      | 122  | 136  | 804.880652 | 1045.567671 | 27.1 | y10 |
| sp P30040 ERP29_HUMAN  | DGDFENPVPTGAVK      | 122  | 136  | 804.880652 | 1174.610265 | 27.1 | y11 |
| sp P30042 ES1_HUMAN    | NVLTESAR            | 103  | 110  | 445.240524 | 333.188094  | 16.3 | y3  |
| sp P30042 ES1_HUMAN    | NVLTESAR            | 103  | 110  | 445.240524 | 462.230687  | 16.3 | y4  |
| sp P30042 ES1_HUMAN    | NVLTESAR            | 103  | 110  | 445.240524 | 563.278366  | 16.3 | y5  |
| sp P30042 ES1_HUMAN    | NVLTESAR            | 103  | 110  | 445.240524 | 676.36243   | 16.3 | y6  |
| sp P31949 S10AB_HUMAN  | DGYNNTLSK           | 27   | 35   | 530.750921 | 347.228896  | 18.8 | y3  |
| sp P31949 S10AB_HUMAN  | DGYNNTLSK           | 27   | 35   | 530.750921 | 448.276575  | 18.8 | y4  |
| sp P31949 S10AB_HUMAN  | DGYNNTLSK           | 27   | 35   | 530.750921 | 611.339903  | 18.8 | y5  |
| sp P31949 S10AB_HUMAN  | DGYNNTLSK           | 27   | 35   | 530.750921 | 725.382831  | 18.8 | y6  |
| sp P32119 PRDX2_HUMAN  | LSEDYGVLK           | 110  | 118  | 512.271489 | 579.350074  | 18.3 | y5  |
| sp P32119 PRDX2_HUMAN  | LSEDYGVLK           | 110  | 118  | 512.271489 | 694.377017  | 18.3 | y6  |
| sp P32119 PRDX2_HUMAN  | LSEDYGVLK           | 110  | 118  | 512.271489 | 823.41961   | 18.3 | y7  |
| sp P32119 PRDX2_HUMAN  | LSEDYGVLK           | 110  | 118  | 512.271489 | 910.451639  | 18.3 | y8  |
| sp P32119 PRDX2_HUMAN  | TDEGIAYR            | 119  | 126  | 462.724706 | 338.18228   | 16.8 | y2  |
| sp P32119 PRDX2_HUMAN  | TDEGIAYR            | 119  | 126  | 462.724706 | 409.219394  | 16.8 | y3  |
| sp P32119 PRDX2_HUMAN  | TDEGIAYR            | 119  | 126  | 462.724706 | 579.324922  | 16.8 | y5  |
| sp P32119 PRDX2_HUMAN  | TDEGIAYR            | 119  | 126  | 462.724706 | 708.367515  | 16.8 | y6  |
| sp P33241 LSP1_HUMAN   | WETGEVQAQSAAK       | 266  | 278  | 702.84133  | 575.314751  | 24   | y6  |
| sp P33241 LSP1_HUMAN   | WETGEVQAQSAAK       | 266  | 278  | 702.84133  | 802.441743  | 24   | y8  |
| sp P33241 LSP1_HUMAN   | WETGEVQAQSAAK       | 266  | 278  | 702.84133  | 988.505799  | 24   | y10 |
| sp P33241 LSP1_HUMAN   | WETGEVQAQSAAK       | 266  | 278  | 702.84133  | 1089.553478 | 24   | y11 |
| sp P34896 GLYC_HUMAN   | ALSEALTELGK         | 336  | 347  | 647.848092 | 609.324253  | 22.3 | y5  |
| sp P34896 GLYC_HUMAN   | ALSEALTELGK         | 336  | 347  | 647.848092 | 710.371932  | 22.3 | y6  |
| sp P34896 GLYC_HUMAN   | ALSEALTELGK         | 336  | 347  | 647.848092 | 823.455996  | 22.3 | y7  |
| sp P34896 GLYC_HUMAN   | ALSEALTELGK         | 336  | 347  | 647.848092 | 1110.567731 | 22.3 | y10 |
| sp P35573 GDE_HUMAN    | SGGGYIVVDPILR       | 101  | 113  | 673.377351 | 613.366787  | 23.1 | y5  |
| sp P35573 GDE_HUMAN    | SGGGYIVVDPILR       | 101  | 113  | 673.377351 | 712.435201  | 23.1 | y6  |

|                         |                           |     |     |            |             |      |     |
|-------------------------|---------------------------|-----|-----|------------|-------------|------|-----|
| sp P35573 GDE_HUMAN     | SGGGYIVVDPILR             | 101 | 113 | 673.377351 | 811.503615  | 23.1 | y7  |
| sp P35573 GDE_HUMAN     | SGGGYIVVDPILR             | 101 | 113 | 673.377351 | 924.587679  | 23.1 | y8  |
| sp P35908 K22E_HUMAN    | LNDLEEALQQAK              | 441 | 452 | 686.359356 | 474.267073  | 23.5 | y4  |
| sp P35908 K22E_HUMAN    | LNDLEEALQQAK              | 441 | 452 | 686.359356 | 658.38825   | 23.5 | y6  |
| sp P35908 K22E_HUMAN    | LNDLEEALQQAK              | 441 | 452 | 686.359356 | 787.430844  | 23.5 | y7  |
| sp P35908 K22E_HUMAN    | LNDLEEALQQAK              | 441 | 452 | 686.359356 | 916.473437  | 23.5 | y8  |
| sp P36551 HEM6_HUMAN    | AVVPSYIPLVK               | 359 | 369 | 593.365724 | 456.318046  | 20.7 | y4  |
| sp P36551 HEM6_HUMAN    | AVVPSYIPLVK               | 359 | 369 | 593.365724 | 569.40211   | 20.7 | y5  |
| sp P36551 HEM6_HUMAN    | AVVPSYIPLVK               | 359 | 369 | 593.365724 | 916.55023   | 20.7 | y8  |
| sp P36551 HEM6_HUMAN    | AVVPSYIPLVK               | 359 | 369 | 593.365724 | 1015.618644 | 20.7 | y9  |
| sp P36551 HEM6_HUMAN    | EAEILEVLR                 | 438 | 446 | 536.305863 | 387.27143   | 19   | y3  |
| sp P36551 HEM6_HUMAN    | EAEILEVLR                 | 438 | 446 | 536.305863 | 516.314023  | 19   | y4  |
| sp P36551 HEM6_HUMAN    | EAEILEVLR                 | 438 | 446 | 536.305863 | 629.398087  | 19   | y5  |
| sp P36551 HEM6_HUMAN    | EAEILEVLR                 | 438 | 446 | 536.305863 | 742.482151  | 19   | y6  |
| sp P38606 VATA_HUMAN    | TVISQSLSK                 | 256 | 264 | 481.779482 | 347.228896  | 17.4 | y3  |
| sp P38606 VATA_HUMAN    | TVISQSLSK                 | 256 | 264 | 481.779482 | 562.319502  | 17.4 | y5  |
| sp P38606 VATA_HUMAN    | TVISQSLSK                 | 256 | 264 | 481.779482 | 649.351531  | 17.4 | y6  |
| sp P38606 VATA_HUMAN    | TVISQSLSK                 | 256 | 264 | 481.779482 | 762.435595  | 17.4 | y7  |
| sp P39019 RS19_HUMAN    | IAGQVAAANK                | 133 | 142 | 471.771991 | 332.192845  | 17.1 | y3  |
| sp P39019 RS19_HUMAN    | IAGQVAAANK                | 133 | 142 | 471.771991 | 403.229959  | 17.1 | y4  |
| sp P39019 RS19_HUMAN    | IAGQVAAANK                | 133 | 142 | 471.771991 | 573.335487  | 17.1 | y6  |
| sp P39019 RS19_HUMAN    | IAGQVAAANK                | 133 | 142 | 471.771991 | 758.415528  | 17.1 | y8  |
| sp P39019 RS19_HUMAN    | VLQALEGLK                 | 102 | 110 | 485.800217 | 317.218332  | 17.5 | y3  |
| sp P39019 RS19_HUMAN    | VLQALEGLK                 | 102 | 110 | 485.800217 | 559.344989  | 17.5 | y5  |
| sp P39019 RS19_HUMAN    | VLQALEGLK                 | 102 | 110 | 485.800217 | 630.382102  | 17.5 | y6  |
| sp P39019 RS19_HUMAN    | VLQALEGLK                 | 102 | 110 | 485.800217 | 758.44068   | 17.5 | y7  |
| sp P41223 BUD31_HUMAN   | DTNFGTNC[+57.0]IC[+57.0]R | 109 | 119 | 679.284811 | 608.264313  | 23.3 | y4  |
| sp P41223 BUD31_HUMAN   | DTNFGTNC[+57.0]IC[+57.0]R | 109 | 119 | 679.284811 | 722.30724   | 23.3 | y5  |
| sp P41223 BUD31_HUMAN   | DTNFGTNC[+57.0]IC[+57.0]R | 109 | 119 | 679.284811 | 880.376382  | 23.3 | y7  |
| sp P41223 BUD31_HUMAN   | DTNFGTNC[+57.0]IC[+57.0]R | 109 | 119 | 679.284811 | 1027.444796 | 23.3 | y8  |
| sp P41227 NAA10_HUMAN   | DLSEVSETTESTDVK           | 210 | 224 | 820.380879 | 880.425818  | 27.5 | y8  |
| sp P41227 NAA10_HUMAN   | DLSEVSETTESTDVK           | 210 | 224 | 820.380879 | 1009.468411 | 27.5 | y9  |
| sp P41227 NAA10_HUMAN   | DLSEVSETTESTDVK           | 210 | 224 | 820.380879 | 1096.500439 | 27.5 | y10 |
| sp P41227 NAA10_HUMAN   | DLSEVSETTESTDVK           | 210 | 224 | 820.380879 | 1195.568853 | 27.5 | y11 |
| sp P42126 ECI1_HUMAN    | AVQELWLR                  | 126 | 133 | 507.790184 | 474.282329  | 18.1 | y3  |
| sp P42126 ECI1_HUMAN    | AVQELWLR                  | 126 | 133 | 507.790184 | 587.366393  | 18.1 | y4  |
| sp P42126 ECI1_HUMAN    | AVQELWLR                  | 126 | 133 | 507.790184 | 716.408986  | 18.1 | y5  |
| sp P42126 ECI1_HUMAN    | AVQELWLR                  | 126 | 133 | 507.790184 | 844.467563  | 18.1 | y6  |
| sp P46781 RS9_HUMAN     | IGVLDEGK                  | 83  | 90  | 415.734543 | 448.203804  | 15.4 | y4  |
| sp P46781 RS9_HUMAN     | IGVLDEGK                  | 83  | 90  | 415.734543 | 561.287868  | 15.4 | y5  |
| sp P46781 RS9_HUMAN     | IGVLDEGK                  | 83  | 90  | 415.734543 | 660.356282  | 15.4 | y6  |
| sp P46781 RS9_HUMAN     | IGVLDEGK                  | 83  | 90  | 415.734543 | 717.377745  | 15.4 | y7  |
| sp P46781 RS9_HUMAN     | LFEGNALLR                 | 70  | 78  | 516.795466 | 401.28708   | 18.4 | y3  |
| sp P46781 RS9_HUMAN     | LFEGNALLR                 | 70  | 78  | 516.795466 | 586.367121  | 18.4 | y5  |
| sp P46781 RS9_HUMAN     | LFEGNALLR                 | 70  | 78  | 516.795466 | 643.388585  | 18.4 | y6  |
| sp P46781 RS9_HUMAN     | LFEGNALLR                 | 70  | 78  | 516.795466 | 772.431178  | 18.4 | y7  |
| sp P46977 STT3A_HUMAN   | ENDYYTPTGEFR              | 613 | 624 | 746.32297  | 706.351865  | 25.3 | y6  |
| sp P46977 STT3A_HUMAN   | ENDYYTPTGEFR              | 613 | 624 | 746.32297  | 807.399543  | 25.3 | y7  |
| sp P46977 STT3A_HUMAN   | ENDYYTPTGEFR              | 613 | 624 | 746.32297  | 970.462872  | 25.3 | y8  |
| sp P46977 STT3A_HUMAN   | ENDYYTPTGEFR              | 613 | 624 | 746.32297  | 1133.526201 | 25.3 | y9  |
| sp P46977 STT3A_HUMAN   | FGQVYTEAK                 | 646 | 654 | 521.763831 | 448.240189  | 18.6 | y4  |
| sp P46977 STT3A_HUMAN   | FGQVYTEAK                 | 646 | 654 | 521.763831 | 611.303518  | 18.6 | y5  |
| sp P46977 STT3A_HUMAN   | FGQVYTEAK                 | 646 | 654 | 521.763831 | 710.371932  | 18.6 | y6  |
| sp P46977 STT3A_HUMAN   | FGQVYTEAK                 | 646 | 654 | 521.763831 | 838.430509  | 18.6 | y7  |
| sp P47756-2 CAPZB_HUMAN | STLNEIYFGK                | 225 | 234 | 586.303321 | 514.26601   | 20.5 | y4  |
| sp P47756-2 CAPZB_HUMAN | STLNEIYFGK                | 225 | 234 | 586.303321 | 627.350074  | 20.5 | y5  |
| sp P47756-2 CAPZB_HUMAN | STLNEIYFGK                | 225 | 234 | 586.303321 | 870.435595  | 20.5 | y7  |
| sp P47756-2 CAPZB_HUMAN | STLNEIYFGK                | 225 | 234 | 586.303321 | 983.519659  | 20.5 | y8  |
| sp P49321-3 NASP_HUMAN  | SIEVIENR                  | 609 | 616 | 480.261456 | 418.204472  | 17.3 | y3  |
| sp P49321-3 NASP_HUMAN  | SIEVIENR                  | 609 | 616 | 480.261456 | 531.288536  | 17.3 | y4  |
| sp P49321-3 NASP_HUMAN  | SIEVIENR                  | 609 | 616 | 480.261456 | 630.35695   | 17.3 | y5  |
| sp P49321-3 NASP_HUMAN  | SIEVIENR                  | 609 | 616 | 480.261456 | 759.399543  | 17.3 | y6  |
| sp P49747 COMP_HUMAN    | ELQETNAALQDVR             | 36  | 48  | 743.878444 | 517.272886  | 25.2 | y4  |
| sp P49747 COMP_HUMAN    | ELQETNAALQDVR             | 36  | 48  | 743.878444 | 630.35695   | 25.2 | y5  |
| sp P49747 COMP_HUMAN    | ELQETNAALQDVR             | 36  | 48  | 743.878444 | 701.394064  | 25.2 | y6  |

|                       |                           |      |      |            |             |      |     |
|-----------------------|---------------------------|------|------|------------|-------------|------|-----|
| sp P49747 COMP_HUMAN  | ELQETNAALQDVR             | 36   | 48   | 743.878444 | 772.431178  | 25.2 | y7  |
| sp P50238 CRIP1_HUMAN | EVYFAER                   | 9    | 15   | 457.224342 | 304.161545  | 16.6 | y2  |
| sp P50238 CRIP1_HUMAN | EVYFAER                   | 9    | 15   | 457.224342 | 375.198659  | 16.6 | y3  |
| sp P50238 CRIP1_HUMAN | EVYFAER                   | 9    | 15   | 457.224342 | 522.267073  | 16.6 | y4  |
| sp P50238 CRIP1_HUMAN | EVYFAER                   | 9    | 15   | 457.224342 | 685.330401  | 16.6 | y5  |
| sp P50552 VASP_HUMAN  | DESANQEEPEAR              | 286  | 297  | 687.792034 | 472.251423  | 23.5 | y4  |
| sp P50552 VASP_HUMAN  | DESANQEEPEAR              | 286  | 297  | 687.792034 | 601.294016  | 23.5 | y5  |
| sp P50552 VASP_HUMAN  | DESANQEEPEAR              | 286  | 297  | 687.792034 | 730.336609  | 23.5 | y6  |
| sp P50552 VASP_HUMAN  | DESANQEEPEAR              | 286  | 297  | 687.792034 | 972.438114  | 23.5 | y8  |
| sp P51553 IDH3G_HUMAN | DIDILIVR                  | 159  | 166  | 478.792392 | 387.27143   | 17.3 | y3  |
| sp P51553 IDH3G_HUMAN | DIDILIVR                  | 159  | 166  | 478.792392 | 500.355494  | 17.3 | y4  |
| sp P51553 IDH3G_HUMAN | DIDILIVR                  | 159  | 166  | 478.792392 | 613.439558  | 17.3 | y5  |
| sp P51553 IDH3G_HUMAN | DIDILIVR                  | 159  | 166  | 478.792392 | 728.466501  | 17.3 | y6  |
| sp P51553 IDH3G_HUMAN | LGDGLFLQC[+57.0]C[+57.0]R | 226  | 236  | 669.818289 | 495.180249  | 23   | y3  |
| sp P51553 IDH3G_HUMAN | LGDGLFLQC[+57.0]C[+57.0]R | 226  | 236  | 669.818289 | 623.238826  | 23   | y4  |
| sp P51553 IDH3G_HUMAN | LGDGLFLQC[+57.0]C[+57.0]R | 226  | 236  | 669.818289 | 736.32289   | 23   | y5  |
| sp P51553 IDH3G_HUMAN | LGDGLFLQC[+57.0]C[+57.0]R | 226  | 236  | 669.818289 | 883.391304  | 23   | y6  |
| sp P51809 VAMP7_HUMAN | AFNFLNEIK                 | 74   | 82   | 548.295299 | 503.282388  | 19.4 | y4  |
| sp P51809 VAMP7_HUMAN | AFNFLNEIK                 | 74   | 82   | 548.295299 | 616.366452  | 19.4 | y5  |
| sp P51809 VAMP7_HUMAN | AFNFLNEIK                 | 74   | 82   | 548.295299 | 763.434866  | 19.4 | y6  |
| sp P51809 VAMP7_HUMAN | AFNFLNEIK                 | 125  | 136  | 548.295299 | 877.477794  | 19.4 | y7  |
| sp P51809 VAMP7_HUMAN | VMETQAQVDELK              | 125  | 136  | 695.847767 | 504.266404  | 23.8 | y4  |
| sp P51809 VAMP7_HUMAN | VMETQAQVDELK              | 125  | 136  | 695.847767 | 802.430509  | 23.8 | y7  |
| sp P51809 VAMP7_HUMAN | VMETQAQVDELK              | 125  | 136  | 695.847767 | 1031.536765 | 23.8 | y9  |
| sp P51809 VAMP7_HUMAN | VMETQAQVDELK              | 125  | 136  | 695.847767 | 1160.579358 | 23.8 | y10 |
| sp P51911 CNN1_HUMAN  | EWIEGVTGR                 | 35   | 43   | 523.766905 | 333.188094  | 18.6 | y3  |
| sp P51911 CNN1_HUMAN  | EWIEGVTGR                 | 35   | 43   | 523.766905 | 432.256508  | 18.6 | y4  |
| sp P51911 CNN1_HUMAN  | EWIEGVTGR                 | 35   | 43   | 523.766905 | 489.277972  | 18.6 | y5  |
| sp P51911 CNN1_HUMAN  | EWIEGVTGR                 | 35   | 43   | 523.766905 | 618.320565  | 18.6 | y6  |
| sp P52434 RPAB3_HUMAN | IEGDETSTEAATR             | 98   | 110  | 690.317885 | 648.33113   | 23.6 | y6  |
| sp P52434 RPAB3_HUMAN | IEGDETSTEAATR             | 98   | 110  | 690.317885 | 735.363158  | 23.6 | y7  |
| sp P52434 RPAB3_HUMAN | IEGDETSTEAATR             | 98   | 110  | 690.317885 | 836.410836  | 23.6 | y8  |
| sp P52434 RPAB3_HUMAN | IEGDETSTEAATR             | 98   | 110  | 690.317885 | 1137.501836 | 23.6 | y11 |
| sp P53999 TCP4_HUMAN  | EQISDIDDAVR               | 114  | 124  | 630.806956 | 575.278366  | 21.8 | y5  |
| sp P53999 TCP4_HUMAN  | EQISDIDDAVR               | 114  | 124  | 630.806956 | 688.36243   | 21.8 | y6  |
| sp P53999 TCP4_HUMAN  | EQISDIDDAVR               | 114  | 124  | 630.806956 | 803.389373  | 21.8 | y7  |
| sp P53999 TCP4_HUMAN  | EQISDIDDAVR               | 114  | 124  | 630.806956 | 890.421401  | 21.8 | y8  |
| sp P55268 LAMB2_HUMAN | LGIVQGIVGAR               | 620  | 629  | 541.837665 | 799.478462  | 19.2 | y8  |
| sp P55268 LAMB2_HUMAN | LGIVQGIVGAR               | 1237 | 1247 | 541.837665 | 402.245943  | 19.2 | y4  |
| sp P55268 LAMB2_HUMAN | LGIVQGIVGAR               | 1237 | 1247 | 541.837665 | 572.351471  | 19.2 | y6  |
| sp P55268 LAMB2_HUMAN | LGIVQGIVGAR               | 1237 | 1247 | 541.837665 | 700.410049  | 19.2 | y7  |
| sp P57737 CORO7_HUMAN | IWDLQAGADR                | 620  | 629  | 572.790912 | 418.204472  | 20.1 | y4  |
| sp P57737 CORO7_HUMAN | IWDLQAGADR                | 620  | 629  | 572.790912 | 489.241586  | 20.1 | y5  |
| sp P57737 CORO7_HUMAN | IWDLQAGADR                | 620  | 629  | 572.790912 | 617.300164  | 20.1 | y6  |
| sp P57737 CORO7_HUMAN | IWDLQAGADR                | 620  | 629  | 572.790912 | 845.411171  | 20.1 | y8  |
| sp P57737 CORO7_HUMAN | SLQSLLGPSSK               | 461  | 471  | 558.816595 | 418.229624  | 19.7 | y4  |
| sp P57737 CORO7_HUMAN | SLQSLLGPSSK               | 461  | 471  | 558.816595 | 475.251088  | 19.7 | y5  |
| sp P57737 CORO7_HUMAN | SLQSLLGPSSK               | 461  | 471  | 558.816595 | 588.335152  | 19.7 | y6  |
| sp P57737 CORO7_HUMAN | SLQSLLGPSSK               | 461  | 471  | 558.816595 | 788.451245  | 19.7 | y8  |
| sp P58107 EPIPL_HUMAN | AEIIDQDLYER               | 574  | 584  | 682.838256 | 938.421401  | 23.4 | y7  |
| sp P58107 EPIPL_HUMAN | AEIIDQDLYER               | 574  | 584  | 682.838256 | 1051.505465 | 23.4 | y8  |
| sp P58107 EPIPL_HUMAN | AEIIDQDLYER               | 574  | 584  | 682.838256 | 1164.589529 | 23.4 | y9  |
| sp P58107 EPIPL_HUMAN | ALQQGLVGLLELK             | 97   | 108  | 634.88227  | 559.344989  | 22   | y5  |
| sp P58107 EPIPL_HUMAN | ALQQGLVGLLELK             | 97   | 108  | 634.88227  | 658.413403  | 22   | y6  |
| sp P58107 EPIPL_HUMAN | ALQQGLVGLLELK             | 97   | 108  | 634.88227  | 828.51893   | 22   | y8  |
| sp P58107 EPIPL_HUMAN | ALQQGLVGLLELK             | 97   | 108  | 634.88227  | 956.577508  | 22   | y9  |
| sp P59665 DEF1_HUMAN  | YGTC[+57.0]IYQGR          | 79   | 87   | 559.25839  | 360.198993  | 19.7 | y3  |
| sp P59665 DEF1_HUMAN  | YGTC[+57.0]IYQGR          | 79   | 87   | 559.25839  | 523.262322  | 19.7 | y4  |
| sp P59665 DEF1_HUMAN  | YGTC[+57.0]IYQGR          | 79   | 87   | 559.25839  | 636.346386  | 19.7 | y5  |
| sp P59665 DEF1_HUMAN  | YGTC[+57.0]IYQGR          | 79   | 87   | 559.25839  | 796.377034  | 19.7 | y6  |
| sp P60866 RS20_HUMAN  | LIDLHSPSEIVK              | 87   | 98   | 675.885009 | 759.424696  | 23.2 | y7  |
| sp P60866 RS20_HUMAN  | LIDLHSPSEIVK              | 87   | 98   | 675.885009 | 896.483607  | 23.2 | y8  |
| sp P60866 RS20_HUMAN  | LIDLHSPSEIVK              | 87   | 98   | 675.885009 | 1009.567671 | 23.2 | y9  |
| sp P60866 RS20_HUMAN  | LIDLHSPSEIVK              | 87   | 98   | 675.885009 | 1124.594615 | 23.2 | y10 |
| sp P60903 S10AA_HUMAN | EFPGFLENQK                | 37   | 46   | 604.800945 | 389.214309  | 21   | y3  |



|                         |                      |     |     |            |             |      |     |
|-------------------------|----------------------|-----|-----|------------|-------------|------|-----|
| sp P60903 S10AA_HUMAN   | EFPGFLENQK           | 37  | 46  | 604.800945 | 518.256902  | 21   | y4  |
| sp P60903 S10AA_HUMAN   | EFPGFLENQK           | 37  | 46  | 604.800945 | 631.340966  | 21   | y5  |
| sp P60903 S10AA_HUMAN   | EFPGFLENQK           | 37  | 46  | 604.800945 | 932.483607  | 21   | y8  |
| sp P61077-3 UB2D3_HUMAN | SQWSPALTISK          | 90  | 100 | 609.32987  | 448.276575  | 21.2 | y4  |
| sp P61077-3 UB2D3_HUMAN | SQWSPALTISK          | 90  | 100 | 609.32987  | 729.450516  | 21.2 | y7  |
| sp P61077-3 UB2D3_HUMAN | SQWSPALTISK          | 90  | 100 | 609.32987  | 816.482545  | 21.2 | y8  |
| sp P61077-3 UB2D3_HUMAN | SQWSPALTISK          | 90  | 100 | 609.32987  | 1002.561858 | 21.2 | y9  |
| sp P61604 CH10_HUMAN    | GGEIQPVSVK           | 56  | 65  | 507.284931 | 333.213246  | 18.1 | y3  |
| sp P61604 CH10_HUMAN    | GGEIQPVSVK           | 56  | 65  | 507.284931 | 529.334424  | 18.1 | y5  |
| sp P61604 CH10_HUMAN    | GGEIQPVSVK           | 56  | 65  | 507.284931 | 657.393001  | 18.1 | y6  |
| sp P61604 CH10_HUMAN    | GGEIQPVSVK           | 56  | 65  | 507.284931 | 770.477066  | 18.1 | y7  |
| sp P61604 CH10_HUMAN    | VLLPEYGGTK           | 70  | 79  | 538.802957 | 525.266738  | 19.1 | y5  |
| sp P61604 CH10_HUMAN    | VLLPEYGGTK           | 70  | 79  | 538.802957 | 751.362095  | 19.1 | y7  |
| sp P61604 CH10_HUMAN    | VLLPEYGGTK           | 70  | 79  | 538.802957 | 864.446159  | 19.1 | y8  |
| sp P61604 CH10_HUMAN    | VLLPEYGGTK           | 70  | 79  | 538.802957 | 977.530223  | 19.1 | y9  |
| sp P61769 B2MG_HUMAN    | VEHSDLSFSK           | 68  | 77  | 574.782753 | 581.329339  | 20.1 | y5  |
| sp P61769 B2MG_HUMAN    | VEHSDLSFSK           | 68  | 77  | 574.782753 | 696.356282  | 20.1 | y6  |
| sp P61769 B2MG_HUMAN    | VEHSDLSFSK           | 68  | 77  | 574.782753 | 783.38831   | 20.1 | y7  |
| sp P61769 B2MG_HUMAN    | VEHSDLSFSK           | 68  | 77  | 574.782753 | 920.447222  | 20.1 | y8  |
| sp P61981 1433G_HUMAN   | YLAEVATGEK           | 132 | 141 | 540.782221 | 505.261653  | 19.1 | y5  |
| sp P61981 1433G_HUMAN   | YLAEVATGEK           | 132 | 141 | 540.782221 | 604.330067  | 19.1 | y6  |
| sp P61981 1433G_HUMAN   | YLAEVATGEK           | 132 | 141 | 540.782221 | 733.37266   | 19.1 | y7  |
| sp P61981 1433G_HUMAN   | YLAEVATGEK           | 132 | 141 | 540.782221 | 804.409774  | 19.1 | y8  |
| sp P62424 RL7A_HUMAN    | AGVNTVTTLVENK        | 137 | 149 | 673.369723 | 489.266738  | 23.1 | y4  |
| sp P62424 RL7A_HUMAN    | AGVNTVTTLVENK        | 137 | 149 | 673.369723 | 703.398481  | 23.1 | y6  |
| sp P62424 RL7A_HUMAN    | AGVNTVTTLVENK        | 137 | 149 | 673.369723 | 804.446159  | 23.1 | y7  |
| sp P62424 RL7A_HUMAN    | AGVNTVTTLVENK        | 137 | 149 | 673.369723 | 903.514573  | 23.1 | y8  |
| sp P62750 RL23A_HUMAN   | LAPDYDALDVANK        | 139 | 151 | 702.853906 | 546.288202  | 24   | y5  |
| sp P62750 RL23A_HUMAN   | LAPDYDALDVANK        | 139 | 151 | 702.853906 | 730.40938   | 24   | y7  |
| sp P62750 RL23A_HUMAN   | LAPDYDALDVANK        | 139 | 151 | 702.853906 | 1008.499651 | 24   | y9  |
| sp P62750 RL23A_HUMAN   | LAPDYDALDVANK        | 139 | 151 | 702.853906 | 1220.579358 | 24   | y11 |
| sp P62829 RL23_HUMAN    | NLYIISVK             | 35  | 42  | 475.289485 | 333.213246  | 17.2 | y3  |
| sp P62829 RL23_HUMAN    | NLYIISVK             | 35  | 42  | 475.289485 | 446.29731   | 17.2 | y4  |
| sp P62829 RL23_HUMAN    | NLYIISVK             | 35  | 42  | 475.289485 | 559.381374  | 17.2 | y5  |
| sp P62829 RL23_HUMAN    | NLYIISVK             | 35  | 42  | 475.289485 | 722.444703  | 17.2 | y6  |
| sp P62834 RAP1A_HUMAN   | LVVLGSGGVGK          | 104 | 116 | 493.305666 | 504.277637  | 17.7 | y6  |
| sp P62834 RAP1A_HUMAN   | LVVLGSGGVGK          | 104 | 116 | 493.305666 | 561.299101  | 17.7 | y7  |
| sp P62834 RAP1A_HUMAN   | LVVLGSGGVGK          | 104 | 116 | 493.305666 | 674.383165  | 17.7 | y8  |
| sp P62834 RAP1A_HUMAN   | LVVLGSGGVGK          | 104 | 116 | 493.305666 | 773.451579  | 17.7 | y9  |
| sp P62851 RS25_HUMAN    | AALQELLSK            | 85  | 93  | 486.789849 | 460.31296   | 17.5 | y4  |
| sp P62851 RS25_HUMAN    | AALQELLSK            | 85  | 93  | 486.789849 | 589.355553  | 17.5 | y5  |
| sp P62851 RS25_HUMAN    | AALQELLSK            | 85  | 93  | 486.789849 | 717.414131  | 17.5 | y6  |
| sp P62851 RS25_HUMAN    | AALQELLSK            | 85  | 93  | 486.789849 | 830.498195  | 17.5 | y7  |
| sp P62851 RS25_HUMAN    | LNNLVLFDK            | 43  | 51  | 538.310949 | 409.208161  | 19.1 | y3  |
| sp P62851 RS25_HUMAN    | LNNLVLFDK            | 43  | 51  | 538.310949 | 522.292225  | 19.1 | y4  |
| sp P62851 RS25_HUMAN    | LNNLVLFDK            | 43  | 51  | 538.310949 | 621.360639  | 19.1 | y5  |
| sp P62851 RS25_HUMAN    | LNNLVLFDK            | 43  | 51  | 538.310949 | 848.48763   | 19.1 | y7  |
| sp P62888 RL30_HUMAN    | LVILANNC[+57.0]PALR  | 44  | 55  | 677.387196 | 456.292893  | 23.2 | y4  |
| sp P62888 RL30_HUMAN    | LVILANNC[+57.0]PALR  | 44  | 55  | 677.387196 | 730.366469  | 23.2 | y6  |
| sp P62888 RL30_HUMAN    | LVILANNC[+57.0]PALR  | 44  | 55  | 677.387196 | 844.409397  | 23.2 | y7  |
| sp P62888 RL30_HUMAN    | LVILANNC[+57.0]PALR  | 44  | 55  | 677.387196 | 915.446511  | 23.2 | y8  |
| sp P62888 RL30_HUMAN    | SEIEYYAMLAK          | 57  | 67  | 659.323396 | 696.374909  | 22.7 | y6  |
| sp P62888 RL30_HUMAN    | SEIEYYAMLAK          | 57  | 67  | 659.323396 | 859.438237  | 22.7 | y7  |
| sp P62888 RL30_HUMAN    | SEIEYYAMLAK          | 57  | 67  | 659.323396 | 988.48083   | 22.7 | y8  |
| sp P62888 RL30_HUMAN    | SEIEYYAMLAK          | 57  | 67  | 659.323396 | 1101.564894 | 22.7 | y9  |
| sp P67809 YBOX1_HUMAN   | GAEAAANVTGPGGVPVQGSK | 118 | 136 | 848.436657 | 615.346051  | 28.4 | y6  |
| sp P67809 YBOX1_HUMAN   | GAEAAANVTGPGGVPVQGSK | 118 | 136 | 848.436657 | 925.510157  | 28.4 | y10 |
| sp P67809 YBOX1_HUMAN   | GAEAAANVTGPGGVPVQGSK | 118 | 136 | 848.436657 | 982.53162   | 28.4 | y11 |
| sp P67809 YBOX1_HUMAN   | GAEAAANVTGPGGVPVQGSK | 118 | 136 | 848.436657 | 1083.579299 | 28.4 | y12 |
| sp P67809 YBOX1_HUMAN   | NEGSESAPEGQAQQR      | 170 | 184 | 794.353322 | 687.353262  | 26.7 | y6  |
| sp P67809 YBOX1_HUMAN   | NEGSESAPEGQAQQR      | 170 | 184 | 794.353322 | 913.448619  | 26.7 | y8  |
| sp P67809 YBOX1_HUMAN   | NEGSESAPEGQAQQR      | 170 | 184 | 794.353322 | 984.485733  | 26.7 | y9  |
| sp P67809 YBOX1_HUMAN   | NEGSESAPEGQAQQR      | 170 | 184 | 794.353322 | 1071.517761 | 26.7 | y10 |
| sp P68431 H31_HUMAN     | STELLIR              | 57  | 63  | 416.25036  | 401.28708   | 15.4 | y3  |
| sp P68431 H31_HUMAN     | STELLIR              | 57  | 63  | 416.25036  | 514.371144  | 15.4 | y4  |

|                        |                   |      |      |            |             |      |     |
|------------------------|-------------------|------|------|------------|-------------|------|-----|
| sp P68431 H31_HUMAN    | STELLIR           | 57   | 63   | 416.25036  | 544.297704  | 15.4 | b5  |
| sp P78347 GTF2I_HUMAN  | IIQVGNR           | 577  | 583  | 400.242869 | 346.183343  | 14.9 | y3  |
| sp P78347 GTF2I_HUMAN  | IIQVGNR           | 577  | 583  | 400.242869 | 445.251757  | 14.9 | y4  |
| sp P78347 GTF2I_HUMAN  | IIQVGNR           | 577  | 583  | 400.242869 | 573.310334  | 14.9 | y5  |
| sp P78347 GTF2I_HUMAN  | IIQVGNR           | 577  | 583  | 400.242869 | 686.394398  | 14.9 | y6  |
| sp P80217-2 IN35_HUMAN | VAEQVLQKQ         | 89   | 97   | 521.798206 | 403.229959  | 18.6 | y3  |
| sp P80217-2 IN35_HUMAN | VAEQVLQKQ         | 89   | 97   | 521.798206 | 516.314023  | 18.6 | y4  |
| sp P80217-2 IN35_HUMAN | VAEQVLQKQ         | 89   | 97   | 521.798206 | 615.382437  | 18.6 | y5  |
| sp P80217-2 IN35_HUMAN | VAEQVLQKQ         | 89   | 97   | 521.798206 | 743.441014  | 18.6 | y6  |
| sp P80303 NUCB2_HUMAN  | LVTLEEFK          | 311  | 319  | 546.320982 | 407.265282  | 19.3 | y3  |
| sp P80303 NUCB2_HUMAN  | LVTLEEFK          | 311  | 319  | 546.320982 | 665.350468  | 19.3 | y5  |
| sp P80303 NUCB2_HUMAN  | LVTLEEFK          | 311  | 319  | 546.320982 | 778.434532  | 19.3 | y6  |
| sp P80303 NUCB2_HUMAN  | LVTLEEFK          | 311  | 319  | 546.320982 | 879.482211  | 19.3 | y7  |
| sp Q00325-2 MPCP_HUMAN | FGFYEVFK          | 137  | 144  | 518.76056  | 393.249632  | 18.5 | y3  |
| sp Q00325-2 MPCP_HUMAN | FGFYEVFK          | 137  | 144  | 518.76056  | 685.355553  | 18.5 | y5  |
| sp Q00325-2 MPCP_HUMAN | FGFYEVFK          | 137  | 144  | 518.76056  | 832.423967  | 18.5 | y6  |
| sp Q00325-2 MPCP_HUMAN | FGFYEVFK          | 137  | 144  | 518.76056  | 889.445431  | 18.5 | y7  |
| sp Q00325-2 MPCP_HUMAN | IQTQPGYANTLR      | 189  | 200  | 681.362233 | 794.415528  | 23.3 | y7  |
| sp Q00325-2 MPCP_HUMAN | IQTQPGYANTLR      | 189  | 200  | 681.362233 | 891.468292  | 23.3 | y8  |
| sp Q00325-2 MPCP_HUMAN | IQTQPGYANTLR      | 189  | 200  | 681.362233 | 1019.526869 | 23.3 | y9  |
| sp Q00325-2 MPCP_HUMAN | IQTQPGYANTLR      | 189  | 200  | 681.362233 | 1120.574548 | 23.3 | y10 |
| sp Q01844 EWS_HUMAN    | AAVEWFDGK         | 424  | 432  | 511.750724 | 466.229624  | 18.3 | y4  |
| sp Q01844 EWS_HUMAN    | AAVEWFDGK         | 424  | 432  | 511.750724 | 652.308937  | 18.3 | y5  |
| sp Q01844 EWS_HUMAN    | AAVEWFDGK         | 424  | 432  | 511.750724 | 781.351531  | 18.3 | y6  |
| sp Q01844 EWS_HUMAN    | AAVEWFDGK         | 424  | 432  | 511.750724 | 880.419945  | 18.3 | y7  |
| sp Q01844 EWS_HUMAN    | GDATVSYEDPPTAK    | 410  | 423  | 725.838453 | 513.303124  | 24.7 | y5  |
| sp Q01844 EWS_HUMAN    | GDATVSYEDPPTAK    | 410  | 423  | 725.838453 | 628.330067  | 24.7 | y6  |
| sp Q01844 EWS_HUMAN    | GDATVSYEDPPTAK    | 410  | 423  | 725.838453 | 920.435989  | 24.7 | y8  |
| sp Q01844 EWS_HUMAN    | GDATVSYEDPPTAK    | 410  | 423  | 725.838453 | 1007.468017 | 24.7 | y9  |
| sp Q02224 CENPE_HUMAN  | NDLDEFEALER       | 531  | 541  | 675.812238 | 488.282723  | 23.2 | y4  |
| sp Q02224 CENPE_HUMAN  | NDLDEFEALER       | 531  | 541  | 675.812238 | 617.325316  | 23.2 | y5  |
| sp Q02224 CENPE_HUMAN  | NDLDEFEALER       | 531  | 541  | 675.812238 | 764.39373   | 23.2 | y6  |
| sp Q02224 CENPE_HUMAN  | NDLDEFEALER       | 531  | 541  | 675.812238 | 1008.463266 | 23.2 | y8  |
| sp Q02224 CENPE_HUMAN  | SLFILGQVIK        | 260  | 269  | 559.352617 | 544.345323  | 19.7 | y5  |
| sp Q02224 CENPE_HUMAN  | SLFILGQVIK        | 260  | 269  | 559.352617 | 657.429387  | 19.7 | y6  |
| sp Q02224 CENPE_HUMAN  | SLFILGQVIK        | 260  | 269  | 559.352617 | 770.513451  | 19.7 | y7  |
| sp Q02224 CENPE_HUMAN  | SLFILGQVIK        | 260  | 269  | 559.352617 | 917.581865  | 19.7 | y8  |
| sp Q02252 MMSA_HUMAN   | TLADAEGDVFR       | 129  | 139  | 597.293484 | 421.25578   | 20.8 | y3  |
| sp Q02252 MMSA_HUMAN   | TLADAEGDVFR       | 129  | 139  | 597.293484 | 722.34678   | 20.8 | y6  |
| sp Q02252 MMSA_HUMAN   | TLADAEGDVFR       | 129  | 139  | 597.293484 | 793.383893  | 20.8 | y7  |
| sp Q02252 MMSA_HUMAN   | TLADAEGDVFR       | 129  | 139  | 597.293484 | 979.44795   | 20.8 | y9  |
| sp Q03518 TAP1_HUMAN   | SFANEEGEAQK       | 438  | 448  | 605.272749 | 532.272552  | 21.1 | y5  |
| sp Q03518 TAP1_HUMAN   | SFANEEGEAQK       | 438  | 448  | 605.272749 | 661.315145  | 21.1 | y6  |
| sp Q03518 TAP1_HUMAN   | SFANEEGEAQK       | 438  | 448  | 605.272749 | 904.400666  | 21.1 | y8  |
| sp Q03518 TAP1_HUMAN   | SFANEEGEAQK       | 438  | 448  | 605.272749 | 975.43778   | 21.1 | y9  |
| sp Q04695 K1C17_HUMAN  | DAEDWFFSK         | 269  | 277  | 572.750921 | 528.28166   | 20.1 | y4  |
| sp Q04695 K1C17_HUMAN  | DAEDWFFSK         | 269  | 277  | 572.750921 | 714.360973  | 20.1 | y5  |
| sp Q04695 K1C17_HUMAN  | DAEDWFFSK         | 269  | 277  | 572.750921 | 829.387916  | 20.1 | y6  |
| sp Q04695 K1C17_HUMAN  | DAEDWFFSK         | 269  | 277  | 572.750921 | 958.430509  | 20.1 | y7  |
| sp Q04917 1433F_HUMAN  | NC[+57.0]NDFQYESK | 110  | 119  | 652.764234 | 526.250754  | 22.5 | y4  |
| sp Q04917 1433F_HUMAN  | NC[+57.0]NDFQYESK | 110  | 119  | 652.764234 | 801.377745  | 22.5 | y6  |
| sp Q04917 1433F_HUMAN  | NC[+57.0]NDFQYESK | 110  | 119  | 652.764234 | 916.404688  | 22.5 | y7  |
| sp Q04917 1433F_HUMAN  | NC[+57.0]NDFQYESK | 110  | 119  | 652.764234 | 1030.447616 | 22.5 | y8  |
| sp Q07507 DERM_HUMAN   | YFESVLDR          | 118  | 125  | 514.756006 | 403.229959  | 18.3 | y3  |
| sp Q07507 DERM_HUMAN   | YFESVLDR          | 118  | 125  | 514.756006 | 502.298373  | 18.3 | y4  |
| sp Q07507 DERM_HUMAN   | YFESVLDR          | 118  | 125  | 514.756006 | 589.330401  | 18.3 | y5  |
| sp Q07507 DERM_HUMAN   | YFESVLDR          | 118  | 125  | 514.756006 | 718.372994  | 18.3 | y6  |
| sp Q07954 LRP1_HUMAN   | AALSGANVLTIEK     | 2360 | 2373 | 700.411391 | 389.239461  | 23.9 | y3  |
| sp Q07954 LRP1_HUMAN   | AALSGANVLTIEK     | 2360 | 2373 | 700.411391 | 502.323525  | 23.9 | y4  |
| sp Q07954 LRP1_HUMAN   | AALSGANVLTIEK     | 2360 | 2373 | 700.411391 | 716.455267  | 23.9 | y6  |
| sp Q07954 LRP1_HUMAN   | AALSGANVLTIEK     | 2360 | 2373 | 700.411391 | 1144.657215 | 23.9 | y11 |
| sp Q08380 LG3BP_HUMAN  | SQLVYQSR          | 427  | 434  | 490.761623 | 390.209558  | 17.6 | y3  |
| sp Q08380 LG3BP_HUMAN  | SQLVYQSR          | 427  | 434  | 490.761623 | 553.272886  | 17.6 | y4  |
| sp Q08380 LG3BP_HUMAN  | SQLVYQSR          | 427  | 434  | 490.761623 | 652.3413    | 17.6 | y5  |
| sp Q08380 LG3BP_HUMAN  | SQLVYQSR          | 427  | 434  | 490.761623 | 765.425364  | 17.6 | y6  |

|                        |                              |     |     |            |             |      |     |
|------------------------|------------------------------|-----|-----|------------|-------------|------|-----|
| sp Q12846 STX4_HUMAN   | NILSSADYVER                  | 243 | 253 | 633.819866 | 681.32023   | 21.9 | y5  |
| sp Q12846 STX4_HUMAN   | NILSSADYVER                  | 243 | 253 | 633.819866 | 839.389373  | 21.9 | y7  |
| sp Q12846 STX4_HUMAN   | NILSSADYVER                  | 243 | 253 | 633.819866 | 926.421401  | 21.9 | y8  |
| sp Q12846 STX4_HUMAN   | NILSSADYVER                  | 243 | 253 | 633.819866 | 1039.505465 | 21.9 | y9  |
| sp Q13011 ECH1_HUMAN   | YQETFNVIER                   | 148 | 157 | 649.822409 | 630.35695   | 22.4 | y5  |
| sp Q13011 ECH1_HUMAN   | YQETFNVIER                   | 148 | 157 | 649.822409 | 777.425364  | 22.4 | y6  |
| sp Q13011 ECH1_HUMAN   | YQETFNVIER                   | 148 | 157 | 649.822409 | 878.473043  | 22.4 | y7  |
| sp Q13011 ECH1_HUMAN   | YQETFNVIER                   | 148 | 157 | 649.822409 | 1007.515636 | 22.4 | y8  |
| sp Q13547 HDAC1_HUMAN  | LGC[+57.0]FNLTIK             | 270 | 278 | 533.291702 | 588.371538  | 18.9 | y5  |
| sp Q13547 HDAC1_HUMAN  | LGC[+57.0]FNLTIK             | 270 | 278 | 533.291702 | 735.439952  | 18.9 | y6  |
| sp Q13547 HDAC1_HUMAN  | LGC[+57.0]FNLTIK             | 270 | 278 | 533.291702 | 895.4706    | 18.9 | y7  |
| sp Q13547 HDAC1_HUMAN  | LGC[+57.0]FNLTIK             | 270 | 278 | 533.291702 | 952.492064  | 18.9 | y8  |
| sp Q13547 HDAC1_HUMAN  | YYAVNYPLR                    | 220 | 228 | 579.800748 | 548.319108  | 20.3 | y4  |
| sp Q13547 HDAC1_HUMAN  | YYAVNYPLR                    | 220 | 228 | 579.800748 | 662.362036  | 20.3 | y5  |
| sp Q13547 HDAC1_HUMAN  | YYAVNYPLR                    | 220 | 228 | 579.800748 | 761.43045   | 20.3 | y6  |
| sp Q13547 HDAC1_HUMAN  | YYAVNYPLR                    | 220 | 228 | 579.800748 | 832.467563  | 20.3 | y7  |
| sp Q13610 PWP1_HUMAN   | NSSISGPFGR                   | 482 | 492 | 554.772719 | 620.315085  | 19.5 | y6  |
| sp Q13610 PWP1_HUMAN   | NSSISGPFGR                   | 482 | 492 | 554.772719 | 707.347114  | 19.5 | y7  |
| sp Q13610 PWP1_HUMAN   | NSSISGPFGR                   | 482 | 492 | 554.772719 | 820.431178  | 19.5 | y8  |
| sp Q13610 PWP1_HUMAN   | NSSISGPFGR                   | 482 | 492 | 554.772719 | 907.463206  | 19.5 | y9  |
| sp Q13642-1 FHL1_HUMAN | AIVAGDQNVYK                  | 106 | 117 | 653.835516 | 439.218725  | 22.5 | y3  |
| sp Q13642-1 FHL1_HUMAN | AIVAGDQNVYK                  | 106 | 117 | 653.835516 | 952.437051  | 22.5 | y8  |
| sp Q13642-1 FHL1_HUMAN | AIVAGDQNVYK                  | 106 | 117 | 653.835516 | 1023.474165 | 22.5 | y9  |
| sp Q13642-1 FHL1_HUMAN | AIVAGDQNVYK                  | 106 | 117 | 653.835516 | 1122.542579 | 22.5 | y10 |
| sp Q13642-1 FHL1_HUMAN | QVIGTGSFFPK                  | 133 | 143 | 590.821681 | 625.334424  | 20.6 | y5  |
| sp Q13642-1 FHL1_HUMAN | QVIGTGSFFPK                  | 133 | 143 | 590.821681 | 682.355888  | 20.6 | y6  |
| sp Q13642-1 FHL1_HUMAN | QVIGTGSFFPK                  | 133 | 143 | 590.821681 | 840.42503   | 20.6 | y8  |
| sp Q13642-1 FHL1_HUMAN | QVIGTGSFFPK                  | 133 | 143 | 590.821681 | 953.509094  | 20.6 | y9  |
| sp Q14108 SCR2_HUMAN   | VEEVGPYTYR                   | 82  | 91  | 606.798403 | 699.346051  | 21.1 | y5  |
| sp Q14108 SCR2_HUMAN   | VEEVGPYTYR                   | 82  | 91  | 606.798403 | 756.367515  | 21.1 | y6  |
| sp Q14108 SCR2_HUMAN   | VEEVGPYTYR                   | 82  | 91  | 606.798403 | 855.435929  | 21.1 | y7  |
| sp Q14108 SCR2_HUMAN   | VEEVGPYTYR                   | 82  | 91  | 606.798403 | 984.478522  | 21.1 | y8  |
| sp Q14956 GPNMB_HUMAN  | AYVPIAQVK                    | 218 | 226 | 494.794935 | 374.239795  | 17.7 | y3  |
| sp Q14956 GPNMB_HUMAN  | AYVPIAQVK                    | 218 | 226 | 494.794935 | 445.276909  | 17.7 | y4  |
| sp Q14956 GPNMB_HUMAN  | AYVPIAQVK                    | 218 | 226 | 494.794935 | 655.413737  | 17.7 | y6  |
| sp Q14956 GPNMB_HUMAN  | AYVPIAQVK                    | 218 | 226 | 494.794935 | 754.482151  | 17.7 | y7  |
| sp Q15102 PA1B3_HUMAN  | AIVQLVNER                    | 118 | 126 | 521.306198 | 418.204472  | 18.5 | y3  |
| sp Q15102 PA1B3_HUMAN  | AIVQLVNER                    | 118 | 126 | 521.306198 | 630.35695   | 18.5 | y5  |
| sp Q15102 PA1B3_HUMAN  | AIVQLVNER                    | 118 | 126 | 521.306198 | 758.415528  | 18.5 | y6  |
| sp Q15102 PA1B3_HUMAN  | AIVQLVNER                    | 118 | 126 | 521.306198 | 857.483942  | 18.5 | y7  |
| sp Q15661 TRYB1_HUMAN  | DSC[+57.0]QGDSGGPLVC[+57.0]K | 217 | 230 | 740.313765 | 406.211866  | 25.1 | y3  |
| sp Q15661 TRYB1_HUMAN  | DSC[+57.0]QGDSGGPLVC[+57.0]K | 217 | 230 | 740.313765 | 730.391622  | 25.1 | y7  |
| sp Q15661 TRYB1_HUMAN  | DSC[+57.0]QGDSGGPLVC[+57.0]K | 217 | 230 | 740.313765 | 817.42365   | 25.1 | y8  |
| sp Q15661 TRYB1_HUMAN  | DSC[+57.0]QGDSGGPLVC[+57.0]K | 217 | 230 | 740.313765 | 989.472057  | 25.1 | y10 |
| sp Q15661 TRYB1_HUMAN  | YHLGAYTGDDVR                 | 191 | 202 | 683.82294  | 662.310394  | 23.4 | y6  |
| sp Q15661 TRYB1_HUMAN  | YHLGAYTGDDVR                 | 191 | 202 | 683.82294  | 825.373723  | 23.4 | y7  |
| sp Q15661 TRYB1_HUMAN  | YHLGAYTGDDVR                 | 191 | 202 | 683.82294  | 953.4323    | 23.4 | y9  |
| sp Q15661 TRYB1_HUMAN  | YHLGAYTGDDVR                 | 191 | 202 | 683.82294  | 1066.516364 | 23.4 | y10 |
| sp Q15811 ITSN1_HUMAN  | VEGLQAQALYPWR                | 912 | 924 | 765.906807 | 458.251029  | 25.9 | y3  |
| sp Q15811 ITSN1_HUMAN  | VEGLQAQALYPWR                | 912 | 924 | 765.906807 | 621.314357  | 25.9 | y4  |
| sp Q15811 ITSN1_HUMAN  | VEGLQAQALYPWR                | 912 | 924 | 765.906807 | 734.398421  | 25.9 | y5  |
| sp Q15811 ITSN1_HUMAN  | VEGLQAQALYPWR                | 912 | 924 | 765.906807 | 1004.531226 | 25.9 | y8  |
| sp Q16853 AOC3_HUMAN   | YQLAVTQR                     | 629 | 636 | 489.771991 | 404.225208  | 17.6 | y3  |
| sp Q16853 AOC3_HUMAN   | YQLAVTQR                     | 629 | 636 | 489.771991 | 503.293622  | 17.6 | y4  |
| sp Q16853 AOC3_HUMAN   | YQLAVTQR                     | 629 | 636 | 489.771991 | 574.330736  | 17.6 | y5  |
| sp Q16853 AOC3_HUMAN   | YQLAVTQR                     | 629 | 636 | 489.771991 | 687.4148    | 17.6 | y6  |
| sp Q2TBA0 KBTB5_HUMAN  | LVLAAC[+57.0]SPYFR           | 48  | 58  | 648.84209  | 669.335487  | 22.4 | y5  |
| sp Q2TBA0 KBTB5_HUMAN  | LVLAAC[+57.0]SPYFR           | 48  | 58  | 648.84209  | 829.366135  | 22.4 | y6  |
| sp Q2TBA0 KBTB5_HUMAN  | LVLAAC[+57.0]SPYFR           | 48  | 58  | 648.84209  | 900.403249  | 22.4 | y7  |
| sp Q2TBA0 KBTB5_HUMAN  | LVLAAC[+57.0]SPYFR           | 48  | 58  | 648.84209  | 971.440363  | 22.4 | y8  |
| sp Q562R1 ACTBL_HUMAN  | SYELPDGQVITIGNER             | 239 | 254 | 895.949597 | 475.225936  | 29.8 | y4  |
| sp Q562R1 ACTBL_HUMAN  | SYELPDGQVITIGNER             | 239 | 254 | 895.949597 | 689.357679  | 29.8 | y6  |
| sp Q562R1 ACTBL_HUMAN  | SYELPDGQVITIGNER             | 239 | 254 | 895.949597 | 802.441743  | 29.8 | y7  |
| sp Q562R1 ACTBL_HUMAN  | SYELPDGQVITIGNER             | 239 | 254 | 895.949597 | 1298.669905 | 29.8 | y12 |
| sp Q5T0N5 FBP1L_HUMAN  | ESPEGSYTDANQEV               | 499 | 514 | 898.882109 | 831.395521  | 29.9 | y7  |

|                         |                   |      |      |            |             |      |     |
|-------------------------|-------------------|------|------|------------|-------------|------|-----|
| sp Q5TON5 FBP1L_HUMAN   | ESPEGSYTTDDANQEVR | 499  | 514  | 898.882109 | 946.422464  | 29.9 | y8  |
| sp Q5TON5 FBP1L_HUMAN   | ESPEGSYTTDDANQEVR | 499  | 514  | 898.882109 | 1047.470142 | 29.9 | y9  |
| sp Q5TON5 FBP1L_HUMAN   | ESPEGSYTTDDANQEVR | 499  | 514  | 898.882109 | 1210.533471 | 29.9 | y10 |
| sp Q6P996 PDXD1_HUMAN   | LLEEGVLR          | 631  | 638  | 464.776742 | 444.292893  | 16.8 | y4  |
| sp Q6P996 PDXD1_HUMAN   | LLEEGVLR          | 631  | 638  | 464.776742 | 573.335487  | 16.8 | y5  |
| sp Q6P996 PDXD1_HUMAN   | LLEEGVLR          | 631  | 638  | 464.776742 | 702.37808   | 16.8 | y6  |
| sp Q6P996 PDXD1_HUMAN   | LLEEGVLR          | 631  | 638  | 464.776742 | 815.462144  | 16.8 | y7  |
| sp Q6PCE3 PGM2L_HUMAN   | YVPTPFVVPYAVQK    | 150  | 162  | 754.911027 | 705.393001  | 25.6 | y6  |
| sp Q6PCE3 PGM2L_HUMAN   | YVPTPFVVPYAVQK    | 150  | 162  | 754.911027 | 804.461415  | 25.6 | y7  |
| sp Q6PCE3 PGM2L_HUMAN   | YVPTPFVVPYAVQK    | 150  | 162  | 754.911027 | 1048.582593 | 25.6 | y9  |
| sp Q6PCE3 PGM2L_HUMAN   | YVPTPFVVPYAVQK    | 150  | 162  | 754.911027 | 1246.683036 | 25.6 | y11 |
| sp Q86U86 PB1_HUMAN     | SYYPKDSPEYK       | 124  | 134  | 688.822075 | 536.271489  | 23.6 | y4  |
| sp Q86U86 PB1_HUMAN     | SYYPKDSPEYK       | 124  | 134  | 688.822075 | 623.303518  | 23.6 | y5  |
| sp Q86U86 PB1_HUMAN     | SYYPKDSPEYK       | 124  | 134  | 688.822075 | 835.383225  | 23.6 | y7  |
| sp Q86U86 PB1_HUMAN     | SYYPKDSPEYK       | 124  | 134  | 688.822075 | 963.478188  | 23.6 | y8  |
| sp Q86UX7 URP2_HUMAN    | VVLAGGVAPALFR     | 166  | 178  | 635.387522 | 603.361307  | 22   | y5  |
| sp Q86UX7 URP2_HUMAN    | VVLAGGVAPALFR     | 166  | 178  | 635.387522 | 674.398421  | 22   | y6  |
| sp Q86UX7 URP2_HUMAN    | VVLAGGVAPALFR     | 166  | 178  | 635.387522 | 830.488299  | 22   | y8  |
| sp Q86UX7 URP2_HUMAN    | VVLAGGVAPALFR     | 166  | 178  | 635.387522 | 958.546876  | 22   | y10 |
| sp Q86VB7-2 C163A_HUMAN | TSYQVYSK          | 421  | 428  | 488.242732 | 397.208161  | 17.6 | y3  |
| sp Q86VB7-2 C163A_HUMAN | TSYQVYSK          | 421  | 428  | 488.242732 | 496.276575  | 17.6 | y4  |
| sp Q86VB7-2 C163A_HUMAN | TSYQVYSK          | 421  | 428  | 488.242732 | 624.335152  | 17.6 | y5  |
| sp Q86VB7-2 C163A_HUMAN | TSYQVYSK          | 421  | 428  | 488.242732 | 787.398481  | 17.6 | y6  |
| sp Q86Y39-2 NDUAB_HUMAN | VTLNPPGTFLEGVAK   | 40   | 54   | 771.929948 | 763.434866  | 26.1 | y7  |
| sp Q86Y39-2 NDUAB_HUMAN | VTLNPPGTFLEGVAK   | 40   | 54   | 771.929948 | 1018.556772 | 26.1 | y10 |
| sp Q86Y39-2 NDUAB_HUMAN | VTLNPPGTFLEGVAK   | 40   | 54   | 771.929948 | 1115.609536 | 26.1 | y11 |
| sp Q86Y39-2 NDUAB_HUMAN | VTLNPPGTFLEGVAK   | 40   | 54   | 771.929948 | 1229.652464 | 26.1 | y12 |
| sp Q8IUX7 AEBP1_HUMAN   | VPNNLPIPER        | 721  | 731  | 631.846218 | 401.214309  | 21.9 | y3  |
| sp Q8IUX7 AEBP1_HUMAN   | VPNNLPIPER        | 721  | 731  | 631.846218 | 611.351137  | 21.9 | y5  |
| sp Q8IUX7 AEBP1_HUMAN   | VPNNLPIPER        | 721  | 731  | 631.846218 | 724.435201  | 21.9 | y6  |
| sp Q8IUX7 AEBP1_HUMAN   | VPNNLPIPER        | 721  | 731  | 631.846218 | 1066.563983 | 21.9 | y9  |
| sp Q8IYB3 SRRM1_HUMAN   | EPSVQEATSTSDILK   | 231  | 245  | 802.904324 | 763.41961   | 27   | y7  |
| sp Q8IYB3 SRRM1_HUMAN   | EPSVQEATSTSDILK   | 231  | 245  | 802.904324 | 864.467289  | 27   | y8  |
| sp Q8IYB3 SRRM1_HUMAN   | EPSVQEATSTSDILK   | 231  | 245  | 802.904324 | 935.504403  | 27   | y9  |
| sp Q8IYB3 SRRM1_HUMAN   | EPSVQEATSTSDILK   | 231  | 245  | 802.904324 | 1192.605573 | 27   | y11 |
| sp Q8IYB3 SRRM1_HUMAN   | VNLEVIKPWITK      | 448  | 457  | 720.434669 | 644.376623  | 24.5 | y5  |
| sp Q8IYB3 SRRM1_HUMAN   | VNLEVIKPWITK      | 448  | 457  | 720.434669 | 772.471586  | 24.5 | y6  |
| sp Q8IYB3 SRRM1_HUMAN   | VNLEVIKPWITK      | 448  | 457  | 720.434669 | 885.55565   | 24.5 | y7  |
| sp Q8N7H5 PAF1_HUMAN    | LLEEEIQAPTSSK     | 106  | 118  | 722.880121 | 519.277303  | 24.6 | y5  |
| sp Q8N7H5 PAF1_HUMAN    | LLEEEIQAPTSSK     | 106  | 118  | 722.880121 | 590.314417  | 24.6 | y6  |
| sp Q8N7H5 PAF1_HUMAN    | LLEEEIQAPTSSK     | 106  | 118  | 722.880121 | 831.457058  | 24.6 | y8  |
| sp Q8N7H5 PAF1_HUMAN    | LLEEEIQAPTSSK     | 106  | 118  | 722.880121 | 1089.542245 | 24.6 | y10 |
| sp Q8N7H5 PAF1_HUMAN    | TEYISTEFNR        | 133  | 142  | 630.298767 | 436.230293  | 21.8 | y3  |
| sp Q8N7H5 PAF1_HUMAN    | TEYISTEFNR        | 133  | 142  | 630.298767 | 753.352593  | 21.8 | y6  |
| sp Q8N7H5 PAF1_HUMAN    | TEYISTEFNR        | 133  | 142  | 630.298767 | 866.436657  | 21.8 | y7  |
| sp Q8N7H5 PAF1_HUMAN    | TEYISTEFNR        | 133  | 142  | 630.298767 | 1029.499986 | 21.8 | y8  |
| sp Q8NC51 PAIRB_HUMAN   | SAAQAAAQTNNAAGK   | 52   | 67   | 730.858043 | 762.374057  | 24.8 | y8  |
| sp Q8NC51 PAIRB_HUMAN   | SAAQAAAQTNNAAGK   | 52   | 67   | 730.858043 | 961.469748  | 24.8 | y10 |
| sp Q8NC51 PAIRB_HUMAN   | SAAQAAAQTNNAAGK   | 52   | 67   | 730.858043 | 1001.464663 | 24.8 | b11 |
| sp Q8NC51 PAIRB_HUMAN   | SAAQAAAQTNNAAGK   | 52   | 67   | 730.858043 | 1032.506862 | 24.8 | y11 |
| sp Q8TD06 AGR3_HUMAN    | DLPLLIENMK        | 146  | 155  | 593.331024 | 521.238809  | 20.7 | y4  |
| sp Q8TD06 AGR3_HUMAN    | DLPLLIENMK        | 146  | 155  | 593.331024 | 634.322873  | 20.7 | y5  |
| sp Q8TD06 AGR3_HUMAN    | DLPLLIENMK        | 146  | 155  | 593.331024 | 747.406937  | 20.7 | y6  |
| sp Q8TD06 AGR3_HUMAN    | DLPLLIENMK        | 146  | 155  | 593.331024 | 957.543765  | 20.7 | y8  |
| sp Q8TD06 AGR3_HUMAN    | VFAQNEEQEMAQNK    | 79   | 93   | 889.922525 | 460.251423  | 29.6 | y4  |
| sp Q8TD06 AGR3_HUMAN    | VFAQNEEQEMAQNK    | 79   | 93   | 889.922525 | 720.3345    | 29.6 | y6  |
| sp Q8TD06 AGR3_HUMAN    | VFAQNEEQEMAQNK    | 79   | 93   | 889.922525 | 848.393078  | 29.6 | y7  |
| sp Q8TD06 AGR3_HUMAN    | VFAQNEEQEMAQNK    | 79   | 93   | 889.922525 | 1090.519735 | 29.6 | y9  |
| sp Q8WXX0 DYH7_HUMAN    | SVLTAAGNLK        | 1506 | 1515 | 487.287474 | 431.261259  | 17.5 | y4  |
| sp Q8WXX0 DYH7_HUMAN    | SVLTAAGNLK        | 1506 | 1515 | 487.287474 | 502.298373  | 17.5 | y5  |
| sp Q8WXX0 DYH7_HUMAN    | SVLTAAGNLK        | 1506 | 1515 | 487.287474 | 674.383165  | 17.5 | y7  |
| sp Q8WXX0 DYH7_HUMAN    | SVLTAAGNLK        | 1506 | 1515 | 487.287474 | 787.467229  | 17.5 | y8  |

|                       |                      |     |     |            |             |      |     |
|-----------------------|----------------------|-----|-----|------------|-------------|------|-----|
| sp Q8WYJ6 SEPT1_HUMAN | VNIIPVIGK            | 162 | 170 | 476.813127 | 513.339509  | 17.2 | y5  |
| sp Q8WYJ6 SEPT1_HUMAN | VNIIPVIGK            | 162 | 170 | 476.813127 | 626.423573  | 17.2 | y6  |
| sp Q8WYJ6 SEPT1_HUMAN | VNIIPVIGK            | 162 | 170 | 476.813127 | 739.507637  | 17.2 | y7  |
| sp Q8WYJ6 SEPT1_HUMAN | VNIIPVIGK            | 162 | 170 | 476.813127 | 853.550565  | 17.2 | y8  |
| sp Q92598 HS105_HUMAN | AFNDPFIQK            | 73  | 81  | 540.279649 | 632.376623  | 19.1 | y5  |
| sp Q92598 HS105_HUMAN | AFNDPFIQK            | 73  | 81  | 540.279649 | 747.403566  | 19.1 | y6  |
| sp Q92598 HS105_HUMAN | AFNDPFIQK            | 73  | 81  | 540.279649 | 805.387916  | 19.1 | b7  |
| sp Q92598 HS105_HUMAN | AFNDPFIQK            | 73  | 81  | 540.279649 | 861.446494  | 19.1 | y7  |
| sp Q92804 RBP56_HUMAN | AAIDWFDGK            | 297 | 305 | 511.750724 | 466.229624  | 18.3 | y4  |
| sp Q92804 RBP56_HUMAN | AAIDWFDGK            | 297 | 305 | 511.750724 | 652.308937  | 18.3 | y5  |
| sp Q92804 RBP56_HUMAN | AAIDWFDGK            | 297 | 305 | 511.750724 | 767.335881  | 18.3 | y6  |
| sp Q92804 RBP56_HUMAN | AAIDWFDGK            | 297 | 305 | 511.750724 | 880.419945  | 18.3 | y7  |
| sp Q92804 RBP56_HUMAN | GEATVSFDDPPSAK       | 283 | 296 | 710.833171 | 499.287474  | 24.2 | y5  |
| sp Q92804 RBP56_HUMAN | GEATVSFDDPPSAK       | 283 | 296 | 710.833171 | 876.409774  | 24.2 | y8  |
| sp Q92804 RBP56_HUMAN | GEATVSFDDPPSAK       | 283 | 296 | 710.833171 | 963.441802  | 24.2 | y9  |
| sp Q92804 RBP56_HUMAN | GEATVSFDDPPSAK       | 283 | 296 | 710.833171 | 1062.510216 | 24.2 | y10 |
| sp Q96AE4 FUBP1_HUMAN | IGGDAGTSLNSNDYGYGGQK | 44  | 63  | 987.445408 | 609.299101  | 32.5 | y6  |
| sp Q96AE4 FUBP1_HUMAN | IGGDAGTSLNSNDYGYGGQK | 44  | 63  | 987.445408 | 772.36243   | 32.5 | y7  |
| sp Q96AE4 FUBP1_HUMAN | IGGDAGTSLNSNDYGYGGQK | 44  | 63  | 987.445408 | 1088.464329 | 32.5 | y10 |
| sp Q96AE4 FUBP1_HUMAN | IGGDAGTSLNSNDYGYGGQK | 44  | 63  | 987.445408 | 1202.507256 | 32.5 | y11 |
| sp Q96FZ2 CC037_HUMAN | GTAGLLEQWLK          | 328 | 338 | 608.340238 | 446.276181  | 21.2 | y3  |
| sp Q96FZ2 CC037_HUMAN | GTAGLLEQWLK          | 328 | 338 | 608.340238 | 574.334758  | 21.2 | y4  |
| sp Q96FZ2 CC037_HUMAN | GTAGLLEQWLK          | 328 | 338 | 608.340238 | 703.377351  | 21.2 | y5  |
| sp Q96FZ2 CC037_HUMAN | GTAGLLEQWLK          | 328 | 338 | 608.340238 | 816.461415  | 21.2 | y6  |
| sp Q96G03 PGM2_HUMAN  | IVLANDPDADR          | 316 | 326 | 599.806759 | 573.262716  | 20.9 | y5  |
| sp Q96G03 PGM2_HUMAN  | IVLANDPDADR          | 316 | 326 | 599.806759 | 802.332586  | 20.9 | y7  |
| sp Q96G03 PGM2_HUMAN  | IVLANDPDADR          | 316 | 326 | 599.806759 | 873.3697    | 20.9 | y8  |
| sp Q96G03 PGM2_HUMAN  | IVLANDPDADR          | 316 | 326 | 599.806759 | 986.453764  | 20.9 | y9  |
| sp Q96NY7 CLIC6_HUMAN | VGDGPQQEPGEDEER      | 358 | 372 | 821.352987 | 548.231081  | 27.5 | y4  |
| sp Q96NY7 CLIC6_HUMAN | VGDGPQQEPGEDEER      | 358 | 372 | 821.352987 | 831.347902  | 27.5 | y7  |
| sp Q96NY7 CLIC6_HUMAN | VGDGPQQEPGEDEER      | 358 | 372 | 821.352987 | 960.390495  | 27.5 | y8  |
| sp Q99747 SNAG_HUMAN  | LGLSLVPGGGIK         | 268 | 280 | 605.381905 | 528.314023  | 21.1 | y6  |
| sp Q99747 SNAG_HUMAN  | LGLSLVPGGGIK         | 268 | 280 | 605.381905 | 627.382437  | 21.1 | y7  |
| sp Q99747 SNAG_HUMAN  | LGLSLVPGGGIK         | 268 | 280 | 605.381905 | 726.450851  | 21.1 | y8  |
| sp Q99747 SNAG_HUMAN  | LGLSLVPGGGIK         | 268 | 280 | 605.381905 | 926.566943  | 21.1 | y10 |
| sp Q99747 SNAG_HUMAN  | LIENVDPEK            | 123 | 131 | 528.782221 | 373.208161  | 18.8 | y3  |
| sp Q99747 SNAG_HUMAN  | LIENVDPEK            | 123 | 131 | 528.782221 | 488.235104  | 18.8 | y4  |
| sp Q99747 SNAG_HUMAN  | LIENVDPEK            | 123 | 131 | 528.782221 | 701.346445  | 18.8 | y6  |
| sp Q99747 SNAG_HUMAN  | LIENVDPEK            | 123 | 131 | 528.782221 | 830.389038  | 18.8 | y7  |
| sp Q9BR76 COR1B_HUMAN | DADPILISLR           | 383 | 392 | 556.819138 | 375.235044  | 19.6 | y3  |
| sp Q9BR76 COR1B_HUMAN | DADPILISLR           | 383 | 392 | 556.819138 | 488.319108  | 19.6 | y4  |
| sp Q9BR76 COR1B_HUMAN | DADPILISLR           | 383 | 392 | 556.819138 | 601.403172  | 19.6 | y5  |
| sp Q9BR76 COR1B_HUMAN | DADPILISLR           | 383 | 392 | 556.819138 | 811.54      | 19.6 | y7  |
| sp Q9BR76 COR1B_HUMAN | VTWDSTFC[+57.0]AVNP  | 33  | 45  | 762.861208 | 358.208495  | 25.8 | y3  |
| sp Q9BR76 COR1B_HUMAN | VTWDSTFC[+57.0]AVNP  | 33  | 45  | 762.861208 | 457.276909  | 25.8 | y4  |
| sp Q9BR76 COR1B_HUMAN | VTWDSTFC[+57.0]AVNP  | 33  | 45  | 762.861208 | 688.344671  | 25.8 | y6  |
| sp Q9BR76 COR1B_HUMAN | VTWDSTFC[+57.0]AVNP  | 33  | 45  | 762.861208 | 835.413085  | 25.8 | y7  |
| sp Q9BRJ2 RM45_HUMAN  | QLTNPYGSWR           | 250 | 259 | 611.304186 | 765.367849  | 21.2 | y6  |
| sp Q9BRJ2 RM45_HUMAN  | QLTNPYGSWR           | 250 | 259 | 611.304186 | 879.410777  | 21.2 | y7  |
| sp Q9BRJ2 RM45_HUMAN  | QLTNPYGSWR           | 250 | 259 | 611.304186 | 980.458455  | 21.2 | y8  |
| sp Q9BRX2 PELO_HUMAN  | FYEQVVQAIQR          | 184 | 194 | 690.867151 | 487.298707  | 23.6 | y4  |
| sp Q9BRX2 PELO_HUMAN  | FYEQVVQAIQR          | 184 | 194 | 690.867151 | 615.357285  | 23.6 | y5  |
| sp Q9BRX2 PELO_HUMAN  | FYEQVVQAIQR          | 184 | 194 | 690.867151 | 714.425699  | 23.6 | y6  |
| sp Q9BRX2 PELO_HUMAN  | VQTESSTGSVGSNR       | 46  | 59  | 704.836776 | 433.215371  | 24.1 | y4  |
| sp Q9BRX2 PELO_HUMAN  | VQTESSTGSVGSNR       | 46  | 59  | 704.836776 | 532.283785  | 24.1 | y5  |
| sp Q9BRX2 PELO_HUMAN  | VQTESSTGSVGSNR       | 46  | 59  | 704.836776 | 951.449013  | 24.1 | y10 |
| sp Q9BTT0 AN32E_HUMAN | DLSTVEALQNLK         | 101 | 112 | 665.864274 | 502.298373  | 22.9 | y4  |
| sp Q9BTT0 AN32E_HUMAN | DLSTVEALQNLK         | 101 | 112 | 665.864274 | 615.382437  | 22.9 | y5  |
| sp Q9BTT0 AN32E_HUMAN | DLSTVEALQNLK         | 101 | 112 | 665.864274 | 686.419551  | 22.9 | y6  |
| sp Q9BTT0 AN32E_HUMAN | DLSTVEALQNLK         | 101 | 112 | 665.864274 | 815.462144  | 22.9 | y7  |
| sp Q9BVK6 TMED9_HUMAN | QLVEQVEQIQK          | 169 | 179 | 671.372266 | 516.314023  | 23   | y4  |
| sp Q9BVK6 TMED9_HUMAN | QLVEQVEQIQK          | 169 | 179 | 671.372266 | 645.356616  | 23   | y5  |
| sp Q9BVK6 TMED9_HUMAN | QLVEQVEQIQK          | 169 | 179 | 671.372266 | 744.42503   | 23   | y6  |
| sp Q9BVK6 TMED9_HUMAN | QLVEQVEQIQK          | 169 | 179 | 671.372266 | 1001.526201 | 23   | y8  |
| sp Q9BXS5 AP1M1_HUMAN | HNNLYLVATSK          | 61  | 71  | 630.340769 | 781.445431  | 21.8 | y7  |

|                         |                  |     |     |            |             |      |     |
|-------------------------|------------------|-----|-----|------------|-------------|------|-----|
| sp Q9BXS5 AP1M1_HUMAN   | HNNLYLVATSK      | 61  | 71  | 630.340769 | 894.529495  | 21.8 | y8  |
| sp Q9BXS5 AP1M1_HUMAN   | HNNLYLVATSK      | 61  | 71  | 630.340769 | 1008.572423 | 21.8 | y9  |
| sp Q9BXS5 AP1M1_HUMAN   | HNNLYLVATSK      | 61  | 71  | 630.340769 | 1122.61535  | 21.8 | y10 |
| sp Q9BYX2 TBD2A_HUMAN   | WAALGDLVPSAELK   | 605 | 618 | 735.403566 | 644.361367  | 25   | y6  |
| sp Q9BYX2 TBD2A_HUMAN   | WAALGDLVPSAELK   | 605 | 618 | 735.403566 | 1028.562252 | 25   | y10 |
| sp Q9BYX2 TBD2A_HUMAN   | WAALGDLVPSAELK   | 605 | 618 | 735.403566 | 1141.646316 | 25   | y11 |
| sp Q9BYX2 TBD2A_HUMAN   | WAALGDLVPSAELK   | 605 | 618 | 735.403566 | 1212.68343  | 25   | y12 |
| sp Q9GZM7 TINAL_HUMAN   | ITGWGEETLPDGR    | 403 | 415 | 715.849155 | 444.220122  | 24.4 | y4  |
| sp Q9GZM7 TINAL_HUMAN   | ITGWGEETLPDGR    | 403 | 415 | 715.849155 | 557.304186  | 24.4 | y5  |
| sp Q9GZM7 TINAL_HUMAN   | ITGWGEETLPDGR    | 403 | 415 | 715.849155 | 658.351865  | 24.4 | y6  |
| sp Q9GZM7 TINAL_HUMAN   | ITGWGEETLPDGR    | 403 | 415 | 715.849155 | 973.458515  | 24.4 | y9  |
| sp Q9H2U2-2 IPYR2_HUMAN | AFALEVIK         | 261 | 268 | 445.770928 | 359.265282  | 16.3 | y3  |
| sp Q9H2U2-2 IPYR2_HUMAN | AFALEVIK         | 261 | 268 | 445.770928 | 488.307875  | 16.3 | y4  |
| sp Q9H2U2-2 IPYR2_HUMAN | AFALEVIK         | 261 | 268 | 445.770928 | 601.391939  | 16.3 | y5  |
| sp Q9H2U2-2 IPYR2_HUMAN | AFALEVIK         | 261 | 268 | 445.770928 | 672.429053  | 16.3 | y6  |
| sp Q9H2U2-2 IPYR2_HUMAN | SLVESVSSSPNK     | 308 | 319 | 617.319699 | 445.240524  | 21.4 | y4  |
| sp Q9H2U2-2 IPYR2_HUMAN | SLVESVSSSPNK     | 308 | 319 | 617.319699 | 805.405023  | 21.4 | y8  |
| sp Q9H2U2-2 IPYR2_HUMAN | SLVESVSSSPNK     | 308 | 319 | 617.319699 | 934.447616  | 21.4 | y9  |
| sp Q9H2U2-2 IPYR2_HUMAN | SLVESVSSSPNK     | 308 | 319 | 617.319699 | 1033.51603  | 21.4 | y10 |
| sp Q9H3U1 UN45A_HUMAN   | ALIPLALEGTDVGQTK | 691 | 706 | 813.45907  | 748.383559  | 27.3 | y7  |
| sp Q9H3U1 UN45A_HUMAN   | ALIPLALEGTDVGQTK | 691 | 706 | 813.45907  | 805.405023  | 27.3 | y8  |
| sp Q9H3U1 UN45A_HUMAN   | ALIPLALEGTDVGQTK | 691 | 706 | 813.45907  | 1047.53168  | 27.3 | y10 |
| sp Q9H3U1 UN45A_HUMAN   | ALIPLALEGTDVGQTK | 691 | 706 | 813.45907  | 1328.705622 | 27.3 | y13 |
| sp Q9H3U1 UN45A_HUMAN   | DNALTLLIK        | 312 | 320 | 500.805499 | 486.364996  | 17.9 | y4  |
| sp Q9H3U1 UN45A_HUMAN   | DNALTLLIK        | 312 | 320 | 500.805499 | 587.412674  | 17.9 | y5  |
| sp Q9H3U1 UN45A_HUMAN   | DNALTLLIK        | 312 | 320 | 500.805499 | 700.496738  | 17.9 | y6  |
| sp Q9H3U1 UN45A_HUMAN   | DNALTLLIK        | 312 | 320 | 500.805499 | 771.533852  | 17.9 | y7  |
| sp Q9H4A3-6 WNK1_HUMAN  | QQVEQSSASQTGIK   | 590 | 603 | 745.875901 | 633.356616  | 25.3 | y6  |
| sp Q9H4A3-6 WNK1_HUMAN  | QQVEQSSASQTGIK   | 590 | 603 | 745.875901 | 791.425758  | 25.3 | y8  |
| sp Q9H4A3-6 WNK1_HUMAN  | QQVEQSSASQTGIK   | 590 | 603 | 745.875901 | 878.457787  | 25.3 | y9  |
| sp Q9H4A3-6 WNK1_HUMAN  | QQVEQSSASQTGIK   | 590 | 603 | 745.875901 | 1135.558957 | 25.3 | y11 |
| sp Q9H4A3-6 WNK1_HUMAN  | VELAEEDDGEK      | 486 | 496 | 617.277697 | 692.27334   | 21.4 | y6  |
| sp Q9H4A3-6 WNK1_HUMAN  | VELAEEDDGEK      | 486 | 496 | 617.277697 | 821.315933  | 21.4 | y7  |
| sp Q9H4A3-6 WNK1_HUMAN  | VELAEEDDGEK      | 486 | 496 | 617.277697 | 892.353047  | 21.4 | y8  |
| sp Q9H4A3-6 WNK1_HUMAN  | VELAEEDDGEK      | 486 | 496 | 617.277697 | 1005.437111 | 21.4 | y9  |
| sp Q9H4M9 EHD1_HUMAN    | ELVNNLGEIYQK     | 329 | 340 | 710.377548 | 737.382831  | 24.2 | y6  |
| sp Q9H4M9 EHD1_HUMAN    | ELVNNLGEIYQK     | 329 | 340 | 710.377548 | 850.466895  | 24.2 | y7  |
| sp Q9H4M9 EHD1_HUMAN    | ELVNNLGEIYQK     | 329 | 340 | 710.377548 | 964.509822  | 24.2 | y8  |
| sp Q9H4M9 EHD1_HUMAN    | ELVNNLGEIYQK     | 329 | 340 | 710.377548 | 1078.55275  | 24.2 | y9  |
| sp Q9H4M9 EHD1_HUMAN    | LFEAEEQDLFK      | 269 | 279 | 684.837725 | 779.393395  | 23.5 | y6  |
| sp Q9H4M9 EHD1_HUMAN    | LFEAEEQDLFK      | 269 | 279 | 684.837725 | 908.435989  | 23.5 | y7  |
| sp Q9H4M9 EHD1_HUMAN    | LFEAEEQDLFK      | 269 | 279 | 684.837725 | 979.473102  | 23.5 | y8  |
| sp Q9H4M9 EHD1_HUMAN    | LFEAEEQDLFK      | 269 | 279 | 684.837725 | 1108.515696 | 23.5 | y9  |
| sp Q9H993 CF211_HUMAN   | LLQISLWGNK       | 183 | 192 | 586.345323 | 504.256508  | 20.5 | y4  |
| sp Q9H993 CF211_HUMAN   | LLQISLWGNK       | 183 | 192 | 586.345323 | 704.3726    | 20.5 | y6  |
| sp Q9H993 CF211_HUMAN   | LLQISLWGNK       | 183 | 192 | 586.345323 | 817.456664  | 20.5 | y7  |
| sp Q9H993 CF211_HUMAN   | LLQISLWGNK       | 183 | 192 | 586.345323 | 945.515242  | 20.5 | y8  |
| sp Q9HB71 CYBP_HUMAN    | ISNYGWDQSDK      | 74  | 84  | 656.793849 | 592.257296  | 22.6 | y5  |
| sp Q9HB71 CYBP_HUMAN    | ISNYGWDQSDK      | 74  | 84  | 656.793849 | 835.358073  | 22.6 | y7  |
| sp Q9HB71 CYBP_HUMAN    | ISNYGWDQSDK      | 74  | 84  | 656.793849 | 998.421401  | 22.6 | y8  |
| sp Q9HB71 CYBP_HUMAN    | ISNYGWDQSDK      | 74  | 84  | 656.793849 | 1112.464329 | 22.6 | y9  |
| sp Q9HC35 EMAL4_HUMAN   | WFVLDAETR        | 656 | 664 | 568.790381 | 476.246337  | 20   | y4  |
| sp Q9HC35 EMAL4_HUMAN   | WFVLDAETR        | 656 | 664 | 568.790381 | 591.27328   | 20   | y5  |
| sp Q9HC35 EMAL4_HUMAN   | WFVLDAETR        | 656 | 664 | 568.790381 | 704.357344  | 20   | y6  |
| sp Q9HC35 EMAL4_HUMAN   | WFVLDAETR        | 656 | 664 | 568.790381 | 803.425758  | 20   | y7  |
| sp Q9P2P6 STAR9_HUMAN   | DSVLTWLLK        | 337 | 345 | 537.813324 | 559.360245  | 19   | y4  |
| sp Q9P2P6 STAR9_HUMAN   | DSVLTWLLK        | 337 | 345 | 537.813324 | 660.407923  | 19   | y5  |
| sp Q9P2P6 STAR9_HUMAN   | DSVLTWLLK        | 337 | 345 | 537.813324 | 773.491987  | 19   | y6  |

|                         |                 |     |     |            |             |      |     |
|-------------------------|-----------------|-----|-----|------------|-------------|------|-----|
| sp Q9P2P6 STAR9_HUMAN   | DSVLTWLLK       | 337 | 345 | 537.813324 | 872.560401  | 19   | y7  |
| sp Q9UBC3 DNM3B_HUMAN   | EFGIGDLVWGK     | 221 | 231 | 610.819138 | 390.21358   | 21.2 | y3  |
| sp Q9UBC3 DNM3B_HUMAN   | EFGIGDLVWGK     | 221 | 231 | 610.819138 | 489.281994  | 21.2 | y4  |
| sp Q9UBC3 DNM3B_HUMAN   | EFGIGDLVWGK     | 221 | 231 | 610.819138 | 774.414465  | 21.2 | y7  |
| sp Q9UBC3 DNM3B_HUMAN   | EFGIGDLVWGK     | 221 | 231 | 610.819138 | 944.519993  | 21.2 | y9  |
| sp Q9UBC3 DNM3B_HUMAN   | WVQWFGDGK       | 259 | 267 | 561.771991 | 376.182674  | 19.8 | y4  |
| sp Q9UBC3 DNM3B_HUMAN   | WVQWFGDGK       | 259 | 267 | 561.771991 | 523.251088  | 19.8 | y5  |
| sp Q9UBC3 DNM3B_HUMAN   | WVQWFGDGK       | 259 | 267 | 561.771991 | 709.330401  | 19.8 | y6  |
| sp Q9UBC3 DNM3B_HUMAN   | WVQWFGDGK       | 259 | 267 | 561.771991 | 837.388979  | 19.8 | y7  |
| sp Q9UHD1 CHRD1_HUMAN   | AEPMQWASLELPAAK | 306 | 320 | 821.41889  | 386.239795  | 27.5 | y4  |
| sp Q9UHD1 CHRD1_HUMAN   | AEPMQWASLELPAAK | 306 | 320 | 821.41889  | 628.366452  | 27.5 | y6  |
| sp Q9UHD1 CHRD1_HUMAN   | AEPMQWASLELPAAK | 306 | 320 | 821.41889  | 741.450516  | 27.5 | y7  |
| sp Q9UHD1 CHRD1_HUMAN   | AEPMQWASLELPAAK | 306 | 320 | 821.41889  | 899.519659  | 27.5 | y9  |
| sp Q9UI08-2 EVL_HUMAN   | AASQPPNSSEAGR   | 310 | 322 | 636.302372 | 720.327107  | 22   | y7  |
| sp Q9UI08-2 EVL_HUMAN   | AASQPPNSSEAGR   | 310 | 322 | 636.302372 | 817.379871  | 22   | y8  |
| sp Q9UI08-2 EVL_HUMAN   | AASQPPNSSEAGR   | 310 | 322 | 636.302372 | 914.432635  | 22   | y9  |
| sp Q9UI08-2 EVL_HUMAN   | SNSVEKPVSSILSR  | 330 | 343 | 501.610616 | 375.235044  | 21.3 | y3  |
| sp Q9UI08-2 EVL_HUMAN   | SNSVEKPVSSILSR  | 330 | 343 | 501.610616 | 488.319108  | 21.3 | y4  |
| sp Q9UI08-2 EVL_HUMAN   | SNSVEKPVSSILSR  | 330 | 343 | 501.610616 | 575.351137  | 21.3 | y5  |
| sp Q9UI08-2 EVL_HUMAN   | SNSVEKPVSSILSR  | 330 | 343 | 501.610616 | 662.383165  | 21.3 | y6  |
| sp Q9UL46 PSME2_HUMAN   | DEAAYGELR       | 194 | 202 | 512.240721 | 474.267073  | 18.3 | y4  |
| sp Q9UL46 PSME2_HUMAN   | DEAAYGELR       | 194 | 202 | 512.240721 | 637.330401  | 18.3 | y5  |
| sp Q9UL46 PSME2_HUMAN   | DEAAYGELR       | 194 | 202 | 512.240721 | 708.367515  | 18.3 | y6  |
| sp Q9UL46 PSME2_HUMAN   | DEAAYGELR       | 194 | 202 | 512.240721 | 779.404629  | 18.3 | y7  |
| sp Q9ULH1-2 ASAP1_HUMAN | GEQSAGENSLEDLTK | 424 | 438 | 789.368106 | 476.271489  | 26.6 | y4  |
| sp Q9ULH1-2 ASAP1_HUMAN | GEQSAGENSLEDLTK | 424 | 438 | 789.368106 | 919.473102  | 26.6 | y8  |
| sp Q9ULH1-2 ASAP1_HUMAN | GEQSAGENSLEDLTK | 424 | 438 | 789.368106 | 1105.537159 | 26.6 | y10 |
| sp Q9ULH1-2 ASAP1_HUMAN | GEQSAGENSLEDLTK | 424 | 438 | 789.368106 | 1176.574273 | 26.6 | y11 |
| sp Q9Y2J8 PADI2_HUMAN   | ELLGPDFGYVTR    | 383 | 394 | 683.853709 | 595.319837  | 23.4 | y5  |
| sp Q9Y2J8 PADI2_HUMAN   | ELLGPDFGYVTR    | 383 | 394 | 683.853709 | 742.38825   | 23.4 | y6  |
| sp Q9Y2J8 PADI2_HUMAN   | ELLGPDFGYVTR    | 383 | 394 | 683.853709 | 954.467957  | 23.4 | y8  |
| sp Q9Y2J8 PADI2_HUMAN   | ELLGPDFGYVTR    | 383 | 394 | 683.853709 | 1011.489421 | 23.4 | y9  |
| sp Q9Y305-4 ACOT9_HUMAN | VHSEVASLQEK     | 372 | 382 | 613.822409 | 604.330067  | 21.3 | y5  |
| sp Q9Y305-4 ACOT9_HUMAN | VHSEVASLQEK     | 372 | 382 | 613.822409 | 675.367181  | 21.3 | y6  |
| sp Q9Y305-4 ACOT9_HUMAN | VHSEVASLQEK     | 372 | 382 | 613.822409 | 903.478188  | 21.3 | y8  |
| sp Q9Y305-4 ACOT9_HUMAN | VHSEVASLQEK     | 372 | 382 | 613.822409 | 990.510216  | 21.3 | y9  |
| sp Q9Y305-4 ACOT9_HUMAN | YLTVQNTVR       | 103 | 111 | 547.303655 | 489.277972  | 19.3 | y4  |
| sp Q9Y305-4 ACOT9_HUMAN | YLTVQNTVR       | 103 | 111 | 547.303655 | 617.336549  | 19.3 | y5  |
| sp Q9Y305-4 ACOT9_HUMAN | YLTVQNTVR       | 103 | 111 | 547.303655 | 716.404963  | 19.3 | y6  |
| sp Q9Y305-4 ACOT9_HUMAN | YLTVQNTVR       | 103 | 111 | 547.303655 | 817.452642  | 19.3 | y7  |
| sp Q9Y3B7 RM11_HUMAN    | IGQPTVSYFLK     | 81  | 91  | 626.850438 | 570.32861   | 21.7 | y4  |
| sp Q9Y3B7 RM11_HUMAN    | IGQPTVSYFLK     | 81  | 91  | 626.850438 | 657.360639  | 21.7 | y5  |
| sp Q9Y3B7 RM11_HUMAN    | IGQPTVSYFLK     | 81  | 91  | 626.850438 | 954.529495  | 21.7 | y8  |
| sp Q9Y3B7 RM11_HUMAN    | IGQPTVSYFLK     | 81  | 91  | 626.850438 | 1139.609536 | 21.7 | y10 |
| sp Q9Y3B8 ORN_HUMAN     | ALDDISESIK      | 195 | 204 | 545.784961 | 563.303518  | 19.3 | y5  |
| sp Q9Y3B8 ORN_HUMAN     | ALDDISESIK      | 195 | 204 | 545.784961 | 676.387582  | 19.3 | y6  |
| sp Q9Y3B8 ORN_HUMAN     | ALDDISESIK      | 195 | 204 | 545.784961 | 791.414525  | 19.3 | y7  |
| sp Q9Y3B8 ORN_HUMAN     | ALDDISESIK      | 195 | 204 | 545.784961 | 906.441468  | 19.3 | y8  |
| sp Q9Y520-7 PRC2C_HUMAN | ISAVESQPSR      | 911 | 920 | 537.28292  | 359.203744  | 19   | y3  |
| sp Q9Y520-7 PRC2C_HUMAN | ISAVESQPSR      | 911 | 920 | 537.28292  | 574.29435   | 19   | y5  |
| sp Q9Y520-7 PRC2C_HUMAN | ISAVESQPSR      | 911 | 920 | 537.28292  | 703.336943  | 19   | y6  |
| sp Q9Y520-7 PRC2C_HUMAN | ISAVESQPSR      | 911 | 920 | 537.28292  | 873.442471  | 19   | y8  |
| sp Q9Y520-7 PRC2C_HUMAN | QQVADEDEIWK     | 437 | 447 | 680.822606 | 819.38831   | 23.3 | y6  |
| sp Q9Y520-7 PRC2C_HUMAN | QQVADEDEIWK     | 437 | 447 | 680.822606 | 934.415253  | 23.3 | y7  |
| sp Q9Y520-7 PRC2C_HUMAN | QQVADEDEIWK     | 437 | 447 | 680.822606 | 1005.452367 | 23.3 | y8  |

|                         |                   |     |     |            |             |      |    |
|-------------------------|-------------------|-----|-----|------------|-------------|------|----|
| sp Q9Y520-7 PRC2C_HUMAN | QQVADEDEIWK       | 437 | 447 | 680.822606 | 1104.520781 | 23.3 | y9 |
| sp Q9Y6K5 OAS3_HUMAN    | AQLEAC[+57.0]QQER | 844 | 853 | 616.788043 | 720.309348  | 21.4 | y5 |
| sp Q9Y6K5 OAS3_HUMAN    | AQLEAC[+57.0]QQER | 844 | 853 | 616.788043 | 791.346462  | 21.4 | y6 |
| sp Q9Y6K5 OAS3_HUMAN    | AQLEAC[+57.0]QQER | 844 | 853 | 616.788043 | 920.389055  | 21.4 | y7 |
| sp Q9Y6K5 OAS3_HUMAN    | AQLEAC[+57.0]QQER | 844 | 853 | 616.788043 | 1033.473119 | 21.4 | y8 |
| sp Q9Y6K5 OAS3_HUMAN    | FISEFLQPNR        | 757 | 766 | 625.830037 | 386.214643  | 21.7 | y3 |
| sp Q9Y6K5 OAS3_HUMAN    | FISEFLQPNR        | 757 | 766 | 625.830037 | 514.273221  | 21.7 | y4 |
| sp Q9Y6K5 OAS3_HUMAN    | FISEFLQPNR        | 757 | 766 | 625.830037 | 774.425699  | 21.7 | y6 |
| sp Q9Y6K5 OAS3_HUMAN    | FISEFLQPNR        | 757 | 766 | 625.830037 | 990.50032   | 21.7 | y8 |
