# Supplementary material for: Proteomic analysis of breast tumors confirms the mRNA intrinsic molecular subtypes using different classifiers: a large-scale analysis of fresh frozen tissue samples
Source: Springer Nature journal article supplement (doi:10.1186/s13058-016-0732-2), 2016-06-29
Supplement: MOESM5 [file 10305388]

**Tumors from original dataset analyzed on SRM**

| Cancer No | HBC sample type | BRCA1 promotor methylation | ER_status | PgR_status | Expressions data -> | Sörлие subtype classified | Best Hu      | Best PAM50   |
|-----------|-----------------|----------------------------|-----------|------------|---------------------|---------------------------|--------------|--------------|
| 17613     | brca1           | negative                   | -         | -          | Expressions data -> | Basal                     | Basal        | Basal        |
| 11472     | sporadic        | negative                   | er_neg    | pgr_neg    | Expressions data -> | Basal                     | Basal        | Basal        |
| 8706      | sporadic        | negative                   | er_neg    | pgr_neg    | Expressions data -> | Basal                     | Basal        | Basal        |
| 9833      | sporadic        | negative                   | er_neg    | pgr_neg    | Expressions data -> | Basal                     | Basal        | Basal        |
| 5696      | sporadic        | positive                   | er_neg    | pgr_neg    | Expressions data -> | Basal                     | Basal        | Basal        |
| 9774      | sporadic        | -                          | er_neg    | pgr_neg    | Expressions data -> | Basal                     | Basal        | Basal        |
| 9877      | sporadic        | negative                   | er_neg    | pgr_neg    | Expressions data -> | Basal                     | Basal        | Basal        |
| 8196      | brca1           | negative                   | er_neg    | pgr_neg    | Expressions data -> | Basal                     | Basal        | Basal        |
| 11283     | brca1           | negative                   | er_neg    | pgr_neg    | Expressions data -> | Basal                     | Basal        | Basal        |
| 7596      | sporadic        | negative                   | er_neg    | pgr_neg    | Expressions data -> | ERBB2                     | Basal        | HER2enriched |
| 10656     | sporadic        | -                          | er_neg    | pgr_neg    | Expressions data -> | ERBB2                     | HER2enriched | HER2enriched |
| 11697     | bcax            | -                          | er_neg    | pgr_neg    | Expressions data -> | ERBB2                     | HER2enriched | HER2enriched |
| 10785     | bcax            | -                          | er_neg    | pgr_neg    | Expressions data -> | ERBB2                     | HER2enriched | HER2enriched |
| 15752     | bcax            | -                          | er_neg    | pgr_neg    | Expressions data -> | ERBB2                     | HER2enriched | Normal       |
| 10413     | sporadic        | -                          | er_pos    | pgr_pos    | Expressions data -> | Luminal-A                 | LumA         | LumA         |
| 11462     | sporadic        | -                          | er_pos    | pgr_pos    | Expressions data -> | Luminal-A                 | LumA         | LumA         |
| 7650      | bcax            | -                          | er_neg    | pgr_neg    | Expressions data -> | Luminal-A                 | LumA         | LumA         |
| 15478     | bcax            | -                          | er_pos    | pgr_pos    | Expressions data -> | Luminal-A                 | LumA         | LumA         |
| 15765     | bcax            | -                          | er_pos    | pgr_neg    | Expressions data -> | Luminal-A                 | LumA         | LumA         |
| 10533     | sporadic        | -                          | er_pos    | pgr_pos    | Expressions data -> | Luminal-A                 | LumA         | LumA         |
| 10017     | sporadic        | -                          | er_pos    | pgr_pos    | Expressions data -> | Luminal-A                 | Unclassified | Unclassified |
| 13644     | bcax            | -                          | er_pos    | pgr_neg    | Expressions data -> | Luminal-B                 | Unclassified | HER2enriched |
| 7223      | bcax            | negative                   | er_pos    | pgr_neg    | Expressions data -> | Luminal-B                 | LumB         | LumB         |
| 7219      | sporadic        | negative                   | er_pos    | pgr_pos    | Expressions data -> | Luminal-B                 | Unclassified | LumB         |

**Tumors from independent dataset analyzed on SRM**

|      |          |   |        |         |                     |              |              |              |
|------|----------|---|--------|---------|---------------------|--------------|--------------|--------------|
| 4404 | sporadic | - | er_pos | pgr_pos | Expressions data -> | unclassified | unclassified | unclassified |
| 4723 | sporadic | - | er_neg | pgr_neg | Expressions data -> | Normal       | Normal       | Normal       |

|      |          |          |        |         |                     |              |              |              |
|------|----------|----------|--------|---------|---------------------|--------------|--------------|--------------|
| 6009 | sporadic | -        | er_pos | pgr_pos | Expressions data -> | LumA         | LumA         | LumB         |
| 6013 | sporadic | negative | er_pos | pgr_pos | Expressions data -> | unclassified | LumB         | LumB         |
| 6029 | sporadic | negative | er_neg | pgr_neg | Expressions data -> | ERBB2        | Basal        | ERBB2        |
| 6176 | sporadic | negative | er_pos | pgr_pos | Expressions data -> | LumB         | LumB         | LumB         |
| 6191 | sporadic | positive | er_neg | pgr_neg | Expressions data -> | Basal        | Basal        | Basal        |
| 6514 | sporadic | -        | er_neg | pgr_neg | Expressions data -> | Normal       | Normal       | Normal       |
| 6877 | sporadic | -        | er_pos | pgr_pos | Expressions data -> | unclassified | unclassified | unclassified |
| 7940 | sporadic | -        | er_pos | pgr_pos | Expressions data -> | Normal       | Normal       | Normal       |
| 8613 | sporadic | negative | er_pos | pgr_pos | Expressions data -> | LumA         | LumA         | unclassified |
| 9317 | sporadic | -        | er_pos | pgr_pos | Expressions data -> | unclassified | LumA         | Normal       |
| 9322 | sporadic | positive | er_neg | pgr_neg | Expressions data -> | Basal        | Basal        | Basal        |
| 9340 | sporadic | -        | er_pos | pgr_pos | Expressions data -> | LumA         | LumB         | LumB         |
| 9460 | sporadic | negative | er_pos | pgr_pos | Expressions data -> | ERBB2        | Basal        | LumB         |
| 6127 | sporadic | -        | er_pos | pgr_pos | Expressions data -> | Normal       | Normal       | Normal       |
| 7286 | sporadic | -        | er_pos | pgr_pos | Expressions data -> | unclassified | LumA         | unclassified |
